# Supplementary material for: First Detection and Molecular Characterization of Apple Stem Grooving Virus, Apple Chlorotic Leaf Spot Virus, and Apple Hammerhead Viroid in Loquat in Spain
Source: MDPI journal article supplement (doi:10.3390/plants10112293), 2021-10-25
Supplement: s1 [file s1]

$+$ 

+

+

+

+

+

+

[illegible]

FFFFF:FFFFFFFFFFFFFFFFFFFFFFFFFFFFFFFFFFFFFFFFFFFFFFFFFFFFFFFFFFFFFFFFFFFFF  
FF,:FFFFFFFF:FF  
@A01056:60:HMTK7DSXY:1:1438:3441:20040 1:N:0:TCCTTAGC+ACTCGATT  
CCTTAGAGAGAACAAAGTTGATAATTTCTTAAAATGCATTCTGTATTTTACATGGAAAAATCAAAT  
CTTTAGGAATGTACAATGCGATAATTGACGGGAAGGACAAGTATAGGTATGGTGAGGTCTCTTTCACC  
TCCTTCAGAGATAGG  
+  
FFF,FFFFFFFFFFFFFFFFFFFFFFFFFFFFFFFFFFFFFFFFFFFFFFFFFFFFFFFFFFFFFFFFFFFFF  
FFFFFFFFFFFFFFFFFFFFFFFFFFFFFFFFFFFFFFFFFFFFFFFFFFFFFFFFFFFFFFFFFFFFFFFFF  
FFFFFFFFFFFFFFFFFFFF  
@A01056:60:HMTK7DSXY:1:1643:13331:22451 2:N:0:TCCTTAGC+ACTCGATT  
GAAAAATCAAATCTTTAGGAATGTACAATGCGATAATTGACGGGAAGGACAAGTATAGGTATGGTGAG  
GTCTCTTTCACCTCCTTCAGAGATAGGGTGATAGGTCTTAGAGATCAATGCCTTACGCGTAATAAATT  
TCCAAAAGTGTTATT  
+  
FFFFFFFFFFFFFFFFFFFFFFFFFFFFFFFFFFFFFFFFFFFFFFFFFFFFFFFFFFFFFFFFFFFF:FFFFFFFFFFFFFFFFFFFF  
FFFFFFFFFFFFFFFFFFFFFFFFFFFFFFFFFFFFFFFFFFFFFFFFFFFFFFFFFFFFFFFFFFFFFFFF:FFFFFFFFFFFFFFFF:FFFFFFFFFFFFFFFFFFFFF  
FFFFFFFFFFFFFFFFFFFF  
@A01056:60:HMTK7DSXY:1:2344:30228:16830 2:N:0:TCCTTAGC+ACTCGATT  
CTTTAGGAATGTACAATGCGATAATTGACGGGAAGGACAAGTATAGGTATGGTGAGGTCTCTTTCACC  
TCCTTCAGAGATAGGGTGATAGGTCTTAGAGATCAATGCCTTACGCGTAATAAATTTCCAAAAGTGTT  
ATTCCTTCATGATGA  
+  
FFFFFFFFFFFFFFFFFFFFFFFFFFFFFFFFFFFFFFFFFFFFFFFFFFFFFFFFFFFFFFFFFFFF,FFFF  
FFFFFFFFFFFF:FFFFFFFFFFFFFFFFFFFFFFFFFFFFFFFFFFFFFFFFFFFFFFFFFFFFFFFFFFFFF  
FFFFFFFFFFFFFFFFFFFF  
@A01056:60:HMTK7DSXY:1:2344:30228:16830 1:N:0:TCCTTAGC+ACTCGATT  
ATGTACAATGCGATAATTGACGGGAAGGACAAGTATAGGTATGGTGAGGTCTCTTTCACCTCCTTCAG  
AGATAGGGTGATAGGTCTTAGAGATCAATGCCTTACGCGTAATAAATTTCCAAAAGTGTTATTCCTTC  
ATGATGAAGTGCACC  
+  
FFFFFFF,FFFFFFFFFFFFFFFFFFFFFFFFFFFFFFFFFFFFFFFFFFFFFFFFFFFFFFFFFFFF,FFFFFFFFFFFF  
FFFFFFFFFFFFFFFFFFFFFFFFFFFFFFFFFFFFFFFFFFFFFFFFFFFFFFFFFFFFFFFFFFFFFFFFFFFF  
FFFFFFFFFFFFFFFFFFFF  
@A01056:60:HMTK7DSXY:1:2552:32823:21512 2:N:0:TCCTTAGC+ACTCGATT  
GTGAGGTCTCTTTCACCTCCTTCAGAGATAGGGTGATAGGTCTTAGAGATCAATGCCTTACGCGTAAT  
AAATTTCCAAAAGTGTTATTCCTTCATGATGAAGTGCCTTACCTTACGCCCTTTGATATTGCTTTTTT  
GTTTGAAACAATTCC  
+  
FFFFFFFFFFFFFFF:FFFFFFFFFFFFFFFFFFFFFFFFFFFFF:FFFF:FFFFFFFFFFFFFFFFFFFFFFFFFFFF  
FFFFFFFFFFFFFFFFFFFFFFFFFFFFFFFFFFFFFFFFFFFFFFFFFFFFFFFFFFFFF:FFFFFFFFFFFFFFFFFFFFFFFFFFFFFFFFFFFF  
FF:FFFFFFFFFFFFFFF  
@A01056:60:HMTK7DSXY:1:2552:32832:21496 2:N:0:TCCTTAGC+ACTCGATT  
GTGAGGTCTCTTTCACCTCCTTCAGAGATAGGGTGATAGGTCTTAGAGATCAATGCCTTACGCGTAAT  
AAATTTCCAAAAGTGTTATTCCTTCATGATGAAGTGCCTTACCTTACGCCCTTTGATATTGCTTTTTT  
GTTTGAAACAATTCC  
+  
FFFF:FFFFFFFFFFFFFFF:FFFFFFFFF:FFFFFFFFFFFFFFFFF:FFFFFFFFFFFFFFFFFFFFFFFFF:FFF  
FFFFFFFFFFFFFFFFFFFFFFFFFFFFFFFFFFFFFFFFFFFFFFFFFFFFFFFFFFFFF:FFFFFF:FFFFFFFFFFFFF  
FF,FFFFFFF:FFFF  
@A01056:60:HMTK7DSXY:1:2459:21847:22639 2:N:0:TCCTTAGC+ACTCGATT  
GTGAGGTCTCTTTCACCTCCTTCAGAGATAGGGTGATAGGTCTTAGAGATCAATGCCTTACGCGTAAT  
AAATTTCCAAAAGTGTTATTCCTTCATGATGAAGTGCCTTACCTTACGCCCTTTGATATTGCTTTTTT  
GTTTGAAACAATTCC

+  
FFFFFFFFFFFFFFFFFFFFFFFFFFFFFFFFFFFFFFFFFFFFFFFFFFFFFFFFFFFFFFFFFFFFFFFF  
FFFFFFFFFFFFFFFFFFFFFFFFFFFFFFFFFFFFFFFFFFFFFFFFFFFFFFFFFFFFFFFFFFFFFFFF  
FFFFFFFFFFFF:FFF:  
@A01056:60:HMTK7DSXY:1:1575:18069:4914 2:N:0:TCCTTAGC+ACTCGATT  
GTCTCTTTCACCTCCTTCAGAGATAGGGTGATAGGTCTTAGAGATCAATGCCTTACGCGTAATAAATT  
TCCAAAAGTGTTATTCCTTCATGATGAACTGCACTTCCTTAGCCCCTTTGATATTGCTTTTTTGT  
AAACAATTCCAGAAA  
+  
FFFFFFFFFFFFFFFFFFFFFFFFFFFFFFFFFFFFFFFFFFFFFFFFFFFFFFFFFFFFFFFFFFFFFFFF  
FFFFFFFFFFFFFFFFFFFFFFFFFFFFFFFFFFFFFFFFFFFFFFFFFFFFFFFFFFFFFFFFFFFFFFFF  
FFFFFFFFFFFF:FF  
@A01056:60:HMTK7DSXY:1:1542:19461:13025 1:N:0:TCCTTAGC+ACTCGATT  
AGACGTGTGCTCTTCCGATCTTAGAGATCAATGCCTTACGCGTAATAAATTTCCAAAAGTGTTATTC  
TTCATGATGAACTGCACTTCCTTAGCCCCTTTGATATTGCTTTTTTGTGTTGAAACAATTCCAGAAATA  
GACAGAGTTATTGCG  
+  
FFFFFFFFFFFFFFFFFFFF,FFFFFFFFFFFFFFFFFFFFFFFFFFFFFFFFFFFFFFFFFFFFFFFF  
FFFFFFFFFFFF:FFFF:FFFFFFFFFFFFFFFFFFFFFFFFFFFFFFFFFFFFFFFFFFFFFFFF  
FFFFFFFFFFFFFFFF  
@A01056:60:HMTK7DSXY:1:1575:18069:4914 1:N:0:TCCTTAGC+ACTCGATT  
GAGATAGGGTGATAGGTCTTAGAGATCAATGCCTTACGCGTAATAAATTTCCAAAAGTGTTATTCCT  
CATGATGAACTGCACTTCCTTAGCCCCTTTGATATTGCTTTTTTGTGTTGAAACAATTCCAGAAATAGA  
CAGAGTTATTGCGAC  
+  
FFFFFFFFFFFFFFFFFFFFFFFFFFFFFFFFFFFFFFFFFFFFFFFFFFFFFFFFFFFFFFFFFFFFFFFF  
FFFFFFFFFFFF:FF,FFFF:FFFFFFFFFFFFFFFFFFFFFFFFFFFFFFFFFFFFFFFFFFFFFFFF  
FFFFFFFFFFFFFFFF  
@A01056:60:HMTK7DSXY:1:1643:13331:22451 1:N:0:TCCTTAGC+ACTCGATT  
GAGATAGGGTGATAGGTCTTAGAGATCAATGCCTTACGCGTAATAAATTTCCAAAAGTGTTATTCCT  
CATGATGAACTGCACTTCCTTAGCCCCTTTGATATTGCTTTTTTGTGTTGAAACAATTCCAGAAATAGA  
CAGAGTTATTGCGAC  
+  
FFFFFFFFFFFFFFFFFFFFFFFFFFFFFFFFFFFFFFFFFFFFFFFFFFFFFFFFFFFFFFFFFFFFFFFF  
FFFFFFFFFFFFFFFFFFFFFFFFFFFFFFFFFFFFFFFFFFFFFFFFFFFFFFFFFFFFFFFFFFFFFFFF  
FFFFFFFFFFFFFFFF  
@A01056:60:HMTK7DSXY:1:1542:19461:13025 2:N:0:TCCTTAGC+ACTCGATT  
TAGAGATCAATGCCTTACGCGTAATAAATTTCCAAAAGTGTTATTCCTTCATGATGAACTGCACTTC  
TTAGCCCCTTTGATATTGCTTTTTTGTGTTGAAACAATTCCAGAAATAGACAGAGTTATTGCGAGATCG  
GAAGAGCGTCGTGTA  
+  
FFFFFFFFFFFFFFFFFFFFFFFFFFFFFFFFFFFFFFFFFFFFFFFFFFFFFFFFFFFFFFFFFFFFFFFF  
FFFFFFFFFFFFFFFFFFFFFFFFFFFFFFFFFFFFFFFFFFFFFFFFFFFFFFFFFFFFFFFFFFFFFFFF  
FF:FFFFFFFF,F  
@A01056:60:HMTK7DSXY:1:2552:32832:21496 1:N:0:TCCTTAGC+ACTCGATT  
TCCAAAAGTGTTATTCCTTCATGATGAACTGCACTTCCTTAGCCCCTTTGATATTGCTTTTTTGT  
AAACAATTCCAGAAATAGACAGAGTTATTGCGACCACTATATTTCCGATTGAATTGTTATTTGGGGAC  
AAGGTCTCTAAGGAG  
+  
FFFFFFFFFFFFF:FFFFFFFFFFFFFFFFFFFFFFFF,FFFFFFF:FFFFFFFFF:FFFFFFFFFFFFFFFF  
FFFFFFFFFFFFF:,FF:FFFFFFF:FFFFFFF:F:FFFFFFF:FFFFFFFFFFFFFFFF  
FFFFFFFFFFFFFFFF  
@A01056:60:HMTK7DSXY:1:2552:32823:21512 1:N:0:TCCTTAGC+ACTCGATT  
TCCAAAAGTGTTATTCCTTCATGATGAACTGCACTTCCTTAGCCCCTTTGATATTGCTTTTTTGT



$+$ 

+

+

+

+

+

 $+$ 

```

FFFFFFFF:FFFFFFFFFFFFFFFFFFFFFFFFFFFFFFFF:FFFFFFFFFFFFFFFFFFFFFFFF:;FFFFFF:FFFFFFFFFFFF

```

F,FFFFFFFFFFFFFFFF,FFFF:FFFFFF,FFFFFFFFFFFFFFFFFFFFFFFFFFFFFFFF,FFFFFF  
FFFFFFFF,FF,FFF

@A01056:60:HMTK7DSXY:1:2613:31195:12117 2:N:0:TCCTTAGC+ACTCGATT  
GGTCTCTAAGGAGCCCAGGGTTTACACCTATAAAGTTCATGGATCCTCCTTTTCATTTTACCCTGACG  
GTGTGGCCTCTGAATGTTATGAACAAAATTTGGCAAATTCAAAATGGCCTGTCACCTGCAGTGGCATT  
CAATGGGCTAATAGG

+  
:FFFFFFFF:FFFFFFFFFFFFFFFFFFFFFFFF,F,FFFFFFFF,FFFFFFFFFFFF:,FFF:,FFFFFF:FFF  
F:FFFFFF:F,FFFF,F:F:F:FFF:F,FFFFFF,FF:FF:FFFFFFFF,FFFFFFFFFF,FFFF,F  
FFFF:FF,:F:FFF

@A01056:60:HMTK7DSXY:1:1632:20401:8328 1:N:0:TCCTTAGC+ACTCGATT  
CTCTAAGGAGCCCAGGGTTTACACCTATAAAGTTCATGGATCCTCCTTTTCATTTTACCCTGACGGTG  
TGGCCTCTGAATGTTATGAACAAAATTTGGCAAATTCAAAATGGCCTTTCACCTGCAGTGGCATTCAA  
TGGGCTAATAGGAAG

+  
FFFFFFFFFFFFFFFFFFFFFFFFFFFFFFFFFFFFFFFFFFFFFFFFFFFFFFFFFFFFFFFF  
FFFFFFFFFFFFFFFFFFFFFFFFFFFFFFFFFFFFFFFFFFFFFFFFFFFFFFFFFFFFFFFF  
FFFFFFFFFFFFFFFF

@A01056:60:HMTK7DSXY:1:1174:22209:34006 2:N:0:TCCTTAGC+ACTCGATT  
CTAAGGAGCCCAGGGTTTACACCTATAAAGTTCATGGATCCTCCTTTTCATTTTACCCTGACGGTGTG  
GCCTCTGAATGTTATGAACAAAATTTGGCAAATTCAAAATGGCCTTTCACCTGCAGTGGCATTCAATG  
GGCTAATAGGAAGAT

+  
FFFFFFFFFFFFFFFFFFFFFFFFFFFFFFFFFFFFFFFFFFFFFFFFFFFFFFFFFFFFFFFF  
FFFFFFFFFFFF,FFFFFFFFFFFFFFFFFFFFFFFFFFFFFFFFFFFFFFFFFFFFFFFF  
FFFF: :FFFFFFFF

@A01056:60:HMTK7DSXY:1:1632:15275:14606 2:N:0:TCCTTAGC+ACTCGATT  
CTAAGGAGCCCAGGGTTTACACCTATAAAGTTCATGGATCCTCCTTTTCATTTTACCCTGACGGTGTG  
GCCTCTGAATGTTATGAACAAAATTTGGCAAATTCAAAATGGCCTTTCACCTGCAGTGGCATTCAATG  
GGCAGATCGGAAGAG

+  
FFFFFFFFFFFFFFFFFFFFFFFFFFFFFFFFFFFFFFFFFFFFFFFFFFFFFFFFFFFFFFFF  
FFFFFFFFFFFFFFFFFFFFFFFFFFFFFFFFFFFFFFFFFFFFFFFFFFFFFFFFFFFFFFFF  
FFFFFFF,FFFFFF

@A01056:60:HMTK7DSXY:1:1632:16387:16063 2:N:0:TCCTTAGC+ACTCGATT  
CTAAGGAGCCCAGGGTTTACACCTATAAAGTTCATGGATCCTCCTTTTCATTTTACCCTGACGGTGTG  
GCCTCTGAATGTTATGAACAAAATTTGGCAAATTCAAAATGGCCTTTCACCTGCAGTGGCATTCAATG  
GGCAGATCGGAAGAG

+  
FFFFFFFFFFF,F:FFFF,FFF:F:F,FFF:FFFF::FFFF:FFFF::FFFFFFFFF:FFFF:::FF  
FFFFFFFFFFFFFFFFFFFFFFFFFFFF,F,:FFFF:FFFF:F:FF:FFFF:,FFFFFFFFFF:FFF,  
FFFFFFF:FFFFFF

@A01056:60:HMTK7DSXY:1:2268:7229:29512 2:N:0:TCCTTAGC+ACTCGATT  
CTAAGGAGCCCAGGGTTTACACCTATAAAGTTCATGGATCCTCCTTTTCATTTTACCCTGACGGTGTG  
GCCTCTGAATGGTATGAACAAAATTTGGCAAATTCAAAATGGCCTTTCACCTGCAGTGGCATTCAATG  
GGCTAATAGGAAGAT

+  
FFFFFFFFFFFFFFFFFFFFFFFFFFFFFFFFFFFFFFFFFFFFFFFFFFFFFFFFFFFFFFFF  
FFFFFFFFFFFF,FFFFFFFFFFFFFFFFFFFFFFFFFFFFFFFFFFFFFFFF:FFFF,FFFFFFFFFF::F  
FFFF:F,FFFFFF,:

@A01056:60:HMTK7DSXY:1:1174:22209:34006 1:N:0:TCCTTAGC+ACTCGATT  
GGAGCCCAGGGTTTACACCTATAAAGTTCATGGATCCTCCTTTTCATTTTACCCTGACGGTGTGGCCT  
CTGAATGTTATGAACAAAATTTGGCAAATTCAAAATGGCCTTTCACCTGCAGTGGCATTCAATGGGCT  
AATAGGAAGATAAGG

+  
FFFFFFFFFFFFFFFF:FFFFFFFFFFFFFFFFFFFFFFFFFFFFFFFFFFFFFFFFFFFFFFFF  
FFFFFFFFFFFFFFFFFFFFFFFFFFFFFFFFFFFFFFFFFFFFFFFFFFFFFFFFFFFFFFFF  
FFFFFFFFFFFFFFFF  
@A01056:60:HMTK7DSXY:1:2268:7229:29512 1:N:0:TCCTTAGC+ACTCGATT  
GGAGCCCAGGGTTTACACCTATAAAGTTCATGGATCCTCCTTTTCATTTTACCCTGACGGTGTGGCCT  
CTGAATGCTATGAACAAAATTTGGCAAATTCAAAATGGCCTTTCACCTGCAGTGGCATTCAATGGGCT  
AATAGGAAGATAAGG  
+  
FFFFFFFFFFFFFFFFFFFFFFFFFFFFFFFFFFFFFFFFFFFFFFFFFFFFFFFFFFFFFFFF  
FFFFFFF,FFFFFFFFFFFFFFFFFFFFFFFFFFFFFFFFFFFFFFFFFFFFFFFFFFFFFFFF  
FFFFFFFFFFFFFFFF  
@A01056:60:HMTK7DSXY:1:2260:24849:14716 2:N:0:TCCTTAGC+ACTCGATT  
TGTTTTTTCGTTTGACAGGGGTAGGGCCTGTAATGAGTTTAACCATTTTCGACAAACCAAGTTGCCTGC  
TCGAGAGGAAATGCGTCTTTTGACAAAAGGTTTGATTCTGCAGTCATCAATCGAAGCACAGTTTCC  
TCTCTTAGCACTTAC  
+  
FFFFFFFFFFFFFFFFFFFFFFFFFFFFFFFFFFFFFFFFFFFFFFFFFFFFFFFFFFFFFFFF:FFFFFFFFFFFFFFF  
FFFFFFFFFFFF:FFF:FFFFFFFFFFFFFFFFFFFFFFFFFFFFFFFFFFFFFFFFFFFF, :FFFFFFFFFFFF  
FFFFFFFFFFFFFFFF  
@A01056:60:HMTK7DSXY:1:2260:24849:14716 1:N:0:TCCTTAGC+ACTCGATT  
GTAGGGCCTGTAATGAGTTTAACCATTTTCGACAAACCAAGTTGCCTGCTCGCAGAGGAAATGCGTCTT  
TTGACAAAAGGTTTGATTCTGCAGTCATCAATCGAAGCACAGTTTCTCTCTTAGCACTTACATGGC  
TTGCCTCAAACTGC  
+  
FFFFFFFFFFFFFFFFFFFFFFFFFFFFFFFFFFFFFFFFFFFFFFFFFFFFFFFFFFFFFFFF:FFFFFFFFFFFFFFF  
FFFFFFFFFFFFFFFFFFFFFFFFFFFFFFFFFFFFFFFFFFFFFFFFFFFFFFFFFFFFFFFFFFFFFFFFFFFFFFFF  
FFFFFFFFFFFFFFFF  
@A01056:60:HMTK7DSXY:1:1354:26413:10379 1:N:0:TCCTTAGC+ACTCGATT  
GATCTGTTTAACCATTTTCGACAAACCAAGTTGCCTGCTCGCAGAGGAAATGCGTCTTTTGACAAAAG  
GTTTGATTCTGCAGTCATCAATCGAAGCACAGTTTCTCTCTTAGCACTTACATGGCTTGCCTCAAAA  
CTGCGAATGCAGCCG  
+  
FFFFFFFFFFFFFFFFFFFF:FFFFFF:FFFFFFFF:FFFFFFFFFFFFFFFFFFFFFFFFFFFFFFFFFFFFFFFF  
FFFFFFFFFFFFFFFFFFFFFFFFFFFFFFFFFFFFFFFFFFFFFFFFFFFFFFFFFFFFFFFFFFFFFFFFFFFFFFFF  
FFFFFFFFFFFFFFFF  
@A01056:60:HMTK7DSXY:1:1354:26413:10379 2:N:0:TCCTTAGC+ACTCGATT  
GTTTAACCATTTTCGACAAACCAAGTTGCCTGCTCGCAGAGGAAATGCGTCTTTTGACAAAAGGTTTG  
ATTCTGCAGTCATCAATCGAAGCACAGTTTCTCTCTTAGCACTTACATGGCTTGCCTCAAACTGCG  
AATGCAGCCGAGATC  
+  
FFFFFFFFFFFFFFFFFFFFFFFFFFFFFFFFFFFFFFFFFFFFFFFFFFFFFFFFFFFFFFFF:FFFFFFFFFFFFF,FFFFFFFFFFFFF  
F:FFFFFFFFFFFFFFFFFFFFFFFFFFFFFFFFFFFFFFFFFFFFFFFFFFFFFFFFFFFFFFFF:FFFFF:FFFFFFFFFFFFF  
FFFFFFFFFFFF:FFF  
@A01056:60:HMTK7DSXY:1:2572:23945:35790 2:N:0:TCCTTAGC+ACTCGATT  
TTAACCATTTTCGACAAACCAAGTTGCCTGCTCGCAGAGGAAATGCGTCTTTTGACAAAAGGTTTGAT  
TCTGCAGTCATCAATCGAAGCACAGTTTCTCTCTTAGCACTTACATGGCTTGCCTCAAACTGCGAA  
TGCAGCCTCAGCAGT  
+  
FFFFFFFFFFFFFFFFFFFFFFFFFFFFFFFFFFFFFFFFFFFFFFFFFFFFFFFFFFFFFFFF,   
FFFFFFFFFFFFFFFFFFFF,FFFFFFFFFFFFFFFFFFFFFFFFFFFFFFFFFFFFFFFFFFFF  
FFFFFFFFFFFFFFFF  
@A01056:60:HMTK7DSXY:1:2572:23945:35790 1:N:0:TCCTTAGC+ACTCGATT  
TGCAGTCATCAATCGAAGCACAGTTTCTCTCTTAGCACTTACATGGCTTGCCTCAAACTGCGAATG





$+$ 

@A01056:60:HMTK7DSXY:1:1165:4246:1767 2:N:0:TCCTTAGC+ACTCGATT

 $+$ 

@A01056:60:HMTK7DSXY:1:1173:28203:23970 1:N:0:TCCTTAGC+ACTCGATT

+

@A01056:60:HMTK7DSXY:1:1173:28203:23970 2:N:0:TCCTTAGC+ACTCGATT

+

@A01056:60:HMTK7DSXY:1:2366:7139:15828 2:N:0:TCCTTAGC+ACTCGATT

+

@A01056:60:HMTK7DSXY:1:2428:25283:17190 1:N:0:TCCTTAGC+ACTCGATT

+

@A01056:60:HMTK7DSXY:1:1165:4246:1767 1:N:0:TCCTTAGC+ACTCGATT

+

[illegible]

FFFFFFFFFFFFFFFFFFFFFFFFFFFFFFFFFFFFFFFFFFFFFFFFFFFFFFFFFFFFFFFFFFFFFFFF  
FFFFFFFFFFFFFFFF

@A01056:60:HMTK7DSXY:1:1213:1669:13557 2:N:0:TCCTTAGC+ACTCGATT  
CGACTTTGATGTGTCGATTCTCCAATGGGTCAAAGACAAATTTGTCAAGTTATGCCTCACTTCATTG  
CTGCCAGCTTCTTTGAGCCAACAGAGTTTCACCTCAACATGCGAAAATTATTGAATGATCTGGCCACC  
AAGGGGATAGAGGTC

+

FFF:FFFFFFFFFFFFFFFFFFFFFFFFFFFFFFFFFFFFFFFFFFFFFFFFFFFFFFFFFFFFFFFF  
FFFFFFFFFFFFFFFFFFFFFFFFFFFFFFFFFFFFFFFFFFFFFFFFFFFFFFFFFFFFFFFF:FFFFFFF,FFFFFFFFFFFFFFFF:FFFFFFFFFFFF,FFF:  
FF:FFFFFFFFFFFF

@A01056:60:HMTK7DSXY:1:2511:26133:6856 2:N:0:TCCTTAGC+ACTCGATT  
CAAATTTTGTCAAGTTATGCCTCACTTCATTGCTGCCAGCTTCTTTGAGCCAACAGAGTTTCACCTCA  
ACATGCGAAAATTATTGAATGATCTGGCCACCAAGGGGATAGAGGTCCCACTTCCGTCATTGTGTGA  
GACAATGTCGATTTT

+

FFFFFFFFFFFFFFFFFFFFFFFFFFFFFFFFFFFFFFFFFFFFFFFFFFFFFFFFFFFFFFFFFFFFFFFF  
FFFFFFFFFFFFFFFFFFFFFFFFFFFFFFFFFFFFFFFFFFFFFFFFFFFFFFFFFFFFFFFF:FF:FFFFFFFFFFFFFFFF  
FF:FFFFFFFFFFFF

@A01056:60:HMTK7DSXY:1:1213:1669:13557 1:N:0:TCCTTAGC+ACTCGATT  
GAATGATCTGGCCACCAAGGGGATAGAGGTCCCACTTCCGTCATTGTGTGTTAGACAATGTCGATTTTA  
TTGAAACTAGGTTCCATGCCAGGATGTTTGACATCGCGCAGGCTATTGGGGTCAACTTGAAGTTGCTC  
GGGCGCAGATTTGAC

+

FFFFFFF,:FFFFFF,:F:FFFFFFFFFFFFFFFFFFFFFFFFFFFFFFFFFFFFFFFFFFFFFFFF  
FFFFFFFFFFFFFFFFFFFFFFFFFFFFFFFFFFFFFFFFFFFFFFFFFFFFFFFFFFFFFFFFFFFFFFFF  
FFFFFFFFFFFFFFFF

@A01056:60:HMTK7DSXY:1:2366:7139:15828 1:N:0:TCCTTAGC+ACTCGATT  
GGGGATAGAGGTCCCACTTCCGTCATTGTGTGTTAGACAATGTCGATTTTATTGAACTAGGTTCCATG  
CCAGGATGTTTGACATCGCGCAGGCTATTGGGGTCAACTTGAAGTTGCTCGGGCGCAGATTTGACTAC  
GATACTGAAAGTGAG

+

FFFFFFFFFFFFFFFFFFFFFFFFFFFFFFFFFFFFFFFFFFFFFFFFFFFFFFFFFFFFFFFFFFFFFFFF  
FFFFFFFFFFFFFFFFFFFFFFFFFFFFFFFFFFFFFFFFFFFFFFFFFFFFFFFFFFFFFFFFFFFFFFFF  
FFFFFFFFFFFFFFFF

@A01056:60:HMTK7DSXY:1:2511:26133:6856 1:N:0:TCCTTAGC+ACTCGATT  
CAATGTCGATTTTATTGAACTAGGTTCCATGCCAGGATGTTTGACATCGCGCAGGCTATTGGGGTCA  
ACTTGAAGTTGCTCGGGCGCAGATTTGACTACGATACTGAAAGTGAGAAATATTTCTCAGAAAATGGT  
TATGTCTTCATGCCG

+

FFFFFFFFFFFFFFFFFFFFFFFFFFFFFFFFFFFFFFFFFFFFFFFFFFFFFFFFFFFFFFFFFFFFFFFF  
FFFFFFFFFFFFFFFFFFFFFFFFFFFFFFFFFFFFFFFFFFFFFFFFFFFFFFFFFFFFFFFFFFFFFFFF  
FFFFFFFFFFFFFFFF

@A01056:60:HMTK7DSXY:1:1252:1380:15812 2:N:0:TCCTTAGC+ACTCGATT  
ATTTTATTGAACTAGGTTCCATGCCAGGATGTTTGACATCGCGCAGGCTATTGGGGTCAACTGAA  
TTGCTCGGGCGCAGATTTGACTACGATACTGAAAGTGAGAAATATTTCTCAGAAAATGGTTATGTCTT  
CATGCCTTCAAATC

+

FFFFFFFFFFFF:FFFFFFFFFFFFFFFFFFFFFFFFFFFFFFFFFFFFFFFFFFFFFFFF:F:FFFFFFFFFFFFFFFF  
FFFFFFFFFFFFFFFFFFFFFFFFFFFFFFFFFFFFFFFFFFFFFFFFFFFFFFFFFFFFFFFF:FF:FFFFFFFFFFFFFFFF  
FFFFFFFFFFFFFFFF

@A01056:60:HMTK7DSXY:1:2674:29451:28260 2:N:0:TCCTTAGC+ACTCGATT  
CAGGATGTTTGACATCGCGCAGGCTATTGGGGTCAACTTGAAGTTGCTCGGGCGCAGATTTGACTACG  
ATACTGAAAGTGAGAAATATTTCTCAGAAAATGGTTATGTCTTCATGCCTTCAAATCAAATCCAGAC  
AGGAATTGGATTCTG

```

FFFFFFFFFFFFFFFFFFFFFFFF,FFFFFFFFFFFFFFFFFFFFFFFFFFFFFFFF
FFFFFFFFFFFFFFFFFFFFFFFF:FFFFFFFFFFFFFFFFFFFFFFFFFFFFFFFF
FFFF:FFFFFFFF

```

[illegible][illegible][illegible][illegible][illegible][illegible]

@A01056:60:HMTK7D5XY:1:1661:8223:28166 2:N:0:TCCTTAGC+ACTCGATT  
GTCTTCATGCCTTCAAAATCAAATCCAGACAGGAATTGGATTCTGAACTCTGGCTCTTTAAAGATTGA

CTACTTCAAATTGGTCAAAGTCAGGAGATTCAGATTGAGGAGGGATTTTCTGGATCCCATATCTAAAG  
GTGATTCTCCCAGGA

+

FFFFFFFFFFFFFFFFFFFFFFFFFFFFFFFFFFFFFFFFFFFFFFFFFFFFFFFFFFFFFFFFFFFFFFFF  
FFFFFFFFFFFFFFFFFFFFFFFFFFFFFFFFFFFFFFFFFFFFFFFFFFFFFFFFFFFFFFFFFFFFFFFF:FFFFFFFFFFFF  
FFFFFFFFFFFF:FFFFF

@A01056:60:HMTK7DSXY:1:2254:12418:16611 2:N:0:TCCTTAGC+ACTCGATT  
ATTGGATTCTGAACCTCTGGCTCTTTAAAGATTGACTACTTCAAATTGGTCAAAGTCAGGAGATTCAGA  
TTGAGGAGGGATTTTCTGGATCCCATATCTAAAGGTGATTCTCCCAGGAGGCAACTCTTCTTAGAATC  
AGCCAGTGACCCTAG

+

FFFFFFFFFFFFFFFFFFFFFFFFFFFFFFFFFFFFFFFFFFFFFFFFFFFFFFFFFFFFFFFFFFFFFFFF:FFFFFFFFFFFFFFFF  
FFFFFFFFFFFFFFFFFFFFFFFFFFFFFFFFFFFFFFFFFFFFFFFFFFFFFFFFFFFFFFFFFFFFFFFF:FFFFFFFFFFFF  
FFFFFFFFFFFFFFFF:F

@A01056:60:HMTK7DSXY:1:2254:12418:16611 1:N:0:TCCTTAGC+ACTCGATT  
CTCTGGCTCTTTAAAGATTGACTACTTCAAATTGGTCAAAGTCAGGAGATTCAGATTGAGGAGGGATT  
TTCTGGATCCCATATCTAAAGGTGATTCTCCCAGGAGGCAACTCTTCTTAGAATCAGCCAGTGACCCT  
AGGTCAAACCCTGAG

+

FFFFFFFFFFFFFFFFFFFFFFFFFFFFFFFFFFFFFFFFFFFFFFFFFFFFFFFFFFFFFFFFFFFFFFFF:FFFFFFFFFFFFFFFF  
FFFFFFFFFFFFFFFFFFFFFFFFFFFFFFFFFFFFFFFFFFFFFFFFFFFFFFFFFFFFFFFFFFFFFFFF:FFFFFFFFFFFF  
FFFFFFFFFFFFFFFF

@A01056:60:HMTK7DSXY:1:2205:27950:17080 2:N:0:TCCTTAGC+ACTCGATT  
GACTACTTCAAATTGGTCAAAGTCAGGAGATTCAGATTGAGGAGGGATTTTCTGGATCCCATATCTAA  
AGGTGATTCTCCCAGGAGGCAACTCTTCTTAGAATCAGCCAGTGACCCTAGGTCAAACCCTGAGGTTCC  
CAGGAGTGGTGAAA

+

FFFFFFFFFFFFFFFFFFFFFFFFFFFFFFFFFFFFFFFFFFFFFFFFFFFFFFFFFFFFFFFFFFFFFFFF:FFFFFFFFFFFF  
FFFFF:FFFFFFFFFFFFFFFFFFFFFFFFFFFFFFFFFFFFFFFFFFFFFFFFFFFFFFFFFFFFFFFF:FFFFFFFFFFFFFFFF  
F:FFFFFFFFFFFFF

@A01056:60:HMTK7DSXY:1:2562:6162:19366 2:N:0:TCCTTAGC+ACTCGATT  
AATTGGTCAAAGTCAGGAGATTCAGATTGAGGAGGGATTTTCTGGATCCCATATCTAAAGGTGATTCT  
CCCAGGAGGCAACTCTTCTTAGAATCAGCCAGTGACCCTAGGTCAAACCCTGAGGTTCCCAGGAGTGG  
TGAAATTAGAGAGGC

+

FFFFFFF:FF:FFFFFFFFFFFFFFFFFFFFFFFFFFFFFFFFFFFFFFFFFFFFFFFFFFFFFFFF:FFFFFF:FFFFFFFFFFFF  
FFFFFFFFFFFFFFFFFFFFFFFFFFFFFFFFFFFFFFFFFFFFFFFFFFFFFFFFFFFFFFFF:FFFF:FF:FFFFFF:F:FFFFFFF,FFFFFFFF  
:FFF:F,FFFFFFFF

@A01056:60:HMTK7DSXY:1:2423:19913:15687 2:N:0:TCCTTAGC+ACTCGATT  
AATTGGTCAAAGTCAGGAGATTCAGATTGAGGAGGGATTTTCTGGATCCCATATCTAAAGGTGATTCT  
CCCAGGAGGCAACTCTTCTTAGAATCAGCCAGTGACCCTAGGTCAAACCCTGAGGTTCCCAGGAGTGG  
TGAAATTAGAGAGGC

+

FFFFFFFFFFFFFFFFFFFFFFFFFFFFFFFFFFFFFFFFFFFFFFFFFFFFFFFFFFFFFFFFFFFFFFFF  
FFFFFFFFFFFFFFFFFFFFFFFFFFFFFFFFFFFFFFFFFFFFFFFFFFFFFFFFFFFFFFFF:FFFF:FFFFFFFFFFFFFFFF  
,FFF,F:FFFF:FF

@A01056:60:HMTK7DSXY:1:1302:5620:18490 2:N:0:TCCTTAGC+ACTCGATT  
GGAGATTCAGATTGAGGAGGGATTTTCTGGATCCCATATCTAAAGGTGATTCTCCCAGGAGGCAACTC  
TTCTTAGAATCAGCCAGTGACCCTAGGTCAAACCCTGAGGTTCCCAGGAGTGGTGAAATTAGAGAGGC  
AGAACCATTGGTCAA

+

FFFFFFFFFFFFFFFFFFFFFFFFFFFFFFFFFFFFFFFFFFFFFFFFFFFFFFFFFFFFFFFF:FF:FFFFFFFFFFFFFFFF  
FFF:,FFFFFFFFFFFF:FFFFFFFFFFFFFFFFFFFFFFFFFFFFFFFFFFFFFFFF:FFFFFFFFFFFFFFFF:FFFFF  
FFFFFFFFF,FFFFFF

@A01056:60:HMTK7DSXY:1:2205:27950:17080 1:N:0:TCCTTAGC+ACTCGATT  
GAGATTGAGATTGAGGAGGGATTTTCTGGATCCCATATCTAAAGGTGATTCTCCCAGGAGGCAACTCT  
TCTTAGAATCAGCCAGTGACCCTAGGTCAAACCCTGAGGTTCCCAGGAGTGGTGAAATTAGAGAGGCA  
GAACCATTGGTCAAT

[illegible]

CTGGATCCCATATCTAAAGGTGATTCTCCCAGGAGGCAACTCTTCTTAGAATCAGCCAGTGACCCTAG  
GTCAAACCTGAGGTTCCAGGAGTGGTGAAATTAGAGAGGCAGAACCATTGGTCAATGACGAGAGCT  
GCCAGTCACCAAGAG

[illegible]

GATCCCATATCTAAAGGTGATTCTCCAGGAGGCAACTCTTCTTAGAATCAGCCAGTGACCCTAGGTC  
AAACCCTGAGGTTCCCAGGAGTGGTGAAATTAGAGAGGCAGAACCATTGGTCAATGACGAGAGCTGCC  
AGTCACCAAGAGAGC

[illegible]

CCATATCTAAAGGTGATTCTCCCAGGAGGCAACTCTTCTTAGAATCAGCCAGTGACCCTAGGTCAAAC  
CCTGAGGTTCCCAGGAGTGGTGAATTAGAGAGGCAGAACCATTGGTCAATGACGAGAGCTGCCAGTC  
ACCAAGAGAGCTTTG

```

FFFFFFFF:FF:FFFFFFFFFFFFFFFFFFFFFFFFFFFFFFFF:FFFFFFFFFFFF:FFFFFFFFFFFFFFFF
FFFFFFFF:FFFFFF,F:FFFFFFFFFFFFFFFFFFFFFFFF:FFFFFFFFFFFFFFFFFFFFFFFFFFFFFFFF
FFFFFFFFFFFFFFFF

```

GAGGCAACTCTTCTTAGAATCAGCCAGTGACCCTAGGTCAAACCCTGAGGTTCCAGGAGTGGTGAAA  
TTAGAGAGGCAGAACCATTGGTCAATGACGAGAGCTGCCAGTCACCAAGAGAGCTTTGTGTGCAAATG  
TCCACAGAGGACGGC

[illegible]

GAGGCAACTCTTCTTAGAATCAGCCAGTGACCCTAGGTCAAACCCTGAGGTTCCAGGAGTGGTGAAA  
TTAGAGAGGCAGAACCATTGGTCAATGACGAGAGCTGCCAGTCACCAAGAGAGCTTTGTGTGCAAATG  
TCCACAGAGGACGGC

[illegible]

CCTAGGTCAAACCTGAGGTTCCAGGAGTGGTGAAATTAGAGAGGCAGAACCATTGGTCAATGACGA  
GAGCTGCCAGTACCAAGAGAGCTTTGTGTGCAAATGTCCACAGAGGACGGCCAAGGTTTCGAAGTT  
CAATTC AATTGATT

[illegible]

FFFFFFFFFFFFFFFFFFFFFFFFFFFFFFFFFFFFFFFFFFFFFFFFFFFFFFFFFFFFFFFFFFFFFFFF  
FFFFFFFFFFFFFFFF

@A01056:60:HMTK7DSXY:1:1616:5141:5635 2:N:0:TCCTTAGC+ACTCGATT  
GTGAAATTAGAGAGGCAGAACCATTGGTCAATGACGAGAGCTGCCAGTCACCAAGAGAGCTTTGTGTG  
CAAATGTCCACAGAGGACGGCCAAGGTTTCGAAGGTTCAATTCCAATTGATTTGATCAATTGTTTTGA  
ACCAGAAGAAGTCAA

+

FFFFFFFFFFFFFFFFFFFFFFFFFFFFFFFFFFFFFFFFFFFFFFFFFFFFFFFFFFFFFFFFFFFFFFFF  
FFFFFFFFFFFFFFFFFFFFFFFFFFFFFFFFFFFFFFFFFFFFFFFFFFFFFFFFFFFFFFFFFFFFFFFF  
FFFFFFFFFFFF:FFFF

@A01056:60:HMTK7DSXY:1:1103:13304:26130 2:N:0:TCCTTAGC+ACTCGATT  
GTGAAATTAGAGAGGCAGAACCATTGGTCAATGACGAGAGCTGCCAGTCACCAAGAGAGCTTTGTGTG  
CAAATGTCCACAGAGGACGGCCAAGGTTTCGAAGGTTCAATTCCAATTGATTTGATCAATTGTTTTGA  
ACCAGAAGAAGTCAA

+

F:FF,FFFFFFFFFFFFFFFFFFFFFFFFFFFFFFFFFFFFFFFFFFFFFFFFFFFFFFFFFFFFFFFF  
FFFFFFFFFFFFFFFFFFFFFFFFFFFFFFFFFFFFFFFFFFFFFFFFFFFFFFFFFFFFFFFFFFFFFFFF  
FFFFFFFFFFFFFFFF

@A01056:60:HMTK7DSXY:1:1616:5141:5635 1:N:0:TCCTTAGC+ACTCGATT  
GCTGCCAGTCACCAAGAGAGCTTTGTGTGCAAATGTCCACAGAGGACGGCCAAGGTTTCGAAGGTTCA  
ATTCCAATTGATTTGATCAATTGTTTTGAACCAGAAGAAGTCAAATGCCCAAGAAGAAAGAGGAAGAA  
TGATTGTGTTTTTAG

+

FFFFFFFFFFFFFF:FFFFFFFFFFFFFFFFFFFFFFFFFFFFFFFFFFFFFFFFFFFFFFFFFFFFFFF:FF:FFFFFFFFFFFFFFFF  
FFFFFFFFFFFFFFFFFFFFFFFFFFFFFFFFFFFFFFFFFFFFFFFFFFFFFFFFFFFFFFFFFFFFFFFF  
:FFFFFFFFFFFFFF

@A01056:60:HMTK7DSXY:1:1103:13304:26130 1:N:0:TCCTTAGC+ACTCGATT  
GCTGCCAGTCACCAAGAGAGCTTTGTGTGCAAATGTCCACAGAGGACGGCCAAGGTTTCGAAGGTTCA  
ATTCCAATTGATTTGATCAATTGTTTTGAACCAGAAGAAGTCAAATGCCCAAGAAGAAAGAGGAAGAA  
TGATTGTGTTTTTAG

+

F:FF,FFFFFFF:FFFFF::F:FFFFFFF:FFFFF:FFFFFFFFF::FFFFFFFFF:FF:FFFFF  
FFFFF::FFFF:FFFFFFFFFFFFFFFFF:FFFFFFFFFFFFFFFFF:FFFFFFFFFFFFFFFFF  
FFFFFFFFFFFFFFFF

@A01056:60:HMTK7DSXY:1:1311:22046:5948 1:N:0:TCCTTAGC+ACTCGATT  
TGCCAGTCACCAAGAGAGCTTTGTGTGCAAATGTCCACAGAGGACGGCCAAGGTTTCGAAGGTTCAAT  
TCCAATTGATTTGATCAATTGTTTTGAACCAGAAGAAGTCAAATGCCCAAGAAGAAAGAGGAAGAATG  
ATTGTGTTTTTAGGG

+

FFFFFFFFFFFFFFFFFFFFFFFFFFFFFFFFFFFFFFFFFFFFFFFFFFFFFFFFFFFFFFFFFFFFFFF:FFFFFFFFFFFFFFFF  
FFFFFFFFFFFFFFFFFFFFFFFFF,FFFFFFFFFFFF:FFFFFFFFFFFFFFFFFFFFFFFFFFFFFFFFF  
FFFFFFFFFFFFFFFF

@A01056:60:HMTK7DSXY:1:2151:5755:9142 2:N:0:TCCTTAGC+ACTCGATT  
CACCAAGAGAGCTTTGTGTGCAAATGTCCACAGAGGACGGCCAAGGTTTCGAAGGTTCAATTCCAATT  
GATTTGATCAATTGTTTTGAACCAGAAGAAGTCAAATGCCCAAGAAGAAAGAGGAAGAATGATTGTGT  
TTTTAGGGCTATCTC

+

FFFFFFFFFFFFFFFFFFFFFFFFFFFFFFFFFFFFFFFFFFFFFFFFFFFFFFFFFFFFFFFFFFFFFFF  
FFFFFFFFFFFFFFFFFFFFFFFFFFFFFFFFFFFFFFFFFFFFFFFFFFFFFFFFFFFFFFFFFFFFFFF:FFFFFFFFFFFFFFF,FFFFFFFFFFFFF  
FFFFFFFFFFFFFFFF

@A01056:60:HMTK7DSXY:1:2673:4616:26991 1:N:0:TCCTTAGC+ACTCGATT  
CCACAGAGGACGGCCAAGGTTTCGAAGGTTCAATTCCAATTGATTTGATCAATTGTTTTGAACCAGAA  
GAAGTCAAATGCCCAAGAAGAAAGAGGAAGAATGATTGTGTTTTTAGGGCTATCTCTGCACACTTGGG  
AATTGAAACCCAGGA

+  
FFFFFFFF:FFFFFFFF:FFFFFFFF:FFFFFFFFFFFFFFFFFFFFFFFF:FFFFFFFFFFFF  
FFFFFFFFFFFFFFFFFFFFFFFF:FFFFFFFFFFFFFFFF:FFFFFFFFFFFFFFFFFFFFFFFFFFFFFFFF  
FFFFFFFFFFFFFFFF  
@A01056:60:HMTK7DSXY:1:2151:5755:9142 1:N:0:TCCTTAGC+ACTCGATT  
CAATTGTTTTGAACCAGAAGAAGTCAAATGCCCAAGAAGAAAGAGGAAGAATGATTGTGTTTTTAGGG  
CTATCTCCGCACACTTGGAATTGAAACCCAGGACTTGTTGAATTCCTCGTTAATGAGGATATATCT  
GAAGAACTAATGGAC  
+  
,FFFFFFFFFFFFFFFFFFFFFFFFFFFFFFFF:FFFFFFFFFFFF,FFFFFFFF:FFFFFFFFFFFFFFFF  
FFFFFFFFFFFFFFFFFFFFFFFFFFFFFFFFFFFFFFFFFFFFFFFFFFFFFFFFFFFFFFFFFFFFFFFF  
FFFFFFFFFFFFFFFF  
@A01056:60:HMTK7DSXY:1:1269:13404:23046 2:N:0:TCCTTAGC+ACTCGATT  
TGATTGTGTTTTAGGGCTATCTCTGCACACTTGGAATTGAAACCCAGGACTTGTTGAATTCCTCG  
TTAATGAGGATATATCTGAAGAACTAATGGACTGCATTGATGAAGACAAAGGACTCTCACACGAAATG  
ATTGAAGAGGTGTTA  
+  
FFFFFFFFFFFFFFFFFFFFFFFFFFFFFFFFFFFFFFFF:FFFFFFFFFFFFFFFFFFFFFFFFFFFFFFFF  
FFFFFFFFFFFFFFFFFFFFFFFFFFFFFFFFFFFFFFFFFFFFFFFFFFFFFFFFFFFFFFFFFFFFFFFF:FFF:FF  
FFFFFFFFFFFFFFFF  
@A01056:60:HMTK7DSXY:1:1423:30219:19883 2:N:0:TCCTTAGC+ACTCGATT  
TGAAACCCAGGACTTGTTGAATTCCTCGTTAATGAGGATATATCTGAAGAACTAATGGACTGCATTG  
ATGAAGACAAAGGACTCTCACACGAAATGATTGAAGAGGTGTTAGTCACAAAAGGTCTTTCAATGGTT  
TATACTTCAGACTTC  
+  
FFFFFFFFFFFFFFFFFFFFFFFFFFFFFFFFFFFFFFFFFFFFFFFFFFFFFFFFFFFFFFFFFFFFFFFF  
FFFFFFFF:FFFFFFFFFFFFFFFFFFFFFFFFFFFFFFFFFFFFFFFFFFFFFFFFFFFFFFFFFFFFFFFF  
FFFFFFFFFFFFFFFF  
@A01056:60:HMTK7DSXY:1:2220:6569:18004 2:N:0:TCCTTAGC+ACTCGATT  
CCAGGACTTGTTGAATTCCTCGTTAATGAGGATATATCTGAAGAACTAATGGACTGCATTGATGAAG  
ACAAAGGACTCTCACACGAAATGATTGAAGAGGTGTTAGTCACAAAAGGTCTTTCAATGGTTTATACT  
TCAGACTTCAAAGAG  
+  
FFFFFFF:FFFFFFFFFFFFFFFFFFFFFFFFFFFFFFFFFFFFFFFFFFFFFFFFFFFFFFFFFFFFFFFF,FF  
FFFFFFFFFFFFFFFFFFFFFFFFFFFFFFFF:FFFFFFFFFFFFFFFF:FFFFFFFFFFFFFFFF  
F:F:FFFFFFFF  
@A01056:60:HMTK7DSXY:1:1220:9290:12571 2:N:0:TCCTTAGC+ACTCGATT  
CCAGGACTTGTTGAATTCCTCGTTAATGAGGATATATCTGAAGAACTAATGGACTGCATTGATGAAG  
ACAAAGGACTCTCACACGAAATGATTGAAGAGGTGTTAGTCACAAAAGGTCTTTCAATGGTTTATACT  
TCAGACTTCAAAGAG  
+  
FFFFFFFFFFFFFFFFFFFFFFFFFFFFFFFF:FFFFFFFFFFFFFFFFFFFFFFFFFFFFFFFFFFFFFFFF  
FFFFFFFFFFFFFFFFFFFFFFFFFFFFFFFF:FFFFF,FFFFFFFFFFFFFFFFFFFFFFFFFFFFFFFF  
FFFFFFFFFFFFFFFF  
@A01056:60:HMTK7DSXY:1:1522:6108:10410 2:N:0:TCCTTAGC+ACTCGATT  
TGAATTCCTCGTTAATGAGGATATATCTGAAGAACTAATGGACTGCATTGATGAAGACAAAGGACTC  
TCACACGAAATGATTGAAGAGGTGTTAGTCACAAAAGGTCTTTCAATGGTTTATACTTCAGACTTCAA  
AGAGATGGCAGTCCT  
+  
FFFFFFFFFFFFFFFFFFFFFFFFFFFFFFFF:FFFFFFFFFFFFFFFFFFFFFFFFFFFFFFFF:FFFFFFFF:FFFF  
FFFFFFFFFFFF:FFF:FFFFFFFF:FFFFFFFF:FFF,FFFFFFFF:FFF,F,F::F:F:FFFF:,F  
:,::FFFFFFFF:FF  
@A01056:60:HMTK7DSXY:1:1269:13404:23046 1:N:0:TCCTTAGC+ACTCGATT  
AATGAGGATATATCTGAAGAACTAATGGACTGCATTGATGAAGACAAAGGACTCTCACACGAAATGAT







@A01056:60:HMTK7DSXY:1:2250:24343:20948 1:N:0:TCCTTAGC+ACTCGATT  
TAAGTTGGCAAATCAATGGCGAGAGGTA CTACAGGTCTCTTGAATTCCTTTGATCCGGCCTTCTGCA  
AGAGCATGGTCACTCTTTCAGAGTTGTTCCCTGAGAACTTTTCATCTACTGTTGGACTGAGATTGGGA  
TTTGCTGGTTCAGGA

@A01056:60:HMTK7DSXY:1:1268:5231:30311 1:N:0:TCCTTAGC+ACTCGATT  
TAAGTTGGCAAATCAATGGCGAGAGGTA CTACAGGTCTCTTGAATTCCTTTGATCCGGCCTTCTGCA  
AGAGCATGGTCACTCTTTCAGAGTTGTTCCCTGAGAACTTTTCATCTACTGTTGGACTGAGATTGGGA  
TTTGCTGGTTCAGGA

@A01056:60:HMTK7DSXY:1:1660:2600:31140 2:N:0:TCCTTAGC+ACTCGATT  
GAGCATGGTCACTCTTTCAGAGTTGTTCCCTGAGAACTTTTCATCTACTGTTGGACTGAGATTGGGAT  
TTGCTGGTTCAGGAAAACTCACAAAGTGCTCCAATGGATCAACTACACACCGAGTGTTAAAAGAATG  
TTTATAAGTCCAAGA

@A01056:60:HMTK7DSXY:1:1113:6515:28056 2:N:0:TCCTTAGC+ACTCGATT  
GAGCATGGTCACTCTTTCAGAGTTGTTCCCTGAGAACTTTTCATCTACTGTTGGACTGAGATTGGGAT  
TTGCTGGTTCAGGAAAACTCACAAAGTGCTCCAATGGATCAACTACACACCGAGTGTTAAAAGAATG  
TTTATAAGTCCAAGA

@A01056:60:HMTK7DSXY:1:1113:7337:28072 2:N:0:TCCTTAGC+ACTCGATT  
GAGCATGGTCACTCTTTCAGAGTTGTTCCCTGAGAACTTTTCATCTACTGTTGGACTGAGATTGGGAT  
TTGCTGGTTCAGGAAAACTCACAAAGTGCTCCAATGGATCAACTACACACCGAGTGTTAAAAGAATG  
TTTATAAGTCCAAGA

@A01056:60:HMTK7DSXY:1:1351:24207:33708 1:N:0:TCCTTAGC+ACTCGATT  
GCTCTTCCGATCTGGAAAACTCACAAAGTGCTCCAATGGATCAACTACACACCGAGTGTTAAAGAA  
TGTTTATAAGTCCAAGAAGGATGTTAGCTGATGAAGTTGGGGTCCAGCTTAAAGGAACAGCCTGTCAA  
GTGCATACTTGGGAG

@A01056:60:HMTK7DSXY:1:1351:8314:30921 1:N:0:TCCTTAGC+ACTCGATT  
GCTCTTCCGATCTGAAAACTCACAAAGTGCTCCAATGGATCAACTACACACCGAGTGTTAAAGAA  
TGTTTATAAGTCCAAGAAGGATGTTAGCTGATGAAGTTGGGGTCCAGCTTAAAGGAACAGCCTGTCAA  
GTGCATACTTGGGAG

+  
FFFFFFFFFFFFFFFFFFFFFFFFFFFFFFFFFFFFFFFFFFFFFFFFFFFFFFFFFFFFFFFFFFFFFFFF:FFF  
:FFFFFFFFFFFFFFFFFFFFFFFFFFFFFFFFFFFFFFFFFFFFFFFFFFFFFFFFFFFFFFFFFFFFFFFF  
FFFFFFFFFFFFFFFF  
@A01056:60:HMTK7DSXY:1:1351:24207:33708 2:N:0:TCCTTAGC+ACTCGATT  
GGAAAACTCACAAAGTGCTCCAATGGATCAACTACACACCGAGTGTTAAAAGAATGTTTATAAGTCC  
AAGAAGGATGTTAGCTGATGAAGTTGGGGTCCAGCTTAAAGGAACAGCCTGTCAAGTGCATACTTGGG  
AGAGATCGGAAGAGC  
+  
FFFFFFFFFFFFFFFFFFFFFFFFFFFFFFFFFFFFFFFFFFFFFFFFFFFFFFFFFFFFFFFFFFFFFFFF,FFFFFFFFFFFFF  
FFFFFFFFFFFFFFFFFFFFFFFFFFFFFFFFFFFFFFFFFFFFFFFFFFFFFFFFFFFFFFFFFFFFFFFF:FFF  
FFFFFFFFFFFFFFFF  
@A01056:60:HMTK7DSXY:1:1351:8314:30921 2:N:0:TCCTTAGC+ACTCGATT  
GGAAAACTCACAAAGTGCTCCAATGGATCAACTACACACCGAGTGTTAAAAGAATGTTTATAAGTCC  
AAGAAGGATGTTAGCTGATGAAGTTGGGGTCCAGCTTAAAGGAACAGCCTGTCAAGTGCATACTTGGG  
AGAGATCGGAAGAGC  
+  
FFFFFFFFFFFFFFFFFFFFFFFFFFFFFFFFFFFFFFFFFFFFFFFFFFFFFFFFFFFFFFFFFFFFFFFF:FFFFFFFFFFFFFFFF  
FFFFFFFFFFFFFFFFFFFFFFFFFFFFFFFFFFFFFFFFFFFFFFFFFFFFFFFFFFFFFFFFFFFFFFFF:FFFFF  
FFFFFFFFFFFFFFFF  
@A01056:60:HMTK7DSXY:1:2331:2483:16689 2:N:0:TCCTTAGC+ACTCGATT  
AAACTCACAAAGTGCTCCAATGGATCAACTACACACCGAGTGTTAAAAGAATGTTTATAAGTCCAAGA  
AGGATGTTAGCTGATGAAGTTGGGGTCCAGCTTAAAGGAACAGCCTGTCAAGTGCATACTTGGGAGAC  
CGCTTTAAAGAAGAT  
+  
FFFFFFFFFFFFFFFFFFFFFFFFFFFFFFFFFFFFFFFFFFFFFFFFFFFFFFFFFFFFFFFFFFFFFFFF::FFFFFFFFFFFFFFFF:FFFF  
FFF:FFFFFFFFFFFFFFFFFFFFFFFFFFFFFFFFFFFFFFFFFFFFFFFFFFFFFFFFFFFFFFFFFFFFFFFF  
FFFFFFFFFFFFFFFF  
@A01056:60:HMTK7DSXY:1:2331:2483:16689 1:N:0:TCCTTAGC+ACTCGATT  
CAAGAAGGATGTTAGCTGATGAAGTTGGGGTCCAGCTTAAAGGAACAGCCTGTCAAGTGCATACTTGG  
GAGACCGCTTTAAAGAAGATTGATGGAACCTTCATGGAGGTTTTATTGATGAAATAGGTCTGTACCC  
ACCTGGGTTCTCAC  
+  
FFFFFFFFFFFFFFFFFFFFFFFFFFFFFFFFFFFFFFFFFFFFFFFFFFFFFFFFFFFFFFFFFFFFFFFF  
FFFFFFFFFFFFFFFFFFFFFFFFFFFFFFFFFFFFFFFFFFFFFFFFFFFFFFFFFFFFFFFFFFFFFFFF  
FFFFFFFFFFFFFFFF  
@A01056:60:HMTK7DSXY:1:2110:21920:12868 2:N:0:TCCTTAGC+ACTCGATT  
TGGGAGACCGCTTTAAAGAAGATTGATGGAACCTTCATGGAGGTTTTATTGATGAAATAGGTCTGT  
CCACCTGGGTTCTCACATTGTTACAAATGTGTGCTTTTAGGAAGATTGTAAAGGACAGATCGGAA  
GAGCGTCGTGTAGGG  
+  
FFFFFFFFFFFFFFFFFFFFFFFFFFFFFFFFFFFFFFFFFFFFFFFFFFFFFFFFFFFFFFFFFFFFFFFF:FF:FFFFFFFFFFFF:FFFFFFFFFFFF:FFFFFFFFFFFF:FFF  
FFFFFFFFFFFFFFFFFFFFFFFFFFFFFFFFFFFFFFFFFFFFFFFFFFFFFFFFFFFFFFFFFFFFFFFF:FFF  
FFFFFFFFFFFF:FF:F  
@A01056:60:HMTK7DSXY:1:2427:4616:22639 2:N:0:TCCTTAGC+ACTCGATT  
TGGAACCTTCATGGAGGTTTTATTGATGAAATAGGTCTGTACCCACCTGGGTTCTCACATTGTTAC  
AAATGTGTGCTTTTAGGAAGATTGTAAAGGACAGAGTGAAAAGTTCTTGAAGGGTAAGCTCAGTGAG  
CTGTCAAAAACCTGT  
+  
FFFFFFFFFFFFFFFFFFFFFFFFFFFFFFFFFFFFFFFFFFFFFFFFFFFFFFFFFFFFFFFFFFFFFFFF  
FFFFFFFFFFFFFFFFFFFFFFFFFFFFFFFFFFFFFFFFFFFFFFFFFFFFFFFFFFFFFFFFFFFFFFFF  
FFFFFFFFFFFF:FFF  
@A01056:60:HMTK7DSXY:1:2427:3595:21840 2:N:0:TCCTTAGC+ACTCGATT  
TGGAACCTTCATGGAGGTTTTATTGATGAAATAGGTCTGTACCCACCTGGGTTCTCACATTGTTAC

AAATGTGTGCTTTTAGGAAGATTGTAAAAGGACAGAGTGAAAAGTTCTTGAAGGGTAAGCTCAGTGAG  
CTGTCAAAAACCTGT

```

FFFFFFFFFFFFFFFFFFFFFFFFFFFFFFFFFFFFFFFFFFFFFFFFFFFFFFFFFFFFFFFFFFFFFFFF
FFFFFFFF:FFFFFFFFFFFFFFFF::,FFFFFF:FFFFFFFFFFFFFFFFFFFFFFFFFFFFFFFFFFFF
FFFFFF:FFFFFF

```

 $+$ 

```

FFFFFFFFFFFFFFFFFFFFFFFFFFFFFFFF:FFFFFFFF,FFFFFFFFFFFF:FFFFFFFFFFFFFF
FFFFFFFFFFFFFFFF:FFFFFFFFFFFFFFFF:FFFFFFFFFFFFFFFFFFFFFFFFFFFFFFFF
FFFFFFFFFFFFFFFF

```

+

[illegible]

+

[illegible]

+

[illegible]

+

```
FFFFFFFF:FFFFFFFFFFFFFFFFFFFFFFFFFFFFFFFFFFFFFFFFFFFFFFFFFFFFFFFFFFFFF
FFF:F:FFFFFFFF:FFFFFFFFFFFFFFFFFFFFFFFF:F:F:FFFFFFFFFFFFFFFFFFFFFFFFF
FFFFFFFFFFFFFF
```

 $+$ 

```

FFFFFFFFFFFFFFFFFFFFFFFFFFFFF:FFFFFFFFFFFFFFFFFFFFFFFFFFFFFFF
FFFFFFFFFFFFFFFFFFFFFFFFFFFFFFFFFFFFFFFFFFFFFFFFFFFFFFFFFFFFF;FFFFFFFFFFFFFFFFFFFFFFFFFFFFF
EEEEEEEEEEEEEEEEE

```

@A01056:60:HMTK7DSXY:1:1566:27028:2519 1:N:0:TCCTTAGC+ACTCGATT  
TACAATTGAGATACTACTCTGCTGAGGATACAAATCTTCTAGACAGAACACATGAGATTGACATTTTG  
ATCAAGACGATCAAGCACAAATACCTTCTTCAGGGGTACAGATTGGCCAATGGTTTCAGGAGCTCAT  
AAACATGCCAACTAG

@A01056:60:HMTK7DSXY:1:2249:1108:27774 2:N:0:TCCTTAGC+ACTCGATT  
ATGAGATTGACATTTTGATCAAGACGATCAAGCACAAATACCTTCTTCAGGGGTACAGATTTCGGCCAA  
TGGTTTCAGGAGCTCATAAACATGCCAACTAGGGTGGATGACTCAAAGTTCTCAAGAAAGTTCTTTGC  
GGACATCTCCAGTGT

@A01056:60:HMTK7DSXY:1:2336:30689:9580 1:N:0:TCCTTAGC+ACTCGATT  
GATCAAGACGATCAAGCACAAATACCTTCTTCAGGGGTACAGATTCGGCCAATGTTTTCAGGAGCTCA  
TAAACATGCCAACTAGGGTGGATGACTCAAAGTTCTCAAGAAAGTTCTTTGCGGACATCTCCAGTGTG  
AAGACTGAAGATTAC

@A01056:60:HMTK7DSXY:1:1432:10276:3474 2:N:0:TCCTTAGC+ACTCGATT  
CGATCAAGCACAAATACCTTCTTCAGGGGTACAGATTTCGGCCAATGGTTTCAGGAGCTCATAAACATG  
CCAACTAGGGTGGATGACTCAAAGTTCTCAAGAAAGTTCTTTGCGGACATCTCCAGTGTGAAGACTGA  
AGATTACGGGCTCAT

@A01056:60:HMTK7DSXY:1:1569:4924:33442 2:N:0:TCCTTAGC+ACTCGATT  
GCACAAATACCTTCTTCAGGGGTACAGATTCGGCCAATGTTTTCAGGAGCTCATAAACATGCCAACTA  
GGGTGGATGACTCAAAGTTCTCAAGAAAGTTCTTTGCGGACATCTCCAGTGTGAAGACTGAAGATTAC  
GGGCTCATTCTCGTT

@A01056:60:HMTK7DSXY:1:1569:4924:33442 1:N:0:TCCTTAGC+ACTCGATT  
TCTTCAGGGGTACAGATTCGGCCAATGGTTTCAGGAGCTCATAAACATGCCAACTAGGGTGGATGACT  
CAAAGTTCTCAAGAAAGTTCTTTGCGGACATCTCCAGTGTGAAGACTGAAGATTACGGGCTCATTCTC  
GTTGCCAAAAGGGAG

@A01056:60:HMTK7DSXY:1:1432:10276:3474 1:N:0:TCCTTAGC+ACTCGATT  
GGTACAGATTTCGGCCAATGTTTTCAGGAGCTCATAAACATGCCAACTAGGGTGGATGACTCAAAGTTC  
TCAAGAAAGTTCTTTGCGGACATCTCCAGTGTGAAGACTGAAGATTACGGGCTCATTCTCGTTGCCAA  
AAGGGAGGACAAAGG

FFFFFFFFF:FFFFFFFFFFFFFFFFFFFFFFFFFFFFFFFFFFFFFFFFFFFFFFFFFFFFFFFFFFFFFFFFF:  
FFFFFFFFFFFFFFFF

@A01056:60:HMTK7DSXY:1:2249:1108:27774 1:N:0:TCCTTAGC+ACTCGATT  
GGGTGGATGACTCAAAGTTCTCAAGAAAGTTCTTTGCGGACATCTCCAGTGTGAAGACTGAAGATTAC  
GGGCTCATTCTCGTTGCCAAAAGGGAGGACAAAGGTGTTTTTGCTGGGAGGGTCCCAGTGGCCACAGT  
TAGCGAGTCTCAAGG

+

F:F:FFFFFFFF:FFFFFFFF,FFFFFFFF:FFFFFFFFFFFFFFFFFFFFFFFFFFFFFFFFFFFFFFFF  
FFFFFFFFFFFFFFFFFFFFFFFF:FFFFFFFF:FFFFFF:FF:FFFFFFFFFFFFFFFFFFFFFFFFFFFFF  
FFFFFFFFFFFFFFFF

@A01056:60:HMTK7DSXY:1:2653:19515:20415 2:N:0:TCCTTAGC+ACTCGATT  
GATGACTCAAAGTTCTCAAGAAAGTTCTTTGCGGACATCTCCAGTGTGAAGACTGAAGATTACGGGCT  
CATTCTCGTTGCCAAAAGGGAGGACAAAGGTGTTTTTGCTGGGAGGGTCCCAGTGGCCACAGTTAGCG  
AGTCTCAAGGGATGA

+

FFFFFFFFFFFFFFFFFFFFFFFFFFFFFFFFFFFFFFFFFFFFFFFFFFFFFFFFFFFFFFFFFFFFFFFF  
FFFFFFFFFFFFFFFFFFFFFFFFFFFFFFFFFFFFFFFFFFFFFFFFFFFFFFFFFFFFFFFFFFFFFFFF  
FFFFFFFFFFFFFFFF

@A01056:60:HMTK7DSXY:1:2257:27959:5040 2:N:0:TCCTTAGC+ACTCGATT  
CTCAAAGTTCTCAAGAAAGTTCTTTGCGGACATCTCCAGTGTGAAGACTGAAGATTACGGGCTCATTC  
TCGTTGCCAAAAGGGAGGACAAAGGTGTTTTTGCTGGGAGGGTCCCAGTGGCCACAGTTAGCGAGTCT  
CAAGGGATGACACTA

+

FFFFFFFFFFFFFFFFFFFFFFFF:FFFFFF:FFFFFFFFFFFFFFFFFFFF,FFFFFFFFFFFFFFFFFFFF  
FFFFFFFFFFFFFFFFFFFFFFFF,F,FFFF:F,:FFFFFFFFFFFFFFFFFFFFFFFFFFFFFFFFFFFF  
FFFFFFFFFFFF,F:

@A01056:60:HMTK7DSXY:1:1315:27868:13275 2:N:0:TCCTTAGC+ACTCGATT  
CTCAAGAAAGTTCTTTGCGGACATCTCCAGTGTGAAGACTGAAGATTACGGGCTCATTCTCGTTGCCA  
AAAGGGAGGACAAAGGTGTTTTTGCTGGGAGGGTCCCAGTGGCCACAGTTAGCGAGTCTCAAGGGATG  
ACAATAAGCAAAAGA

+

F::FFFF::,,FFFF:FFFF,FFFFFFFF::,F:FF::FFF:FFFFFFFF:FFFF,F,FFFFFFFF:  
F,F,,FFF,F,FFF,F::FFFFFFFF:FF:,F:FFFF::FF,FFFFFFFF:FFFF,,FFFF:F,,F,,  
FFFF,F:,F:FFF,F

@A01056:60:HMTK7DSXY:1:2467:29487:7091 2:N:0:TCCTTAGC+ACTCGATT  
GAAGACTGAAGATTACGGGCTCATTCTCGTTGCCAAAAGGGAGGACAAAGGTGTTTTTGCTGGGAGGG  
TCCAGTGGCCACAGTTAGCGAGTCTCAAGGGATGACAATAAGCAAAAGAGTGTTGATATGTCTGGAT  
CAAACCTCTTTGCC

+

FFFFFFFFFFFFFFFFFFFFFFFFFFFFFFFFFFFFFFFFFFFFFFFFFFFFFFFFFFFFFFFFFFFFFFFF  
FFFFFFFFFFFFFFFFFFFFFFFFFFFFFFFFFFFFFFFFFFFFFFFF:FFFF:FFFFFFFFFFFFFFFFFFFF  
FFFFFF:,FFFFFF

@A01056:60:HMTK7DSXY:1:1461:25192:32033 2:N:0:TCCTTAGC+ACTCGATT  
GAAGACTGAAGATTACGGGCTCATTCTCGTTGCCAAAAGGGAGGACAAAGGTGTTTTTGCTGGGAGGG  
TCCAGTGGCCACAGTTAGCGAGTCTCAAGGGATGACAATAAGCAAAAGAGTGTTGATATGTCTGGAT  
CAAACCTCTTTGCC

+

FFFFFFFFFFFFFFFFFFFFFFFFFFFFFFFFFFFFFFFFFFFFFFFFFFFFFFFFFFFFFFFFFFFFFFFF  
FFFFFFFFFFFFFFFFFFFFFFFFFFFFFFFFFFFFFFFFFFFFFFFFFFFFFFFFFFFFFFFFFFFFFFFF  
FFFFFFFFFFFFFFFF

@A01056:60:HMTK7DSXY:1:1301:32570:11929 2:N:0:TCCTTAGC+ACTCGATT  
GAAGACTGAAGATTACGGGCTCATTCTCGTTGCCAAAAGGGAGGACAAAGGTGTTTTTGCTGGGAGGG  
TCCAGTGGCCACAGTTAGCGAGTCTCAAGGGATGACAATAAGCAAAAGAGTGTTGATATGTCTGGAT  
CAAACCTCTTTGCC

```
+  
FFFFFFFFFFFFFFFFFFFFFFFFFFFFFFFFFFFFFFFFFFFFFFFFFFFFF:FFFFFFFFFFFFFFF,FFFFFFFFFFFFFF  
FFF,FFFFFFFFFFFFFFFFFFFFFFFFFFFFFFFFFFFFFFFFFFFFF,FFFFFFFFFFFFFFFFFFFFFFFFF,  
FFFFFFFFFFFFFFFFF  
@A01056:60:HMTK7DSXY:1:2257:27959:5040 1:N:0:TCCTTAGC+ACTCGATT  
ATTACGGGCTCATTTCTCGTGTGCCAAAAGGAGGACAAAGTGTTTTTGTCTGGGAGGGTCCCAGTGGCC  
ACAGTTAGCGAGTCTCAAGGGATGACAATAAGCAAAGAGTGTTGATATGTCTGGATCAAAACCTCTT  
TGCCGGAGGGGCCAA  
+  
FFFFFFFFFFFFFFFFFFFFFFFFFFFFFFFFFFFFFFFFFFFFFFFFFFFFFFFFF  
FFFFFFFFFFFFFFFFFFFFFFFFFFFFFFFFFFFFFFFFFFFFFFFFFFFFFFFFF  
FFFFFFFFFFFFFFFFF  
@A01056:60:HMTK7DSXY:1:1315:27868:13275 1:N:0:TCCTTAGC+ACTCGATT  
AAAGGGAGGACAAAGGTGTTTTGTCTGGGAGGGTCCCAGTGGCCACAGTTAGCGAGTCTCAAGGGATG  
ACAATAAGCAAAGAGTGTTGATATGTCTGGATCAAAACCTCTTTGCCGGAGGGGCCAATGCCGCCAT  
TGTTGCAATCACAAAG  
+  
FF:FF,FF:::FFF,F:FFFF,FFFFFFFFFFFF:,,:F:F:FFFF,FFFFFFFFFFFFFF:,FFFFFF  
,FF:F,:F:,FFFF:FFF:,F,:,FFF,:F:,FFF,FFF::FFFF,F:,:,F::FFF:::FFF  
FFFFFFFFFF:FF:,  
@A01056:60:HMTK7DSXY:1:2653:19515:20415 1:N:0:TCCTTAGC+ACTCGATT  
AAAGGGAGGACAAAGGTGTTTTGTCTGGGAGGGTCCCAGTGGCCACAGTTAGCGAGTCTCAAGGGATG  
ACAATAAGCAAAGAGTGTTGATATGTCTGGATCAAAACCTCTTTGCCGGAGGGGCCAATGCCGCCAT  
TGTTGCAATCACAAAG  
+  
FF:FFFFFFFFFFFFFFFFF,FFFFFFFFFFFFFFFFFFFFFFFFFFFFFFFFFFFFFFFFFFFFFFFFF  
FFFFFFFFFFFFFFFFFFFFFFFFFFFFFFFFFFFFFFFFFFFFFFFFFFFFFFFFF:FFFFFFFFFFFFFFFFF  
FFFFFFFFFFFFFFFFF  
@A01056:60:HMTK7DSXY:1:1301:32570:11929 1:N:0:TCCTTAGC+ACTCGATT  
CACAGTTAGCGAGTCTCAAGGGATGACAATAAGCAAAGAGTGTTGATATGTCTGGATCAAAACCTCT  
TTGCCGGAGGGGCCAATGCCGCCATTGTTGCAATCACAAGGTCGAAAGTTGGATTTGACTTTATCCTC  
AAAGGAACTCACTA  
+  
FFFFFFFFFFFFFFFFFFFFFFFFFFFFFFFFFFFFFFFFFFFFFFFFFFFFFFFFF  
FFFFFFFFFFFFFFFFFFFFFFFFFFFFFFFFFFFFFFFFFFFFFFFFFFFFFFFFF  
FFFFFFFFFFFFFFFFF  
@A01056:60:HMTK7DSXY:1:1461:25192:32033 1:N:0:TCCTTAGC+ACTCGATT  
CACAGTTAGCGAGTCTCAAGGGATGACAATAAGCAAAGAGTGTTGATATGTCTGGATCAAAACCTCT  
TTGCCGGAGGGGCCAATGCCGCCATTGTTGCAATCACAAGGTCGAAAGTTGGATTTGACTTTATCCTC  
AAAGGAACTCACTA  
+  
FFFFFFFFFFFFFFFFFFFFFFFFFFFFFFFFFFFFFFFFFFFFFFFFFFFFFFFFF  
FFFFFFFFFFFFFFFFFFFFFFFFFFFFFFFFFFFFFFFFFFFFFFFFFFFFFFFFF  
FFFFFFFFFFFFFFFFF  
@A01056:60:HMTK7DSXY:1:2467:29487:7091 1:N:0:TCCTTAGC+ACTCGATT  
CACAGTTAGCGAGTCTCAAGGGATGACAATAAGCAAAGAGTGTTGATATGTCTGGATCAAAACCTCT  
TTGCCGGAGGGGCCAATGCCGCCATTGTTGCAATCACAAGGTCGAAAGTTGGATTTGACTTTATCCTC  
AAAGGAACTCACTA  
+  
FFFFFFFFFFFFFFFFFFFFF,FFFFFFFFFFFFFFFFFFFFFFFFFFFFFFFFFFFFFFFFFFFFFFFFF  
FFFFFFFFFFFFFFFFFFFFFFFFFFFFFFFFFFFFFFFFFFFFFFFFFFFFFFFFF  
FFFFFFFFFFFFFFFFF  
@A01056:60:HMTK7DSXY:1:1178:29496:32503 1:N:0:TCCTTAGC+ACTCGATT  
CGAGTCTCAAGGGATGACAATAAGCAAAGAGTGTTGATATGTCTGGATCAAAACCTCTTTGCCGGAG
```







@A01056:60:HMTK7DSXY:1:1539:12952:7200 1:N:0:TCCTTAGC+ACTCGATT  
TAAATTTGGCAGAAGAAGAGGTTGACCCAGAGGAAGTTGTTGGGGATGTTATACAACCTATTGAATGG  
TTTAAATGCCACATACCTGTCTTCGACACAGATCCAATGCTGGCAGAGATATTCGACAAAGTAGCTGC  
AAAAGAAAAGAGAGA

@A01056:60:HMTK7DSXY:1:1331:12897:20134 1:N:0:TCCTTAGC+ACTCGATT  
TAAATTTGGCAGAAGAAGAGGTTGACCCAGAGGAAGTTGTTGGGGATGTGATACAACCTATTGAATGG  
TTTAAATGCCACATACCTGTCTTCGACACAGATCCAATGCTGGCAGAGATATTCGACAAAGTAGCTGC  
AAAAGAAAAGAGAGA

@A01056:60:HMTK7DSXY:1:2613:28140:26772 1:N:0:TCCTTAGC+ACTCGATT  
CTCTTCCGATCTATACAACCTATTGAATGGTTTAAATGCCACATACCTGTCTTCGACACAGATCCAAT  
GCTGGCAGAGATATTGACAAAAGTAGCTGCAAAGAAAAGAGAGAGTTTCAATCCATATTGGGTCTCT  
CAAATCAATTTCTGG

@A01056:60:HM7K7DSXY:1:1334:30599:33880 2:N:0:TCCTTAGC+ACTCGATT  
GATACAACCTATTGAATGGTTTAAATGCCACATACCTGTCTTCGACACAGATCCAATGCTGGCAGAGA  
TATTCGACAAAGTAGCTGCAAAAGAAAAGAGAGAGTTTCAATCCATATTGGGTCTCTCAAATCAATTT  
CTGGATATGGAGAAA

@A01056:60:HM7K7DSXY:1:1660:13539:6558 2:N:0:TCCTTAGC+ACTCGATT  
GATACAACCTATTGAATGGTTTAAATGCCACATACCTGTCTTCGACACAGATCCAGTGCTGGCAGAGA  
TATTCGACAAAGTAGCTGCAAAGAAAAGAGAGAGTTTCAATCCATATTGGGTCTCTCAAATCAATTT  
CTGGATATGGAGAAA

@A01056:60:HTMK7DSXY:1:1563:23475:8672 2:N:0:TCCTTAGC+ACTCGATT  
GATACAACCTATTGAATGGTTTAAATGCCACATACCTGTCTTCGACACAGATCCAATGCTGGCAGAGA  
TATTCGACAAAGTAGCTGCAAAAGAAAAGAGAGAGTTTCAATCCATATTGGGTCTCTCAAATCAATTT  
CTGGATATGGAGAAA

@A01056:60:HMTK7DSXY:1:2613:28140:26772 2:N:0:TCCTTAGC+ACTCGATT  
ATACAACCTATTGAATGGTTTAAATGCCACATACCTGTCTTCGACACAGATCCAATGCTGGCAGAGAT  
ATTCGACAAAGTAGCTGCAAAAGAAAAGAGAGAGTTTCAATCCATATTGGGTCTCTCAAATCAATTTCTGGAGATCGGAAGAG

+  
FFFFFFFFFFFFFFFFFFFFFFFFFFFFFFFFFFFFFFFFFFFFFFFFFFFFFFFFFFFFFFFFFFFFFFFF  
FFFFFFFFFFFFFFFFFFFFFFFFFFFFFFFFFFFFFFFFFFFFFFFFFFFFFFFFFFFFFFFFFFFFFFFF:FFFFFFFFFFFFFFFFFFFFFFFF:FF  
FFFFFFFFFFFFFFFFFFFF  
@A01056:60:HMTK7DSXY:1:1334:30599:33880 1:N:0:TCCTTAGC+ACTCGATT  
CCTATTGAATGGTTTAAATGCCACATACCTGTCTTCGACACAGATCCAATGCTGGCAGAGATATTCGA  
CAAAGTAGCTGCAAAAGAAAAGAGAGAGTTTCAATCCATATTGGGTCTCTCAAATCAATTTCTGGATA  
TGGAGAAAAACGGGT  
+  
FFFFFFFFFFFFFFFFFFFFFFFFFFFFFFFFFFFFFFFFFFFFFFFFFFFFFFFFFFFFFFFFFFFFFFFF  
FFFFF:FFFFFFFFFFFFFFFFFFFFFFFFFFFFFFFFFFFFFFFFFFFFFFFFFFFFFFFFFFFFFFFF  
FFFFFFFFFFFFFFFFFFFF  
@A01056:60:HMTK7DSXY:1:1660:13539:6558 1:N:0:TCCTTAGC+ACTCGATT  
CCTATTGAATGGTTTAAATGCCACATACCTGTCTTCGACACAGATCCAGTGCTGGCAGAGATATTCGA  
CAAAGTAGCTGCAAAAGAAAAGAGAGAGTTTCAATCCATATTGGGTCTCTCAAATCAATTTCTGGATA  
TGGAGAAAAACGGGT  
+  
FFFFFFFFFFFFFFF::FFFFFFFFFFFFFFFFFFFFFFFFFFFFFFFFFFFFFFFFFFFFFFFFFFFFFFFF  
:FFFF,FFFFFFFFFFFFFFFFFFFFFFFFFFFFFFFFFFFFFFFFFFFFFFFFFFFFFFFFFFFFFFFF  
FFFFFFFFFFFFFFFFFFFF  
@A01056:60:HMTK7DSXY:1:1563:23475:8672 1:N:0:TCCTTAGC+ACTCGATT  
CCTATTGAATGGTTTAAATGCCACATACCTGTCTTCGACACAGATCCAATGCTGGCAGAGATATTCGA  
CAAAGTAGCTGCAAAAGAAAAGAGAGAGTTTCAATCCATATTGGGTCTCTCAAATCAATTTCTGGATA  
TGGAGAAAAACGGGT  
+  
,FFFFFF:F:F::,FFFFFF,F:FFFFFF:FFFFFFFFFFFFFFFFFFFFFFFFFFFFFFFF,F:FFFFFFFFFFFFFF  
FFFF:FF:FF,FFFFFF:FFFFFFFFFFFF:FFF:FFFFFFFFFFFF:FFFFFF:FF:FF:FFFFFF:FFF  
F::FFFF:FFFFFFF  
@A01056:60:HMTK7DSXY:1:2564:12888:15828 2:N:0:TCCTTAGC+ACTCGATT  
GAGATATTCGACAAAGTAGCTGCAAAAGAAAAGAGAGAGTTTCAATCCATATTGGGTCTCTCAAATCA  
ATTTCTGGATATGGAGAAAAACGGGTGTAATATTGACATACTTCCTTTTGCTAGGCAAAATGTTTTCC  
CACATCACCAATCCT  
+  
FFFFFFFFFFFFFFFFFFFFFFFFFFFFFFFFFFFFFFFFFFFFFFFFFFFFFFFFFFFFFFFFFFFFFFFF  
:F:FFFFFFFFFFFFFF:FFFF,FFFFFFFFFFFF:,F,FFFFFFFFFF,FF:FFFF:FFF:FFFFFF:F  
,FFFFFFFFFFFFFFF,  
@A01056:60:HMTK7DSXY:1:2360:24162:20165 2:N:0:TCCTTAGC+ACTCGATT  
GTAGCTGCAAAAGAAAAGAGAGAGTTTCAATCCATATTGGGTCTCTCAAATCAATTTCTGGATATGGA  
GAAAAACGGGTGTAAGATTGACATACTTCCTTTTGCTAGGCAAAATGTTTTCCACATCACCAATCCT  
CAGATGATGTCACTT  
+  
FFFFFFFFFFFFF:FFFFFFFFFFFFFFFFFFFFFFFFFFFFFFFFFFFFFFFFFFFFFFFFFFFFFFFF  
FFFFF,FFFFFFFFFFFF:FFFFFFFFFFFF:FFFFFFFFFFFFFFFFFFFFFFFFFFFFFFFFFFFF,FFFFF  
:F:FFFFFFFFFF:FF  
@A01056:60:HMTK7DSXY:1:1123:4381:14622 2:N:0:TCCTTAGC+ACTCGATT  
TTTCAATCCATATTGGGTCTCTCAAATCAATTTCTGGATATGGAGAAAAACGGGTGTAAGATTGACAT  
ACTTCCTTTTGCTAGGCAAAATGTTTTCCACATCACCAATCCTCAGATGATGTCACTTTCTGGGCAG  
GTGTTCAAAGAGGA  
+  
FFFFFFFFFFFFFFFFFFFFFFFFFFFFFFFFFFFFFFFFFFFFFFFFFFFFFFFFFFFFFFFFFFFFFFFF  
FFFFFFFFFFFFFFFFFFFFFFFFFFFFFFFFFFFFFFFFFFFFFFFFFFFFFFFFFFFFFFFFFFFFFFFF  
FFFFFFFFFFFFFFFFFFFF  
@A01056:60:HMTK7DSXY:1:1123:4381:14622 1:N:0:TCCTTAGC+ACTCGATT  
TCAAATCAATTTCTGGATATGGAGAAAAACGGGTGTAAGATTGACATACTTCCTTTTGCTAGGCAAAA

TGTTTTCCACATCACCAATCCTCAGATGATGTCACTTTCTGGGCAGGTGTTCAAAAGAGGATAAGAA  
AGTCCAATTGGAGGC

[illegible]

TAATATTGACATACTTCCTTTTGCTAGGCAAAATGTTTTCCACATCACCAATCCTCAGATGATGTCA  
CTTTCTGGGCAGGTGTTCAAAGAGGATAAGAAAGTCCAATTGGAGGCGTAAAAATCGAAATTTGAA  
GAATTTGAGAGCCAG

[illegible]

CCACATACCAATCCTCAGATGATGTCACTTTCTGGGCAGGTGTTCAAAAGAGGATAAGAAAGTCCAA  
TTGGAGGGCGTGAAAAATCGAAATTTGAAGAATTTGAGAGCCAGGGGAAAGAACTGCTCCACGAGTTTA  
TTTCAATGTTGCCCCG

[illegible]

GTCACCTTTCTGGGCAGGTGTTCAAAAGAGGATAAGAAAGTCCAATTGGAGGCGTGAAAAATCGAAATT  
TGAAGAATTTGAGAGCCAGGGGAAAGAACTGCTCCACGAGTTTATTTCAATGTTGCCCTTTGAATTCA  
AGGTTAACATTAAAG

[illegible]

GTCACTTTCTGGGCAGGTGTTCAAAAGAGGATAAGAAAGTCCAATTGGAGGCGTGAAAAATCGAAATT  
TGAAGAATTTGAGAGCCAGGGGAAAGAACTGCTCCACGAGTTTATTTCAATGTTGCCCTTTGAATTCA  
AGGTTAACATTAAAG

```
FFFFFFFFFFFFFFFFFFFFFFFFFFFFFFFFFFFFFFFFFFFFFFFFFFFFFFFFFFFFF
FFFFFFFFFFFFFFFFFFFFFFFFFFFFFFFFFFFFFF:FFFFFFFFFFFFFFFFFFFF:F
FFFFFFFFFFFFFFFFFFFFFF
```

ACGAGTTTATTTCAATGTTGCCCTTTGAATTCAAGGTAAACATTAAAGACATTGAAGATGGAGAAAA  
AGTTTCCTGGAAAAAGAAAATTGAAGTCAGAAAAGATGTGGGCGAATCATTAGAAAAGTCTGACAT  
CGATTGGAAGCTTG

[illegible]

ACGAGTTTATTTCAATGTTGCCCTTTGAATTC AAGGTTAACATTAAGACATTGAAGATGGAGAAAAA  
AGTTTCCTGGAAAAAAGAAAATTGAAGTCAGAAAAGATGTGGGCGAATCATT CAGAAAGTCTGACAT  
CGATTGGAAGCTTG

```

FFFFFFFFFFFFFFFFFFFFFFFF:FFFFFFFFFFFFFF:FFFFFFFFFFFFFFFFFFFFFFFFFFFFFFFFFFFF
FFFFFFFFFFFFFFFFFFFFFFFF:FFFFFFFFFFFFFFFFFFFFFFFFFFFFFFFFFFFF:FFFFFFFFFFFFFFFFFFFFFFFF
FFFFFFFFFFFFFFFFFFFF

```

$+$ 

+

 $+$ 

+

+

+

+

FFFFFFFFFFFFFFFFFFFFFFFFFFFFFFFFFFFFFFFFFFFFFFFFFFFFFFFFFFFFFFFFFFFFFFFFFFFFFFFF  
FFFFFFFFFFFFFFFF

@A01056:60:HMTK7DSXY:1:2544:12644:27242 2:N:0:TCCTTAGC+ACTCGATT  
ACTACATACTCCGAAAAAACTTTTTCTGCCTAGATAGCTTTGTAACAAGAAATGCACATGTTTTT  
GACGGGTTCTCAATAGAGTCCGACTACACTGCTTTTGATTTCGTCCCAGGACCACGTCATTTTGGCCTT  
CGAGATGGCGCTATT

+

FFFFFFFFFFFFFFFFFFFFFFFFFFFFFFFFFFFFFFFFFFFFFFFFFFFFFFFFFFFFFFFFFFFFFFFFFFFF,FFFF:FFFFFFFFFFFF  
F,FFFFFFFFFFFFFFFF:FFFFFFFFFFFFFFFF:FFFFFFFFFFFFFFFFFFFFFFFFFFFFFFFF:F:FFFFFFFFFFFFFFFF  
FFFF:FFFFFFFF:FF

@A01056:60:HMTK7DSXY:1:2658:27362:4257 2:N:0:TCCTTAGC+ACTCGATT  
AAACTTTTTCTGCCTAGATAGCTTTGTAACAAGAAATGCACATGTTTTTGACGGGTTCTCAATAGAG  
TCCGACTACACTGCTTTTGATTTCGTCCCAGGACCACGTCATTTTGGCCTTCGAGATGGCGCTATTACA  
ATATTTGGGTGTATC

+

FFFFFFFFFFFFFFFFFFFFFFFFFFFFFFFFFFFFFFFFFFFFFFFFFFFFFFFFFFFFFFFFFFFFFFFFFFFF:FFFFFFFFFFFFFFFF:FFFFFFFFFFFF  
FFFFFFFFFFFFFFFFFFFFFFFFFFFFFFFFFFFFFFFFFFFFFFFFFFFFFFFFFFFFFFFFFFFFFFFFFFFF:FFFFFFFF:FF:FFFFFFFFFFFFFFFF,FFFF  
FF,FFFFFF:FFFF

@A01056:60:HMTK7DSXY:1:1343:21386:17018 2:N:0:TCCTTAGC+ACTCGATT  
AAACTTTTTCTGCCTAGATAGCTTTGTAACAAGAAATGCACATGTTTTTGACGGGTTCTCAATAGAG  
TCCGACTACACTGCTTTTGATTTCGTCCCAGGACCACGTCATTTTGGCCTTCGAGATGGCGCTATTACA  
ATATTTGGGTGTATC

+

FFFFFFFFFFFFFFFFFFFFFFFFFFFFFFFFFFFFFFFFFFFFFFFFFFFFFFFFFFFFFFFFFFFFFFFFFFFF  
FFFFFFFFFFFFFFFFFFFFFFFFFFFFFFFFFFFFFFFFFFFFFFFFFFFFFFFFFFFFFFFFFFFFFFFFFFFF  
FFFFFFFFFFFFFFFF

@A01056:60:HMTK7DSXY:1:2216:16342:27414 2:N:0:TCCTTAGC+ACTCGATT  
AAACTTTTTCTGCCTAGATAGCTTTGTAACAAGAAATGCACATGTTTTTGACGGGTTCTCAATAGAG  
TCCGACTACACTGCTTTTGATTTCGTCCCAGGACCACGTCATTTTGGCCTTCGAGATGGCGCTATTACA  
ATATTTGGGTGTATC

+

FFF,FFFFFFFFFFFFFFFFFFFFFFFFFFFFFFFFFFFFFFFFFFFFFFFFFFFFFFFFFFFFFFFFFFFF  
FFFF:FFFFFFFFFFFFFFFF,FFFFFFFFFFFFFFFFFFFFFFFFFFFFFFFF:FF:FFFFFFFFFFFFFFFFFFFFFFFF:FF  
FFFFFFFF:FFFF

@A01056:60:HMTK7DSXY:1:1336:25979:7247 1:N:0:TCCTTAGC+ACTCGATT  
TCTCAATAGAGTCCGACTACACTGCTTTTGATTTCGTCCCAGGACCACGTCATTTTGGCCTTCGAGATG  
GCGCTATTACAATATTTGGGTGTATCTAAAGAATTTAGCTTGACTATCTGAGATTGAAGTAACTCT  
TGGTTGTCGACTTGG

+

FFFFFFFFFFFFFFFFFFFFFFFFFFFFFFFFFFFFFFFFFFFFFFFFFFFFFFFFFFFFFFFFFFFFFFFFFFFF  
FFFFFFFFFFFFFFFFFFFFFFFFFFFFFFFFFFFFFFFFFFFFFFFFFFFFFFFFFFFFFFFFFFFFFFFFFFFF  
FFFFFFFFFFFFFFFF

@A01056:60:HMTK7DSXY:1:2544:12644:27242 1:N:0:TCCTTAGC+ACTCGATT  
TCTCAATAGAGTCCGACTACACTGCTTTTGATTTCGTCCCAGGACCACGTCATTTTGGCCTTCGAGATG  
GCGCTATTACAATATTTGGGTGTATCTAAAGAATTTAGCTTGACTATCTGAGATTGAAGTAACTCT  
TGGTTGTCGACTTGG

+

FF:FFFFFFFFFFFFFFFFFFFFFFFFFFFFFFFFFFFFFFFFFFFFFFFFFFFFFFFFFFFFFFFFFFFF  
FFFFFFFFFFFFFFFFFFFFFFFFFFFFFFFFFFFFFFFFFFFFFFFFFFFFFFFFFFFFFFFFFFFFFFFFFFFF  
FFFFFFFFFFFFFFFF

@A01056:60:HMTK7DSXY:1:2136:10601:35321 2:N:0:TCCTTAGC+ACTCGATT  
CCCAGGACCACGTCATTTTGGCCTTCGAGATGGCGCTATTACAATATTTGGGTGTATCTAAAGAATTT  
CAGCTTGACTATCTGAGATTGAAGTAACTCTTGGTTGTCGACTTGGGTCATTGGCAATAATGAGATT  
CACTGGGGAATTTTG

+  
FFFF:FFFFFFFFFFFFFFFFFFFFFFFFFFFFFFFFFFFFFFFFFFFFFFFFFFFFFFFFFFFFFFFFF,:FFFFFFFFFFFFFFFF  
F:FFFF,FFFFFFFFFFFFFFFF::FFFF:F:FFFF::FF,FFFF:F,FFFFFFFFFFFFFFFFFFFFFFF:FF::F  
FFFF::FFFFFFFFF,  
@A01056:60:HMTK7DSXY:1:1343:21386:17018 1:N:0:TCCTTAGC+ACTCGATT  
AGGACCACGTCAATTTGGCCTTGCAGATGGCGCTATTACAATAATTTGGGTGTATCTAAAGAATTTGAG  
CTTGACTATCTGAGATTGAAGTTAACTCTTGGTTGTCGACTTGGGTCATTGGCAATAATGAGATTCAC  
TGGGAATTTTGCAC  
+  
FFFFFFFFFFFFFFFFFFFFFFFFFFFFFFFFFFFFFFFFFFFFFFFFFFFFFFFFFFFFFFFFFFFFFFF  
FFFFFFFFFFFFFFFFF:FFFFFFFFFFF,F:FFFFFFFFFFFFFFFFFFFFFFFFFFFFFFFFFFFFFFF  
FFFFFFFFFFFFFFFFF  
@A01056:60:HMTK7DSXY:1:2658:27362:4257 1:N:0:TCCTTAGC+ACTCGATT  
AGGACCACGTCAATTTGGCCTTGCAGATGGCGCTATTACAATAATTTGGGTGTATCTAAAGAATTTGAG  
CTTGACTATCTGAGATTGAAGTTAACTCTTGGTTGTCGACTTGGGTCATTGGCAATAATGAGATTCAC  
TGGGAATTTTGCAC  
+  
FFF:FFFF:FFFFFFFFFFF,FFFFFFFFFFFFFFFFFFFFFFFFFFFFFFFFF:FFFFFFFFFFFFFFFFFFFFFFF  
FFFFFFFFFFFFFFFFF:FFFFFFFFFFFFFFFFFFFFFFFFFFFFFFFFFFFFFFFFFFFFFFFFFFFFFFF  
FFFFFFFFFFFFFFFFF  
@A01056:60:HMTK7DSXY:1:2216:16342:27414 1:N:0:TCCTTAGC+ACTCGATT  
AGGACCACGTCAATTTGGCCTTGCAGATGGCGCTATTACAATAATTTGGGTGTATCTAAAGAATTTGAG  
CTTGACTATCTGAGATTGAAGTTAACTCTTGGTTGTCGACTTGGGTCATTGGCAATAATGAGATTCAC  
TGGGAATTTTGCAC  
+  
FFFFFFFFF:FFFFFFFFFFFFFFFFFFFFFFFFFFFFFFFFF:F,FFFFFFFF:F:FFFFFFFFFFFFFFFFFFFFFFF  
FFFFFFFFFFFFFFFFF:FFFFFFFFFFFFFFFFFFFFFFFFFFFFFFFFFFFFFFFFFFFFFFFFFFFFFFF  
FFFFFFFFFFFFFFFFF  
@A01056:60:HMTK7DSXY:1:2255:28257:18051 2:N:0:TCCTTAGC+ACTCGATT  
CGTCAATTTTGGCCTTGCAGATGGCGCTATTACAATAATTTGGGTGTATCTAAAGAATTTGAGCTTGACT  
ATCTGAGATTGAAGTTAACTCTTGGTTGTCGACTTGGGTCATTGGCAATAATGAGATTCAGTGGGAA  
TTTTGCACCTTTCTG  
+  
FFFFFFFFFFFFFFFFFFFFFFFFFFFFFFFFFFFFFFFFFFFFFFFFFFFFFFFFFFFFFFFFFFFFFFF  
FFFFFFFFF:FFFFFFFFFFFFFFFFFFFFFFFFFFFFFFFFFFFFFFFFFFFFFFFFFFFFFFFFFFFFFFF:FFFFFFFFFFFF  
FFFF:FFFFFFFFFFFF  
@A01056:60:HMTK7DSXY:1:2345:18005:3145 1:N:0:TCCTTAGC+ACTCGATT  
GGTGTATCTAAAGAATTTGAGCTTGACTATCTGAGATTGAAGTTAACTCTTGGTTGTCGACTTGGGTC  
ATTGGCAATAATGAGATTCAGTGGGGAATTTTGCACCTTTCTGTTTAACACATTTGCCAACATGCTTT  
TCACTCAGTTGAAGT  
+  
FFFFFFFFFFFFFFFFF:FFFFFFFFFFFFFFFFFFFFFFFFFFFFFFFFFFFFFFFFFFFFFFFFFFFFFFF:FFFFFFFFFFFFFFF  
FFFFFFFFFFFFFFFFFFFFFFFFFFFFFFFFFFFFFFFFFFFFFFFFFFFFFFFFFFFFFFFFFFFFFFF  
FFF:FFFFFFFFFFFF  
@A01056:60:HMTK7DSXY:1:1637:22598:6652 1:N:0:TCCTTAGC+ACTCGATT  
GGTGTATCTAAAGAATTTGAGCTTGACTATCTGAGATTGAAGTTAACTCTTGGTTGTCGACTTGGGTC  
ATTGGCAATAATGAGATTCAGTGGGGAATTTTGCACCTTTCTGTTTAACACATTTGCCAACATGCTTT  
TCACTCAGTTGAAGT  
+  
FFFFFFFFF:FFFFFFFFFFFFFFFFFFFFFFFFFFFFFFFFFFFFFFFFFFFFFFFFFFFFFFF:FFFF:FFFFFFFFFFFFFFF  
FFFFFFFFFFFFFFFFFFFFFFFFFFFFFFFFFFFFFFFFFFFFFFFFFFFFFFFFFFFFFFFFFFFFFFF:FFFFFFFF  
FFFFFFFFFFFFFFFFF  
@A01056:60:HMTK7DSXY:1:1152:5764:14356 2:N:0:TCCTTAGC+ACTCGATT  
AAAGAATTTGAGCTTGACTATCTGAGATTGAAGTTAACTCTTGGTTGTCGACTTGGGTCATTGGCAAT

AATGAGATTCACTGGGGAATTTTGCACCTTTCTGTTTAACACATTTGCCAACATGCTTTTCACTCAGT  
TGAAGTACAAAATAG

+

FFFFFFFFFFFFFFFFFFFFFFFFFFFFFFFFFFFFFFFFFFFFFFFFFFFFFFFFFFFFFFFFFFFFFFFF  
FFFFFFFFFFFFFFFFFFFFFFFFFFFFFFFFFFFFFFFFFFFFFFFFFFFFFFFFFFFFFFFFFFFFFFFF  
FFFFFFFFFFFF:FFFF

@A01056:60:HMTK7DSXY:1:2255:28257:18051 1:N:0:TCCTTAGC+ACTCGATT  
TTTCAGCTTGACTATCTGAGATTGAAGTTAACTCTTGTTGTCGACTTGGGTCATTGGCAATAATGAG  
ATTCAGTGGGGAATTTTGCACCTTTCTGTTTAACACATTTGCCAACATGCTTTTCACTCAGTTGAAGT  
ACAAAATAGACCCAC

+

FFFFFFFFFFFFFFFFFFFFFFFFFFFFFFFFFFFFFFFFFFFFFFFFFFFFFFFFFFFFFFFFFFFFFFFF  
FFFFFFFFFFFFFFFFFFFFFFFFFFFFFFFFFFFFFFFFFFFFFFFFFFFFFFFFFFFFFFFFFFFFFFFF  
FFFFFFFFFFFFFFFF

@A01056:60:HMTK7DSXY:1:1152:5764:14356 1:N:0:TCCTTAGC+ACTCGATT  
TTCAGCTTGACTATCTGAGATTGAAGTTAACTCTTGTTGTCGACTTGGGTCATTGGCAATAATGAGA  
TTCAGTGGGGAATTTTGCACCTTTCTGTTTAACACATTTGCCAACATGCTTTTCACTCAGTTGAAGTA  
CAAAATAGACCCACG

+

FFFFFFFFFFFFFFFFFFFFFFFFFFFFFFFFFFFFFFFFFFFFFFFFFFFFFFFFFFFFFFFFFFFFFFFF  
FFFFFFFFFFFFFFFFFFFFFFFFFFFFFFFFFFFFFFFFFFFFFFFFFFFFFFFFFFFFFFFFFFFFFFFF  
FFFFFFFFFFFFFFFF

@A01056:60:HMTK7DSXY:1:2136:10601:35321 1:N:0:TCCTTAGC+ACTCGATT  
TTCAGCTTGACTATCTGAGATTGAAGTTAACTCTTGTTGTCGACTTGGGTCATTGGCAATAATGAGA  
TTCAGTGGGGAATTTTGCACCTTTCTGTTTAACACATTTGCCAACATGCTTTTCACTCAGTTGAAGTA  
CAAAATAGACCCACG

+

::FFF,F::,,:FFFFFF:,:FF:,:FFF::,:,:,:FFF:FF::F,,F,FF:FFFFFF:F:::FFFFFF  
FFFFFF,FF,,FFFFFF:FFFFFFFF:FFFF,:FFFF:F,FFFFFFFFFFFFFFFFFFFFFFFF  
FFF,FFFFFFFF:F

@A01056:60:HMTK7DSXY:1:1637:22598:6652 2:N:0:TCCTTAGC+ACTCGATT  
AGATTGAAGTTAACTCTTGTTGTCGACTTGGGTCATTGGCAATAATGAGATTCACTGGGGAATTTTG  
CACCTTTCTGTTTAACACATTTGCCAACATGCTTTTCACTCAGTTGAAGTACAAAATAGACCCACGGA  
AACATAGAATCTTAT

+

FFFFFFFFFFFFFFFF:FF:FFF:FFFFFFFFFFFFFFFFFFFFFFFFFFFFFFFF,FFFFFFFFFFFFFFFF  
FFFFFFFF:FFFFFFFFFFFFFFFFFFFFFFFFFFFFFFFFFFFFFFFF:FFFFFFFFFFFFFFFFFFFFFFFF  
FFFFFFFFFFFFFFFF

@A01056:60:HMTK7DSXY:1:2345:18005:3145 2:N:0:TCCTTAGC+ACTCGATT  
AGATTGAAGTTAACTCTTGTTGTCGACTTGGGTCATTGGCAATAATGAGATTCACTGGGGAATTTTG  
CACCTTTCTGTTTAACACATTTGCCAACATGCTTTTCACTCAGTTGAAGTACAAAATAGACCCACGGA  
AACATAGAATCTTAT

+

FFFF,FFFFFF:FFFF::FFFFFFFFFFFFFFFF:FFFFFFFFFFFF:FFFFF,:FFFFFFFFFFFFFFFF  
FFFFFFFFF,:FF:FFFFFFFFFFFFFFFFFFFFFFFFFFFFFFFFFFFFFFFFFFFFFFFFFFFFFFFF  
FFFFFFFFFFFFFFFF

@A01056:60:HMTK7DSXY:1:2618:10393:1673 2:N:0:TCCTTAGC+ACTCGATT  
ATTGAAGTTAACTCTTGTTGTCGACTTGGGTCATTGGCAATAATGAGATTCACTGGGGAATTTTGCA  
CCTTTCTGTTTAACACATTTGCCAACATGCTTTTCACTCAGTTGAAGTACAAAATAGACCCACGGA  
CATAGAATCTTATTC

+

FFFFFFFFFFFFFFFFFFFFFFFFFFFFFFFFFFFFFFFFFFFFFFFFFFFFFFFFFFFFFFFFFFFFFFFF  
:FFFFFFFFF:FFFFFFFFFFFFFFFFFFFFFFFFFFFFFFFF:FFFFFFFF:FFFF:FFFFFFFF,FFFFF,  
::F:,FFF:FFFF,



@A01056:60:HMTK7DSXY:1:2618:10393:1673 1:N:0:TCCTTAGC+ACTCGATT  
AAGTTAACTCTTGGTTGTCGACTTGGGTCATTGGCAATAATGAGATTCAGTGGGGAATTTTGCACCTT  
TCTGTTTAAACATTTGCCAACATGCTTTTCACTCAGTTGAAGTACAAAATAGACCCACGGAACATA  
GAATCTTATTCGCAG

@A01056:60:HMTK7DSXY:1:2508:2465:16783 2:N:0:TCCTTAGC+ACTCGATT  
CGACTTGGGTCATTGGCAATAATGAGATTCACTGGGGAATTTTGCACCTTTCTGTTTAACACATTTGC  
CAACATGCTTTTCACTCAGTTGAAGTACAAAATAGACCCACGGAAACATAGAATCTTATTTCGCAGGGG  
ATGACATGTGTTCT

@A01056:60:HMTK7DSXY:1:2523:4047:28322 2:N:0:TCCTTAGC+ACTCGATT  
CGACTTGGGTCATTGGCAATAATGAGATTCACTGGGGAATTTTGCACCTTTCTGTTTAACACATTTGC  
CAACATGCTTTTCACTCAGTTGAAGTACAAAATAGACCCACGGAAACATAGAATCTTATTCGCAGGGG  
ATGACATGTGTTCT

@A01056:60:HMTK7DSXY:1:1374:14714:1423 2:N:0:TCCTTAGC+ACTCGATT  
GACTTGGGTCATTGGCAATAATGAGATTCAGTGGGGAATTTTGCACCTTTCTGTTTAACACATTTGCC  
AACATGCTTTTCACTCAGTTGAAGTACAAAATAGACCCACGGAAACATAGAATCTTATTCGCAGGGGA  
TGACATGTGTTCTT

@A01056:60:HMTK7DSXY:1:2508:2465:16783 1:N:0:TCCTTAGC+ACTCGATT  
TTCACCTCAGTTGAAGTACAAAATAGACCCACGGAAACATAGAATCTTATTTCGCAGGGGATGACATGTG  
TTCCTTGAGCTCTCTCAAGAGGAGAAGAGGAGAAAGAGCAAAAAGGCTGATGAAGAGCTTTTCCCTAA  
CTGCGGTGGAGGAAG

@A01056:60:HMTK7DSXY:1:2523:4047:28322 1:N:0:TCCTTAGC+ACTCGATT  
TTCAGTCAGTTGAAGTACAAAATAGACCCACGGAAACATAGAATCTTATTTCGAGGGGATGACATGTG  
TTCCTTGAGCTCTCTCAAGAGGAGAAGAGGAGAAAGAGCAAAAAGGCTGATGAAGAGCTTTTCCCTAA  
CTGCGGTGGAGGAAG

@A01056:60:HMTK7DSXY:1:2117:26467:8093 2:N:0:TCCTTAGC+ACTCGATT  
AAACATAGAATCTTATTCGCAGGGGATGACATGTGTTCTTGAGCTCTCTCAAGAGGAGAAGAGGAGA  
AAGAGCAAAAAGGCTGATGAAGAGCTTTTCCCTAACTGCGGTGGAGGAAGTGAGGAAATTCCTATGT  
TCTGTGGATGGTATT

FFFF:FFFFFFFFFFFFFFFFFFFFFFFFFFFFFFFFFFFFFFFF:FFFFFFFFFFFFFFFFFFFFFFFFFFFF  
FF:FFFFFFFF::FFF

@A01056:60:HMTK7DSXY:1:2632:17580:26616 2:N:0:TCCTTAGC+ACTCGATT  
AGAGCTTTTCCCTAACTGCGGTGGAGGAAGTGAGGAAATTCCTATGTTCTGTGGATGGTATTTGAGT  
CCATATGGAATTATTAATCTCCAAAATTGCTATGGGCCAGAATTAAGATGATGAGTGAAAGACAGCT  
CCTGAAAGAATGCGT

+

FFFFFFFFFFFFFFFFFFFFFFFFFFFFFFFFFFFFFFFFFFFFFFFFFFFFFFFFFFFFFFFFFFFFFFFF,FF  
FFFFFFFFFFFFFFFFFFFFFFFFFFFFFFFFFFFFFFFFFFFFFFFFFFFFFFFFFFFFFFFFFFFFFFFF:FFFFFFFFF  
FFFFFFFFF:FFFFF

@A01056:60:HMTK7DSXY:1:1374:14714:1423 1:N:0:TCCTTAGC+ACTCGATT  
GAGCTTTTCCCTAACTGCGGTGGAGGAAGTGAGGAAATTCCTATGTTCTGTGGATGGTATTTGAGTC  
CATATGGAATTATTAATCTCCAAAATTGCTATGGGCCAGAATTAAGATGATGAGTGAAAGACAGCTC  
CTGAAAGAATGCGTT

+

FFFFFFFFFFFFFFFFFFFFFFFFFFFFFFFFFFFFFFFFFFFFFFFFFFFFFFFFFFFFFFFFFFFFFFFF:FFFFFFF  
FFFFFFFFFFFFFFFFFFFFFFFFFFFFFFFFFFFFFFFFFFFFFFFFFFFFFFFFFFFFFFFFFFFFFFFFFFFFF  
FFFFFFFFFFFFFFFFF

@A01056:60:HMTK7DSXY:1:1568:19723:8688 2:N:0:TCCTTAGC+ACTCGATT  
CTAACTGCGGTGGAGGAAGTGAGGAAATTCCTATGTTCTGTGGATGGTATTTGAGTCCATATGGAAT  
TATTAATCTCCAAAATTGCTATGGGCCAGAATTAAGATGATGAGTGAAAGACAGCTCCTGAAAGAAT  
GCGTTGACAACATC

+

FFFFFFFFFFFFFFFFFFFFFFFFFFFFFFFFFFFFFFFFFFFFFFFFFFFFFFFFFFFFFFFFFFFFFFFFF  
FFFFFFF:FFFFFFFFFFFFFFFFF:FFFFFFFFFFFFFFFFFFFFFFFFFFFFFFFFFFFFFFFFFFFFF  
FFFFFFF:FFFFFFFFF

@A01056:60:HMTK7DSXY:1:2618:26765:30467 2:N:0:TCCTTAGC+ACTCGATT  
GAGGAAATTCCTATGTTCTGTGGATGGTATTTGAGTCCATATGGAATTATTAATCTCCAAAATTGC  
TATGGGCCAGAATTAAGATGATGAGTGAAAGACAGCTCCTGAAAGAATGCGTTGACAACATCTGTTT  
GAGGCAATATTTGCC

+

FFFFFFFFFFFFFFFFFFFFFFFFFFFFFFFFFFFFFFFFFFFFFFFFFFFFFFFFFFFFFFFFFFFFFFFFF  
F:FFFFFFFFFFFFFFFFF:FFFFFFFFFFFFFFFFFFFFFFFFFFFFFFFFFFFFFFFFFFFFFFFFFFFFF  
FFFFFFF:FF:FFFFF

@A01056:60:HMTK7DSXY:1:1361:24171:20964 1:N:0:TCCTTAGC+ACTCGATT  
TGGATGGTATTTGAGTCCATATGGAATTATTAATCTCCAAAATTGCTATGGGCCAGAATTAAGATGA  
TGAGTGAAAGACAGCTCCTGAAAGAATGCGTTGACAACATCTGTTTGAGGCAATATTTGCCTACAGA  
TTAGGTGAGAGGCTG

+

FFFFFFF:FFFFFFFFFFFFFFFFFFFFFFFFFFFFFFFFFFFFFFFFFFFFFFFFFFFFFFFFFFFFFFFFF  
FFFFF:FFFFFFFFFFFFFFFFFFFFFFFFFFFFFFFFFFFFFFFFFFFFFFFFFFFFFFFFFFFFFFFFFFFFF  
FFFFFFFFFFFFFFFFF

@A01056:60:HMTK7DSXY:1:2633:27715:16924 2:N:0:TCCTTAGC+ACTCGATT  
TGGAATTATTAATCTCCAAAATTGCTATGGGCCAGAATTAAGATGATGAGTGAAAGACAGCTCCTGA  
AAGAATGCGTTGACAACATCTGTTTGAGGCAATATTTGCCTACAGATTAGGTGAGAGGCTGTACACA  
ATTTTGAAAGAAGAA

+

FFFFFFFFFFFFFFFFFFFFFFFFFFFFFFFFFFFFFFFFFFFFFFFFFFFFFFFFFFFFFFFFFFFFFFFFF  
FFFFFFFFFFFFFFFFFFFFFFFFFFFFFFFFFFFFFFFFFFFFFFFFFFFFFFFFFFFFFFFFFFFFFFFFF  
FFFFFFFFFFFFFFFFF

@A01056:60:HMTK7DSXY:1:1568:19723:8688 1:N:0:TCCTTAGC+ACTCGATT  
GAATTATTAATCTCCAAAATTGCTATGGGCCAGAATTAAGATGATGAGTGAAAGACAGCTCCTGAAA  
GAATGCGTTGACAACATCTGTTTGAGGCAATATTTGCCTACAGATTAGGTGAGAGGCTGTACACAAT  
TTTGAAAGAAGAAGA

+  
FFFFFFFFFFFFFFFFFFFFFFFFFFFFFFFFFFFFFFFFFFFFFFFFFFFFFFFFFFFFFFFFFFFFFFFF  
FFFFFFFFFFFFFFFFFFFFFFFFFFFFFFFFFFFFFFFFFFFFFFFFFFFFFFFFFFFFFFFFFFFFFFFF  
FFFFFFFFFFFFFFFF  
@A01056:60:HMTK7DSXY:1:1371:32859:6856 2:N:0:TCCTTAGC+ACTCGATT  
AATTATTAAATCTCCAAAATTGCTATGGGCCAGAATTAAGATGATGAGTGAAAGACAGCTCCTGAAAG  
AATGCGTTGACAACATCTGTTTGAGGCAATATTTGCCTACAGATTAGGTGAGAGGCTGTACACAATT  
TTGAAAGAAGAAGAC  
+  
FF:FFFFFFFFFFFFFFFFFFFFFFFFFFFFFFFFFFFFFFFFFFFFFFFFFFFFFFFFFFFFFFFFFFFF  
FFFFFFFFFFFF:FFFFFFFFFFFFFFFFFFFFFFFFFFFFFFFFFFFFFFFFFFFFFFFFFFFFFFFFFFFF  
FFFFFFFF:FFFFFFF  
@A01056:60:HMTK7DSXY:1:1448:6162:30201 2:N:0:TCCTTAGC+ACTCGATT  
TGATGAGTGAAAGACAGCTCCTGAAAGAATGCGTTGACAACATCTGTTTGAGGCAATATTTGCCTAC  
AGATTAGGTGAGAGGCTGTACACAATTTTGAAAGAAGAAGACTTTGAATATCATTATCTTGTTATAAG  
ATTCTTTGTCAAGAA  
+  
FFFFFFFFFFFFFFFFFFFFFFFFFFFFFFFFFFFFFFFFFFFFFFFFFFFFFFFFFFFFFFFFFFFFFFFF  
FFFFFFFFFFFF:FFFFFFFFFFFFFFFFFFFF:FF:FFFFFF:FFFFFFFFFFFFFFFFFFFFFFFFFFFF  
FFFFFFFFFFFFFFFFFFFF:  
@A01056:60:HMTK7DSXY:1:2117:26467:8093 1:N:0:TCCTTAGC+ACTCGATT  
GCTCCTGAAAGAATGCGTTGACAACATCTGTTTGAGGCAATATTTGCCTACAGATTAGGTGAGAGGC  
TGACACAATTTTGAAAGAAGAAGACTTTGAATATCATTATCTTGTTATAAGATTCTTTGTCAAGAAT  
TCGAAACTACTAACG  
+  
FFFFF:FF:FFFFFFFFFFFFFFFFFFFFFFFFFFFFFFFFFFFFFFFFFFFFFFFFFFFFFFFFFFFF  
FFFFFFFFFFFFFFFFFFFFFFFFFFFFFFFFFFFFFFFFFFFFFFFFFFFFFFFFFFFFFFFFFFFFFFFF  
FFFFFFFFFFFFFFFFFFFF  
@A01056:60:HMTK7DSXY:1:1371:32859:6856 1:N:0:TCCTTAGC+ACTCGATT  
TCCTGAAAGAATGCGTTGACAACATCTGTTTGAGGCAATATTTGCCTACAGATTAGGTGAGAGGCTG  
TACACAATTTTGAAAGAAGAAGACTTTGAATATCATTATCTTGTTATAAGATTCTTTGTCAAGAATC  
GAAACTACTAACGGG  
+  
FFFFFFFFFFFFFFFFFFFFFFFFFFFFFFFFFFFFFFFFFFFFFFFFFFFFFFFFFFFFFFFFFFFF:FFFFFFFFFFFFFFFFFFFF  
FFFFFFFFFFFFFFFFFFFFFFFFFFFFFFFFFFFFFFFFFFFFFFFFFFFFFFFFFFFFFFFFFFFFFFFF  
FFFFFFFFFFFFFFFFFFFF  
@A01056:60:HMTK7DSXY:1:2618:26765:30467 1:N:0:TCCTTAGC+ACTCGATT  
TCCTGAAAGAATGCGTTGACAACATCTGTTTGAGGCAATATTTGCCTACAGATTAGGTGAGAGGCTG  
TACACAATTTTGAAAGAAGAAGACTTTGAATATCATTATCTTGTTATAAGATTCTTTGTCAAGAATC  
GAAACTACTAACGGG  
+  
.:FFFFFFFFFFFFFFFFFFFFFFFFFFFFFFFFFFFFFFFFFFFFFFFFFFFFFFFFFFFFFFFFFFFF  
FFFFFFFFFFFFFFFFFFFFFFFFFFFFFFFFFFFFFFFFFFFFFFFFFFFFFFFFFFFFFFFFFFFFFFFF  
FFFFFFFFFFFFFFFFFFFF  
@A01056:60:HMTK7DSXY:1:2208:14742:17566 2:N:0:TCCTTAGC+ACTCGATT  
ATCTGTTTGAGGCAATATTTGCCTACAGATTAGGTGAGAGGCTGTACACAATTTTGAAAGAAGAAGAC  
TTTGAATATCATTATCTTGTTATAAGATTCTTTGTCAAGAATTCGAAACTACTAACGGGTTTAAGCAA  
AAGCTTAATTCTTGA  
+  
FFFFFFFFFFFFFFFFFFFFFFFFFFFFFFFFFFFFFFFFFFFFFFFFFFFFFFFFFFFFFFFFFFFFFFFF  
FFFFFFFFFFFFFFFFFFFFFFFFFFFFFFFFFFFF,FFF:FFFFFF:FFFFFFFFFFFFFFFFFFFFFFFFFFFF:FFF  
FFFFFFFFFFFFFFFFFFFF  
@A01056:60:HMTK7DSXY:1:1448:6162:30201 1:N:0:TCCTTAGC+ACTCGATT  
GAGGCAATATTTGCCTACAGATTAGGTGAGAGGCTGTACACAATTTTGAAAGAAGAAGACTTTGAATA

TCATTATCTTGTTATAAGATTCTTTGTCAAGAATTCGAACTACTAACGGGTTTAAGCAAAAGCTTAA  
TTCTTGAAATTGGAG

[illegible]

+

@A01056:60:HMTK7DSXY:1:2633:27715:16924 1:N:0:TCCTTAGC+ACTCGATT  
TGCCTACAGATTAGGTGAGAGGCTGTACACAATTTTGAAAAGAAGAAGACTTTGAATATCATTATCTTG  
TTATAAGATTCTTTGTCAAGAATTCGAAACTACTAACGGGTTTAAGCAAAAGCTTAATTCTTGAAATT  
GGAGAAGGAATTGGG

[illegible]

+

@A01056:60:HMTK7DSXY:1:2335:29414:36088 2:N:0:TCCTTAGC+ACTCGATT  
GCTGTACACAATTTTGAAAGAAGACTTTGAATATCATTATCTTGTTATAAGATTCTTTGTCAAGA  
ATTCGAAACTACTAACGGGTTTAAGCAAAAGCTTAATTCTTGAAATTGGAGAAGGAATTGGGTCGGAA  
TGGCGATCGTCAATG

```

FFFFFFFFFFFFFFFFFFFFFFFFFFFFFFFFFFFFFFFF:FFFFFFFFFFFFFF:F:FFFFFFFF
FF:FFFFFFFFFFFFFFFF:FFFFFFFF:FF:FF:FFFFFFFFFFFFFFFF:FF,FFFFFFFF:FFFFFFFF
FFF:FFFFFFFF

```

+

@A01056:60:HMTK7DSXY:1:1351:12915:15624 1:N:0:TCCTTAGC+ACTCGATT  
ACCATTTCTCAAGGAGGTCGAGTCAACAGATCTCAAGATTGACGCAATCTCATCTCAGAACTTTAC  
AAAGATGCAACCTTTTTCAAGCCGATGTGCTCAATTGTATTAAAAGATTGAGTCAAATGTCAAAGT  
TTCCTCCAGGTCTGG

[illegible]

$+$ 

+

+

+

+

+

+

[illegible]

FFFFFFFFFFFFFFFFFFFFFFFFFFFFFFFFFFFFFFFFFFFFFFFFFFFFFFFFFFFFFFFFFFFFFFFF:FF  
FFFF:FFFFFFFF  
@A01056:60:HMTK7DSXY:1:2545:30138:27853 1:N:0:TCCTTAGC+ACTCGATT  
AATCGACTCAATCAGAAAGAAGAGCAACAAGTACAAGTACTTGCATTATGGAGTCATTCTGGTTGGAA  
TCAAAGCAATGCTGCCAACTTCAGAGGCATGGAAGGAAGGGTCATTGTGTATGATGGAGCCTGCCTT  
GATCCGGAAAGAGGC  
+  
FFFFFFFFFFFFFFFFFFFFFFFFFFFFFFFFFFFFFFFFFFFFFFFFFFFFFFFFFFFFFFFFFFFFFFFF  
FFFFFFFFFFFFFFFFFFFFFFFFFFFFFFFFFFFFFFFFFFFFFFFFFFFFFFFFFFFFFFFFFFFFFFFF  
FFFFFFFFFFFFFFFF  
@A01056:60:HMTK7DSXY:1:2148:1542:31939 1:N:0:TCCTTAGC+ACTCGATT  
GACTCAATCAGAAAGAAGAGCAACAAGTACAAGTACTTGCATTATGGAGTCATTCTGGTTGGAATCAA  
AGCAATGCTGCCAACTTCAGAGGCATGGAAGGAAGGGTCATTGTGTATGATGGAGCCTGCCTTGATC  
CGGAAAGAGGCCAAT  
+  
FFFFFFFFFFF:FFFFFF:F,FFFFFFFFFFFFFFFFFFFFFFFFFFFFFFFFFFFFFFFFFFFFFFFF  
FFFFFF:FF:FFFFFFFFFFFFFFFFFFFFFFFFFFFFFFFFFFFFFFFFFFFFFFFF:FFFFFF:FFFFFFFF  
FFFFFFFFFFFFFFFF  
@A01056:60:HMTK7DSXY:1:2218:13847:29168 2:N:0:TCCTTAGC+ACTCGATT  
ATTCTGGTTGGAATCAAAGCAATGCTGCCAACTTCAGAGGCATGGAAGGAAGGGTCATTGTGTATGA  
TGGAGCCTGCCTTGATCCGGAAAGAGGCCATATATGCTCATATTTGTTTAAAGTTTGAATCTGACTGCT  
GTTACTTCGGTCTTA  
+  
FFFFFFFFFFFFFFFFFFFFFFFFFFFFFFFFFFFFFFFFFFFFFFFFFFFFFFFFFFFFFFFF:FFFFFF  
FFFFFFFFFFFFFFFFFFFFFFFFFFFFFFFFFFFFFFFFFFFFFFFFFFFFFFFFFFFFFFFF:FFFF  
FFFFFFFFF::FFFF  
@A01056:60:HMTK7DSXY:1:2218:13847:29168 1:N:0:TCCTTAGC+ACTCGATT  
TGCTGCCAACTTCAGAGGCATGGAAGGAAGGGTCATTGTGTATGATGGAGCCTGCCTTGATCCGGAA  
AGAGGCCATATATGCTCATATTTGTTTAAAGTTTGAATCTGACTGCTGTTACTTCGGTCTTAGACCTGA  
ACACTGCTTATCCAC  
+  
FFFFFFFFFFFFFFFFFFFFFFFFFFFFFFFFFFFFFFFFFFFFFFFFFFFFFFFFFFFFFFFF:FFFFFF  
FFFFFFFFFFFFFFFFFFFFFFFFFFFFFFFFFFFFFFFFFFFFFFFFFFFFFFFFFFFFFFFF:FFFF  
FFFFFFFFFFFFFFFF  
@A01056:60:HMTK7DSXY:1:1576:30951:13416 2:N:0:TCCTTAGC+ACTCGATT  
CGGAAAGAGGCCATATATGCTCATATTTGTTTAAAGTTTGAATCTGACTGCTGTTACTTCGGTCTTAGA  
CCTGAACACTGCTTATCCACCACAGATGCCAACCTGGCAAAGAGATTTAGATTTTCGTGTGGACTTTGA  
TTGCCACAGTATGA  
+  
FFFFFFFFFFFFFFFFFFFFFFFFFFFFFFFFFFFFFFFFFFFFFFFFFFFFFFFFFFFFFFFF:FFFFFF  
FFFFFFFFFFFFFFFFFFFFFFFFFFFFFFFFFFFFFFFFFFFFFFFFFFFFFFFFFFFFFFFF:FFFF:FFFF  
FFFFFFFFFFFFFFFF  
@A01056:60:HMTK7DSXY:1:1528:3965:5666 2:N:0:TCCTTAGC+ACTCGATT  
CGGAAAGAGGCCATATATGCTCATATTTGTTTAAAGTTTGAATCTGACTGCTGTTACTTCGGTCTTAGA  
CCTGAACACTGCTTATCCACCACAGATGCCAACCTGGCAAAGAGATTTAGATTTTCGTGTGGACTTTGA  
TTGCCACAGTATGA  
+  
FFFFFFFFFFFFFF:FFFFFFFFFFFFFFFFFFFFFFFFFFFFFFFFFFFFFFFFFFFFFFFF  
FFFFFFFFFFFFFFFFFFFFFFFFFFFFFFFFFFFFFFFFFFFFFFFFFFFFFFFF:FFF:FFFFFFFF:F:FFFF  
FFFF:FFFF,FFFF  
@A01056:60:HMTK7DSXY:1:2521:2636:10285 2:N:0:TCCTTAGC+ACTCGATT  
GGAAAGAGGCCATATATCCTCATATTTGTTTAAAGTTTGAATCTGACTGCTGTTACTTCGGTCTTAGAC  
CTGAACACTGCTTATCCACCACAGATGCCAACCTGGCAAAGAGATTTAGATTTTCGTGTGGACTTTGAT  
TGCCACAGTATGAA

+  
FFFFFFFF, FFFFFFFFFFFFFFFFFFFFFFFFFFFFFFFFFFFFFFFFFFFFFFFFFFFFFFFFFF  
FFFFFFFFFFFFFFFFFFFFFFFFFFFFFFFFFFFFFFFFFFFFFFFFFFFFFFFFFFFFFFFFFFFF:F  
FF: FFFFFFFFFFFFFF  
@A01056:60:HMTK7DSXY:1:2548:15266:10488 2:N:0:TCCTTAGC+ACTCGATT  
GAAAGAGGCCATATATGCTCATATTTGTTTAAGTTTGAATCTGACTGCTGT TACTTCGGTCTTAGACC  
TGAACACTGCTTATCCACCACAGATGCCAACCTGGCAAAGAGATTTAGATTTCTGTGTGGACTTTGATT  
CCCCACAGTATGAAC  
+  
FF: FFFFFFFFFFFFFFFFFFFFFFFFFFFFFFFFFFFFFFFFFFFFFFFFFFFFFFFFFFFFFFFF  
FFFFFFFFFFFFFFFFFFFFFFFFFFFFFFFFFFFFFFFFFFFFFFFFFFFFFFFFFFFFFFFFFFFF:F  
FFFFFFFFFFFFFFFFFFFF, FFFFFFFFFFFFFFFFFFFFFFFFFFFFFFFFFFFFFF:F  
FFFFFFFFFFFFFFFFFFFF  
@A01056:60:HMTK7DSXY:1:1576:30951:13416 1:N:0:TCCTTAGC+ACTCGATT  
AAAGAGGCCATATATGCTCATATTTGTTTAAGTTTGAATCTGACTGCTGT TACTTCGGTCTTAGACCT  
GAACACTGCTTATCCACCACAGATGCCAACCTGGCAAAGAGATTTAGATTTCTGTGTGGACTTTGATTG  
CCCACAGTATGAACA  
+  
FFFFFFFFFFFFFFFFFFFFFFFFFFFFFFFFFFFFFFFFFFFFFFFFFFFFFFFFFFFFFFFFFFFF:F  
FFFFFFFFFFFFFFFFFFFFFFFFFFFFFFFFFFFFFFFFFFFFFFFFFFFFFFFFFFFFFFFFFFFFF  
FFFFFFFFFFFFFFFFFFFF  
@A01056:60:HMTK7DSXY:1:1528:3965:5666 1:N:0:TCCTTAGC+ACTCGATT  
GAGGCCATATATGCTCATATTTGTTTAAGTTTGAATCTGACTGCTGT TACTTCGGTCTTAGACCTGAA  
CACTGCTTATCCACCACAGATGCCAACCTGGCAAAGAGATTTAGATTTCTGTGTGGACTTTGATTGCC  
ACAGTATGAACAGGA  
+  
FFFFFFFFFFFFFFF: FFFFFFFFFFFFFFFF: FFFFFFFF: FFFFFFFFFFFFFFFFFFFFFFFFFFFFFF  
FFFFFFFFFFFFFFFFFFFFFFFFFFFFFFFFFFFFFFFFFFFFFFFFFFFFFFFFFFFFFFFFFFFFF  
FFFFFFFFFFFFFFFFFFFF  
@A01056:60:HMTK7DSXY:1:2521:2636:10285 1:N:0:TCCTTAGC+ACTCGATT  
AGGCCATATATCCTCATATTTGTTTAAGTTTGAATCTGACTGCTGT TACTTCGGTCTTAGACCTGAAC  
ACTGCTTATCCACCACAGATGCCAACCTGGCAAAGAGATTTAGATTTCTGTGTGGACTTTGATTGCCCA  
CAGTATGAACAGGAC  
+  
FFFFFFF: FFF:, FFFFFFFFFFFFFFFFFF: FFFFFFFFFFFFFFFFFFFFFFFFFFFFFFFFFFFFFF  
FFFFFFFFFFFFFFFFFFFFFFFFFFFFFFFFFFFFFFFFFFFFFFFFFFFFFFFFFFFFFFFFFFFFF  
FFFFFFFFFFFFFFFFFFFF  
@A01056:60:HMTK7DSXY:1:2548:15266:10488 1:N:0:TCCTTAGC+ACTCGATT  
AGGCCATATATGCTCATATTTGTTTAAGTTTGAATCTGACTGCTGT TACTTCGGTCTTAGACCTGAAC  
ACTGCTTATCCACCACAGATGCCAACCTGGCAAAGAGATTTAGATTTCTGTGTGGACTTTGATTGCCCA  
CAGTATGAACAGGAC  
+  
FFFFFFF:: FFFFFFFF: FFFFFFFFFFFFFFFFFFFFFFFFFFFFFFFFFFFFFF: FFFFFFFFFFFFFFFFFFFFFF  
FFFFFFFFFFFFFFFFFFFFFFFFFFFFFFFFFFFFFFFFFFFFFFFFFFFFFFFFFFFFFFFFFFFFF  
FFFFFFFFFFFFFFFFFFFF  
@A01056:60:HMTK7DSXY:1:2150:30391:18928 2:N:0:TCCTTAGC+ACTCGATT  
CTTCGGTCTTAGACCTGAACACTGCTTATCCACCACAGATGCCAACCTGGCAAAGAGATTTAGATTTCT  
GTGTGGACTTTGATTGCCACAGTATGAACAGGACACTGAGTTGTTTGCTCTTGACATTGGCGTGGCC  
TACAGATGCGTCAAT  
+  
FFFFFFFFFFFFFFFFFFFFFFFFFFFFFFFFFFFFFFFFFFFFFFFFFFFFFFFFFFFFFFFFFFFF, FFFFFFFFFFFFFFFFFFFFFFFFFFFFFF  
FFFFFFFFFFFFFFFFFFFFFFFFFFFFFFFFFFFF, FFF, F: FFFFFFFFFFFFFF: FFFFFFFF: FFFFFFFFFFFFFFFFFFFFFF  
FFFFFFFFFFFFFFFFFFFF  
@A01056:60:HMTK7DSXY:1:2414:25509:35650 2:N:0:TCCTTAGC+ACTCGATT  
GAGATTTAGATTTCTGTGTGGACTTTGATTGCCACAGTATGAACAGGACACTGAGTTGTTTGCTCTTG





@A01056:60:HMTK7DSXY:1:2234:4444:24158 2:N:0:TCCTTAGC+ACTCGATT  
GTTCCAAACATGCATGTGCGAAAAGAGACTGTTCCAGAGGTGACAAGATTAGAAGGTCACGCTCGATTTC  
TGCAAAAAGGGGGCCAAACTCGAAACCGCAGGAAAAGAGAGGATTTAGGTCCCTCTCAGCTAGAATTG  
AAAGATTCGGAGAAA

@A01056:60:HMTK7DSXY:1:2566:13747:5259 2:N:0:TCCTTAGC+ACTCGATT  
GTCGAAAAGAGACTGTTTCAGAGGTGACAAGATTAGAAGGTCACGCTCGATTTCTGCAAAAAGGGGGCC  
AAACTCGAAACCGCAGGAAAAGAGAGGATTTAGGTCCCTCTCAGCTAGAATTGAAAGATTCGGAGAAA  
ATGAGTTTGGAAGAC

@A01056:60:HMTK7D5XY:1:1566:13575:15233 2:N:0:TCCTTAGC+ACTCGATT  
GTCGAAAAGAGACTGTT CAGAGGTGACAAGATTAGAAGGTCACGCTCGATTTCTGCAAAAAGGGGGCC  
AAACTCGAAACCGCAGGAAAAGAGAGGATTTAGGTCCCTCTCAGCTAGAATTGAAAGATTCGGAGAAA  
ATGAGTTTGGAAGAC

@A01056:60:HMTK7DSXY:1:1566:13657:2691 2:N:0:TCCTTAGC+ACTCGATT  
GTCGAAAAGAGACTGTTTCAGAGGTGACAAGATTAGAAGGTCACGCTCGATTTCTGCAAAAAGGGGGCC  
AAACTCGAAACCGCAGGAAAAGAGAGGATTTAGGTCCCTCTCAGCTAGAATTGAAAGATTCGGAGAAA  
ATGAGTTTGGAAGAC

@A01056:60:HMTK7DSXY:1:2234:4444:24158 1:N:0:TCCTTAGC+ACTCGATT  
AAAGAGACTGTTCAGAGGTGACAAGATTAGAAGGTCACGCTCGATTTCTGCAAAAAGGGGGCCAAACT  
CGAAACCGCAGGAAAAGAGAGGATTTAGGTCCTCTCAGCTAGAATTGAAAGATTGCGAGAAAATGAG  
TTTGAAGACGTGCT

@A01056:60:HMTK7DSXY:1:1607:26738:4398 2:N:0:TCCTTAGC+ACTCGATT  
GTGACAAGATTAGAAGGTCACGCTCGATTTCTGCAAAAAGGGGGCCAAACTCGAAACCGCAGGAAAAG  
AGAGGATTTAGGTCCCTCTCAGCTAGAATTGAAAGATTCGGAGAAAATGAGTTTGAAGACGTGAGAT  
CGGAAGAGCGTCGTG

@A01056:60:HMTK7DSXY:1:2566:13747:5259 1:N:0:TCCTTAGC+ACTCGATT  
GATTAGAAGGTCACGCTCGATTTCTGCAAAAAGGGGGCCAAACTCGAAACCGCAGGAAAAAGAGAGGAT  
TTAGGTCCCTCTCAGCTAGAATTGAAAGATTGCGAGAAAATGAGTTTGGAAGACGTGCTTCAACAAGC  
GAGGCGCCACCGGGT

FFFFFFFFFFFFFFFFFFFFFFFFFFFFFFFFFFFFFFFFFFFFFFFFFFFFFFFFFFFFFFFFFFFFFFFF  
FFFFFFFFFFFFFFFF

@A01056:60:HMTK7DSXY:1:1566:13575:15233 1:N:0:TCCTTAGC+ACTCGATT  
GATTAGAAGGTCACGCTCGATTTCTGCAAAAAGGGGGCCAAACTCGAAACCGCAGGAAAAGAGAGGAT  
TTAGGTCCCTCTCAGCTAGAATTGAAAGATTCCGAGAAAATGAGTTTGGAAGACGTGCTTCAACAAGC  
GAGGCGCCACCGGGT

+

FFFFFFFFFFFFFFFFFFFFFFFFFFFFFFFFFFFFFFFFFFFFFFFFFFFFFFFFFFFFFFFFFFFFFFFF  
FFFFFFFFFFFFFFFFFFFFFFFFFFFFFFFFFFFFFFFFFFFFFFFFFFFFFFFFFFFFFFFFFFFFFFFF  
FFFFFFFFFFFFFFFF

@A01056:60:HMTK7DSXY:1:1566:13657:2691 1:N:0:TCCTTAGC+ACTCGATT  
GATTAGAAGGTCACGCTCGATTTCTGCAAAAAGGGGGCCAAACTCGAAACCGCAGGAAAAGAGAGGAT  
TTAGGTCCCTCTCAGCTAGAATTGAAAGATTCCGAGAAAATGAGTTTGGAAGACGTGCTTCAACAAGC  
GAGGCGCCACCGGGT

+

FFFFFFFFFFFFFFFFFFFFFFFFFFFFFFFFFFFFFFFFFFFFFFFFFFFFFFFFFFFFFFFFFFFFFFFF  
FFFFFFFFFFFFFFFFFFFFFFFFFFFFFFFFFFFFFFFFFFFFFFFFFFFFFFFFFFFFFFFFFFFFFFFF  
FFFFFFFFFFFFFFFF

@A01056:60:HMTK7DSXY:1:2275:24415:13213 2:N:0:TCCTTAGC+ACTCGATT  
CTCGAAACCGCAGGAAAAGAGAGGATTTAGGTCCCTCTCAGCTAGAATTGAAAGATTCCGAGAAAATG  
AGTTTGGAAGACGTGCTTCAACAAGCGAGGCGCCACCGGGTAGGAGTGTATCTTTGGAAGACGCATAT  
AGACCCGGCAAAGGA

+

FFFFFFFFFFFFFFFFFFFFFFFFFFFFFFFFFFFFFFFFFFFFFFFFFFFFFFFFFFFFFFFFFFFFFFFF  
FFFFFFFFFFFFFFFFFFFFFFFFFFFFFFFFFFFFFFFFFFFFFFFFFFFFFFFFFFFFFFFFFFFFFFFF  
FFFFFFFFFFFFFFFF

@A01056:60:HMTK7DSXY:1:2275:24415:13213 1:N:0:TCCTTAGC+ACTCGATT  
GTATCTTTGGAAGACGCATATAGACCCGGCAAAGGAACTTCTGACGGTTCTCCCCCTGAAGGGTTTA  
AGGAAGGTGAAAGCTTTGAAGGCAAAGAGCTTTACCTTCTTCTTGAACCATTATTGTAAATATTTA  
TTTGGTAATATTGCT

+

F:F:FFFFFFFFFFFFFFFFFFFFFFFFFFFFFFFFFFFFFFFFFFFFFFFFFFFFFFFFFFFFFFFF  
FFFFFFFFFFFFFFFFFFFFFFFFFFFFFFFFFFFFFFFFFFFFFFFFFFFFFFFFFFFFFFFFFFFFFFFF  
FFFFFFFFFFFFFFFF

@A01056:60:HMTK7DSXY:1:2110:21856:23156 2:N:0:TCCTTAGC+ACTCGATT  
TATTGCTGTTTTCGGGTCATCTGATAAGACCCAGTTTCCTGCTGTTGGATTTGATACCCCTCCGGTTC  
ATTACAATTTGACAACGATCCCGAAAGAAGGGGAACTGAAGAGCAAAGAAGGCCAGAGAGGGTTCG  
TCTGGCGAAAAACA

+

FFFFFFFFFFFFFFFFFFFFFFFFFFFFFFFFFFFFFFFFFFFFFFFFFFFFFFFFFFFFFFFFFFFFFFFF  
FFFFFFFFFFFFFFFFFFFFFFFFFFFFFFFFFFFFFFFFFFFFFFFFFFFFFFFFFFFFFFFFFFFFFFFF  
FFFFFFFFFFFFFFFF

@A01056:60:HMTK7DSXY:1:1309:4851:7420 2:N:0:TCCTTAGC+ACTCGATT  
GCTGTTTTCGGGTCATCTGATAAGACCCAGTTTCCTGCTGTTGGATTTGATACCCCTCCGGTTCATTA  
CAATTTGACAACGATCCCGAAAGAAGGGGAACTGAAGAGCAAAGAAGGCCAGAGAGGGTTCGTCTG  
GCGAAAAACA

+

F:FFFFFFFFFFFFFFFFFFFFFFFFFFFFFFFFFFFFFFFFFFFFFFFFFFFFFFFFFFFFFFFF  
FFFFFFFFFFFFFFFFFFFFFFFFFFFFFFFFFFFFFFFFFFFFFFFFFFFFFFFFFFFFFFFFFFFFFFFF  
FFFFFFFF:F:FFFFF

@A01056:60:HMTK7DSXY:1:1309:4851:7420 1:N:0:TCCTTAGC+ACTCGATT  
CCTGCTGTTGGATTTGATACCCCTCCGGTTCATTACAATTTGACAACGATCCCGAAAGAAGGGGAAAC  
TGAAGAGCAAAGAAGGCCAGAGAGGGTTCGTCTGGCGAAAAACAATAATTTGGAGAATCGACTTGT  
CAAATGTTGTACCTG

+  
FFFFFFFFFFFFFFFFFFFFFFFFFFFFFFFFFFFFFFFFFFFFFFFFFFFFFFFFFFFFFFFFFFFFFFFF  
FFFFFFFFFFFFFFFFFFFFFFFFFFFFFFFFFFFFFFFFFFFFFFFFFFFFFFFFFFFFFFFFFFFFFFFF  
FFFFFFFFFFFFFFFF  
@A01056:60:HMTK7DSXY:1:1440:9661:31093 2:N:0:TCCTTAGC+ACTCGATT  
CTGCTGTTGGATTTGATACCCCTCCGGTTCATTACAATTTGACAACGATCCCGAAAGAAGGGGAACT  
GAAGAGCAAAGAAGGCCAGAGAGGGTTCGTCTGGCGAAAAAACAAAATTTGGAGAATCGACTTGTC  
AAATGTTGTACCTGA  
+  
:FF:,FFF,FFFFFFFFFFFFFFFFFFFFFFFFFFFFFFFFFFFFFFFFFFFFFFFFFFFFFFFFFFFF:FF:FFFFFF:FFF:FFFF:F  
FFFFFFFFF:FFFFFFFF:FFFFFFFFFFFFFF,FFFFFFFFFFFFFFFFFFFFFFFF:FFFFFFFFF:FFFF  
FFF:F:F,F,:FFF  
@A01056:60:HMTK7DSXY:1:1567:6008:11772 2:N:0:TCCTTAGC+ACTCGATT  
GGGAACTGAAGAGCAAAGAAGGCCAGAGAGGGTTCGTCTGGCGAAAAAACAAAATTTGGAGAATC  
GACTTGTCAAATGTTGTACCTGAATTGAAAACCTTTGCTGCCACTTCTAGGCAGAACTCTTTGAATGA  
ATGTACATTCAGAAA  
+  
FFF:FFF:FFFF:FFFFFFFFFFFFFFFFFFFFFFFF:FFFFFFFFFFFFFFFFFFFFFFFFFFFFFFFF  
FFFFFFFFF:,FFFFFFF,:FFF,FFFFFFFFFFFFFFFF,FFFFFFFF:FFFFFFF,FFFFFFFFF:  
FFFF:FF:FFFFFF  
@A01056:60:HMTK7DSXY:1:1518:27588:34303 2:N:0:TCCTTAGC+ACTCGATT  
GGGAACTGAAGAGCAAAGAAGGCCAGAGCGGGTTCGTCTGGCGAAAAAACAAAATTTGGAGAATC  
GACTTGTCAAATGTTGTACCTGAATTGAAAACCTTTGCTGCCACTTCTAGGCAGAACTCTTTGAATGA  
ATGTACATTCAGAAA  
+  
FFF:FFFFFFFFFFFFFFFFFFFFFFFF:FFFFF:F,FFFFFFFFFFFFFFFFFFFFFFFF:FFFFFF:F:FFFFFFFFF  
FFFFFFFF,FFFFFFFF,FF,:FF::F:FFFF:FF::FFFFFFFF:F:F,F:FFFF:FFFFFF:FFFF  
,F,FFFF:FF:FF:F  
@A01056:60:HMTK7DSXY:1:2337:18240:21621 2:N:0:TCCTTAGC+ACTCGATT  
GGGAACTGAAGAGCAAAGAAGGCCAGAGAGGGTTCGTCTGGCGAAAAAACAAAATTTGGAGAATC  
GACTTGTCAAATGTTGTACCTGAATTGAAAACCTTTGCTGCCACTTCTAGGCAGAACTCTTTGAATGA  
ATGTACATTCAGAAA  
+  
FFFFFFFFFFFFFFFFFFFFFFFFFFFFFFFFFFFFFFFFFFFFFFFFFFFFFFFFFFFFFFFFFFFFFFFF,FFFFF:FFFF  
FFFFFFFFFFFFFF::FFFFFFFFF:FFFFF,FFF:FFF:FFFFFF:FFFFFFF,FFFFFF,:FFF:  
FFFFFF:FFF,FFFF  
@A01056:60:HMTK7DSXY:1:1165:4707:8422 2:N:0:TCCTTAGC+ACTCGATT  
TGAAGAGCAAAGAAGGCCAGAGAGGGTTCGTCTGGCGAAAAAACAAAATTTGGAGAATCGACTTGT  
CAAATGTTGTACCTGAATTGAAAACCTTTGCTGCCACTTCTAGGCAGAACTCTTTGAATGAATGTACA  
TTCAGAAAGCTTTGT  
+  
FFFFFFFFFFFFFFFFFFFFFFFFFFFFFFFFFFFFFFFFFFFFFFFFFFFFFFFFFFFFFFFFFFFFFFFF::F  
FFFFFFFFFFFFFFFFFFFFFFFF:F,FFFFFFFFFFFFFFFFFFFFFFFFFFFFFFFFFFFFFFFF:FFFFFFFF  
FFFFFFFFF:FFF:  
@A01056:60:HMTK7DSXY:1:1165:5556:18474 2:N:0:TCCTTAGC+ACTCGATT  
TGAAGAGCAAAGAAGGCCAGAGAGGGTTCGTCTGGCGAAAAAACAAAATTTGGAGAATCGACTTGT  
CAAATGTTGTACCTGAATTGAAAACCTTTGCTGCCACTTCTAGGCAGAACTCTTTGAATGAATGTACA  
TTCAGAAAGCTTTGT  
+  
FFFFFFFFFFFFFFFFFFFFFFFFFFFFFFFFFFFFFFFFFFFFFFFFFFFFFFFFFFFFFFFFFFFFFFFF:FFFFFFFFFFFFFFFFFFFFFFFF  
FFFFFFFFFFFFFFFFFFFFFFFF:FFFFFFF:FFFFFFFFFFFF:FFF:FFFFFFFFFFFFFFFFFFFFFFFF  
FFFFFFFFFFFF:FFFF  
@A01056:60:HMTK7DSXY:1:2478:24957:32847 2:N:0:TCCTTAGC+ACTCGATT  
GTTCTGTGGCGAAAAAACAAAATTTGGAGAATCGACTTGTCAAATGTTGTACCTGAATTGAAAACC

+

+

 $+$ 

+

+

+

+

[illegible]

$+$ 

+

+

+

+

+

+

@A01056:60:HMTK7DSXY:1:2337:18240:21621 1:N:0:TCCTTAGC+ACTCGATT  
GGACAAAAAGGGTTTTTGGAGCAGGTTCTGGAGGGTAACCTGGAAGTGGAGGGTTAGGAGTCGTGTGA  
AATTCGCAAAATTGGTCGCGGTCTTGAGGTTGACATGCCTGCCTTTATACTTAAATAAAGGGTTCA  
CCCGGTTTTCTGTGC

@A01056:60:HMTK7DSXY:1:1518:27588:34303 1:N:0:TCCTTAGC+ACTCGATT  
GGACAAAAAGGGTTTTTGGAGCAGGTTTCGGAGGGTAACCTGGAAGTGGAGGGTTAGGAGTCGTGTGA  
AATTCGCAAAATTGGTCGCGTCTTGACAGTTGACATGCCTGCCTTTATACTTAAATAAAGGGTTCA  
CCCGGTTTTCTGTGC

```
,:FFFF:FFFFFF:F:FFFFFFFFFFFFFFFFFFFFFFFFFFFFFFFF:FFFFFFFFFFFFFFFFFFFFFFFF
FFFFFFFFFFFFFFFFFFFFFFFF:FFFFFFFFFFFFFFFFFFFFFFFF:FF:FFFF:F,F:FFFFFFFFFFFFFFFF
FFFFFFFFFFFFFFFF::F
```
