# Supplementary material for: First Detection and Molecular Characterization of Apple Stem Grooving Virus, Apple Chlorotic Leaf Spot Virus, and Apple Hammerhead Viroid in Loquat in Spain
Source: MDPI journal article supplement (doi:10.3390/plants10112293), 2021-10-25
Supplement: s1 [file s1]

[illegible]

@A00155:342:HHGFNDSXY:1:1212:22408:29340 2:N:0:GAACCTAG+TCCGCATA  
CGTGTGCTATAAGCTTTTTTAACAAGCCTCGCACTACTGTCACTTATCATGCTTATTGGCGCTATTCCCT  
ACAAATCTCGCCTTCTCTATAAACGGTATGTCTACGATGTGCCGGTACTGCCTGAACAATGCCC  
+  
FFFFFFFFFFFFFFFF:FFFFFFFFF:FFFFFFFFFFFFFFFFFFFFFFFFFFFFFFFFFFFFFFFFFFF:FFFFFFF:FFFFF  
FFFFFFFFFFFFFFFFFFFFFFFFFFFFFFFFFFFFFFFFFFFFFFFFFFFFFFFFFFFFFFFFFFFFFFFFFFF:FFFFF  
@A00155:342:HHGFNDSXY:1:2637:3558:28260 1:N:0:GAACCTAG+TCCGCATA  
TGTGCTATAAGCTTTTTTAACAAGCCTCGCACTACTGTCACTTATCATGCTTATTGGCGCTATTCCCTAC  
AAATCTCGCCTTCTCTATAAACGGTATGTCTACGATGTGCCGGTACTGCCTGAACAATGCCCTACCGT  
+  
FFFF, FFFFFFFF:FFFFFFFFFFFFFFFFFFFFFFFFFFFFFFFFFFFFFFFFFFFFFFFFFFFFFFFFFFF:FFFFFFF  
FFFFFFFFFFFFFFFFFFFFFFFFFFFFFFFFFFFFFFFFFFFFFFFFFFFFFFFFFFFFFFFFFFFFFFFFFFF:FFFFFFF  
@A00155:342:HHGFNDSXY:1:1212:22408:29340 1:N:0:GAACCTAG+TCCGCATA  
ATAAGCTTTTTTAACAAGCCTCGCACTACTGTCACTTATCATGCTTATTGGCGCTATTCCCTACAAATCT  
CGCCTTCTCTATAAACGGTATGTCTACGATGTGCCGGTACTGCCTGAACAATGCCCTACCGTATGCAT  
+  
FFFFFFFFFFFFFFFFFFFFFFFFFFFFFFFFFFFFF:FFFFFFFFFFFFFFFFF:FFFFFFFFFF:FFFFFFFFFFFFF  
FFFFFFFFFFFFFFFFF:FFFFFFFFFFFFFFFFFFFFF:FFFFFFFFFFFFFFFFFFFFFFFFFFFFFFFFFFFFF  
@A00155:342:HHGFNDSXY:1:1369:23113:4789 1:N:0:GAACCTAG+TCCGCATA  
AGCTTTTTTAACAAGCCTCGCACTACTGTCACTTATCATGCTTATTGGCGCTATTCCCTACAAATCTCGC  
CTTCTCTATAAACGGTATGTCTACGATGTGCCGGTACTGCCTGAACAATGCCCTACCGTATGCATACC  
+  
FFFFFFFFFFFFFFF:FFFFFFFFFFF:FFFFFFFFFFFFFFFFFFFFFFFFFFFFFFFFFFFFFFFFFFFFFFFFFFF  
F, FFFFFFFFFFFFFFFFFFFFFFFFFFFFFFFFFFFFFFFFFFFFFFFFFFFFFFFFFFFFFFFFFFFF:FFFFFFFFFFF:FFFF, FFFF  
@A00155:342:HHGFNDSXY:1:2637:3558:28260 2:N:0:GAACCTAG+TCCGCATA  
AGCTTTTTTAACAAGCCTCGCACTACTGTCACTTATCATGCTTATTGGCGCTATTCCCTACAAATCTCGC  
TTCTCTATAAACGGTATGTCTACGATGTGCCGGTACTGCCTGAACAATGCCCTACCGTATGCATACC  
+  
FFFFFFFFFFFFFFFFFFFFFFFFFFFFFFFFFFFFFFFFFFFFFFFFFFFFFFFFFFFFFFFFFFFFFFFFFFFFFFFFFFF  
FFFFFFFFFFFFFFFFF:FF:FFFFFFFFF:FFFFFFFFFFFFFFFFFFFFFFFFFFFFFFFFFFFFFFFFFFF:FFFFFFFFF:FFFFFFFFF  
@A00155:342:HHGFNDSXY:1:1501:7057:3255 2:N:0:GAACCTAG+TCCGCATA  
GCTTTTTTAACAAGCCTCGCACTACTGTCACTTATCATGCTTATTGGCGCTATTCCCTACAAATCTCGCC  
TTCTCTATAAACGGTATGTCTACGATGTGCCGGTACTGCCTGAACAATGCCCTACCGTATGCATACCT  
+  
FF:FFFFFFFFFFFFFFFFFFFFFFFFFFFFFFFFFFFFFFFFFFFFFFFFFFFFFFFFFFFFFFFFFFFFFFFFFFFFFFFFFFF  
:F:F:FFFFFFFFFFFFFFFFFFFFFFFFFFFFFFFFFFFFFFFFFFFFFFFFFFF:FFFFFFFFFFFFFFFFFFFFFFFFFFFFF  
@A00155:342:HHGFNDSXY:1:1369:23113:4789 2:N:0:GAACCTAG+TCCGCATA  
AACAAGCCTCGCACTACTGTCACTTATCATGCTTATTGGCGCTATTCCCTACAAATCTCGCCTTCTCTA  
TAAACGGTATGTCTACGATGTGCCGGTACTGCCTGAACAATGCCCTACCGTATGCATACCTCCCTACG  
+  
FFFFFFFFFFFFFFFFF:FF:FFFFF:FFFFFFFFFFFFFFFFFFFFFFFFFFFFFFFFFFFFFFFFFFFFFFFFFFF:FFFFFFFFFFFFFFFFF:  
F:FFFFFFFFFFFFFFFFF:FF:FFFFFFFFFFFFFFFFFFFFFFFFFFFFFFFFFFFFFFFFFFFFFFFFFFF:FFFFFFFFFFFFFFFFFFFFF  
@A00155:342:HHGFNDSXY:1:2146:16812:19053 1:N:0:GAACCTAG+TCCGCATA  
CTTATCATGCTTATTGGCGCTATTCCCTACAAATCTCGCCTTCTCTATAAACGGTATGTCTACGATGTG  
CCGGTACTGCCTGAACAATGCCCTACCGTATGCATACCTCCCTACGGCCCGTACGTCTTCCA CT TGCA  
+  
FFFFFFFFFFFFFFFFFFFFFFFFFFFFFFFFFFFFFFFFFFFFFFFFFFFFFFFFFFFFFFFFFFFFFFFFFFFFFFFFFFF  
FFFFFFFFFFFFFFFFFFFFFFFFFFFFFFFFFFFFFFFFFFFFFFFFFFFFFFFFFFFFFFFFFFFFFFFFFFF  
@A00155:342:HHGFNDSXY:1:1173:24569:26349 1:N:0:GAACCTAG+TCCGCATA  
ATCATGCTTATTGGCGCTATTCCCTACAAATCTCGCCTTCTCTATAAACGGTATGTCTACGATGTGCCG  
TACTGCCTGAACAATGCCCTACCGTATGCATACCTCCCTACGGCCCGTACGTCTTCCA CT TGCA ACC  
+  
FFFFFFFFFFFFFFFFFFFFFFFFFFFFFFFFFFFFFFFFFFFFFFFFFFFFFFFFFFFFFFFFFFFFFFFFFFFFFFFFFFF  
FFFFFFFFFFFFFFFFFFFFFFFFFFFFFFFFFFFFFFFFFFFFFFFFFFFFFFFFFFFFFFFFFFFFFFFFFFF  
@A00155:342:HHGFNDSXY:1:1173:24569:26349 1:N:0:GAACCTAG+TCCGCATA  
ATCATGCTTATTGGCGCTATTCCCTACAAATCTCGCCTTCTCTATAAACGGTATGTCTACGATGTGCCG  
TACTGCCTGAACAATGCCCTACCGTATGCATACCTCCCTACGGCCCGTACGTCTTCCA CT TGCA ACC

@A00155:342:HHGFNDSXY:1:2556:14507:34006 1:N:0:GAACCTAG+TCCGCATA  
GGCGCTATTCCTACAAATCTCGCCTTCTCTATAAACGGTATGTCTACGATGTGCCGGTACTGCCTGAAC  
CAATGCCCTACCGTATGCATACCTCCCTACGGCCCGTACGTCTTCCACTTGCAACCACGTTTTG

+

FFFFFFFFFFFFFFFFFFFFFFFFFFFFFFFFFFFFFFFFFFFFFFFFFFFFFFFFFFFFFFFFFFFFFFFF  
FFFFFFFFFFFFFFFFFFFFFFFFFFFFFFFFFFFFFFFFFFFFFFFFFFFFFFFFFFFFFFFFFFFFFFFF

@A00155:342:HHGFNDSXY:1:1618:9146:3740 2:N:0:GAACCTAG+TCCGCATA  
GCGCTATTCCTACAAATCTCGCCTTCTCTATAAACGGTATGTCTACGATGTGCCGGTACTGCCTGAAC  
AATGCCCTACCGTATGCATACCTCCCTACGGCCCGTACGTCTTCCACTTGCAACCACG

+

FFFFFFFF:FFFFFFFFFFFFFFFFFFFFFFFFFFFFFFFFFFFFFFFFFFFFFFFFFFFFFFFFFFFF  
FF:FFFFFFFFFFFFFFFFFFFFFFFFFFFFFFFFFFFFFFFFFFFFFFFFFFFFFFFFFFFFFFFF

@A00155:342:HHGFNDSXY:1:2665:13268:19429 2:N:0:GAACCTAG+TCCGCATA  
GCGCTATTCCTACAAATCTCGCCTTCTCTATAAACGGTATGTCTACGATGTGCCGGTACTGCCTGAAC  
AATGCCCTACCGTATGCATACCTCCCTACGGCCCGTACGTCTTCCACTTGCAACCACG

+

FFFFFFFFFFFFFFFFFFFFFFFFFFFFFFFFFFFFFFFFFFFFFFFFFFFFFFFFFFFFFFFFFFFF:FFFF  
FFFFFFFFFFFFFFFFFFFFFFFFFFFFFFFFFFFFFFFFFFFFFFFFFFFFFFFFFFFFFFFFFFFF

@A00155:342:HHGFNDSXY:1:2451:4065:27320 2:N:0:GAACCTAG+TCCGCATA  
GCTATTCCTACAAATCTCGCCTTCTCTATAAACGGTATGTCTACGATGTGCCGGTACTGCCTGAACAA  
TGCCCTACCGTATGCATACCTCCCGACGGCCCGTACGTCTTCCACTTGCAACCACGTTTTGCGTGTA

+

FFFFF:FF:FF,FFFF,FFF:F::,FFFFFFFF:FF:FFFFFFFF:FFFFFFFF:FFF:FFFFF:  
FFFFF:FF,FFFF,FF,FFFFFF,,FFFFFFFF:FFFF:FFF,F,FFFFFFFF:FF,F::FFFFFFFF

@A00155:342:HHGFNDSXY:1:2451:4065:27320 1:N:0:GAACCTAG+TCCGCATA  
TATTCCTACAAATCTCGCCTTCTCTATAAACGGTATGTCTACGATGTGCCGGTACTGCCTGAACAATG  
CCCTACCGTATGCATACCTCCCTACGGCCCGTACGTCTTCCACTTGCAACCACGTTTTGCGTGTA

+

FFFFFFFFFFFFFFFFFFFFFFFFFFFFFFFFFFFFFFFFFFFFFFFFFFFFFFFFFFFFFFFFFFFF  
FFFFFFFFFFFFFFFFFFFFFFFFFFFFFFFFFFFFFFFFFFFFFFFFFFFFFFFFFFFFFFFFFFFF

@A00155:342:HHGFNDSXY:1:1173:24569:26349 2:N:0:GAACCTAG+TCCGCATA  
ATTCTACAAATCTCGCCTTCTCTATAAACGGTATGTCTACGATGTGCCGGTACTGCCTGAACAATGC  
CCTACCGTATGCATACCTCCCTACGGCCCGTACGTCTTCCACTTGCAACCACGTTTTGCGTGTA

+

F,FFFFFFFFFFFFFFFFFFFFFFFFFFFFFFFFFFFFFFFFFFFFFFFFFFFFFFFFFFFFFFFFFFFF  
FFFFFFFFFFFFFFFFFFFFFFFFFFFFFFFFFFFFFFFFFFFFFFFFFFFFFFFFFFFFFFFFFFFF

@A00155:342:HHGFNDSXY:1:2560:6732:35634 1:N:0:GAACCTAG+TCCGCATA  
ATTCTACAAATCTCGCCTTCTCTATAAACGGTATGTCTACGATGTGCCGGTACTGCCTGAACAATGC  
CCTACCGTATGCATACCTCCCTACGGCCCGTACGTCTTCCACTTGCAACCACGTTTTGCGTGTA

+

FFFFFFFFFFFFFFFF:FFFFFF:F,FFFFFF,,FFFFFFFF:FFFFFF:FFFFFF:F:FFFFFFFFFFFF  
FFFFFFFF:FFFFFF:,FFFFFF:F:FFFFFFFF:FFFFF:,FF:FF,FFF,,FFFF,FFF:FF

@A00155:342:HHGFNDSXY:1:2423:18276:3176 1:N:0:GAACCTAG+TCCGCATA  
TTCCTACAAATCTCGCCTTCTCTATAAACGGTATGTCTACGATGTGCCGGTACTGCCTGAACAATGCC  
CTACCGTATGCATACCTCCCTACGGCCCGTACGTCTTCCACTTGCAACCACGTTTTGCGTGTA

+

FFFFFFFFFFFFFFFFFFFFFFFFFFFFFFFFFFFFFFFFFFFFFFFFFFFFFFFFFFFFFFFFFFFF  
FFFFFFFFFFFFFFFFFFFFFFFFFFFFFFFFFFFFFFFFFFFFFFFFFFFFFFFFFFFFFFFFFFFF

@A00155:342:HHGFNDSXY:1:2572:6343:16673 1:N:0:GAACCTAG+TCCGCATA  
TCCTACAAATCTCGCCTTCTCTATAAACGGTATGTCTACGATGTGCCGGTACTGCCTGAACAATGCC  
TACCGTATGCATACCTCCCTACGGCCCGTACGTCTTCCACTTGCAACCACGTTTTGCGTGTA

+

FF:FFFFFFFFFFFFFFFFFFFFFFFFFFFFFFFFFFFFFFFFFFFFFFFFFFFFFFFFFFFFFFFF  
F:FFFFFFFFFFFFFFFF,F,FFF:FFF,FFFFFFFF:FFFFFFFFFFFF,FFFF:,F:F:FFFFF:

@A00155:342:HHGFNDSXY:1:1618:9146:3740 1:N:0:GAACCTAG+TCCGCATA  
TCCTACAAATCTCGCCTTCTCTATAAACGGTATGTCTACGATGTGCCGGTACTGCCTGAACAATGCCC  
TACCGTATGCATACCTCCCTACGGCCCCGTACGTCTTCCAATTGCAACCACGTTTTGCGTGTAAGTGA  
+  
FFFFFFFFFFFFFFFFFFFFFFFFFFFFFFFFFFFFFFFFFFFFFFFFFFFFFFFFFFFFFFFFFFFFFFFFFFFFF:FFFFFFFFFFFFFFFFFFFFFFFFFFFFFFFFFFFFFFFFFFFFFFFFFFFFFFFFFFFFFFFFFFFFFFFFFFFFF:  
FFFFFFFFFFFFFFFFFFFFFFFFFFFFFFFFFFFFFFFFFFFFFFFFFFFFFFFFFFFFFFFFFFFFFFFFFFFFFFFFFFFFFFFFFFFFFFFFFFFFFFFFFFFFFFFFFFFFFFFFFFFFFFFFFFFFFFFFFFFFFFFFFFFFFFFFFFFFFFFF  
@A00155:342:HHGFNDSXY:1:1603:13024:36479 1:N:0:GAACCTAG+TCCGCATA  
AAATCTCGCCTTCTCTATAAACGGTATGTCTACGATGTGCCGGTACTGCCTGAACAATGCCCTACCGT  
ATGCATACCTCCCTACGGCCCCGTACGTCTTCCAATTGCAACCACGTTTTGCGTGTAAGTGAAGCTGA  
+  
FFFFFFFFFFFFFF:FFFFFFFFFFFFFFFFFFFFFFFFFFFFFFFFFFFFFFFFFFFFFFFFFFFFFFFFFFFFFFFFFFFFFFFFFFFFFFFFFFFFFFFFFFFFFFFFFFFFFFFFFFFFFFFFFFFFFFFFFFFFFFFFFFFFFFFF  
FFFFFFFFFFFFFFFFFFFFFFFFFFFFFFFFFFFFFFFFFFFFFFFFFFFFFFFFFFFFFFFFFFFFFFFFFFFFFFFFFFFFFFFFFFFFFFFFFFFFFFFFFFFFFFFFFFFFFFFFFFFFFFFFFFFFFFFFFFFFFFFFFFFFFFFF  
@A00155:342:HHGFNDSXY:1:2665:13268:19429 1:N:0:GAACCTAG+TCCGCATA  
ATCTCGCCTTCTCTATAAACGGTATGTCTACGATGTGCCGGTACTGCCTGAACAATGCCCTACCGTAT  
GCATACCTCCCTACGGCCCCGTACGTCTTCCAATTGCAACCACGTTTTGCGTGTAAGTGAAGC  
+  
FFFFFFFFFFFF:FFFFFFFFFFFFFFFFFFFFFFFFFFFFFFFFFFFFFFFFFFFFFFFFFFFFFFFFFFFFFFFFFFFFFFFFFFFFFFFFFFFFFFFFFFFFFFFFFFFFFFFFFFFFFFFFFFFFFFFFFFFFFFFFFFFFFFFF  
FFFFFFFFFFFFFFFFFFFFFFFFFFFFFFFFFFFFFFFFFFFFFFFFFFFFFFFFFFFFFFFFFFFFFFFFFFFFFFFFFFFFFFFFFFFFFFFFFFFFFFFFFFFFFFFFFFFFFFFFFFFFFFFFFFFFFFFFFFFFFFFFFFFFFFFF  
@A00155:342:HHGFNDSXY:1:2277:23439:12305 2:N:0:GAACCTAG+TCCGCATA  
TCTCGCCTTCTCTATAAACGGTATGTCTACGATGTGCCGGTACTGCCTGAACAATGCCCTACCGTATG  
CATACCTCCCTACGGCCCCGTACGTCTTCCAATTGCAACCACGTTTTGCGTGTAAGTGAAGCTGACGT  
+  
FFFFFFFFFFFFFFFFFFFFFFFFFFFFFFFFFFFFFFFFFFFFFFFFFFFFFFFFFFFFFFFFFFFFFFFFFFFFFFFFFFFFFFFFFFFFFFFFFFFFFFFFFFFFFFFFFFFFFFFFFFFFFFFFFFFFFFFFFFFFFFFF  
FFFFFFFFFFFFFFFFFFFFFFFFFFFFFFFFFFFFFFFFFFFFFFFFFFFFFFFFFFFFFFFFFFFFFFFFFFFFFFFFFFFFFFFFFFFFFFFFFFFFFFFFFFFFFFFFFFFFFFFFFFFFFFFFFFFFFFFFFFFFFFFF  
@A00155:342:HHGFNDSXY:1:2556:14507:34006 2:N:0:GAACCTAG+TCCGCATA  
TTCTCTATAAACGGTATGTCTACGATGTGCCGGTACTGCCTGAACAATGCCCTACCGTATGCATACCT  
CCCTACGGCCCCGTACGTCTTCCAATTGCAACCACGTTTTGCGTGTAAGTGAAGCTGACGTCTAGTAG  
+  
FFFFF,F:FFFFFFFFFFFFFFFFFFFFFFFFFFFFFFFFFFFFFFFFFFFFFFFFFFFFFFFFFFFFFFFFFFFFFFFFFFFFFFFFFFFFFFFFFFFFFFFFFFFFFFFFFFFFFFFFFFFFFFFFFFFFFFFFFFFFFFFF  
FFFF,FFFFFFFFFFFFFFFFFFFFFFFFFFFFFFFFFFFFFFFFFFFFFFFFFFFFFFFFFFFFFFFFFFFFFFFFFFFFFFFFFFFFFFFFFFFFFFFFFFFFFFFFFFFFFFFFFFFFFFFFFFFFFFFFFFFFFFFFF  
@A00155:342:HHGFNDSXY:1:2277:23439:12305 1:N:0:GAACCTAG+TCCGCATA  
CTCTATAAACGGTATGTCTACGATGTGCCGGTACTGCCTGAACAATGCCCTACCGTATGCATACCTCC  
CTACGGCCCCGTACGTCTTCCAATTGCAACCACGTTTTGCGTGTAAGTGAAGCTGACGTCTAGTAGCC  
+  
FFFFFFFFFFFFFFFFFFFFFFFFFFFFFFFFFFFFFFFFFFFFFFFFFFFFFFFFFFFFFFFFFFFFFFFFFFFFFFFFFFFFFFFFFFFFFFFFFFFFFFFFFFFFFFFFFFFFFFFFFFFFFFFFFFFFFFFFFFFFFFFF  
FFFFFFFFFFFFFFFFFFFFFFFFFFFFFFFFFFFFFFFFFFFFFFFFFFFFFFFFFFFFFFFFFFFFFFFFFFFFFFFFFFFFFFFFFFFFFFFFFFFFFFFFFFFFFFFFFFFFFFFFFFFFFFFFFFFFFFFFFFFFFFFF  
@A00155:342:HHGFNDSXY:1:2560:6732:35634 2:N:0:GAACCTAG+TCCGCATA  
GGTATGTCTACGATGTGCCGGTACTGCCTGAACAATGCCCTACCGTATGCATACCTCCCTACGGCCCCG  
TACGTCTTCCAATTGCAACCACGTTTTGCGTGTAAGTGAAGCTGACGTCTAGTAGCCCTAGAGATAC  
+  
F,FFFFFF,FFFF:FFFF:FFFFFFFF,FF:FFFFFFFF,FFFFFFFFFFFFFFFFFFFFFFFFFFFFFFFF:F:FFF:,F  
FFFFFFFF:FFFFFF:FFFFFFFF:FFFF,FFF:FFFFFFFFFFFFFFFFFFFFFFFFFFFFFFFFFFFFFFFF,FFF  
@A00155:342:HHGFNDSXY:1:2150:4001:15624 1:N:0:GAACCTAG+TCCGCATA  
TATGTCTACGATGTGCCGGTACTGCCTGAACAATGCCCTACCGTATGCATACCTCCCTACGGCCCCGTA  
CGTCTTCCAATTGCAACCACGTTTTGCGTGTAAGTGAAGCTGACGTCTAGTAGCCCTAGAGATACTG  
+  
FFFFFFFFFFFFFFFFFFFFFFFFFFFFFFFFFFFFFFFFFFFFFFFFFFFFFFFFFFFFFFFFFFFFFFFFFFFFFFFFFFFFFFFFFFFFFFFFFFFFFFFFFFFFFFFFFFFFFFFFFFFFFFFFFFFFFFFF  
FFFFFFFFFFFFFFFFFFFFFFFFFFFFFFFFFFFFFFFFFFFFFFFFFFFFFFFFFFFFFFFFFFFFFFFFFFFFFFFFFFFFFFFFFFFFFFFFFFFFFFFFFFFFFFFFFFFFFFFFFFFFFFFFFFFFFFFFFFFFFFFF  
@A00155:342:HHGFNDSXY:1:2465:8874:32049 1:N:0:GAACCTAG+TCCGCATA  
TATGTCTACGATGTGCCGGTACTGCCTGAACAATGCCCTACCGTATGCATACCTCCCTACGGCCCCGTA  
CGTCTTCCAATTGCAACCACGTTTTGCGTGTAAGTGAAGCTGACGTCTAGTAGCCCTAGAGATACTG  
+  
FFFFFFFFFFFFFFFFFFFFFFFFFFFFFFFFFFFFFFFFFFFFFFFFFFFFFFFFFFFFFFFFFFFFFFFFFFFFFFFFFFFFFFFFFFFFFFFFFFFFFFFFFFFFFFFFFFFFFFFFFFFFFFFFFFFFFFFF  
FFFFFFFFFFFFFFFFFFFFFFFFFFFFFFFFFFFFFFFFFFFFFFFFFFFFFFFFFFFFFFFFFFFFFFFFFFFFFFFFFFFFFFFFFFFFFFFFFFFFFFFFFFFFFFFFFFFFFFFFFFFFFFFFFFFFFFFFFFFFFFFF  
@A00155:342:HHGFNDSXY:1:2150:4001:15624 1:N:0:GAACCTAG+TCCGCATA  
TATGTCTACGATGTGCCGGTACTGCCTGAACAATGCCCTACCGTATGCATACCTCCCTACGGCCCCGTA  
CGTCTTCCAATTGCAACCACGTTTTGCGTGTAAGTGAAGCTGACGTCTAGTAGCCCTAGAGATACTG

@A00155:342:HHGFNDSXY:1:1603:13024:36479 2:N:0:GAACCTAG+TCCGCATA  
TATGTCTACGATGTGCCGGTACTGCCTGAACAATGCCCTACCGTATGCATACCTCCCTACGGCCCGTA  
CGTCTTCCACTTGCAACCACGTTTTGCGTGTAAGCTGACGTCTAGTAGCCCTAGAGATACTG  
+  
FFFFFFFFFFFFFFFFFFFFFFFFFFFFFFFFFFFFFFFFFFFFFFFFFFFFFFFFFFFFFFFFFFFFFFFF:F  
FFFFFFFF:FFFFFFFFFFFFFFFFFFFFFFFFFFFFFFFFFFFFFFFFFFFFFFFFFFFFFFFFFFFFFFFF  
@A00155:342:HHGFNDSXY:1:1425:9010:2472 2:N:0:GAACCTAG+TCCGCATA  
GTACTGCCTGAACAATGCCCTACCGTATGCATACCTCCCTACGGCCCGTACGTCTTCCACGTGCAACC  
ACGTTTTGCGTGTAAGCTGACGTCTAGTAGCCCTAGAGATACTGTCTACTATCTGCTTCCTT  
+  
FF:FFFF,FFFF::F:FFFFFF:,FF:FFF,FFFF::F:FFFFFFFFFFFFFFFFFFFFFFFF,FFFFFF  
FF,:F:FFFF:F:FFFFFFFFFFFFFF,FFF:FFFFFF:F::FFFFFFFFFFFFFFFF:FFF:FFF::FF  
@A00155:342:HHGFNDSXY:1:2150:4001:15624 2:N:0:GAACCTAG+TCCGCATA  
GTACTGCCTGAACAATGCCCTACCGTATGCATACCTCCCTACGGCCCGTACGTCTTCCACTTGCAACC  
ACGTTTTGCGTGTAAGCTGACGTCTAGTAGCCCTAGAGATACTGTCTACTATCTGCTTCCTT  
+  
FFFFFFFFFFFFFFFFFFFFFFFF:FFFFFFFFFFFFFFFFFFFFFFFF:FFFFFFFFFFFFFFFFFFFFFFFF:FFFFFF  
FFFFFF:FFFFFFFFFFFFFFFFFFFFFFFFFFFFFFFFFFFFFFFFFFFFFFFFFFFFFFFFFFFFFFFF  
@A00155:342:HHGFNDSXY:1:1277:15600:22968 2:N:0:GAACCTAG+TCCGCATA  
GTACTGCCTGAACAATGCCCTACCGTATGCATACCTCCCTACGGCCCGTACGTCTTCCACTTGCAACC  
ACGTTTTGCGTGTAAGCTGACGTCTAGTAGCCCTAGAGATACTGTCTACTATCTGCTTCCTT  
+  
FFFFFFFF:FFFFFFFFFFFFFFFFFFFFFFFF:FFFFFFFFFFFFFFFF:F:FFFFFFFFFFFFFFFF,FFFFFF  
FFF:FFFFFF:FFFFFFFFFFFFFFFFFFFFFFFFFFFFFFFFFFFFFFFFFFFFFFFFFFFFFFFFFFFF  
@A00155:342:HHGFNDSXY:1:2465:8874:32049 2:N:0:GAACCTAG+TCCGCATA  
GTACTGCCTGAACAATGCCCTACCGTATGCATACCTCCCTACGGCCCGTACGTCTTCCACTTGCAACC  
ACGTTTTGCGTGTAAGCTGACGTCTAGTAGCCCTAGAGATACTGTCTACTATCTGCTTCCTT  
+  
FFFFFFFFFFFFFFFFFFFF:FFFF:FFFFFFFFFFFFFFFFFFFFFFFFFFFFFFFFFFFFFFFFFFFFFFFF:FFFFFF  
FFFFFFFFFFFFFFFFFFFFFFFFFFFFFFFFFFFFFFFFFFFFFFFFFFFFFFFFFFFFFFFFFFFFFFFF,FFFF  
@A00155:342:HHGFNDSXY:1:1425:9010:2472 1:N:0:GAACCTAG+TCCGCATA  
ACTGCCTGAACAATGCCCTACCGTATGCATACCTCCCTACGGCCCGTACGTCTTCCACTTGCAACCAC  
GTTTTGCGTGTAAGCTGCAAGCTGACGTCTAGTAGCCCTAGAGATACTGTCTACTATCTGCTTCCTTCC  
+  
FF:FFFFFFFFFFFF:FFFFFFFFFF:FF:FFFF:FFFFFFFFFFFFFFFF, :FFFF:FFF:F:FFFFFF  
F:FFFFFFFFFFFFFFFF:FFFF:FF,F:FFFF: :FFFFFFFFFFFFFFFFFFFF: :FFFFFF,FFF:  
@A00155:342:HHGFNDSXY:1:1277:15600:22968 1:N:0:GAACCTAG+TCCGCATA  
ACTGCCTGAACAATGCCCTACCGTATGCATACCTCCCTACGGCCCGTACGTCTTCCACTTGCAACCAC  
GTTTTGCGTGTAAGCTGCAAGCTGACGTCTAGTAGCCCTAGAGATACTGTCTACTATCTGCTTCCTTCC  
+  
FFFFFFFFFFFFFFFFFFFFFFFFFFFFFFFFFFFFFFFFFFFFFFFFFFFFFFFFFFFFFFFFFFFFFFFF  
FFFFFFFFFFFFFFFFFFFFFFFFFFFFFFFFFFFFFFFFFFFFFFFFFFFFFFFFFFFFFFFFFFFFFFFF:  
@A00155:342:HHGFNDSXY:1:2572:6343:16673 2:N:0:GAACCTAG+TCCGCATA  
ACAATGCCCTACCGTATGCATACCTCCCTACGGCCCGTACGTCTTCCACTTGCAACCACGTTTTGCGT  
GTAAGCTGCAAGCTGACGTCTAGTAGCCCTAGAGATACTGTCTACTATCTGCTTCCTTCCCTACGTACTC  
+  
FFFFFFFFFFFF:FFFFFFFFFFFF:FFFFFFFFFFFF,FFFFFFFFFFFFFFFFFFFFFFFFFFFFFFFF  
FFFFFFFFFFFFFFFFFFFFFFFFFFFFFFFFFFFFFFFF:FFFFFFFFFFFFFFFFFFFFFFFFFFFFFFFF:FFFFFF  
@A00155:342:HHGFNDSXY:1:2423:18276:3176 2:N:0:GAACCTAG+TCCGCATA  
CCCTACCGTATGCATACCTCCCTACGGCCCGTACGTCTTCCACTTGCAACCACGTTTTGCGTGTAAGCT  
GCAAGCTGACGTCTAGTAGCCCTAGAGATACTGTCTACTATCTGCTTCCTTCCCTACGTACTCACCGTA  
+  
FFFFFFFFFFFFFFFFFFFFFFFFFFFFFFFFFFFFFFFFFFFFFFFF:FFFFFFFFFFFFFFFFFFFFFFFF  
FFFFFFFFFFFFFFFFFFFFFFFFFFFFFFFF,FFF::FFFFFFFFFFFFFFFFFFFFFFFFFFFFFFFF:FF

@A00155:342:HHGFNDSXY:1:2265:20518:18584 1:N:0:GAACCTAG+TCCGCATA  
TACCGTATGCATACCTCCCTACGGCCCGTACGTCTTCCACTTGCAACCACGTTTTGCGTGTAAGTGA  
AGCTGACGTCTAGTAGCCCTAGAGATACTGTCTACTATCTGCTTCCTTCTACGTACTCACCGTATTG  
+  
FFFFFFFFFFFFFFFFFFFFFFFFFFFFFFFFFFFFFFFFFFFFFFFFFFFFFFFFFFFFFFFFFFFFFFFF  
FFFFFFFFFFFFFFFFFFFFFFFFFFFFFFFFFFFFFFFFFFFFFFFFFFFFFFFFFFFFFFFFFFFFFFFF  
@A00155:342:HHGFNDSXY:1:1221:24361:31187 1:N:0:GAACCTAG+TCCGCATA  
ACCGTATGCATACCTCCCTACGGCCCGTACGTCTTCCACTTGCAACCACGTTTTGCGTGTAAGTGA  
GCTGACGTCTAGTAGCCCTAGAGATACTGTCTACTATCTGCTTCCTTCTACGTACTCACCGTATTG  
+  
:FFFFFF::F:FFFFFF:FFFFFF:FFFFFFFFFFFF::FFFF:FF:FFFFFF,FFFF:FFFFFF,::  
::FFFF:FFFF:FFF:FFFF:FFFFFFFF:FF:FFFF:FF:,FF,F,F:FFFFFFFFFFFFFFFF::FF  
@A00155:342:HHGFNDSXY:1:2265:20518:18584 2:N:0:GAACCTAG+TCCGCATA  
TGCATACCTCCCTACGGCCCGTACGTCTTCCACTTGCAACCACGTTTTGCGTGTAAGTGAAGCTGAC  
GTCTAGTAGCCCTAGAGATACTGTCTACTATCTGCTTCCTTCTACGTACTCACCGTATTGCCTAACT  
+  
FFFFFFFFFFFFFFFFFFFFFFFFFFFFFFFFFFFFFFFFFFFFFFFFFFFFFFFFFFFFFFFFFFFFFFFF  
FFF:FFFFFFFFFFFFFFFFFFFFFFFFFFFFFFFFFFFFFFFFFFFFFFFFFFFFFFFFFFFFFFFFFFFF  
@A00155:342:HHGFNDSXY:1:2648:12301:15655 2:N:0:GAACCTAG+TCCGCATA  
ATACCTCCCTACGGCCCGTACGTCTTCCACTTGCAACCACGTTTTGCGTGTAAGTGAAGCTGACGTC  
TAGTAGCCCTAGAGATACTGTCTACTATCTGCTTCCTTCTACGTACTCACCGTATTGCCTAACTAGC  
+  
FFFFF:FFFFFFFFFFFFFFFFFFFF,FFFFFFFFFFFFFFFFFFFFFFFFFFFFFFFFFFFFFFFFFFFF:FFFFFFFF  
FFFFFFFFFFFFFFFFFFFF:FFFFFFFFFFFFFFFFFFFFFFFFFFFFFFFFFFFFFFFFFFFFFFFFFFFF  
@A00155:342:HHGFNDSXY:1:2544:24442:27508 1:N:0:GAACCTAG+TCCGCATA  
ACCTCCCTACGGCCCGTACGTCTTCCACTTGCAACCACGTTTTGCGTGTAAGTGAAGCTGACGTCTA  
GTAGCCCTAGAGATACTGTCTACTATCTGCTTCCTTCTACGTACTCACCGTATTGCCTAACTAGCAC  
+  
FFFFFFFFFFFFFFFFFFFFFFFFFFFFFFFFFFFFFFFFFFFFFFFFFFFFFFFFFFFFFFFFFFFF:FFFFFFFFFFFFFFFFFFFFFFFF  
FFFFFFFFFFFFFFFFFFFFFFFFFFFFFFFFFFFFFFFFFFFFFFFFFFFFFFFFFFFFFFFFFFFF:FFFFFFFFFFFFFFFFFFFFFFFF  
@A00155:342:HHGFNDSXY:1:1653:6976:34835 1:N:0:GAACCTAG+TCCGCATA  
ACCTCCCTACGGCCCGTACGTCTTCCACTTGCAACCACGTTTTGCGTGTAAGTGAAGCTGACGTCTA  
GTAGCCCTAGAGATACTGTCTACTATCTGCTTCCTTCTACGTACTCACCGTATTGCCTAACTAGCAC  
+  
FFFFFFFFFFFF:FFFFFFFFFFFFFFFFFFFFFFFFFFFFFFFFFFFFFFFFFFFF:FF:FFFFFF,FFFFFFFFFFFF:  
FFFFFFFFFFFFFFFFFFFFFFFFFFFFFFFFFFFFFFFFFFFFFFFFFFFFFFFFFFFFFFFFFFFF:FFF  
@A00155:342:HHGFNDSXY:1:2648:12301:15655 1:N:0:GAACCTAG+TCCGCATA  
CCTCCCTACGGCCCGTACGTCTTCCACTTGCAACCACGTTTTGCGTGTAAGTGAAGCTGACGTCTAG  
TAGCCCTAGAGATACTGTCTACTATCTGCTTCCTTCTACGTACTCACCGTATTGCCTAACTAGCACG  
+  
FFFFFFFFFFFFFFFFFFFFFFFFFFFFFFFFFFFFFFFFFFFFFFFFFFFFFFFFFFFFFFFFFFFF:FFFFFFFFFFFFFFFFFFFFFFFF  
FFFFFFFFFFFFFFFFFFFFFFFFFFFFFFFFFFFFFFFFFFFFFFFFFFFFFFFFFFFFFFFFFFFF:FFFFFFFFFFFFFFFFFFFFFFFF  
@A00155:342:HHGFNDSXY:1:1221:24361:31187 2:N:0:GAACCTAG+TCCGCATA  
CCCTACGGCCCGTACGTCTTCCACTTGCAACCACGTTTTGCGTGTAAGTGAAGCTGACGTCTAGTAG  
CCCTAGAGATACTGTCTACTATCTGCTTCCTTCTACGTACTCACCGTATTGCCTAACTAGCACGTTA  
+  
FFF:FFFFFF:FFFFF,FFFFFFFFFFFFFFFF,FFFFFFFFFFFFFFFFFFFFFFFFFFFFFFFFFFFF  
FF:FFFF:F:FFFFFFFFFFFFFFFFFFFFFFFFFFFFFFFFFFFF:FFFF:FFFFFFFFFFFFFFFF:FFFFFFFF  
@A00155:342:HHGFNDSXY:1:2672:6180:9815 2:N:0:GAACCTAG+TCCGCATA  
CGGCCCGTACGTCTTCCACTTGCAACCACGTTTTGCGTGTAAGTGAAGCTGACGTCTAGTAGCCCTA  
GAGATACTGTCTACTATCTGCTTCCTTCTACGTACTCACCGTATTGCCTAACTAGCACGTTAGCAT  
+  
FFFFFFFFFFFFFFFFFFFFFFFFFFFF:FFFFFFF,FFFFFFFFFFFFFFFFFFFFFFFFFFFFFFFFFFFF  
FFFFF:FFFFFFFFFFFFFFFFFFFF:FFFFFFF,FFFFF:FFFFFFFFFFFFFFFF:FFFFFFFFFFFF

@A00155:342:HHGFNDSXY:1:2672:6180:9815 1:N:0:GAACCTAG+TCCGCATA  
ACGTCTTCCACTTGCAACCACGTTTTGCGTGTAAGTGAAGCTGACGTCTAGTAGCCCTAGAGATACT  
GTCTACTATCTGCTTCCTCCTACGTA CTACCGTATTGCCTAACTAGCACGTTAGCATAGTCATATA  
+  
FFFFFFFFFFFFFFFFFFFFFFFFFFFFFFFFFFFFFFFFFFFFFFFFFFFFFFFFFFFFFFFFFFFFFFFFFFFFF, FFFFFFFFFFFFFFFFFFFFFFFFFFFFFFFFFFFFFFFFFFFFFFFFFFFFFFFFFFFFFFFFFFFFFFFFFFFFFF  
FFFFFFFFFFFFFFFFFFFFFFFFFFFFFFFFFFFFFFFFFFFFFFFFFFFFFFFFFFFFFFFFFFFFFFFFFFFFF: FFFFFFFFFFFFFFFFFFFFFFFFFFFFFFFFFFFFFFFFFFFFFFFFFFFFFFFFFFFFFFFFFFFFFFFFFFFFFF  
@A00155:342:HHGFNDSXY:1:1220:4010:25880 1:N:0:GAACCTAG+TCCGCATA  
CCTTCCTACGTA CTACCGTATTGCCTAACTAGCACGTTAGCATAGTCATATATTCTGGTCCTAGCT  
CACGTACCGATGCCCTTCTCTCTTTCTGCTCTTCATTATTGCTTCTTCATCTTCGTATTCTATCATC  
+  
FFFFFFF, FFFFFFFFFFFFFFFFFFFFFFFFFFFFFFFFFFFFFFFFFFFFFFFFFFFFFFFFFFFFFFFFFFFFFFFFFFFFFF  
FFFFFFFFFFFFFFFFFFFFFFFFFFFFFFFFFFFFFFFFFFFFFFFFFFFFFFFFFFFFFFFFFFFFFFFFFFFFF: FF: FFFFFFFFFFFFFFFFFFFFFFFFFFFFFFFFFFFFFFFFFFFFFFFFFFFFFFFFFFFFFFFFFFFFFFFFFFFFFF  
@A00155:342:HHGFNDSXY:1:1526:2709:32581 1:N:0:GAACCTAG+TCCGCATA  
CCTTCCTACGTA CTACCGTATTGCCTAACTAGCACGTTAGCATAGTCATATATTCTGGTCCTAGCT  
CACGTACCGATGCCCTTCTCTCTTTCTGCTCTTCATTATTGCTTCTTCATCTTCGTATTCTATCATC  
+  
FFFFFFFFFFFFFFFFFFFFFFFFFFFFFFFFFFFFFFFFFFFFFFFFFFFFFFFFFFFFFFFFFFFFFFFFFFFFFFFFFFFFF  
FFFFFFFFFFFFFFFFFFFFFFFFFFFFFFFFFFFFFFFFFFFFFFFFFFFFFFFFFFFFFFFFFFFFFFFFFFFFF: FFFFFFFFFFFFFFFFFFFFFFFFFFFFFFFFFFFFFFFFFFFFFFFFFFFFFFFFFFFFFFFFFFFFFFFFFFFFFF  
@A00155:342:HHGFNDSXY:1:1429:28944:7999 1:N:0:GAACCTAG+TCCGCATA  
CCTTCCTACGTA CTACCGTATTGCCTAACTAGCACGTTAGCATAGTCATATATTCTGGTCCTAGCT  
CACGTACCGATGCCCTTCTCTCTTTCTGCTCTTCATTATTGCTTCTTCATCTTCGTATTCTATCATC  
+  
FFFFFFFFFFFFFFFFFFFFFFFFFFFFFFFFFFFFFFFFFFFFFFFFFFFFFFFFFFFFFFFFFFFFFFFFFFFFFFFFFFFFF, FFFFFFFFFFFFFFFFFFFFFFFFFFFFFFFFFFFFFFFFFFFFFFFFFFFFFFFFFFFFFFFFFFFFFFFFFFFFFF  
FFFFFFFFFFFFFFFFFFFFFFFFFFFFFFFFFFFFFFFFFFFFFFFFFFFFFFFFFFFFFFFFFFFFFFFFFFFFF: FFFFFFFFFFFFFFFFFFFFFFFFFFFFFFFFFFFFFFFFFFFFFFFFFFFFFFFFFFFFFFFFFFFFFFFFFFFFFF  
@A00155:342:HHGFNDSXY:1:2403:7545:24518 1:N:0:GAACCTAG+TCCGCATA  
CCTTCCTACGTA CTACCGTATTGCCTAACTAGCACGTTAGCATAGTCATATATTCTGGTCCTAGCT  
CACGTACCGATGCCCTTCTCTCTTTCTGCTCTTCATTATTGCTTCTTCATCTTCGTATTCTATCATC  
+  
FFF:FF: FFFFFFFFFFFFFFFFFFFFFFFFFFFFFFFFFFFFFFFFFFFFFFFFFFFFFFFFFFFFFFFFFFFFFFFFFFFFFF: FFFFFFFF  
FFFFFFFFF: FFFFFFFF, : FFFFFFFF: F: FF: FFFFFFFF: FFFFF: FFF: FFFF, :, F: FFFFFFFFFFFFFFFFFFFFFFFFFFFFFFFFFFFFFFFFFFFFFFFFFFFFFFFFFFFFFFFFFFFFFFFFFFFFFF  
@A00155:342:HHGFNDSXY:1:1429:28944:7999 2:N:0:GAACCTAG+TCCGCATA  
CTTCCTACGTA CTACCGTATTGCCTAACTAGCACGTTAGCATAGTCATATATTCTGGTCCTAGCTC  
ACGTACCGATGCCCTTCTCTCTTTCTGCTCTTCATTATTGCTTCTTCATCTTCGTATTCTATCATCT  
+  
FFFFFFFFFFFFFFFFFFFFF: : FFFFFFFFFFFFFF: F: FFFFFFFFFFFFFFFFFFFFFF: F, FFFFFFFFFF: FFFFFFFFFFFFFF  
FFFFFFFFFFFFFFFFFFFFFFFFFFFFFFFFFFFFF, : FFFFFFFFFFFFFF, FFFFFFFFFFFFFFFFFFFFFFFFFFFFFFFFFFFFFFFFFFFFFFFFFFFFFFFFFFFFFFFFFFFFFFFFFFFFFF  
@A00155:342:HHGFNDSXY:1:2403:7545:24518 2:N:0:GAACCTAG+TCCGCATA  
CTTCCTACGTA CTACCGTATTGCCTAACTAGCACGTTAGCATAGTCATATATTCTGGTCCTAGCTC  
ACGTACCGATGCCCTTCTCTCTTTCTGCTCTTCATTATTGCTTCTTCATCTTCGTATTCTATCATCT  
+  
FFFFFFF, : : FFFFFFFFFFFFFF, FFFFFFFFFFFFFF: FFFFFFFFFFFFFFFFFFFFFFFFFFFFFFFFFFFFFF: F, FFFFFF: FFFFFFFFFFFFFF  
FFF: FFFFFFFFFF, FFFFFFFFFFFFFFFFFFFFFF: FFFFF: F: FFFF: FFFFFFFF: FFFFFFFFFFFFFFFFFFFFFFFFFFFFFFFFFFFFFF  
@A00155:342:HHGFNDSXY:1:1526:2709:32581 2:N:0:GAACCTAG+TCCGCATA  
TTCTACGTA CTACCGTATTGCCTAACTAGCACGTTAGCATAGTCATATATTCTGGTCCTAGCTCA  
CGTACCGATGCCCTTCTCTCTTTCTGCTCTTCATTATTGCTTCTTCATCTTCGTATTCTATCATCT  
+  
FFFFFFFFFFFFFFFFFFFFFFFFFFFFFFFFFFFFF: FFFFFFFF, FFFFFFFFFF: FFFFFFFFFFFFFFFFFFFFFFFFFFFFFFFFFFFFFF  
FFFFFFFFFFFFFFFFFFFFFFFFFFFFFFFFFFFFF: FFFFFFFFFFFFFFFFFFFFFFFFFFFFFFFFFFFFFF  
@A00155:342:HHGFNDSXY:1:2440:1714:26130 1:N:0:GAACCTAG+TCCGCATA  
CACCGTATTGCCTAACTAGCACGTTAGCATAGTCATATATTCTGGTCCTAGCTCACGTACCGATGCC  
CTTCTCTCTTTCTGCTCTTCATTATTGCTTCTTCATCTTCGTATTCTATCATCTCTTTATACAAATT  
+  
FFFFFFFFF, FFFF: : FFF: FFFFFFFFFF: FFFFFFFF, FFFF: FFFFFFFFFFFFFFFFFFFFFFFFFFFFFFFFFFFFFF: FFFF  
F: FFFFFFFFFFFFFFFFFFFFFF: : F: F: FF: FFF, : F, FFFFF: FFFFF: FF: FFF, : FFFF, FF: FFF, FFF

@A00155:342:HHGFNDSXY:1:2111:24460:3897 1:N:0:GAACCTAG+TCCGCATA  
CCGTATTGCCTAACTAGCACGTTAGCATAGTCATATATTCCTGGTCCTAGCTCACGTACCGATGCCCT  
TCTCTCTTTCTGCTCTTCATTCATTGCTTCTTCATCTTCGTATTCTATCATCTCTTT

+

FFFFFFFFFFFFFFFFFFFFFFFFFFFFFFFFFFFFFFFFFFFFFFFFFFFFFFFFFFFFFFFFFFFFFFFF:F,  
FFFFFFFFFFFFFFFFFFFFFFFFFFFFFFFFFFFFFFFFFFFFFFFFFFFFFFFFFFFFFFFFFFFFFFFF

@A00155:342:HHGFNDSXY:1:1126:23565:20885 1:N:0:GAACCTAG+TCCGCATA  
CCGTATTGCCTAACTAGCACGTTAGCATAGTCATATATTCCTGGTCCTAGCTCACGTACCGATGCCCT  
TCTCTCTTTCTGCTCTTCATTCATTGCTTCTTCATCTTCGTATTCTATCATCTCTTTATACAAATTAT

+

FFFFFFFFFFFFFFFFFFFFFFFFFFFFFFFFFFFFFFFFFFFFFFFFFFFFFFFFFFFFFFFFFFFFFFFF  
,FFFFFFFFFFFFFFFFFFFFFFFFFFFFFFFFFFFFFFFFFFFFFFFFFFFFFFFFFFFFFFFFFFFFFFFF

@A00155:342:HHGFNDSXY:1:2440:1714:26130 2:N:0:GAACCTAG+TCCGCATA  
GTATTGCCTAACTAGCACGTTAGCATAGTCATATATTCCTGGTCCTAGCTCACGTACCGATGCCCTTC  
TCTCTTTCTGCTCTTCATTCATTGCTTCTTCATCTTCGTATTCTATCATCTCTTTATACAAATTATCT

+

::F,::FF:F:F:FFFF,F,F:FF,F:FF,FF,F,FFF,:F:FFFFFF:FFFF::FF:F,:FFFF:F  
FFFF:FFFFFFFFFFFF:FFF,:F:FFFF,FFFFFFFF:FF:FFFFFFFF,FF:FFFF,:FFFF

@A00155:342:HHGFNDSXY:1:2544:24442:27508 2:N:0:GAACCTAG+TCCGCATA  
CCTAACTAGCACGTTAGCATAGTCATATATTCCTGGTCCTAGCTCACGTACCGATGCCCTTCTCTCT  
TCTGCTCTTCATTCATTGCTTCTTCATCTTCGTATTCTATCATCTCTTTATACAAATTATCTATACAA

+

FFFFFFFFFFFFFFFFFFFFFFFFFFFFFFFFFFFFFFFFFFFFFFFFFFFFFFFFFFFFFFFFFFFFFFFF  
FFFFFFFFFFFF,FFFFFFFFFFFFFFFFFFFFFFFFFFFFFFFFFFFFFFFFFFFFFFFFFFFFFFFFFFFF

@A00155:342:HHGFNDSXY:1:1653:6976:34835 2:N:0:GAACCTAG+TCCGCATA  
CCTAACTAGCACTTTAGCATAGTCATATATTCCTGGTCCTAGCTCACGTACCGATGCCCTTCTCTCT  
TCTGCTCTTCATTCATTGCTTCTTCATCTTCGTATTCTATCATCTCTTTATACAAATTATCTATACAA

+

F,:F,FFFFFF,F:F,FF,FFFFFFFFFFFFFFFF:FFFFFFFFFFFF,FFFFFF:FFFFFFFFFFFF:F  
F,FF:FF:FFFFFF,F::FFFFFFFFFFFF,FFFFFF:FFFFFFFF,FFFFFFFFFFFFFFFF:,FFFF:F

@A00155:342:HHGFNDSXY:1:2242:17318:11694 1:N:0:GAACCTAG+TCCGCATA  
TAGCATAGTCATATATTCCTGGTCCTAGCTCACGTACCGATGCCCTTCTCTCTTTCTGCTCTTCATTC  
ATTGCTTCTTCATCTTCGTATTCTATCATCTCTTTATACAAATTATCTATACAACCATTCCTGTCTGA

+

FFFFFFFFFFFFFFFFFFFFFFFFFFFFFFFFFFFFFFFFFFFFFFFFFFFFFFFFFFFFFFFFFFFFFFFF  
FFFF:FFFFFFFFFFFFFFFFFFFFFFFFFFFFFFFFFFFFFFFFFFFFFFFFFFFFFFFFFFFFFFFFFFFF

@A00155:342:HHGFNDSXY:1:2242:13593:13291 1:N:0:GAACCTAG+TCCGCATA  
TAGCATAGTCATATATTCCTGGTCCTAGCTCACGTACCGATGCCCTTCTCTCTTTCTGCTCTTCATTC  
ATTGCTTCTTCATCTTCGTAGTCTATCATCTCTTTATACAAATTATCTATACAACCATTCCTGTCTGA

+

FFFFFFFFFFFFFFFFFFFFFFFFFFFFFFFFFFFFFFFFFFFFFFFFFFFFFFFFFFFFFFFFFFFFFFFF  
FFFF:FFF:FFFFFFFFFFFF,FFF:,FFFFFFFFFFFF:FFFFFFFFFFFFFFFFFFFFFFFFFFFF

@A00155:342:HHGFNDSXY:1:1220:4010:25880 2:N:0:GAACCTAG+TCCGCATA  
TCCTAGCTCACGTACCGATGCCCTTCTCTCTTTCTGCTCTTCATTCATTGCTTCTTCATCTTCGTATT  
CTATCATCTCTTTATACAAATTATCTATACAACCATTCCTGTCTGATATCGGACCTCCGACTATGACA

+

FFFFFFFFFFFFFFFFFFFFFFFFFFFFFFFFFFFFFFFFFFFFFFFFFFFFFFFFFFFFFFFFFFFFFFFF  
:FFFFFFFF:FFFFFFFFFFFFFFFFFFFFFFFFFFFFFFFFFFFFFFFFFFFFFFFFFFFFFFFFFFFF

@A00155:342:HHGFNDSXY:1:2242:17318:11694 2:N:0:GAACCTAG+TCCGCATA  
TCCTAGCTCACGTACCGATGCCCTTCTCTCTTTCTGCTCTTCATTCATTGCTTCTTCATCTTCGTATT  
CTATCATCTCTTTATACAAATTATCTATACAACCATTCCTGTCTGATATCGGACCTCCGACTATGACA

+

FFFFF:F:FFFFFFFFFFFF:FFFFFFFFFFFFFFFFFFFFFFFFFFFFFFFFFFFFFFFFFFFFFFFF  
FFFFFFFFFFFF:FFF:FFFFFFFFFFFFFFFFFFFFFFFFFFFFFFFFFFFFFFFFFFFFFFFFFFFF



[illegible]



[illegible]

@A00155:342:HHGFNDSXY:1:1473:15167:21966 1:N:0:GAACCTAG+TCCGCATA  
TATCTATAACAACCATTCCTGTCTGATATCGGACCTCCGACTATGACATGGGCAGCAACTAGCTTCCTA  
CATACCTTCTCATCCACACTGAACACATTAGACAATCTCACAACCTGACATGTCCAGCAAGGCTAGTAT  
+  
FFFFFFFFFFFF:FFFFFFFFFFFFFFFFFFFFFFFFFFFFFFFFFFFFFFFFFFFFFFFFFFFFFFFFFFFF:FF  
FFFFFFFFFFFFFFFFFFFFFFFFFFFFFFFFFFFFFFFFFFFFFFFFFFFFFFFFFFFFFFFFFFFFFFFF:FF:F:FF  
@A00155:342:HHGFNDSXY:1:2242:23863:23124 1:N:0:GAACCTAG+TCCGCATA  
TCTATAACAACCATTCCTGTCTGATATCGGACCTCCGACTATGACATGGGCAGCAACTAGCTTCCTACA  
TACCTTCTCATCAACACTGAACACATTAGACAATCTCACAACCTGACATGTCCAGCAAGGCTAGTATC  
+  
FFFFFFFFFFFF,FF,FFF,F::FF,FFFF,F,:F:F:FF:FFF:FFFF,,FF::FF,:FFFF::FF,F  
FFFF:F,FFFF,FFFFFF,F:FFFF:,F,FFFFFFFFFFFF:,FFFF::FFF,,FF,F:F,FF:F  
@A00155:342:HHGFNDSXY:1:2175:2745:35086 1:N:0:GAACCTAG+TCCGCATA  
ATATCGGACCTCCGACTATGACATGGGCAGCAACTAGCTTCCTACATACCTTCTCATCCACACTGAAC  
ACATTAGACAATCTCACAACCTGACATGTCCAGCAAGGCTAGTATCATTTCTTCTGAACCCCTGCACCT  
+  
FFFFFFFFFFFFF:FFFFFFFF:FFFFFFFFFFFFF:F:FFFFFFFFFFFFFFFFFFFF:FFFFFFFFFFFFF  
FFFFFFFFFFFFFFFFFFFFF:FFFFFFFFFFFFF:FFFFFFFFFFFFFFFFFFFFF:FFFF:FFFFFFFFF::FF  
@A00155:342:HHGFNDSXY:1:1344:11803:8750 2:N:0:GAACCTAG+TCCGCATA  
CTCCGACTATGACATGGGCAGCAACTAGCTTCCTACATACCTTCTCATCCACACTGAACACATTAGAC  
AATCTCACAACCTGACATGTCCAGCAAGGCTAGTATCATTTCTTCTGAACCCCTGCACCTAGCACCTAC  
+  
:F:,FF,FFFFFF,FFFFFFFFFFFFFFFFFFFFFFFFFFFFFFFFFFFFFFFFFFFFFFFFFFFFFFFFFFFF  
FFFFFFFFFFFFFFFFFFFFFFFFFFFFFFFFFFFF,FFFFF,FFFFFFFFFFFFFFFFFFFF:FFFFFFFFFFFFF,FFFFFFFFF  
@A00155:342:HHGFNDSXY:1:2571:22480:18912 1:N:0:GAACCTAG+TCCGCATA  
GGGCAGCAACTAGCTTCCTACATACCTTCTCATCCACACTGAACACATTAGACAATCTCACAACCTGAC  
ATGTCCAGCAAGGCTAGTATCATTTCTTCTGAACCCCTGCACCTAGCACCTACTTCCTCACATCTTGC  
+  
FFFFFFFFFFFFFFFFFFFFFFFFFFFFFFFFFFFFFFFFFFFFFFFFFFFFFFFFFFFFFFFFFFFFFFFFFFFF  
FFFFFFFFFFFFFFFFFFFFFFFFFFFFFFFFFFFFFFFFFFFFFFFFFFFFFFFFFFFFFFFFFFFFFFFFFFFF  
@A00155:342:HHGFNDSXY:1:1660:11369:17362 1:N:0:GAACCTAG+TCCGCATA  
GGGCAGCAACTAGCTTCCTACATACCTTCTCATCCACACTGAACACATTAGACAATCTCACAACCTGAC  
ATGTCCAGCAAGGCTAGTATCATTTCTTCTGAACCCCTGCACCTAGCACCTACTTCCTCACATCTTGC  
+  
FFFFFFFFFFFFFFFFFFFFFFFFFFFFFFFFFFFFFFFFFFFFFFFFFFFFFFFFFFFFFFFFFFFFFFFFFFFF  
:FFFFFFFFFFFFFFFFFFFFFFFFFFFFFFFFFFFFFFFFFFFFFFFFFFFFFFFFFFFFFFFFFFFF:F,,FFFFFFFFFFFFF  
@A00155:342:HHGFNDSXY:1:1223:12599:34773 1:N:0:GAACCTAG+TCCGCATA  
CTACATACCTTCTCATCCACACTGAACACATTAGACAATCTCACAACCTGACATGTCCAGCAAGGCTAG  
TATCATTTCTTCTGAACCCCTGCACCTAGCACCTACTTCCTCACATCTTGCCACACACGCTTTCAACG  
+  
FFFFFFFFFFFFFFFFFFFFFFFFFFFFFFFFFFFFFFFFFFFFFFFFFFFFFFFFFFFFFFFFFFFFFFFFFFFF:F  
FFFFFFFFFFFFFFFFFFFFFFFFFFFFFFFFFFFFFFFFFFFFFFFFFFFFFFFFFFFFFFFFFFFF:FFFFFF:FFFFFFF:FFFFFFF  
@A00155:342:HHGFNDSXY:1:2175:2745:35086 2:N:0:GAACCTAG+TCCGCATA  
CATCCACACTGAACACATTAGACAATCTCACAACCTGACATGTCCAGCAAGGCTAGTATCATTTCTTCT  
GAACCCCTGCACCTAGCACCTACTTCCTCACATCTTGCCACACACGCTTTCAACGCCTCTAGCAGCC  
+  
FF:FF:FFF,:FFF,FF,FFFF:FF:FFF,:,:F,:FFF,FF,FFF:F:FFFFFF:FFFFFFFFF:FFFF  
FF::FFFFFF:FF,F:,FF,FF::,:FF:FF,F,F,F::,FFFFFFFFFFFF:FFFF,FFFFFF:FFFFFF  
@A00155:342:HHGFNDSXY:1:1663:2582:9533 2:N:0:GAACCTAG+TCCGCATA  
GAACACATTAGACAATCTCACAACCTGACATGTCCAGCAAGGCTAGTATCATTTCTTCTGAACCCCTGC  
ACCTAGCACCTACTTCCTCACATCTTGCCACACACGCTTTCAACGCCTCTAGCAGCCTGCTAGGTTCC  
+  
FFF,F:FFFFFF:FFFFFFFFFFFFFFFFFFFFFFFFFFFFFFFFFFFF:FFF:FFFFFFFFF:FFF,FF,FFFFFFFF  
FF,FFFFFFFFFFFFFFFFFFFFFFFFFFFFFFFFFFFF,FFFFFFFFFFFFFFFFFFFF,FFFF:FFF:FFFFFFFFF:F

@A00155:342:HHGFNDSXY:1:2121:16179:26819 1:N:0:GAACCTAG+TCCGCATA  
AACACATTAGACAATCTCACAACGACATGTCCAGCAAGGCTAGTATCATTTCTTCTGAACCCCTGCA  
CCTAGCACCTACTTCCTCACATCTTGCCACACACGCTTTCAACGCCTCTAGCAGCCTGCTAGGTTCTCT  
+  
FFFFFFFFFFFFFFF:FFFFFFFFFFFFFFFFFFFFFFFFFFFFFFFFFFFFFFFFFFFFFFFFFFFFFFFFFFFF  
FFFFFFFFFFFFFFFFFFFFFFFFFFFFFFFFFFFFFFFFFFFFFFFFFFFFFFFFFFFFFFFFFFFFFFFFFFFF:  
@A00155:342:HHGFNDSXY:1:2571:22480:18912 2:N:0:GAACCTAG+TCCGCATA  
CACATTAGACAATCTCACAACGACATGTCCAGCAAGGCTAGTATCATTTCTTCTGAACCCCTGCACC  
TAGCACCTACTTCCTCACATCTTGCCACACACGCTTTCAACGCCTCTAGCAGCCTGCTAGGTTCTCTGG  
+  
FFFFFFFFFFFFFFF:FFFFFFFFFFFFFFFFFFFFFFFFFFFFFFFFFFFFFFFFFFFFFFFFFFFFFFFFFFFF  
FFFFFFFFFFFF,FFFFFFFF,FFFFFFFFFFFFFFFFFFFFFFFFFFFFFFFFFFFFFFFFFFFFFFFFFFFFFFF  
@A00155:342:HHGFNDSXY:1:1660:11369:17362 2:N:0:GAACCTAG+TCCGCATA  
CACATTAGACAATCTCACAACGACATGTCCAGCAAGGCTAGTATCATTTCTTCTGAACCCCTGCACC  
TAGCACCTACTTCCTCACATCTTGCCACACACGCTTTCAACGCCTCTAGCAGCCTGCTAGGTTCTCTGG  
+  
FFFFFFFFFFFFF:FFFFFFFFFF:FFFFFFFFFFFFFFFFFFFFFFF:FFFFFFFFF:FFFFFFFFFFFFFFFFFFFFF  
FFFFFFFFFFFF,FFF:FFFFFFFFFFFFFFFFFFFFFFFFFFFFFFFFFFFFFFFFFFFFFFFFFFFFFFFFFFFF  
@A00155:342:HHGFNDSXY:1:1513:21667:6136 1:N:0:GAACCTAG+TCCGCATA  
ATCTCACAACGACATGTCCAGCAAGGCTAGTATCATTTCTTCTGAACCCCTGCACCTAGCACCTACT  
TCCTCACATCTTGCCACACACGCTTTCAACGCCTCTAGCAGCCTGCTAGGTTCTCTGGCTCTCCACCCT  
+  
FFF:FFFFFFFFFFFFFFFFF,FFFFFFF:FF:FFFFFFFFF:FFFFFFFFFFFFFFFFFFFFFFFFFFFFFFFFF  
FFFFFFFFFFFFFFFFFFFFFFFFFFFFFFFFFFFF,FFFFFFFF:FFF,FFFFFFFFF:FFFFFFFFFFFFFFFFF:F:FF  
@A00155:342:HHGFNDSXY:1:2121:16179:26819 2:N:0:GAACCTAG+TCCGCATA  
CACAACGACATGTCCAGCAAGGCTAGTATCATTTCTTCTGAACCCCTGCACCTAGCACCTACTTCCT  
CACATCTTGCCACACACGCTTTCAACGCCTCTAGCAGCCTGCTAGGTTCTCTGGCTCTCCACCCTAGAG  
+  
FFFFF:FFFFFFFFFFFFF:FFFFFFFFFFFFFFFFFFFFFFFFFFFFFFFFFFFFFFFFFFFFFFFFFFFFFFFFF  
FFF:FF:FFFFFFFFFFFFFFFFFFFFF:FFFFFFF:FFFFFFFFFFFFFFFFFFFFFFFFFFFFFFFFFFFF:FFFFFFF  
@A00155:342:HHGFNDSXY:1:1232:1606:7498 2:N:0:GAACCTAG+TCCGCATA  
CTGACATGTCCAGCAAGGCTAGTATCATTTCTTCTGAACCCCTGCACCTAGCACCTACTTCCTCACAT  
CTTGCCACACACGCTTTCAACGCCTCTAGCAGCCTGCTAGGTTCTCTGGCTCTCCACCCTAGAGTGCAC  
+  
FFFF:,F,FFFF:FFF,:FFFFFF,F:FF,FFFFFFFFF:FFFF:FFFFFFFFFFFFFFFFFFFF:FFFFF  
FFFFFFFFFFFFFFFFF,FFFFFFFFF,FFFFFFFFF,FFFFFFFFF:F:FFFFFFFFFFFFF,FFFFFFF  
@A00155:342:HHGFNDSXY:1:1232:1606:7498 1:N:0:GAACCTAG+TCCGCATA  
TGACATGTCCAGCAAGGCTAGTATCATTTCTTCTGAACCACTGCACCTAGCACCTACTTCCTCACATC  
TTGCCACACACGCTTTCAACGCCTCTAGCAGCCTGCTAGGTTCTCTGGCTCTCCACCCTAGAGTGCAC  
+  
FFFFFFFFFFFFFFFFFFFFFFFFFFFFFFFFFFFFFFFFFFFFF::FFF,FFFFFFFFF,FF:FFFFFFFFF:FFFFF  
FFFFFFFFFFFFFFFFFFFFFFFFFFFFFFFFFFFFFFFFFFFFFFFFFFFFFFFFFFFFFFFFFFFFFFFFFFFFF  
@A00155:342:HHGFNDSXY:1:1608:22851:11350 1:N:0:GAACCTAG+TCCGCATA  
TCCAGCAAGGCTAGTATCATTTCTTCTGAACCCCTGCACCTAGCACCTACTTCCTCACATCTTGCCAC  
ACACGCTTTCAACGCCTCTAGCAGCCTGCTAGGTTCTCTGGCTCTCCACCCTAGAGTGCACCTAGTGTG  
+  
FFFFFFFFFFFFFFFFFFFFFFFFFFFFF:FFFFFFFFFFFFFFFFFFFFFFFFFFFFFFFFFFFFFFFFFFFFF:FFF  
FFFF:FFFFFFFFF:FFFFFFFFFFFFFFFFFFFFFFFFFFFFFFFFFFFFFFFFFFFFFFFFFFFFFFFFFFFF:  
@A00155:342:HHGFNDSXY:1:2371:17065:17989 2:N:0:GAACCTAG+TCCGCATA  
CAGCAAGGCTAGTATCATTTCTTCTGAACCCCTGCACCTAGCACCTACTTCCTCACATCTTGTCACAC  
ACGCTTTCAACGCCTCTAGCAGCCTGCTAGGTTCTCTGGCTCTCCACCCTAGAGTGCACCTAGTGTG

[illegible]

[illegible]

@A00155:342:HHGFNDSXY:1:1341:8395:28181 2:N:0:GAACCTAG+TCCGCATA  
ACATCTTGCCACACACGCTTTCAACGCCTCTAGCAGCCTGCTAGGTTCTGGCTCTCCACCCTAGAGT  
GCACTAGTGTGCTACTCCTCTGGTCAAGTATTGTGCACCCAGTCCTTGTTCCTTATCTACTTTGTGC  
+  
:FFFFFFFFFFFFFFFF:F:FFFFFFFFF,:FFFFFFFF,FFFFFFFFFFFFFFFFFFFFFFFF  
FFFFFFFFFFFFFFFF:FFFF:FFFF:FFFFFFFFFFFFFFFFFFFFFFFF:FFFFFFFFFFFF:FF:,FFFF  
@A00155:342:HHGFNDSXY:1:1341:8395:28181 1:N:0:GAACCTAG+TCCGCATA  
CTTGCCACACACGCTTTCAACGCCTCTAGCAGCCTGCTAGGTTCTGGCTCTCCACCCTAGAGTGCAC  
TAGTGTGCTACTCCTCTGGTCAAGTATTGTGCACCCAGTCCTTGTTCCTTATCTACTTTGTGCTCGA  
+  
FFFFFFFFFFFFFFFFFFFFFFFF:FFFFFFFFFFFFFFFFFFFFFFFFFFFFFFFFFFFFFFFF  
FFFFF:FFFFFFFFFFFFFFFFFFFFFFFF:FFFFFFFFFFFFFFFFFFFFFFFF:FFFFFFFFFFFF  
@A00155:342:HHGFNDSXY:1:1205:19633:20995 1:N:0:GAACCTAG+TCCGCATA  
ACACGCTTTCAACGCCTCTAGCAGCCTGCTAGGTTCTGGCTCTCCACCCTAGAGTGCCTAGTGTGCT  
CTACTCCTCTGGTCAAGTATTGTGCACCCAGTCCTTGTTCCTTATCTACTTTGTGCTCGACTCTCAG  
+  
FFFFFFFFFFFFFFFFFFFFFFFFFFFFFFFFFFFFFFFFFFFFFFFFFFFFFFFFFFFFFFFF  
FFFFFFFFFFFFFFFF:F:FFFF:FFFFFFFFFFFFFFFFFFFFFFFF:FFFFFFFFFFFF  
@A00155:342:HHGFNDSXY:1:2508:8133:18897 2:N:0:GAACCTAG+TCCGCATA  
TACGCCTCTAGCAGCCTGCTAGGTTCTGGCTCTCCACCCTAGAGTGCCTAGTGTGCTACTCCTCT  
GGTCAAGTATTGTGCACCCAGTCCTTGTTCCTTATCTACTTTGTGCTCGACTCTCAGAAAC  
+  
FFFFFFFFFFFFFFFFFFFFFFFFFFFFFFFF:F:FFFFFFFF:FFFFFFFFFFFFFFFF:FFFF  
FFFFFFFFFFFFFFFFFFFFFFFF:F:FFFF:FFFFFFFFFFFFFFFFFFFFFFFF  
@A00155:342:HHGFNDSXY:1:2508:7129:18818 2:N:0:GAACCTAG+TCCGCATA  
TACGCCTCTAGCAGCCTGCTAGGTTCTGGCTCTCCACCCTAGAGTGCCTAGTGTGCTACTCCTCT  
GGTCAAGTATTGTGCACCCAGTCCTTGTTCCTTATCTACTTTGTGCTCGACTCTCAGAAAC  
+  
FFFFFFFFF,FFFFFFFFFFFFF:FFFFFFFF:FFFFFFFFFFFFFFFF,FFFFFFFFFFFFFFFF  
FFFFFFFFFFFFFFFFFFFFFFFFFFFFFFFF,FFFFFFFFF:FFFFFFFF:FFFFFFFFFFFF  
@A00155:342:HHGFNDSXY:1:2624:30879:24565 1:N:0:GAACCTAG+TCCGCATA  
AACGCCTCTAGCAGCCTGCTAGGTTCTGGCTCTCCACCCTAGAGTGCCTAGTGTGCTACTCCTCT  
GGTCAAGTATTGTGCACCCAGTCCTTGTTCCTTATCTACTTTGTGCTCGACTCTCAGAACTCACCTA  
+  
FFFFFFFFFFFFFFFFFFFFFFFFFFFFFFFFFFFFFFFFFFFFFFFFFFFFFFFFFFFFFFFF  
FFFFFFFFFFFFFFFFFFFFFFFFFFFFFFFF:F:FFFFFFFFFFFFFFFFFFFFFFFFFFFFFFFF  
@A00155:342:HHGFNDSXY:1:1624:32235:19022 1:N:0:GAACCTAG+TCCGCATA  
AACGCCTCTAGCAGCCTGCTAGGTTCTGGCTCTCCACCCTAGAGTGCCTAGTGTGCTACTCCTCT  
GGTCAAGTATTGTGCACCCAGTCCTTGTTCCTTATCTACTTTGTGCTCGACTCTCAGAACTCACCTA  
+  
FFFFFFFFFFFFFFFFFFFFFFFFFFFFFFFFFFFFFFFFFFFFFFFFFFFFFFFFFFFFFFFF  
FFFFFFF:FFFFFFFFFFFFFFFFFFFFFFFFFFFFFFFFFFFFFFFFFFFFFFFFFFFFFFFFF:  
@A00155:342:HHGFNDSXY:1:1322:24777:19413 1:N:0:GAACCTAG+TCCGCATA  
AACGCCTCTAGCAGCCTGCTAGGTTCTGGCTCTCCACCCTAGAGTGCCTAGTGTGCTACTCCTCT  
GGTCAAGTATTGTGCACCCAGTCCTTGTTCCTTATCTACTTTGTGCTCGACTCTCAGAACTCACCTA  
+  
FFFFFFFFF:FFFFFFFFFFFFFFFFFFFFFFFFFFFFFFFF:F:FFFFFFFFFFFFFFFFFFFFFFFF  
FFFFFFF,FFFFFFFFFFFFFFFFFFFFFFFF:FFFFFFFFFFFFFFFFFFFFFFFFFFFFFFFF  
@A00155:342:HHGFNDSXY:1:2454:10836:35822 2:N:0:GAACCTAG+TCCGCATA  
TCTAGCAGCCTGCTAGGTTCTGGCTCTCCACCCTAGAGTGCCTAGTGTGCTACTCCTCTGGTCAA  
GTATTGTGCACCCAGTCCTTGTTCCTTATCTACTTTGTGCTCGACTCTCAGAACTCACCTACTGAGA  
+  
FFF:FFFFFF:FFFFFF,FFFFFFFFFFFFF:FF:FF,:FFFF:FFFFFF,FFFFFFFFFFFF:FF,  
FF:FFFF:F:FFF:FFFFFFFFF:FFF,F:FFFFFFFF:FFFF:FF:FFFFFFFF:FF:FFFFFFF



@A00155:342:HHGFNDSXY:1:2523:7970:28823 2:N:0:GAACCTAG+TCCGCATA  
AGCCTGCTAGGTTCTGGCTCTCCACCCTAGAGTGCCTAGTGTGCTACTCCTCTGGTCAAGTATTG  
TGCACCCAGTCCTTGTTCTTATCTACTTTGTGCTCGACTCTCAGAACTCACCTACTGAGAACACGT  
+  
FFFFFFFFFFFFFFFFFFFFFFFFFFFFFFFFFFFFFFFFFFFFFFFFFFFFFFFFFFFFFFFFFFFFFFFF  
FFFFFFFFFFFFFFFF:FFFFFFFFFFFFFFFFFFFFFFFFFFFFFFFFFFFFFFFFFFFFFFFFFFFFFFFF  
@A00155:342:HHGFNDSXY:1:1651:12491:33959 2:N:0:GAACCTAG+TCCGCATA  
GCCTGCTAGGTTCTGGCTCTCCACCCTAGAGTGCCTAGTGTGCTACTCCTCTGGTCAAGTATTG  
GCACCCAGTCCTTGTTCTTATCTACTTTGTGCTCGACTCTCAGAACTCACCTACTGAGAACACGT  
+  
FFFFFFFFFFFFFFFFFFFFFFFFFFFFFFFFFFFFFFFFFFFFFFFFFFFFFFFFFFFFFFFFFFFFFFFF  
FFFFFFFFFFFFFFFF:FFFFFFFFFFFFFFFFFFFFFFFFFFFFFFFFFFFFFFFFFFFFFFFFFFFFFFFF  
@A00155:342:HHGFNDSXY:1:2508:8133:18897 1:N:0:GAACCTAG+TCCGCATA  
CTGCTAGGTTCTGGCTCTCCACCCTAGAGTGCCTAGTGTGCTACTCCTCTGGTCAAGTATTGTG  
ACCCAGTCCTTGTTCTTATCTACTTTGTGCTCGACTCTCAGAACTCACCTACTGAGAAC  
+  
FFFFFFFFFFFFFFFFFFFFFFFFFFFFFFFFFFFFFFFFFFFFFFFFFFFFFFFFFFFFFFFFFFFFFFFF  
FFFF:FFFFFFFFFFFFFFFFFFFFFFFFFFFFFFFFFFFFFFFFFFFFFFFFFFFFFFFF:FFFF, :FFFFFFFF  
@A00155:342:HHGFNDSXY:1:2508:7129:18818 1:N:0:GAACCTAG+TCCGCATA  
CTGCTAGGTTCTGGCTCTCCACCCTAGAGTGCCTAGTGTGCTACTCCTCTGGTCAAGTATTGTG  
ACCCAGTCCTTGTTCTTATCTACTTTGTGCTCGACTCTCAGAACTCACCTACTGAGAAC  
+  
FFFFFFFFFFFFFFFFFFFFFFFFFFFFFFFFFFFFFFFFFFFFFFFFFFFFFFFFFFFFFFFFFFFFFFFF  
FFFFFFFFFFFFFFFF:FFFFFFFFFFFFFFFFFFFFFFFFFFFFFFFFFFFFFFFFFFFFFFFFFFFFFFFF  
@A00155:342:HHGFNDSXY:1:1651:27109:3129 1:N:0:GAACCTAG+TCCGCATA  
TTCCTGGCTCTCCACCCTAGAGTGCCTAGTGTGCTACTCCTCTGGTCAAGTATTGTGCACCCAGTC  
CTTGTTCTTATCTACTTTGTGCTCGACTCTCAGAACTCACCTACTGAGAACACGTTACACTAGTG  
+  
FFFFFFFFFFFFFFFFFFFFFFFFFFFFFFFFFFFFFFFFFFFFFFFFFFFFFFFFFFFFFFFFFFFFFFFF  
FFFF:FFFFFFFFFFFF:FFFFFFFFFFFFFFFFFFFF:FFFFFFFF:FFFFFFFFFFFFFFFFFFFFFFFF  
@A00155:342:HHGFNDSXY:1:2507:15483:27023 2:N:0:GAACCTAG+TCCGCATA  
CCTGGCTCTCCACCCTAGAGTGCCTAGTGTGCTACTCCTCTGGTCAAGTATTGTGCACCCAGTCCT  
TGTTCTTATCTACTTTGTGCTCGACTCTCAGAACTCACCTACTGAGAACACGTTACAC  
+  
FFFFFFFFFFFFFFFFFFFFFFFFFFFFFFFFFFFFFFFFFFFFFFFFFFFFFFFFFFFFFFFFFFFFFFFF  
FF:FFFFFFFFFFFF:FFF:FFFFFFFF:FFFFFFFFFFFFFFFFFFFFFFFFFFFFFFFFFFFFFFFF,FFFF  
@A00155:342:HHGFNDSXY:1:1527:17372:14074 2:N:0:GAACCTAG+TCCGCATA  
CCTGGCTCTCCACCCTAGAGTGCCTAGTGTGCTACTCCTCTGGTCAAGTATTGTGCACCCAGTCCT  
TGTTCTTATCTACTTTGTGCTCGACTCTCAGAACTCACCTACTGAGAACACGTTACAC  
+  
FFFFFFFFFFFFFFFFFFFFFFFFFFFFFFFFFFFFFFFFFFFFFFFFFFFFFFFFFFFFFFFFFFFFFFFF  
:F,FFFF:FFFFFFFFFFFFFFFFFFFFFFFFFFFFFFFFFFFFFFFFFFFFFFFF:FFFFFFFFFFFFFFFF  
@A00155:342:HHGFNDSXY:1:1527:17083:14888 2:N:0:GAACCTAG+TCCGCATA  
CCTGGCTCTCCACCCTAGAGTGCCTAGTGTGCTACTCCTCTGGTCAAGTATTGTGCACCCAGTCCT  
TGTTCTTATCTACTTTGTGCTCGACTCTCAGAACTCACCTACTGAGAACACGTTACAC  
+  
FFFFFFFF:FFFFFFFF:FFFFFFFF,FFFFFFFFFFFFFFFFFFFFFFFFFFFFFFFFFFFFFFFFFFFF  
FF,FFFFFFFFFFFF:FFFFFFFFFFFFFFFFFFFF:FF:FFFF,FF:FFFFFFFFFFFFFFFF  
@A00155:342:HHGFNDSXY:1:1527:18204:23437 2:N:0:GAACCTAG+TCCGCATA  
CCTGGCTCTCCACCCTAGAGTGCCTAGTGTGCTACTCCTCTGGTCAAGTATTGTGCACCCAGTCCT  
TGTTCTTATCTACTTTGTGCTCGACTCTCAGAACTCACCTACTGAGAACACGTTACAC  
+  
FFFFFFFFFFFFFFFFFFFFFFFFFFFFFFFFFFFFFFFFFFFFFFFFFFFFFFFFFFFFFFFFFFFFFFFF  
FFFFFFFFFFFF:FFF:FFFFFFFFFFFFFFFFFFFFFFFFFFFFFFFFFFFFFFFFFFFFFFFFFFFF

@A00155:342:HHGFNDSXY:1:1549:26341:20807 2:N:0:GAACCTAG+TCCGCATA  
GCCCTAGAGTGCAGTAGTGTGCTACTCCTCTGGTCAAGTATTGTGCACCCAGTCCTTGTTCTTATC  
TACTTTGTGCTCGACTCTCAGAACTCACCTACTGAGAACACGTTACACTTAGTGTGCTGCGCCCTAG  
+  
FFFFFFFFFFFFFFFF:FFFFFFFFFFFFFFFF:FFFFFFFFFFFFFFFF:FFFFFFFFFFFFFFFF  
,FF:FFFFFFFFFFFFFFFF:FFFFFFFF:FFFFFFFFFFFFFFFFFFFFFFFF  
@A00155:342:HHGFNDSXY:1:1651:27109:3129 2:N:0:GAACCTAG+TCCGCATA  
CCCTAGAGTGCAGTAGTGTGCTACTCCTCTGGTCAAGTATTGTGCACCCAGTCCTTGTTCTTATCT  
ACTTTGTGCTCGACTCTCAGAACTCACCTACTGAGAACACGTTACACTTAGTGTGCTGCGCCCTAGC  
+  
FFFFFFFFFFFFFFFFFFFFFFFFFFFFFFFFFFFFFFFFFFFFFFFFFFFFFFFF:FFFFFFFF  
FFFFFFFFFFFFFFFFFFFFFFFFFFFFFFFFFFFFFFFF:FFFFFFFF:FFFFFF:FFFFFFFFFFFFFFFF  
@A00155:342:HHGFNDSXY:1:2602:27651:32503 1:N:0:GAACCTAG+TCCGCATA  
CCCTAGAGTGCAGTAGTGTGCTACTCCTCTGGTCAAGTATTGTGCACCCAGTCCTTGTTCTTATCT  
ACTTTGTGCTCGACTCTCAGAACTCACCTACTGAGAACACGTTACACTTAGTGTGCTGCGCCCTAGC  
+  
FFFFFFFFFFFFFFFFFFFFFFFFFFFFFFFFFFFFFFFFFFFFFFFFFFFFFFFF:FFFFFFF  
FFFFFFFFFFFFFFFFFFFFFFFF,FFFF:FFFFFFFFFFFFFFFFFFFFFFFFFFFFFFFF:,,FFF  
@A00155:342:HHGFNDSXY:1:1527:17083:14888 1:N:0:GAACCTAG+TCCGCATA  
TAGAGTGCAGTAGTGTGCTACTCCTCTGGTCAAGTATTGTGCACCCAGTCCTTGTTCTTATCTACT  
TTGTGCTCGACTCTCAGAACTCACCTACTGAGAACACGTTACACTTAGTGTGCTGCGCC  
+  
FFFFFFFFFFFFFFFFFFFFFFFFFFFFFFFFFFFFFFFF:FFFFFFFFFFFFFFFFFFFFFFFFFFFFFFFF  
FFFFFFFFFFFFFFFFFFFFFFFFFFFFFFFFFFFFFFFFFFFFFFFFFFFFFFFFFFFFFFFF  
@A00155:342:HHGFNDSXY:1:1527:17372:14074 1:N:0:GAACCTAG+TCCGCATA  
TAGAGTGCAGTAGTGTGCTACTCCTCTGGTCAAGTATTGTGCACCCAGTCCTTGTTCTTATCTACT  
TTGTGCTCGACTCTCAGAACTCACCTACTGAGAACACGTTACACTTAGTGTGCTGCGCC  
+  
FFFFFFFFFFFFFFFFFFFFFFFFFFFFFFFFFFFFFFFF,FFFFFFFFFFFFFFFFFFFFFFFFFFFFFFFF  
FFFFFFFF:FFFFFFFFFFFFFFFF:FFFFFF:FFFFFFFFFFFF,FFFFFFFFFFFF  
@A00155:342:HHGFNDSXY:1:1527:18204:23437 1:N:0:GAACCTAG+TCCGCATA  
TAGAGTGCAGTAGTGTGCTACTCCTCTGGTCAAGTATTGTGCACCCAGTCCTTGTTCTTATCTACT  
TTGTGCTCGACTCTCAGAACTCACCTACTGAGAACACGTTACACTTAGTGTGCTGCGCC  
+  
FFFFFFFFFFFFFFFFFFFFFFFFFFFFFFFFFFFFFFFF:,FFFFFFFFFFFFFFFF:FF:FFFFFFFFF::  
FFFFFFFFFFFFFFFFFFFFFFFF:FFFFFFFFFFFFFFFF:FFFFFFFFFFFF  
@A00155:342:HHGFNDSXY:1:2507:15483:27023 1:N:0:GAACCTAG+TCCGCATA  
TAGAGTGCAGTAGTGTGCTACTCCTCTGGTCAAGTATTGTGCACCCAGTCCTTGTTCTTATCTACT  
TTGTGCTCGACTCTCAGAACTCACCTACTGAGAACACGTTACACTTAGTGTGCTGCGCC  
+  
FFFFFFFFFFFFFFFFFFFFFFFF:FFFFFF,FFFFFFFFFFFFFFFF:FFFF:FFFF,FFFFFFFF  
,FFFF:FFFFFFFFFFFFFFFFFFFFFFFFFFFFFFFFFFFFFFFFFFFFFFFFFFFFFFFF  
@A00155:342:HHGFNDSXY:1:2230:30002:34851 1:N:0:GAACCTAG+TCCGCATA  
AGAGTGCAGTAGTGTGCTACTCCTCTGGTCAAGTATTGTGCACCCAGTCCTTGTTCTTATCTACTT  
TGTGCTCGACTCTCAGAACTCACCTACTGAGAACACGTTACACTTAGTGTGCTGCGCCCTAGCGTGT  
+  
FFFFFFFFFFFFFFFFFFFFFFFFFFFFFFFFFFFFFFFF,FFFFFFFFFFFF:FFFF:FFFFFFFFFFFFFFFF  
FFFFFFFFFFFFFFFFFFFFFFFFFFFFFFFFFFFFFFFF:FFFFFFFFFFFFFFFF:FFFF,F  
@A00155:342:HHGFNDSXY:1:2351:29062:24956 1:N:0:GAACCTAG+TCCGCATA  
GAGTGCAGTAGTGTGCTACTCCTCTGGTCAAGTATTGTGCACCCAGTCCTTGTTCTTATCTACTTT  
GTGCTCGACTCTCAGAACTCACCTACTGAGAACACGTTACACTTAGTGTGCTGCGCCCTAGCGTT  
+  
FFF:FFFFFFFFFFFFFFFFFFFFFFFFFFFFFFFFFFFFFFFFFFFFFFFFFFFFFFFF,F  
FFFFFFFFFFFFFFFF:FFFFFFFFFFFFFFFFFFFFFFFFFFFFFFFF:FF:FFFF,F

[illegible]

@A00155:342:HHGFNDSXY:1:2130:3016:7435 1:N:0:GAACCTAG+TCCGCATA  
GTCAAGTATTGTGCACCCAGTCCTTGTTTCCTTATCTACTTTGTGCTCGACTCTCAGAACTCACCTAC  
TGAGAACACGTTACACTTAGTGTGCTGCGCCCTAGCGTTTATCATTCTCATTTTTTCGTGTATAACGT  
+  
FFFFFFFFFFFFFFFFFFFFFFFFFFFFFFFFFFFFFFFFFFFFFFFFFFFFFFFFFFFFFFFFFFFFFFFF  
FFFFFFFFFFFFFFFFFFFFFFFFFFFFFFFFFFFFFFFFFFFFFFFFFFFFFFFFFFFFFFFFFFFFFFFF  
@A00155:342:HHGFNDSXY:1:2331:22905:7811 1:N:0:GAACCTAG+TCCGCATA  
GTCAAGTATTGTGCACCCAGTCCTTGTTTCCTTATCTACTTTGTGCTCGACTCTCAGAACTCACCTAC  
TGAGAACACGTTACACTTAGTGTGCTGCGCCCTAGCGTTTATCATTCTCATTTTTTCGTGTATAACGT  
+  
FFF:FFF:FFFFFFFFFFFFFFFFFFFFFFFFFFFFFFFFFFFFFFFFFFFFFFFFFFFFFFFFFFFFFFFF  
FFFFFFFFFFFFFFFFFFFFFFFFFFFFFFFFFFFFFFFFFFFFFFFFFFFFFFFFFFFFFFFFFFFFFFFF  
@A00155:342:HHGFNDSXY:1:2477:22399:22592 1:N:0:GAACCTAG+TCCGCATA  
CAAGTATTGTGCACCCAGTCCTTGTTTCCTTATCTACTTTGTGCTCGACTCTCAGAACTCACCTACTG  
AGAACACGTTACACTTAGTGTGCTGCGCCCTAGCGTTTATCATTCTCATTTTTTCGTGTATAAC  
+  
FFFFFFFFFFFFFFFFFFFFFFFFFFFFFFFFFFFFFFFFFFFFFFFFFFFFFFFFFFFFFFFFFFFFFFFF  
FFFFFFFFFFFFFFFFFFFFFFFFFFFFFFFFFFFFFFFFFFFFFFFFFFFFFFFFFFFFFFFFFFFFFFFF  
@A00155:342:HHGFNDSXY:1:2266:23556:7623 2:N:0:GAACCTAG+TCCGCATA  
CAAGTATTGTGCACCCAGTCCTTGTTTCCTTATCTACTTTGTGCTCGACTCTCAGAACTCACCTACTG  
ATAACACGTTACACTTAGTGTGCTGCGCCCTAGCGTTTATCATTCTCATTTTTTCGTGTATAACGTTC  
+  
FFFFFFFFFFFFFFFFFFFFFFFFFFFFFFFFFFFFFFFFFFFFFFFFFFFFFFFFFFFFFFFFFFFFFFFF  
FFFFFFFFFFFFFFFFFFFFFFFFFFFFFFFFFFFFFFFFFFFFFFFFFFFFFFFFFFFFFFFFFFFFFFFF  
@A00155:342:HHGFNDSXY:1:2566:31458:16986 2:N:0:GAACCTAG+TCCGCATA  
CAAGTATTGTGCACCCAGTCCTTGTTTCCTTATCTACTTTGTGCTCGACTCTCAGAACTCACCTACTG  
ATAACACGTTACACTTAGTGTGCTGCGCCCTAGCGTTTATCATTCTCATTTTTTCGTGTATAACGTTC  
+  
FFFFFFFFFFFFFFFFFFFFFFFFFFFFFFFFFFFFFFFFFFFFFFFFFFFFFFFFFFFFFFFFFFFFFFFF  
FFFFFFFFFFFFFFFFFFFFFFFFFFFFFFFFFFFFFFFFFFFFFFFFFFFFFFFFFFFFFFFFFFFFFFFF  
@A00155:342:HHGFNDSXY:1:2477:22399:22592 2:N:0:GAACCTAG+TCCGCATA  
GTATTGTGCACCCAGTCCTTGTTTCCTTATCTACTTTGTGCTCGACTCTCAGAACTCACCTACTGAGA  
ACACGTTACACTTAGTGTGCTGCGCCCTAGCGTTTATCATTCTCATTTTTTCGTGTATAACGTTTCGCT  
+  
FFFFFFFFFFFFFFFFFFFFFFFFFFFFFFFFFFFFFFFFFFFFFFFFFFFFFFFFFFFFFFFFFFFFFFFF  
FFF:FFFFFFFFFFFFFFFFFFFFFFFFFFFFFFFFFFFFFFFFFFFFFFFFFFFFFFFFFFFFFFFFFFFF  
@A00155:342:HHGFNDSXY:1:2407:23520:13667 1:N:0:GAACCTAG+TCCGCATA  
ATTGTGCACCCAGTCCTTGTTTCCTTATCTACTTTGTGCTCGACTCTCAGAACTCACCTACTGAGAAC  
ACGTTACACTTAGTGTGCTGCGCCCTAGCGTTTATCATTCTCATTTTTTCGTGTATAACGTTTCGCTGT  
+  
FFFFFFFFFFFFFFFFFFFFFFFFFFFFFFFFFFFFFFFFFFFFFFFFFFFFFFFFFFFFFFFFFFFFFFFF  
FFFFFFFFFFFFFFFFFFFFFFFFFFFFFFFFFFFFFFFFFFFFFFFFFFFFFFFFFFFFFFFFFFFFFFFF  
@A00155:342:HHGFNDSXY:1:1663:2582:9533 1:N:0:GAACCTAG+TCCGCATA  
TTGTGCACCCAGTCCTTGTTTCCTTATCTACTTTGTGCTCGACTCTCAGAACTCACCTACTGAGAAC  
CGTTACACTTAGTGTGCTGAGCCCTAGCGTTTATCATTCTCATTTTTTCGTGTATAACGTTTCGCTGTC  
+  
FFFFFFFFF::FFFFFFFF,FFFFFFFFFFFFFFFFFFFFFFFFFFFFFFFFFFFFFFFFFFFFFFFFFFFF  
FFFFFFFFFFFFFFFFFFFFFFFFFFFFFFFFFFFFFFFFFFFFFFFFFFFFFFFFFFFFFFFFFFFFFFFF  
@A00155:342:HHGFNDSXY:1:2439:19452:25880 1:N:0:GAACCTAG+TCCGCATA  
GTGCACCCAGTCCTTGTTTCCTTATCTACTTTGTGCTCGACTCTCAGAACTCACCTACTGAGAACAG  
TTACACTTAGTGTGCTGCGCCATAGCGTTTATCATTCTCATTTTTTCGTGTATAACGTTTCGCTGTC  
+  
FF:,FFF,F,:,,FF:,,:F:F:FF,,FF,,,,,,:,,:F,FFFF,FFFFFFFF:FFFF:FF:F::FF:F::  
:,F,F:F,FF,,,,,F,F:,,,,,FF:,,,FFF:F:F:F,F,:F,,FFFFFFFFF,:FFFF:,,FF

[illegible]

@A00155:342:HHGFNDSXY:1:2331:22905:7811 2:N:0:GAACCTAG+TCCGCATA  
TGTTTCCTTATCTACTTTGTGCTCGACTCTCAGAACTCACCTACTGAGAACACGTTACACTTAGTGTG  
CTGCGCCCTAGCGTTTATCATTCTCATTTTTTTCGTGTATAACGTTTCGCTGTCCTAATATTGTCTATGG  
+  
FF,FFF::F:FFFFFFFFF::FFFFFFFFFFFFFFFFFFFFFFFFFFFFFFFFFFFFF:FFFFFFFFFFFFFFFFFFFF  
FFFFFFFFFFFFFFFFFFFF:FFFFFFFFFFFFFFFFFFFFFFFFFFFFFFFFFFFFFFFFFFFFFFFFFFFFFFFFFFFF  
@A00155:342:HHGFNDSXY:1:2605:22137:31594 2:N:0:GAACCTAG+TCCGCATA  
TCCTTATCTACTTTGTGCTCGACTCTCAGAACTCACCTACTGAGAACACGTTACACTTAGTGTGCTG  
CGCCCTAGCGTTTATCATTCTCATTTTTTTCGTGTATAACGTTTCGCTGTCCTAATATTGTCTATGGAT  
+  
FFFFFFFFFFFFFFFFFFFFFFFFFFFFFFFFFFFFFFFFFFFFFFFFFFFFFFFFFFFFFFFFFFFFFFFFFFFFF  
FFFFFFFFFFFFFFFFFFFFFFFFFFFFFFFFFFFFFFFFFFFFFFFFFFFFFFFFFFFFFFFFFFFFFFFFFFFFF:  
@A00155:342:HHGFNDSXY:1:2230:30002:34851 2:N:0:GAACCTAG+TCCGCATA  
TCCTTATCTACTTTGTGCTCGACTCTCAGAACTCACCTACTGAGAACACGTTACACTTAGTGTGCTG  
CGCCCTAGCGTTTATCATTCTCATTTTTTTCGTGTATAACGTTTCGCTGTCCTAATATTGTCTATGGAT  
+  
FFFFFFFFFF,FF,FFFFFFFFFFFFFFFFFFFFFFFFFFFFFFF:,FFFFFFFFFFFFFFFFFF,FFFFFF:FFFF:FF  
FFFF:FFFFFFFFFFFFFFFFFFFFFFFFFFFFFFFFFFFFFFFFFFFFFFFFFFFFFFFFFFFFFFFFFFFFF:  
@A00155:342:HHGFNDSXY:1:2567:27263:19586 2:N:0:GAACCTAG+TCCGCATA  
TCCTTATCTACTTTGTGCTCGACTCTCAGAACTCACCTACTGAGAACACGTTACACTTAGTGTGCTG  
CGCCCTAGCGTTTATCATTCTCATTTTTTTCGTGTATAACGTTTCGCTGTCCTAATATTGTCTATGGATA  
+  
FFFFFFFFFFFFFFFFFFFFFFFFFFFFFFFFFFFFFFFFFFFFFFFFFFFFFFFFFFFFFFFFFFFFFFFFFFFFF  
FFFFFFFFFFFFFFFFFFFFFFFFFFFFFFFFFFFFFFFFFFFFFFFFFFFFFFFFFFFFFFFFFFFFFFFFFFFFF,  
@A00155:342:HHGFNDSXY:1:1559:23068:8719 1:N:0:GAACCTAG+TCCGCATA  
TCCTTATCTACTTTGTGCTCGACTCTCAGAACTCACCTACTGAGAACACGTTACACTTAGTGTGCTG  
CGCCCTAGCGTTTATCATTCTCATTTTTTTCGTGTATAACGTTTCGCTGTCCTAATATTGTCTATGGATA  
+  
FFFFFFFFFFFFFFFFFFFFFFFFFFFFFFFFFFFFFFFFFFFFFFFFFFFFFFFFFFFFFFFFFFFFFFFFFFFFF  
FFFFFFFFFFFFFFFFFFFFFFFFFFFFFFFFFFFFFFFFFFFFFFFFFFFFFFFFFFFFFFFFFFFFFFFFFFFFF:F  
@A00155:342:HHGFNDSXY:1:1559:23068:8719 2:N:0:GAACCTAG+TCCGCATA  
TCCTTATCTACTTTGTGCTCGACTCTCAGAACTCACCTACTGAGAACACGTTACACTTAGTGTGCTG  
CGCCCTAGCGTTTATCATTCTCATTTTTTTCGTGTATAACGTTTCGCTGTCCTAATATTGTCTATGGATA  
+  
FFFFFFFFF:FFFFFFFFFFFFFFFFFFFFFFFFFFFFFFFFFFFFFFFFFFFFFFFFFFFFFFFFFFFFFFFFFFFF  
FFFFFFFFFFFFFFFFFFFFFFFFFFFFFFFFFFFFFFFFFFFFFFFFFFFFFFFFFFFFFFFFFFFFFFFFFFFFF:  
@A00155:342:HHGFNDSXY:1:2266:23556:7623 1:N:0:GAACCTAG+TCCGCATA  
TCCTTATCTACTTTGTGCTCGACTCTCAGAACTCACCTACTGATAACACGTTACACTTAGTGTGCTG  
CGCCCTAGCGTTTATCATTCTCATTTTTTTCGTGTATAACGTTTCGCTGTCCTAATATTGTCTATGGATA  
+  
FFFFFFFFFFFFFFFFFFFFFFFFFFFFFFFFFFFFFFFFFFFFFFFFFFFFFFFFFFFFFFFFFFFFFFFFFFFFF:  
FFFFF:FFFFFFFFFFFFFFFFFFFFFFFFFFFFFFFFFFFFFFFFFFFFFFFFFFFFFFFFFFFFFFFFFFFFF:  
@A00155:342:HHGFNDSXY:1:2566:31458:16986 1:N:0:GAACCTAG+TCCGCATA  
TCCTTATCTACTTTGTGCTCGACTCTCAGAACTCACCTACTGATAACACGTTACACTTAGTGTGCTG  
CGCCCTAGCGTTTATCATTCTCATTTTTTTCGTGTATAACGTTTCGCTGTCCTAATATTGTCTATGGATA  
+  
FFFFFFFFF:FFFFFFFFFFFFFFFFFFFFFFFFFFFFFFFFFFFFFFFFFFFFFFFFFFFFFFFFFFFFFFFFFFFF  
FFFFFFFFFFFFFFFFFFFFFFFFFFFFFFFFFFFFFFFFFFFFFFFFFFFFFFFFFFFFFFFFFFFFFFFFFFFFF:  
@A00155:342:HHGFNDSXY:1:2518:1633:21699 1:N:0:GAACCTAG+TCCGCATA  
CCTTATCTACTTTGTGCTCGACTCTCAGAACTCACCTACTGAGAACACGTTACACTTAGTGTGCTGC  
GCCCTAGCGTTTATCATTCTCATTTTTTTCGTGTATAACGTTTCGCTGTCCTAATATTGTCTATGGATAC  
+  
FFFFFFFFFFFFFFFFFFFFFFFFFFFFFFFFFFFFFFFFFFFFFFFFFFFFFFFFFFFFFFFFFFFFFFFFFFFFF:  
FFFFFFFFFFFFFFFFFFFFFFFFFFFFFFFFFFFFFFFFFFFFFFFFFFFFFFFFFFFFFFFFFFFFFFFFFFFFF:  
@A00155:342:HHGFNDSXY:1:2518:1633:21699 1:N:0:GAACCTAG+TCCGCATA

@A00155:342:HHGFNDSXY:1:2410:26720:26694 1:N:0:GAACCTAG+TCCGCATA  
CCTTATCTACTTTGTGCTCGACTCTCAGAACTCACCTACTGAGAACACGTTACACTTAGTGTGCTGC  
GCCCTAGCGTTTATCATTCTCATTTTTTCGTGTATAACGTTGCTGTCTTAATATTGTCTATGGATAC  
+  
FF:FFFFFF,FFFFFFFFFFFFFFFFFFFFFFFFFFFFFFFFFFFFFFFFFFFFFFFFFFFFF:FFFFFFFFF  
FFFFFFFFFFFFFFFFFFFFFFFFFFFFFFFFFFFFFFFFFFFFFFFFFFFFFFFFFFFFFFFFF:FFFFFFFFFFFF  
@A00155:342:HHGFNDSXY:1:1442:6189:26522 1:N:0:GAACCTAG+TCCGCATA  
CTTATCTACTTTATGCTCGACTCTCAGAACTCACCTACTGAGAACACGTTACACTTAGTGTGCTGCG  
CCCTAGCGTTTATCATTCTCATTTTTTCGTGTATAACGTTGCTGTCTTAATATTGTCTATGGATACC  
+  
FFFFFFFFFFFFFFFFFFFFFFFFFFFFFFFFFFFFFFFFFFFFFFFFFFFFFFFFFFFFFFFFF  
FFFFF:FFF:FFFFF:FFFFFFFFFFFFF:FFFFFFFFFFFFFFFFFFFFF:FFFFFFFFFFFFF:FFFFF  
@A00155:342:HHGFNDSXY:1:1473:15167:21966 2:N:0:GAACCTAG+TCCGCATA  
TTATCTACTTTGTGCTCGACTCTCAGAACTCACCTACTGAGAACACGTTACACTTAGTGTGCTGCGC  
CCTAGCGTTTATCATTCTCATTTTTTCGTGTATAACGTTGCTGTCTTAATATTGTCTATGGATACC  
+  
FFFFFFFF:FFFFFFFFFFFF:F,F:FFF:FFFFF::FFFFFFFFFFFFF,FFF,FFFFFFFFFFFF:FF:FF  
FFFFFFFFFFFFF:FFFFFFFFFFFFFFFFFFFFF:FFFFFFFFFFFFFFFFFFFFF:FFFFFFFF:FFFFFFFFF  
@A00155:342:HHGFNDSXY:1:2567:27263:19586 1:N:0:GAACCTAG+TCCGCATA  
TTTGCTGCTCGACTCTCAGAACTCACCTACTGAGAACACGTTACACTTAGTGTGCTGCGCCCTAGCGT  
TTATCATTCTCATTTTTTCGTGTATAACGTTGCTGTCTTAATATTGTCTATGGATACCAA  
+  
FFFFFFFFFFFFFFFFFFFFFFFFFFFFFFFFFFFFFFFFFFFFFFFFFFFFFFFFFFFFFFFFF  
:FF:FFFFFFFFFFFFFFFFFFFFFFFFFFFFFFFFFFFFFFFFFFFFFFFFFFFFFFFFFFFFF  
@A00155:342:HHGFNDSXY:1:2439:20645:25066 2:N:0:GAACCTAG+TCCGCATA  
TCGACTCTCAGAACTCACCTACTGAGAACACGTTACACTTAGTGTGCTGCGCCCTAGCGTTTATCAT  
TCTCATTTTTTCGTGTATAACGTTGCTGTCTTAATATTGTCTATGGATACCAATACGTCGTCCCCAT  
+  
:FFFFFFFFFFFFFFFFFFFFFFFFFFFFFFFFFFFFFFFFFFFFFFFFFFFFFFFFFFFFF:FFFFFFFFFFFF  
FFFFFFFFF:FFFFFFFFFFFFFFFFFFFFF:FFFFFFFFFFFFF:FFFFFFFFFFFFFFFFFFFFF  
@A00155:342:HHGFNDSXY:1:2439:19407:25488 2:N:0:GAACCTAG+TCCGCATA  
TCGACTCTCAGAACTCACCTACTGAGAACACGTTACACTTAGTGTGCTGCGCCCTAGCGTTTATCAT  
TCTCATTTTTTCGTGTATAACGTTGCTGTCTTAATATTGTCTATGGATACCAATACGTCGTCCCCAT  
+  
FFFFFFFFFFFFFFFFFFFFF:FFFFFFFFFFFFFFFFFFFFFFFFFFFFFFFFFFFFFFFFFFFFF  
FFFFFFFFFFFFFFFFFFFFFFFFFFFFF:FFFFFFFFFFFFFFFFFFFFFFFFFFFFFFFFFFFFF  
@A00155:342:HHGFNDSXY:1:2439:19452:25880 2:N:0:GAACCTAG+TCCGCATA  
TCGACTCTCAGAACTCACCTACTTAGAACACGTTACACTTAGTGTGCTGCGCCCTAGCGTTTATCAT  
TCTCATTTTTTCGTGTATAACGTTGCTGTCTTAATATTGTCTATGGATACCAATACGTCGTCCCCAT  
+  
FFF,FF:F,FFF:,FFFF:FFFFF,:FF,FFFFFFFFF:FFFFFFFFFFFFF,:F:FFF,FFFFFFF  
F:F:FFFFFFF::FFFFFFF:FFFFFFFFFFFFFFFFFFFFF:FF:FFFFFFF:FFF:FFFFFFFFFFFFF  
@A00155:342:HHGFNDSXY:1:2602:27651:32503 2:N:0:GAACCTAG+TCCGCATA  
CTCTCAGAACTCACCTACTGAGAACACGTTACACTTAGTGTGCTGCGCCCTAGCGTTTATCATTCTC  
ATTTTTTCGTGTATAACGTTGCTGTCTTAATATTGTCTATGGATACCAATACGTCGTCCCCATTATG  
+  
FFFFFFFFFFFFFFFFFFFFFFFFFFFFF:FFF:FFFFFFFFFFFFFFFFFFFFF:FFFFFFFFFFFFFFFFF  
FFFFFFFFFFFFFFFFFFFFFFFFFFFFF:FFFFFFFFFFFFFFFFFFFFFFFFFFFFF  
@A00155:342:HHGFNDSXY:1:1218:15402:1329 1:N:0:GAACCTAG+TCCGCATA  
AAACTCACCTACTGAGAACACGTTACACTTAGTGTGCTGCGCCCTAGCGTTTATCATTCTCATTTTTT  
CGTGTATAACGTTGCTGTCTTAATATTGTCTATGGATACCAATACGTCGTCCCCATTATGTACGGAG  
+  
FFFFFFFFFFFFFFFFFFFFFFFFFFFFFFFFFFFFFFFFFFFFFFFFFFFFFFFFFFFFF:FFFFFFFFFFFFF  
FFFFFFFFFFFFFFFFFFFFFFFFFFFFF:FFFFFFFFFFFFFFFFFFFFFFFFFFFFF:  
@A00155:342:HHGFNDSXY:1:1218:15402:1329 1:N:0:GAACCTAG+TCCGCATA  
AAACTCACCTACTGAGAACACGTTACACTTAGTGTGCTGCGCCCTAGCGTTTATCATTCTCATTTTTT  
CGTGTATAACGTTGCTGTCTTAATATTGTCTATGGATACCAATACGTCGTCCCCATTATGTACGGAG  
+

@A00155:342:HHGFNDSXY:1:2474:24587:22185 1:N:0:GAACCTAG+TCCGCATA  
AGAACACGTTACACTTAGTGTGCTGCGCCCTAGCGTTTATCATTCTCATTTTTTCGTGTATAACGTTT  
GCTGTCTAATATTGTCTATGGATACCAATACGTCGTCCCCATTATGTACGGAGTCGTATACTCCCTT  
+  
FFFFFFFFFFFFFFFFFFFFFFFFFFFFFFFFFFFFFFFFFFFFFFFFFFFFFFFFFFFFFFFFFFFFFFFF  
FFFFFFFFFFFFFFFFFFFFFFFFFFFFFFFFFFFFFFFFFFFFFFFFFFFFFFFFFFFFFFFFFFFFFFFF  
@A00155:342:HHGFNDSXY:1:2647:20690:21825 2:N:0:GAACCTAG+TCCGCATA  
TACACTTAGTGTGCTGCGCCCTAGCGTTTATCATTCTCATTTTTTCGTGTATAACGTTTCGCTGTCTA  
ATATTGTCTATGGATACCAATACGTCGTCCCCATTATGTACGGAGTCGTATACTCCCTTCACATCAAA  
+  
FFFFFFFFFFFFFFFFFFFFFFFFFFFFFFFFFFFFFFFFFFFFFFFFFFFFFFFFFFFFFFFFFFFFFFFF  
:F:FFFFFFFFFFFFFFFFFFFFFFFFFFFFFFFFFFFFFFFFFFFFFFFFFFFFFFFFFFFFFFFFFFFFF,FFFF,F  
@A00155:342:HHGFNDSXY:1:2329:5782:17895 2:N:0:GAACCTAG+TCCGCATA  
TTAGTGTGCTGCGCCCTAGCGTTTATCATTCTCATTTTTTCGTGTATAACGTTTCGCTGTCTAATATT  
GTCTATGGATACCAATACGTCGTCCCCATTATGTACGGAGTCGTATACTCCCTTCACATCAAATACCC  
+  
FFFFFFFFFFFFFFFFFFFFFFFFFFFFFFFFFFFFFFFFFFFFFFFFFFFFFFFFFFFFFFFFFFFFFFFF  
FFFFFFFFFFFFFFFFFFFFFFFFFFFFFFFFFFFFFFFFFFFFFFFFFFFFFFFFFFFFFFFFFFFFFFFF  
@A00155:342:HHGFNDSXY:1:2636:8874:8563 1:N:0:GAACCTAG+TCCGCATA  
CTGCGCCCTAGCGTTTATCATTCTCATTTTTTCGTGTATAACGTTTCGCTGTCTAATATTGTCTATGG  
ATACCAATACGTCGTCCCCATTATGTACGGAGTCGTATACTCCCTTCACATCAAATACCCCGCTAAT  
+  
FFFFFFFFFFFFFFFFFFFFFFFFFFFFFFFFFFFFFFFFFFFFFFFFFFFFFFFFFFFFFFFFFFFFFFFF  
FFFFFFFFF:FFFFFFFFFFFFFFFFFFFFFFFFFFFFFFFFFFFFFFFFFFFFFFFFFFFFFFFFFFFFFFFF  
@A00155:342:HHGFNDSXY:1:1218:15402:1329 2:N:0:GAACCTAG+TCCGCATA  
TGCGCCCTAGCGTTTATCATTCTCATTTTTTCGTGTATAACGTTTCGCTGTCTAATATTGTCTATGGA  
TACCAATACGTCGTCCCCATTATGTACGGAGTCGTATACTCCCTTCACATCAAATACCCCGCTAATT  
+  
FFFFFFFFFFFFFFF,FFF:FFFFFFFFFFFFFFFFFFFFFFFFFFFFFFFFFFFFFFFFFFFFFFFFFFFFF,FFFFFFFFF:F:FF  
FFFFFFFFFFFFFFFFFFFFFFFFFFFFFFFFFFFFFFFFFFFFFFFFFFFFFFFFFFFFFFFFFFFFFFFFF,FF  
@A00155:342:HHGFNDSXY:1:2419:16803:4726 2:N:0:GAACCTAG+TCCGCATA  
CTAGCGTTTATCATTCTCATTTTTTCGTGTATAACGTTTCGCTGTCTAATATTGTCTATGGATTCCAA  
TACGTCGTCCCCATTATGTACGGAGTCGTATACTCCCTTCACATCAAATACCCCGCTAATTTGAAAT  
+  
FFFFFFFFFFFFFFF:FFFFFFFFFFFFFFFFFFFFFFFFFFFFFFFFFFFFFFFFFFFFFFFFFFFFFFFFF,FFFF,FFFF  
FFFFFFFFFFFFFFFFFFFFFFFFFFFFFFFFFFFFFFFFFFFFFFFFFFFFFFFFFFFFFFFFFFFFFFFFF  
@A00155:342:HHGFNDSXY:1:2419:16803:4726 1:N:0:GAACCTAG+TCCGCATA  
TTATCATTCTCATTTTTTCGTGTATAACGTTTCGCTGTCTAATATTGTCTATGGATACCAATACGTCG  
TCCCCATTATGTACGGAGTCGTATACTCCCTTCACATCAAATACCCCGCTAATTTGAAATATA  
+  
FFFFFFFFFFFFFFFFFFFFFFFFFFFFFFFFFFFFFFFFFFFFFFFFFFFFFFFFFFFFFFFFFFFFFFFFF:FFFFFFFFFFFF  
FFFFFFFFFFFFFFFFFFFFFFFFFFFFFFFFFFFFFFFFFFFFFFFFFFFFFFFFFFFFFFFFFFFFFFFFF  
@A00155:342:HHGFNDSXY:1:2518:1633:21699 2:N:0:GAACCTAG+TCCGCATA  
CATTCTCATTTTTTCGTGTAGAACGTTTCGCTGTCTAATATTGTCTATGGATACCAATACGTCGTCCC  
CATTATGTACGGAGTCGTATACTCCCTTCACATCAAATACCCCGCTAATTTGAAATATATGTAATTC  
+  
FFFFFFFFFFFFF:FFFFFFFFF,F:FF,FFFFFFFFFFFFFFFFF,FFFFF,FFFFFFFFFFFFFFFFF:FF:FF  
FFFFFFFFFFFFFFFFFFFFFFFFFFFFFFFFFFFFFFFFFFFFFFFFFFFFFFFFFFFFFFFFFFFFFFFFF,FFF:FFFFFFFFFFFFFFFFFFFFF,FFFFF:FF  
@A00155:342:HHGFNDSXY:1:2410:26720:26694 2:N:0:GAACCTAG+TCCGCATA  
CATTCTCATTTTTTCGTGTATAACGTTTCGCTGTCTAATATTGTCTATGGATACCAATACGTCGTCCC  
CATTATGTACGGAGTCGTATACTCCCTTCACATCAAATACCCCGCTAATTTGAAATATATGTAATTC  
+  
FFFFFFFFFFFFF:FFFFFFFFF:FFFFFFFFFFFFFFFFFFFFFFFFF:FFFFF,FFFFF:FFFFF:FFFFFFFFF:FFFFF:  
FFFFFFFFFFFFFFFFFFFFFFFFF:FFFFFFFFFFFFFFFFFFFFFFFFFFFFFFFFFFFFFFFFFFFFFFFFFFFFF



@A00155:342:HHGFNDSXY:1:1436:1470:20666 2:N:0:GAACCTAG+TCCGCATA  
CATTCTCATTTTTTCGTGTATAACGTTGCTGTCCTAATATTGTCTATGGATACCAATACGTCGTCCC  
CATTATGTACGGAGTCGTATACTCCCTTCACATCAAATACCCCGCTAATTTGAAATATATGTAATTC  
+  
FFFFFFFFF::F:FFFFFFFFFFFFFFFFFFFFFFFFFFFFFFFFFFFFFFFFFFFFFFFFFFFFFFFFFFFFFFFF  
FFFFFFFFFFFFFFFFFFFFFFFFFFFFFFFFFFFFFFFFFFFFFFFFFFFFFFFFFFFFFFFFFFFFFFFFFFFFF  
@A00155:342:HHGFNDSXY:1:1539:31602:23719 1:N:0:GAACCTAG+TCCGCATA  
ATTCTCATTTTTTCGTGTATAACGTTGCTGTCCTAATATTGTCTATGGATACCAATACGTCGTCCCC  
ATTATGTACGGAGTCGTATACTCCCTTCACATCAAATACCCCGCTAATTTGAAATATATGTAATTCA  
+  
FFFFFFFFFFFFFFFFFFFFFFFFFFFFFFFFFFFFFFFFFFFFFFFFFFFFFFFFFFFFFFFFFFFFFFFFFFFFF  
FFFFFFFFFFFFFFFFFFFFFFFFFFFFFFFFFFFFFFFFFFFFFFFFFFFFFFFFFFFFFFFFFFFFFFFFFFFFF  
@A00155:342:HHGFNDSXY:1:2367:7491:17033 1:N:0:GAACCTAG+TCCGCATA  
TTCTCATTTTTTCGTGTATAACGTTGCTGTCCTAATATTGTCTATGGATACCAATACGTCGTCCCCA  
TTATGTACGGAGTCGTATACTCCCTTCACATCAAATACCCCGCTAATTTGAAATATATGTAATTCAG  
+  
FFFFFFFFFFFFFFFFFFFFFFFFFFFFFFFFFFFFFFFFFFFFFFFFFFFFFFFFFFFFFFFFFFFFFFFFFFFFF  
FFFFFFFFFFFFFFFFFFFFFFFFFFFFFFFFFFFFFFFFFFFFFFFFFFFFFFFFFFFFFFFFFFFFFFFFFFFFF  
@A00155:342:HHGFNDSXY:1:1623:19786:21324 1:N:0:GAACCTAG+TCCGCATA  
CTCATTTTTTCGTGTATAACGTTGCTGTCCTAATATTGTCTATGGATACCAATACGTCGTCCCCATT  
ATGTACGGAGTCGTATACTCCCTTCACATCAAATACCCCGCTAATTTGAAATATATGTAATTCAGAG  
+  
FFFFFFFFFFFFFFFFFFFFFFFFFFFFFFFFFFFFFFFFFFFFFFFFFFFFFFFFFFFFFFFFFFFFFFFFFFFFF  
FFFFFFF,FFFFFFFFFFFFFFFFFFFFFFFFFFFFFFFFFFFFFFFFFFFFFFFFFFFFFFFFFFFFFFFFFFFFF  
@A00155:342:HHGFNDSXY:1:1114:29206:16501 1:N:0:GAACCTAG+TCCGCATA  
CTCATTTTTTCGTGTATAACGTTGCTGTCCTAATATTGTCTATGGATACCAATACGTCGTCCCCATT  
ATGTACGGAGTCGTATACTCCCTTCACATCAAATACCCCGCTAATTTGAAATATATGTAATTCAGAG  
+  
F:FFFFFFFFFFFFFFFFFFFFFFFFFFFFFFFFFFFFFFFFFFFFFFFFFFFFFFFFFFFFFFFFFFFFFFFFFFFFF  
FFFFFFF,FFF,FFFFFFFFF,F:FFFFFFFFFFFFF,FFFFFFFFFFFFFFFFFFFFFFFFFFFFFFFFFFFFF  
@A00155:342:HHGFNDSXY:1:2407:24948:25003 1:N:0:GAACCTAG+TCCGCATA  
TCATTTTTTCGTGTATAACGTTGCTGTCCTAATATTGTCTATGGATACCAATACGTCGTCCCCATTA  
TGTACGGAGTCGTATACTCCCTTCACATCAAATACCCCGCTAATTTGAAATATATGTAATTCAGAGC  
+  
F:FFFFFFFFFFFFFFFFFFFFFFFFFFFFFFFFFFFFFFFFFFFFFFFFFFFFFFFFFFFFFFFFFFFFFFFFFFFFF  
F:FF:FFFFFFFFFFFFFFFFFFFFFFFFFFFFFFFFFFFFFFFFFFFFFFFFFFFFFFFFFFFFFFFFFFFFF,FF,F,F,F  
@A00155:342:HHGFNDSXY:1:2407:24948:25003 2:N:0:GAACCTAG+TCCGCATA  
TTTTTTCGTGTATAACGTTGCTGTCCTAATATTGTCTATGGATACCAATACGTCGTCCCCATTATGT  
ACGGAGTCGTATACTCCCTTCACATCAAATACCCCGCTAATTTGAAATATATGTAAT  
+  
F,FFFFFFFFF:FF,FF,FFFFFFFFF:F:FFFFFFFFFFFFF:FFFFFFFFF:FFFFFFFFF,F,FFFFFFF  
F::FFFFFFFFFFFFF:F:FFFFFFFFFFFFFFFFFFFFFFFFFFFFFFFFFFFFFFFFFFFFFFFFFFFFFFFFFFFFF  
@A00155:342:HHGFNDSXY:1:2367:7491:17033 2:N:0:GAACCTAG+TCCGCATA  
TTCGTGTATAACGTTGCTGTCCTAATATTGTCTATGGATACCAATACGTCGTCCCCATTATGTACGG  
AGTCGTATACTCCCTTCACATCAAATACCCCGCTAATTTGAAATATATGTAATTCAGAGCCGTATTC  
+  
FFFFFFFFF:FFFFFFFFFFFFFFFFFFFFF::FFFFF:F:FFFFFFFFFFFFFFFFFFFFFFFFFFFFFFFFFFFFF  
FFFFFFFFFFFFFFFFFFFFF:F:FFFFFFF:FFFFFFFFFFFFFFFFFFFFFFFFFFFFFFFFFFFFFFFFFFFFF  
@A00155:342:HHGFNDSXY:1:1539:31602:23719 2:N:0:GAACCTAG+TCCGCATA  
CGTGTATAACGTTGCTGTCCTAATATTGTCTATGGATACCAATACGTCGTCCCCATTATGTACGGAG  
TCGTATACTCCCTTCACATCAAATACCCCGCTAATTTGAAATATATGTAATTCAGAGCCGTATTCAT  
+  
FFFFFFF::FFFFFFF:FFFFFFF:,F:FFFFFFFFFFFFF,FFFFFFFFFFFFFFFFFFFFFFFFFFFFF:FFFFFFF  
FFFFFFF:FFFFFFFFFFFFFFFFFFFFF:FFF::FFFFFFFFFFFFFFFFFFFFFFFFFFFFFFFFFFFFFFFFFFFFF

```
@A00155:342:HHGFNDSXY:1:2647:20690:21825 1:N:0:GAACCTAG+TCCGCATA
TGATAACGTTTCGTGTCCTAATATTGTCTATGGATACCAATACGTCGTCCCCATTATGTACGGAGTC
GTATACTCCCTTCACATCAAATACCCCCGCTAATTTGAAATATATGTAATTCAGAGCCGTATTCATGA
+
FFF:FFFFFFFFFFFFFFFFFFFFFFFFFFFFFFFFFFFFFFFFFFFFFFFFFFFFFFFFFFFFFFFFFFFFF
FFFFFFFFFFFFFFFFFFFFFFFFFFFFFFFFFFFFFFFFFFFFFFFFFFFFFFFFFFFFFFFFFFFFFFFFFFFF
@A00155:342:HHGFNDSXY:1:1513:16902:11694 1:N:0:GAACCTAG+TCCGCATA
ACGTTTCGTGTCCTAATATTGTCTATGGATACCAATACGTCGTCCCCATTATGTACGGAGTCGTATAC
TCCCTTCACATCAAATACCCCCGCTAATTTGAAATATATGTAATTCAGAGCCGTATTCATGAATGTAG
+
FFFFFFFFFFFFFFFFFFFFFFFFFFFFFFFFFFFFFFFFFFFFFFFFFFFFFFFFFFFFFFFFFFFFFFFFFFFF
FFFFFFFFFFFFFFFFFFFF:FFFFFFFFFFFFFFFFFFFFFFFFFFFFFFFFFFFFFFFFFFFFFFFFFFFFFFF
@A00155:342:HHGFNDSXY:1:2319:20139:26099 1:N:0:GAACCTAG+TCCGCATA
CGCTGTCCTAATATTGTCTATGGATACCAATACGTCGTCCCCATTATGTACGGAGTCGTATACTCCCT
TCACATCAAATACCCCCGCTAATTTGAAATATATGTAATTCAGAGCCGTATTCATGAATGTAGTAAGC
+
FFFFFFFFFFFFFFFFFFFFFFFFFFFFFFFFFFFFFFFFFFFFFFFFFFFFFFFFFFFFFFFFFFFFFFFFFFFF
FFFFFFFFFFFFFFFFFFFF:FFFFFFFFFFFFFFFFFFFFFFFFFFFFFFFFFFFFFFFFFFFFFFFFFFFFFFF
@A00155:342:HHGFNDSXY:1:2657:19045:27524 2:N:0:GAACCTAG+TCCGCATA
CTGTCCTAATATTGTCTATGGATACCAATACGTCGTCCCCATTATGTACGGAGTCGTATACTCCCTTC
ACATCAAATACCCCCGCTAATTTGAAATATATGTAATTCAGAGCCGTATTCATGAATGTAGTAAGCCT
+
FFFFFFFFFFFFFFFFFFFFFFFFFFFFFFFFFFFFFFFFFFFFFFFFFFFFFFFFFFFFFFFFFFFFFFFFFFFF
FFFFFFFFFFFFFFFFFFFF:FFFFFFFFFFFFFFFFFFFFFFFFFFFFFFFFFFFFFFFFFFFFFFFFFFFFFFF
@A00155:342:HHGFNDSXY:1:2638:20039:15499 2:N:0:GAACCTAG+TCCGCATA
CTGTCCTAATATTGTCTATGGATACCAATACGTCGTCCCCATTATGTACGGAGTCGTATACTCCCTTC
ACATCAAATACCCCCGCTAATTTGAAATAGATGTAATTCAGAGCCGTATTCATGAATGTAGTAAGCCT
+
FFFFFFFFFFFFFFFFFFFFFFFFFFFFFFFFFFFFFFFFFFFFFFFFFFFFFFFFFFFFFFFFFFFFFFFFFFFF
FFFFFFFFFFFFFFFFFFFF,FFFFFFFFFFFFFFFFFFFFFFFFFFFFFFFFFFFFFFFFFFFFFFFFFFFFFFF
@A00155:342:HHGFNDSXY:1:2657:18204:20995 2:N:0:GAACCTAG+TCCGCATA
CTGTCCTAATATTGTCTATGGATACCAATACGTCGTCCCCATTATGTACGGAGTCGTATACTCCCTTC
ACATCAAATACCCCCGCTAATTTGAAATATATGTAATTCAGAGCCGTATTCATGAATGTAGTAAGCCT
+
FFFFFFF,FFFFFFFFF,FFFFFFFFFFFFFFFFFFFFFFFFFFFFFFFFFFFFFFFFFFFFFFFFFFFFFFF:FFFFFFFFF
FFFFFFFFFFFFFFFFFFFFFFFFFFFFFFFFFFFFFFFFFFFF:FFFFFFFFFFFF:FFFFFFFFFFFFFFFFFFFFFFFFF
@A00155:342:HHGFNDSXY:1:1442:6189:26522 2:N:0:GAACCTAG+TCCGCATA
GTCCTAATATTGTCTATGGATACCAATACGTCGTCCCCATTATGTACGGAGTCGTATACTCCCTTCAC
ATCAAATACCCCCGCTAATTTGAAATATATGTAATTCAGAGCCGTATTCATGAATGTAGTAAGCCTCC
+
FFF:FFFFFFFFFFFFFFFFFFFFFFFFFFFF,FFF:F,,FFF:FFFFFFFFFFFFFFFFFFFFFFFFFFFFFFF
FFFFFFFFFFFFFFFFFFFFFFFFFFFFFFFFFFFF:FFFFFFFFFFFFFFFFFFFFFFFFFFFFFFFFFFFFFFF
@A00155:342:HHGFNDSXY:1:1114:29206:16501 2:N:0:GAACCTAG+TCCGCATA
CCTAATATTGTCTATGGATACCAATACGTCGTCCCCATTATGTACGGAGTCGTATACTCCCTTCACAT
CAAATACCCCCGCTAATTTGAAATATATGTAATTCAGAGCCGTATTCATGAATGTAGTAAGCCTCCAT
+
FFF:FFFFFFFFF:FFFFF:FFFFFFFFFFFFFFFFFFFFFFFFFFFFFFFFFFFFFFFFFFFFF:FFF:FFFFF:FFFFF
FFFF:FFFFFFFFFFFFFFFFFFFFFFFFFFFFFFFFFFFFFFFFFFFFF::FFFFFFFFFFFFF:FFFF:FFFF
@A00155:342:HHGFNDSXY:1:1623:19786:21324 2:N:0:GAACCTAG+TCCGCATA
CCTAATATTGTCTATGGATACCAATACGTCGTCCCCATTATGTACGGAGTCGTATACTCCCTTCACAT
CAAATACCCCCGCTAATTTGAAATATATGTAATTCAGAGCCGTATTCATGAATGTAGTAAGCCTCCAT
+
FFFFFFFFFFFFF::FF:FFFFFFFFFFFFFFFFFFFFFFFFFFFF:FFFFFFFFFFFFFFFFFFFF:FFFFFFFFFFFFFFFFF
FFFF:F:FF::FFFFFFFFFFFFFFFFFFFF:FFFFFFFFFFFFFFFFFFFFFFFFFFFFFFFFFFFFFFFFFFFFF
```

[illegible]

AATACGTCGTCCCCATTATGTACGGAGTCGTATACTCCCTTACATCAAATACCCCCGCTAATTTGAA  
ATATATGTAATTCAGAGCCGTATTCATGAATGTAGTAAGCCTCCATCCTGATAGTAGTGTTCCCTTTCA  
+  
FF:FFFFFFFFF::FFFFFFFFF:,FFFF:FF:FFFFFFFFFFFFFFFFFFFFFFF:FFFFFFFF:FFFFFFFFF  
FFFFFFFFFFFFFFFFFFFFFFF::FFFF:FFFFFFFF:FFFFFFFFFFFFFFFFFFFFFFF:FFFFFFFFFFFFFFFFF  
@A00155:342:HHGFNDSXY:1:2427:16676:21919 1:N:0:GAACCTAG+TCCGCATA  
GTCCCCATTATGTACGGAGTCGTATACTCCCTTACATCAAATACCCCCGCTAATTTGAAATATATGT  
AATTCAGAGCCGTATTCATGAATGTAGTAAGCCTCCATCCTGATAGTAGTGTTCCCTTTCACTTCGTAT  
+  
FFFFFFFFFFFFFFFFFFFFFFFFFFFFFFFFFFFFFFFFFFFFFFFFFFFFFFFFFFFFFFFFF:FFFFFFFFFFFFFFFFF  
FFFFFFFFFFFFFFFFFFFFFFFFFFFFFFFFFFFFFFFFFFFFFFFFFFFFFFFFFFFFFFFFFFFFFFFFFFFFFFFFF  
@A00155:342:HHGFNDSXY:1:1569:8350:7874 2:N:0:GAACCTAG+TCCGCATA  
CCATTATGTACGGAGTCGTATACTCCCTTACATCAAATACCCCCGCTAATTTGAAATATATGTAATT  
CAGAGCCGTATTCATGAATGTAGTAAGCCTCCATCCTGATAGTAGTGTTCCCTTTCACTTCGTATTCT  
+  
FFFFFFFFFFFFFFFFFFFFFFFFFFFFFFFFFFFFFFFFFFFFFFFFFFFFFFFFFFFFFFFFFFFFFFFFFFFFF  
FFFFFFFFFFFFFFFFFFFFFFFFFFFFFFFFFFFFFFFFFFFFFFFFFFFFFFFFFFFFFFFFFFFFFFFFFFFFF  
@A00155:342:HHGFNDSXY:1:2415:31774:15436 2:N:0:GAACCTAG+TCCGCATA  
ATTATGTTTCGGAGTCGTATACTCCCTTACATCAAATACCCCCGCTAATTTGAAATATATGTAATTCA  
GAGCCGTATTCATGAATGTAGTAAGCCTCCATCCTGATAGTAGTGTTCCCTTTCACTTCGTATTCTCATCA  
+  
FFF:FFFFFFFFFFFFFFFFFFFFFFFFFFFFFFFFF:FFFFFFFFFFFFFFF:FFFFFFFF:F:FFFFFFFFFFFF  
FFFFFFFFFFFFFFFFFFFFFFFFFFFFFFFFFFFFFFFFFFFF,FF,F:FFFFFFFFFFFF:FFFF,FFF:FFF  
@A00155:342:HHGFNDSXY:1:2427:16676:21919 2:N:0:GAACCTAG+TCCGCATA  
ATTATGTACGGAGTCGTATACTCCCTTACATCAAATACCCCCGCTAATTTGAAATATATGTAATTCA  
GAGCCGTATTCATGAATGTAGTAAGCCTCCATCCTGATAGTAGTGTTCCCTTTCACTTCGTATTCTCATCA  
+  
FFFFFFFFFFFFFFFFFFFFFFFFFFFFFFFFFFFFFFFFFFFFFFFFFFFFFFFFFFFFFFFFFFFFFFFFFFFFF  
FFFFFFFFFFFFFFFFFFFFFFFFFFFFFFFFFFFFFFFFFFFFFFFFFFFFFFFFFFFFFFFFFFFFFFFFFFFFF  
@A00155:342:HHGFNDSXY:1:2319:20139:26099 2:N:0:GAACCTAG+TCCGCATA  
TTATGTACGGAGTCGTATACTCCCTTACATCAAATACCCCCGCTAATTTGAAATATATGTAATTCAG  
AGCCGTATTCATGAATGTAGTAAGCCTCCATCCTGATAGTAGTGTTCCCTTTCACTTCGTATTCTCATCAC  
+  
F:FFF:FFFFFFFFFFFFFFFFFFFFFFFFFFFFFFFFFFFFFFFFFFFFFFFFFFFFFFFFFFFF,FFFFFFFFFFFFFFFFF  
FFFFFFFFFFFFFFFFFFFF,FFFFFFFFFFFF:F:FFFFFFFFFFFFFFFFFFFFFFFFFFFFFFFFFFFFFFFFFFFF  
@A00155:342:HHGFNDSXY:1:2415:31774:15436 1:N:0:GAACCTAG+TCCGCATA  
CGGAGTCGTATACTCCCTTACATCAAATACCCCCGCTAATTTGAAATATATGTAATTCAGAGCCGTA  
TTCATGAATGTAGTAAGCCTCCATCCTGATAGTAGTGTTCCCTTTCACTTCGTATTCTCATCACTAT  
+  
FFFFFFFFFFFF:FFFFF:FFFFFFFFFFFFFFFFFFFFFFFFFFFFFFFFFFFFFFFFFFFFFFFFFFFFFFFFFFFF  
FFFFFFFFFFFFFFFFFFFFFFFFFFFFFFFFFFFFFFFFFFFF,FFF:FFFFFFFFFFFFFFFFFFFFFFFFFFFF  
@A00155:342:HHGFNDSXY:1:2133:16938:24533 1:N:0:GAACCTAG+TCCGCATA  
CGGAGTCGTATACTCCCTTACATCAAATACCCCCGCTAATTTGAAATATATGTAATTCAGAGCCGTA  
TTCATGAATGTAGTAAGCCTCCATCCTGATAGTAGTGTTCCCTTTCACTTCGTATTCTCATCACTATGCTC  
+  
FFFFFFFFFFFFFFFFFFFFFFFFFFFFFFFFFFFFFFFFFFFFFFFFFFFFFFFFFFFFFFFFFFFFFFFFFFFFF  
FFFFFFFFFFFFFFFFFFFFFFFFFFFFFFFFFFFFFFFFFFFFFFFFFFFFFFFFFFFFFFFFFFFFFFFFFFFFF  
@A00155:342:HHGFNDSXY:1:1552:22607:24173 1:N:0:GAACCTAG+TCCGCATA  
GGAGTCGTATACTCCCTTACATCAAATACCCCCGCTAATTTGAAATATATGTAATTCAGAGCCGTAT  
TCATGAATGTAGTAAGCCTCCATCCTGATAGTAGTGTTCCCTTTCACTTCGTATTCTCATCACTATGCTCT

+  
FFFFFFFFFFFFFFFFFFFFFFFFFFFFFFFFFFFFFFFFFFFFFFFFFFFFFFFFFFFFFFFFFFFFFFFFFFFFF  
FFFFFFFFFFFFFFFFFFFFFFFFFFFFFFFFFFFFFFFFFFFFFFFFFFFFFFFFFFFFFFFFFFFFFFFFFFFFF  
@A00155:342:HHGFNDSXY:1:1552:22607:24173 1:N:0:GAACCTAG+TCCGCATA  
GGAGTCGTATACTCCCTTACATCAAATACCCCCGCTAATTTGAAATATATGTAATTCAGAGCCGTAT  
TCATGAATGTAGTAAGCCTCCATCCTGATAGTAGTGTTCCCTTTCACTTCGTATTCTCATCACTATGCTCT

+  
FFFFFFFFFFFFFFFFFFFFFFFFFFFFFFFFFFFFFFFFFFFFFFFFFFFFFFFFFFFFFFFFFFFFFFFFFFFFF  
FFFFFFFFFFFFFFFFFFFFFFFFFFFFFFFFFFFFFFFFFFFFFFFFFFFFFFFFFFFFFFFFFFFFFFFFFFFFF  
@A00155:342:HHGFNDSXY:1:1552:22607:24173 1:N:0:GAACCTAG+TCCGCATA  
GGAGTCGTATACTCCCTTACATCAAATACCCCCGCTAATTTGAAATATATGTAATTCAGAGCCGTAT  
TCATGAATGTAGTAAGCCTCCATCCTGATAGTAGTGTTCCCTTTCACTTCGTATTCTCATCACTATGCTCT

```
@A00155:342:HHGFNDSXY:1:1569:8350:7874 1:N:0:GAACCTAG+TCCGCATA
TCGTATACTCCCTTCACATCAAATACCCCCGCTAATTTGAAATATATGTAATTCAGAGCCGTATTCA
GAATGTAGTAAGCCTCCATCCTGATAGTAGTGTTCTTTCACTTCGTATTCATCACTATGCTCTCC
+
FFFFFFFFFFFFFFFFFFFFFFFFFFFFFFFFFFFFFFFFFFFFFFFFFFFFFFFFFFFFFFFFFFFFF:FFFFFFFFFFFFFFF:FFFFFFFFFFFF
FFFFFFFFFFFFFFFFFFFFFFFFFFFFFFFFFFFFFFFFFFFFFFFFFFFFFFFFFFFFFFFFFFFFFFFFFFFF
@A00155:342:HHGFNDSXY:1:1221:29939:4178 1:N:0:GAACCTAG+TCCGCATA
TCGTATACTCCCTTCACATCAAATACCCCCGCTAATTTGAAATATATGTAATTCAGAGCCGTATTCA
GAATGTAGTAAGCCTCCATCCTGATAGTAGTGTTCTTTCACTTCGTATTCATCACTATGCTCTCCTT
+
FFFFFFFFFFFFFFFFFFFFFFFFFFFFFFFFFFFFFFFFFFFFFFFFFFFFFFFFFFFFFFFFFFFFFFFFFFFF
FFFFFFFFFFFFFFFFFFFFFFFFFFFFFFFFFFFFFFFFFFFFFFFFFFFFFFFFFFFFFFFFFFFFFFFFFFFF
@A00155:342:HHGFNDSXY:1:2551:28682:6073 1:N:0:GAACCTAG+TCCGCATA
TCGTATACTCCCTTCACATCAAATACCCCCGCTAATTTGAAATATATGTAATTCAGAGCCGTATTCA
GAATGTAGTAAGCCTCCATCCTGATAGTAGTGTTCTTTCACTTCGTATTCATCACTATGCTCTCCTT
+
FFFFFFFFFFFFFFFFFFFFFFFFFFFFFFFFFFFFFFFFFFFFFFFFFFFFFFFFFFFFFFFFFFFFFFFFFFFF
FFFFFFFFFFFFFFFFFFFFFFFFFFFFFFFFFFFFFFFFFFFFFFFFFFFFFFFFFFFFFFFFFFFFFFFFFFFF
@A00155:342:HHGFNDSXY:1:2502:22535:29246 1:N:0:GAACCTAG+TCCGCATA
TCGTATACTCCCTTCACATCAAATACCCCCGCTAATTTGAAATATATGTAATTCAGAGCCGTATTCA
GAATGTAGTAAGCCTCCATCCTGATAGTAGTGTTCTTTCACTTCGTATTCATCACTATGCTCTCCTT
+
FFFFFFFFFFFFFFFFFFFFFFFFFFFFFFFFFFFFFFFFFFFFFFFFFFFFFFFFFFFFFFFFFFFFFFFFFFFF
FFFFFFFFFFFFFFFFFFFFFFFFFFFFFFFFFFFFFFFFFFFFFFFFFFFFFFFFFFFFFFFFFFFFFFFFFFFF
@A00155:342:HHGFNDSXY:1:1207:10393:9471 1:N:0:GAACCTAG+TCCGCATA
TCGTATACTCCCTTCACATCAAATACCCCCGCTAATTTGAAATATATGTAATTCAGAGCCGTATTCA
GAATGTAGTAAGCCTCCATCCTGATAGTAGTGTTCTTTCACTTCGTATTCATCACTATGCTCTCCTT
+
FFFFFFFFFFFFFFFFFFFFFFFFFFFFFFFFFFFFFFFFFFFFFFFFFFFFFFFFFFFFFFFFFFFFFFFFFFFF
FFFFFFFFFFFFFFFFFFFFFFFFFFFFFFFFFFFFFFFFFFFFFFFFFFFFFFFFFFFFFFFFFFFFFFFFFFFF
@A00155:342:HHGFNDSXY:1:1207:10393:9471 2:N:0:GAACCTAG+TCCGCATA
CCCTTCACATCAAATACCCCCGCTAATTTGAAATATATGTAATTCAGAGCCGTATTCAATGTAGT
AAGCCTCCATCCTGATAGTAGTGTTCTTTCACTTCGTATTCATCACTATGCTCT
+
FFFFFFF:F:FFFFFF,FFFFFFFFFFFFFFFFFFFFFFFFFFFFFFFFFFFFFFFFFFFFFFFFFFFFFF
FFFFFFFFFFFFFFFFFFFFFFFFFFFFFFFFFFFFFFFFFFFFFFFFFFFFFFFFFFFFFFFFFFFFFFFFFFFF
@A00155:342:HHGFNDSXY:1:2551:28682:6073 2:N:0:GAACCTAG+TCCGCATA
TCACATCAAATACCCCCGCTAATTTGAAATATATGTAATTCAGAGCCGTATTCAATGTAGTAAGC
CTCCATCCTGATAGTAGTGTTCTTTCACTTCGTATTCATCACTATGCTCT
+
FFFFFFFFFFFFFFFFFFFFFFFFFFFFFFFFFFFFFFFFFFFFFFFFFFFFFFFFFFFFFFFFFFFFFFFFFFFF
FFFFFFFFFFFFFFFFFFFFFFFFFFFFFFFFFFFFFFFFFFFFFFFFFFFFFFFFFFFFFFFFFFFFFFFFFFFF
@A00155:342:HHGFNDSXY:1:1221:29939:4178 2:N:0:GAACCTAG+TCCGCATA
TCACATCAAATACCCCCGCTAATTTGAAATATATGTAATTCAGAGCCGTATTCAATGTAGTAAGC
CTCCATCCTGATAGTAGTGTTCTTTCACTTCGTATTCATCACTATGCTCT
+
FFFFFFFFFFFF,FFFFFFFFFFFFFFFFFFFFFFFFFFFFFFFFFFFFFFFFFFFFFFFFFFFFFFFFFFFFF
FFFFFFFFFFFFFFFFFFFFFFFFFFFFFFFFFFFFFFFFFFFFFFFFFFFFFFFFFFFFFFFFFFFFFFFFFFFF
@A00155:342:HHGFNDSXY:1:2502:22535:29246 2:N:0:GAACCTAG+TCCGCATA
TCACATCAAATACCCCCGCTAATTTGAAATATATGTAATTCAGAGCCGTATTCAATGTAGTAAGC
CTCCATCCTGATAGTAGTGTTCTTTCACTTCGTATTCATCACTATGCTCT
+
FFFFFFFFFFFFFFFFFFFFFFFFFFFFFFFFFFFFFFFFFFFFFFFFFFFFFFFFFFFFFFFFFFFFFFFFFFFF
FFFFFFFFFFFFFFFFFFFFFFFFFFFFFFFFFFFFFFFFFFFFFFFFFFFFFFFFFFFFFFFFFFFFFFFFFFFF
@A00155:342:HHGFNDSXY:1:2502:22535:29246 2:N:0:GAACCTAG+TCCGCATA
```

@A00155:342:HHGFNDSXY:1:1552:22607:24173 2:N:0:GAACCTAG+TCCGCATA  
ACATCAAATACCCCCGCTAATTTGAAATATATGTAATTCAGAGCCGTATTCATGAATGTAGTAAGCCT  
CCATCCTGATAGTAGTGTTCCTTTCACTTCGTATTCATCACTATGCTCT

+

FFFFFFFFFFFFFFFFFFFFFFFFFFFFFFFFFFFFFFFFFFFFFFFFFFFFFFFFFFFFFFFFFFFFFFFF  
FFFFFFFFFFFFFFFFFFFFFFFFFFFFFFFFFFFFFFFFFFFFFFFFFFFFFFFFFFFFFFFFFFFFFFFF

@A00155:342:HHGFNDSXY:1:2659:8820:14199 1:N:0:GAACCTAG+TCCGCATA  
CAAATACCCCCGCTAATTTGAAATATATGTAATTCAGAGCCGTATTCATGAATGTAGTAAGCCTCCAT  
CCTGATAGTAGTGTTCCTTTCACTTCGTATTCATCACTATGCTCTCCTTCATTATTGACCACGCTCAT

+

FFFFFFF:FFFFFFFFFFFFFFFFFFFFFFFFFFFFFFFFFFFFFFFFFFFFFFFFFFFFFFFFFFFFFFFF  
FFFFFFFFFFFFFFFFFFFFFFFFFFFFFFFFFFFFFFFFFFFFFFFFFFFFFFFFFFFFFFFFFFFFFFFF

@A00155:342:HHGFNDSXY:1:2631:5511:6527 2:N:0:GAACCTAG+TCCGCATA  
AAATACCCCCGCTAATTTGAAATATATGTAATTCAGAGCCGTATTCATGAATGTAGTAAGCCTCCATC  
CTGAGAGTAGTGTTCCTTTCACTTCGTATTCATCACTATGCTCT

+

F:F,F:FF:F,::FFFFFFFFFFFFFFFF,FFFFFFFFFFFFFF:FFFFFFFFFFFFFFFF:F::FFFFFFF  
FFFF,FFFFFFFFFFFFFFFFFFFFFFFFFFFFFFFFFFFFFFFF:FFFFFFF

@A00155:342:HHGFNDSXY:1:2614:15691:6370 1:N:0:GAACCTAG+TCCGCATA  
TATGTAATTCAGAGCCGTATTCATGAATGTAGTAAGCCTCCATCCTGATAGTAGTGTTCCTTTCACTT  
CGTATTCATCACTATGCTCTCCTTCATTATTGACCACGCTCATTCTCTTCACACTCTCACATACCCAT

+

FFFFFFFFFFFFFFFFFFFFFFFFFFFFFFFFFFFFFFFFFFFFFFFFFFFFFFFFFFFFFFFFFFFFFFFF  
FFFFFFFFFFFFFFFFFFFFFFFFFFFFFFFFFFFFFFFFFFFFFFFFFFFFFFFFFFFFFFFFFFFFFFFF

@A00155:342:HHGFNDSXY:1:2659:10140:15608 2:N:0:GAACCTAG+TCCGCATA  
AGCCGTATTCATGAATGTAGTAAGCCTCCATCCTGATAGTAGTGTTCCTTTCACTTCGTATTCATCAC  
TATGATCTCCTTCATTATTGACCACGCTCATTCTCTTCACACTCTCACATACCCATGCCATAGCTTG

+

FFF,F:FFFF,FF,FFFFF:FFFF::FFFFFFFFF,:FFF,FFFFFF,F,,:F,FF,FFFFFF:FF,:  
,FFF,F,F:FFFFFFFFFFFF::F,F,,::,F,FFFFFFFF:FF,FF:F::F::FFF,F,F:FFFF:

@A00155:342:HHGFNDSXY:1:2659:8820:14199 2:N:0:GAACCTAG+TCCGCATA  
AGCCGTATTCATGAATGTAGTAAGCCTCCATCCTGATAGTAGTGTTCCTTTCACTTCGTATTCATCAC  
TATGCTCTCCTTCATTATTGACCACGCTCATTCTCTTCACACTCTCACATACCCATGCCATAGCTTGC

+

FF:F:FF:FFF:FFFFFFFFFFFFFFFF:FFFFFFFFF:FFFFFFFFFFFFFFFF:FFFFFFFFFFFFFFFF  
FFF,FFFFFFFFFFFFFFFFFFFFFFFFFFFFFFFFFFFFFFFFFFFFFFFFFFFFFFFFFFFFFFFF,FFFFFFFFF,FFF

@A00155:342:HHGFNDSXY:1:1157:6433:34147 1:N:0:GAACCTAG+TCCGCATA  
TAAGCCTCCATCCTGATAGTAGTGTTCCTTTCTCTTCGTATTCATCACTATGCTCTCCTTCATTATTG  
ACCACGCTCATTCTCTTCACACTCTCACATACCCATGCCATAGCTTGCCTCTGCTCCACCTCCATCTC

+

FFFFFFFFFFFFFFFFFFFFFFFFFFFFFFFFFFFFFFFF:FFFFFFFFFFFFFF:FFFFFFFFFFFFFFFF:F  
FFFFFFFFFFFF:FFFFFFFFFFFFFFFFFFFFFFFFFFFFFFFFFFFFFFFFFFFFFFFF:FFFFFFFFFFFFFFFF

@A00155:342:HHGFNDSXY:1:1157:6433:34147 2:N:0:GAACCTAG+TCCGCATA  
CCTCCATCCTGATAGTAGTGTTCCTTTCTCTTCGTATTCATCACTATGCTCTCCTTCATTATTGACCA  
CGCTCATTCTCTTCACACTCTCACATACCCATGCCATAGCTTGCCTCTGCTCCACCTCCATCTCGTGG

+

FFFFFFFFFFFFFFFFFFFFFFFFFFFFFFFF:FFFFFFFFFFFFFFFFFFFFFFFF,FFFFFFFFFFFFFFFF:FFF  
FFFFFFFFFFFFFFFFFFFFFFFFFFFFFFFFFFFFFFFF,FFFFFFFFFFFFFFFFFFFFFFFFFFFFFFFF

@A00155:342:HHGFNDSXY:1:2133:16938:24533 2:N:0:GAACCTAG+TCCGCATA  
CTGATAGTAGTGTTCCTTTCACTTCGTATTCATCACTATGCTCTCCTTCATTATTGACCACGCTCATT  
CTCTTCACACTCTCACATACCCATGCCATAGCTTGCCTCTGCTCCACCTCCATCTCGTGGTAAAACGT

+

FFFFFFFFFFFFFFFFFFFFFFFFFFFFFFFF:FFFFFFFFFFFFFFFFFFFFFFFFFFFFFFFFFFFFFFFF  
FFFFFFFFFFFFFFFFFFFFFFFF,FFFF:FFFFFFFFF:FFFFFFFFFFFFFF:FFFFFFFFFFFFFFFF

[illegible]

[illegible]



+  
GACCACGCTCATTCTCTTCACACTCTCACATACCCATGCCATAGCTTGCCTCTGCTCCACCTCCATCT  
CGTGGTAAAACGTGTCGTAATACGCCAGTAAAACGGCATGCATGGACTCAGTTGAATGCTGCGCATTA  
+  
FFFFFFFFFFFFFFFFFFFFFFFFFFFFFFFFFFFFFFFFFFFFFFFFFFFFFFFFFFFFFFFFFFFFFFFFFFFFF  
FFFFFFFF:FFFFFFFFFFFFFFFFFFFFFFFFFFFFFFFFFFFFFFFFFFFFFFFFFFFFFFFFFFFFFFFFFFFFF  
@A00155:342:HHGFNDSXY:1:2477:20907:7388 1:N:0:GAACCTAG+TCCGCATA  
GACCACGCTCATTCTCTTCACACTCTCACATACCCATGCCATAGCTTGCCTCTGCTCCACCTCCATCT  
CGTGGTAAAACGTGTCGTAATACGCCAGTAAAACGGCATGCATGGACTCAGTTGAATGCTGCGCATTA  
+  
FFFFFFFFFFFFFFFFFFFFFFFFFFFFFFFFFFFFFFFFFFFFFFFFFFFFFFFFFFFFFFFFFFFFFFFFFFFFF  
FFFFFFFFFFFFFFFFFFFFFFFFFFFFFFFFFFFFFFFFFFFFFFFFFFFFFFFFFFFFFFFFFFFFFFFFFFFFF  
@A00155:342:HHGFNDSXY:1:1624:17725:4539 1:N:0:GAACCTAG+TCCGCATA  
GACCACGCTCATTCTCTTCACACTCTCACATACCCATGCCATAGCTTGCCTCTGCTCCACCTCCATCT  
CGTGGTAAAACGTGTCGTAATACGCCAGTAAAACGGCATGCATGGACTCAGTTGAATGCTGCGCATTA  
+  
FFFFFFFFFFFFFFFF:FFFFFFFFFFF:FFFFFFF:FFF:::FFFFFF:FFFFFF:FFFFFFFFFFFF,FF:F,  
::FFFFFFFFFFFFFFFF:FFFFF::FFF,:FFFF:,FF:FFFF:FFF,FFF:FFF,:FFFFFFFF:F  
@A00155:342:HHGFNDSXY:1:1624:17192:4335 1:N:0:GAACCTAG+TCCGCATA  
GACCACGCTCATTCTCTTCACACTCTCACATACCCATGCCATAGCTTGCCTCTGCTCCACCTCCATCT  
CGTGGTAAAACGTGTCGTAATACGCCAGTAAAACGGCATGCATGGACTCAGTTGAATGCTGCGCATTA  
+  
FFFFFFFFFFFFFFFFFFFFFFFFFFFFFFFFFFFFFFFFFFFFFFFFFFFFFFFFFFFFFFFFFFFFFFFFFFFFF  
FFFFFFFFFFFFFFFFFFFFFFFFFFFFFFFFFFFFFFFFFFFFFFFFFFFFFFFFFFFFFFFFFFFFFFFFFFFFF  
@A00155:342:HHGFNDSXY:1:2346:5466:35728 1:N:0:GAACCTAG+TCCGCATA  
CCACGCTCATTCTCTTCACACTCTCACATACCCATGCCATAGCTTGCCTCTGCTCCACCTCCATCTCG  
TGTTAAAACGTGTCGTAATACGCCAGTAAAACGGCATGCATGGACTCAGTTGAATGCTGCGCATTA  
+  
FFFFFFFFFFFFFFFFFFFFFFFFFFFFFFFFFFFFFFFFFFFFFFFFFFFFFFFFFFFFFFFFFFFFFFFFFFFFF  
FFFFFFFF:FFFFFFFFFFFFFFFFFFFFFFFFFFFFFFFFFFFFFFFFFFFFFFFFFFFFFFFFFFFFFFFFFFFFF  
@A00155:342:HHGFNDSXY:1:2433:23276:2879 1:N:0:GAACCTAG+TCCGCATA  
CGCTCATTCTCTTCACACTCTCACATACCCATGCCATAGCTTGCCTCTGCTCCACCTCCATCTCGTGG  
TAAAACGTGTCGTAATACGCCAGTAAAACGGCATGCATGGACTCAGTTGAATGCTGCGCATTAAGTC  
+  
FFFFFFFFFFFFFFF:FFFFFFFFFFFFFFFFFFFFFFFFFFFFFFFFFFFFFFFFFFFFFFFFFFFFFFFFFFFFF  
FFFFFFFFFFFFFFFFFFFFFFFFFFFFFFFFFFFFFFFFFFFFFFFFFFFFFFFFFFFFFFFFFFFFFFFFFFFFF  
@A00155:342:HHGFNDSXY:1:1352:25409:22701 1:N:0:GAACCTAG+TCCGCATA  
GCTCATTCTCTTCACACTCTCACATACCCATGCCATAGCTTGCCTCTGCTCCACCTCCATCTCGTGGT  
AAAACGTGTCGTAATACGCCAGTAAAACGGCATGCATGGACTCAGTTGAATGCTGCGCATTAAGTCG  
+  
FFFFFFFFFFFFFFFFFFFFFFFFFFFFFFFFFFFFFFFFFFFFFFFFFFFFFFFFFFFFFFFFFFFFFFFFFFFFF  
:FFFFFFFFFFFFFFFFFFFFFFFFFFFFFFFFFFFFFFFFFFFFFFFFFFFFFFFFFFFFFFFFFFFFFFFFFFFFF  
@A00155:342:HHGFNDSXY:1:1352:25427:22701 1:N:0:GAACCTAG+TCCGCATA  
GCTCATTCTCTTCACACTCTCACATACCCATGCCATAGCTTGCCTCTGCTCCACCTCCATCTCGTGGT  
AAAACGTGTCGTAATACGCCAGTAAAACGGCATGCATGGACTCAGTTGAATGCTGCGCATTAAGTCG  
+  
FFFFFFFFFFFFFFFFFFFFFFFFFFFFFFFFFFFFFFFFFFFFF:F:FFFFFFFFFFFFFFFFFFFFFFFFFFFFF  
FFFFFFFFFFFFFFFFF:FFFFFFFFFFFFFFFFFFFFFFFFFFFFFFFFFFFFFFFFFFFFFFFFFFFFFFFFFFFFF  
@A00155:342:HHGFNDSXY:1:1628:21612:19946 2:N:0:GAACCTAG+TCCGCATA  
GCTCATTCTCTTCACACTCTCACATACCCATGCCATAGCTTGCCTCTGCTCCACCTCCATCTCGTGGT  
AAAACGTGTCGTAATACGCCAGTAAAACGGCATGCATGGACTCAGTTGAATGCTGCGCATTAAGTCG  
+

[illegible]

[illegible]

[illegible]

@A00155:342:HHGFNDSXY:1:2218:32651:6151 1:N:0:GAACCTAG+TCCGCATA  
GCTCCACCTCCATCTCGTGGTAAAACGTGTCGTAATACGCCAGTAAAACGGCATGCATGGACTCAGTT  
GAATGCTGCGCATTAAAGTCGTCAAAGTCATAGCACAGTGACTCGCAGTCCTTCAACATGTACCTCAG  
+  
FFFFFFFFFFFFFFFFFFFFFFFFFFFFFFFFFFFFFFFFFFFFFFFFFFFFFFFFFFFFFFFFFFFFFFFF  
FFFFFFFFFFFFFFFF:FFFFFFFFFFFFFFFFFFFFFFFFFFFFFFFFFFFFFFFFFFFFFFFFFFFFFFFF  
@A00155:342:HHGFNDSXY:1:1220:1416:35947 1:N:0:GAACCTAG+TCCGCATA  
CCACCTCCATCTCGTGGTAAAACGTGTCGTAATACGCCAGTAAAACGGCATGCATGGACTCAGTTGAA  
TGCTGCGCATTAAAGTCGTCAAAGTCATAGCACAGTGACTCGCAGTCCTTCAACATGTACCTCA  
+  
FFFFFFFFFFFFFFFFFFFFFFFFFFFFFFFF,FFFF:FFFFFFFFFFFFFFFFFFFFFFFFFFFFFFFF  
FFFFFFFFFFFFFFFFFFFFFFFFFFFFFFFF,FFFFFFFFFFFFFFFFFFFFFFFFFFFFFFFF:FFFFF:  
@A00155:342:HHGFNDSXY:1:1322:27453:28776 2:N:0:GAACCTAG+TCCGCATA  
CCTCCCTCTCGTGGTAAAACGTGTCGTAATACGCCAGTAAAACGGCATGCATGGACTCAGTTGAATGC  
TGCGCATTAAAGTCGTCAAAGTCATAGCACAGTGACTCGCAGTCCTTCAACATGTACCTCAGCCGTTT  
+  
:F:F,:FFFFFFFFFFFFFFFFFFFFFFFF:FFFFFFFFF:FFFFFFFFFFFFFFFFFFFFFFFFFFFFF  
FFFFFFFFFFFFFFFFFFFFFFFFFFFFFFFFFFFFFFFFFFFFFFFFFFFFFFFFFFFFFFFF:FFF,FF,FFFFFFFF  
@A00155:342:HHGFNDSXY:1:2323:2835:4492 2:N:0:GAACCTAG+TCCGCATA  
CCTCCATCTCGTGGTAAAACGTGTCGTAATACGCCAGTAAAACGGCATGCATGGACTCAGTTGAATGC  
TGCGCATTAAAGTCGTCAAAGTCATAGCACAGTGACTCGCAGTCCTTCAACATGTACCTCAGCCGTTT  
+  
FFFFFFFFFFFFFFFFFFFFFFFF:FFFFF:FFFFFFFFFFFFFFFFFFFFFFFFFFFFFFFFFFFFFFFF  
FFFF:FFFFFFFFFFFFFFFFFFFFFFFF:FFFFFFFFFFFFFFFFFFFFFFFFFFFFFFFFFFFFFFFF:FFFFFFFF  
@A00155:342:HHGFNDSXY:1:2234:24451:7670 2:N:0:GAACCTAG+TCCGCATA  
CCTCCATCTCGTGGTAAAACGTGTCGTAATACGCCAGTAAAACGGCATGCATGGACTCAGTTGAATGC  
TGCGCATTAAAGTCGTCAAAGTCATAGCACAGTGACTCGCAGTCCTTCAACATGTACCTCAGCCGTTT  
+  
FFFFF,FFFFFFFFF:FFFFFFFFFFFFFFFFFFFFFFFFFFFFFFFFFFFFFFFFFFFFFFFF,FFFF:FFF  
FFFFF,FFFFFFFFFFFFFFFFFFFFFFFFFFFFFFFFFFFFFFFFFFFFFFFFFFFFFFFFFFFFFFFF  
@A00155:342:HHGFNDSXY:1:1102:19144:2143 1:N:0:GAACCTAG+TCCGCATA  
ATCTCGTGGTAAAACGTGTCGTAATACGCCAGTAAAACGGCATGCATGGACTCAGTTGAATGCTGCGC  
ATTAAAGTCGTCAAAGTCATAGCACAGTGACTCGCAGTCCTTCAACATGTACCTCAGCCGTTTGTG  
+  
FFFFFFFFFFFFF,FFFFFF:FFFFFFFFFFFFFFFFFFFFFFFFFFFFFFFFFFFFFFFFFFFFFFFF:FFFF  
FFFF:FFFFFFFFF:FFFFFFFFFFFFFFFFFFFFFFFFFFFFFFFFFFFFFFFFFFFFFFFFFFFFF,FFF:F  
@A00155:342:HHGFNDSXY:1:1102:18756:10645 1:N:0:GAACCTAG+TCCGCATA  
ATCTCGTGGTAAAACGTGTCGTAATACGCCAGTAAAACGGCATGCATGGACTCAGTTGAATGCTGCGC  
ATTAAAGTCGTCAAAGTCATAGCACAGTGACTCGCAGTCCTTCAACATGTACCTCAGCCGTTTGTG  
+  
FFFFFFFFFFFFFFFFFFFFFFFFFFFFFFFFFFFFFFFFFFFFFFFFFFFFFFFFFFFFFFFFFFFFFFFF  
FFFFFFFFFFFFFFFFFFFFFFFFFFFFFFFF:FFFFFFFFFFFFFFFFFFFFFFFFFFFFFFFFFFFFFFFF  
@A00155:342:HHGFNDSXY:1:2323:2835:4492 1:N:0:GAACCTAG+TCCGCATA  
ATCTCGTGGTAAAACGTGTCGTAATACGCCAGTAAAACGGCATGCATGGACTCAGTTGAATGCTGCGC  
ATTAAAGTCGTCAAAGTCATAGCACAGTGACTCGCAGTCCTTCAACATGTACCTCAGCCGTTTGTGCA  
+  
FFFFFFFFFFFFFFFFFFFFFFFFFFFFFFFFFFFFFFFFFFFFFFFFFFFFFFFFFFFFFFFFFFFFFFFF  
FFFFFFFFFFFFFFFFFFFFFFFFFFFFFFFFFFFFFFFFFFFFFFFFFFFFFFFFFFFFFFFFFFFFFFFF  
@A00155:342:HHGFNDSXY:1:1322:27453:28776 1:N:0:GAACCTAG+TCCGCATA  
ATCTCGTGGTAAAACGTGTCGTAATACGCCAGTAAAACGGCATGCATGGACTCAGTTGAATGCTGCGC  
ATTAAAGTCGTCAAAGTCATAGCACAGTGACTCGCAGTCCTTCAACATGTACCTCAGCCGTTTGTGCA  
+  
F:FFFFFFFFFFFFFFFF:FFFF::FF:FFFFFFFF,FFFF:FFFF:FFFFFFFFFFFFFFFF:F:F  
FFFFFFFFF:FFF:FF,FFFF,,FF:FFFFFF,,,:F:F:FFF:F:FFFFFF,FF,:F::FFFF

@A00155:342:HHGFNDSXY:1:2478:4580:13463 1:N:0:GAACCTAG+TCCGCATA  
 ATCTCGTGGTAAAACGTGTCGTAATACGCCAGTAAAACGGCATGCATGGACTCAGTTGAATGCTGCGC  
 ATTAAGTCGTCAAAGTCATAGCACAGTGACTCGCAGTCCTTCAACATGTACCTCAGCCGTTTGTGCA  
 +  
 FFFFFFFFFFFFFFFFFFFFFFFFFFFFFFFFFFFFFFFFFFFFFFFFFFFFFFFFFFFFFFFFFFFFFFFFFF:FFFFFFFF  
 F:FFFFFFFFFFFFFFFFFFFFFFFFFFFFFFFFFFFFFFFFFFFFFFFFFFFFFFFFFFFFFFFFFFFFFFFF  
 @A00155:342:HHGFNDSXY:1:2234:24451:7670 1:N:0:GAACCTAG+TCCGCATA  
 ATCTCGTGGTAAAACGTGTCGTAATACGCCAGTAAAACGGCATGCATGGACTCAGTTGAATGCTGCGC  
 ATTAAGTCGTCAAAGTCATAGCACAGTGACTCGCAGTCCTTCAACATGTACCTCAGCCGTTTGTGCA  
 +  
 FFFFFFFFFFFFFFFFFFFFFFFFFFFFFFFFFFFFFFFFFFFFFFFFFFFFFFFFFFFFFFFFFFFFFFFFFF:FFFFF  
 FFFFFF:FFFFFFFFFFFFFFFFFFFFFFFFFFFFFFFFFFFFFFFFFFFFFFFFFFFFFFFFFFFFFFFF  
 @A00155:342:HHGFNDSXY:1:2410:31620:36338 1:N:0:GAACCTAG+TCCGCATA  
 ATCTCGTGGTAAAACGTGTCGTAATACGCCAGTAAAACGGCATGCATGGACTCAGTTGAATGCTGCGC  
 ATTAAGTCGTCAAAGTCATAGCACAGTGACTCGCAGTCCTTCAACATGTACCTCAGCCGTTTGTGCA  
 +  
 FFFFFFFFFFFFFFFFFFFFFFFFFFFFFFFFFFFFFFFFFFFFFFFFFFFFFFFFFFFFFFFFFFFFFFFFFF:FFFFF  
 FFFFFFFFFFFFFFFFFFFFFFFFFFFFFFFFFFFFFFFFFFFFFFFFFFFFFFFFFFFFFFFFFFFFFFFFFF:FFFFF  
 @A00155:342:HHGFNDSXY:1:2478:4580:13463 2:N:0:GAACCTAG+TCCGCATA  
 TCGTGGTAAAACGTGTCGTAATACGCCAGTAAAACGGCATGCATGGACTCAGTTGAATGCTGCGCATT  
 AAAGTCGTCAAAGTCATAGCACAGTGACTCGCAGTCCTTCAACATGTACCTCAGCCGTTTGTGCACTC  
 +  
 FFFF,FFFFFFFFFFFFFFFFFFFFFFFFFFFFFFFFFFFFFFFFFFFFFFFFFFFFFFFFFFFFFFFFFFFF  
 FFFFFFFFFFFFFFFFFFFFFFFFFFFFFFFFFFFFFFFFFFFFFFFFFFFFFFFFFFFFFFFFFFFFFFFFFF  
 @A00155:342:HHGFNDSXY:1:2410:31620:36338 2:N:0:GAACCTAG+TCCGCATA  
 TCGTGGTAAAACGTGTCGTAATACGCCAGTAAAACGGCATGCATGGACTCAGTTGAATGCTGCGCATT  
 AAAGTCGTCAAAGTCATAGCACAGTGACTCGCAGTCCTTCAACATGTACCTCAGCCGTTTGTGCACTC  
 +  
 FFFFFFFFFFFFFFFFFF:FFFFFFFFFFFFFFFF:FFFFFFFFFFFFFFFFFFFFFFFF:FFFFFFFFFFFF,  
 FFFFFFFFFFFFFFFFFFFFFFFFFF,FFFFFFFFFFFFFFFFFFFFFFFFFFFFFFFFFFFFFFFF:FFFFFFFF  
 @A00155:342:HHGFNDSXY:1:1319:21106:33786 2:N:0:GAACCTAG+TCCGCATA  
 CGTGGTAAAACGTGTCGTAATACGCCAGTAAAACGGCATGCATGGACTCAGTTGAATGCTGCGCATT  
 AAGTCGTCAAAGTCATAGCACAGTGACTCGCAGTCCTTCAACATGTACCTCAGCCGTTTGTGCACTCT  
 +  
 FFFFFFFFFFFFFFFFFFFFFFFFFFFFFFFFFFFFFFFFFFFFFFFFFFFFFFFFFFFFFFFFFFFFFFFFFF,FFFFF  
 FFFFFFFFFFFFFFFFFFFFFFFFFFFFFFFFFFFFFFFFFFFFFFFFFFFFFFFFFFFFFFFFFFFFFFFFFF:FFFFF  
 @A00155:342:HHGFNDSXY:1:2443:4010:26068 1:N:0:GAACCTAG+TCCGCATA  
 CGTGGTAAAACGTGTCGTAATACGCCAGTAAAACGGCATGCATGGACTCAGTTGAATGCTGCGCATT  
 AAGTCGTCAAAGTCATAGCACAGTGACTCGCAGTCCTTCAACATGTACCTCAGCCGTTTGTGCACTCT  
 +  
 FFFFFFFFFFFFFFFFFFFFFFFFFFFFFFFFFFFFFFFFFFFFFFFFFFFFFFFFFFFFFFFFFFFFFFFFFF  
 FFFFFFFFFFFFFFFFFFFFFFFFFFFFFFFFFFFFFFFFFFFFFFFFFFFFFFFFFFFFFFFFFFFFFFFFFF  
 @A00155:342:HHGFNDSXY:1:2327:18457:33677 1:N:0:GAACCTAG+TCCGCATA  
 AAAACGTGTCGTAATACGCCAGTAAAACGGCATGCATGGACTCAGTTGAATGCTGCGCATTAAAGTCG  
 TCAAAGTCATAGCACAGTGACTCGCAGTCCTTCAACATGTACCTCAGCCGTTTGTGCACTCTCTCGGC  
 +  
 FFFFFFFFFFFFFFFFFFFFFFFFFFFFFFFFFFFFFFFFFFFFFFFFFFFFFFFFFFFFFFFFFFFFFFFFFF  
 FFFFFFFFFFFFFFFFFFFFFFFFFFFFFFFFFFFFFFFFFFFFFFFFFFFFFFFFFFFFFFFFFFFFFFFFFF  
 @A00155:342:HHGFNDSXY:1:1427:32036:14325 1:N:0:GAACCTAG+TCCGCATA  
 AAACGTGTCGTAATACGCCAGTAAAACGGCATGCATGGACTCAGTTGAATGCTGCGCATTAAAGTCG  
 TCAAAGTCATAGCACAGTGACTCGCAGTCCTTCAACATGTACCTCAGCCGTTTGTGCACTCTCTCGGC  
 +  
 FFFFFFFFFFFFFFFFFFFFFFFFFFFFFFFFFFFFFFFFFFFFFFFFFFFFFFFFFFFFFFFFFFFFFFFFFF  
 FFFFFFFFFFFFFFFFFFFFFFFFFFFFFFFFFFFFFFFFFFFFFFFFFFFFFFFFFFFFFFFFFFFFFFFFFF  
 @A00155:342:HHGFNDSXY:1:1427:32036:14325 1:N:0:GAACCTAG+TCCGCATA  
 AAACGTGTCGTAATACGCCAGTAAAACGGCATGCATGGACTCAGTTGAATGCTGCGCATTAAAGTCG  
 TCAAAGTCATAGCACAGTGACTCGCAGTCCTTCAACATGTACCTCAGCCGTTTGTGCACTCTCTCGGC  
 +  
 FFFFFFFFFFFFFFFFFFFFFFFFFFFFFFFFFFFFFFFFFFFFFFFFFFFFFFFFFFFFFFFFFFFFFFFFFF  
 FFFFFFFFFFFFFFFFFFFFFFFFFFFFFFFFFFFFFFFFFFFFFFFFFFFFFFFFFFFFFFFFFFFFFFFFFF  
 FFFFFFFFFFFFFFFFFF:FFFFFFFFFFFFFFFFFFFFFFFFFFFFFFFFFFFFFFFF:FFFFFFFFFFFF

[illegible]

[illegible]



@A00155:342:HHGFNDSXY:1:1277:20112:26365 2:N:0:GAACCTAG+TCCGCATA  
CGGCATGCATGGACTCAGTTGAATGCTGCGCATTAAGTCGTCAAAGTCATAGCACAGTGACTCGCAG  
TCCTTCAACATGTACCTCAGCCGTTTGTGCACTCTCTCGGCTGATGCCTCCTCCCCTATCGGGAATCT  
+  
FFFFFFFFFFFFFFFFFFFFFFFFFFFFFFFFFFFFFFFFFFFFF:FF:FFFFFFFFFFFFFFFFF,FFFFFFFFFFFFFFFFF  
FFFFFFFFFFF:FFFFFFFFFFFFFFFFFFFFFFFFFFFFFFFFFFFFFFFFFFFFFFFFFFFFFFFFFFFFFFFFF:FFFFFFFFF  
@A00155:342:HHGFNDSXY:1:1462:28546:19147 2:N:0:GAACCTAG+TCCGCATA  
CGGCATGCATGGACTCAGTTGAATGCTGCGCATTAAGTCGTCAAAGTCATAGCACAGTGACTCGCAG  
TCCTTCAACATGTACCTCAGCCGTTTGTGCACTCTCTCGGCTGATGCCTCCTCCCCTATCGGGAATCT  
+  
FFFFFFFFFFFFFFFFFFFFFFFFFFFFFFFFFFFFFFFFFFFFFFFFFFFFFFFFFFFFFFFFFFFFFFFFFFFFFFFFF:FFFFFFFFF  
FFFFFFFFFFFFFFFFFFFFFFFFFFFFFFFFFFFFFFFFFFFFFFFFFFFFFFFFFFFFFFFFFFFFFFFFFFFFFFFFF:FFFFFFFFF  
@A00155:342:HHGFNDSXY:1:2174:12156:34319 2:N:0:GAACCTAG+TCCGCATA  
CGGCATGCATGGACTCAGTTGAATGCTGCGCATTAAGTCGTCAAAGTCATAGCACAGTGACTCGCAG  
TCCTTCAACATGTACCTCAGCCGTTTGTGCACTCTCTCGGCTGATGCCTCCTCCCCTATCGGGAATCT  
+  
:FFFFFFFFFFFFFFFFFFFFFFFFFFFFFFFFFFFFFFFFFFFFFFFFFFFFFFFFFFFFFFFFFFFFFFFFFFFFFFFFF  
FFFFFFFFFFFFFFFFFFFFFFFFFFFFFFFFFFFFFFFFFFFFFFFFFFFFFFFFFFFFFFFFFFFFFFFFFFFFFFFFF:  
@A00155:342:HHGFNDSXY:1:2248:20862:6402 2:N:0:GAACCTAG+TCCGCATA  
GGCATGCATGGACTCAGTTGAATGCTGCGCATTAAGTCGTCAAAGTCATAGCACAGTGACTCGCAGT  
CCTTCAACATGTACCTCAGCCGTTTGTGCACTCTCTCGGCTGATGCCTCCTCCCCTATCGGGAATCTG  
+  
FFFFFFFFFFFFFFFFFFFFFFFFFFFFFFFFFFFFFFFFFFFFFFFFFFFFFFFFFFFFFFFFFFFFFFFFFFFFFFFFF  
FFFFFFFFFFFFFFFFFFFFFFFFFFFFFFFFFFFFFFFFFFFFFFFFFFFFFFFFFFFFFFFFFFFFFFFFFFFFFFFFF:FFFFFFFFFFFFFFFFFFFFFFFFFFFFFFFFF  
@A00155:342:HHGFNDSXY:1:2161:31828:32972 1:N:0:GAACCTAG+TCCGCATA  
GCATGCATGGACTCAGTTGAATGCTGCGCATTAAGTCGTCAAAGTCATAGCACAGTGACTCGCAGTC  
TTCAACATGTACCTCAGCCGTTTGTGCACTCTCTCGGCTGATGCCTCCTCCCCTATCGGGAATCTGT  
+  
FFFFFFFFFFFFFFFFFFFFFFFFFFFFFFFFFFFFFFFFFFFFFFFFFFFFFFFFFFFFFFFFFFFFFFFFFFFFFFFFF  
FFFFFFFFFFFFFFFFFFFFFFFFFFFFFFFFFFFFFFFFFFFFFFFFFFFFFFFFFFFFFFFFFFFFFFFFFFFFFFFFF  
@A00155:342:HHGFNDSXY:1:2540:17092:33505 2:N:0:GAACCTAG+TCCGCATA  
ATGCATGGACTCAGTTGAATGCTGCGCATTAAGTCGTCAAAGTCATAGCACAGTGACTCGCAGTCCT  
TCAACATGTACCTCAGCCGTTTGTGCACTCTCTCGGCTGATGCCTCCTCCCCTATCGGGAATCTGTGC  
+  
FFFFFFFFFFFFFFFFFFFFFFFFFFFFFFFFFFFFFFFFFFFFFFFFFFFFFFFFFFFFFFFFFFFFFFFFFFFFFFFFF  
FFFFFFFFFFFFFFFFFFFFFFFFFFFFFFFFFFFFFFFFFFFFFFFFFFFFFFFFFFFFFFFFFFFFFFFFFFFFFFFFF  
@A00155:342:HHGFNDSXY:1:2641:29622:9017 2:N:0:GAACCTAG+TCCGCATA  
ATGGACTCAGTTGAATGCTGCGCATTAAGTCGTCAAAGTCATAGCACAGTGACTCGCAGTCCTTCAA  
CATGTACCTCAGCCGTTTGTGCACTCTCTCGGCTGATGCCTCCTCCCCTATCGGGAATCTGTGCTTAA  
+  
:FFFFFF::FFF,F:FF:FFFFFFFFFFFFFFFFFFFFFFFFFFFFFFFFF:F:FFFFFFFFFFFF:FFFFFFFFFFFF  
FFFFFFFFFFFFFFFFFFFFFFFFF:F,FFFFFFFFFFFFFFFFFFFFFFFFFFFFFFFFFFFFFFFFFFFFFFFFF:FFFFF  
@A00155:342:HHGFNDSXY:1:2348:19208:16470 1:N:0:GAACCTAG+TCCGCATA  
ATGGACTCAGTTGAATGCTGCGCATTAAGTCGTCAAAGTCATAGCACAGTGACTCGCAGTCCTTCAA  
CATGTACCTCAGCCGTTTGTGCACTCTCTCGGCTGATGCCTCCTCCCCTATCGGGAATCTGTGCTTAA  
+  
FFFFFFFFFFFFFFFFFFFFFFFFFFFFFFFFFFFFFFFFFFFFFFFFFFFFFFFFFFFFFFFFFFFFFFFFFFFFFFFFF  
FFFF:FFFF:FFFFFFFFFFFFFFFFFFFFFFFFFFFFFFFFFFFFFFFFFFFFFFFFFFFFFFFFFFFFFFFFF:FFFFFFFFFFFFFFFFFFFFF  
@A00155:342:HHGFNDSXY:1:1258:27073:32722 1:N:0:GAACCTAG+TCCGCATA  
GACTCAGTTGAATGCTGCGCATTAAGTCGTCAAAGTCATAGCACAGTGACTCGCAGTCCTTCAACAT  
GTACCTCAGCCGTTTGTGCACTCTCTCGGCTGATGCCTCCTCCCCTATCGGGAATCTGTGCTTAAA  
+  
FF,FF::F:FFFFFFFFFFFF,F,FF,FFFFFFFFFFFFFFFF::,F:FFFF:,,:FFF:FFFF,FFFFF  
:FFFF:,,:FFFFFF:FFFF::FFF::,,:F,:FFF:F,FFFFFFFFF,,FFFFFFFFFFFF,FFF

@A00155:342:HHGFNDSXY:1:2348:19208:16470 2:N:0:GAACCTAG+TCCGCATA  
ACTCAGTTGAATGCTGCGCATTAAGTCGTCAAAGTCATAGCACAGTGACTCGCAGTCCTTCAACATG  
TACCTCAGCCGTTTTGTGCACTCTCTCGGCTGATGCCTCCTCCCCTATCGGGAATCTGTGCTTAAACAC  
+  
FFFFFFFFFFFFFFFFFFFFFFFFFFFFFFFFFFFFFFFFFFFFFFFFFFFFFFFFFFFFFFFFFFFFF:FFFF:FFFFFFF  
FFFFFFFFFFFFF:FFFFFFFFFFFFFFFFFFFFFFFFFFFFFFFFFFFFFFFFFFFFFFFFFFFFF:FFFFFF:FFFFFFFFFFF,FFF  
@A00155:342:HHGFNDSXY:1:2614:15691:6370 2:N:0:GAACCTAG+TCCGCATA  
GAATGCTGCGCATTAAGTCGTCAAAGTCATAGCACAGTGACTCGCAGTCCTTCAACATGTACCTCAG  
CCGTTTGTGCACTCTCTCGGCTGATGCCTCCTCCCCTATCGGGAATCTGTGCTTAAACACTTCCTCAC  
+  
FFFFFFFFFFFFFFFFFFFFFFFFFFFFFFFFFFFFFFFFFFFFFFFFFFFFFFFFFFFFFFFFFFFFF:FFFFFFF  
F,FFFFFFFFFFFFFFFFFFFFFFFFFFFFFFFFFFFFFFFFFFFFFFFFFFFFFFFFFFFFFFFFFFFFF:  
,FFFFFFFFFFFFFFFFFFFFFFFFFFFFFFFFFFFFFFFFFFFFFFFFFFFFF:  
@A00155:342:HHGFNDSXY:1:2106:12563:2863 2:N:0:GAACCTAG+TCCGCATA  
GCGCATTAAGTCGTCAAAGTCATAGCACAGTGACTCGCAGTCCTTCAACATGTACCTCAGCCGTTTG  
TGCACTCTCTCGGCTGATGCCTCCTCCCCTATCGGGAATCTGTGCTTAAACACTTCCTCACACCGGTA  
+  
FFFFFFFFFFFFFFFFFFFFFFFFFFFFFFFFFFFFFFFFFFFFFFFFFFFFFFFFFFFFFFFFFFFFF:  
FFFFFFF,FFFFFFFFFFFFFFFFFFFFFFFFFFFFFFFFFFFFFFFFFFFFFFFFFFFFFFFFFFFFFFFFFFFFF:  
@A00155:342:HHGFNDSXY:1:1549:8865:34945 2:N:0:GAACCTAG+TCCGCATA  
CGCATTAAGTCGTCAAAGTCATAGCACAGTGACTCGCAGTCCTTCAACATGTACCTCAGCCGTTTGT  
GCACTCTCTCGGCTGATGCCTCCTCCCCTATCGGGAATCTGTGCTTAAACACTTCCTCACACCGGTAC  
+  
FFFFFFFFFFFFFFFFFFFFFFFFFFFFFFFFFFFFFFFFFFFFFFFFFFFFFFFFFFFFFFFFFFFFF:  
FFFFFFF,FFFFFFFFFFFFFFFFFFFFFFFFFFFFFFFFFFFFFFFFFFFFFFFFFFFFFFFFFFFFFFFFFFFFF:  
@A00155:342:HHGFNDSXY:1:1547:21694:1110 2:N:0:GAACCTAG+TCCGCATA  
AAGTCGTCAAAGTCATAGCACAGTGACTCGCAGTCCTTCAACATGTACCTCAGCCGTTTGTGCACTCT  
CTCGGCTGATGCCTCCTCCCCTATCGGGAATCTGTGCTTAAACACTTCCTCACACCGGTACATAGCAT  
+  
FFFFFFFFFFFFFFFFFFFFFFFFFFFFFFFFFFFFFFFFFFFFFFFFFFFFFFFFFFFFFFFFFFFFF:  
FFFFFFF,FFFFFFFFFFFFFFFFFFFFFFFFFFFFFFFFFFFFFFFFFFFFFFFFFFFFFFFFFFFFFFFFFFFFF:  
@A00155:342:HHGFNDSXY:1:2327:18457:33677 2:N:0:GAACCTAG+TCCGCATA  
AAGTCGTCAAAGTCATAGCACAGTGACTCGCAGTCCTTCAACATGTACCTCAGCCGTTTGTGCACTCT  
CTCGGCTGATGCCTCCTCCCCTATCGGGAATCTGTGCTTAAACACTTCCTCACACCGGTACATAGCAT  
+  
FFFFFFFFFFFFFFFFFFFFFFFFFFFFFFFFFFFFFFFFFFFFFFFFFFFFFFFFFFFFFFFFFFFFF:  
FFFFFFF,FFFFFFFFFFFFFFFFFFFFFFFFFFFFFFFFFFFFFFFFFFFFFFFFFFFFFFFFFFFFFFFFFFFFF:  
@A00155:342:HHGFNDSXY:1:2175:5330:2456 2:N:0:GAACCTAG+TCCGCATA  
TCAAAGTCATAGCACAGTGACTCGCAGTCCTTCAACATGTACCTCAGCCGTTTGTGCACTCTCTCGGC  
TGATGCCTCCTCCCCTATCGGGAATCTGTGCTTAAACACTTCCTCACACCGGTACATAGCATAGTTGG  
+  
FFF,FFFFFF:FFFFFF:FFFFFFFFFFFFFFFFF:FFFFFFFFFFFFFFFFF::FFFFFFFFFFFFFFFFFFFFF  
FFFFFFFFFFFFFFFFFFFFF,FFF:FFFFFFFFFFFFFFFFFFFFF:FFFFFFFFFFFFF:FFFFFFFFF,FFFFFFFFF  
@A00155:342:HHGFNDSXY:1:2174:4562:32722 2:N:0:GAACCTAG+TCCGCATA  
TCAAAGTCATAGCACAGTGACTCGCAGTCCTTCAACATGTACCTCAGCCGTTTGTGCACTCTCTCGGC  
TGATGCCTCCTCCCCTATCGGGAATCTGTGCTTAAACACTTCCTCACACCGGTACATAGCATAGTTGG  
+  
FFFFFFFFFFFFF,FFFFFFFFFFFFFFFFFFFFFFFFFFFFFFFFFFFFF,:FFFFFFFFFFFFFFFFFFFFF  
FFFFFFF,FFFFFFFFFFFFFFFFFFFFFFFFFFFFFFFFFFFFF:FF:FFFFF:FFFFFFFFF,FFFFFFFFFFFFF  
@A00155:342:HHGFNDSXY:1:2161:31828:32972 2:N:0:GAACCTAG+TCCGCATA  
CAAAGTCATAGCACAGTGACTCGCAGTCCTTCAACATGTACCTCAGCCGTTTGTGCACTCTCTCGGCT  
GATGCCTCCTCCCCTATCGGGAATCTGTGCTTAAACACTTCCTCACACCGGTACATAGCATAGTTGGT  
+



@A00155:342:HHGFNDSXY:1:1509:12924:18646 2:N:0:GAACCTAG+TCCGCATA  
 TACCTCAGCCGTTTGTGCACTCTCTCGGCTGATGCCTCCTCCCCTATCGGGAATCTGTGCTTAAACAC  
 TTCCTCACACCGGTACATAGCATAGTTGGTTATAACCGAACTTGTTAGATCTACTCCATATATAGCTC  
 +  
 FFFFFFFFFFFFFFFFFFFFFFFFFFFFFFFFFFFFFFFFFFFFFFFFFFFFFFFFFFFFFFFFFFFFFFFFFF:FFFFFFFFFFFFFFFFF  
 FFFFFFFFFFFFFFFFFFFFFFFFFFFFFFFFFFFFFFFFFFFFFFFFFFFFFFFFFFFFFFFFFFFFFFFFFF:FFFFFFF:FFFFFFFFFFFFFFFFF:  
 @A00155:342:HHGFNDSXY:1:1673:14968:21746 2:N:0:GAACCTAG+TCCGCATA  
 GTTTGTGCACTCTCTCGGCTGATGCCTCCTCCCCTATCGGGAATCTGTGCTTAAACACTTCCTCACAC  
 CGGTACATAGCATAGTTGGTTATAACCGAACTTGTTAGATCTACTCCATATATAGCTCTCATCTTGGC  
 +  
 FFFFFFFFFFFFFFFFFFFFFFFFFFFFFFFFFFFFFFFFFFFFFFFFFFFFFFFFFFFFFFFFFFFFFFFFFF,FFFFFFFFF  
 F:FFFFFF,FFFF:FFFFFFFFFFFFFFFFFFFFFFFFFFFFFFFFFFFFFFFFFFFFFFFFFFFFFFFFF  
 @A00155:342:HHGFNDSXY:1:2251:32597:34178 1:N:0:GAACCTAG+TCCGCATA  
 CACTCTCTCGGCTGATGCCTCCTCCCCTATCGGGAATCTGTGCTTAAACACTTCCTCACACCGGTACA  
 TAGCATAGTTGGTTATAACCGAACTTGTTAGATCTACTCCATATATAGCTCTCATCTTGGCCCACTCA  
 +  
 FFFFFFFFFFFFFFFFFFFFFFFFFFFFFFFFFFFFFFFFFFFFFFFFFFFFFFFFFFFFFFFFFFFFFFFFFF,FFFFFFFFF  
 F:FFFFFF,FFFF:FFFFFFFFFFFFFFFFFFFFFFFFFFFFFFFFFFFFFFFFFFFFFFFFFFFFFFFFF  
 @A00155:342:HHGFNDSXY:1:2265:5502:18474 1:N:0:GAACCTAG+TCCGCATA  
 CACTCTCTCGGCTGATGCCTCCTCCCCTATCGGGAATCTGTGCTTAAACACTTCCTCACACCGGTACA  
 TAGAATAGTTGGTTATAACCGAACTTGTTAGATCTACTCCATATATAGCTCTCATCTTGGCCCACTCA  
 +  
 F:FFFFFF,,,:F,FF,F,FFFFFFFFF,F::,FF:FF,,FF:,F:FFFF,FF:F:FFFF:F::  
 FFF,FF:FFFFFFFFFFFFFFFFFFFFFFFFF:FFF,:F,FF,F,FFF,FFFF:FFFF,F:FFFFFFFF,FFF  
 @A00155:342:HHGFNDSXY:1:1509:12924:18646 1:N:0:GAACCTAG+TCCGCATA  
 ACTCTCTCGGCTGATGCCTCCTCCCCTATCGGGAATCTGTGCTTAAACACTTCCTCACACCGGTACAT  
 AGCATAGTTGGTTATAACCGAACTTGTTAGATCTACTCCATATATAGCTCTCATCTTGGCCCACTCAT  
 +  
 FFFFFFFFFFFFFFFFFFFFFFFFFFFFFFFFFFFFFFFFFFFFFFFFFFFFFFFFFFFFFFFFFFFFFFFFFF,FFFFFFFFF  
 FFFFFFFFFFFFFFFFFFFFFFFFFFFFFFFFFFFFFFFFFFFFFFFFFFFFFFFFFFFFFFFFFFFFFFFFFF:FFFFFFFFF:FFFFF:FFFFFFFFFFFFFFFFF  
 @A00155:342:HHGFNDSXY:1:1148:22516:23578 1:N:0:GAACCTAG+TCCGCATA  
 ACTCTCTCGGCTGATGCCTCCTCCCCTATCGGGAATCTGTGCTTAAACACTTCCTCACACCGGTACAT  
 AGCATAGTTGGTTATAACCGAACTTGTTAGATCTACTCCATATATAGCTCTCATCTTGGCCCACTCAT  
 +  
 FFFFFFFFFFFFFFFFFFFFFFFFFFFFFFFFFFFFFFFFFFFFFFFFFFFFFFFFFFFFFFFFFFFFFFFFFF,FFFFFFFFF  
 FFFFFFFFFFFFFFFFFFFFFFFFFFFFFFFFFFFFFFFFFFFFFFFFFFFFFFFFFFFFFFFFFFFFFFFFFF,FFFFFFFFF:FFFFFFFFF  
 @A00155:342:HHGFNDSXY:1:2362:8495:14199 1:N:0:GAACCTAG+TCCGCATA  
 ACTCTCTCGGCTGATGCCTCCTCCCCTATCGGGAATCTGTGCTTAAACACTTCCTCACACCGGTACAT  
 AGCATAGTTGGTTATAACCGAACTTGTTAGATCTACTCCATATATAGCTCTCATCTTGGCCCACTCAT  
 +  
 FFFFFFFFFFFFFFFFFFFFFFFFFFFFFFFFFFFFFFFFFFFFFFFFFFFFFFFFFFFFFFFFFFFFFFFFFF:FFFFFFFFF:FFFFFFFFF  
 FFFFFFFFFFFFFFFFFF:FFFFFFFFFFFFFFFFF:FF,F:FF:FFFFFFFFFFFFFFFFF:FFFFFFF  
 @A00155:342:HHGFNDSXY:1:2251:32597:34178 2:N:0:GAACCTAG+TCCGCATA  
 TCTCTCGGCTGATGCCTCCTCCCCTATCGGGAATCTGTGCTTAAACACTTCCTCACACCGGTACATAG  
 CATAGTTGGTTATAACCGAACTTGTTAGATCTACTCCATATATAGCTCTCATCTTGGCCCACTCATAC  
 +  
 FFFFFFFFFFFFFFFFFFFFFFFFFFFFFFFFFFFFFFFFFFFFFFFFFFFFFFFFFFFFFFFFFFFFFFFFFF,FFFFFFFFF  
 FFFFFFFFFF,FFFFFFFFF:FFFFFFFFFFFFFFFFFFFFFFFFFFFFFFFFFFFFFFFFF:FF:FFFFFFFFF:F  
 @A00155:342:HHGFNDSXY:1:2265:5502:18474 2:N:0:GAACCTAG+TCCGCATA  
 CTCTCGGCTGATGCCTCCTCCCCTATCGGGAATCTGTGCTTAAACACTTCCTCACACCGGTACATAGC  
 ATAGTTGGTTATAACCGAACTTTTTAGATCTACTCCATATATAGCTCTCATCTTGGCCCACTCATA  
 +  
 FFFFF:F,F:FFFFFF::F::FFFFFF:FFFFFFFFF,FF,FFFFFFFFF:FFF:FFFF:,F  
 FFFF::F::FF:FFFFFF,F,F:FFFF:FFF,FFFFFF,FFF:FF:FFF,,,,FF:FF:F

[illegible]

@A00155:342:HHGFNDSXY:1:2107:26603:2347 2:N:0:GAACCTAG+TCCGCATA  
GCTTAAACACTTCCTCACCCCGGTACATAGCATAGTTGGTTATAAACCGAACTTGTTAGATCTACTCCA  
TATATAGCTCTCATCTTGGCCCACTCATACTTAACACTTGCCCACGCCTTTATTTCTGGTTTTCTCTT  
+  
FFFFFFFFFFFFFFFFFFFFFFF,FFFFF:FF,FFFFFFFFFFFFFFFFFFFFFFFFFFFFFFFFFFFFFFFF  
FF,FFFFFFFFFFFFFFFFFFFFFFFFFFFFFFFFFFFFFFFFFFFFFFFFFFFFFFFFFFFFFFFFFFFFFFFF  
@A00155:342:HHGFNDSXY:1:1632:14841:19429 2:N:0:GAACCTAG+TCCGCATA  
CTTAAACACTTCCTCACACCGGTACATAGCATAGTTGGTTATAAACCGAACTTGTTAGATCTACTCCAT  
ATATAGCTCTCATCTTGGCCCACTCATACTTAACACTTGCCCACGCCTTTATTTCTGGTTTTCTCTTA  
+  
FFFFFFFFFFFFFFFFFFFFFFFFFFFFFFFFFFFFFFFFFFFFFFFFFFFFFFFFFFFFFFFFFFFFFFFF  
FFFFFFFFFFFFFFFFFFFFFFFFFFFFFFFFFFFFFFFFFFFFFFFFFFFFFFFFFFFFFFFFFFFFFFFF  
@A00155:342:HHGFNDSXY:1:2648:14353:27289 1:N:0:GAACCTAG+TCCGCATA  
TTAAACACTTCCTCACACCGGTACATAGCATAGTTGGTTATAAACCGAACTTGTTAGATCTACTCCATA  
TATAGCTCTCATCTTGGCCCACTCATACTTAACACTTGCCCACGCCTTTATTTCTGGTTTTCTCTTAA  
+  
FFFFFFFFFFFFFFFFFFFFFFFFFFFFFFFFFFFFFFFFFFFFFFFFFFFFFFFFFFFFFFFFFFFFFFFF  
FFFFFFFFFFFFFFFFFFFFFFFFFFFFFFFFFFFFFFFFFFFFFFFFFFFFFFFFFFFFFFFFFFFFFFFF  
@A00155:342:HHGFNDSXY:1:2107:31792:2942 1:N:0:GAACCTAG+TCCGCATA  
CACACCGGTACATAGCATAGTTGGTTATAAACCGAACTTGTTAGATCTACTCCATATATAGCTCTCATC  
TTGGCCCACTCATACTTAACACTTGCCCACGCCTTTATTTCTGGTTTTCTCTTAAACATTGACGCTAT  
+  
FFFFFFFFFFFFFFFFFFFFFFFFFFFFFFFFFFFFFFFFFFFFFFFFFFFFFFFFFFFFFFFFFFFFFFFF  
FFFFFFFFFFFFFFFFFFFFFFFFFFFFFFFFFFFFFFFFFFFFFFFFFFFFFFFFFFFFFFFFFFFFFFFF  
@A00155:342:HHGFNDSXY:1:2107:26603:2347 1:N:0:GAACCTAG+TCCGCATA  
CACACCGGTACATAGCATAGTTGGTTATAAACCGAACTTGTTAGATCTACTCCATATATAGCTCTCATC  
TTGGCCCACTCATACTTAACACTTGCCCACGCCTTTATTTCTGGTTTTCTCTTAAACATTGACGCTAT  
+  
FFFFFFFFFFFFFFFFFFFFFFFFFFFFFFFFFFFFFFFFFFFFFFFFFFFFFFFFFFFFFFFFFFFFFFFF  
FFFFFFFFFFFFFFFFFFFFFFFFFFFFFFFFFFFFFFFFFFFFFFFFFFFFFFFFFFFFFFFFFFFFFFFF  
@A00155:342:HHGFNDSXY:1:2362:15365:29951 2:N:0:GAACCTAG+TCCGCATA  
CACCGGTACATAGCATAGTTGGTTATAAACCGAACTTGTTAGATCTACTCCATATATAGCTCTCATCTT  
GGCCCACTCATACTTAACACTTGCCCACGCCTTTATTTCTGGTTTTCTCTTAAACATTGACGCT  
+  
FFFFFFFFFFFFFFFFFFFFFFFFFFFFFFFFFFFFFFFFFFFFFFFFFFFFFFFFFFFFFFFFFFFFFFFF  
FFFFFFFFFFFFFFFFFFFFFFFFFFFFFFFFFFFFFFFFFFFFFFFFFFFFFFFFFFFFFFFFFFFFFFFF  
@A00155:342:HHGFNDSXY:1:1671:19334:5885 2:N:0:GAACCTAG+TCCGCATA  
CACCGGTACATAGCATAGTTGGTTATAAACCGAACTTGTTAGATCTACTCCATATATAGCTCTCATCTT  
GGCCCACTCATACTTAACACTTGCCCACGCCTTTATTTCTGGTTTTCTCTTAAACATTGACGCT  
+  
FFFFFFFFFFFFFFFFFFFFFFFFFFFFFFFFFFFFFFFFFFFFFFFFFFFFFFFFFFFFFFFFFFFFFFFF  
FFFFFFFFFFFFFFFFFFFFFFFFFFFFFFFFFFFFFFFFFFFFFFFFFFFFFFFFFFFFFFFFFFFFFFFF  
@A00155:342:HHGFNDSXY:1:2625:12138:19069 1:N:0:GAACCTAG+TCCGCATA  
TAGCATAGTTGGTTATAAACCGAACTTGTTAGATCTACTCCATATATAGCTCTCATCTTGGCCCACTCA  
TACTTAACACTTGCCCACGCCTTTATTTCTGGTTTTCTCTTAAACATTGACGCTATATGTTCTTCTT  
+  
FFFFFFFFFFFFFFFFFFFFFFFFFFFFFFFFFFFFFFFFFFFFFFFFFFFFFFFFFFFFFFFFFFFFFFFF  
FFFFFFFFFFFFFFFFFFFFFFFFFFFFFFFFFFFFFFFFFFFFFFFFFFFFFFFFFFFFFFFFFFFFFFFF  
@A00155:342:HHGFNDSXY:1:1137:16595:16360 1:N:0:GAACCTAG+TCCGCATA  
TAGCATAGTTGGTTATAAACCGAACTTGTTAGATCTACTCCATATATAGCTCTCATCTTGGCCCACTCA  
TACTTAACACTTGCCCACGCCTTTATTTCTGGTTTTCTCTTAAACATTGACGCTATATGTTCTTCTT  
+  
FFFFFFFFFFFFFFFFFFFFFFFFFFFFFFFFFFFFFFFFFFFFFFFFFFFFFFFFFFFFFFFFFFFFFFFF  
FFFFFFFFFFFFFFFFFFFFFFFFFFFFFFFFFFFFFFFFFFFFFFFFFFFFFFFFFFFFFFFFFFFFFFFF  
@A00155:342:HHGFNDSXY:1:1137:16595:16360 1:N:0:GAACCTAG+TCCGCATA  
TAGCATAGTTGGTTATAAACCGAACTTGTTAGATCTACTCCATATATAGCTCTCATCTTGGCCCACTCA  
TACTTAACACTTGCCCACGCCTTTATTTCTGGTTTTCTCTTAAACATTGACGCTATATGTTCTTCTT



[illegible]



@A00155:342:HHGFNDSXY:1:1249:12463:14246 1:N:0:GAACCTAG+TCCGCATA  
TATTTCTGTTTTCTCTTAAACATTGACGCTATATGTTCTTCTTCATCATGTTCAATGCCACGAACT  
TGGTCTGTGCCTGTACTCTTTTTTGATGTACTGTCTATCCTCTTCATACTGTGAATGTACACTTCCT  
+  
FFFFFFFFFFFFFFFFFFFFFFFF:FFFFFFFF:FFFFFFFF,FF:FFFFFFFFFFFFFFFF:FFFF,  
FFFF:FFFFFFFF,FFF:FFFFFFFF:FFF,FFFFFFFF:FFFF,:F::F,F:FFFFFFFF:F:F:  
@A00155:342:HHGFNDSXY:1:1369:27434:9549 1:N:0:GAACCTAG+TCCGCATA  
TGGTTTTCTCTTAAACATTGACGCTATATGTTCTTCTTCATCATGTTCAATGCCACGAACTTGGTCC  
TGTGCCTGTACTCTTTTTTGATGTACTGTCTATCCTCTTCATACTGTGAATGTACACTTCCTGATGGC  
+  
FFFFFFFFFFFFFFFFFFFFFFFF,FFFFFFFFFFFFFFFFFFFFFFFF:F::FFFFFFFF:F:F  
FFFFFFFF:FFFFFFFFFFFFFFFFFFFFFFFF:FFFF:FF:FFFF:FFFFFFFF  
@A00155:342:HHGFNDSXY:1:1369:27434:9549 2:N:0:GAACCTAG+TCCGCATA  
TGGTTTTCTCTTAAACATTGACGCTATATGTTCTTCTTCATCATGTTCAATGACACGAACTTGGTCC  
TGTGCCTGTACTCTTTTTTGATGTACTGTCTATCCTCTTCATACTGTGAATGTACACTTCCTGATGGC  
+  
FFFFFFFFFFFFFFFFFFFFFFFF:FFFFFFFFFFFFFFFF:FFFF,FFFFFFFFFFFFFF  
FFFF:FFFFFFFFFFFFFFFF:FFFFFFFFFFFFFFFF:FFFFFFFFFFFFFF  
@A00155:342:HHGFNDSXY:1:2429:19009:21104 1:N:0:GAACCTAG+TCCGCATA  
TGGTTTTCTCTTAAACATTGACGCTATATGTTCTTCTTCATCATGTTCAATGCCACGAACTTGGTCC  
TGTGCCTGTACTCTTTTTTGATGTACTGTCTATCCTCTTCATACTGTGAATGTACACTTCCTGATGGC  
+  
FFFFFFFFFFFFFFFFFFFFFFFF:FFFFFFFFFFFFFFFFFFFFFFFF:FFF:FFFFFFFF,F  
FFFF:FFFFFFFFFFFFFFFFFFFFFFFF,FFFFFFFFFFFFFFFFFFFFFFFF  
@A00155:342:HHGFNDSXY:1:2659:12463:4194 2:N:0:GAACCTAG+TCCGCATA  
CTTAAACATTGACGCTATATGTTCTTCTTCATCATGTTCAATGCCACGAACTTGGTCTGTGCCTGT  
ACTCTTTTTTGATGTACTGTCTATCCTCTTCATACTGTGAATGTACACTTCCTGATGGCACCCACTCC  
+  
FFFFFFFFFFFF::FFFFFFFF:FF:FFFFFFFFFFFFFFFFFFFFFFFFFFFFFFFF  
FFFFFFFFFFFFFFFFFFFFFFFFFFFFFFFFFFFFFFFFFFFFFFFFFFFFFFFF  
@A00155:342:HHGFNDSXY:1:2617:31485:14810 2:N:0:GAACCTAG+TCCGCATA  
GGCGCTATATGTTCTTCTTCATCATGTTCAATGCCACGAACTTGGTCTGTGCCTGTACTCTTTTT  
GATGTACTGTCTATCCTCTTCATACTGTGAATGTACACTTCCTGATGGCACCCACTCCCAACGT  
+  
FFFFFFFFFFFFFFFFFFFFFFFFFFFFFFFFFFFFFFFF:FFFFFFFFFFFFFFFF  
FFFFFF:F:F:FFFFFFFFFFFFFFFF:FFFFFFFFFFFFFFFFFFFFFFFF  
@A00155:342:HHGFNDSXY:1:1331:2419:35211 1:N:0:GAACCTAG+TCCGCATA  
GACGCTATATGTTCTTCTTCATCATGTTCAATGCCACGAACTTGGTCTGTGCCTGTACTCTTTTT  
GATGTACTGTCTATCCTCTTCATACTGTGAATGTACACTTCCTGATGGCACCCACTCCCAACGTGAAT  
+  
FF:F,FFF:FFFFFFFF,FFFFFFFF,FFFFFFFF,FFFFFFFF  
FFFFFFFFFFFFFFFFFFFFFFFF:FFFFFFFF:FFFFFFFFFFFFFFFF:F  
@A00155:342:HHGFNDSXY:1:2617:31485:14810 1:N:0:GAACCTAG+TCCGCATA  
TTCTTCATCATGTTCAATGCCACGAACTTGGTCTGTGCCTGTACTCTTTTTTGATGTACTGTCTATC  
CTCTTCATACTGTGAATGTACACTTCCTGATGGCACCCACTCCCAACGTGAATCTAAGTATTTG  
+  
FFFFFFFFFFFFFFFFFFFFFFFF:F:FFFFFFFF:F:FFFFFFFFFFFFFFFF:F:FF  
FFFFFFFFFFFFFFFF:FFFFFFFF:FFFFFFFF:FFF::FFFFF:FFFFF,FFFF  
@A00155:342:HHGFNDSXY:1:1610:25726:16110 2:N:0:GAACCTAG+TCCGCATA  
CACGAACTTGGTCTGTGCCTGTACTCTTTTTTGATGTACTGTCTATCCTCTTCATACTGTGAATGTA  
CACTTCCTGATGGCACCCACTCCCAACGTGAATCTAAGTATTTGTCCAGCCTCATTTTCGGATACTTG  
+  
FFFFFFFFFFFFFFFFFFFFFFFFFFFFFFFFFFFFFFFF:FFFFFFFF  
FFFFFFFFFFFFFFFFFFFFFFFFFFFFFFFFFFFFFFFFFFFFFFFFFFFFFFFF

@A00155:342:HHGFNDSXY:1:1141:7184:7921 2:N:0:GAACCTAG+TCCGCATA  
ACGAACTTGTCCTGTGCCTGTACTCTTTTTTTGATGTACTGTCTATCCTCTTCATACTGTGAATGTAC  
ACTTCCTGATGGCACCCACTCCCAACGTGAATCTAAGTATTTGTCCAGCCTCATTTTTCGGATACTTGT  
+  
F:FFFFFFFFFFFFFFFFFFFFFFFF:F:FFFFFFFF:FFFFFFFFFFFF:FFFFFFFFFFFF,FFFFFFF  
FFFFFFFFFFFFFFFFFFFFFFFFFFFFFFFF:FFFFFFFFFFFFFFFFFFFFFFFFFFFFFFFFFFFFFFFF  
@A00155:342:HHGFNDSXY:1:2624:26657:35164 1:N:0:GAACCTAG+TCCGCATA  
CGAACTTGTCCTGTGCCTGTACTCTTTTTTTGATGTACTGTCTATCCTCTTCATACTGTGAATGTACA  
CTTCCTGATGGCACCCACTCCCAACGTGAATCTAAGTATTTGTCCAGCCTCATTTTTCGGATACTTGT  
+  
FFFFFFFFFFFFFFFFFFFFFFFFFFFFFFFFFFFFFFFFFFFFFFFFFFFFFFFFFFFFFFFFFFFFFFFF  
FFFFFFFFFFFFFFFFFFFFFFFFFFFFFFFFFFFFFFFFFFFFFFFFFFFFFFFFFFFFFFFFFFFFFFFF:  
@A00155:342:HHGFNDSXY:1:1331:2419:35211 2:N:0:GAACCTAG+TCCGCATA  
GTCCTGTGCCTGTACTCTTTTTTTGATGTACTGTCTATCCTCTTCATACTGTGAATGTACACTTCCTGA  
TGGCACCCACTCCCAACGTGAATCTAAGTATTTGTCCAGCCTCATTTTTCGGATACTTGTATCCGTGAT  
+  
FFFFFFFFFFFFFFFFFFFFFFFFFFFFFFFFFFFFFFFFFFFFFFFFFFFFFFFFFFFFFFFFFFFFFFFF  
FFFFFFFFFFFFFFFFFFFFFFFFFFFFFFFFFFFFFFFFFFFFFFFFFFFFFFFFFFFFFFFFFFFFFFFF:  
@A00155:342:HHGFNDSXY:1:1322:18231:14998 1:N:0:GAACCTAG+TCCGCATA  
GTGCCTGTACTCTTTTTTTGATGTACTGTCTATCCTCTTCATACTGTGAATGTACACTTCCTGATGGCA  
CCCACTCCCAACGTGAATCTAAGTATTTGTCCAGCCTCATTTTTCGGATACTTGTATCCGTGATTACC  
+  
FFFFFFFFFFFFFFFFFFFFFFFFFFFFFFFFFFFFFFFFFFFFFFFFFFFFFFFFFFFFFFFFFFFFFFFF  
FFFFFFFFFFFFFFFFFFFFFFFFFFFFFFFFFFFFFFFFFFFFFFFFFFFFFFFFFFFFFFFFFFFFFFFF:  
@A00155:342:HHGFNDSXY:1:1141:7184:7921 1:N:0:GAACCTAG+TCCGCATA  
GTGCCTGTACTCTTTTTTTGATGTACTGTCTATCCTCTTCATACTGTGAATGTACACTTCCTGATGGCA  
CCCACTCCCAACGTGAATCTAAGTATTTGTCCAGCCTCATTTTTCGGATACTTGTATCCGTGATTACC  
+  
FFFFFFFFFFFFFFFFFFFFFFFFFFFFFFFFFFFFFFFFFFFFFFFFFFFFFFFFFFFFFFFFFFFFFFFF  
FFFFFFFFFFFFFFFFFFFFFFFFFFFFFFFFFFFFFFFFFFFFFFFFFFFFFFFFFFFFFFFFFFFFFFFF:  
@A00155:342:HHGFNDSXY:1:2440:26467:3771 1:N:0:GAACCTAG+TCCGCATA  
GTGCCTGTACTCTTTTTTTGATGTACTGTCTATCCTCTTCATACTGTGAATGTACACTTCCTGATGGCA  
CCCACTCCCAACGTGAATCTAAGTATTTGTCCAGCCTCATTTTTCGGATACTTGTATCCGTGATTACC  
+  
F:FFFFFFFFFFFFFFFFFFFFFFFF:F:FFFFFFFFFFFFFFFFFFFFFFFF:FFF:FFF:FFFF:::FFFFFFFFFFFF  
FFFFFFFFFFFFFFFFFFFFFFFFFFFFFFFF:FF:FF,FFFFFFFFFFFF:FFFFF:,FFFFF:F,FFFF:F  
@A00155:342:HHGFNDSXY:1:2429:19009:21104 2:N:0:GAACCTAG+TCCGCATA  
TACTCTTTTTTTGATGTACTGTCTATCCTCTTCATACTGTGAATGTACACTTCCTGATGGCACCCACTC  
CCAACGTGAATCTAAGTATTTGTCCAGCCTCATTTTTCGGATACTTGTATCCGTGATTACCCCCTTCGG  
+  
FFFFFFFF:FFFFFFFF:FFFFFFFFFFFFFFFFFFFFFFFF:FFFFFFFFFFFFFFFFFFFFFFFF,FFFFFFFFFFFFFFFFFFFF  
FFFFFFFFFFFFFFFFFFFFFFFFFFFFFFFFFFFFFFFFFFFFFFFFFFFFFFFFFFFFFFFFFFFFFFFFFFFF  
@A00155:342:HHGFNDSXY:1:1249:12463:14246 2:N:0:GAACCTAG+TCCGCATA  
TTTTGATGTACTGTCTATCCTCTTCATACTGTGAATGTACACTTCCTGATGGCACCCACTCCCAACGT  
GAATCTAAGTATTTGTCCAGCCTCATTTTTCGGATACTTGTATCCGTGATTACCCCCTTCGGAGAATAC  
+  
FFFFFFFFFFFFFFFFFFFFFFFFFFFFFFFFFFFFFFFFFFFFFFFFFFFFFFFFFFFFFFFFFFFFFFFFFFFF  
FFFFFFFFFFFF:FFF:FFFFFFFFFFFFFFFFFFFFFFFFFFFFFFFFFFFFFFFFFFFFFFFFFFFFFFFFFFFF  
@A00155:342:HHGFNDSXY:1:1322:18231:14998 2:N:0:GAACCTAG+TCCGCATA  
TCTATCCTCTTCATACTGTGAATGTACACTTCCTGATGGCACCCACTCCCAACGTGAATCTAAGTATT  
TGTCCAGCCTCATTTTTCGGATACTTGTATCCGTGATTACCCCCTTCGGAGAATACCTTTTTTTGCTTCT  
+  
FFFFFFFFFFFFFFFFFFFFFFFFFFFFFFFFFFFFFFFFFFFFFFFFFFFFFFFFFFFFFFFFFFFFFFFFFFFF  
FFFFFFFFFFFFFFFFFFFFFFFFFFFFFFFFFFFFFFFFFFFFFFFFFFFFFFFFFFFFFFFFFFFFFFFFFFFF:  
@A00155:342:HHGFNDSXY:1:1322:18231:14998 2:N:0:GAACCTAG+TCCGCATA

[illegible]

@A00155:342:HHGFNDSXY:1:2140:29423:3724 1:N:0:GAACCTAG+TCCGCATA  
ATTTGTCCAGCCTCATTTTCGGATACTTGTATCCGTGATTCACCCCTTCCGAGAATACCTTTTTTGCT  
TCTTGGTATACATCTTGCTTTTTTACCTTTATCGCGTCAGGTTTAATCCTGTGCTCTTTCTCTTTCT  
+  
FFFFF:FFFF:F,FFFFFFFF::FFFFFFFFFFFFFF:FFFFF:,FFFFFFFF:FFFFFFFFFFFFFF  
:FFFFFFFFFFFFFFFFFFFFFFFFFFFFFFFF:FFFFFFFFFFFFFFFF:FFFFFFFF:FFFFF  
@A00155:342:HHGFNDSXY:1:2342:10700:11882 1:N:0:GAACCTAG+TCCGCATA  
ATTTGTCCAGCCTCATTTTCGGATACTTGTATCCGTGATTCACCCCTTCCGAGAATACCTTTTTTGCT  
TCTTGGTATACATCTTGCTTTTTTACCTTTATCGCGTCAGGTTTAATCCTGTGCTCTTTCTCTTTCTG  
+  
FFFFFFFFFFFFFFFFFFFFFFFF:FFFFFFFFFFFFFFFFFFFFFFFFFFFFFFFF:FFFF  
FFFFFFFFFFFFFFFF:FFFFF:FFFFFFFFFFFFFF,FFFFFFFFFFFFFFFFFFFFFFFFFFFFFFFF  
@A00155:342:HHGFNDSXY:1:2275:21992:21042 1:N:0:GAACCTAG+TCCGCATA  
TTGTCCAGCCTCATTTTCGGATACTTGTATCCGTGATTCACCCCTTCCGAGAATACCTTTTTTGCTTC  
TTGGTATACATCTTGCTTTTTTACCTTTATCGCGTCAGGTTTAATCCTGTGCTCTTTCTCTTTCTGCC  
+  
FFFFFFFFFFFFFFFFFFFFFFFFFFFFFFFFFFFFFFFFFFFFFFFFFFFFFFFF:FFFFFFFF  
FFFFF,,FFFFFFFFFFFFFFFFFFFFFFFFFFFFFFFFFFFFFFFFFFFFFFFFFFFFFFFFFFFFFFFF  
@A00155:342:HHGFNDSXY:1:1347:2944:34053 1:N:0:GAACCTAG+TCCGCATA  
TTGTCCAGCCTCATTTTCGGATACTTGTATCCGTGATTCACCCCTTCCGAGAATACCTTTTTTGCTTC  
TTGGTATACATCTTGCTTTTTTACCTTTATCGCGTCAGGTTTAATCCTGTGCTCTTTCTCTTTCTGCC  
+  
FFFFFFFFFFFFFFFFFFFFFFFFFFFFFFFFFFFFFFFFFFFFFFFF:FFFFFFFFFFFFFFFF  
FFFFF,FFFFFFFFFFFFFFFF,FFFFFFFFFFFFFFFFFFFFFFFFFFFFFFFF:FFFFF  
@A00155:342:HHGFNDSXY:1:2247:13648:10661 1:N:0:GAACCTAG+TCCGCATA  
CTTGTATCCGTGATTCACCCCTTCCGAGAATACCTTTTTTGCTTCTTGGTATACATCTTGCTTTTTTA  
CCTTTATCGCGTCAGGTTTAATCCTGTGCTCTTTCTCTTTCTGCCAGTTTATGCTCCC  
+  
FFFFFFFFFFFFFFFFFFFFFFFF:FFFFF:FFFFFFFFFFFF:FFFFFFFFFFFFFFFFFFFF::FF  
FFFFFFFFFFFFFFFFFFFFFFFFFFFFFFFFFFFFFFFFFFFFFFFFFFFFFFFFFFFFFFFF  
@A00155:342:HHGFNDSXY:1:2165:1732:5619 2:N:0:GAACCTAG+TCCGCATA  
TTGTATCCGTGATTCACCCCTTCCGAGAATACCTTTTTTGCTTCTTGGTATACATCTTGCTTTTTTAC  
CTTTATCGCGTCAGGTTTAATCCTGTGCTCTTTCTCTTTCTGCCAGTTTATGCTCCCCACACCTCTAT  
+  
:,::F,FF:F::,FFFFFF:FFF:F:F:,FFFFFF:,::F:FF::F::F:FFF,F,::FFFFFFFF  
FF,F,FF:FF:FFFF:FFF:FF:::FFFFFFFF:FFFFFFFF:FF,FF,FFF:,FFFFFF:,F  
@A00155:342:HHGFNDSXY:1:1263:22363:31798 2:N:0:GAACCTAG+TCCGCATA  
TCCGTGATTCACCCCTTCCGAGAATACCTTTTTTGCTTCTTGGTATACATCTTGCTTTTTTACCTTTA  
TCGCGTCAGGTTTAATCCTGTGCTCTTTCTCTTTCTGCCAGTTTATGCTCCCCACACCTCTATTACC  
+  
FFFFFFFFFFFFFFFFFFFFFFFF:F:FFFFFFFFFFFFFF:FFFFFFFFFFFFFFFFFFFFFFFF  
FFFFFFFFFFFFFFFFFFFFFFFFFFFFFFFFFFFFFFFFFFFFFFFFFFFFFFFFFFFFFFFF  
@A00155:342:HHGFNDSXY:1:2247:13648:10661 2:N:0:GAACCTAG+TCCGCATA  
CCTTCCGAGAATACCTTTTTTGCTTCTTGGTATACATCTTGCTTTTTTACCTTTATCGCGTCAGGTTT  
AATCCTGTGCTCTTTCTCTTTCTGCCAGTTTATGCTCCCCACACCTCTATTACCAAGC  
+  
FFFFFFFFFFFFFFFFFFFFFFFFFFFFFFFFFFFFFFFFFFFFFFFFFFFFFFFFFFFFFFFF  
FFFFFFFFFFFFFFFFFFFFFFFFFFFFFFFFFFFFFFFFFFFFFFFFFFFFFFFFFFFFFFFF  
@A00155:342:HHGFNDSXY:1:1476:4218:3568 2:N:0:GAACCTAG+TCCGCATA  
GAATACCTTTTTTGCTTCTTGGTATACATCTTGCTTTTTTACCTTTATCGCGTCAGGTTTAATCCTGT  
GCTCTTTCTCTTTCTGCCAGTTTATGCTCCCCACACCTCTATTACCAAGCACATCATCTCAAACATT  
+  
FFFFFFFFF:FFFFFFFF:FFFFFF:FFFFFF:FFFF:FF:F:FFF:FFFFFFFFFFFF:FFFFFFFF  
:FFFF::FFFFFF:FFFFFFFF,FFFFFFFF:FFFFF,FFFFFFFFFFFF,FFFFFFFFFFFF:F

@A00155:342:HHGFNDSXY:1:2275:21992:21042 2:N:0:GAACCTAG+TCCGCATA  
GAATACCTTTTTGCTTCTTGGTATACATCTTGCTTTTTTACCTTTATCGCGTCAGGTTTAATCCTGT  
GCTCTTTCTCTTTCTGCCAGTTTATGCTCCCCACACCTCTATTACCAAGCACATCATCTCAAACATT  
+  
FFFFFFFFFFFFFF:FFFFFFFFFFFFFFF,FFFFFFFFFFFFFFF,FFFFFFFFFFFFFFF  
FFFFFFFFF,FFFFFFFFFFFFFFF,FFFFFFFFFFFFFFF,FFFFFFFFFFFFFFF  
@A00155:342:HHGFNDSXY:1:1347:2944:34053 2:N:0:GAACCTAG+TCCGCATA  
AATACCTTTTTGCTTCTTGGTATACATCTTGCTTTTTTACCTTTATCGCGTCAGGTTTAATCCTGTG  
CTCTTTCTCTTTCTGCCAGTTTATGCTCCCCACACCTCTATTACCAAGCACATCATCTCAAACATT  
+  
FFF:FF,FF,FFFF,FFFFFFFFF:FFFF,FFFF:FFFFFFFFFFFFFF,FFFFFF:FFFF  
FFFF:FFFFFFFFFFFFFFF:FFFFFFFFFFFFFFF:FFFFFFFFFFFFFFF  
@A00155:342:HHGFNDSXY:1:2263:10863:7185 2:N:0:GAACCTAG+TCCGCATA  
TACATCTTGCTTTTTTACCTTTATCGCGTCAGGTTTAATCCTGTGCTCTTTCTCTTTCTGCCAGTTTA  
TGCTCCCCACACCTCTATTACCAAGCACATCATCTCAAACATTTCTGTCAGATCTAATATCTCCTTG  
+  
FFF:FFF:F:FF,,FFFFFFFFFFFFFFFFFFFFFFFFFFFFFFFF:FFFF:FFF:FFFFFFFFFFFF  
FFFFFFFFF:FFFFFFFFF:FFFFFFFFFFFFFFFFFFFFFFFFFFFFFFFFFFFFFFFFFFFFFFFFF  
@A00155:342:HHGFNDSXY:1:2268:27398:35853 2:N:0:GAACCTAG+TCCGCATA  
GCTTTTTTACCTTTATCGCGTCAGGTTTAATCCTGTGCTCTTTCTATTCTGCCAGTTTATGCTCCCC  
ACACCTCTATTACCAAGCACATCATCTCAAACATTTCTGTCAGATCTAATATCTCCTTGTTA  
+  
FFFF:FFFFFFFFFFFFFFFFF:FFFFFFFFF:FFFFFFFFFFFFFFFFFFFFFFFFFFFFFFFFF:F  
FFFFFFFFFFFFFFFFFFFFFFFFFFFFFFFFFFFFFFFFFFFFFFFFFFFFFFFFFFFFFFFFF  
@A00155:342:HHGFNDSXY:1:1414:23032:7999 2:N:0:GAACCTAG+TCCGCATA  
ACCTTTATCGCGTCAGGTTTAATCCTGTGCTCTTTCTCTTTCTGCCAGTTTATGCTCCCCACACCTCT  
ATTCACCAAGCACATCATCTCAAACATTTCTGTCAGATCTAATATCTCCTTGTTATGCATACTTTTCA  
+  
FFFFFFFFF:FFFFFFFFFFFFFFFFFFFFFFFFFFFFFFFFFFFFFFFFFFFFFFFFF:FFFFFF:FF  
:FFFFFFFFFFFFFFFFF:FFFFFFFFFFFFFFFFF:FFFFFFFFF,FFF:FFFF:,FFFF  
@A00155:342:HHGFNDSXY:1:1335:2501:29183 2:N:0:GAACCTAG+TCCGCATA  
TTATCGCGTCAGGTTTAATCCTGTGCTCTTTCTCTTTCTGCCAGTTTATGCTCCCCACACCTCTATT  
ACCAAGCACATCATCTCAAACATTTCTGTCAGATCTAATATCTCCTTGTTATGCATACTTTTCAATG  
+  
FFFFFFFFFFFFFFFFFFFFFFFFF:FFFFFFFFF:FFFFFFFFFFFFFFFFFFFFFFFFF:FF::F  
FFF:FFFFFFFFFFFFFFFFFFFFFFFFFFFFFFFFFFFFFFFFF:FFF:FFF:FFFFFFFFFFFFF  
@A00155:342:HHGFNDSXY:1:2268:27398:35853 1:N:0:GAACCTAG+TCCGCATA  
TCGCGTCAGGTTTAATCCTGTGCTCTTTCTATTCTGCCAGTTTATGCTCCCCACACCTCTATTACAC  
AAGCACATCATCTCAAACATTTCTGTCAGATCTAATATCTCCTTGTTATGCATACTTTTCAAT  
+  
FFFFFFFFFFFFFFFFFFFFFFFFF:FFFFF,FFFFFFFFFFFFFFFFF  
FFFFFFFFFFFFFFFFFFFFFFFFF::FFFFFFFF:FFFF:FFFFFFFFFFFFFFFFF  
@A00155:342:HHGFNDSXY:1:1356:23918:18114 2:N:0:GAACCTAG+TCCGCATA  
TCTTTCTCTTTCTGCCAGTTTATGCTCCCCACACCTCTATTACCAAGCACATCATCTCAAACATTTCT  
TGTCAGATCTAATATCTCCTTGTTATGCATACTTTTCAATGGTGTGGCTAACTCCTTTAGTCTTCCTG  
+  
FFFFFFFFFFFFFFF:FFFFFFFFFFFFFFFFFFFFFFFFF:FFFFFFFFFFFFFFFFFFFFFFFFF  
FFFFFFFFFFFFF:FFFFFFFFFFFFFFFFFFFFFFFFFFFFFFFFFFFFFFFFFFFFFFFFF  
@A00155:342:HHGFNDSXY:1:2469:20130:2284 1:N:0:GAACCTAG+TCCGCATA  
CTGCCAGTTTATGCTCCCCACACCTCTATTACCAAGCACATCATCTCAAACATTTCTGTCAGATCTA  
ATATCTCCTTGTTATGCATACTTTTCAATGGTGTGGCTAACTCCTTTAGTCTTCCTGCCAACTCGTCC  
+  
FFFFFFFFFFFFF:F:FFFFFFFFFFFFFFFFFFFFFFFFFFFFFFFFF:FFFFFFFFFFFFFFFFF  
FFFFFFFFFFFFF::FFFFFFFF:FFFFFFFF:FFFFFFFFFFFFFFFFFFFFFFFFF

@A00155:342:HHGFNDSXY:1:2658:4300:12195 1:N:0:GAACCTAG+TCCGCATA  
TGCCAGTTTATGCTCCCCACACCTCTATTACCAAGCACATCATCTCAAACATTTCTGTCAGATCTAA  
TATCTCCTTGTTATGCATACTTTTCAATGGTGTGGCTAACTCCTTTAGTCTTCCTGCCAACTCGTCCA  
+  
FFFFFFFFFFFFFFFFFFFFFFFF:FFFFFFFF:FFFFFFFF,FFFFFFFF,FFFFFFFF:FF,,::  
F,:FF,FF:FFFFFF,FFFFFFFFFFFFFFFF: ,FFFFFFFFFFFFFFFF:FFF,FFFFFF,FFFFFF  
@A00155:342:HHGFNDSXY:1:1356:23918:18114 1:N:0:GAACCTAG+TCCGCATA  
GCCAGTTTATGCTCCCCACACCTCTATTACCAAGCACATCATCTCAAACATTTCTGTCAGATCTAAT  
ATCTCCTTGTTATGCATACTTTTCAATGGTGTGGCTAACTCCTTTAGTCTTCCTGCCAACTCGTCCAA  
+  
FFFFFFFFFFFFFFFF:FFF:FFFFFFFFFFFFFFFFFFFFFFFFFFFFFFFFFFFFFFFFFFFFFFFF, F, FFF  
FFFFFF:FFFFFFFFFFFFFFFFFFFFFFFFFFFFFFFFFFFFFFFFFFFFFFFFFFFFFFFFFFFFFFFF  
@A00155:342:HHGFNDSXY:1:1414:23032:7999 1:N:0:GAACCTAG+TCCGCATA  
CCAGTTTATGCTCCCCACACCTCTATTACCAAGCACATCATCTCAAACATTTCTGTCAGATCTAATA  
TCTCCTTGTTATGCATACTTTTCAATGGTGTGGCTAACTCCTTTAGTCTTCCTGCCAACTCGTCCAAA  
+  
FFFFFFFFFFFFFFFFFFFFFFFFFFFFFFFFFFFFFFFFFFFFFFFF:FFFFF,FFFFFFFFFFFF:FFFF  
FFFFFFFFFFFFFFFFFFFFFFFFFFFFFFFFFFFFFFFFFFFFFFFFFFFFFFFFFFFFFFFFFFFFFFFF  
@A00155:342:HHGFNDSXY:1:1634:11939:34914 1:N:0:GAACCTAG+TCCGCATA  
CCCCACACCTCTATTACCAAGCACATCATCTCAAACATTTCTGTCAGATCTAATATCTCCTTGTTAT  
GCATACTTTTCAATGGTGTGGCTAACTCCTTTAGTCTTCCTGCCAACTCGTCCAACTCTCACACTCC  
+  
FFFFFF:FFFFFFFFFFFFFFFFFFFFFFFFFFFFFFFFFFFFFFFF:FFFFFFFFFFFF:F:F,:FFFFFFFF:F  
FFFFFFFFFFFFFFFF:FFFFFFFFF::FFFFFFFFFFFFFFFFFFFFFFFFFFFFFFFFFFFFFFFFFFFF  
@A00155:342:HHGFNDSXY:1:1401:6931:24674 1:N:0:GAACCTAG+TCCGCATA  
CCCACACCTCTATTACCAAGCACATCATCTCAAACATTTCTGTCAGATCTAATATCTCCGTGTTATG  
CATACTTTTCAATGGTGTGGCTAACTCCTTTAGTCTTCCTGCCAACTCGTCCAACTCTCACACTCC  
+  
FFFFF,FFFFFFFFFFFFFFFFFFFFFFFFFFFFFFFF:FFFFF:F::FFFFFFFFF::FF,F,FFFFFF,FFFFFF  
FFFFFFFFFFFFFFFFFFFFFFFFFFFFFFFF:FFFFFFFFFFFFFFFFFFFFFFFFFFFFFFFFFFFFFFFF  
@A00155:342:HHGFNDSXY:1:2315:27742:22639 1:N:0:GAACCTAG+TCCGCATA  
ACATCATCTCAAACATTTCTGTCAGATCTAATATCTCCTTGTTATGCATACTTTTCAATGGTGTGGCT  
AACTCCTTTAGTCTTCCTGCCAACTCGTCCAACTCTCACACTCCCACAGCCTTCTTGATGTGCAGAA  
+  
FFFFFFFFFFFFFFFFFFFFFFFFFFFFFFFF:FFFF:,FFF:FFFFFFFFFFFFFFFFFFFFFFFFFFFFFFFF  
FFFFFFFFFFFFFFFFFFFFFFFFFFFFFFFFFFFFFFFFFFFFFFFFFFFFFFFFFFFFFFFFFFFFFFFF  
@A00155:342:HHGFNDSXY:1:1315:27380:33411 1:N:0:GAACCTAG+TCCGCATA  
ACATCATCTCAAACATTTCTGTCAGATCTAATATCTCCTTGTTATGCATACTTTTCAATGGTGTGGCT  
AACTCCTTTAGTCTTCCTGCCAACTCGTCCAACTCTCACACTCCCACAGCCTTCTTGATGTGCAGAA  
+  
FFFFFFFFFFFFFFFFFFFFFFFFFFFFFFFF,:::F:F:FF:FFFFFFFFFFFFFFFFFFFFFFFFFFFFFFFF,FFFF  
FFFFFF:FFFFFFFFFFFFFFFFFFFFFFFFFFFFFFFFFFFFFFFFFFFFFFFFFFFFFFFFFFFFFFFF,FFFFFF  
@A00155:342:HHGFNDSXY:1:1331:22299:11584 2:N:0:GAACCTAG+TCCGCATA  
ATCATCTCAAACATTTCTGTCAGATCTAATATCTCCTTGTTATGCATACTTTTCAATGGTGTGGCTAA  
CTCCTTTAGTCTTCCTGCCAACTCGTCCAACTCTCACACTCCCACAGCCTTCTTGATGTGCAGAATA  
+  
FFFFFFFFFFFFFFFFFFFFFFFFFFFFFFFF,FFFFFFFFFFFFFFFF: ,FFFFFFFFFFFF:FF:FFFFFFFFFFFF,  
FFF:FFFFFF,FFFFFF,FFFF:FF:FFF,FFFF::FF,:F:FFFFFFFF:FFFFFFFFFFFFFFFF  
@A00155:342:HHGFNDSXY:1:1621:29143:6621 2:N:0:GAACCTAG+TCCGCATA  
ATCATCTCAAACATTTCTGTCAGATCTAATATCTCCTTGTTATGCATACTTTTCAATGGTGTGGCTAA  
CTCCTTTAGTCTTCCTGCCAACTCGTCCAACTCTCACACTCCCACAGCCTTCTTGATGTGCAGAATA  
+  
FF,FF,FF,:F:FF::FFFFFFFFFFFFFFFF:FFFFFFFFF:FFFF,FFF:FFFFFFFFFFFF:FFF:FFF  
FFFFFFFFFFFF,FFF:FFFF,FFFFFFFFFFFFFFFF:FFFFFF:FFF:FFFFFFFFFF,FF,FFFFFF

@A00155:342:HHGFNDSXY:1:1529:26277:12712 2:N:0:GAACCTAG+TCCGCATA  
ATCATCTCACACATTTCTGTCAGATCTAATATCTCCTTGTTATGCATACTTTTCAATGGTGTGGCTAA  
CTCCTTTAGTCTTCTCTGCCAACTCGTCCAAACTCTCACACTCCCACAGCCTTCTTGATGTGCAGAATA  
+  
FFFFFFF,F,FFFF:FFFFFFF:FFFFFFFFFFFFFFFFFFFFFFFFF:FFFFF:FFFFFFF,FFFFFFFFF  
FFFFFFFFFFFFFFFFFFFFFFFFFFFFFFFFFFFFFFFFF:FFFFFFFFFFFFFFFFFFFFFFFFF  
@A00155:342:HHGFNDSXY:1:1634:11939:34914 2:N:0:GAACCTAG+TCCGCATA  
TCAAACATTTCTGTCAGATCTAATATCTCCTTGTTATGCATACTTTTCAATGGTGTGGCTAACTCCTT  
TAGTCTTCCGGCCAACTCGTCCAAACTCTCACACTCCCACAGCCTTCTTGATGTGCAGAATATGTAT  
+  
F,FFFFFFFFFFFFFFF:FF:F,FF:FFFF:FF:FFFF,,FFFFFFFFFFFFFFF:F:FFFFFFFFF,FF  
FFFF:FF::,FFFFFFFFF:FFFFFFFFFFFFFFFFFFFFFFFFF,FFFFF:FFF,FFFFFFFFFFFFFFF  
@A00155:342:HHGFNDSXY:1:2625:5963:33771 1:N:0:GAACCTAG+TCCGCATA  
TCAAACATTTCTGTCAGATCTAATATCTCCTTGTTATGCATACTTTTCAATGGTGTGGCTAACTCCTT  
TAGTCTTCTCTGCCAACTCGTCCAAACTCTCACACTCCCACAGCCTTCTTGATGTGCAGAATATGTATG  
+  
FFFFFFFFFFFFFFFFF:,F::FFFFF,FFFFFFFFFFFFFFFFFFFFFFFFF:FFFF:FFFFF  
FFFFFFFFFFFFFFFFF,FFFFFFFFFFFFFFFFFFFFFFFFF:F,FFFFFF:,FFFFFFFFF  
@A00155:342:HHGFNDSXY:1:2625:5963:33771 2:N:0:GAACCTAG+TCCGCATA  
TGTCAGATCTAATATCTCCTTGTTATGCATACTTTTCAATGGTGTGGCTAACTCCTTTAGTCTTCTCTG  
CCAACTCGTCCAAACTCTCACACTCCCACAGCCTTCTTGATGTGCAGAATATGTATGCCACCTGTGGT  
+  
FFFFFFFFF:FFFFFFFFFFFFFFFFFFFFFFFFF:FFFFFFFFFFFFFFF::FFFFFFFFFFFFF,  
FFFFFFFFFFFFF,FFFFFFFFFFFFFFFFF:FFFF:FFFFFFFFFFFFFFFFFFFFFFFFF:FFF  
@A00155:342:HHGFNDSXY:1:1170:10140:1830 2:N:0:GAACCTAG+TCCGCATA  
CTCCTTGTTATGCATACTTTTCAATGGTGTGGCTAACTCCTTTAGTCTTCTCTGCCAACTCGTCCAAAC  
TCTCACACTCCCACAGCCTTCTTGATGTGCAGAATATGTATGCCACCTGTGGTCTGGCTAGTA  
+  
FFF:FFFFFFFFFFFFFFF:FFFFFFF:FFFFFFFFFFFFFFF:FFFFFFFFFFFFFFFFFFFFFFFFF  
FFFFFFFFFFFFFFFFF:FFFF:FFFFFFFFFFFFFFFFFFFFFFFFF:FFFFFFFFFFFFFFFFF  
@A00155:342:HHGFNDSXY:1:1170:10520:16235 2:N:0:GAACCTAG+TCCGCATA  
CTCCTTGTTATGCATACTTTTCAATGGTGTGGCTAACTCCTTTAGTCTTCTCTGCCAACTCGTCCAAAC  
TCTCACACTCCCACAGCCTTCTTGATGTGCAGAATATGTATGCCACCTGTGGTCTGGCTAGTA  
+  
FFFFFFFFFFFFFFFFF:FFFFFFFFFFFFFFFFFFFFFFFFF:FFFFFFFFFFFFFFFFFFFFFFFFF  
FFFFFFFFFFFFFFFFFFFFFFFFFFFFFFFFFFFFFFFFF:FFFFFFFFFFFFFFFFF  
@A00155:342:HHGFNDSXY:1:2469:20130:2284 2:N:0:GAACCTAG+TCCGCATA  
TCCTTGTTATGCATACTTTTCAATGGTGTGGCTAACTCCTTTAGTCTTCTCTGCCAACTCGTCCAAACT  
CTCACACTCCCACAGCCTTCTTGATGTGCAGAATATGTATGCCACCTGTGGTCTGGCTAGTAGCGCGT  
+  
FFFFFFFFFFFFFFFFFFFFFFFFFFFFFFFFF:FFFFFFFFFFFFFFFFFFFFFFFFF  
FFFFFFFFFFFFFFFFFFFFFFFFFFFFFFFFFFFFFFFFF:FFFFFFFFFFFFF  
@A00155:342:HHGFNDSXY:1:1233:19271:24878 1:N:0:GAACCTAG+TCCGCATA  
TGTTATGCATACTTTTCAATGGTGTGGCTAACTCCTTTAGTCTTCTCTGCCAACTCGTCCAAACTCTCA  
CACTCCCACAGCCTTCTTGATGTGCAGAATATGTATGCCACCTGTGGTCTGGCTAGTAGCGCGT  
+  
FFFFFFFFFFFFFFFFFFFFFFFFFFFFFFFFF:FFFFFFFFFFFFFFFFFFFFFFFFF  
FFFFFFFFFFFFFFFFFFFFFFFFFFFFFFFFFFFFFFFFF:FFFFFFFFFFFFF  
@A00155:342:HHGFNDSXY:1:1233:19271:24878 2:N:0:GAACCTAG+TCCGCATA  
TATGCATACTTTTCAATGGTGTGGCTAACTCCTTTAGTCTTCTCTGCCAACTCGTCCAAACTCTCACAC  
TCCCACAGCCTTCTTGATGTGCAGAATATGTATGCCACCTGTGGTCTGGCTAGTAGCGCGTACATCAT  
+  
FFFFFFFFFFFFFFFFFFFFFFFFFFFFFFFFF:FFFFFFFFFFFFFFFFFFFFFFFFF  
FFFFFFFFFFFFFFFFFFFFFFFFFFFFFFFFFFFFFFFFF:FFFFFFFFFFFFF  
@A00155:342:HHGFNDSXY:1:1233:19271:24878 2:N:0:GAACCTAG+TCCGCATA  
TATGCATACTTTTCAATGGTGTGGCTAACTCCTTTAGTCTTCTCTGCCAACTCGTCCAAACTCTCACAC  
TCCCACAGCCTTCTTGATGTGCAGAATATGTATGCCACCTGTGGTCTGGCTAGTAGCGCGTACATCAT  
+  
FFFFFFFFFFFFFFFFFFFFFFFFFFFFFFFFF:FFFFFFFFFFFFFFFFFFFFFFFFF  
FFFFFFFFFFFFFFFFFFFFFFFFFFFFFFFFFFFFFFFFF:FFFFFFFFFFFFF

@A00155:342:HHGFNDSXY:1:1365:30101:32456 2:N:0:GAACCTAG+TCCGCATA  
ATGCATACTTTTCAATGGTGTGGCTAACTCCTTTAGTCTTCCTGCCAACTCGTCCAAACTCTCACACT  
CCCACAGCCTTCTTGATGTGCAGAATATGTATGCCACCTGTGGTCTGGCTAGTAGCGCGTACATCATG  
+  
FFFFFFFF:FFFF:FFFFFFFFFFFFFFFFFFFFFFFFFFFFFFFFFFFFFFFFFFFFFFFFFFFFFFFFF  
FFFFFFFF:FFFFFFFFFFFFFFFFFFFFFFFFFFFFFFFFFFFFFFFFFFFFFFFFFFFFFFFFFFFFFFF  
@A00155:342:HHGFNDSXY:1:1170:10140:1830 1:N:0:GAACCTAG+TCCGCATA  
AATGGTGTGGCTAACTCCTTTAGTCTTCCTGCCAACTCGTCCAAACTCTCACACTCCCACAGCCTTCT  
TGATGTGCAGAATATGTATGCCACCTGTGGTCTGGCTAGTAGCGCGTACATCATGC  
+  
F:FFFFFFFFFFFFFFFFFFFFFFFFFFFFFFFFFFFFFFFFFFFFFFFFFFFFFFFFFFFFFFFFFFFFF  
FFFFFFFFFFFFFFFFFFFFFFFFFFFFFFFFFFFFFFFFFFFFFFFFFFFFFFFFFFFFFFFFFFFFF:  
@A00155:342:HHGFNDSXY:1:1170:10520:16235 1:N:0:GAACCTAG+TCCGCATA  
AATGGTGTGGCTAACTCCTTTAGTCTTCCTGCCAACTCGTCCAAACTCTCACACTCCCACAGCCTTCT  
TGATGTGCAGAATATGTATGCCACCTGTGGTCTGGCTAGTAGCGCGTACATCATGC  
+  
FFFFFFFFFFFFFFFFFFFFFFFFFFFFFFFFFFFFFFFFFFFFFFFFFFFFFFFFFFFFFFFFFFFFF  
FFFFFFFFFFFFFFFFFFFFFFFFFFFFFFFFFFFFFFFFFFFFFFFFFFFFFFFFFFFFFFFFFFFFF:  
@A00155:342:HHGFNDSXY:1:2315:27742:22639 2:N:0:GAACCTAG+TCCGCATA  
AATGGTGTGGCTAACTCCTTTAGTCTTCCTGCCAACTCGTCCAAACTCTCACACTCCCACAGCCTTCT  
TGATGTGCAGAATATGTATGCCACCTGTGGTCTGGCTAGTAGCGCGTACATCATGCAAGTTGCCACAG  
+  
FFFFFFFFFFFFFFFFFFFF:FFFFFFFFFFFFFFFFFFFFFFFFFFFFFFFFFFFFFFFFFFFFFFFFFFFFF  
FFFFFFFFFFFFFFFFFFFFFFFFFFFFFFFFFFFFFFFFFFFFFFFFFFFFFFFFFFFFFFFFFFFFF:  
@A00155:342:HHGFNDSXY:1:1315:27380:33411 2:N:0:GAACCTAG+TCCGCATA  
AATGGTGTGGCTAACTCCTTTAGTCTTCCTGCCAACTCGTCCAAACTCTCACACTCCCACAGCCTTCT  
TGATGTGCAGAATATGTATGCCACCTGTGGTCTGGCTAGTAGCGCGTACATCATGCAAGTTGCCACAG  
+  
FFFFFFFFFFFFFFFFFFFFFFFFFFFF:FFFF:FFFF:FFFFFFFFFFFFFFFFFFFFFFFFFFFFFFFFF  
:FFFFFFFFFFFFFFFFFFFFFFFFFFFFFFFFFFFFFFFFFFFFFFFFFFFFFFFFFFFFFFFFFFFFF:  
@A00155:342:HHGFNDSXY:1:1365:30101:32456 1:N:0:GAACCTAG+TCCGCATA  
TGGTGTGGCTAACTCCTTTAGTCTTCCTGCCAACTCGTCCAAACTCTCACACTCCCACAGCCTTCTTG  
ATGTGCAGAATATGTATGCCACCTGTGGTCTGGCTAGTAGCGCGTACATCATGCAAGTTGCCACAGCA  
+  
FFFFFFF:F:FFFFFFFFF:FFFFFFFFFFFFFFFFFFFFFFFFFFFFF:FFFFFFFFFFFFFFFFFFFFF  
FFF:FFFF::F:FFFFFFFFFFFFFFFFFFFF:FFF::F:FFFFFFFFFFFFFFFFFFFFFFFFFFFFF  
@A00155:342:HHGFNDSXY:1:2658:4300:12195 2:N:0:GAACCTAG+TCCGCATA  
AACTCCTTTAGTCTTCCTGCCAACTCGTCCAAACTCTCACACTCCCACAGCCTTCTTGATGTGCAGAA  
TATGTATGCCACCTGTGGTCTGGCTAGTAGCGGTACATCATGCAAGTTGCCACAGCAGCCTCCGTTA  
+  
FFFFFFFF,FFFF,FFFFFFFFFFFFFFFF,FFFFFFFFFFFFFFFF:F:FFFF:FFFFFFFFFFFF:FFFFF  
FFFFFFFFFFFFFFFFFFFFFFFFFFFFFFFFFFFFFFFFFFFFFFFFFFFFFFFFFFFFFFFFFFFFF:  
@A00155:342:HHGFNDSXY:1:2446:22064:7169 1:N:0:GAACCTAG+TCCGCATA  
GTCTTCCTGCCAACTCGTCCAAACTCTCACACTCCCACAGCCTTCTTGATGTGCAGAATATGTATGCC  
ACCTGTGGTCTGGCTAGTAGCGGTACATCATGCAAGTTGCCACAGCAGCCTCCGTTATACCTCTCAT  
+  
FFFFFFFFFFFFFFFFFFFFFFFFFFFF:FFFFFFFFFFFFFFFFFFFFFFFFFFFFFFFFFFFFFFFFFFFFF:FFFF  
FFFFFFFFFFFFFFFFFFFF:FFFFFFFFFFFFFFFFFFFFFFFFFFFFFFFFFFFFFFFFFFFFFFFFFFFFF:  
@A00155:342:HHGFNDSXY:1:1443:5963:20776 2:N:0:GAACCTAG+TCCGCATA  
CGTCCAAACTCTCACACTCCCACAGCCTTCTTGATGTGCAGAATATGTATGCCACCTGTGGTCTGGCT  
AGTAGCGGTACATCATGCAAGTTGCCACAGCAGCCTCCGTTATACCTCTCATTCTTCTCATCTCCTT  
+  
:FFFFFFFFFFFFFFFFFFFFFFFFFFFFFFFFFFFF:FFFFFFFFF,FFFFFF,FFFFFFFFFFFFFFFFFFFFF  
FFFFFFFFFFFFFFFFFFFFFFFFFFFFFFFFFFFFFFFFFFFFFFFFFFFFFFFFFFFFFFFFFFFFF:  
@A00155:342:HHGFNDSXY:1:1443:5963:20776 2:N:0:GAACCTAG+TCCGCATA







[illegible]

@A00155:342:HHGFNDSXY:1:2223:17852:4131 1:N:0:GAACCTAG+TCCGCATA  
AATCTCCTCGGGCCGATAGTGC GTGTGATGTTCTGTGGACACGCTTGACCTCTCAAATTCACCTGATT  
TAGGTGGGTCTACGTTGTGTGCTCTGGTTATTCTTTCCCTCTCCACTCCGAACCTCCTCCTCAGGTAC  
+  
FFFFFFFFFFFFFF:FFFFFFFFFFFFFFFFFFFFFFFFFFFFFFFFFFFFFFFFFFFFFFFFFFFFFFFFFFFFFFFF  
FF:FFFFFFFFFFFFFFFFFFFFFFFFFFFFFFFFFFFFFFFFFFFFFFFFFFFFFFFFFFFFFFFF,FFFFFFFFFFFFF  
@A00155:342:HHGFNDSXY:1:1604:16694:32847 1:N:0:GAACCTAG+TCCGCATA  
AATCTCCTCGGGCCGATAGTGC GTGTGATGTTCTGTGGACACGCTTGACCTCTCAAATTCACCTGATT  
TAGGTGGGTCTACGTTGTGTGCTCTGGTTATTCTTTCCCTCTCCACTCCGAACCTCCTCCTCAGGTAC  
+  
FFFFFF:FFFFFFFF,FFFFFFFFFFFFFFFFFFFFFFFFFFFFFFFFFFFFFFFFFFFFFFFFFFFFFFFFFFFF:F  
FFFFFFFFFFFFFF:FFFFFFFFFFFFFFFFFFFFFFFFFFFFFFFFFFFFFFFFFFFFFFFFFFFFFFFFFFFF:F  
@A00155:342:HHGFNDSXY:1:1131:14931:24032 2:N:0:GAACCTAG+TCCGCATA  
GCTCCTCGGGCCGATAGTGC GTGTGATGTTCTGTGGACACGCTTGACCTCTCAAATTCACCTGATT  
GGTGGGTCTACGTTGTGTGCTCTGGTTATTCTTTCCCTCTCCACTCCGAACCTCCTCCTCAGGTACC  
+  
FFFFFFFFFFFFFF,FFFFFFFFFFFFFFFFFFFFFFFFFFFFFFFFFFFFFFFFFFFFFFFFFFFFFFFFFFFFF  
FFFFFFFFFFFFFFFFFFFFFFFFFFFFFFFFFFFFFFFFFFFFFFFFFFFFFFFFFFFF,FFFFFFFFFFFFF  
@A00155:342:HHGFNDSXY:1:1330:15718:24643 1:N:0:GAACCTAG+TCCGCATA  
TCTCCTCGGGCCGATAGTGC GTGTGATGTTCTGTGGACACGCTTGACCTCTCAAATTCACCTGATT  
GGTGGGTCTACGTTGTGTGCTCTGGTTATTCTTTCCCTCTCCACTCCGAACCTCCTCCTCAGGTACCT  
+  
FFFFFFFFFFFFFFFFFFFFFFFFFFFFFFFFFFFFFFFFFFFFFFFFFFFFFFFFFFFFFFFFFFFFFFFFFFFFF  
FFFFFFFFFFFFFFFFFFFFFFFFFFFFFFFFFFFFFFFFFFFFFFFFFFFFFFFFFFFFF  
@A00155:342:HHGFNDSXY:1:2610:14995:7232 1:N:0:GAACCTAG+TCCGCATA  
TCTCCTCGGGCCGATAGTGC GTGTGATGTTCTGTGGACACGCTTGACCTCTCAAATTCACCTGATT  
GGTGGGTCTACGTTGTGTGCTCTGGTTATTCTTTCCCTCTCCACTCCGAACCTCCTCCTCAGGTACCT  
+  
FFFFFFFFFFFFFFFFFFFFFFFFFFFFFFFFFFFFFFFFFFFFFFFFFFFFFFFFFFFFFFFFFFFFFFFFFFFFF  
FFFFFFFFFFFFFFFFFFFFFFFFFFFFFFFFFFFFFFFFFFFFFFFFFFFFFFFFFFFF:FFFFFFF  
@A00155:342:HHGFNDSXY:1:1149:27091:33473 2:N:0:GAACCTAG+TCCGCATA  
GGCCGATAGTGC GTGTGATGTTCTGTGGACACGCTTGACCTCTCAAATTCACCTGATT  
TACGTTGTGTGCTCTGGTTATTCTTTCCCTCTCCACTCCGAACCTCCTCCTCAGGTACCTAGCTCCAT  
+  
FFFFFF:FFFFFFFFFFFFFF:FFFFFFFFFFFFFFFFFFFFFFFFFFFFFFFFFFFFFFFFFFFFFFFFFFFFF  
FFFFFFFFFFFFFFFFFFFFFFFFFFFFFFFFFFFFFFFFFFFFFFFFFFFFFFFFFFFFF  
@A00155:342:HHGFNDSXY:1:1330:15718:24643 2:N:0:GAACCTAG+TCCGCATA  
CCGATAGTGC GTGTGATGTTCTGTGGACACGCTTGACCTCTCAAATTCACCTGATT  
CGTTGTGTGCTCTGGTTATTCTTTCCCTCTCCACTCCGAACCTCCTCCTCAGGTACCTAGCTCCATTA  
+  
FFFF:FFFFFFFFFFFFFFFFFFFFFFFFFFFFFFFFFFFFFFFFFFFFFFFFFFFFFFFFFFFFF:FFF:FFFFF  
FFFFFFFFFFFFFFFFFFFFFFFFFFFFFFFFFFFFFFFFFFFFFFFFFFFFF:FFFFFFFFFFFFFFFFFFFFF  
@A00155:342:HHGFNDSXY:1:1575:28040:22592 2:N:0:GAACCTAG+TCCGCATA  
CGATAGTGC GTGTGATGTTCTGTGGACACGCTTGACCTCTCAAATTCACCTGATT  
GTTGTGTGCTCTGGTTATTCTTTCCCTCTCCACTCCGAACCTCCTCCTCAGGTACCTAGCTCCATTAA  
+  
FFFFFFFFFFFFFFFFFFFFFFFFFFFFFFFFFFFFFFFFFFFFFFFFFFFFFFFFFFFFFFFFFFFFFFFFFFFFF  
FFFFFFFFFFFFFFFFFFFFFFFFFFFF:FFFFFFFFFFFFFFFFFFFFFFFFFFFFFFFFFFFFFFFFFFFFF  
@A00155:342:HHGFNDSXY:1:1649:17309:28150 2:N:0:GAACCTAG+TCCGCATA  
CGATAGTGC GTGTGATGTTCTGTGGACACGCTTGACCTCTCAAATTCACCTGATT  
GTTGTGTGCTCTGGTTATTCTTTCCCTCTCCACTCCGAACCTCCTCCTCAGGTACCTAGCTCCATTAA  
+  
FFF:FFFFFFFFFFFFFFFFFFFFFFFFFFFFFFFFFFFFFFFFFFFFFFFFFFFFFFFFFFFFF  
FFFFF:FFFFFFFFFFFFFFFFFFFFFFFFFFFFFFFFFFFFFFFFFFFFFFFFFFFFF

[illegible]

[illegible]

```
@A00155:342:HHGFNDSXY:1:1364:19018:1830 1:N:0:GAACCTAG+TCCGCATA  
TTTAGGTGGGCTACGTTGTGTGCTCTGGTTATTCTTTCCCTCTCCAATCCTCGACTCCGAACCTCCTCCTCAGGT  
ACCTAGCTCCATTAAAATCTGAAAAATCGTATTGATCAACCAGGCTGTACATTGCAGACATCGCCCTC  
+  
FFFFFFF:FFFFFFFFFFFFFFFFFFFFFFFFFFFFF:FFFFFFFFFFFFFFFFFFFFFFFFFFFFFFFFF  
FFFFFFFFFFFFF:FFFFFFFFFFFFFFFFFFFFFFFFFFFFFFFFFFFFFFFFFFFFFFFFFFFFF:F:FFF  
@A00155:342:HHGFNDSXY:1:1169:2826:15092 2:N:0:GAACCTAG+TCCGCATA  
GGTGGGCTACGTTGTGTGCTCTGGTTATTCTTTCCCTCTCCAATCCTCGACTCCGAACCTCCTCCTCAGGTACCT  
AGCTCCATTAAAATCTGAAAAATCGTATTGATCAACCAGGCTGTACATTGCAGACATCGCCCTCCTGA  
+  
FFFF:FFFFFFFFFFFFFFFFFFFFFFFFFFFF,FFFFFFFFFFFFFFFFFFFFFFFFFFFFFFFFFFFFFFFF  
FFFFFFFFFFFFFFFFFFFFFFFFFFFFFFFFFFFFFFFF:FFFFFFFFFF:FF,FFFFFFFFFFFFFFFFFFFFFFFF  
@A00155:342:HHGFNDSXY:1:2223:17852:4131 2:N:0:GAACCTAG+TCCGCATA  
GTGGGCTACGTTGTGTGCTCTGGTTATTCTTTCCCTCTCCAATCCTCGACTCCGAACCTCCTCCTCAGGTACCTA  
GCTCCATTAAAATCTGAAAAATCGTATTGATCAACCAGGCTGTACATTGCAGACATCGCCCTCCTGA  
+  
FFF:FFFF,FFFFFFFFFFFFFFFFFFFFFFFFFFFFFFFFFFFFFFFFFFFFFFFFFFFFFFFFFFFFF:FFFFFFFFFF  
FFFFFFFFFFFFFFFFFFFFFFFFFFFFFFFFFFFFFFFFFFFFFFFFFFFFFFFFFFFFFFFFFFFFFFFFF  
@A00155:342:HHGFNDSXY:1:2134:29234:28040 2:N:0:GAACCTAG+TCCGCATA  
GCTCTGGTTATTCTTTCCCTCTCCAATCCTCGACTCCGAACCTCCTCCTCAGGTACCTAGCTCCATTAAAATCTGA  
AAAATCGTATTGATCAACCAGGCTGTACATTGCAGACATCGCCCTCCTGACTGACGCTGGCAGCGTC  
+  
FFFFFFFFFFFFFFFFFFFFFFFFFFFF:FFFFFFFFFFFFFFFFFFFFFFFFFFFFFFFFFFFFFFFF,FFFFFFF,FFFFFFFFF  
:F:FFFFF,FFFFFFFFFFFFFFFFFFFFFFFFFFFFFFFFFFFFFFFFFFFFFFFFFFFFFFFFFFFFFFFFFFFFF  
@A00155:342:HHGFNDSXY:1:1565:19904:7623 2:N:0:GAACCTAG+TCCGCATA  
GCTCTGGTTATTCTTTCCCTCTCCAATCCTCGACTCCGAACCTCCTCCTCAGGTACCTAGCTCCATTAAAATCTGA  
AAAATCGTATTGATCAACCAGGCTGTACATTGCAGACATCGCCCTCCTGACTGACGCTGGCAGCGTC  
+  
F:FFFFFFFFFFFF:FFFF:FFFFFFFFFFFFFFFFFFFFFFFFFFFFFFFFFFFF,FFFFFF:FFFFFFFFFFFFFFFFF  
FFFFFFFFFFFFFFFFFFFFFFFFFFFFFFFFFFFF,FFFFFFFFFFFFFFFFFFFFFFFFFFFF:FFFFFFFFFFFFFFFFFFFFF  
@A00155:342:HHGFNDSXY:1:1628:11053:35790 2:N:0:GAACCTAG+TCCGCATA  
GGTTATTCTTTCCCTCTCCAATCCTCGACTCCGAACCTCCTCCTCAGGTACCTAGCTCCATTAAAATCTGAAAAAT  
CGTATTGATCAACCAGGCTGTACATTGCAGACATCGCCCTCCTGACTGACGCTGGCAGCGTCCTCGCG  
+  
FFFFFFFFFFFFFFFFFFFFFFFFFFFFFFFFFFFFFFFFFFFFFFFFFFFFFFFFFFFFFFFFFFFFFFFFFFFFF  
FF:F:FFFFFFFFFFFFFFFFFFFFF,FFFFFFF:FFFFFFFFFFFFFFFFFFFFFFFFFFFFFFFFFFFFF  
@A00155:342:HHGFNDSXY:1:1450:12111:7059 2:N:0:GAACCTAG+TCCGCATA  
GTTATTCTTTCCCTCTCCAATCCTCGACTCCGAACCTCCTCCTCAGGTACCTAGCTCCATTAAAATCTGAAAAATC  
GTATTGATCAACCAGGCTGTACATTGCAGACATCGCCCTCCTGACTGACGCTGGCAGCGTCCTCGCG  
+  
FFFFFFF:FFFFFFF:FFF:FF:FFFFFFFFF:FFFFFFFFFFFF:FFFFFFF: :FFFFFFFFFFFFFFFFFFFFF:  
FFFFFFFFFFFFFFFFFFFFFFFFFFFFFFFFFFFFFFFFFFFFFFFFFFFFFFFFFFFFFFFFFFFFFFFFFFFFF  
@A00155:342:HHGFNDSXY:1:1209:30906:18443 1:N:0:GAACCTAG+TCCGCATA  
CTCTCCAATCCTCGACTCCGAACCTCCTCCTCAGGTACCTAGCTCCATTAAAATCTGAAAAATCGTATTGATCAAC  
CAGGCTGTACATTGCAGACATCGCCCTCCTGACTGACGCTGGCAGCGTCCTCGCGTCGGTTCGCGTG  
+  
FFFFFFFFFFFFFFFFF:FFFFFFFFFFFFFFFFFFFFFFFFFFFFFFFFFFFFFFFFFFFFFFFFFFFFF:FFFFFFFFFFFF  
FFFFFFFFFFFFFFFFFFFFFFFFFFFFFFFFFFFFFFFFFFFFFFFFFFFFFFFFFFFFFFFFFFFFFFFFFFFFF  
@A00155:342:HHGFNDSXY:1:1504:15691:7560 1:N:0:GAACCTAG+TCCGCATA  
CTCTCCAATCCTCGAGCTCCTCCTCAGGTACCTAGCTCCATTAAAATCTGAAAAATCGTATTGATCAAC  
CAGGCTGTACATTGCAGACATCGCCCTCCTGACTGACGCTGGCAGCGTCCTCGCGTCGGTTCGCGTG
```

@A00155:342:HHGFNDSXY:1:1554:27697:19680 1:N:0:GAACCTAG+TCCGCATA  
TCTCCACTCCGAACCTCCTCCTCAGGTACCTAGCTCCATTAAAATCTGAAAAATCGTATTGATCAACC  
AGGCTGTACATTGCAGACATCGCCCTCCTGACTGACGCTGGCAGCGTCCTCGCGTCGGTTCGCGTGTT  
+  
FFFFFFFFFFFFFF:FFFFFFFFFFFFFFFFFFFFFFFFFFFFFFFFFFFFFFFFFFFFFFFFFFFFFFFFFFFFFFFF  
FFFFFFFFFFFFFFFFFFFFFFFFFFFFFFFFFFFFFFFFFFFFFFFFFFFFFFFFFFFFFFFFFFFFFFFFFFFFFFFF  
@A00155:342:HHGFNDSXY:1:2372:27887:12211 1:N:0:GAACCTAG+TCCGCATA  
TCCACTCCGAACCTCCTCCTCAGGTACCTAGCTCCATTAAAATCTGAAAAATCGTATTGATCAACCAG  
GCTGTACATTGCAGACATCGCCCTCCTGACTGACGCTGGCAGCGTCCTCGCGTCGGTTCGCGTGTTAA  
+  
FFF:FFFF,FF:FFFFFFFF:FFF:FFFFFFFFFFFFFFFFFFFFFFFF:FFFFFFFFFFFF:::,F,FFFF:FF  
FFFF:FFFFFFFF:FFF,FF,FF,FFF:FFFFFFFFFFFFFFFF:FF,FF,FFF:FFFF,FF:FFFF,F,F  
@A00155:342:HHGFNDSXY:1:1209:30906:18443 2:N:0:GAACCTAG+TCCGCATA  
TCCGAACCTCCTCCTCAGGTACCTAGCTCCATTAAAATCTGAAAAATCGTATTGATCAACCAGGCTGT  
ACATTGCAGACATCGCCCTCCTGACTGACGCTGGCAGCGTCCTCGCGTCGGTTCGCGTGTTAACGTAG  
+  
FFFFFFFFFFFFFFFFFFFFFFFFFFFFFFFFFFFFFFFFFFFFFFFFFFFFFFFFFFFFFFFFFFFFFFFFFFFFFFFF  
FFFFFFFFFFFFFFFFFFFFFFFFFFFFFFFFFFFFFFFFFFFFFFFFFFFFFFFFFFFFFFFFFFFFFFFFFFFFFFFF  
@A00155:342:HHGFNDSXY:1:1554:27697:19680 2:N:0:GAACCTAG+TCCGCATA  
AACCTCCTCCTCAGGTACCTAGCTCCATTAAAATCTGAAAAATCGTATTGATCAACCAGGCTGTACAT  
TGCAGACATCGCCCTCCTGACTGACGCTGGCAGCGTCCTCGCGTCGGTTCGCGTGTTAACGTAGTACA  
+  
FFFFF:FFFFFFFFFFFFFFFFFFFFFFFFFFFFFFFFFFFFFFFFFFFFFFFF:FFFFFFFFFFFFFFFFFFFF,FFFF  
FFFFFFFFFFFFFFFFFFFFFFFFFFFFFFFFFFFFFFFFFFFFFFFFFFFFFFFFFFFFFFFFFFFFFFFFFFFFFFFF  
@A00155:342:HHGFNDSXY:1:2323:17345:10864 2:N:0:GAACCTAG+TCCGCATA  
ACCTCCTCCTCAGGTACCTAGCTCCATTAAAATCTGAAAAATCGTATTGATCAACCAGGCTGTACATT  
GCAGACATCGCCCTCCTGACTGACGCTGGCAGCGTCCTCGCGTCGGTTCGCGTGTTAACGTAGTACA  
+  
FFFFFFFFFFFF:FF,FFFFFFFFFFFFFFFFFFFFFFFF:FFFFFFFFFFFFFFFFFFFFFFFFFFFFFFFFFFFFF:  
FF:FFFFFFFFFFFFFFFFFFFFFFFFFFFFFFFF:FFF:FFFFFFFFFFFFFFFFFFFFFFFFFFFFFFFFFFFFF  
@A00155:342:HHGFNDSXY:1:2323:17345:10864 1:N:0:GAACCTAG+TCCGCATA  
CCTCCTCAGGTACCTAGCTCCATTAAAATCTGAAAAATCGTATTGATCAACCAGGCTGTACATTGCAG  
ACATCGCCCTCCTGACTGACGCTGGCAGCGTCCTCGCGTCGGTTCGCGTGTTAACGTAGTACAACCAA  
+  
FFFFFFFFFFFF:FFFFFFFFFFFFFFFFFFFFFFFFFFFFFFFFFFFFFFFFFFFFFFFFFFFFFFFFFFFFFFFFFFFF  
FFFFFFFFFFFFFFFFFFFFFFFFFFFFFFFFFFFF,FFFFFFFFFFFFFFFFFFFFFFFFFFFFFFFFFFFFFFFFFFFF  
@A00155:342:HHGFNDSXY:1:2521:32949:10426 2:N:0:GAACCTAG+TCCGCATA  
CTCAGGTACCTAGCTCCATTAAAATCTGAAAAATCGTATTGATCAACCAGGCTGTACATTGCAGACAT  
CGCCCTCCTGACTGACGCTGGCAGCGTCCTCGCGTCGGTTCGCGTGTTAACGTAGTACA  
+  
:FFFFFFFFFFFFFFFFFFFFFFFFFFFF,FFFF,FFF:FFF:FFFFFFFF:FFFFFFFFFFFFFFFFFFFF,F:FFF  
F,:FFFF:FFFFFF:FF:F,FFF:FFF:FFF:F:FFFFFFFF:FFF:FFFFFF,FF:,  
@A00155:342:HHGFNDSXY:1:1526:31665:24267 2:N:0:GAACCTAG+TCCGCATA  
TCCATTAAAATCTGAAAAATCGTATTGATCAACCAGGCTGTACATTGCAGACATCGCCCTCCTGACTG  
ACGCTGGCAGCGTCCTCGCGTCGGTTCGCGTGTTAACGTAGTACAACCAAGCGTCCTCACACCTCACT  
+  
FFFFFFF:FFFFFFFFFFFFFFFFFFFFFFFFFFFFFFFFFFFFFFFFFFFFFFFF:FFFFFFFFFFFFFFFFFFFFF  
FFFFFFFFFFFFFFFFFFFFFFFFFFFFFFFF:FFFFFFFFFFFFFF:FFFFFFFFFFFFFFFFFFFFFFFFFFFF,FF  
@A00155:342:HHGFNDSXY:1:2521:32949:10426 1:N:0:GAACCTAG+TCCGCATA  
CCATTAAAATCTGAAAAATCGTATTGATCAACCAGGCTGTACATTGCAGACATCGCCCTCCTGACTGA  
CGCTGGCAGCGTCCTCGCGTCGGTTCGCGTGTTAACGTAGTACAACCAAGCGTCCTCAC  
+  
FFFFF:FFFFFFFFFFFFFFFFFFFFFFFFFFFFFFFFFFFFFFFFFFFFFFFF:FFFFFFFFFFFFFFFFFFFFF  
FFFFFFFFFFFF:FFFFFFFFFFFFFFFFFFFFFFFFFFFFFFFFFFFFFFFF:FFFFFFF,F:FFF



[illegible]

@A00155:342:HHGFNDSXY:1:1543:13801:9079 2:N:0:GAACCTAG+TCCGCATA  
AATCGTATTGATCAACCAGGCTGTACATTGCAGACATCGCCCTCCTGACTGACGCTGGCAGCGTCCTC  
CGCTCGGTTTCGCGTGTTAACGTAGTACAACCAAGCGTCCTCACACCTCACTATTGTACAATATACCAC  
+  
FFF:FFFFFFFFFFFFFFFFFFFFFFFFFFFFFFFFFFFFFFFFFFFFFFFFFFFFFFFFFFFFFFFFFFFFFFFF  
F:FFFFFFFFFFFFFFFFFFFFFFFFFFFFFFFFFFFFFFFFFFFFFFFFFFFFFFFFFFFFFFFFFFFFFFFF  
@A00155:342:HHGFNDSXY:1:1604:16694:32847 2:N:0:GAACCTAG+TCCGCATA  
GATCAACCAGGCTGTACATTGCAGACATCGCCCTCCTGACTGACGCTGGCAGCGTCCTCGCGTCGGTT  
CGCGTGTTAACGTAGTACAACCAAGCGTCCTCACACCTCACTATTGTACAATATACCACGTCTTTTCC  
+  
FFFFFFFFFFFFFFFFFFFFFFFFFFFFFFFFFFFFFFFFFFFFFFFFFFFFFFFFFFFFFFFFFFFFFFFF  
FFFFFFFFFFFFFFFFFFFFFFFFFFFFFFFFFFFFFFFFFFFFFFFFFFFFFFFFFFFFFFFFFFFFFFFF  
@A00155:342:HHGFNDSXY:1:2307:13431:11757 1:N:0:GAACCTAG+TCCGCATA  
CAGGCTGTACATTGCAGACATCGCCCTCCTGACTGACGCTGGCAGCGTCCTCGCGTCGGTTTCGCGTGT  
TAACGTAGTACAACCAAGCGTCCTCACACCTCACTATTGTACAATATACCACGTCTTTTCTATCCTA  
+  
FFFFFFFFFFFFFFFFFFFFFFFFFFFFFFFFFFFFFFFFFFFFFFFFFFFFFFFFFFFFFFFFFFFFFFFF  
FFFFFFFFFFFFFFFFFFFFFFFFFFFFFFFFFFFFFFFFFFFFFFFFFFFFFFFFFFFFFFFFFFFFFFFF  
@A00155:342:HHGFNDSXY:1:1107:11858:14231 1:N:0:GAACCTAG+TCCGCATA  
GCTGTACATTGCAGACATCGCCCTCCTGACTGACGCTGGCAGCGTCCTCGCGTCGGTTTCGCGTGTTAA  
CGTAGTACAACCAAGCGTCCTCACACCTCACTATTGTACAATATACCACGTCTTTTCTATCCTATGC  
+  
FFFFFFFFFFFFFFFFFFFFFFFFFFFFFFFFFFFFFFFFFFFFFFFFFFFFFFFFFFFFFFFFFFFFFFFF  
FFFFFFFFFFFFFFFFFFFFFFFFFFFFFFFFFFFFFFFFFFFFFFFFFFFFFFFFFFFFFFFFFFFFFFFF  
@A00155:342:HHGFNDSXY:1:1371:3260:34914 2:N:0:GAACCTAG+TCCGCATA  
ACATCGCCCTCCTGACTGACGCTGGCAGCGTCCTCGCGTCGGTTTCGCGTGTTAACGTAGTACAACCA  
CGCTCCTCACACCTCACTATTGTACAATATACCACGTCTTTTCTATCCTATGCGCTCCAAAGCCTCC  
+  
FFFFFFFFFFFFFFFFFFFFFFFFFFFFFFFFFFFFFFFFFFFFFFFFFFFFFFFFFFFFFFFFFFFFFFFF  
FFFFFFFFFFFFFFFFFFFFFFFFFFFFFFFFFFFFFFFFFFFFFFFFFFFFFFFFFFFFFFFFFFFFFFFF  
@A00155:342:HHGFNDSXY:1:2249:17390:31767 2:N:0:GAACCTAG+TCCGCATA  
CATCGCCCTCCTGACTGACGCTGGCAGCGTCCTCGCGTCGGTTTCGCGTGTTAACGTAGTACAACCAAG  
CGTCCTCACACCTCACTATTGTACAATATACCACGTCTTTTCTATCCTATGCGCTCCAAAGCCTCCA  
+  
FFFFFFFFFFFFFFFFFFFFFFFFFFFFFFFFFFFFFFFFFFFFFFFFFFFFFFFFFFFFFFFFFFFFFFFF  
FFFFFFFFFFFFFFFFFFFFFFFFFFFFFFFFFFFFFFFFFFFFFFFFFFFFFFFFFFFFFFFFFFFFFFFF  
@A00155:342:HHGFNDSXY:1:1504:15691:7560 2:N:0:GAACCTAG+TCCGCATA  
CGCCCTCCTGACTGACGCTGGCAGCGTCCTCGCGTCGGTTTCGCGTGTTAACGTAGTACAACCAAGCGT  
CCTCACACCTCACTATTGTACAATATACCACGTCTTTTCTATCCTATGCGCTCCAAAGCCTCCAACA  
+  
FFFFFFFFFFFFFFFFFFFFFFFFFFFFFFFFFFFFFFFFFFFFFFFFFFFFFFFFFFFFFFFFFFFFFFFF  
FFFFFFFFFFFFFFFFFFFFFFFFFFFFFFFFFFFFFFFFFFFFFFFFFFFFFFFFFFFFFFFFFFFFFFFF  
@A00155:342:HHGFNDSXY:1:2372:27887:12211 2:N:0:GAACCTAG+TCCGCATA  
CCCTCCTGACTGACGCTGGCAGCGTCCTCGCGTCGGTTTCGCGTGTTAACGTAGTACAACCAAGCGTCC  
TCACACCTCACTATTGTACAATATACCACGTCTTTTCTATCCTATGCGCTCCAAAGCCTCCAACACC  
+  
F:FF:FFFFFFFFFFFFFFFFFFFFFFFFFFFFFFFFFFFFFFFFFFFFFFFFFFFFFFFFFFFFFFFFFFFF  
FF:FFFF,FFFF,FFFFFFFFFFFFFFFFFFFFFFFFFFFFFFFFFFFFFFFFFFFFFFFFFFFFFFFFFFFF  
@A00155:342:HHGFNDSXY:1:1249:20157:16172 2:N:0:GAACCTAG+TCCGCATA  
CCCTCCTGACTGACGCTGGCAGCGTCCTCGCGTCGGTTTCGCGTGTTAACGTAGTACAACCAAGCGTCC  
TCACACCTCACTATTGTACAATATACCACGTCTTTTCTATCCTATGCGCTCCAAAGCCTCCAACACC  
+  
FFFFFFFFFFFFFFFFFFFFFFFFFFFFFFFFFFFFFFFFFFFFFFFFFFFFFFFFFFFFFFFFFFFFFFFF  
FFFFF:FFFFF:FFFFFFFFFFFFFFFFFFFFFFFFFFFFFFFFFFFFFFFFFFFFFFFFFFFFFFFFFFFF  
FFFFF:FFFFF:FFFFFFFFFFFFFFFFFFFFFFFFFFFFFFFFFFFFFFFFFFFFFFFFFFFFFFFFFFFF  
@A00155:342:HHGFNDSXY:1:1249:20157:16172 2:N:0:GAACCTAG+TCCGCATA  
CCCTCCTGACTGACGCTGGCAGCGTCCTCGCGTCGGTTTCGCGTGTTAACGTAGTACAACCAAGCGTCC  
TCACACCTCACTATTGTACAATATACCACGTCTTTTCTATCCTATGCGCTCCAAAGCCTCCAACACC  
+  
FFFFFFFFFFFFFFFFFFFFFFFFFFFFFFFFFFFFFFFFFFFFFFFFFFFFFFFFFFFFFFFFFFFFFFFF  
FFFFF:FFFFF:FFFFFFFFFFFFFFFFFFFFFFFFFFFFFFFFFFFFFFFFFFFFFFFFFFFFFFFFFFFF  
FFFFF:FFFFF:FFFFFFFFFFFFFFFFFFFFFFFFFFFFFFFFFFFFFFFFFFFFFFFFFFFFFFFFFFFF  
@A00155:342:HHGFNDSXY:1:1249:20157:16172 2:N:0:GAACCTAG+TCCGCATA  
CCCTCCTGACTGACGCTGGCAGCGTCCTCGCGTCGGTTTCGCGTGTTAACGTAGTACAACCAAGCGTCC  
TCACACCTCACTATTGTACAATATACCACGTCTTTTCTATCCTATGCGCTCCAAAGCCTCCAACACC  
+

[illegible]



@A00155:342:HHGFNDSXY:1:1107:11858:14231 2:N:0:GAACCTAG+TCCGCATA  
CACCTCACTATTGTACAATATACCACGTCCTTTTCCTATCCTATGCGCTCCAAAGCCTCCAACACCATC  
TCTGTTTTTCGAGGCTGACATGGACTAACACATACACCGCCTTATGTCTCGGGACCACACTTATATTGC  
+  
FFFFFFFFFFFFFFFFFFFFFFF,FFFFFFFFFF:F::FFFFFFFFF:FFFFF,FFFF:FFFFFFFF:FFFF,FF  
FFFFFFFFFFFFFFFFFFFFFFFFFFFFFFFFFFFFFFFFFFFFFFFFFFFFFFFFFFFFFFFFFFFFFFFFFFFFF  
@A00155:342:HHGFNDSXY:1:1541:14705:8265 2:N:0:GAACCTAG+TCCGCATA  
CCTCACTATTGTACAATATACCACGTCCTTTTCCTATCCTATGCGCTCCAAAGCCTCCAACACCATCTC  
TGTTTTTCGAGGCTGACATGGACTAACACATACACCGCCTTATGTCTCGGGACCACACTTATATT  
+  
FFFFFFFFFFFFFFFFFFFFFFFFFFFFFFFFFFFFFFFFFFFFFFFFFFFFFFFFFFFFFFFFFFFFFFFFFFFFF,FFFFFFFFF:FFFFFFFFF:FFFFFFFFF  
FFFFFFFFFFFFFFFFFFFFFFFFFFFFFFFFFFFFFFFFFFFFFFFFFFFFFFFFFFFFFFFFFFFFFFFFFFFFFFFFF  
@A00155:342:HHGFNDSXY:1:2611:8043:2080 1:N:0:GAACCTAG+TCCGCATA  
TATTGTACAATATACCACGTCCTTTTCCTATCCTATGCGCTCCAAAGCATCCAACACCATCTCTGTTTT  
CGAGGCTGACATGGACTAACACATACACCGCCTTATGTCTCGGGACCACACTTATATTGCCATCCCGT  
+  
FFFFFFFFFFFFFFFFFFFFFFF:F,FFFF:FFFFFFFFFFFFFFF:FFF::FFFFF,FF:FFFFFFFFF:FFF:FFFF  
F,FFFFFFFF,FF:FFFFFFFFFFFFFFFFFFFFFFF,FFF:FFF:FFF,,FF:FFFF,,FFFFFF,F:FFF:F,:  
@A00155:342:HHGFNDSXY:1:2611:7663:2644 1:N:0:GAACCTAG+TCCGCATA  
TATTGTACAATATACCACGTCCTTTTCCTATCCTATGCGCTCCAAAGCCTCCAACACCATCTCTGTTTT  
CGAGGCTGACATGGACTAACACATACACCGCCTTATGTCTCGGGACCACACTTATATTGCCATCCCGT  
+  
FFFFFFFFFFFFFFFFFFFFFFFFFFFFFFFFFFFFFFFFFFFFFFFFFFFFFFFFFFFFFFFFFFFFFFFFFFFFF:FF:FFFFFFFFF:FFFFFFFFF:FFFFFFFF,FFFF  
F,FF:FFFFFFFFF:FFFFFFFFF:FFFFFFFFFFFFFFFFFFFFFFFFFFFFFFFFFFFFFFFFF,:FFFFFFFFFFFF,FFF  
@A00155:342:HHGFNDSXY:1:1266:16821:8422 1:N:0:GAACCTAG+TCCGCATA  
TATTGTACAATATACCACGTCCTTTTCCTATCCTATGCGCTCCAAAGCCTCCAACACCATCTCTGTTTT  
CGAGGCTGACATGGACTAACACATACACCGCCTTATGTCTCGGGACCACACTTATATTGCCATCCCTT  
+  
FFFFFFFFFFFFFFFFFFFFFFFFFFFFFFFFFFFFFFFFFFFFFFFFFFFFFFFFFFFFFFFFFFFFFFFFFFFFF  
FFFFFFFFFFFFFFF:FFFFFFFFFFFFFFFFFFFFFFFFFFFFFFFFFFFFFFFFFFFFFFFFFFFFFFFFFFFFF,FFFF:FFFFFFFFF  
@A00155:342:HHGFNDSXY:1:1636:10854:21073 1:N:0:GAACCTAG+TCCGCATA  
TATTGTACAATATACCACGTCCTTTTCCTATCCTATGCGCTCCAAAGCCTCCAACACCATCTCTGTTTT  
CGAGGCTGACATGGACTAACACATACACCGCCTTATGTCTCGGGACCACACTTATATTGCCATCCCTT  
+  
FFFFFFFFFFFFFFFFFFFFFFFFFFFFFFFFFFFFFFFFFFFFFFFFFFFFFFFFFFFFFFFFFFFFFFFFFFFFF,FFFFFFFFFFFFFFFFFFFFF  
FFFFFFFFFFFFFFFFF:FFFFFFFFFFFFFFFFFFFFFFFFFFFFFFFFFFFFFFFFFFFFFFFFFFFFFFFFFFFFF:FF:FFFFF,FFF  
@A00155:342:HHGFNDSXY:1:1541:14705:8265 1:N:0:GAACCTAG+TCCGCATA  
TGTACAATATACCACGTCCTTTTCCTATCCTATGCGCTCCAAAGCCTCCAACACCATCTCTGTTTTCGA  
GGCTGACATGGACTAACACATACACCGCCTTATGTCTCGGGACCACACTTATATTGCCATCCCGTATC  
+  
FFF:FFFFFFFFFFFFFFFFFFFFFFFFFFFFFFFFFFFFFFFFFFFFFFFFFFFFFFFFFFFFFFFFFFFFFFFFFFFFF  
FFFFFFFFFFFFFFFFFFFFFFFFFFFFFFFFFFFFFFFFFFFFFFFFFFFFFFFFFFFFFFFFFFFFFFFFFFFFFFFFF  
@A00155:342:HHGFNDSXY:1:2216:30346:9706 1:N:0:GAACCTAG+TCCGCATA  
TGTACAATATACCACGTCCTTTTCCTATCCTATGCGCTCCAAAGCCTCCAACACCATCTCTGTTTTCGA  
GGCTGACATGGACTAACACATACACCGCCTTATGTCTCGGGACCACACTTATATTGCCATCCCTTATC  
+  
FFFFFFFFFFFFFFFFFFFFFFFFFFFFFFFFFFFFFFFFFFFFFFFFFFFFFFFFFFFFFFFFFFFFFFFFFFFFF  
FFFFFFFFFFFFFFFFFFFFFFFFFFFFFFFFFFFFFFFFFFFFFFFFFFFFFFFFFFFFFFFFFFFFFFFFFFFFFFFFF  
@A00155:342:HHGFNDSXY:1:2160:31937:20134 1:N:0:GAACCTAG+TCCGCATA  
ATATACCACGTCCTTTTCCTATCCTATGCGCTCCAAAGCCTCCAACACCATCTCTGTTTTTCGAGGCTGA  
CATGGACTAACACATACACCGCCTTATGTCTCGGGACCACACTTATATTGCCATCCCGTATCGAACAC  
+  
FFFFFFFFFFFFFFFFFFFFFFFFFFFFFFFFFFFFFFFFFFFFFFFFFFFFFFFFFFFFFFFFFFFFFFFFFFFFF  
FFFFFFFFFFFFFFFFFFFFFFFFFFFFFFFFFFFFFFFFFFFFFFFFFFFFFFFFFFFFFFFFFFFFFFFFFFFFFFFFF  
@A00155:342:HHGFNDSXY:1:2160:31937:20134 1:N:0:GAACCTAG+TCCGCATA

@A00155:342:HHGFNDSXY:1:1329:32353:27774 2:N:0:GAACCTAG+TCCGCATA  
GTCTTTTCCTATCCTATGCGCTCCAAAGCCTCCAACACCATCTCTGTTTTTCGAGGCTGACATGGACTA  
ACACATACACCGCCTTATGTCTCGGGACCACACTTATATTGCCATCCCGTATCGAACACCACAC

+

FF:FFFFFFFF:FFFFFFFF:FFFF,:FFFFFFFF,FFFFFFFF:FFFFFFFFFFFFFFFFFFFFFFFF  
FFFFFFFFFFFFFFFFFFFFFFFF:FFFFFFFFFFFFFFFFFFFFFFFFFFFFFFFFFFFFFFFFFFFFFFFF:F

@A00155:342:HHGFNDSXY:1:2160:31937:20134 2:N:0:GAACCTAG+TCCGCATA  
TTTCCTATCCTATGCGCTCCAAAGCCTCCAACACCATCTCTGTTTTTCGAGGCTGACATGGACTAACAC  
ATACACCGCCTTATGTCTCGGGACCACACTTATATTGCCATCCCGTATCGAACACCACACTGGGATAT

+

F,FFFF,:FFFFFFFFFFFFFFFF:FFFFFF:FF:FFFFFFFF:FFFFFFFFFFFFFFFFFFFFFFFF  
F:FFFFFFFF:F,FFFFFFFFFFFFFFFFFFFFFFFFFFFFFFFFFFFFFFFFFFFFFFFFFFFFFFFF

@A00155:342:HHGFNDSXY:1:1329:25084:16470 1:N:0:GAACCTAG+TCCGCATA  
CCTATGCGCTCCAAAGCCTCCAACACCATCTCTGTTTTTCGAGGCTGACATGGACTAACACATACACCG  
CCTTATGTCTCGGGACCACACTTATATTGCCATCCCGTATCGAACACCACACTGGGATATTGTTTTTT

+

FFFFFFFFFFFFFFFFFFFFFFFFFFFFFFFF:FFFFFFFFFFFFFFFFFFFFFFFF:FFFFFFFFFFFFFFFF  
FFFFFFFFFFFFFFFFFFFFFFFFFFFFFFFF:FFFFFFFFFFFFFFF,FFFFFFFFFFFFFF:F:FFFF:FFFFFFFF

@A00155:342:HHGFNDSXY:1:1353:29451:36902 1:N:0:GAACCTAG+TCCGCATA  
CCTATGCGCTCCAAAGCCTCCAACACCATCTCTGTTTTTCGAGGCTGACATGGACTAACACATACACCG  
CCTTATGTCTCGGGACCACACTTATATTGCCATCCCGTATCGAACACCACACTGGGATATTGTTTTTT

+

FFFFFF:FFFFFFFFFFFFFFFFFFFFFFFFFFFFFFFF:F:FFFFFFFF:FFFFFFFFFFFFFFFF  
FFFFFFFFFFFFFFFFFFFFFFFFFFFFFFFF:FFFFFFFFFFFFFFFFFFFFFFFF:FFFFFFFFFFFFFFF,FFFFFFFF

@A00155:342:HHGFNDSXY:1:1329:32353:27774 1:N:0:GAACCTAG+TCCGCATA  
ATGCGCTCCAAAGCCTCCAACACCATCTCTGTTTTTCGAGGCTGACATGGACTAACACATACACCGCCT  
TATGTCTCGGGACCACACTTATATTGCCATCCCGTATCGAACACCACACTGGGATATTGTTTTTT

+

FFFFFFFFFFFFFFFFFFFFFFFFFFFFFFFFFFFFFFFFFFFFFFFFFFFFFFFFFFFFFFFFFFFFFFF  
FFFFFFFFFFFFFFFFFFFFFFFFFFFFFFFFFFFFFFFF:FFFFFFFFFFFFFFFFFFFFFFFFFFFFFFFF

@A00155:342:HHGFNDSXY:1:2341:4390:12665 1:N:0:GAACCTAG+TCCGCATA  
ATGCGCTCCAAAGCCTCCAACACCATCTCTGTTTTTCGAGGCTGACATGGACTAACACATACACCGCCT  
TATGTCTCGGGACCACACTTATATTGCCATCCCGTATCGAACACCACACTGGGATATTGTTTTTTGTCT

+

FFFFFFFFFFFFFFFFFFFFFFFFFFFFFFFFFFFFFFFFFFFFFFFFFFFFFFFFFFFFFFFFFFFFFFF  
FFFFFFFFFFFFFFFFFFFFFFFFFFFFFFFF:FFFFF:FFFFFFFFFFFFFFF:,FFFFFF:FFFFFFFFFFFFFF

@A00155:342:HHGFNDSXY:1:1132:21305:22044 1:N:0:GAACCTAG+TCCGCATA  
CTCCAAAGCCTCCAACACCATCTCTGTTTTTCGAGGCTGACATGGACTAACACATACACCGCCTTATGT  
CTCGGGACCACACTTATATTGCCATCCCGTATCGAACACCACACTGGGATATTGTTTTTTGTCAAAGC

+

FFFFFFFFFFFFFFFFFFFFFFFFFFFFFFFFFFFFFFFFFFFFFFFFFFFFFFFFFFFFFFFFFFFFFFF  
FFF:FFFFFF:F:FFFFFFFFFFFFFFFFFFFFFFFF:FFFFFFFFFFFFFFFFFFFFFFFFFFFFFFFF

@A00155:342:HHGFNDSXY:1:1221:5575:31501 1:N:0:GAACCTAG+TCCGCATA  
CCAAAGCCTCCAACACCATCTCTGTTTTTCGAGGCTGACATGGACTAACACATACACCGCCTTATGTCT  
CGGGACCACACTTATATTGCCATCCCTTATCGAACACCACACTGGGATATTGTTTTTTGTCAAAGCTT

+

FFFFF,FFFFFFFFFFFFFFFF,FFF:FFFFFFFFFFFFFF:FFFFFFFFFFFFFFFFFFFFFF:FFFFFFFF  
F:FFFF,,FFFF:FFFFFFFFFFFFFFFFFFFFFFFFFFFFFFFF:FFF:FFF,FFFFFFFFFFFFFFFF:

@A00155:342:HHGFNDSXY:1:2311:1651:25113 2:N:0:GAACCTAG+TCCGCATA  
CTCCAACACCATCTCTGTTTTTCGAGGCTGACATGGACTAACACATACACCGCCTTATGTCTCGGGACC  
ACACTTATATTGCCATCCCGTATCGAACACCACACTGGGATATTGTTTTTTGTCAAAGCTTCCTT

+

FFFFFFFFFFFFFFFFFFFFFFFFFFFFFFFFFFFFFFFFFFFFFFFFFFFFFFFFFFFFFFFFFFFFFFF  
FFFFFFFFFF,FFFFFFFFFF:FFFFFFFFFFFFFFFFFFFFFFFFFFFFFFFFFFFFFFFFFFFFFFFF:FFFFF



[illegible]



@A00155:342:HHGFNDSXY:1:1517:13069:31548 2:N:0:GAACCTAG+TCCGCATA  
CCTGCCGTCTCCCTCCACCATTCAGGCTGGCCGGGTCATTTCAGTAGTGTATCTCTTCAGCGCT  
GTACTCCCCAACGCCTGATCCCACCATGCCCTACATGCCTTCCACAGGTGGGGCACCC

```
FFFFFFFFFFFFFFFFFFFFFFFFFFFFFFFFFFFFFFFFFFFFF:FFFFFFFFFFFFFFFFFFFFFFFFF:FFFFFFFFFFFFFFFFF
FFFFFFFFFFFFFFFFFFFFFFFFF,:FFFFFFFFFFFFFFFFFFFFFFFFFFFFFFFFFFFFFFFFFFFFFFFFF
```

@A00155:342:HHGFNDSXY:1:2526:11143:12367 2:N:0:GAACCTAG+TCCGCATA  
GCCGTCTCCCTCCACCATTCAGGCTGGCCGGTCACTATTCAGTAGTGTTATCTCTTCAGCGCTGTA  
CTCCCCCAACGCCTGATCCCACCATGCCCTACATGCCTTCCACAGGTGGGGCACCTGCTCCAAGTT

[illegible]

@A00155:342:HHGFNDSXY:1:2371:8721:11929 2:N:0:GAACCTAG+TCCGCATA  
CCTCCCTCCACCATT CAGGCTGGCCGGGTCATT CAGTAGTGTTATCTCTTCAGCGCTGTACTCCC  
CCAACGCCTGATCCCAACATGCCCTACATGCCTTCCACAGGTGGGGCACCTGCTCCAAGTTTGGCT

```

FFFFFFFFFFFFFFFF:FFFFFFFFFF,FFFFFFFFFF:FFF,F,FFFFFFFFFFFFFFFFFFFFFFFFFFFFFFFF:FFFFFF
FF:FFFFFFFFFFFFFFFF:FFFFFFFFFFFF,FFFFFFFFFFFF,FFFFFFFFFFFFFFFFFFFFFFFFFFFFFFFFFFFFFF

```

@A00155:342:HHGFNDSXY:1:1517:13069:31548 1:N:0:GAACCTAG+TCCGCATA  
CCACCATT CAGGCTGGCCGGGTCATT CAGTAGTGTATCTCTTCAGCGCTGTACTCCCCAACGC  
CTGATCCCACCATGCCCTACATGCCTTCCACAGGTGGGGCACCCCTGCTCCAAGTTTGGC

[illegible]

FFFFFFFFFFFFFFFFFFFFFFFFFFFFFFFFFFFFFFFFFFFFFFFFFFFFFFFFFFFFFFFFFFFFFFFFF  
@A00155:342:HHGFNDSXY:1:2505:12219:26976 1:N:0:GAACCTAG+TCCGCATA

GCCGGGTCACTATTTCAGTAGTGTTATCTCTTCAGCGCTGTA  
CTCCCCAACGCCTGATCCCACCATGC  
CCCTACATGCCTTCCACAGGTGGGGCACCCTGCTCCAAGTTTGGCTGAGGGATCACGCCAGCCTGAAC  
+

```
FFFF:FF:FFFFFFFFFFFF:F,:F,FF:FF:F:F:FF:FFFFFFFF:F:F,F:F,F:FFFFFFFF
F,FFFFF,:FF,FFFFFFFFFFFF:FFFFFFFFFFFFFF:FF::,FF:FFFFFFFFFFFFFF:FF:FF
```

@A00155:342:HHGFNDSXY:1:1238:12454:23218 1:N:0:GAACCTAG+TCCGCATA  
CCGGGTCACTATTACAGTAGTGTTATCTCTTCAGCGCTGTACTCCCCAACGCCTGATCCCACCATGCC  
CCTACATGCCTTCCACAGGTGGGGCACCTGCTCCAAGTTTGGCTGAGGGATCACGCCAGCCTGAACA

```
+
FFFFF,,:FFFFFF,FFFFFF:FFF,FFFFFF:FFFFFFFFFFFFFFFFFFFFFFFFFFFFFFFF:FFFF
```

FFFFF:FFF,FFFFFFFFFFFFFFFFFFFFFF,FFFFFFFFFFFFFF:  
@A00155:342:HHGFNDSXY:1:1561:4354:21590 1:N:0:GAACCTAG+TCCGCATA

CCGGGTCACTATTTCAGTAGTGTTATCTCTTCAGCGCTGTA  
CTTCCCCAACGCCTGATCCCACCATGCC  
CCTACATGCCTTCCACAGGTGGGGCACCTGCTCCAAGTTTGGCTGAGGGATCACGCCAGCCTGAACA  
+

[illegible]

@A00155:342:HHGFNDSXY:1:2428:30255:33379 1:N:0:GAACCTAG+TCCGCATA  
CCGGGTCAC TATTCAGTGTATCTCTTCAGCGCTGTACTCCCCAACGCCTGATCCCACCATGCC  
CCTACATGCGCTTCCACAGGTGGGGGACCCCTGCTCCAAGTTTGGCTGAGGGGATCAGCCAGCCTGAACA

CCCTACATGCGCTTCCACACAGGTGGGGCACCCCTGCCTCCAAATTTGGCTGAGGGGAATCAGGCCACGCTTGACCA  
+  
EE.EEE.EE.E.E.EE E..EEEEEE.FEE E.E.FEE EEEEEEEE.FEE FEE EEEEE .EE

FF, F: F: FFF: FFFF, F, FFFFFFFF, FF, FFFF, FFFFFFFF, F: :, FF, FFF: F  
@A00155:342:HHGENDSXY:1:2665:28420:6997 2:N:0:GAACCTAG+TCCGCATA

TATTTCAGTAGTGTTATCTCTTCAGCGCTGTACTCCCCCAACGCCTGATCCCACCATGCCCTACATGC  
CTTCCACAGGTGGGGCACCCCTGCTCCAAGTTTGGCTGAGGGATCACGCCAGCCTGAACACCTGTTACA

```

+
FF.FFFFFFFFFF:FFFFFFFF:FFFFFFF:FFFFFFFFF::FFFFFF::FFFF:F:FFFFFFFFFFFF.FF

```

[illegible]

[illegible]

@A00155:342:HHGFNDSXY:1:1366:4381:24706 2:N:0:GAACCTAG+TCCGCATA  
GCGTTGTA CCCCCAACGCCTGATCCACCATGCCCTACATGCCTTCCACAGGTGGGGCACCTGC  
TCCAAGTTTGGCTGAGGGATCACGCCAGCCTGAACACCTGTTACAAACCGAAAACCTGCTCTT

[illegible]

+

[illegible]

+

[illegible]

+

[illegible]

+

```
FFFFFFFFFFFFFFFFFFFFFFFFFFFF:FFFFFFFFFFFFFFFFFFFFFFFFFFFF:FFFFFFFFFFFFFFFFFFFF
FFFFFFFFFFFFFFFFFFFFFFFFFFFF:FFFFFFFFFFFF:FFFFFFF:FFFFFFFFFFFFFFFFFFFF:FF
```

+

```
F,F,:,:,FFFFFFFF,FFFF,FFFFFFFFFFFFFFFFFFFFFF:FFFFF,FFFFF,FFFFFFFFFFFFFFFFFFFFFF
FFFFFFFFFFFFFFFFFFFFFFFFFFFFFFFF.FFFFFFFF.FFFFFFFF,FFFFF.FF.FFFFFFFFFFFFFFFFFFFF
```

 $+$ [illegible]

+

```
FFFF,FFFFFFFFFFFFFFFFFFFFFFFFFFFFFFFFFFFFFFFFFFFFFFFFFFFFFFFFFFFFFFFF:F
FFFFFFFFFFFF.FFFFFFFFFFFFFFFFFFFFFFFF FFFFFFFF FFFFFFFFFFFFFFFFFFFFFFFF
```

+

[illegible]

@A00155:342:HHGFNDSXY:1:2226:21603:28322 2:N:0:GAACCTAG+TCCGCATA  
CCTGATCCCACCATGCCCTACATGCCTTCCACAGGTGGGGCACCTGCTCCAAGTTTGGCTGAGGGA  
TCACGCCAGCCTGAACACCTGTTACAAACCGAAAACCTGCTCTTCTCGGGTTATGTAACC

+

[illegible]

@A00155:342:HHGFNDSXY:1:2645:29179:21715 2:N:0:GAACCTAG+TCCGCATA  
TGATCCCACCATGCCCTACATGCCTTCCCCAGGTGGGGCACCCTGCTCCAAGTTTGGCTGAGGGATC  
ACGCCAGCCTGAACACCTGTTACAAACCGAAAACCCTGCTCTTCTCGGGTTATGTAACCTCGCATCCG

+

```
FFF:FFF,FF:FFFFFFFFFFFF:FFFF:FF,FFFFFFFFFFFFFFFFFFFFFFFFFFFFFFFFFFFFFFFF
FFFFFFFFFFFFFFFFFFFFFFFFFFFF:FFFF:FFFFFFFFFFFFFFFFFFFFFFFFFFFFFFFFFFFFFFFF:FFFF
```

@A00155:342:HHGFNDSXY:1:1630:25916:8985 1:N:0:GAACCTAG+TCCGCATA  
GATCCACCATGCCCTACATGCCCTCCACAGGTGGGGACCCTGCTCCAAGTTTGCTGAGGGATCA  
CGCCAGCCTGAACACCTGTTACAAACCGAAAACCCTGCTCTTCTCGGGTTATGTAACCTCGCATCCGC

+

[illegible]

@A00155:342:HHGFNDSXY:1:2558:28411:33004 1:N:0:GAACCTAG+TCCGCATA  
ATCCCACCATGCCCTACATGCCTTCCACAGGTGGGGCACCCTGCTCCAAGTTTGGCTGAGGGATCAC  
GCCAGCCTGAACACCTGTTACAAACCGAAAACCCTGCTCTTCTCGGGTTATGTAACCTCGCATCCGC

+

```

FFFFFFFFFFFFFFFFFFFFFFFFFFFFFFFFFFFFFFFFFFFFFFFFFFFFFFFFFFFFFFFFFFFFFFFFFFFFFFFF
FFFFFFFF:FF,E:FFFFFFFFFF,FFFFFFFFFFFFFFFFFFFFFFFFFFFFFFFFFFFFFFFF:FFFFFFFF:FFFF

```

@A00155:342:HHGFNDSXY:1:1243:27109:8234 2:N:0:GAACCTAG+TCCGCATA  
ATCCCACCATGCCCTACATGCCTTCCACAGGTGGGGCACCCTGCTCCAAGTTTGGCTGAGGGATCAC  
GCCAGCCTGAACACCTGTTACAAACCGAAAACCTGCTCTTCTCGGGTTATGTAACCTCGCATCCGCT

+

[illegible]

@A00155:342:HHGFNDSXY:1:2254:9118:9643 1:N:0:GAACCTAG+TCCGCATA  
ATCCCACCATGCCCTACATGCCTTCCACAGGTGGGGCACCCTGCTCCAAGTTTGGCTGAGGGATCAC  
GCCAGCCTGAACACCTGTTACAAACCGAAAACCTGCTCTTCTCGGGTTATGTAACCTCGCATCCGCT

+

[illegible]

@A00155:342:HHGFNDSXY:1:1141:18150:28134 1:N:0:GAACCTAG+TCCGCATA  
ATCCCACCATGCCCTACATGCCTTCCACAGGTGGGGCACCCTGCTCCAAGTTTGGCTGAGGGATCAC  
GCCAGCCTGAACACCTGTTACAAACCGAAAAACCTGCTCTTCTCGGGTTATGTAACCTCGCATCCGCT

+

[illegible]

@A00155:342:HHGFNDSXY:1:1313:10529:12994 1:N:0:GAACCTAG+TCCGCATA  
ATCCCACCATGCCCTACATGCCTTCCACAGGTGGGGCACCCTGCTCCAAGTTTGGCTGAGGGATCAC  
GCCAGCCTGAACACCTGTTACAAACCGAAAAACCTGCTCTTCTGGGTTATGTAACCTCGCATCGCT

+

[illegible]

@A00155:342:HHGFNDSXY:1:1322:5132:22404 2:N:0:GAACCTAG+TCCGCATA  
CACCATGCCCCTACATGCCTTCCACAGGTGGGGCACCCTGCTCCAAGTTTGGCTGAGGGATCACGCCA  
GCCTGAACACCTGTTACAAACCGAAAAACCTGCTCTTCTCGGGTTATGTAACCTCGCATCCG

 $+$ [illegible]

@A00155:342:HHGFNDSXY:1:1519:17526:2284 2:N:0:GAACCTAG+TCCGCATA  
CACCATGCCCCTACATGCCTTCCACAGGTGGGGCACCTGCTCCAAGTTTGGCTGAGGGATCACGCCA  
GCCTGAACACCTGTTACAAACCGAAAACCCTGCTCTTCTCGGGTTATGTAACCTCGCATCCG

+

FFFFFFFFFFFFFFFFFFFFFFFFFFFFFFFFFFFFFFFFFFFFFFFFFFFFFFFFFFFFFFFFFFFFFFFF  
FFFFFFFFFFFFFFFFFFFFFFFFFFFFFFFFFFFFFFFFFFFFFFFFFFFFFFFFFFFFFFFFFFFFFFFF

@A00155:342:HHGFNDSXY:1:1322:5014:21386 2:N:0:GAACCTAG+TCCGCATA  
CACCATGCCCCTACATGCCTTCCACAGGTGGGGCACCTGCTCCAAGTTTGGCTGAGGGATCACGCCA  
GCCTGAACACCTGTTACAAACCGAAAACCCTGCTCTTCTCGGGTTATGTAACCTCGCATCCG

+

FFFFFFFFFFFF:FFFFFFFFFFFFFFFFFFFFFFFFFFFFFFFFFFFFFFFFFFFFFFFFFFFFFFFFFFFF  
FFFFFFFFFFFF,FFFFFFFFFFFFFFFFFFFFFFFFFFFFFFFFFFFFFFFFFFFFFFFFFFFFFFFFFFFF

@A00155:342:HHGFNDSXY:1:2607:12219:2832 1:N:0:GAACCTAG+TCCGCATA  
CACCATGCCCCTACATGCCTTCCACAGGTGGGGCACCTGCTCCAAGTTTGGCTGAGGGATCACGCCA  
GCCTGAACACCTGTTACAAACCGAAAACCCTGCTCTTCTCGGGTTATGTAACCTCGCATCCGCTGCAC

+

FFFFFFFFFFFFFFFFFFFFFFFFFFFFFFFFFFFFFFFFFFFFFFFFFFFFFFFFFFFFFFFFFFFFFFFF  
FFFFFF:FFFFFFFFFFFFFFFFFFFFFFFFFFFFFFFFFFFFFFFFFFFFFFFFFFFFFFFFFFFFFFFF

@A00155:342:HHGFNDSXY:1:2607:12626:1219 1:N:0:GAACCTAG+TCCGCATA  
CACCATGCCCCTACATGCCTTCCACAGGTGGGGCACCTGCTCCAAGTTTGGCTGAGGGATCACGCCA  
GCCTGAACACCTGTTACAAACCGAAAACCCTGCTCTTCTCGGGTTATGTAACCTCGCATCCGCTGCAC

+

FFFFFFFFFFFFFFFFFFFFFFFFFFFFFFFFFFFFFFFFFFFFFFFFFFFFFFFFFFFFFFFFFFFFFFFF  
FFFFFFFFFFFFFFFFFFFFFFFFFFFFFFFFFFFFFFFFFFFFFFFFFFFFFFFFFFFFFFFFFFFFFFFF

@A00155:342:HHGFNDSXY:1:2607:12626:1125 1:N:0:GAACCTAG+TCCGCATA  
CACCATGCCCCTACATGCCTTCCACAGGTGGGGCACCTGCTCCAAGTTTGGCTGAGGGATCACGCCA  
GCCTGAACACCTGTTACAAACCGAAAACCCTGCTCTTCTCGGGTTATGTAACCTCGCATCCGCTGCAC

+

FFFFFFFFFFFFFFFFFFFFFFFFFFFFFFFFFFFFFFFFFFFFFFFFFFFFFFFFFFFFFFFFFFFFFFFF  
FFFFFFFFFFFFFFFFFFFFFFFFFFFFFFFFFFFFFFFFFFFFFFFFFFFFFFFFFFFFFFFFFFFFFFFF

@A00155:342:HHGFNDSXY:1:2433:2284:18599 1:N:0:GAACCTAG+TCCGCATA  
ATGCCCCTACATGCCTTCCACAGGTGGGGCACCTGCTCCAAGTTTGGCTGAGGGATCACGCCAGCCT  
GAACACCTGTTACAAACCGAAAACCCTGCTCTTCTCGGGTTATGTAACCTCGCATCCGCTGCACTGTT

+

FFFFFFFFFFFFFFFFFFFFFFFFFFFFFFFFFFFFFFFFFFFFFFFFFFFFFFFFFFFFFFFFFFFFFFFF  
FFFFFFFFFFFFFFFFFFFFFFFFFFFFFFFFFFFFFFFFFFFFFFFFFFFFFFFFFFFFFFFFFFFFFFFF

@A00155:342:HHGFNDSXY:1:1629:21133:32675 1:N:0:GAACCTAG+TCCGCATA  
ATGCCCCTACATGCCTTCCACAGGTGGGGCACCTGCTCCAAGTTTGGCTGAGGGATCACGCCAGCCT  
GAACACCTGTTACAAACCGAAAACCCTGCTCTTCTCGGGTTATGTAACCTCGCATCCGCTGCACTGTT

+

:FFFFFFFFFFFFFFFFFFFFFFFFFFFFFFFFFFFFFFFFFFFFFFFFFFFFFFFFFFFFFFFFFFFF  
FFFFFFFFFFFFFFFFFFFFFFFFFFFFFFFFFFFFFFFFFFFFFFFFFFFFFFFFFFFFFFFFFFFF

@A00155:342:HHGFNDSXY:1:1629:21007:33270 1:N:0:GAACCTAG+TCCGCATA  
ATGCCCCTACATGCCTTCCACAGGTGGGGCACCTGCTCCAAGTTTGGCTGAGGGATCACGCCAGCCT  
GAACACCTGTTACAAACCGAAAACCCTGCTCTTCTCGGGTTATGTAACCTCGCATCCGCTGCACTGTT

+

:FFFFFFFFFFFF:FFFFFFFFFFFFFFFFFFFFFFFFFFFFFFFFFFFFFFFFFFFFFFFFFFFFFFFFFFFF  
FFFFFFFFFFFFFFFFFFFFFFFFFFFFFFFFFFFFFFFFFFFFFFFFFFFFFFFFFFFFFFFFFFFF

@A00155:342:HHGFNDSXY:1:2407:25274:26725 1:N:0:GAACCTAG+TCCGCATA  
GCCCCTACATGCCTTCCACAGGTGGGGCACCTGCTCCAAGTTTGGCTGAGGGATCACGCCAGCCTGA  
ACACCTGTTACAAACCGAAAACCCTGCTCTTCTCGGGTTATGTAACCTCGCATCCGCTGCACTGTTTC

+

:FFFFFFFFF:,FFF:F:FFFF,FF:FFFF:FFFFFFFF:FFF:,FF:FFFFFFFFFFFF,F:FFFFFFF  
FFFFFFFF:FFFF:FFFFF,FFFFFFFFFFFFFFFF:FF,FFFFFFFFFF:F:FFFF,FFFF:F,FFF

[illegible]

[illegible]

@A00155:342:HHGFNDSXY:1:1240:9570:30217 2:N:0:GAACCTAG+TCCGCATA  
CCTGCTCCAAGTTTGGCTGAGGGATCACGCCAGCCTGAACACCTGTTACAAACCGAAAACCTGCTCT  
TCTCGGGTTATGTAACCTCGCATCCGCTGCACTGTTTCATCTGTATTTACTGTCACTGTTA

[illegible]

GGCTGAGGGATCACGCCAGCCTGAACACCTGTTACAAACCGAAAACCTGCTCTTCTCGGGTTATGTA  
ACCTCGCATCCGCTGCACTGTTTCATCTGTATTTACTGTCACTGTTATATCTTTGGTTATCCTTACTC

[illegible]

GGCTGAGGGATCACGCCAGCCTGAACACCTGTTACAAACCGAAAACCTGCTCTTCTCGGGTTATGTA  
ACCTCGCATCCGCTGCACTGTTTCATCTGTATTTACTGTCACTGTTATATCTTTGGTTATCCTTACTC

```
FFFFFFFFFFFFFFFFFFFFFFFFFFFFFFFFFFFFF:FFFFF,FFF:FFFFFF,FFFFFFFFFFFFFFFFFF  
FFFFFFFFFFFFFFFFFFFFFFFFFFFFFFFFFFFFF:F:FFFFFFFFFFFFFFFFFFFF
```

GCTGAGGGATCACGCCAGCCTGAACACCTGTTACAAACCGAAAACCCTGCTCTTCTCGGGTTATGTAA  
CCTCGCATCCGCTGCACTGTTTCATCTGTATTTACTGTCAGTGTATATCTTTGGTTATCC

```

FFFFFFFFFFFFFFFF:FFFFFFFFFFFFFFFF:FFFFFFFFFFFFFFFF,FFFFFFF
FFFFFFF:FFFFFFFFFFFFFFFF:FF:FFFFFFFF:FF.,F.FFF,FFFFFFFF

```

GCTGAGGGATCACGCCAGCCTGAACACCTGTTACAAACCGAAAACCTGCTCTTCTCGGGTTATGTAA  
CCTCGCATCCGCTGCACTGTTTCATCTGTATTTACTGTCAGTGTATATCTTTGGTTATCC

[illegible]

GCTGAGGGATCACGCCAGCCTGAACACCTGTTACAAACCGAAAACCTGCTCTTCTCGGGTTATGTAA  
CCTCGCATCCGCTGCACTGTTTCATCTGTATTTACTGTCAGTGTATATCTTTGGTTATCCTTACTCT

[illegible]

GCTGAGGGATCACGCCAGCCTGAACACCTGTTACAAACCGAAACCCCTGCTCTTCTCGGGTTATGTAA  
CCTCGCATCCGCTGCACTGTTTCATCTGTATTTACTGTCACCTGTTATATCTTTGGTTATCCTTACTCT

```

FFFFFFFFFFFFFFFFFFFFFFFFFFFFFFFFFFFFFFFFFFFFFFFFFFFFFFFFFFFFFFFFFFFFFFFFFFFF,Ff:F
FFFFFFFFFFFFFFFFFFFFFFFFFFFFFFFFFFFFFFF:FFFFFFFFFFFFFFFFFFFFFFFFFFFFFFFFFFFFF:FFFFFFF

```

GCTCGAGGGATCACGCCAGCCTGAACACCTGTATTACAAACCGAAACCATCTGCTCTTCTCGGGTTATGTAA  
 CCTCGCATCCGCTGCATGTTTCATCTGTATTATCATGTCATCTGTTATCTTCTTTGGTTATCCTTACTCT

[illegible]

AGGGATCACGCCAGCAGCTGTAACACCTGTTACAAACCGAAAACCTGCTCTTTCGCGGTATGTAAACCTC  
GCATCCCGCTGCACCTGTTTCATCTGTATTTTACCTGTCACCTGTTATCTTTGGTATCTTACTTACTTACCA

[illegible]



@A00155:342:HHGFNDSXY:1:2423:24686:16595 1:N:0:GAACCTAG+TCCGCATA  
AGGGATCACGCCAGCCTGAACACCTGTTACAAACCGAAAACCCTGCTCTTCTCGGGTTATGTAACCTC  
GCATCCGCTGCACTGTTTCATCTGTATTTACTGTCACTGTTATATCTTTGGTTATCCTTACTCTACCA  
+  
FFFFFFFFFFFFFFFFFFFFFFFFFFFFFFFFFFFFFFFFFFFFFFFFFFFFFFFFFFFFFFFFFFFFFFFF  
FFFFFFFFFFFFFFFFFFFFFFFFFFFFFFFFFFFFFFFFFFFFFFFFFFFFFFFFFFFFFFFFFFFFFFFF  
@A00155:342:HHGFNDSXY:1:2533:29984:34632 1:N:0:GAACCTAG+TCCGCATA  
AGGGATCACGCCAGCCTGAACACCTGTTACAAACCGAAAACCCTGCTCTTCTCGGGTTATGTAACCTC  
GCATCCGCTGCACTGTTTCATCTGTATTTACTGTCACTGTTATATCTTTGGTTATCCTTACTCTACCA  
+  
FFFFFFFFFFFFFFFFFFFFFFFFFFFFFFFFFFFFFFFFFFFFFFFFFFFFFFFFFFFFFFFFFFFFFFFF  
FFFFFFFFFFFFFFFFFFFFFFFFFFFFFFFFFFFFFFFFFFFFFFFFFFFFFFFFFFFFFFFFFFFFFFFF:FFFFFFFF  
@A00155:342:HHGFNDSXY:1:2618:14769:22247 2:N:0:GAACCTAG+TCCGCATA  
TCACGCCAGCCTGAACACCTGTTACAAACCGAAAACCCTGCTCTTCTCGGGTTATGTAACCTCGCATC  
CGCTGCACTGTTACATCTGTATTTACTGTCACTGTTATATCTTTGGTTATCCTTACTCTACCACCAA  
+  
FFFFF:FFFFFFFFFFFFFFFFFFFFFFFF:FFFFF:F,FFFFFFFFFFFFFFFFFFFFFFFFFFFFFFFF:F  
FFFFFFFFFFFFFF,FFFFFFFFFFFFFFFFFFFFFFFFFFFFFFFF,FFFFFFFFFFFFFFFFFFFFFFFF:FFFFFFFFFF  
@A00155:342:HHGFNDSXY:1:2533:29984:34632 2:N:0:GAACCTAG+TCCGCATA  
GCCAGCCTGAACACCTGTTACAAACCGAAAACCCTGCTCTTCTCGGGTTATGTAACCTCGCATCCGCT  
GCACTGTTTCATCTGTATTTACTGTCACTGTTATATCTTTGGTTATCCTTACTCTACCACCAAATTCT  
+  
FFFFFFFFFFFFFFFFFFFFFFFFFFFFFFFFFFFFFFFFFFFFFFFFFFFFFFFFFFFFFFFFFFFFFFFF  
:F:FFFFFFFFFFFFFFFFFFFFFFFFFFFFFFFFFFFFFFFFFFFFFFFFFFFFFFFFFFFFFFFFFFFF  
@A00155:342:HHGFNDSXY:1:2602:25807:26334 1:N:0:GAACCTAG+TCCGCATA  
CAGCCTGAACACCTGTTACAAACCGAAAACCCTGCTCTTCTCGGGTTATGTAACCTCGCATCCGCTGC  
ACTGTTTCATCTGTATTTACTGTCACTGTTATATCTTTGGTTATCCTTACTCTACCACCAAATTCTGA  
+  
FFFFFFFFFFFFFFFFFFFFFFFFFFFFFFFFFFFFFFFFFFFFFFFFFFFFFFFFFFFFFFFFFFFFFFFF  
FFFFFFFFFFFFFFFFFFFFFFFFFFFFFFFFFFFFFFFFFFFFFFFFFFFFFFFFFFFFFFFFFFFFFFFF  
@A00155:342:HHGFNDSXY:1:2602:25807:26365 1:N:0:GAACCTAG+TCCGCATA  
CAGCCTGAACACCTGTTACAAACCGAAAACCCTGCTCTTCTCGGGTTATGTAACCTCGCATCCGCTGC  
ACTGTTTCATCTGTATTTACTGTCACTGTTATATCTTTGGTTATCCTTACTCTACCACCAAATTCTGA  
+  
FFFFFFFFFFFFFFF::FFFFFFFFFFFFFFFFFFFFFFFFFFFFFFFFFFFFFFFFFFFFFFFFFFFFFFFF  
FFFFFFFFFFFFFFF:FFFFFFFFFFFFFFFFFFFFFFFFFFFFFFFFFFFFFFFFFFFFFFFFFFFFFFFF:FFFFFFFFFFFFFF  
@A00155:342:HHGFNDSXY:1:1656:6054:21778 2:N:0:GAACCTAG+TCCGCATA  
AGCCTGAACACCTGTTACAAACCGAAAACCCTGCTCTTCTCGGGTTATGTAACCTCGCATCCGCTGCA  
CTGTTTCATCTGTATTTACTGTCACTGTTATATCTTTGGTTATCCTTACTCTACCACCAAATTCTGAT  
+  
FFFFFFFFFFFFFFF:FFFFFFFF:F:FFFF:FFFFFFFFFFFFFFFFFFFFFFFFFFFFFFFFFFFFFFFF  
,FFFFFFFFFFFFFFFFFFFFFFFFFFFFFFFFFFFFFFFFFFFFFFFFFFFFFFFFFFFFFFFFFFFFFFFF:F:FFFFFFFFFFFFFFF  
@A00155:342:HHGFNDSXY:1:1630:25916:8985 2:N:0:GAACCTAG+TCCGCATA  
CCTGAACACCTGTTACAAACCGAAAACCCTGCTCTTCTCGGGTTATGTAACCTCGCATCCGCTGCACT  
GTTTCATCTGTATTTACTGTCACTGTTATATCTTTGGTTATCCTTACTCTACCACCAAATTCTGATAT  
+  
FF:FFFFFFFF,FFFFFFFF:FFFFFFFFFFFFFFFFFFFFFFFFFFFFFFFFFFFFFFFFFFFFFFFF  
FFFFFFFFFFFFFFFFFFFFFFFFFFFFFFFFFFFFFFFFFFFFFFFFFFFFFFFFFFFFFFFFFFFFFFFF:FFFFFFFFFF,FFFFFFFFFFFFFFFFFFFFFFFF:FFF  
@A00155:342:HHGFNDSXY:1:1512:30617:10081 1:N:0:GAACCTAG+TCCGCATA  
TGAACACCTGTTACAAACCGAAAACCCTGCTCTTCTCGGGTTATGTAACCTCGCATCCGCTGCACTGT  
TTCATCTGTATTTACTGTCACTGTTATATCTTTGGTTATCCTTACTCTACCACCAAATTCTGATATAT  
+  
FFFFFFFFFFFFFFFFFFFFFFFFFFFFFFFFFFFFFFFFFFFFFFFFFFFFFFFFFFFFFFFFFFFFFFFF,FFFF,FFFFFFFFFFFFFFFFFFFFFFFF  
FFFFFFFFFFFFFFFFFFFFFFFFFFFFFFFFFFFFFFFFFFFFFFFFFFFFFFFFFFFFFFFFFFFFFFFF:FFFF:FFFFFFFF:FFFFFFFFFFFFFFFFFFFFFFFF,FFF

@A00155:342:HHGFNDSXY:1:2227:4761:35822 2:N:0:GAACCTAG+TCCGCATA  
AACACCTGTTACAAACCGAAAACCTGCTCTTCTCGGGTTATGTAACTCGCATCCGCTGCACTGTTT  
CATCTGTATTTACTGTCACTGTTATATCTTTGGTTATCCTTACTCTACCACCAAATTCTGAT

@A00155:342:HHGFNDSXY:1:1118:10122:33301 1:N:0:GAACCTAG+TCCGCATA  
AAACCGAAAACCCCTGCTCTTCTCGGGTTATGTAACCTCGCATCCGCTGCACTGTTTCATCTGTATTTA  
CTGTCACTGTTATATCTTTGGTTATCCTTACTCTACCACCAAATTCTGATATATCCTTCCTGTC

+

[illegible]

@A00155:342:HHGFNDSXY:1:1118:10963:34663 1:N:0:GAACCTAG+TCCGCATA  
AAACCGAAAACCCCTGCTCTTCTCGGGTTATGTAACCTCGCATCCGCTGCACTGTTTCATCTGTATTTA  
CTGTCACTGTTATATCTTTGGTTATCCTTACTCTACCACCAAATTCTGATATATCCTTCCTGTC

+

```

FFFFFFFFFFFFFFFFFFFFFF:FFFFFFFFFFFF:FFFFFFFFFF:FFFFFFFFFFFFFFFFFFFFFFFFFFFFFFFFFFFFFFFF
FFFFFFFFFFFFFFFFFFFFFF:FFFFFFFFFFFFF:FFFFFFFFFFFFFFFFFFFF:FFFFF:F:FFFF:FFFFFFF

```

@A00155:342:HHGFNDSXY:1:1365:31349:20838 2:N:0:GAACCTAG+TCCGCATA  
ACCGAAAACCTGCTCTTCTCGGGTTATGTAACTCGCATCCGCTGCACTGTTTCATCTGTATTTACT  
GTCAGTGTATATCTTTGGTTATCCTTACTCTACCACCAAATTCTGATATATCCTTCCTGTCTA

+

```
FF:FFFF:F,FFF:FFFF:F:F:FFF:FFF:,FFFFFF:FFFFFFFF,FFFFFF:FFFF,FFFFFF:F
FF:,FFFFFF:FFFFFFFFFFFFFF:FFFFFF:FFF:,FFF:FFFFFFFFFFFFFFFFFFFFFF,FFFFF
```

@A00155:342:HHGFNDSXY:1:2227:4761:35822 1:N:0:GAACCTAG+TCGCGATA  
CCGAAACCCTGCTCTTCTCGGGTTATGTAACCTCGCATCCGCTGCACTGTTTCATCTGTATTTACTG  
TCACTGTTATATCTTTGGTTATCCTTACTCTACCACCAAATTCTGATATATCCTTCCTGTCT

+

[illegible]

@A00155:342:HHGFNDSXY:1:1319:26232:2174 1:N:0:GAACCTAG+TCCGCATA  
AAAACCCTGCTCTTCTCGGGTTATGTAACCTCGCATCCGCTGCACTGTTTCATCTGTATTTACTGTCA  
CTGTTATATCTTTGGTTATCCTTACTCTACCACCAAATTCTGATATATCCTTCCTGTCTACATCATAC

+

```

FFFFF:F,::F:F:FFFF:F,FF:FFFFFFFFF:FFFFFFFFFFFF::,,FFF:FF:,FFFF,FFF
F:FFFFFFFFFFFFFFFFFFFF:FFFFFFF..FFF:.F.F:FFFF.FF.FFFFFFFF:FF:FFFFF.FFFF

```

@A00155:342:HHGFNDSXY:1:2514:14190:8124 1:N:0:GAACCTAG+TCCGCATA  
AAACCCTGCTCTTCTCGGGTTATGTAACCTCGCATCCGCTGCACTGTTTCATCTGTATTTACTGTCAC  
TGTTATATCTTTGGTTATCCTTACTCTACCACCAAATTCTGATATATCCTTCCTGTCTACATCATA

+

[illegible]

@A00155:342:HHGFNDSXY:1:1209:14913:14199 1:N:0:GAACCTAG+TCGCATA  
AAACCCTGCTCTTCTCGGGTTATGTAACCTCGCATCCGCTGCACTGTTTCATCTGTATTTACTGTCAC  
TGTTATATCTTTGGTTATCCTTACTCTACCACCAAAATTCTGATATATCCTTCCTGTCTACATCATACC

+

```

FFFFFFFFFFFF,FFFFFFFFFFFFFFFFFFFFFFFFFFFFFFFFFFFFFFFFFFFFFFFFFFFFFFFFFFFFFFFF:FFFFFFFF:FFFFFFFFFFFFFF
EEEEEE:EEEEEEEEEEEEEEEEEEEE:EEEEEEEEEEEEEEEEEEEEEEEEEEEEEEEEEEEEEEEEEEEEEEEEEE:EE

```

@A00155:342:HHGFNDSXY:1:1118:10122:33301 2:N:0:GAACCTAG+TCCGCATA  
AACCCTGCTCTTCTCGGGTTATGTAACCTCGCATCCGCTGCACTGTTTCATCTGTATTTACTGTCACT  
GTTATATCTTTGGTTATCCTTACTCTACCAACAAATTCTGATATATCCTTCCTGTCTACATCATACCA

+

[illegible]

@A00155:342:HHGFNDSXY:1:1118:10963:34663 2:N:0:GAACCTAG+TCCGCATA  
AACCCTGCTCTTCTCGGGTTATGTAACCTCGCATCCGCTGCACTGTTTCATCTGTATTTACTGTCACT  
GTTATATCTTTGGTTATCCTTACTCTACCAACAAATTCTGATATATCCTTCCTGTCTACATCATACCA

 $+$ [illegible]

@A00155:342:HHGFNDSXY:1:2139:12527:19867 1:N:0:GAACCTAG+TCCGCATA  
AACCTGCTCTTCTCGGGTTATGTAACCTCGCATCCGCTGCACTGTTTCATCTGTATTTACTGTCACT  
GTTATATCTTTGGTTATCCTTACTCTACCACCAAATTCTGATATATCCTTCCTGTCTACATCATACCA  
+  
FFFFFFFFFFFFFFFFFFFFFFFFFFFFFFFFFFFFFFFFFFFFFFFFFFFFFFFFFFFFFFFFFFFFFFFF  
FFFFFF:FFFFFF:FFFFFFFFFFFFFFFFFFFFFFFFFFFFFFFFFFFFFFFFFFFFFFFFFFFFFFFF  
@A00155:342:HHGFNDSXY:1:2123:19633:19398 1:N:0:GAACCTAG+TCCGCATA  
ACCCTGCTCTTCTCGGGTTATGTAACCTCGCATCCGCTGCACTGTTTCATCTGTATTTACTGTCACTG  
TTATATCTTTGGTTATCCTTACTCTACCACCAAATTCTGATATATCCTTCCTGTCTA  
+  
FFFFFFFFFFFFFFFFFFFFFFFFFFFFFFFFFFFFFFFFFFFFFFFFFFFFFFFFFFFFFFFFFFFFFFFF  
FFFFFFFFFFFFFFFFFFFFFFFFFFFFFFFFFFFFFFFFFFFFFFFFFFFFFFFFFFFFFFFFFFFFFFFF  
@A00155:342:HHGFNDSXY:1:1423:5801:9001 1:N:0:GAACCTAG+TCCGCATA  
ACCCTGCTCTTCTCGGGTTATGTAACCTCGCATCCGCTGCACTGTTTCATCTGTATTTACTGTCACTG  
TTATATCTTTGGTTATCCTTACTCTACCACCAAATTCTGATATATCCTTCCTGTCTA  
+  
FF:FFFFFFFF:FFFFFF,FFFFFFFFFFFFFFFFFFFFFFFFFFFFFFFFFFFFFFFFFFFFFFFF  
FFFFFFFFFFFFFFFFFFFFFFFFFFFFFFFFFFFFFFFFFFFFFFFFFFFFFFFFFFFFFFFFFFFFFFFF  
@A00155:342:HHGFNDSXY:1:1259:9335:11459 1:N:0:GAACCTAG+TCCGCATA  
ACCCTGCTCTTCTCGGGTTATGTAACCTCGCATCCGCTGCACTGTTTCATCTGTATTTACTGTCACTG  
TTATATCTTTGGTTATCCTTACTCTACCACCAAATTCTGATATATCCTTCCTGTCTA  
+  
FFFFFFFFFFFFFFFF:FFFFFFFFFFFFFFFFFFFFFFFFFFFFFFFFFFFFFFFFFFFFFFFFFFFFFFFF  
FFFFFFFFFFFFFFFFFFFFFFFFFFFFFFFFFFFFFFFFFFFFFFFFFFFFFFFFFFFFFFFFFFFFFFFF  
@A00155:342:HHGFNDSXY:1:2673:1398:23516 1:N:0:GAACCTAG+TCCGCATA  
ACCCTGCTCTTCTCGGGTTATGTAACCTCGCATCCGCTGCACTGTTTCATCTGTATTTACTGTCACTG  
TTATATCTTTGGTTATCCTTACTCTACCACCAAATTCTGATATATCCTTCCTTCTACATCATAC  
+  
FFFF:FFFFFFFF,FF:FFFFFFFF:F::F,FF::,F:FFFFFFFFFFFFFFFF,FF,F:  
FFFF:FFFF,FFFFFFFF,F:FF::,F,:FF:F,,F:FFF:,FF,F:,F:FFF,F:FFF:  
@A00155:342:HHGFNDSXY:1:1462:21956:15154 1:N:0:GAACCTAG+TCCGCATA  
CCTGCTCTTCTCGGGTTATGTAACCTCGCATCCGCTGCACTGTTTCATCTGTATTTACTGTCACTGTT  
ATATCTTTGGTTATCCTTACTCTACCACCAAATTCTGATATATCCTTCCTGTCTACATCATACC  
+  
FFFFFFFFFFFFFFFFFFFFFFFFFFFFFFFFFFFFFFFFFFFFFFFFFFFFFFFFFFFFFFFFFFFFFFFF  
FFFFFFFFFFFF,FFFFFFFFFFFFFFFFFFFFFFFFFFFFFFFFFFFFFFFFFFFFFFFFFFFFFFFF  
@A00155:342:HHGFNDSXY:1:1320:31837:9032 1:N:0:GAACCTAG+TCCGCATA  
TGCTCTTCTCGGGTTATGTAACCTCGCATCCGCTGCACTGTTTCATCTGTATTTACTGTCACTGTTAT  
ATCTTTGGTTATCCTTACTCTACCACCAAATTCTGATATATCCTTCCTGTCTACATCATACCATAGAC  
+  
FFFFFFFFFFFF:FFF:FFFFFFFFFFFFFFFFFFFFFFFFFFFFFFFFFFFFFFFFFFFFFFFFFFFF  
FF:FFFFFFFF,::,FFFFFFFFFFFFFFFFFFFFFFFFFFFFFFFFFFFFFFFFFFFFFFFFFFFF  
@A00155:342:HHGFNDSXY:1:1319:26232:2174 2:N:0:GAACCTAG+TCCGCATA  
GGGTTATGTAACCTCGCATCCGCTGCACTGTTTCATCTGTATTTACTGTCACTGTTATATCTTTGGTT  
ATCCTTACTCTACCACCAAATTCTGATATATCCTTCCTGTCTACATCATACCATAGACACACTCCCT  
+  
FFFFFFFF:F,:FF::FF::FFF:F:,FFFF:FF:FFF:FFF:FFFFFFFFFFFFFFFF:FFFF:FFF  
FFF,:F,FFF:FFFFFFFF:FFF,FFFF:FFFFFFFF,FF,FFF,F,FFF,FFF:FFF:FFF  
@A00155:342:HHGFNDSXY:1:1662:26196:33458 2:N:0:GAACCTAG+TCCGCATA  
GGGTTATGTAACCTCGCATCCGCTGCACTGTTTCATCTGTATTTACTGTCACTGTTATATCTTTGGTT  
ATCCTTACTCTACCACCAAATTCTGATATATCCTTCCTGTCTACATCATACCATAGACACACTCCCT  
+  
FFFFFFFFFFFFFFFFFFFFFFFFFFFFFFFFFFFFFFFFFFFFFFFFFFFFFFFFFFFFFFFFFFFFFFFF  
FFFFFFFFFFFF:FFFFFFFFFFFFFFFFFFFFFFFFFFFFFFFFFFFFFFFFFFFFFFFFFFFFFFFF

[illegible]

[illegible]

@A00155:342:HHGFNDSXY:1:1209:14913:14199 2:N:0:GAACCTAG+TCCGCATA  
TGTTTCATCTGTATTTACTGTCACCTGTTATATCTTTGGTTATCCTTACTCTACCACCAAATTCTGATA  
TATCCTTCCTGTCTACATCATACCATAGACACACTCCCTTACGCTGTATCTGTACACTATACTCTAAC  
+  
FFFFFFFFFFFFFFFFFFFFFFFFFFFFFFFFFFFFFFFFFFFFFFFFFFFFF:FFFFFFFFFFFFFFF:,FFFFFFFFFFFFFFFFFFFFFFFFF  
FFFFFFFFFFFFFFFFFFFFFFFFFFFFFFFFFFFFFFFFFFFFFFFFFFFFF:FFF:FFFFFFFFFFFFFFFFFFFFFFFFF:FFF::FF  
@A00155:342:HHGFNDSXY:1:2570:3794:13041 1:N:0:GAACCTAG+TCCGCATA  
GTTTCATCTGTATTTACTGTCACCTGTTATATCTTTGGTTATCCTTACTCTACCACCAAATTCTGATAT  
ATCCTTCCTGTCTACATCATACCATAGACACACTCCCTTACGCTGTATCTGTACACTATACTCTAACT  
+  
FFFFFFFFFFFFFFFFFFFFFFFFFFFFFFFFFFFFFFFFFFFFFFFFFFFFF,FFFFFFFFF:FFFFFFFFFFFFFFFFFFFFFFFFFFFFF  
FFFFFFFFFFFFFFFFFFFFFFFFFFFFFFFFFFFFFFFFFFFFFFFFFFFFF:FFFFFFFFFFFFFFFFFFFFFFFFFFFFF:FFFFFFFFF:FFF  
@A00155:342:HHGFNDSXY:1:1216:32777:14951 2:N:0:GAACCTAG+TCCGCATA  
TTCATCTGTATTTACTGTCACCTGTTATATCTTTGGTTATCCTTACTCTACCACCAAATTCTGATATAT  
CCTTCCTGTCTACATCATACCATAGACACACTCCCTTCCGCTGTATCTGTACACTATACTCTAACTTC  
+  
:FFFF:FFFF:FFFFFFFFFFFFFFFFFFFFFFFFF:FFFFFFFFFFFFFFFFFFFFFFFFFFFFF,FFFF,F,FFFFF,FFFFF  
FFFFFFFFF:FFFFFFFFFFFFFFFFFFFFFFFFF:FFFFFFFFF,FFFFFFFFFFFFF,FF:FF::FFFF,,F:FF  
@A00155:342:HHGFNDSXY:1:1216:32533:15060 2:N:0:GAACCTAG+TCCGCATA  
TTCATCTGTATTTACTGTCACCTGTTATATCTTTGGTTATCCTTACTCTACCACCAAATTCTGATATAT  
CCTTCCTGTCTACATCATACCATAGACACACTCCCTTACGCTGTATCTGTACACTATACTCTAACTTC  
+  
FFFFFFFFFFFFFFFFF:FFFFFF:FFFFFF:F:FFFFFFFFFFFFFFFFFFFFFFFFFFFFFFFFFFFFFFFFFFFFFFFFFFFFF  
FFFFFFFFFFFFF:FFFF::FFFFFFFFFFFFFFFFF:FF:,::FFFFFFFFF:FFF:FFFFFF:FFFF:,FFFF  
@A00155:342:HHGFNDSXY:1:2657:13521:4022 2:N:0:GAACCTAG+TCCGCATA  
TTCATCTGTATTTACTGTCACCTGTTATATCTTTGGTTATCCTTACTCTACCACCAAATTCTGATATAT  
CCTTCCTGTCTACATCATACCATAGACACACTCCCTTACGCTGTATCTGTACACTATACTCTAACTTC  
+  
FFFFFFFFFFFFFFFFFFFFFFFFFFFFFFFFFFFFFFFFFFFFFFFFFFFFF:FFFFFFFFFFFFFFFFFFFFFFFFFFFFFFFFFFFFFFFFFFFFF  
FFFFFFFFFFFFFFFFFFFFFFFFFFFFFFFFFFFFFFFFFFFFFFFFFFFFF:FFFFFFFFFFFFFFFFFFFFFFFFFFFFFFFFFFFFFFFFFFFFF  
@A00155:342:HHGFNDSXY:1:2671:4960:21919 1:N:0:GAACCTAG+TCCGCATA  
TCATCTGTATTTACTGTCACCTGTTATATCTTTGGTTATCCTTACTCTACCACCAAATTCTGATATATC  
CTTCCTGTCTACATCATACCATAGACACACTCCCTTACGCTGTATCTGTACACTATACTCTAACTTCT  
+  
FFFFFFFFFFFFFFFFFFFFFFFFFFFFFFFFFFFFFFFFFFFFFFFFFFFFF:FFFFFF:  
FFFFFFFFFFFFFFFFFFFFFFFFFFFFFFFFFFFFFFFFFFFFFFFFFFFFF:FFFFFFFFFFFFFFFFFFFFFFFFFFFFFFFFFFFFF:  
@A00155:342:HHGFNDSXY:1:2621:25138:16564 1:N:0:GAACCTAG+TCCGCATA  
ATCTGTATTTACTGTCACCTGTTATATCTTTGGTTATCCTTACTCTACCACCAAATTCTGATATATCCT  
TCCTGTCTACATCATACCATAGACACACTCCCTTACGCTGTATCTGTACACTATACTCTAACTTCTGG  
+  
FFFFFFFFFFFFFFFFFFFFFFFFFFFFFFFFFFFFFFFFFFFFFFFFFFFFF:FFFFFFFFFFFFFFFFFFFFFFFFFFFFFFFFFFFFFFFFFFFFF  
FFFFFFFFFFFFFFFFFFFFFFFFFFFFFFFFFFFFFFFFFFFFFFFFFFFFF:FFFFFFFFFFFFFFFFFFFFFFFFFFFFFFFFFFFFF:  
@A00155:342:HHGFNDSXY:1:1276:5828:8516 1:N:0:GAACCTAG+TCCGCATA  
TCTGTATTTACTGTCACCTGTTATATCTTTGGTTATCCTTACTCTACCACCAAATTCTGATATATCCTT  
CCTGTCTACATCATACCATAGACACACTCCCTTACGCTGTATCTGTACACTATACTCTAACTTCTGGT  
+  
FFFFFFFFFFFFFFFFFFFFFFFFFFFFFFFFFFFFFFFFFFFFFFFFFFFFF:FF,FFFFFFFFFFFFFFFFFFFFFFFFFFFFFFFFFFFFFFFFFFFFF  
FFFFFFFFFFFFFFFFFFFFFFFFFFFFFFFFFFFFFFFFFFFFFFFFFFFFF:FFFFFFFFFFFFFFFFFFFFFFFFFFFFFFFFFFFFF:  
@A00155:342:HHGFNDSXY:1:2139:7139:27070 1:N:0:GAACCTAG+TCCGCATA  
CTGTATTTACTGTCACCTGTTATATCTTTGGTTATCCTTACTCTACCACCAAATTCTGATATATCCTTC  
CTGTCTACATCATACCATAGACACACTCCCTTACGCTGTATCTGTACACTATACTCTAACTTCTGGT  
+  
FFFFFFFFFFFFFFFFFFFFFFFFFFFFFFFFFFFFFFFFFFFFFFFFFFFFF:FFFFFFFFFFFFFFFFFFFFFFFFFFFFFFFFFFFFF  
FFFFFFFFFFFFFFFFFFFFFFFFFFFFFFFFFFFFFFFFFFFFFFFFFFFFF:FFFFFFFFFFFFFFFFFFFFFFFFFFFFFFFFFFFFF:  
@A00155:342:HHGFNDSXY:1:2139:7139:27070 1:N:0:GAACCTAG+TCCGCATA  
CTGTATTTACTGTCACCTGTTATATCTTTGGTTATCCTTACTCTACCACCAAATTCTGATATATCCTTC  
CTGTCTACATCATACCATAGACACACTCCCTTACGCTGTATCTGTACACTATACTCTAACTTCTGGT  
+

[illegible]



@A00155:342:HHGFNDSXY:1:1550:6081:34882 2:N:0:GAACCTAG+TCCGCATA  
CACTGTTATATCTTTGGTTATCCTTACTCTACCACCAAATTCTGATATATCCTTCCTGTCTACATCAT  
ACCATAGACACACTCCCTTACGCTGTATCTGTACACTATACTCTAACTTCTGGTTAGCGAAG  
+  
FFFFFFFFFFFFFFFFFFFFFFFFFFFFFFFFFFFFFFFFFFFFFFFFFFFFFFFFFFFFFFFFFFFFFFFF  
FFFFFFFFFFFFFFFFFFFFFFFFFFFFFFFFFFFFFFFFFFFFFFFFFFFFFFFFFFFFFFFFFFFFFFFF  
@A00155:342:HHGFNDSXY:1:2529:2483:14403 1:N:0:GAACCTAG+TCCGCATA  
CTGTTATATCTTTGGTTATCCTTACTCTACCACCAAATTCTGATATATCCTTCCTGTCTACATCATAC  
CATAGACACACTCCCTTACGCTGTATCTGTACACTATACTCTAACTTCTGGTTAGCGAAGAACTTATT  
+  
FFFFFFFFF:FFFFFFFFFFFFFFFFFFFFFFFFFFFFFFFFFFFFFFFFFFFFFFFFFFFFFFFFFFFF  
FFFFFFFFFFFFFFFFFFFFFFFFFFFFFFFFFFFFFFFFFFFFFFFFFFFFFFFFFFFFFFFFFFFFFFFF  
@A00155:342:HHGFNDSXY:1:2624:7726:9956 1:N:0:GAACCTAG+TCCGCATA  
CTGTTATATCTTTGGTTATCCTTACTCTACCACCAAATTCTGATATATCCTTCCTGTCTACATCATAC  
CATAGACACACTCCCTTACGCTGTATCTGTACACTATACTCTAACTTCTGGTTAGCGAAGAACTTATT  
+  
FF::FFF:FFFFFFFFFFFF::FFF,FF::F,:FFF:F:FFFFFFFFFFFFFFFF,FFFFFFFFFFFF  
,F:FFFF,F:FFF,FFFF,FFFFFFFFFFFFFFFF,FFFFFF:FFF,FFFFFFFF,FF:,FFFF,FF  
@A00155:342:HHGFNDSXY:1:1507:11812:5196 2:N:0:GAACCTAG+TCCGCATA  
TATCTTTGGTTATCCTTACTCTACCACCAAATTCTGATATATCCTTCCTGTCTACATCATACCATAGA  
CACACTCCCTTACGCTGTATCTGTACACTATACTCTAACTTCTGGTTAGCGAAGAACTTATTGTGTAA  
+  
FFFFFFFFFFFFFFFFFFFFFFFFFFFFFFFFFFFFFFFFFFFFFFFFFFFFFFFFFFFFFFFFFFFFFFFF  
FFFFFFFFFFFFFFFFFFFFFFFFFFFFFFFFFFFFFFFFFFFFFFFFFFFFFFFFFFFFFFFFFFFFFFFF  
@A00155:342:HHGFNDSXY:1:1637:21802:11537 1:N:0:GAACCTAG+TCCGCATA  
TTTGGTTATCCTTACTCTACCACCAAATTCTGATATATCCTTCCTGTCTACATCATACCATAGACACA  
CTCCCTTACGCTGTATCTGTACACTATACTCTAACTTCTGGTTAGCGAAGAACTTATTGTGTAACGGC  
+  
F:FFFFFFFFFFFFFF,FFFFFFFFFFFF,FFFFFFFFFFFFFF:FFFF:FFFF,FF,FFFF,:FFFF  
FFF:FF:FFF::FFFFFFFFFFFFFFFF:FF:FF,FFFF:FF:FFF:FFF:F,,:FFFFFFFFFFFF,F  
@A00155:342:HHGFNDSXY:1:1649:6976:24220 2:N:0:GAACCTAG+TCCGCATA  
TTGGTTATCCTTACTCTACCACCAAATTCTGATATATCCTTCCTGTCTACATCATACCATAGACACAC  
TCCCTTACGCTGTATCTGTACACTATACTCTAACTTCTGGTTAGCGAAGAACTTATTGTGTAACGGCG  
+  
F:F:FFFFFFFFFFFFFFFFFFFFFFFF:F:FFFFFFFFFFFFFFFFFFFFFFFF:FFFFFFFF,,FF,:FFFF  
FFFFFFFFFFFFFFFFFFFFFFFFFFFFFFFF:F:FFFFFF:FFFFFFFFFFFFFFFFFFFFFFFF,FFFFFFFF  
@A00155:342:HHGFNDSXY:1:1550:6081:34882 1:N:0:GAACCTAG+TCCGCATA  
GGTTATCCTTACTCTACCACCAAATTCTGATATATCCTTCCTGTCTACATCATACCATAGACACACTC  
CCTTACGCTGTATCTGTACACTATACTCTAACTTCTGGTTAGCGAAGAACTTATTGTGTAAC  
+  
FFFFFFFFFFFFFFFFFFFFFFFFFFFFFFFFFFFFFFFFFFFFFFFFFFFFFFFFFFFFFFFFFFFFFFFF  
FFFFFFFFFFFFFFFFFFFFFFFFFFFFFFFFFFFFFFFF,FFF,FFFFFFFFFFFFFFFF:FFFFFFFFFFFF  
@A00155:342:HHGFNDSXY:1:1670:12635:20744 1:N:0:GAACCTAG+TCCGCATA  
GGTTATCCTTACTCTACCACCAAATTCTGATATATCCTTCCTGTCTACATCATACCATAGACACACTC  
CCTTACGCTGTATCTGTACACTATACTCTAACTTCTGGTTAGCGAAGAACTTATTGTGTAAC  
+  
FFFFFFFFFFFFFFFFFFFFFFFFFFFFFFFFFFFFFFFFFFFFFFFFFFFFFFFFFFFFFFFFFFFFFFFF  
FFFFFFFFFFFFFFFFFFFFFFFFFFFFFFFFFFFFFFFFFFFFFFFFFFFFFFFFFFFFFFFFFFFFFFFF  
@A00155:342:HHGFNDSXY:1:1554:6162:9846 2:N:0:GAACCTAG+TCCGCATA  
GTGATCCTTACTCTACCACCAAATTCTGATATATCCTTCCTGTCTACATCATACCATAGACACACTCC  
CTTACGCTGTATCTGTACACTATACTCTAACTTCTGGTTAGCGAAGAACTTATTGTGTAACGGCGT  
+  
FF,FF,FFFFFFFFFFFFFFFF:FFFF,FFFFFFFF:FFFF:FFFFFFFFFFFFFFFFFFFFFFFF:F:FFFFF:  
:FFF,F,FFFFFF,FFFFFFFFFFFFFFFF,:FFFFFFFFFFFFFFFF:FFFF::FFFF,F,FF,F

@A00155:342:HHGFNDSXY:1:2529:14403 2:N:0:GAACCTAG+TCCGCATA  
 ATCCTTACTCTACCACCAAATTCTGATATATCCTTCCTGTCTACATCATACCATAGACACACTCCCTT  
 ACGCTGTATCTGTACACTATACTCTAACTTCTGGTTAGCGAAGAACTTATTGTGTAACGGCGGTAGCT  
 +  
 FFFFFFFFFFFFFFFFFFFFFFFFFFFFFFFFFF:FFFFFFFFFFFFFFFFFFFFFFFFFFFFFFFF:FFFFFFFFFFFFFFFFFFFF  
 ,FFFFFFFF,FFFFFFFF:FFFFFFFF:FFFFFFFFFFFFFFFFFFFFFFFFFFFFFFFFFFFFFFFFFFFFFFFF  
 @A00155:342:HHGFNDSXY:1:1574:1913:9909 2:N:0:GAACCTAG+TCCGCATA  
 CCTTACTCTACCACCAAATTCTGATATATCCTTCCTGTCTACATCATACCATAGACACACTCCCTTAC  
 GCTGTATCTGTACACTATACTCTAACTTCTGGTTAGCGAAGAACTTATTGTGTAACGGCG  
 +  
 FF:FFFFF::FFFFFFFF,F:FFFFFFFF:FFFFFFFFFFFFFFFFFFFFFFFFFFFFFFFFFFFFFFFF:FFF:F,F,F  
 FFFFFFFFFFFFFFFFFFFFFFFFFFFFFFFFFF:FFFFFFFFFFFFFFFFFFFFFFFFFFFFFFFF:FFF:FFFFFFFF  
 @A00155:342:HHGFNDSXY:1:1445:26015:35556 2:N:0:GAACCTAG+TCCGCATA  
 CCTTACTCTACCACCAAATTCTGATATATCCTTCCTGTCTACATCATACCATAGACACACTCCCTTAC  
 GCTGTATCTGTACACTATACTCTAACTTCTGGTTAGCGAAGAACTTATTGTGTAACGGCG  
 +  
 FFFFFFFFFFFFFFFFFF:FFF,FFFFFFFFFFFFF:FFFFF:FF,F:FFFFFFFFF,FFFFFFFF:FFFFF:FF  
 FFFFFFFFFFFFFFFFFFFFFFFFFF:FFFFF,F,FFFFFFFFFFFFFFFFFFFFFFFFFFFFFFFFFFFFFFFF  
 @A00155:342:HHGFNDSXY:1:1150:28239:34961 2:N:0:GAACCTAG+TCCGCATA  
 CCTTACTCTACCACCAAATTCTGATATATCCTTCCTGTCTACATCATACCATAGACACACTCCCTTAC  
 GCTGTATCTGTACACTATACTCTAACTTCTGGTTAGCGAAGAACTTATTGTGTAACGGCGGTAGCTGT  
 +  
 FFFFFFFFFFFFFFFFFF,F,FFFFFFFFF,FFFF:FFFFFFFFFFFFFFFFFFFF:FFFFFFFFFFFFFFFFFFFF:F,F  
 FFFFFFFFFFFFFFFFFFFFFFFFFF:FFFFF:FFFFFFFFFFFFFFFFFFFF:FFFFFFFFFFFFFFFFFFFF  
 @A00155:342:HHGFNDSXY:1:1234:32443:35289 2:N:0:GAACCTAG+TCCGCATA  
 CCTTACTCTACCACCAAATTCTGATATATCCTTCCTGTCTACATCATACCATAGACACACTCCCTTAC  
 GCTGTATCTGTACACTATACTCTAACTTCTGGTTAGCGAAGAACTTATTGTGTAACGGCGGTAGCTGT  
 +  
 FFFFFFFFF:FFF:FFFFFFFFFFFF:FFFFFFFFFFFFF:FFFFFFFFFFFFFFFFFFFF:FFFFFFFF:FFFFF:FF  
 FFFFFFFFFFFFFFFFFFFFF:F::FFFFFFFFFFFFF:FFFFFFFFFFFFF:FFF:F:FFFFFFFFFFFFFFFFFFFF  
 @A00155:342:HHGFNDSXY:1:2278:3848:19711 2:N:0:GAACCTAG+TCCGCATA  
 CCTTACTCTACCACCAAATTCTGATATATCCTTCCTGTCTACATCATACCATAGACACACTCCCTTAC  
 GCTGTATCTGTACACTATACTCTAACTTCTGGTTAGCGAAGAACTTATTGTGTAACGGCGGTAGCTGT  
 +  
 FFFFFFFFF:FFFFFFFFF,FFFFF,FF:FFFFFFFFFFFFFFFFFFFFFFFFFFFFFFFF,FFFFFF:FFFFF:FFF  
 FFFFFFFFFFFFFFFFFFFFF:FFFFFFFFFFFFFFFFFFFFFFFFFFFFFFFFFFFFFFFFFFFFFFFFFFFFFFFF  
 @A00155:342:HHGFNDSXY:1:1649:6976:24220 1:N:0:GAACCTAG+TCCGCATA  
 CTTACTCTACCACCAAATTCTGATATATCCTTCCTGTCTACATCATACCATAGACACACTCCCTTACG  
 CTGTATCTGTACACTATACTCTAACTTCTGGTTAGCGAAGAACTTATTGTGTAACGGCGGTAGCTGTA  
 +  
 FFFFFFFFFFFFFFFFFFFFFFFFFF:FFFFFFFFFFFFFFFFFFFFFFFFFFFFFFFFFFFFFFFFFFFFFFFFFFFF  
 FFFFFFFFFFFFFFFFFFFFFFFFFF:FFFFFFFFFFFF:FFFFFFFFFFFFFFFFFFFFFFFFFFFFFFFFFFFF  
 @A00155:342:HHGFNDSXY:1:1574:1913:9909 1:N:0:GAACCTAG+TCCGCATA  
 AAATTCTGATATATCCTTCCTGTCTACATCATACCATAGACACACTCCCTTACGCTGTATCTGTACAC  
 TATACTCTAACTTCTGGTTAGCGAAGAACTTATTGTGTAACGGCGGTAGCTGTATGAATA  
 +  
 FFFFFFFFFFFFFFFFFFFFFFFFFFFFFFFFFF,FFFFFFFFFFFFFFFFFFFFFFFFFFFFFFFFFFFFFFFF  
 FFF:FFFFFFFFFFFFFFFFFFFFFFFFF:FFFFFFFFFFFFF:FFFFFFFFFFFFFFFFFFFFF  
 @A00155:342:HHGFNDSXY:1:1445:26015:35556 1:N:0:GAACCTAG+TCCGCATA  
 AAATTCTGATATATCCTTCCTGTCTACATCATACCATAGACACACTCCCTTACGCTGTATCTGTACAC  
 TATACTCTAACTTCTGGTTAGCGAAGAACTTATTGTGTAACGGCGGTAGCTGTATGAATA  
 +  
 FFFFFFFFFFFFFFFFFFFFFFFFFFFFFFFFFF:FFFFFFFFFFFFFFFFFFFFFFFFFFFFFFFFFFFFFFFFFFFF  
 FFFFFFFFFFFFFFFFFFFFFFFFFF:FFFFFFFFFFFFFFFFFFFFF

@A00155:342:HHGFNDSXY:1:2278:3848:19711 1:N:0:GAACCTAG+TCCGCATA  
AAATTCTGATATATCCTTCCTGTCTACATCATACCATAGACACACTCCCTTACGCTGTATCTGTACAC  
TATACTCTAACTTCTGGTTAGCGAAGAACTTATTGTGTAACGGCGGTAGCTGTATGAATACACGCGAC  
+  
FFFFFFFFFFFFFFFFFFFFFFFFFFFFFFFFFFFFFFFFFFFFFFFFFFFFFFFFFFFFFFFFFFFFFFFF  
FFFFFFFFFFFFFFFFFFFFFFFFFFFFFFFFFFFFFFFFFFFFFFFFFFFFFFFFFFFFFFFFFFFFFFFF:FFF  
@A00155:342:HHGFNDSXY:1:2672:31259:28635 1:N:0:GAACCTAG+TCCGCATA  
AAATTCTGATATATCCTTCCTGTCTACATCATACCATAGACACACTCCCTTACGCTGTATCTGTACAC  
TATACTCTAACTTCTGGTTAGCGAAGAACTTATTGTGTAACGGCGGTAGCTGTATGAATACACGCGAC  
+  
FFFFFFFFF:FFFFFFFFFFFFFFFFFFFFFFFFFFFFFFFFFFFFFFFFFFFFFFFFFFFFFFFFFFFFF  
FFFFFFFFFFFFFFFFFFFFFFFFFFFFFFFFFFFFFFFFFFFFFFFFFFFFFFFFFFFFFFFFFFFFFFFF  
@A00155:342:HHGFNDSXY:1:1637:21802:11537 2:N:0:GAACCTAG+TCCGCATA  
AAATTCTGATATATCCTTCCTGTCTACATCATACCATAGACACACTCCCTTACGCTGTATCTGTACAC  
TATACTCTAACTTCTGGTTAGCGAAGAACTTATTGTGTAACGGCGGTAGCTGTATGAATACACGCGAC  
+  
FFFFFFFFFFFFFFFFFFFFFFFFFFFFFFFFFFFFFFFFFFFFFFFFFFFFFFFFFFFFFFFFFFFFFFFF  
F,F:FFF:,FFFFFFFFFFFFFFFFFFFFFFFFFFFFFFFFFFFFFFFFFFFFFFFFFFFFFFFFFFFFF  
@A00155:342:HHGFNDSXY:1:1105:7129:29559 1:N:0:GAACCTAG+TCCGCATA  
AAATTCTGATATATCCTTCCTGTCTACATCATACCATAGACACACTCCCTTACGCTGTATCTGTACAC  
TATACTCTAACTTCTGGTTAGCGAAGAACTTATTGTGTAACGGCGGTAGCTGTATGAATACACGCGAC  
+  
FFFFFFFFFFFFFFFFFFFFFFFFFFFFFFFFFFFFFFFFFFFFFFFFFFFFFFFFFFFFFFFFFFFFFFFF  
FFFFFFFFFFFFFFFFFFFFFFFFFFFFFFFFFFFFFFFFFFFFFFFFFFFFFFFFFFFFFFFFFFFFFFFF:FFFF  
@A00155:342:HHGFNDSXY:1:1227:24994:2722 1:N:0:GAACCTAG+TCCGCATA  
AAATTCTGATATATCCTTCCTGTCTACATCATACCATAGACACACTCCCTTACGCTGTATCTGTACAC  
TATACTCTAACTTCTGGTTAGCGAAGAACTTATTGTGTAACGGCGGTAGCTGTATGAATACACGCGAC  
+  
FFFFFFFFFFFFFFFFFFFFFFFFFFFFFFFFFFFFFFFFFFFFFFFFFFFFFFFFFFFFFFFFFFFFFFFF  
FFFFFFFFFFFFFFFFFFFFFFFFFFFFFFFFFFFFFFFFFFFFFFFFFFFFFFFFFFFFFFFFFFFFFFFF  
@A00155:342:HHGFNDSXY:1:1150:28239:34961 1:N:0:GAACCTAG+TCCGCATA  
AAATTCTGATATATCCTTCCTGTCTACATCATACCATAGACACACTCCCTTACGCTGTATCTGTACAC  
TATACTCTAACTTCTGGTTAGCGAAGAACTTATTGTGTAACGGCGGTAGCTGTATGAATACACGCGAC  
+  
FFFFFFFFFFFFFFFFFFFFFFFFFFFFFFFFFFFFFFFFFFFFFFFFFFFFFFFFFFFFFFFFFFFFFFFF:  
FFFFFFFFFFFFFFFFFFFFFFFFFFFFFFFFFFFFFFFFFFFFFFFFFFFFFFFFFFFFFFFFFFFFFFFF:  
@A00155:342:HHGFNDSXY:1:2654:10248:31704 1:N:0:GAACCTAG+TCCGCATA  
AAATTCTGATATATCCTTCCTGTCTACATCATACCATAGACACACTCCCTTACGCTGTATCTGTACAC  
TATACTCTAACTTCTGGTTAGCGAAGAACTTATTGTGTAACGGCGGTAGCTGTATGAATACACGCGAC  
+  
FFFFFFFFFFFFFFFFFFFFFFFFFFFFFFFFFFFFFFFFFFFFFFFFFFFFFFFFFFFFFFFFFFFFFFFF:  
FFFFFFFFFFFFFFFFFFFFFFFFFFFFFFFFFFFFFFFFFFFFFFFFFFFFFFFFFFFFFFFFFFFFFFFF  
@A00155:342:HHGFNDSXY:1:1265:25437:35336 2:N:0:GAACCTAG+TCCGCATA  
ATTCTGATATATCCTTCCTGTCTACATCATACCATAGACACACTCCCTTACGCTGTATCTGTACACTA  
TACTCTAACTTCTGGTTAGCGAAGAACTTATTGTGTAACGGCGGTAGCTGTATGAATACACGCGACCT  
+  
FFFFFFFFFFFFFFFFFFFFFFFFFFFFFFFFFFFFFFFFFFFFFFFFFFFFFFFFFFFFFFFFFFFFFFFF:  
FFFFFFFFF:FFFFFFFFF:FFFFFFFFFFFFFFFFFFFFFFFFFFFFFFFFF:FF:F:FFFFF  
FFFFFFFFF:F:FFFFFFFFF,FFFFFFFFFFFFFFFFF:,FFFFFFFFF:FFFFFFFFFFFFFFFFFFFFFFFF  
@A00155:342:HHGFNDSXY:1:1408:25672:1329 2:N:0:GAACCTAG+TCCGCATA  
TTCTGATATATCCTTCCTGTCTACATCATACCATAGACACACTCCCTTACGCTGTATCTGTACACTAT  
ACTCTAACTTCTGGTTAGCGAAGAACTTATTGTGTAACGGCGGTAGCTGTATGAATACACGCGACCTC  
+  
FFFFFFFFFFFFFFFFFFFFFFFFFFFFFFFFFFFFFFFFFFFFFFFFFFFFFFFFFFFFFFFFFFFFFFFF:  
FFFFFFFFF:FFFFFFFFF:F:FFFFFFFFFFFFFFFFFFFFFFFFFFFFFFFFFFFFFFFFFFFFFFFFFFFFF

@A00155:342:HHGFNDSXY:1:1408:25355:1094 2:N:0:GAACCTAG+TCCGCATA  
TTCTGATATATCCTTCCTGTCTACATCATACCATAGACACACTCCCTTACGCTGTATCTGTACACTAT  
ACTCTAACTTCTGGTTAGCGAAGAACTTATTGTGTAACGGCGGTAGCTGTATGAATACACGCGACCTC  
+  
FFFFFFFF:FFFFFFFFFFFFFFFFFFFFFFFFFFFFFFFFFFFFFFFFFFFFFFFFFFFFFFFFFFFFFFFF:  
FFFFFFFF:F:FFFFFFFFFFFFFFFFFFFFFFFFFFFFFFFFFFFFFFFFFFFFFFFFFFFFFFFFFFFFFFFF  
@A00155:342:HHGFNDSXY:1:1622:17183:27806 1:N:0:GAACCTAG+TCCGCATA  
GATATATCCTTCCTGTCTACATCATACCATAGACACACTCCCTTACGCTGTATCTGTACACTATACTC  
TAACTTCTGGTTAGCGAAGAACTTATTGTGTAACGGCGGTAGCTGTATGAATACACGCGACCTCTCCG  
+  
FFFFFFFFFFFFFFFFFFFFFFFFFFFFFFFFFFFFFFFFFFFFFFFFFFFFFFFFFFFFFFFFFFFFFFFFFFFF  
FFFF,FFFFFFFFFFFFFFFFFFFFFFFFFFFFFFFFFFFFFFFFFFFFFFFFFFFFFFFFFFFFFFFFFFFF:  
@A00155:342:HHGFNDSXY:1:2624:7726:9956 2:N:0:GAACCTAG+TCCGCATA  
ATATCCTTCCTGTCTACATCATACCATAGACACACTCCCTTACGCTGTATCTGTACACTATACTCTAA  
CTTCTGGTTAGCGAAGAACTTATTGTGTAACGGCGGTAGCTGTATGAATACACGCGACCTCTCCGTCG  
+  
FFFF,FFF,FFFF:FFFF,FFF:,FF:FFFFFFFF,,FFF:, :FFFF:FFFF::FF:FFF,FF:  
:FF:FF,FFF:F,:F:FF:FFFFFFFF,FFF:, ,FFFFFFFFFFFFFFFF:FFFF::FF:F:FFFFFF:  
@A00155:342:HHGFNDSXY:1:1107:31521:11021 1:N:0:GAACCTAG+TCCGCATA  
TATCCTTCCTGTCTACATCATACCATAGACACACTCCCTTACGCTGTATCTGTACACTATACTCTAAC  
TTCTGGTTAGCGAAGAACTTATTGTGTAACGGCGGTAGCTGTATGAATACACGCGACCTCTCCGTCGT  
+  
FFFFFFFFFFFFFFFFFFFFFFFFFFFFFFFFFFFFFFFFFFFFFFFFFFFFFFFFFFFFFFFFFFFFFFFFFFFF  
,FFFFFFFFFFFFFFFFFFFFFFFFFFFFFFFFFFFFFFFFFFFFFFFFFFFFFFFFFFFFFFFFFFFFFFFFFFFF  
@A00155:342:HHGFNDSXY:1:2621:25138:16564 2:N:0:GAACCTAG+TCCGCATA  
TATCCTTCCTGTCTACATCATACCATAGACACACTCCCTTACGCTGTATCTGTACACTATACTCTAAC  
TTCTGGTTAGCGAAGAACTTATTGTGTAACGGCGGTAGCTGTATGAATACACGCGACCTCTCCGTCGT  
+  
FFFFFFFFFFFFFFFFFFFFFFFFFFFFFFFFFFFFFFFFFFFFFFFFFFFFFFFFFFFFFFFFFFFFFFFFFFFF  
FFFFFFFFFFFFFFFFFFFFFFFFFFFFFFFFFFFFFFFFFFFFFFFFFFFFFFFFFFFFFFFFFFFFFFFFFFFF  
@A00155:342:HHGFNDSXY:1:1116:9842:1877 1:N:0:GAACCTAG+TCCGCATA  
TATCCTTCCTGTCTACATCATACCATAGACACACTCCCTTACGCTGTATCTGTACACTATACTCTAAC  
TTCTGGTTAGCGAAGAACTTATTGTGTAACGGCGGTAGCTGTATGAATAACGCGACCTCTCCGTCGT  
+  
FFFFF:F:FFFFFF,FFFFFFFFFFFFFFFFFFFFFFFFFFFFFFFFFFFFFFFFFFFFFFFFFFFFFFFFFFFF  
FFFF,FFFFFF,FFF,FFFFFFFFFFFFFFFFFFFFFFFFFFFFFFFFFFFFFFFFFFFFFFFFFFFFFFFFFFFF  
@A00155:342:HHGFNDSXY:1:1512:30617:10081 2:N:0:GAACCTAG+TCCGCATA  
CCTTCCTGTCTACATCATACCATAGACACACTCCCTTACGCTGTATCTGTACACTATACTCTAACTTC  
TGGTTAGCGAAGAACTTATTGTGTAACGGCGGTAGCTGTATGAATACACGCGACCTCTCCGTCGTAGA  
+  
FFFFFFFFFFFFFFFFFFFFFFFFFFFFFFFFFFFFFFFFFFFFFFFFFFFFFFFFFFFFFFFFFFFFFFFFFFFF  
FF:FFFFFFFFFFFFFFFF:FFFF:F,FFFFFFFFFFFFFFFFFFFFFFFFFFFFFFFFFFFFFFFFFFFFFFFFFFFF  
@A00155:342:HHGFNDSXY:1:1276:5828:8516 2:N:0:GAACCTAG+TCCGCATA  
TCCTGTCTACATCATACCATAGACACACTCCCTTACGCTGTATCTGTACACTATACTCTAACTTCTGG  
TTAGCGAAGAACTTATTGTGTAACGGCGGTAGCTGTATGAATACACGCGACCTCTCCGTCGTAGACGT  
+  
FFFFFFFFFFFFFFFFFFFFFFFFFFFFFFFFFFFFFFFFFFFFFFFFFFFFFFFFFFFFFFFFFFFFFFFFFFFF  
FFFFFFFFFFFFFFFFFFFFFFFFFFFFFFFFFFFFFFFFFFFFFFFFFFFFFFFFFFFFFFFFFFFFFFFFFFFF  
@A00155:342:HHGFNDSXY:1:1226:32940:7122 1:N:0:GAACCTAG+TCCGCATA  
CCTGTCTACATCATACCATAGACACACTCCCTTACGCTGTATCTGTACACTATACTCTAACTTCTGGT  
TAGCGAAGAACTTATTGTGTAACGGCGGTAGCTGTATGAATACACGCGACCTCTCCGTCGTAGACGTG  
+  
FFFFFFFFFFFFFFFFFFFFFFFFFFFFFFFFFFFFFFFFFFFFFFFFFFFFFFFFFFFFFFFFFFFFFFFFFFFF  
::FFFFFFFFFFFFFFFF:FFF:FFFFFFFFFFFFFFFFFFFFFFFFFFFFFFFFFFFFFFFFFFFFFFFFFFFF

[illegible]

$+$ 

+

+

+

+

+

+

+

+

[illegible]

[illegible]

@A00155:342:HHGFNDSXY:1:1226:32940:7122 2:N:0:GAACCTAG+TCCGCATA  
CTGTACACTATACTCTAACTTCTGGTTAGCGAAGAACTTATTGTGTAACGGCGGTAGCTGTATGAATA  
CACGCGACCTCTCCGTCGTAGACGTGATGGTCATGTCTTCATCTTGCTCTTCAGGTGCATTTAACTG  
+  
FFF:F:FFFFFFFFF::FFFFFFFFFFFFFF:FFFFFFFF:FFFFFFFFFFFFFFF:FFFFFFFF,,F  
FFFFFFFF:FF:FFFFFFFFFFFFFFFFFFFFFFFFFFFFFFFFFFFFFFFF:FFFFFFFFFFFFFFFF:FFFFF,  
@A00155:342:HHGFNDSXY:1:2413:26512:27430 1:N:0:GAACCTAG+TCCGCATA  
TGTACACTATACTCTAACTTCTGGTTAGCGAAGAACTTATTGTGTAACGGCGGTAGCTGTATGAATAC  
ACGCGACCTCTCCGTCGTAGACGTGATGGTCATGTCTTCATCTTGCTCTTCAGGTGCATTTAACTG  
+  
FFFFFFFFFFFFFFFFFFFFFFFFFFFFFFFFFFFFFFFF:FFFFFFFFFFFFFFFFFFFFFFFFFFFFFFFF  
FFFFFFFFFFFFFF:FFFFFFFFFFFFFFFFFFFFFFFFFFFFFFFFFFFFFFFFFFFFFFFFFFFFFFFF  
@A00155:342:HHGFNDSXY:1:2413:25988:30123 1:N:0:GAACCTAG+TCCGCATA  
TGTACACTATACTCTAACTTCTGGTTAGCGAAGAACTTATTGTGTAACGGCGGTAGCTGTATGAATAC  
ACGCGACCTCTCCGTCGTAGACGTGATGGTCATGTCTTCATCTTGCTCTTCAGGTGCATTTAACTG  
+  
FFFFFFFFFFFFFFFFFFFFFFFFFFFFFFFFFFFFFFFF:FFFFFFFFFFFFFFFFFFFFFFFFFFFFFFFF  
FFFFFFFFFFFFFFFFFFFFFFFFFFFFFFFFFFFFFFFFFFFFFFFFFFFFFFFFFFFFFFFFFFFFFFFF  
@A00155:342:HHGFNDSXY:1:1432:30038:12868 1:N:0:GAACCTAG+TCCGCATA  
TACACTATACTCTAACTTCTGGTTAGCGAAGAACTTATTGTGTAACGGCGGTAGCTGTATGAATACAC  
GCGACCTCTCCGTCGTAGACGTGATGGTCATGTCTTCATCTTGCTCTTCAGGTGCATTTAACTGGC  
+  
FFFFF:FFFFFFFFFFFFFFFFFFFFFFFFFFFFFFFFFFFFFFFFFFFFFFFFFFFFFFFFFFFFFFFF  
FFFFFFFFFFFFFFFFFFFFFFFFFFFFFFFFFFFFFFFFFFFFFFFFFFFFFFFFFFFFFFFFFFFFFFFF  
@A00155:342:HHGFNDSXY:1:1439:29080:21512 1:N:0:GAACCTAG+TCCGCATA  
TACACTATACTCTAACTTCTGGTTAGCGAAGAACTTATTGTGTAACGGCGGTAGCTGTATGAATACAC  
GCGACCTCTCCGTCGTAGACGTGATGGTCATGTCTTCATCTTGCTCTTCAGGTGCATTTAACTGGC  
+  
FFFFFFFFFFFFFFFFFFFF:FFFFFFFFFFFFFF:FFFFFFFFFFFFFFFFFFFFFFFFFFFFFFFFFFFF  
FFFFFFFFFFFFFFFFFFFFFFFFFFFFFFFFFFFFFFFF:FFFFFFFFF:FFFFF:FFFFF:FFFFFFFF  
@A00155:342:HHGFNDSXY:1:1428:15817:9189 2:N:0:GAACCTAG+TCCGCATA  
TACACTATACTCTAACTTCTGGTTAGCGAAGAACTTATTGTGTAACGGCGGTAGCTGTATGAATACAC  
GCGACCTCTCCGTCGTAGACGTGATGGTCATGTCTTCATCTTGCTCTTCAGGTGCATTTAACTGGC  
+  
FFFFFFFFFFFFFFFFFFFFFFFFFFFFFFFF:FF:FFFFFFFFFFFFFFFFFFFFFFFFFFFFFFFFFFFF  
FFFFFFFFFFFFFFFFFFFFFFFFFFFFFFFFFFFFFFFF:FFFFFFFFFFFF:FFFFFFFFFFFFFFFFFFFF  
@A00155:342:HHGFNDSXY:1:1116:9842:1877 2:N:0:GAACCTAG+TCCGCATA  
CACTATACTCTAACTTCTGGTTAGCGAAGAACTTATTGTTAACGGCGGTAGCTGTATGAATACACGC  
GACCTCTCCGTCGTAGACGTGATGGTCATGTCTTCATCTTGCTCTTCAGGTGCATTTAACTGGCCA  
+  
FFFFFFFFFFFFFFFFFFFFF:, :FFFFFFFFFFFFFFFFFFFFF,F:FFFFFFFFFFFFFFFFFFFFF,FFFF  
FFFFFFFFFFFF:FF:FFFFFFFFFFFF:FFFF:FF:FFFFFFFFFFFFFFFFFFFFFFFFFFFFFFFFFFFF  
@A00155:342:HHGFNDSXY:1:1428:15817:9189 1:N:0:GAACCTAG+TCCGCATA  
CTCTAACTTCTGGTTAGCGAAGAACTTATTGTGTAACGGCGGTAGCTGTATGAATACACGCGACCTCT  
CCGTCGTAGACGTGATGGTCATGTCTTCATCTTGCTCTTCAGGTGCATTTAACTGGCCACACCATA  
+  
FFFFF:::FFFFFFFFFFFFFFFFFFFFF:FFFFFFFFF:FFFFFFFFF:FFFFFFFFFFFFFFFFFFFF  
FFFFFFFFFFFFFFFFFFFF:FFFFFFFFFFFFFFFFFFFFFFFFFFFFFFFFFFFFFFFFFFFF:FFFFF:F  
@A00155:342:HHGFNDSXY:1:1421:32606:27430 1:N:0:GAACCTAG+TCCGCATA  
ACTTCTGGTTAGCGAAGAACTTATTGTGTAACGGCGGTAGCTGTATGAATACACGCGACCTCTCCGTC  
GTAGACGTGATGGTCATGTCTTCATCTTGCTCTTCAGGTGCATTTAACTGGCCACACCATATTGAC  
+  
FFFFFFFFFFFFFFFFFFFFF:FFFFFFFFF:FFFFFFFFF:FFFFFFFFF,FFFFFFFFFFFFFFFFFFFF  
FFFFFFFFFFFFFFFFFFFFF:FFFFF:FFFFFFFFFFFF:FFFFFFFFFFFF:FFFFF,FFFFF



```
CTTCTGGTTAGCGAAGAAGAACTTATTGTGTAACGGCGGTAGCTGTATGAATACACGCGACCTCTCCGTCG  
TAGACGTGATGGTCATGTCTTCATCTTGCTCTTCAGGTGCATTAACTACTGGCCACACCATATTGACG  
+  
FFFFFFFFFFFFFFFFFFFFFFFFFFFFF:FFFFFFFFFFFFFFFFFFFFFFFFFFFFFFFFFFFFFFFFFFFFFFF  
FFFFFFFFFFFFFFFFFFFFFFFFFFFFFFFFFFFFFFFFFFFFFFFFFFFFFFFFFFFFFFFFFFFFFFFFFFFFF  
@A00155:342:HHGFNDSXY:1:1424:12373:11929 1:N:0:GAACCTAG+TCCGCATA  
TTCTGGTTAGCGAAGAAGAACTTATTGTGTAACGGCGGTAGCTGTATGAATACACGCGACCTCTCCGTCGT  
AGACGTGATGGTCATGTCTTCATCTTGCTCTTCAGGTGCATTAACTACTGGCCACACCAGATTGACGT  
+  
FFFFFFFFFFFFFFFFFFFFFFFFFFFFFFFFFFFFFFFFFFFFFFFFFFFFFFFFFFFFFFFFFFFFFFFFFFFFF  
FFFFFFFFFFFFFFFFFFFFFFFFFFFFFFFFFFFFFFFFFFFFFFFFFFFFFFFFFFFFFFFFFFFFFFFFFFFFF, FFFFFFFF  
@A00155:342:HHGFNDSXY:1:1659:8874:33019 1:N:0:GAACCTAG+TCCGCATA  
TGGTTAGCGAAGAAGAACTTATTGTGTAACGGCGGTAGCTGTATGAATACACGCGACCTCTCCGTCGTAGA  
CGTGATGGTCATGTCTTCATCTTGCTCTTCAGGTGCATTAACTACTGGCCACACCATATTGACGTCGT  
+  
FFFFFFFFFFFFFFFFFFFFFFFFFFFFFFFFFFFFFFFFFFFFFFFFFFFFFFFFFFFFFFFFFFFFFFFFFFFFF  
FFFFFFFFFFFFFFFFFFFFFFFFFFFFFFFFFFFFFFFFFFFFFFFFFFFFFFFFFFFFFFFFFFFFFFFFFFFFF, FFFFFFFF  
@A00155:342:HHGFNDSXY:1:1615:27679:9784 1:N:0:GAACCTAG+TCCGCATA  
TGGTTAGCGAAGAAGAACTTATTGTGTAACGGCGGTAGCTGTATGAATACACGCGACCTCTCCGTCGTAGA  
CGTGATGGTCATGTCTTCATCTTGCTCTTCAGGTGCATTAACTACTGGCCACACCATATTGACGTCGT  
+  
FFFFFFFFFFFFFFFFFFFFFFFFFFFFFFFFFFFFFFFFFFFFFFFFFFFFFFFFFFFFFFFFFFFFFFFFFFFFF  
FFFFFFFFFFFFFFFFFFFFFFFFFFFFFFFFFFFFFFFFFFFFFFFFFFFFFFFFFFFFFFFFFFFFFFFFFFFFF, FFFFFFFF  
@A00155:342:HHGFNDSXY:1:1357:7337:29418 2:N:0:GAACCTAG+TCCGCATA  
GGTTAGCGAAGAAGAACTTATTGTGTAACGGCGGTAGCTGTATGAATACACGCGACCTCTCCGTCGTAGAC  
GTGATGGTCATGTCTTCATCTTGCTCTTCAGGTGCATTAACTACTGGCCACACCATATTG  
+  
FFFFFFFFFFFFFFFFFFFFFFFFFFFFFFFFFFFFFFFFFFFFFFFFFFFFFFFFFFFFFFFFFFFFFFFFFFFFF  
FFFFFFFFFFFFFFFFFFFFFFFFFFFFFFFFFFFFFFFFFFFFFFFFFFFFFFFFFFFFFFFFFFFFFFFFFFFFF  
@A00155:342:HHGFNDSXY:1:2672:31259:28635 2:N:0:GAACCTAG+TCCGCATA  
GGTTAGCGAAGAAGAACTTATTGTGTAACGGCGGTAGCTGTATGAATACACGCGACCTCTCCGTCGTAGAC  
GTGATGGTCATGTCTTCATCTTGCTCTTCAGGTGCATTAACTACTGGCCACACCATATTGACGTCGTT  
+  
FFFFFFFFFFFFFFFFFFFFFFFFFFFFFFFFFFFFFFFFFFFFFFFFFFFFFFFFFFFFFFFFFFFFFFFFFFFFF  
FFFFFFFFFFFFFFFFFFFFFFFFFFFFFFFFFFFFFFFFFFFFFFFFFFFFFFFFFFFFFFFFFFFFFFFFFFFFF  
@A00155:342:HHGFNDSXY:1:1421:32606:27430 2:N:0:GAACCTAG+TCCGCATA  
TTAGCGAAGAAGAACTTATTGTGTAACGGCGGTAGCTGTATGAATACACGCGACCGCTCCGTCGTAGACGT  
GATGGTCATGTCTTCATCTTGCTCTTCAGGTGCATTAACTACTGGCCACACCATATTGACGTCGTTG  
+  
FFFFF:F:FFFFFFFF,FFFFFFFFFFFFFFFF,FFFFFFFFFFF::FFFFFFFFFFFFFFFFFFFFFFFFFFFFF  
FFFFFFFFFFFFFFFFFFFFFFFFFFFFFFFFFFFFFFFFFFFFFFFFFFFFFFFFFFFFFFFFFFFFFFFFFFFFF  
@A00155:342:HHGFNDSXY:1:1220:5972:21668 2:N:0:GAACCTAG+TCCGCATA  
TTAGCGAAGAAGAACTTATTGTGTAACGGCGGTAGCTGTATGAATACACGCGACCTCTCCGTCGTAGACGT  
GATGGTCATGTCTTCATCTTGCTCTTCAGGTGCATTAACTACTGGCCACACCATATTGACGTCGTTG  
+  
F:FFFFFFFFFFFFFFFF,FFFFFFFFFFFFFFFF:FFFFFFFFFFFF,FF:FFFFFF:,FFFFFFFFFFFFFFFF  
FF,FFFFFFFFFFFFFFFFFFFFFFFFFFFFFFFF,FFFFFFFFFFFF,F,FFFF,FFFFFF,FFFFFFFFFFFFF  
@A00155:342:HHGFNDSXY:1:1424:12373:11929 2:N:0:GAACCTAG+TCCGCATA  
TAGCGAAGAAGAACTTATTGTGTAACGGCGGTAGCTGTATGAATACACGCGACCTCTCCGTCGTAGACGTG  
ATGGTCATGTCTTCATCTTGCTCTTCAGGTGCATTAACTACTGGCCACACCATATTGACGTCGTTG
```

```
@A00155:342:HHGFNDSXY:1:1520:20103:24565 1:N:0:GAACCTAG+TCCGCATA
AGCGAAGAACTTATTGTGTAACGGCGGTAGCTGTATGAATACACGCGACCTCTCCGTCGTAGACGTGA
TGGTCATGTCTTCATCTTGCTCTTCAGGTGCATTAACTGGCCACACCATATTGACGTCGTTTCGGC
+
FFFFFFFFFFFFFFFFFFFFFFFFFFFFFFFFFFFFFFFFFFFFFFFFFFFFFFFFFFFFFFFFFFFFF:FFFFFFFFFFFFF
FFFFFFFFFFFFFFFFFFFF,FFFFFFFFFFFFFFFFFFFFFFFFFFFFFFFFFFFFFFFFFFFFFFFFFFFFFFFFFFFFF
@A00155:342:HHGFNDSXY:1:1356:25807:7294 2:N:0:GAACCTAG+TCCGCATA
AGCGAAGAACTTATTGTGTAACGGCGGTAGCTGTATGAATACACGCGACCTCTCCGTCGTAGACGTGA
TGGTCATGTCTTCATCTTGCTCTTCAGGTGCATTAACTGGCCACACCATATTGACGTCGTTTCGGC
+
FFFFFFFFFFFFFFFFFFFFFFFFFFFFFFFFFFFFFFFFFFFFFFFFFFFFFFFFFFFFFFFFFFFFF:FFFFFFFFFFFFF
FFFFFFFFFFFFFFFFFFFFFFFFFFFFFFFFFFFFFFFFFFFFFFFFFFFFFFFFFFFFFFFFFFFFF:FFFFFFFFFFFFF
@A00155:342:HHGFNDSXY:1:2509:32262:23109 2:N:0:GAACCTAG+TCCGCATA
GCGAAGAACTTATTGTGTAACGGCGGTAGCTGTATGAATACACGCGACCTCTCCGTCGTAGACGTGAT
GGTCATGTCTTCATCTTGCTCTTCAGGTGCATTAACTGGCCACACCATATTGACGTCGTTTCGGC
+
FFFFFFFFFFFFFFFFFFFFFFFFFFFFFFFFFFFFFFFFFFFFFFFFFFFFFFFFFFFFFFFFFFFFF:FFFFFFFFFFFFF
FFFFFFFFFFFFFFFFFFFFFFFFFFFFFFFFFFFFFFFFFFFFFFFFFFFFFFFFFFFFFFFFFFFFF,FFFFFFFFFFFFF:FFFFFFFFFFFFF
@A00155:342:HHGFNDSXY:1:2407:9824:26365 1:N:0:GAACCTAG+TCCGCATA
CGAAGAACTTATTGTGTAACGGCGGTAGCTGTATGAATACACGCGACCTCTCCGTCGTAGACGTGATG
GTCATGTCTTCATCTTGCTCTTCAGGTGCATTAACTGGCCACACCATATTGACGTCGTTTCGGCGA
+
FF:FFFFFFFFFFFFFFFFFFFFFFFFFFFFFFFFFFFFFFFFFFFFFFFFFFFFFFFFFFFFFFFFFFFFF
FFFFFFFFFFFFFFFFFFFFFFFFFFFFFFFFFFFFFFFFFFFFFFFFFFFFFFFFFFFFFFFFFFFFF,FF
@A00155:342:HHGFNDSXY:1:1573:19967:21668 2:N:0:GAACCTAG+TCCGCATA
GACTTATTGTGTAACGGCGGTAGCTGTATGAATACACGCGACCTCTCCGTCGTAGACGTGATGGTCAT
GTCTTCATCTTGCTCTTCAGGTGCATTAACTGGCCACACCATATTGACGTCGTTTCGG
+
FFFFF,FFFFFFFFFFFFFFFFFFFFFFFFFFFFFFFFFFFFFFFFFFFFFFFFFFFFFFFFFFFFFFFFFFFFF
FFFFFFFFFFFFFFFFFFFFFFFFFFFFFFFFFFFFFFFFFFFFFFFFFFFFFFFFFFFFFFFFFFFFF:FF,FFFFFFF
@A00155:342:HHGFNDSXY:1:2630:13340:29011 2:N:0:GAACCTAG+TCCGCATA
GACTTATTGTGTAACGGCGGTAGCTGTATGAATACACGCGACCTCTCCGTCGTAGACGTGATGGTCAT
GTCTTCATCTTGCTCTTCAGGTGCATTAACTGGCCACACCATATTGACGTCGTTTCGG
+
FFFFFFFFFFFFFFFFFFFF,FFFFFFFFFFFFFFFFFFFF:FFFFFFFFFFFFF:F:FFFFFFFFF,FFFFFFF
FFFFFFFFF,FFFFFFFFFFFFFFFFFFFFFFFFFFFF:FFFFFFFFFFFFF:FFFF:FFFFFFFFF
@A00155:342:HHGFNDSXY:1:1357:7337:29418 1:N:0:GAACCTAG+TCCGCATA
TATTGTGTAACGGCGGTAGCTGTATGAATACACGCGACCTCTCCGTCGTAGACGTGATGGTCATGTCT
TCATCTTGCTCTTCAGGTGCATTAACTGGCCACACCATATTGACGTCGTTTCGGCGAG
+
FFFFFFFFFFFFFFFFFFFFFFFFFFFFFFFFFFFFFFFFFFFFFFFFFFFFFFFFFFFFFFFFFFFFF:FFFFFFFFFFFFF
FFFFFFFFFFFFFFFFFFFFFFFFFFFFFFFFFFFFFFFFFFFFFFFFFFFFFFFFFFFFFFFFFFFFF
@A00155:342:HHGFNDSXY:1:2228:18701:28087 1:N:0:GAACCTAG+TCCGCATA
ATTGTGTAACGGCGGTAGCTGTATGAATACACGCGACCTCTCCGTCGTAGACGTGATGGTCATGTCTT
CATCTTGCTCTTCAGGTGCATTAACTGGCCACACCATATTGACGTCGTTTCGGCGAGAAGAATGCC
+
FFFFFFFFFFFFFFFFFFFFFFFFFFFFFFFFFFFFFFFFFFFFFFFFFFFFFFFFFFFFFFFFFFFFF
FFFFFFFFFFFFFFFFFFFFFFFFFFFFFFFFFFFFFFFFFFFFFFFFFFFFFFFFFFFFFFFFFFFFF
@A00155:342:HHGFNDSXY:1:1246:4752:22467 2:N:0:GAACCTAG+TCCGCATA
TTGTGTAACGGCGGTAGCTGTATGAATACACGCGACCTCTCCGTCGTAGACGTGATGGTCATGTCTTC
ATCTTGCTCTTCAGGTGCATTAACTGGCCACACCATATTGACGTCGTTTCGGCGAGAAGAATGCC
+
FFFFFFFFFFFFF:F:FFFFFFFFFFFFF:FFFFFFFFFFFFFFFFFFFFFFFFFFFFFFFFFFFFF
FFFFFFFFFFFFFFFFFFFFFFFFFFFF:FFFFFFFFFFFFFFFFFFFFFFFFFFFFFFFFFFFFF:FFFFFFFFFFFFF
```

```
@A00155:342:HHGFNDSXY:1:1615:27679:9784 2:N:0:GAACCTAG+TCCGCATA  
TTGTGTAACGGCGGTAGCTGTATGAATACACGCGACCTCTCCGTCGTAGACGTGATGGTCATGTCTTC  
ATCTTGCTCTTCAGGTGCATTAACTGGCCACACCATTGACGTCGTTTCGGCGAGAAGAATGCCG  
+  
FFFFFFFFFFFFFFFFFFFFFFFFFFFFFFFFFFFFFFFFFFFFFFFFFFFFFFFFFFFFFFFFFFFFF  
FFFFFFFFFFFFFFFFFFFFFFFFFFFFFFFFFFFFFFFFFFFFFFFFFFFFFFFFFFFFFFFFFFFFF  
@A00155:342:HHGFNDSXY:1:1471:10538:8531 2:N:0:GAACCTAG+TCCGCATA  
TTGTGTAACGGCGGTAGCTGTATGAATACACGCGACCTCTCCGTCGTAGACGTGATGGTCATGTCTTC  
ATCTTGCTCTTCAGGTGCATTAACTGGCCACACCATTGACGTCGTTTCGGCGAGAAGAATGCCG  
+  
FFFFFFFFFFFFFFFFFFFFFFFFFFFFFFFFFFFFFFFFFFFFFFFFFFFFFFFFFFFFFFFFFFFFF  
FFFFFFFFFFFFFFFFFFFFFFFFFFFFFFFFFFFFFFFFFFFFFFFFFFFFFFFFFFFFFFFFFFFFF  
@A00155:342:HHGFNDSXY:1:1231:7383:24580 2:N:0:GAACCTAG+TCCGCATA  
TTGTGTAACGGCGGTAGCTGTATGAATACACGCGACCTCTCCGTCGTAGACGTGATGGTCATGTCTTC  
ATCTTGCTCTTCAGGTGCATTAACTGGCCACACCATTGACGTCGTTTCGGCGAGAAGAATGCCG  
+  
FFFFFFFFFFFFFFFFFFFFFFFFFFFFFFFFFFFFFFFFFFFFFFFFFFFFFFFFFFFFFFFFFFFFF  
FFFFFFFFFFFFFFFFFFFFFFFFFFFFFFFFFFFFFFFFFFFFFFFFFFFFFFFFFFFFFFFFFFFFF  
@A00155:342:HHGFNDSXY:1:2228:18701:28087 2:N:0:GAACCTAG+TCCGCATA  
GTAACGGCGGTAGCTGTATGAATACACGCGACCTCTCCGTCGTAGACGTGATGGTCATGTCTTCATCT  
TGCTCTTCAGGTGCATTAACTGGCCACACCATTGACGTCGTTTCGGCGAGAAGAATGCCGTTGG  
+  
FFFFFFFFFFFFFFFFFFFFFFFFFFFFFFFFFFFFFFFFFFFFFFFFFFFFFFFFFFFFFFFFFFFFF  
FFFFFFFFFFFFFFFFFFFFFFFFFFFFFFFFFFFFFFFFFFFFFFFFFFFFFFFFFFFFFFFFFFFFF  
@A00155:342:HHGFNDSXY:1:2533:30644:12727 2:N:0:GAACCTAG+TCCGCATA  
GTAACGGCGGTAGCTGTATGAATACACGCGACCTCTCCGTCGTAGACGTGATGGTCATGTCTTCATCT  
TGCTCTTCAGGTGCATTAACTGGCCACACCATTGACGTCGTTTCGGCGAGAAGAATGCCGTTGG  
+  
FFFFFFFFFFFFFFFFFFFFFFFFFFFFFFFFFFFFFFFFFFFFFFFFFFFFFFFFFFFFFFFFFFFFF  
FFFFFFFFFFFFFFFFFFFFFFFFFFFFFFFFFFFFFFFFFFFFFFFFFFFFFFFFFFFFFFFFFFFFF  
@A00155:342:HHGFNDSXY:1:2361:30011:36871 2:N:0:GAACCTAG+TCCGCATA  
GTAACGGCGGTAGCTGTATGAATACACGCGACCTCTCCGTCGTAGACGTGATGGTCATGTCTTCATCT  
TGCTCTTCAGGTGCATTAACTGGCCACACCATTGACGTCGTTTCGGCGAGAAGAATGCCGTTGG  
+  
:FFFFFF:FFFFFFFFFFFFFFFFFFFFFFFFFFFFFFFFFFFFFFFFFFFFFFFFFFFFFFFFFFFFF  
FFFFFFFFFFFFFFFFFFFFFFFFFFFFFFFFFFFFFFFFFFFFFFFFFFFFFFFFFFFFFFFFFFFFF  
@A00155:342:HHGFNDSXY:1:2308:1624:30107 2:N:0:GAACCTAG+TCCGCATA  
AACGGCGGTAGCTGTATGAATACACGCGACCTCTCCGTCGTAGACGTGATGGTCATGTCTTCATCTTG  
CTCTTCAGGTGCATTAACTGGCCACACCATTGACGTCGTTTCGGCGAGAAGAATGCCGTTGG  
+  
FFFFFFFF:FFFFFFFFFF:FFFFFFFFF:FFFFFFFFFFFFFFFFFFFFFFFF:F:FFFFFFFFFFFFFFFFF  
FFF::FFFFFF:FFF:FF,FFFFFFFF:FF:FF:FF:FF:FFFFFFF:FFFFFFFFFFFF,FFF  
@A00155:342:HHGFNDSXY:1:1205:1443:25848 2:N:0:GAACCTAG+TCCGCATA  
ACGGCGGTAGCTGTATGAATACACGCGACCTCTCCGTCGTAGACGTGATGGTCATGTCTTCATCTTG  
TCTTCAGGTGCATTAACTGGCCACACCATTGACGTCGTTTCGGCGAGAAGAATGCCGTTGGCCC  
+  
FFFFFFFFFFFFFFFFFFFFFFFFFFFF:FFFFFFFFFFFFFFFFFFFF:F:FFFFFFFFFFFFFFFFFFFFF  
FFFFFFFFFFFFFFFFFFFF:FFFFFFFFFFFFFFFFFFFFFFFFFFFF:FFFFFFFFFFFFFF:FF:FFFFFFFFFFFFF  
@A00155:342:HHGFNDSXY:1:1205:2094:26443 2:N:0:GAACCTAG+TCCGCATA  
ACGGCGGTAGCTGTATGAATACACGCGACCTCTCCGTCGTAGACGTGATGGTCATGTCTTCATCTTG  
TCTTCAGGTGCATTAACTGGCCACACCATTGACGTCGTTTCGGCGAGAAGAATGCCGTTGGCCCC  
+
```



[illegible]

@A00155:342:HHGFNDSXY:1:2413:26512:27430 2:N:0:GAACCTAG+TCCGCATA  
GACCTCTCCGTCGTAGACGTGATGGTCATGTCTTCATCTTGCTCTTCAGGTGCATTAAACTGGCCA  
CACCATATTGACGTCGTTGCGCGAGAAGAATGCCGTTGGCCCCGCCAATTCGGCCCCTGTTCTGAAGT  
+  
FFFFFFFFFFFFFFFFFFFFFFFFFFFFFFFFFFFFFFFFFFFFFFFFFFFFFFFFFFFFFFFFFFFFFFFFFFFFF  
FFFFFFFFFFFFFFFFFFFFFFFFFFFFFFFFFFFFFFFFFFFFFFFFFFFFFFFFFFFFFFFFFFFFFFFFFFFFF  
@A00155:342:HHGFNDSXY:1:2606:10809:20055 1:N:0:GAACCTAG+TCCGCATA  
ACCTCTCCGTCGTAGACGTGATGGTCATGTCTTCATCTTGCTCTTCAGGTGCATTAAACTGGCCAC  
ACCATATTGACGTCGTTGCGCGAGAAGAATGCCGTTGGCCCCGCCAATTCGGCCCCTGTTCTGAAGTC  
+  
FFFFFFFFFFFFFFFFFFFFFFFFFFFFFFFFFFFFFFFFFFFFFFFFFFFFFFFFFFFFFFFFFFFFFFFFFFFFF  
FFFFF,FFFFFFFFFFFFFFFFFFFFFFFFFFFFFFFFFFFFFFFFFFFFFFFFFFFFFFFFFFFFFFFFFFFFF:FFF  
@A00155:342:HHGFNDSXY:1:1110:19018:26757 2:N:0:GAACCTAG+TCCGCATA  
CTCTCCGTCGTAGACGTGATGGTCATGTCTTCATCTTGCTCTTCAGGTGCATTAAACTGGCCACAC  
CATATTGACGTCGTTGCGCGAGAAGAATGCCGTTGGCCCCGCCAATTCGGCCCCTGTTCTGAAGTCTA  
+  
FFFFFFFFFFFFFFFFFFFFFFFFFFFFFFFFFFFFFFFFFFFFFFFFFFFFFFFFFFFFFFFFFFFFFFFFFFFFF,FFFFFFFFFFFFFFFFFFFFF  
FFFFFFFFFFFFFFFFFFFFFFFFFFFFFFFFFFFFFFFFFFFFFFFFFFFFFFFFFFFFFFFFFFFFFFFFFFFFF  
@A00155:342:HHGFNDSXY:1:1143:13901:13322 2:N:0:GAACCTAG+TCCGCATA  
GTCGTAGACGTGATGGTCATGTCTTCATCTTGCTCTTCAGGTGCATTAAACTGGCCACACCATATT  
GACGTCGTTGCGCGAGAAGAATGCCGTTGGCCCCGCCAATTCGGCCCCTGTTCTGAAGTCTATATCGT  
+  
FFFFFFFFFFFFFFFFFFFFFFFFFFFFFFFFFFFFFFFFFFFFFFFFFFFFFFFFFFFFFFFFFFFFFFFFFFFFF  
FFFFFFFFFFFFFFFFFFFFFFFFFFFFFFFFFFFFFFFFFFFFFFFFFFFFFFFFFFFFFFFFFFFFF:FFFFFFFFFF:FFFFF  
@A00155:342:HHGFNDSXY:1:2407:9824:26365 2:N:0:GAACCTAG+TCCGCATA  
CGTGATGGTCATGTCTTCATCTTGCTCTTCAGGTGCATTAAACTGGCCACACCATATTGACGTCGT  
TCGCGAGAAGAATGCCGTTGGCCCCGCCAATTCGGCCCCTGTTCTGAAGTCTATATCGTAACCACA  
+  
FFFFFFFFFFFFFFFFFFFFFFFFFFFFFFFFFFFFFFFFFFFFFFFFFFFFFFFFFFFFFFFFFFFFFFFFFFFFF  
FFFFFFFFFFFFFFFFFFFFFFFFFFFFFFFFFFFFFFFFFFFFFFFFFFFFFFFFFFFFFFFFFFFFF  
@A00155:342:HHGFNDSXY:1:1439:29080:21512 2:N:0:GAACCTAG+TCCGCATA  
GATGGTCATGTCTTCATCTTGCTCTTCAGGTGCATTAAACTGGCCACACCATATTGACGTCGTTGCG  
GCGAGAAGAATGCCGTTGGCCCCGCCAATTCGGCCCCTGTTCTGAAGTCTATATCGTAACCACACAGC  
+  
FFFFFFFFFFFFFFF:FFFFFFFFFFFFFFFFFFFFFFFFFFFFFFFFFFFFFFFFFFFFFFFFFFFFFFFFFFFFF:FFFFFFFFFFFFFFFFFFFFF  
FFFFFFFFFFFFFFFFFFFFFFFFFFFFFFFFFFFFFFFFFFFFFFFFFFFFFFFFFFFFFFFFFFFFF:FFFFFFFF,F:FFFFFFFFFFFF::FFFFFFFFFFFFFFFFFFFFF  
@A00155:342:HHGFNDSXY:1:1646:28483:30592 2:N:0:GAACCTAG+TCCGCATA  
GATGGTCATGTCTTCATCTTGCTCTTCAGGTGCATTAAACTGGCCACACCATATTGACGTCGTTGCG  
GCGAGAAGAATGCCGTTGGCCCCGCCAATTCGGCCCCTGTTCTGAAGTCTATATCGTAACCACACAGC  
+  
FFFFFFFFFFFFFFFFFFFFFFFFFFFFFFFFFFFFFFFFFFFFFFFFFFFFFFFFFFFFFFFFFFFFF:FFFFFFFFFFFF  
FFFFFFFFFFFFFFFFFFFFFFFFFFFFFFFFFFFFFFFFFFFFFFFFFFFFFFFFFFFFFFFFFFFFF:FFFFF,F:FFFFFFFFFFFF::FFFFFFFFFFFFFFFFFFFFF  
@A00155:342:HHGFNDSXY:1:1107:31521:11021 2:N:0:GAACCTAG+TCCGCATA  
GATGGTCATGTCTTCATCTTGCTCTTCAGGTGCATTAAACTGGCCACACCATATTGACGTCGTTGCG  
GCGAGAAGAATGCCGTTGGCCCCGCCAATTCGGCCCCTGTTCTGAAGTCTATATCGTAACCACACAGC  
+  
FFFFFFFFFFFF:FFFFFFFFFF:FFFFFFFFFFFFFFFFFFFFFFFFFFFFFFFFFFFFFFFFFFFFFFFFFFFFF:FFFFFFFFFFFFFFFFFFFFF  
FFFFFFFFFFFFFFFFFFFFFFFFFFFFFFFFFFFFFFFFFFFFFFFFFFFFFFFFFFFFFFFFFFFFF:FFFFFFFFFFFFFFFFFFFFFFFFFFFFFFFFFFFFF  
@A00155:342:HHGFNDSXY:1:2452:1353:1517 1:N:0:GAACCTAG+TCCGCATA  
GGTCATGTCTTCATCTTGCTCTTCAGGTGCATTAAACTGGCCACACCATATTGACGTCGTTGCGCG  
AGAAGAATGCCGTTGGCCCCGCCAATTCGGCCCCTGTTCTGAAGTCTATATCGTAACCACACAGCCTC  
+  
FFFFFFFFFFFFFFFFFFFFFFFFFFFFFFFFFFFFF:FFFFF,:FFFFFFF,FFFFFFFFF:FFFFFFFFF:FFFFFFFFFFFFFFFFFFFFF  
FF:FFFFFFFFFFFFFFFFFFFFFFFFFFFFFFFFFFFFF:FFFFFFFFFFFFFFFFFFFFFFFFFFFFFFFFFFFFF:FFFFFFFFFFFFFFFFFFFFF  
@A00155:342:HHGFNDSXY:1:2452:1353:1517 1:N:0:GAACCTAG+TCCGCATA  
GGTCATGTCTTCATCTTGCTCTTCAGGTGCATTAAACTGGCCACACCATATTGACGTCGTTGCGCG  
AGAAGAATGCCGTTGGCCCCGCCAATTCGGCCCCTGTTCTGAAGTCTATATCGTAACCACACAGCCTC  
+

$+$ 

@A00155:342:HHGFNDSXY:1:1139:27760:22921 2:N:0:GAACCTAG+TCCGCATA  
GTCTTCATCTTGCTCTTCAGGTGCATTTAACTGGCCACACCATATTGACGTCGTTGCGCGAGAAGA  
ATGCCGTTGGCCCCGCCAATTCGGCCCCCTGTTCTGAAGTCTATATCGTAACCACACAGC

+

@A00155:342:HHGFNDSXY:1:2452:1353:1517 2:N:0:GAACCTAG+TCCGCATA  
GTCTTCATCTTGCTCTTCAGGTGCATTTAACTGGCCACACCATATTGACGTCGTTGCGCGAGAAGA  
ATGCCGTTGGCCCCGCCAATACGGCCCCCTGTTCTGAAGTCTATATCGTAACCACACAGCCTCGCCAA

+

@A00155:342:HHGFNDSXY:1:1432:30038:12868 2:N:0:GAACCTAG+TCCGCATA  
GTCTTCATCTTGCTCTTCAGGTGCATTTAACTGGCCACACCATATTGACGTCGTTTCGGCGAGAAGA  
ATGCCGTTGGCCCCGCCAATTCGGCCCCCTGTTCTGAAGTCTATATCGTAACCACACAGCCTCGCCAAA

+

@A00155:342:HHGFNDSXY:1:1101:13467:2206 1:N:0:GAACCTAG+TCCGCATA  
CATCTTGCTCTTCAGGTGCATTTAACTGGCCACACCATAATTGACGTCGTTGCGCGAGAAGAATGCC  
GTTGGCCCCGCCAATTCGGCCCCCTGTTCTGAAGTCTATATCGTAACCACACAGCCTCGCCAAATTCGC

+

@A00155:342:HHGFNDSXY:1:1446:7455:4758 2:N:0:GAACCTAG+TCCGCATA  
CTCTTCAGGTGCATTTAACACTGGCCACACCATATTGACGTCGTTCGGCGAGAAGAATGCCGTTGGCC  
CCGCCAATTCGGCCCCTGTTCTGAAGTCTATATCGTAACCACACAGCCTCGCCAAATTCGCGACCACC

+

@A00155:342:HHGFNDSXY:1:2176:25907:12790 1:N:0:GAACCTAG+TCCGCATA  
CTTCAGGTGCATTTAACTGGCCACACCATATTGACGTCGTTGCGCGAGAAGAATGCCGTTGGCCCC  
GCCAATTCGGCCCCCTGTTCTGAAGTCTATATCGTAACACACGGCCTCGCCAAATTCGCG

+

@A00155:342:HHGFNDSXY:1:1535:3803:22608 1:N:0:GAACCTAG+TCCGCATA  
CTTCAGGTGCATTTAACTGGCCACACCATAATTGACGTCGTTGCGCGAGAAGAATGCCGTTGGCCCC  
GCCAATTCGGCCCCCTGTTCTGAAGTCTATATCGTAACACACAGCCTCGCCAAATTCGCGACCA

+

@A00155:342:HHGFNDSXY:1:2567:6289:11757 2:N:0:GAACCTAG+TCCGCATA  
TTCAGGTGCATTTAACTGGCCACACCATATTGACGTCGTTGGCGAGAAGAATGCCGTTGGCCCCG  
CCAATTTCGGCCCCTGTTCTGAAGTCTATATCGTAACACACAGCCTCGCCAAATTTCGCGACCACCCAC

+

[illegible]



```

@A00155:342:HHGFNDSXY:1:1101:13467:2206 2:N:0:GAACCTAG+TCCGCATA
ATTTAACTGCGCCACACCATATTGACGTCGTTTCGGCGAGAAGAATGCCGTTGGCCCCGCCAATTCGGC
CCCCTGTTCTGAAGTCTATATCGTAACCACACAGCCTCGCCAAATTCGCGACCACCCACGCGTCCTTA
+
FFFFFFFFFFFFFFFFFFFFFFFFFFFFFFFFFFFFFFFFFFFFFFFFFFFFFFFFFFFFFFFFFFFFFFFFFFFF
FFFFFFFFFFFFFFFFFFFFFFFFFFFFFFFFFFFFFFFFFFFFFFFFFFFFFFFFFFFFFFFFFFFFFFFFFFFF
@A00155:342:HHGFNDSXY:1:1446:7455:4758 1:N:0:GAACCTAG+TCCGCATA
TTTAACTGCGCCACACCATATTGACGTCGTTTCGGCGAGAAGAATGCCGTTGGCCCCGCCAATTCGGC
CCCTGTTCTGAAGTCTATATCGTAACCACACAGCCTCGCCAAATTCGCGACCACCCACGCGTCCTTA
+
FFFFFFFFFFFFFFFFFFFFFFFFFFFFFFFFFFFFFFFFFFFFFFFFFFFFFFFFFFFFFFFFFFFFFFFFFFFF
FFFFF:FFFFFFFFFFFFFFFFFFFFFFFFFFFFFFFFFFFFFFFFFFFFFFFFFFFFFFFFFFFFFFFFFFFF
@A00155:342:HHGFNDSXY:1:1625:4490:25488 1:N:0:GAACCTAG+TCCGCATA
TTAAGTCTGCGCCACACCATATTGACGTCGTTTCGGCGAGAAGAATGCCGTTGGCCCCGCCAATTCGGCC
CCTGTTCTGAAGTCTATATCGTAACCACACAGCCTCGCCAAATTCGCGACCACCCACGCGTCCTTA
+
FFFFFFFFFFFFFFFFFFFFFFFFFFFFFFFFFFFFFFFFFFFFFFFFFFFFFFFFFFFFFFFFFFFFFFFFFFFF
FFFFFFFFFFFFFFFFFFFFFFFFFFFFFFFFFFFFFFFFFFFFFFFFFFFFFFFFFFFFFFFFFFFFFFFFFFFF
@A00155:342:HHGFNDSXY:1:2625:32705:4586 1:N:0:GAACCTAG+TCCGCATA
TTAAGTCTGCGCCACACCATATTGACGTCGTTTCGGCGAGAAGAATGCCGTTGGCCCCGCCAATTCGGCC
CCTGTTCTGAAGTCTATATCGTAACCACACAGCCTCGCCAAATTCGCGACCACCCACGCGTCCTTAGC
+
FFFFFFFFFFFFFFFFFFFFFFFFFFFFFFFFFFFFFFFFFFFFFFFFFFFFFFFFFFFFFFFFFFFFFFFFFFFF
FFFFFFFFFFFFFFFFFFFFFFFFFFFFFFFFFFFFFFFFFFFFFFFFFFFFFFFFFFFFFFFFFFFFFFFFFFFF
@A00155:342:HHGFNDSXY:1:1560:32786:4914 1:N:0:GAACCTAG+TCCGCATA
TTAAGTCTGCGCCACACCATATTGACGTCGTTTCGGCGAGAAGAATGCCGTTGGCCCCGCCAATTCGGCC
CCTGTTCTGAAGTCTATATCGTAACCACACAGCCTCGCCAAATTCGCGACCACCCACGCGTCCTTAGC
+
FFFFFFFFFFFFFFFFFFFFFFFFFFFFFFFFFFFFFFFFFFFFFFFFFFFFFFFFFFFFFFFFFFFFFFFFFFFF
FFFFFFFFFFFFFFFFFFFFFFFFFFFFFFFFFFFFFFFFFFFFFFFFFFFFFFFFFFFFFFFFFFFFFFFFFFFF
@A00155:342:HHGFNDSXY:1:2403:30897:4022 1:N:0:GAACCTAG+TCCGCATA
TTAAGTCTGCGCCACACCATATTGACGTCGTTTCGGCGAGAAGAATGCCGTTGGCCCCGCCAATTCGGCC
CCTGTTCTGAAGTCTATATCGTAACCACACAGCCTCGCCAAATTCGCGACCACCCACGCGTCCTTAGC
+
FFFFFFFFFFFFFFFFFFFFFFFFFFFFFFFFFFFFFFFFFFFFFFFFFFFFFFFFFFFFFFFFFFFFFFFFFFFF
FFFFFFFFFFFFFFFFFFFFFFFFFFFFFFFFFFFFFFFFFFFFFFFFFFFFFFFFFFFFFFFFFFFFFFFFFFFF
@A00155:342:HHGFNDSXY:1:2660:7654:24893 1:N:0:GAACCTAG+TCCGCATA
TTAAGTCTGCGCCACACCATATTGACGTCGTTTCGGCGAGAAGAATGCCGTTGGCCCCGCCAATTCGGCC
CCTGTTCTGAAGTCTATATCGTAACCACACAGCCTCGCCAAATTCGCGACCCCCACGCGTCCTTAGC
+
FFFFFFFFFFFFFFFFFFFFFFFFFFFFFFFFFFFFFFFFFFFFFFFFFFFFFFFFFFFFFFFFFFFFFFFFFFFF
FFFFFFFFFFFFFFFFFFFFFFFFFFFFFFFFFFFFFFFFFFFFFFFFFFFFFFFFFFFFFFFFFFFFFFFFFFFF
@A00155:342:HHGFNDSXY:1:1139:27760:22921 1:N:0:GAACCTAG+TCCGCATA
TAAGTCTGCGCCACACCATATTGACGTCGTTTCGGCGAGAAGAATGCCGTTGGCCCCGCCAATTCGGCCC
CTGTTCTGAAGTCTATATCGTAACCACACAGCCTCGCCAAATTCGCG
+
FFFFFFFFFFFFFFFFFFFFFFFFFFFFFFFFFFFFFFFFFFFFFFFFFFFFFFFFFFFFFFFFFFFFFFFFFFFF
FFFFFFFFFFFFFFFFFFFFFFFFFFFFFFFFFFFFFFFFFFFFFFFFFFFFFFFFFFFFFFFFFFFFFFFFFFFF
@A00155:342:HHGFNDSXY:1:1401:32036:18646 1:N:0:GAACCTAG+TCCGCATA
TAAGTCTGCGCCACACCATATTGACGTCGTTTCGGCGAGAAGAATGCCGTTGGCCCCGCCAATTCGGCCC
CTGTTCTGAAGTCTATATCGTAACCACACAGCCTCGCCAAATTCGCGACCACCCAC
+
FFFFFFFFFFFFFFFFFFFFFFFFFFFFFFFFFFFFFFFFFFFFFFFFFFFFFFFFFFFFFFFFFFFFFFFFFFFF
FFFFFFFFFFFFFFFFFFFFFFFFFFFFFFFFFFFFFFFFFFFFFFFFFFFFFFFFFFFFFFFFFFFFFFFFFFFF
@A00155:342:HHGFNDSXY:1:1401:32036:18646 1:N:0:GAACCTAG+TCCGCATA
TAAGTCTGCGCCACACCATATTGACGTCGTTTCGGCGAGAAGAATGCCGTTGGCCCCGCCAATTCGGCCC
CTGTTCTGAAGTCTATATCGTAACCACACAGCCTCGCCAAATTCGCGACCACCCAC

```

@A00155:342:HHGFNDSXY:1:1263:29152:13589 1:N:0:GAACCTAG+TCCGCATA  
TAACACTGGCCACACCATATTGACGTCGTTCGGCGAGAAGAATGCCGTTGGCCCCGCCAATTCGGCCC  
CTGTTCTGAAGTCTATATCATAACCACACAGCCTCGCCAAATTCGCGACCACCCAC

+

FFFFFFFFFFFFFFFFFFFFFFFFFFFFFFFFFFFFFFFFFFFFFFFFFFFFFFFFFFFFFFFFFFFFFFFF  
FFFFFFFFFFFFFFFFFFFFFFFFFFFFFFFFFFFFFFFFFFFFFFFFFFFFFFFFFFFFFFFFFFFFFFFF

@A00155:342:HHGFNDSXY:1:2476:21124:13369 1:N:0:GAACCTAG+TCCGCATA  
TAACACTGGCCACACCATATTGACGTCGTTCGGCGAGAAGAATGCCGTTGGCCCCGCCAATTCGGCCC  
CTGTTCTGAAGTCTATATCGTAACCACACAGCCTCGCCAAATTCGCGACCACCCAC

+

FFFFFFFFFFFFFFFFFFFFFFFFFFFFFFFFFFFFFFFFFFFFFFFFFFFFFFFFFFFFFFFFFFFFFFFF  
FFFFFFFFFFFFFFFFFFFFFFFFFFFFFFFFFFFFFFFFFFFFFFFFFFFFFFFFFFFFFFFFFFFFFFFF

@A00155:342:HHGFNDSXY:1:2567:6289:11757 1:N:0:GAACCTAG+TCCGCATA  
TAACACTGGCCACACCATATTGACGTCGTTCGGCGAGAAGAATGCCGTTGGCCCCGCCAATTCGGCCC  
CTGTTCTGAAGTCTATATCGTAACCACACAGCCTCGCCAAATTCGCGACCACCCAC

+

FFFFFFFFFFFFFFFFFFFFFFFFFFFFFFFFFFFFFFFFFFFFFFFFFFFFFFFFFFFFFFFFFFFF:FFFFFFF  
FFFFFFFFFFFF:FFFFFFFFF::FFFFFFFFFFFFFFFFFFFFFFFFFFFFFFFFFFFFFFFF

@A00155:342:HHGFNDSXY:1:1524:12888:11350 1:N:0:GAACCTAG+TCCGCATA  
TAACACTGGCCACACCATATTGACGTCGTTCGGCGAGAAGAATGCCGTTGGCCCCGCCAATTCGGCCC  
CTGTTCTGAAGTCTATATCGTAACCACACAGCCTCGCCAAATTCGCGACCACCCAC

+

FFFFFFFFFFFFFFFFFFFFFFFFFFFFFFFFFFFFFFFFFFFFFFFFFFFFFFFFFFFFFFFFFFFF:FFFFFFF  
FFFFFFFFFFFFFFFFFFFFFFFFFFFFFFFFFFFFFFFFFFFFFFFFFFFFFFFFFFFFFFFFFFFF

@A00155:342:HHGFNDSXY:1:1471:29152:2691 1:N:0:GAACCTAG+TCCGCATA  
TAACACTGGCCACACCATATTGACGTCGTTCGGCGAGAAGAATGCCGTTGGCCCCGCCAATTCGGCCC  
CTGTTCTGAAGTCTATATCGTAACCACACAGCCTCGCCAAATTCGCGACCACCCACG

+

FFFFFFFFF,FFF:FFFF:FF,,F,FFFF:FF,,FFF::F:FF:F,F,FF:FFF:F:,FFFFFFFFF::  
FF:FF:,::FFF:F:FFFF,,FF::FFFFFFFF,FF:FFFFFF,F::,F,FF,FFFF:

@A00155:342:HHGFNDSXY:1:2666:4291:35008 1:N:0:GAACCTAG+TCCGCATA  
TAACACTGGCCACACCATATTGACGTCGTTCGGCGAGAAGAATGCCGTTGGCCCCGCCAATTCGGCCC  
CTGTTCTGAAGTCTATATCGTAACCACACAGCCTCGCCAAATTCGCGACCACCCACGC

+

FFFFFFF:FFFFFFFFFFFFFFFFFFFFFFFFFFFFFFFFFFFFFFFFFFFFFFFFFFFFFFFFFFFF:FFFFFFF  
FFFFFFFFF:FFFFFFFFF:F::FFFFFFFFFFFFFFFFFFFFFFFFFFFF,FFFFFFFFFFFFFFF

@A00155:342:HHGFNDSXY:1:1168:21151:28009 1:N:0:GAACCTAG+TCCGCATA  
TAACACTGGCCACACCATATTGACGTCGTTCGGCGAGAAGAATGCCGTTGGCCCCGCCAATTCGGCCC  
CTGTTCTGAAGTCTATATCGTAACCACACAGCCTCGCCAAATTCGCGACCACCCACGCGTCCTT

+

FFFFFFFFFFFFFFFFFFFFFFFFFFFFFFFFFFFFFFFFFFFFFFFFFFFFFFFFFFFFFFFFFFFF  
FFFFFFFFFFFFFFFFFFFFFFFFFFFFFFFFFFFFFFFFFFFFFFFFFFFFFFFFFFFFFFFFFFFF

@A00155:342:HHGFNDSXY:1:2447:2944:21590 1:N:0:GAACCTAG+TCCGCATA  
TAACACTGGCCACACCATATTGACGTCGTTCGGCGAGAAGAATGCCGTTGGCCCCGCCAATTCGGCCC  
CTGTTCTGAAGTCTATATCGTAACCACACAGCCTCGCCAAATTCGCGACCACCCACGCGTCCTTAGCT

+

FFFFFFFFFFFFFFFFFFFFFFFFFFFFFFFFFFFFFFFFFFFFFFFFFFFFFFFFFFFFFFFFFFFF  
FFFFFFFFFFFFFFFFFFFFFFFFFFFFFFFFFFFFFFFFFFFFFFFFFFFFFFFFFFFFFFFFFFFF

@A00155:342:HHGFNDSXY:1:1466:22661:30906 1:N:0:GAACCTAG+TCCGCATA  
TAACACTGGCCACACCATATTGACGTCGTTCGGCGAGAAGAATGCCGTTGGCCCCGCCAATTCGGCCC  
CTGTTCTGAAGTCTATATCGTAACCACACAGCCTCGCCAAATTCGCGACCACCCACGCGTCCTTAGCT

+

FFFFFFFFFFFFFFFFF:FFFFFFFFFFFFFFFFFFFFFFFFFFFFFFFFFFFFFFFFFFFFFFFFFFFF  
FFFFFFFFFFFFFFFFF:F:FFFFFFFFFFFFFFFFFFFFFFFFFFFFFFFFFFFFFFFFFFFFFFFF

@A00155:342:HHGFNDSXY:1:1554:14904:6574 1:N:0:GAACCTAG+TCCGCATA  
TAACACTGGCCACACCATATTGACGTCGTTGCGCGAGAAGAATGCCGTTGGCCCCGCCAATTCGGCCC  
CTGTTCTGAAGTCTATATCGTAACCACACAGCCTCGCCAAATTCGCGACCACCCACGCGTCCTTAGCT  
+  
FFFFFFFFFFFFFFFFFFFFFFFFFFFFFFFFFFFFFFFFFFFFFFFFFFFFFFFFFFFFFFFFFFFFFFFF  
FFFFFFFFFFFFFFFF:FFFFFFFFFFFFFFFFFFFFFFFFFFFFFFFFFFFFFFFFFFFFFFFFFFFFFFFF  
@A00155:342:HHGFNDSXY:1:2124:21423:19398 2:N:0:GAACCTAG+TCCGCATA  
AACACTGGCCACACCATATTGACGTCGTTGCGCGAGAAGAATGCCGTTGGCCCCGCCAATTCGGCCCC  
TGTTCTGAAGTCTATATCGTAACCACACAGCCTCGCCAAATTCGCGACCACCCACGCGTCCTTAGCT  
+  
FFFFFFFFFFFFFFFFFFFFFFFFFFFFFFFFFFFFFFFFFFFFFFFFFFFFFFFFFFFFFFFFFFFFFFFF  
FFFFFFFFFFFFFFFF:FFFFFFFFFFFFFFFFFFFFFFFFFFFFFFFFFFFFFFFFFFFFFFFFFFFFFFFF  
@A00155:342:HHGFNDSXY:1:2604:25690:13416 2:N:0:GAACCTAG+TCCGCATA  
ACTGGCCACACCATATTGACGTCGTTGCGCGAGAAGAATGCCGTTGGCCCCGCCAATTCGGCCCCTGT  
TCTGAAGTCTATATCGTAACCACACAGCCTCGCCAAATTCGCGACCACCCACGCGTCCTTAGCTTTCA  
+  
FFFFFFFFFFFFFFFFFFFFFFFFFFFFFFFFFFFFFFFFFFFFFFFFFFFFFFFFFFFFFFFFFFFFFFFF  
FFFFF:FFF,F,FFFFFFFFFFFFFFFFFFFFFFFFFFFFFFFFFFFFFFFFFFFFFFFFFFFFFFFF:  
@A00155:342:HHGFNDSXY:1:1329:8124:31845 1:N:0:GAACCTAG+TCCGCATA  
TGGCCACACCATATTGACGTCGTTGCGCGAGAAGAATGCCGTTGGCCCCGCCAATTCGGCCCCTGTTC  
TGAAGTCTATATCGTAACCACACAGCCTCGCCAAATTCGCGACCACCCACGCGTCCTTAGCTTTCATC  
+  
FFFFFFFFFFFFFFFFFFFFFFFFFFFFFFFFFFFFFFFFFFFFFFFFFFFFFFFFFFFFFFFFFFFFFFFF  
FFFFFFFFFFFFFFFFFFFFFFFFFFFFFFFFFFFFFFFFFFFFFFFFFFFFFFFFFFFFFFFFFFFFFFFF  
@A00155:342:HHGFNDSXY:1:2446:23484:30107 1:N:0:GAACCTAG+TCCGCATA  
GGCCACACCATATTGACGTCGTTGCGCGAGAAGAATGCCGTTGGCCCCGCCAATTCGGCCCCTGTTCT  
GAAGTCTATATCGTAACCACACAGCCTCGCCAAATTCGCGACCACCCACGCGTCCTTAGCTTTCATCT  
+  
FFFFFFFFFFFFFFFFFFFFFFFFFFFFFFFFFFFFFFFFFFFFFFFFFFFFFFFFFFFFFFFFFFFFFFFF  
FFFFFFFFFFFFFFFFFFFFFFFFFFFFFFFFFFFFFFFFFFFFFFFFFFFFFFFFFFFFFFFFFFFFFFFF  
@A00155:342:HHGFNDSXY:1:1334:14814:36573 1:N:0:GAACCTAG+TCCGCATA  
GCCACACCATATTGACGTCGTTGCGCGAGAAGAATGCCGTTGGCCCCGCCAATTCGGCCCCTGTTCTG  
AAGTCTATATCGTAACCACACAGCCTCGCCAAATTCGCGACCACCCACGCGTCCTTAGCTTTCATCT  
+  
FFFFFFFFFFFFFFFFFFFFFFFFFFFFFFFFFFFFFFFFFFFFFFFFFFFFFFFFFFFFFFFFFFFFFFFF  
FFFFF:FFFFFFFFFFFFFFFFFFFFFFFFFFFFFFFFFFFFFFFFFFFFFFFFFFFFFFFFFFFFFFFF  
@A00155:342:HHGFNDSXY:1:1519:17589:30545 1:N:0:GAACCTAG+TCCGCATA  
GCCACACCATATTGACGTCGTTGCGCGAGAAGAATGCCGTTGGCCCCGCCAATTCGGCCCCTGTTCTG  
AAGTCTATATCGTAACCACACAGCCTCGCCAAATTCGCGACCACCCACGCGTCCTTAGCTTTCATCT  
+  
FFFFFFFFFFFFFFFFFFFFFFFFFFFFFFFFFFFFFFFFFFFFFFFFFFFFFFFFFFFFFFFFFFFFFFFF  
FFFFFFFFFFFFFFFFFFFFFFFFFFFFFFFFFFFFFFFFFFFFFFFFFFFFFFFFFFFFFFFFFFFFFFFF  
@A00155:342:HHGFNDSXY:1:1115:29460:10676 1:N:0:GAACCTAG+TCCGCATA  
GCCACACCATATTGACGTCGTTGCGCGAGAAGAATGCCGTTGGCCCCGCCAATTCGGCCCCTGTTCTG  
AAGTCTATATCGTAACCACACAGCCTCGCCAAATTCGCGACCACCCACGCGTCCTTAGCTTTCATCT  
+  
FFFFFFFFFFFFFFFFFFFFFFFFFFFFFFFFFFFFFFFFFFFFFFFFFFFFFFFFFFFFFFFFFFFFFFFF  
FFFFFFFFFFFFFFFFFFFFFFFFFFFFFFFFFFFFFFFFFFFFFFFFFFFFFFFFFFFFFFFFFFFFFFFF  
@A00155:342:HHGFNDSXY:1:1355:13548:24862 1:N:0:GAACCTAG+TCCGCATA  
GCCACACCATATTGACGTCGTTGCGCGAGAAGAATGCCGTTGGCCCCGCCAATTCGGCCCCTGTTCTG  
AAGTCTATATCGTAACCACACAGCCTCGCCAAATTCGCGACCACCCACGCGTCCTTAGCTTTCATCT  
+  
F:FFFFFFFFFFFF:FF::FFFF:FFFFFFFFFF:FF:FFFFFFFFF,FFFFFF:F,F:FFFFFFFFF  
F:FFF:F:FF:FFFFF:F:FFF:FFFFFFFFFFFF:FFF::FFF,F,FFF,F:FFFFFFFFF:F::

@A00155:342:HHGFNDSXY:1:1355:13548:24862 2:N:0:GAACCTAG+TCCGCATA  
ACACCATATTGACGTCGTTGCGCGAGAAGAATGCCGTTGGCCCCGCCAATTCGGCCCCTGTTCTGAAG  
TCTATATCGTAACCACACAGCCTCGCCAAATTCGCGACCACCCACGCGTCCTTAGCTTTTCATCTTAAAC  
+  
:FF:FFFFFFFF:FF:FFFFFFFF:FFFFFFFF:FFFFFFFF,FF:FFF,:F,FFF:F,F:FFF:FF  
F,FFFFFFFFFFFFFFFF,F:FF:FFFFFFFF:FFF:FFF::FFFFFF:FFF,FFFF:FFFF:FFF  
@A00155:342:HHGFNDSXY:1:2540:7455:14403 1:N:0:GAACCTAG+TCCGCATA  
CACCATATTGACGTCGTTGCGCGAGAAGAATGCCGTTGGCCCCGCCAATTCGGCCCCTGTTCTGAAGT  
CTATATCGTAACCACACAGCCTCGCCAAATTCGCGACCACCCACGCGTCCTTAGCTTTTCATCTTAAAC  
+  
FFFFFFFFFFFFFFFFFFFFFFFFFFFFFFFFFFFFFFFFFFFFFFFFFFFFFFFFFFFFFFFFFFFFFFFF  
FFFFFFFFFFFFFFFFFFFFFFFF:FFFFFFFF:FFFFFFFFFFFFFFFFFFFFFFFF:FFF:FFFFFFF  
@A00155:342:HHGFNDSXY:1:1625:4490:25488 2:N:0:GAACCTAG+TCCGCATA  
CCATATTGACGTCGTTGCGCGAGAAGAATGCCGTTGGCCCCGCCAATTCGGCCCCTGTTCTGAAGTCT  
ATATCGTAACCACACAGCCTCGCCAAATTTGCGACCACCCACGCGTCCTTAGCTTTTCATCTTAAAC  
+  
FFFFFFFFFFFFFFFF,FFFFFFFFFFFFFFFFFFFFFFFFFFFFFFFFFFFFFFFFFFFFFFFF,FFFF  
F:FFFFFFFFFFFFFFFF:FFFFFFFFFFFFFFFFFFFFFFFFFFFFFFFF:FFFFFFFFFFFFFFFF:FF  
@A00155:342:HHGFNDSXY:1:2660:7654:24893 2:N:0:GAACCTAG+TCCGCATA  
CATATTGACGTCGTTGCGCGAGAAGAATGCCGTTGGCCCCGCCAATTCGGCCCCTGTTCTGAAGTCTA  
TATCGTAACCACACAGCCTCGCCAAATTCGCGACCACCCACGCGTCCTTAGCTTTTCATCTTAAACCCC  
+  
FFFFF:FFFFFFFF:FFFFFFFFFFFFFFFFFFFFFFFFFFFFFFFFFFFFFFFF:FFFFFFFF:FF  
FFFFFFFFFFFFFFFF:FFFFFFFFFFFFFFFFFFFFFFFFFFFFFFFFFFFFFFFFFFFFFFFFFFFFF  
@A00155:342:HHGFNDSXY:1:2124:21423:19398 1:N:0:GAACCTAG+TCCGCATA  
ATATTGACGTCGTTGCGCGAGAAGAATGCCGTTGGCCCCGCCAATTCGGCCCCTGTTCTGAAGTCTAT  
ATCGTAACCACACAGCCTCGCCAAATTCGCGACCACCCACGCGTCCTTAGCTTTTCATCTTAAACCCC  
+  
FFFFFFFFFFFFFFFFFFFFFFFFFFFFFFFFFFFFFFFFFFFFFFFFFFFFFFFFFFFFFFFFFFFFFFFF  
FFFFFFFFFFFFFFFFFFFFFFFFFFFFFFFFFFFFFFFFFFFFFFFFFFFFFFFFFFFFFFFFFFFFFFFF  
@A00155:342:HHGFNDSXY:1:1470:19126:21590 1:N:0:GAACCTAG+TCCGCATA  
ATTGACGTCGTTGCGCGAGAAGAATGCCGTTGGCCCCGCCAATTCGGCCCCTGTTCTGAAGTCTATAT  
CGTAACCACACAGCCTCGCCAAATTCGCGACCACCCACGCGTCCTTAGCTTTTCATCTTAAACCCCTTG  
+  
FFFFF:FF:FFFFFFFFFFFFFFFFFFFFFFFFFFFFFFFF,FFFFFF:FFFFFFFF:FFFFFFF  
FFFFF:FFFFFFFFFFFFFFFFFFFFFFFFFFFFFFFFFFFFFFFFFFFFFFFFFFFFFFFFFFFFFFFF,FF  
@A00155:342:HHGFNDSXY:1:1115:29460:10676 2:N:0:GAACCTAG+TCCGCATA  
ATTGACGTCGTTGCGCGAGAAGAATGCCGTTGGCCCCGCCAATTCGGCCCCTGTTCTGAAGTCTATAT  
CGTAACCACACAGCCTCGCCAAATTCGCGACCACCCACGCGTCCTTAGCTTTTCATCTTAAACCCCTTG  
+  
FFFFFFFFFFFFFFFFFFFFFFFFFFFFFFFFFFFFFFFFFFFFFFFFFFFFFFFFFFFFFFFFFFFFFFFF  
FFFFFFFFFFFFFFFFFFFFFFFFFFFFFFFFFFFFFFFFFFFFFFFFFFFFFFFFFFFFFFFFFFFFFFFF  
@A00155:342:HHGFNDSXY:1:1211:8648:34131 1:N:0:GAACCTAG+TCCGCATA  
ACGTCGTTGCGCGAGAAGAATGCCGTTGGCCCCGCCAATTCGGCCCCTGTTCTGAAGTCTATATCGTA  
ACCACACAGCCTCGCCAAATTCGCGACCACCCACGCGTCCTTAGCTTTTCATCTTAAACCCCTTGCGTG  
+  
FFFFFFFFFFFFFFFFFFFFFFFFFFFFFFFFFFFFFFFF:FFFFF:FFFFFFFFFFFFF  
FFFFFFFFFFFFFFFFFFFFFFFFFFFFFFFFFFFFFFFFFFFFFFFFFFFFFFFFFFFFFFFFFFFFFFFF  
@A00155:342:HHGFNDSXY:1:2359:5556:24862 1:N:0:GAACCTAG+TCCGCATA  
ACGTCGTTGCGCGAGAAGAATGCCGTTGGCCCCGCCAATTCGGCCCCTGTTCTGAAGTCTATATCGTA  
ACCACACAGCCTCGCCAAATTCGCGACCACCCACGCGTCCTTAGCTTTTCATCTTAAACCCCTTGCGTG  
+  
FFFFFFFFFFFFFFFF:FFFFFFFFFFFFFFFF:FFFFFFFFFFFFFFFF:FFFFFFFFFFFFF  
FFFFFFFFFFFFFFFF:FFFFFFFF:FFFFFFFFFFFFFFFFFFFFFFFFFFFFFFFF:FF



[illegible]

@A00155:342:HHGFNDSXY:1:2426:21486:16939 2:N:0:GAACCTAG+TCCGCATA  
CCCCGCCAATTCGGCCCCTGTTCTGAAGTCTATATCGTAACCACACAGCCTCGCCAAATTCACGACCA  
CCCACGCGTCCTTAGCTTTCATCTTAAACCCCTTGCGTGTTAGCTCTCCCATTCCTGGGTCAATCACG  
+  
FFFFFFFF:FFFFFFFFFFFFFFFFFFFFFFFF,FFFFFFFFFFFFFFFFFFFFFFFFFFFFFFFF  
FFFFFFFFFFFFFFFF:FFFFFFFFFFFFFFFF:FFFFFFFFFFFFFFFFFFFFFFFFFFFFFFFF,FFFFFFFFFFFFFFFF  
@A00155:342:HHGFNDSXY:1:1536:28483:25363 2:N:0:GAACCTAG+TCCGCATA  
CCCCGCCAATTCGGCCCCTGTTCTGAAGTCTATATCGTAACCACACAGCCTCGCCAAATTCGCGACCA  
CCCACGCGTCCTTAGCTTTCATCTTAAACCCCTTGCGTGTTAGCTCTCCCATTCCTGGGTCAATCACG  
+  
FFFFFFFF::FFFFFFFFFFFFFFFFFFFFFFFF:FFFFFFFFFFFFFFFF:FFFFFFFFFFFFFFFF  
FFFFFFFFFFFFFFFF:FFFFFFFFFFFFFFFF:FFFF::FFFFFFFF:FFFFFFFFFFFFFFFF  
@A00155:342:HHGFNDSXY:1:1554:14904:6574 2:N:0:GAACCTAG+TCCGCATA  
CGCCAATTCGGCCCCTGTTCTGAAGTCTATATCGTAACCACACAGCCTCGCCAAATTCGCGACCA  
ACGCGTCCTTAGCTTTCATCTTAAACCCCTTGCGTGTTAGCTCTCCCATTCCTGGGTCAATCACGCT  
+  
FFFFFFFFFFFFFFFFFFFFFFFFFFFFFFFF:FFFFFFFFFFFFFFFFFFFFFFFFFFFFFFFF  
FFFFFFFFFFFFFFFFFFFFFFFFFFFFFFFFFFFFFFFFFFFFFFFFFFFFFFFF:FFFFFFFFFFFFFFFF  
@A00155:342:HHGFNDSXY:1:1466:22661:30906 2:N:0:GAACCTAG+TCCGCATA  
CAATTCGGCCCCTGTTCTGAAGTCTATATCGTAACCACACAGCCTCGCCAAATTCGCGACCA  
CGTCCTTAGCTTTCATCTTAAACCCCTTGCGTGTTAGCTCTCCCATTCCTGGGTCAATCACGCC  
+  
FFF:FFFFFFFFFFFFFFFF:FFFFFFFFFFFFFFFFFFFFFFFFFFFFFFFF:FFFFFFFF:FF  
FFFFFFFFFFFFFFFFFFFFFFFF:FFFFFFFFFFFFFFFFFFFFFFFFFFFFFFFFFFFFFFFF,FFFF  
@A00155:342:HHGFNDSXY:1:2540:7455:14403 2:N:0:GAACCTAG+TCCGCATA  
CAATTCGGCCCCTGTTCTGAAGTCTATATCGTAACCACACAGCCTCGCCAAATTCGCGACCA  
CGTCCTTAGCTTTCATCTTAAACCCCTTGCGTGTTAGCTCTCCCATTCCTGGGTCAATCACGCC  
+  
FFF:FFFF:FFFFFFFF:FFFFFFFF:FFFF:FFFFFFFFFFFFFFFFFFFFFFFFFFFFFFFF  
FFFFFFFF:FFFF,FFFFFFFFFFFFFFFF:FFFF:FFFFFFFFFFFFFFFFFFFFFFFF  
@A00155:342:HHGFNDSXY:1:1218:15745:27132 2:N:0:GAACCTAG+TCCGCATA  
CAATTCGGCCCCTGTTCTGAAGTCTATATCGTAACCACACAGCCTCGCCAAATTCGCGACCA  
CGTCCTTAGCTTTCATCTTAAACCCCTTGCGTGTTAGCTCTCCCATTCCTGGGTCAATCACGCC  
+  
FFFFFFFFFFFFFFFFFFFFFFFFFFFFFFFF,FFFF,FFFFFFFFFFFFFFFFFFFFFFFF:FFFFFFFF:FF  
FFFFFFFF:FFFFFFFF:FFFFFFFFFFFFFFFFFFFFFFFF,FF,:FF:FFFFFFFF  
@A00155:342:HHGFNDSXY:1:2125:5050:20635 2:N:0:GAACCTAG+TCCGCATA  
CGGCCCTGTTCTGAAGTCTATATCGTAACCACACAGCCTCGCCAAATTCGCGACCA  
TTAGCTTTCATCTTAAACCCCTTGCGTGTTAGCTCTCCCATTCCTGGGTCAATCACGCCTTCAGGTT  
+  
FFFFFFFFFFFFFFFFFFFFFFFF,FFFFFFFF:FFFFFFFFFFFFFFFF:FFFFFFFFFFFFFFFF:FFFFFFFF  
FFFF:FFFFFFFFFFFFFFFFFFFFFFFFFFFFFFFF:FFFFFFFFFFFFFFFFFFFFFFFF  
@A00155:342:HHGFNDSXY:1:1524:12888:11350 2:N:0:GAACCTAG+TCCGCATA  
CGGCCCTGTTCTGAAGTCTATATCGTAACCACACAGCCTCGCCAAATTCGCGACCA  
TTAGCTTTCATCTTAAACCCCTTGCGTGTTAGCTCTCCCATTCCTGGGTCAATCACGCCTTCAGGTT  
+  
FFFFFFFFFFFFFFFFFFFFFFFFFFFFFFFFFFFFFFFFFFFFFFFFFFFFFFFFFFFFFFFF  
FFFFFFFFFFFFFFFFFFFFFFFFFFFFFFFFFFFFFFFFFFFFFFFFFFFFFFFFFFFFFFFF  
@A00155:342:HHGFNDSXY:1:1262:14579:27054 1:N:0:GAACCTAG+TCCGCATA  
CCCCTGTTCTGAAGTCTATATCGTAACCACACAGCCTCGCCAAATTCGCGACCA  
GCTTTCATCTTAAACCCCTTGCGTGTTAGCTCTCCCATTCCTGGGTCAATCACGCCTTCAGGTTAA  
+  
F:FFFFFFFFFFFFFFFFFFFFFFFFFFFFFFFFFFFFFFFFFFFFFFFFFFFFFFFF  
FFFFFFFFFFFFFFFF:FFFFFFFFFFFFFFFF:FFFFFFFFFFFFFFFF:FFF

[illegible]



@A00155:342:HHGFNDSXY:1:2338:17490:21480 1:N:0:GAACCTAG+TCCGCATA  
TCGTAACCACACAGCCTCGCCAAATTCGCGACCACCCACGCGTCCTTAGCTTTTCATCTTAAACCCCTT  
GCGTGTTAGCTCTCCCATTCCTGGGTCAATCACGCCTTTCAGGTTAAAAGGTGAGGCAT

+

FFFFFFFFFFFFFFFFFFFFFFFFFFFFFFFFFFFFFFFFFFFFFFFFFFFFFFFFFFFFFFFFFFFFFFFF  
FFFFFFFFFFFFFFFFFFFF,FFF,FFFFFFFFFFFFFFFFFFFFFFFFFFFFFFFFFFFFFFFFFFFFFFFF

@A00155:342:HHGFNDSXY:1:1503:2980:9189 1:N:0:GAACCTAG+TCCGCATA  
TAACCACACAGCCTCGCCAAATTCGCGACCACCCACGCGTCCTTAGCTTTTCATCTTAAACCCCTTGCG  
TGTTAGCTCTCCCATTCCTGGGTCAATCACGCCTTTCAGGTTAAAAGGTGACGCATATGGGAATGGAT

+

FFFFFFFFFFFFFFFFFFFFFFFFFFFFFFFFFFFFFFFFFFFFFFFFFFFFFFFFFFFFFFFFFFFFFFFF  
F:FFFFFFFFFFFFFFFFFFFFFFFFFFFFFFFFFFFFFFFFFFFFFFFFFFFFFFFFFFFFFFFFFFFFFFFF

@A00155:342:HHGFNDSXY:1:1429:12762:21089 1:N:0:GAACCTAG+TCCGCATA  
TAACCACACAGCCTCGCCAAATTCGCGACCACCCACGCGTCCTTAGCTTTTCATCTTAAACCCCTTGCG  
TGTTAGCTCTCCCATTCCTGGGTCAATCACGCCTTTCAGGTTAAAAGGTGACGCATATGGGAATGGAT

+

FFFFFFFFFFFFFFFFFFFFFFFFFFFFFFFFFFFFFFFFFFFFFFFFFFFFFFFFFFFFFFFFFFFFFFFF  
FFFFFFFFFFFFFFFFFFFF,FFFFFFFFFFFFFFFFFFFFFFFFFFFFFFFFFFFFFFFFFFFFFFFFFFFF

@A00155:342:HHGFNDSXY:1:2602:30951:24471 2:N:0:GAACCTAG+TCCGCATA  
CACAGCCTCGCCAAATTCGCGACCACCCACGCGTCCTTAGCTTTTCATCTTAAACCCCTTGCGTGTTAG  
CTCTCCCATTCCTGGGTCAATCACGCCTTTCAGGTTAAAAGGTGACGCATATGGGAAGGATTTAAGG

+

FFFFFFFFFFFFFFFFFFFFFFFFFFFFFFFFFFFFFFFFFFFFFFFFFFFFFFFFFFFFFFFFFFFFFFFF  
FFFFFFFFFFFFFFFFFFFFFFFFFFFFFFFFFFFFFFFFFFFFFFFFFFFFFFFFFFFFFFFFFFFFFFFF

@A00155:342:HHGFNDSXY:1:1471:29152:2691 2:N:0:GAACCTAG+TCCGCATA  
CACAGCCTCGCCAAATTCGCGACCACCCACGCGTCCTTAGCTTTTCATCTTAAACCCCTTGCGTGTTAG  
CTCTCCCATTCCTGGGTCAATCACGCCTTTCAGGTTAAAAGGTGACGCATATGGGAATGGATTTAAGG

+

F:FF:FFF,FF:,FF:FF:FFF:FFFF:FFFFFFFFFFFF:,FFFF:F:FFFFFFFF:FFFFFFFFFFFF  
FFFFFFFF:F::F:FFFF:,FFF,F:FFFFFFFFFFFFFFFF:FFFFFFFFFFFFFFFF,FFFFFFFF:F:

@A00155:342:HHGFNDSXY:1:1610:20347:8328 2:N:0:GAACCTAG+TCCGCATA  
CACAGCCTCGCCAAATTCGCGACCACCCACGCGTCCTTAGCTTTTCATCTTAAACCCCTTGCGTGTTAG  
CTCTCCCATTCCTGGGTCAATCACGCCTTTCAGGTTAAAAGGTGACGCATATGGGAATGGATTTAAGG

+

FFFF:FFFFFFFFFFFFFFFFFFFFFFFFFFFFFFFFFFFFFFFF:FFF,FF,FFFFFFFFFF:FFFFFFFFFF  
FFFFFFFF,FFFFFFFFFFFFFFFFFFFFFFFFFFFFFFFFFFFFFFFFFFFFFFFFFFFFFFFFFFFFFFFF

@A00155:342:HHGFNDSXY:1:1472:7374:31015 2:N:0:GAACCTAG+TCCGCATA  
ACAGCCTCGCCAAATTCGCGACCACCCACGCGTCCTTAGCTTTTCATCTTAAACCCCTTGCGTGTTAGC  
TCTCCCATTCCTGGGTCAATCACGCCTTTCAGGTTAAAAGGTGACGCATATGGGAATGGATTTAAGGG

+

FFFFFFFFFFFFFFFF:FFFFFFFFFFFF:FFFFFFFFFFFFFFFFFFFFFFFFFFFFFFFFFFFFFFFF:FFFF  
FFFFFF,FFFFFFFFFFFF:FFFFFFFFFFFFFFFFFFFFFFFFFFFFFFFFFFFFFFFF:FFFFFFFFFFFFFFFF

@A00155:342:HHGFNDSXY:1:2425:32642:11866 2:N:0:GAACCTAG+TCCGCATA  
ACAGCCTCGCCAAATTCGCGACCACCCACGCGTCCTTAGCTTTTCATCTTAAACCCCTTGCGTGTTAGC  
TCTCCCATTCCTGGGTCAATCACGCCTTTCAGGTTAAAAGGTGACGCATATGGGAATGGATTTAAGGG

+

F::FFFF:FFFFFFFFFFFFFFFFFFFFFFFFFFFFFFFFFFFFFFFF:FFFFFF:FFFFFFFFFF:FFFF:FFFF  
FFFFFF:FFFFFFFFFFFF,FFFFFFFFFFFFFFFFFFFFFFFFFFFFFFFFFFFFFFFFFFFFFFFFFFFF

@A00155:342:HHGFNDSXY:1:1354:29044:16939 2:N:0:GAACCTAG+TCCGCATA  
ACAGCCTCGCCAAATTCGCGACCACCCACGCGTCCTTAGCTTTTCATCTTAAACCCCTTGCGTGTTAGC  
TCTCCCATTCCTGGGTCAATCACGCCTTTCAGGTTAAAAGGTGACGCATATGGGACTGGATTTAAGGG

+

FFFFFFFFFFFFFFFFFFFFFFFFFFFFFFFFFFFFFFFFFFFFFFFFFFFFFFFFFFFFFFFFFFFF,F,FFFF  
FFFFFFFFFFFFFFFFFFFF,FFFFFFFF:FFFF:F,:FFFFFFFFF:FFFFFF,FFFF:FFFFFF

@A00155:342:HHGFNDSXY:1:1519:17589:30545 2:N:0:GAACCTAG+TCCGCATA  
ACAGCCTCGCCAAATTCGCGACCACCCACGCGTCCTTAGCTTTTCATCTTAACCCCTTGCGGTGTTAGC  
TCTCCCATTCTGGGTCAATCACGCCTTTCAGGTTAAAAGGTGACGCATATGGGAATGGATTAAAGGG  
+  
FFFFFFFFFFFFFFFFFFFFFFFFFFFFFFFFFFFFF:FFFFFFFF:FF:FFFFFF::FFFFFFFFFFFFFFFFFFFFFFFF  
FFFFFFFF:FFF:FFFFFFFFFFFFFFFFFFFFFFFFFFFFFFFFFFFFFFFFFFFFFFFFFFFFFFFFFFFFFFFF  
@A00155:342:HHGFNDSXY:1:1354:29044:16939 1:N:0:GAACCTAG+TCCGCATA  
CAGCCTCGCCAAATTCGCGACCACCCACGCGTCCTTAGCTTTTCATCTTAACCCCTTGCGGTGTTAGCT  
CTCCCATTCTGGGTCAATCACGCCTTTCAGGTTAAAAGGTGACGCATATGGGAATGGATTAAAGGGC  
+  
FFFFFFFFFFFFFFF:FFFFFFFFFFFFFFF:FFFFFFFFF:FFFFFFFFFFFFFFF:FFFFFFFFFFFFFFF  
FFFFFF::FFFFFFFFF:FF:FFF,FFFFFFFFFFFFFFFFFFFFFFFFFFFFFFFFFFFFFFFFFFFFFFFFF  
@A00155:342:HHGFNDSXY:1:2116:31864:27868 1:N:0:GAACCTAG+TCCGCATA  
CTCGCCAAATTCGCGACCACCCACGCGTCCTTAGCTTTTCATCTTAACCCCTTGCGGTGTTAGCTCTC  
CATTCCTGGGTCAATCACGCCTTTCAGGTTAAAAGGTGACGCATATGGGAATGGATTAAAGGGCATG  
+  
FFFFFFFFFFFFFFFFFFFFFFFFFFFFFFFFFFFFFFFFFFFFFFFFFFFFFFFFFFFFFFFFFFFFFFFFFFFFF  
FFF,FFF:FFFFFFFFF:FFFFFFFFFFFF,:FFFFFFFFFFFFF,FFFFFFF:FFFFFFFFFFFFFF:F  
@A00155:342:HHGFNDSXY:1:2262:32560:21339 1:N:0:GAACCTAG+TCCGCATA  
CTCGCCAAATTCGCGACCACCCACGCGTCCTTAGCTTTTCATCTTAACCCCTTGCGGTGTTAGCTCTC  
CATTCCTGGGTCAATCACGCCTTTCAGGTTAAAAGGTGACGCATATGGGAATGGATTAAAGGGCATG  
+  
FFFFFFFFFFFFFFFFFFFFFFFFFFFFFFFFFFFFFFFFFFFFFFFFFFFFFFFFFFFFFFFFFFFFFFFFFFFFF  
F:F:FF,FFFFFF:FFFFFFFFF,:FFFFF:FFFFFFFFFFFFFFFFFFFFFFFFF:FFFF:F:FFFFFF,:F  
@A00155:342:HHGFNDSXY:1:1659:14190:18834 2:N:0:GAACCTAG+TCCGCATA  
CGCCAAATTCGCGACCACCCACGCGTCCTTAGCTTTTCATCTTAACCCCTTGCGGTGTTAGCTCTCCA  
TTCTCTGGGTCAATCACGCCTTTCAGGTTAAAAGGTGACGCATATGGGAATGGATTAAAGG  
+  
FFFFFFFFFFFFFFFFFFFFFFFFFFFFFFFFFFFFFFFFFFFFFFFFFFFFFFFFFFFFFFFFFFFFFFFFFFFFF  
,FFFFFFFFFFFFF:,FFFFFFFFFFFFFFFFFFFFFFFFFFFFFFFFFFFFFFFFFFFFFFFFFFFFFFFFFFFFF  
@A00155:342:HHGFNDSXY:1:2463:6262:20447 2:N:0:GAACCTAG+TCCGCATA  
ATTCGCGACCACCCACGCGTCCTTAGCTTTTCATCTTAACCCCTTGCGGTGTTAGCTCTCCCATTCTG  
GGTCAATCACGCCTTTCAGGTTAAAAGGTGACGCATATGGGAATGGATTAAAGGGCATGGCCAGTGTG  
+  
FFFFF,FFFFFFFFF:FFFFFFFFFFFF,F:FFFFFFFFFFFFFFFFF,F:FFFF:FF::FFFFFFFF:FFFFF  
FFFFFFFF:FFFFFFFFFFFFFFF,FFFFFFFFFFFFFFFFFFFFF:FF:FFFFFFFFFFFFFFFFFFFFFFFFF  
@A00155:342:HHGFNDSXY:1:1503:2980:9189 2:N:0:GAACCTAG+TCCGCATA  
ATTCGCGACCACCCACGCGTCCTTAGCTTTTCATCTTAACCCCTTGCGGTGTTAGCTCTCCCATTCTG  
GGTCAATCACGCCTTTCAGGTTAAAAGGTGACGCATATGGGAATGGATTAAAGGGCATGGCCAGTGTG  
+  
FFFFFFFFFFFFFFFFFFFFF:FFFFFFF:FFFFFFFFFFFFFFFFFFFFFFFFFFFFFFFFFFFFFFFFFFFFF  
FFFFFFFFFFFFFFFFFFFFFFFFFFFFFFFFFFFFFFFFFFFFFFFFFFFFFFFFFFFFFFFFFFFFFFFFFFFFF  
@A00155:342:HHGFNDSXY:1:2359:5556:24862 2:N:0:GAACCTAG+TCCGCATA  
TTCGCGACCACCCACGCGTCCTTAGCTTTTCATCTTAACCCCTTGCGGTGTTAGCTCTCCCATTCTGG  
GTCAATCACGCCTTTCAGGTTAAAAGGTGACGCATATGGGAATGGATTAAAGGGCATGGCCAGTGTG  
+  
FFFFFFFFFFFFFFFFFFFFFFFFFFFFFFFFFFFFFFFFFFFFFFFFFFFFFFFFFFFFFFFFFFFFFFFFFFFFF  
FFFFFFFFFFFFFFFFFFFFF,FFFFFFFFFFFFFFFFFFFFFFFFFFFFFFFFFFFFFFFFFFFFFFFFFFFFF  
@A00155:342:HHGFNDSXY:1:1211:8648:34131 2:N:0:GAACCTAG+TCCGCATA  
TTCGCGACCACCCACGCGTCCTTAGCTTTTCATCTTAACCCCTTGCGGTGTTAGCTCTCCCATTCTGG  
GTCAATCACGCCTTTCAGGTTAAAAGGTGACGCATATGGGAATGGATTAAAGGGCATGGCCAGTGTG  
+

[illegible]

[illegible]

@A00155:342:HHGFNDSXY:1:2262:32560:21339 2:N:0:GAACCTAG+TCCGCATA  
CTTTCAGGTTAAAAGGTGACGCATATGGGAATGGATTTAAGGGCATGGCCAGTGTTCGGTACACCCGCA  
AACGGTATCCATGTTAATCTCACCGCTAGCTTCTCTTCTCCCTCTTCTATCTCCTGCTCCTCCAGTAT  
+  
FFFFFFFFFFFFFFFF:FFFFFFFF:FFF,FFFF:FFFFFFFFFFFFFFFFFFFFFFFFFFFFF  
:FFFFFFFFFFFFFFFFFFFFFFFF:FFFF,FFFF:FFFFFFFFFFFF:FFFFFFFFFFFFFFFFFFFFF:  
@A00155:342:HHGFNDSXY:1:2116:31864:27868 2:N:0:GAACCTAG+TCCGCATA  
CTTTCAGGTTAAAAGGTGACGCATATGGGAATGGATTTAAGGGCATGGCCAGTGTTCGGTACACCCGCA  
AACGGTATCCATGTTAATCTCACCGCTAGCTTCTCTTCTCCCTCTTCTATCTCCTGCTCCTCCAGTAT  
+  
FFFFFFFFFFFFFFFFFFFFFFFF:FFFFFF:F:F:FFFFFFFFFFFFFFFFFFFFFFFFFFFFFFFFF:  
FFFFFFFFFFFFFFFFFFFFFFFFFFFFFFFF:FFFFFFFFFFFFFFFFFFFFFFFFFFFFF:FFFF:FFF:  
@A00155:342:HHGFNDSXY:1:1210:6822:17190 2:N:0:GAACCTAG+TCCGCATA  
TTTCAGGTTAAAAGGTGACGCATATGGGAATGGATTTAAGGGCATGGCCAGTGTTCGGTACACCCGCA  
ACGGTATCCATGTTAATCTCACCGCTAGCTTCTCTTCTCCCTCTTCTATCTCCTGCTCCTCCAGTATT  
+  
FFFFFFFFFFFFFFFFFFFFFFFF:FFFFFF:FFFFFFFFFFFF:FFFFFFFFFFFFFFFFFFFFFFFFFFFF  
FFFFFFFFFFFFFFFFFFFFFFFFFFFFFFFFFFFFFFFF:FFFFFF:FFFF:FFFFFFFFFFFF:FF:FFFF  
@A00155:342:HHGFNDSXY:1:1233:13395:17268 1:N:0:GAACCTAG+TCCGCATA  
AAGGTGACGCATATGGGAATGGATTTAAGGGCATGGCCAGTGTTCGGTACACCCGCAAACGGTATCCAT  
GTTAATCTCACCGCTAGCTTCTCTTCTCCCTCTTCTATCTCCTGCTCCTCCAGTATTGCATCTTCTCT  
+  
FFFFFFFFFFFFFFFFFFFFFFFFFFFFFFFF:FFFFFFFFFFFFFFFFFFFFFFFFFFFFF:FFFFFFFFFFFF  
FFFFFFFFFFFFFFFFFFFFFFFFFFFFFFFFFFFFFFFFFFFFFFFFFFFFFFFFFFFFFFFFFFFFFFFFF  
@A00155:342:HHGFNDSXY:1:1311:30653:34945 1:N:0:GAACCTAG+TCCGCATA  
AAGGTGACGCATATGGGAATGGATTTAAGGGCATGGCCAGTGTTCGGTACACCCGCAAACGGTATCCAT  
GTTAATCTCACCGCTAGCTTCTCTTCTCCCTCTTCTATCTCCTGCTCCTCCAGTATTGCATCTTCTCT  
+  
FFFFFFFFFFFFFFFFFFFFFFFFFFFFFFFFFFFFFFFF:FFFFFFFFFFFFFFFFFFFFFFFFFFFFFFFFF  
FFFFFFFFFFFFFFFFFFFFFFFFFFFFFFFFFFFFFFFFFFFFFFFFFFFFFFFFFFFFFFFFFFFFFFFFF  
@A00155:342:HHGFNDSXY:1:2365:30038:17127 2:N:0:GAACCTAG+TCCGCATA  
CATATGGGAATGGATTTAAGGGCATGGCCAGTGTTCGGTACACCCGCAAACGGTATCCATGTTAATCTC  
ACCGCTAGCTTCTCTTCTCCCTCTTCTATCTCCTGCTCCTCCAGTATTGCATCTTCTCTAGCTGCCAT  
+  
FFFFFFFFFFFFFFFFFFFF:F,FFFFFFFFFFFFFFFFFFFFFFFFFFFFFFFFFFFFFFFFFFFFFFFFF  
FFFFF,FFF,FFFFFFFFFFFF:FFFF:FFFFFFFFFFFF:FFFFF:FFF,FFFFFFFFFFFFFFFFF  
@A00155:342:HHGFNDSXY:1:2569:26449:7028 2:N:0:GAACCTAG+TCCGCATA  
CATATGGGAATGGATTTAAGGGCATGGCCAGTGTTCGGTACACCCGCAAACGGTATCCATGTTAATCTC  
ACCGCTAGCTTCTCTTCTCCCTCTTCTATCTCCTGCTCCTCCAGTATTGCATCTTCTCTAGCTGCCAT  
+  
F:F:FFFFFFFFFFFFFFFFFFFFFFFFFFFFFFFFFFFFFFFF:FFF:FFFFFFFFFFFFFFFFFFFFF  
FFFFFFFFFFFFFFFFFFFFFFFFFFFFFFFF,FFFFFFFFFFFFFFFFFFFFFFFFFFFFF,FFFFFFFFFFFF  
@A00155:342:HHGFNDSXY:1:1358:28465:9392 2:N:0:GAACCTAG+TCCGCATA  
GGAATGGATTTAAGGGCATGGCCAGTGTTCGGTACACCCGCAAACGGTATCCATGTTAATCTCACCGCT  
AGCTTCTCTTCTCCCTCTTCTATCTCCTGCTCCTCCAGTATTGCATCTTCTCTAGCTGCCATCTCGTC  
+  
FFFFFFFFFFFFFFFFFFFFFFFFFFFFFFFFFFFFFFFFFFFFFFFFFFFFFFFFFFFFFFFFFFFFFFFFF  
FFFFFFFFFFFFFFFFFFFFFFFFFFFFFFFFFFFFFFFFFFFFFFFFFFFFFFFFFFFFFFFFFFFFFFFFF  
@A00155:342:HHGFNDSXY:1:1251:3839:29027 2:N:0:GAACCTAG+TCCGCATA  
GGAATGGATTTAAGGGCATGGCCAGTGTTCGGTACACCCGCAAACGGTATCCATGTTAATCTCACCGCT  
AGCTTCTCTTCTCCCTCTTCTATCTCCTGCTCCTCCAGTATTGCATCTTCTCTAGCTGCCATCTCGTC  
+  
FFF:FFFFFFFF:FFFFFF:FFFFFFFFFFFFFFFFFFFFFFFFFFFFFFFFFFFFFFFFFFFFFFFFF  
FFFFFFFF:FFFFFFFFFFFF:FFFFFFFFFFFFFFFFFFFFFFFFFFFFFFFFFFFFFFFFFFFFFFFFF

```
@A00155:342:HHGFNDSXY:1:2628:11532:27665 2:N:0:GAACCTAG+TCCGCATA  
GGAATGGATTTAAGGGCATGGCCAGTGTCGGTACACCCGCAAACGGTATCCATGTTAATCTCACCGCT  
AGCTTCTCTTCTCCCTCTTCTATCTCCTGCTCCTCCAGTATTGCATCTTCTCTAGCTGCCATCTCGTC  
+  
FFFFFFFFFFFFFFFFFFFFFFFFFFFFFFFFFFFFFFFFFFFFFFFFFFFFFFFFFFFFF:FFFFFFFFFFFFF  
FFFFFFFFFFFFFFFFFFFFFFFFFFFFFFFFFFFFFFFFFFFFFFFFFFFFFFFFFFFFF  
@A00155:342:HHGFNDSXY:1:1357:13277:11240 2:N:0:GAACCTAG+TCCGCATA  
GGAATGGATTTAAGGGCATGGCCAGTGTCGGTACACCCGCAAACGGTATCCATGTTAATCTCACCGCT  
AGCTTCTCTTCTCCCTCTTCTATCTCCTGCTCCTCCAGTATTGCATCTTCTCTAGCTGCCATCTCGTC  
+  
FFFFFFFFFFFFFFFFFFFFFFFFFFFFFFFFFFFFFFFFFFFFFFFFFFFFFFFFFFFFF:FFFFFFFFFFFFF  
FFFFFFFFFFFFFFFFFFFFFFFFFFFFFFFFFFFFFFFFFFFFFFFFFFFFFFFFFFFFF  
@A00155:342:HHGFNDSXY:1:1233:13395:17268 2:N:0:GAACCTAG+TCCGCATA  
AATGGATTTAAGGGCATGGCCAGTGTCGGTACACCCGCAAACGGTATCCATGTTAATCTCACCGCTAG  
CTTCTCTTCTCCCTCTTCTATCTCCTGCTCCTCCAGTATTGCATCTTCTCTAGCTGCCATCTCGTCGC  
+  
FFFFFFFFFFFFFFFFFFFFFFFFFFFFFFFFFFFFFFFFFFFFFFFFFFFFFFFFFFFFF  
F,FFFFFFFFFFFFFFFFFFFFFFFFFFFFFFFFFFFFFFFFFFFFFFFFFFFFFFFFFFFFF  
@A00155:342:HHGFNDSXY:1:1311:30653:34945 2:N:0:GAACCTAG+TCCGCATA  
AATGGATTTAAGGGCATGGCCAGTGTCGGTACACCCGCAAACGGTATCCATGTTAATCTCACCGCTAG  
CTTCTCTTCTCCCTCTTCTATCTCCTGCTCCTCCAGTATTGCATCTTCTCTAGCTGCCATCTCGTCGC  
+  
:FFFFFFFFFFFFFFFFFFFFFFFFFFFFFFFFFFFFFFFFFFFFFFFFFFFFFFFFFFFFF  
FFFFFFFFFFFFFFFFFFFFFFFFFFFFFFFFFFFFFFFFFFFFFFFFFFFFFFFFFFFFF,FFFFF:FFFFF  
@A00155:342:HHGFNDSXY:1:1357:13277:11240 1:N:0:GAACCTAG+TCCGCATA  
ATGGATTTAAGGGCATGGCCAGTGTCGGTACACCCGCAAACGGTATCCATGTTAATCTCACCGCTAGC  
TTCTCTTCTCCCTCTTCTATCTCCTGCTCCTCCAGTATTGCATCTTCTCTAGCTGCCATCTCGTCGCC  
+  
:FFFFFFFFFFFFFFF,FFFFFFFFFFFFFFFFFFFFFFFFFFFFFFFFFFFFFFFFFFFFFFFFFFFFF  
FFFFFFFFFFFFFFFFFFFFFFFFFFFFFFFFFFFFFFFFFFFFFFFFFFFFFFFFFFFFF  
@A00155:342:HHGFNDSXY:1:2628:11532:27665 1:N:0:GAACCTAG+TCCGCATA  
GGATTTAAGGGCATGGCCAGTGTCGGTACACCCGCAAACGGTATCCATGTTAATCTCACCGCTAGCTT  
CTCTTCTCCCTCTTCTATCTCCTGCTCCTCCAGTATTGCATCTTCTCTAGCTGCCATCTCGTCGCCGT  
+  
FFFFFFFFFFFFFFFFFFFFFFFFFFFFFFFFFFFFFFFFFFFFFFFFFFFFFFFFFFFFF  
FFFFFFFFFFFFFFFFFFFFFFFFFFFFFFFFFFFFFFFFFFFFFFFFFFFFFFFFFFFFF  
@A00155:342:HHGFNDSXY:1:2520:15700:35540 1:N:0:GAACCTAG+TCCGCATA  
TTAAGGGCATGGCCAGTGTCGGTACACCCGCAAACGGTATCCATGTTAATCTCACCGCTAGCTTCTC  
TCTCCCTCTTCTATCTCCTGCTCCTCCAGTATTGCATCTTCTCTAGCTGCCATCTCGTCGCCGTAAAG  
+  
FFFFFFFFFFFFFFFFFFFFFFFFFFFFFFFFFFFFFFFFFFFFFFFFFFFFFFFFFFFFF:,FFF:F  
FFFFFFFFFFFFFFFFFFFFFFFFFFFFFFFFFFFFFFFFFFFFFFFFFFFFFFFFFFFFF  
@A00155:342:HHGFNDSXY:1:1251:3839:29027 1:N:0:GAACCTAG+TCCGCATA  
GGGCATGGCCAGTGTCGGTACACCCGCAAACGGTATCCATGTTAATCTCACCGCTAGCTTCTTCTC  
CCTCTTCTATCTCCTGCTCCTCCAGTATTGCATCTTCTCTAGCTGCCATCTCGTCGCCGTAAAGTCTA  
+  
FFFF:FFFFFFFFFFFFFFFFFFFFFFFFFFFFFFFFFFFFFFFFFFFFFFFFFFFFF:  
:FFFFF:FFFFFFFFFFFFFFFFFFFFFFFFFFFFFFFFFFFFFFFFFFFFFFFFFFFFF  
@A00155:342:HHGFNDSXY:1:1358:28465:9392 1:N:0:GAACCTAG+TCCGCATA  
GGGCATGGCCAGTGTCGGTACACCCGCAAACGGTATCCATGTTAATCTCACCGCTAGCTTCTTCTC  
CCTCTTCTATCTCCTGCTCCTCCAGTATTGCATCTTCTCTAGCTGCCATCTCGTCGCCGTAAAGTCTA  
+  
FFFF:FFFFFFFFFFFFFFFFFFFFFFFFFFFFFFFFFFFFFFFFFFFFFFFFFFFFF  
FFFFF:FFFFFFFFFFFFFFFFFFFFFFFFFFFFFFFFFFFFFFFFFFFFFFFFFFFFF
```

@A00155:342:HHGFNDSXY:1:2341:11776:18505 1:N:0:GAACCTAG+TCCGCATA  
 TGGCCAGTGTCTCGGTACACCCGCAAACGGTATCCATGTTAATCTCACCGCTAGCTTCTCTTCTCCCTCT  
 TCTATCTCCTGCTCCTCCAGTATTGCATCTTCTCTAGCTGCCATCTCGTCGCCGTTAAGTCTAACC GG  
 +  
 FFFFFFFFFFFFFFFFFFFFFFFFFFFFFFFFFFFFFFFFFFFFFFFFFFFFFFFFFFFFFFFFFFFFFFFFFF,FFFFFFFFFFFFFFF  
 FFFFFFFFFFFFFFFFFFFFFFFFFFFFFFFFFFFFFFFFFFFFFFFFFFFFFFFFFFFFFFFFFFFFFFFFFF  
 @A00155:342:HHGFNDSXY:1:2621:27986:11945 1:N:0:GAACCTAG+TCCGCATA  
 TGGCCAGTGTCTCGGTACACCCGCAAACGGTATCCATGTTAATCTCACCGCTAGCTTCTCTTCTCCCTCT  
 TCTATCTCCTGCTCCTCCAGTATTGCATCTTCTCTAGCTGCCATCTCGTCGCCGTTAAGTCTAACC GG  
 +  
 FFFFFFFFFFFFF:FFFFFFFFFFFFFFFF:FFFFFFFFFFFFFFFFFFFFFFFFFFFFFFFFFFFF,F:FFFFFFF  
 FFF:FFFFFFFFFFFFFFFFFFFFFFFFFFFFFFFFFFFFFFFFFFFFFFFFFFFFFFFFFFFFFFFFFFFF::FFFF  
 @A00155:342:HHGFNDSXY:1:2547:5104:29559 2:N:0:GAACCTAG+TCCGCATA  
 GTACACACGCAAACGGTATCCATGTTAATCTCACCGCTAGCTTCTCTTCTCCCTCTTCTATCTCCTGC  
 TCCTCCAGTATTGCATCTTCTCTAGCTGCCATCTCGTCGCCGTTAAGTCTAACC GGCGCTCGTACTT  
 +  
 ::F,FF,FF,,FFFFFFFF::FF:FFFF:FFFF,FFFFFFFFFFFF:FFFF:FFFFFFFFFFFF:F  
 FFFFFFFFFFFFF:F:FFFFFFFF,FFFFFFFFFFFFFFFF:FFFFFFFFFFFF,FF:FFFF:FFFF:FFF  
 @A00155:342:HHGFNDSXY:1:1610:1407:31548 1:N:0:GAACCTAG+TCCGCATA  
 ACCCGCAAACGGTATCCATGTTAATCTCACCGCTAGGTTCTCTTCTCCCTCTTCTATCTCCTGCTCCT  
 CCAGTATTGCATCTTCTCTAGCTGCCATCTCGTCGCCGTTAAGTCTAACC GGCGCTCGTACTTCTCC  
 +  
 FFFFFFFFFFFFFFFFFFFFFFFFFFFFFFFFFFFFFFFFFFFFF,F,:F:F,,FFFFFFFFFFFFFFFFFFFFFFFFFFFF  
 FFFFFFFFFFFFFFFFFFFFFFFFFFFFFFFFFFFFFFFFFFFFF:F:FFFFFFFFFFFFFFFFFFFFFFFFFFFF  
 @A00155:342:HHGFNDSXY:1:2108:27299:4492 1:N:0:GAACCTAG+TCCGCATA  
 CGCAAACGGTATCCATGTTAATCTCACCGCTAGCTTCTCTTCTCCCTCTTCTATCTCCTGCTCCTCCA  
 GTATTGCATCTTCTCTAGCTGCCATCTCGTCGCCGTTAAGTCTAACC GGCGCTCGTACTTCTCCTTT  
 +  
 FFFFFFFFFFFFFF:FFFFFFFFFFFFFFFFFFFFF:FFFFFFFFFFFFFFFFFFFFFFFFFFFFFFFFFFFFF  
 FFFFFFFFFFFFFFFFFFFFFFFFFFFFFFFFFFFFFFFFFFFFF:FFFFFFFFFFFFFFFF:FFFFFFFFFF  
 @A00155:342:HHGFNDSXY:1:1661:16098:16845 2:N:0:GAACCTAG+TCCGCATA  
 CGCAAACGGTATCCATGTTAATCTCACCGCTAGCTTCTCTTCTCCCTCTTCTATCTCCTGCTCCTCCA  
 GTATTGCATCTTCTCTAGCTGCCATCTCGTCGCCGTTAAGTCTAACC GGCGCTCGTACTTCTCCTTT  
 +  
 FFFFFFFFFFFFFFFFFFFFFFFFFFFFFFFFFFFFFFFFFFFFFFFFFFFFFFFFFFFFFFFFFFFFFFFFFF  
 FFFFFFFFFF,FFFFFFFFFFFFFFFF:FFFFFFFFFFFFFFFFFFFFFFFFFFFFFFFFFFFF,FFFFF:F  
 @A00155:342:HHGFNDSXY:1:2108:28971:2440 1:N:0:GAACCTAG+TCCGCATA  
 CGCAAACGGTATCCATGTTAATCTCACCGCTAGCTTCTCTTCTCCCTCTTCTATCTCCTGCTCCTCCA  
 GTATTGCATCTTCTCTAGCTGCCATCTCGTCGCCGTTAAGTCTAACC GGCGCTCGTACTTCTCCTTT  
 +  
 FFFFFFFFFF:,FFFFFFFF:FFFFFFFFFFFFF:F:FF:,FFFFFFFFFFFFFFFFFFFFFFFFFFFFF  
 FFFFFFFFFFFFFFFFFFFFFFFFFFFFFFFFFFFFFFFFFFFFF:FFFFFFFFFFFFFFFF:FFFFF  
 @A00155:342:HHGFNDSXY:1:2621:27986:11945 2:N:0:GAACCTAG+TCCGCATA  
 CGCAAACGGTATCCATGTTAATCTCACCGCTAGCTTCTCTTCTCCCTCTTCTATCTCCTGCTCCTCCA  
 GTATTGCATCTTCTCTAGCTGCCATCTCGTCGCCGTTAAGTCTAACC GGCGCTCGTACTTCTCCTTT  
 +  
 FFFFFFFFFF:F:FFFF:F,FFFFFFFFF:F:FFF,F:FF:FFFFFFFF,FFFFFFFFFFFFFFFFFFFF:F  
 ,:F:FFFFFFFFFFFFFFFFFFFFFFFFFFFFFFFFFFFF:F:FFFFFFFFFFFFFFFF:FFFFFFFFFFFF,:F  
 @A00155:342:HHGFNDSXY:1:1406:11767:12571 1:N:0:GAACCTAG+TCCGCATA  
 AACGGTATCCATGTTAATCTCACCGCTAGCTTCTCTTCTCCCTCTTCTATCTCCTGCTCCTCCAGTAT  
 TGCATCTTCTCTAGCTGCCATCTCGTCGCCGTTAAGTCTAACC GGCGCTCGTACTTCTCCTTTACAG  
 +  
 FF:F,FFFFFFFFFFFF:FF:FFFF,FF,F:,FF,F,FFFFF:FF:FFFF,F,FFFF:FFFFFFFF:FF  
 FFFF::FFF:FFFFFFFFFF:FF,,:FF:FF,FFF,FFFFF::FFFFFFFF:FFFF:,FFFFFFFF:FFF:

@A00155:342:HHGFNDSXY:1:1661:16098:16845 1:N:0:GAACCTAG+TCCGCATACGGTATCCATGTTAATCTCACCGCTAGCTTCTTCTCCCTCTTCTATCTCCTGCTCCTCCAGTATTGCATCTTCTCTAGCTGCCATCTCGTCGCCGTTAAGTCTAACC GGCCGCTCGTACTTCTCCTTTAC

[illegible]

@A00155:342:HHGFNDSXY:1:1674:14877:1110 1:N:0:GAACCTAG+TCCGCATA  
CATGTTAATCTCACCGCTAGCTTCTCTTCTCCCTCTTCTATCTCCTGCTCCTCCAGTATTGCATCTTC  
TCTAGCTGCCATCTCGTCGCCGTTAAGTCTAACCGGCCGCTCGTACTTCTCCTTTACAGATATAATTT

```

FFFFFFFFFFFFFFFFFFFFFFFF,FFFFFFFFFFFFFFFFFFFFFFFFFFFFFFFFFFFFFFFFFFFFFFFF:FFF
FFFFFFFFFFFFFFFFFFFFFFFFFFFFFFFFFFFFFFFF:FFFFFFFFFFFFFFFFFFFFFFFFFFFFFFFF:;FFFFFFFFFFFFFFFF

```

@A00155:342:HHGFNDSXY:1:1610:1407:31548 2:N:0:GAACCTAG+TCCGCATA  
ACCGCTAGCTTCTCTTCTCCCTCTTCTATCTCCTGCTCCTCCAGTATTGCATCTTCTCTAGCTGCCAT  
CTCGTCGCCGTTAAGTCTAACCGGCCGCTCGTACTTCTCCTTTACAGATATAATTTCTTATGATATT

[illegible]

@A00155:342:HHGFNDSXY:1:1466:24415:19288 2:N:0:GAACCTAG+TCCGCATA  
GCTAGCTTCTCTTCTCCCTCTTCTATCTCCTGCTCCTCCAGTATTGCATCTTCTCTAGCTGCCATCTC  
GTCGCCGTAAAGTCTAACCGGCCGCTCGTACTTCTCCTTTACAGATATAATTTCTTATG

[illegible]

```
FFFFFFFFFFFFFFFFFFFFFFFFFFFFFFFFFFFFFFFFFFFFF,FFFFFFFFFFFFFFFFFFFFFFFFF  
@A00155:342:HHGFNDSXY:1:2155:25400:22623 1:N:0:GAACCTAG+TCCGCATA
```

GCTAGCTTCTCTTCTCCCTCTTCTATCTCCTGCTCCTCCAGTATTGCATCTTCTCTAGCTGCCATCTC  
GTCGCCGTTAAGTCTAACCGGCCGCTCGTACTTCTCCTTTACAGATATAATTTCTTATGATATTTTA  
+

[illegible]

@A00155:342:HHGFNDSXY:1:2520:32606:30248 1:N:0:GAACCTAG+TCCGCATA  
AGCTTCTCTTCTCCCTCTTCTATCTCCTGCTCCTCCAGTATTGCATCTTCTCTAGCTGCCATCTCGTC  
GCCGTTAAGTCTAACCGGCCGCTCGTACTTCTCCTTTACAGATATAATTTCTTATGATATTTTAAAC

```

+
FFF,;FFFFFFFFFFFFFFFFFFFF;FFFFFFF;FFFFFFFF;FFF,FF;FF,FFFF;FF;FFFF;FFFF

```

FFFF:FFFFFFFF:FFFFFFFFFFFFFFFF,FFFF,FFF:FFF::FFFFFFFFFFFF::FFFFFFF  
@A00155:342:HHGFNDSXY:1:1266:22272:1642 1:N:0:GAACCTAG+TCCGCATA

TTCTCCCTCTTCTATCTCCTGCTCCTCCAGTATTGCATCTTCTCTAGCTGCCATCTCGTCGCCGTAA  
GTCTAACCGGCCGCTCGTACTTCTCCTTTACAGATATAATTTCTTATGATATTTTAACTTCTTTACC  
+

```

FFFFFFFF,FFFFFF::FF::FF::FFFFFFFF::FF,F,,FFFFFFFF::FFF:F,,:F:F:F::F::FF::F
F::F:FF,,F:FFF:FFFFFFFFFFFF:F,F:F:F:FFF:FF:F,FFF:FFFF:FFFFFFFFF,FFFFFF,,

```

@A00155:342:HHGFNDSXY:1:1466:24415:19288 1:N:0:GAACCTAG+TCGCATA  
CCCTCTTCTATCTCCTGCTCCTCCAGTATTGCATCTTCTCTAGCTGCCATCTCGTCGCCGTTAAGTCT  
AACCGGCCGCTCGTACTTCTCCTTTACAGATATAATTTCTTATGATATTTTAACTTCTT

```
+
FFFFFFFFFFFFFFFFFFFFFFFFFFFFFFFF;FFFFFFFFF;FFFFFFFFFFFF;FFFFFFFFFFFFFFFFFFFFFFFF
```

```

FFFFFFFFFFFFFFFFFFFFFFFFFFFFFFFFFFFFFFFFFFFFFFFFFFFFFFFFFFFFFFFF
@A00155:342:HHGFNDSXY:1:2108:27299:4492 2:N:0:GAACCTAG+TCCGCATA

```

CCCTCTTCTATCTCCTGCTCCTCCAGTATTGCATCTTCTCTAGCTGCCATCTCGTCGCCGTTAAGTCT  
AACCGGCCGCTCGTACTTCTCCTTTACAGATATAATTTCTTATGATATTTTAACTTCTTTACCATT

```

+
FFFFFFFFFFFFFFFFFFFFFFFFFFFFFFFF,FF,FFFFFFFFFFFFFFFFFFFFFFFFFFFFFFFFFFFFFFFF

```

[illegible]



@A00155:342:HHGFNDSXY:1:2108:28971:2440 2:N:0:GAACCTAG+TCCGCATA  
CCCTCTTCTATCTCCTGCTCCTCCAGTATTGCATCTTCTCTAGCTGCCATCTCGTCGCCGTTAAGTCT  
AACCGGCCGCTCGTACTTCTCCTTTACAGATATAATTTCTTATGATATTTTAACTTCTTTACCATT  
+  
FFFFFFFF:F:F:FFFFFFFF:FFFFFFFFFFFF:FFFFFF:FFFFFFFF:FFFFFFFFFFFFF:  
FFFFFFFF:FFFFFFFF:FFFFFFFFFFFF:FFFFFFFFFFFF:FFFFFFFFFFFFFFFFFFFFF:  
@A00155:342:HHGFNDSXY:1:2520:15700:35540 2:N:0:GAACCTAG+TCCGCATA  
CTTCTATCTCCTGCTCCTCCAGTATTGCATCTTCTCTAGCTGCCATCTCGTCGCCGTTAAGTCTAACC  
GGCCGCTCGTACTTCTCCTTTACAGATATAATTTCTTATGATATTTTAACTTCTTTACCATTCTGC  
+  
FFFFFFFFFFFFFFFFFFFFFFFFFFFFFFFFFFFF,FFFF:FFFFFFFFFFFFFFFFFFFF:FFFF  
FFFF:FFFFFFFFFFFF:FFFFFFFFFFFFFFFFFFFFFFFFFFFF:FFFFFFFFFFFFFFFFFFFFF  
@A00155:342:HHGFNDSXY:1:1407:19633:19586 2:N:0:GAACCTAG+TCCGCATA  
TTCTATCTCCTGCTCCTCCAGTATTGCATCTTCTCTAGCTGCCATCTCGTCGCCGTTAAGTCTAACCG  
GCCGCTCGTACTTCTCCTTTACAGATATAATTTCTTATGATATTTTAACTTCTTTACCATTCTGCA  
+  
FFFF:FFFF:FF,FF:FFFFF,F:FF,FFFFFFFFFFFF:FFFFF,FFF,FFFFFFFF:FFFF,  
F:FF:F,FF:F:FFFF:FFFFF,FFFFFF:FFFFFF:FFFFFF:FF:FFF:FFFFFFFFF  
@A00155:342:HHGFNDSXY:1:1563:4020:15843 1:N:0:GAACCTAG+TCCGCATA  
CTGCTCCTCCAGTATTGCATCTTCTCTAGCTGCCATCTCGTCGCCGTTAAGTCTAACCGGCCGCTCGT  
ACTTCTCCTTTACAGATATAATTTCTTATGATATTTTAACTTCTTTACCATTCTGCATGCTGTTCT  
+  
FFFFFFFFFFFFFFFFFFFFFFFFFFFF:F:FFFFFFFFFFFFFFFFFFFF:FFFFFFFF,FFFF:FFFF  
FF,FFFF:FFFFFFFF,F:FF:FF:FFFFF:,FFFFFF:FFF::F:FFFF,:F::,FFFF:  
@A00155:342:HHGFNDSXY:1:2555:18502:32252 1:N:0:GAACCTAG+TCCGCATA  
CTGCTCCTCCAGTATTGCATCTTCTCTAGCTGCCATCTCGTCGCCGTTAAGTCTAACCGGCCGCTCGT  
ACTTCTCCTTTACAGATATAATTTCTTATGATATTTTAACTTCTTTACCATTCTGCATGCTGTTCT  
+  
FFFFFFFFFFFFFFFFFFFFFFFFFFFF:FFFF::FF,FFFFFFFFFFFFFFFFFFFFFFFFFFFFF  
F:FFFFFFFFFFFFFFFFFFFF,FFFFFFFF:FFFF:FFFFFFFFFFFFFFFFFFFF:FFFFFFFFF  
@A00155:342:HHGFNDSXY:1:2203:23430:18396 1:N:0:GAACCTAG+TCCGCATA  
TGCTCCTCCAGTATTGCATCTTCTCTAGCTGCCATCTCGTCGCCGTTAAGTCTAACCGGCCGCTCGTA  
CTTCTCCTTTACAGATATAATTTCTTATGATATTTTAACTTCTTTACCATTCTGCATGCTGTTCTG  
+  
FFFFFFFFFFFFFFFFFFFFFFFFFFFFFFFFFFFFFFFFFFFFFFFFFFFFFFFFFFFFFFFFFFFFF  
,FFFFFFFFFFFF,FFFFFFFFFFFF,FF:FF:FFFFFFFFFFFFFFFF:FFFFFF:FFFFFF::FFFF  
@A00155:342:HHGFNDSXY:1:2520:32606:30248 2:N:0:GAACCTAG+TCCGCATA  
CCTCCAGTATTGCATCTTCTCTAGCTGCCATCTCGTCGCCGTTAAGTCTAACCGGCCGCTCGTACTTC  
TCCTTTACAGATATAATTTCTTATGATATTTTAACTTCTTTACCATTCTGCATGCTGTTCTGTTCC  
+  
FFFFFFFF:FFFFFFFFFFFFFFFFFFFFFFFFFFFFFFFFFFFF:FFFFFFFFFFFFFFFFFFFFF  
FFFFFFFFFFFFFFFFFFFFFFFFFFFFFFFFFFFFFFFFFFFF:FF,FFFFFFFFFFFF,FFFFFFFFF  
@A00155:342:HHGFNDSXY:1:2517:7979:9267 2:N:0:GAACCTAG+TCCGCATA  
TCCAGTATTGCATCTTCTCTAGCTGCCATCTCGTCGCCGTTAAGTCTAACCGGCCGCTCGTACTTCTC  
CTTTACAGATATAATTTCTTATGATATTTTAACTTCTTTACCATTCTGCATGCTGTTCTGTTCTCCTA  
+  
FFFFFFFFFFFF:FFFFF,FFFFFFFFFFFFFFFFFFFFFFFFFFFF:FFFFFFFFFFFFFFFFFFFFF  
F:FFFFFF:F:F:FF:FFFF,FF,FFFFFFFF:FFFFFF:FFFFFFFFFFFF,FF:FF:,  
@A00155:342:HHGFNDSXY:1:2204:8015:24236 1:N:0:GAACCTAG+TCCGCATA  
TATTGCATCTTCTCTAGCTGCCATCTCGTCGCCGTTAAGTCTAACCGGCCGCTCGTACTTCTCCTTTA  
CAGATATAATTTCTTATGATATTTTAACTTCTTTACCATTCTGCATGCTGTTCTGTTCTCCTACATAC  
+  
FFFFFFFFFFFFFFFFFFFFFFFFFFFFFFFFFFFFFFFFFFFFFFFFFFFFFFFFFFFF:FFFFFFFFFFFFF  
FFFFFFFFFFFFFFFFFFFF:FFFFFFFF:FF:,FFFFFFFF:FFFFFFFFFFFFFFFFFFFF:F

@A00155:342:HHGFNDSXY:1:2442:29839:8077 2:N:0:GAACCTAG+TCCGCATA  
TATTGCATCTTCTCTAGCTGCCATCTCGTCGCCGTAAAGTCTAACCGGCCGCTCGTACTTCTCCTTTA  
CAGATATAAATTCCTTATGATATTTAACTTCTTTACCATTCTGTCATGCTGTTCTGTTCTACATAC  
+  
FF:FFFFFFFFFFFFFFFFFFFFFFFFFFFFFFFFFFFFFFFFFFFFFFFFFFFFFFFFFFFFFFFFFFFFFFFFFFFFF:FFFFFF:FF  
FFFFFFFFFFFF::FFFFFFFFFFFFFFFFFFFFFFFFFFFFFFFFFFFFFFFFFFFFFFFFFFFFFFFFFFFFF,FFFFFF:FFF:FFFFF  
@A00155:342:HHGFNDSXY:1:2442:29839:8077 1:N:0:GAACCTAG+TCCGCATA  
TTGCATCTTCTCTAGCTGCCATCTCGTCGCCGTAAAGTCTAACCGGCCGCTCGTACTTCTCCTTTACA  
GATATAAATTCCTTATGATATTTAACTTCTTTACCATTCTGTCATGCTGTTCTG  
+  
FFFFFFFFFFFFFFFFFFFFFFFFFFFFFFFFFFFFFFFFFFFFFFFFFFFFFFFFFFFFFFFFFFFFFFFFFFFFFFFFF  
FFFFFFFF:FFFFFFFFFFFFFFFFFFFFFFFFFFFFFFFFFFFFFFFFFFFFFFFFFFFFFFFFFFFFFFFFFFFFF  
@A00155:342:HHGFNDSXY:1:2203:23701:17613 1:N:0:GAACCTAG+TCCGCATA  
TTGCATCTTCTCTAGCTGCCATCTCGTCGCCGTAAAGTCTAACCGGCCGCTCGTACTTCTCCTTTACA  
GATATAAATTCCTTATGATATTTAACTTCTTTACCATTCTGTCATGCTGTTCTG  
+  
FFFFFFFFFFFFFFFFFFFFFFFFFFFFFFFFFFFFFFFFFFFFFFFFFFFFFFFFFFFFFFFFFFFFFFFFFFFFFFFFF  
:FFFFFFFFFFFF:FFFFFFFFFFFFFFFFFFFFFFFFFFFFFFFFFFFFFFFFFFFFFFFFFFFFFFFFFFFFFFFFF  
@A00155:342:HHGFNDSXY:1:2539:9381:4586 1:N:0:GAACCTAG+TCCGCATA  
TTGCATCTTCTCTAGCTGCCATCTCGTCGCCGTAAAGTCTAACCGGCCGCTCGTACTTCTCCTTTACA  
GATATAAATTCCTTATGATATTTAACTTCTTTACCATTCTGTCATGCTGTTCTGTT  
+  
FFFFFFFFFFFFFFFFFFFFF:FFFFFFFFFFFFFFFFFFFFFFFFFFFFFFFFFFFFFFFFFFFFFFFFFFFFFFFFFFFFF  
FFFFFFFFFFFFFFFFFFFFFFFFFFFFFFFFFFFFFFFFFFFFFFFFFFFFFFFFFFFFFFFFFFFFFFFFFFFFFFFFF  
@A00155:342:HHGFNDSXY:1:2132:18502:1063 2:N:0:GAACCTAG+TCCGCATA  
TTGCATCTTCTCTAGCTGCCATCTCGTCGCCGTAAAGTCTAACCGGCCGCTCGTACTTCTCCTTTACA  
GATATAAATTCCTTATGATATTTAACTTCTTTACCATTCTGTCATGCTGTTCTGTTCTACATACTC  
+  
F:FFFFFF:FF:FFFFFFFFFFFFFFFFFFFFFFFFFFFFFFFFFFFFFFFFFFFFFFFFFFFFFFFFFFFFFFFFFFFFF  
FFFFFFFFFFFFFFFFFFFFFFFFFFFFFFFFFFFFFFFFFFFFFFFFFFFFFFFFFFFFFFFFFFFFFFFFFFFFFFFFF  
@A00155:342:HHGFNDSXY:1:2341:11776:18505 2:N:0:GAACCTAG+TCCGCATA  
TGCATCTTCTCTAGCTGCCATCTCGTCGCCGTAAAGTCTAACCGGCCGCTCGTACTTCTCCTTTACAG  
ATATAAATTCCTTATGATATTTAACTTCTTTACCATTCTGTCATGCTGTTCTGTTCTACATACTCG  
+  
FFFFFFFFFFFFFFFFFFFFFFFFFFFFFFFFFFFFFFFFFFFFFFFFFFFFFFFFFFFFFFFFFFFFFFFFFFFFFFFFF  
FFFFFFFFFFFFF:FFFFFFFFFFFFFFFFFFFFFFFFFFFFFFFFFFFFFFFFFFFFFFFFFFFFFFFFFFFFFFFFF,FFFFFFFFFFFFF  
@A00155:342:HHGFNDSXY:1:1524:29776:28823 2:N:0:GAACCTAG+TCCGCATA  
ATCTTCTCTAGCTGCCATCTCGTCGCCGTAAAGTCTAACCGGCCGCTCGTACTTCTCCTTTACAGATA  
TAATTCCTTATGATATTTAACTTCTTTACCATTCTGTCATGCTGTTCTGTTCTACATACTCGCTT  
+  
FFFFFFFFFFFFFFFFFFFFFFFFFFFFFFFFFFFFFFFFFFFFFFFFFFFFFFFFFFFFFFFFFFFFFFFFFFFFFFFFF  
FFFFFFFFFFFFFFFFFFFFFFFFFFFFFFFFFFFFFFFFFFFFFFFFFFFFFFFFFFFFFFFFFFFFFFFFFFFFFFFFF  
@A00155:342:HHGFNDSXY:1:2517:7979:9267 1:N:0:GAACCTAG+TCCGCATA  
ATCTTCTCTAGCTGCCATCTCGTCGCCGTAAAGTCTAACCGGCCGCTCGTACTTCTCCTTTACAGATA  
TAATTCCTTATGATATTTAACTTCTTTACCATTCTGTCATGCTGTTCTGTTCTACATACTCGCTT  
+  
FFFFFFFFFFFFFFFFFFFFFFFFFFFFFFFFFFFFFFFFFFFFFFFFFFFFFFFFFFFFFFFFFFFFFFFFFFFFFFFFF  
FFFF:FFFFFFFFFFFFF:FFFFFFFFFFFFFFFFFFFFFFFFFFFFFFFFFFFFFFFFFFFFFFFFFFFFFFFFFFFFF,FFFFFFFFFFFFF:  
@A00155:342:HHGFNDSXY:1:1645:9353:18912 1:N:0:GAACCTAG+TCCGCATA  
CTGCCATCTCGTCGCCGTAAAGTCTAACCGGCCGCTCGTACTTCTCCTTTACAGATATAAATTCCTTA  
TGATATTTAACTTCTTTACCATTCTGTCATGCTGTTCTGTTCTACATACTCGCTTATC  
+  
FFFFFFFFFFFFFFFFFFFFFFFFFFFFFFFFFFFFFFFFFFFFFFFFFFFFFFFFFFFFFFFFFFFFFFFFFFFFFFFFF  
FFFFFFFFFFFFF,FFFFFFFFFFFFF:FFFFFFFFFFFFF:FFFFFFFFFFFFF:FFFFFFFFFFFFF

$+$ 

@A00155:342:HHGFNDSXY:1:2208:31729:11537 1:N:0:GAACCTAG+TCCGCATA  
CTGCCATCTCGTCGCCGTTAAGTCTAACCGGCCGCTCGTACTTCTCCTTTACAGATATAATTTCTTA  
TGATATTTTAACTTCTTTACCATTTCTGCATGCTGTTCTGTTCTACATACTCGCTTATC

+

@A00155:342:HHGFNDSXY:1:2507:15646:1720 1:N:0:GAACCTAG+TCCGCATA  
CTGCCATCTCGTCGCCGTTAAGTCTAACCGGCCGCTCGTACTTCTCCTTTACAGATATAATTTCTTA  
TGATATTTTAACTTCTTTACCATTTCTGCATGCTGTTCTGTTCTACATACTCGCTTATC

+

@A00155:342:HHGFNDSXY:1:1627:9055:2832 1:N:0:GAACCTAG+TCCGCATA  
GCCATCTCGTCGCCGTTAAGTCTAACCGGCCGCTCGTACTTCTCCTTTACAGATATAATTTCCTTATG  
ATATTTTAACTTCTTTACCATTTCTGCATGCTGTTCTGTTCTACATACTCGCTTATCGGTACCCTGA

+

@A00155:342:HHGFNDSXY:1:2614:25346:34867 1:N:0:GAACCTAG+TCCGCATA  
GCCATCTCGTCGCCGTTAAGTCTAACCGGCCGCTCGTACTTCTCCTTTACAGATATAATTTCCCTTATG  
ATATTTTAACTTCTTTACCATTTCTGCATGCTGTTCTGTTCTACATACTCGCTTATCGGTACCCTGA

+

@A00155:342:HHGFNDSXY:1:1604:4047:4836 2:N:0:GAACCTAG+TCCGCATA  
GCCGTTAAGTCTAACCGCCGCTCGTACTTCTCCTTTACAGATATAATTTCTTATGATATTTAACT  
TCTTTACCATTTCTGCATGCTGTTCTGTTCTACATACTCGCTTATCGGTACCCTGACCATCTGCTTT

+

@A00155:342:HHGFNDSXY:1:2155:25400:22623 2:N:0:GAACCTAG+TCGCATA  
GCCGTTAAGTCTAACCGCCGCTCGTACTTCTCCTTTACAGATATAATTTCTTATGATATTTAACT  
TCTTTACCATTTCTGCATGCTGTTCTGTTCTACATACTCGCTTATCGGTACCTGACCATCTGCTTT

 $+$ 

@A00155:342:HHGFNDSXY:1:2203:23701:17613 2:N:0:GAACCTAG+TCCGCATA  
CCGTTAAGTCTAACCGGCCGCTCGTACTTCTCCTTTACAGATATAATTTCTTATGATATTTTAACTT  
CTTTACCATTTCTGCATGCTGTTCTGTTCTACATACTCGCTTATCGGTACCTTGACCATCTGCTTTC

 $+$ 

@A00155:342:HHGFNDSXY:1:2203:23430:18396 2:N:0:GAACCTAG+TCCGCATA  
CCGTTAAGTCTAACCGGCCGCTCGTACTTCTCCTTTACAGATATAATTTCTTATGATATTTTAACTT  
CTTACCATTCTGCATGCTGTTCTGTTCTACATACTCGCTTATCGGTACCTTGACCATCTGCTTTC

+

\_\_\_\_\_

@A00155:342:HHGFNDSXY:1:1674:14877:1110 2:N:0:GAACCTAG+TCCGCATA  
CGTTAAGTCTAACCGGCCGCTCGTACTTCTCCTTTACAGATATAATTTCTTATGATATTTTAACTTC  
TTTACAATTTCTGCATGCTGTTCTGTTCTACATACTCGCTTATCGGTACCCTGACCATCTGCTTTGA  
+  
FFFFFFFFFFFFFFFFFFFFFFFF,FF,F:FFFFFFFFFFFFFFFF,FFFFFFFFFFFFFFFF:FFFFFF  
FFFFFFFFFFFFFFFFFFFFFFFF:FFFFFFFF:FFFFFFFFFFFFFFFFFFFFFFFF:FFFFFFFFFFFFFF  
@A00155:342:HHGFNDSXY:1:2311:3115:1971 1:N:0:GAACCTAG+TCCGCATA  
CGTTAAGTCTAACCGGCCGCTCGTACTTCTCCTTTACAGATATAATTTCTTATGATATTTTAACTTC  
TTTACCATTCTGCATGCTGTTCTGTTCTACATACTCGCTTATCGGTACCCTGACCATCTGCTTTGA  
+  
FFFFFFFFFFFFFFFFFFFFFFFFFFFFFFFF,FFFFFFFF:FFFFFFFFFFFF,FFFFFF:,FFFFFFF  
FFFFFFF:FF::FFFF:FFFFFFFFFFFF,FFFFFFFFFFFFFFFF:FFFFFFFFFFFF:F:F,,,FFF  
@A00155:342:HHGFNDSXY:1:1366:17164:20917 1:N:0:GAACCTAG+TCCGCATA  
GTTAAGTCTAACCGGCCGCTCGTACTTCTCCTTTACAGATATAATTTCTTATGATATTTTAACTTCT  
TTACCATTCTGCATGCTGTTCTGTTCTACATACTCGCTTATCGGTACCCTGACCATCTGCTTTGAA  
+  
FFFFFFFFFFFFFFFFFFFFFFFFFFFFFFFFFFFFFFFFFFFFFFFFFFFFFFFF:FFFF,FFFFFFFFFFFFFFFF  
FFFFFFFFFFFFFFFFFFFFFFFFFFFFFFFFFFFFFFFFFFFFFFFFFFFFFFFFFFFFFFFFFFFFFFFFFFFF  
@A00155:342:HHGFNDSXY:1:1373:21269:28995 1:N:0:GAACCTAG+TCCGCATA  
GTTAAGTCTAACCGGCCGCTCGTACTTCTCCTTTACAGATATAATTTCTTATGATATTTTAACTTCT  
TTACCATTCTGCATGCTGTTCTGTTCTACATACTCGCTTATCGGTACCCTGACCATCTGCTTTGAA  
+  
FFFFFFFF:FFFFFFFFFFFF:FFFF:FFFFFFFFFFFFFFFF:FFFFFFFFFFFF:FFFFFFFFFFFF  
FFFFFFFFFFFFFFFFFFFFFFFFFFFFFFFFFFFFFFFFFFFFFFFFFFFFFFFFFFFFFFFFFFFFFFFFFFFF:F  
@A00155:342:HHGFNDSXY:1:2672:13693:10551 1:N:0:GAACCTAG+TCCGCATA  
TTAAGTCTAACCGGCCGCTCGTACTTCTCCTTTACAGATATAATTTCTTATGATATTTTAACTTCTT  
TACCATTCTGCATGCTGTTCTGTTCTACATACTCGCTTATCGGTACCCTGACCATCTGCTTTGAAG  
+  
FFFFFFFFFFFFFFFFFFFFFFFFFFFFFFFFFFFFFFFFFFFFFFFFFFFFFFFFFFFFFFFFFFFFFFFFFFFF  
FFFFFFFFFFFFFFFFFFFFFFFFFFFFFFFFFFFFFFFFFFFFFFFFFFFFFFFFFFFFFFFFFFFFFFFFFFFF  
@A00155:342:HHGFNDSXY:1:2539:9381:4586 2:N:0:GAACCTAG+TCCGCATA  
TAAGTCTAACCGGCCGCTCGTACTTCTCCTTTACAGATATAATTTCTTATGATATTTTAACTTCTTT  
ACCATTCTGCATGCTGTTCTGTTCTACATACTCGCTTATCGGTACCCTGACCATCTGCTTTGAAGT  
+  
FFFF:FFFFFFFFFFFFFFFFFFFFFFFFFFFFFFFFFFFFFFFFFFFFFFFFFFFFFFFFFFFFFFFFFFFF  
FFFFFFFFFFFFFFFFFFFF:F,FFFFFFFFFFFFFFFFFFFFFFFF:FFFFFF,FFFFFFFFFFFFFFFFFFFF  
@A00155:342:HHGFNDSXY:1:1413:18945:7404 1:N:0:GAACCTAG+TCCGCATA  
TAAGTCTAACCGGCCGCTCGTACTTCTCCTTTACAGATATAATTTCTTATGATATTTTAACTTCTTT  
ACCATTCTGCATGCTGTTCTGTTCTACATACTCGCTTATCGGTAACTGACCATCTGCTTTGAAGT  
+  
FFFFFFFFF,F:::,FF,:FFF,,,F,:,F,F:::FFFF:FFF::,F,,F,FF,F,FF,,:F,:F  
FFF:FFF,:,:,F,,,::,,FFFF::F,:FFF:F,:FFF:FF,F,FFF,F:F,:F:FF:F,:FFFFFFFF  
@A00155:342:HHGFNDSXY:1:2127:1461:25034 2:N:0:GAACCTAG+TCCGCATA  
ACCGGCCGCTCGTACTTCTCCTTTACAGATATAATTTCTTATGATATTTTAACTTCTTTACCATTTC  
TGCATGCTGTTCTGTTCTACATACTCGCTTATCGGTACCCTGACCATCTGCTTTGAAGTGGACGTTA  
+  
FFF:,F::FF,:FFFFFF:F,:FFFF,FFFFFFFF:,FFFFFFFF:FFFFFFFF:FFFFFFFFFFFF  
:,FFFFFFFFFFFFFFFFFFFFFFFFFFFFFFFFFFFFFFFFFFFFFFFFFFFFFFFFFFFFFFFFFFFF  
@A00155:342:HHGFNDSXY:1:1366:17164:20917 2:N:0:GAACCTAG+TCCGCATA  
ACCGGCCGCTCGTACTTCTCCTTTACAGATATAATTTCTTATGATATTTTAACTTCTTTACCATTTC  
TGCATGCTGTTCTGTTCTACATACTCGCTTATCGGTACCCTGACCATCTGCTTTGAAGTGGACGTTA  
+  
:FFFFFFFFFFFFFFFFFFFF::FFFFFFFFFFFFFFFF:FFFFFFFFFFFFFFFF,FFFFFFFFFFFF  
FFFF,FF,F,FFFF:FFF,:FFFFFFFFFFFFFFFFFFFFFFFFFFFFFFFFFFFFFFFFFFFFFFFFFFFF

@A00155:342:HHGFNDSXY:1:1106:22571:19664 2:N:0:GAACCTAG+TCCGCATA  
GCCGCTCGTACTTCTCCTTTACAGATATAATTTTCCTTATGATATTTTAACTTCTTTACCATTTCTGCA  
TGCTGTTCTGTTCTACATACTCGCTTATCGGTACCCTGACCATCTGCTTTGAAGTGGACGTTATTTC  
+  
FFFFFFFFFFFFFFFFFFFFFFFFFFFFFFFF:F,F:FFFFFF:FFFFFFFFFFFFFFFF:FFFFFFFFFFFFFFFF  
FFF:FFFFFF,FFFFFFFFFFFFFFFFFFFFFFFFFFFFFFFF:F,FFFFFF,FFFFFFFFFFFFFFFFFFFF  
@A00155:342:HHGFNDSXY:1:1645:9353:18912 2:N:0:GAACCTAG+TCCGCATA  
CCGCTCGTACTTCTCCTTTACAGATATAATTTTCCTTATGATATTTTAACTTCTTTACCATTTCTGCAT  
GCTGTTCTGTTCTACATACTCGCTTATCGGTACCCTGACCATCTGCTTTGAAGTGGACGTTATTTCG  
+  
FFFFFFFFFFFFFF:FFFFFFFF:FFFFFFFFFFFFFFFFFFFFFFFFFFFFFFFF:FFF:FFFFFFFFFFFFFF  
FF:FFFFFFFFFFFFFFFFFFFFFFFFFFFFFFFFFFFFFFFFFFFFFFFFFFFFFFFFFFFFFFFFFFFFFFFF  
@A00155:342:HHGFNDSXY:1:1122:16857:7169 1:N:0:GAACCTAG+TCCGCATA  
TCCTTTACAGATATAATTTTCCTTATGATATTTTAACTTCTTTACCATTTCTGCATGCTGTTCTGTTCC  
TACATACTCGCTTATCGGTACCCTGACCATCTGCTTTGAAGTGGACGTTATTTCGACCACTTCAGTGT  
+  
FFFFFFFFFFFFFFFF:FFFFF:FF:FFFF:FFFFFFFFFFFFFFFFFFFFFFFFFFFFFFFF:FFF:FFFFFFFF  
FFFFFFFFFFFFFF,FFFFFFFFFFFFFFFFFFFFFFFFFFFFFFFF:FFFFFFFFF,FFFFFFFFF,FFFF:F:FFF  
@A00155:342:HHGFNDSXY:1:1106:22571:19664 1:N:0:GAACCTAG+TCCGCATA  
CCTTTACAGATATAATTTTCCTTATGATATTTTAACTTCTTTACCATTTCTGCATGCTGTTCTGTTCTCCT  
ACATACTCGCTTATCGGTACCCTGACCATCTGCTTTGAAGTGGACGTTATTTCGACCACTTCAGTGTC  
+  
FFFFFFFF:FFFFFFFFFFFF:,FFFFFFFFFFFFFFFFFFFFFFFFFFFFFFFFFFFFFFFF,FFFFFFFFFFFFFF  
FFFFFFFFFFFFFFFFFFFFFFFFFFFFFFFF:FFFFFFFFFFFF,FFFFFFFFFFFFFFFFFFFFFFFFFFFFFFF  
@A00155:342:HHGFNDSXY:1:2205:25509:9283 1:N:0:GAACCTAG+TCCGCATA  
TTTACAGATATAATTTTCCTTATGATATTTTAACTTCTTTACCATTTCTGCATGCTGTTCTGTTCTCCTAC  
ATACTCGCTTATCGGTACCCTGACCATCTGCTTTGAAGTGGACGTTATTTCGACCACTTCAGTGTCGT  
+  
FFFF:FFFFFFFFFFFFFFFFFFFFFFFFFFFFFFFFFFFFFFFF:FFFFFFFFFFFFFF:FFFFFFFFFFFFFF  
FFFFFF:FFFFFF:FFFFFF:FFFFFFF:FFFFFFFFFFFFFFFFFFFFFFFFFFFFFFFF:FFFFFF:FFFFF  
@A00155:342:HHGFNDSXY:1:2208:31729:11537 2:N:0:GAACCTAG+TCCGCATA  
TACAGATATAATTTTCCTTATGATATTTTAACTTCTTTACCATTTCTGCATGCTGTTCTGTTCTCCTACAT  
ACTCGCTTATCGGTACCCTGACCATCTGCTTTGAAGTGGACGTTATTTCGACCACTTCAGTGTCGTA  
+  
:FFFFFFFFFFFFFFFFFFFFFFFFFFFFFFFFFFFFFFFF:FFFFFFFFFFFFFFFFFFFFFFFFFFFFFFFF  
FFFFFFFFFFFF:FFFFFFFFFFFFFFFFFFFFFFFFF,FFFFFFFFFFFFFF:FFFF:FFFFFFFFFFFFFFF  
@A00155:342:HHGFNDSXY:1:1455:5285:7764 1:N:0:GAACCTAG+TCCGCATA  
TACAGATATAATTTTCCTTATGATATTTTAACTTCTTTACCATTTCTGCATGCTGTTCTGTTCTCCTACAT  
ACTCGCTTATCGGTACCCTGACCATCTGCTTTGAAGTGGACGTTATTTCGACCACTTCAGTGTCGTAA  
+  
FFFFFFFFFFFFFFFFFFFFFFFFFFFFFFFFFFFFFFFF:FFFF:FFFFFFFFFFFFFFFFFFFFFFFF:FFFF:  
FFFFFFFFFFFFFF:FFFFFFFFFFFFFFFFFFFFFFFFFFFFFFFFFFFFFFFFFFFFFFFFFFFFFFFFFFFF  
@A00155:342:HHGFNDSXY:1:1342:14416:13933 1:N:0:GAACCTAG+TCCGCATA  
TACAGATATAATTTTCCTTATGATATTTTAACTTCTTTACCATTTCTGCATGCTGTTCTGTTCTCCTACAT  
ACTCGCTTATCGGTACCCTGACCATCTGCTTTGAAGTGGACGTTATTTCGACCACTTCAGTGTCGTAA  
+  
:FFFFFFFFFFFFFFFFFFFFFFFFFFFFFFFFFFFFFFFF:FFFFFFFFFFFFFFFFFFFFFFFFFFFFFFFF  
FFFFFFFFFFFFFFFFFFFFFFFFFFFFFFFFFFFFFFFFFFFFFFFFFFFFFFFFFFFFFFFFFFFFFFFFFFFF  
@A00155:342:HHGFNDSXY:1:1413:18945:7404 2:N:0:GAACCTAG+TCCGCATA  
TACAGATATAATTTTCCTTATTATATTTTAACTTCTTTACCATTTCTGCATGCTGTTCTGTTCTCCTACAT  
ACTCGCTTATCGGTACCCTGACCATCTGCTTTGAAGTGGACGTTATTTCGACCACTTCAGTGTCGTAA  
+  
::,F,FFFFFFFFF:F,:F,:FFFFFFFF,FF,,FF:,:::FFFF,,FF,FFF:FFFF:FFF:F,,F  
FFF,F,FF,FF,:F,F::FF,FFFF:F,:,FFF,FFF,:FFFF::FFFF,,,,,FFFFFFFF:,::,F

@A00155:342:HHGFNDSXY:1:2133:8431:31062 2:N:0:GAACCTAG+TCCGCATA  
ATATAATTTTCCTTATGATATTTTAACTTCTTTACCATTTCTGCATGCTGGTCTGTTCTACATACTCG  
CTTATCGGTACCCTGACCATCTGCTTTGAAGTGGACGTTATTTGACCACTTCAGTGTGTAACCTAC  
+  
FFFFF:FFFFFFFFFFFFFFFFFFFFFFFFF:F:FFFF:FFFFFFFFFFF,F,FFFFFFFF:FFFF:FFFFF  
FFFFFFFF:FF:FFFFF,F:F:F,FFFFFFFFFFFFFFFFFFFFFFFFFFFFFFFFFFFFFFFFFFFFFFFFF  
@A00155:342:HHGFNDSXY:1:2519:3893:34194 2:N:0:GAACCTAG+TCCGCATA  
ATAATTTTCCTTATGATATTTTAACTTCTTTACCATTTCTGCATGCTGTTCTGTTCTACATACTCGCT  
TATCGGTACCCTGACCATCTGCTTTGAAGTGGACGTTATTTGACCACTTCAGTGTGTAACCTAC  
+  
:FFFFFFFF,FFFFFFFFFFFFFFFFFFFFFFFFFFFFFFFFFFFFFFFFFFFFFFFF:FFFFFFFF,FFF  
FFFF:F:FFFF:FF:FFFFFFFFFFFFFFFF:FFFFFFFF:FFF:FFFFFFFF:FFFFFFFFFFFFFFFF  
@A00155:342:HHGFNDSXY:1:1154:24451:18818 2:N:0:GAACCTAG+TCCGCATA  
ATAATTTTCCTTATGATATTTTAACTTCTTTACCATTTCTGCATGCTGTTCTGTTCTACATACTCGCT  
TATCGGTACCCTGACCATCTGCTTTGAAGTGGACGTTATTTGACCACTTCAGTGTGTAACCTAC  
+  
FFFFFFFFFFFFFFFFFFFFFFFFFFFFFFFF:FFFFFFFFFFFFFFFF:FF:FFFFFF,FFFFFFFF:FFFFF  
FFFFFFFFF:,FFFFFFFFFFFFFFFFFFFFFFFFFFFFFFFFFFFFFFFF:FFFFFFFFFFFFFFFF  
@A00155:342:HHGFNDSXY:1:1455:5285:7764 2:N:0:GAACCTAG+TCCGCATA  
TTATGATATTTTAACTTCTTTACCATTTCTGCATGCTGTTCTGTTCTACATACTCGCTTATCGGTAC  
CCTGACCATCTGCTTTGAAGTGGACGTTATTTGACCACTTCAGTGTGTAACC  
+  
FFFFFFFFF:FFFFFFFFFFFFFFFFFFFFFFFFFFFFFFFFFFFFFFFFFFFFFFFFFFFFFFFFFFFFFFFF  
FFFFFFFFFFFFFFFFFFFFFFFFFFFFFFFF:FFFFFFFFFFFFFFFFFFFFFFFFFFFFFFFF  
@A00155:342:HHGFNDSXY:1:1342:14416:13933 2:N:0:GAACCTAG+TCCGCATA  
TTATGATATTTTAACTTCTTTACCATTTCTGCATGCTGTTCTGTTCTACATACTCGCTTATCGGTAC  
CCTGACCATCTGCTTTGAAGTGGACGTTATTTGACCACTTCAGTGTGTAACC  
+  
FFFFFFFFFFFFFFFFFFFFFFFFFFFFFFFFFFFFFFFFFFFFFFFFFFFFFFFFFFFFFFFF:FFFFF  
FFFFFFFFFFFFFFFFFFFFFFFF:FFFFFFFFFFFFFFFFFFFFFFFF:FFFFFFFFFFFFFFFF  
@A00155:342:HHGFNDSXY:1:2204:8015:24236 2:N:0:GAACCTAG+TCCGCATA  
TTATGATATTTTAACTTCTTTACCATTTCTGCATGCTGTTCTGTTCTACATACTCGCTTATCGGTAC  
CCTGACCATCTGCTTTGAAGTGGACGTTATTTGACCACTTCAGTGTGTAACCTACTAGTTCTACGG  
+  
FFFFF:FFFFFFFFFFFFFFFFFFFFFFFFFFFFFFFF,FFFFFFFFFFFFFF:FFFFFFFFFFFFFFFF  
FFFFFFFFFFFF,FFFFFFFFFFFFFFFFFFFFFFFFFFFFFFFFFFFFFFFFFFFFFFFFFFFFFFFF  
@A00155:342:HHGFNDSXY:1:1266:22272:1642 2:N:0:GAACCTAG+TCCGCATA  
TTATGATATTTTAACTTCTTTACCATTTCTGCATGCTGTTCTGTTCTACATACTCGCTTATCGGTAC  
CCTGACCATCTGCTTTGAAGTGGACGTTATTTGACCACTTCAGTGTGTAACCTACTAGTTCTACGG  
+  
FFFFFFFF:FFFFFFFFFFFFFFFFFFFFFFFF,FFFFFFF:FFFFF:F:FFFFFFFF:FFFFFFFFFFFFFFFF  
FFFFFFFFFFFFFFFFFFFFFFFFFFFFFFFFFFFFFFFFFFFFFFFFFFFFFFFFFFFFFFFF:FFFFFFFFF,FFFFF  
@A00155:342:HHGFNDSXY:1:2555:18502:32252 2:N:0:GAACCTAG+TCCGCATA  
GATATTTTAACTTCTTTACCATTTCTGCATGCTGTTCTGTTCTACATACTCGCTTATCGGTACCCTG  
ACCATCTGCTTTGAAGTGGACGTTATTTGACCACTTCAGTGTGTAACCTACTAGTTCTACGGTGT  
+  
FFFFFFFFFFFFFFFFFFFFFFFFFFFFFFFF:FFFFFFFFF,FFFFFF,FFF:FFFF:FFFFFFFFFFFFFFFF  
FFFFFFFFFFFFFFFFFFFFFFFFFFFFFFFFFFFFFFFFFFFFFFFFFFFFFFFFFFFFFFFFFFFFFFFF  
@A00155:342:HHGFNDSXY:1:1563:4020:15843 2:N:0:GAACCTAG+TCCGCATA  
GATATTTTAACTTCTTTACCATTTCTGCATGCTGTTCTGTTCTACATACTAGCTTATCGGTACCCTG  
ACCATCTGCTTTGAAGTGGACGTTATTTGACCACTTCAGTGTGTAACCTACTAGTTCTACGGTGT  
+  
FFFFFFFFFFFFFFFFF,:FFF:FFFF,FF:FF:FF:FF,FFFFFFFFFFFFFFFF,FFFFFFFF:,FFFF,FF  
FF,FFFF:FFFFFFFFF:FFFFFFFFFFFFFFFF:FFFFF:FFFF:,F,FFFFFF,FFFFFFFF:,FFFF

[illegible]

@A00155:342:HHGFNDSXY:1:2666:16233:26005 2:N:0:GAACCTAG+TCCGCATA  
ATGCGGTTCTGTTCCTACATACTCGCTTATCGGTACCCTGACCATCTGCTTTGAAGTGGACGTTATTT  
CGACCACTTCAGTGTCGTAACCTACTAGTTCTACGGTGTTGTCATTATCATCGTAATTATCTTGAAGTCG  
+  
FF,F,: ,FFFFFFFFF:FFFFFFFFFFFFFFFFFFFFFFFFFFFFFFFFFFFF,FFFFFFFFFFFFFFFFFFFFFFFFFFFFFFFFFFFF,FFFFFFF  
F:FFFFFFFFFFFFFFFFFFFF,FFF:F,FFFFFF,FFF:FF:FFFFFF,FFFFFFF,F:F:FFF:FFFFFFFF  
@A00155:342:HHGFNDSXY:1:1642:1588:7686 1:N:0:GAACCTAG+TCCGCATA  
ATGCTGTTCTGTTCCTACATACTCGCTTATCGGTACCCTGACCATCTGCTTTGAAGTGGACGTTATTT  
CGACCACTTCAGTGTCGTAACCTACTAGTTCTACGGTGTTGTCATTATCATCGTAATTATCTTGAAGTCG  
+  
FFFFFFFFFFFFFFFFFFFFFFFFFFFFFFFFFFFFFFFFFFFFFFFFFFFFFFFFFFFFFFFFFFFFFFFFFFFFFFFFFFFFFFFFFFFFFFFFFFFFFFFFFFFF  
FFFFFFFFFFFFFFFFFFFFFFFFFFFFFFFFFFFFFFFFFFFFFFFFFFFFFFFFFFFFFFFFFFFFFFFFFFFFFFFFFFFFFFFFFFFFFFFFFFFFFFFFFFFF:FFF:F  
@A00155:342:HHGFNDSXY:1:1642:1886:11428 1:N:0:GAACCTAG+TCCGCATA  
ATGCTGTTCTGTTCCTACATACTCGCTTATCGGTACCCTGACCATCTGCTTTGAAGTGGACGTTATTT  
CGACCACTTCAGTGTCGTAACCTACTAGTTCTACGGTGTTGTCATTATCATCGTAATTATCTTGAAGTCG  
+  
FFFFFFFFFFFFFFFFFFFFFFFFFFFFFFFFFFFFFFFFFFFFFFFFFFFFFFFFFFFFFFFFFFFFFFFFFFFFFFFFFFFFFFFFFFFFFFFFFFFFFFFFFFFF  
FFFFFFFFFFFFFFFFFFFFFFFFFFFFFFFFFFFFFFFFFFFFFFFFFFFFFFFFFFFFFFFFFFFFFFFFFFFFFFFFFFFFFFFFFFFFFFFFFFFFFFFFFFFF:FFF:F  
@A00155:342:HHGFNDSXY:1:1622:21034:32127 1:N:0:GAACCTAG+TCCGCATA  
ATGCTGTTCTGTTCCTACATACTCGCTTATCGGTACCCTGACCATCTGCTTTGAAGTGGACGTTATTT  
CGACCACTTCAGTGTCGTAACCTACTAGTTCTACGGTGTTGTCATTATCATCGTAATTATCTTGAAGTCG  
+  
FFFFFFFFFFFFFFFFFFFFFFFFFFFFFFFFFFFFFFFFFFFFFFFFFFFFFFFFFFFFFFFFFFFFFFFFFFFFFFFFFFFFFFFFFFFFFFFFFFFFFFFFFFFF  
FFFFFFFFFFFFFFFFFFFFFFFFFFFFFFFFFFFFFFFFFFFFFFFFFFFFFFFFFFFFFFFFFFFFFFFFFFFFFFFFFFFFFFFFFFFFFFFFFFFFFFFFFFFF:F  
@A00155:342:HHGFNDSXY:1:2512:5719:32722 2:N:0:GAACCTAG+TCCGCATA  
TGCTGTTCTGTTCCTACATACTCGCTTATCGGTACCCTGACCATCTGCTTTGAAGTGGACGTTATTT  
GACCACTTCAGTGTCGTAACCTACTAGTTCTACGGTGTTGTCATTATCATCGTAATTATCTTGAAGTCG  
+  
FFFFFFFFFFFF:FFFFFFFFFFFF,FFFFFFFF:FFFFFFFFFFFF:F:,FFFFFFFFFFFFFFFFFFFFFFFFFFFF  
FF:FFFFFFFFFFFF:FF,FFFF:FFFFFFFFFFFFFFFFFFFFFFFFFFFFFFFFFFFFFFFFFFFFFFFFFFFFFFFFFFFF:F  
@A00155:342:HHGFNDSXY:1:1363:8467:16877 1:N:0:GAACCTAG+TCCGCATA  
TGTTCTGTTCCTACATACTCGCTTATCGGTACCCTGACCATCTGCTTTGAAGTGGACGTTATTTTCGAC  
CACTTCAGTGTCGTAACCTACTAGTTCTACGGTGTTGTCATTATCATCGTAATTATCTTGAAGTCG  
+  
FFFFFFFFFFFFFFFFFFFFFFFFFFFFFFFFFFFFFFFFFFFFFFFFFFFFFFFFFFFFFFFFFFFFFFFFFFFFFFFFFFFFFFFFFFFFFFFFFFFFFFFFFFFF  
FFFFFFFFFFFFFFFFFFFFFFFFFFFFFFFFFFFFFFFFFFFFFFFFFFFFFFFFFFFFFFFFFFFFFFFFFFFFFFFFFFFFFFFFFFFFFFFFFFFFFFFFFFFF:F,F:FFFF  
@A00155:342:HHGFNDSXY:1:1332:18213:13526 1:N:0:GAACCTAG+TCCGCATA  
TGTTCTGTTCCTACATACTCGCTTATCGGTACCCTGACCATCTGCTTTGAAGTGGACGTTATTTTCGAC  
CACTTCAGTGTCGTAACCTACTAGTTCTACGGTGTTGTCATTATCATCGTAATTATCTTGAAGTCG  
+  
FFFFFFFFFFFFFFFFFFFFFFFFFFFFFFFFFFFFFFFFFFFFFFFFFFFFFFFFFFFFFFFFFFFFFFFFFFFFFFFFFFFFFFFFFFFFFFFFFFFFFFFFFFFF  
FFFFFFFFFFFFFFFFFFFFFFFFFFFFFFFFFFFFFFFFFFFFFFFFFFFFFFFFFFFFFFFFFFFFFFFFFFFFFFFFFFFFFFFFFFFFFFFFFFFFFFFFFFFF:FFF:FFFF  
@A00155:342:HHGFNDSXY:1:1332:17598:13369 1:N:0:GAACCTAG+TCCGCATA  
TGTTCTGTTCCTACATACTCGCTTATCGGTACCCTGACCATCTGCTTTGAAGTGGACGTTATTTTCGAC  
CACTTCAGTGTCGTAACCTACTAGTTCTACGGTGTTGTCATTATCATCGTAATTATCTTGAAGTCG  
+  
FFFFFFFFFFFFFFFFFFFFFFFFFFFFFFFFFFFFFFFFFFFFFFFFFFFFFFFFFFFFFFFFFFFFFFFFFFFFFFFFFFFFFFFFFFFFFFFFFFFFFFFFFFFF  
FFFFFFFFFFFF:FFF:FFFF:FFFFFFFFFFFFFFFFFFFFFFFFFFFFFFFFFFFF:FFFFFFFFFFFFFFFFFFFFFFFFFFFFFFFFFFFF  
@A00155:342:HHGFNDSXY:1:1654:6659:19946 1:N:0:GAACCTAG+TCCGCATA  
TGTTCTGTTCCTACATACTCGCTTATCGGTACCCTGACCATCTGCTTTGAAGTGGACGTTATTTTCGAC  
CACTTCAGTGTCGTAACCTACTAGTTCTACGGTGTTGTCATTATCATCGTAATTATCTTGAAGTCG



@A00155:342:HHGFNDSXY:1:1430:18982:20619 2:N:0:GAACCTAG+TCCGCATA  
GTTCTGTTCTACATACTCGCTTATCGGTACCCTGACCATCTGCTTTGAAGTGGACGTTATTTTCGACC  
ACTTCAGTGTTCGTAACCTACTAGTTCTACGGTGTGTCATTCATCGTAATTATCTTGAAGTCG

+

FFFFFFFFFFFFFFFFFFFFFFFFFFFFFFFFFFFFFFFFFFFFFFFFFFFFFFFFFFFFFFFFFFFFFFFFFFFFFFFF  
FFFFFFFFFFFFFFFFFFFFFFFFFFFFFFFFFFFFFFFFFFFFFFFFFFFFFFFFFFFFFFFFFFFFFFFFFFFFFFFF:FFF

@A00155:342:HHGFNDSXY:1:2108:17056:24549 2:N:0:GAACCTAG+TCCGCATA  
GTTCTGTTCTACATACTCGCTTATCGGTACCCTGACCATCTGCTTTGAAGTGGACGTTATTTTCGACC  
ACTTCAGTGTTCGTAACCTACTAGTTCTACGGTGTGTCATTCATCGTAATTATCTTGAAGTCGTGTG

+

FFFFFFFFFFFFFFFFFFFFFFFFFFFFFFFFFFFFFFFFFFFFFFFFFFFFFFFFFFFFFFFFFFFFFFFFFFFFFFFF  
FFFFFFFFFFFFFFFFFFFFFFFFFFFFFFFFFFFFFFFFFFFFFFFFFFFFFFFFFFFFFFFFFFFFFFFFFFFFFFFF

@A00155:342:HHGFNDSXY:1:2132:18502:1063 1:N:0:GAACCTAG+TCCGCATA  
GTTCTGTTCTACATACTCGCTTATCGGTACCCTGACCATCTGCTTTGAAGTGGACGTTATTTTCGACC  
ACTTCAGTGTTCGTAACCTACTAGTTCTACGGTGTGTCATTCATCGTAATTATCTTGAAGTCGTGTGG

+

F:FFFF,FFFFFFFFFFFFFFFFFFFFFFFFFFFFFFFFFFFFFFFFFFFFFFFFFFFFFFFFFFFFFFFFFFFFFFFF  
FFFFFFFFFFFFFFFFFFFFFFFFFFFFFFFFFFFFFFFFFFFFFFFFFFFFFFFFFFFFFFFFFFFFFFFFFFFFFFFF

@A00155:342:HHGFNDSXY:1:2250:24207:28479 2:N:0:GAACCTAG+TCCGCATA  
TTCTGTTCTACATACTCGCTTATCGGTACCCTGACCATCTGCTTTGAAGTGGACGTTATTTTCGACCA  
CTTCAGTGTTCGTAACCTACTAGTTCTACGGTGTGTCATTCATCGTAATTATCTTGAAGTCGTGTGGG

+

FFFFFFFFFFFFFFFFFFFFFFFFFFFFFFFFFFFFFFFFFFFFFFFFFFFFFFFFFFFFFFFFFFFFFFFFFFFFFFFF  
FFFFFFFFFFFFFFFFFFFFFFFFFFFFFFFFFFFFFFFFFFFFFFFFFFFFFFFFFFFFFFFFFFFFFFFFFFFFFFFF

@A00155:342:HHGFNDSXY:1:1240:14027:3771 1:N:0:GAACCTAG+TCCGCATA  
TTCTGTTCTACATACTCGCTTATCGGTACCCTGACCATCTGCTTTGAAGTGGACGTTATTTTCGACCA  
CTTCAGTGTTCGTAACCTACTAGTTCTACGGTGTGTCATTCATCGTAATTATCTTGAAGTCGTGTGGG

+

FFFFFFFFFFFFFFFFFFFFFFFFFFFFFFFFFFFFFFFFFFFFFFFFFFFFFFFFFFFFFFFFFFFFFFFFFFFFFFFF  
FFFFFFFFFFFFFFFFFFFFFFFFFFFFFFFFFFFFFFFFFFFFFFFFFFFFFFFFFFFFFFFFFFFFFFFFFFFFFFFF:FFFFFFFF

@A00155:342:HHGFNDSXY:1:2538:9652:13260 1:N:0:GAACCTAG+TCCGCATA  
TTCTGTTCTACATACTCGCTTATCGGTACCCTGACCATCTGCTTTGAAGTGGACGTTATTTTCGACCA  
CTTCAGTGTTCGTAACCTACTAGTTCTACGGTGTGTCATTCATCGTAATTATCTTGAAGTCGTGTGGG

+

FFFFFFFFFFFFFFFFFFFFFFFFFFFFFFFFFFFFFFFFFFFFFFFFFFFFFFFFFFFFFFFFFFFFFFFFFFFFFFFF  
FFFFFFFFFFFFFFFFFFFFFFFFFFFFFFFFFFFFFFFFFFFFFFFFFFFFFFFFFFFFFFFFFFFFFFFFFFFFFFFF

@A00155:342:HHGFNDSXY:1:2250:24207:28479 1:N:0:GAACCTAG+TCCGCATA  
TCTGTTCTACATACTCGCTTATCGGTACCCTGACCATCTGCTTTGAAGTGGACGTTATTTTCGACCAC  
TTCAGTGTTCGTAACCTACTAGTTCTACGGTGTGTCATTCATCGTAATTATCTTGAAGTCGTGTGGG

+

FFFFFFFFFFFFFFFFFFFFFFFFFFFFFFFFFFFFFFFFFFFFFFFFFFFFFFFFFFFFFFFFFFFFFFFFFFFFFFFF  
FFFFFFFFFFFFFFFFFFFFFFFFFFFFFFFFFFFFFFFFFFFFFFFFFFFFFFFFFFFFFFFFFFFFFFFFFFFFFFFF

@A00155:342:HHGFNDSXY:1:2229:3622:11678 2:N:0:GAACCTAG+TCCGCATA  
TTCCTACATACTCGCTTATCGGTACCCTGACCATCTGCTTTGAAGTGGACGTTATTTTCGACCACTTCA  
GTGTCGTAACCTACTAGTTCTACGGTGTGTCATTCATCGTAATTATCTTGAAGTCGTGTGGGTCGTC

+

FFFFFFFFFFFFFFFFFFFFFFFFFFFFFFFFFFFFFFFFFFFFFFFFFFFFFFFFFFFFFFFFFFFFFFFFFFFFFFFF  
FFFFFFFFFFFFFFFFFFFFFFFFFFFFFFFFFFFFFFFFFFFFFFFFFFFFFFFFFFFFFFFFFFFFFFFFFFFFFFFF

@A00155:342:HHGFNDSXY:1:1566:15935:14465 2:N:0:GAACCTAG+TCCGCATA  
TTCCTACATACTCGCTTATCGGTACCCTGACCATCTGCTTTGAAGTGGACGTTATTTTCGACCACTTCA  
GTGTCGTAACCTACTAGTTCTACGGTGTGTCATTCATCGTAATTATCTTGAAGTCGTGTGGGTCGTC

+

:FFFFFFFFFFFFFFFFFFFFFFFFFFFFFFFFFFFFFFFFFFFFFFFFFFFFFFFFFFFFFFFFFFFFFFFFFFFFFFFF  
FFFFFFFFFFFFFFFF,F:,FFFFF,FFFFF:FFFFFFFFFFFFFFFFFFFFFFFFFFFFFFFFFFFFFFFFFFFFFFFF



[illegible]

[illegible]

@A00155:342:HHGFNDSXY:1:2108:30391:28322 2:N:0:GAACCTAG+TCCGCATA  
 TTATCGGTACCCTGACCATCTGCTTTGAAGTGGACGTTATTTGACCACTTCAGTGTGCTAACCTACT  
 AGTTCTACGGTGTGTCATTCATCGTAATTATCTTGAAGTCGTGTGGGTCGTCGAACCTCACACCGCC  
 +  
 FFFFFFFFFFFFFFFFFFFFFFFFFF:FFFFFFFFFFFFFFFF:FFFFFFF,FFFFFFFFFFFFFFFF  
 :.FFFFFFFFFFFFFFFFFFFFFFFFFFFFFFFFFFFFFFFFFFFFFFFFFFFFFFFFFFFFFFFF  
 @A00155:342:HHGFNDSXY:1:2178:17779:24298 2:N:0:GAACCTAG+TCCGCATA  
 TTATCGGTACCCTGACCATCTGCTTTGAAGTGGACGTTATTTGACCACTTCAGTGTGCTAACCTACT  
 AGTTCTACGGTGTGTCATTCATCGTAATTATCTTGAAGTCGTGTGGGTCGTCGAACCTCACACCGCC  
 +  
 FFFFFFFFFFFFFFFFFFFFFFFFFF:FFFFFFFFFFFFFFFF:FFFFFFFF,FFFFFFFFFFFFFFFF  
 FFFFFFFFFFFFFFFFFFFFFFFFFF:FFFFFFFFFFFFFFFF:FFFFFFFF,FFFFFFFFFFFFFFFF  
 @A00155:342:HHGFNDSXY:1:1635:24135:14857 1:N:0:GAACCTAG+TCCGCATA  
 ATCGGTACCCTGACCATCTGCTTTGAAGTGGACGTTATTTGACCACTTCAGTGTGCTAACCTACTAG  
 TTCTACGGTGTGTCATTCATCGTAATTATCTTGAAGTCGTGTGGGTCGTCGAACCTCACACCGCCAT  
 +  
 FFFFFFFFFFFFFFFFFFFFFFFFFF:FFFFFFFFFFFFFFFF:FFFFFFFF,FFFFFFFFFFFFFFFF  
 FFFFFFFFFFFFFFFFFFFFFFFFFF:FFFFFFFFFFFFFFFF:FFFFFFFF,FFFFFFFFFFFFFFFF  
 @A00155:342:HHGFNDSXY:1:1654:6659:19946 2:N:0:GAACCTAG+TCCGCATA  
 ATCGGTACCCTGACCATCTGCTTTGAAGTGGACGTTATTTGACCACTTCAGTGTGCTAACCTACTAG  
 TTCTACGGTGTGTCATTCATCGTAATTATCTTGAAGTCGTGTGGGTCGTCGAACCTCACACCGCCAT  
 +  
 FFFFF,FFFFFFFFFFFFFFFFFFFFFFFFFFFFFFFFFFFFFFFFFFFFFFFFFFFFFFFF,FFFFFFFF  
 FFFFFFFFFFFFFFFFFFFFFFFFFF:FFFFF:FFFFFFFF:FFFFFFFFFFFFFFFFFFFFFFFF  
 @A00155:342:HHGFNDSXY:1:1363:8467:16877 2:N:0:GAACCTAG+TCCGCATA  
 ATCGGTACCCTGACCATCTGCTTTGAAGTGGACGTTATTTGACCACTTCAGTGTGCTAACCTACTAG  
 TTCTACGGTGTGTCATTCATCGTAATTATCTTGAAGTCGTGTGGGTCGTCGAACCTCACACCGCCAT  
 +  
 FFFFFFFFFFFFFFFFFFFFFF:F:FFFFFFFFFFFFFFFFFFFFFFFFFFFFFFFFFFFFFFFF  
 FFFFFFFFFFFFFFFFFFFFFFFFFF:FFFFFFFFFFFFFFFF:FFFFFFFF,FFFFFFFF  
 @A00155:342:HHGFNDSXY:1:1332:17598:13369 2:N:0:GAACCTAG+TCCGCATA  
 ATCGGTACCCTGACCATCTGCTTTGAAGTGGACGTTATTTGACCACTTCAGTGTGCTAACCTACTAG  
 TTCTACGGTGTGTCATTCATCGTAATTATCTTGAAGTCGTGTGGGTCGTCGAACCTCACACCGCCAT  
 +  
 FFFFFFFFFFFFFFFFFFFFFF,FFFFFFFF:FFFFFFFFFFFFFFFF:FFFFFFFFFFFFFFFF  
 FFFFFFFFFFFFFFFFFFFFFFFFFF:FFFFF:FFFFFFFF:FFFFFFFFFFFFFFFF  
 @A00155:342:HHGFNDSXY:1:1259:4309:25081 1:N:0:GAACCTAG+TCCGCATA  
 ATCGGTACCCTGACCATCTGCTTTGAAGTGGACGTTATTTGACCACTTCAGTGTGCTAACCTACTAG  
 TTCTACGGTGTGTCATTCATCGTAATTATCTTGAAGTCGTGTGGGTCGTCGAACCTCACACCGCCAT  
 +  
 FFFFFFFFFFFFFFFFFFFFFFFFFF:FFFFFFFFFFFFFFFF:FFFFFFFFFFFFFFFF  
 FFFFFFFFFFFFFFFFFFFFFFFFFF,FF,:FFFFFFFFFFFFFFFF:FFFFFFFF  
 @A00155:342:HHGFNDSXY:1:2121:31620:28260 1:N:0:GAACCTAG+TCCGCATA  
 ATCGGTACCCTGACCATCTGCTTTGAAGTGGACGTTATTTGACCACTTCAGTGTGCTAACCTACTAG  
 TTCTACGGTGTGTCATTCATCGTAATTATCTTGAAGTCGTGTGGGTCGTCGAACCTCACACCGCCAT  
 +  
 FFFFFFFFFFFFFFFFFFFFFF:FFFFFFFFFFFFFFFF:FFFFFFFFFFFFFFFF  
 FFFFFFFFFFFFFFFFFFFFFFFFFF:FFFFFFFFFFFFFFFF:FFFFFFFF:FF  
 @A00155:342:HHGFNDSXY:1:1259:5041:14325 1:N:0:GAACCTAG+TCCGCATA  
 ATCGGTACCCTGACCATCTGCTTTGAAGTGGACGTTATTTGACCACTTCAGTGTGCTAACCTACTAG  
 TTCTACGGTGTGTCATTCATCGTAATTATCTTGAAGTCGTGTGGGTCGTCGAACCTCACACCGCCAT  
 +  
 FF,FFFFFFFFFFFF:FFFFF:.FFFFFFFFF:FFFFFFFF:FF:FFFFFFFFFFFFFFFF  
 FF,FFFFFFFFFFFF,FFFFFFFFFFFFFFFF:FFFFF:.F,FFFFFFFFFFFFFFFF

```
@A00155:342:HHGFNDSXY:1:2607:24686:2754 1:N:0:GAACCTAG+TCCGCATA
ATCGGTACCCTGACCATCTGCTTTGAAGTGGACGTTATTTGACCACTTCAGTGTGCTAACCTACTAG
TTCTACGGTGTGTCATTCATCGTAATTATCTTGAAGTCGTGTGGGTCGTGGAACCTCACACCGCCAT
+
FFFFFFFFFFFFFFFFFFFFFFFFFFFFFFFFFFFFFFFFFFFFFFFFFFFFFFFFFFFFFFFFFFFFFFFF
FFFFFFFFFFFFFFFFFFFFFFFFFFFFFFFFFFFFFFFFFFFFFFFFFFFFFFFFFFFFFFFFFFFFFFFF
@A00155:342:HHGFNDSXY:1:1332:18213:13526 2:N:0:GAACCTAG+TCCGCATA
ATCGGTACCCTGACCATCTGCTTTGAAGTGGACGTTATTTGACCACTTCAGTGTGCTAACCTACTAG
TTCTACGGTGTGTCATTCATCGTAATTATCTTGAAGTCGTGTGGGTCGTGGAACCTCACACCGCCAT
+
FFFFFFFFFFFFFFFFFFFFFFFFFFFFFFFFFFFFFFFFFFFFFFFFFFFFFFFFFFFFFFFFFFFFFFFF:FFF:F
FFFFFFFFFFFFFFFFFFFFFFFFFFFFFFFFFFFFFFFFFFFFFFFFFFFFFFFFFFFFFFFFFFFFFFFF
@A00155:342:HHGFNDSXY:1:1556:3929:36730 1:N:0:GAACCTAG+TCCGCATA
TCGGTACCCTGACCATCTGCTTTGAAGTGGACGTTATTTGACCACTTCAGTGTGCTAACCTACTAGT
TCTACGGTGTGTCATTCATCGTAATTATCTTGAAGTCGTGTGGGTCGTGGAACCTCACACCGCCATC
+
FFFFFFFFFFFFFFFFFFFFFFFFFFFFFFFFFFFFFFFFFFFFFFFFFFFFFFFFFFFFFFFFFFFFFFFF
FFFFFFFFFFFFFFFFFFFFFFFFFFFFFFFFFFFFFFFFFFFFFFFFFFFFFFFFFFFFFFFFFFFFFFFF
@A00155:342:HHGFNDSXY:1:1245:11650:5415 1:N:0:GAACCTAG+TCCGCATA
CGGTACCCTGACCATCTGCTTTGAAGTGGACGTTATTTGACCACTTCAGTGTGCTAACCTACTAGTT
CTACGGTGTGTCATTCATCGTAATTATCTTGAAGTCGTGTGGGTCGTGGAACCTCACACCGCC
+
FFFFFFFFFFFFFFFFFFFFFFFFFFFFFFFFFFFFFFFFFFFFFFFFFFFFFFFFFFFFFFFFFFFFFFFF
,FFFFFFFFFFFFFFFFFFFFFFFFFFFFFFFFFFFFFFFFFFFFFFFFFFFFFFFFFFFFFFFFFFFFFFFF
@A00155:342:HHGFNDSXY:1:2334:21350:14794 2:N:0:GAACCTAG+TCCGCATA
CGGTACCCTGACCATCTGCTTTGAAGTGGACGTTATTTGACCACTTCAGTGTGCTAACCTACTAGTT
TACGGTGTGTCATTCATCGTAATTATCTTGAAGTCGTGTGGGTCGTGGAACCTCACACCGCC
+
FFFFFFFFFFFFFFFFFFFFFFFFFFFFFFFFFFFFFFFFFFFFFFFFFFFFFFFFFFFFFFFFFFFFFFFF
FFFFFFFFFFFFFFFFFFFFFFFFFFFFFFFFFFFFFFFFFFFFFFFFFFFFFFFFFFFFFFFFFFFFFFFF
@A00155:342:HHGFNDSXY:1:2412:6027:30185 1:N:0:GAACCTAG+TCCGCATA
CGGTACCCTGACCATCTGCTTTGAAGTGGACGTTATTTGACCACTTCAGTGTGCTAACCTACTAGTT
CTACGGTGTGTCATTCATCGTAATTATCTTGAAGTCGTGTGGGTCGTGGAACCTCACACCGCCATCA
+
FFFFFFFFFFFFFFFFFFFFFFFFFFFFFFFFFFFFFFFFFFFFFFFFFFFFFFFFFFFFFFFFFFFFFFFF
FFFFFFFFFFFFFFFFFFFFFFFFFFFFFFFFFFFFFFFFFFFFFFFFFFFFFFFFFFFFFFFFFFFFFFFF
@A00155:342:HHGFNDSXY:1:2333:16080:14998 1:N:0:GAACCTAG+TCCGCATA
CGGTAACTGACCATCTGCTTTGAAGTGGACGTTATTTGACCACTTCAGTGTGCTAACCTACTAGTT
CTACGGTGTGTCATTCATCGTAATTATCTTGAAGTCGTGTGGGTCGTGGAACCTCACACCGCCATCA
+
FFFFFFFFFFFFFFFFFFFFFFFFFFFFFFFFFFFFFFFFFFFFFFFFFFFFFFFFFFFFFFFFFFFFFFFF
FFFFFFFFFFFFFFFFFFFFFFFFFFFFFFFFFFFFFFFFFFFFFFFFFFFFFFFFFFFFFFFFFFFFFFFF
@A00155:342:HHGFNDSXY:1:1259:5041:14325 2:N:0:GAACCTAG+TCCGCATA
GGTACCCTGACCATCTGCTTTGAAGTGGACGTTATTTGACCACTTCAGTGTGCTAACCTACTAGTTC
TACGGTGTGTCATTCATCGTAATTATCTTGAAGTCGGGTGGGTCGTGGAACCTCACACCGCCATCAA
+
:FFFFFFFFFFFF:FFFFFFFFFFFFFFFFFFFFFFFFFFFFFFFFFFFFFFFFFFFFFFFFFFFFFFFFFFFF
FFFFFFFFFFFF:FFFFFFFFFFFF:FFFFFFFFFFFFFFFFFFFFFFFFFFFFFFFFFFFFFFFFFFFFFFFF:
@A00155:342:HHGFNDSXY:1:1259:4309:25081 2:N:0:GAACCTAG+TCCGCATA
GGTACCCTGACCATCTGCTTTGAAGTGGACGTTATTTGACCACTTCAGTGTGCTAACCTACTAGTTC
TACGGTGTGTCATTCATCGTAATTATCTTGAAGTCGTGTGGGTCGTGGAACCTCACACCGCCATCAA
+
:FFFFFFFFFFFF:FFFFFFFFFFFFFFFFFFFFFFFFFFFFFFFFFFFFFFFFFFFFFFFFFFFFFFFFFFFF
FFFFFFFFFFFF:FFFFFFFFFFFF:FFFFFFFFFFFFFFFFFFFFFFFFFFFFFFFFFFFFFFFFFFFFFFFF:
```

@A00155:342:HHGFNDSXY:1:1376:23339:9189 2:N:0:GAACCTAG+TCCGCATA  
 CCTGACCATCTGCTTTGAAGTGGACGTTATTTGACCACTTCAGTGTGTAACCTACTAGTTCTACGG  
 TGTTGTCATTCATCGTAATTATCTTGAAGTCGTGTGGGTCGTGCAACCTCACACCGCCATCAAGATAT  
 +  
 FFFF:FFFFFFFFFFFFFFFFFFFFFFFFFFFFFFFFFFFFFFFFFFFFFFFFFFFFFFFFFFFFFFFF: , FFFF:FFF:FFF  
 FFFFFFFFFFFFFFFFFFFFFFFFFFFFFFFFFFFFFFFFFFFFFFFFFFFFFFFFFFFFFFFFFF, FFFFFFFFFFFFFFFFFFFFFFFF  
 @A00155:342:HHGFNDSXY:1:2546:17815:21167 2:N:0:GAACCTAG+TCCGCATA  
 CCTGACCATCTGCTTTGAAGTGGACGTTATTTGACCACTTCAGTGTGTAACCTACTAGTTCTACGG  
 TGTTGTCATTCATCGTAATTATCTTGAAGTCGTGTGGGTCGTGCAACCTCACACCGCCATCAAGATAT  
 +  
 FFFFFFFFFFFFFFFFFFFFFFFFFFFFFFFFFFFFFFFFFFFFFFFFFFFFFFFFFFFFFFFFFF, FF:FFFFFFFFF  
 FFFFFFFFFFFFFFFFFFFFFFFFFFFFFFFFFFFFFFFFFFFFFFFFFFFFFFFFFFFFFFFFF: FFFFFFFFFF  
 @A00155:342:HHGFNDSXY:1:2334:5791:32910 1:N:0:GAACCTAG+TCCGCATA  
 CCTGACCATCTGCTTTGAAGTGGACGTTATTTGACCACTTCAGTGTGTAACCTACTAGTTCTACGG  
 TGTTGTCATTCATCGTAATTATCTTGAAGTCGTGTGGGTCGTGCAACCTCACACCGCCATCAAGATAT  
 +  
 FFFFFFFFFFFFFFFFFFFFFFFFFFFFFFFFFFFFFFFFFFFFFFFFFFFFFFFFFFFFFFFFFF  
 FFFFFFFFFFFFFFFFFFFFFFFFFFFFFFFFFFFFFFFFFFFFFFFFFFFFFFFFFFFFFFFFF: FFFFFFFFFFFFFFFFFFFFFFFF  
 @A00155:342:HHGFNDSXY:1:1571:13150:29935 1:N:0:GAACCTAG+TCCGCATA  
 CCTGACCATCTGCTTTGAAGTGGACGTTATTTGACCACTTCAGTGTGTAACCTACTAGTTCTACGG  
 TGTTGTCATTCATCGTAATTATCTTGAAGTCGTGTGGGTCGTGCAACCTCACACCGCCATCAAGATAT  
 +  
 FFFFFFFFFFFFFFFFFFFFFFFFFFFFFFFFFFFFFFFFFFFFFFFFFFFFFFFFFFFFFFFFFF  
 FFFFFFFFFFFFFFFFFFFFFFFFFFFFFFFFFFFFFFFFFFFFFFFFFFFFFFFFFFFFFFFFF: FFFFFFFFFFFFFFFFFFFFFFFF  
 @A00155:342:HHGFNDSXY:1:2274:14886:31782 2:N:0:GAACCTAG+TCCGCATA  
 CCTGACCATCTGCTTTGAAGTGGACGTTATTTGACCACTTCAGTGTGTAACCTACTAGTTCTACGG  
 TGTTGTCATTCATCGTAATTATCTTGAAGTCGTGTGGGTCGTGCAACCTCACACCGCCATCAAGATAT  
 +  
 FFFFFFFF: FFFFFFFFFFFFFFFFFFFFFFFF: F: FFFFFFFFFFFFFFFFFFFFFFFFFF: FFF, FFFFFFFF  
 FFFFFFFFFFFFFFFFFFFFFFFFFF: FFFFFFFFFFFFFFFFFFFFFFFFFF: FFFFFFFFFFFFFFFFFFFFFFFF  
 @A00155:342:HHGFNDSXY:1:1621:18530:26788 1:N:0:GAACCTAG+TCCGCATA  
 CCTGACCATCTGCTTTGAAGTGGACGTTATTTGACCACTTCAGTGTGTAACCTACTAGTTCTACGG  
 TGTTGTCATTCATCGTAATTATCTTGAAGTCGTGTGGGTCGTGCAACCTCACACCGCCATCAAGATAT  
 +  
 FFFFFFFFFFFFFFFFFFFFFFFFFFFFFFFFFFFFFFFFFFFFFFFFFFFFFFFFFFFFFFFFF: F  
 FFFFFFFFFFFFFFFFFFFFFFFFFF: FFFFFF: FFFFFFFFFFFFFFFFFFFFFFFFFF  
 @A00155:342:HHGFNDSXY:1:2119:22923:34428 2:N:0:GAACCTAG+TCCGCATA  
 CCTGACCATCTGCTTTGAAGTGGACGTTATTTGACCACTTCAGTGTGTAACCTACTAGTTCTACGG  
 TGTTGTCATTCATCGTAATTATCTTGAAGTCGTGTGGGTCGTGCAACCTCACACCGCCATCAAGATAT  
 +  
 FFFFFFFFFFFFFFFFFFFFFFFFFFFFFFFFFFFFFFFFFFFFFFFFFFFFFFFFFFFFFFFFFF  
 FFFFFFFFFFFFFFFFFFFFFFFFFF: FFFFFFFFFFFFFFFFFFFFFFFFFF: FFFFFFFFFF  
 @A00155:342:HHGFNDSXY:1:1122:16857:7169 2:N:0:GAACCTAG+TCCGCATA  
 CTGACCATCTGCTTTGAAGTGGACGTTATTTGACCACTTCAGTGTGTAACCTACTAGTTCTACGGT  
 GTTGTCAATTCATCGTAATTATCTTGAAGTCGTGTGGGTCGTGCAACCTCACACCGCCATCAAGATATA  
 +  
 FFFFFFFFFFFFFFFFFFFFFFFFFFFFFFFFFFFFFFFFFFFFFFFFFFFFFFFFFFFFFFFFFF  
 FFFFFFFF, F: FFFFFFFFFF: FFFFFFFFFFFFFFFFFFFFFFFFFF: FFFFFFFFFF  
 @A00155:342:HHGFNDSXY:1:1323:10348:11553 2:N:0:GAACCTAG+TCCGCATA  
 CTGACCATCTGCTTTGAAGTGGACGTTATTTGACCACTTCAGTGTGTAACCTACTAGTTCTACGGT  
 GTTGTCAATTCATCGTAATTATCTTGAAGTCGTGTGGGTCGTGCAACCTCACACCGCCATCAAGATATA  
 +  
 FFF: FFFFFFFFFFFFFFFFFFFFFFFFFF: FFFFFFFFFFFFFFFFFFFFFFFFFF  
 FFFF: FFFFFFFFFF, FFF: FFFFFFFFFFFFFFFFFF: FFFFFFFFFFFFFFFFFF: FF

[illegible]



@A00155:342:HHGFNDSXY:1:1644:20943:8735 1:N:0:GAACCTAG+TCCGCATA  
TTGAAGTGGACGTTATTTTCGACCACTTCAGTGTGCGTAACCTACTAGTTCTACGGTGTGTCATTTCATCG  
GTAATTATCTTGAAGTCGTGTGGGTCGTGCGAACCTCACACCGCCATCAAGATATATGCCTGACATCCCC  
+  
FFFFFFFFFFFFFFFFFFFFFFFFFFFFFFFFFFFFFFFFFFFFFFFFFFFFFFFFFFFFFFFFFFFFFFFFFFFFFFFF  
FFFFFFFFFFFFFFFFFFFFFFFFFFFFFFFFFFFFFFFFFFFFFFFFFFFFFFFFFFFFFFFFFFFFFFFFFFFFFFFF  
@A00155:342:HHGFNDSXY:1:2546:17815:21167 1:N:0:GAACCTAG+TCCGCATA  
TGAAGTGGACGTTATTTTCGACCACTTCAGTGTGCGTAACCTACTAGTTCTACGGTGTGTCATTTCATCG  
TAATTATCTTGAAGTCGTGTGGGTCGTGCGAACCTCACACCGCCATCAAGATATATGCCTGACATCCCC  
+  
FFFFFFFFFFFFFFFFFFFFFFFFFFFFFFFFFFFFFFFFFFFFFFFFFFFFFFFFFFFFFFFFFFFFFFFFFFFFFFFF  
FFFFFFFFFFFFFFFFFFFFFFFFFFFFFFFFFFFFFFFFFFFFFFFFFFFFFFFFFFFFFFFFFFFFFFFFFFFFFFFF  
@A00155:342:HHGFNDSXY:1:2119:22923:34428 1:N:0:GAACCTAG+TCCGCATA  
TGAAGTGGACGTTATTTTCGACCACTTCAGTGTGCGTAACCTACTAGTTCTACGGTGTGTCATTTCATCG  
TAATTATCTTGAAGTCGTGTGGGTCGTGCGAACCTCACACCGCCATCAAGATATATGCCTGACATCCCC  
+  
FFFFFFFFFFFFFFFFFFFFFFFFFFFFFFFFFFFFFFFFFFFFFFFFFFFFFFFFFFFFFFFFFFFFFFFFFFFFFFFF  
FFFFFFFFFFFFFFFFFFFFFFFFFFFFFFFFFFFFFFFFFFFFFFFFFFFFFFFFFFFFFFFFFFFFFFFFFFFFFFFF  
@A00155:342:HHGFNDSXY:1:1249:31837:4116 1:N:0:GAACCTAG+TCCGCATA  
TGAAGTGGACGTTATTTTCGACCACTTCAGTGTGCGTAACCTACTAGTTCTACGGTGTGTCATTTCATCG  
TAATTATCTTGAAGTCGTGTGGGTCGTGCGAACCTCACACCGCCATCAAGATATATGCCTGACATCCCC  
+  
FFF:FFFFFFFFFFFFFFFFFFFFFFFFFFFFFFFFFFFFFFFFFFFFFFFFFFFFFFFFFFFFFFFFFFFFFFFFFFFF  
FFFFF:FFFFFFFFF:FFFFFFFFFFFFFFFFFFFFFFFFFFFFFFFFFFFFFFFFFFFFFFFFFFFFFFFFFFFFF  
@A00155:342:HHGFNDSXY:1:1246:21468:30029 1:N:0:GAACCTAG+TCCGCATA  
TGAAGTGGACGTTATTTTCGACCACTTCAGTGTGCGTAACCTACTAGTTCTACGGTGTGTCATTTCATCG  
TAATTATCTTGAAGTCGTGTGGGTCGTGCGAACCTCACACCGCCATCAAGATATATGCCTGACATCCCC  
+  
FFFFFFFFFFFFFFFFFFFFFFFFFFFFFFFFFFFFFFFFFFFFFFFFFFFFFFFFFFFFFFFFFFFFFFFFFFFFFFFF  
FFFFFFFFFFFFFFFFFFFFFFFFFFFFFFFFFFFFFFFFFFFFFFFFFFFFFFFFFFFFFFFFFFFFFFFFFFFFF:FFFFFFFFF:FFF  
@A00155:342:HHGFNDSXY:1:1420:7690:10802 1:N:0:GAACCTAG+TCCGCATA  
TGAAGTGGACGTTATTTTCGACCACTTCAGTGTGCGTAACCTACTAGTTCTACGGTGTGTCATTTCATCG  
TAATTATCTTGAAGTCGTGTGGGTCGTGCGAACCTCACACCGCCATCAAGATATATGCCTGACATCCCC  
+  
:FFFFFFFFFFFFFFFFFFFFFFFFFFFFFFFFFFFFFFFFFFFFFFFFFFFFFFFFFFFFFFFFFFFFFFFFFFFFF  
FFFFFFFFFFFFFFFFFFFFFFFFFFFFFFFFFFFFFFFFFFFFFFFFFFFFFFFFFFFFFFFFFFFFFFFFFFFFF:FFFFF,FF,FFFFFFFFFFFFFFFFFFFFF  
@A00155:342:HHGFNDSXY:1:1420:8070:13275 1:N:0:GAACCTAG+TCCGCATA  
TGAAGTGGACGTTATTTTCGACCACTTCAGTGTGCGTAACCTACTAGTTCTACGGTGTGTCATTTCATCG  
TAATTATCTTGAAGTCGTGTGGGTCGTGCGAACCTCACACCGCCATCAAGATATATGCCTGACATCCCC  
+  
FFFFFFFFFFFFFFFFFFFFF:FFFFFFFFFFFFF:FFFFFFFFFFFFFFFFFFFFFFFFFFFFFFFFFFFFFFFFFFFF  
FF:FFFFFFFFFFFFFFFFFFFFFFFFFFFFFFFFFFFFFFFFFFFFFFFFFFFFFFFFFFFFFFFFFFFFFFFFFFFF  
@A00155:342:HHGFNDSXY:1:2516:3224:18724 2:N:0:GAACCTAG+TCCGCATA  
GAAGTGGACGTTATTTTCGACCACTTCAGTGTGCGTAACCTACTAGTTCTACGGTGTGTCATTTCATCGT  
AATTATCTTGAAGTCGTGTGGGTCGTGCGAACCTCACACCGCCATCAAGATATATGCCTGACATCCCCG  
+  
FFFFFFFFFFFFF:FFFF:FFFFFFFFFFFFFFFFF,FFFFFFFFFFFFFFFFFFFFFFFFFFFFFFFFFFFFFFFF  
FFFFFFFFFFFFFFFFFFFFFFFFFFFFFFFFFFFFFFFFFFFFFFFFFFFFFFFFFFFFFFFFFFFFFFFFFFFFF  
@A00155:342:HHGFNDSXY:1:2412:6027:30185 2:N:0:GAACCTAG+TCCGCATA  
GAAGTGGACGTTATTTTCGACCACTTCAGTGTGCGTAACCTACTAGTTCTACGGTGTGTCATTTCATCGT  
AATTATCTTGAAGTCGTGTGGGTCGTGCGAACCTCACACCGCCATCAAGATATATGCCTGACATCCCCG  
+  
FFFFFFFFFFFFFFFFFFFFFFFFFFFFFFFFFFFFFFFFFFFF,FF:,FFF,FFFFFFFFF:FFFFFFFFFFFF:FFF  
FFFFFFFFFFFFFFFFF:FFFFF:FFFFFFFFFFFFFFFFF,FFFFFFFFFFFFFFFFFFFFFFFFF:FFFFFFFFF

[illegible]

@A00155:342:HHGFNDSXY:1:1560:14624:33896 2:N:0:GAACCTAG+TCCGCATA  
TATTTGACCACTTCAGTGTGTAACCTACTAGTTCTACGGTGTGTCATTCATCGTAATTATCTTGA  
AGTCGTGTGGGTCGTGCGAACCTCACACCGCCATCAAGATATATGCCTGACATCCCCGGCATCGGGAAC  
+  
FF::FFFFFF:, :FFFFFFFFFFFFFF:FFF:F:FFFFFFFFFFFFFF:FFF:FFFFFFFFFFFFFF:FFFFF  
FFFFFFFF:FFF:FFFFFFFFFFFFFF:FFFFFFFFFFFFFF:FFF:FFFFFFFFFFFFFF:FFFFFFFF  
@A00155:342:HHGFNDSXY:1:1420:7690:10802 2:N:0:GAACCTAG+TCCGCATA  
TATTTGACCACTTCAGTGTGTAACCTACTAGTTCTACGGTGTGTCATTCATCGTAATTATCTTGA  
AGTCGTGTGGGTCGTGCGAACCTCACACCGCCATCAAGATATATGCCTGACATCCCCGGCATCGGGAAC  
+  
FFFFFFFFFFFFFFFFFFFFFFFFFFFFFFFFFFFFFFFFFFFFFFFFFFFFFFFFFFFFFFFFFFFFFFFF  
FFFFFFFFFFFFFFFFFFFFFFFFFFFFFFFFFFFFFFFFFFFFFFFFFFFFFFFFFFFFFFFFFFFFFFFF  
@A00155:342:HHGFNDSXY:1:1420:8070:13275 2:N:0:GAACCTAG+TCCGCATA  
TATTTGACCACTTCAGTGTGTAACCTACTAGTTCTACGGTGTGTCATTCATCGTAATTATCTTGA  
AGTCGTGTGGGTCGTGCGAACCTCACACCGCCATCAAGATATATGCCTGACATCCCCGGCATCGGGAAC  
+  
FFFFFFFFFFFFFFFFFFFFFFFFFFFFFF:FFFFFFFFFFFFFFFFFFFFFFFFFFFFFFFFFFFFFF:FFFFF  
FFFFFFFFFFFFFFFFFFFFFFFFFFFFFFFFFFFFFFFFFFFFFFFFFFFFFFFFFFFFFFFFFFFFFF:FFFFF  
@A00155:342:HHGFNDSXY:1:1556:3929:36730 2:N:0:GAACCTAG+TCCGCATA  
CGACCACTTCAGTGTGTAACCTACTAGTTCTACGGTGTGTCATTCATCGTAATTATCTTGAAGTCG  
TGTGGGTCGTGCGAACCTCACACCGCCATCAAGATATATGCCTGACATCCCCGGCATCGGGAACCTCAGC  
+  
FFFFFFFFFFF:F:FFFFFFFFFFFFFFFFFFFFFFFFFFFFFFFFFFFFFFFFFFFFFFFFFFFFFFFF  
FFFFFFFFFFFFFFFFFFFFFF:FFFFFFFFFFFFFFFFFFFFFFFFFFFFFFFFFFFFFF:FFFFFFFFFFFFFFFF  
@A00155:342:HHGFNDSXY:1:2153:20247:32393 2:N:0:GAACCTAG+TCCGCATA  
CCACTTCAGTGTGTAACCTACTAGTTCTACGGTGTGTCATTCATCGTAATTATCTTGAAGTCGTGT  
GGGTCGTGCGAACCTCACACCGCCATCAAGATATATGCCTGACATCCCCGGCATCGGGAACCTCAGCCCT  
+  
:FFFFFF:FFFFFFFFFFFFFFFFFFFFFFFFFFFFFFFFFFFFFFFFFFFFFFFFFFFFFF:FFF:FFFFFFFF  
FFFFFFFFFFFFFFFFFFFFFFFFFFFFFF:FFFFF:FFFFFFFFFFFFFFFFFFFFFFFFFFFFFFFF  
@A00155:342:HHGFNDSXY:1:2644:32551:21856 2:N:0:GAACCTAG+TCCGCATA  
CCACTTCAGTGTGTAACCTACTAGTTCTACGGTGTGTCATTCATCGTAATTATCTTGAAGTCGTGT  
GGGTCGTGCGAACCTCACACCGCCATCAAGATATATGCCTGACATCCCCGGCATCGGGAACCTCAGCCCT  
+  
FFFFF:FFFFFF: :FFFF:FF:FFFFFFFFFF:FF:FFFFF:FFFF: : :FFFFFFFFFFFFFFFF  
F:FFFFFFFFFFFFFFFFFFFFFFFFFFFFFF:FFFFF:FFFFFFFFFFFFFFFFFFFFFFFFFFFFFF  
@A00155:342:HHGFNDSXY:1:1562:3242:7232 1:N:0:GAACCTAG+TCCGCATA  
ACTTCAGTGTGTAACCTACTAGTTCTACGGTGTGTCATTCATCGTAATTATCTTGAAGTCGTGTGG  
GTCGTGCGAACCTCACACCGCCATCAAGATATATGCCTGACATCCCCGGCATCGGGAACCTCAGCC  
+  
FFFFFFFFFFFFFFFFFFFFFFFFFFFFFF:FFFFFFFFFFFFFFFFFFFFFFFFFFFFFFFFFFFFFF  
FFFFFFFFFFFFFFFFFFFFFFFFFFFFFFFFFFFFFFFFFFFFFFFFFFFFFFFFFFFFFFFFFFFFFF:FFFFF  
@A00155:342:HHGFNDSXY:1:1622:21034:32127 2:N:0:GAACCTAG+TCCGCATA  
TTCAGTGTGTAACCTACTAGTTCTACGGTGTGTCATTCATCGTAATTATCTTGAAGTCGTGTGGGT  
CGTGAACCTCACACCGCCATCAAGATATATGCCTGACATCCCCGGCATCGGGAACCTCAGCCCTAATC  
+  
FFFFFFFFFFFFFFFFFFFFFFFFFFFFFF:FFFFFFFFFFFFFFFFFFFFFFFFFFFFFFFFFFFFFF  
FFFFFFFFFFFFFF:FFFFFFFFFFFFFFFFFFFFFFFFFFFFFFFFFFFFFFFFFFFFFFFFFFFFFF  
@A00155:342:HHGFNDSXY:1:1642:1886:11428 2:N:0:GAACCTAG+TCCGCATA  
TTCAGTGTGTAACCTACTAGTTCTACGGTGTGTCATTCATCGTAATTATCTTGAAGTCGTGTGGGT  
CGTGAACCTCACACCGCCATCAAGATATATGCCTGACATCCCCGGCATCGGGAACCTCAGCCCTAATC  
+  
FFFFFFFFFFFFFFFF:FFFFFFF, FFFFFFFFFFFFFFFFFF:FFF:FFFFFF:FFFFFFFFFFFFFFFF  
:FFFFFFFFF:FFFFFFFFFFFFFFFF: :FFFFFFFFFFFFFFFFFFFFFFFFFFFFFFFFFFFFFF:FF

@A00155:342:HHGFNDSXY:1:1642:1588:7686 2:N:0:GAACCTAG+TCCGCATA  
TTCAGTGTCTAACCTACTAGTTCTACGGTGTGTCATTCATCGTAATTATCTTGAAGTCGTGTGGGT  
CGTCGAACCTCACACCGCCATCAAGATATATGCCTGACATCCCCGGCATCGGGAACCTCAGCCCTAATC  
+  
F:FFFFFFFF:FFFFFFFFFFFFFFFFFFFFFFFF,F::FF,FF:FFFFFFFF,FFFFFFFFFFFFFFFF:  
FFFFFFFFFFFFFFFFFFFFFFFFFFFFFFFF:FFFFFFFFFFFFFFFFFFFFFFFFFFFFFFFF:FFFFFFFFFFFF:F  
@A00155:342:HHGFNDSXY:1:2632:7672:32910 2:N:0:GAACCTAG+TCCGCATA  
AGTGTCTAACCTACTAGGTCTACGGTGTGTCATTCATCGTAATTATCTTGAAGTCGTGTGGGTCTGT  
CGAACCTCACACCGCCATCAAGATATATGCCTGACATCCCCGGCATCGGGAACCTCAGCCCTAATCGCT  
+  
:FFFFFF::F,:FFFF,:F,FFFF:FFFFFFFF,FF:FF:FFFFFFFFFFFFFFFF,FFFFFF:FFF  
FFF:FFFFFFFFFFFF:FF:F:FF:FFFFFFFFFFFFFFFF,FFFF:FFF,FFFFFF:FFFFFFFF,F:F  
@A00155:342:HHGFNDSXY:1:1507:30409:34679 2:N:0:GAACCTAG+TCCGCATA  
GTCGTAACCTACTAGTTCTACGGTGTGTCATTCATCGTAATTATCTTGAAGTCGTGTGGGTCTGTCTGA  
ACCTCACACCGCCATCAAGATATATGCCTGACATCCCCGGCATCGGGAACCTCAGCCCTAATCGC  
+  
FFFFFFFFFFFFFFFFFFFFFFFFFFFFFFFF:FFFFFFFFFFFFFFFFFFFFFFFFFFFFFFFFFFFFFFFF  
FFFFFFFFFFFFFFFFFFFFFFFFFFFFFFFF:FFFFFFFFFFFFFFFFFFFFFFFFFFFFFFFFFFFFFFFF  
@A00155:342:HHGFNDSXY:1:2642:14018:7420 2:N:0:GAACCTAG+TCCGCATA  
GTCGTAACCTACTAGTTCTACGGTGTGTCATTCATCGTAATTATCTTGAAGTCGTGTGGGTCTGTCTGA  
ACCTCACACCGCCATCAAGATATATGCCTGACATCCCCGGCATCGGGAACCTCAGCCCTAATCGCT  
+  
FFFFFFFFFFF,F:FFFFFFFFFFFFFFFFFFFFFFFFFFFFFFFF:FFFFFFFFFFFFFFFFFFFFFFFFFFFF  
FFFFFFFF:FFFFFFFFFFFFFFFFFFFFFFFFFFFFFFFF:FFFFFFFFFFFFFFFF:FFFFFFFFFFFFFFFF:  
@A00155:342:HHGFNDSXY:1:1602:23411:32456 2:N:0:GAACCTAG+TCCGCATA  
GTCGTAACCTACTAGTTCTACGGTGTGTCATTCATCGTAATTATCTTGAAGTCGTGTGGGTCTGTCTGA  
ACCTCACACCGCCATCAAGATATATGCCTGACATCCCCGGCATCGGGAACCTCAGCCCTAATCGCTT  
+  
FFFFFFFFFFFF:FFFFFFFFFFFFFFFF:FFFFFFFF:FFFFFFFFFFFFFFFFFFFFFFFFFFFFFFFF  
FFFFFFFFFFFFFFFFFFFFFFFFFFFFFFFFFFFFFFFFFFFFFFFFFFFFFFFFFFFFFFFF:FFFFFFFFFFFF  
@A00155:342:HHGFNDSXY:1:1444:22806:32158 1:N:0:GAACCTAG+TCCGCATA  
GTAACCTACTAGTTCTACGGTGTGTCATTCATCGTAATTATCTTGAAGTCGTGTGGGTCTGTCTGAACCT  
TCACACCGCCATCAAGATATATGCCTGACATCCCCGGCATCGGGAACCTCAGCCCTAATCGCTTCGCTC  
+  
FFFFFFFFFFFFFFFFFFFFFFFFFFFFFFFFFFFFFFFFFFFFFFFFFFFFFFFFFFFFFFFFFFFFFFFF  
FFFFFFFFFFFFFFFFFFFFFFFFFFFFFFFFFFFFFFFF:FFFFF:FFFFFFFFF:FFFFFFFFFFFFFFFF  
@A00155:342:HHGFNDSXY:1:1508:16649:11600 2:N:0:GAACCTAG+TCCGCATA  
GAACCTACTAGTTCTACGGTGTGTCATTCATCGTAATTATCTTGAAGTCGTGTGGGTCTGTCTGAACCT  
CACACCGCCATCAAGATATATGCCTGACATCCCCGGCATCGGGAACCTCAGCCCTAATCGCTTCGCT  
+  
FFFFFFFFFFFF:FFFFFFFFFFFF:FFFFFFFFFFFFFFFFFFFFFFFFFFFFFFFFFFFFFFFFFFFF  
FFFFFFFFFFFF:FFFFFFFFFFFFFFFFFFFFFFFFFFFFFFFFFFFFFFFFFFFFFFFFFFFFFFFFFFFF  
@A00155:342:HHGFNDSXY:1:2175:1488:11115 2:N:0:GAACCTAG+TCCGCATA  
CCTACTAGTTCTACGGTGTGTCATTCATCGTAATTATCTTGAAGTCGTGTGGGTCTGTCTGAACCTCAC  
ACCGCCATCAAGATATATGCCTGACATCCCCGGCATCGGGAACCTCAGCCCTAATCGCTTCGCTCACTG  
+  
FFFFFFF,F:FFFFFF:FF,F::FF:FF,FF,FF,FFFF,,FFFFFFFF:FFFF:F:FFFFFFFFFFFF  
FFFFFFFFFFFFFFFFFFFFFFFF:FFFFFFFFFFFFFFFFFFFFFFFFFFFFFFFF:FFFF::FFF:FFFFFFFF:FFFF  
@A00155:342:HHGFNDSXY:1:1360:21658:22060 2:N:0:GAACCTAG+TCCGCATA  
CTACTAGTTCTACGGTGTGTCATTCATCGTAATTATCTTGAAGTCGTGTGGGTCTGTCTGAACCTCACA  
CCGCCATCAAGATATATGCCTGACATCCCCGGCATCGGGAACCTCAGCCCTAATCGCTTCGCTCACTGC  
+  
FFFFFFFFFFFFFFFFFFFFFFFFFFFFFFFF:FFFF:FFFFFFFFFFFFFFFFFFFFFFFFFFFFFFFFFFFF  
FFFFFFFFFFFFFFFFFFFFFFFFFFFFFFFF:FFFFFFFFFFFFFFFFFFFFFFFFFFFFFFFFFFFFFFFFFFFF,FFFF

[illegible]

```
@A00155:342:HHGFNDSXY:1:2632:28664:8422 1:N:0:GAACCTAG+TCCGCATA
TTCTACGGTGTTGTCATTCATCGTAATTATCTTGAAGTCGTGTGGGTCGTCGAACCTCACACCGCCAT
CAAGATATATGCCTGACATCCCCGGCATCGGGAActCAGCCCTAATCGCTTCGCTACTGCCGCTGA
+
FFFFFFFFFFFFFFFFFFFFFFFFFFFFFFFFFFFFFFFFFFFFFFFFFFFFFFFFFFFFF:FFFFFF:FFFFF:FFF:FFF
FFFFFFFFFFFF:FFFFFFFFFFFFFFFFFFFFFFFFFFFF:FFFFFF,F:F:FF,FFFFFFFFFF,FFF:FFFF:
@A00155:342:HHGFNDSXY:1:1548:29577:15170 1:N:0:GAACCTAG+TCCGCATA
TTCTACGGTGTTGTCATTCATCGTAATTATCTTGAAGTCGTGTGGGTCGTCGAACCTCACACCGCCAT
CAAGATATATGCCTGACATCCCCGGCATCGGGAActCAGCCCTAATCGCTTCGCTACTGCCGCTGAT
+
FFFFFFFFFFFFFFFFFFFFFFFFFFFFFFFFFFFFFFFFFFFFFFFFFFFFFFFFFFFFFFFFFFFFFFFFFFFFF
FFFFFFFFFFFFFFFFFFFFFFFFFFFFFFFFFFFFFFFFFFFFFFFFFFFFFFFFFFFFFFFFFFFFFFFFFFFFF,
FFFFFFFFFFFFFFFFFFFFFFFFFFFFFFFFFFFFFFFFFFFFFFFFFFFFFFFFFFFFFFFFFFFFFFFFFFFFF
@A00155:342:HHGFNDSXY:1:2213:9824:28025 1:N:0:GAACCTAG+TCCGCATA
TTCTACGGTGTTGTCATTCATCGTAATTATCTTGAAGTCGTGTGGGTCGTCGAACCTCACACCGCCAT
CAAGATATATGCCTGACATCCCCGGCATCGGGAActCAGCCCTAATCGCTTCGCTACTGCCGCTGAT
+
FFFFFFFFFFFFFFFFFFFFFFFFFFFFFFFFFFFFFFFFFFFFFFFFFFFFFFFFFFFFFFFFFFFFFFFFFFFFF
FFFFFFFFFFFFFFFFFFFFFFFFFFFFFFFFFFFFFFFFFFFFFFFFFFFFFFFFFFFFFFFFFFFFFFFFFFFFF,
FFFFFFFFFFFFFFFFFFFFFFFFFFFFFFFFFFFFFFFFFFFFFFFFFFFFFFFFFFFFFFFFFFFFFFFFFFFFF
@A00155:342:HHGFNDSXY:1:1209:18611:20322 1:N:0:GAACCTAG+TCCGCATA
TTCTACGGTGTTGTCATTCATCGTAATTATCTTGAAGTCGTGTGGGTCGTCGAACCTCACACCGCCAT
CAAGATATATGCCTGACATCCCCGGCATCGGGAActCAGCCCTAATCGCTTCGCTACTGCCGCTGAT
+
FFFFFFFFFFFFFFFFFFFFFFFFFFFFFFFFFFFFFFFFFFFFFFFFFFFFFFFFFFFFFFFFFFFFFFFFFFFFF:
FFFFFFFFFFFFFFFFFFFFFFFFFFFFFFFFFFFFFFFFFFFFFFFFFFFFFFFFFFFFFFFFFFFFFFFFFFFFF
FFFFFFFFFFFFF:FFFFFFFFFFFFFFFFFFFFFFFFFFFFFFFFFFFFFFFFFFFFFFFFFFFFFFFFFFFFFFFFFFFFF
@A00155:342:HHGFNDSXY:1:2632:28845:8797 1:N:0:GAACCTAG+TCCGCATA
TTCTACGGTGTTGTCATTCATCGTAATTATCTTGAAGTCGTGTGGGTCGTCGAACCTCACACCGCCAT
CAAGATATATGCCTGACATCCCCGGCATCGGGAActCAGCCCTAATCGCTTCGCTACTGCCGCTGAT
+
FFFFFFFFFFFFFFFFFFFFFFFFFFFFFFFFFFFFFFFFFFFFFFFFFFFFFFFFFFFFFFFFFFFFFFFFFFFFF:
FFFFFFFFFFFFFFFFFFFFFFFFFFFFFFFFFFFFFFFFFFFFFFFFFFFFFFFFFFFFFFFFFFFFFFFFFFFFF:
FFFFFFFFFFFFF:FFF,FFFFFFFFFF,FFFFFFFFFFFFF:FFFF::F
@A00155:342:HHGFNDSXY:1:1407:25455:18270 1:N:0:GAACCTAG+TCCGCATA
TTCTACGGTGTTGTCATTCATCGTAATTATCTTGAAGTCGTGTGGGTCGTCGAACCTCACACCGCCAT
CAAGATATATGCCTGACATCCCCGGCATCGGGAActCAGCCCTAATCGCTTCGCTACTGCCGCTGAT
+
FFFFFFFFFFFFFFFFFFFFFFFFFFFFFFFFFFFFFFFFFFFFFFFFFFFFFFFFFFFFFFFFFFFFFFFFFFFFF
FFFFFFFFFFFFF:FFFFFFFFFFFFFFFFFFFFFFFFFFFFFFFFFFFFFFFFFFFFFFFFFFFFFFFFFFFFFFFFFFFFF
@A00155:342:HHGFNDSXY:1:2233:23511:28025 1:N:0:GAACCTAG+TCCGCATA
TTCTACGGTGTTGTCATTCATCGTAATTATCTTGAAGTCGTGTGGGTCGTCGAACCTCACACCGCCAT
CAAGATATATGCCTGACATCCCCGGCATCGGGAActCAGCCCTAATCGCTTCGCTACTGCCGCTGAT
+
FFFFFFFFFFFFFFFFFFFFFFFFFFFFFFFFFFFFFFFFFFFFFFFFFFFFFFFFFFFFFFFFFFFFFFFFFFFFF
FFFFFFFFFFFFFFFFFFFFFFFFFFFFFFFFFFFFFFFFFFFFFFFFFFFFFFFFFFFFFFFFFFFFFFFFFFFFF
@A00155:342:HHGFNDSXY:1:2233:23466:28510 1:N:0:GAACCTAG+TCCGCATA
TTCTACGGTGTTGTCATTCATCGTAATTATCTTGAAGTCGTGTGGGTCGTCGAACCTCACACCGCCAT
CAAGATATATGCCTGACATCCCCGGCATCGGGAActCAGCCCTAATCGCTTCGCTACTGCCGCTGAT
+
FFFFFFFFFFFFFFFFFFFFFFFFFFFFFFFFFFFFFFFFFFFFFFFFFFFFFFFFFFFFFFFFFFFFFFFFFFFFF
FFFFFFFFFFFFFFFFFFFFFFFFFFFFFFFFFFFFFFFFFFFFFFFFFFFFFFFFFFFFFFFFFFFFFFFFFFFFF
@A00155:342:HHGFNDSXY:1:2604:15121:7795 1:N:0:GAACCTAG+TCCGCATA
TTCTACGGTGTTGTCATTCATCGTAATTATCTTGAAGTCGTGTGGGTCGTCGAACCTCACACCGCCAT
CAAGATATATGCCTGACATCCCCGGCATCGGGAActCAGCCCTAATCGCTTCGCTACTGCCGCTGAT
+
```

@A00155:342:HHGFNDSXY:1:1621:18530:26788 2:N:0:GAACCTAG+TCCGCATA  
TACGGTGTTCATTTCATCGTAATTATCTTGAAGTCGTGTGGGTCGTGCGAACCTCACACCGCCATCAA  
GATATATGCCTGACATCCCCGGCATCGGGAACCTCAGCCCTAATCGCTTCGCTCACTGCCGCTGATGCG  
+  
FFFFFFFFFFFFFFFF:FFFFFFFFFFFFFFFFFFFFFFFFFFFFFFFFFFFFFFFFFFFFFFFFFFFFFFFF  
FFFFFFFFFFFFFFFF:FFFFFFFFFFFFFFFFFFFFFFFFFFFFFFFFFFFFFFFF:FFFF:FFFFFFFFFFFFFFFF  
@A00155:342:HHGFNDSXY:1:1508:16649:11600 1:N:0:GAACCTAG+TCCGCATA  
ACGGTGTTCATTTCATCGTAATTATCTTGAAGTCGTGTGGGTCGTGCGAACCTCACACCGCCATCAAG  
ATATATGCCTGACATCCCCGGCATCGGGAACCTCAGCCCTAATCGCTTCGCTCACTGCCGCTGATGCG  
+  
FFFFFFFFFFFFFFFF:FFFFFFFFFFFFFFFFFFFFFFFFFFFFFFFFFFFFFFFFFFFFFFFFFFFFFFFF:FF  
FF,FFFFFFFFFFFFFFFF:FFFFFFFFFFFFFFFFFFFFFFFFFFFFFFFFFFFFFFFFFFFFFFFFFFFFFFFF  
@A00155:342:HHGFNDSXY:1:1110:24261:28698 2:N:0:GAACCTAG+TCCGCATA  
ACGGTTTTGTTCATTTCATCGTAATTATCTTGAAGTCGTGTGGGTCGTGCGAACCTCACACCGCCATCAAG  
ATATATGCCTGACATCCCCGGCATCGGGAACCTCAGCCCTAATCGCTTCGCTCACTGCCGCTGATGCGA  
+  
FFFF:FFF:FFFFFFFFFFFFFFFFFFFFFFFFFFFFFFFFFFFFFFFFFFFFFFFFFFFFFFFF:FF::FFFFFFFFFF  
FFFFFFFF:FFFFFFFFFFFFFFFFFFFFFFFF,FFFFFFFF:FFFFFFFF:FFFFFFFFFFFFFF,F,FFFF:FF  
@A00155:342:HHGFNDSXY:1:2457:29188:34945 1:N:0:GAACCTAG+TCCGCATA  
GTGTTGTTCATTTCATCGTAATTATCTTGAAGTCGTGTGGGTCGTGCGAACCTCACACCGCCATCAAGATA  
TATGCCTGACATCCCCGGCATCGGGAACCTCAGCCCTAATCGCTTCGCTCACTGCCGCTGATGCGAAGT  
+  
FFF:FFFFFFFFFFFFFFFFFFFFFFFFFFFFFFFFFFFFFFFFFFFFFFFFFFFFFFFFFFFFFFFFFFFFF  
FFFFFFFFFFFFFFFFFFFFFFFFFFFFFFFFFFFFFFFFFFFFFFFFFFFFFFFF:FFFFFFFFFFFFFFFFFFFFF  
@A00155:342:HHGFNDSXY:1:1225:7726:28870 1:N:0:GAACCTAG+TCCGCATA  
GTGTTGTTCATTTCATCGTAATTATCTTGAAGTCGTGTGGGTCGTGCGAACCTCACACCGCCATCAAGATA  
TATGCCTGACATCCCCGGCATCGGGAACCTCAGCCCTAATCGCTTCGCTCACTGCCGCTGATGCGAAGT  
+  
FFFFFFFFFFFFFFFFFFFFFFFFFFFFFFFFFFFFFFFF:FFFFFFFFFFFFFF:FFFFFFFFFFFFFFFFFFFF  
FFFFFFFFFFFFFFFFFFFFFFFFFFFFFFFF:FFFFFFFFFFFFFFFFFFFFFFFFFFFFFFFF:FFFFFFFFFFFFF  
@A00155:342:HHGFNDSXY:1:1601:26612:24659 2:N:0:GAACCTAG+TCCGCATA  
TGTTGTTCATTTCATCGTAATTATCTTGAAGTCGTGTGGGTCGTGCGAACCTCACACCGCCATCAAGATAT  
ATGCCTGACATCCCCGGCATCGGGAACCTCAGCCCTAATCGCTTCGCTCACTGCCGCTGATGCGAAGTT  
+  
FFFFFFFF,FFFFFFFF:FFF:FFFFFFFF:FFFF:F,:FFF,F:FF:FFFF::FFFFFFFF,FFFF  
:FF:F:FFFFFFFFFFFFFFFFFFFF,FF:FFFFFFFF:FFF:FF:FFFF,,FF:FFFFFFFF:F:F  
@A00155:342:HHGFNDSXY:1:1245:7952:30921 1:N:0:GAACCTAG+TCCGCATA  
TGTTGTTCATTTCATCGTAATTATCTTGAAGTCGTGTGGGTCGTGCGAACCTCACACCGCCATCAAGATAT  
ATGCATGACATCCCCGGCATCGGGAACCTCAGCCCTAATCGCTTCGCTCACTGCCGCTGATGCGAAGTT  
+  
FFFFFFFFFFFFFFFFFFFFFFFFFFFFFFFFFFFFFFFFFFFFFFFFFFFFFFFFFFFFFFFFFFFFFFFFF  
FFFF,FFFFFFFFFFFFFFFFFFFFFFFFFFFFFFFFFFFFFFFFFFFFFFFFFFFFFFFFFFFFFFFFFFFFF  
@A00155:342:HHGFNDSXY:1:2142:2763:33646 2:N:0:GAACCTAG+TCCGCATA  
GTTGTTCATTTCATCGTAATTATCTTGAAGTCGTGTGGGTCGTGCGAACCTCACACCGCCATCAAGATATA  
TGCTGACATCCCCGGCATCGGGAACCTCAGCCCTAATCGCTTCGCTCACTGCCGCTGATGCGAAGTTT  
+  
FFFFFFFFFFFFFFFFFFFFFFFFFFFFFFFFFFFFFFFFFFFFFFFFFFFFFFFFFFFFFFFFFFFFFFFFF  
FFFFFFFFFFFFFFFFFFFFFFFFFFFFFFFFFFFFFFFFFFFFFFFFFFFFFFFFFFFFFFFFFFFFFFFFF  
@A00155:342:HHGFNDSXY:1:1319:5972:24267 1:N:0:GAACCTAG+TCCGCATA  
TTGTTCATTTCATCGTAATTATCTTGAAGTCGTGTGGGTCGTGCGAACCTCACACCGCCATCAAGATATAT  
GCCTGACATCCCCGGCATCGGGAACCTCAGCCCTAATCGCTTCGCTCACTGCCGCTGATGCGAAGTTTG  
+  
FFFFFFFFFFFFFFFFFFFFFFFFFFFFFFFF:FFFFFFFFFFFFFFFFFFFFFFFFFFFFFFFFFFFFFFFFF  
FFFFFFFFFFFFFFFFFFFFFFFFFFFFFFFF:FFFFFFFFFFFFFFFFFFFFFFFFFFFFFFFFFFFFFFFFF

[illegible]



[illegible]

[illegible]

[illegible]

@A00155:342:HHGFNDSXY:1:1543:5339:12524 2:N:0:GAACCTAG+TCCGCATA  
CATTTCATCGTAATTATCTTGAAGTCGTGTGGGTCGTGCGAACCTCACACCGCCATCAAGATATATGCCT  
GACATCCCCGGCATCGGGAACCTCAGCCCTAATCGCTTCGCTCACTGCCGCTGATGCGAAGTTTGATGC  
+  
FFFFFFFFFFFFFFFF:FFFFFFFFFFFFFFFFFFFFFFFFFFFFFFFFFFFFFFFFFFFFFFFFFFFFFFFF  
FFFFFFFFFFFFFFFFFFFFFFFFFFFFFFFFFFFFFFFFFFFFFFFFFFFFFFFFFFFFFFFFFFFFFFFF  
@A00155:342:HHGFNDSXY:1:2443:1362:30686 1:N:0:GAACCTAG+TCCGCATA  
CATTTCATCGTAATTATCTTGAAGTCGTGTGGGTCGTGCGAACCTCACACCGCCATCAAGATATATGCCT  
GACATCCCCGGCATCGGGAACCTCAGCCCTAATCGCTTCGCTCACTGCCGCTGATGCGAAGTTTGATGC  
+  
FFFFFFFFFFFFFFFFFFFFFFFF:FFFFFFFFFFFFFFFF:FF:F:FFFF:FFFFFFFFFFFFFFFFFFFF  
FFFFFFFFFFFFFFFFFFFFFFFF:FFF:F:FFFFFFFF,FF,FFF:FFFF,:FFFFFF,FF:F:FFF,:F:F  
@A00155:342:HHGFNDSXY:1:2265:5330:11130 1:N:0:GAACCTAG+TCCGCATA  
ATTTCATCGTAATTATCTTGAAGTCGTGTGGGTCGTGCGAACCTCACACCGCCATCAAGATATATGCCTG  
ACATCCCCGGCATCGGGAACCTCAGCCCTAATCGCTTCGCTCACTGCCGCTGATGCGAAGTTTGATGCA  
+  
FFFFFFFFFFFFFFFFFFFFFFFFFFFFFFFFFFFFFFFF:FFFFFFFFFFFF:FFFFFFFFFFFFFFFFFFFF  
FF:FFFF:FFFFFFFF:FFFFFFFFFFFFFFFFFFFFFFFFFFFFFFFFFFFF,FFFFFFFF,FFFFFFFFFFFF  
@A00155:342:HHGFNDSXY:1:1639:7238:15123 1:N:0:GAACCTAG+TCCGCATA  
TCATCGTAATTATCTTGAAGTCGTGTGGGTCGTGCGAACCTCACACCGCCATCAAGATATATGCCTGAC  
ATCCCCGGCATCGGGAACCTCAGCCCTAATCGCTTCGCTCACTGCCGCTGATGCGAAGTTTGATGCAGA  
+  
FFFFFFFFFFFFFFFFFFFFFFFFFFFFFFFFFFFFFFFFFFFFFFFFFFFFFFFFFFFFFFFFFFFFFFFFFFFF  
FFFFFFFFFFFFFFFFFFFFFFFFFFFFFFFFFFFFFFFFFFFFFFFFFFFFFFFFFFFFFFFFFFFFFFFFFFFF  
@A00155:342:HHGFNDSXY:1:2507:15646:1720 2:N:0:GAACCTAG+TCCGCATA  
TCATCGTAATTATCTTGAAGTCGTGTGGGTCGTGCGAACCTCACACCGCCATCAAGATATATGCCTGAC  
ATCCCCGGCATCGGGAACCTCAGCCCTAATCGCTTCGCTCACTGCCGCTGATGCGAAGTTTGATGCAGA  
+  
FFFFFFFFFFFFFF,FFFFFFFFFFFFFFFF:FFFF:FFFFFFFFFFFFFFFFFFFFFFFFFFFFFFFFFFFF  
,FFFF:FFFFFFFFFFFFFFFF:FFFFFFFFFFFFFFFFFFFFFFFFFFFFFFFFFFFFFFFFFFFFFFFFFFFF  
@A00155:342:HHGFNDSXY:1:2601:26982:17597 1:N:0:GAACCTAG+TCCGCATA  
TCATCGTAATTATCTTGAAGTCGTGTGGGTCGTGCGAACCTCACACCGCCATCAAGATATATGCCTGAC  
ATCCCCGGCATCGGGAACCTCAGCCCTAATCGCTTCGCTCACTGCCGCTGATGCGAAGTTTGATGCAGA  
+  
FFFFFFFFFFFFFFFFFFFFFFFFFFFFFFFFFFFFFFFFFFFFFFFFFFFFFFFFFFFFFFFFFFFFFFFFFFFF  
FFFFFFFFFFFFFFFFFFFFFFFFFFFFFFFFFFFFFFFFFFFFFFFFFFFFFFFFFFFFFFFFFFFFFFFF:FFF  
@A00155:342:HHGFNDSXY:1:1464:30987:30389 1:N:0:GAACCTAG+TCCGCATA  
TCATCGTAATTATCTTGAAGTCGTGTGGGTCGTGCGAACCTCACACCGCCATCAAGATATATGCCTGAC  
ATCCCCGGCATCGGGAACCTCAGCCCTAATCGCTTCGCTCACTGCCGCTGATGCGAAGTTTGATGCAGA  
+  
FFFFFFFFFFFFFFFFFFFFFFFFFFFFFFFFFFFFFFFFFFFFFFFFFFFFFFFFFFFFFFFFFFFFFFFFFFFF  
FFFFFFFFFFFFFFFFFFFFFFFFFFFFFFFFFFFFFFFFFFFFFFFFFFFFFFFFFFFFFFFFFFFFFFFFFFFF  
@A00155:342:HHGFNDSXY:1:2575:16721:10097 1:N:0:GAACCTAG+TCCGCATA  
TCGTAATTATCTTGAAGTCGTGTGGGTCGTGCGAACCTCACACCGCCATCAAGATATATGCCTGACATC  
CCGGCATCGGGAACCTCAGCCCTAATCGCTTCGCTCACTGCCGCTGATGCGAAGTTTGATGCAGAGTA  
+  
FFFFFFFFFFFFFFFFFFFFFFFFFFFFFFFFFFFFFFFFFFFFFFFFFFFFFFFFFFFFFFFFFFFFFFFFFFFF  
FFFFFFFFFFFFFFFFFFFFFFFFFFFFFFFFFFFFFFFFFFFFFFFFFFFFFFFFFFFFFFFFFFFFFFFFFFFF  
@A00155:342:HHGFNDSXY:1:2108:29686:25473 1:N:0:GAACCTAG+TCCGCATA  
TCGTAATTATCTTGAAGTCGTGTGGGTCGTGCGAACCTCACACCGCCATCAAGATATATGCCTGACATC  
CCGGCATCGGGAACCTCAGCCCTAATCGCTTCGCTCACTGCCGCTGATGCGAAGTTTGATGCAGAGTA  
+  
FFFFFFFFFFFFFF:FFFFFFFFFFFFFFFFFFFFFFFFFFFFFFFFFFFFFFFFFFFFFFFF:F:FFF:FFFFFFFF  
FFFFFFFFFFFFFFFF:FFFFFFFFFFFFFFFF:FFFFFFFFFFFFFFFFFFFFFFFFFFFFFFFFFFFFFFFFFFFF

@A00155:342:HHGFNDSXY:1:2233:23466:28510 2:N:0:GAACCTAG+TCCGCATA  
CGTAATTATCTTGAAGTCGTGTGGGTCGTGCGAACCTCACACCGCCATCAAGATATATGCCTGACATCC  
CCGGCATCGGGAACCTCAGCCCTAATCGCTTCGCTCACTGCCGCTGATGCGAAGTTTGATGCAGAGTAA  
+  
F:FFFFFFFFFFFFFFFFFFFFFFFFFFFFFFFFFFFFFFFFFFFFFFFFFFFFFFFFFFFFFFFFFFFFFFFFF  
FFFFFFFFFFFFFFFFFFFFFFFFFFFFFFFFFFFFFFFFFFFFFFFFFFFFFFFFFFFFFFFFFFFFFFFFF  
@A00155:342:HHGFNDSXY:1:2233:23511:28025 2:N:0:GAACCTAG+TCCGCATA  
CGTAATTATCTTGAAGTCGTGTGGGTCGTGCGAACCTCACACCGCCATCAAGATATATGCCTGACATCC  
CCGGCATCGGGAACCTCAGCCCTAATCGCTTCGCTCACTGCCGCTGATGCGAAGTTTGATGCAGAGTAA  
+  
:FFFF:FFFFFFFFFFFFFFFFFFFFFFFFFFFFFFFFFFFFFFFFFFFFFFFFFFFFFFFFFFFFFFFFFFFF:FF  
FFFFFFFFFFFFFFFFFFFFFFFFFFFFFFFFFFFFFFFFFFFFFFFFFFFFFFFFFFFFFFFFFFFFFFFFF  
@A00155:342:HHGFNDSXY:1:2153:25138:13651 2:N:0:GAACCTAG+TCCGCATA  
CGTAATTATCTTGAAGTCGTGTGGGTCGTGCGAACCTCACACCGCCATCAAGATATATGCCTGACATCC  
CCGGCATCGGGAACCTCAGCCCTAATCGCTTCGCTCACTGCCGCTGATGCGAAGTTTGATGCAGAGTAA  
+  
FFFFFFFF:FFFFFFFFFFFFFFFFFFFFFFFFFFFFFFFFFFFFFFFFFFFFFFFFFFFFFFFFFFFFFFFFF  
FFFFFFFFFFFFFFFFFFFFFFFFFFFFFFFFFFFFFFFFFFFFFFFFFFFFFFFFFFFFFFFFFFFFFFFFF  
@A00155:342:HHGFNDSXY:1:2457:29188:34945 2:N:0:GAACCTAG+TCCGCATA  
AATTATCTTGAAGTCGTGTGGGTCGTGCGAACCTCACACCGCCATCAAGATATATGCCTGACATCCCCG  
GCATCGGGAACCTCAGCCCTAATCGCTTCGCTCACTGCCGCTGATGCGAAGTTTGATGCAGAGTAAAAA  
+  
FFFFFFFFFFFFFFFFFFFFFFFFFFFFFFFFFFFFFFFFFFFFFFFFFFFFFFFFFFFFFFFFFFFF:F:FFFFFFFF:FFFFF  
FFFFFFFFFFFFFFFFFFFFFFFFFFFFFFFFFFFFFFFFFFFFFFFFFFFFFFFFFFFFFFFFFFFFF:FFFFFFFFFFFFF  
@A00155:342:HHGFNDSXY:1:1217:9742:35837 1:N:0:GAACCTAG+TCCGCATA  
AATTATCTTGAAGTCGTGTGGGTCGTGCGAACCTCACACCGCCATCAAGATATATGCCTGACATCCCCG  
GCATCGGGAACCTCAGCCCTAATCGCTTCGCTCACTGCCGCTGATGCGAAGTTTGATGCAGAGTAAAAA  
+  
FFFFFFFFFFFFFFF:FFFFFFFFFFFFFFFFFFFFFFFFFFFFFFFFFFFFFFFFFFFFFFFFFFFFFFFFF  
FFFFFFFFFFFFFFFFFFFFFFFFFFFFFFFFFFFFFFFFFFFFFFFFFFFFFFFFFFFFFFFFFFFFF:FFFFFFFFFFFFFFF  
@A00155:342:HHGFNDSXY:1:1667:10239:30436 1:N:0:GAACCTAG+TCCGCATA  
AATTATCTTGAAGTCGTGTGGGTCGTGCGAACCTCACACCGCCATCAAGATATATGCCTGACATCCCCG  
GCATCGGGAACCTCAGCCCTAATCGCTTCGCTCACTGCCGCTGATGCGAAGTTTGATGCAGAGTAAAAA  
+  
FFFFFFFFFFFFFFFFFFFFFFFFFFFFFFFFFFFFFFFFFFFF:FFF:FFFFFFFFFFFFFFFFFFFFFFFFF  
FFFFFFFFFFFFFFFFFFFFFFFFFFFFFFFFFFFFFFFFFFFFFFFFFFFFFFFFFFFFFFFFFFFFF:  
@A00155:342:HHGFNDSXY:1:1364:18159:1438 1:N:0:GAACCTAG+TCCGCATA  
AATTATCTTGAAGTCGTGTGGGTCGTGCGAACCTCACACCGCCATCAAGATATATGCCTGACATCCCCG  
GCATCGGGAACCTCAGCCCTAATCGCTTCGCTCACTGCCGCTGATGCGAAGTTTGATGCAGAGTAAAAA  
+  
F,F:FFFFFFFFFFFFFFFFFFFFF,FFFFFFFFFFFFFFFFFFFF:FFFFFFFFFFFFFFFFFFFFFFFFF  
FFFFFFFFFFFFFFFFFFFFF:FFFFFFFFFFFF:FFFFFFFFFFFFFFFFFFFFFFFFFFFFF:FFFFFFFFFFFFF  
@A00155:342:HHGFNDSXY:1:2409:32660:1626 1:N:0:GAACCTAG+TCCGCATA  
AATTATCTTGAAGTCGTGTGGGTCGTGCGAACCTCACACCGCCATCAAGATATATGCCTGACATCCCCG  
GCATCGGGAACCTCAGCCCTAATCGCTTCGCTCACTGCCGCTGATGCGAAGTTTGATGCAGAGTAAAAA  
+  
FFFFFFFFFFFFFFFFFFFFFFFFFFFFF:FFFFFFFFFFFFFFFFFFFFF:FFFFFFFFFFFFFFFFFFFFF  
FFFFFFFFFFFFFFFFFFFFFFFFFFFFFFFFFFFFFFFFFFFFFFFFFFFFFFFFFFFFFFFFFFFFF  
@A00155:342:HHGFNDSXY:1:1557:23014:11256 1:N:0:GAACCTAG+TCCGCATA  
ATTATCTTGAAGTCGTGTGGGTCGTGCGAACCTCACACCGCCATCAAGATATATGCCTGACATCCCCG  
CATCGGGAACCTCAGCCCTAATCGCTTCGCTCACTGCCGCTGATGCGAAGTTTGATGCAGAGTAAAAA  
+  
FFFFFFFFFFFFF:FF:FFFF,FF::F:FFFFFF:FFFFF:FFFFFFFFF:FFFFFFFFF:FFFF,FFF  
FFFF:F:FFFFFF,FFF,FFFFFFFFF:FFFFF,FFF:, ,FFFF:F:FF:FFF:FF,:F:FFFFFFF

@A00155:342:HHGFNDSXY:1:2310:18819:11537 2:N:0:GAACCTAG+TCCGCATA  
CTTGAAGTCGTGTGGGTCGTCAACCTCACACCGCCATCAAGATATATGCCTGACATCCCCGGCATCG  
GGAAGTCAGCCCTAATCGCTTCGCTCACTGCCGCTGATGCGAAGTTTGATGCAGAGTAAAAATC

+

```
FFFFFFFFFFFFFFFFFFFFFFFFFFFFFFFFFFFFFFFFFFFFFFFFFFFFF,FFFFFFFFF:FFFFFFFFFFFF
FFFFFFFFFFFFFFFFF,FFFFFFFFFFFFFFFFFFFFFFFFFFFFFFFFFFFFFFFFFFFFFFFFFFFFFFFFFFFF
```

@A00155:342:HHGFNDSXY:1:1174:7627:1141 2:N:0:GAACCTAG+TCCGCATA  
CTTGAAGTCGTGTGGGTCGTCAACCTCACACCGCCATCAAGATATATGCCTGACATCCCCGGCATCG

+

```
FFFFFFFFFFFFFFFFFFFFFFFFFFFFFFFFFFFFFFFFFFFFFFFFFFFFFFFFFFFFFFFFFFFFFFFFFFFF
FFFFFFFFFFFFFFFF;FFFFFFFFFFFFFFFFFFFFFFFFFFFFFFFFFFFFFFFFFFFFFFFFFFFFFFF
```

@A00155:342:HHGFNDSXY:1:1312:22724:34585 2:N:0:GAACCTAG+TCCGCATA  
CTTGAAGTCGTGTGGGTCGTGCAACCTCACACCGCCATCAAGATATATGCCTGACATCCCCGGCATCG

+

```

FFFFFFFF:FFFF:FFF:FFFFFFFF:FF::F,:FFFF:FFFF:FFFF,FFFFFF:F,FFFFFF
FFFFFF:F:FFFFFF:FF:FFFFFFFFFFFFFF:FFFFFFFFFFFFFF:FFFFFFFFFFFFFF:F

```

@A00155:342:HHGFNDSXY:1:2153:25138:13651 1:N:0:GAACCTAG+TCCGCATA  
CTTGAAGTCGTGTGGGTCGTGCAACCTCACACCGCCATCAAGATATATGCCTGACATCCCCGGCATCG

+

[illegible]

@A00155:342:HHGFNDSXY:1:2562:30680:27164 1:N:0:GAACCTAG+TCCGCATA  
TTGAAGTCGTGTGGGTCGTGCAACCTCACACCGCCATCAAGATATATGCCTGACATCCCCGGCATCGG

GAAGTCAGCCCTAATCGCTTCGCTCACTGCCGCTGATGCGAAGTTTGATGCAGAGTAAAAATCC  
+

F

@A00155:342:HHGFNDSXY:1:1571:13150:29935 2:N:0:GAACCTAG+TCCGCATA  
TGAAGTCGTGTGGGTCGTCAACCTCACACCGCCATCAAGATATATGCCTGACATCCCCGGCATCGGG

AACTCAGCCCTAATCGCTTCGCTCACTGCCGCTGATGCGAAGTTTGATGCAGAGTAAAAATCCCCCTG  
+

■

@A00155:342:HHGFNDSXY:1:1210:27868:33379 1:N:0:GAACCTAG+TCCGCATA  
AAGTCGTGTGGGTCGTCGAACCTCACACCGCCATCAAGATATATGCCTGACATCCCCGGCATCGGGAA

CTCAGCCCTAATCGCTTCGCTCACTGCCGCTGATGCGAAGTTTGATGCAGAGTAAAAATCCCCCTGTG  
+

F

@A00155:342:HHGFND5XY:1:2110:31222:18082 1:N:0:GAACCTAG+TCCGCATA  
AAGTCGTGTGGGTCGTCTGAACCTCACACCGCCATCAAGATATATGCCTGACATCCCCGGGCATCGGGGAA

AAGTCTGTGTGGGTCGTCTGAACCTCTACACCCGCATCAAGATATATGCTTGTACATCCCCCGGCATCTGGGA  
 CTCAGCCCTAATCGCTTCGCTCACTGCCGCTGATGCGAAGTTTGATGCAGAGTAAAAATCCCCCTGTG  
 +

F

@A00155:342:HHGFNDSXY:1:1210:26341:31234 1:N:0:GAACCTAG+TCCGCATA  
AAGTCGTGTGGGTCGTCTGAACCTCACACCGCCATCAAGATATATGCCTGACATCCCCGGGCATCGGGGAA

AAGTCGTGTGGGTCTGTCAAGCTTCAACCCGCCATCAAGATATATGCTTCACTATCCCCGCCATCGGGAA  
 CTCAGCCCTAATCGCTTCGCTCACTGCCGCTGATGCGAAGTTTGATGCAGAGTAAAAATCCCCCTGTG  
 +

FI

```
FFFFFFFFFFFFFFFFFFFFFFFFFFFFF,FF:F:FFFFFF:FFFFFFFFFFFFFFFF:FFFFFFFFFFFFFFFF
```

@A00155:342:HHGFNDSXY:1:1249:31837:4116 2:N:0:GAACCTAG+TCCGCATA  
AGTCGTGTGGGTCGT CGAACCTCACACCGCCATCAAGATATATGCCTGACATCCCCGGCATCGGGAAC  
TCAGCCCTAATCGCTTCGCTCACTGCCGCTGATGCGAAGTTTGATGCAGAGTAAAAATCCCCCTGTGT  
+  
FFFFF,FFFFFFFFFFFFFFFFFFFFFFFFFFFFFFFFFFFFFFFFFFFFFFFFFFFFFFFFFFFFFFFF  
FFFFFFFFF:FFFF:FFFFFFFFFFFFFFFFFFFFFFFFFFFFFFFFFFFFFFFFFFFFFFFFFFFFFFF  
@A00155:342:HHGFNDSXY:1:1246:21468:30029 2:N:0:GAACCTAG+TCCGCATA  
AGTCGTGTGGGTCGT CGAACCTCACACCGCCATCAAGATATATGCCTGACATCCCCGGCATCGGGAAC  
TCAGCCCTAATCGCTTCGCTCACTGCCGCTGATGCGAAGTTTGATGCAGAGTAAAAATCCCCCTGTGT  
+  
FFFFFFFFFFFFFFFFFFFFFFFFFFFFFFFFFFFFFFFFFFFFFFFFFFFFFFFFFFFFFFFF:FFFFFFFFFFFFFFFF  
FFFFFFFFF,FFFFFFFFFFFFFFFFFFFFFFFFFFFFFFFFFFFFFFFFFFFFFFFFFFFFFFFFFFFFFFF  
@A00155:342:HHGFNDSXY:1:1154:7039:26490 2:N:0:GAACCTAG+TCCGCATA  
AGTCGTGTGGGTCGT CGAACCTCACACCGCCATCAAGATATATGCCTGACATCCCCGGCATCGGGAAC  
TCAGCCCTAATCGCTTCGCTCACTGCCGCTGATGCGAAGTTTGATGCAGAGTAAAAATCCCCCTGTGT  
+  
FFFFFFFFFFFFFFFFFFFFFFFFFFFFFFFFFFFFFFFFFFFFFFFFFFFFFFFFFFFFFFFF:FFFFFFFFFFFFFFFF  
FFFFFFFFF,FFFFFFFFFFFFFFFFFFFFFFFFFFFFFFFFFFFFFFFFFFFFFFFFFFFFFFFFFFFFFFF  
@A00155:342:HHGFNDSXY:1:1542:10411:5118 2:N:0:GAACCTAG+TCCGCATA  
TCGTGTGGGTCGT CGAACCTCACACCGCCATCAAGATATATGCCTGACATCCCCGGCATCGGGAAC  
AGCCCTAATCGCTTCGCTCACTGCCGCTGATGCGAAGTTTGATGCAGAGTAAAAATCCCCCTGTGTGG  
+  
FFF:FFFFFFFFFFFFFFFFFFFFFFFFFFFFFFFFFFFFFFFFFFFFFFFFFFFFFFFFFFFFFFF,FFF  
:FFFFFFFFFFFFFFFFFFFFFFFFF,FFFFF:FFF:FFFFFFFFFFFFFFFFFFFFFFF,FFFFFFFFFFFFFFFF  
@A00155:342:HHGFNDSXY:1:1654:20952:23218 1:N:0:GAACCTAG+TCCGCATA  
TCGTGTGGGTCGT CGAACCTCACACCGCCATCAAGATATATGCCTGACATCCCCGGCATCGGGAAC  
AGCCCTAATCGCTTCGCTCACTGCCGCTGATGCGAAGTTTGATGCAGAGTAAAAATCCCCCTGTGTGG  
+  
FFFFFFFFFFFFFFFFFFFFFFFFFFFFFFFFFFFFFFFFFFFFFFFFFFFFFFFFFFFFFFFF:FFFFFFFFFFFFFFFF  
FFFFFFFFF,FFFFFFFFFFFFFFFFFFFFFFFFFFFFFFFFFFFFFFFFFFFFFFFFFFFFFFFFFFFFFFF  
@A00155:342:HHGFNDSXY:1:2245:14850:35540 2:N:0:GAACCTAG+TCCGCATA  
TCGTGTGGGTCGT CGAACCTCACACCGCCATCAAGATATATGCCTGACATCCCCGGCATCGGGAAC  
AGCCCTAATCGCTTCGCTCACTGCCGCTGATGCGAAGTTTGATGCAGAGTAAAAATCCCCCTGTGTGG  
+  
FFFFFFFFFFFFFFFFFFFFFFFFFFFFFFFFFFFFFFFFFFFFFFFFFFFFFFFFFFFFFFFF:FFFFFFFFFFFFFFFF  
FFFFFFFFF,FFFFFFFFFFFFFFFFFFFFFFFFFFFFFFFFFFFFFFFFFFFFFFFFFFFFFFFFFFFFFFF  
@A00155:342:HHGFNDSXY:1:2571:11595:19570 2:N:0:GAACCTAG+TCCGCATA  
TCGTGTGGGTCGT CGAACCTCACACCGCCATCAAGATATATGCCTGACATCCCCGGCATCGGGAAC  
AGCCCTAATCGCTTCGCTCACTGCCGCTGATGCGAAGTTTGATGCAGAGTAAAAATCCCCCTGTGTGG  
+

[illegible]



[illegible]



@A00155:342:HHGFNDSXY:1:2150:13548:32565 1:N:0:GAACCTAG+TCCGCATA  
GCCTGACATCCCCGGCATCGGGAACCTCAGCCCTAATCGCTTCGCTCACTGCCGCTGATGCGAAGTTTG  
ATGCAGAGTAAAAATCCCCCTGTGTGGAGTACAAGTCATGAGGGTCCACTTCGAGCCCCATTCTGTTA  
+  
FFFFFFFFFFFFFFFFFFFFFFFFFFFFFFFFFFFFFFFFFFFFFFFFFFFFFFFFFFFFFFFFFFFFFFFF  
FFFFFFFFFFFFFFFFFFFFFFFFFFFFFFFFFFFFFFFFFFFFFFFFFFFFFFFFFFFFFFFFFFFFFFFF  
@A00155:342:HHGFNDSXY:1:1544:30969:23124 1:N:0:GAACCTAG+TCCGCATA  
GCCTGACATCCCCGGCATCGGGAACCTCAGCCCTAATCGCTTCGCTCACTGCCGCTGATGCGAAGTTTG  
ATGCAGAGTAAAAATCCCCCTGTGTGGAGTACAAGTCATGAGGGTCCACTTCGAGCCCCATTCTGTTA  
+  
FFFFFFFFFFFFFFFFFFFFFFFFFFFFFFFFFFFFFFFFFFFFFFFFFFFFFFFFFFFFFFFFFFFFFFFF:FF  
FFFFFFFFFFFFFFFFFFFFFFFFFFFFFFFFFFFFFFFFFFFFFFFFFFFFFFFFFFFFFFFFFFFFFFFF  
@A00155:342:HHGFNDSXY:1:1234:30626:4805 2:N:0:GAACCTAG+TCCGCATA  
CTGACATCCCCGGCATCGGGAACCTCAGCCCTAATCGCTTCGCTCACTGCCGCTGATGCGAAGTTTGAT  
GCAGAGTAAAAATCCCCCTGTGTGGAGTACAAGTCATGAGGGTCCACTTCGAGCCCCAT  
+  
FFFFFFFFFFFFFFFFFFFFFFFFFFFFFFFFFFFFFFFFFFFFFFFFFFFFFFFFFFFFFFFFFFFFFFFF  
FFFFFFFFFFFFFFFFFFFFFFFFFFFFFFFFFFFFFFFFFFFFFFFFFFFFFFFFFFFFFFFFFFFFFFFF  
@A00155:342:HHGFNDSXY:1:1126:20193:13166 1:N:0:GAACCTAG+TCCGCATA  
CTGACATCCCCGGCATCGGGAACCTCAGCCCTAATCGCTTCGCTCACTGCCGCTGATGCGAAGTTTGAT  
GCAGAGTAAAAATCCCCCTGTGTGGAGTACAAGTCATGAGGGTCCACTTCGAGCCCCATTCTGTTAGA  
+  
FFFFFFFFFFFFFFFFFFFFFFFFFFFFFFFFFFFFFFFFFFFFFFFFFFFFFFFFFFFFFFFFFFFFFFFF  
FFFFFFFF:FFFFFFFFFFFFFFFFFFFFFFFFFFFFFFFFFFFFFFFFFFFFFFFFFFFFFFFFFFFFFFFF  
@A00155:342:HHGFNDSXY:1:2375:16089:19805 1:N:0:GAACCTAG+TCCGCATA  
TGACATCCCCGGCATCGGGAACCTCAGCCCTAATCGCTTCGCTCACTGCCGCTGATGCGAAGTTTGATG  
CAGAGTAAAAATCCCCCTGTGTGGAGTACAAGTCATGAGGGTCCACTTCGAGCCCCATTCTGTTAGAC  
+  
FFFFFFFFFFFFFFFFFFFFFFFFFFFFFFFFFFFFFFFFFFFFFFFFFFFFFFFFFFFFFFFFFFFFFFFF  
FFFFFFFFFFFFFFFFFFFFFFFFFFFFFFFFFFFFFFFFFFFFFFFFFFFFFFFFFFFFFFFFFFFFFFFF  
@A00155:342:HHGFNDSXY:1:2646:14570:28573 1:N:0:GAACCTAG+TCCGCATA  
GACATCCCCGGCATCGGGAACCTCAGCCCTAATCGCTTCGCTCACTGCCGCTGATGCGAAGTTTGATGC  
AGAGTAAAAATCCCCCTGTGTGGAGTACAAGTCATGAGGGTCCACTTCGAGCCCCATTCTGTTAGAC  
+  
FFFFFFFFFFFFFFFFFFFF:FFFFFFFFFFFFFFFFFFFF:FFF:FFFFFFFFFFFF:FFFFFFFFFFFF:FFF  
:FFFFFFFF:FFFFFFFFFFFF::FFF:FFFF,FFFF:FFFFFFFF,FFFFFFFFFFFF,FFFF:F:FFF  
@A00155:342:HHGFNDSXY:1:2174:32154:12649 1:N:0:GAACCTAG+TCCGCATA  
GACATCCCCGGCATCGGGAACCTCAGCCCTAATCGCTTCGCTCACTGCCGCTGATGCGAAGTTTGATGC  
AGAGTAAAAATCCCCCTGTGTGGAGTACAAGTCATGAGGGTCCACTTCGAGCCCCATTCTGTTAGACC  
+  
FFFFFFFFFFFFFFFFFFFFFFFFFFFFFFFFFFFFFFFFFFFFFFFFFFFFFFFFFFFFFFFFFFFF:FFFFFFFFFFFFF  
FFFFFFFFFFFFFFFFFFFFFFFFFFFFFFFFFFFFFFFFFFFFFFFFFFFFFFFFFFFFFFFFFFFFFFFF:  
@A00155:342:HHGFNDSXY:1:1542:10411:5118 1:N:0:GAACCTAG+TCCGCATA  
ACATCCCCGGCATCGGGAACCTCAGCCCTAATCGCTTCGCTCACTGCCGCTGATGCGAAGTTTGATGCA  
GAGTAAAAATCCCCCTGTGTGGAGTACAAGTCATGAGGGTCCACTTCGAGCCCCATTCTGTTAGACCT  
+  
FFFFFFFFFFFF:FFFFFFFFFFFFFFFFFFFF:FFFFFFFFFFFF:FFFFFFFFFFFF:FFFFFFFF  
FF::FFFFFFFFFFFFFFFFFFFFFFFFFFFFFFFFFFFFFFFFFFFFFFFFFFFFFFFFFFFFFFFF:FFFFFFFF  
@A00155:342:HHGFNDSXY:1:2409:32660:1626 2:N:0:GAACCTAG+TCCGCATA  
CATCCCCGGCATCGGGAACCTCAGCCCTAATCGCTTCGCTCACTGCCGCTGATGCGAAGTTTGATGCAG  
AGTAAAAATCCCCCTGTGTGGAGTACAAGTCATGAGGGTCCACTTCGAGCCCCATTCTGTTAGACCT  
+  
FF:FF:FF,FFFFFFFF:FFFFFFFFFFFFFFFFFFFF:FFF:FFFF:FF:FFFFFFFFFFFFFFFFFFFF  
FFFFFFFF:FFF,FFFFFFFF:FFFFFFFFFFFF:FFFFFFFFFFFFFFFFFFFFFFFFFFFFFFFF:FFF:F

[illegible]

```

@A00155:342:HHGFNDSXY:1:1364:18159:1438 2:N:0:GAACCTAG+TCCGCATA
ATCCCCGGCATCGGGAACCTCAGCCCTAATCGCTTCGCTCACTGCCGCTGATGCGAAGTTTGATGCAGA
GTAAAAATCCCCCTGTGTGGAGTACAAGTCATGAGGGTCCACTTCGAGCCCCATTCTGTTAGACCTTA
+
FFFFFFFFFFFFFFFFFFFFFFFFFFFFFFFF:FFFF:FFFFFFFFFFFFFFFFFFFFFFFF:FFFF:FFFFFFFF
FFFFFFFFFFFFFFFFFFFFFFFFFFFFFFFFFFFFFFFFFFFFFFFFFFFFFFFFFFFFFFFFFFFFFFFF:FFFFFFFF:FFFFFF:F
@A00155:342:HHGFNDSXY:1:2174:32154:12649 2:N:0:GAACCTAG+TCCGCATA
TCCCCGGCATCGGGAACCTCAGCCCTAATCGCTTCGCTCACTGCCGCTGATGCGAAGTTTGATGCAGAG
TAAAAATCCCCCTGTGTGGAGTACAAGTCATGAGGGTCCACTTCGAGCCCCATTCTGTTAGACCTTA
+
FFFFFFFFFFFFFFFFFFFFFFFFFFFFFFFF:FF:FFFFFFFFFFFFFFFFFFFFFFFFFFFFFFFFFFFFFFFF
FFFFFFFFFFFFFFFFFFFFFFFFFFFFFFFFFFFFFFFFFFFFFFFFFFFFFFFFFFFFFFFFFFFFFFFFFFFF:, :F
@A00155:342:HHGFNDSXY:1:1110:24261:28698 1:N:0:GAACCTAG+TCCGCATA
CCGGCATCGGGAACCTCAGCCCTAATCGCTTCGCTCACTGCCGCTGATGCGAAGTTTGATGCAGAGTAA
AAATCCCCCTGTGTGGAGTACAAGTCATGAGGGTCCACTTCGAGCCCCATTCTGTTAGA
+
FFFFFFFFFFFFFFFFFFFFFFFFFFFFFFFF:FFFFFFFFFFFFFFFFFFFFFFFFFFFFFFFFFFFFFFFF
FFFFFFFFFFFFFFFFFFFFFFFFFFFFFFFFFFFFFFFFFFFFFFFFFFFFFFFFFFFFFFFFFFFFFFFFFFFF
@A00155:342:HHGFNDSXY:1:2154:5665:31501 2:N:0:GAACCTAG+TCCGCATA
CCGGCATCGGGAACCTCAGCCCTAATCGCTTCGCTCACTGCCGCTGATGCGAAGTTTGATGCAGAGTAA
AAATCCCCCTGTGTGGAGTACAAGTCATGAGGGTCCACTTCGAGCCCCATTCTGTTAGACCTT
+
FFFFFFFFFFFFFFFFFFFFFFFFFFFFFFFF:FFFFFFFFFF,FFFFFFFFFFFFFFFFFFFFFFFFFFFFFFFF
FFFFFFFF:FFFFF:FFFFF:FFFFFFFFFFFFFFFFFFFFFFFFFFFFFFFFFFFFFFFF:FFFFFFFFFFFF
@A00155:342:HHGFNDSXY:1:2549:23511:23829 2:N:0:GAACCTAG+TCCGCATA
CTGGCATCGGGAACCTCAGCCCTAATCGCTTCGCTCACTGCCGCTGATGCGAAGTTTGATGCAGAGTAA
AAATCCCCCTGTGTGGAGTACAAGTCATGAGGGTCCACTTCGAGCCCCATTCTGTTAGACCTTA
+
FFFFFFFFFFFFFFFFFFFFFFFFFFFFFFFFFFFFFFFFFFFFFFFFFFFFFFFFFFFFFFFF:FFFF:FFFFFFFF
FFFFFFFFFFFFFFFFFFFFFFFFFFFFFFFFFFFFFFFFFFFFFFFFFFFFFFFFFFFFFFFFFFFFFFFFFFFF
@A00155:342:HHGFNDSXY:1:1332:31241:26287 2:N:0:GAACCTAG+TCCGCATA
GGCATCGGGAACCTCAGCCCTAATCGCTTCGCTCACTGCCGCTGATGCGAAGTTTGATGCAGAGTAAAA
ATCCCCCTGTGTGGAGTACAAGTCATGAGGGTCCACTTCGAGCCCCATTCTGTTAGACCTTACCGCAC
+
FFFFF,FFFFFFFFFFFFFFFFFFFFFFFFFFFFFFFFFFFFFFFFFFFFFFFFFFFFFFFFFFFFFFFF
FFFFFFFFFFFFFFFFFFFFFFFFFFFFFFFFFFFFFFFFFFFFFFFFFFFFFFFFFFFFFFFFFFFFFFFFFFFF
@A00155:342:HHGFNDSXY:1:1621:29360:36307 1:N:0:GAACCTAG+TCCGCATA
GCATCGGGAACCTCAGCCCTAATCGCTTCGCTCACTGCCGCTGATGCGAAGTTTGATGCAGAGTAAAAA
TCCCCCTGTGTGGAGTACAAGTCATGAGGGTCCACTTCGAGCCCCATTCTGTTAGACCTTACCGCACA
+
FFFFFFFFFFFFFFFFFFFFFFFFFFFFFFFFFFFFFFFFFFFFFFFFFFFFFFFFFFFFFFFF:FFFFFFFF
FFFFFFFFFFFFFFFFFFFFFFFFFFFFFFFFFFFFFFFF:FFFFFFFFFFFFFFFFFFFFFFFFFFFFFFFF
@A00155:342:HHGFNDSXY:1:1621:29541:36119 1:N:0:GAACCTAG+TCCGCATA
GCATCGGGAACCTCAGCCCTAATCGCTTCGCTCACTGCCGCTGATGCGAAGTTTGATGCAGAGTAAAAA
TCCCCCTGTGTGGAGTACAAGTCATGAGGGTCCACTTCGAGCCCCATTCTGTTAGACCTTACCGCACA
+
FFFFFFFFFFFFFFFFFFFFFFFFFFFFFFFFFFFFFFFFFFFFFFFFFFFFFFFFFFFFFFFF:FFFFFFFF
FFFFFFFFFFFFFFFFFFFFFFFFFFFFFFFFFFFFFFFF:FFFFFFFFFFFFFFFFFFFFFFFFFFFFFFFF
@A00155:342:HHGFNDSXY:1:1126:20193:13166 2:N:0:GAACCTAG+TCCGCATA
CATCGGGAACCTCAGCCCTAATCGCTTCGCTCACTGCCGCTGATGCGAAGTTTGATGCAGAGTAAAAAT
CCCCCTGTGTGGAGTACAAGTCATGAGGGTCCACTTCGAGCCCCATTCTGTTAGACCTTACCGC
+
FFFFFFFFFFFFFFFFFFFFFFFF, ,FFFFFFFFFFFFFFFF:FFFFFFFFFFFFFFFFFFFFFFFF
FFFFFFFFFFFFFFFF:FFFFFFFFFFFFFFFF:FFFFFFFFFFFFFFFF,FFFFFFFFFFFFFFFF

```

@A00155:342:HHGFNDSXY:1:2562:30680:27164 2:N:0:GAACCTAG+TCCGCATA  
CATCGGGAAGCTCAGCCCTAATCGCTTCGCTCACTGCCGCTGATGCGAAGTTTGATGCAGAGTAAAAAT  
CCCCCTGTGTGGAGTACAAGTCATGAGGGTCCACTTCGAGCCCCATTCTGTTAGACCTTACCGC

[illegible]

+

```
FFFFFFFFFFFFFFFFFFFFFFFFFFFFFFFFFFFFFFFFFFFFF:FFFFFF:FFFFFFF:FFFFFFFFFF:FFFFFFF
FFFFFFFFFFFFFFFFFFFFFFFFFFFFFFFFFFFFFFFFFFFFF:FFFFFFFFFFFFFFFFFFFFFFFFFFFFFFFFFFFFF:FFFFFFF
```

+

[illegible]

+

```

:FF:FFFFFF:FFFFFFFFFFFFFF:FFFFFFFFFFFF:F:FFFFF,FFF:FF::FFFFF,FFFF:FFFF:
FF,FFFF,FFFFFFFF:FFF,FFF:FFF,FFF:FF,FF:FFFF:FFF:F:FFFF:FFFF:FFFFFFFF:

```

+

[illegible]

+

[illegible]

+

```
FFFFFFFFFFFFFFFF,FFFFFFFFFFFFFFFFFFFFFFFFFFFFFFFFFFFFFFFFFFFFFFFFFFFFFFFFFFFFF
FFFFFFFFFFFFFFFFFFFFFFFFFFFFFF:FFFFFF:FFFFFFFFFFFFFFFF:FFFFFFFFFFFFFFFFFFFFFFFF
```

+

[illegible]

+

[illegible]



@A00155:342:HHGFNDSXY:1:1123:5936:16501 1:N:0:GAACCTAG+TCCGCATA  
CAGCCCTAATCGCTTCGCTCACTGCCGCTGATGCGAAGTTTGATGCAGAGTAAAAATCCCCCTGTGTG  
GAGTACAAGTCATGAGGGTCCACTTCGAGCCCCATTCTGTTAGACCTTACCGCACAACTGTCTGGAA  
+  
FFFFFFFFFFFFFFFFFFFFFFFFFFFFFFFFFFFFFFFFFFFFFFFFFFFFFFFFFFFFFFFFFFFFFFFFFFFFF:  
FFFFFFFFFFFFFFFFFFFFFFFFFFFFFFFFFFFFFFFFFFFFFFFFFFFFFFFFFFFFFFFFFFFFFFFFFFFFFFF  
@A00155:342:HHGFNDSXY:1:1328:16486:4398 2:N:0:GAACCTAG+TCCGCATA  
CAGCCCTAATCGCTTCGCTCACTGCCGCTGATGCGAAGTTTGATGCAGAGTAAAAATCCCCCTGTGTG  
GAGTACAAGTCATGAGGGTCCACTTCGAGCCCCATTCTGTTAGACCTTACCGCACAACTGTCTGGAA  
+  
FFFFFFFFFFFFFFFFFFFFFFFFFFFFFFFFFFFFFFFFFFFFFFFFFFFFFFFFFFFFFFFFFFFFFFFFFFFFF  
FFFFFFFFFFFFFFFFFFFFFFFFFFFFFFFFFFFFFFFFFFFFFFFFFFFFFFFFFFFFFFFFFFFFFFFFFFFFFFF  
@A00155:342:HHGFNDSXY:1:2127:7943:1877 2:N:0:GAACCTAG+TCCGCATA  
CTAATCGCTTCGCTCACTGCCGCTGATGCGAAGTTTGATGCAGAGTAAAAATCCCCCTGTGTGGAGTA  
CAAGTCATGAGGGTCCACTTCGAGCCCCATTCTGTTAGACCTTACCGCACAACTGTCTGGAAACACT  
+  
FFFFFFFFFFFFFFFFFFFFFFFFFFFFFFFFFFFFFFFFFFFFFFFFFFFFFFFFFFFFFFFFFFFFFFFFFFFFF  
FF:FFFFFFFFFFFFFFFFFFFFFFFFFFFFFFFFFFFFFFFFFFFFFFFFFFFFFFFFFFFFFFFFFFFFFFFFFFFFF  
@A00155:342:HHGFNDSXY:1:2126:8540:37043 2:N:0:GAACCTAG+TCCGCATA  
CTAATCGCTTCGCTCACTGCCGCTGATGCGAAGTTTGATGCAGAGTAAAAATCCCCCTGTGTGGAGTA  
CAAGTCATGAGGGTCCACTTCGAGCCCCATTCTGTTAGACCTTACCGCACAACTGTCTGGAAACACT  
+  
FFFFFFFFFFFFFFFFFFFFFFFFFFFFFFFFFFFFFFFFFFFFFFFFFFFFFFFFFFFFFFFFFFFFFFFFFFFFF  
FFFFFFFFFFFFFFFFFFFFFFFFFFFFFFFFFFFFFFFFFFFFFFFFFFFFFFFFFFFFFFFFFFFFFFFFFFFFFFF  
@A00155:342:HHGFNDSXY:1:2127:7771:1861 2:N:0:GAACCTAG+TCCGCATA  
CTAATCGCTTCGCTCACTGCCGCTGATGCGAAGTTTGATGCAGAGTAAAAATCCCCCTGTGTGGAGTA  
CAAGTCATGAGGGTCCACTTCGAGCCCCATTCTGTTAGACCTTACCGCACAACTGTCTGGAAACACT  
+  
FF:, :FFFFFFFFFFFFFFFFFFFFFFFFFFFFFFFFFFFFFFFFFFFFFFFFFFFFFFFFFFFFFFFFFFFFF:  
FFFFFFFFFFFFFFFFFFFFFFFFFFFFFFFFFFFFFFFFFFFFFFFFFFFFFFFFFFFFFFFFFFFFFFFFFFFFFFF  
@A00155:342:HHGFNDSXY:1:2435:28736:28275 1:N:0:GAACCTAG+TCCGCATA  
AATCGCTTCGCTCACTGCCGCTGATGCGAAGTTTGATGCAGAGTAAAAATCCCCCTGTGTGGAGTACA  
AGTCATGAGGGTCCACTTCGAGCCCCATTCTGTTAGACCTTACCGCACAACTGTCTGGAAACACTGC  
+  
FFFFFFFFFFFFFFFFFFFFFFFFFFFFFFFFFFFFFFFFFFFFFFFFFFFFFFFFFFFFFFFFFFFFFFFFFFFFF  
FFF:FFFFFFFFFFFFFFFFFFFFFFFFFFFFFFFFFFFFFFFFFFFFFFFFFFFFFFFFFFFFFFFFFFFFFFFFFFFFF  
@A00155:342:HHGFNDSXY:1:1667:10239:30436 2:N:0:GAACCTAG+TCCGCATA  
ATCGCTTCGCTCACTGCCGCTGATGCGAAGTTTGATGCAGAGTAAAAATCCCCCTGTGTGGAGTACAA  
GTCATGAGGGTCCACTTCGAGCCCCATTCTGTTAGACCTTACCGCACAACTGTCTGGAAACACTGCG  
+  
FFFFFFFFFFFFFFFFFFFFFFFFFFFFFFFFFFFFFFFFFFFFFFFFFFFFFFFFFFFFFFFFFFFFFFFFFFFFF  
FFFFFFFFFFFFFFFFFFFFFFFFFFFFFFFFFFFFFFFFFFFFFFFFFFFFFFFFFFFFFFFFFFFFFFFFFFFFFFF  
@A00155:342:HHGFNDSXY:1:1328:16486:4398 1:N:0:GAACCTAG+TCCGCATA  
TTCGCTCACTGCCGCTGATGCGAAGTTTGATGCAGAGTAAAAATCCCCCTGTGTGGAGTACAAGTCATG  
AGGGTCCACTTCGAGCCCCATTCTGTTAGACCTTACCGCACAACTGTCTGGAAACACTGCGCTATCA  
+  
FFFFFFFFFFFFFFFFFFFFFFFFFFFFFFFFFFFFFFFFFFFFFFFFFFFFFFFFFFFFFFFFFFFFFFFFFFFFF  
FFFFFFFFFFFFFFFFFFFFFFFFFFFFFFFFFFFFFFFFFFFFFFFFFFFFFFFFFFFFFFFFFFFFFFFFFFFFFFF  
@A00155:342:HHGFNDSXY:1:2551:5873:15765 2:N:0:GAACCTAG+TCCGCATA  
TCGCTCACTGCCGCTGATGCGAAGTTTGATGCAGAGTAAAAATCCCCCTGTGTGGAGTACAAGTCATG  
AGGGTCCACTTCGAGCCCCATTCTGTTAGACCTTACCGCACAACTGTCTGGAAACACTGCGCTATCA  
+



[illegible]

[illegible]

@A00155:342:HHGFNDSXY:1:1433:9824:5854 1:N:0:GAACCTAG+TCCGCATA  
GCTGATGCGAAGTTTGATGCAGAGTAAAAATCCCCCTGTGTGGAGTACAAGTCATGAGGGTCCACTTC  
GAGCCCCATTCTGTTAGACCTTACCGCACAACTGTCTGGAAACACTGCGCTATCAGTAGGCATATTA  
+  
FF:FFFFFFFFFFFFFFFFFFFFFFFFFFFFFFFFFFFFFFFFFFFFFFFFFFFFFFFFFFFFFFFFFFFFFFFF  
FFFFFFFFFFFFFFFFFFFFFFFFFFFFFFFFFFFFFFFFFFFFFFFFFFFFFFFFFFFFFFFFFFFFFFFFFFFF  
@A00155:342:HHGFNDSXY:1:2123:32723:28103 1:N:0:GAACCTAG+TCCGCATA  
GCTGATGCGAAGTTTGATGCAGAGTAAAAATCCCCCTGTGTGGAGTACAAGTCATGAGGGTCCACTTC  
GAGCCCCATTCTGTTAGACCTTACCGCACAACTGTCTGGAAACACTGCGCTATCAGTAGGCATATTA  
+  
FFFFFFFFFFFFFFFFFFFFFFFFFFFFFFFFFFFFFFFFFFFFFFFFFFFFFFFFFFFFFFFFFFFFFFFFFFFF  
FFFFFFFFFFFFFFFFFFFFFFFFFFFFFFFFFFFFFFFFFFFFFFFFFFFFFFFFFFFFFFFFFFFFFFFFFFFF  
@A00155:342:HHGFNDSXY:1:1673:14262:24659 1:N:0:GAACCTAG+TCCGCATA  
GCTGATGCGAAGTTTGATGCAGAGTAAAAATCCCCCTGTGTGGAGTACAAGTCATGAGGGTCCACTTC  
GAGCCCCATTCTGTTAGACCTTACCGCACAACTGTCTGGAAACACTGCGCTATCAGTAGGCATATTA  
+  
FFFFFFFFFFFFFFFFFFFFFFFFFFFFFFFFFFFFFFFFFFFFFFFFFFFFFFFFFFFFFFFFFFFFFFFFFFFF  
FFFFFFFFFFFFFFFFFFFFFFFFFFFFFFFFFFFFFFFFFFFFFFFFFFFFFFFFFFFFFFFFFFFFFFFFFFFF  
@A00155:342:HHGFNDSXY:1:2551:25048:19194 1:N:0:GAACCTAG+TCCGCATA  
GCTGATGCGAAGTTTGATGCAGAGTAAAAATCCCCCTGTGTGGAGTACAAGTCATGAGGGTCCACTTC  
GAGCCCCATTCTGTTAGACCTTACCGCACAACTGTCTGGAAACACTGCGCTATCAGTAGGCATATTA  
+  
FFFFFFFFFFFFFFFFFFFFFFFFFFFFFFFFFFFFFFFFFFFFFFFFFFFFFFFFFFFFFFFFFFFFFFFFFFFF  
FFFFFFFFFFFFFFFFFFFFFFFFFFFFFFFFFFFFFFFFFFFFFFFFFFFFFFFFFFFFFFFFFFFFFFFFFFFF  
@A00155:342:HHGFNDSXY:1:2637:11939:23985 1:N:0:GAACCTAG+TCCGCATA  
CTGATGCGAAGTTTGATGCAGAGTAAAAATCCCCCTGTGTGGAGTACAAGTCATGAGGGTCCACTTCG  
AGCCCCATTCTGTTAGACCTTACCGCACAACTGTCTGGAAACACTGCGCTATCAGTAGGCATATTA  
+  
FFFFFFFFFFFFFFFFFFFFFFFFFFFFFFFFFFFFFFFFFFFFFFFFFFFFFFFFFFFFFFFFFFFFFFFFFFFF  
FFFFFFFFFFFFFFFFFFFFFFFFFFFFFFFFFFFFFFFFFFFFFFFFFFFFFFFFFFFFFFFFFFFFFFFFFFFF  
@A00155:342:HHGFNDSXY:1:2610:4833:24392 1:N:0:GAACCTAG+TCCGCATA  
CTGATGCGAAGTTTGATGCAGAGTAAAAATCCCCCTGTGTGGAGTACAAGTCATGAGGGTCCACTTCG  
AGCCCCATTCTGTTAGACCTTACCGCACAACTGTCTGGAAACCTGCGCTATCAGTAGGCATATTA  
+  
FFFFFFF,FFFFFFF,FFFFF:FFFFFFFFFFFFF:FFFFFFF:FFFFFF:F:FF:FF:FFFFFF:FF:  
FFFFFFF,:FFFF:F:FFF:FFFFFFFFFFFFF:FFFFF:F,FFFFF:,FFFFFFFFF:,FF,FFFF  
@A00155:342:HHGFNDSXY:1:2401:14389:19680 1:N:0:GAACCTAG+TCCGCATA  
CTGATGCGAAGTTTGATGCAGAGTAAAAATCCCCCTGTGTGGAGTACAAGTCATGAGGGTCCACTTCG  
AGCCCCATTCTGTTAGACCTTACCGCACAACTGTCTGGAAACACTGCGCTATCAGTAGGCATATTAA  
+  
FFFFFFFFFFFFFFFFFFFFFFFFFFFFFFFFFFFFFFFFFFFFFFFFFFFFFFFFFFFFFFFFFFFFFFFFFFFF  
FFFFFFFFFFFFFFFFFFFFFFFFFFFFFFFFFFFFFFFFFFFFFFFFFFFFFFFFFFFFFFFFFFFFFFFFFFFF  
@A00155:342:HHGFNDSXY:1:2653:2184:29450 1:N:0:GAACCTAG+TCCGCATA  
CTGATGCGAAGTTTGATGCAGAGTAAAAATCCCCCTGTGTGGAGTACAAGTCATGAGGGTCCACTTCG  
AGCCCCATTCTGTTAGACCTTACCGCACAACTGTCTGGAAACACTGCGCTATCAGTAGGCATATTAA  
+  
FFFFFFFFFFFFFFFFFFFFFFFFFFFFFFFFFFFFFFFFFFFFFFFFFFFFFFFFFFFFFFFFFFFFFFFFFFFF  
FFFFFFFFFFFFFFFFFFFFFFFFFFFFFFFFFFFFFFFFFFFFFFFFFFFFFFFFFFFFFFFFFFFFFFFFFFFF  
@A00155:342:HHGFNDSXY:1:1307:20609:22905 1:N:0:GAACCTAG+TCCGCATA  
CTGATGCGAAGTTTGATGCAGAGTAAAAATCCCCCTGTGTGGAGTACAAGTCATGAGGGTCCACTTCG  
AGCCCCATTCTGTTAGACCTTACCGCACAACTGTCTGGAAACACTGCGCTATCAGTAGGCATATTAA  
+  
FFFFFFFFFFFFF:FF,FF,FFFFFF:FFFFFF,FFFF:FFFFFFFFFFFFFFFFF::F:FFFFFFFFFFFF:FF  
FFFFFFFF,FFF:,FFF:FFF:FFFFFFFFFFFFF,FF,:F:FFFF:FFFFF,F:,F:FF,F,,F::FF

@A00155:342:HHGFNDSXY:1:2471:28836:36401 1:N:0:GAACCTAG+TCCGCATA  
TGATGCGAAGTTTGATGCAGAGTAAAAATCCCCCTGTGTGGAGTACAAGTCATGAGGGTCCACTTCGA  
GCCCCATTCTGTTAGACCTTACCGCACAACTGTCTGGAAACACTGCGCTATCAGTAGGCATATTAAG  
+  
FFFFFFFFFFFFFFFFFFFFFFFFFFFFFFFFFFFFFFFFFFFFFFFFFFFFFFFFFFFFFFFFFFFFFFFF  
FFFFFFFFFFFFFF:FFFFFFFFFFFFFFFFFFFFFFFFFFFFFFFFFFFFFFFFFFFFFFFFFFFFFFFFF:  
@A00155:342:HHGFNDSXY:1:1655:13865:14262 1:N:0:GAACCTAG+TCCGCATA  
ATGCGAAGTTTGATGCAGAGTAAAAATCCCCCTGTGTGGAGTACAAGTCATGAGGGTCCACTTCGAGC  
CCCATTCTGTTAGACCTTACCGCACAACTGTCTGGAAACACTGCGCTATCAGTAGGCATATTAAGTT  
+  
FFFFFFFFFFFFFFFFFFFFFFFFFFFFFFFFFFFFFFFFFFFFFFFFFFFFFFFFFFFFFFFFFFFFFFFF  
FFFFFFFFFFFFFFFFFFFFFFFFFFFFFFFFFFFFFFFFFFFFFFFFFFFFFFFFFFFFFFFFFFFFFFFF  
@A00155:342:HHGFNDSXY:1:2245:22562:29731 1:N:0:GAACCTAG+TCCGCATA  
TGCGAAGTTTGATGCAGAGTAAAAATCCCCCTGTGTGGAGTACAAGTCATGAGGGTCCACTTCGAGCC  
CCATTCTGTTAGACCTTACCGCACAACTGTCTGGAAACACTGCGCTATCAGTAGGCATATTAAGTTT  
+  
FFFFFFFFFFFFFFFFFFFFFFFFFFFFFFFFFFFFFFFFFFFFFFFFFFFFFFFFFFFFFFFFFFFFFFFF  
FFFFFFFFFFFFFFFFFFFFFFFFFFFFFFFFFFFFFFFFFFFFFFFFFFFFFFFFFFFFFFFFFFFFFFFF  
@A00155:342:HHGFNDSXY:1:2454:23656:29496 2:N:0:GAACCTAG+TCCGCATA  
CGAAGTTTGATGCAGAGTAAAAATCCCCCTGTGTGGAGTACAAGTCATGAGGGTCCACTTCGAGCCCC  
ATTCTGTTAGACCTTACCGCACAACTGTCTGGAAACACTGCGCTATCAGTAGGCATATTAAGTTTAC  
+  
F:FFFFFFFFFFFFFFFFFFFFFFFFFFFFFFFFFFFFFFFFFFFFFFFFFFFFFFFFFFFFFFFFFFFF  
FFFFFFFFFFFFFFFFFFFFFFFFFFFFFFFFFFFFFFFFFFFFFFFFFFFFFFFFFFFFFFFFFFFFFFFF  
@A00155:342:HHGFNDSXY:1:1621:29360:36307 2:N:0:GAACCTAG+TCCGCATA  
GTTTGATGCAGAGTAAAAATCCCCCTGTGTGGAGTACAAGTCATGAGGGTCCACTTCGAGCCCCATT  
TGTTAGACCTTACCGCACAACTGTCTGGAAACACTGCGCTATCAGTAGGCATATTAAGTTTACTTTC  
+  
FFFFFFFFFFFFFFFFFFFFFFFF:FFFFFFFFFFFFFFFFFFFFFFFFFFFFFFFFFFFFFFFFFFFFF  
FFFFFFFFFFFFFFFFFFFFFFFFFFFFFFFFFFFFFFFFFFFFFFFFFFFFFFFFFFFFFFFFFFFFFFFF  
@A00155:342:HHGFNDSXY:1:1621:29541:36119 2:N:0:GAACCTAG+TCCGCATA  
GTTTGATGCAGAGTAAAAATCCCCCTGTGTGGAGTACAAGTCATGAGGGTCCACTTCGAGCCCCATT  
TGTTAGACCTTACCGCACAACTGTCTGGAAACACTGCGCTATCAGTAGGCATATTAAGTTTACTTTC  
+  
FFFFFFFFFFFFFFFFFFFFFFFF:FFFFFFFFFFFFFF:FF:FFFFFFFFFFFFFFFFFFFFFFFF  
FFFFFFFFFFFFFFFFFFFFFFFFFFFFFFFFFFFFFFFFFFFFFFFFFFFFFFFFFFFFFFFFFFFF,FFFFFFFFFFFFFFFFFFFFFFFFFFFFFFFF,  
@A00155:342:HHGFNDSXY:1:2327:7048:18082 1:N:0:GAACCTAG+TCCGCATA  
TTTGATGCAGAGTAAAAATCCCCCTGTGTGGAGTACAAGTCATGAGGGTCCACTTCGAGCCCCATTCT  
GTTAGACCTTACCGCACAACTGTCTGGAAACACTGCGCTATCAGTAGGCATATTAAGTTTACTTTCT  
+  
FFFFFFFFFFFFFFFFFFFFFFFFFFFFFFFFFFFFFFFFFFFFFFFFFFFFFFFFFFFFFFFFFFFFFFFF  
FFFFFFFFFFFFFFFFFFFFFFFFFFFFFFFFFFFFFFFF:FFFFFFFFFFFFFFFFFFFFFFFFFFFFFFFF  
@A00155:342:HHGFNDSXY:1:2132:3269:18396 1:N:0:GAACCTAG+TCCGCATA  
TTTGATGCAGAGTAAAAATCCCCCTGTGTGGAGTACAAGTCATGAGGGTCCACTTCGAGCCCCATTCT  
GTTAGACCTTACCGCACAACTGTCTGGAAACACTGCGCTATCAGTAGGCATATTAAGTTTACTTTCT  
+  
FFFFFFFFFFFFFFFFFFFFFFFF,FF:FFFFFFFFFFFFFFFFFFFFFFFFFFFFFFFF,FFFFFFFFFFFFFFFFFFFFFFFF  
FFFF:FFFFFFFF:FFFFFFFFFFFFFFFFFFFFFFFFFFFFFFFFFFFFFFFFFFFFFFFF:FFFFFFFF:FF  
@A00155:342:HHGFNDSXY:1:2631:27100:27884 2:N:0:GAACCTAG+TCCGCATA  
TTGATGCAGAGTAAAAATCCCCCTGTGTGGAGTACAAGTCATGAGGGTCCACTTCGAGCCCCATTCTG  
TTAGACCTTACCGCACAACTGTCTGGAAACACTGCGCTATCAGTAGGCATATTAAGTTTACTTTCTC  
+  
FFFFFFFFFFFFFF:FFF,FFFFFFFFFFFFFFFFFFFFFFFFFFFFFFFFFFFFFFFFFFFFFFFF:FF  
FFFFFFFFFFFFFFFFFFFFFFFF:FFFFFFFFFFFFFFFFFFFFFFFFFFFFFFFF:FFFFFFFFFFFFFF:FFFF

[illegible]

@A00155:342:HHGFNDSXY:1:2630:22028:15029 2:N:0:GAACCTAG+TCCGCATA  
GCAGAGTAAAAATCCCCCTGTGTGGAGTACAAGTCATGAGGGTCCACTTCGAGCCCCATTCTGTTAGA  
CCTTACCGCACAACTGTCTGGAAACACTGCGCTATCAGTAGGCATATTAAGTTTACTTTCTCCAATC  
+  
FFFFFFFFFFFFFFFFFFFFFFFFFFFFFFFFFFFFFFFFFFFFFFFFFFFFFFFFFFFFFFFFFFFFFFFF  
FFFFFFFFFFFFFFFFFFFFFFFFFFFFFFFFFFFFFFFFFFFFFFFFFFFFFFFFFFFFFFFFFFFFFFFF  
@A00155:342:HHGFNDSXY:1:1571:22435:15546 2:N:0:GAACCTAG+TCCGCATA  
GCAGAGTAAAAATCCCCCTGTGTGGAGTACAAGTCATGAGGGTCCACTTCGAGCCCCATTCTGTTAGA  
CCTTACCGCACAACTGTCTGGAAACACTGCGCTATCAGTAGGCATATTAAGTTTACTTTCTCCAATC  
+  
FFFFFFF:FFFF,FFF:FFFFFF:FFFFFFFFFFFFFFFFFFFF,FFFFFFFFF:FFFFFFFFFFFFFFFF  
FFF:FFFFFFFFFFFFFFFFFFFFFFFFFFFFFFFFFFFFFFFFFFFFFFFFFFFFFFFFFFFFFFFFFFFF:FF  
@A00155:342:HHGFNDSXY:1:2508:8947:4617 2:N:0:GAACCTAG+TCCGCATA  
GCAGAGTAAAAATCCCCCTGTGTGGAGTACAAGTCATGAGGGTCCACTTCGAGCCCCATTCTGTTAGA  
CCTTACCGCACAACTGTCTGGAAACACTGCGCTATCAGTAGGCATATTAAGTTTACTTTCTCCAATC  
+  
FFFFFFFFFFFFFFF:FFFFFFFFFFFFFFFFFFFF:FFFFFFFFFFFFFFFFFFFFFFFFFFFFFFFF,FFFFFFFF  
FFFFFFFFFFFFFFFFFFFFFFFFFFFFFFFFFFFFFFFFFFFFFFFFFFFFFFFFFFFFFFFFFFFFFFFF:FFFFFFF  
@A00155:342:HHGFNDSXY:1:2653:2184:29450 2:N:0:GAACCTAG+TCCGCATA  
CAGAGTAAAAATCCCCCTGTGTGGAGTACAAGTCATGAGGGTCCACTTCGAGCCCCATTCTGTTAGAC  
CTTACCGCACAACTGTCTGGAAACACTGCGCTATCAGTAGGCATATTAAGTTTACTTTCTCCAATC  
+  
FFFFFFFFFFFFFFFFFFFFFFFFFFFF:FFFFFFFFFFFFFFFFFFFF:FF:FFFFFFFFF:FFFFFFFFFFFFFFF  
FFFFFFF:FFFFFFFFFFFFFFF:FFFFFFFFFFFF,FFFFFFFFFFFFFFFFFFFFFFFFFFFFFFFFFFFFFFF  
@A00155:342:HHGFNDSXY:1:2132:3269:18396 2:N:0:GAACCTAG+TCCGCATA  
CAGAGTAAAAATCCCCCTGTGTGGAGTACAAGTCATGAGGGTCCACTTCGAGCCCCATTCTGTTAGAC  
CTTACCGCACAACTGTCTGGAAACACTGCGCTATCAGTAGGCATATTAAGTTTACTTTCTCCAATC  
+  
FFFFFFFFFFFFFFFFFFFF:FFFFFFFFFFFFFFFFFFFF:FFFFFFFFFFFFFFFFFFFF:FFF:FFFFFFFFFFFFFFF  
FFFFF:F:FFFF,FFFFFFFFFFFFFFF:FFFFFFFFFFFFFFFFFFFF:FFFFFFFFFFFFFFFFFFFF:FFF:FFFF  
@A00155:342:HHGFNDSXY:1:2213:9824:28025 2:N:0:GAACCTAG+TCCGCATA  
AGTAAAAATCCCCCTGTGTGGAGTACAAGTCATGAGGGTCCACTTCGAGCCCCATTCTGTTAGACCTT  
ACCGCACAACTGTCTGGAAACACTGCGCTATCAGTAGGCATATTAAGTTTACTTTCTCCAATCTCCC  
+  
FFF:FFFFFFFFFFFFFFFFFFFF:FFFFFFFFFFFFFFFFFFFFFFFFFFFFFFFFFFFFFFFFFFFFFFF  
FFFFFFFFFFFFFFFFFFFFFFFFFFFFFFFFFFFFFFFFFFFFFFFFFFFFFFFFFFFFFFFFFFFFFFFF  
@A00155:342:HHGFNDSXY:1:1224:4137:26725 2:N:0:GAACCTAG+TCCGCATA  
CCCCCTGTGTGGAGTACAAGTCATGAGGGTCCACTTCGAGCCCCATTCTGTTAGACCTTACCGCACAA  
CCTGTCTGGAAACACTGCGCTATCAGTAGGCATATTAAGTTTACTTTCTCCAATCTCCATTGATATA  
+  
FFFFFFFFFFFFFFF:FFFFFFFFFFFFFFF,FFFFF,F::FFFFFFFFF:FFFFFFFFFFFFFFF:FFFFFFF  
:F::FF:FFFFFFFFFFFFFFFFFFFFFFFFFFFFFFFFFFFFFFFFFFFFFFFFFFFF, :FFFFFFFFF,FFFFFFFFF  
@A00155:342:HHGFNDSXY:1:2610:4833:24392 2:N:0:GAACCTAG+TCCGCATA  
CCCCCTGTGTGGAGTACAAGTCATGAGGGTCCACTTCGAGCCCCATTCTGTTAGACCTTACCGCACAA  
CCTGTCTGGAAACACTGCGCGATCAGTAGGCATATTAAGTTTACTTTCTCCAATCTCCATTGATATA  
+  
FFFF,,:FF,FFFF,,:F:FFFFFF:F:FFFFFFFFFFFFFFF,FFFFFF:FFFFFFF:FF:FFFFFFF  
FFF:FFFF:FFFFFFF,F,,:FFF:FF::FFFFFFFFF,FFFFF:,FFFFFFFFFFFFFFFFFFFF:FFFFFFF  
@A00155:342:HHGFNDSXY:1:1539:18557:12305 1:N:0:GAACCTAG+TCCGCATA  
CCCCCTGTGTGGAGTACAAGTCATGAGGGTCCACTTCGAGCCCCATTCTGTTAGACCTTACCGCACAA  
CCTGTCTGGAAACACTGCGCTATCAGTAGGCATATTAAGTTTACTTTCTCCAATCTCCATTGATATA  
+  
FFFFFFFFFFFFFFFFFFFFFFFFFFFFFFFFFFFFFFFFFFFFFFFFFFFFFFFFFFFFFFFFFFFFFFFF  
FFFFFFFFFFFFF:FF:F:FFFFFFFFFFFF:FFFFFFFFFFFFFFFFFFFFFFFFFFFFFFFFFFFF,FFFFFFF

```
@A00155:342:HHGFNDSXY:1:2630:22028:15029 1:N:0:GAACCTAG+TCCGCATA
CCCCCTGTGTGGAGTACAAGTCATGAGGGTCCACTTCGAGCCCCATTCTGTTAGACCTTACC GCACAA
CCTGTCTGGAAACACTGCGCTATCAGTAGGCATATTAAGTTTACTTTCTCCAATCTCCCATTGATATA
+
FFFFFFFFFFFFFFFFFFFFFFFFFFFFF:FFFFFFFFFFFFFFFFFFFFFFFFFFFFFFFFFFFFFFFFFFFFFF
FFFFFFFFFFFFFFFFFFFFFFFFFFFFF:FFFFFFFFFF:FFFFFFFFFFFFFFFFFFFFFFFFFFFFFFFFFFF
@A00155:342:HHGFNDSXY:1:1433:9824:5854 2:N:0:GAACCTAG+TCCGCATA
CCCCCTGTGTGGAGTACAAGTCATGAGGGTCCACTTCGAGCCCCATTCTGTTAGACCTTACC GCACAA
CCTGTCTGGAAACACTGCGCTATCAGTAGGCATATTAAGTTTACTTTCTCCAATCTCCCATTGATATA
+
FFFFFFFFFFFFFFFFFFFFFFFFFFFFFFFFFFFFFFFFFFFFFFFFFFFFFFFFFFFFFFFFFFFFFFFF:FFFFFF, FF:FFFFFFFFFFFFFF
FFFFFFFFFFFFFFFFFFFFFFFFFFFFFFFFFFFFFFFFFFFFFFFFFFFFFFFFFFFFFFFFFFFFFFFFFFFFFFFF
@A00155:342:HHGFNDSXY:1:2343:10312:20165 1:N:0:GAACCTAG+TCCGCATA
CCCCCTGTGTGGAGTACAAGTCATGAGGGTCCACTTCGAGCCCCATTCTGTTAGACCTTACC GCACAA
CCTGTCTGGAAACACTGCGCTATCAGTAGGCATATTAAGTTTACTTTCTCCAATCTCCCATTGATATA
+
FFFFFFFFFFFFFFFFFFFFFFFFFFFFFFFFFFFFFFFFFFFFFFFFFFFFFFFFFFFFFFFFFFFFFFFF:FFFFFFFFFFFFFFFFFFFFFF
FFFFFF:FFFFFFFFFFFFFFFFFFFFFFFFFFFFFFFFFFFFFFFFFFFFFFFFFFFFFFFFFFFFFFFFFFFFFFFF
@A00155:342:HHGFNDSXY:1:2551:25048:19194 2:N:0:GAACCTAG+TCCGCATA
CCCCCTGTGTGGAGTACAAGTCATGAGGGTCCACTTCGAGCCCCATTCTGTTAGACCTTACC GCACAA
CCTGTCTGGAAACACTGCGCTATCAGTAGGCATATTAAGTTTACTTTCTCCAATCTCCCATTGATATA
+
FFFFFFFFFFFFFFFFFFFFFFFFFFFFF:FFFFFFFFFFFFFFFFFFFFFFFFFFFFF:FFFFFFFFFFFFFFFFFFFFFF
FFFFFFFFFFFFFFFFFFFFFFFFFFFFF:FFFFFFFFFFFFFFFFFFFFFFFFFFFFFFFFFFFFFFFFFFFFFFFF,F
@A00155:342:HHGFNDSXY:1:2378:12472:20118 1:N:0:GAACCTAG+TCCGCATA
CCCCCTGTGTGGAGTACAAGTCATGAGGGTCCACTTCGAGCCCCATTCTGTTAGACCTTACC GCACAA
CCTGTCTGGAAACACTGCGCTATCAGTAGGCATATTAAGTTTACTTTCTCCAATCTCCCATTGATATA
+
FFFFFFFFFFFFFFFFFFFFFFFFFFFFFFFFFFFFFFFFFFFFFFFFFFFFFFFFFFFFFFFFFFFFFFFFFFFFFF
FFFFFFFFFFFFFFFFFFFFFFFFFFFFF:FFFFFFFFFFFFFFFFFFFFFFFFFFFFFFFFFFFFFFFFFFFFFF
@A00155:342:HHGFNDSXY:1:2631:31765:34929 2:N:0:GAACCTAG+TCCGCATA
CCCCTGTGTGGAGTACAAGTCATGAGGGTCCACTTCGAGCCCCATTCTGTTAGACCTTACC GCACAAC
CTGTCTGGAAACACTGCGCTATCAGTAGGCATATTAAGTTTACTTTCTCCAATCTCCCATTGATATA
+
FFFFFFFFFFFFFFFFFFFFFFFFFFFFFFFFFFFFFFFFFFFFFFFFFFFFFFFFFFFFFFFFFFFFFFFFFFFFFF
FFFFFFFFFFFFFFFFFFFFFFFFFFFFF:FFFFFFFFFFFFFFFFFFFFFFFFFFFFFFFFFFFFFFFFFFFFFF
@A00155:342:HHGFNDSXY:1:2645:29577:24627 2:N:0:GAACCTAG+TCCGCATA
CCCTGTGTGGAGTACAAGTCATGAGGGTCCACTTCGAGCCCCATTCTGTTAGACCTTACC GCACAACC
TGTCTGGAAACACTGCGCTATCAGTAGGCATATTAAGTTTACTTTCTCCAATCTCCCATTGAT
+
FFF, FFFFFFFFFFFFFFFFFFFFFFFFFFFFFFFFFFFFFFFFFFFFFFFFFFFFFFFFFFFFFFFFFFFFF:FFFFFFFFFFFFFFFFFFFFFF
FFFFFFFFFFFFFFFFFFFFFFFFFFFFF:FFFFFFFFFFFFFFFFFFFFFFFFFFFFFFFFFFFFFFFFFFFFFF:FFFFFFFFFFFFFF
@A00155:342:HHGFNDSXY:1:1358:13792:31422 2:N:0:GAACCTAG+TCCGCATA
CCCTGTGTGGAGTACAAGTCATGAGGGTCCACTTCGAGCCCCATTCTGTTAGACCTTACC GCACAACC
TGTCTGGAAACACTGCGCTATCAGTAGGCATATTAAGTTTACTTTCTCCAATCTCCCATTGAT
+
FFFFFFFFFFFFFFFFFFFFFFFFFFFFFFFFFFFFFFFFFFFFFFFFFFFFFFFFFFFFFFFFFFFFFFFFFFFFFF
FFFFFFFFFFFFFFFFFFFFFFFFFFFFF:FFFFFFFFFFFFFFFFFFFFFFFFFFFFFFFFFFFFFFFFFFFFFF:FFFFF
@A00155:342:HHGFNDSXY:1:1274:1868:17440 2:N:0:GAACCTAG+TCCGCATA
CCCTGTGTGGAGTACAAGTCATGAGGGTCCACTTCGAGCCCCATTCTGTTAGACCTTACC GCACAACC
TGTCTGGAAACACTGCGCTATCAGTAGGCATATTAAGTTTACTTTCTCCAATCTCCCATTGATATA
+
FFF, F, FFFFFFFFFFFFFFFFFFFFFFFFFFFFFFFFFFFFFFFFFFFFFFFFFFFFFFFFFFFFFFFFF: :FFFFFFFF:FFFF:FFFFFFFF
FFFFFFFFFFFFFFFFFFFFFFFFFFFFF:FFFFFFFFFFFFFFFFFFFFFFFFFFFFF:FFFFFFFFFFFFFFFFFFFFFF
```

@A00155:342:HHGFNDSXY:1:2157:2645:17973 2:N:0:GAACCTAG+TCCGCATA  
CCCTGTGTGGAGTACAAGTCATGAGGGTCCACTTCGAGCCCCATTCTGTTAGACCTTACCGCACAAACC  
TGTCTGGAAACACTGCGCTATCAGTAGGCATATTAAGTTTACTTTCTCCAATCTCCCATTGATATAAC  
+  
F:FFFFFFFFFFFFFFFFFFFFFFFFF:FF:FFFFFFFFFFFFFFFFFFFFFFFFFFFFFFFFF:FF:FFFFFFFFFFFF  
FFFFFFFFFFFFFFFFF:FFFFFFFFFFFFFFFFF:FFFFFFFFF:FFFFFFFFFFFFFFFFFFFFFFFFFFFFFFFFF  
@A00155:342:HHGFNDSXY:1:1306:1009:36620 2:N:0:GAACCTAG+TCCGCATA  
CCTGTGTGGAGTACAAGTCATGAGGGTCCACTTCGAGCCCCATTCTGTTAGACCTTACCGCACAAACCT  
GTCTGGAAACACTGCGCTATCAGTAGGCATATTAAGTTTACTTTCTCCAATCTCCCATTGATA  
+  
FFFFFFFFFFFFFFFFFFFFFFFFFFFFFFFFFFFFFFFFFFFFFFFFFFFFFFFFFFFFFFFFF:FFFFFFFFF,FFFFFFFFFFFFFFFFF  
:FFFFFFFFFFFFFFFFF:FFF,,FFFFFF:FFFF:FFFFFFFFF:FFFF:FFFFFFFFFFFFFFFFFFFFFFFFF:FF:F  
@A00155:342:HHGFNDSXY:1:1117:24722:25801 2:N:0:GAACCTAG+TCCGCATA  
CCTGTGTGGAGTACAAGTCATGAGGGTCCACTTCGAGCCCCATTCTGTTAGACCTTACCGCACAAACCT  
GTCTGGAAACACTGCGCTATCAGTAGGCATATTAAGTTTACTTTCTCCAATCTCCCATTGATATAAACC  
+  
FFFFFFFFFFFFFFFFFFFFFFFFFFFFFFFFFFFFFFFFFFFFFFFFFFFFFFFFFFFFFFFFF,FFFFFFFFF:FFFF  
FFFFFFFFFFFFFFFFF:FFFFFFFFFFFFFFFFFFFFFFFFFFFFFFFFFFFFFFFFFFFFFFFFFFFFFFFFF:FFF  
@A00155:342:HHGFNDSXY:1:1511:9869:32142 2:N:0:GAACCTAG+TCCGCATA  
CCTGTGTGGAGTACAAGTCATGAGGGTCCACTTCGAGCCCCATTCTGTTAGACCTTACCGCACAAACCT  
GTCTGGAAACACTGCGCTATCAGTAGGCATATTAAGTTTACTTTCTCCAATCTCCCATTGATATAAACC  
+  
FFFFFFFFFFFFFFFFFFFFFFFFFFFFFFFFFFFFFFFFFFFFFFFFFFFFFFFFFFFFFFFFF:FFFFF  
FFFFF:FFFFFFFFFFFFFFFFFFFFFFFFFFFFFFFFFFFFFFFFFFFFFFFFFFFFFFFFFFFFFFFFF  
@A00155:342:HHGFNDSXY:1:2603:17924:1313 2:N:0:GAACCTAG+TCCGCATA  
CCTGTGTGGAGTACAAGTCATGAGGGTCCACTTCGAGCCCCATTCTGTTAGACCTTACCGCACAAACCT  
GTCTGGAAACACTGCGCTATCAGTAGGCATATTAAGTTTACTTTCTCCAATCTCCCATTGATATAAACC  
+  
FFFF,FFFFFFFFFFFFFFFFF:FFFFFFFFFFFFFFFFFFFFFFFFFFFFFFFFF:FFFFFFFFF:F:FFFF:FFFFFFFFF  
FFFFFFFFFFFFFFFFFFFFFFFFF:FFFFFFFFFFFFFFFFFFFFFFFFFFFFFFFFF:FFFFFFFFFFFFFFFFFFFFFFFFF  
@A00155:342:HHGFNDSXY:1:2429:6705:14418 2:N:0:GAACCTAG+TCCGCATA  
CCTGTGTGGAGTACAAGTCATGAGGGTCCACTTCGAGCCCCATTCTGTTAGACCTTACCGCACAAACCT  
GTCTGGAAACACTGCGCTATCAGTAGGCATATTAAGTTTACTTTCTCCAATCTCCCATTGATATAAACC  
+  
FFFF:FFFFF:::FFFFFFFFFFFFFFFFFFFFFFFFF:FFFFF:FFFFFFFFFFFFFFFFFFFFFFFFF:FFFFFFFFF  
FFFF:FFFFF:FFFFF:FFFF,FFFFFFFFFFFFFFFFF:,FFFFFFFFFFFFFFFFFFFFFFFFFFFFFFFFF  
@A00155:342:HHGFNDSXY:1:2469:23990:20087 2:N:0:GAACCTAG+TCCGCATA  
CCTGTGTGGAGTACAAGTCATGAGGGTCCACTTCGAGCCCCATTCTGTTAGACCTTACCGCACAAACCT  
GTCTGGAAACACTGCGCTATCAGTAGGCATATTAAGTTTACTTTCTCCAATCTCCCATTGATATAAACC  
+  
FFFFFFFFFFFFFFFFFFFFFFFFFFFFFFFFF:FFFFFFFFF:FFFFFFFFFFFFFFFFF:FFFFFFFFFFFFFFFFF  
FFFFFFFFFFFFFFFFFFFFFFFFF:FFFFFFFFFFFFFFFFFFFFFFFFFFFFFFFFF:FFFFFFFFFFFFFFFFF  
@A00155:342:HHGFNDSXY:1:1511:9869:32142 1:N:0:GAACCTAG+TCCGCATA  
GTACAAGTCATGAGGGTCCACTTCGAGCCCCATTCTGTTAGACCTTACCGCACAAACCTGTCTGGAAAC  
ACTGCGCTATCAGTAGGCATATTAAGTTTACTTTCTCCAATCTCCCATTGATATAACCCCACTCATTA  
+  
FFFFFFFFFFFFFFFFFFFFFFFFFFFFFFFFF:FFFFF:FFFFFFFFFFFFFFFFF  
FFFFFFFFFFFFFFFFFFFFFFFFF:FFFFFFFFFFFFFFFFF:FFFFFFFFFFFFFFFFF  
@A00155:342:HHGFNDSXY:1:2469:23990:20087 1:N:0:GAACCTAG+TCCGCATA  
GTACAAGTCATGAGGGTCCACTTCGAGCCCCATTCTGTTAGACCTTACCGCACAAACCTGTCTGGAAAC  
ACTGCGCTATCAGTAGGCATATTAAGTTTACTTTCTCCAATCTCCCATTGATATAACCCCACTCATTA  
+  
FFFFFFF:FFFFFFFFFFFFFFFFFFFFFFFFFFFFFFFFFFFFFFFFFFFFFFFFFFFFFFFFF:FFF:FFFFF  
FFFFFFFFFFFFFFFFFFFFFFFFF:FFFFFFFFF:FFFFFFFFFFFFFFFFF:F:FFFFFFFF:FFFFFFF:F:F



[illegible]

@A00155:342:HHGFNDSXY:1:1306:1009:36620 1:N:0:GAACCTAG+TCCGCATA  
AGTCATGAGGGTCCACTTCGAGCCCCATTCTGTTAGACCTGACCGCACAACTGTCTGGAAACACTGC  
GCTATCAGTAGGCATATTAAGTTTACTTTCTCCAATCTCCCATTGATATAACCCCACTCATTA

```
FFF::FFFFFFFFFFFFFF,FFFFFFFF:F,F,F:FFF:FFF,FFFFFFFF,,FFFF,F,FF::FFFF:FF
FFF:FF:FF,FFF:F::F:FF:FF,FFFFFFFF:F,FFFFF:,FFF,FFFFFFFFFFFFFFFFFFFF
```

@A00155:342:HHGFNDSXY:1:2364:32931:29997 1:N:0:GAACCTAG+TCCGCATA  
AGTCATGAGGGTCCACTTCGAGCCCCATTCTGTTAGACCTTACCGCACAACTGTCTGGAAACACTGC  
GCTATCAGTAGGCATATTAAGTTTACTTTCTCCAATCTCCCATTGATATAACCCCACTCATTAATAGC

[illegible]

@A00155:342:HHGFNDSXY:1:1545:5963:31735 1:N:0:GAACCTAG+TCCGCATA  
AGTCATGAGGGTCCACTTCGAGCCCCATTCTGTTAGACCTTACCGCACAACCTGTCTGGAAACACTGC  
GCTATCAGTAGGCATATTAAGTTTACTTTCTCCAATCTCCCATTGATATAACCCCACTCATTAATAGC

[illegible]

@A00155:342:HHGFNDSXY:1:2619:12671:24972 1:N:0:GAACCTAG+TCCGCATA  
AGTCATGAGGGTCCACTTCGAGCCCCATTCTGTTAGACCTTACCGCACAACCTGTCTGGAAACACTGC  
GCTATCAGTAGGCATATTAAGTTTACTTTCTCCAATCTCCCATTGATATAACCCCACTCATTAATAGC

[illegible]

FFFFFFFFFFFFFFFFFFFFFFFFFFFFFFFFFFFFFFFFFFFFFFFFFFFFFFFFFFFFFFFFFFFFFFFFFFFFFFFFFFFFFFFF  
@A00155:342:HHGFNDSXY:1:2442:19994:12759 1:N:0:GAACCTAG+TCCGCATA

AGTCATGAGGGTCCACTTCGAGCCCCATTCTGTTAGACCTTACCGCACAACTGTCTGGAAACACTGC  
GCTATCAGTAGGCATATTAAGTTTACTTTCTCCAATCTCCATTGATATAACCCCACTCATTAATAGC  
+

[illegible]

@A00155:342:HHGFNDSXY:1:2151:20799:25895 1:N:0:GAACCTAG+TCCGCATA  
AGTCATGAGGGTCCACTTCGAGCCCCATTCTGTTAGACCTTACCGCACAACTGTCTGGAAACACTGC  
GCTATCAGTAGGCATATTAAGTTTACTTTCTCCAATCTCCCATTGATATAACCCCACTCATTAATAGC

[illegible]

FFFFFFFFFFFFFFFFFF:FFFFFFFFFFFFFFFFFFFFFFFFFFFFFFFFFFFFFFFFFFFFFFFFFFFFFFFFFFFF  
 @A00155:342:HHGFNDSXY:1:2303:29062:23015 1:N:0:GAACCTAG+TCCGCATA  
 AGTCATGAGGGTCCACTTCGAGCCCCATTCTGTTAGACCTTACCGCACAACTGTCTGGAACACTGC

GCTATCAGTAGGCATATTAAGTTTACTTTCTCCAATCTCCCATTGATATAACCCCACTCATTAATAGC  
+

[illegible]

@A00155:342:HHGFNDSXY:1:2603:17924:1313 1:N:0:GAACCTAG+TCCGCATA  
AGTCATGAGGGTCCACTTCGAGCCCCATTCTGTTAGACCTTACCGCACAACTGTCTGGAAACACTGC

GCTATCAGTAGGCATATTAAGTTTACTTTCTCCAATCTCCCATTGATATAACCCCACTCAATTAATAGC  
+  
-----

[illegible]

@A00155:342:HHGFNDXXY:1:2378:12472:20118 2:N:0:GAACCTAG+TCCGCAIA  
ATGAGGGTCCACTTCGAGCCCCATTCTGTTAGACCTTACCGCACAACTGTCTGGAAACACTGCGCTA  
TCAGTAGGCATATTAAGTTTACTTTCTCCAATCTCCATTGATATAACCCCACTCATTAATAGCTCTG

+  
 #####

[illegible]

[illegible]

[illegible]



@A00155:342:HHGFNDSXY:1:2348:28275:18677 1:N:0:GAACCTAG+TCCGCATA  
ATTCTGTTAGACCTTACCGCACAACTGTCTGGAAACACTGCGCTATCAGTAGGCATATTAAGTTTAC  
TTTCTCCAATCTCCATTGATATAACCCCACTCATTAATAGCTCTGTGGCTTACTAGAGCCGCTTCAC  
+  
FFFFFFFFFFFFFFFFFFFFFFFFFFFFFFFFFFFFFFFFFFFFFFFFFFFFFFFFFFFFFFFFFFFFFFFF  
FFFFFFFF:FFFFFFFFFFFFFFFFFFFFFFFFFFFFFFFFFFFFFFFFFFFFFFFFFFFFFFFFFFFFFFFF  
@A00155:342:HHGFNDSXY:1:2537:30996:4789 1:N:0:GAACCTAG+TCCGCATA  
TTCTGTTAGACCTTACCGCACAACTGTCTGGAAACACTGCGCTATCAGTAGGCATATTAAGTTTACT  
TTCTCCAATCTCCATTGATATAACCCCACTCATTAATAGCTCTGTGGCTTACTAGAGCCGCTTCACC  
+  
FFFFFFFFFFFFFFFFFFFFFFFFFFFFFFFFFFFFFFFFFFFFFFFFFFFFFFFFFFFFFFFFFFFFFFFF  
FFFFFFFFFFFFFFFFFFFFFFFFFFFFFFFFFFFFFFFFFFFFFFFFFFFFFFFFFFFFFFFFFFFFFFFF  
@A00155:342:HHGFNDSXY:1:2151:20799:25895 2:N:0:GAACCTAG+TCCGCATA  
TCTGTTAGACCTTACCGCACAACTGTCTGGAAACACTGCGCTATCAGTAGGCATATTAAGTTTACTT  
TCTCCAATCTCCATTGATATAACCCCACTCATTAATAGCTCTGTGGCTTACTAGAGCCGCTTCACCA  
+  
FFFFFFFFFFFFFFFFFFFFFFFFFFFFFFFFFFFFFFFFFFFFFFFFFFFFFFFFFFFFFFFFFFFFFFFF  
FFFFFFFFFFFFFFFFFFFFFFFFFFFFFFFFFFFFFFFFFFFFFFFFFFFFFFFFFFFFFFFFFFFFFFFF  
@A00155:342:HHGFNDSXY:1:1178:4978:13964 2:N:0:GAACCTAG+TCCGCATA  
CTGTTAGACCTTACCGCACAACTGTCTGGAAACACTGCGCTATCAGTAGGCATATTAAGTTTACTTT  
CTCCAATCTCCATTGATATAACCCCACTCATTAATAGCTCTGTGGCTTACTAGAGCCGCTTCACCAT  
+  
FFFFFFFFF:FFFFFFFFF:FFFFF:FFF:FFFFFFFFF:FFFFFFFFFFFFFFFFFFFFFFFFFFFFF  
FFFFFFFFFFFFFFFFFFFFFFFFFFFFFFFFFFFF,FF,FFFFFFFFF:FFFFFFFFFFFFFFFFFFFFF:FFFFFFFFF  
@A00155:342:HHGFNDSXY:1:1464:30987:30389 2:N:0:GAACCTAG+TCCGCATA  
GTTAGACCTTACCGCACAACTGTCTGGAAACACTGCGCTATCAGTAGGCATATTAAGTTTACTTTCT  
CCAATCTCCATTGATATAACCCCACTCATTAATAGCTCTGTGGCTTACTAGAGCCGCTTCACCATCA  
+  
FFFFFFF,FFFFFFFFFFFFFFFF:FFFFFFFFF:FF:FFFFF:FFF::FFFFFF:FFFFFFFFFFFFFFFFF  
FFFFF:FFF:FFFF:FFFFFF,FFFFFFFFFFFFFFFF:FFFFFFFFFFFFFFFFFFFFFFFFFFFFFFFFF  
@A00155:342:HHGFNDSXY:1:2317:7572:3302 2:N:0:GAACCTAG+TCCGCATA  
TTAGACCTTACCGCACAACTGTCTGGAAACACTGCGCTATCAGTAGGCATATTAAGTTTACTTTCTC  
CAATCTCCATTGATATAACCCCACTCATTAATAGCTCTGTGGCTTACTAGAGCCGCTTCACCATCAT  
+  
FFFFFFF:FFFFFFFFFFFFFFFF:FFFFFFFFFFFFFFFF:::FFFFFFFFFFFFFFFF:FFFFFFF:FFF  
FFFFFFFFF,FFFFFFFFFFFFFFFFFFFFFFFF:FFFFFFF:FFFFFFFFFFFFFFFFFFFFFFFFFFFFF,FFFF  
@A00155:342:HHGFNDSXY:1:1323:11514:29324 2:N:0:GAACCTAG+TCCGCATA  
TAGACCTTACCGCACAACTGTCTGGAAACACTGCGCTATCAGTAGGCATATTAAGTTTACTTTCTCC  
AATCTCCATTGATATAACCCCACTCATTAATAGCTCTGTGGCTTACTAGAGCCGCTTCACCATCATT  
+  
FFFFFFF:FF:FFFFFFFFFFFFFFFFFFFFFFFFFFFFFFFFFFFFFFFFFFFFFFFFFFFFFFFFFFFFF  
FFFFFFFFF::FFFFFFFFFFFFFFFF:FFFFFFFFFFFFFFFFFFFFFFFFFFFFFFFFFFFFFFFFFFFFF:F  
@A00155:342:HHGFNDSXY:1:1323:11153:28009 2:N:0:GAACCTAG+TCCGCATA  
TAGACCTTACCGCACAACTGTCTGGAAACACTGCGCTATCAGTAGGCATATTAAGTTTACTTTCTCC  
AATCTCCATTGATATAACCCCACTCATTAATAGCTCTGTGGCTTACTAGAGCCGCTTCACCATCATT  
+  
FFFFFFFFF:FFFFFFFFFFFFFFFFFFFFFFFFFFFFFFFFFFFFFFFFFFFFFFFFFFFFFFFFFFFFF  
F,FFFFFFFFFFFFFFFFFFFFFFFFFFFFFFFFFFFFFFFFFFFFFFFFFFFFFFFFFFFFFFFFFFFFF:FFFFF:FF  
@A00155:342:HHGFNDSXY:1:1365:19479:13463 2:N:0:GAACCTAG+TCCGCATA  
GACCTTACCGCACAACTGTCTGGAAACACTGCGCTATCAGTAGGCATATTAAGTTTACTTTCTCCAA  
TCTCCATTGATATAACCCCACTCATTAATAGCTCTGTGGCTTACTAGAGCCGCTTCACCATCATTTA  
+  
FFFFFFF:FFFFFFFFFFFFFFFFFFFFFFFFFFFFFFFFFFFFFFFFFFFFFFFFFFFFFFFFFFFFFFFFF  
FFFFFFFFFFFFFFFFFFFFF:FFFFF:FFFFFFFFFFFFFFFFFFFFFFFFFFFFFFFFFFFFFFFFFFFFF

@A00155:342:HHGFNDSXY:1:2604:6994:9032 1:N:0:GAACCTAG+TCCGCATA  
ACCTTACCGCACAACTGTCTGGAAACACTGCGCTATCAGTAGGCATATTAAGTTTACTTTCTCCAAT  
CTCCCATTGATATAACCCCACTCATTAATAGCTCTGTGGCTTACTAGAGCCGCTTCACC

+

FFFFFFFFFFFFFFFFFFFFFFFFFFFFFFFFFFFFFFFFFFFFFFFFFFFFFFFFFFFFFFFFFFFFFFFF  
FFFFFFFFFFFFFFFFFFFFFFFFFFFFFFFFFFFFFFFFFFFFFFFFFFFFFFFFFFFFFFFFFFFFFFFF,FF

@A00155:342:HHGFNDSXY:1:2607:25156:29559 1:N:0:GAACCTAG+TCCGCATA  
ACCTTACCGCACAACTGTCTGGAAACACTGCGCTATCAGTAGGCATATTAAGTTTACTTTCTCCAAT  
CTCCCATTGATATAACCCCACTCATTAATAGCTCTGTGGCTTACTAGAGCCGCTTCACCATCATTTAA

+

FFFFFFFFFFFFFFFFFFFFFFFFFFFFFFFFFFFFFFFFFFFFFFFFFFFFFFFFFFFFFFFFFFFFFFFF  
FFFFFFFFFFFFFFFFFFFFFFFFFFFFFFFFFFFFFFFFFFFFFFFFFFFFFFFFFFFFFFFFFFFFFFFF

@A00155:342:HHGFNDSXY:1:1172:11388:3646 1:N:0:GAACCTAG+TCCGCATA  
ACCTTACCGCACAACTGTCTGGAAACACTGCGCTATCAGTAGGCATATTAAGTTTACTTTCTCCAAT  
CTCCCATTGATATAACCCCACTCATTAATAGCTCTGTGGCTTACTAGAGCCGCTTCACCATCATTTAA

+

FFFFFFFFFFFFFFFFFFFFFFFFFFFFFFFFFFFFFFFFFFFFFFFFFFFFFFFFFFFFFFFFFFFFFFFF  
FFFFFFFFFFFFFFFFFFFFFFFFFFFFFFFFFFFFFFFFFFFFFFFFFFFFFFFFFFFFFFFFFFFFFFFF:FFFFFFFFFFFFFFFFFFFFFFFFFFFFFFFF

@A00155:342:HHGFNDSXY:1:2348:28275:18677 2:N:0:GAACCTAG+TCCGCATA  
ACCTTACCGCACAACTGTCTGGAAACACTGCGCTATCATTAGGCATATTAAGTTTACTTTCTCCAAT  
CTCCCATTGATATAACCCCACTCATTAATAGCTCTGTGGCTTACTAGAGCCGCTTCACCATCATTTAA

+

:FFFFFFFFFFFFFFFFFFFFFFFFFFFFFFFFFFFFFFFFFFFFFFFFFFFFFFFFFFFFFFFFFFFFFFFF  
FFFFFFFFFFFFFFFFFFFFFFFFFFFFFFFFFFFFFFFFFFFFFFFFFFFFFFFFFFFFFFFFFFFFFFFF:FFFFFFFFFFFFFFFFFFFFFFFFFFFFFFFF

@A00155:342:HHGFNDSXY:1:2378:30978:22075 1:N:0:GAACCTAG+TCCGCATA  
ACCTTACCGCACAACTGTCTGGAAACACTGCGCTATCAGTAGGCATATTAAGTTTACTTTCTCCAAT  
CTCCCATTGATATAACCCCACTCATTAATAGCTCTGTGGCTTACTAGAGCCGCTTCACCATCATTTAA

+

FFFFFFFFFFFFFFFFFFFFFFFFFFFFFFFFFFFFFFFFFFFFFFFFFFFFFFFFFFFFFFFFFFFFFFFF  
FFFFFFFFFFFFFFFFFFFFFFFFFFFFFFFFFFFFFFFFFFFFFFFFFFFFFFFFFFFFFFFFFFFFFFFF,FFFFFFFFFFFFFFFFFFFFFFFFFFFFFFFF

@A00155:342:HHGFNDSXY:1:1422:14841:10974 1:N:0:GAACCTAG+TCCGCATA  
ACCTTACCGCACAACTGTCTGGAAACACTGCGCTATCAGTAGGCATATTAAGTTTACTTTCTCCAAT  
CTCCCATTGATATAACCCCACTCATTAATAGCTCTGTGGCTTACTAGAGCCGCTTCACCATCATTTAA

+

FFFFFFFFFFFFFFFFFFFFFFFFFFFFFFFFFFFFFFFFFFFFFFFFFFFFFFFFFFFFFFFFFFFFFFFF:FFFFFFFFFFFFFFFFFFFFFFFFFFFFFFFF  
FFFFFFFFFFFFFFFFFFFFFFFFFFFFFFFFFFFFFFFFFFFFFFFFFFFFFFFFFFFFFFFFFFFFFFFF:FFFFFFFFFFFFFFFFFFFFFFFFFFFFFFFF

@A00155:342:HHGFNDSXY:1:1328:4300:29543 2:N:0:GAACCTAG+TCCGCATA  
ACCTTACCGCACAACTGTCTGGAAACACTGCGCTATCAGTAGGCATATTAAGTTTACTTTCTCCAAT  
CTCCCATTGATATAACCCCACTCATTAATAGCTCTGTGGCTTACTAGAGCCGCTTCACCATCATTTAA

+

FFFFFFFFFFFFFFFFFFFFFFFFFFFFFFFFFFFFFFFFFFFFFFFFFFFFFFFFFFFFFFFFFFFFFFFF  
FFFFFFFFFFFFFFFFFFFFFFFFFFFFFFFFFFFFFFFFFFFFFFFFFFFFFFFFFFFFFFFFFFFFFFFF:FFFFFFFFFFFFFFFFFFFFFFFFFFFFFFFF

@A00155:342:HHGFNDSXY:1:1511:16947:13683 1:N:0:GAACCTAG+TCCGCATA  
CCTTACCGCACAACTGTCTGGAAACACTGCGCTATCAGTAGGCATATTAAGTTTACTTTCTCCAATC  
TCCATTGATATAACCCCACTCATTAATAGCTCTGTGGCTTACTAGAGCCGCTTCACCATCATTTAAC

+

FFFFFFFFFFFFFFFFFFFFFFFFFFFFFFFFFFFFFFFFFFFFFFFFFFFFFFFFFFFFFFFFFFFFFFFF  
FFFFFFFFFFFFFFFFFFFFFFFFFFFFFFFFFFFFFFFFFFFFFFFFFFFFFFFFFFFFFFFFFFFFFFFF

@A00155:342:HHGFNDSXY:1:2108:16938:21371 1:N:0:GAACCTAG+TCCGCATA  
CCTTACCGCACAACTGTCTGGAAACACTGCGCTATCAGTAGGCATATTAAGTTTACTTTCTCCAATC  
TCCATTGATATAACCCCACTCATTAATAGCTCTGTGGCTTACTAGAGCCGCTTCACCATCATTTAAC

+

FF,FFFFFFFFFFFFFFFFFFFFFFFFFFFFFFFFFFFFFFFFFFFFFFFFFFFFFFFFFFFFFFFF  
FF,FF:,FFFF:FF:FF,FFFFF::FFFF::FFFFFFFFFFFFFFFFFFFFFFFFFFFFFFFF:FFFFFFFFFFFFFFFF

@A00155:342:HHGFNDSXY:1:2231:12156:26897 1:N:0:GAACCTAG+TCCGCATA  
CCTTACCGCACAACTGTCTGGAAACACTGCGCTATCAGTAGGCATATTAAGTTTACTTTCTCCAATC  
TCCCATTGATATAACCCCACTCATTAATAGCTCTGTGGCTTACTAGAGCCGCTTCACCATCATTTAAC  
+  
FFFFFFFFFFFFFFFFFFFFFFFFFFFFFFFFFFFFFFFFFFFFFFFFFFFFFFFFFFFFFFFF:FF:FFFFFFFFFFFFFFFFFFFFFFFF  
FFFFFFFFFFFFFFFFFFFFFFFFFFFFFFFFFFFFFFFFFFFFFFFFFFFFFFFFFFFFFFFFFFFFFFFFFFFFFFFF  
@A00155:342:HHGFNDSXY:1:2231:14091:23296 1:N:0:GAACCTAG+TCCGCATA  
CCTTACCGCACAACTGTCTGGAAACACTGCGCTATCAGTAGGCATATTAAGTTTACTTTCTCCAATC  
TCCCATTGATATAACCCCACTCATTAATAGCTCTGTGGCTTACTAGAGCCGCTTCACCATCATTTAAC  
+  
FFFFFFFFFFFFFFFFFFFFFFFFFFFFFFFFFFFFFFFFFFFFFFFFFFFFFFFFFFFFFFFFFFFFFFFFFFFFFFFF  
FFFFFFFFFFFFFFFFFFFFFFFFFFFFFFFFFFFFFFFFFFFFFFFFFFFFFFFFFFFFFFFFFFFFFFFFFFFFFFFF:FFFF  
@A00155:342:HHGFNDSXY:1:2571:25156:22545 1:N:0:GAACCTAG+TCCGCATA  
CCTTACCGCACAACTGTCTGGAAACACTGCGCTATCAGTAGGCATATTAAGTTTACTTTCTCCAATC  
TCCCATTGATATAACCCCACTCATTAATAGCTCTGTGGCTTACTAGAGCCGCTTCACCATCATTTAAC  
+  
FFFFFFFFFFFFFFFFFFFFFFFFFFFFFFFFFFFFFFFFFFFFFFFFFFFFFFFFFFFFFFFFFFFFFFFFFFFFFFFF,FFFFFFFFFFFFFFFFFFFFFFFF  
FFFFFFFFFFFFFFFFFFFFFFFFFFFFFFFFFFFFFFFFFFFFFFFFFFFFFFFFFFFFFFFFFFFFFFFFFFFFFFFFFFFFFFFF  
@A00155:342:HHGFNDSXY:1:2537:18096:7780 1:N:0:GAACCTAG+TCCGCATA  
CCTTACCGCACAACTGTCTGGAAACACTGCGCTATCAGTAGGCATATTAAGTTTACTTTCTCCAATC  
TCCCATTGATATAACCCCACTCATTAATAGCTCTGTGGCTTACTAGAGCCGCTTCACCATCATTTAAC  
+  
FFFFFFFFFFFFFFFFFFFFFFFFFFFFFFFFFFFFFFFFFFFFFFFFFFFFFFFFFFFFFFFFFFFFFFFFFFFFFFFF  
FF:FFFFFFFFFFFFFFFFFFFFFFFFFFFFFFFFFFFFFFFFFFFFFFFFFFFFFFFFFFFFFFFFFFFFFFFFFFFFFFFF:FFFFFFFFFFFFFFFFFFFFFFFF  
@A00155:342:HHGFNDSXY:1:2140:1542:8077 1:N:0:GAACCTAG+TCCGCATA  
CCTTACCGCACAACTGTCTGGAAACACTGCGCTATCAGTAGGCATATTAAGTTTACTTTCTCCAATC  
TCCCATTGATATAACCCCACTCATTAATAGCTCTGTGGCTTACTAGAGCCGCTTCACCATCATTTAAC  
+  
FFFFFFFFFFFFFFFFFFFFFFFFFFFFFFFFFFFFFFFFFFFFFFFFFFFFFFFFFFFFFFFFFFFFFFFFFFFFFFFF:FF  
FFFFFFFFFFFFFFFFFFFFFFFFFFFFFFFFFFFFFFFFFFFFFFFFFFFFFFFFFFFFFFFFFFFFFFFFFFFFFFFF:FFFFFFFFFFFFFFFFFFFFFFFF:F:FFFF:FFFF,FFFFFFFFFFFF:F  
@A00155:342:HHGFNDSXY:1:1155:29071:31485 1:N:0:GAACCTAG+TCCGCATA  
TACCGCACAACTGTCTGGAAACACTGCGCTATCAGTAGGCATATTAAGTTTACTTTCTCCAATCTCC  
CATTGATATAACCCCACTCATTAATAGCTCTGTGGCTTACTAGAGCCGCTTCACCATCATTTAACACA  
+  
FFFFFFFFFFFFFFFFFFFFFFFFFFFFFFFFFFFFFFFFFFFFFFFFFFFFFFFFFFFFFFFFFFFFFFFFFFFFFFFF  
FF,FFFFFFFFFFFFFFFFFFFFFFFFFFFFFFFFFFFFFFFFFFFFFFFFFFFFFFFFFFFFFFFFFFFFFFFFFFFFFFFF:FFFFFFFFFFFFF  
@A00155:342:HHGFNDSXY:1:2205:17499:33708 2:N:0:GAACCTAG+TCCGCATA  
CGCACAACTGTCTGGAAACACTGCGCTATCAGTAGGCATATTAAGTTTACTTTCTCCAATCTCCCAT  
TGATATAACCCCACTCATTAATAGCTCTGTGGCTTACTAGAGCCGCTTCACCATCATTTAA  
+  
FFFFFFFFFFFFFFFFFFFFFFFFFFFFFFFFFFFFFFFFFFFFFFFFFFFFFFFFFFFFFFFFFFFFFFFFFFFFFFFF  
FFFFFFFFFFFFFFFFFFFFFFFFFFFFFFFFFFFFFFFFFFFFFFFFFFFFFFFFFFFFFFFFFFFFFFFFFFFFFFFF  
@A00155:342:HHGFNDSXY:1:2267:16432:3583 2:N:0:GAACCTAG+TCCGCATA  
GCACAACTGTCTGGAAACACTGCGCTATCAGTAGGCATATTAAGTTTACTTTCTCCAATCTCCCAT  
GATATAACCCCACTCATTAATAGCTCTGTGGCTTACTAGAGCCGCTTCACCATCATTTAA  
+  
,FFFFFFFFFFFFFFFFFFFFFFFFFFFFFFFFFFFFFFFFFFFFFFFFFFFFFFFFFFFFFFFFFFFFFFFFFFFFFFFF:FFFFFFFFFFFFFFFFFFFFFFFFFFFFFFFF:FF:FF  
FFFFFFFFFFFFFFFFFFFFFFFFFFFFFFFFFFFFFFFFFFFFFFFFFFFFFFFFFFFFFFFFFFFFFFFFFFFFFFFF  
@A00155:342:HHGFNDSXY:1:1242:20645:12633 2:N:0:GAACCTAG+TCCGCATA  
GCACAACTGTCTGGAAACACTGCGCTATCAGTAGGCATATTAAGTTTACTTTCTCCAATCTCCCAT  
GATATAACCCCACTCATTAATAGCTCTGTGGCTTACTAGAGCCGCTTCACCATCATTTAA  
+  
FFFFFFFFFFFFFFFFFFFFFFFFFFFFFFFFFFFFFFFFFFFFFFFFFFFFFFFFFFFFFFFFFFFFFFFFFFFFFFFF:FFFFFFFFFFFFFFFFFFFFFFFFFFFFFFFF  
FFFFFFFFFFFFFFFFFFFFFFFFFFFFFFFFFFFFFFFFFFFFFFFFFFFFFFFFFFFFFFFFFFFFFFFFFFFFFFFF:FFFF:FFFFFFFFFFFFFFFFFFFFFFFFFFFFFFFF:FFFFFFFFFFFFFFFFFFFF



@A00155:342:HHGFNDSXY:1:1613:22110:18490 2:N:0:GAACCTAG+TCCGCATA  
ACAACCTGTCTGGAAACACTGCGCTATCAGTAGGCATATTAAGTTTACTTTCTCCAATCTCCCATTGA  
TATAACCCCCACTCATTAATAGCTCTGTGGCTTACTAGAGCCGCTTCACCATCATTTAACACATCGTAT  
+  
:FFFFFFFFFFFFFFFFFFFFFFFFFFFFFFFFFFFFFFFFFFFFFFFFFFFFFFFFFFFFFFFFFFFFFFFFFFFFF, :FFFFFFFFFF  
FFFF:FFFFFFFFFFFFFF:FFFFFFFFFFFFFFFFFFFFFFFFFFFFFFFFFFFFFFFFFFFFFFFFFFFFFFFF:FFFFFFFF  
@A00155:342:HHGFNDSXY:1:2469:28637:28729 1:N:0:GAACCTAG+TCCGCATA  
TGTCTGGAAACACTGCGCTATCAGTAGGCATATTAAGTTTACTTTCTCCAATCTCCCATTGATATAAC  
CCCCACTCATTAATAGCTCTGTGGCTTACTAGAGCCGCTTCACCATCATTTAACACATCGTATCTTCTCT  
+  
FFFFFFFFFFFFFFFFFFFFFFFFFFFFFFFFFFFFFFFFFFFFFFFFFFFFFFFFFFFFFFFFFFFFFFFFFFFFFFFF  
FFFFFFFFFFFFFFFFFFFFFFFFFFFFFFFFFFFFFFFFFFFFFFFFFFFFFFFFFFFFFFFFFFFFFFFFFFFFFFFF:  
@A00155:342:HHGFNDSXY:1:1177:18611:23578 1:N:0:GAACCTAG+TCCGCATA  
TGTCTGGAAACACTGCGCTATCAGTAGGCATATTAAGTTTACTTTCTCCAATCTCCCATTGATATAAC  
CCCCACTCATTAATAGCTCTGTGGCTTACTAGAGTCGCTTCACCATCATTTAACACATCGTATCTTCTCT  
+  
FFFFFFFFFFFFFFFFFFFFFFFFFFFFFFFFFFFFFFFFFFFFFFFFFFFFFFFFFFFFFFFFFFFFFFFFFFFFFFFF  
FFFFFFFFFFFFFFFFFFFFFFFFFFFFFFFFFFFFFFFFFFFFFFFFFFFFFFFFFFFFFFFFFFFFFFFFFFFFFFFF:  
@A00155:342:HHGFNDSXY:1:1444:18114:24565 1:N:0:GAACCTAG+TCCGCATA  
TCTGGAAACACTGCGCTATCAGTAGGCATATTAAGTTTACTTTCTCCAATCTCCCATTGATATAACCC  
CACTCATTAATAGCTCTGTGGCTTACTAGAGCCGCTTCACCATCATTTAACACATCGTATCTTCTCTCT  
+  
FFFFFFFFFFFFFFFFFFFFFFFFFFFFFFFFFFFFFFFFFFFFFFFFFFFFFFFFFFFFFFFFFFFFFFFFFFFFFFFF  
FFFFFFFFFFFFFFFFFFFFFFFFFFFFFFFFFFFFFFFFFFFFFFFFFFFFFFFFFFFFFFFFFFFFFFFFFFFFFFFF:F:  
@A00155:342:HHGFNDSXY:1:1410:31819:28385 1:N:0:GAACCTAG+TCCGCATA  
CTGGAAACACTGCGCTATCAGTAGGCATATTAAGTTTACTTTCTCCAATCT  
+  
FFFFFFFFFFFFFFFFFFFFFFFFFFFFFFFFFFFFFFFFFFFFFFFFFFFFFFFFFFFFFFFFFFFFFFFFFFFFFFFF  
@A00155:342:HHGFNDSXY:1:1528:10565:15436 1:N:0:GAACCTAG+TCCGCATA  
CTGGAAACACTGCGCTATCAGTAGGCATATTAAGTTTACTTTCTCCAATCTCCCATTGATATAACCCC  
ACTCATTAATAGCTCTGTGGCTTACTAGAGCCGCTTCACCATCATTTAACACATCGTATCTTCTCTCT  
+  
FFFFFFFFFFFFFFFFFFFFFFFFFFFFFFFFFFFFFFFFFFFFFFFFFFFFFFFFFFFFFFFFFFFFFFFFFFFFFFFF  
, FFFFFFFFFFFFFFFFFFFFFFFFFFFFFFFFFFFFFFFFFFFFFFFFFFFFFFFFFFFFFFFFFFFFFFFFFFFFFF:  
@A00155:342:HHGFNDSXY:1:1641:11035:26741 2:N:0:GAACCTAG+TCCGCATA  
TGGAACACTGCGCTATCAGTAGGCATATTAAGTTTACTTTCTCCAATCTCCCATTGATATAACCCCA  
CTCATTAATAGCTCTGTGGCTTACTAGAGCCGCTTCACCATCATTTAACACATCGTATCTTCTCTTA  
+  
FFFFFFFFFFFFFFF:FFFFFFFFF:FFFFFFFFFFFFFFFFFFFFFFFFFFFFFFFFFFFFFFFFFFFFFFFFFFFF  
FFFFFFFFF:FFFF:FFF:FFFFFFFFFFFFFFFFFFFFFFFFFFFFFFFFFFFFFFFFFFFFFFFFFFFFFFFFF:  
@A00155:342:HHGFNDSXY:1:2554:7591:27352 2:N:0:GAACCTAG+TCCGCATA  
TGGAACACTGCGCTATCAGTAGGCATATTAAGTTTACTTTCTCCAATCTCCCATTGATATAACCCCA  
CTCATTAATAGCTCTGAGGCTTACTAGAGCCGCTTCACCATCATTTAACACATCGTATCTTCTCTTA  
+  
FFFFFFFFFFFFFFF:FF:FFFF:FFFFFFFFFFFF, FF:FFFFFFFFFFFFFFFFFFFFFFFFFFFFFFFFFFFF  
FFFFFFFFFFFFFFFFFFFF, FFFFFFFFFFFFFFFFFFFFFFFFFFFFFFFFFFFFFFFFFFFFFFFFFFFFFFFFFF  
@A00155:342:HHGFNDSXY:1:1155:29071:31485 2:N:0:GAACCTAG+TCCGCATA  
TGGAACACTGCGCTATCAGTAGGCATATTAAGTTTACTTTCTCCAATCTCCCATTGATATAACCCCA  
CTCATTAATAGCTCTGTGGCTTACTAGAGCCGCTTCACCATCATTTAACACATCGTATCTTCTCTTA  
+  
FFFFFFFFFFFFFFF, FFFFFFFFFFFFFFFFFFFFFFFFFFFFFFFFFFFFFFFFFFFFFFFFFFFFFFFFFFFFFF:  
FFFFFFFFFFFFFFFFFFFFFFFFFFFFFFFFFFFFFFFFFFFFFFFFFFFFFFFFFFFFFFFFFFFFFFFFFFFFF:  
@A00155:342:HHGFNDSXY:1:2150:13548:32565 2:N:0:GAACCTAG+TCCGCATA  
TGGAACACTGCGCTATCAGTAGGCATATTAAGTTTACTTTCTCCAATCTCCCATTGATATAACCCCA

CTCATTAATAGCTCTGTGGCTTACTAGAGCCGCTTCACCATCATTTAACACATCGTATCTTCCTCTTA  
+  
FFFF:FFFFFFFF:FFFFFFFFFFFFFFFFFFFFFFFFFFFFFFFFFFFFFFFFFFFFFFFFFFFFFFFFFFFFF:  
FFF:FFFFFFFF:FFFFFFFFFFFFFFFFFFFFFFFFFFFFFFFFFFFFFFFFFFFFFFFFFFFFFFFFFFFFF:FF  
@A00155:342:HHGFNDSXY:1:1249:29261:31344 2:N:0:GAACCTAG+TCCGCATA  
TGGAACACTGCGCTATCAGTAGGCATATTAAGTTTACTTTCTCCAATCTCCCATTTGATATAACCCCA  
CTCATTAATAGCTCTGTGGCTTACTAGAGCCGCTTCACCATCATTTAACACATCGTATCTTCCTCTTA  
+  
F:FFFF:FFFFFFFFFFFFFFFF:FFFFFFFFFFFFFFFFFFFFFFFFFFFFFFFFFFFFFFFFFFFFFFFFFFFFF,FFFFFFFFFFFF,FFFFF::  
FFFFFFFFFFFFFFFFFFFFFFFF:FFFF:FFFFFFFFFFFFFFFFFFFFFFFFFFFFFFFFFFFFFFFFFFFFFFFFFFFFFFFFFFFFF:FFFFF:FFFFFFFFFFFF:FFF  
@A00155:342:HHGFNDSXY:1:1210:27868:33379 2:N:0:GAACCTAG+TCCGCATA  
GGAAACACTGCGCTATCAGTAGGCATATTAAGTTTACTTTCTCCAATCTCCCATTTGATATAACCCAC  
TCATTAATAGCTCTGTGGCTTACTAGAGCCGCTTCACCATCATTTAACACATCGTATCTTCCTCTTAT  
+  
FFFFFFFFFFFFFFFFFFFFFFFFFFFFFFFFFFFFFFFFFFFFFFFFFFFFFFFFFFFFFFFFFFFFFFFFFFFFF:FFFFF:FFFFF:  
FFFFFFFFFFFFFFFFFFFFFFFFFFFFFFFFFFFFFFFFFFFFFFFFFFFFFFFFFFFFFFFFFFFFFFFFFFFFF  
@A00155:342:HHGFNDSXY:1:1507:26259:28432 2:N:0:GAACCTAG+TCCGCATA  
GGAAACACTGCGCTATCAGTAGGCATATTAAGTTTACTTTCTCCAATCTCCCATTTGATATAACCCAC  
TCATTAATAGCTCTGTGGCTTACTAGAGCCGCTTCACCATCATTTAACACATCGTATCTTCCTCTTAT  
+  
FFFFFFFFFFFFFFFFFFFFFFFFFFFFFFFFFFFFFFFFFFFFFFFFFFFFFFFFFFFFFFFFFFFFFFFFFFFFF:FFFFFFFFFFFF:FFFFFFFFFFFF:FFFFFFFFFFFF  
FFFF:FFFFFFFFFFFFFFFFFFFFFFFFFFFFFFFFFFFFFFFFFFFFFFFFFFFFFFFFFFFFFFFFFFFFFFFFFFFFF  
@A00155:342:HHGFNDSXY:1:2442:19994:12759 2:N:0:GAACCTAG+TCCGCATA  
GGAAACACTGCGCTATCAGTAGGCATATTAAGTTTACTTTCTCCAATCTCCCATTTGATATAACCCAC  
TCATTAATAGCTCTGTGGCTTACTAGAGCCGCTTCACCATCATTTAACACATCGTATCTTCCTCTTAT  
+  
FFFFFFFFFFFF:FFFFFFFFFFFFFFFFFFFFFFFF,FFFFFFFFFFFFFFFFFFFFFFFFFFFFFFFFFFFFFFFFFFFFF:FFFF,F  
FFFFFFFFFFFFFFFFFFFFFFFFFFFFFFFFFFFFFFFFFFFFFFFFFFFFFFFFFFFFFFFFFFFFFFFFFFFFF  
@A00155:342:HHGFNDSXY:1:1210:26341:31234 2:N:0:GAACCTAG+TCCGCATA  
GGAAACACTGCGCTATCAGTAGGCATATTAAGTTTACTTTCTCCAATCTCCCATTTGATATAACCCAC  
TCATTAATAGCTCTGTGGCTTACTAGAGCCGCTTCACCATCATTTAACACATCGTATCTTCCTCTTAT  
+  
FFFFFFFFFFFF:FFFF:F:FFFFFFFFFFFFFFFFFFFF:FFFF,FFFFFFFF::FFFFFFFF:FFFFF:FFFFF  
FFFFFFFF:FFFFFFFF:FFFFFFFFFFFFFFFFFFFFFFFFFFFFFFFFFFFFFFFFFFFFFFFFFFFFFFFFFFFFF,FFFFF,FFF  
@A00155:342:HHGFNDSXY:1:1351:29206:20823 2:N:0:GAACCTAG+TCCGCATA  
GGAAACACTGCGCTATCAGTAGGCATATTAAGTTTACTTTCTCCAATCTCCCATTTGATATAACCCAC  
TCATTAATAGCTCTGTGGCTTACTAGAGCCGCTTCACCATCATTTAACACATCGTATCTTCCTCTTAT  
+  
FFFFFFFFFFFFFFFFFFFFFFFFFFFFFFFFFFFFFFFFFFFFFFFFFFFFFFFFFFFFFFFFFFFFFFFFFFFFF  
FFFFFFFFFFFFFFFFFFFFFFFFFFFFFFFFFFFFFFFFFFFFFFFFFFFFFFFFFFFFFFFFFFFFFFFFFFFFF  
@A00155:342:HHGFNDSXY:1:2205:17499:33708 1:N:0:GAACCTAG+TCCGCATA  
GAAACACTGCGCTATCAGTAGGCATATTAAGTTTACTTTCTCCAATCTCCCATTTGATATAACCCCACT  
CATTAATAGCTCTGTGGCTTACTAGAGCCGCTTCACCATCATTTAACACATCGTATCTTCCTCTTAT  
+  
FFFFFFFFFFFFFFFFFFFFFFFFFFFFFFFFFFFFFFFFFFFFFFFFFFFFFFFFFFFFFFFFFFFFFFFFFFFFF:FFFFFFFFFFFFFFFFFFFF  
FFFFFFFFFFFFFFFFFFFFFFFFFFFFFFFFFFFFFFFFFFFFFFFFFFFFFFFFFFFFFFFFFFFFFFFFFFFFF,FFFFFFFFFFFFFFFFFFFF:FFF:FFFFFFFFFFFF  
@A00155:342:HHGFNDSXY:1:1351:28058:22310 2:N:0:GAACCTAG+TCCGCATA  
GAAACACTGCGCTATCAGTAGGCATATTAAGTTTACTTTCTCCAATCTCCCATTTGATATAACCCCACT  
CATTAATAGCTCTGTGGCTTACTAGAGCCGCTTCACCATCATTTAACACATCGTATCTTCCTCTTAT  
+  
FFFFFFFFFFFFFFFFFFFFFFFFFFFFFFFFFFFFFFFFFFFFFFFFFFFFFFFFFFFFFFFFFFFFFFFFFFFFF  
FFFFFFFFFFFFFFFFFFFFFFFFFFFFFFFFFFFFFFFFFFFFFFFFFFFFFFFFFFFFFFFFFFFFFFFFFFFFF  
@A00155:342:HHGFNDSXY:1:1574:1642:26913 1:N:0:GAACCTAG+TCCGCATA  
GAAACACTGCGCTATCAGTAGGCATATTAAGTTTACTTTCTCCAATCTCCCATTTGATATAACCCCACT

CATTAATAGCTCTGTGGCTTACTAGAGCCGCTTCACCATCATTTAACACATCGTATCTTCCTCTTATC  
+  
FFFFFFFFFFFFFFFFFFFFFFFFFFFFFFFFFFFFFFFFFFFFFFFFFFFFFFFFFFFFFFFFFFFFFFFF  
FFFFF:FFFFFFFFFFFFFFFFFFFFFFFFFFFFFFFFFFFFFFFFFFFFFFFFFFFFFFFFFFFFFFFF  
@A00155:342:HHGFNDSXY:1:1242:20645:12633 1:N:0:GAACCTAG+TCCGCATA  
AAACACTGCGCTATCAGTAGGCATATTAAGTTTACTTTCTCCAATCTCCCATTTGATATAACCCCACTC  
ATTAATAGCTCTGTTGCTTACTAGAGCCGCTTCACCATCATTTAACACATCGTATCTTCC  
+  
FFF:FFFF:FFF,:FFFFFFFF:FFFF:FFFF:FF:F,FFFF::FFF:FFF,F,FF,FFFF:,F  
F,FFF,F:F:,F,FFFFFF,F:F,FF,F,F,FFF:FFF:FFF:F,F:,FF,,FFF  
@A00155:342:HHGFNDSXY:1:2267:16432:3583 1:N:0:GAACCTAG+TCCGCATA  
AAACACTGCGCTATCAGTAGGCATATTAAGTTTACTTTCTCCAATCTCCCATTTGATATAACCCCACTC  
ATTAATAGCTCTGTGGCTTACTAGAGCCGCTTCACCATCATTTAACACATCGTATCTTAC  
+  
FFF,FF:FFFFFF:F,FF:FFFFFF:FFFF:FFFFFF:FFFFFF,FFF:FFFFFF:F  
FFFFFF:F:FFF:FF,FF:FFF:F,FFFFFF:F:FFF,FFFFFF,F:F::FFF,,F,F  
@A00155:342:HHGFNDSXY:1:1405:31295:21308 2:N:0:GAACCTAG+TCCGCATA  
AAACACTGCGCTATCAGTAGGCATATTAAGTTTACTTTCTCCAATCTCCCATTTGATATAACCCCACTC  
ATTAATAGCTCTGTGGCTTACTAGAGCCGCTTCACCATCATTTAACACATCGTATCTTCCTCTTATCG  
+  
FFFFFFFFFFFFFFFFFFFFFFFFFFFFFFFFFFFFFFFFFFFFFFFFFFFFFFFFFFFFFFFFFFFFFFFF  
FFFFFFFFFFFFFFFFFFFFFFFFFFFFFFFFFFFFFFFFFFFFFFFFFFFFFFFFFFFFFFFFFFFFFFFF  
@A00155:342:HHGFNDSXY:1:2550:4788:18928 2:N:0:GAACCTAG+TCCGCATA  
CACTGCGCTATCAGTAGGCATATTAAGTTTACTTTCTCCAATCTCCCATTTGATATAACCCCACTCATT  
AATAGCTCTGTGGCTTACTAGAGCCGCTTCACCATCATTTAACACATCGTATCTTCCTCTTATCG  
+  
F:FFFFFF:FFFFFFFFFFFF,FFF:FFFFFF:FFFFFF:FFFFFF:FFFFFF:FFFFFF:FFFFFF  
FFFFFFFFFFFFFFFFFFFFFFFFFFFFFFFFFFFFFFFFFFFFFFFFFFFFFFFFFFFFFFFFFFFFFFFF  
@A00155:342:HHGFNDSXY:1:2231:12156:26897 2:N:0:GAACCTAG+TCCGCATA  
CACTGCGCTATCAGTAGGCATATTAAGTTTACTTTCTCCAATCTCCCATTTGATATAACCCCACTCATT  
AATAGCTCTGTGGCTTACTAGAGCCGCTTCACCATCATTTAACACATCGTATCTTCCTCTTATCGATG  
+  
FFF,F:FFFFFFFFFFFFFFFFFFFF:FF:FFFFFF:FF:FFFFFFFFFFFFFFFFFFFFFFFFFFFF  
FFFFFFFFFFFFFFFFFFFFFFFFFFFFFFFFFFFFFFFFFFFFFFFFFFFFFFFFFFFFFFFFFFFFFFFF  
@A00155:342:HHGFNDSXY:1:2231:14091:23296 2:N:0:GAACCTAG+TCCGCATA  
CACTGCGCTATCAGTAGGCATATTAAGTTTACTTTCTCCAATCTCCCATTTGATATAACCCCACTCATT  
AATAGCTCTGTGGCTTACTAGAGCCGCTTCACCATCATTTAACACATCGTATCTTCCTCTTATCGATG  
+  
FFFFFFFFFFFFFFFFFFFFFFFFFFFFFFFFFFFFFFFFFFFFFFFFFFFFFFFFFFFFFFFFFFFFFFFF  
FFFFFFFFFFFFFFFFFFFFFFFFFFFFFFFFFFFFFFFFFFFFFFFFFFFFFFFFFFFFFFFFFFFFFFFF  
@A00155:342:HHGFNDSXY:1:2327:7048:18082 2:N:0:GAACCTAG+TCCGCATA  
ACTGCGCTATCAGTAGGCATATTAAGTTTACTTTCTCCAATCTCCCATTTGATATAACCCCACTCATT  
ATAGCTCTGTGGCTTACTAGAGCCGCTTCACCATCATTTAACACATCGTATCTTCCTCTTATCG  
+  
FFFFFFFFFFFFFFFFFFFFFFFFFFFF,:FFFFFFFFFFFFFFFFFFFFFFFFFFFFFFFF:FFFFFFFFFFFF  
F:FFFFFF:FFFFFFFFFFFFFFFFFFFFFFFFFFFFFFFFFFFFFFFFFFFFFFFFFFFFFFFFFFFF  
@A00155:342:HHGFNDSXY:1:2123:32723:28103 2:N:0:GAACCTAG+TCCGCATA  
CTGCGCTATCAGTAGGCATATTAAGTTTACTTTCTCCAATCTCCCATTTGATATAACCCCACTCATTAA  
TAGCTGTGTGGCTTACTAGAGCCGCTTCACCATCATTTAACACATCGTATCTTCCTCTTATCGATGTG  
+  
:FFFFFFFFFFFFFFFFFFFF:FF:F:FFFFFFFFFFFF:FFFFFFFFFFFFFFFFFFFFFFFFFFFF:FFFF  
FFFFFFFFFFFFFFFFFFFFFFFFFFFFFFFFFFFFFFFFFFFFFFFFFFFFFFFFFFFFFFFFFFFFFFFF  
@A00155:342:HHGFNDSXY:1:2537:30996:4789 2:N:0:GAACCTAG+TCCGCATA  
CTGCGCTATCAGTAGGCATATTAAGTTTACTTTCTCCAATCTCCCATTTGATATAACCCCACTCATTAA

TAGCTCTGTGGCTTACTAGAGCCGCTTCACCATCATTTAACACATCGTATCTTCCTCTTATCGATGTG  
+  
FFFFFFFFFFFFFF,FFFFFF:FFFF,:FFFFFFFFFFFFFFFF:FFFF,F,FFFF,FFFFFFFF  
FFFFFFFFFFFFFFFFFFFFFFFF:FFFF:FFFFFFFFFFFFFFFFFFFFFFFF,FFF:FFF  
@A00155:342:HHGFNDSXY:1:1574:1642:26913 2:N:0:GAACCTAG+TCCGCATA  
GCGCTATCAGTAGGCATATTAAGTTTACTTTCTCCAATCTCCATTGATATAACCCCACTCATTAATA  
GCTCTGTGGCTTACTAGAGCCGCTTCACCATCATTTAACACATCGTATCTTCCTCTTATCGATGTGAA  
+  
FFFFFFFFFFFFFFFFFFFFFFFFFFFFFFFF:FFFFFFFFFFFFFFFFFFFFFFFF:FFFF,FF,FFFF  
FFFFFF:FFFFFFFFFFFFFFFFFFFFFFFF:FFFFFFFF:FFFF:FF:FFFFFFFFFFFFFF,FFF  
@A00155:342:HHGFNDSXY:1:2571:25156:22545 2:N:0:GAACCTAG+TCCGCATA  
GCGCTATCAGTAGGCATATTAAGTTTACTTTCTCCAATCTCCATTGATATAACCCCACTCATTAATA  
GCTCTGTGGCTTACTAGAGCCGCTTCACCATCATTTAACACATCGTATCTTCCTCTTATCGATGTGAA  
+  
FFFFFFFFFFFFFFFFFFFFFFFFFFFFFFFF:FFFFFFFFFFFFFF:FFFFFFFFFFFFFFFFFFFFFFFF  
FFFFFFFFFFFFFFFFFFFFFFFFFFFFFFFFFFFFFFFFFFFFFFFFFFFFFFFFFFFFFFFFFFFFF  
@A00155:342:HHGFNDSXY:1:2554:7591:27352 1:N:0:GAACCTAG+TCCGCATA  
GCGCTATCAGTAGGCATATTAAGTTTACTTTCTCCAATCTCCATTGATATAACCCCACTCATTAATA  
GCTCTGAGGCTTACTAGAGCCGCTTCACCATCATTTAACACATCGTATCTTCCTCTTATCGATGTGAA  
+  
FFFFFFFFFFFFFFFFFFFFFFFFFFFFFFFFFFFFFFFFFFFFFFFFFFFFFFFFFFFFFFFFFFFFF  
FFFFFF,FFFFFFFFFFFFFFFFFFFFFFFFFFFFFFFF:FFFFFFFFFFFFFF:FFF:FFF  
@A00155:342:HHGFNDSXY:1:1512:16740:34898 1:N:0:GAACCTAG+TCCGCATA  
CGCTATCAGTAGGCATATTAAGTTTACTTTCTCCAATCTCCATTGATATAACCCCACTCATTAATAG  
CTCTGTGGCTTACTAGAGCCGCTTCACCATCATTTAACACATCGTATCTTCCTCTTATCGATGTGAAT  
+  
FFFFFFFFFFFFFFFFFFFFFFFFFFFFFFFFFFFFFFFFFFFFFFFFFFFFFFFFFFFFFFFFFFFF,FF:FFFFF  
F:FFFFFFFFFFFFFFFFFFFFFFFF:FFF:FFFFFFFF:FFF:FFFFFFFF:FFFFFFFFFFFFFF  
@A00155:342:HHGFNDSXY:1:1642:10565:36479 2:N:0:GAACCTAG+TCCGCATA  
CGCTATCAGTAGGCATATTAAGTTTACTTTCTCCAATCTCCATTGATATAACCCCACTCATTAATAG  
CTCTGTGGCTTACTAGAGCCGCTTCACCATCATTTAACACATCGTATCTTCCTCTTATCGATGTGAAT  
+  
FFFFFFFFFFFFFFFFFFFFFFFFFFFFFFFFFFFFFFFFFFFFFFFFFFFFFFFFFFFFFFFFFFFFF  
FFFFFFFFFFFFFFFFFFFFFFFF:FFFFFFFFFFFFFFFFFFFFFFFFFFFFFFFFFFFFFFFFFFFFF  
@A00155:342:HHGFNDSXY:1:2323:6976:10755 1:N:0:GAACCTAG+TCCGCATA  
GCTATCAGTAGGCATATTAAGTTTACTTTCTCCAATCTCCATTGATATAACCCCACTCATTAATAGC  
TCTGTGGCTTACTAGAGCCGCTTCACCATCATTTAACACATCGTATCTTCCTCTTATCGATGTGAATT  
+  
FFFFFFFFFFFFFFFFFFFFFFFFFFFFFFFFFFFFFFFF:FFFFFFFFFFFFFFFFFFFFFFFFFFFFFFFF  
FFFFFFFF:FFFF:FFFFFFFFFFFFFFFFFFFFFFFF:FFFFFFFFFFFFFFFFFFFFFFFFFFFFF  
@A00155:342:HHGFNDSXY:1:1528:10565:15436 2:N:0:GAACCTAG+TCCGCATA  
GCTATCAGTAGGCATATTAAGTTTACTTTCTCCAATCTCCATTGATATAACCCCACTCATTAATAGC  
TCTGTGGCTTACTAGAGCCGCTTCACCATCATTTAACACATCGTATCTTCCTCTTATCGATGTGAATT  
+  
FFFFFFFFFFFF:FFFFF,FFFFFFFFFFFFFFFF:FFFFFFFF:FFFFFFFFFFFFFFFF:F:FFFFF  
FFFFFFFFFFFFFFFFFFFFFFFF:FFF:FFFFFFFFFFFFFFFF:FFFFFFFFFFFFFFFFFFFFF  
@A00155:342:HHGFNDSXY:1:1642:10565:36479 1:N:0:GAACCTAG+TCCGCATA  
GCTATCAGTAGGCATATTAAGTTTACTTTCTCCAATCTCCATTGATATAACCCCACTCATTAATAGC  
TCTGTGGCTTACTAGAGCCGCTTCACCATCATTTAACACATCGTATCTTCCTCTTATCGATGTGAATT  
+  
FFFFFFFFFFFFFFFFFFFFFFFFFFFFFFFFFFFFFFFFFFFFFFFFFFFFFFFFFFFFFFFFFFFFF  
FFFFFFFFFFFFFFFFFFFFFFFFFFFFFFFFFFFFFFFFFFFFFFFFFFFFFFFFFFFFFFFFFFFFF  
@A00155:342:HHGFNDSXY:1:1507:26259:28432 1:N:0:GAACCTAG+TCCGCATA  
TATCAGTAGGCATATTAAGTTTACTTTCTCCAATCTCCATTGATATAACCCCACTCATTAATAGCTC

TGTGGCTTACTAGAGCCGCTTCACCATCATTTAACACATCGTATCTTCTCTTATCGATGTGAATTGA  
 +  
 FFFFFFFFFFFFFFFFFFFFFFFFFFFFFFFFFFFFFFFFFFFFFFFFFFFFFFFFFFFFFFFFFFFFFFFFFF:FFFFFFFFFFFFFFFFFFFF  
 FF:FFFFFFFFFFFFFFFFFFFFFFFFFFFFFFFFFFFFFFFFFFFFFFFFFFFFFFFFFFFFFFFFFFFFFFFF,FFFF  
 @A00155:342:HHGFNDSXY:1:2218:21386:36933 1:N:0:GAACCTAG+TCCGCATA  
 TATCAGTAGGCATATTAAGTTTACTTTCTCCAATCTCCCATTTGATATAACCCCACTCATTAATAGCTC  
 TGTGGCTTACTAGAGCCGCTTCACCATCATTTAACACATCGTATCTTCTCTTATCGATGTGAATTGA  
 +  
 FFFFFFFFFFFFFFFFFFFFFFFFFFFFFFFFFFFFFFFFFFFFFFFFFFFFFFFFFFFFFFFFFFFFFFFFF:FFFFFFFF  
 FFFFFFFFFFFFFFFFFFFFFFFFFFFFFFFFFFFFFFFFFFFFFFFFFFFFFFFFFFFFFFFFFFFFFFFFFF  
 @A00155:342:HHGFNDSXY:1:2556:6497:19257 1:N:0:GAACCTAG+TCCGCATA  
 TATCAGTAGGCATATTAAGTTTACTTTCTCCAATCTCCCATTTGATATAACCCCACTCATTAATAGCTC  
 TGTGGCTTACTAGAGCCGCTTCACCATCATTTAACACATCGTATCTTCTCTTATCGATGTGAATTGA  
 +  
 F:FFFFFFFFFFFFFFF:F:FFFFFFFFFFFFFFFFFFFFFFFFFFFFFFFFFFFFFFFFFFFFFFFFF:FFFFFFFFFFFFFFFF  
 FFFFFFFFFFFFFFFF:FFFFF:FFFFFFF,:F:FFFFFFFFFFFFFFFFFFFFFFFFF:FFFFFFF:FFFFFFFFFFFF,:FFF  
 @A00155:342:HHGFNDSXY:1:2420:32850:2988 1:N:0:GAACCTAG+TCCGCATA  
 TATCAGTAGGCATATTAAGTTTACTTTCTCCAATCTCCCATTTGATATAACCCCACTCATTAATAGCTC  
 TGTGGCTTACTAGAGCCGCTTCACCATCATTTAACACATCGTATCTTCTCTTATCGATGTGAATTGA  
 +  
 FFF:FFFFFFFFFFFFFFFFFFFFFFFFFFFFFFFFFFFFFFFFF:F:FFFFFFFFFFFFFFFFFFFFFFFFF:FFFFFFFFFFFFFFFF  
 FFFFFFFFFFFFFFFF:FFFFFFFFFFFF:FFFFFFFFF,FFFFFFFFF:FFFFFFFFFFFFFFFFF:FFFFFFFFFFFF  
 @A00155:342:HHGFNDSXY:1:1351:29206:20823 1:N:0:GAACCTAG+TCCGCATA  
 ATCAGTAGGCATATTAAGTTTACTTTCTCCAATCTCCCATTTGATATAACCCCACTCATTAATAGCTCT  
 GTGGCTTACTAGAGCCGCTTCACCATCATTTAACACATCGTATCTTCTCTTATCGATGTGAATTGAG  
 +  
 FFFFFFFFFFFFFFFFFFFFFFFFFFFFFFFFFFFFFFFFFFFFFFFFFFFFFFFFFFFFFFFFFFFFFFFFFF  
 FFFFFFFFFFFFFFFFFFFFFFFFFFFFFFFFFFFFFFFFFFFFFFFFFFFFFFFFFFFFFFFFFFFFFFFFFF,FFFFFFFFFFFFFFFF  
 @A00155:342:HHGFNDSXY:1:1351:28058:22310 1:N:0:GAACCTAG+TCCGCATA  
 ATCAGTAGGCATATTAAGTTTACTTTCTCCAATCTCCCATTTGATATAACCCCACTCATTAATAGCTCT  
 GTGGCTTACTAGAGCCGCTTCACCATCATTTAACACATCGTATCTTCTCTTATCGATGTGAATTGAG  
 +  
 FFFFFFFFFFFFFFFF:FFFFFFFFFFFFFFFFFFFFFFFFFFFFFFFFFFFFFFFFFFFFFFFFFFFFFFFFF  
 FFFFFFFFFFFFFFFFFFFFFFFFFFFFFFFFFFFFFFFFFFFFFFFFFFFFFFFFFFFFFFFFFFFFFFFFFF:FFFFFFFFF:FFFFFFFFFFFF  
 @A00155:342:HHGFNDSXY:1:2619:12671:24972 2:N:0:GAACCTAG+TCCGCATA  
 ATCAGTAGGCATATTAAGTTTACTTTCTCCAATCTCCCATTTGATATAACCCCACTCATTAATAGCTCT  
 GTGGCTTACTAGAGCCGCTTCACCATCATTTAACACATCGTATCTTCTCTTATCGATGTGAATTGAG  
 +  
 FFFFFF:FFFFFFF:FFFFFFFFFFFFFFFFFFFFFFFFFFFFFFFFFFFFFFFFFFFFFFFFFFFFF:FFFFFFFFFFFFFFFFFFFFF:FF  
 FFFFFFFFFFFFFFFFFFFFFFFFFFFFFFFFFFFFFFFFFFFFFFFFFFFFFFFFFFFFFFFFFFFFFFFFFF  
 @A00155:342:HHGFNDSXY:1:2218:21386:36933 2:N:0:GAACCTAG+TCCGCATA  
 ATCAGTAGGCATATTAAGTTTACTTTCTCCAATCTCCCATTTGATATAACCCCACTCATTAATAGCTCT  
 GTGGCTTACTAGAGCCGCTTCACCATCATTTAACACATCGTATCTTCTCTTATCGATGTGAATTGAG  
 +  
 FFFFF:FF:FF:FFFFF:FF:FFFF:FFFFFFFFFFFFFFFFFFFFFFFFFFFFFFFFFFFFFFFFF:FF:FFFFFFF  
 FFFFF:F:F:FFFFFFFFF:FFFFFFFFFFFFF:FFFFFFFFF:FFF:FFFFFFFFFFFFF:F:FFFF:FFF  
 @A00155:342:HHGFNDSXY:1:1128:9453:9126 2:N:0:GAACCTAG+TCCGCATA  
 AGTAGGCATATTAAGTTTACTTTCTCCAATCTCCCATTTGATATAACCCCACTCATTAATAGCTCTGTG  
 GCTTACTAGAGCCGCTTCACCATCATTTAACACATCGTATCTTCTCTTATCGATGTGAATTGAGGAT  
 +  
 FFFFFFFFFFFFFFFFFFFFF,FFFFFFFFFFFF:FFFFFFF:F,FFFFFFFFFFFFFFFFFFFFFFFFF:FFFFFFF:FFFFFFF  
 FFFFFFFFFFFFFFFFFFFFFFFFFFFFFFFFFFFFFFFFFFFFFFFFFFFFFFFFFFFFFFFFFFFFFFFFFF  
 @A00155:342:HHGFNDSXY:1:1539:18557:12305 2:N:0:GAACCTAG+TCCGCATA  
 AGTAGGCATATTAAGTTTACTTTCTCCAATCTCCCATTTGATATAACCCCACTCATTAATAGCTCTGTG

GCTTACTAGAGCCGCTTCACCATCATTTAACACATCGTATCTTCCTCTTATCGATGTGAATTGAGGAT  
+  
FFFFFFFFFFFFFFFF:FFFFFFFFFFFFFFFFFFFFFFFFFFFFFFFFFFFFFFFFFFFFFFFF  
FFFFFFFFFFFFFFFFFFFFFFFFFFFFFFFFFFFFFFFFFFFFFFFFFFFFFFFFFFFFFFFF  
@A00155:342:HHGFNDSXY:1:2469:28637:28729 2:N:0:GAACCTAG+TCCGCATA  
TAGGCATATTAAGTTTACTTTCTCCAATCTCCATTGATATAACCCCACTCATTAATAGCTCTGTGGC  
T TACTAGAGCCGCTTCACCATCATTTAACACATCGTATCTTCCTCTTATCGATGTGAATTGAGGATAC  
+  
FFFFFFFFFFFFFFFFFFFFFFFF:FFFFFFFFFFFFFFFF:FFFFFFFFFFFFFFFF  
FFFFFFFFFFFFFFFFFFFFFFFFFFFFFFFFFFFFFFFFFFFFFFFFFFFFFFFFFFFFFFFF  
@A00155:342:HHGFNDSXY:1:2550:4788:18928 1:N:0:GAACCTAG+TCCGCATA  
AGGCATATTAAGTTTACTTTCTCCAATCTCCATTGATATAACCCCACTCATTAATAGCTCTGTGGCT  
TACTAGAGCCGCTTCACCATCATTTAACACATCGTATCTTCCTCTTATCGATGTGAATTGAG  
+  
FFFF:FFFFFFFFFFFFFFFFFFFFFFFFFFFFFFFFFFFFFFFFFFFFFFFFFFFFFFFF  
FFFFFFFFFFFFFFFFFFFFFFFFFFFFFFFFFFFFFFFFFFFFFFFF:FFFF:,FFF:FFFF  
@A00155:342:HHGFNDSXY:1:1220:26847:2018 2:N:0:GAACCTAG+TCCGCATA  
GGCATATTAAGTTTACTTTCTCCAATCTCCATTGATATAACCCCACTCATTAATAGCTCTGTGGCTT  
ACTAGAGCCGCTTCACCATCATTTAACACATCGTATCTTCCTCTTATCGATGTGAATTGA  
+  
FFFF:FFFFFFFFFFFFFFFFFFFFFFFFFFFFFFFFFFFFFFFFFFFFFFFFFFFFFFFF  
FFFFFFFFFFFF:,FFFFFFFFFFFFFFFFFFFFFFFFFFFFFFFFFFFFFFFF:FFFFFFFFFFFF  
@A00155:342:HHGFNDSXY:1:2343:10312:20165 2:N:0:GAACCTAG+TCCGCATA  
GCATATTAAGTTTACTTTCTCCAATCTCCATTGATATAACCCCACTCATTAATAGCTCTGTGGCTTA  
CTAGAGCCGCTTCACCATCATTTAACACATCGTATCTTCCTCTTATCGATGTGAATTGAGGATACACC  
+  
FF:FFFFFFFFFFFFFFFFFFFFFFFFFFFFFFFFFFFFFFFFFFFFFFFFFFFFFFFF  
FFFFFFFFFFFF:FFFFFFFFFFFFFFFFFFFFFFFFFFFFFFFFFFFFFFFF:FFFFFFFFFFFF  
@A00155:342:HHGFNDSXY:1:1641:1524:4038 1:N:0:GAACCTAG+TCCGCATA  
CATATTAAGTTTACTTTCTCCAATCTCCATTGATATAACCCCACTCATTAATAGCTCTGTGGCTTAC  
TAGAGCCGCTTCACCATCATTTAACACATCGTATCTCCCTCTTATCGATGTGAATTGAGGATACA  
+  
FFFFFFFFFFFFFFFFFFFFFFFFFFFFFFFFFFFFFFFFFFFFFFFFFFFFFFFF  
FFFFFFFFFFFFFFFFFFFFFFFF:FFFF:FFFFFFFFFFFFFFFFFFFFFFFF:FFFF:F  
@A00155:342:HHGFNDSXY:1:2619:11270:29309 1:N:0:GAACCTAG+TCCGCATA  
CATATTAAGTTTACTTTCTCCAATCTCCATTGATATAACCCCACTCATTAATAGCTCTGTGGCTTAC  
TAGAGCCGCTTCACCATCATTTAACACATCGTATCTTCCTCTTATCGATGTGAATTGAGGATACACCA  
+  
FFFFFFFFFFFFFFFF:F:FFFFFFFFFFFFFFFF:FFFFFFFFFFFFFFFF:FFFFFFFF  
:FFFFFFFFFFFF,FFFF:FFFF:FFFF:FFFFFFFFFFFFFFFF,F:FFFF:FFFFFFFFFFFF  
@A00155:342:HHGFNDSXY:1:1128:9453:9126 1:N:0:GAACCTAG+TCCGCATA  
ATATTAAGTTTACTTTCTCCAATCTCCATTGATATAACCCCACTCATTAATAGCTCTGTGGCTTACT  
AGAGCCGCTTCACCATCATTTAACACATCGTATCTTCCTCTTATCGATGTGAATTGAGGATACACCAC  
+  
FFFFFFFFFFFFFFFFFFFFFFFFFFFFFFFFFFFFFFFFFFFFFFFFFFFFFFFF  
FFFFFFFFFFFFFFFFFFFFFFFFFFFFFFFFFFFFFFFFFFFFFFFFFFFFFFFF  
@A00155:342:HHGFNDSXY:1:2368:29414:11725 2:N:0:GAACCTAG+TCCGCATA  
TATTAAGTTTACTTTCTCCAATCTCCATTGATATAACCCCACTCATTAATAGCTCTGTGGCTTACTA  
GAGCCGCTTCACCATCATTTAACACATCGTATCTTCCTCTTATCGATGTGAATTGAGGATACACCACC  
+  
FFFFFF:FFFF:FFFF:FFFFFFFFFFFFFFFFFFFFFFFFFFFFFFFF  
FFFFFF:FFFFFFFFFFFFFFFFFFFFFFFFFFFFFFFFFFFFFFFF  
@A00155:342:HHGFNDSXY:1:1234:9037:14387 2:N:0:GAACCTAG+TCCGCATA  
TATTAAGTTTACTTTCTCCAATCTCCATTGATATAACCCCACTCATTAATAGCTCTGTGGCTTACTA

GAGCCGCTTCACCATCATTAAACACATCGTATCTTCTCTTATCGATGTGAATTGAGGATACACCACC  
+  
FFFFFFFFFFFFFFFFFFFFFFFFFFFFFFFFFFFFFFFFFFFFFFFFFFFFF, FFFFFFFFFF: FFFFFFFFFFFFFFFFFFFF  
FFFFFFFFFFFFFFFFFFFFFFFFFFFFFFFFFFFFFFFFFFFFFFFFFFFFF: FFFFFFFFFFFFFFFFFFFFFFFFFF  
@A00155:342:HHGFNDSXY:1:2263:20654:1939 2:N:0:GAACCTAG+TCCGCATA  
TATTAAGTTTACTTTCTCCAATCTCCCATTGATATAACCCCCACTCATTAATAGCTCTGTGGCTTACTA  
GAGCCGCTTCACCATCATTAAACACATCGTATCTTCTCTTATCGATGTGAATTGAGGATACACCACC  
+  
FFFFFFFFFFFFFFFFFFFFFF: FFFFFFFFFFFFFFFF: FFFFF, FFFFF, :: FFFFFFFFFF: FFFF:  
FFFFF: F, FFFFF, FFFFFFFFFF: FFFFFFF:, FFFF, : FFFFFFFFFF: FFFFFFFFFFFFFFFF  
@A00155:342:HHGFNDSXY:1:2646:14570:28573 2:N:0:GAACCTAG+TCCGCATA  
TTAAGTTTACTTTCTCCAATCTCCCATTGATATAACCCCCACTCATTAATAGCTCTGTGGCTTACTAGA  
GCCGCTTCACCATCATTAAACACATCGTATCTTCTCTTATCGATGTGAATTGAGGATACACCACCTT  
+  
FFFFF, FFFFFFFFF: FFFFFFFFFFFFFFF: : FF: FFFFFFFFFFFFFFFFFFFFFFFFFFFFFFFFFF  
FFFFFFFFFFFFFFFFFFFFFFFFFFFFFFFFFFFFFFFF, FFFFFFFFF: : FFFFFFFFFFFFFFFFFFFFFFFF: FFF:  
@A00155:342:HHGFNDSXY:1:1444:18114:24565 2:N:0:GAACCTAG+TCCGCATA  
TAAGTTTACTTTCTCCAATCTCCCATTGATATAACCCCCACTCATTAATAGCTCTGTGGCTTACTAGAG  
CCGCTTCACCATCATTTAACACATCGTATCTTCTCTTATCGATGTGAATTGAGGATACACCACCTTC  
+  
: FFFFF: FF: F: FFFFFFFFF: FFFFFFFFFFFFFFFFFFFFFFFFFFFFFFFFFF: FFFFFFF: FFFFFFFFFF  
FFFFFFFF: FFFFFFFFF: FFFFFFFFFFFFFFFFFFFFFFFFFFFFFFFFFF: FFFFFFFFFFFFFFFFFFFFFFFF  
@A00155:342:HHGFNDSXY:1:1512:16740:34898 2:N:0:GAACCTAG+TCCGCATA  
TTACTTTCTCCAATCTCCCATTGATATAACCCCCACTCATTAATAGCTCTGTGGCTTACTAGAGCCGCT  
TCACCATCATTTAACACATCGTATCTTCTCTTATCGATGTGAATTGAGGATACACCACCTTCC  
+  
FFFFFF: FFF: FFFFFFFFFFFFFFFFFFFFFFFF, FFFFFFFFFF: FFFFF: F: FFF: FFFFFFFFFF  
FF: FFFFFFFFFFFFFFFFFFFFFFFFFFFFFFFFFF: F: FFFFFFFFFFFFFFFFFF  
@A00155:342:HHGFNDSXY:1:2101:26006:13996 2:N:0:GAACCTAG+TCCGCATA  
ACTTTCTCCAATCTCCCATTGATATAACCCCCACTCATTAATAGCTCTGTGGCTTACTAGAGCCGCTTC  
ACCATCATTTAACACATCGTATCTTCTCTTATCGATGTGAATTGAGGATACACCACCT  
+  
FFF: FFFF: FFFFFFFFFFFFFFFFFFFFFFFFFFFFFFFFFF: FFFFFFFFF: FFFFFFFFFFFFFFFFFF  
FFFFFFFFFFFFFFFFFFFFFFFFFFFFFFFFFFFFFFFFFFFFFFFFFFFFFFFFF  
@A00155:342:HHGFNDSXY:1:2623:3414:24345 1:N:0:GAACCTAG+TCCGCATA  
ACTTTCTCCAATCTCCCATTGATATAACCCCCACTCATTAATAGCTCTGTGGCTTACTAGAGCCGCTTC  
ACCATCATTTAACACATCGTATCTTCTCTTATCGATGTGAATTGAGGATACACCACCTTCCAATCCA  
+  
FFFFFFFFFFFFFFFFFFFFFFFFFFFFFFFFFFFFFFFFFFFFFFFFFFFFFFFFF  
FFFFFFFFFFFFFFFFFFFFFFFFFFFFFFFFFFFFFFFF: FFFFFFF: FFFF, FFFFFFFFFFFFFFFFFF, F  
@A00155:342:HHGFNDSXY:1:1325:18186:6433 2:N:0:GAACCTAG+TCCGCATA  
CTTTCTCCAATCTCCCATTGATATAACCCCCACTCATTAATAGCTCTGTGGCTTACTAGAGCCGCTTCA  
CCATCATTTAACACATCGTATCTTCTCTTATCGATGTGAATTGAGGATACACCACCTT  
+  
FFFFFFFFF, FFFFF: FFFFF: FFFFFFFFFFFFFFFFFFFFFFFFFFFFFFFFFF  
FFFFFFFF: FFFFFFFFFFFFFFFFFFFFFFFFFF: FFFFFFFFFFFFFFFFFF  
@A00155:342:HHGFNDSXY:1:1455:3134:7639 2:N:0:GAACCTAG+TCCGCATA  
CTTTCTCCAATCTCCCATTGATATAACCCCCACTCATTAATAGCTCTGTGGCTTACTAGAGCCGCTTCA  
CCATCATTTAACACATCGTATCTTCTCTTATCGATGTGAATTGAGGATACACCACCTT  
+  
FFFFFF: FFF: FFFFFFFFFFFFFFFFFFFFFFFFFF: FF: FFFFFFFFFFFFFFFFFFFFFFFFFF  
FFFFFFFFFFFFFFFFFFFFFFFFFFFFFFFF: FFFFFFF: FFFFFFFFFFFFFFFFFF  
@A00155:342:HHGFNDSXY:1:1220:26847:2018 1:N:0:GAACCTAG+TCCGCATA  
CTTTCTCCAATCTCCCATTGATATAACCCCCACTCATTAATAGCTCTGTGGCTTACTAGAGCCGCTTCA

CCATCATTTAACACATCGTATCTTCCTCTTATCGATGTGAATTGAGGATACACCACCTTC  
+  
FFFFFFFFFFFFFFFFFFFFFFFFFFFFFFFFFFFFFFFFFFFFFFFFFFFFFFFFFFFFFFFFFFFFFFFF  
FFFFFFF:FFFFFFFFFFFFFFFFFFFFFFFFFFFFFFFFFFFFFFFFFFFFFFFFFFFFFFFFFFFFFFFF  
@A00155:342:HHGFNDSXY:1:2263:20654:1939 1:N:0:GAACCTAG+TCCGCATA  
CTTTCTCCAATCTCCCATTGATATAACCCCACTCATTAATAGCTCTGTGGCTTACTAGAGCCGCTTCA  
CCATCATTTAACACATCGTATCTTCCTCTTATCGATGTGAATTGAGGATACACCACCTTCCAATCCAT  
+  
FFFFFFFFFFFFFFFFFFFFFFFFFFFFFFFFFFFFFFFFFFFFFFFFFFFFFFFFFFFFFFFFFFFFFFFF  
FFFFFFFFFFFFFFFFFFFFFFFFFFFFFFFFFFFFFFFFFFFFFFFFFFFFFFFFFFFFFFFFFFFFFFFF  
@A00155:342:HHGFNDSXY:1:2409:5086:37043 1:N:0:GAACCTAG+TCCGCATA  
CTTTCTCCAATCTCCCATTGATATAACCCCACTCATTAATAGCTCTGTGGCTTACTAGAGCCGCTTCA  
CAATCATTTAACACATCGTATCTTCCTCTTATCGATGTGAATTGAGGATACACCACCTTCCAATCCAT  
+  
FFFFFFFFFFFFFFFFFFFFFFFFFFFFFFFFFFFFFFFFFFFFFFFFFFFFFFFFFFFFFFFFFFFFFFFF  
F,FFFFFFFFFFFFFFFFFFFFFFFFFFFFFFFFFFFFFFFFFFFFFFFFFFFFFFFFFFFFFFFFFFFF  
@A00155:342:HHGFNDSXY:1:2410:5493:1047 1:N:0:GAACCTAG+TCCGCATA  
CTTTCTCCAATCTCCCATTGATATAACCCCACTCATTAATAGCTCTGTGGCTTACTAGAGCAGCTTCA  
CCATCATTTAACACATCGTATCTTCCTCTTATCGATGTGAATTGAGGATACACCACCTTCCAATCCAT  
+  
FFFFFFF:FFFFF,FFF,FFFFFFFFF,:FF::FFFFFFFFFFFFF:::FFFFFFFFFFFF:F,,FFFF  
FFFFFFF:F,FFFFFFFFFFFFFFFF:FF,:FFFFF:,FFFFF:FFFFFFFFFFFFFFFF:FFF:FFFF,FF  
@A00155:342:HHGFNDSXY:1:1463:5746:14606 1:N:0:GAACCTAG+TCCGCATA  
CTTTCTCCAATCTCCCATTGATATAACCCCACTCATTAATAGCTCTGTGGCTTACTAGAGCCGCTTCA  
CCATCATTTAACACATCGTATCTTCCTCTTATCGATGTGAATTGAGGATACACCACCTTCCAATCCAT  
+  
FFFFFFFFFFFFFFFFFFFFFFFFFFFFFFFFFFFFFFFFFFFFFFFFFFFFFFFFFFFFFFFFFFFFFFFF  
FFFFFFFFFFFFFFFFFFFFFFFFFFFFFFFFFFFFFFFFFFFFFFFFFFFFFFFFFFFFFFFFFFFFFFFF  
@A00155:342:HHGFNDSXY:1:1650:14253:29935 1:N:0:GAACCTAG+TCCGCATA  
CTTTCTCCAATCTCCCATTGATATAACCCCACTCATTAATAGCTCTGTGGCTTACTAGAGCCGCTTCA  
CCATCATTTAACACATCGTATCTTCCTCTTATCGATGTGAATTGAGGATACACCACCTTCCAATCCAT  
+  
FFFFFFFFFFFFFFFFFFFFFFFFFFFFFFFFFFFFFFFFFFFFFFFFFFFFFFFFFFFFFFFFFFFFFFFF  
FFFFFFF:FFFFFFFFFFFFFFFFFFFFFFFFFFFFFFFFFFFFFFFFFFFFFFFFFFFFFFFFFFFFFFFF  
@A00155:342:HHGFNDSXY:1:1234:9037:14387 1:N:0:GAACCTAG+TCCGCATA  
CTTTCTCCAATCTCCCATTGATATAACCCCACTCATTAATAGCTCTGTGGCTTACTAGAGCCGCTTCA  
CCATCATTTAACACATCGTATCTTCCTCTTATCGATGTGAATTGAGGATACACCACCTTCCAATCCAT  
+  
FFFFFFFFFFFFFFFFFFFFFFFFFFFFFFFFFFFFFFFFFFFFFFFFFFFFFFFFFFFFFFFFFFFFFFFF  
FFFFFFFFFFFFFFFFFFFFFFFFFFFFFFFFFFFFFFFFFFFFFFFFFFFFFFFFFFFFFFFFFFFFFFFF  
@A00155:342:HHGFNDSXY:1:2565:25238:31015 1:N:0:GAACCTAG+TCCGCATA  
CTTTCTCCAATCTCCCATTGATATAACCCCACTCATTAATAGCTCTGTGGCTTACTAGAGCCGCTTCA  
CCATCATTTAACACATCGTATCTTCCTCTTATCGATGTGAATTGAGGATACACCACCTTCCAATCCAT  
+  
FFFFFFFFFFFFFFFFFFFFFFFFFFFFFFFFFFFFFFFFFFFFFFFFFFFFFFFFFFFFFFFFFFFFFFFF  
FFFFFFFFFFFFFFFFFFFFFFFFFFFFFFFFFFFFFFFFFFFFFFFFFFFFFFFFFFFFFFFFFFFFFFFF  
@A00155:342:HHGFNDSXY:1:1331:6822:3474 1:N:0:GAACCTAG+TCCGCATA  
CTTTCTCCAATCTCCCATTGATATAACCCCACTCATTAATAGCTCTGTGGCTTACTAGAGCCGCTTCA  
CCATCATTTAACACATCGTATCTTCCTCTTATCGATGTGAATTGAGGATACACCACCTTCCAATCCAT  
+  
FFFFFFFFFFFFFFFFFFFFFFFFFFFFFFFFFFFFFFFFFFFFFFFFFFFFFFFFFFFFFFFFFFFFFFFF  
FFFFFFFFFFFFFFFFFFFFFFFFFFFFFFFFFFFFFFFFFFFFFFFFFFFFFFFFFFFFFFFFFFFFFFFF  
@A00155:342:HHGFNDSXY:1:2368:29414:11725 1:N:0:GAACCTAG+TCCGCATA  
CTTTCTCCAATCTCCCATTGATATAACCCCACTCATTAATAGCTCTGTGGCTTACTAGAGCCGCTTCA



CCATCATTTAACACATCGTATCTTCCTCTTATCGATGTGAATTGAGGATACACCACCTTCCAATCCAT  
+  
FFFFFFFFFFFFFFFFFFFFFFFFFFFFFFFFFFFFFFFFFFFFFFFFFFFFFFFFFFFFFFFFFFFFFFFFFFFFFFFF:FFFFFFFF  
FFFFFFFFFFFFFFFFFFFFFFFFFFFFFFFFFFFFFFFFFFFFFFFFFFFFFFFFFFFFFFFFFFFFFFFFFFFFFFFFFFFFFFFF  
@A00155:342:HHGFNDSXY:1:2240:31141:28526 1:N:0:GAACCTAG+TCCGCATA  
CTTTCTCCAATCTCCCATTGATATAACCCCACTCATTAATAGCTCTGTGGCTTACTAGAGCCGCTTCA  
CCATCATTTAACACATCGTATCTTCCTCTTATCGATGTGAATTGAGGATACACCACCTTCCAATCCAT  
+  
FFFFFFFFFFFFFFFFFFFFFFFFFFFFFFFFFFFFFFFFFFFFFFFFFFFFFFFFFFFFFFFFFFFFFFFFFFFFFFFF:FFFFFFF  
FFF:FFFFFFFFFFFFFFFFFFFFFFFFFFFFFFFFFFFFFFFFFFFFFFFFFFFFFFFFFFFFFFFFFFFFFFFFFFFFFFFF:FFFFFFFF  
@A00155:342:HHGFNDSXY:1:2108:22128:6464 1:N:0:GAACCTAG+TCCGCATA  
CTTTCTCCAATCTCCCATTGATATAACCCCACTCATTAATAGCTCTGTGGCTTACTAGAGCCGCTTCA  
CCATCATTTAACACATCGTATCTTCCTCTTATCGATGTGAATTGAGGATACACCACCTTCCAATCCAT  
+  
FFFFFFFFFFFFFFFFFFFFFFFFFFFFFFFFFFFFFFFFFFFFFFFFFFFFFFFFFFFFFFFFFFFFFFFFFFFFFFFF:FFFFFFFFFFFFFFFF  
FFFFFFFFFFFFFFFFFFFFFFFFF,F:FFFF:FFFFFFFFFFFFFFFFFFFFFFFFFFFFFFFFFFFFFFFFFFFFFFFFFFFFFFFFF:  
@A00155:342:HHGFNDSXY:1:2221:18900:35978 1:N:0:GAACCTAG+TCCGCATA  
TTTCTCCAATCTCCCATTGATATAACCCCACTCATTAATAGCTCTGTGGCTTACTAGAGCCGCTTCAC  
CATCATTTAACACATCGTATCTTCCTCTTATCGATGTGAATTGAGGATACACCACCTTCCAATCCATC  
+  
FFFFFFFFFFFFF,FFFFFF:FFFFFFFFF:FFFFFFFFFFFFF:FFFFFFFFF:FFFF:FF:FFFFFFFFFFFFF  
FF:FFF,FFFFFFFFF:FFFFFFFFFFFFFFFFF:FFF:F:FF:FFFFFFFFFFFFFFFFF:FFFFFFFFFFFFF:  
@A00155:342:HHGFNDSXY:1:1422:14841:10974 2:N:0:GAACCTAG+TCCGCATA  
TTCTCCAATCTCCCATTGATATAACCCCACTCATTAATAGCTCTGTGGCTTACTAGAGCCGCTTCACC  
ATCATTTAACACATCGTATCTTCCTCTTATCGATGTGAATTGAGGATACACCACCTTCCAATCCATCT  
+  
FFFF: :FFFFFF:FFFFFFFFFFFFFFFFF:FFFFFFFFFFFFFFFFFFFFFFFFFFFFFFFFFFFFFFFFFFFFFFFFF  
FFFFFFFFFFFFF,FFFFFFFFFFFFFFFFF:FFFFFFFFFFFFFFFFFFFFF: :F:FFFFFFFFFFFFFFFFFFFFF  
@A00155:342:HHGFNDSXY:1:2508:13548:2472 1:N:0:GAACCTAG+TCCGCATA  
TTCTCCAATCTCCCATTGATATAACCCCACTCATTAATAGCTCTGTGGCTTACTAGAGCCGCTTCACC  
ATCATTTAACACATCGTATCTTCCTCTTATCGATGTGAATTGAGGATACACCACCTTCCAATCCATCT  
+  
FFFFFFFFFFFFFFFFFFFFFFFFFFFFFFFFFFFFFFFFFFFFFFFFFFFFFFFFFFFFFFFFFFFFFFFFFFFFFFFFF  
FFFFFFFFFFFFFFFFFFFFFFFFFFFFFFFFFFFFFFFFFFFFFFFFFFFFFFFFFFFFFFFFFFFFFFFFFFFFFFFFF  
@A00155:342:HHGFNDSXY:1:2516:32868:28040 1:N:0:GAACCTAG+TCCGCATA  
TCTCCAATCTCCCATTGATATAACCCCACTCATTAATAGCTCTGTGGCTTACTAGAGCCGCTTCACCA  
TCATTTAACACATCGTATCTTCCTCTTATCGATGTGAATTGAGGATACACCACCTTCCAATCCATCTG  
+  
FFFFFFFFFFFFFFFFFFFFFFFFFFFFFFFFF:FFFFFF:F:FFFFF:FFFFFFFFFFFFFFFFF:FFFFFFFFFFFFF  
FFFFFFFFFFFFFFFFFFFFFFFFFFFFFFFFFFFFFFFFFFFFFFFFF:FFFFFFFFFFFFFFFFFFFFFFFFFFFFF,FFFFFF  
@A00155:342:HHGFNDSXY:1:1338:11342:14497 2:N:0:GAACCTAG+TCCGCATA  
CTCCAATCTCCCATTGATATAACCCCACTCATTAATAGCTCTGTGGCTTACTAGAGCCGCTTCACCAT  
CATTTAACACATCGTATCTTCCTCTTATCGATGTGAATTGAGGATACACCACCTTCCAATCCATCTG  
+  
FF,FFFFFFFF:FFFFFFFFFFFFFFFFFFFFFFFFFFFFFFFFFFFFFFFFFFFFFFFFFFFFFFFFFFFFFFFFF  
FFFFFFFFFFFFFFFFFFFFFFFFFFFFFFFFF:FF:FFFFFFFFFFFFFFFFFFFFFFFFFFFFFFFFFFFFFFFFF  
@A00155:342:HHGFNDSXY:1:2607:25156:29559 2:N:0:GAACCTAG+TCCGCATA  
CTCCAATCTCCCATTGATATAACCCCACTCATTAATAGCTCTGTGGCTTACTAGAGCCGCTTCACCAT  
CATTTAACACATCGTATCTTCCTCTTATCGATGTGAATTGAGGATACACCACCTTCCAATCCATCTGC  
+  
:FFFF:FFFFFFFFFFFFFFFFF:FFFFFFFFFFFFF:FFFFFFFFFFFFFFFFFFFFFFFFFFFFFFFFFFFFFFFFF  
FFFFFFFFFFFFFFFFFFFFF:FFFFFFFFFFFFFFFFFFFFFFFFFFFFFFFFFFFFFFFFFFFFFFFFFFFFFFFFF  
@A00155:342:HHGFNDSXY:1:2240:31141:28526 2:N:0:GAACCTAG+TCCGCATA  
CTCCAATCTCCCATTGATATAACCCCACTCATTAATAGCTCTGTGGCTTACTAGAGCCGCTTCACCAT

CATTTAACACATCGTATCTTCCTCTTATCGATGTGAATTGAGGATACACCACCTTCCAATCCATCTGC  
+  
FFFFFFFFF:FFFFFFFF:FFFFFFFFFFFF:FFFFFFFFFFFFFFFFFFFFFFFFFFFFFFFFF  
FFFFFFFFFFFFFFFFFFFFFFFFF:FFFFFFFFFFFFF:F:FFFFFFFFFFFFFFFFFFFFF  
@A00155:342:HHGFNDSXY:1:2269:2998:30044 1:N:0:GAACCTAG+TCCGCATA  
TCCAATCTCCATTGATATAACCCCACTCATTAATAGCTCTGTGGCTTACTAGAGCCGCTTCACCATC  
ATTTAACACATCGTATCTTCCTCTTATCGATGTGAATTGAGGATACACCACCTTCCAATCCATCTGCA  
+  
FFFFFFF:FFFFFFFFFFFF:FFFFFFFFFFFF:FFFFFFFFFFFFFFFFFFFFFFFFFFFFFFFFF:F  
FFFFFFFFFFFFFFFFFFFFFFFFF:FFFFFFFFFFFFFFFFFFFFFFFFFFFFFFFFF:FFFFFFF  
@A00155:342:HHGFNDSXY:1:1167:16324:8500 2:N:0:GAACCTAG+TCCGCATA  
CAATCTCCATTGATATAACCCCACTCATTAATAGCTCTGTGGCTTACTAGAGCCGCTTCACCATCAT  
TTAACACATCGTATCTTCCTCTTATCGATGTGAATTGAGGATACACCACCTTCCAATCC  
+  
FFFFFFFFF:FFFFFFFFFFFF:FFFFFFFFFFFF:FFFFFFFFFFFFFFFFFFFFFFFFFFFFFFFFF:F:FFFFFFFFF  
FFFFFFFFFFFFFFFFFFFFFFFFF:FFFFFFFFFFFFFFFFFFFFFFFFFFFFFFFFF:FFFFFFF  
@A00155:342:HHGFNDSXY:1:2653:8585:5807 1:N:0:GAACCTAG+TCCGCATA  
TCTCCATTGATATAACCCCACTCATTAATAGCTCTGTGGCTTACTAGAGCCGCTTCACCATCATTTA  
ACACATCGTATCTTCCTCTTATCGATGTGAATTGAGGATACACCACCTTCCAATCCATCTGCAGCCAC  
+  
FFFFFFFFFFFFFFFFFFFFFFFFFFFFFFFFFFFFFFFFFFFFFFFFFFFFFFFFFFFFFFFFFFFFF  
FFFFFFFFFFFFFFFFFFFFFFFFF:F,FFFFFFFFFFFFFFFFFFFFFFFFFFFFFFFFFFFFF:FF  
@A00155:342:HHGFNDSXY:1:2223:20500:8124 2:N:0:GAACCTAG+TCCGCATA  
TCTCCATTGATATAACCCCACTCATTAATAGCTCTGTGGCTTACTAGAGCCGCTTCACCATCATTTA  
ACACATCGTATCTTCCTCTTATCGATGTGAATTGAGGATACACCACCTTCCAATCCATCTGCAGCCAC  
+  
FFFFFFFFFFFF:FFFFFFFFFFFF:FF:FFFF:FFFFFFFFFFFFFFFFFFFFFFFFF,FFFFFFFFFFFF  
FFFF,F::FFFFFFFFFFFF,FFFF:FFFFFFFFFFFFFFFFFFFFFFFFFFFFFFFFFFFFF:FFFFFFFFF,F  
@A00155:342:HHGFNDSXY:1:2101:26006:13996 1:N:0:GAACCTAG+TCCGCATA  
CCATTGATATAACCCCACTCATTAATAGCTCTGTGGCTTACTAGAGCCGCTTCACCATCATTTAACAC  
ATCGTATCTTCCTCTTATCGATGTGAATTGAGGATACACCACCTTCCAATCCATCTGCA  
+  
FFFFFFFFFFFF:FFFFFFFFFFFFFFFFFFFFFFFFFFFFFFFFFFFFFFFFFFFFFFFFFFFFFFFFFFFFF  
FFFFFFFFFFFFFFFFFFFFFFFFF:FFFFFFFFFFFFFFFFFFFFFFFFFFFFFFFFFFFFF  
@A00155:342:HHGFNDSXY:1:1325:18186:6433 1:N:0:GAACCTAG+TCCGCATA  
CATTGATATAACCCCACTCATTAATAGCTCTGTGGCTTACTAGAGCCGCTTCACCATCATTTAACACA  
TCGTATCTTCCTCTTATCGATGTGAATTGAGGATACACCACCTTCCAATCCATCTGCAG  
+  
FFFFFFFFFFFFFFFFFFFFFFFFFFFFFFFFFFFFFFFFFFFFFFFFFFFFFFFFFFFFFFFFFFFFF::FFFF:FFF  
FFFFFFFFFFFFFFFFFFFFFFFFF:FFFFFFFFFFFFFFFFFFFFFFFFFFFFFFFFFFFFF  
@A00155:342:HHGFNDSXY:1:1455:3134:7639 1:N:0:GAACCTAG+TCCGCATA  
CATTGATATAACCCCACTCATTAATAGCTCTGTGGCTTACTAGAGCCGCTTCACCATCATTTAACACA  
TCGTATCTTCCTCTTATCGATGTGAATTGAGGATACACCACCTTCCAATCCATCTGCAG  
+  
FFFFFFFFFFFFFFFFFFFFFFFFFFFFFFFFFFFFFFFFFFFFFFFFFFFFFFFFFFFFFFFFFFFFF:FFFF  
FFFFFFFFFFFFFFFFFFFFFFFFF:FFFFFFFFFFFFFFFFFFFFFFFFFFFFFFFFFFFFF:F  
@A00155:342:HHGFNDSXY:1:1602:5737:31563 1:N:0:GAACCTAG+TCCGCATA  
CATTGATATAACCCCACTCATTAATAGCTCTGTGGCTTACTAGAGCCGCTTCACCATCATTTAACACA  
TCGTATCTTCCTCTTATCGATGTGAATTGAGGATACACCACCTTCCAATCCATCTGCAGCCACACGCA  
+  
FFFFFFFFFFFFFFFFFFFFFFFFF:FFFFF,FFFFFFFFF:FF,FFFFFFFFFFFFFFFFF:FFF:FFFFFFF  
FFFFFFFFFFFFFFFFF:FF:FFFFFFFFFFFFFFFFFFFFF:FF:FFFFFFFFFFFFFFFFFFFFF:FFFFF  
@A00155:342:HHGFNDSXY:1:2604:27281:8625 1:N:0:GAACCTAG+TCCGCATA  
CATTGATATAACCCCACTCATTAATAGCTCTGTGGCTTACTAGAGCCGCTTCACCATCATTTAACACA

TCGTATCTTCCTCTTATCGATGTGAATTGAGGATACACCACCTTCCAATCCATCTGCAGCCACACGCA  
+  
FFFFFFFFFFFFFFFFFFFFFFFFFFFFFFFFFFFFFFFFFFFFFFFFFFFFFFFFFFFFFFFFFFFFFFFF  
FFFFFFFFFFFFFFFFFFFFFFFFFFFFFFFFFFFFFFFFFFFFFFFFFFFFFFFFFFFFFFFFFFFFFFFF:FFFFFF  
@A00155:342:HHGFNDSXY:1:1338:11342:14497 1:N:0:GAACCTAG+TCCGCATA  
GATATAACCCCACTCATTAATAGCTCTGTGGCTTACTAGAGCCGCTTCACCATCATTTAACACATCGT  
ATCTTCCTCTTATCGATGTGAATTGAGGATACACCACCTTCCAATCCATCTGCAGCCACACGCATGC  
+  
FFFFFFFFFFFFFFFFFFFFFFFFFFFFFFFFFFFFFFFFFFFFFFFFFFFFFFFFFFFFFFFFFFFFFFFF:FFFFFFF:FFFFFFFFFFFFF  
FFFFFFFFF,FFFFFFFFFFFFFFFFFFFFFFFFFFFFFFFFFFFFFFFFFFFFFFFFFFFFFFFFFFFFFFFF,FFFFFFFFF  
@A00155:342:HHGFNDSXY:1:2374:2510:28573 1:N:0:GAACCTAG+TCCGCATA  
GATATAACCCCACTCATTAATAGCTCTGTGGCTTACTAGAGCCGCTTCACCATCATTTAACACATCGT  
ATCTTCCTCTTATCGATGTGAATTGAGGATACACCACCTTCCAATCCATCTGCAGCCACACGCATGCT  
+  
F,FFFFFFFFFFFFFFFFFFFFFFFF,FF,,FFFFFFFFFFFFFFFFFFFFFFFFFFFFFFFFFFFFFFFF:FFFFFFF::FF  
FFFF,FFFFF,FFFFFF:,FFFFF:FFFFFFFFF,FFFFFFFF:F:F,FFFFFFFFFFFFFFFFFFFFFFFF:F::FF  
@A00155:342:HHGFNDSXY:1:1118:1497:26256 1:N:0:GAACCTAG+TCCGCATA  
GATATAACCCCACTCATTAATAGCTCTGTGGCTTACTAGAGCCGCTTCACCATCATTTAACACATCGT  
ATCTTCCTCTTATCGATGTGAATTGAGGATACACCACCTTCCAATCCATCTGCAGCCACACGCATGCT  
+  
F,FFFFFFFFFFFFFFFF:FFFFFFF:FFFFFFF,FFFFFFFFF:F:F,F,FFFF:,FFF:FFFFFFFFFFFFF  
FFFFFFF,FFFFFFFF:FFFFF:FFFFFFFFFFFF:FF,FFFFFFFF:FFFFFFF:FFFFFFFFFFFFFFFF:FFFF  
@A00155:342:HHGFNDSXY:1:1467:1551:28980 1:N:0:GAACCTAG+TCCGCATA  
GATATAACCCCACTCATTAATAGCTCTGTGGCTTACTAGAGCCGCTTCACCATCATTTAACACATCGT  
ATCTTCCTCTTATCGATGTGAATTGAGGATACACCACCTTCCAATCCATCTGCAGCCACACGCATGCT  
+  
F:FFF:FFFFFFFFFFFFFFFFFFFF,FFFFFFFFFFFFFFFFFFFFFFFFFFFFFFFFFFFF,FF:FFFFF:FFFFFFF  
FFFFFFFFFFFFFFFFFFFFFFFFFFFF,FFFFFFFFFFFF:FFFFFFFFFFFF:FFFFFFFFFFFF:FFFFFFFF:FFFF  
@A00155:342:HHGFNDSXY:1:1569:24867:9580 1:N:0:GAACCTAG+TCCGCATA  
GATATAACCCCACTCATTAATAGCTCTGTGGCTTACTAGAGCCGCTTCACCATCATTTAACACATCGT  
ATCTTCCTCTTATCGATGTGAATTGAGGATACACCACCTTCCAATCCATCTGCAGCCACACGCATGCT  
+  
FFFFFFFFFFFFFFFFFFFFFFFFFFFFFFFFFFFFFFFFFFFFFFFFFFFFFFFFFFFFFFFFFFFFFFFF  
FFFFFFFFFFFFFFFFFFFFFFFFFFFFFFFFFFFFFFFFFFFFFFFFFFFFFFFFFFFFFFFFFFFFFFFF  
@A00155:342:HHGFNDSXY:1:2223:20500:8124 1:N:0:GAACCTAG+TCCGCATA  
GATATAACCCCACTCATTAATAGCTCTGTGGCTTACTAGAGCCGCTTCACCATCATTTAACACATCGT  
ATCTTCCTCTTATCGATGTGAATTGAGGATACACCACCTTCCAATCCATCTGCAGCCACACGCATGCT  
+  
FFFFFFFFFFFFFFFFFFFFFFFFFFFFFFFFFFFFFFFFFFFFFFFFFFFFFFFFFFFFFFFFFFFFFFFF  
,FFFFFFFFFFFFFFFFFFFFFFFFFFFFFFFFFFFFFFFFFFFFFFFFFFFFFFFFFFFFFFFFFFFFFFFF  
@A00155:342:HHGFNDSXY:1:1632:32560:11882 1:N:0:GAACCTAG+TCCGCATA  
GATATAACCCCACTCATTAATAGCTCTGTGGCTTACTAGAGCCGCTTCACCATCATTTAACACATCGT  
ATCTTCCTCTTATCGATGTGAATTGAGGATACACCACCTTCCAATCCATCTGCAGCCACACGCATGCT  
+  
FFFFFFFFFFFFFFFFFFFFFFFFFFFFFFFFFFFFFFFFFFFFFFFFFFFFFFFFFFFFFFFFFFFFFFFF  
:FFFFFFFFF:FFFFFFFFFFFFFFFFFFFFFFFFFFFFFFFFFFFFFFFFFFFFFFFFFFFFFFFFFFFFFFFF:F  
@A00155:342:HHGFNDSXY:1:2215:24397:22200 1:N:0:GAACCTAG+TCCGCATA  
GATATAACCCCACTCATTAATAGCTCTGTGGCTTACTAGAGCCGCTTCACCATCATTTAACACATCGT  
ATCTTCCTCTTATCGATGTGAATTGAGGATACACCACCTTCCAATCCATCTGCAGCCACACGCATGCT  
+  
FFFFFFFFFFFFFFFFFFFFFFFFFFFFFFFFFFFFFFFFFFFFFFFFFFFFFFFFFFFFFFFFFFFFFFFF  
FFFFFFFFFFFFFFFFFFFFFFFFFFFFFFFFFFFFFFFFFFFFFFFFFFFFFFFFFFFFFFFFFFFFFFFF  
@A00155:342:HHGFNDSXY:1:2348:13494:20917 1:N:0:GAACCTAG+TCCGCATA  
GATATAACCCCACTCATTAATAGCTCTGTGGCTTACTAGAGCCGCTTCACCATCATTTAACACATCGT

ATCTTCTCTTATCGATGTGAATTGAGGATACACCACCTTCCAATCCATCTGCAGCCACACGCATGCT  
+  
FFFF:FFF:FFFFFF:FFFFFFFFFFFFFFFFFFFFFFFFFFFFFFFFFFFFFFFF:FFFFFFFFFFFFFFFFFFFFFFFF, F:FFF  
FFFFFFFF: F:FFF, FFFFFFFFFFFFFFFFFFFFFFFFFFFFFFFFFFFFFFFFFF:FFFFF, FFFF, FF:FFF: F:FFFFFFFFFFFFFFFF  
@A00155:342:HHGFNDSXY:1:1577:11912:27320 1:N:0:GAACCTAG+TCCGCATA  
ATATAACCCCACTCATTAATAGCTCTGTGGCTTACTAGAGCCGCTTCACCATCATTTAACACATCGTA  
TCTTCTCTTATCGATGTGAATTGAGGATACACCACCTTCCAATCCATCTGCAGCCACACGCATGCT  
+  
FFF, FF:FFFF:FFF:FFFFFFFFFFFFFFFFFFFFFFFFFFFFFFFFFFFFFFFF:FFFF, FFFFFFFFFF  
FFFFFFFF: F:F, FFFFFFFFFFFFFFFFFFFFFFFFFF, F:FFFFFFFFFFFFFFFFFFFFFFFF:FFF  
@A00155:342:HHGFNDSXY:1:1577:11912:27320 2:N:0:GAACCTAG+TCCGCATA  
TATAACCCCACTCATTAATAGCTCTGTGGCTTACTAGAGCCGCTTCACCATCATTTAACACATCGTAT  
CTTCTCTTATCGATGTGAATTGAGGATACACCACCTTCCAATCCATCTGCAGCCACACGCATGCTTC  
+  
FFFFFFFF, FF, FFF, FFFF:FF:F:F:FFFFFFFFFFFFFFFF: , FFFFFFF, FFFFFFF:FF::FFFF  
:FF, FFFF:FFFFFFFF, FFFFFFFFFFFFFFFFFFFFFFFFFF:FF:FFFFFF, :FFFFFFFF  
@A00155:342:HHGFNDSXY:1:1167:16324:8500 1:N:0:GAACCTAG+TCCGCATA  
ATAACCCCACTCATTAATAGCTCTGTGGCTTACTAGAGCCGCTTCACCATCATTTAACACATCGTATC  
TCTCTTATCGATGTGAATTGAGGATACACCACCTTCCAATCCATCTGCAGCCACACG  
+  
FFFFFFFFFFFFFF:FFFFFFFFFFFFFF, FFFFFFFFFFFFFFFFFFFFFFFFFFFFFFFFFF  
FFFFFFFFFFFFFFFFFFFFFFFF:FFFFFFFFFFFFFFFFFFFFFFFFFFFFFFFF  
@A00155:342:HHGFNDSXY:1:1544:30969:23124 2:N:0:GAACCTAG+TCCGCATA  
ACCCCACTCATTAATAGCTCTGTGGCTTACTAGAGCCGCTTCACCATCATTTAACACATCGTATCTTC  
CTCTTATCGATGTGAATTGAGGATACACCACCTTCCAATCCATCTGCAGCCACACGCATGCTTCCGCC  
+  
FFFFFFFFFFFFFFFFFFFFFFFFFFFFFFFFFFFFFFFF:FFFFFFFFFF:FFFFFFFF:FFFF:FF  
FFFF::FFFFFFFFFFFFFFFF:FFFFFF, FF:FFFFFFFFFFFFFFFF:FFFFFFFFFFFFFFFF:FFFF  
@A00155:342:HHGFNDSXY:1:1331:6822:3474 2:N:0:GAACCTAG+TCCGCATA  
ACCCCACTCATTAATAGCTCTGTGGCTTACTAGAGCCGCTTCACCATCATTTAACACATCGTATCTTC  
CTCTTATCGATGTGAATTGAGGATACACCACCTTCCAATCCATCTGCAGCCACACGCATGCTTCCGCC  
+  
FFFFFFFFFFFFFFFFFFFFFFFFFFFFFFFFFFFFFFFFFFFFFFFFFFFFFFFFFFFFFFFFFFFFFFFF  
FFFFFFFFFFFFFFFFFFFFFFFFFFFFFFFF:FFFF:FFFFFFFFFFFFFFFFFFFFFFFFFFFFFFFF  
@A00155:342:HHGFNDSXY:1:2210:16812:27320 1:N:0:GAACCTAG+TCCGCATA  
CCCCACTCATTAATAGCTCTGTGGCTTACTAGAGCCGCTTCACCATCATTTAACACATCGTATCTTCC  
TCTTATCGATGTGAATTGAGGATACACCACCTTCCAATCCATCTGCAGCCACACGCATGCTTCCGCC  
+  
FFFFFFFFFFFFFFFFFFFFFFFFFFFFFFFFFFFFFFFFFFFFFFFFFFFFFFFFFFFFFFFFFFFFFFFF  
FFFFFFFFFFFFFFFFFFFFFFFFFFFFFFFFFFFFFFFFFFFFFFFFFFFFFFFFFFFFFFFFFFFFFFFF  
@A00155:342:HHGFNDSXY:1:2210:17924:27273 1:N:0:GAACCTAG+TCCGCATA  
CCCCACTCATTAATAGCTCTGTGGCTTACTAGAGCCGCTTCACCATCATTTAACACATCGTATCTTCC  
TCTTATCGATGTGAATTGAGGATACACCACCTTCCAATCCATCTGCAGCCACACGCATGCTTCCGCC  
+  
FFFFFFFFFFFFFFFFFFFFFFFFFFFFFFFFFFFFFFFFFFFFFFFFFFFFFFFFFFFFFFFFFFFFFFFF  
FFFFFFFFFFFFFFFFFFFFFFFFFFFFFFFFFFFFFFFFFFFFFFFFFFFFFFFFFFFFFFFFFFFFFFFF  
@A00155:342:HHGFNDSXY:1:2210:19732:28526 1:N:0:GAACCTAG+TCCGCATA  
CCCCACTCATTAATAGCTCTGTGGCTTACTAGAGCCGCTTCACCATCATTTAACACATCGTATCTTCC  
TCTTATCGATGTGAATTGAGGATACACCACCTTCCAATCCATCTGCAGCCACACGCATGCTTCCGCC  
+  
FFFFFFFFFFFFFFFFFFFFFFFFFFFFFFFFFFFFFFFFFFFFFFFFFFFFFFFFFFFFFFFFFFFFFFFF  
FFFFFFFFFFFFFFFFFFFFFFFFFFFFFFFFFFFFFFFFFFFFFFFFFFFFFFFFFFFFFFFFFFFFFFFF  
@A00155:342:HHGFNDSXY:1:1557:2790:10238 1:N:0:GAACCTAG+TCCGCATA  
CCCCACTCATTAATAGCTCTGTGGCTTACTAGAGCCGCTTCACCATCATTTAACACATCGTATCTTCC

TCTTATCGATGTGAATTGAGGATACACCACCTTCCAATCCATCTGCAGCCACACGCATGCTTCCGCCG  
+  
FFFFFFFFFFFFFFFFFFFFFFFFFFFFFFFFFFFFFFFFFFFFFFFFFFFFFFFFFFFFFFFFFFFFFFFF  
FFFFFFFFFFFFFFFFFFFFFFFFFFFFFFFFFFFFFFFFFFFFFFFFFFFFFFFFFFFFFFFFFFFFFFFF  
@A00155:342:HHGFNDSXY:1:2210:17969:26663 1:N:0:GAACCTAG+TCCGCATA  
CCCCACTCATTAATAGCTCTGTGGCTTACTAGAGCCGCTTCACCATCATTTAACACATCGTATCTTCC  
TCTTATCGATGTGAATTGAGGATACACCACCTTCCAATCCATCTGCAGCCACACGCATGCTTCCGCCG  
+  
FFFFFFFFFFFFFFFFFFFFFFFFFFFFFFFFFFFFFFFFFFFFFFFFFFFFFFFFFFFFFFFFFFFFFFFF  
FFFFFFFFFFFFFFFFFFFFFFFFFFFFFFFFFFFFFFFFFFFFFFFFFFFFFFFFFFFFFFFFFFFFFFFF  
@A00155:342:HHGFNDSXY:1:1141:22110:5368 1:N:0:GAACCTAG+TCCGCATA  
CCCCACTCATTAATAGCTCTGTGGCTTACTAGAGCCGCTTCACCATCATTTAACACATCGTATCTTCC  
TCTTATCGATGTGAATTGAGGATACACCACCTTCCAATCCATCTGCAGCCACACGCATGCTTCCGCCG  
+  
FFFFFFFFFFFFFFFFFFFFFFFFFFFFFFFFFFFFFFFFFFFFFFFFFFFFFFFFFFFFFFFFFFFFFFFF  
FFFFF:FFFFFFFFFFFFFFFFFFFFFFFFFFFFFFFFFFFFFFFFFFFFFFFFFFFFFFFFFFFFFFFF  
@A00155:342:HHGFNDSXY:1:2268:19759:31015 2:N:0:GAACCTAG+TCCGCATA  
CCCACTCATTAATAGCTCTGTGGCTTACTAGAGCCGCTTCACCATCATTTAACACATCGTATCTTCC  
CTTATCGATGTGAATTGAGGATACACCACCTTCCAATCCATCTGCAGCCACACGCATGCTTCCGCC  
+  
FFFFF,FFFFFFFFFFFFFFFFFFFFFFFFFFFFFFFFFFFFFFFFFFFFFFFFFFFFFFFFFFFFFFFF  
FFFFFFFFFFFFFFFFFFFFFFFFFFFFFFFFFFFFFFFFFFFFFFFFFFFFFFFFFFFFFFFFFFFFFFFF  
@A00155:342:HHGFNDSXY:1:2653:8585:5807 2:N:0:GAACCTAG+TCCGCATA  
CCCACTCATTAATAGCTCTGTGGCTTACTAGAGCCGCTTCACCATCATTTAACACATCGTATCTTCC  
CTTATCGATGTGAATTGAGGATACACCACCTTCCAATCCATCTGCAGCCACACGCATGCTTCCGCCG  
+  
F:FFFFFFFFFFFFFFFFFFFFFFFFFFFFFFFFFFFFFFFFFFFFFFFFFFFFFFFFFFFFFFFFFFFF  
FFF:FFFFFFFFFFFFFFFFFFFFFFFFFFFFFFFFFFFFFFFFFFFFFFFFFFFFFFFFFFFFFFFF  
@A00155:342:HHGFNDSXY:1:1478:32976:34334 1:N:0:GAACCTAG+TCCGCATA  
CCCACTCATTAATAGCTCTGTGGCTTACTAGAGCCGCTTCACCATCATTTAACACATCGTATCTTCC  
TTATCGATGTGAATTGAGGATACACCACCTTCCAATCCATCTGCAGCCACACGCATGCTTCCGCCG  
+  
FFFFFFFFFFFFFFFFFFFFFFFFFFFFFFFFFFFFFFFFFFFFFFFFFFFFFFFFFFFFFFFFFFFF  
FFFFFFFFFFFFFFFFFFFFFFFFFFFFFFFFFFFFFFFFFFFFFFFFFFFFFFFFFFFFFFFFFFFFFFFF  
@A00155:342:HHGFNDSXY:1:2604:27281:8625 2:N:0:GAACCTAG+TCCGCATA  
CACTCATTAATAGCTCTGTGGCTTACTAGAGCCGCTTCACCATCATTTAACACATCGTATCTTCC  
TATCGATGTGAATTGAGGATACACCACCTTCCAATCCATCTGCAGCCACACGCATGCTTCCGCCG  
+  
FFFFFFFFFFFFFFFFFFFFFFFFFFFFFFFFFFFFFFFFFFFFFFFFFFFFFFFFFFFFFFFFFFFF  
FFFFFFFFFFFFFFFFFFFFFFFFFFFFFFFFFFFFFFFFFFFFFFFFFFFFFFFFFFFFFFFFFFFFFFFF  
@A00155:342:HHGFNDSXY:1:1467:1551:28980 2:N:0:GAACCTAG+TCCGCATA  
CACTCATTAATAGCTCTGTGGCTTACTAGAGCCGCTTCACCATCATTTAACACATCGTATCTTCC  
TATCGATGTGAATTGAGGATACACCACCTTCCAATCCATCTGCAGCCACACGCATGCTTCCGCCG  
+  
FFFFF,F,FFFFFFFF:FF::FFFFFFFF:FFFFF:FFFFFFFF,FFFFFFFF:FFFFFFFF:FFFF  
FFFFFFFFFFFFFFFFFFFFFFFFFFFFFFFFFFFFFFFFFFFFFFFFFFFFFFFFFFFFFFFFFFFF  
@A00155:342:HHGFNDSXY:1:2263:16532:33473 2:N:0:GAACCTAG+TCCGCATA  
CACTCATTAATAGCTCTGTGGCTTACTAGAGCCGCTTCACCATCATTTAACACATCGTATCTTCC  
TATCGATGTGAATTGAGGATACACCACCTTCCAATCCATCTGCAGCCACACGCATGCTTCCGCCG  
+  
FFFFFFF,FF:FFF:FFFFFF:FFF,FFFFFFFFFFFFFFFFFFFFFFFFFFFFFFFFFFFFFFFF  
F:FFF,FFFF:FFFFFFFFFFFFFFFFFFFF,FFFFFFFFFFFF:FFFFF,FFFFFFFFFFFFFFFF  
@A00155:342:HHGFNDSXY:1:2658:25482:29747 1:N:0:GAACCTAG+TCCGCATA  
ACTCATTAATAGCTCTGTGGCTTACTAGAGCCGCTTCACCATCATTTAACACATCGTATCTTCC

ATCGATGTGAATTGAGGATACACCACCTTCCAATCCATCTGCAGCCACACGCATGCTTCCGCCGTTGA  
+  
FFFFFFFFFFFFFFFFFFFFFFFFFFFFFFFFFFFFFFFFFFFFFFFFFFFFFFFFFFFFFFFFFFFFFFFF  
FFFFFFFFFFFFFFFFFFFFFFFFFFFFFFFFFFFFFFFFFFFFFFFFFFFFFFFFFFFFFFFFFFFFFFFF  
@A00155:342:HHGFNDSXY:1:1477:27561:16313 1:N:0:GAACCTAG+TCCGCATA  
ACTCATTAATAGCTCTGTGGCTTACTAGAGCCGCTTCACCATCATTTAACACATCGTATCTTCCTCTT  
ATCGATGTGAATTGAGGATACACCACCTTCCAATCCATCTGCAGCCACACGCATGCTTCCGCCGTTGA  
+  
FFFFFFFFFFFFFFFFFFFFFFFFFFFFFFFFFFFFFFFFFFFFFFFFFFFFFFFFFFFFFFFFFFFFFFFF  
FFFFFFFFFFFFFFFFFFFFFFFFFFFFFFFFFFFFFFFFFFFFFFFFFFFFFFFFFFFFFFFFFFFFFFFF  
@A00155:342:HHGFNDSXY:1:1405:14136:14606 1:N:0:GAACCTAG+TCCGCATA  
ACTCATTAATAGCTCTGTGGCTTACTAGAGCCGCTTCACCATCATTTAACACATCGTATCTTCCTCTT  
ATCGATGTGAATTGAGGATACACCACCTTCCAATCCATCTGCAGCCACACGCATGCTTCCGCCGTTGA  
+  
FFFFFFFFFFFFFFFFFFFFFFFFFFFFFFFFFFFFFFFFFFFFFFFFFFFFFFFFFFFFFFFFFFFFFFFF  
FFF:FFFFFFFFFFFFFFFFFFFFFFFFFFFFFFFFFFFFFFFFFFFFFFFFFFFFFFFFFFFFFFFFFFFF  
@A00155:342:HHGFNDSXY:1:2645:19388:1939 1:N:0:GAACCTAG+TCCGCATA  
ACTCATTAATAGCTCTGTGGCTTACTAGAGCCGCTTCACCATCATTTAACACATCGTATCTTCCTCTT  
ATCGATGTGAATTGAGGATACACCACCTTCCAATCCATCTGCAGCCACACGCATGCTTCCGCCGTTGA  
+  
FFFFFFFFFFFFFFFFFFFFFFFFFFFFFFFFFFFFFFFFFFFFFFFFFFFFFFFFFFFFFFFFFFFFFFFF  
FFFFFFFFFFFFFFFFFFFFFFFFFFFFFFFFFFFFFFFFFFFFFFFFFFFFFFFFFFFFFFFFFFFFFFFF  
@A00155:342:HHGFNDSXY:1:1370:4788:14105 1:N:0:GAACCTAG+TCCGCATA  
CTCATTAATAGCTCTGTGGCTTACTAGAGCCGCTTCACCATCATTTAACACATCGTATCTTCCTCTTA  
TCGATGTGAATTGAGGATACACCACCTTCCAATCCATCTGCAGCCACACGCATGCTTCCGCCGTTGAT  
+  
FFFF:FFFFFFFFFFFFFFFFFFFFFFFFFFFFFFFFFFFFFFFFFFFFFFFFFFFFFFFFFFFFFFFFFFFF  
FFFFFFFFFFFFFFFFFFFFFFFFFFFFFFFFFFFFFFFFFFFFFFFFFFFFFFFFFFFFFFFFFFFFFFFF  
@A00155:342:HHGFNDSXY:1:1624:20419:11992 2:N:0:GAACCTAG+TCCGCATA  
CATTAATAGCTCTGTGGCTTACTAGAGCCGCTTCACCATCATTTAACACATCGTATCTTCCTCTTATC  
GATGTGAATTGAGGATACACCACCTTCCAATCCATCTGCAGCCACACGCATGCTTCCGCC  
+  
FFFFFFFFFFFFFFFFFFFFFFFFFFFFFFFFFFFFFFFFFFFFFFFFFFFFFFFFFFFFFFFFFFFFFFFF  
FFFFFFFFFFFFFFFFFFFFFFFFFFFFFFFFFFFFFFFFFFFFFFFFFFFFFFFFFFFFFFFFFFFFFFFF  
@A00155:342:HHGFNDSXY:1:1477:27561:16313 2:N:0:GAACCTAG+TCCGCATA  
ATTAATAGCTCTGTGGCTTACTAGAGCCGCTTCACCATCATTTAACACATCGTATCTTCCTCTTATCG  
ATGTGAATTGAGGATACACCACCTTCCAATCCATCTGCAGCCACACGCATGCTTCCGCCGTTGATGG  
+  
FFFFF:FFFFFFFFFFFFFFFFFFFFFFFFFFFFFFFFFFFFFFFFFFFFFFFFFFFFFFFFFFFFFFFFFFFF  
FFFFFFFFFFFFFFFFFFFFFFFFFFFFFFFFFFFFFFFFFFFFFFFFFFFFFFFFFFFFFFFFFFFFFFFF  
@A00155:342:HHGFNDSXY:1:1557:2790:10238 2:N:0:GAACCTAG+TCCGCATA  
ATTAATAGCTCTGTGGCTTACTAGAGCCGCTTCACCATCATTTAACACATCGTATCTTCCTCTTATCG  
ATGTGAATTGAGGATACACCACCTTCCAATCCATCTGCAGCCACACGCATGCTTCCGCCGTTGATGGC  
+  
FFFFFFFFFFFFFFFFFFFFFFFFFFFFFFFFFFFFFFFFFFFFFFFFFFFFFFFFFFFFFFFFFFFFF,FFFFFFFFFFFFFFFFFFFFFFFFFFFFFFFF:F  
FFFFFFFFFFFFFFFFFFFFFFFFFFFFFFFFFFFFFFFFFFFFFFFFFFFFFFFFFFFFFFFFFFFFFFFF  
@A00155:342:HHGFNDSXY:1:1511:16947:13683 2:N:0:GAACCTAG+TCCGCATA  
ATTAATAGCTCTGTGGCTTACTAGAGCCGCTTCACCATCATTTAACACATCGTATCTTCCTCTTATCG  
ATGTGAATTGAGGATACACCACCTTCCAATCCATCTGCAGCCACACGCATGCTTCCGCCGTTGATGGC  
+  
F:FFFFFFFFFFFFFFFFFFFFFFFFFFFFFFFFFFFFFFFFFFFFFFFFFFFFFFFFFFFFFFFFFFFFF  
FFFFFFFFFFFFFFFFFFFFFFFFFFFFFFFFFFFFFFFFFFFFFFFFFFFFFFFFFFFFFFFFFFFFFFFF  
@A00155:342:HHGFNDSXY:1:2541:2700:17253 1:N:0:GAACCTAG+TCCGCATA  
AGCTCTGTGGCTTACTAGAGCCGCTTCACCATCATTTAACACATCGTATCTTCCTCTTATCGATGTGA

ATTGAGGATACACCACCTTCCAATCCATCTGCAGCCACACGCATGCTTCCGCCGTTGATGGCACG  
+  
FFFF:FFF:FFFFFFFFFFFFFFFF:FFFFFFFFFFFF:FFFFFF,FFFFFF:FFFF,FF:FFFFFFFF  
FFFFFFFFFFFFFFFF:FFF:FFF:FFFFFFFFFFFFFFFFFFFFFFFF:FFFFFFFFFFFF:FFFF:FFF:  
@A00155:342:HHGFNDSXY:1:2541:2736:17190 1:N:0:GAACCTAG+TCCGCATA  
AGCTCTGTGGCTTACTAGAGCCGCTTCACCATCATTTAACACATCGTGTCTTCCTCTTATCGATGTGA  
ATTGAGGATACACCACCTTCCAATCCATCTGCAGCCACACGCATGCTTCCGCCGTTGATGGCACGAAC  
+  
FFFFFFFFFFFFFFFFFFFFFFFFFFFFFFFFFFFFFFFFFFFFFFFFFFFFFFFFFFFFFFFF,FFFFFFFFFFFFFFFFFFFFFFFF  
FFFFFFFFFFFFFFFFFFFFFFFFFFFFFFFFFFFFFFFFFFFFFFFFFFFFFFFFFFFFFFFFFFFFFFFFFFFFFFFF  
@A00155:342:HHGFNDSXY:1:2133:30237:10300 1:N:0:GAACCTAG+TCCGCATA  
GCTCTGTGGCTTACTAGAGCCGCTTCACCATCATTTAACACATCGTATCTTCCTCTTATCGATGTGAA  
TTGAGGATACACCACCTTCCAATCCATCTGCAGCCACACGCATGCTTCCGCCGTTGATGGCACGAAC  
+  
FFFFFFFFFFFFFFFFFFFFFFFFFFFFFFFFFFFFFFFFFFFFFFFFFFFFFFFFFFFFFFFF:FFFFFFFFFFFFFFFFFFFFFFFF  
FFFFFFFFFFFFFFFFFFFFFFFFFFFFFFFF:FFFFFFFFFFFFFFFFFFFFFFFF:FFFFFFFFFFFFFFFF  
@A00155:342:HHGFNDSXY:1:2243:27037:27367 1:N:0:GAACCTAG+TCCGCATA  
GCTCTGTGGCTTACTAGAGCCGCTTCACCATCATTTAACACATCGTATCTTCCTCTTATCGATGTGAA  
TTGAGGATACACCACCTTCCAATCCATCTGCAGCCACACGCATGCTTCCGCCGTTGATGGCACGAAC  
+  
FFFFFFFFFFFFFFFFFFFFFFFFFFFFFFFFFFFFFFFFFFFFFFFFFFFFFFFFFFFFFFFF:FFFFFFFFFFFFFFFFFFFFFFFF  
FFFFFFFFFFFFFFFFFFFFFFFFFFFFFFFF:FFFFFFFFFFFFFFFFFFFFFFFFFFFFFFFFFFFFFFFF,FFFFFFF  
@A00155:342:HHGFNDSXY:1:2105:6415:5087 1:N:0:GAACCTAG+TCCGCATA  
GCTCTGTGGCTTACTAGAGCCGCTTCACCATCATTTAACACATCGTATCTTCCTCTTATCGATGTGAA  
TTGAGGATACACCACCTTCCAATCCATCTGCAGCCACACGCATGCTTCCGCCGTTGATGGCACGAAC  
+  
FFFFFFFFFFFFFFFFFFFFFFFFFFFFFFFFFFFFFFFFFFFFFFFFFFFFFFFFFFFFFFFF:FFFFFF:F:F:FFFFFFFF,FFFF  
FFFF:FF:FFFFFFFF,FFFFFFFFFFFFFFFFFFFFFFFFFFFFFFFF:FFFFFFFFFFFF:FFFFFFFFFFFF  
@A00155:342:HHGFNDSXY:1:1552:17797:19820 1:N:0:GAACCTAG+TCCGCATA  
GCTCTGTGGCTTACTAGAGCCGCTTCACCATCATTTAACACATCGTATCTTCCTCTTATCGATGTGAA  
TTGAGGATACACCACCTTCCAATCCATCTGCAGCCACACGCATGCTTCCGCCGTTGATGGCACGAAC  
+  
FFFFFFFFFFFFFFFFFFFFFFFFFFFFFFFFFFFFFFFFFFFFFFFFFFFFFFFFFFFFFFFF:FFFFFFFFFFFFFFFFFFFFFFFF  
FFFFFFFFFFFFFFFFFFFFFFFFFFFFFFFFFFFFFFFFFFFFFFFFFFFFFFFFFFFFFFFFFFFFFFFF:FFFFFFF  
@A00155:342:HHGFNDSXY:1:2268:19759:31015 1:N:0:GAACCTAG+TCCGCATA  
CTCTGTGGCTTACTAGAGCCGCTTCACCATCATTTAACACATCGTATCTTCCTCTTATCGATGTGAAT  
TGAGGATACACCACCTTCCAATCCATCTGCAGCCACACGCATGCTTCCGCCGTTGATGGCACGAAC  
+  
FFFFFFFFFFFFFFFFFFFF:FFFFFFFFF:FFFFFFFFFFFFFFFFFFFFFFFFFFFFFFFFFFFFFFFFFFFFFFFF  
FFFFFFFFFFFFFFFFFFFFFFFFFFFFFFFFFFFFFFFFFFFFFFFFFFFFFFFFFFFFFFFFFFFFFFFFFFFF  
@A00155:342:HHGFNDSXY:1:1152:17824:30326 1:N:0:GAACCTAG+TCCGCATA  
CTCTGTGGCTTACTAGAGCCGCTTCACCATCATTTAACACATCGTATCTTCCTCTTATCGATGTGAAT  
TGAGGATACACCACCTTCCAATCCATCTGCAGCCACACGCATGCTTCCGCCGTTGATGGCACGAAC  
+  
FFFFFFFFFFFFFFFFFFFF,FFFFFFFFFFFFFFFFFFFFFFFFFFFFFFFFFFFFFFFFFFFFFFFFFFFFFFFF  
FFFFFFFFFFFFFFFFFFFFFFFFFFFFFFFFFFFFFFFFFFFFFFFFFFFFFFFFFFFFFFFFFFFFFFFFFFFF  
@A00155:342:HHGFNDSXY:1:1247:18276:15796 2:N:0:GAACCTAG+TCCGCATA  
CTCTGTGGCTTACTAGAGCCGCTTCACCATCATTTAACACATCGTATCTTCCTCTTATCGATGTGAAT  
TGAGGATACACCACCTTCCAATCCATCTGCAGCCACACGCATGCTTCCGCCGTTGATGGCACGAAC  
+  
FFFFFFFFFFFFFFFFFFFF:FFFFFFFFFFFFF:FFFFFFFFFFFFFFFF:FFFF:FFFFFFFFFFFFFFFFFFFF  
FFFFFFFFFFFFFFFFFFFFFFFFFFFFFFFFFFFFFFFFFFFFFFFFFFFFFFFFFFFFFFFFFFFFFFFFFFFF  
@A00155:342:HHGFNDSXY:1:2244:26323:30170 1:N:0:GAACCTAG+TCCGCATA  
CTCTGTGGCTTACTAGAGCCGCTTCACCATCATTTAACACATCGTATCTTCCTCTTATCGATGTGAAT

TGAGGATACACCACCTTCCAATCCATCTGCAGCCACACGCATGCTTCCGCCGTTGATGGCACGAACTG  
+  
FFFFFFFFFFFFFFFFFFFFFFFFFFFFFFFFFFFFFFFFFFFFFFFFFFFFFFFFFFFFFFFFFFFFFFFF  
FFFFFFFFFFFFFFFFFFFFFFFFFFFFFFFFFFFFFFFFFFFFFFFFFFFFFFFFFFFFFFFFFFFFFFFF  
@A00155:342:HHGFNDSXY:1:1659:27100:3302 1:N:0:GAACCTAG+TCCGCATA  
CTGTGGCTTACTAGAGCCGCTTCACCATCATTTAACACATCGTATCTTCCTCTTATCGATGTGAATTG  
AGGATACACCACCTTCCAATCCATCTGCAGCCACACGCATGCTTCCGCCGTTGATGGCACGAACTGGT  
+  
FFFFF:FFFFFFFF,FFFFFFFFFFFFFFFFFFFFFFFFFFFFFFFFFFFFFFFFFFFFFFFFFFFFFFFF  
FFF::FFFFFFFFFFFFFFFFFFFFFFFFFFFFFFFFFFFFFFFFFFFFFFFFFFFFFFFFFFFFFFFF  
@A00155:342:HHGFNDSXY:1:1659:26350:4382 1:N:0:GAACCTAG+TCCGCATA  
CTGTGGCTTACTAGAGCCGCTTCACCATCATTTAACACATCGTATCTTCCTCTTATCGATGTGAATTG  
AGGATACACCACCTTCCAATCCATCTGCAGCCACACGCATGCTTCCGCCGTTGATGGCACGAACTGGT  
+  
FFFFFFFFFFFFFFFFFFFFFFFFFFFFFFFFFFFFFFFFFFFFFFFFFFFFFFFFFFFFFFFFFFFFFFFF  
FFFFFFFFFFFFFFFFFFFFFFFFFFFFFFFFFFFFFFFFFFFFFFFFFFFFFFFFFFFFFFFFFFFFFFFF  
@A00155:342:HHGFNDSXY:1:2658:25482:29747 2:N:0:GAACCTAG+TCCGCATA  
TGTGGCTTACTAGAGCCGCTTCACCATCATTTAACACATCGTATCTTCCTCTTATCGATGTGAATTGA  
GGATACACCACCTTCCAATCCATCTGCAGCCACACGCATGCTTCCGCCGTTGATGGCACGAACTGGTA  
+  
FFFFFFFFFFFFFFFFFFFFFFFFFFFFFFFFFFFFFFFFFFFFFFFFFFFFFFFFFFFFFFFFFFFFFFFF  
FFFFFFFFFFFFFFFFFFFFFFFFFFFFFFFFFFFFFFFFFFFFFFFFFFFFFFFFFFFFFFFFFFFFFFFF  
@A00155:342:HHGFNDSXY:1:1430:17607:28510 1:N:0:GAACCTAG+TCCGCATA  
TGTGGCTTACTAGAGCCGCTTCACCATCATTTAACACATCGTATCTTCCTCTTATCGATGTGAATTGA  
GGATACACCACCTTCCAATCCATCTGCAGCCACACGCATGCTTCCGCCGTTGATGGCACGAACTGGTA  
+  
FFFFF:FFFFFFFFFFFFFFFFFFFFFFFFFFFFFFFFFFFFFFFFFFFFFFFFFFFFFFFFFFFFFFFF  
FFFFFFFFFFFFFFFFFFFFFFFFFFFFFFFFFFFFFFFFFFFFFFFFFFFFFFFFFFFFFFFFFFFFFFFF  
@A00155:342:HHGFNDSXY:1:1225:24062:3333 1:N:0:GAACCTAG+TCCGCATA  
TGTGGCTTACTAGAGCCGCTTCACCATCATTTAACACATCGTATCTTCCTCTTATCGATGTGAATTGA  
GGATACACCACCTTCCAATCCATCTGCAGCCACACGCATGCTTCCGCCGTTGATGGCACGAACTGGTA  
+  
FFFFFFFF:FFFFFFFFFFFFFFFFFFFFFFFFFFFFFFFFFFFFFFFFFFFFFFFFFFFFFFFFFFFFFFFF  
FFFFFFFFFFFFFFFFFFFFFFFFFFFFFFFFFFFFFFFFFFFFFFFFFFFFFFFFFFFFFFFFFFFFFFFF  
@A00155:342:HHGFNDSXY:1:2221:18900:35978 2:N:0:GAACCTAG+TCCGCATA  
TGTGGCTTACTAGAGCCGCTTCACCATCATTTAACACATCGTATCTTCCTCTTATCGATGTGAATTGA  
GGATACACCACCTTCCAATCCATCTGCAGCCACACGCATGCTTCCGCCGTTGATGGCACGAACTGGTA  
+  
FFFFF::FFFFFFFFFFFF,FFFFF,FFFFFFFFFFFFFFFFFFFFFFFFFFFFFFFFFFFFFFFFFFFF  
FFF,FFFFFFFFFFFFFFFFFFFFFFFFFFFFFFFFFFFFFFFFFFFFFFFFFFFFFFFFFFFFFFFFFFFF  
@A00155:342:HHGFNDSXY:1:1405:14136:14606 2:N:0:GAACCTAG+TCCGCATA  
TGTGGCTTACTAGAGCCGCTTCACCATCATTTAACACATCGTATCTTCCTCTTATCGATGTGAATTGA  
GGATACACCACCTTCCAATCCATCTGCAGCCACACGCATGCTTCCGCCGTTGATGGCACGAACTGGTA  
+  
FFFFFFFFFFFFFFFFFFFFFFFFFFFFFFFFFFFF,FFFFFFFFFFFFFFFFFFFFFFFFFFFFFFFFFFFF  
FFFFFFFFFFFFFFFFFFFFFFFFFFFFFFFFFFFFFFFFFFFFFFFFFFFFFFFFFFFFFFFFFFFFFFFF  
@A00155:342:HHGFNDSXY:1:1569:24867:9580 2:N:0:GAACCTAG+TCCGCATA  
TGTGGCTTACTAGAGCCGCTTCACCATCATTTAACACATCGTATCTTCCTCTTATCGATGTGAATTGA  
GGATACACCACCTTCCAATCCATCTGCAGCCACACGCATGCTTCCGCCGTTGATGGCACGAACTGGTA  
+  
FFFFF,FFFFFFFFFFFFFFFFFFFFFFFFFFFFFFFFFFFFFFFFFFFFFFFFFFFFFFFFFFFFFFFF  
FFFFFFFFFFFFFFFFFFFFFFFFFFFFFFFFFFFFFFFFFFFFFFFFFFFFFFFFFFFFFFFFFFFFFFFF  
@A00155:342:HHGFNDSXY:1:2565:25238:31015 2:N:0:GAACCTAG+TCCGCATA  
GTGGCTTACTAGAGCCGCTTCACCATCATTTAACACATCGTATCTTCCTCTTATCGATGTGAATTGAG



GATACACCACCTTCCAATCCATCTGCAGCCACACGCATGCTTCCGCCGTTGATGGCACGAACTGGTAT  
+  
FFFFFFFFFFFFFFFFFFFFFFFFFFFFFFFFFFFFFFFF:FFFFF:FFFFFFFFFFFFFFFFFFFFFFFFFFFFFFFF  
FFFFFFFFFFFFFFFFFFFFFFFFFFFFFFFFFFFFFFFF:FFFFFFFFF:FFFFFFFFFFFFFFFFFFFFFFFFFFFFFFFF  
@A00155:342:HHGFNDSXY:1:1430:17607:28510 2:N:0:GAACCTAG+TCCGCATA  
GTGGCTTACTAGAGCCGCTTCACCATCATTTAACACATCGTATCTTCCTCTTATCGATGTGAATTGAG  
GATACACCACCTTCCAATCCATCTGCAGCCACACGCATGCTTCCGCCGTTGATGGCACGAACTGGTAT  
+  
FFFFFFF:FFFFFFFFFFFF,FF,F,FFFFFFFFFFFFFFFFFFFFFFFFFFFFFFFFFFFFFFFFFFFFFFFFFFFFF  
FFFFFFFFFFFFFFFFFFFFFFFFFFFFFFFFFFFFFFFF:FFFFFFFFFFFFFFFFFFFFFFFFFFFFFFFFFFFFFFFF  
@A00155:342:HHGFNDSXY:1:2619:11270:29309 2:N:0:GAACCTAG+TCCGCATA  
GTGGCTTACTAGAGCCGCTTCACCATCATTTAACACATCGTATCTTCCTCTTATCGATGTGAATTGAG  
GATACACCACCTTCCAATCCATCTGCAGCCACACGCATGCTTCCGCCGTTGATGGCACGAACTGGTAT  
+  
FFFFFFFFFFFFFFFFFFFFF::FFFFFFFFFFFFFFFFFFFF:FFFFF:FFFFFFFFFFFFFFFFFFFFFFFFFFFFF  
FF:FFFFFFFFFFFFFFFFFFFFFFFFFFFFFFFFFFFFFFFFFFFFFFFFFFFFFFFFFFFFFFFFFFFFFFFFFFFFF  
@A00155:342:HHGFNDSXY:1:1225:24062:3333 2:N:0:GAACCTAG+TCCGCATA  
GTGGCTTACTAGAGCCGCTTCACCATCATTTAACACATCGTATCTTCCTCTTATCGATGTGAATTGAG  
GATACACCACCTTCCAATCCATCTGCAGCCACACGCATGCTTCCGCCGTTGATGGCACGAACTGGTAT  
+  
FFFFFFFFFFFFFFFFFFFFFFFFFFFFFFFFFFFFFFFFFFFFFFFFFFFFFFFFFFFFFFFFFFFFFFFFFFFFF  
FFFFFFFFFFFFFFFFFFFFFFFFFFFFFFFFFFFFFFFF:FFFFFFFFFF,FFFFFFFFFFFFFFFFFFFFFFFFFFFFF  
@A00155:342:HHGFNDSXY:1:1247:18276:15796 1:N:0:GAACCTAG+TCCGCATA  
GTGGCTTACTAGAGCCGCTTCACCATCATTTAACACATCGTATCTTCCTCTTATCGATGTGAATTGAG  
GATACACCACCTTCCAATCCATCTGCAGCCACACGCATGCTTCCGCCGTTGATGGCACGAACTGGTAT  
+  
FFFFFFF:FFFFFFFFFFFFFFFFFFFFFFFFFFFFF:FFFFFFFFFFFFFFFFFFFFFFFFFFFFFFFFFFFFF  
FFFFFFFFFFFFFFFFFFFFFFFFFFFFFFFFFFFFFFFF,FFFFFFFFFFFFF:FFFFFFF:FFFFFFF:F:FFF  
@A00155:342:HHGFNDSXY:1:1624:20419:11992 1:N:0:GAACCTAG+TCCGCATA  
GGCTTACTAGAGCCGCTTCACCATCATTTAACACATCGTATCTTCCTCTTATCGATGTGAATTGAGGA  
TACACCACCTTCCAATCCATCTGCAGCCACACGCATGCTTCCGCCGTTGATGGCACGAACTGGTAT  
+  
FFFFFFFFFFFFFFFFFFFFFFFFFFFFFFFFFFFFFFFFFFFFFFFFFFFFFFFFFFFFFFFFFFFFFFFFFFFFF  
FFFFFFFFFFFFFFFFFFFFFFFFFFFFFFFFFFFFFFFFFFFFFFFFFFFFFFFFFFFFFFFFFFFFFFFFFFFFF  
@A00155:342:HHGFNDSXY:1:1330:3495:36980 1:N:0:GAACCTAG+TCCGCATA  
CTTACTAGAGCCGCTTCACCATCATTTAACACATCGTATCTTCCTCTTATCGATGTGAATTGAGGATA  
CACCACCTTCCAATCCATCTGCAGCCACACGCATGCTTCCGCCGTTGATGGCACGAACTGGTAT  
+  
FFFFFFFFFFFFFFFFFFFFFFFFFFFFF:FFFFFFFFFFFF:FFFFFFF:FFFFFFFFFFFFFFFFFFFFFFFFFFFFF  
FFFFFFFFF:FFFFFFFFFFFFFFFFFFFFFFFFFFFFFFFFFFFFFFFFFFFFFFFFFFFFFFFFFFFFFFFFFFFFF  
@A00155:342:HHGFNDSXY:1:1608:20211:24690 2:N:0:GAACCTAG+TCCGCATA  
TACTAGAGCCGCTTCACCATCATTTAACACATCGTATCTTCCTCTTATCGATGTGAATTGAGGATACA  
CCACCTTCCAATCCATCTGCAGCCACACGCATGCTTCCGCCGTTGATGGCACGAACTGGTATGCCGCA  
+  
FFFFFFFFFFFFFFF:FFFFFFFFFF,FFFFF:,F:FFFFFFFFFFFFFFFFFFFFFFFFFFFFFFFFFFFFF:FFF  
FFFFFFFFFFFFFFFFFFFFFFFFFFFFFFFFFFFFFFFF:FFFFFFFFFFFFFFFFFFFFFFFFFFFFFFFFFFFFF  
@A00155:342:HHGFNDSXY:1:1502:16676:33473 2:N:0:GAACCTAG+TCCGCATA  
TACTAGAGCCGCTTCACCATCATTTAACACATCGTATCTTCCTCTTATCGATGTGAATTGAGGATACA  
CCACCTTCCAATCCATCTGCAGCCACACGCATGCTTCCGCCGTTGATGGCACGAACTGGTATGCCGCA  
+  
FFFFFFFFFFFFF:FFF:F,FFFFFFFFFFFFFFFFFFFFFFFFFFFFF,FFFFFFFFFFFFFFFFFFFFFFFFFFFFF  
FFFFFFFFFFFFFFFFFFFFFFFFFFFFF:FFFFFFF:FFFFFFFFFFFFFFFFFFFFFFFFFFFFFFFFFFFFF  
@A00155:342:HHGFNDSXY:1:1322:8440:35180 2:N:0:GAACCTAG+TCCGCATA  
ACTAGAGCCGCTTCACCATCATTTAACACATCGTATCTTCCTCTTATCGATGTGAATTGAGGATACAC

CACCTTCCAATCCATCTGCAGCCACACGCATGCTTCCGCCGTTGATGGCACGAACTGGTATGCCGCAA  
+  
FFFFFFFF,FFFFFFFFFFFFFFFFFFFFFFFFFFFFFFFFFFFFFFFFFFFFFFFFFFFFFFFFFFFFFFFF  
FFFFFFFFFFFFFFFFFFFFFFFFFFFFFFFFFFFFFFFFFFFFFFFFFFFFFFFFFFFFFFFFFFFFFFFF  
@A00155:342:HHGFNDSXY:1:2508:13548:2472 2:N:0:GAACCTAG+TCCGCATA  
ACTAGAGCCGCTTCACCATCATTTAACACATCGTATCTTCCTCTTATCGATGTGAATTGAGGATACAC  
CACCTTCCAATCCATCTGCAGCCACACGCATGCTTCCGCCGTTGATGGCACGAACTGGTATGCCGCAA  
+  
FFFFFFFFFFFFFFFFFFFFFFFFFFFFFFFFFFFFFFFFFFFFFFFFFFFFFFFFFFFFFFFFFFFFFFFF  
FFFFFFFFFFFFFFFFFFFFFFFFFFFFFFFFFFFFFFFFFFFFFFFFFFFFFFFFFFFFFFFFFFFFFFFF  
@A00155:342:HHGFNDSXY:1:1659:27100:3302 2:N:0:GAACCTAG+TCCGCATA  
CTAGAGCCGCTTCACCATCATTTAACACATCGTATCTTCCTCTTATCGATGTGAATTGAGGATACACC  
ACCTTCCAATCCATCTGCAGCCACACGCATGCTTCCGCCGTTGATGGCACGAACTGGTATGCCGCAA  
+  
FFFFFFFFFFFFFFFFFFFFFFFFFFFFFFFFFFFFFFFFFFFFFFFFFFFFFFFFFFFFFFFFFFFFFFFF  
:FFFFFFFFFFFFFFFFFFFFFFFFFFFFFFFFFFFFFFFFFFFFFFFFFFFFFFFFFFFFFFFFFFFFFFFF  
@A00155:342:HHGFNDSXY:1:1659:26350:4382 2:N:0:GAACCTAG+TCCGCATA  
CTAGAGCCGCTTCACCATCATTTAACACATCGTATCTTCCTCTTATCGATGTGAATTGAGGATACACC  
ACCTTCCAATCCATCTGCAGCCACACGCATGCTTCCGCCGTTGATGGCACGAACTGGTATGCCGCAA  
+  
FFFFFFFFFFFFFFFF:FFFFFFFFFFFFFFFFFFFFFFFFFFFFFFFFFFFFFFFFFFFFFFFFFFFFFFFF  
FFFFFFFFFFFFFFFFFFFFFFFFFFFFFFFFFFFFFFFFFFFFFFFFFFFFFFFFFFFFFFFFFFFFFFFF  
@A00155:342:HHGFNDSXY:1:2471:28836:36401 2:N:0:GAACCTAG+TCCGCATA  
CTAGAGCCGCTTCACCATCATTTAACACATCGTATCTTCCTCTTATCGATGTGAATTGAGGATACACC  
ACCTTCCAATCCATCTGCAGCCACACGCATGCTTCCGCCGTTGATGGCACGAACTGGTATGCCGCAA  
+  
FFFFFFFFFFFFFFFFFFFFFFFFFFFFFFFFFFFFFFFFFFFFFFFFFFFFFFFFFFFFFFFFFFFFFFFF  
FFFFFFFFFFFFFFFFFFFFFFFFFFFFFFFFFFFFFFFFFFFFFFFFFFFFFFFFFFFFFFFFFFFFFFFF  
@A00155:342:HHGFNDSXY:1:2123:22535:32534 2:N:0:GAACCTAG+TCCGCATA  
AGCCGCTTCACCATCATTTAACACATCGTATCTTCCTCTTATCGATGTGAATTGAGGATACACCACCT  
TCCAATCCATCTGCAGCCACACGCATGCTTCCGCCGTTGATGGCACGAACTGGTATGCC  
+  
FFFFFFFFFFFFFFFFFFFFFFFFFFFFFFFFFFFFFFFFFFFFFFFFFFFFFFFFFFFFFFFFFFFFFFFF  
FFFFF:FFFFFFFFFFFFFFFFFFFFFFFFFFFFFFFFFFFFFFFFFFFFFFFFFFFFFFFFFFFFFFFF  
@A00155:342:HHGFNDSXY:1:2244:26323:30170 2:N:0:GAACCTAG+TCCGCATA  
CGCTTCACCATCATTTAACACATCGTATCTTCCTCTTATCGATGTGAATTGAGGATACACCACCTTCC  
AATCCATCTGCAGCCACACGCATGCTTCCGCCGTTGATGGCACGAACTGGTATGCCGCAAACCTATG  
+  
F:F:FFFFFFFFFFFFFFFFFFFFFFFFFFFFFFFFFFFFFFFFFFFFFFFFFFFFFFFFFFFFFFFF  
FF,FFFFFFFFFFFFFFFFFFFFFFFFFFFFFFFFFFFFFFFFFFFFFFFFFFFFFFFFFFFFFFFF  
@A00155:342:HHGFNDSXY:1:1502:16676:33473 1:N:0:GAACCTAG+TCCGCATA  
CGCTTCACCATCATTTAACACATCGTATCTTCCTCTTATCGATGTGAATTGAGGATACACCACCTTCC  
AATCCATCTGCAGCCACACGCATGCTTCCGCCGTTGATGGCACGAACTGGTATGCCGCAAACCTATG  
+  
FFFFFFFFFFFFFFFFFFFFFFFFFFFFFFFFFFFFFFFFFFFFFFFFFFFFFFFFFFFFFFFFFFFFFFFF  
FFFFFFFFFFFFFFFFFFFFFFFFFFFFFFFFFFFFFFFFFFFFFFFFFFFFFFFFFFFFFFFFFFFFFFFF  
@A00155:342:HHGFNDSXY:1:1429:32841:34757 2:N:0:GAACCTAG+TCCGCATA  
CGCTTCACCATCATTTAACACATCGTATCTTCCTCTTATCGATGTGAATTGAGGATACACCACCTTCC  
AATCCATCTGCAGCCACACGCATGCTTCCGCCGTTGATGGCACGAACTGGTATGCCGCAAACCTATG  
+  
FFFFFFFFFFFFFFFFFFFF:FFFF:FFFFFF:FF:FFFFFFFFFFFFFFFF:FFFFFFFFFFFFFF:FFFF:F  
FFFFFFFFFFFFFFFFFFFFFFFFFFFFFFFFFFFFFFFFFFFFFFFFFFFFFFFFFFFFFFFFFFFFFFFF  
@A00155:342:HHGFNDSXY:1:1269:12066:32127 2:N:0:GAACCTAG+TCCGCATA  
CGCTTCACCATCATTTAACACATCGTATCTTCCTCTTATCGATGTGAATTGAGGATACACCACCTTCC

AATCCATCTGCAGCCACACGCATGCTTCCGCCGTTGATGGCACGAACTGGTATGCCGCAAAACCTATG  
+  
FFFFFFFFFFFFFFFF:FFFFFFFFFFFFFFFF:FFF:FFFF:FFFFFFFFFFFFFFFF  
FF:FFFF:FFFFFFFFFFFFFFFFFFFFFFFFFFFFFFFFFFFFFFFF:FFFFFF  
@A00155:342:HHGFNDSXY:1:1608:20211:24690 1:N:0:GAACCTAG+TCCGCATA  
CGCTTCACCATCATTTAACACATCGTATCTTCCTCTTATCGATGTGAATTGAGGATACACCACCTTCC  
AATCCATCTGCAGCCACACGCATGCTTCCGCCGTTGATGGCACGAACTGGTATGCCGCAAAACCTATG  
+  
FFFFFFFFFFFFFFFF:FFFFF,FFFFFFFFFFFFFFFF:FFFFFFFFFFFFFFFFFFFFFFFF  
FFFFFFFFFFFFFFFFFFFFFFFFFFFFFFFFFFFFFFFFFFFFFFFF:FFFFFFFF,FFFFF  
@A00155:342:HHGFNDSXY:1:2364:32931:29997 2:N:0:GAACCTAG+TCCGCATA  
ACCATCATTTAACACATCGTATCTTCCTCTTATCGATGTGAATTGAGGATACACCACCTTCCAATCCA  
TCTGCAGCCACACGCATGCTTCCGCCGTTGATGGCACGAACTGGTATGCCGCAAAACCTATGATGTAC  
+  
FFFFFFFFFFFFFFFFFFFFFFFFFFFFFFFFFFFFFFFFFFFFFFFFFFFFFFFFFFFFFFFF  
FFFFFFFFF:FFFFFFFFFFFFFFFFFFFFFFFFFFFFFFFFFFFFFFFFFFFFFFFFFFFFFFFF  
@A00155:342:HHGFNDSXY:1:2139:21251:15906 2:N:0:GAACCTAG+TCCGCATA  
CATCATTTAACACATCGTATCTTCCTCTTATCGATGTGAATTGAGGATACACCACCTTCCAATCCATC  
TGCAGCCACACGCATGCTTCCGCCGTTGATGGCACGAACTGGTATGCCGCAAAACCTATGATGTACAG  
+  
FFFFFFFFFFFFFFFFFFFF,FFFFFFFFFFFF,FFF,FFFFF:FFFFFFFFFFFFFFFFFFFF,FFFFF  
FFFFFFFFFFFFFFFFFFFF:FFFFFFFFF:FFFFFFFFFFFFFFFFFFFFFFFFFFFFFFFFFFFF  
@A00155:342:HHGFNDSXY:1:1406:9959:26287 2:N:0:GAACCTAG+TCCGCATA  
ATCATTTAACACATCGTATCTTCCTCTTATCGATGTGAATTGAGGATACACCACCTTCCAATCCATCT  
GCAGCCACACGCATGCTTCCGCCGTTGATGGCACGAACTGGTATGCCGCAAAACCTATG  
+  
FFFFFFFFFFFFFFF:FFFFFFFFFFFFFFFFFFFF:FFFFFFFFFFFFFFFFFFFFFFFFFFFF  
FFFFFFFFFFFFFFFFFFFFFFFFFFFFFFFFFFFFFFFFFFFFFFFFFFFFFFFFFFFF  
@A00155:342:HHGFNDSXY:1:1156:14579:36542 2:N:0:GAACCTAG+TCCGCATA  
ATCATTTAACACATCGTATCTTCCTCTTATCGATGTGAATTGAGGATACACCACCTTCCAATCCATCT  
GCAGCCACACGCATGCTTCCGCCGTTGATGGCACGAACTGGTATGCCGCAAAACCTATGATGTACAGG  
+  
FFFFF:FFFFF:FFFFFFFFFFFFFFFFFFFFFFFFFFFFFFFFFFFFFFFFFFFF:FFFFFFFFFFFF  
FFFFF:F,FFFFFFFF:FFFFFFFFFFFFFFFFFFFFFFFFFFFFFFFFFFFFFFFFFFFF  
@A00155:342:HHGFNDSXY:1:1330:3495:36980 2:N:0:GAACCTAG+TCCGCATA  
TCATTTAACACATCGTATCTTCCTCTTATCGATGTGAATTGAGGATACACCACCTTCCAATCCATCTG  
CAGCCACACGCATGCTTCCGCCGTTGATGGCACGAACTGGTATGCCGCAAAACCTATGATGTACAGGG  
+  
FFFFFFFFFFFFFFFFFFFFFFFFFFFFFFFFFFFF,FFFFFFFFFFFFFFFFFFFFFFFFFFFFF:F  
FFFFF,FFFFFFFFFFFFFFFFFFFFFFFFFFFFFFFFFFFFFFFFFFFF:FFFFFFFFFFFF  
@A00155:342:HHGFNDSXY:1:2374:2510:28573 2:N:0:GAACCTAG+TCCGCATA  
TCATTTAACACATCGTATCTTCCTCTTATCGATGTGAATTGAGGATACACCACCTTCCAATCCATCTG  
CAGCCACACGCATGCTTCCGACGTTGATGGCACGAACTGGTATGCCGCAAAACCTATGATGTACAGGG  
+  
F,FFFFFFFFFFFF,FF,:FFFFFFFFF:FFFFFFFFFFFFFFFFFFFFFFFF:FFF:FFFFFF:FFF  
FFFF:FFF,FFFFFFFF,,FFFF,:FF:F,FFFFFF,FFFFFFFFFFFFFFFFFFFF,FFFFFFFF  
@A00155:342:HHGFNDSXY:1:1177:18611:23578 2:N:0:GAACCTAG+TCCGCATA  
TCATTTAACACATCGTATCTTCCTCTTATCGATGTGAATTGAGGATACACCACCTTCCAATCCATCTG  
CAGCCACACGCATGCTTCCGCCGTTGATGGCACGAACTGGTATGCCGCAAAACCTATGATGTACAGGG  
+  
FFFFFFFFFFFFFFFFFFFFFFFFFFFFFFFFFFFF:FF:FFFFF,FFFFFFFFFFFFFFFF  
FFFFFFFFFFFFF:FFFFFFFFFFFFFFFFFFFFFFFFFFFFFFFFFFFFFFFFFFFF  
@A00155:342:HHGFNDSXY:1:2147:28420:28040 2:N:0:GAACCTAG+TCCGCATA  
CATTTAACACATCGTATCTTCCTCTTATCGATGTGAATTGAGGATACACCACCTTCCAATCCATCTGC

AGCCACACGCATGCTTCCGCCGTTGATGGCACGAACTGGTATGCCGCAAAACCTATGATGTACAGGGC  
+  
FFFFFFFFFFFFFFFF:FFF:FFFFFFFF:FFFFFFFFFFFFFFFFFFFFFFFFFFFFFFFFFFFFFFFF  
FFFFFFFFFFFFFFFF:FFFFFFFFFFFFFFFFFFFFFFFFFFFFFFFFFFFFFFFFFFFFFFFFFFFFFFFF  
@A00155:342:HHGFNDSXY:1:1427:31602:28729 2:N:0:GAACCTAG+TCCGCATA  
CATTTAACACATCGTATCTTCCTCTTATCGATGTGAATTGAGGATACACCACCTTCCAATCCATCTGC  
AGCCACACGCATGCTTCCGCCGTTGATGGCACGAACTGGTATGCCGCAAAACCTATGATGTACAGGGC  
+  
FFFFFFFFF::FFF:FFFFFFFFFFFFFFFFFFFFFFFFFFFFFFFFFFFFFFFFFFFFFFFFFFFFFFF  
FFFF,FFFFFFFFFFFFFFFFFFFFFFFFFFFFFFFFFFFFFFFFFFFFFFFFFFFFFFFFFFFFFFFFF,FFFFFFFFFFFFF  
@A00155:342:HHGFNDSXY:1:2607:19741:17143 2:N:0:GAACCTAG+TCCGCATA  
CATTTAACACATCGTATCTTCCTCTTATCGATGTGAATTGAGGATACACCACCTTCCAATCCATCTGC  
AGCCACACGCATGCTTCCGCCGTTGATGGCACGAACTGGTATGCCGCAAAACCTATGATGTACAGGGC  
+  
FFFFFFFFFFFFFFFFFFFFFFFFFFFF:FFFFFF:FFFFFFFFFFFFFFFFFFFFFFFFFFFFFFFFFFFFF  
FFFFFFFFFFFFFFFFFFFFFFFFFFFFFFFFFFFFFFFFFFFFFFFFFFFFFFFFFFFFFFFFFFFF:FFFFFFFFFFFFF  
@A00155:342:HHGFNDSXY:1:1325:31729:18427 2:N:0:GAACCTAG+TCCGCATA  
CATTTAACACATCGTATCTTCCTCTTATCGATGTGAATTGAGGATACACCACCTTCCAATCCATCTGC  
AGCCACACGCATGCTTCCGCCGTTGATGGCACGAACTGGTATGCCGCAAAACCTATGATGTACAGGGC  
+  
FFFFFFFFFFFFFFFF:FFFFFFFFFFFFFFFFFFFFFFFFFFFFFFFFFFFFFFFFFFFFFFFFFFFFFFFFF  
FFFFFFFFFFFFFFFF:FFFFFFFFFFFFFFFFFFFFFFFFFFFFFFFFFFFFFFFFFFFFFFFFFFFF:FFFFFFFFFFFFF  
@A00155:342:HHGFNDSXY:1:2123:23041:32972 1:N:0:GAACCTAG+TCCGCATA  
ATTTAACACATCGTATCTTCCTCTTATCGATGTGAATTGAGGATACACCACCTTCCAATCCATCTGCA  
GCCACACGCATGCTTCCGCCGTTGATGGCACGAACTGGTATGCCGCAAAACCTATGATG  
+  
FFFFFFFFFFFFFFFFFFFFFFFFFFFFFFFFFFFFFFFFFFFFFFFFFFFFFFFFFFFFFFFFFFFFFFFFF  
FFFFFFFFFFFFFFFFFFFFFFFFFFFFFFFFFFFFFFFFFFFFFFFFFFFFFFFFFFFFFFFFFFFFFFFFF  
@A00155:342:HHGFNDSXY:1:2123:22535:32534 1:N:0:GAACCTAG+TCCGCATA  
ATTTAACACATCGTATCTTCCTCTTATCGATGTGAATTGAGGATACACCACCTTCCAATCCATCTGCA  
GCCACACGCATGCTTCCGCCGTTGATGGCACGAACTGGTATGCCGCAAAACCTATGATG  
+  
FFFFFFFFFFFFFFFFFFFFFFFFFFFF:FFFFFFFFFFFFFFFFFFFFFFFFFFFFFFFFFFFFFFFFFFFFF  
FFFFFFFFFFFFFFFFFFFFFFFFFFFFFFFFFFFFFFFFFFFF,FFFFFFFFFFFFFFFFFFFFFFFFFFFFF  
@A00155:342:HHGFNDSXY:1:1316:29053:34147 1:N:0:GAACCTAG+TCCGCATA  
ATTTAACACATCGTATCTTCCTCTTATCGATGTGAATTGAGGATACACCACCTTCCAATCCATCTGCA  
GCCACACGCATGCTTCCGCCGTTGATGGCACGAACTGGTATGCCGCAAAACCTATGATGTACAGGGCT  
+  
FFFFFFFFFFFFFFFFFFFFFFFFFFFF,:FFFFFFFFFFFFFFFFFFFFFFFFFFFFFFFFFFFFFFFFFFFF:FFFFFFF  
FFFFFFFFFFFFFFFFFFFFFFFFFFFF:FFFFFFFFFFFFF:FFFFFFFFFFFFFFFFFFFFFFFFFFFFF:FF  
@A00155:342:HHGFNDSXY:1:2312:27290:5040 1:N:0:GAACCTAG+TCCGCATA  
ATTTAACACATCGTATCTTCCTCTTATCGATGTGAATTGAGGATACACCACCTTCCAATCCATCTGCA  
GCCACACGCATGCTTCCGCCGTTGATGGCACGAACTGGTATGCCGCAAAACCTATGATGTACAGGGCT  
+  
FFFFFFFFFFFFFFFFFFFFFFFFFFFFFFFFFFFFFFFFFFFFFFFFFFFFFFFFFFFFFFFFFFFFFFFFF  
FFFFFFFFFFFFFFFFFFFFFFFFFFFFFFFFFFFFFFFFFFFFFFFFFFFFFFFFFFFFFFFFFFFFFFFFF  
@A00155:342:HHGFNDSXY:1:2210:26205:20760 1:N:0:GAACCTAG+TCCGCATA  
ATTTAACACATCGTATCTTCCTCTTATCGATGTGAATTGAGGATACACCACCTTCCAATCCATCTGCA  
GCCACACGCATGCTTCCGCCGTTGATGGCACGAACTGGTATGCCGCAAAACCTATGATGTACAGGGCT  
+  
FFFFFFFFFFFFFFFFFFFFFFFFFFFFFFFFFFFFFFFFFFFFFFFFFFFFFFFFFFFFFFFFFFFFFFFFF  
FFFFFFFFFFFFFFFFFFFFFFFFFFFF:FFF:FFFFFFFFFFFFFFFFFFFFFFFFFFFFFFFFFFFF:FFFFFF:FFFFF  
@A00155:342:HHGFNDSXY:1:2526:28501:29434 1:N:0:GAACCTAG+TCCGCATA  
ATTTAACACATCGTATCTTCCTCTTATCGATGTGAATTGAGGATACACCACCTTCCAATCCATCTGCA

GCCACACGCATGCTTCCGCCGTTGATGGCACGAACTGGTATGCCGCAAAACCTATGATGTACAGGGCT  
+  
FFFFFFFFFFFFFFFFFFFFFFFFFFFFFFFFFFFFFFFFFFFFFFFFFFFFFFFFFFFFFFFFFFFFFFFF  
FFFFFFFFFFFFFFFFFFFFFFFFFFFFFFFFFFFFFFFFFFFFFFFFFFFFFFFFFFFFFFFFFFFFFFFF:FFFFFFF  
@A00155:342:HHGFNDSXY:1:2607:19741:17143 1:N:0:GAACCTAG+TCCGCATA  
ATTTAACACATCGTATCTTCCTCTTATCGATGTGAATTGAGGATACACCACCTTCCAATCCATCTGCAG  
GCCACACGCATGCTTCCGCCGTTGATGGCACGAACTGGTATGCCGCAAAACCTATGATGTACAGGGCT  
+  
FFFFFFFFFFFFFFFFFFFFFFFFFFFFFFFFFFFFFFFFFFFFFFFFFFFFFFFFFFFFFFFFFFFFFFFF  
FFFFFFFFFFFF:FFFFFFFFFFFFFFFFFFFFFFFFFFFFFFFFFFFFFFFFFFFFFFFFFFFFFFFFFFFF  
@A00155:342:HHGFNDSXY:1:2172:12418:24815 1:N:0:GAACCTAG+TCCGCATA  
TTTAACACATCGTATCTTCCTCTTATCGATGTGAATTGAGGATACACCACCTTCCAATCCATCTGCAG  
CCACACGCATGCTTCCGCCGTTGATGGCACGAACTGGTATGCCGCAAAACCTATGATGTACAGGGCTG  
+  
FFFFFFFFFFFFFFFFFFFFFFFFFFFFFFFFFFFFFFFFFFFFFFFFFFFFFFFFFFFFFFFFFFFFFFFF  
FFFFFFFFFFFFFFFFFFFFFFFFFFFFFFFFFFFFFFFFFFFFFFFFFFFFFFFFFFFFFFFFFFFFFFFF:FFFFFFF  
@A00155:342:HHGFNDSXY:1:1325:31729:18427 1:N:0:GAACCTAG+TCCGCATA  
TTTAACACATCGTATCTTCCTCTTATCGATGTGAATTGAGGATACACCACCTTCCAATCCATCTGCAG  
CCACACGCATGCTTCCGCCGTTGATGGCACGAACTGGTATGCCGCAAAACCTATGATGTACAGGGCTG  
+  
FFFFFFFFFFFFFFF:FFFFFFFFF:FFFFFFFFFFFF,FFFFF,FFFFFFFFFFFFFFFFFFFFFFFFFFFF  
FF,FFFFFFFFFFFFFFFFFFFFFFFFFFFFFFFFFFFFFFFFFFFFFFFFFFFFFFFFFFFFFFFFFFFF:FFF  
@A00155:342:HHGFNDSXY:1:1334:1542:4006 1:N:0:GAACCTAG+TCCGCATA  
TTTAACACATCGTATCTTCCTCTTATCGATGTGAATTGAGGATACACCACCTTCCAATCCATCTGCAG  
CCACACGCATGCTTCCGCCGTTGATGGCACGAACTGGTATGCCGCAAAACCTATGATGTACAGGGCTG  
+  
FFFF:F:FFFFFFFFFFFFFFFFFFFFFFFFFFFFFFFFFFFFFFFFFFFF,F:FFFFFFFFFFFF:FFFFFFFFFFFF  
FFFF:FFF:FFFFFFFFFFFFFFFFFFFFFFFFFFFF::F:FFFFFF,FFF:F:FFF,FFFFFFFFFFFFFFFFFFFF  
@A00155:342:HHGFNDSXY:1:1156:1280:25880 1:N:0:GAACCTAG+TCCGCATA  
TTTAACACATCGTATCTTCCTCTTATCGATGTGAATTGAGGATACACCACCTTCCAATCCATCTGCAG  
CCACACGCATGCTTCCGCCGTTGATGGCACGAACTGGTATGCCGCAAAACCTATGATGTACAGGGCTG  
+  
FFFFFFFFFFFFFFFFFFFFFFFFFFFF:FFFFFFFFFFFFF,FFFF:FFFFFFFFFFFF,FFFF:FFFFFF:FFFF  
F:FFFFFF:FFFFFFFFFFFFFFFFFFFFFFFFFFFF:FFF::FFFF:,FFFFFFFFF,FFFFFFFFFFFFFFFFFFFF:  
@A00155:342:HHGFNDSXY:1:1427:31602:28729 1:N:0:GAACCTAG+TCCGCATA  
TTTAACACATCGTATCTTCCTCTTATCGATGTGAATTGAGGATACACCACCTTCCAATCCATCTGCAG  
CCACACGCATGCTTCCGCCGTTGATGGCACGAACTGGTATGCCGCAAAACCTATGATGTACAGGGCTG  
+  
FFFFFFFFFFFFFFFFFFFFFFFFFFFF:FFFFFFFFFFFFFFFFFFFFFFFFFFFFFFFFFFFFFFFFFFFF  
FFFFFFFFFFFFFFFFFFFFFFFFFFFFFFFFFFFFFFFFFFFFFFFFFFFFFFFFFFFFFFFFFFFF:FFFFFFFFFFFF  
@A00155:342:HHGFNDSXY:1:2147:28420:28040 1:N:0:GAACCTAG+TCCGCATA  
TAACACATCGTATCTTCCTCTTATCGATGTGAATTGAGGATACACCACCTTCCAATCCATCTGCAGCC  
ACACGCATGCTTCCGCCGTTGATGGCACGAACTGGTATGCCGCAAAACCTATGATGTACAGGGCTGCT  
+  
FFFFFFFFFFFFFFFFFFFFFFFFFFFFFFFFFFFFFFFFFFFFFFFFFFFFFFFFFFFFFFFFFFFFFFFF  
FFFFFFFFFFFFFFFFFFFFFFFFFFFFFFFFFFFFFFFFFFFFFFFFFFFFFFFFFFFFFFFFFFFF:FFFFFFFFFFFF  
@A00155:342:HHGFNDSXY:1:2516:27407:14074 1:N:0:GAACCTAG+TCCGCATA  
TAACACATCGTATCTTCCTCTTATCGATGTGAATTGAGGATACACCACCTTCCAATCCATCTGCAGCC  
ACACGCATGCTTCCGCCGTTGATGGCACGAACTGGTATGCCGCAAAACCTATGATGTACAGGGCTGCT  
+  
FFFFFFFFFFFFFFFFFFFFFFFFFFFFFFFFFFFFFFFFFFFFFFFFFFFFFFFFFFFFFFFFFFFFFFFF  
FFFFFFFFFFFFFFFFFFFFFFFFFFFFFFFFFFFFFFFFFFFFFFFFFFFFFFFFFFFFFFFFFFFF:FFFFFFF  
@A00155:342:HHGFNDSXY:1:2366:18936:35321 1:N:0:GAACCTAG+TCCGCATA  
CATCGTATCTTCCTCTTATCGATGTGAATTGAGGATACACCACCTTCCAATCCATCTGCAGCCACACG

CATGCTTCCGCCGTTGATGGCACGAACTGGTATGCCGCAAAACCTATGATGTACAGGGCTGCTGAAAA  
+  
FFFFFFFFFFFFFFFFFFFFFFFFFFFFFFFFFFFFFFFFFFFFFFFFFFFFFFFFFFFFFFFFFFFFFFFF  
FFFFFFFFFFFFFFFFFFFFFFFFFFFFFFFFFFFFFFFFFFFFFFFFFFFFFFFFFFFFFFFFFFFFFFFF  
@A00155:342:HHGFNDSXY:1:2142:2067:24048 2:N:0:GAACCTAG+TCCGCATA  
ATCGTATCTTCCTCTTATCGATGTGAATTGAGGATACACCACCTTCCAATCCATCTGCAGCCACACGC  
ATGCTTCCGCCGTTGATGGCACGAACTGGTATGCCGCAAAACCTATGATGTACAGGGCTGCTGAAAAC  
+  
:FFFFFFFFFFFFFFFFFFFFFFFFFFFFFFFFFFFFFFFFFFFFFFFFFFFFFFFFFFFFFFFFFFFFFFFF  
FFFFFFFFFFFFFFFFFFFFFFFFFFFFFFFFFFFFFFFFFFFFFFFFFFFFFFFFFFFFFFFFFFFFFFFF  
@A00155:342:HHGFNDSXY:1:2526:28501:29434 2:N:0:GAACCTAG+TCCGCATA  
TCGTATCTTCCTCTTATCGATGTGAATTGAGGATACACCACCTTCCAATCCATCTGCAGCCACACGCA  
TGCTTCCGCCGTTGATGGCACGAACTGGTATGCCGCAAAACCTATGATGTACAGGGCTGCTGAAAAC  
+  
FFFFFFFFFFFFFFFFFFFFFFFFFFFFFFFFFFFFFFFFFFFFFFFFFFFFFFFFFFFFFFFFFFFFFFFF  
FFF:FFFFFFFFFFFFFFFFFFFFFFFFFFFFFFFFFFFFFFFFFFFFFFFFFFFFFFFFFFFFFFFFFFFF  
@A00155:342:HHGFNDSXY:1:2471:13367:10019 1:N:0:GAACCTAG+TCCGCATA  
TCGTATCTTCCTCTTATCGATGTGAATTGAGGATACACCACCTTCCAATCCATCTGCAGCCACACGCA  
TGCTTCCGCCGTTGATGGCACGAACTGGTATGCCGCAAAACCTATGATGTACAGGGCTGCTGAAAAC  
+  
FFF:FFFFFFFFFFFFFFFFFFFFFFFFFFFFFFFFFFFFFFFFFFFFFFFFFFFFFFFFFFFFFFFFFFFF  
FFFFFFFFFFFFFFFFFFFFFFFFFFFFFFFFFFFFFFFFFFFFFFFFFFFFFFFFFFFFFFFFFFFFFFFF  
@A00155:342:HHGFNDSXY:1:1138:18050:34413 1:N:0:GAACCTAG+TCCGCATA  
TCGTATCTTCCTCTTATCGATGTGAATTGAGGATACACCACCTTCCAATCCATCTGCAGCCACACGCA  
TGCTTCCGCCGTTGATGGCACGAACTGGTATGCCGCAAAACCTATGATGTACAGGGCTGCTGAAAAC  
+  
FFFFFFFFFFFFFFFFFFFFFFFFFFFFFFFFFFFFFFFFFFFFFFFFFFFFFFFFFFFFFFFFFFFFFFFF  
FFFFFFFFFFFFFFFFFFFFFFFFFFFFFFFFFFFFFFFFFFFFFFFFFFFFFFFFFFFFFFFFFFFFFFFF  
@A00155:342:HHGFNDSXY:1:2646:28393:24017 1:N:0:GAACCTAG+TCCGCATA  
CGTATCTTCCTCTTATCGATGTGAATTGAGGATACACCACCTTCCAATCCATCTGCAGCCACACGCAT  
GCTTCCGCCGTTGATGGCACGAACTGGTATGCCGCAAAACCTATGATGTACAGGGCTGCTGAAAAC  
+  
FFF:FFFFFFFFFFFFFFFFFFFFFFFFFFFFFFFFFFFFFFFFFFFFFFFFFFFFFFFFFFFFFFFFFFFF  
FFFFFFFFFFFFFFFFFFFFFFFFFFFFFFFFFFFFFFFFFFFFFFFFFFFFFFFFFFFFFFFFFFFFFFFF  
@A00155:342:HHGFNDSXY:1:1406:9959:26287 1:N:0:GAACCTAG+TCCGCATA  
GTATCTTCCTCTTATCGATGTGAATTGAGGATACACCACCTTCCAATCCATCTGCAGCCACACGCATG  
CTTCCGCCGTTGATGGCACGAACTGGTATGCCGCAAAACCTATGATGTACAGGGCTGCT  
+  
FFFFFFFFFFFF,FFFFFFFFFFFFFFFFFFFFFFFFFFFFFFFFFFFFFFFFFFFFFFFFFFFFFFFFFFFF  
FFFFFFFFFFFFFFFFFFFFFFFFFFFFFFFFFFFFFFFFFFFFFFFFFFFFFFFFFFFFFFFFFFFFFFFF  
@A00155:342:HHGFNDSXY:1:1156:14579:36542 1:N:0:GAACCTAG+TCCGCATA  
GTATCTTCCTCTTATCGATGTGAATTGAGGATACACCACCTTCCAATCCATCTGCAGCCACACGCATG  
CTTCCGCCGTTGATGGCACGAACTGGTATGCCGCAAAACCTATGATGTACAGGGCTGCTGAAAAC  
+  
FFFFFFFFFFFFFFFFFFFFFFFFFFFFFFFFFFFFFFFFFFFFFFFFFFFFFFFFFFFFFFFFFFFFFFFF  
FFFFFFFFFFFFFFFFFFFFFFFFFFFFFFFFFFFFFFFFFFFFFFFFFFFFFFFFFFFFFFFFFFFFFFFF  
@A00155:342:HHGFNDSXY:1:2314:23873:23766 1:N:0:GAACCTAG+TCCGCATA  
GTATCTTCCTCTTATCGATGTGAATTGAGGATACACCACCTTCCAATCCATCTGCAGCCACACGCATG  
CTTCCGCCGTTGATGGCACGAACTGGTATGCCGCAAAACCTATGATGTACAGGGCTGCTGAAAAC  
+  
FFFFFFFFFFFFFFFFFFFFFFFFFFFFFFFFFFFFFFFFFFFFFFFFFFFFFFFFFFFFFFFFFFFFFFFF  
FFFFFFFFFFFFFFFFFFFFFFFFFFFFFFFFFFFFFFFFFFFFFFFFFFFFFFFFFFFFFFFFFFFFFFFF  
@A00155:342:HHGFNDSXY:1:2274:23963:16595 1:N:0:GAACCTAG+TCCGCATA  
GTATCTTCCTCTTATCGATGTGAATTGAGGATACACCACCTTCCAATCCATCTGCAGCCACACGCATG

CTTCCGCCGTTGATGGCACGAACTGGTATGCCGCAAAACCTATGATGTACAGGGCTGCTGAAAACCTGG  
+  
FFFFFFFFFFFF,FFFFFFFFFFFFFFFFFFFFFFFF:FFF,FFFFFFFFFFFF,FFFFFFFFFFFF  
FF:FFFFFFFF,FFFFFFFFFFFF:F,FFFFFFFFFFFFFFFF:FFFFFF,FFFFFFFFFFFF:FF  
@A00155:342:HHGFNDSXY:1:1206:31403:18803 1:N:0:GAACCTAG+TCCGCATA  
GTATCTTCCTCTTATCGATGTGAATTGAGGATACACCACCTTCCAATCCATCTGCAGCCACACGCATG  
CTTCCGCCGTTGATGGCACGAACTGGTATGCCGCAAAACCTATGATGTACAGGGCTGCTGAAAACCTGG  
+  
FFFFFFFFFFFFFFFF:FFFF,FF:FFFFFFFFFFFFFFFFFFFFFFFFFFFFFFFFFFFFFFFFFFFF  
FFFFFFFFFFFFFFFFFFFFFFFFFFFFFFFFFFFFFFFFFFFFFFFFFFFFFFFFFFFFFFFFFFFF,FFFFF  
@A00155:342:HHGFNDSXY:1:2229:20410:32299 1:N:0:GAACCTAG+TCCGCATA  
GTATCTTCCTCTTATCGATGTGAATTGAGGATACACCACCTTCCAATCCATCTGCAGCCACACGCATG  
CTTCCGCCGTTGATGGCACGAACTGGTATGCCGCAAAACCTATGATGTACAGGGCTGCTGAAAACCTGG  
+  
FFF:FFF:FFFFFFFF:FFFF:F:FFFFFFFF:FFFFFFFFFFFFFFFF:FFFFFFFFFFFFFFFF:FF  
FFFFFF:FFFFFFFFFFFFFFFFFFFFFFFFFFFFFFFFFFFFFFFFFFFFFFFF:FF:FFFFFF:FFFFFF:  
@A00155:342:HHGFNDSXY:1:1107:14570:29230 2:N:0:GAACCTAG+TCCGCATA  
TCTTCCTCTTATCGATGTGAATTGAGGATACACCACCTTCCAATCCATCTGCAGCCACACGCATGCTT  
CCGCCGTTGATGGCACGAACTGGTATGCCGCAAAACCTATGATGTACAGGGCTGCTGAAAACCTGGTCA  
+  
FFFFFFF:FFFFFFFFFFFFFFFFFFFFFFFFFFFFFFFFFFFFFFFFFFFFFFFF:FFFFFFF:F  
FFFFFFFFFFFFFFFFFFFFFFFF:FFFFFFFFFFFFFFFFFFFFFFFFFFFFFFFFFFFFFFFFFFFFFFFF  
@A00155:342:HHGFNDSXY:1:1650:14253:29935 2:N:0:GAACCTAG+TCCGCATA  
TCTTCCTCTTATCGATGTGAATTGAGGATACACCACCTTCCAATCCATCTGCAGCCACACGCATGCTT  
CCGCCGTTGATGGCACGAACTGGTATGCCGCAAAACCTATGATGTACAGGGCTGCTGAAAACCTGGTCA  
+  
FFFFFFFFFFFFFFFFFFFF:FFFFFFFFFFFFFFFFFFFFFFFFFFFFFFFF:FFFFFFFFFFFFFFFFFFFF  
FFFFFFFFFFFFFFFFFFFFFFFFFFFFFFFFFFFFFFFFFFFFFFFFFFFFFFFFFFFFFFFF:FFFFFFFFFFFF  
@A00155:342:HHGFNDSXY:1:1107:15203:29857 2:N:0:GAACCTAG+TCCGCATA  
TCTTCCTCTTATCGATGTGAATTGAGGATACACCACCTTCCAATCCATCTGCAGCCACACGCATGCTT  
CCGCCGTTGATGGCACGAACTGGTATGCCGCAAAACCTATGATGTACAGGGCTGCTGAAAACCTGGTCA  
+  
:FFFFFFFFFFFF:FFFFFFFFFFFFFFFFFFFFFFFFFFFFFFFF:FFFFFFFFFFFFFFFFFFFF  
FFFFFFFFFFFFFFFFFFFFFFFF:FFFFFFFFFFFFFFFFFFFFFFFFFFFFFFFFFFFFFFFFFFFF  
@A00155:342:HHGFNDSXY:1:2345:21441:14732 2:N:0:GAACCTAG+TCCGCATA  
CTTCCTCTTATCGATGTGAATTGAGGATACACCACCTTCCAATCCATCTGCAGCCACACGCATGCTTC  
CGCCGTTGATGGCACGAACTGGTATGCCGCAAAACCTATGATGTACAGGGCTGCTGAAA  
+  
FFFFFFF:FFFFFFFFFFFFFFFFFFFFFFFFFFFFFFFF:FFFFFFFFFFFFFFFFFFFF:FFFFFFF  
FFFFFFFFFFFFFFFFFFFFFFFFFFFFFFFFFFFFFFFFFFFFFFFFFFFFFFFFFFFFFFFFFFFF  
@A00155:342:HHGFNDSXY:1:2108:16938:21371 2:N:0:GAACCTAG+TCCGCATA  
CTTCCTCTTATCGATGTGAATTGAGGATACACCACCTTCCAATCCATCTGCAGCCACACGCATGCTTC  
CGCCGTTGATGGCACGAACTGGTATGCCGCAAAACCTATGATGTACAGGGCTGCTGAAAACCTGGTCAT  
+  
FFFF:FFF,FFFFFFFFFFFFFFFFFFFF:FFFFFFFFFFFF:FFFFF:FFFF, :FFFFFF::FF  
FF:F:FFFFFFFFFFFFFFFF:FF:FFFFFF::F:FFFFFFFFFFFFFFFF:FFFFFFFFFFFFFFFF  
@A00155:342:HHGFNDSXY:1:2516:27407:14074 2:N:0:GAACCTAG+TCCGCATA  
CTTCCTCTTATCGATGTGAATTGAGGATACACCACCTTCCAATCCATCTGCAGCCACACGCATGCTTC  
CGCCGTTGATGGCACGAACTGGTATGCCGCAAAACCTATGATGTACAGGGCTGCTGAAAACCTGGTCAT  
+  
F:FFFFFF:FFFFFF:FFFFFFFFFFFFFFFFFFFF, :FFFFFFFFFFFFFFFFFFFF:FFFFFFFFFFFF  
FFFFFFFFFFFFFFFFFFFFFFFFFFFFFFFFFFFFFFFFFFFFFFFFFFFFFFFFFFFFFFFFFFFF:FFFFF  
@A00155:342:HHGFNDSXY:1:1370:4788:14105 2:N:0:GAACCTAG+TCCGCATA  
CTTCCTCTTATCGATGTGAATTGAGGATACACCACCTTCCAATCCATCTGCAGCCACACGCATGCTTC

CGCCGTTGATGGCACGAACTGGTATGCCGCAAAACCTATGATGTACAGGGCTGCTGAAAACCTGGTCAT  
+  
FFFFF:FFFFFFFFFFFFFFFFFFFFFFFFFFFFFFFFFFFFFFFFFFFFFFFFFFFFFFFFFFFFFFFF  
FFFFFFFFFFFFFFFFFFFFFFFFFFFFFFFFFFFFFFFFFFFFFFFFFFFFFFFFFFFFFFFFFFFFFFFF  
@A00155:342:HHGFNDSXY:1:2623:3414:24345 2:N:0:GAACCTAG+TCCGCATA  
TTCCTCTTATCGATGTGAATTGAGGATACACCACCTTCCAATCCATCTGCAGCCACACGCATGCTTCC  
GCCGTTGATGGCACGAACTGGTATGCCGCAAAACCTATGATGTACAGGGCTGCTGAAAACCTGGTCAT  
+  
FFFFFFFF,FFFFFFFFFFFFFFFFFFFFFFFFFFFFFFFFFFFFFFFFFFFFFFFFFFFFFFFFFFFF  
FFFFFFFFFFFF,FFFFFFFFFFFFFFFFFFFFFFFFFFFFFFFFFFFFFFFFFFFFFFFFFFFFFFFFFFFF  
@A00155:342:HHGFNDSXY:1:2238:18982:7717 2:N:0:GAACCTAG+TCCGCATA  
CTCTTATCGATGTGAATTGAGGATACACCACCTTCCAATCCATCTGCAGCCACACGCATGCTTCCGCC  
GTTGATGGCACGAACTGGTATGCCGCAAAACCTATGATGTACAGGGCTGCTGAAAACCTGGTCA  
+  
FFFFF,FFFFFFFFFFFFFFFFFFFFFFFFFFFFFFFFFFFFFFFFFFFFFFFFFFFFFFFFFFFFFFFF  
FFFFFFFFFFFFFFFFFFFFFFFFFFFFFFFFFFFFFFFFFFFFFFFFFFFFFFFFFFFFFFFFFFFFFFFF  
@A00155:342:HHGFNDSXY:1:1312:16947:19413 2:N:0:GAACCTAG+TCCGCATA  
CTCTTATCGATGTGAATTGAGGATACACCACCTTCCAATCCATCTGCAGCCACACGCATGCTTCCGCC  
GTTGATGGCACGAACTGGTATGCCGCAAAACCTATGATGTACAGGGCTGCTGAAAACCTGGTCA  
+  
,FF:FFFFFFFFFFFFFFFFFFFFFFFFFFFFFFFFFFFFFFFFFFFFFFFFFFFFFFFFFFFFFFFF  
FFFFFFFFFFFFFFFFFFFFFFFFFFFFFFFFFFFFFFFFFFFFFFFFFFFFFFFFFFFFFFFFFFFFFFFF  
@A00155:342:HHGFNDSXY:1:1674:26711:31720 2:N:0:GAACCTAG+TCCGCATA  
CTCTTATCGATGTGAATTGAGGATACACCACCTTCCAATCCATCTGCAGCCACACGCATGCTTCCGCC  
GTTGATGGCACGAACTGGTATGCCGCAAAACCTATGATGTACAGGGCTGCTGAAAACCTGGTCAT  
+  
FFFFFFFFFFFFFFFFFFFFFFFFFFFFFFFFFFFFFFFFFFFFFFFFFFFFFFFFFFFFFFFFFFFF  
FFFFFFFFFFFFFFFFFFFFFFFFFFFFFFFFFFFFFFFFFFFFFFFFFFFFFFFFFFFFFFFFFFFFFFFF  
@A00155:342:HHGFNDSXY:1:2133:30237:10300 2:N:0:GAACCTAG+TCCGCATA  
CTCTTATCGATGTGAATTGAGGATACACCACCTTCCAATCCATCTGCAGCCACACGCATGCTTCCGCC  
GTTGATGGCACGAACTGGTATGCCGCAAAACCTATGATGTACAGGGCTGCTGAAAACCTGGTCATAAAG  
+  
FFFFFFFFFFFFFFFFFFFFFFFFFFFFFFFFFFFFFFFFFFFFFFFFFFFFFFFFFFFFFFFFFFFF  
FFFFF:FFFFFFFFFFFFFFFFFFFFFFFFFFFFFFFFFFFFFFFFFFFFFFFFFFFFFFFFFFFFFFFF  
@A00155:342:HHGFNDSXY:1:2243:27037:27367 2:N:0:GAACCTAG+TCCGCATA  
CTCTTATCGATGTGAATTGAGGATACACCACCTTCCAATCCATCTGCAGCCACACGCATGCTTCCGCC  
GTTGATGGCACGAACTGGTATGCCGCAAAACCTATGATGTACAGGGCTGCTGAAAACCTGGTCATAAAG  
+  
FFFFFFFFFFFFFFFFFFFFFFFFFFFFFFFFFFFFFFFFFFFFFFFFFFFFFFFFFFFFFFFFFFFF  
:FFFFFFFF:FFFFFFFF:FFFFFFFFFFFFFFFFFFFFFFFFFFFFFFFFFFFFFFFFFFFFFFFFFFFF  
@A00155:342:HHGFNDSXY:1:2131:3803:2503 2:N:0:GAACCTAG+TCCGCATA  
TCTTATCGATGTGAATTGAGGATACACCACCTTCCAATCCATCTGCAGCCACACGCATGCTTCCGCCG  
TTGATGGCACGAACTGGTATGCCGCAAAACCTATGATGTACAGGGCTGCTGAAAACCTGGTCATAAAGC  
+  
FF:FFFFFFFF,FFFFFFFFFFFFFF,FFFFFFFFFFFFFFFFFFFFFFFFFFFFFFFFFFFFFFFFFFFF  
FFFFFFFF:FFFFFFFFFFFFFFFFFFFFFFFFFFFFFFFFFFFFFFFFFFFFFFFFFFFFFFFFFFFF,  
:FFFFFFFF:FFF  
@A00155:342:HHGFNDSXY:1:2131:4643:2832 2:N:0:GAACCTAG+TCCGCATA  
TCTTATCGATGTGAATTGAGGATACACCACCTTCCAATCCATCTGCAGCCACACGCATGCTTCCGCCG  
TTGATGGCACGAACTGGTATGCCGCAAAACCTATGATGTACAGGGCTGCTGAAAACCTGGTCATAAAGC  
+  
FFFFFFFFFFFFFFFF:FFFFFFFFFFFFFFFFFFFFFFFFFFFFFFFFFFFFFFFFFFFFFFFFFFFF  
FFFFFFFFFFFFFFFFFFFFFFFFFFFFFFFFFFFFFFFFFFFFFFFFFFFFFFFFFFFF,FF:FFFFFFFFFFFF  
@A00155:342:HHGFNDSXY:1:1325:30391:30953 2:N:0:GAACCTAG+TCCGCATA  
TCTTATCGATGTGAATTGAGGATACACCACCTTCCAATCCATCTGCAGCCACACGCATGCTTCCGCCG



TTGATGGCACGAACTGGTATGCCGCAAAACCTATGATGTACAGGGCTGCTGAAAACCTGGTCATAAAGC  
+  
FFFFFFFFFFFFFFFFFFFFFFFFFFFFFFFFFFFFFFFFFFFFFFFFFFFFFFFFFFFFFFFFFFFFFFFF  
FFFFFFFFFFFFFFFFFFFFFFFFFFFFFFFFFFFFFFFFFFFFFFFFFFFFFFFFFFFFFFFFFFFFFFFF  
@A00155:342:HHGFNDSXY:1:2541:16785:23202 1:N:0:GAACCTAG+TCCGCATA  
TATCGATGTGAATTGAGGATACACCACCTTCCAATCCATCTGCAGCCACACGCATGCTTCCGCCGTTG  
ATGGCACGAACTGGTATGCCGCAAAACCTATGATGTACAGGGCTGCTGAAAACCTGGTCATAAAGCCGG  
+  
FFFFFFFFFFFFFFFFFFFFFFFFFFFFFFFFFFFFFFFFFFFFFFFFFFFFFFFFFFFFFFFFFFFFFFFF  
FFFFFFFFFFFFFFFFFFFFFFFFFFFFFFFFFFFFFFFFFFFFFFFFFFFFFFFFFFFFFFFFFFFFFFFF  
@A00155:342:HHGFNDSXY:1:2142:2067:24048 1:N:0:GAACCTAG+TCCGCATA  
TATCGATGTGAATTGAGGATACACCACCTTCCAATCCATCTGCAGCCACACGCATGCTTCCGCCGTTG  
ATGGCACGAACTGGTATGCCGCAAAACCTATGATGTACAGGGCTGCTGAAAACCTGGTCATAAAGCCGG  
+  
FFFFFFFFFFFFFFFFFFFFFFFFFFFFFFFFFFFFFFFFFFFFFFFFFFFFFFFFFFFFFFFFFFFFFFFF  
FFFFFFFFFFFFFFFFFFFFFFFFFFFFFFFFFFFFFFFFFFFFFFFFFFFFFFFFFFFFFFFFFFFFFFFF:FF  
@A00155:342:HHGFNDSXY:1:1107:14570:29230 1:N:0:GAACCTAG+TCCGCATA  
TATCGATGTGAATTGAGGATACACCACCTTCCAATCCATCTGCAGCCACACGCATGCTTCCGCCGTTG  
ATGGCACGAACTGGTATGCCGCAAAACCTATGATGTACAGGGCTGCTGAAAACCTGGTCATAAAGCCGG  
+  
FFFFFFFFFFFFFF:FFFFFFFFFFFFFFFFFFFFFFFFFFFFFFFFFFFFFFFFFFFFFFFFFFFFFFFF  
:FFFFFFFFFFFFFFFFFFFFFFFFFFFFFFFFFFFFFFFFFFFFFFFFFFFFFFFFFFFFFFFFFFFFFFF  
@A00155:342:HHGFNDSXY:1:1107:15203:29857 1:N:0:GAACCTAG+TCCGCATA  
TATCGATGTGAATTGAGGATACACCACCTTCCAATCCATCTGCAGCCACACGCATGCTTCCGCCGTTG  
ATGGCACGAACTGGTATGCCGCAAAACCTATGATGTACAGGGCTGCTGAAAACCTGGTCATAAAGCCGG  
+  
FFFFFFFFFFFFFFFFFFFFFFFFFFFFFFFFFFFFFFFFFFFFFFFFFFFFFFFFFFFFFFFFFFFFFFFF  
FFFFFFFFFFFFFFFFFFFFFFFFFFFFFFFFFFFFFFFFFFFFFFFFFFFFFFFFFFFFFFFFFFFFFFFF  
@A00155:342:HHGFNDSXY:1:1205:1651:34695 1:N:0:GAACCTAG+TCCGCATA  
TCGATGTGAATTGAGGATACACCACCTTCCAATCCATCTGCAGCCACACGCATGCTTCCGCCGTTGAT  
GGCACGAACTGGTATGCCGCAAAACCTATGATGTACAGGGCTGCTGAAAACCTGGTCATAAAGCCGTT  
+  
FFFFFFFFFFFFFFFFFFFFFFFF:F,:FFF,FFFFFF:FFFF:F:FFFFFF,FFFFFFFFFFFFFFFF  
FFFFFF:FFFFFFFF:FFF:FFFFFFFFFFFFFFFF:FFFFFFF::F,FFFFFFFF:F,FFFFFF  
@A00155:342:HHGFNDSXY:1:2345:21441:14732 1:N:0:GAACCTAG+TCCGCATA  
GTGAATTGAGGATACACCACCTTCCAATCCATCTGCAGCCACACGCATGCTTCCGCCGTTGATGGCAC  
GAACTGGTATGCCGCAAAACCTATGATGTACAGGGCTGCTGAAAACCTGGTCATAAAGCC  
+  
FFFFFFFFFFFFFFFFFFFFFFFFFFFFFFFFFFFFFFFFFFFFFFFFFFFFFFFFFFFFFFFFFFFFFFFF  
FFFFFFFF,FFFFFFFFFFFF:FFFFFFFFFFFFFFFFFFFFFFFFFFFFFFFFFFFFFFFFFFFFF  
@A00155:342:HHGFNDSXY:1:2312:28763:16642 1:N:0:GAACCTAG+TCCGCATA  
GTGAATTGAGGATACACCACCTTCCAATCCATCTGCAGGCACACGCATGCTTCCGCCGTTGATGGCAC  
GAACTGGTATGCCGCAAAACCTATGATGTACAGGGCTGCTGAAAACCTGGTCATAAAGCCGTTTGGC  
+  
FFFFFFFFFFFF:FFFFFFFFFFFFFFFFFFFFFFFFFFFFFFFFFFFFFFFFFFFFFFFFFFFFFFFF  
FFFFFFFFFFFFFFFFFFFFFFFFFFFFFFFFFFFFFFFFFFFFFFFFFFFFFFFFFFFFFFFFFFFF,F  
@A00155:342:HHGFNDSXY:1:1316:29053:34147 2:N:0:GAACCTAG+TCCGCATA  
GAATTGAGGATACACCACCTTCCAATCCATCTGCAGCCACACGCATGCTTCCGCCGTTGATGGCACGA  
ACTGGTATGCCGCAAAACCTATGATGTACAGGGCTGCTGAAAACCTGGTCATAAAGCCGTTTGGCCT  
+  
FFFFFFFFFFFFFFFFFFFFFFFFFFFFFFFFFFFFFFFFFFFF:FFFFFFFFFFFFFFFF:FFFFFFFF  
FFFFFFFFFFFFFFFFFFFF,FFFFFFFFFFFFFFFFFFFFFFFFFFFFFFFFFFFF,FFFFFFFFFFFF  
@A00155:342:HHGFNDSXY:1:2312:27290:5040 2:N:0:GAACCTAG+TCCGCATA  
GAATTGAGGATACACCACCTTCCAATCCATCTGCAGCCACACGCATGCTTCCGCCGTTGATGGCACGA

ACTGGTATGCCGCAAAACCTATGATGTACAGGGCTGCTGAAAACCTGGTCATAAAGCCGGTTTTGCCCT  
+  
FFFFFFFFFFFFFFFFFFFFFFFFFFFFFFFFFFFFFFFFFFFFFFFFFFFFFFFFFFFFFFFFFFFFFFFF  
FFFFFFFFFFFFFFFFFFFFFFFFFFFFFFFFFFFFFFFFFFFFFFFFFFFFFFFFFFFFFFFFFFFFFFFF:  
@A00155:342:HHGFNDSXY:1:2210:26205:20760 2:N:0:GAACCTAG+TCCGCATA  
GAATTGAGGATACACCACCTTCCAATCCATCTGCAGCCACACGCATGCTTCCGCCGTTGATGGCACGA  
ACTGGTATGCCGCAAAACCTATGATGTACAGGGCTGCTGAAAACCTGGTCATAAAGCCGGTTTTGCCCT  
+  
FFFFFFFFFFFFFFFFFFFFFFFFFFFFFFFFFFFFFFFFFFFFFFFFFFFFFFFFFFFFFFFFFFFFFFFF,FFF  
FFFFFFFFFFFFFFFFFFFFFFFFFFFFFFFFFFFFFFFFFFFFFFFFFFFFFFFFFFFFFFFFFFFFFFFF:  
@A00155:342:HHGFNDSXY:1:1312:16947:19413 1:N:0:GAACCTAG+TCCGCATA  
ATTGAGGATACACCACCTTCCAATCCATCTGCAGCCACACGCATGCTTCCGCCGTTGATGGCACGAAC  
TGGTATGCCGCAAAACCTATGATGTACAGGGCTGCTGAAAACCTGGTCATAAAGCCGGTTTTGC  
+  
FFFFFFFFFFFFFFFFFFFFFFFFFFFFFFFFFFFFFFFFFFFFFFFFFFFFFFFFFFFFFFFFFFFFFFFF  
FFFFFFFFFFFFFFFFFFFFFFFFFFFFFFFFFFFFFFFFFFFFFFFFFFFFFFFFFFFFFFFFFFFFFFFF:  
@A00155:342:HHGFNDSXY:1:2238:18982:7717 1:N:0:GAACCTAG+TCCGCATA  
ATTGAGGATACACCACCTTCCAATCCATCTGCAGCCACACGCATGCTTCCGCCGTTGATGGCACGAAC  
TGGTATGCCGCAAAACCTATGATGTACAGGGCTGCTGAAAACCTGGTCATAAAGCCGGTTTTGC  
+  
FFFFFFFFFFFFFFFFFFFFFFFFFFFFFFFFFFFFFFFFFFFFFFFFFFFFFFFFFFFFFFFFFFFFFFFF  
FFFFFFFFFFFFFFFFFFFFFFFFFFFFFFFFFFFFFFFFFFFFFFFFFFFFFFFFFFFFFFFFFFFFFFFF:  
@A00155:342:HHGFNDSXY:1:1674:26711:31720 1:N:0:GAACCTAG+TCCGCATA  
ATTGAGGATACACCACCTTCCAATCCATCTGCAGCCACACGCATGCTTCCGCCGTTGATGGCACGAAC  
TGGTATGCCGCAAAACCTATGATGTACAGGGCTGCTGAAAACCTGGTCATAAAGCCGGTTTTGCC  
+  
FFFFFFFFFFFFFFFFFFFFFFFFFFFFFFFFFFFFFFFFFFFFFFFFFFFFFFFFFFFFFFFFFFFFFFFF  
FFFFFFFFFFFFFFFFFFFFFFFFFFFFFFFFFFFFFFFFFFFFFFFFFFFFFFFFFFFFFFFFFFFFFFFF,  
@A00155:342:HHGFNDSXY:1:2410:1479:23343 1:N:0:GAACCTAG+TCCGCATA  
ATTGAGGATACACCACCTTCCAATCCATCTGCAGCCACACGCATGCTTCCGCCGTTGATGGCACGAAC  
TGGTATGCCGCAAAACCTATGATGTACAGGGCTGCTGAAAACCTGGTCATAAAGCCGGTTTTGCCCTAC  
+  
FFFFFFFFFFFFFFFFFFFFFFFFFFFFFFFFFFFFFFFFFFFFFFFFFFFFFFFFFFFFFFFFFFFFFFFF  
FFFFFFFFFFFFFFFFFFFFFFFFFFFFFFFFFFFFFFFFFFFFFFFFFFFFFFFFFFFFFFFFFFFFFFFF,  
@A00155:342:HHGFNDSXY:1:2447:1579:25927 1:N:0:GAACCTAG+TCCGCATA  
ATTGAGGATACACCACCTTCCAATCCATCTGCAGCCACACGCATGCTTCCGCCGTTGATGGCACGAAC  
TGGTATGCCGCAAAACCTATGATGTACAGGGCTGCTGAAAACCTGGTCATAAAGCCGGTTTTGCCCTAC  
+  
FFFFFFFFFFFFFFFFFFFFFFFFFFFFFFFFFFFFFFFFFFFFFFFFFFFFFFFFFFFFFFFFFFFFFFFF  
FFFFFFFFFFFFFFFFFFFFFFFFFFFFFFFFFFFFFFFFFFFFFFFFFFFFFFFFFFFFFFFFFFFFFFFF,  
@A00155:342:HHGFNDSXY:1:1570:29017:30953 1:N:0:GAACCTAG+TCCGCATA  
ATTGAGGATACACCACCTTCCAATCCATCTGCAGCCACACGCATGCTTCCGCCGTTGATGGCACGAAC  
TGGTATGCCGCAAAACCTATGATGTACAGGGCTGCTGAAAACCTGGTCATAAAGCCGGTTTTGCCCTAC  
+  
FFFFFFFFFFFFFFFFFFFFFFFFFFFFFFFFFFFFFFFFFFFFFFFFFFFFFFFFFFFFFFFFFFFFFFFF  
FFFFFFFFFFFFFFFFFFFFFFFFFFFFFFFFFFFFFFFFFFFFFFFFFFFFFFFFFFFFFFFFFFFFFFFF,  
@A00155:342:HHGFNDSXY:1:2516:32868:28040 2:N:0:GAACCTAG+TCCGCATA  
TGAGGATACACCACCTTCCAATCCATCTGCAGCCACACGCATGCTTCCGCCGTTGATGGCACGAAC  
GTATGCCGCAAAACCTATGATGTACAGGGCTGCTGAAAACCTGGTCATAAAGCCGGTTTTG  
+  
:FFFF:FFFFFFFFFFFF,FFFFFFFFFFFF:FF::FFFFFFFFFFFFFFFFFFFFFFFF:F:FFFF:F,FFFFF  
F,FFFFFFFFFFFFFFFFFFFFFFFFFFFFFFFFFFFFFFFFFFFFFFFFFFFFFFFFFFFFFFFF:F:FFF  
@A00155:342:HHGFNDSXY:1:1552:17797:19820 2:N:0:GAACCTAG+TCCGCATA  
GGATACACCACCTTCCAATCCATCTGCAGCCACACGCATGCTTCCGCCGTTGATGGCACGAAC

TGCCGCAAAACCTATGATGTACAGGGCTGCTGAAAACCTGGTCATAAAGCCGGTTTTGCCCTACATATG  
+  
:F:FFF,F,:FF:FFFFFF:FFFFFFF:FFFFFFFFFFFFFFFFFFFFFFFFFFFFFFFFFFFFFFFFFFFFFFFF  
FFFFFFFFFFFFFFFFFFFFFFFFFFFFFFFFFFFFFFFFFFFFFFFFFFFFFFFFFFFFFFFFFFFFFFFFFFFFFFFF  
@A00155:342:HHGFNDSXY:1:2410:1479:23343 2:N:0:GAACCTAG+TCCGCATA  
GATACACCACCTTCCAATCCATCTGCAGCCACACGCATGCTTCCGCCGTTGATGGCACGAACCTGGTATG  
GCCGCAAAACCTATGATGTACAGGGCTGCTGAAAACCTGGTCATAAAGCCGGTTTTGCCCTACATATG  
+  
FFFFFFFFF:,FFF:FFFFFFFF:FFFFFFFFFFFFFFFFFFFFFFFFFFFFFFFFFFFFFFFFFFFFFFFF:FFFFFFFFF:FFFFFFF  
FFFFFFFFFFFFFFFFFFFFFFFFFFFFFFFFFFFFFFFFFFFFFFFFFFFFFFFFFFFFFFFFFFFFFFFFFFFFFFFF  
@A00155:342:HHGFNDSXY:1:1205:1651:34695 2:N:0:GAACCTAG+TCCGCATA  
CACCACCTTCCAATCCATCTGCAGCCACACGCATGCTTCCGCCGTTGATGGCACGAACCTGGTATGCCG  
CAAAACCTATGATGTACAGGGCTGCTGAAAACCTGGTCATAAAGCCGGTTTTGCCCTACATATGCCCTC  
+  
FF:FFFF:FFFFFFFF:FFFFFFFFFFFFFFFFFFFFFFFFFFFFFFFFFFFFFFFFFFFFFFFFFFFFFFFF:FFFF:FFFFF:FFFFF:FFFFF:FFFF  
FFFFFFFFFFFFFFFFFFFFFFFFFFFFFFFFFFFFFFFFFFFFFFFFFFFFFFFFFFFFFFFFFFFFFFFFFFFFFFFF:FFFFFFFFF:,FFFFF:FFFF:FFFFF,F  
@A00155:342:HHGFNDSXY:1:1141:22110:5368 2:N:0:GAACCTAG+TCCGCATA  
CACCACCTTCCAATCCATCTGCAGCCACACGCATGCTTCCGCCGTTGATGGCACGAACCTGGTATGCCG  
CAAAACCTATGATGTACAGGGCTGCTGAAAACCTGGTCATAAAGCCGGTTTTGCCCTACATATGCCCTC  
+  
FF:FFFFFFFFFFFF:F:FFF:FFFFFFFFFFFFFFFFFFFFFFFFFFFFFFFFFFFFFFFFFFFFFFFF:F:FFFFFFFFFFFFFFFFFFFFFFFFFFFFF  
FFFFF:FFFFFFFFFFFFFFFFFFFFFFFFFFFFFFFFFFFFFFFFFFFFFFFFFFFFFFFFFFFFFFFFFFFFFFFFFFFFF  
@A00155:342:HHGFNDSXY:1:2470:27190:5024 2:N:0:GAACCTAG+TCCGCATA  
CCACCTTCCAATCCATCTGCAGCCACACGCATGCTTCCGCCGTTGATGGCACGAACCTGGTATGCCGCA  
AAACCTATGATGTACAGGGCTGCTGAAAACCTGGTCATAAAGCCGGTTTTGCCCTACATATACCCTCAA  
+  
FFFFFFF,FF:FFFFFFFFFFFFFFFFFFFFFFFFFFFFFFFFFFFFFFFFFFFFFFFFFFFFFFFFFFFFFFFF,FFFFF,FFF  
FFFFFFFFFFFFFFFFFFFFFFFFFFFFFFFFFFFFFFFFFFFFFFFFFFFFFFFFFFFFFFFFFFFFFFFFFFFFFFFF:FF:FFFFFFFF:FFFFFFFFFFFFFFFFF  
@A00155:342:HHGFNDSXY:1:2351:6054:7498 2:N:0:GAACCTAG+TCCGCATA  
CACCTTCCAATCCATCTGCAGCCACACGCATGCTTCCGCCGTTGATGGCACGAACCTGGTATGCCGCAA  
AACCTATGATGTACAGGGCTGCTGAAAACCTGGTCATAAAGCCGGTTTTGCCCTACATATGCCCTCAA  
+  
FFFFFFFFFFFFFFFFFFFFFFFFFFFFFFFFFFFFFFFFFFFFFFFFFFFFFFFFFFFFFFFFFFFFFFFF,FFFFFFFFFFFFFFF,FFFFFFFFFFFFFFFFF  
FFFFFFFFFFFFFFFFFFFFFFFFFFFFFFFFFFFFFFFFFFFFFFFFFFFFFFFFFFFFFFFFFFFFFFFFFFFFFFFF:FFFF:FFFFF  
@A00155:342:HHGFNDSXY:1:1365:22173:22075 2:N:0:GAACCTAG+TCCGCATA  
ACCTTCCAATCCATCTGCAGCCACACGCATGCTTCCGCCGTTGATGGCACGAACCTGGTATGCCGCAAA  
ACCTATGATGTACAGGGCTGCTGAAAACCTGGTCATAAAGCCGGTTTTGCCCTACATATGCCCTCAACG  
+  
FFFFFFFFF,FFFFFFFFFFFFFFFFFFFFFFFFFFFFFFFFFFFFFFFFFFFFFFFFFFFFFFFFFFFFFFFF,FFFFFFFFFFFFFFFFFFFFFFFFFFFFF  
FFFFFFFFFFFFFFFFFFFFFFFFFFFFFFFFFFFFFFFFFFFFFFFFFFFFFFFFFFFFFFFFFFFFFFFFFFFFFFFF:FFFFFFFFF:FFFFFFFFFFFFF  
@A00155:342:HHGFNDSXY:1:2645:19388:1939 2:N:0:GAACCTAG+TCCGCATA  
CCTTCCAATCCATCTGCAGCCACACGCATGCTTCCGCCGTTGATGGCACGAACCTGGTATGCCGCAAAA  
CCTATGATGTACAGGGCTGCTGAAAACCTGGTCATAAAGCCGGTTTTGCCCTACATATGCCCTCAACGC  
+  
FFFFFFFFFFFFFFFFFFFFFFFFFFFFFFFFFFFFFFFFFFFFFFFFFFFFFFFFFFFFFFFFFFFFFFFF,FFFFFFFFFFFFFFF:FFFFFFFFF:FFFFFFFFF  
FFFFFFFFF:FFFFFFFFFFFFFFFFFFFFFFFFFFFFFFFFFFFFFFFFFFFFFFFFFFFFFFFFFFFFFFFFFFFFFFFF:FFFFFFFFF:FFFFFFFFF  
@A00155:342:HHGFNDSXY:1:1260:33003:32064 2:N:0:GAACCTAG+TCCGCATA  
CTTCCAATCCATCTGCAGCCACACGCATGCTTCCGCCGTTGATGGCACGAACCTGGTATGCCGCAAAAC  
CTATGATGTACAGGGCTGCTGAAAACCTGGTCATAAAGCCGGTTTTGCCCTACATATGCCCTC  
+  
F::FFF,:FFF,FFFFFFFFF::FF::FFF,FFFFFFFFF:FF:F:F,FFFFFF:FFF:FFFFFF:,FF  
F,FFFF:F:FFFFFFFF:FF:FF:FFF:FFFFFFFF:F:FFFFF,:FFFFFFFFF:,FFF:FF  
@A00155:342:HHGFNDSXY:1:1246:22064:22138 2:N:0:GAACCTAG+TCCGCATA  
CTTCCAATCCATCTGCAGCCACACGCATGCTTCCGCCGTTGATGGCACGAACCTGGTATGCCGCAAAAC

CTATGATGTACAGGGCTGCTGAAAACCTGGTCATAAAGCCGGTTTTGCCCTACATATGCCCTC  
+  
FFFFFFFFFFFFFFFFFFFFFFFF,FFFFFFFF,FFFFFFFFFFFFFFFFFFFFFFFF,FFFF:FFFFFFFFFFFF  
FFFFFFFFFFFFFFFFFFFFFFFFFFFFFFFFFFFFFFFF:FFF:FFFFFF:F:FFFFFF:FFFFFFFFFFFF  
@A00155:342:HHGFNDSXY:1:1263:19388:34256 2:N:0:GAACCTAG+TCCGCATA  
CTTCCAATCCATCTGCAGCCACACGCATGCTTCCGCCGTTGATGGCACGAACCTGGTATGCCGCAAAAC  
CTATGATGTACAGGGCTGCTGAAAACCTGGTCATAAAGCCGGTTTTGCCCTACATATGCCCTCA  
+  
FF,FFF:FFFFFFFFFFFFFFFFFFFFFFFF,FFFFFFFFFFFFFFFFFFFFFFFF,FFFFFFFFFFFFFFFFFFFF  
FFFFFFFFFFFF,FFFFFFFFFFFFFFFFFFFFFFFFFFFFFFFFFFFFFFFF,FFFFFFFFFFFFFFFFFFFF  
@A00155:342:HHGFNDSXY:1:2228:26142:5494 2:N:0:GAACCTAG+TCCGCATA  
TTCCAATCCATCTGCAGCCACACGCATGCTTCCGCCGTTGATGGCACGAACCTGGTATGCCGCAAAACC  
TATGATGTACAGGGCTGCTGAAAACCTGGTCATAAAGCCGGTTTTGCCCTACATATGCCCT  
+  
FFFFFFFFFFFFFFFFFFFFFFFFFFFFFFFF:FFFFFFFFFFFFFFFFFFFFFFFFFFFFFFFFFFFFFFFFFFFF  
FFFFF:FFFFFFFFFFFFFFFFFFFFFFFF:FFFFFFFFFFFFFFFFFFFF:FFFFFFFFFFFFFFFFFFFF  
@A00155:342:HHGFNDSXY:1:2228:25798:5588 2:N:0:GAACCTAG+TCCGCATA  
TTCCAATCCATCTGCAGCCACACGCATGCTTCCGCCGTTGATGGCACGAACCTGGTATGCCGCAAAACC  
TATGATGTACAGGGCTGCTGAAAACCTGGTCATAAAGCCGGTTTTGCCCTACATATGCCCT  
+  
FFFFFFFFFFFFFFFFFFFFFFFFFFFFFFFFFFFFFFFFFFFFFFFFFFFFFFFFFFFFFFFFFFFFFFFFFFFF  
FF:FFFFFFFFFFFFFFFFFFFFFFFFFFFFFFFFFFFFFFFFFFFFFFFFFFFFFFFFFFFFFFFF:FFFFF  
@A00155:342:HHGFNDSXY:1:2105:6415:5087 2:N:0:GAACCTAG+TCCGCATA  
CAATCCATCTGCAGCCACACGCATGCTTCCGCCGTTGATGGCACGAACCTGGTATGCCGCAAAACCTAT  
GATGTACAGGGCTGCTGAAAACCTGGTCATAAAGCCGGTTTTGCCCTACATATGCCCTCAACGCAGACC  
+  
:FFFFFFFF,FFFFFFFF,FF:FFFF,FFFFFFFFFFFFFFFFFFFFFFFFFFFFFFFFFFFFFFFFFFFFFFFF  
FFFFFFFFFFFFFFFFFFFFFFFF,FFFFFFFF:FFFFFFFFFFFFFFFFFFFFFFFFFFFFFFFFFFFFFFFFFFFF  
@A00155:342:HHGFNDSXY:1:2229:20410:32299 2:N:0:GAACCTAG+TCCGCATA  
CCATCTGCAGCCACACGCATGCTTCCGCCGTTGATGGCACGAACCTGGTATGCCGCAAAACCTATGATG  
TACAGGGCTGCTGAAAACCTGGTCATAAAGCCGGTTTTGCCCTACATATGCCCTCAACGCAGACCATAT  
+  
FF:FFFFFFFFF:FFFFFFFFF,FFFFFFFFFFFFFFFFFFFFFFFFFFFFFFFFFFFFFFFFFFFFFFFFFFFF,FFFF  
FFFFFFFFFFFFFFFFFFFFFFFF:FFFFFFFFF,FFFFFFFFF,FFFFFFFFFFFFFFFFFFFFFFFFFFFFFFFF  
@A00155:342:HHGFNDSXY:1:1206:31403:18803 2:N:0:GAACCTAG+TCCGCATA  
CCATCTGCAGCCACACGCATGCTTCCGCCGTTGATGGCACGAACCTGGTATGCCGCAAAACCTATGATG  
TACAGGGCTGCTGAAAACCTGGTCATAAAGCCGGTTTTGCCCTACATATGCCCTCAACGCAGACCATAT  
+  
FFFFFFFFFFFFFFFFFFFFFFFFFFFF:FFFFFFFFFFFFFFFFFFFFFFFFFFFFFFFFFFFFFFFFFFFFFFFF  
FFFFFFFFFFFFFFFFFFFFFFFFFFFFFFFFFFFFFFFFFFFF:FFFFFFFFFFFFFFFFFFFFFFFFFFFFFFFFF:  
@A00155:342:HHGFNDSXY:1:2172:12418:24815 2:N:0:GAACCTAG+TCCGCATA  
CCATCTGCAGCCACACGCATGCTTCCGCCGTTGATGGCACGAACCTGGTATGCCGCAAAACCTATGATG  
TACAGGGCTGCTGAAAACCTGGTCATAAAGCCGGTTTTGCCCTACATATGCCCTCAACGCAGACCATAT  
+  
FFFFFFFFFFFFFFFFFFFF:FFFFFFFFFFFFFFFFFFFF:FFFFFFFFFFFFFFFFFFFFFFFFFFFFFFFFFFFF  
FFFFFFFFFFFFFFFFFFFFFFFFFFFFFFFFFFFFFFFFFFFFFFFFFFFFFFFFFFFFFFFFFFFFFFFFFFFF  
@A00155:342:HHGFNDSXY:1:2314:23873:23766 2:N:0:GAACCTAG+TCCGCATA  
CCATCTGCAGCCACACGCATGCTTCCGCCGTTGATGGCACGAACCTGGTATGCCGCAAAACCTATGATG  
TACAGGGCTGCTGAAAACCTGGTCATAAAGCCGGTTTTGCCCTACATATGCCCTCAACGCAGACCATAT  
+  
FFFFFFFFFFFFFFFFFFFF,FFFFF:F,FFFFFFFFFFFFFFFFFFFFFFFFFFFFFFFFFFFFFFFFFFFF:FFFFF  
FFFFFFFFFFFFFFFFFFFFFFFFFFFFFFFFFFFFFFFFFFFFFFFFFFFFFFFFFFFFFFFFFFFFFFFFFFFF  
@A00155:342:HHGFNDSXY:1:2312:28763:16642 2:N:0:GAACCTAG+TCCGCATA  
CATCTGCAGGCACACGCATGCTTCCGCCGTTGATGGCACGAACCTGGTATGCCGCAAAACCTATGATGT

ACAGGGCTGCTGAAAACCTGGTCATAAAGCCGGTTTTGCCCTACATATGCCCTCAACGCAGACCATATC  
+  
F,FFF:FFFFFFFFFFFFFFFFFFFFFFFFFFFFFFFFFFFFFFFFFFFFFFFFFFFFFFFFFFFFFFFF:FFFF::FFFF  
FFFFFFFFFFFFFFFFFFFFFFFFFFFFFFFFFFFFFFFFFFFFFFFFFFFFFFFFFFFFFFFFFFFFFFFF:FF  
@A00155:342:HHGFNDSXY:1:2269:2998:30044 2:N:0:GAACCTAG+TCCGCATA  
ATCTGCAGCCACACGCATGCTTCCGCCGTTGATGGCACGAACCTGGTATGCCGCAAAACCTATGATGTA  
CAGGGCTGCTGAAAACCTGGTCATAAAGCCGGTTTTGCCCTACATATGCCCTCAACGCAGACCATATCT  
+  
FFFFFFFFFFFFFFFF:FFFFFFFFFFFFFFFFFFFFFFFFFFFFFFFFFFFFFFFFFFFFFFFFFFFFFFFF  
FFFFFFFFFFFFFFFFFFFFFFFFFFFFFFFFFFFFFFFFFFFFFFFFFFFFFFFFFFFFFFFFFFFFFFFF  
@A00155:342:HHGFNDSXY:1:1112:12500:1344 1:N:0:GAACCTAG+TCCGCATA  
ATCTGCAGCCACACGCATGCTTCCGCCGTTGTTGGCACGAACCTGGTATGCCGCAAAACCTATGATGTA  
CAGGGCTGCTGAAAACCTGGTCATAAAGCCGGTTTTGCCCTACATATGCCCTCAACGCAGACCATATCT  
+  
FFFFFFFFFFFFFFFFFFFFFFFFFFFFFFFFFFFFFFFFFFFFFFFFFFFFFFFFFFFFFFFFFFFFFFFF  
FFFFFFFFFFFFFFFFFFFFFFFFFFFFFFFFFFFFFFFFFFFFFFFFFFFFFFFFFFFFFFFFFFFFFFFF  
@A00155:342:HHGFNDSXY:1:2215:3197:7874 1:N:0:GAACCTAG+TCCGCATA  
TCTGCAGCCACACGCATGCTTCCGCCGTTGATGGCACGAACCTGGTATGCCGCAAAACCTATGATGTAC  
AGGGCTGCTGAAAACCTGGTCATAAAGCCGGTTTTGCCCTACATATGCCCTCAACGCAGACAATATCT  
+  
F:FFFFFFFFFFFFFFFFFFFFFFFFFFFFFFFFFFFFFFFFFFFFFFFFFFFFFFFFFFFFFFFFFFFFFFFF  
FFFFFFFFFFFFFFFFFFFFFFFFFFFFFFFFFFFFFFFFFFFFFFFFFFFFFFFFFFFFFFFFFFFFFFFF:F:FFF,FFFFFFFFFFFFFFFF,FF:FF  
@A00155:342:HHGFNDSXY:1:2140:14534:18521 1:N:0:GAACCTAG+TCCGCATA  
TCTGCAGCCACACGCATGCTTCCGCCGTTGATGGCACGAACCTGGTATGCCGCAAAACCTATGATGTAC  
AGGGCTGCTGAAAACCTGGTCATAAAGCCGGTTTTGCCCTACATATGCCCTCAACGCAGACCATATCTG  
+  
FFFFFFFFFFFFFFFFFFFFFFFFFFFFFFFFFFFFFFFFFFFFFFFFFFFFFFFFFFFFFFFFFFFFFFFF  
FFFFFFFFFFFFFFFFFFFFFFFFFFFFFFFFFFFFFFFFFFFFFFFFFFFFFFFFFFFFFFFFFFFFFFFF:FFFFFFFFFFFFFFFFFFFFFFFF  
@A00155:342:HHGFNDSXY:1:2451:24325:6198 1:N:0:GAACCTAG+TCCGCATA  
TCTGCAGCCACACGCATGCTTCCGCCGTTGATGGCACGAACCTGGTATGCCGCAAAACCTATGATGTAC  
AGGGCTGCTGAAAACCTGGTCATAAAGCCGGTTTTGCCCTACATATGCCCTCAACGCAGACCATATCTG  
+  
FFFFFFFFFFFFFFFFFFFFFFFFFFFFFFFFFFFFFFFFFFFFFFFFFFFFFFFFFFFFFFFFFFFFFFFF  
FFFFFFFFFFFFFFFFFFFFFFFFFFFFFFFFFFFFFFFFFFFFFFFFFFFFFFFFFFFFFFFFFFFFFFFF,FFFFFFFFFFFFFFFF:FFFFF  
@A00155:342:HHGFNDSXY:1:1274:30861:31641 1:N:0:GAACCTAG+TCCGCATA  
CTGCAGCCACACGCATGCTTCCGCCGTTGATGGCACGAACCTGGTATGCCGCAAAACCTAAGATGTACA  
GGGCTGCTGAAAACCTGGTCATAAAGCCGGTTTTGCCCTACATATGCCCTCAACGCAGACCATATCTGT  
+  
FFFFFFFFFFFFFFFFFFFFFFFFFFFFFFFFFFFFFFFFFFFFFFFFFFFFFFFFFFFFFFFFFFFFFFFF,F:FFF:FFFF  
FFFFFFFFFFFFFFFFFFFFFFFFFFFFFFFFFFFFFFFFFFFFFFFFFFFFFFFFFFFFFFFFFFFFFFFF:F,FF::FFFFFFFFFFFFFFFF:FFFFFFFFFFFFFFFF  
@A00155:342:HHGFNDSXY:1:1324:22833:31892 1:N:0:GAACCTAG+TCCGCATA  
CTGCAGCCACACGCATGCTTCCGCCGTTGATGGCACGAACCTGGTATGCCGCAAAACCTATGATGTACA  
GGGCTGCTGAAAACCTGGTCATAAAGCCGGTTTTGCCCTACATATGCCCTCAACGCAGACCATATCTGT  
+  
FFFFFFFFFFFFFFFFFFFFFFFFFFFFFFFFFFFFFFFFFFFFFFFFFFFFFFFFFFFFFFFFFFFFFFFF  
FFFFFFFFFFFFFFFFFFFFFFFFFFFFFFFFFFFFFFFFFFFFFFFFFFFFFFFFFFFFFFFFFFFFFFFF,FFFFFFFFFFFFFFFF:FFFF  
@A00155:342:HHGFNDSXY:1:2113:26467:4773 1:N:0:GAACCTAG+TCCGCATA  
CTGCAGCCACACGCATGCTTCCGCCGTTGATGGCACGAACCTGGTATGCCGCAAAACCTATGATGTACA  
GGGCTGCTGAAAACCTGGTCATAAAGCCGGTTTTGCCCTACATATGCCCTCAACGCAGACCATATCTGT  
+  
FFFFFFFFFFFFFFFFFFFFFFFFFFFFFFFFFFFFFFFFFFFFFFFFFFFFFFFFFFFFFFFFFFFFFFFF  
FFFFFFFFFFFFFFFFFFFFFFFFFFFFFFFFFFFFFFFFFFFFFFFFFFFFFFFFFFFFFFFFFFFFFFFF  
@A00155:342:HHGFNDSXY:1:2677:1154:34460 1:N:0:GAACCTAG+TCCGCATA  
CTGCAGCCACACGCATGCTTCCGCCGTTGATGGCACGAACCTGGTATGCCGCAAAACCTATGATGTACA

GGGCTGCTGAAAACTGGTCATAAAGCCGGTTTTGCCCTACATATGCCCTCAACGCAGACCATATCTGT  
+  
FFFFFFFFFFFF:FFFFFFFFFFFFFFFFFFFFFFFFFFFFFFFFFFFFFFFFFFFFFFFFFFFFFFFFFFFFFFFF  
FFFFFFFFFFFFFFFFFFFFFFFFFFFFFFFFFFFFFFFFFFFFFFFFFFFFFFFFFFFFFFFFFFFFFFFFFFFFFFFF  
FFFFFFFFFFFFFFFFFFFFFFFFFFFFFFFFFFFFFFFFFFFFFFFFFFFFFFFFFFFFFFFFFFFFFFFFFFFFFFFF  
@A00155:342:HHGFNDSXY:1:1365:22173:22075 1:N:0:GAACCTAG+TCCGCATA  
TGCAGCCACACGCATGCTTCCGCCGTTGATGGCACGAAGTGGTATGCCGCAAAACCTATGATGTACAG  
GGCTGCGGAAAACTGGTCATAAAGCCGGTTTTGCCCTACATATGCCCTCAACGCAGACCATATCTGTG  
+  
FFFFFFFFFFFFFFFFFFFFFFFFFFFFFFFFFFFFFFFFFFFFFFFFFFFFFFFFFFFFFFFFFFFFFFFFFFFFFFFF  
FFFFFFF,FFFFFFFFFFFFFFFFFFFFFFFFFFFFFFFFFFFFFFFFFFFFFFFFFFFFFFFFFFFFFFFFFFFFFFF  
@A00155:342:HHGFNDSXY:1:1516:5168:26913 1:N:0:GAACCTAG+TCCGCATA  
TGCAGCCACACGCATGCTTCCGCCGTTGATGGCACGAAGTGGTATGCCGCAAAACCTATGATGTACAG  
GGCTGCTGAAAACTGGTCATAAAGCCGGTTTTGCCCTACATATGCCCTCAACGCAGACCATATCTGTG  
+  
FFFFFFFFFFFFFFFFFFFFFFFFFFFFFFFFFFFFFFFFFFFFFFFFFFFFFFFFFFFFFFFFFFFFFFFFFFFFFFFF  
FFFFFFFFFFFFFFFFFFFFFFFFFFFFFFFFFFFFFFFFFFFFFFFFFFFFFFFFFFFFFFFFFFFFFFFFFFFFFFFF  
@A00155:342:HHGFNDSXY:1:2338:13892:3599 1:N:0:GAACCTAG+TCCGCATA  
TGCAGCCACACGCATGCTTCCGCCGTTGATGGCACGAAGTGGTATGCCGCAAAACCTATGATGTACAG  
GGCTGCTGAAAACTGGTCATAAAGCCGGTTTTGCCCTACATATGCCCTCAACGCAGACCATATCTGTG  
+  
FFFFFFFFFFFFFFFFFFFFFFFFFFFFFFFFFFFFFFFFFFFFFFFFFFFFFFFFFFFFFFFFFFFFFFFFFFFFFFFF  
FFFFFFFFFFFFFFFFFFFFFFFFFFFFFFFFFFFFFFFFFFFFFFFFFFFFFFFFFFFFFFFFFFFFFFFFFFFFFFFF  
@A00155:342:HHGFNDSXY:1:1128:6307:26725 1:N:0:GAACCTAG+TCCGCATA  
TGCAGCCACACGCATGCTTCCGCCGTTGATGGCACGAAGTGGTATGCCGCAAAACCTATGATGTACAG  
GGCTGCTGAAAACTGGTCATAAAGCCGGTTTTGCCCTACATATGCCCTCAACGCAGACCATATCTGTG  
+  
FFFFFFFFFFFFFFFFFFFFFFFFFFFFFFFFFFFFFFFFFFFFFFFFFFFFFFFFFFFFFFFFFFFFFFFFFFFFFFFF  
FFFFFFFFFFFFFFFFFFFFFFFFFFFFFFFFFFFFFFFFFFFFFFFFFFFFFFFFFFFFFFFFFFFFFFFFFFFFFFFF  
@A00155:342:HHGFNDSXY:1:1128:5728:26819 1:N:0:GAACCTAG+TCCGCATA  
TGCAGCCACACGCATGCTTCCGCCGTTGATGGCACGAAGTGGTATGCCGCAAAACCTATGATGTACAG  
GGCTGCTGAAAACTGGTCATAAAGCCGGTTTTGCCCTACATATGCCCTCAACGCAGACCATATCTGTG  
+  
FFFFFFFFFFFFFFFFFFFFFFFFFFFFFFFFFFFFFFFFFFFFFFFFFFFFFFFFFFFFFFFFFFFFFFFFFFFFFFFF  
FFFFFFFFFFFFFFFFFFFFFFFFFFFFFFFFFFFFFFFFFFFFFFFFFFFFFFFFFFFFFFFFFFFFFFFFFFFFFFFF  
@A00155:342:HHGFNDSXY:1:1510:23249:2362 1:N:0:GAACCTAG+TCCGCATA  
AGCCACACGCATGCTTCCGCCGTTGATGGCACGAAGTGGTATGCCGCAAAACCTATGATGTACAGGGC  
TGCTGAAAACTGGTCATAAAGCCGGTTTTGCCCTACATATGCCCTCAACGCAGACCATATCTGTGCCG  
+  
FFFFFFFFFFFFFFFFFFFFFFFFFFFFFFFFFFFFFFFFFFFFFFFFFFFFFFFFFFFFFFFFFFFFFFFFFFFFFFFF  
FF:FFFFFFFFFFFFFFFFFFFFFFFFFFFFFFFFFFFFFFFFFFFFFFFFFFFFFFFFFFFFFFFFFFFFFFFFFFFF  
@A00155:342:HHGFNDSXY:1:1263:20473:2628 1:N:0:GAACCTAG+TCCGCATA  
AGCCACACGCATGCTTCCGCCGTTGATGGCACGAAGTGGTATGCCGCAAAACCTATGATGTACAGGGC  
TGCTGAAAACTGGTCATAAAGCCGGTTTTGCCCTACATATGCCCTCAACGCAGACCATATCTGTGCCG  
+  
FFFFFFFFFFFFFFFFFFFFFFFFFFFFFFFFFFFFFFFFFFFFFFFFFFFFFFFFFFFFFFFFFFFFFFFFFFFFFFFF  
FFFFFFFFFFFFFFFFFFFFFFFFFFFFFFFFFFFFFFFFFFFFFFFFFFFFFFFFFFFFFFFFFFFFFFFFFFFFFFFF  
@A00155:342:HHGFNDSXY:1:2646:28393:24017 2:N:0:GAACCTAG+TCCGCATA  
GCCACACGCATGCTTCCGCCGTTGATGGCACGAAGTGGTATGCCGCAAAACCTATGATGTACAGGGCT  
GCTGAAAACTGGTCATAAAGCCGGTTTTGCCCTACATATGCCCTCAACGCAGACCATATCTGTGCCG  
+  
FFFFFFFFFFFFFFFFFFFFFFFFFFFFFFFFFFFFFFFFFFFFFFFFFFFFFFFFFFFFFFFFFFFFFFFFFFFFFFFF  
FFFFFFFFFFFFFFFFFFFFFFFFFFFFFFFFFFFFFFFFFFFFFFFFFFFFFFFFFFFFFFFFFFFFFFFFFFFFFFFF  
@A00155:342:HHGFNDSXY:1:1634:23149:24674 1:N:0:GAACCTAG+TCCGCATA  
CCACACGCATGCTTCCGCCGTTGATGGCACGAAGTGGTATGCCGCAAAACCTATGATGTACAGGGCTG

+  
 FFFFFFFFFFFFFFFFFFFFFFFFFFFFFFFFFFFFFFFFFFFFFFFFFFFFFFFFFFFFFFFFFFFFFFFFFFFFFFFFFFFFFFFFFFFFFFFFFFFFFFFFF  
 FFFFFFFFFFFFFFFFFFFFFFFFFFFFFFFFFFFFFFFFFFFFFFFFFFFFFFFFFFFFFFFFFFFFFFFFFFFFFFFFFFFFFFFFFFFFFFFFFFFFFFFFF  
 @A00155:342:HHGFNDSXY:1:1507:32072:31641 1:N:0:GAACCTAG+TCCGCATA  
 CACGCATGCTTCCGCCGTTGATGGCACGAAC TGGTATGCCGCAAAACCTATGATGTACAGGGCTGCTG  
 AAAACTGGTCATAAAGCCGGTTTTGCCCTACATATGCCCTCAACGCAGACCATATCTGTGCCGAGTTG  
 +  
 FFFFFFFFFFFFFFFFFFFFFFFFFFFFFFFFFFFFFFFFFFFFFFFFFFFFFFFFFFFFFFFFFFFFFFFFFFFFFFFFFFFFFFFFFFFFFFFFFFFFFFFFF  
 FFFFFFFFFFFFFFFFFFFFFFFFFFFFFFFFFFFFFFFFFFFFFFFFFFFFFFFFFFFFFFFFFFFFFFFFFFFFFFFFFFFFFFFFFFFFFFFFFFFFFFFFF  
 @A00155:342:HHGFNDSXY:1:1607:1389:31673 1:N:0:GAACCTAG+TCCGCATA  
 CACGCATGCTTCCGCCGTTGATGGCACGAAC TGGTATGCCGCAAAACCTATGATGTACAGGGCTGCTG  
 AAAACTGGTCATAAAGCCGGTTTTGCCCTACATATGCCCTCAACGCAGACCATATCTGTGCCGAGTTG  
 +  
 FFFFFFFFFFFFFFFFFFFFFFFFFFFFFFFFFFFFFFFFFFFFFFFFFFFFFFFFFFFFFFFFFFFFFFFFFFFFFFFFFFFFFFFFFFFFFFFFFFFFFFFFF  
 FF,,FFFFFFFFF,:F,FFFFFFFF:FF:FF,:F,:F,FF:FFFF:FFF,,FFFFFF:FFFFFFFFF  
 @A00155:342:HHGFNDSXY:1:1139:5584:11193 1:N:0:GAACCTAG+TCCGCATA  
 CGCATGCTTCCGCCGTTGATGGCACGAAC TGGTATGCCGCAAAACCTATGATGTACAGGGCTGCTGAA  
 AACTGGTCATAAAGCCGGTTTTGCCCTACATATGCCCTCAACGCAGACCATATCTGTGCCGAGTTGGG  
 +  
 FFFFFFFFFFFFFFFFFFFFFFFFFFFFFFFFFFFFFFFFFFFFFFFFFFFFFFFFFFFFFFFFFFFFFFFFFFFFFFFFFFFFFFFFFFFFFFFFFFFFFFFFF  
 F:FFFFFFFFFFFFFFFFFFFFFFFFFFFFFFFFFFFFFFFFFFFFFFFFFFFFFFFFFFFFFFFFFFFFFFFFFFFFFFFFFFFFFFFFFFFFFFFF:F:  
 @A00155:342:HHGFNDSXY:1:1246:22064:22138 1:N:0:GAACCTAG+TCCGCATA  
 CATGCTTCCGCCGTTGATGGCACGAAC TGGTATGCCGCAAAACCTATGATGTACAGGGCTGCTGAAAA  
 CTGGTCATAAAGCCGGTTTTGCCCTACATATGCCCTCAACGCAGACCATATC  
 +  
 FFFFFFFFFFFFFFFFFFFFFFFFFFFFFFFFFFFFFFFFFFFFFFFFFFFFFFFFFFFFFFFFFFFFFFFFFFFFFFFFFFFFFFFFFFFFFFFFFFFFFFFFF  
 FFFFFFFFFFFFFFFFFFFFFFFFFFFFFFFFFFFFFFFFFFFFFFFFFFFFFFFFFFFFFFFFFFFFFFFFFFFFFFFFFFFFFFFFFFFFFFFFFFFFFFFFF  
 @A00155:342:HHGFNDSXY:1:1260:33003:32064 1:N:0:GAACCTAG+TCCGCATA  
 CATGCTTCCGCCGTTGATGGCACGAAC TGGTATGCCGCAAAACCTATGATGTACAGGGCTGCTGAAAA  
 CTGGTCATAAAGCCGGTTTTGCCCTACATATGCCCTCAACGCAGACCATATC  
 +  
 FFFFF,FFFFFFFF:FFF:FFFFFFFF:FFF,FFFF:F:FFFFFF,FFFF:FFFFFFFFFFFFFFFF:F:  
 FFFFFFF:FFFFFFFF:,FFFFFFFF,F,F:FFFFFFFF:FFFF,F:FF  
 @A00155:342:HHGFNDSXY:1:1263:19388:34256 1:N:0:GAACCTAG+TCCGCATA  
 CATGCTTCCGCCGTTGATGGCACGAAC TGGTATGCCGCAAAACCTATGATGTACAGGGCTGCTGAAAA  
 CTGGTCATAAAGCCGGTTTTGCCCTACATATGCCCTCAACGCAGACCATATCT  
 +  
 FFFFFFFFFFFFFFFFFFFFFFFFFFFFFFFFFFFFFFFFFFFFFFFFFFFFFFFFFFFFFFFFFFFFFFFFFFFFFFFFFFFFFFFFFFFFFFFFFFFFFFFFF  
 FFFFFFFFFFFFFFFFFFFFFFFFFFFFFFFFFFFFFFFFFFFFFFFFFFFFFFFFFFFFFFFFFFFFFFFFFFFFFFFFFFFFFFFFFFFFFFFFFFFFFFFFF  
 @A00155:342:HHGFNDSXY:1:1363:20518:32988 1:N:0:GAACCTAG+TCCGCATA  
 TGCTTCCGCCGTTGATGGCACGAAC TGGTATGCCGCAAAACCTATGATGTACAGGGCTGCTGAAAAC  
 GTGCATAAAGCCGGTTTTGCCCTACATATGCCCTCAACGCAGACCATATCTGTGCCGAGTTGGGTAGG  
 +  
 FFFFFFFFFFFFF,FF,FFFFFFFFFFFFFFFFFFFFFFFFFFFFFFFFFFFFFFFFFFFFFFFFFFFFFFFFFFFFFFFFFFFFFFFF,FFFFFFFFFFFF  
 FFFFFFFFFFFFF,FFFF,FFFFFFFFFFFFFFFFFFFFFFFFFFFFFFFFFFFFFFFFFFFFFFFFFFFFFFFFFFFFFFFFFFFFFFFF:FFFFFFFFFFFF  
 @A00155:342:HHGFNDSXY:1:2274:23963:16595 2:N:0:GAACCTAG+TCCGCATA  
 TGCTTCCGCCGTTGATGGCACGAAC TGGTATGCCGCAAAACCTATGATGTACAGGGCTGCTGAAAAC  
 GTGCATAAAGCCGGTTTTGCCCTACATATGCCCTCAACGCAGACCATATCTGTGCCGAGTTGGGTAGG  
 +  
 FFFFFFFFF:F:FFFFFFFFFFFFFFFFFFFFFFFFFFFFFFFFFFFFFFFFFFFFFFFFFFFFFFFFFFFFFFFFFFFFFFFFFFFFFFFFFFFFFFFF  
 FFFFFFF,:FFFF:FFFFFFFF:FF:FFFF:FFFFFFFF,FFFF:FFFFFFFFFFFFFFFFFFFFFFFF  
 @A00155:342:HHGFNDSXY:1:2236:27724:19006 1:N:0:GAACCTAG+TCCGCATA  
 CTTCCGCCGTTGATGGCACGAAC TGGTATGCCGCAAAACCTATGATGTACAGGGCTGCTGAAAAC

TCATAAAGCCGGTTTTGCCCTACATATGCCCTCAACGCAGACCATATCTGTGCCGAGTTGGGTA  
+  
FFFFFFFFFFFFFFFFFFFFFFFFFFFFFFFFFFFFFFFFFFFFFFFFFFFFFFFFFFFFFFFFFFFFFFFF  
FFFFFFFFFFFFFFFFFFFFFFFFFFFFFFFFFFFFFFFFFFFFFFFFFFFFFFFFFFFFFFFFFFFFFFFF  
@A00155:342:HHGFNDSXY:1:2573:7283:18333 1:N:0:GAACCTAG+TCCGCATA  
CTTCCGCCGTTGATGGCACGAACTGGTATGCCGCAAAACCTATGATGTACAGGGCTGCTGAAAACCTGG  
TCATAAAGCCGGTTTTGCCCTACATATGCCCTCAACGCAGACCATATCTGTGCCGAGTTGGGTA  
+  
FFFFFFFFFFFFFFFFFFFFFFFFFFFFFFFFFFFFFFFFFFFFFFFFFFFFFFFFFFFFFFFFFFFFFFFF  
FFFFFFFFFFFFFFFFFFFFFFFFFFFFFFFFFFFFFFFFFFFFFFFFFFFFFFFFFFFFFFFFFFFFFFFF  
@A00155:342:HHGFNDSXY:1:2431:25256:14231 1:N:0:GAACCTAG+TCCGCATA  
CTTCCGCCGTTGATGGCACGAACTGGTATGCCGCAAAACCTATGATGTACAGGGCTGCTGAAAACCTGG  
TCATAAAGCCGGTTTTGCCCTACATATGCCCTCAACGCAGACCATATCTGTGCCGAGTTGGGTA  
+  
FFFFFFFFFFFFFFFFFFFFFFFFFFFFFFFFFFFFFFFFFFFFFFFFFFFFFFFFFFFFFFFFFFFFFFFF  
FFFFFFFFFFFFFFFFFFFFFFFFFFFFFFFFFFFFFFFFFFFFFFFFFFFFFFFFFFFFFFFFFFFFFFFF  
@A00155:342:HHGFNDSXY:1:2236:27932:19272 1:N:0:GAACCTAG+TCCGCATA  
CTTCCGCCGTTGATGGCACGAACTGGTATGCCGCAAAACCTATGATGTACAGGGCTGCTGAAAACCTGG  
TCATAAAGCCGGTTTTGCCCTACATATGCCCTCAACGCAGACCATATCTGTGCCGAGTTGGGTA  
+  
FFFFFFFFFFFFFFFFFFFFFFFFFFFFFFFFFFFFFFFFFFFFFFFFFFFFFFFFFFFFFFFFFFFFFFFF  
FFFFFFFFFFFFFFFFFFFFFFFFFFFFFFFFFFFFFFFFFFFFFFFFFFFFFFFFFFFFFFFFFFFFFFFF  
@A00155:342:HHGFNDSXY:1:1324:22833:31892 2:N:0:GAACCTAG+TCCGCATA  
CTTCCGCCGTTGATGGCACGAACTGGTATGCCGCAAAACCTATGATGTACAGGGCTGCTGAAAACCTGG  
TCATAAAGCCGGTTTTGCCCTACATATGCCCTCAACGCAGACCATATCTGTGCCGAGTTGGGTAGGTC  
+  
F,FFFFFFFFFFFFFFFFFFFFFFFFFFFFFFFFFFFFFFFFFFFFFFFFFFFFFFFFFFFFFFFFFFFFFFFF  
FFFFFFFFFFFFFFFFFFFFFFFFFFFFFFFFFFFFFFFFFFFFFFFFFFFFFFFFFFFFFFFFFFFFFFFF  
@A00155:342:HHGFNDSXY:1:2131:3803:2503 1:N:0:GAACCTAG+TCCGCATA  
CTTCCGCCGTTGATGGCACGAACTGGTATGCCGCAAAACCTATGATGTACAGGGCTGCTGAAAACCTGG  
TCATAAAGCCGGTTTTGCCCTACATATGCCCTCAACGCAGACCATATCTGTGCCGAGTTGGGTAGGTC  
+  
F:FFFFFFFFFFFFFFFFFFFFFFFFFFFFFFFFFFFFFFFFFFFFFFFFFFFFFFFFFFFFFFFFFFFFFFFF  
FFFFFFFFFFFFFFFFFFFFFFFFFFFFFFFFFFFFFFFFFFFFFFFFFFFFFFFFFFFFFFFFFFFFFFFF  
@A00155:342:HHGFNDSXY:1:2131:4643:2832 1:N:0:GAACCTAG+TCCGCATA  
CTTCCGCCGTTGATGGCACGAACTGGTATGCCGCAAAACCTAGGATGTACAGGGCTGCTGAAAACCTGG  
TCATAAAGCCGGTTTTGCCCTACATATGCCCTCAACGCAGACCATATCTGTGCCGAGTTGGGTAGGTC  
+  
FFFFFFFFFFFFFFFFFFFFFFFFFFFFFFFFFFFFFFFFFFFFFFFFFFFFFFFFFFFFFFFFFFFFFFFF  
FFFFFFFFFFFFFFFFFFFFFFFFFFFFFFFFFFFFFFFFFFFFFFFFFFFFFFFFFFFFFFFFFFFFFFFF  
@A00155:342:HHGFNDSXY:1:1325:30391:30953 1:N:0:GAACCTAG+TCCGCATA  
CTTCCGCCGTTGATGGCACGAACTGGTATGCCGCAAAACCTATGATGTACAGGGCTGCTGAAAACCTGG  
TCATAAAGCCGGTTTTGCCCTACATATGCCCTCAACGCAGACCATATCTGTGCCGAGTTGGGTAGGTC  
+  
F:FFFFFFFFFFFFFFFFFFFFFFFFFFFFFFFFFFFFFFFFFFFFFFFFFFFFFFFFFFFFFFFFFFFFFFFF  
FFFFFFFFFFFFFFFFFFFFFFFFFFFFFFFFFFFFFFFFFFFFFFFFFFFFFFFFFFFFFFFFFFFFFFFF  
@A00155:342:HHGFNDSXY:1:2541:2700:17253 2:N:0:GAACCTAG+TCCGCATA  
TCCGCCGTTGATGGCACGAACTGGTATGCCGCAAAACCTATGATGTACAGGGCTGCTGAAAACCTGGTC  
ATAAAGCCGGTTTTGCCCTACATATGCCCTCAACGCAGACCATATCTGTGCCGAGTTGGGTAGGTC  
+  
FFFFF:FFFFFFFFFFFFFFFFFFFFFFFFFFFFFFFFFFFFFFFFFFFFFFFFFFFFFFFFFFFFFFFF  
FF:F:FFFFFFFFFFFFFFFFFFFFFFFFFFFFFFFFFFFFFFFFFFFFFFFFFFFFFFFFFFFFFFFF  
@A00155:342:HHGFNDSXY:1:2541:2736:17190 2:N:0:GAACCTAG+TCCGCATA  
TCCGCCGTTGATGGCACGAACTGGTATGCCGCAAAACCTATGATGTACAGGGCTGCTGAAAACCTGGTC



ATAAAGCCGGTTTTGCCCTACATATGCCCTCAACGCAGACCATATCTGTGCCGAGTTGGGTAGGTCA  
+  
FFFFFFFFFFFFFFFFFFFFFFFFFFFFFFFFFFFFFFFFFFFFFFFFFFFFF:FFF:FFFFFFFFFFFFFFFFFFFFFFFFFFFFF  
FFFFFFFFFFFFFFFFFFFFFFFFFFFFFFFFFFFFFFFFFFFFFFFFFFFFF:FFFFFFFFF,FFFFFFFFFFFFFFFFFFFFFFFFFFFFF  
@A00155:342:HHGFNDSXY:1:2167:10818:1282 1:N:0:GAACCTAG+TCCGCATA  
TCCGCCGTTGATGGCACGAAC TGGTATGCCGCAAACCTATGATGTACAGGGCTGCTGAAAAC TGGTC  
ATAAAGCCGGTTTTGCCCTACATATGCCCTCAACGCAGACCATATCTGTGCCGAGTTGGGTAGGT CAG  
+  
FFFFFFFFFFFFFFFFFFFFFFFFFFFFFFFFFFFFFFFFFFFFFFFFFFFFFFFFFFFFFFFFFFFFFFFFFFFFFFFFFFFFFFFF  
FFFFFFFFFFFFFFFFF:FFFFFFFFF,FFFFFFFFFFFFFFFFFFFFFFFFFFFFFFFFFFFFFFFFFFFFFFFFFFFFFFFFFFFFF  
@A00155:342:HHGFNDSXY:1:2167:12626:5071 1:N:0:GAACCTAG+TCCGCATA  
TCCGCCGTTGATGGCACGAAC TGGTATGCCGCAAACCTATGATGTACAGGGCTGCTGAAAAC TGGTC  
ATAAAGCCGGTTTTGCCCTACATATGCCCTCAACGCAGACCATATCTGTGCCGAGTTGGGTAGGT CAG  
+  
FFFFFFFFFFFFFFFFFFFFFFFFFFFFFFFFFFFFFFFFFFFFFFFFFFFFFFFFFFFFFFFFFFFFFFFFFFFFFFFFFFFFFFFF  
FFFFFFFFFFFFFFFFF:FFFFFFFFF,FFFFFFFFFFFFFFFFFFFFFFFFFFFFFFFFFFFFFFFFFFFFFFFFFFFFFFFFFFFFF  
@A00155:342:HHGFNDSXY:1:1153:24261:29418 1:N:0:GAACCTAG+TCCGCATA  
CCGCCGTTGATGGCACGAAC TGGTATGCCGCAAACCTATGATGTACAGGGCTGCTGAAAAC TGGTCA  
TAAAGCCGGTTTTGCCCTACATATGCCCTCAACGCAGACCATATCTGTGCCGAGTTGGGTAGGT CAGG  
+  
FFFFFFFFFFFFFFFFFFFFFFFFFFFFFFFFFFFFFFFFFFFFFFFFFFFFFFFFFFFFFFFFFFFFFFFFFFFFFFFFFFFFFFFF  
FFFFFFFFFFFFFFFFF:FFFFFFFFF,FFFFFFFFFFFFFFFFFFFFFFFFFFFFFFFFFFFFFFFFFFFFFFFFFFFFFFFFFFFFF  
@A00155:342:HHGFNDSXY:1:2123:4101:36620 1:N:0:GAACCTAG+TCCGCATA  
CCGCCGTTGATGGCACGAAC TGGTATGCCGCAAACCTATGATGTACAGGGCTGCTGAAAAC TGGTCA  
TAAAGCCGGTTTTGCCCTACATATGCCCTCAACGCAGACCATATCTGTGCCGAGTTGGGTAGGT CAGG  
+  
FFFFFFFFFFFFFFFFFFFFFFFFFFFFFFFFFFFFFFFFFFFFFFFFFFFFFFFFFFFFFFFFFFFFFFFFFFFFFFFFFFFFFFFF  
FFFFFFFFFFFFFFFFF:FFFFFFFFF,FFFFFFFFFFFFFFFFFFFFFFFFFFFFFFFFFFFFFFFFFFFFFFFFFFFFFFFFFFFFF  
@A00155:342:HHGFNDSXY:1:2415:27317:34303 1:N:0:GAACCTAG+TCCGCATA  
CCGCCGTTGATGGCACGAAC TGGTATGCCGCAAACCTATGATGTACAGGGCTGCTGAAAAC TGGTCA  
TAAAGCCGGTTTTGCCCTACATATGCCCTCAACGCAGACCATATCTGTGCCGAGTTGGGTAGGT CAGG  
+  
FFFFFFFFFFFFFFFFFFFFFFFFFFFFFFFFFFFFFFFFFFFFFFFFFFFFFFFFFFFFFFFFFFFFFFFFFFFFFFFFFFFFFFFF  
FFFFFFFFFFFFFFFFF:FFF  
FFF:FFFFFFFFFFFFFFFFFFFFFFFFFFFFFFFFFFFFFFFFFFFFFFFFFFFFFFFFFFFFFFFFFFFFFFFFFFFFFFFFFFFFF  
@A00155:342:HHGFNDSXY:1:2274:31421:26600 1:N:0:GAACCTAG+TCCGCATA  
CCGCCGTTGATGGCACGAAC TGGTATGCCGCAAACCTATGATGTACAGGGCTGCTGAAAAC TGGTCA  
TAAAGCCGGTTTTGCCCTACATATGCCCTCAACGCAGACCATATCTGTGCCGAGTTGGGTAGGT CAGG  
+  
FFFFFFFFFFFFFFFFFFFFFFFFFFFFFFFFFFFFFFFFFFFFFFFFFFFFFFFFFFFFFFFFFFFFFFFFFFFFFFFFFFFFFFFF  
FFFFFFFFFFFFFFFFF:FFF:FFFFFFFFFFFFFFFFFFFFFFFFFFFFF,FFFFF:FFFFFFFFFFFFFFFFFFFFFFFFFFFFF  
@A00155:342:HHGFNDSXY:1:2139:17137:18865 1:N:0:GAACCTAG+TCCGCATA  
CCGCCGTTGATGGCACGAAC TGGTATGCCGCAAACCTATGATGTACAGGGCTGCTGAAAAC TGGTCA  
TAAAGCCGGTTTTGCCCTACATATGCCCTCAACGCAGACCATATCTGTGCCGAGTTGGGTAGGT CAGG  
+  
FFFFFFFFFFFFFFFFFFFFFFFFFFFFFFFFFFFFFFFFFFFFFFFFFFFFFFFFFFFFFFFFFFFFFFFFFFFFFFFFFFFFFFFF  
FFFFFFFFFFFFFFFFF:FFFFFFFFFFFFFFFFFFFFFFFFFFFFFFFFFFFFFFFFFFFFFFFFFFFFFFFFFFFFFFFFFFFFF  
@A00155:342:HHGFNDSXY:1:2305:12753:32565 1:N:0:GAACCTAG+TCCGCATA  
CGCCGTTGATGGCACGAAC TGGTATGCCGCAAACCTATGATGTACAGGGCTGCTGAAAAC TGGTCAT  
AAAGCCGGTTTTGCCCTACATATGCCCTCAACGCAGACCATATCTGTGCCGAGTTGGGTAGGT CAGGT  
+  
FFFFFFFFFFFFFFFFFFFFFFFFFFFFFFFFFFFFFFFFFFFFFFFFFFFFFFFFFFFFFFFFFFFFFFFFFFFFFFFFFFFFFFFF  
FFFFFFFFFFFFFFFFF:FFFFFFFFFFFFFFFFFFFFFFFFFFFFFFFFFFFFFFFFFFFFFFFFFFFFFFFFFFFFFFFFFFFFF  
@A00155:342:HHGFNDSXY:1:1463:5746:14606 2:N:0:GAACCTAG+TCCGCATA  
CGCCGTTGATGGCACGAAC TGGTATGCCGCAAACCTATGATGTACAGGGCTGCTGAAAAC TGGTCAT

AAAGCCGGTTTTGCCCTACATATGCCCTCAACGCAGACCATATCTGTGCCGAGTTGGGTAGGTCAGGT  
+  
:FF,F:FFFFFF:FFFFFFFFFFFFFFFF,FFFFFFFFFFFFFFFFFFFFFFFFFFFFFFFFFFFFFFFF  
FFFFFFFFFFFFFFFF:FFFFFFFF:F:FFFFFFFF:FFFFFFFFFFFFFFFFFFFFFFFF  
@A00155:342:HHGFNDSXY:1:2462:21847:28369 1:N:0:GAACCTAG+TCCGCATA  
GCCGTTGATGGCACGAACCTGGTATGCCGCAAAACCTATGATGTACAGGGCTGCTGAAAACCTGGTCATA  
AAGCCGGTTTTGCCCTACATATGCCCTCAACGCAGACCATATCTGTGCCGAGTTGGGTAGGTCAGGTG  
+  
FFFFFFFFFFFFFFFFFFFFFFFFFFFFFFFFFFFFFFFFFFFFFFFFFFFFFFFFFFFFFFFF  
FFFFFFFFFFFFFFFFFFFFFFFFFFFFFFFFFFFFFFFFFFFFFFFFFFFFFFFFFFFFFFFF  
@A00155:342:HHGFNDSXY:1:2347:15429:2127 1:N:0:GAACCTAG+TCCGCATA  
GCCGTTGATGGCACGAACCTGGTATGCCGCAAAACCTATGATGTACAGGGCTGCTGAAAACCTGGTCATA  
AAGCCGGTTTTGCCCTACATATGCCCTCAACGCAGACCATATCTGTGCCGAGTTGGGTAGGTCAGGTG  
+  
FFFFFFFFFFFFFFFFFFFFFFFFFFFFFFFFFFFFFFFFFFFFFFFFFFFFFFFFFFFFFFFF  
F:FFFFFFFFFFFFFFFFFFFFFFFFFFFFFFFF:FFFFFFFFFFFFFFFFFFFFFFFF:FFFFFFFF  
@A00155:342:HHGFNDSXY:1:2341:4255:8547 1:N:0:GAACCTAG+TCCGCATA  
TTGATGGCACGAACCTGGTATGCCGCAAAACCTATGATGTACAGGGCTGCTGAAAACCTGGTCATAAAGC  
CGGTTTTGCCCTACATATGCCCTCAACGCAGACCATATCTGTGCCGAGTTGGGTAGGTCAGGTGCCCT  
+  
FFFFFFFFFFFF:FFFFFFFFFFFFFFFFFFFFFFFFFFFFFFFFFFFFFFFFFFFFFFFF  
FFFFFFFFFFFFFFFFFFFFFFFFFFFFFFFF:FFFFFFFFFFFFFFFFFFFFFFFFFFFFFFFF  
@A00155:342:HHGFNDSXY:1:1274:30861:31641 2:N:0:GAACCTAG+TCCGCATA  
TTGATGGCACGAACCTGGTATGCCGCAAAACCTATGATGTACAGGGCTGCTGAAAACCTGGTCATAAAGC  
CGGTTTTGCCCTACATATGCCCTCAACGCAGACCATATCTGTGCCGAGTTGGGTAGGTCAGGTGCCCT  
+  
FFFFFFFFFFFFFFFFFFFFFFFFFFFF:F:F:F:FFFFFFFFFFFFFFFFFFFFFFFFFFFFFFFF  
FFFFFFFF,F:FFFFFFFFFFFFFFFFFFFFFFFFFFFFFFFFFFFFFFFFFFFFFFFF  
@A00155:342:HHGFNDSXY:1:1263:20473:2628 2:N:0:GAACCTAG+TCCGCATA  
TTGATGGCACGAACCTGGTATGCCGCAAAACCTATGATGTACAGGGCTGCTGAAAACCTGGTCATAAAGC  
CGGTTTTGCCCTACATATGCCCTCAACGCAGACCATATCTGTGCCGAGTTGGGTAGGTCAGGTGCCCT  
+  
FFFFFFFFFFFFFFFFFFFFFFFFFFFFFFFF:FFFFFFFFFFFFFFFF:FFFFFFFFFFFF  
FFFFFFFFFFFFFFFFFFFFFFFFFFFFFFFF,F:FFFFFFFFFFFFFFFF:FFFFFFFFFFFF:  
@A00155:342:HHGFNDSXY:1:2323:6976:10755 2:N:0:GAACCTAG+TCCGCATA  
TTGATGGCACGAACCTGGTATGCCGCAAAACCTATGATGTACAGGGCTGCTGAAAACCTGGTCATAAAGC  
CGGTTTTGCCCTACATATGCCCTCAACGCAGACCATATCTGTGCCGAGTTGGGTAGGTCAGGTGCCCT  
+  
FFFFFFFFFFFFFFFFFFFFFFFFFFFFFFFF,F:FFFFFFFFFFFFFFFFFFFFFFFFFFFFFFFF  
:FF:FFFFFFFFFFFFFFFFFFFFFFFF:FFFFFFFFFFFFFFFFFFFFFFFFFFFFFFFF  
@A00155:342:HHGFNDSXY:1:2123:4101:36620 2:N:0:GAACCTAG+TCCGCATA  
TTGATGGCACGAACCTGGTATGCCGCAAAACCTATGATGTACAGGGCTGCTGAAAACCTGGTCATAAAGC  
CGGTTTTGCCCTACATATGCCCTCAACGCAGACCATATCTGTGCCGAGTTGGGTAGGTCAGGTGCCCT  
+  
FFFFFFFFFFFFFFFFFFFF:FFFFFF,F:FF:FFFFFFFFFFFFFFFFFFFFFFFFFFFFFFFF  
FFFFFFFFFFFFFFFFFFFFFFFFFFFFFFFFFFFFFFFFFFFFFFFFFFFFFFFFFFFFFFFF  
@A00155:342:HHGFNDSXY:1:2541:16785:23202 2:N:0:GAACCTAG+TCCGCATA  
TTGATGGCACGAACCTGGTATGCCGCAAAACCTATGATGTACAGGGCTGCTGAAAACCTGGTCATAAAGC  
CGGTTTTGCCCTACATATGCCCTCAACGCAGACCATATCTGTGCCGAGTTGGGTAGGTCAGGTGCCCT  
+  
FFFFFFFFF:FFFFFFFFFFFFFFFFFFFF:F:F,FFFFFF:FFFFFFFFFFFFFFFF:FFFF:FF  
FFFFFFFFFFFFFFFF:FFFFFFFFFFFFFFFF,F:FFFFFFFFFFFFFFFFFFFFFFFF  
@A00155:342:HHGFNDSXY:1:1538:4038:10019 1:N:0:GAACCTAG+TCCGCATA  
TTGATGGCACGAACCTGGTATGCCGCAAAACCTATGATGTACAGGGCTGCTGAAAACCTGGTCATAAAGC

CGGTTTTGCCCTACATATGCCCTCAACGCAGACCATATCTGTGCCGAGTTGGGTAGGTCAGGTGCCCT  
+  
FFFFFFFFFFFFFFFFFFFFFFFFFFFFFFFFFFFFFFFFFFFFFFFFFFFFFFFFFFFFFFFFFFFFFFFF  
FFFFFFFFFFFFFFFFFFFFFFFFFFFFFFFFFFFFFFFFFFFFFFFFFFFFFFFFFFFFFFFFFFFFFFFF  
@A00155:342:HHGFNDSXY:1:1478:32976:34334 2:N:0:GAACCTAG+TCCGCATA  
TGATGGCACGAAGTGGTATGCCGCAAAACCTATGATGTACAGGGCTGCTGAAAACCTGGTCATAAAGCC  
GGTTTTGCCCTACATATGCCCTCAACGCAGACCATATCTGTGCCGAGTTGGGTAGGTCAGGTGCCCTA  
+  
FF,FFFFFFFFFFFFFFFFFFFFFFFFFFFFFFFFFFFFFFFFFFFFFFFFFFFFFFFFFFFFFFFF,FFFFF  
FFFFFFFFFFFFFFFFFFFFFFFFFFFFFFFFFFFFFFFFFFFFFFFFFFFFFFFFFFFFFFFF:FFFFFFF  
@A00155:342:HHGFNDSXY:1:1152:17824:30326 2:N:0:GAACCTAG+TCCGCATA  
TGGCACGAAGTGGTATGCCGCAAAACCTATGATGTACAGGGCTGCTGAAAACCTGGTCATAAAGCCGGT  
TTTGCCCTACATATGCCCTCAACGCAGACCATATCTGTGCCGAGTTGGGTAGGTCAGGTGCCCTAG  
+  
FFFFFFFFFFFF:FFFFFFFFFFFFFFFFFFFFFFFFFFFFFFFFFFFFFFFFFFFFFFFFFFFFFFFFFFFF:FFFFFF:  
FFFFFFFFFFFFFFFFFFFFFFFFFFFFFFFFFFFFFFFFFFFFFFFFFFFFFFFFFFFFFFFF,FF  
@A00155:342:HHGFNDSXY:1:2113:26467:4773 2:N:0:GAACCTAG+TCCGCATA  
CACGAAGTGGTATGCCGCAAAACCTATGATGTACAGGGCTGCTGAAAACCTGGTCATAAAGCCGGTTTT  
GCCCTACATATGCCCTCAACGCAGACCATATCTGTGCCGAGTTGGGTAGGTCAGGTGCCCTAGCACCT  
+  
FFFFFFFFFFFFFFFFFFFFFFFFFFFFFFFFFFFFFFFFFFFFFFFFFFFFFFFFFFFFFFFFFFFFFFFF  
FFFFFFFFFFFFFFFFFFFFFFFFFFFFFFFFFFFFFFFFFFFFFFFFFFFFFFFFFFFFFFFFFFFFFFFF:  
@A00155:342:HHGFNDSXY:1:2677:1154:34460 2:N:0:GAACCTAG+TCCGCATA  
CACGAAGTGGTATGCCGCAAAACCTATGATGTACAGGGCTGCTGAAAACCTGGTCATAAAGCCGGTTTT  
GCCCTACATATGCCCTCAACGCAGACCATATCTGTGCCGAGTTGGGTAGGTCAGGTGCCCTAGCACCT  
+  
FFFFFFFFFF,,FFFFFFFFFFFFFFFFFFFF:F:F:FFF::FF:FFFFFFFFFFFF::FF,FFFFFFFF:F,F:  
FFFFFFFFFFFFFFFFFFFF:FFFFFFFFFFFFFFFFFFFF::FFFFFF:FFFFFFFFFFFFFFFFFFFF:FFFFF  
@A00155:342:HHGFNDSXY:1:1334:28429:27367 1:N:0:GAACCTAG+TCCGCATA  
CGAAGTGGTATGCCGCAAAACCTATGATGTACAGGGCTGCTGAAAACCTGGTCATAAAGCCGGTTTTGC  
CCTACATATGCCCTCAACGCAGACCATATCTGTGCCGAGTTGGGTAGGTCAGGTGCCCTAGCACCTTC  
+  
FFFFFFFFFFFFFFFFFFFFFFFFFFFFFFFFFFFFFFFFFFFFFFFFFFFFFFFFFFFFFFFFFFFFFFFF  
FFFFFFFFFFFFFFFFFFFFFFFFFFFFFFFFFFFFFFFFFFFFFFFFFFFFFFFFFFFFFFFFFFFFFFFF:FFFFF,FF  
@A00155:342:HHGFNDSXY:1:2542:19831:9596 1:N:0:GAACCTAG+TCCGCATA  
CGAAGTGGTATGCCGCAAAACCTATGATGTACAGGGCTGCTGAAAACCTGGTCATAAAGCCGGTTTTGC  
CCTACATATGCCCTCAACGCAGACCATATCTGTGCCGAGTTGGGTAGGTCAGGTGCCCTAGCACCTTC  
+  
FFFFFFFFFFFFFFFFFFFFFFFFFFFFFFFFFFFFFFFFFFFFFFFFFFFFFFFFFFFFFFFFFFFFFFFF  
FFFFFFFFFFFFFFFFFFFFFFFFFFFFFFFFFFFFFFFFFFFFFFFFFFFFFFFFFFFFFFFFFFFFFFFF:FF:F::F  
@A00155:342:HHGFNDSXY:1:2118:30337:13166 1:N:0:GAACCTAG+TCCGCATA  
AACTGGTATGCCGCAAAACCTATGATGTACAGGGCTGCTGAAAACCTGGTCATAAAGCCGGTTTTGCC  
TACATATGCCCTCAACGCAGACCATATCTGTGCCGAGTTGGGTAGGTCAGGTGCCCTAGCACCTTCCT  
+  
FFFFFFFFFFFFFFFFFFFFFFFFFFFFFFFFFFFFFFFFFFFFFFFFFFFFFFFFFFFFFFFFFFFFFFFF  
FFFFFFFFFFFFFFFFFFFFFFFFFFFFFFFFFFFFFFFFFFFFFFFFFFFFFFFFFFFFFFFFFFFFFFFF:FF:  
@A00155:342:HHGFNDSXY:1:2215:24397:22200 2:N:0:GAACCTAG+TCCGCATA  
AACTGGTATGCCGCAAAACCTATGATGTACAGGGCTGCTGAAAACCTGGTCATAAAGCCGGTTTTGCC  
TACATATGCCCTCAACGCAGACCATATCTGTGCCGAGTTGGGTAGGTCAGGTGCCCTAGCACCTTCCT  
+  
FFFFFFFFFFFFFFFFFFFFFFFFFFFFFFFFFFFFFFFFFFFFFFFFFFFFFFFFFFFFFFFFFFFFFFFF  
FFFFFFFFFFFFFFFFFFFFFFFFFFFFFFFFFFFFFFFFFFFFFFFFFFFFFFFFFFFFFFFFFFFFFFFF  
@A00155:342:HHGFNDSXY:1:2140:14534:18521 2:N:0:GAACCTAG+TCCGCATA  
ACTGGTATGCCGCAAAACCTATGATGTACAGGGCTGCTGAAAACCTGGTCATAAAGCCGGTTTTGCCCT

ACATATGCCCTCAACGCAGACCATATCTGTGCCGAGTTGGGTAGGTCAGGTGCCCTAGCACCTTCCTC  
+  
FFFFFFFFFFFFFFFF:F,FFF:FFFFFFFFFFFFFFFFFFFFFFFFFFFFFFFFFFFFFFFFFFFFFFFF  
FF,FFFFFFFFFFFFFFFFFFFFFFFFFFFFFFFFFFFFFFFFFFFFFFFFFFFFFFFFFFFFFFFF,FFFFFFFFFFFFFFFF  
@A00155:342:HHGFNDSXY:1:1262:15338:13714 1:N:0:GAACCTAG+TCCGCATA  
ACTGGTATGCCGCAAAACCTATGATGTACAGGGCTGCTGAAAACCTGGTCATAAAGCCGGTTTTGCCCT  
ACATATGCCCTCAACGCAGACCATATCTGTGCCGAGTTGGGTAGGTCAGGTGCCCTAGCACCTTCCTC  
+  
FFFFFFFFFFFFFFFFFFFFFFFFFFFFFFFFFFFFFFFFFFFFFFFFFFFFFFFFFFFFFFFFFFFFFFFF  
FFFFFFFFFFFFFFFFFFFFFFFFFFFFFFFFFFFFFFFFFFFFFFFFFFFFFFFFFFFFFFFFFFFFFFFF  
@A00155:342:HHGFNDSXY:1:1628:10890:28933 1:N:0:GAACCTAG+TCCGCATA  
CTGGTATGCCGCAAAACCTATGATGTACAGGGCTGCTGAAAACCTGGTCATAAAGCCGGTTTTGCCCTA  
CATATGCCCTCAACGCAGACCATATCTGTGCCGAGTTGGGTAGGTCAGGTGCCCTAGCACCTTCCTCC  
+  
FFFFFFFFFFFFFFFFFFFFFFFFFFFFFFFFFFFFFFFFFFFFFFFFFFFFFFFFFFFFFFFFFFFFFFFF  
FFFFFFFFFFFFFFFFFFFFFFFFFFFFFFFFFFFFFFFFFFFFFFFFFFFFFFFFFFFFFFFFFFFFFFFF,FF  
@A00155:342:HHGFNDSXY:1:2523:12816:19179 1:N:0:GAACCTAG+TCCGCATA  
CTGGTATGCCGCAAAACCTATGATGTACAGGGCTGCTGAAAACCTGGTCATAAAGCCGGTTTTGCCCTA  
CATATGCCCTCAACGCAGACCATATCTGTGCCGAGTTGGGTAGGTCAGGTGCCCTAGCACCTTCCTCC  
+  
FFFFFFFFFFFFFFFFFFFFFFFFFFFFFFFFFFFFFFFFFFFFFFFFFFFFFFFFFFFFFFFFFFFFFFFF  
FFFFFFFFFFFFFFFFFFFFFFFFFFFFFFFFFFFFFFFFFFFFFFFFFFFFFFFFFFFFFFFFFFFFFFFF  
@A00155:342:HHGFNDSXY:1:1628:10972:28980 1:N:0:GAACCTAG+TCCGCATA  
CTGGTATGCCGCAAAACCTATGATGTACAGGGCTGCTGAAAACCTGGTCATAAAGCCGGTTTTGCCCTA  
CATATGCCCTCAACGCAGACCATATCTGTGCCGAGTTGGGTAGGTCAGGTGCCCTAGCACCTTCCTCC  
+  
FFFFFFFFFFFFFFFFFFFFFFFFFFFFFFFFFFFFFFFFFFFFFFFFFFFFFFFFFFFFFFFFFFFFFFFF  
FFFFFFFFFFFFFFFFFFFFFFFFFFFFFFFFFFFFFFFFFFFFFFFFFFFFFFFFFFFFFFFFFFFFFFFF,FFFF  
@A00155:342:HHGFNDSXY:1:1138:18050:34413 2:N:0:GAACCTAG+TCCGCATA  
CTGGTATGCCGCAAAACCTATGATGTACAGGGCTGCTGAAAACCTGGTCATAAAGCCGGTTTTGCCCTA  
CATATGCCCTCAACGCAGACCATATCTGTGCCGAGTTGGGTAGGTCAGGTGCCCTAGCACCTTCCTCC  
+  
FFFFFFFFFFFFFFFF:F:FFFFFFFFFFFFFFFFFFFFFFFFFFFFFFFFFFFFFFFFFFFFFFFFFFFF  
FFFFFFFFFFFFFFFFFFFFFFFFFFFFFFFFFFFFFFFFFFFFFFFFFFFFFFFFFFFFFFFFFFFFFFFF:F:FFFFFFFFFFFF  
@A00155:342:HHGFNDSXY:1:1510:23249:2362 2:N:0:GAACCTAG+TCCGCATA  
CTGGTATGCCGCAAAACCTATGATGTACAGGGCTGCTGAAAACCTGGTCATAAAGCCGGTTTTGCCCTA  
CATATGCCCTCAACGCAGACCATATCTGTGCCGAGTTGGGTAGGTCAGGTGCCCTAGCACCTTCCTCC  
+  
FFFFFFFFFFFFFFFFFFFFFFFFFFFFFFFFFFFFFFFFFFFFFFFFFFFFFFFFFFFFFFFFFFFFFFFF  
FFFFFFFFFFFFFFFFFFFFFFFFFFFFFFFFFFFFFFFFFFFFFFFFFFFFFFFFFFFFFFFFFFFFFFFF  
@A00155:342:HHGFNDSXY:1:2253:15917:27524 1:N:0:GAACCTAG+TCCGCATA  
CTGGTATGCCGCAAAACCTATGATGTACAGGGCTGCTGAAAACCTGGTCATAAAGCCGGTTTTGCCCTA  
CATATGCCCTCAACGCAGACCATATCTGTGCCGAGTTGGGTAGGTCAGGTGCCCTAGCACCTTCCTCC  
+  
F:FFFFFFFFFFFFFFFFFFFFFFFFFFFFFFFFFFFFFFFFFFFFFFFFFFFFFFFFFFFFFFFFFFFF  
FFFFFFFFFFFFFFFFFFFFFFFFFFFFFFFFFFFFFFFFFFFFFFFFFFFFFFFFFFFFFFFFFFFFFFFF:FF  
@A00155:342:HHGFNDSXY:1:2210:17969:26663 2:N:0:GAACCTAG+TCCGCATA  
TGGTATGCCGCAAAACCTATGATGTACAGGGCTGCTGAAAACCTGGTCATAAAGCCGGTTTTGCCCTAC  
ATATGCCCTCAACGCAGACCATATCTGTGCCGAGTTGGGTAGGTCAGGTGCCCTAGCACCTTCCTCCC  
+  
FFFFFFFFFFFFFFFFFFFFFFFF:F:FFFFFFFFFFFF:F:FFFFFFFFFFFF:F:FFFFFFFFFFFF  
FFFFFFFFFFFFFFFFFFFFFFFFFFFFFFFF,FFFFFFFFFFFFFFFFFFFFFFFFFFFFFFFFFFFFFFFF  
@A00155:342:HHGFNDSXY:1:2210:19732:28526 2:N:0:GAACCTAG+TCCGCATA  
TGGTATGCCGCAAAACCTATGATGTACAGGGCTGCTGAAAACCTGGTCATAAAGCCGGTTTTGCCCTAC

+  
FFFFFFFFFFFFFFFFFFFFF:FFFFFFFFFFFFFFFFFFFFFF,FFFFFFFFFFFFFFFFFFFFFFFFFF:FF  
FFFFFFFFFFFFFFFFFFFFFFFFFFFFFFFFFFFFFFFFFFFFFFFFFFFFFFFFFFFFFFFFFFFFFFFF:F  
@A00155:342:HHGFNDSXY:1:2210:17924:27273 2:N:0:GAACCTAG+TCCGCATA  
TGGTATGCCGCAAAACCTCTGATGTACAGGGCTGCTGAAAACTGGTCATAAAGCCGGTTTTGCCCTAC  
ATATGCCCTCAACGCAGACCATATCTGTGCCGAGTTGGGTAGGTCAGGTGCCCTAGCACCTTCCTCCC  
+  
FFFFF:FF,FFFFFFFFFF,FFFFFFFFFFFFFFFFFFFFFFFFF:FFFFFFFFFFFFFF:F:FFF,FFFFFFF  
FFFFF:FFFFF:FFFFFFFFFFFFF:FFFFFFFFFFFFFFFFFFFF:FFFFFFFFFFFFFFFFFFFFF:FFFFFFFFF  
@A00155:342:HHGFNDSXY:1:1525:2347:26381 1:N:0:GAACCTAG+TCCGCATA  
TGGTATGCCGCAAAACCTATGATGTACAGGGCTGCTGAAAACTGGTCATAAAGCCGGTTTTGCCCTAC  
ATATGCCCTCAACGCAGACCATATCTGTGCCGAGTTGGGTAGGTCAGGTGCCCTAGCACCTTCCTCCC  
+  
FFFFFFF:FFFFFFFFFFFFFFFFFFFFFFFFFFFFFFFFFFFFFFFFFFFFFFFFFFFFFFFFFFFFFFFFF:FFFFFFF  
FFFFFFFFFFFFFFFFFFFF,FFFFFFFFFFFFFFFFFFFFFFFFFF:FFFFFFFFFFFFFFFFFFFFFFFFF:FFF:FFFF  
@A00155:342:HHGFNDSXY:1:2258:18719:15593 2:N:0:GAACCTAG+TCCGCATA  
TGGTATGCCGCAAAACCTATGATGTACAGGGCTGCTGAAAACTGGTCATAAAGCCGGTTTTGCCCTAC  
ATATGCCCTCAACGCAGACCATATCTGTGCCGAGTTGGGTAGGTCAGGTGCCCTAGCACCTTCCTCCC  
+  
FFFFFFFFFFFFFFFFFFFFF,FFFFFFFFFFFFFFFFFFFFFFFFFFFFFFFFFFFFFFFFFFFFFFFFFFFFFFFFF  
FFFFFFFFFFFFFFFFFFFFF:FFFFFFFFFFFFFFFFFFFFFFFFFFFFFFFFFFFFFFFFFFFFFFFFFFFFF:FFFFFFF  
@A00155:342:HHGFNDSXY:1:2210:16812:27320 2:N:0:GAACCTAG+TCCGCATA  
TGGTATGCCGCAAAACCTATGATGTACAGGGCTGCTGAAAACTGGTCATAAAGCCGGTTTTGCCCTAC  
ATATGCCCTCAACGCAGACCATATCTGTGCCGAGTTGGGTAGGTCAGGTGCCCTAGCACCTTCCTCCC  
+  
FFFFFFFFFFFFFFFFFFFFF:FFFFFFFFFFFFFFFFFFFFFFFFFFFFFFFFFFFFFFFFFFFFF:FFFFFFFFFFFFFFFFF  
FFFFFFFFFFFFFFFFFFFFFFFFFFFFFFFFFFFFFFFFFFFFFFFFFFFFFFFFFFFFFFFFFFFFFFFFFFFFF  
@A00155:342:HHGFNDSXY:1:2118:30337:13166 2:N:0:GAACCTAG+TCCGCATA  
ATGCCGCAAAACCTATGATGTACAGGGCTGCTGAAAACTGGTCATAAAGCCGGTTTTGCCCTACATAT  
GCCCTCAACGCAGACCATATCTGTGCCGAGTTGGGTAGGTCAGGTGCCCTAGCACCTTCCTCCCCCTTT  
+  
FF:F:FFFFFFFFF,FFFFF:FFFFFFFFFFFFFFFFFFFFFFFFFFFFF:FFFFFFFFFFFFFFFFFFFFFFFFF  
FFFFFFFFFFFFFFFFFFFFFFFFFFFFFFFFFFFFFFFFFFFFFFFFFFFFFFFFFFFFFFFFFFFFFFFFFFFFF:  
@A00155:342:HHGFNDSXY:1:1665:17833:1031 2:N:0:GAACCTAG+TCCGCATA  
TGCGCAGAACCTATGATGTACAGGGCTGCTGAAAACTGGTCATAAAGCCGGTTTTGCCCTACATATG  
CCCTCAACGCAGACCATATCTGTGCCGAGTTGGGTAGGTCAGGTGCCCTAGCACCTTCCT

+  
FFFFFFFFFFFFFFFFFFFFFFFFFFFFFFFFFFFFFFFFFFFFFFFFFFFFFFFFFFFFFFFFFFFFF:FFFFFFFFF  
FFFFFFFFFFFFFFFFFFFFFFFFFFFFFFFFFFFFFFFFFFFFFFFFFFFFFFFFFFFFFFFFFFFFFFFFFFFFF  
@A00155:342:HHGFNDSXY:1:2218:29613:7279 2:N:0:GAACCTAG+TCCGCATA  
GCCGCAAAACCTATGATGTACAGGGCTGCTGAAAACTGGTCATAAAGCCGGTTTTGCCCTACATATGC  
CTCAACGCAGACCATATCTGTGCCGAGTTGGGTAGGTCAGGTGCCCTAGCACCTTCCTCCCC

+  
FFFFFFFFFFFFFFFFFFFFFFFFFFFFFFFFFFFFFFFFFFFFF:FFFFFFFFFFFF:FFFFFFFFFFFFFFFFF  
FFFFFFFFFFFFF:FFFFFFFFFFFFFFFFFFFFFFFFFFFFFFFFFFFFFFFFFFFFFFFFFFFFFFFFFFFFF:FFFF  
@A00155:342:HHGFNDSXY:1:2218:27679:7874 2:N:0:GAACCTAG+TCCGCATA  
GCCGCAAAACCTATGATGTACAGGGCTGCTGAAAACTGGTCATAAAGCCGGTTTTGCCCTACATATGC  
CTCAACGCAGACCATATCTGTGCCGAGTTGGGTAGGTCAGGTGCCCTAGCACCTTCCTCCCC

+  
FFFFFFFFFFFFF:FFFFF,:FFFF,FFFFFFF:FFFFFFFFF:FFFFF,FFFFFFFFFFFFFFFFFFFFF:FF  
FFF:FF,FFFFFFFFFFFFFFFFFFFFF,FFFFFFFFF:FFFFFFFFFFFFFFFFFFFFFFFFF:FFFFFFFFF  
@A00155:342:HHGFNDSXY:1:2258:18719:15593 1:N:0:GAACCTAG+TCCGCATA  
CGCAAAAACCTATGATGTACAGGGCTGCTGAAAACTGGTCATAAAGCCGGTTTTGCCCTACATATGCC

CTCAACGCAGACCATATCTGTGCCGAGTTGGGTAGGTCAGGTGCCCTAGCACCTTCCTCCCCTTTCAA  
+  
FFFFFFF,FFFFFFFFFFFFFFFFFFFFFFFFFFFFFFFFFFFFFFFFFFFFFFFFFFFFFFFFFFFFFFFF  
FFFFFFFFFFFFFFFFFFFFFFFFFFFFFFFFFFFFFFFFFFFFFFFFFFFFFFFFFFFFFFFFFFFFFFFF  
@A00155:342:HHGFNDSXY:1:1672:20844:26725 2:N:0:GAACCTAG+TCCGCATA  
CGCAAAACCTATGATGTACAGGGCTGCTGAAAACCTGGTCATAAAGCCGGTTTTGCCCTACATATGCC  
TCAACGCAGACCATATCTGTGCCGAGTTGGGTAGGTCAGGTGCCCTAGCACCTTCCTCCCCTTTCAAC  
+  
FFFFFFFFFFFFFFFFFFFFFFFFFFFFFFFFFFFFFFFFFFFFFFFFFFFFFFFFFFFFFFFFFFFFFFFF  
FFFFFFFFFFFFFFFFFFFFFFFFFFFFFFFFFFFFFFFFFFFFFFFFFFFFFFFFFFFFFFFFFFFFFFFF  
@A00155:342:HHGFNDSXY:1:2305:12753:32565 2:N:0:GAACCTAG+TCCGCATA  
GCAAAACCTATGATGTACAGGGCTGCTGAAAACCTGGTCATAAAGCCGGTTTTGCCCTACATATGCCCT  
CAACGCAGACCATATCTGTGCCGAGTTGGGTAGGTCAGGTGCCCTAGCACCTTCCTCCCCTTTCAACC  
+  
FFFFFFFFFFFFFFFFFFFFFFFFFFFFFFFFFFFFFFFFFFFFFFFFFFFFFFFFFFFFFFFFFFFFFFFF  
FFFFFFFFFFFFFFFFFFFFFFFFFFFFFFFFFFFFFFFFFFFFFFFFFFFFFFFFFFFFFFFFFFFFFFFF  
@A00155:342:HHGFNDSXY:1:2638:32380:17581 1:N:0:GAACCTAG+TCCGCATA  
CAAAACCTATGATGTACAGGGCTGCTGAAAACCTGGTCATAAAGCCGGTTTTGCCCTACATATGCCCTC  
AACGCAGACCATATCTGTGCCGAGTTGGGTAGGTCAGGTGCCCTAGCACCTTCCTCCCCTTTCAACCA  
+  
FFFFFFFFFFFFFFFFFFFFFFFFFFFFFFFFFFFFFFFFFFFFFFFFFFFFFFFFFFFFFFFFFFFFFFFF  
FFFFFFFFFFFFFFFFFFFFFFFFFFFFFFFFFFFFFFFFFFFFFFFFFFFFFFFFFFFFFFFFFFFFFFFF  
@A00155:342:HHGFNDSXY:1:2507:12084:22420 1:N:0:GAACCTAG+TCCGCATA  
CAAAACCTATGATGTACAGGGCTGCTGAAAACCTGGTCATAAAGCCGGTTTTGCCCTACATATGCCCTC  
AACGCAGACCATATCTGTGCCGAGTTGGGTAGGTCAGGTGCCCTAGCACCTTCCTCCCCTTTCAACCA  
+  
FFFFFFFFFFFFFFFFFFFFFFFFFFFFFFFFFFFFFFFFFFFFFFFFFFFFFFFFFFFFFFFFFFFFFFFF  
FFFFFFFFFFFFFFFFFFFFFFFFFFFFFFFFFFFFFFFFFFFFFFFFFFFFFFFFFFFFFFFFFFFFFFFF:  
@A00155:342:HHGFNDSXY:1:2215:3197:7874 2:N:0:GAACCTAG+TCCGCATA  
AACCTATGATGTACAGGGCTGCTGAAAACCTGGTCATAAAGCCGGTTTTGCCCTACATATGCCCTCAAC  
GCAGACCATATCTGTGCCGAGTTGGGTAGGTCAGGTGCCCTAGCACCTTCCTCCCCTTTCAACCATGC  
+  
F:FFFFFFFFFFFFFFFFFFFFFFFFFFFFFFFFFFFFFFFFFFFFFFFFFFFFFFFFFFFFFFFFFFFF  
FFF:FFFFFFFFFFFFFFFFFFFFFFFFFFFFFFFFFFFFFFFFFFFFFFFFFFFFFFFFFFFFFFFFFFFF  
@A00155:342:HHGFNDSXY:1:2410:5493:1047 2:N:0:GAACCTAG+TCCGCATA  
CCTATGATGTACAGGGCTGCTGAAAACCTGGTCATAAAGCCGGTTTTGCCCTACATATGCCCTCAACGC  
AGACCATATCTGTGCCGAGTTGGGTAGGTCAGGTGCCCTAGCACCTTCCTCCCCTTTCAACCATGCGT  
+  
F,FFFFFFFF,F,FFFFFFFF:FFFFFFFFFFFFFFFFFFFFFFFFFFFFFFFFFFFFFFFFFFFFFFFF:  
F:FFFFFFFFFFFFFFFFFFF:F:FF:FFFFFFFFFFFFFFFFFFFFFFFFFFFFFFFFFFFFFFFF:  
@A00155:342:HHGFNDSXY:1:2409:5086:37043 2:N:0:GAACCTAG+TCCGCATA  
CCTATGATGTACAGGGCTGCTGAAAACCTGGTCATAAAGCCGGTTTTGCCCTACATATGCCCTCAACGC  
AGACCATATCTGTGCCGAGTTGGGTAGGTCAGGTGCCCTAGCACCTTCCTCCCCTTTCAACCATGCGT  
+  
FF,FFFFFFFFFFFFFFFFFFFFFFFF, :FFFFFFFFFFFFFFFFFFFFFFFF,FFFFF:FF:FFF,FFFFFFF  
FFFFFFFFFFFFFFFFFFFFFFFFFFFFFFFFFFFFFFFFFFFFFFFFFFFFFFFFFFFFFFFFFFFFFFFF  
@A00155:342:HHGFNDSXY:1:1665:17833:1031 1:N:0:GAACCTAG+TCCGCATA  
GATGTACAGGGCTGCTGAAAACCTGGTCATAAAGCCGGTTTTGCCCTACATATGCCCTCAACGCAGACC  
ATATCTGTGCCGAGTTGGGTAGGTCAGGTGCCCTAGCACCTTCCTCCCCTTTCAACCATGC  
+  
FFFFFFFFFFFFFFFFFFFFFFFFFFFFFFFFFFFFFFFFFFFFFFFFFFFFFFFFFFFFFFFFFFFFFFFF  
FFFFFFFFFFFFFFFFFFFFFFFFFFFFFFFFFFFFFFFFFFFFFFFFFFFFFFFFFFFFFFFFFFFFFFFF,  
@A00155:342:HHGFNDSXY:1:1303:22073:21684 2:N:0:GAACCTAG+TCCGCATA  
GATGTACAGGGCTGCTGAAAACCTGGTCATAAAGCCGGTTTTGCCCTACATATGCCCTCAACGCAGACC

ATATCTGTGCCGAGTTGGGTAGGTCAGGTGCCCTAGCACCTTCCTCCCCTTTCAACCATGCGTC  
+  
FFFFFFFFFFFFFFFFFFFFFFF:FFFFFFFFFFFFFFFFFFFFFFFFFFFFF:F:FFFFFFFFFFFFFFFFFFFFFFF  
FFFFFFFFFFFFFFFFFFFFFFFFFFFFFFFFFFFFFFFFFFFFFFFFFFFFFFFFF:FFFFFFFFFFFFFFFFFFFFF:FFFFFFF  
@A00155:342:HHGFNDSXY:1:1127:1949:7341 2:N:0:GAACCTAG+TCCGCATA  
GATGTACAGGGCTGCTGAAAACTGGTCATAAAGCCGGTTTTGCCCTACATATGCCCTCAACGCAGACC  
ATATCTGTGCCGAGTTGGGTAGGTCAGGTGCCCTAGCACCTTCCTCCCCTTTCAACCATGCGTC  
+  
F:FFFFFFFFFFFFFFFFFFFFFFFFFFFFFFFFFFFFFFFFFFFFFFFFFFFFF,FFFFFFFFFFFFFFFFFFFFFFFFF  
FFFFFFFFFFFFFFFFFFFFFFFFFFFFFFFFFFFFFFFFFFFFFFFFFFFFFFFFF:FFFFFFFFFFFFFFFFFFFFFFFFFFFFFFFFF  
@A00155:342:HHGFNDSXY:1:1303:21305:6856 2:N:0:GAACCTAG+TCCGCATA  
GATGTACAGGGCTGCTGAAAACTGGTCATAAAGCCGGTTTTGCCCTACATATGCCCTCAACGCAGACC  
ATATCTGTGCCGAGTTGGGTAGGTCAGGTGCCCTAGCACCTTCCTCCCCTTTCAACCATGCGTC  
+  
FFFFFFFFFFFFFFFFFFFFFFFFFFFFFFFFFFFFFFFFFFFFFFFFFFFFFFFFF  
FFFFFFFFFFFFFFFFFFFFF:FFFFF:FFFFFFF:FFFFFFFFF:FFFFFFFFFFFFF:FFFFFFFFFFFFF  
@A00155:342:HHGFNDSXY:1:2167:12626:5071 2:N:0:GAACCTAG+TCCGCATA  
GATGTACAGGGCTGCTGAAAACTGGTCATAAAGCCGGTTTTGCCCTACATATGCCCTCAACGCAGACC  
ATATCTGTGCCGAGTTGGGTAGGTCAGGTGCCCTAGCACCTTCCTCCCCTTTCAACCATGCGTC  
+  
F,FFFFFFFF:FFFFFFFFFFFFFFFFFFFFFFFFFFFFFFFFFFFFFFFFFFFFF:FFFFFFFFFFFFFFFFFFFFFFFFF  
FFFFFFFFFFFFFFFFFFFFFFFFFFFFFFFFFFFFFFFFFFFFFFFFFFFFFFFFF  
@A00155:342:HHGFNDSXY:1:2167:10818:1282 2:N:0:GAACCTAG+TCCGCATA  
GATGTACAGGGCTGCTGAAAACTGGTCATAAAGCCGGTTTTGCCCTACATATGCCCTCAACGCAGACC  
ATATCTGTGCCGAGTTGGGTAGGTCAGGTGCCCTAGCACCTTCCTCCCCTTTCAACCATGCGTC  
+  
FFFFFFFFF:FFFFFFFFFFFFFFFFFFFFFFFFF:FFFFFFFFFFF,FFFFFFFFFFF:FFFFFFFFF:FFFFFFFFF  
FFFFFFFFFFFFFFFFFFFFFFFFFFFFFFFFFFFFFFFFFFFFFFFFFFFFFFFFF  
@A00155:342:HHGFNDSXY:1:2645:15465:36761 2:N:0:GAACCTAG+TCCGCATA  
GATGTACAGGGCTGCTGAAAACTGGTCATAAAGCCGGTTTTGCCCTACATATGCCCTCAACGCAGACC  
ATATCTGTGCCGAGTTGGGTAGGTCAGGTGCCCTAGCACCTTCCTCCCCTTTCAACCATGCGTC  
+  
FFFFFFFFFF:FFFFFFFFFFFFF:FFFFFFFFFF:FF::FFFFFFFFF,FFFFFFFFFFFFFFFFFFFFF:FFFFFFF  
FFFFF:FFFFFFFFFFFFFFFFFFFFFFFFFFFFF,FF:,FFFFFFFFF:FFFFFFFFFFFFFFFFFFFFFFFFF  
@A00155:342:HHGFNDSXY:1:2366:18936:35321 2:N:0:GAACCTAG+TCCGCATA  
GATGTACAGGGCTGCTGAAAACTGGTCATAAAGCCGGTTTTGCCCTACATATGCCCTCAACGCAGACC  
ATATCTGTGCCGAGTTGGGTAGGTCAGGTGCCCTAGCACCTTCCTCCCCTTTCAACCATGCGTC  
+  
FFFFFFFFFFFFFFFFFFFFFFFFFFFFFFFFFFFFFFFFFFFFFFFFFFFFFFFFF  
FFFFFFFFFFFFFFFFFFFFFFFFFFFFFFFFFFFFFFFFFFFFFFFFFFFFFFFFF  
@A00155:342:HHGFNDSXY:1:2347:15429:2127 2:N:0:GAACCTAG+TCCGCATA  
GATGTACAGGGCTGCTGAAAACTGGTCATAAAGCCGGTTTTGCCCTACATATGCCCTCAACGCAGACC  
ATATCTGTGCCGAGTTGGGTAGGTCAGGTGCCCTAGCACCTTCCTCCCCTTTCAACCATGCGTC  
+  
FFFFFFFFFFFFFFFFFFFFFFFFFFFFFFFFFFFFFFFFFFFFFFFFFFFFFFFFF  
:FFFFFFFFFFFFFFFFFFFFFFFFFFFFFFFFFFFFFFFFFFFFFFFFFFFFFFFFF  
@A00155:342:HHGFNDSXY:1:2218:29613:7279 1:N:0:GAACCTAG+TCCGCATA  
ATGTACAGGGCTGCTGAAAACTGGTCATAAAGCCGGTTTTGCCCTACATATGCCCTCAACGCAGACCA  
TATCTGTGCCGAGTTGGGTAGGTCAGGTGCCCTAGCACCTTCCTCCCCTTTCAACCATGCGTC  
+  
FFFFFFFFFFFFFFFFFFFFFFFFFFFFFFFFFFFFFFFFFFFFFFFFFFFFFFFFF  
FFFFFFFFFFFFFFFFFFFFF:FFFFFFFFFFFFFFFFFFFFFFFFFFFFFFFFF  
@A00155:342:HHGFNDSXY:1:2343:24975:9079 1:N:0:GAACCTAG+TCCGCATA  
ATGTACAGGGCTGCTGAAAACTGGTCATAAAGCCGGTTTTGCCCTACATATGCCCTCAACGCAGACCA

TATCTGTGCCGAGTTGGGTAGGTCAGGTGCCCTAGCACCTTCCTCCCCTTTCAACCATGCGTCCACCC  
+  
FFFFFFFFFFFFFFFFFFFFFFFFFFFFFFFFFFFFFFFFFFFFFFFFFFFFFFFFFFFFFFFFFFFFFFFF  
FFFFFFFFFFFFFFFFFFFFFFFFFFFFFFFFFFFFFFFFFFFFFFFFFFFFFFFFFFFFFFFFFFFFFFFF  
@A00155:342:HHGFNDSXY:1:1127:1949:7341 1:N:0:GAACCTAG+TCCGCATA  
ATGTACAGGGCTGCTGAAAAGTGGTCATAAAGCCGGTTTTGCCCTACATATGCCCTCAACGCAGACCA  
TATCTGTGCCGAGTTGGGTAGGTCAGGTGCCCTAGCACCTTCCTCCCCTTTCAACCATGCGTCCACCC  
+  
FFFFF:FFFFFFFFF:FFFFFFF,F,FFFFFF,FFFFF:FFFFFFFFFFFFFFFFF,FFFFFFFFFFFFFFF  
FFFFFFFFFFFFFFFFF:FFFFFFFFFFFFFFFFFFFFFFFFFFFFFFFFFFFFFFFFF:FFFFFF:FFFFFF:FF:FFF  
@A00155:342:HHGFNDSXY:1:1131:1669:21668 1:N:0:GAACCTAG+TCCGCATA  
ATGTACAGGGCTGCTGAAAAGTGGTCATAAAGCCGGTTTTGCCCTACATATGCCCTCAACGCAGACCA  
TATCTGTGCCGAGTTGGGTAGGTCAGGTGCCCTAGCACCTTCCTCCCCTTTCAACCATGCGTCCACCC  
+  
FFFFFFFFFFFFFFFFFFFFFFFFFFFFFFFFFFFFFFFFFFFFFFFFFFFFFFFFFFFFFFFFFFFFFFFF:FFFFFFF  
FFFFFFFFF:FFFFFFFFFFFFFFFFFFFFFFFFFFFFFFFFFFFFFFFFF:FFFFFF:FFFFFFFFFFFFFFFFF  
@A00155:342:HHGFNDSXY:1:1632:11514:6370 1:N:0:GAACCTAG+TCCGCATA  
ATGTACAGGGCTGCTGAAAAGTGGTCATAAAGCCGGTTTTGCCCTACATATGCCCTCAACGCAGACCA  
TATCTGTGCCGAGTTGGGTAGGTCAGGTGCCCTAGCACCTTCCTCCCCTTTCAACCATGCGTCCACCC  
+  
FFFFFFFFFFFFFFFFFFFFFFFFFFFFFFFFFFFFFFFFFFFFFFFFFFFFFFFFFFFFFFFFFFFFFFFF:FFF  
FFFFFFFFFFFFFFFFFFFFFFFFFFFFFFFFFFFFFFFFFFFFFFFFFFFFFFFFFFFFFFFFFFFFFFFFF  
@A00155:342:HHGFNDSXY:1:1625:5421:15734 1:N:0:GAACCTAG+TCCGCATA  
ATGTACAGGGCTGCTGAAAAGTGGTCATAAAGCCGGTTTTGCCCTACATATGCCCTCAACGCAGACCA  
TATCTGTGCCGAGTTGGGTAGGTCAGGTGCCCTAGCACCTTCCTCCCCTTTCAACCATGCGTCCACCC  
+  
FFFFFFFFFFFFFFFFFFFFFFFFFFFFFFFFFFFFFFFFFFFFFFFFFFFFFFFFFFFFFFFFFFFFFFFF:FFF  
:FFFFFFFFFFFFFFFFF:FFFFFFFFFFFFFFFFFFFFFFFFFFFFFFFFF:FFFFFFFFFFFFFFFFFFFFFFFFF  
@A00155:342:HHGFNDSXY:1:1302:5683:9987 1:N:0:GAACCTAG+TCCGCATA  
ATGTACAGGGCTGCTGAAAAGTGGTCATAAAGCCGGTTTTGCCCTACATATGCCCTCAACGCAGACCA  
TATCTGTGCCGAGTTGGGTAGGTCAGGTGCCCTAGCACCTTCCTCCCCTTTCAACCATGCGTCCACCC  
+  
FFFFFFFFFFFFFFFFFFFFFFFFFFFFFFFFFFFFFFFFFFFFFFFFFFFFFFFFFFFFFFFFFFFFFFFF:F:FFFF:::FFFF:FF:FFFFFF:FFFFF:FFFFFFFFFFFFFFFFF  
FFFFFFFFFFFFF:FFFFFFFFFFFFFFFFFFFFFFFFFFFFFFFFFFFFFFFFF:,FFFFFFFFFFFFFFFFFFFFFFFFFFFFFFFFF  
@A00155:342:HHGFNDSXY:1:2218:27679:7874 1:N:0:GAACCTAG+TCCGCATA  
TGTACAGGGCTGCTGAAAAGTGGTCATAAAGCCGGTTTTGCCCTACATATGCCCTCAACGCAGACCAT  
ATCTGTGCCGAGTTGGGTAGGTCAGGTGCCCTAGCACCTTCCTCCCCTTTCAACCATGCGTC  
+  
FFFFFFFFFFFFFFFFF:FF:FFFFFFFFF:FFFFF:FF::FFFFFFFFFFFFFFFFF:FFFF:FFFF:F,FFFF  
F:FFFF,F:FFFFFFFFF:FFFF:,FF,F::FFFFFFFFF:F:FFFFF:FFFFFFFFF:FFFFF  
@A00155:342:HHGFNDSXY:1:2624:27236:22263 1:N:0:GAACCTAG+TCCGCATA  
TGTACAGGGCTGCTGAAAAGTGGTCATAAAGCCGGTTTTGCCCTACATATGCCCTCAACGCAGACCAT  
ATCTGTGCCGAGTTGGGTAGGTCAGGTGCCCTAGCACCTTCCTCCCCTTTCAACCATGCGTCCACCCC  
+  
FFFFFFFFFFFFFFFFFFFFFFFFFFFFFFFFFFFFFFFFFFFFFFFFFFFFFFFFFFFFFFFFFFFFFFFF:FFFFFFFFFFFFFFFFFFFFFFFFFFFFFFFFF  
FFFFFFFFFFFFFFFFFFFFFFFFFFFFFFFFFFFFFFFFFFFFFFFFFFFFFFFFFFFFFFFFFFFFFFFF:FFFFFF,FFFFF,FFFFFFFFFFFFFFFFF,:FFFF  
@A00155:342:HHGFNDSXY:1:2624:29134:17942 1:N:0:GAACCTAG+TCCGCATA  
TGTACAGGGCTGCTGAAAAGTGGTCATAAAGCCGGTTTTGCCCTACATATGCCCTCAACGCAGACCAT  
ATCTGTGCCGAGTTGGGTAGGTCAGGTGCCCTAGCACCTTCCTCCCCTTTCAACCATGCGTCCACCCC  
+  
FFFFFFFFFFFFFFFFFFFFFFFFFFFFFFFFFFFFFFFFFFFFFFFFFFFFFFFFFFFFFFFFFFFFFFFFF  
FFFFFFFFFFFFFFFFFFFFFFFFFFFFFFFFFFFFFFFFFFFFFFFFFFFFFFFFFFFFFFFFFFFFFFFFF:FFFFFFFFFFFFFFFFF  
@A00155:342:HHGFNDSXY:1:2568:3775:2738 1:N:0:GAACCTAG+TCCGCATA  
TGTACAGGGCTGCTGAAAAGTGGTCATAAAGCCGGTTTTGCCCTACATATGCCCTCAACGCAGACCAT



ATCTGTGCCGAGTTGGGTAGGTCAGGTGCCCTAGCACCTTCCTCCCCTTTCAACCATGCGTCCACCCC  
+  
FFFFFFFFFFFFFFFFFFFFFFFFFFFFFFFFFFFFFFFFFFFFFFFFFFFFFFFFFFFFFFFFFFFFFFFF  
FFFFFFFFFFFFFFFFFFFFFFFFFFFFFFFFFFFFFFFFFFFFFFFFFFFFFFFFFFFFFFFFFFFFFFFF  
@A00155:342:HHGFNDSXY:1:1375:25527:14074 1:N:0:GAACCTAG+TCCGCATA  
TGTACAGGGCTGCTGAAAAGTGGTCATAAAGCCGGTTTTGCCCTACATATGCCCTCAACGCAGACCAT  
ATCTGTGCCGAGTTGGGTAGGTCAGGTGCCCTAGCACCTTCCTCCCCTTTCAACCATGCGTCCACCCC  
+  
FFFFFFFFFFFFFFFFFFFFFFFFFFFFFFFFFFFFFFFFFFFFFFFFFFFFFFFFFFFFFFFFFFFFFFFF  
FFFFFFFFFFFFFFFFFFFFFFFFFFFFFFFFFFFFFFFFFFFFFFFFFFFFFFFFFFFFFFFFFFFFFFFF  
@A00155:342:HHGFNDSXY:1:2142:21685:15029 1:N:0:GAACCTAG+TCCGCATA  
TGTACAGGGCTGCTGAAAAGTGGTCATAAAGCCGGTTTTGCCCTACATATGCCCTCAACGCAGACCAT  
ATCTGTGCCGAGTTGGGTAGGTCAGGTGCCCTAGCACCTTCCTCCCCTTTCAACCATGCGTCCACCCC  
+  
FFFFFFFFFFFFFFFFFFFFFFFFFFFFFFFFFFFFFFFFFFFFFFFFFFFFFFFFFFFFFFFFFFFFFFFF  
FFFFFFFFFFFFFFFFFFFFFFFFFFFFFFFFFFFFFFFFFFFFFFFFFFFFFFFFFFFFFFFFFFFFFFFF  
@A00155:342:HHGFNDSXY:1:2578:3088:29731 1:N:0:GAACCTAG+TCCGCATA  
TGTACAGGGCTGCTGAAAAGTGGTCATAAAGCCGGTTTTGCCCTACATATGCCCTCAACGCAGACCAT  
ATCTGTGCCGAGTTGGGTAGGTCAGGTGCCCTAGCACCTTCCTCCCCTTTCAACCATGCGTCCACCCC  
+  
FFFFFFFFFFFFFFFFFFFFFFFFFFFFFFFFFFFFFFFFFFFFFFFFFFFFFFFFFFFFFFFFFFFFFFFF  
FFFFFFFFFFFFFFFFFFFFFFFFFFFFFFFFFFFFFFFFFFFFFFFFFFFFFFFFFFFFFFFFFFFFFFFF  
@A00155:342:HHGFNDSXY:1:1115:11505:14403 1:N:0:GAACCTAG+TCCGCATA  
GTACAGGGCTGCTGAAAAGTGGTCATAAAGCCGGTTTTGCCCTACATATGCCCTCAACGCAGACCATA  
TCTGTGCCGAGTTGGGTAGGTCAGGTGCCCTAGCACCTTCCTCCCCTTTCAACCATGCGTCCACCCCG  
+  
FFFFFFFFFFFFFFFFFFFFFFFFFFFFFFFFFFFFFFFFFFFFFFFFFFFFFFFFFFFFFFFFFFFFFFFF  
FFFFFFFFFFFFFFFFFFFFFFFFFFFFFFFFFFFFFFFFFFFFFFFFFFFFFFFFFFFFFFFFFFFFFFFF  
@A00155:342:HHGFNDSXY:1:1377:19334:10269 1:N:0:GAACCTAG+TCCGCATA  
GTACAGGGCTGCTGAAAAGTGGTCATAAAGCCGGTTTTGCCCTACATATGCCCTCAACGCAGACCATA  
TCTGTGCCGAGTTGGGTAGGTCAGGTGCCCTAGCACCTTCCTCCCCTTTCAACCATGCGTCCACCCCG  
+  
FFFFFFFFFFFFFFFFFFFFFFFFFFFFFFFFFFFFFFFFFFFFFFFFFFFFFFFFFFFFFFFFFFFFFFFF  
FFFF,FFFFFFFFFFFFFFFFFFFFFFFFFFFFFFFFFFFFFFFFFFFFFFFFFFFFFFFFFFFFFFFF  
@A00155:342:HHGFNDSXY:1:2210:4227:7686 1:N:0:GAACCTAG+TCCGCATA  
GTACAGGGCTGCTGAAAAGTGGTCATAAAGCCGGTTTTGCCCTACATATGCCCTCAACGCAGACCATA  
TCTGTGCCGAGTTGGGTAGGTCAGGTGCCCTAGCACCTTCCTCCCCTTTCAACCATGCGTCCACCCCG  
+  
FFFFFFFFFFFFFFFFFFFFFFFFFFFFFFFFFFFFFFFFFFFFFFFFFFFFFFFFFFFFFFFFFFFFFFFF  
FF,:FFFFFFFF,FFFFFFFF:FFFFFFFF,FFFFFFFFFFFFFFFFFFFFFFFF:FF::FFFFFFFF  
@A00155:342:HHGFNDSXY:1:1372:32362:15890 1:N:0:GAACCTAG+TCCGCATA  
GTACAGGGCTGCTGAAAAGTGGTCATAAAGCCGGTTTTGCCCTACATATGCCCTCAACGCAGACCATA  
TCTGTGCCGAGTTGGGTAGGTCAGGTGCCCTAGCACCTTCCTCCCCTTTCAACCATGCGTCCACCCCG  
+  
FFFFFFFFFFFFFFFFFFFFFFFFFFFFFFFFFFFFFFFFFFFFFFFFFFFFFFFFFFFFFFFFFFFFFFFF  
FFFF,FF,FFFFFFFF,FFFFFF:FFFFFF:FF:F  
FFFF:FFFFFFFF:FFFF:FFFF:FFFF:F::FFFFFFFF:FFFFFF:FFFF  
@A00155:342:HHGFNDSXY:1:2210:4128:7827 1:N:0:GAACCTAG+TCCGCATA  
GTACAGGGCTGCTGAAAAGTGGTCATAAAGCCGGTTTTGCCCTACATATGCCCTCAACGCAGACCATA  
TCTGTGCCGAGTTGGGTAGGTCAGGTGCCCTAGCACCTTCCTCCCCTTTCAACCATGCGTCCACCCCG  
+  
FFFFFFFFFFFFFFFFFFFFFFFFFFFFFFFFFFFFFFFFFFFFFFFFFFFFFFFFFFFFFFFFFFFFFFFF  
FFFFFFFFFFFFFFFFFFFFFFFFFFFFFFFFFFFFFFFFFFFFFFFFFFFFFFFFFFFFFFFFFFFFFFFF  
@A00155:342:HHGFNDSXY:1:1413:21007:11099 1:N:0:GAACCTAG+TCCGCATA  
GTACAGGGCTGCTGAAAAGTGGTCATAAAGCCGGTTTTGCCCTACATATGCCCTCAACGCAGACCATA

TCTGTGCCGAGTTGGGTAGGTCAGGTGCCCTAGCACCTTCCTCCCCTTTCAACCATGCGTCCACCCCG  
+  
FFFFFFFFFFFF,F,FFFFFF:FFFF,,FFFFFF::FFFF,F,:FFFFFF:FF:FFFFFF,,:FFFFFF  
:F:FF,FF:FFFFFFFFFFFFFF:FFFF:FFFF:FF:F:,FFF:,FF::FF:F:F,FFF:F:FFFFFF  
@A00155:342:HHGFNDSXY:1:2137:27037:28307 1:N:0:GAACCTAG+TCCGCATA  
GTACAGGGCTGCTGAAAAGTGGTCATAAAGCCGGTTTTGCCCTACATATGCCCTCAACGCAGACCATA  
TCTGTGCCGAGTTGGGTAGGTCAGGTGCCCTAGCACCTTCCTCCCCTTTCAACCATGCGTCCACCCCG  
+  
FFFFFFFFFFFFFFFFFFFFFFFFFFFFFFFFFFFFFFFFFFFFFFFFFFFFFFFFFFFFFFFFFFFFFFFF  
FFFFFFFFFFFFFFFFFFFFFFFFFFFFFFFF:FFFFFFFF,FFFFFFFFFFFFFFFFFFFFFFFF:F:FFFF  
@A00155:342:HHGFNDSXY:1:1446:9218:33364 1:N:0:GAACCTAG+TCCGCATA  
TACAGGGCTGCTGAAAAGTGGTCATAAAGCCGGTTTTGCCCTACATATGCCCTCAACGCAGACCATAT  
CTGTGCCGAGTTGGGTAGGTCAGGTGCCCTAGCACCTTCCTCCCCTTTCAACCATGCGTCCACCCCG  
+  
FFFFFFFFFFFFFFFFFFFFFFFFFFFFFFFFFFFFFFFF,FFFFFFFF,FFFFFFFFFFFFFFFF  
FFFFFFFFFFFFFFFFFFFFFFFFFFFFFFFFFFFFFFFFFFFFFFFFFFFFFFFFFFFFFFFFFFFFFFFF  
@A00155:342:HHGFNDSXY:1:1220:18909:19053 1:N:0:GAACCTAG+TCCGCATA  
TACAGGGCTGCTGAAAAGTGGTCATAAAGCCGGTTTTGCCCTACATATGCCCTCAACGCAGACCATAT  
CTGTGCCGAGTTGGGTAGGTCAGGTGCCCTAGCACCTTCCTCCCCTTTCAACCATGCGTCCACCCCG  
+  
FFFFFFF:FFFFFFFFFFFFFFFFFFFFFFFFFFFFFFFF:FFFFFFFFFFFFFFFFFFFFFFFF:FF  
FFFFF:FFFFFFFFFFFFFFFFFFFFFFFF:FFFF:FF:FFFFFF:FFFFFFFF:FFFF:FFFF  
@A00155:342:HHGFNDSXY:1:2638:32380:17581 2:N:0:GAACCTAG+TCCGCATA  
ACAGGGCTGCTGAAAAGTGGTCATAAAGCCGGTTTTGCCCTACATATGCCCTCAACGCAGACCATATC  
TGTGCCGAGTTGGGTAGGTCAGGTGCCCTAGCACCTTCCTCCCCTTTCAACCATGCGTCCACCCCGGT  
+  
FF,FFFFFFFFFFFFFFFFFFFFFFFF:FFFFFFFF:FFFFFFFF:FFFFFFFF:FFFFFFFF:FFF  
FFFFFFFFFFFFFFFFFFFFFFFFFFFFFFFF:FFFFF:FFFFFFFFFFFFFFFFFFFFFFFFFFFFFFFF  
@A00155:342:HHGFNDSXY:1:2542:19831:9596 2:N:0:GAACCTAG+TCCGCATA  
ACAGGGCTGCTGAAAAGTGGTCATAAAGCCGGTTTTGCCCTACATATGCCCTCAACGCAGACCATATC  
TGTGCCGAGTTGGGTAGGTCAGGTGCCCTAGCACCTTCCTCCCCTTTCAACCATGCGTCCACCCCGGT  
+  
FFFFFFF:FFFFFFFFFFFF:FFFFFF:FFFF,FFFFFFFFFFFFFFFFFFFFFFFFFFFFFFFF:FFFF:  
FFFFFFFFFFFFFFFFFFFFFFFFFFFFFFFFFFFFFFFFFFFFFFFFFFFFFFFFFFFFFFFF,FFFFFFFF  
@A00155:342:HHGFNDSXY:1:1377:19334:10269 2:N:0:GAACCTAG+TCCGCATA  
AGGGCTGCTGAAAAGTGGTCATAAAGCCGGTTTTGCCCTACATATGCCCTCAACGCAGACCATATCTG  
TGCCGAGTTGGGTAGGTCAGGTGCCCTAGCACCTTCCTCCCCTTTCAACCATGCGTCCACCCCG  
+  
:FFFFFFFFFFFFFFFFFFFFFFFFFFFFFFFFFFFFFFFF,FFFFFFFF,FFFFFFFFFFFF::FF  
FFFFFFFFFFFFFFFFFFFFFFFF:FF:FFFFFFFFFFFFFFFFFFFFFFFF:FFFFFFFFFFFFFFFF  
@A00155:342:HHGFNDSXY:1:2578:3088:29731 2:N:0:GAACCTAG+TCCGCATA  
GGGCTGCTGAAAAGTGGTCATAAAGCCGGTTTTGCCCTACATATGCCCTCAACGCAGACCATATCTGT  
GCCGAGTTGGGTAGGTCAGGTGCCCTAGCACCTTCCTCCCCTTTCAACCATGCGTCCACCCCG  
+  
FFFFFFF:FFFFFFF:FFFFFFFFFFFF:FFFFFFFFFFFF,FFFFFFFFFFFFFFFFFFFFFFFF:FFF  
FFFFFFFFFFFFFFFFFFFFFFFFFFFFFFFFFFFFFFFFFFFFFFFFFFFFFFFFFFFFFFFF  
@A00155:342:HHGFNDSXY:1:1672:20844:26725 1:N:0:GAACCTAG+TCCGCATA  
GGGCTGCTGAAAAGTGGTCATAAAGCCGGTTTTGCCCTACATATGCCCTCAACGCAGACCATATCTGT  
GCCGAGTTGGGTAGGTCAGGTGCCCTAGCACCTTCCTCCCCTTTCAACCATGCGTCCACCCCGTTAA  
+  
FFFFFFFFFFFFFFFFFFFFFFFFFFFFFFFF:FFFFFFFF:FFFFFFFFFFFFFFFFFFFFFFFF:FFFFFFFF  
FFFFFFF:FFFFFFFFFFFFFFFFFFFFFFFFFFFFFFFFFFFFFFFFFFFFFFFFFFFFFFFF  
@A00155:342:HHGFNDSXY:1:2415:27317:34303 2:N:0:GAACCTAG+TCCGCATA  
GGCTGCTGAAAAGTGGTCATAAAGCCGGTTTTGCCCTACATATGCCCTCAACGCAGACCATATCTGTG

```
CCGAGTTGGGTAGGTCAGGTGCCCTAGCACCTTCCTCCCCTTTCAACCATGCGTCCACCCCGGTTAAT
+
FFFFFFFFFFFF:FFFFFFFFFFFFFFFFFFFFFFFFFFFFFFFFFFFFFFFFFFFFFFFFFFFFFFFFFFFFF:FFF:FFFFFF:FFFFFFFF:FFFFFFFF
FFFFFFFFFFFFFFFFFFFFFFFFFFFFFFFFFFFFFFFFFFFFFFFFFFFFFFFFFFFFFFFFFFFFFFFFFFFF:FFFFFFFFFFFFFFFFFFFFFFFF
@A00155:342:HHGFNDSXY:1:2461:17092:33567 1:N:0:GAACCTAG+TCCGCATA
CTGCTGAAAAC TGGTCATAAAGCCGGTTTTGCCCTACATATGCCCTCAACGCAGACCATATCTGTGCC
GAGTTGGGTAGGTCAGGTGCCCTAGCACCTTCCTCCCCTTTCAACCATGCGTCCACCCCGGTTAATTT
+
FFFFFFFFFFFFFFFFFFFFFFFFFFFFFFFFFFFFFFFFFFFFFFFFFFFFFFFFFFFFFFFFFFFFFFFFFFFF
FFFFFFFFFFFFFFFFFFFFFFFFFFFFFFFFFFFFFFFFFFFFFFFFFFFFFFFFFFFFFFFFFFFFFFFFFFFF:FFFFFFFFFFFFFFFFFFFFFFFF
@A00155:342:HHGFNDSXY:1:2163:3667:36338 1:N:0:GAACCTAG+TCCGCATA
CTGCTGAAAAC TGGTCATAAAGCCGGTTTTGCCCTACATATGCCCTCAACGCAGACCATATCTGTGCC
GAGTTGGGTAGGTCAGGTGCCCTAGCACCTTCCTCCCCTTTCAACCATGCGTCCACCCCGGTTAATTT
+
FFFFFFFFFFFFFFFFFFFFFFFFFFFFFFFFFFFFFFFFFFFFFFFFFFFFFFFFFFFFFFFFFFFFFFFFFFFF
FFFFFFFFFFFFFFFFFFFFFFFFFFFFFFFFFFFFFFFFFFFFFFFFFFFFFFFFFFFFFFFFFFFFFFFFFFFF:FFFFF:FFFFFFFFFFFFFFFFFFFF
@A00155:342:HHGFNDSXY:1:2430:23222:16188 1:N:0:GAACCTAG+TCCGCATA
CTGCTGAAAAC TGGTCATAAAGCCGGTTTTGCCCTACATATGCCCTCAACGCAGACCATATCTGTGCC
GAGTTGGGTAGGTCAGGTGCCCTAGCACCTTCCTCCCCTTTCAACCATGCGTCCACCCCGGTTAATTT
+
FFFFFFFFFFFFFFFFFFFFFFFFFFFFFFFFFFFFFFFFFFFFFFFFFFFFFFFFFFFFFFFFFFFFFFFFFFFF:F:FFFFFFFF
FFFFFFFFFFFFFFFFFFFFFFFFFFFFFFFFFFFFFFFFFFFFFFFFFFFFFFFFFFFFFFFFFFFFFFFFFFFF,FFFFFFFFFFFFFFFFFFFF
@A00155:342:HHGFNDSXY:1:2239:17381:8234 1:N:0:GAACCTAG+TCCGCATA
CTGCTGAAAAC TGGTCATAAAGCCGGTTTTGCCCTACATATGCCCTCAACGCAGACCATATCTGTGCC
GAGTTGGGTAGGTCAGGTGCCCTAGCACCTTCCTCCCCTTTCAACCATGCGTCCACCCCGGTTAATTT
+
FFFFFFFFFFFFFFFFFFFFFFFFFFFFFFFFFFFFFFFFFFFFFFFFFFFFFFFFFFFFFFFFFFFFFFFFFFFF
FFFFFFFFFFFFFFFFFFFFFFFFFFFFFFFFFFFFFFFFFFFFFFFFFFFFFFFFFFFFFFFFFFFFFFFFFFFF:FFFFFFFFFFFFFFFFFFFF
@A00155:342:HHGFNDSXY:1:1413:21007:11099 2:N:0:GAACCTAG+TCCGCATA
GCTGAAAAC TGGTCATAAAGCCGGTTTTGCCCTACATATGCCCTCAACGCAGACCATATCTGTGCCGA
GTTGGGTAGGTCAGGTGCCCTAGCACCTTCCTCCCCTTTCAACCATGCGTCCACCCCGGTTAATTTTG
+
FFF:F,FFF:FFF:FFF:FFF:FFF:FF,:FF:FF,FFFF,FFFF,, :FFFFFF,F:,FFF,FF:FF:
FF,FFFFFFFF:,F,FF,FFFF,FFF,FF:FF,F,FFFF,FF,FF:FFFFFFFF:,FFFFFF,FFF:
@A00155:342:HHGFNDSXY:1:2343:24975:9079 2:N:0:GAACCTAG+TCCGCATA
GCTGAAAAC TGGTCATAAAGCCGGTTTTGCCCTACATATGCCCTCAACGCAGACCATATCTGTGCCGA
GTTGGGTAGGTCAGGTGCCCTAGCACCTTCCTCCCCTTTCAACCATGCGTCCACCCCGGTTAATTTTG
+
FFFFFFFFFFFFFFF:FFFFFFFFFFFFFFF:FFF:FF:FFFFFFFFFFFFFFFFFFFFFFFFFFFFFFFFFFFF
FFFFFFFFFFFFFFFFFFFFFFFFFFFFFFFFFFFFFFFFFFFFFFFFFFFFFFFFFFFFFFFFFFFFFFFFFFFF
@A00155:342:HHGFNDSXY:1:2645:15465:36761 1:N:0:GAACCTAG+TCCGCATA
GCTGAAAAC TGGTCATAAAGCCGGTTTTGCCCTACATATGCCCTCAACGCAGACCATATCTGTGCCGA
GTTGGGTAGGTCAGGTGCCCTAGCACCTTCCTCCCCTTTCAACCATGCGTCCACCCCGGTTAATTTTG
+
FFFFFFFFFFFF:FFFFFFFFF:FFFFFFFFFFFFFFFFFFFF,FFFF:FFFFFFFFFFFFFFFFFFFFFFFFFFFF
FFFFFFFFFFFF:FFF:FFFFFFFFFFFFFFFFFFFFFFFFFFFFFFFFFFFFFFFFFFFFFFFFFFFFFFFF:F
@A00155:342:HHGFNDSXY:1:1303:22073:21684 1:N:0:GAACCTAG+TCCGCATA
GCTGAAAAC TGGTCATAAAGCCGGTTTTGCCCTACATATGCCCTCAACGCAGACCATATCTGTGCCGA
GTTGGGTAGGTCAGGTGCCCTAGCACCTTCCTCCCCTTTCAACCATGCGTCCACCCCGGTTAATTTTG
+
FFFFFFF:FFFFFFFFFFFFFFFFFFFFFFFFFFFFFFFFFFFFFFFFFFFFFFFFFFFFFFFFFFFFFFFFFFFF
FFFFFFFFFFFFFFFFFFFFFFFFFFFFFFFFFFFFFFFFFFFFFFFFFFFFFFFFFFFFFFFFFFFFFFFFFFFF:FFF
@A00155:342:HHGFNDSXY:1:1303:21305:6856 1:N:0:GAACCTAG+TCCGCATA
GCTGAAAAC TGGTCATAAAGCCGGTTTTGCCCTACATATGCCCTCAACGCAGACCATATCTGTGCCGA
```

GTTGGGTAGGTCAGGTGCCCTAGCACCTTCCTCCCCTTTCAACCATGCGTCCACCCCGGTTAATTTTG  
+  
FFFFFFFFFFFFFFFFFFFFFFFFFFFFFFFFFFFFFFFFFFFFFFFFFFFFFFFFFFFFFFFFFFFFFFFF  
FFFFFFFFFFFFFFFFFFFFFFFFFFFFFFFFFFFFFFFFFFFFFFFFFFFFFFFFFFFFFFFFFFFFFFFF  
@A00155:342:HHGFNDSXY:1:2378:12328:11569 1:N:0:GAACCTAG+TCCGCATA  
CTGAAAACTGGTCATAAAGCCGGTTTTGCCCTACATATGCCCTCAACGCAGACCATATCTGTGCCGAG  
TTGGGTAGGTCAGGTGCCCTAGCACCTTCCTCCCCTTTCAACCATGCGTCCACCCCGGTTAATTTTGA  
+  
FFFFFFFFFFFFFFFFFFFFFFFFFFFFFFFFFFFFFFFFFFFFFFFFFFFFFFFFFFFFFFFFFFFFFFFF  
FFFFFFFFFFFFFFFFFFFFFFFFFFFFFFFFFFFFFFFFFFFFFFFFFFFFFFFFFFFFFFFFFFFFFFFF  
@A00155:342:HHGFNDSXY:1:1602:5737:31563 2:N:0:GAACCTAG+TCCGCATA  
TGAAAACTGGTCATAAAGCCGGTTTTGCCCTACATATGCCCTCAACGCAGACCATATCTGTGCCGAGT  
TGGGTAGGTCAGGTGCCCTAGCACCTTCCTCCCCTTTCAACCATGCGTCCACCCCGGTTAATTTTGA  
+  
F:FFFFFFFFFFFFFF,FFFFFFFF:FFF:FFFFFF,,:FFF:FFFFFFFFFFFFFF:FFFFFFFFFFFFFF  
FFFFFFFFFFFFFFFFFFFFFF,FFFFFFFF:FFF:FFF:FFFFFFFFFFFFFF:FFFFFFFFFFFFFF:F  
@A00155:342:HHGFNDSXY:1:1632:11514:6370 2:N:0:GAACCTAG+TCCGCATA  
GAAAACTGGTCATAAAGCCGGTTTTGCCCTACATATGCCCTCAACGCAGACCATATCTGTGCCGAGTT  
GGGTAGGTCAGGTGCCCTAGCACCTTCCTCCCCTTTCAACCATGCGTCCACCCCGGTTAATTTTGACC  
+  
FFFFFFFFFFFFFFFFFFFFFFFFFFFFFFFFFFFFFFFFFFFFFFFFFFFFFFFFFFFFFFFFFFFFFFFF  
FFFFFFFFFFFFFFFFFFFFFFFFFFFFFFFFFFFFFFFFFFFFFFFFFFFFFFFFFFFFFFFFFFFFFFFF  
@A00155:342:HHGFNDSXY:1:2378:12328:11569 2:N:0:GAACCTAG+TCCGCATA  
AACTGGTCATAAAGCCGGTTTTGCCCTACATATGCCCTCAACGCAGACCATATCTGTGCCGAGTTGGG  
TAGGTCAGGTGCCCTAGCACCTTCCTCCCCTTTCAACCATGCGTCCACCCCGGTTAATTTTGACCCGT  
+  
FFFFFFFFFFFFFFFF, :FFFFFFFFFFFFFFFFFFFFFFFF,FFFFFFFFFFFFFFFFFFFFFF:FFFFFFF  
FFFFFFFFFFFFFFFFFFFFFF:FFFFFFFFFFFFFFFFFFFFFFFFFFFFFFFFFFFFFFFFFFFFFF:FFFFF  
@A00155:342:HHGFNDSXY:1:2414:12527:6809 1:N:0:GAACCTAG+TCCGCATA  
AACTGGTCATAAAGCCGGTTTTGCCCTACATATGCCCTCAACGCAGACCATATCTGTGCCGAGTTGGG  
TAGGTCAGGTGCCCTAGCACCTTCCTCCCCTTTCAACCATGCGTCCACCCCGGTTAATTTTGACCCGT  
+  
FFFFFFFFFFFFFFFFFFFFFFFFFFFFFFFFFFFFFF:F:FFFFFFFFFFFFFFFFFFFFFFFFFFFFFFFF  
FFFFFFFFFFFFFFFFFFFFFF,FFFFFFFFFFFFFFFFFFFFFFFFFFFFFFFFFFFFFFFFFFFFFFFF  
@A00155:342:HHGFNDSXY:1:1570:29017:30953 2:N:0:GAACCTAG+TCCGCATA  
ACTGGTCATAAAGCCGGTTTTGCCCTACATATGCCCTCAACGCAGACCATATCTGTGCCGAGTTGGGT  
AGGTCAGGTGCCCTAGCACCTTCCTCCCCTTTCAACCATGCGTCCACCCCGGTTAATTTTGACCCGTG  
+  
FFFFFFFFF:FFFFFFFFFFFFFFFFFFFFFFFFFFFFFFFFFFFFFF:FFFFFFFF:FFFFFFFFFFFFFFF  
FFFFFFFFFFFFFFFFFFFFFF,FFFFFFFFFFFFFFFFFFFFFFFFFFFFFFFFFFFFFFFFFFFFFFFF  
@A00155:342:HHGFNDSXY:1:1152:3766:9424 2:N:0:GAACCTAG+TCCGCATA  
TGGTCATAAAGCCGGTTTTGCCCTACATATGCCCTCAACGCAGACCATATCTGTGCCGAGTTGGGTAG  
GTCAGGTGCCCTAGCACCTTCCTCCCCTTTCAACCATGCGTCCACCCCGGTTAATTTTGACCCGTGAC  
+  
FFF:FFFFFFFFFFFFFFFFFFFFFFFFFFFFFFFF, F:FFFFFFFFFFFFFF,FFFFFFFFFFFFFFF  
FFFFFFFFFFFFFF,FFFFFFFFFFFFFFFFFFFFFF:FFFFFFFFFFFFFFFFFFFFFFFFFFFFFFF  
@A00155:342:HHGFNDSXY:1:2350:5602:21966 2:N:0:GAACCTAG+TCCGCATA  
TGGTCATAAAGCCGGTTTTGCCCTACATATGCCCTCAACGCAGACCATATCTGTGCCGAGTTGGGTAG  
GTCAGGTGCCCTAGCACCTTCCTCCCCTTTCAACCATGCGTCCACCCCGGTTAATTTTGACCCGTGAC  
+  
FF: :FFFF:FFFFFFFFFFFFFF:FFFFFFFFFFFFFFFFFFFFFFFFFFFFFF:FFFFFFFFFFFFFFF  
FFFFFFFFFFFFFFFFFFFFFF:F:FFFFFF:,FFF:F:FF:FFFFFFFFFFFFFFFFFFFFFF,FFFFFFFFFFFFFF  
@A00155:342:HHGFNDSXY:1:2431:25256:14231 2:N:0:GAACCTAG+TCCGCATA  
TGGTCATAAAGCCGGTTTTGCCCTACATATGCCCTCAACGCAGACCATATCTGTGCCGAGTTGGGTAG

GTCAGGTGCCCTAGCACCTTCCTCCCCTTTCAACCATGCGTCCACCCCGTTTAATTTTGACCCGTGAC  
+  
FF,FFFF::FFFFFFFFFFFFFFFF,FFFF:FFFFFFFFFFFF:,FFFFFF:FF:FFF:FFFFFFFF  
,FFF,FFFF,FFF,FFFFFFFF:F,FFFFFF,FFFF,F,F:FFFF,FFF:F:FFFFFFFF:F::F  
@A00155:342:HHGFNDSXY:1:2151:3477:25394 2:N:0:GAACCTAG+TCCGCATA  
TGGTCATAAAGCCGGTTTTGCCCTACATATGCCCTCAACGCAGACCATATCTGTGCCGAGTTGGGTAG  
GTCAGGTGCCCTAGCACCTTCCTCCCCTTTCAACCATGCGTCCACCCCGTTAATTTTGACCCGTGAC  
+  
FFFFFFFFFFFFFFFFFFFFFFFFFFFFFFFF:FFFFFF:FFFFFFFF:FFFFFFFFFFFFFFFFFFFFFF:FF  
FFFFFFFFFFFFFFFFFFFFFFFFFFFFFFFF:FFFFFFFFFFFFFFFFFFFFFFFFFFFFFFFFFFFFFFFF  
@A00155:342:HHGFNDSXY:1:2163:3667:36338 2:N:0:GAACCTAG+TCCGCATA  
GGTCATAAAGCCGGTTTTGCCCTACATATGCCCTCAACGCAGACCATATCTGTGCCGAGTTGGGTAGG  
TCAGGTGCCCTAGCACCTTCCTCCCCTTTCAACCATGCGTCCACCCCGTTAATTTTGACCCGTGACG  
+  
FFFFFFFFFFFF:FFFFFF:FFFFFFFFFFFF:FFFFFFFFFFFFFFFFFFFFFFFFFFFFFFFFFFFF  
FFFFFFFFFFFF:FFFFFFFFFFFF:FFFFFFFFFFFF:FFFFFFFFFFFFFFFFFFFFFFFFFFFFFFFF  
@A00155:342:HHGFNDSXY:1:2430:23222:16188 2:N:0:GAACCTAG+TCCGCATA  
GGTCATAAAGCCGGTTTTGCCCTACATATGCCCTCAACGCAGACCATATCTGTGCCGAGTTGGGTAGG  
TCAGGTGCCCTAGCACCTTCCTCCCCTTTCAACCATGCGTCCACCCCGTTAATTTTGACCCGTGACG  
+  
FFFFFFF:FFFFFFFFFFFFFFFFFFFF:FFFFFFFFFFFFFFFFFFFF:F:FFFFFFFFFFFFFFFFFFFF  
FFFFFFFFFFFFFFFFFFFF,FFFFFFFFFFFFFFFFFFFF:FFFFFFFFFFFFFFFFFFFFFFFFFFFFF  
@A00155:342:HHGFNDSXY:1:1565:22110:15546 1:N:0:GAACCTAG+TCCGCATA  
GTCATAAAGCCGGTTTTGCCCTACATATGCCCTCAACGCAGACCATATCTGTGCCGAGTTGGGTAGGT  
CAGGTGCCCTAGCACCTTCCTCCCCTTTCAACCATGCGTCCACCCCGTTAATTTTGACCCGTGACGG  
+  
FFFFFFFFFFFFFFFFFFFFFFFFFFFF:FFFFFFFFFFFFFFFFFFFF,FFFFFFFFFFFFFFFFFFFFF  
FFFFFFFFFFFFFFFFFFFFFFFFFFFFFFFFFFFFFFFFFFFFFFFFFFFFFFFFFFFFFFFFFFFFF  
@A00155:342:HHGFNDSXY:1:1565:22209:16157 1:N:0:GAACCTAG+TCCGCATA  
GTCATAAAGCCGGTTTTGCCCTACATATGCCCTCAACGCAGACCATATCTGTGCCGAGTTGGGTAGGT  
CAGGTGCCCTAGCACCTTCCTCCCCTTTCAACCATGCGTCCACCCCGTTAATTTTGACCCGTGACGG  
+  
FFFFFFFFFFFFFFFFFFFFFFFFFFFFFFFFFFFFFFFFFFFFFFFFFFFFFFFFFFFFFFFFFFFFF  
FFFFFFFFFFFFFFFFFFFF,FFFFFFFFFFFFFFFFFFFFFFFFFFFFFFFFFFFFFFFFFFFFFFFFFFFF  
@A00155:342:HHGFNDSXY:1:1473:13395:1799 1:N:0:GAACCTAG+TCCGCATA  
GTCATAAAGCCGGTTTTGCCCTACATATGCCCTCAACGCAGACCATATCTGTGCCGAGTTGGGTAGGT  
CAGGTGCCCTAGCACCTTCCTCCCCTTTCAACCATGCGTCCACCCCGTTAATTTTGACCCGTGACGG  
+  
FFFFFFFFFFFFFFFFFFFFFFFFFFFFFFFFFFFFFFFFFFFFFFFFFFFFFFFFFFFFFFFFFFFFF  
FFFFFFFFFFFFFFFFFFFFFFFFFFFFFFFFFFFFFFFFFFFFFFFFFFFFFFFFFFFFFFFFFFFF:F  
@A00155:342:HHGFNDSXY:1:1523:3278:10457 1:N:0:GAACCTAG+TCCGCATA  
GTCATAAAGCCGGTTTTGCCCTACATATGCCCTCAACGCAGACCATATCTGTGCCGAGTTGGGTAGGT  
CAGGTGCCCTAGCACCTTCCTCCCCTTTCAACCATGCGTCCACCCCGTTAATTTTGACCCGTGACGG  
+  
FFFFFFFFFFFFFFFFFFFFFFFFFFFFFFFFFFFFFFFFFFFF,FFFFFFFFFFFFFFFFFFFFFFFFFFFF  
FFFFFFFFFFFF:FFFFFFFFFFFF,FFFFFFFFFFFFFFFFFFFFFFFFFFFFFFFFFFFFFFFFFFFF  
@A00155:342:HHGFNDSXY:1:2615:32253:15107 1:N:0:GAACCTAG+TCCGCATA  
GTCATAAAGCCGGTTTTGCCCTACATATGCCCTCAACGCAGACCATATCTGTGCCGAGTTGGGTAGGT  
CAGGTGCCCTAGCACCTTCCTCCCCTTTCAACCATGCGTCCACCCCGTTAATTTTGACCCGTGACGG  
+  
FFFFFFFFFFFFFFFFFFFFFFFFFFFFFFFFFFFF:FFFFFFFFFFFFFFFFFFFFFFFFFFFFFFFFFFFF  
FFFFFFFFFFFFFFFFFFFF:FFFFFFFFFFFFFFFFFFFFFFFFFFFFFFFFFFFFFFFFFFFFFFFFFFFF  
@A00155:342:HHGFNDSXY:1:2112:18304:11052 1:N:0:GAACCTAG+TCCGCATA  
GTCATAAAGCCGGTTTTGCCCTACATATGCCCTCAACGCAGACCATATCTGTGCCGAGTTGGGTAGGT

CAGGTGCCCTAGCACCTTCCTCCCCTTTCAACCATGCGTCCACCCCGGTTAATTTTGACCCGTGACGG  
+  
FFFFFFFFFFFFFFFFFFFFFFFFFFFFFFFFFFFFFFFFFFFFFFFFFFFFFFFFFFFFFFFFFFFFFFFF  
FFFFFFFFFFFFFFFFFFFF:FF:FFFFFFFFFFFFFFFFFFFFFFFFFFFFFFFFFFFFFFFFFFFFFFFF  
@A00155:342:HHGFNDSXY:1:2112:18295:11068 1:N:0:GAACCTAG+TCCGCATA  
GTCATAAAGCCGGTTTTGCCCTACATATGCCCTCAACGCAGACCATATCTGTGCCGAGTTGGGTAGGT  
CAGGTGCCCTAGCACCTTCCTCCCCTTTCAACCATGCGTCCACCCCGGTTAATTTTGACCCGTGACGG  
+  
FFFFFFFFFFFFFFFFFFFFFFFFFFFFFFFFFFFFFFFFFFFFFFFFFFFFFFFFFFFFFFFFFFFFFFFF  
FFFFFFFFFFFFFFFFFFFF:FFFFFFFFFFFFFFFFFFFFFFFFFFFFFFFFFFFFFFFFFFFFFFFFFFFF  
@A00155:342:HHGFNDSXY:1:2644:4327:19539 1:N:0:GAACCTAG+TCCGCATA  
TCATAAAGCCGGTTTTGCCCTACATATGCCCTCAACGCAGACCATATCTGTGCCGAGTTGGGTAGGTC  
AGGTGCCCTAGCACCTTCCTCCCCTTTCAACCATGCGTCCACCCCGGTTAATTTTGACCCGTGACGGT  
+  
FFFFFFFFFFFFFFFFFFFFFFFFFFFFFFFFFFFF:FFFFFFFFFFFFFFFFFFFFFFFFFFFFFFFFFFFF  
FFFFFFFFFFFFFFFFFFFFFFFFFFFFFFFFFFFFFFFFFFFFFFFFFFFFFFFFFFFFFFFFFFFFFFFF  
@A00155:342:HHGFNDSXY:1:2333:6117:21010 1:N:0:GAACCTAG+TCCGCATA  
TCATAAAGCCGGTTTTGCCCTACATATGCCCTCAACGCAGACCATATCTGTGCCGAGTTGGGTAGGTC  
AGGTGCCCTAGCACCTTCCTCCCCTTTCAACCATGCGTCCACCCCGGTTAATTTTGACCCGTGACGGT  
+  
FFFFFFFFFFFFFFFFFFFFFFFFFFFFFFFFFFFF:FFFFFFFFFFFFFFFFFFFFFFFFFFFFFFFFFFFF  
FFFFFFFFFFFFFFFFFFFFFFFFFFFFFFFFFFFFFFFFFFFFFFFFFFFFFFFFFFFFFFFFFFFF:FFF:FFFF:FFFFFFFFFFFF  
@A00155:342:HHGFNDSXY:1:1634:23149:24674 2:N:0:GAACCTAG+TCCGCATA  
ATAAAGCCGGTTTTGCCCTACATATGCCCTCAACGCAGACCATATCTGTGCCGAGTTGGGTAGGTCAG  
GTGCCCTAGCACCTTCCTCCCCTTTCAACCATGCGTCCACCCCGGTTAATTTTGACCCGTGACGGTAA  
+  
:FFFFFFFF:FFFFFFFF,FFFFFFFFFFFFFF:FFFFFFFFFFFF,FFFFFFFFFFFFFFFFFFFFFFFFFFFF  
FFFFFFFFFFFFFFFFFFFFFFFFFFFFFFFFFFFF:FFFFFFFFFFFFFFFFFFFF:FFFFFFFFFFFFFFFFFFFFFFFFFFFF  
@A00155:342:HHGFNDSXY:1:1152:3766:9424 1:N:0:GAACCTAG+TCCGCATA  
TAAAGCCGGTTTTGCCCTACATATGCCCTCAACGCAGACCATATCTGTGCCGAGTTGGGTAGGTCAGG  
TGCCCTAGCACCTTCCTCCCCTTTCAACCATGCGTCCACCCCGGTTAATTTTGACCCGTGACGGTAAT  
+  
FFFFFFFFFFFFFFFFFFFFFFFFFFFFFFFFFFFF:FFFFFFFFFFFFFFFFFFFF,FFFFFFFF  
FFFFF,FF:FFF:FFFFFFFFFFFFFFFFFFFFFFFFFFFFFFFFFFFFFFFFFFFFFFFFFFFFFFFFFFFF  
@A00155:342:HHGFNDSXY:1:2151:3477:25394 1:N:0:GAACCTAG+TCCGCATA  
TAAAGCCGGTTTTGCCCTACATATGCCCTCAACGCAGACCATATCTGTGCCGAGTTGGGTAGGTCAGG  
TGCCCTAGCACCTTCCTCCCCTTTCAACCATGCGTCCACCCCGGTTAATTTTGACCCGTGACGGTAAT  
+  
FFFFFFFFF:FFFFFFFFFFFFFFFFFFFFFFFFFFFF:FFFFFFFFFFFFFFFFFFFFFFFFFFFFFFFFFFFF  
FFFFFFFFFFFF:FF,FFFFFFFFFFFFFFFFFFFFFFFFFFFFFFFFFFFF:FFFFFFFFFFFFFFFFFFFF:F:FFFFF:  
@A00155:342:HHGFNDSXY:1:2142:21685:15029 2:N:0:GAACCTAG+TCCGCATA  
AGCCGGTTTTGCCCTACATATGCCCTCAACGCAGACCATATCTGTGCCGAGTTGGGTAGGTCAGGTGC  
CCTAGCACCTTCCTCCCCTTTCAACCATGCGTCCACCCCGGTTAATTTTGACCCGTGACGGTAATACA  
+  
FFFFF:FFFFFFFFFFFF:FF:FF:FFFFFFFFFFFFFFFFFFFF:FFFFFFFFFFFFFFFFFFFFFFFFFFFF  
FFFFFFFFFFFFFFFFFFFFFFFFFFFFFFFFFFFF:FFFFFFFFF:FFFFFFFFFFFFFFFFFFFFFFFFFFFF  
@A00155:342:HHGFNDSXY:1:1220:18909:19053 2:N:0:GAACCTAG+TCCGCATA  
AGCCGGTTTTGCCCTACATATGCCCTCAACGCAGACCATATCTGTGCCGAGTTGGGTAGGTCAGGTGC  
CCTAGCACCTTCCTCCCCTTTCAACCATGCGTCCACCCCGGTTAATTTTGACCCGTGACGGTAATACA  
+  
FFFFFFFFFFFF:.:FFFFFFFFFFFFFFFFFFFFFFFFFFFFFFFFFFFF:FFFFF:FFFFFFFFFFFFFFFFFFFF  
FFFFFFFFFFFF:FFFFFFFFFFFFFFFFFFFF,FFF:FFFFF,FFFFFFFFF,FFFF:FFFFFFFFFFFFFFFF:FFFFF  
@A00155:342:HHGFNDSXY:1:2414:12527:6809 2:N:0:GAACCTAG+TCCGCATA  
GGTTTTGCCCTACATATGCCCTCAACGCAGACCATATCTGTGCCGAGTTGGGTAGGTCAGGTGCCCTA

GCACCTTCCTCCCCTTTCAACCATGCGTCCACCCCGGTTAATTTTGACCCGTGACGGTAATACAATAG  
+  
FFF,,FFFFFFFFFFFFFFFFFFFFFFFFFFFFFFFFFFFFFFFFFFFFFFFFFFFFFFFFFFFFFFFFFFFFFFFF  
FFFFFFFFFFFFFFFFFFFFFFFFFFFFFFFFFFFFFFFFFFFFFFFFFFFFFFFFFFFFFFFFFFFFFFFF:FFF  
@A00155:342:HHGFNDSXY:1:2447:1579:25927 2:N:0:GAACCTAG+TCCGCATA  
GGTTTTGCCCTACATATGCCCTCAACGCAGACCATATCTGTGCCGAGTTGGGTAGGTCAGGTGCCCTA  
GCACCTTCCTCCCCTTTCAACCATGCGTCCACCCCGGTTAATTTTGACCCGTGACGGTAATACAATAG  
+  
FFFFFFFFFFFFFFFFFFFFFFFFFFFFFFFFFFFFFFFFFFFFFFFFFFFFFFFFFFFFFFFFFFFFFFFF:FFFFFFFF  
FFFFFFFFFFFFFFFFFFFFFFFFFFFFFFFFFFFFFFFFFFFFFFFFFFFFFFFFFFFFFFFFFFFFFFFF:FFF  
@A00155:342:HHGFNDSXY:1:1131:1669:21668 2:N:0:GAACCTAG+TCCGCATA  
GGTTTTGCCCTACATATGCCCTCAACGCAGACCATATCTGTGCCGAGTTGGGTAGGTCAGGTGCCCTA  
GCACCTTCCTCCCCTTTCAACCATGCGTCCACCCCGGTTAATTTTGACCCGTGACGGTAATACAATAG  
+  
FF:FFFFFFFFFFFFFFFFFFFFFFFFFFFFFFFFFFFFFFFFFFFFFFFFFFFFFFFFFFFFFFFFFFFFFFFF  
FFFFFFFFFFFFFFFFFFFFFFFFFFFFFFFFFFFFFFFFFFFFFFFFFFFFFFFFFFFFFFFFFFFFFFFF:F:FFFFFFFF  
@A00155:342:HHGFNDSXY:1:2321:18276:33270 2:N:0:GAACCTAG+TCCGCATA  
TTGCCCTACATATGCCCTCAACGCAGACCATATCTGTGCCGAGTTGGGTAGGTCAGGTGCCCTAGCAC  
CTTCTCCCCTTTCAACCATGCGTCCACCCCGGTTAATTTTGACCCGTGACGGTAATACAATAGCTCG  
+  
FFFFFFFFFFFFFFFFFFFFFFFFFFFFFFFFFFFFFFFFFFFFFFFFFFFFFFFFFFFFFFFFFFFFFFFF,FFFFFFFF  
FFFFFFFFFFFFFFFFFFFFFFFFFFFFFFFFFFFFFFFFFFFFFFFFFFFFFFFFFFFFFFFFFFFFFFFFFFFFFFFF  
@A00155:342:HHGFNDSXY:1:1544:29206:26490 1:N:0:GAACCTAG+TCCGCATA  
GCCCTACATATGCCCTCAACGCAGACCATATCTGTGCCGAGTTGGGTAGGTCAGGTGCCCTAGCACCT  
TCTCCCCTTTCAACCATGCGTCCACCCCGGTTAATTTTGACCCGTGACGGTAATACAATAGCTCGGT  
+  
FFFFFFFFFFFFFFFFFFFFFFFFFFFFFFFFFFFFFFFFFFFFFFFFFFFFFFFFFFFFFFFFFFFFFFFFFFFF  
FFFFFFFFFFFFFFFFFFFFFFFFFFFFFFFFFFFFFFFFFFFFFFFFFFFFFFFFFFFFFFFFFFFFFFFFFFFF  
@A00155:342:HHGFNDSXY:1:2554:16288:31485 2:N:0:GAACCTAG+TCCGCATA  
TACATATGCCCTCAACACAGACCATATCTGTGCCGAGTTGGGTAGGTCAGGTGCCCTAGCACCTTCCT  
CCCCTTTCAACCATGCGTCCACCCCGGTTAATTTTGACCCGTGACGGTAATACAATAGCTCGGTAAGC  
+  
FFF:F:FFFF,FF,FFFFFFFF:FFFFFFFFFFFFFFFFFFFFFFFFFFFFFFFFFFFFFFFFFFFFFFFF  
FFFFFFFFFFFFFFFF:FFFFFFFFFFFFFFFFFFFFFFFFFFFFFFFFFFFFFFFFFFFFFFFF:FFFFFFFF  
@A00155:342:HHGFNDSXY:1:2523:12816:19179 2:N:0:GAACCTAG+TCCGCATA  
ACATATGCCCTCAACGCAGACCATATCTGTGCCGAGTTGGGTAGGTCAGGTGCCCTAGCACCTTCCTC  
CCCTTTCAACCATGCGTCCACCCCGGTTAATTTTGACCCGTGACGGTAATACAATAGCTCGGTAAGCT  
+  
FFFFFFFFFFFFFFFFFFFFFFFFFFFFFFFFFFFFFFFFFFFFFFFFFFFFFFFFFFFFFFFFFFFFFFFFFFFF  
FFFFFFFFFFFFFFFFFFFFFFFFFFFFFFFFFFFFFFFFFFFFFFFFFFFFFFFFFFFFFFFFFFFFFFFF:F:F  
@A00155:342:HHGFNDSXY:1:1628:10972:28980 2:N:0:GAACCTAG+TCCGCATA  
ACATATGCCCTCAACGCAGACCATATCTGTGCCGAGTTGGGTAGGTCAGGTGCCCTAGCACCTTCCTC  
CCCTTTCAACCATGCGTCCACCCCGGTTAATTTTGACCCGTGACGGTAATACAATAGCTCGGTAAGCT  
+  
FFFFFFFFFFFFFFFFFFFFFFFFFFFFFFFFFFFFFFFFFFFFFFFFFFFFFFFFFFFFFFFFFFFFFFFFFFFF  
FFFFFFFFFFFFFFFFFFFFFFFFFFFFFFFFFFFFFFFFFFFFFFFFFFFFFFFFFFFFFFFFFFFFFFFFFFFF  
@A00155:342:HHGFNDSXY:1:2471:13367:10019 2:N:0:GAACCTAG+TCCGCATA  
ACATATGCCCTCAACGCAGACCATATCTGTGCCGAGTTGGGTAGGTCAGGTGCCCTAGCACCTTCCTC  
CCCTTTCAACCATGCGTCCACCCCGGTTAATTTTGACCCGTGACGGTAATACAATAGCTCGGTAAGCT  
+  
FFFF: :FFFFFFFFFFFFFFFFFFFFFFFFFFFFFFFFFFFFFFFFFFFFFFFFFFFFFFFFFFFFFFFF  
FFFFFFFFFFFFFFFFFFFFFFFFFFFFFFFFFFFFFFFFFFFFFFFFFFFFFFFFFFFFFFFFFFFFFFFF:FFFF:FFFF  
@A00155:342:HHGFNDSXY:1:1516:5168:26913 2:N:0:GAACCTAG+TCCGCATA  
ACATATGCCCTCAACGCAGACCATATCTGTGCCGAGTTGGGTAGGTCAGGTGCCCTAGCACCTTCCTC

CCCTTTCAACCATGCGTCCACCCCGGTTAATTTTGACCCGTGACGGTAATACAATAGCTCGGTAAGCT  
+  
FFFFFFFFFFFFFF:FFFFFFFFFFFFFF,FFFFFFFF:FFFFFFFFFFFFFF,FFFFFFFF:FF:FFF  
FFFFFFFFFFFFFF:FFFFFFFFFFFFFF:FFFFFFFFFFFFFF:FFFFFFFFFFFFFF:FFF:FFFFF  
@A00155:342:HHGFNDSXY:1:2333:6117:21010 2:N:0:GAACCTAG+TCCGCATA  
ACATATGCCCTCAACGCAGACCATATCTGTGCCGAGTTGGGTAGGTCAGGTGCCCTAGCACCTTCCTC  
CCCTTTCAACCATGCGTCCACCCCGGTTAATTTTGACCCGTGACGGTAATACAATAGCTCGGTAAGCT  
+  
FF,FFFFFFFFFFFFFFFFF::FFFFFFFFFFFFFFFFF::FFFFFFFF:FFFF:FFFFFFFFFFFF,  
FFF:FFFFFF:FF:FFFFFFFFFFFFFFFFFFFFFFFFFFFFFFFFFFFFFFFF:FFFFFFFFFFFFF  
@A00155:342:HHGFNDSXY:1:1628:10890:28933 2:N:0:GAACCTAG+TCCGCATA  
ACATATGCCCTCAACGCAGACCATATCTGTGCCGAGTTGGGTAGGTCAGGTGCCCTAGCACCTTCCTC  
CCCTTTCAACCATGCGTCCACCCCGGTTAATTTTGACCCGTGACGGTAATACAATAGCTCGGTAAGCT  
+  
FFFFFFFFF:FFFFFFFFFFFFFFFFF:FFFFFFFF::FFFFFFFFFFFFFFFFFFFF,FFFF  
FFFFFFFF,FFFFFFFFFFFFFFFFF::FFFFFFFFFFFFFFFFFFFF,FFFFFFFFFFFFF  
@A00155:342:HHGFNDSXY:1:1507:32072:31641 2:N:0:GAACCTAG+TCCGCATA  
ACATATGCCCTCAACGCAGACCATATCTGTGCCGAGTTGGGTAGGTCAGGTGCCCTAGCACCTTCCTC  
CCCTTTCAACCATGCGTCCACCCCGGTTAATTTTGACCCGTGACGGTAATACAATAGCTCGGTAAGCT  
+  
FFFFFFFFFFFF,FFFFFFFFFFFFFFFFF:FFFFFFFFFFFFFFFFF:FFFFFFFFFFFF  
FFFFFF,FFF:FFFFFF,FFFFFFFFF:FFFFFFFFFFFFFFFFFFFFFFFFFFFFFFFFFFFFF  
@A00155:342:HHGFNDSXY:1:2253:15917:27524 2:N:0:GAACCTAG+TCCGCATA  
ACATATGCCCTCAACGCAGACCATATCTGTGCCGAGTTGGGTAGGTCAGGTGCCCTAGCACCTTCCTC  
CCCTTTCAACCATGCGTCCACCCCGGTTAATTTTGACCCGTGACGGTAATACAATAGCTCGGTAAGCT  
+  
FFFFFFFFFFFFFFFFFFFFFFFFFFFFFFFFFFFFFFFFFFFFFFFFFFFFFFFFFFFFFFFFFFFFF  
FFFFFFFFFFFFFFFFFFFFFFFFFFFFFFFFFFFFFFFFFFFFFFFFFFFFFFFFFFFFFFFFFFFFF  
@A00155:342:HHGFNDSXY:1:1644:21206:16485 2:N:0:GAACCTAG+TCCGCATA  
ACATATGCCCTCAACGCAGACCATATCTGTGCCGAGTTGGGTAGGTCAGGTGCCCTAGCACCTTCCTC  
CCCTTTCAACCATGCGTCCACCCCGGTTAATTTTGACCCGTGACGGTAATACAATAGCTCGGTAAGCT  
+  
FFF:FFFFFFFF:FFFFFFFFFFFFFFFFFFFFFFFFFFFFFFFFFFFFFFFFFFFFFFFFFFFFF:FFF  
FFFFFFFF:FFFFFFFFFFFFFFFFFFFFFFFFFFFFFFFFFFFFFFFFFFFFFFFFFFFFFFFFFFFF,FFFF  
@A00155:342:HHGFNDSXY:1:2643:8829:28244 2:N:0:GAACCTAG+TCCGCATA  
ACATATGCCCTCAACGCAGACCATATCTGTGCCGAGTTGGGTAGGTCAGGTGCCCTAGCACCTTCCTC  
CCCTTTCAACCATGCGTCCACCCCGGTTAATTTTGACCCGTGACGGTAATACAATAGCTCGGTAAGCT  
+  
FFF:FFFFFFFFFFFFFFFFF:FFFFFFFFFFFFFFFFFFFFFFFFFFFFFFFFFFFFFFFFFFFFFFFFF  
FFFFFFFFFFFFFFFFFFFFFFFFFFFFFFFFFFFFFFFFFFFFFFFFFFFFFFFFFFFFFFFFFFFFF  
@A00155:342:HHGFNDSXY:1:1607:1389:31673 2:N:0:GAACCTAG+TCCGCATA  
ACATATGCCCTCAACGCAGACCATATCTGTGCCGAGTTGGGTAGGTCAGGTGCCCTAGCACCTTCCTC  
CCCTTTCAACCATGCGTCCACCCCGGTTAATTTTGACCCGTGACGGTAATACAATAGCTCGGTAAGCT  
+  
FFFFFFFFFFFFFFFFFFFF::FFFFFFFF:FFFFFFF::F,F:FFFFFFFF::FF:FFFF:FF::FF:  
::FFFFFFFF:FFFF:F:FFFFFFFFFFFFF,,FF,,FFFFFFFFF,FFFF:,FFFF,,FFFF:F:  
@A00155:342:HHGFNDSXY:1:1224:31033:24768 2:N:0:GAACCTAG+TCCGCATA  
GCATATGCCCTCAACGCAGACCATATCTGTGCCGAGTTGGGTAGGTCAGGTGCCCTAGCACCTTCCTC  
CCCTTTCAACCATGCGTCCACCCCGGTTAATTTTGACCCGTGACGGTAATACAATAGCTCGGTAAGCT  
+  
FFFFFFFFFFFFFFF:FFFFFFFFFFFFFFFFFFFFFFFFFFFFFFFFFFFFFFFFFFFFFFFFFFFFF  
FFFFFFFFFFFF:FFFFFFFFFFFFFFFFFFFFFFFFF:FFFFFFFFFFFFFFFFF:FFFFFFFFFFFFF  
@A00155:342:HHGFNDSXY:1:1578:4264:33708 1:N:0:GAACCTAG+TCCGCATA  
CATATGCCCTCAACGCAGACCATATCTGTGCCGAGTTGGGTAGGTCAGGTGCCCTAGCACCTTCCTCC



CCTTTCAACCATGCGTCCACCCCGGTTAATTTTGACCCGTGACGGTAATACAATAGCTCGGTAAGCTT  
+  
FFFFFFFFFFFFFFFFFFFFFFFF:FFFF:FFFFFFFFFFFFFFFFFFFFFFFF,FFFFFFFFFFFFFFFFFFFF  
FFFFFFFF:FFFFFFFFFFFFFFFFFFFFFFFFFFFFFFFFFFFFFFFFFFFFFFFFFFFFFFFFFFFFFFFF  
@A00155:342:HHGFNDSXY:1:2566:7392:35493 1:N:0:GAACCTAG+TCCGCATA  
CATATGCCCTCAACGCAGACCATATCTGTGCCGAGTTGGGTAGGTCAGGTGCCCTAGCACCTTCCTCC  
CCTTTCAACCATGCGTCCACCCCGGTTAATTTTGACCCGTGACGGTAATACAATAGCTCGGTAAGCTT  
+  
FFFFFFFFFFFFFFFFFFFFFFFFFFFFFFFFFFFFFFFFFFFFFFFFFFFFFFFFFFFFFFFFFFFFFFFF,FFFFFFFFFFFFFFFF  
FFFFFFFFFFFFFFFFFFFFFFFFFFFFFFFF:FFFF,FFFFFFFFFFFFFFFFFFFFFFFFFFFFFFFF:FFFFFFFFFFFF  
@A00155:342:HHGFNDSXY:1:2308:28266:12524 1:N:0:GAACCTAG+TCCGCATA  
CATATGCCCTCAACGCAGACCATATCTGTGCCGAGTTGGGTAGGTCAGGTGCCCTAGCACCTTCCTCC  
CCTTTCAACCATGCGTCCACCCCGGTTAATTTTGACCCGTGACGGTAATACAATAGCTCGGTAAGCTT  
+  
FFFFFFFFFFFFFFFFFFFFFFFFFFFFFFFFFFFFFFFFFFFFFFFFFFFFFFFFFFFFFFFFFFFFFFFF:FFFFFFFFFFFFFFFFFFFF  
FFFFFFFFFFFFFFFFFFFFFFFFFFFFFFFFFFFFFFFFFFFFFFFFFFFFFFFFFFFFFFFFFFFFFFFF,FFFFFFFFFFFFFFFFFFFF  
@A00155:342:HHGFNDSXY:1:2321:18276:33270 1:N:0:GAACCTAG+TCCGCATA  
CATATGCCCTCAACGCAGACCATATCTGTGCCGAGTTGGGTAGGTCAGGTGCCCTAGCACCTTCCTCC  
CCTTTCAACCATGCGTCCACCCCGGTTAATTTTGACCCGTGACGGTAATACAATAGCTCGGTAAGCTT  
+  
FFFFFFFFFFFFFFFFFFFFFFFFFFFFFFFFFFFFFFFFFFFFFFFFFFFFFFFFFFFFFFFFFFFFFFFFFFFF  
FFFFFFFFFFFFFFFFFFFFFFFFFFFFFFFFFFFFFFFFFFFFFFFFFFFFFFFFFFFFFFFFFFFFFFFF:FFFF  
@A00155:342:HHGFNDSXY:1:1172:11388:3646 2:N:0:GAACCTAG+TCCGCATA  
CATATGCCCTCAACGCAGACCATATCTGTGCCGAGTTGGGTAGGTCAGGTGCCCTAGCACCTTCCTCC  
CCTTTCAACCATGCGTCCACCCCGGTTAATTTTGACCCGTGACGGTAATACAATAGCTCGGTAAGCTT  
+  
FFFFFFFFFFFFFFFFFFFFFFFFFFFFFFFFFFFFFFFFFFFFFFFFFFFFFFFFFFFFFFFFFFFFFFFFFFFF  
FFFFFFFFFFFFFFFFFFFFFFFFFFFFFFFFFFFFFFFFFFFFFFFFFFFFFFFFFFFFFFFFFFFFFFFF:F:FFFFFFFFFFFF  
@A00155:342:HHGFNDSXY:1:2446:20871:22388 1:N:0:GAACCTAG+TCCGCATA  
CATATGCCCTCAACGCAGACCATATCTGTGCCGAGTTGGGTAGGTCAGGTGCCCTAGCACCTTCCTCC  
CCTTTCAACCATGCGTCCACCCCGGTTAATTTTGACCCGTGACGGTAATACAATAGCTCGGTAAGCTT  
+  
FF,FFFFFFFFFFFFFFFFFFFFFFFFFFFFFFFFFFFFFFFFFFFFFFFFFFFFFFFFFFFFFFFFFFFFFFFFFFFF  
FFFFFFF:FFFFFFFFFFFFFFFFFFFFFFFFFFFFFFFFFFFFFFFFFFFFFFFFFFFFFFFFFFFFFFFFFFFF  
@A00155:342:HHGFNDSXY:1:1339:12093:12759 1:N:0:GAACCTAG+TCCGCATA  
CATATGCCCTCAACGCAGACCATATCTGTGCCGAGTTGGGTAGGTCAGGTGCCCTAGCACCTTCCTCC  
CCTTTCAACCATGCGTCCACCCCGGTTAATTTTGACCCGTGACGGTAATACAATAGCTCGGTAAGCTT  
+  
FFFFFFFFFFFFFFFFFFFFFFFFFFFFFFFFFFFFFFFFFFFFFFFFFFFFFFFFFFFFFFFFFFFFFFFF: :FFFFF  
FFFFFFFFFFFFFFFFFFFFFFFFFFFFFFFFFFFFFFFFFFFFFFFFFFFFFFFFFFFFFFFFFFFFFFFF: :FFFFFFFFFFFFFFFFFFFF  
@A00155:342:HHGFNDSXY:1:1132:25165:13009 1:N:0:GAACCTAG+TCCGCATA  
CATATGCCCTCAACGCAGACCATATCTGTGCCGAGTTGGGTAGGTCAGGTGCCCTAGCACCTTCCTCC  
CCTTTCAACCATGCGTCCACCCCGGTTAATTTTGACCCGTGACGGTAATACAATAGCTCGGTAAGCTT  
+  
FFFFFFFFFFFFFFFFFFFFFFFFFFFFFFFFFFFFFFFFFFFFFFFFFFFFFFFFFFFFFFFFFFFFFFFFFFFF  
FFFFFFF:FFFFFFFFFFFFFFFFFFFFFFFFFFFFFFFFFFFFFFFFFFFFFFFFFFFFFFFFFFFFFFFFFFFF,FFF:F  
@A00155:342:HHGFNDSXY:1:2226:14841:17206 1:N:0:GAACCTAG+TCCGCATA  
CATATGCCCTCAACGCAGACCATATCTGTGCCGAGTTGGGTAGGTCAGGTGCCCTAGCACCTTCCTCC  
CCTTTCAACCATGCGTCCACCCCGGTTAATTTTGACCCGTGACGGTAATACAATAGCTCGGTAAGCTT  
+  
FFFFFFFFFFFFFFFFFFFFFFFFFFFFFFFFFFFFFFFFFFFFFFFFFFFFFFFFFFFFFFFFFFFFFFFFFFFF  
FFFFFFFFFFFFFFFFFFFFFFFFFFFFFFFFFFFFFFFFFFFFFFFFFFFFFFFFFFFFFFFFFFFFFFFFFFFF  
@A00155:342:HHGFNDSXY:1:2378:30978:22075 2:N:0:GAACCTAG+TCCGCATA  
ATATGCCCTCAACGCAGACCATATCTGTGCCGAGTTGGGTAGGTCAGGTGCCCTAGCACCTTCCTCCC

CTTTCAACCATGCGTCCACCCCGGTTAATTTTGACCCGTGACGGTAATACAATAGCTCGGTAAGCTT  
+  
FFFFFFFFFFFF:F:F,F,FFFFFFFF:FFFFFFFF,FFF,FFFF:FF:FFFFFFFFFFFFF:  
FFFFFFFF::FFFFFFFF:F:FFFF,FFFFFFFFFFFFFFFFFFFFFFFFFFFFFFFF:FFFFFFF  
@A00155:342:HHGFNDSXY:1:1165:29776:15013 2:N:0:GAACCTAG+TCCGCATA  
TATGCCCTCAACGCAGACCATATCTGTGCCGAGTTGGGTAGGTCAGGTGCCCTAGCACCTTCCTCCCC  
TTTCAACCATGCGTCCACCCCGGTTAATTTTGACCCGTGACGGTAATACAATAGCTCGGTAAGCTTGG  
+  
F:FFFFFFFFFFFF:FFF,FFFFFFFF,FFFFFFFFFFFFFFFFFFFFFFFF,FFFFFFFFFFFFFFFF  
FFFFFFFFFFFF:F:F,FFFFFFFFFFFFFFFFFFFFFFFFFFFFFFFFFFFFFFFFFFFFFFFF  
@A00155:342:HHGFNDSXY:1:2373:4616:10113 2:N:0:GAACCTAG+TCCGCATA  
ATGCCCTCAACGCAGACCATATCTGTGCCGAGTTGGGTAGGTCAGGTGCCCTAGCACCTTCCTCCCCT  
TTCAACCATGCGTCCACCCCGGTTAATTTTGACCCGTGACGGTAATACAATAGCTCGGTAAGCTTGGG  
+  
FFFFFFFF,FFFFFFFF:FFFFFFFF:FFFFFFFFFFFFFFFFFFFFFFFFFFFFFFFFFFFFFFFF:F  
FFFFFFFFFFFFFFFFFFFFFFFFFFFFFFFFFFFFFFFFFFFFFFFFFFFFFFFFFFFFFFFFFFFFF  
@A00155:342:HHGFNDSXY:1:1118:1497:26256 2:N:0:GAACCTAG+TCCGCATA  
ATGCCCTCAACGCAGACCATATCTGTGCCGAGTTGGGTAGGTCAGGTGCCCTAGCACCTTCCTCCCCT  
TTCAACCATGCGTCCACCCCGGTTAATTTTGACCCGTGACGGTAATACAATAGCTCGGTAAGCTTGGG  
+  
FFFF:F,FFFF,FFFFFFFF:F,FFFF, :FF:F:FFF:FFF:FF:FFFFFFFF,FFF  
FFFFFFFF:F:FFFF:, ,FFFF, F:FF:FFFF,FFFFFFFFFFFFFFFFFFFFFFFF::  
@A00155:342:HHGFNDSXY:1:1632:32560:11882 2:N:0:GAACCTAG+TCCGCATA  
ATGCCCTCAACGCAGACCATATCTGTGCCGAGTTGGGTAGGTCAGGTGCCCTAGCACCTTCCTCCCCT  
TTCAACCATGCGTCCACCCCGGTTAATTTTGACCCGTGACGGTAATACAATAGCTCGGTAAGCTTGGG  
+  
FFFFFFFF,FFFFFFFF::FFFFFFFF:FF:FFFFFFFFFFFFFFFF: :FFFFFFFFFFFFF:  
FFF:FFF,FFFFFF:FFFFFFFF,FFF,F,FFFFFFFFFFFF:FFF:,FFFFFFFFFFFFF  
@A00155:342:HHGFNDSXY:1:2348:13494:20917 2:N:0:GAACCTAG+TCCGCATA  
ATGCCCTCAACGCAGACCATATCTGTGCCGAGTTGGGTAGGTCAGGTGCCCTAGCACCTTCCTCCCCT  
TTCAACCATGCGTCCACCCCGGTTAATTTTGACCCGTGACGGTAATACAATAGCTCGGTAAGCTTGGG  
+  
FFFFFFFFFFFFFFFF:FF,FFFFFFFFFFFF,FFFF,, :FFFFFFFFFFFF:FFF::FFFF  
FFF,FFFFFFFF:F:FF:, ,F:FFFFFFFFFFFFFFFFFFFFFFFFFFFFFFFF:FFFFFFFFFFFF  
@A00155:342:HHGFNDSXY:1:1467:19018:15734 2:N:0:GAACCTAG+TCCGCATA  
ATGCCCTCAACGCAGACCATATCTGTGCCGAGTTGGGTAGGTCAGGTGCCCTAGCACCTTCCTCCCCT  
TTCAACCATGCGTCCACCCCGGTTAATTTTGACCCGTGACGGTAATACAATAGCTCGGTAAGCTTGGG  
+  
FFFFFFFFFFFFFFFFFFFFFFFFFFFFFFFFFFFFFFFFFFFFFFFFFFFFFFFFFFFFFFFF:FFFFFFF  
FFFFFFFF,FFFFFFFFFFFFFFFFFFFFFFFFFFFFFFFFFFFFFFFFFFFFFFFFFFFFFFFF:FFF  
@A00155:342:HHGFNDSXY:1:2568:3775:2738 2:N:0:GAACCTAG+TCCGCATA  
CTCAACGCAGACCATATCTGTGCCGAGTTGGGTAGGTCAGGTGCCCTAGCACCTTCCTCCCCTTTCAA  
CCATGCGTCCACCCCGGTTAATTTTGACCCGTGACGGTAATACAATAGCTCGGTAAGCTTGGGTGAGT  
+  
FFFF,FFFF:FFFFFFFFFFFFFFFFFFFFFFFFFFFFFFFFFFFFFFFFFFFFFFFFFFFFFFFF  
FFFFFFFFFFFFFFFFFFFFFFFF:FFFFFFFF:FFFFFFFF:FFFF:FFFFFFFFFFFFF  
@A00155:342:HHGFNDSXY:1:2462:6189:23453 1:N:0:GAACCTAG+TCCGCATA  
CTCAACGCAGACCATATCTGTGCCGAGTTGGGTAGGTCAGGTGCCCTAGCACCTTCCTCCCCTTTCAA  
CCATGCGTCCACCCCGGTTAATTTTGACCCGTGACGGTAATACAATAGCTCGGTAAGCTTGGGTGAGT  
+  
FFFFFFFFFFFFFFFFFFFFFFFFFFFFFFFFFFFFFFFFFFFFFFFFFFFFFFFFFFFFFFFFFFFF  
FFFFFFFFFFFFFFFFFFFFFFFFFFFFFFFFFFFFFFFF:FFFFFFFFFFFFFFFF:FFFFFFFFF  
@A00155:342:HHGFNDSXY:1:1617:7301:18803 1:N:0:GAACCTAG+TCCGCATA  
TCAACGCAGACCATATCTGTGCCGAGTTGGGTAGGTCAGGTGCCCTAGCACCTTCCTCCCCTTTCAAC

CATGCGTCCACCCCGGTTAATTTTGACCCGTGACGGTAATACAATAGCTCGGTAAGCTTGGGTGAGTC  
+  
FFFFFFFFFFFFFFFFFFFFFFFFFFFFFFFFFFFFFFFFFFFFFFFFFFFFFFFFFFFFFFFFFFFFFFFF  
FFFFFFFFFFFFFFFFFFFFFFFFFFFFFFFFFFFFFFFFFFFFFFFFFFFFFFFFFFFFFFFFFFFFFFFF  
@A00155:342:HHGFNDSXY:1:1224:31033:24768 1:N:0:GAACCTAG+TCCGCATA  
TCAACGCAGACCATATCTGTGCCGAGTTGGGTAGGTCAGGTGCCCTAGCACCTTCCTCCCCTTTCAAC  
CATGCGTCCACCCCGGTTAATTTTGACCCGTGACGGTAATACAATAGCTCGGTAAGCTTGGGTGAGTC  
+  
FFFFFFFFFFFFFFFFFFFFFFFFFFFFFFFFFFFFFFFFFFFFFFFFFFFFFFFFFFFFFFFFFFFFFFFF  
FFFFFFFFFFFFFFFFFFFFFFFFFFFFFFFFFFFFFFFFFFFFFFFFFFFFFFFFFFFFFFFFFFFFFFFF  
@A00155:342:HHGFNDSXY:1:1343:10502:35305 1:N:0:GAACCTAG+TCCGCATA  
TCAACGCAGACCATATCTGTGCCGAGTTGGGTAGGTCAGGTGCCCTAGCACCTTCCTCCCCTTTCAAC  
CATGCGTCCACCCCGGTTAATTTTGACCCGTGACGGTAATACAATAGCTCGGTAAGCTTGGGTGAGTC  
+  
FFFFFFFFFFFFFFFFFFFFFFFFFFFFFFFFFFFFFFFFFFFFFFFFFFFFFFFFFFFFFFFFFFFFFFFF  
FFFFFFFFFFFFFFFFFFFFFFFFFFFFFFFFFFFFFFFFFFFFFFFFFFFFFFFFFFFFFFFFFFFFFFFF  
@A00155:342:HHGFNDSXY:1:2373:4616:10113 1:N:0:GAACCTAG+TCCGCATA  
TCAACGCAGACCATATCTGTGCCGAGTTGGGTAGGTCAGGTGCCCTAGCACCTTCCTCCCCTTTCAAC  
CATGCGTCCACCCCGGTTAATTTTGACCCGTGACGGTAATACAATAGCTCGGTAAGCTTGGGTGAGTC  
+  
FFFFFFFFFFFFFFFFFFFFFFFFFFFFFFFFFFFFFFFFFFFFFFFFFFFFFFFFFFFFFFFFFFFFFFFF  
FFFFFFFFFFFFFFFFFFFFFFFFFFFFFFFFFFFFFFFFFFFFFFFFFFFFFFFFFFFFFFFFFFFFFFFF  
@A00155:342:HHGFNDSXY:1:1114:3513:11490 1:N:0:GAACCTAG+TCCGCATA  
TCAACGCAGACCATATCTGTGCCGAGTTGGGTAGGTCAGGTGCCCTAGCACCTTCCTCCCCTTTCAAC  
CATGCGTCCACCCCGGTTAATTTTGACCCGTGACGGTAATACAATAGCTCGGTAAGCTTGGGTGAGTC  
+  
FFFFF:FFFFFFFFFFFFFFFF:F,FFFFFFFFFFFF:FF,,FF,FFFFF,:F,,:F:F::FFFFFFFFF  
:FFFFF,FFFFFFFFFFFFFFFFFFFFFFFFFFFFFFFFFFFFFFFFFFFFFFFFFFFFFFFFFFFFFFFF  
@A00155:342:HHGFNDSXY:1:2554:16288:31485 1:N:0:GAACCTAG+TCCGCATA  
TCAACACAGACCATATCTGTGCCGAGTTGGGTAGGTCAGGTGCCCTAGCACCTTCCTCCCCTTTCAAC  
CATGCGTCCACCCCGGTTAATTTTGACCCGTGACGGTAATACAATAGCTCGGTAAGCTTGGGTGAGTC  
+  
FFFFFFFFFFFFFFFFFFFFFFFFFFFFFFFFFFFFFFFFFFFFFFFFFFFFFFFFFFFFFFFFFFFFFFFF  
FFFFFFFFFFFFFFFFFFFFFFFFFFFFFFFFFFFFFFFFFFFFFFFFFFFFFFFFFFFFFFFFFFFFFFFF  
@A00155:342:HHGFNDSXY:1:1214:4309:27211 1:N:0:GAACCTAG+TCCGCATA  
TCAACGCAGACCATATCTGTGCCGAGTTGGGTAGGTCAGGTGCCCTAGCACCTTCCTCCCCTTTCAAC  
CATGCGTCCACCCCGGTTAATTTTGACCCGTGACGGTAATACAATAGCTCGGTAAGCTTGGGTGAGTC  
+  
FFFFFFFFFFFFFFFFFFFFFFFFFFFFFFFFFFFFFFFFFFFFFFFFFFFFFFFFFFFFFFFFFFFFFFFF  
FFFFFFFFFFFFFFFFFFFFFFFFFFFFFFFFFFFFFFFFFFFFFFFFFFFFFFFFFFFFFFFFFFFFFFFF  
@A00155:342:HHGFNDSXY:1:2675:25129:19335 1:N:0:GAACCTAG+TCCGCATA  
TCAACGCAGACCATATCTGTGCCGAGTTGGGTAGGTCAGGTGCCCTAGCACCTTCCTCCCCTTTCAAC  
CATGCGTCCACCCCGGTTAATTTTGACCCGTGACGGTAATACAATAGCTCGGTAAGCTTGGGTGAGTC  
+  
FFFFFFFFFFFFFFFFFFFFFFFFFFFFFFFFFFFFFFFFFFFFFFFFFFFFFFFFFFFFFFFFFFFFFFFF  
FFFFFFFFFFFFFFFFFFFFFFFFFFFFFFFFFFFFFFFFFFFFFFFFFFFFFFFFFFFFFFFFFFFFFFFF  
@A00155:342:HHGFNDSXY:1:1343:10502:35305 2:N:0:GAACCTAG+TCCGCATA  
TCAACGCAGACCATATCTGTGCCGAGTTGGGTAGGTCAGGTGCCCTAGCACCTTCCTCCCCTTTCAAC  
CATGCGTCCACCCCGGTTAATTTTGACCCGTGACGGTAATACAATAGCTCGGTAAGCTTGGGTGAGTC  
+  
FFFFFFFFFFFFFFFFFFFFFFFFFFFFFFFFFFFFFFFFFFFFFFFFFFFFFFFFFFFFFFFFFFFFFFFF  
FFFFFFFFFFFFFFFFFFFFFFFFFFFFFFFFFFFFFFFFFFFFFFFFFFFFFFFFFFFFFFFFFFFFFFFF  
@A00155:342:HHGFNDSXY:1:2460:11532:25316 1:N:0:GAACCTAG+TCCGCATA  
TCAACGCAGACCATATCTGTGCCGAGTTGGGTAGGTCAGGTGCCCTAGCACCTTCCTCCCCTTTCAAC

CATGCGTCCACCCCGGTAAATTTTGACCCGTGACGGTAATAACAATAGCTCGGTAAGCTTGGGTGAGTC  
+  
FFFFFFFFFFFFFFFFFFFFFFFFFFFFFFFFFFFFFFFFFFFFFFFFFFFFFFFFFFFFF,:F:FFFFFFFFFFFFFFFF  
FFFFFFFFFFFFFFFFFFFFFFFFFFFFFFFFFFFFFFFFFFFFFFFFFFFFFFFFFFFFFFFFFFFFFFFFFFFFFFFF  
@A00155:342:HHGFNDSXY:1:1472:6506:3709 1:N:0:GAACCTAG+TCCGCATA  
TCAACGCAGACCATATCTGTGCCGAGTTGGGTAGGTCAGGTGCCCTAGCACCTTCCTCCCCTTTCAAC  
CATGCGTCCACCCCGGTAAATTTTGACCCGTGACGGTAATAACAATAGCTCGGTAAGCTTGGGTGAGTC  
+  
FFFFFFFFFFFFFFFFFFF:FFF:FFFFFFFFFFFFFFFFFFFFFFFFFFFFFFFFFFFFFFFF:FF::FFFFFFFFFFFFFF  
FFFFFFFFFFFFFFFFFFFFFFFFFFFFFFFFFFFFFFFFFFFFFFFFFFFFFFFFFFFFFFFFFFFFFFFFFFFFFFF  
@A00155:342:HHGFNDSXY:1:1114:4833:12931 1:N:0:GAACCTAG+TCCGCATA  
TCAACGCAGACCATATCTGTGCCGAGTTGGGTAGGTCATGTGCCCTAGCACCTTCCTCCCCTTTCAAC  
CATGCGTCCACCCCGGTAAATTTTGACCCGTGACGGTAATAACAATAGCTCGGTAAGCTTGGGTGAGTC  
+  
FFFFFFFFFFFFFFFFFFFF,FFF,,FFFFFFF:,FFF,FFFF,,FFFF:FF:FFFF:FFFFFFFFFFFFFFFF  
FFFFFFFFFFFFFFFFFFFFFFFFFFFFFFFFFFFFFFFFFFFFFFFFFFFFFFFFFFFFFFFFFFFFFFFFFFFFFFF:  
FFFFFFFFFFFFFFFFFFFFFFFFFFFFFFFFFFFFFFFFFFFFFFFFFFFFFFFFFFFFFFFFFFFFFFFFFFFFFFF:  
@A00155:342:HHGFNDSXY:1:1617:6325:19554 1:N:0:GAACCTAG+TCCGCATA  
TCAACGCAGACCATATCTGTGCCGAGTTGGGTAGGTCAGGTGCCCTAGCACCTTCCTCCCCTTTCAAC  
CATGCGTCCACCCCGGTAAATTTTGACCCGTGACGGTAATAACAATAGCTCGGTAAGCTTGGGTGAGTC  
+  
FFFFFFFFFFFFFFFFFFFFFFFFFFFFFFFFFFFFFFFFFFFFFFFFFFFFFFFFFFFFFFFFFFFFFFFFFFFFFFF:  
FFFFFFFFFFFFFFFFFFFFFFFFFFFFFFFFFFFFFFFFFFFFFFFFFFFFFFFFFFFFFFFFFFFFFFFFFFFFFFF:  
@A00155:342:HHGFNDSXY:1:2360:2763:22999 1:N:0:GAACCTAG+TCCGCATA  
TCAACGCAGACCATATCTGTGCCGAGTTGGGTAGGTCAGGTGCCCTAGCACCTTCCTCCCCTTTCAAC  
CATGCGTCCACCCCGGTAAATTTTGACCCGTGACGGTAATAACAATAGCTCGGTAAGCTTGGGTGAGTC  
+  
FFFFFFFFFFFFFFFFFFFFFFFFFFFFFFFFFFFFFFFFFFFFFFFFFFFFFFFFFFFFFFFFFFFFFFFFFFFFFFF:FF:FFFFFFFFFFFFFF  
FFFFFFFFFFFFFFFFFFFFFFFFFFFFFFFFFFFFFFFFFFFFFFFFFFFFFFFFFFFFFFFFFFFFFFFFFFFFFFF:  
@A00155:342:HHGFNDSXY:1:1167:7328:15562 1:N:0:GAACCTAG+TCCGCATA  
TCAACGCAGACCATATCTGTGCCGAGTTGGGTAGGTCAGGTGCCCTAGCACCTTCCTCCCCTTTCAAC  
CATGCGTCCACCCCGGTAAATTTTGACCCGTGACGGTAATAACAATAGCTCGGTAAGCTTGGGTGAGTC  
+  
FFFFFFFFFFFFFFFFFFFFFFFFFFFFFFFFFFFFFFFFFFFFFFFFFFFFFFFFFFFFFFFFFFFFFFFFFFFFFFF:FF,FFFFFFFFFFFFFFFF  
FFFFFFFFFFFFFFFFFFFFFFFFFFFFFFFFFFFFFFFFFFFFFFFFFFFFFFFFFFFFFFFFFFFFFFFFFFFFFFF:  
@A00155:342:HHGFNDSXY:1:1557:30662:16892 1:N:0:GAACCTAG+TCCGCATA  
TCAACGCAGACCATATCTGTGCCGAGTTGGGTAGGTCAGGTGCCCTAGCACCTTCCTCCCCTTTCAAC  
CATGCGTCCACCCCGGTAAATTTTGACCCGTGACGGTAATAACAATAGCTCGGTAAGCTTGGGTGAGTC  
+  
FFFFFFFFFFFFFFFFFFFFFFFFFFFFFFFFFFFFFFFFFFFFFFFFFFFFFFFFFFFFFFFFFFFFFFFFFFFFFFF:  
FFFFFFFFFFFFFFFFFFFFFFFFFFFFFFFFFFFFFFFFFFFFFFFFFFFFFFFFFFFFFFFFFFFFFFFFFFFFFFF:  
@A00155:342:HHGFNDSXY:1:2147:18566:11099 1:N:0:GAACCTAG+TCCGCATA  
CAACGCAGACCATATCTGTGCCGAGTTGGGTAGGTCAGGTGCCCTAGCACCTTCCTCCCCTTTCAACC  
ATGCGTCCACCCCGGTAAATTTTGACCCGTGACGGTAATAACAATAGCTCGGTAAGCTTGGGTGAGTCA  
+  
FFFFFFFFFFFFFFFFFFFFFFFFFFFFFFFFFFFFFFFFFFFFFFFFFFFFFFFFFFFFFFFFFFFFFFFFFFFFFFF:  
FFFFF:,FFFFFFFFFFFFFFF:,::FFFFFFFFFFFFFFF:,FFFFF:FF,FFFFF:FFFFFFFFFFFFFFF:FF  
@A00155:342:HHGFNDSXY:1:1644:21206:16485 1:N:0:GAACCTAG+TCCGCATA  
CAACGCAGACCATATCTGTGCCGAGTTGGGTAGGTCAGGTGCCCTAGCACCTTCCTCCCCTTTCAACC  
ATGCGTCCACCCCGGTAAATTTTGACCCGTGACGGTAATAACAATAGCTCGGTAAGCTTGGGTGAGTCA  
+  
FFFFFFFFFFFFFFFFFFFFFFFFFFFFFFFFFFFFFFFFFFFFFFFFFFFFFFFFFFFFFFFFFFFFFFFFFFFFFFF  
FFFFFFFFFFFFFFFFFFFFFFFFFFFFFFFFFFFFFFFFFFFFFFFFFFFFFFFFFFFFFFFFFFFFFFFFFFFFFFF,  
@A00155:342:HHGFNDSXY:1:2213:29369:21825 1:N:0:GAACCTAG+TCCGCATA  
CAACGCAGACCATATCTGTGCCGAGTTGGGTAGGTCAGGTGCCCTAGCACCTTCCTCCCCTTTCAACC

ATGCGTCCACCCCGGTTAATTTTGACCCGTGACGGTAATACAATAGCTCGGTAAGCTTGGGTGAGTCA  
+  
FFFFFFFFFFFFFF:FFFFFFFFFFFFFFFFFFFFFFFFFFFFFFFFFFFFFFFFFFFFFFFFFFFFFFFF  
FFFFFFFFFFFFFFFFFFFFFFFFFFFFFFFFFFFFFFFFFFFFFFFFFFFFFFFFFFFFFFFFFFFFFFFF  
@A00155:342:HHGFNDSXY:1:1254:19063:19664 1:N:0:GAACCTAG+TCCGCATA  
CAACGCAGACCATATCTGTGCCGAGTTGGGTAGGTCAGGTGCCCTAGCACCTTCCTCCCCTTTCAACCA  
ATGCGTCCACCCCGGTTAATTTTGACCCGTGACGGTAATACAATAGCTCGGTAAGCTTGGGTGAGTCA  
+  
FFFFFFFFFFFFFFFFFFFFFFFFFFFFFFFFFFFFFFFFFFFFFFFFFFFFFFFFFFFFFFFFFFFFFFFF  
FFFFFFFFFFFFFFFFFFFFFFFFFFFFFFFFFFFFFFFFFFFFFFFFFFFFFFFFFFFFFFFFFFFFFFFF:FFFFF,FFFF  
@A00155:342:HHGFNDSXY:1:2643:8829:28244 1:N:0:GAACCTAG+TCCGCATA  
AACGCAGACCATATCTGTGCCGAGTTGGGTAGGTCAGGTGCCCTAGCACCTTCCTCCCCTTTCAACCA  
TGCGTCCACCCCGGTTAATTTTGACCCGTGACGGTAATACAATAGCTCGGTAAGCTTGGGTGAGTCAA  
+  
FFFFFFFFFFFFFFFFFFFFFFFFFFFFFFFFFFFFFFFFFFFFFFFFFFFFFFFFFFFFFFFFFFFFFFFF  
FFFFFFFFFFFFFFFFFFFFFFFFFFFFFFFFFFFFFFFFFFFFFFFFFFFFFFFFFFFFFFFFFFFFFFFF  
@A00155:342:HHGFNDSXY:1:1672:10248:15608 1:N:0:GAACCTAG+TCCGCATA  
AACGCAGACCATATCTGTGCCGAGTTGGGTAGGTCAGGTGCCCTAGCACCTTCCTCCCCTTTCAACCA  
TGCGTCCACCCCGGTTAATTTTGACCCGTGACGGTAATACAATAGCTCGGTAAGCTTGGGTGAGTCAA  
+  
FFFFFFFFFFFFFFFFFFFFFFFFFFFFFFFFFFFFFFFFFFFFFFFFFFFFFFFFFFFFFFFFFFFFFFFF  
FFF:FFFFFFFFFFFFFFFFFFFFFFFFFFFFFFFFFFFFFFFFFFFFFFFFFFFFFFFFFFFFFFFFFFFF  
@A00155:342:HHGFNDSXY:1:1329:17282:36213 1:N:0:GAACCTAG+TCCGCATA  
AACGCAGACCATATCTGTGCCGAGTTGGGTAGGTCAGGTGCCCTAGCACCTTCCTCCCCTTTCAACCA  
TGCGTCCACCCCGGTTAATTTTGACCCGTGACGGTAATACAATAGCTCGGTAAGCTTGGGTGAGTCAA  
+  
FFFFFFFFFFFFFFFFFFFFFFFFFFFFFFFFFFFFFFFFFFFFFFFFFFFFFFFFFFFFFFFFFFFF,FF:FFFFFFFFFFFF  
FFFFFFFFFFFFFFFFFFFFFFFFFFFFFFFFFFFFFFFFFFFFFFFFFFFFFFFFFFFFFFFFFFFFFFFF  
@A00155:342:HHGFNDSXY:1:1625:4327:9392 1:N:0:GAACCTAG+TCCGCATA  
AACGCAGACCATATCTGTGCCGAGTTGGGTAGGTCAGGTGCCCTAGCACCTTCCTCCCCTTTCAACCA  
TGCGTCCACCCCGGTTAATTTTGACCCGTGACGGTAATACAATAGCTCGGTAAGCTTGGGTGAGTCAA  
+  
FFFFFFFFFFFFFFFFFFFFFFFFFFFFFFFFFFFFFFFFFFFFFFFFFFFFFFFFFFFFFFFFFFFF:FFFFFFFFF,FFFFFFFFFFFF  
FFFFFFFFFFFFFFFFFFFFFFFFFFFFFFFFFFFFFFFFFFFFFFFFFFFFFFFFFFFFFFFFFFFFFFFF:FFFFFFFFFFFFFFFFFFFF  
@A00155:342:HHGFNDSXY:1:2305:14968:19335 1:N:0:GAACCTAG+TCCGCATA  
AACGCAGACCATATCTGTGCCGAGTTGGGTAGGTCAGGTGCCCTAGCACCTTCCTCCCCTTTCAACCA  
TGCGTCCACCCCGGTTAATTTTGACCCGTGACGGTAATACAATAGCTCGGTAAGCTTGGGTGAGTCAA  
+  
FFFFFFFFFFFFFFFFFFFFFFFFFFFFFFFFFFFFFFFFFFFFFFFFFFFFFFFFFFFFFFFFFFFF  
FFFFFFFFFFFFFFFFFFFFFFFFFFFFFFFFFFFFFFFFFFFFFFFFFFFFFFFFFFFFFFFFFFFF:FFFFF  
@A00155:342:HHGFNDSXY:1:1207:3242:7169 1:N:0:GAACCTAG+TCCGCATA  
AACGCAGACCATATCTGTGCCGAGTTGGGTAGGTCAGGTGCCCTAGCACCTTCCTCCCCTTTCAACCA  
TGCGTCCACCCCGGTTAATTTTGACCCGTGACGGTAATACAATAGCTCGGTAAGCTTGGGTGAGTCAA  
+  
FFF:FFFFF,FFFFFFFFF::FFFFFF:,FFF:F,FFFFFFFFFFFF:F:FFFFFFFFFFFFFFFFFFFF  
FF:FFFFFFFFFFFFFFFFFFFFFFFFFFFFFFFFFFFFFFFFFFFFFFFFFFFF:FFF,,FFFFFFFFF:FFFFFFFFFFFFFFFFFFFF  
@A00155:342:HHGFNDSXY:1:2165:4915:23594 1:N:0:GAACCTAG+TCCGCATA  
AACGCAGACCATATCTGTGCCGAGTTGGGTAGGTCAGGTGCCCTAGCACCTTCCTCCCCTTTCAACCA  
TGCGTCCACCCCGGTTAATTTTGACCCGTGACGGTAATACAATAGCTCGGTAAGCTTGGGTGAGTCAA  
+  
FFFFFFFFFFFFF:FFFFFFFFFFFFFFFFFFFF:FFFFFFFFFFFFFFFFFFFFFFFFFFFFFFFFFFFF  
FFFFF:FFFFFFFFFFFFFFFFFFFFFFFFFFFFFFFFFFFFFFFFFFFFFFFFFFFF:FFFFFFFFFFFFFFFFFFFF  
@A00155:342:HHGFNDSXY:1:2458:22860:27430 1:N:0:GAACCTAG+TCCGCATA  
AACGCAGACCATATCTGTGCCGAGTTGGGTAGGTCAGGTGCCCTAGCACCTTCCTCCCCTTTCAACCA

TGCGTCCACCCCGGTTAATTTTGACCCGTGACGGTAATACAATAGCTCGGTAAGCTTGGGTGAGTCAA  
 +  
 FFFFFFFFFFFFFFFFFFFFFFFFFFFFFFFFFFFFFFFFFFFFFFFFFFFFFFFFFFFFFFFFFFFFFFFFFF:FFFFFFFFFFFFFFFFFFFFF  
 FFFFFFFFFFFFFFFFFFFFFFFFFFFFFFFFFFFFFFFFFFFFFFFFFFFFFFFFFFFFFFFFFFFFFFFFFF  
 @A00155:342:HHGFNDSXY:1:2511:8169:35243 1:N:0:GAACCTAG+TCCGCATA  
 AACGCAGACCATATCTGTGCCGAGTTGGGTAGGTCAGGTGCCCTAGCACCTTCCTCCCCTTTCAACCA  
 TGCGTCCACCCCGGTTAATTTTGACCCGTGACGGTAATACAATAGCTCGGTAAGCTTGGGTGAGTCAA  
 +  
 FFFFFF:FFFFFFFFFFFF:FFFFFFFFFFFFFFFFFFFFFFFFFFFFFFFFFFFFFFFFFFFFFFFFFFFF  
 FFFFFFFFFFFFFFFFFFFFFFFFFFFFFFFFFFFFFFFFFFFFFFFFFFFFFFFFFFFFFFFFFFFFFFFFFF  
 @A00155:342:HHGFNDSXY:1:1609:9598:36370 1:N:0:GAACCTAG+TCCGCATA  
 AACGCAGACCATATCTGTGCCGAGTTGGGTAGGTCAGGTGCCCTAGCACCTTCCTCCCCTTTCAACCA  
 TGCGTCCACCCCGGTTAATTTTGACCCGTGACGGTAATACAATAGCTCGGTAAGCTTGGGTGAGTCAA  
 +  
 FFFFFFFFFFFFFFFFFFFFFFFFFFFFFFFFFFFFFFFFFFFFFFFFFFFFFFFFFFFFFFFFFFFFFFFFFF  
 FFFFFFFFFFFFFFFFFFFFFFFFFFFFFFFFFFFFFFFFFFFFFFFFFFFFFFFFFFFFFFFFFFFFFFFFFF  
 @A00155:342:HHGFNDSXY:1:1547:8449:11365 1:N:0:GAACCTAG+TCCGCATA  
 AACGCAGACCATATCTGTGCCGAGTTGGGTAGGTCAGGTGCCCTAGCACCTTCCTCCCCTTTCAACCA  
 TGCGTCCACCCCGGTTAATTTTGACCCGTGACGGTAATACAATAGCTCGGTAAGCTTGGGTGAGTCAA  
 +  
 FFFFFFFFFFFFFFFFFFFFFFFFFFFFFFFFFFFFFFFFFFFFFFFFFFFFFFFFFFFFFFFFFFFFFFFFFF:  
 FFFFFFFFFFFFFFFFFFFFFFFFFFFFFFFFFFFFFFFFFFFFFFFFFFFFFFFFFFFFFFFFFFFFFFFFFF  
 @A00155:342:HHGFNDSXY:1:1226:22046:20165 1:N:0:GAACCTAG+TCCGCATA  
 AACGCAGACCATATCTGTGCCGAGTTGGGTAGGTCAGGTGCCCTAGCACCTTCCTCCCCTTTCAACCA  
 TGCGTCCACCCCGGTTAATTTTGACCCGTGACGGTAATACAATAGCTCGGTAAGCTTGGGTGAGTCAA  
 +  
 FFFFFFFFFFFFFFFFFFFFFFFFFFFFFFFFFFFFFFFFFFFFFFFFFFFFFFFFFFFFFFFFFFFFFFFFFF:  
 FFFFFFFFFFFFFFFFFFFFFFFFFFFFFFFFFFFFFFFFFFFFFFFFFFFFFFFFFFFFFFFFFFFFFFFFFF  
 @A00155:342:HHGFNDSXY:1:2178:10041:9424 1:N:0:GAACCTAG+TCCGCATA  
 ACGCAGACCATATCTGTGCCGAGTTGGGTAGGTCAGGTGCCCTAGCACCTTCCTCCCCTTTCAACCAT  
 GCGTCCACCCCGGTTAATTTTGACCCGTGACGGTAATACAATAGCTCGGTAAGCTTGGGTGAGTCAA  
 +  
 FFFFFFFFFFFFFFFFFFFFFFFFFFFFFFFFFFFFFFFFFFFFFFFFFFFFFFFFFFFFFFFFFFFFFFFFFF  
 FFFFFFFFFFFFFFFFFFFFFFFFFFFFFFFFFFFFFFFFFFFFFFFFFFFFFFFFFFFFFFFFFFFFFFFFFF  
 @A00155:342:HHGFNDSXY:1:1446:9218:33364 2:N:0:GAACCTAG+TCCGCATA  
 GCAGACCATATCTGTGCCGAGTTGGGTAGGTCAGGTGCCCTAGCACCTTCCTCCCCTTTCAACCATGC  
 GTCCACCCCGGTTAATTTTGACCCGTGACGGTAATACAATAGCTCGGTAAGCTTGGGTGAGTCAA  
 +  
 FFFFFFFFFFFFFFFFFFFFFFFFFFFFFFFFFFFFFFFFFFFFFFFFFFFFFFFFFFFFFFFFFFFFFFFFFF  
 FFFFFFFFFFFFFFFFFFFFFFFFFFFFFFFFFFFFFFFFFFFFFFFFFFFFFFFFFFFFFFFFFFFFFFFFFF  
 @A00155:342:HHGFNDSXY:1:1668:10673:35509 2:N:0:GAACCTAG+TCCGCATA  
 CAGACCATATCTGTGCCGAGTTGGGTAGGTCAGGTGCCCTAGCACCTTCCTCCCCTTTCAACCATGCG  
 TCCACCCCGGTTAATTTTGACCCGTGACGGTAATACAATAGCTCGGTAAGCTTGGGTGAGTCAA  
 +  
 F:FFFFF,FF,FFFF:FF,FFFF,FFFF:FFFF:FF:F:FFF:F::FFFFF:FFFFFFFF,FFFFF  
 FFFFFFF:FFFFFFFFFFFFFFFFFFFFFFFF:FFFFFFFF:F:F:FFFF:FFF:FFFFFFFFFFFFFF,FF  
 @A00155:342:HHGFNDSXY:1:1668:12029:27837 2:N:0:GAACCTAG+TCCGCATA  
 CAGACCATATCTGTGCCGAGTTGGGTAGGTCAGGTGCCCTAGCACCTTCCTCCCCTTTCAACCATGCG  
 TCCACCCCGGTTAATTTTGACCCGTGACGGTAATACAATAGCTCGGTAAGCTTGGGTGAGTCAA  
 +  
 F,FF:FFF:FFFF:FFF:FFFFFFFFFFFF,FF:F,FFFF,FFFFFFFF:F,FFFFFFFFFFFFFF  
 FFFFF::FFFFF,FFF:FFF:FFFF:FFFFF:FFFFFFFFFFFFFFFF,FFFFF,:FFFFFFFFFFFF  
 @A00155:342:HHGFNDSXY:1:2147:18566:11099 2:N:0:GAACCTAG+TCCGCATA  
 CAGACCATATCTGTGCCGAGTTGGGTAGGTCAGGTGCCCTAGCACCTTCCTCCCCTTTCAACCATGCG

TCCACCCCGGTTAATTTTGACCCGTGACGGTAATACAATAGCTCGGTAAGCTTGGGTGAGTCAAAATC  
+  
FFFFFFFFFFFFFFFF:FFFF:FFFFFFFFFFFFFFFF:FFFFFFFFFFFFFFFFFFFFFFFF:FF  
FFFF:FFFFFFFFFFFFFFFFFFFFFFFFFFFFFFFF: :FFFFFFFFFFFFFFFFFFFFFFFF  
@A00155:342:HHGFNDSXY:1:2327:9037:32831 2:N:0:GAACCTAG+TCCGCATA  
AGACCATATCTGTGCCGAGTTGGGTAGGTCAGGTGCCCTAGCACCTTCCTCCCCTTTCAACCATGCGT  
CCACCCCGGTTAATTTTGACCCGTGACGGTAATACAATAGCTCGGTAAGCTTGGGTGAGTCAAAATCT  
+  
F:FF:FFFF:F:FFFFFFFFFFFFFF,FFFFFFFFFF:FF:FFFF: :FFFFFF,FFFFFFFF:F:F  
FFFFFFFFFFFFFFFFFFFFFFFFFFFFFFFF:FFFFFFFFFFFFFFFFFFFFFFFF:FFFFFFF  
@A00155:342:HHGFNDSXY:1:1241:20021:8609 2:N:0:GAACCTAG+TCCGCATA  
GACCATATCTGTGCCGAGTTGGGTAGGTCAGGTGCCCTAGCACCTTCCTCCCCTTTCAACCATGCGTC  
CACCCCGGTTAATTTTGACCCGTGACGGTAATACAATAGCTCGGTAAGCTTGGGTGAGTCAAAATCTA  
+  
FFFFF,FFFFFFFFF:FFFFFFFFFFFFFFFF:FFFFFFF:FFF:FFFFFFFFFFFFFFFFFFFF  
FFFFFFFFFFFFFFFFFFFFFFFFFFFFFFFFFFFFFFFFFFFFFFFFFFFFFFFFFFFFFFFF:FFFFFFF  
@A00155:342:HHGFNDSXY:1:2234:10411:16611 1:N:0:GAACCTAG+TCCGCATA  
ACCATATCTGTGCCGAGTTGGGTAGGTCAGGTGCCCTAGCACCTTCCTCCCCTTTCAACCATGCGTCC  
ACCCCGGTTAATTTTGACCCGTGACGGTAATACAATAGCTCGGTAAGCTTGGGTGAGTCAAAATCTAG  
+  
F:FFFFFF:FFFFFFFFFFFF:FFFFFFFFF:FF:FFFFFF,,FFFF:FF:FFFFFFFFFFFF:FFF:FF  
FFFF:FFFFFFFFF:F:FFF,FFFF:F: :FFFFFFFFFFFFFFFF:FFFF:FF:FFFFFFFFFFFF:FFFFF  
@A00155:342:HHGFNDSXY:1:1467:19018:15734 1:N:0:GAACCTAG+TCCGCATA  
ACCATATCTGTGCCGAGTTGGGTAGGTCAGGTGCCCTAGCACCTTCCTCCCCTTTCAACCATGCGTCC  
ACCCCGGTTAATTTTGACCCGTGACGGTAATACAATAGCTCGGTAAGCTTGGGTGAGTCAAAATCTAG  
+  
FFFFFFFFFFFFFFFFFFFFFFFFFFFFFFFFFFFFFFFFFFFFFFFFFFFFFFFFFFFFFFFFFFFF  
FFFFFFFFFFFFFFFFFFFFFFFFFFFFFFFFFFFFFFFFFFFFFFFFFFFFFFFFFFFFFFFFFFFF  
@A00155:342:HHGFNDSXY:1:2460:11532:25316 2:N:0:GAACCTAG+TCCGCATA  
CCATATCTGTGCCGAGTTGGGTAGGTCAGGTGCCCTAGCACCTTCCTCCCCTTTCAACCATGCGTCCA  
CCCCGGTTAATTTTGACCCGTGACGGTAATACAATAGCTCGGTAAGCTTGGGTGAGTCAAAATCTAGT  
+  
FFFFFFFFFFFFFFFFFFFFFFFFFFFFFFFFFFFFFFFFFFFFFFFFFFFFFFFFFFFFFFFFFFFF:FFFFFFFFFFFFF  
FFFFFFFFFFFFFFFFFFFFFFFFFFFFFFFFFFFFFFFFFFFFFFFFFFFFFFFFFFFFFFFFFFFF:FFFFFFFFFFFFF  
@A00155:342:HHGFNDSXY:1:2360:2763:22999 2:N:0:GAACCTAG+TCCGCATA  
CCATATCTGTGCCGAGTTGGGTAGGTCAGGTGCCCTAGCACCTTCCTCCCCTTTCAACCATGCGTCCA  
CCCCGGTTAATTTTGACCCGTGACGGTAATACAATAGCTCGGTAAGCTTGGGTGAGTCAAAATCTAGT  
+  
FFFFFFFFFFFFFFFFFFFFFFFFFFFFFFFFFFFFFFFFFFFF,FFFF:FFFF:FFFFFFFFFFFFFFFFFFFFFFFF  
FFFFFFFFFFFFFFFFFFFFFFFFFFFFFFFFFFFFFFFFFFFFFFFFFFFFFFFFFFFFFFFFFFFF:FFFFFFFFFFFFF  
@A00155:342:HHGFNDSXY:1:2117:1434:11459 1:N:0:GAACCTAG+TCCGCATA  
CATATCTGTGCCGAGTTGGGTAGGTCAGGTGCCCTAGCACCTTCCTCCCCTTTCAACCATGCGTCCAC  
CCCGGTTAATTTTGACCCGTGACGGTAATACAATAGCTCGGTAAGCTTGGGTGAGTCAAAATCTAGTC  
+  
FFFFFFFFFFFFFFFFFFFFFFFFFFFFFFFFFFFFFFFFFFFFFFFFFFFFFFFFFFFFFFFFFFFF:FFFFFFFFFFFFF:FFFFFFFFFFFFF  
FFFFFFFFFFFFFFFFFFFFFFFFFFFFFFFFFFFFFFFFFFFFFFFFFFFFFFFFFFFFFFFFFFFF:FFFFFFFFFFFFF:F: :F:FFFFF  
@A00155:342:HHGFNDSXY:1:1315:11993:27273 1:N:0:GAACCTAG+TCCGCATA  
CATATCTGTGCCGAGTTGGGTAGGTCAGGTGCCCTAGCACCTTCCTCCCCTTTCAACCATGCGTCCAC  
CCCGGTTAATTTTGACCCGTGACGGTAATACAATAGCTCGGTAAGCTTGGGTGAGTCAAAATCTAGTC  
+  
FFFFFFFFFFFFFFFFFFFFFFFFFFFFFFFFFFFFFFFFFFFFFFFFFFFFFFFFFFFFFFFFFFFF:FFFF,FFFFFFFFFFFFFFFFFFFF:FFFFF  
FFFF:FFFFFFFFFFFF,FF:FFFFFFFFFFFFFFFFFFFFFFFF:FFFFFFFF:F:FFFFFFFFFFFFFFFFFFFF  
@A00155:342:HHGFNDSXY:1:2425:7301:12226 1:N:0:GAACCTAG+TCCGCATA  
CATATCTGTGCCGAGTTGGGTAGGTCAGGTGCCCTAGCACCTTCCTCCCCTTTCAACCATGCGTCCAC

CCCGGTTAATTTTGACCCGTGACGGTAATACAATAGCTCGGTAAGCTTGGGTGAGTCAAAATCTAGTC  
+  
FFFFFFFF:FFFFFFFFFFFFFFFFFFFFFFFF:FFFF:FFFFF:FFFF:FFFFFFFFFFFFFFFFFFFF  
FFFFFFFFFFFFFFFFFFFFFFFFFFFFFFFF:,FFF,FFFFFFFF:FFFFFFFFFFFFFFFFFFFFFFFF  
@A00155:342:HHGFNDSXY:1:1241:20021:8609 1:N:0:GAACCTAG+TCCGCATA  
CATATCTGTGCCGAGTTGGGTAGGTCAGGTGCCCTAGCACCTTCCTCCCCTTTCAACCATGCGTCCAC  
CCCGGTTAATTTTGACCCGTGACGGTAATACAATAGCTCGGTAAGCTTGGGTGAGTCAAAATCTAGTC  
+  
FFFFFFFFFFFFFFFFFFFFFFFFFFFFFFFFFFFFFFFFFFFFFFFFFFFFFFFFFFFFFFFF, :FF:FFFFFFFFFFFFFFFFFFFFFFFF  
FFFFFFFFFFFFFFFFFFFFFFFFFFFFFFFFFFFFFFFFFFFFFFFFFFFFFFFFFFFFFFFF:FFFF:F:F  
@A00155:342:HHGFNDSXY:1:1146:1470:33567 1:N:0:GAACCTAG+TCCGCATA  
CATATCTGTGCCGAGTTGGGTAGGTCAGGTGCCCTAGCACCTTCCTCCCCTTTCAACCATGCGTCCAC  
CCCGGTTAATTTTGACCCGTGACGGTAATACAATAGCTCGGTAAGCTTGGGTGAGTCAAAATCTAGTC  
+  
FFFFFFFFFFFFFFFFFFFFFFFFFFFFFFFFFFFFFFFFFFFFFFFFFFFFFFFFFFFFFFFFFFFFFFFF  
FFFFFFFFFFFFFFFFFFFFFFFFFFFFFFFFFFFFFFFFFFFFFFFFFFFFFFFFFFFFFFFF:FFFFFFFFFFFFFFFFFFFFFFFF  
@A00155:342:HHGFNDSXY:1:1138:12798:11851 2:N:0:GAACCTAG+TCCGCATA  
ATATCTGTGCCGAGTTGGGTAGGTCAGGTGCCCTAGCACCTTCCTCCCCTTTCAACCATGCGTCCACC  
CCGGTTAATTTTGACCCGTGACGGTAATACAATAGCTCGGTAAGCTTGGGTGAGTCAAAATCTAGTCT  
+  
FFFFFFFFFFFFFFFFFFFFFFFFFFFFFFFFFFFFFFFFFFFFFFFFFFFFFFFFFFFFFFFFFFFFFFFF  
FFFFFFFF:FFFFFFFFFFFFFFFFFFFFFFFFFFFFFFFFFFFFFFFFFFFFFFFFFFFFFFFFFFFFFFFF:FFFFFFFFFFFFFFFF  
@A00155:342:HHGFNDSXY:1:2507:12084:22420 2:N:0:GAACCTAG+TCCGCATA  
ATATCTGTGCCGAGTTGGGTAGGTCAGGTGCCCTAGCACCTTCCTCCCCTTTCAACCATGCGTCCACC  
CCGGTTAATTTTGACCCGTGACGGTAATACAATAGCTCGGTAAGCTTGGGTGAGTCAAAATCTAGTCT  
+  
FFFFFFFFFFFFFFFFFFFFFFFFFFFFFFFFFFFFFFFFFFFFFFFFFFFFFFFFFFFFFFFFFFFFFFFF  
FFFFFFFF:FFFFFFFFFFFFFFFFFFFFFFFFFFFFFFFFFFFFFFFFFFFFFFFFFFFFFFFFFFFFFFFF:FFFFFFFFFFFFFFFF  
@A00155:342:HHGFNDSXY:1:2458:22860:27430 2:N:0:GAACCTAG+TCCGCATA  
ATATCTGTGCCGAGTTGGGTAGGTCAGGTGCCCTAGCACCTTCCTCCCCTTTCAACCATGCGTCCACC  
CCGGTTAATTTTGACCCGTGACGGTAATACAATAGCTCGGTAAGCTTGGGTGAGTCAAAATCTAGTCT  
+  
FFFFFFFFFFFFFFFFFFFFFFFFFFFFFFFFFFFFFFFFFFFFFFFFFFFFFFFFFFFFFFFFFFFFFFFF  
FFFFFFFFFFFFFFFFFFFFFFFFFFFFFFFFFFFFFFFFFFFFFFFFFFFFFFFFFFFFFFFF:FFFF:FFFFFFFFFFFFFFFFFFFFFFFF  
FFFFFFFFFFFFFFFFFFFFFFFFFFFFFFFFFFFFFFFFFFFFFFFFFFFFFFFFFFFFFFFF:FFFFFFFFFFFFFFFF  
@A00155:342:HHGFNDSXY:1:1226:5367:24627 1:N:0:GAACCTAG+TCCGCATA  
ATATCTGTGCCGAGTTGGGTAGGTCAGGTGCCCTAGCACCTTCCTCCCCTTTCAACCATGCGTCCACC  
CCGGTTAATTTTGACCCGTGACGGTAATACAATAGCTCGGTAAGCTTGGGTGAGTCAAAATCTAGTCT  
+  
FFFFFFFFFFFFFFFFFFFFFFFFFFFFFFFFFFFFFFFFFFFFFFFFFFFFFFFFFFFFFFFF:FFF:FFFFFFFFFFFFFFFFFFFFFFFF  
FFFFFFFFFFFFFFFFFFFFFFFFFFFFFFFFFFFFFFFFFFFFFFFFFFFFFFFFFFFFFFFF:FFFFFFFFFFFFFFFFFFFFFFFF  
@A00155:342:HHGFNDSXY:1:2649:14534:14418 2:N:0:GAACCTAG+TCCGCATA  
ATATCTGTGCCGAGTTGGGTAGGTCAGGTGCCCTAGCACCTTCCTCCCCTTTCAACCATGCGTCCACC  
CCGGTTAATTTTGACCCGTGACGGTAATACAATAGCTCGGTAAGCTTGGGTGAGTCAAAATCTAGTCT  
+  
F:FFFFFFFFFFFFFFFFFFFFFFFFFFFFFFFFFFFFFFFFFFFFFFFFFFFFFFFFFFFFFFFF:FFFFFFFFFFFFFFFFFFFFFFFF  
FFFFFFFFFFFFFFFFFFFFFFFFFFFFFFFFFFFFFFFFFFFFFFFFFFFFFFFFFFFFFFFF:FFFFFFFFFFFFFFFFFFFFFFFF  
@A00155:342:HHGFNDSXY:1:1138:12798:11851 1:N:0:GAACCTAG+TCCGCATA  
TATCTGTGCCGAGTTGGGTAGGTCAGGTGCCCTAGCACCTTCCTCCCCTTTCAACCATGCGTCCACCC  
CGGTTAATTTTGACCCGTGACGGTAATACAATAGCTCGGTAAGCTTGGGTGAGTCAAAATCTAGTCTC  
+  
FFFFFFFFFFFFFFFFFFFFFFFFFFFFFFFFFFFFFFFFFFFFFFFFFFFFFFFFFFFFFFFF:FFFFFFFFFFFFFFFFFFFFFFFF  
FFFFFFFFFFFFFFFFFFFFFFFFFFFFFFFFFFFFFFFFFFFFFFFFFFFFFFFFFFFFFFFF:FFFFFFFFFFFFFFFFFFFFFFFF  
@A00155:342:HHGFNDSXY:1:1427:24514:29982 1:N:0:GAACCTAG+TCCGCATA  
TATCTGTGCCGAGTTGGGTAGGTCAGGTGCCCTAGCACCTTCCTCCCCTTTCAACCATGCGTCCACCC



```
CGGTTAATTTTGACCCGTGACGGTAATAACAATAGCTCGGTAAGCTTGGGTGAGTCAAATCTAGTCTC  
+  
FFFFFFFFFFFFFFFFFFFFFFFFFFFFFFFFFFFFFFFFFFFFFFFFFFFFFFFFFFFFF, FFFFFFFFFFFFFFFFFFFFFFFFFFFFFFFFFFFFFFFF  
FFFFFFFFFFFFFFFFFFFFFFFFFFFFFFFFFFFFFFFFFFFFFFFFFFFFFFFFFFFFFFFFF: : FFFFFFFFFFFFFFFFFFFFFFFFFFFFFFFFFFFFFFFF: FFFFFFFF  
@A00155:342:HHGFNDSXY:1:2451:24325:6198 2:N:0:GAACCTAG+TCCGCATA  
CTGTGCCGAGTTGGGTAGGTCAGGTGCCCTAGCACCTTCCTCCCCTTTCAACCATGCGTCCACCCCGG  
TTAATTTTGACCCGTGACGGTAATAACAATAGCTCGGTAAGCTTGGGTGAGTCAAATCTAGTCT  
+  
FFFFFFFFFFFFFFFFFFFFFFFFFFFFFFFFFFFFFFFFFFFFFFFFFFFFFFFFFFFFFFFFF  
FFFFFFFFFFFFFFFFFFFFFFFFFFFFFFFFFFFFFFFFFFFFFFFFFFFFFFFFFFFFFFFFF:F: FFFFFFFFFFFFFFFFFFFFFFFFFFFFFFFFFFFFFFFF: FFFFFFFFFFFF  
@A00155:342:HHGFNDSXY:1:2644:4327:19539 2:N:0:GAACCTAG+TCCGCATA  
CTGTGCCGAGTTGGGTAGGTCAGGTGCCCTAGCACCTTCCTCCCCTTTCAACCATGCGTCCACCCCGG  
TTAATTTTGACCCGTGACGGTAATAACAATAGCTCGGTAAGCTTGGGTGAGTCAAATCTAGTCT  
+  
FFFF: FFFFFFFFFFFFFFFFFFFFFFFFFFFFFFFFFFFFFFFFFFFFFFFFFFFFFFFFFFFFF: : FFFFFF: FFFFFFFFFFFFFFFF: FF, FFFFFFFFFFFFFFFF: F  
F: FFFFFFFFFFFFFFFFFFFFFFFFFFFFFFFFFFFFFFFFFFFFFFFFFFFFFFFFFFFFF: FFFFFFFFFFFFFFFFFFFFFFFFFFFFFFFFFFFFFFFF: FF  
@A00155:342:HHGFNDSXY:1:2462:21847:28369 2:N:0:GAACCTAG+TCCGCATA  
CTGTGCCGAGTTGGGTAGGTCAGGTGCCCTAGCACCTTCCTCCCCTTTCAACCATGCGTCCACCCCGG  
TTAATTTTGACCCGTGACGGTAATAACAATAGCTCGGTAAGCTTGGGTGAGTCAAATCTAGTCT  
+  
FFFFFFFFFFFFFFFFFFFFFFFFFFFFFFFFFFFFFFFFFFFFFFFFFFFFFFFFFFFFFFFFF, FFFFF, FFF: FFFFFFFFFFFFFFFF: FF: FFFFFFFFFFFFFFFF: F  
FFFFFFFFFFFFFFFFFFFFFFFFFFFFFFFFFFFFFFFFFFFFFFFFFFFFFFFFFFFFFFFFF: FFFFFFFFFFFFFFFFFFFFFFFFFFFFFFFFFFFFFFFF, FFFFFFFFFFFF  
@A00155:342:HHGFNDSXY:1:2446:20871:22388 2:N:0:GAACCTAG+TCCGCATA  
CTGTGCCGAGTTGGGTAGGTCAGGTGCCCTAGCACCTTCCTCCCCTTTCAACCATGCGTCCACCCCGG  
TTAATTTTGACCCGTGACGGTAATAACAATAGCTCGGTAAGCTTGGGTGAGTCAAATCTAGTCT  
+  
FFFFFFFFFFFFFFFFFFFFFFFFFFFFFFFFFFFFFFFFFFFFFFFFFFFFFFFFFFFFFFFFF: FFFFFFFFFFFFFFFFFFFFFFFFFFFFFFFFFFFFFFFF  
FFFFF: FFFFFFFFFFFFFFFFFFFFFFFF, FF: FFFFFFFFFFFFFFFFFFFFFFFFFFFFFFFFFFFFFFFFFFFFFFFFFFFFFFFFFFFFF  
@A00155:342:HHGFNDSXY:1:1334:28429:27367 2:N:0:GAACCTAG+TCCGCATA  
CTGTGCCGAGTTGGGTAGGTCAGGTGCCCTAGCACCTTCCTCCCCTTTCAACCATGCGTCCACCCCGG  
TTAATTTTGACCCGTGACGGTAATAACAATAGCTCGGTAAGCTTGGGTGAGTCAAATCTAGTCT  
+  
FFFFFFFFFFFFFFFFFFFFFFFFFFFFFFFFFFFFFFFFFFFFFFFFFFFFFFFFFFFFFFFFF  
FFFFFFFFFFFFFFFFFFFFFFFFFFFFFFFFFFFFFFFFFFFFFFFFFFFFFFFFFFFFFFFFF  
@A00155:342:HHGFNDSXY:1:2649:14534:14418 1:N:0:GAACCTAG+TCCGCATA  
CTGTGCCGAGTTGGGTAGGTCAGGTGCCCTAGCACCTTCCTCCCCTTTCAACCATGCGTCCACCCCGG  
TTAATTTTGACCCGTGACGGTAATAACAATAGCTCGGTAAGCTTGGGTGAGTCAAATCTAGTCTCGCT  
+  
FFFFFFFFFFFFFFFFFFFFFFFFFFFFFFFFFFFFFFFFFFFFFFFFFFFFFFFFFFFFFFFFF  
FFFFFFFFFFFF: FFFFFFFFFFFFFFFF: FFFFFFFFFFFFFFFFFFFFFFFF: FFF, FFFFFFFFFFFFFFFFFFFFFFFFFFFFFFFFFFFFFFFF  
@A00155:342:HHGFNDSXY:1:2426:5122:19570 1:N:0:GAACCTAG+TCCGCATA  
CTGTGCCGAGTTGGGTAGGTCAGGTGCCCTAGCACCTTCCTCCCCTTTCAACCATGCGTCCACCCCGG  
TTAATTTTGACCCGTGACGGTAATAACAATAGCTCGGTAAGCTTGGGTGAGTCAAATCTAGTCTCGCT  
+  
FFFFFFFFFFFFFFFFFFFFFFFFFFFFFFFFFFFFFFFFFFFFFFFFFFFFFFFFFFFFFFFFF  
FFFFF: FFFFFFFFFFFFFFFFFFFFFFFFFFFFFFFFFFFFFFFFFFFFFFFFFFFFFFFFFFFFF  
@A00155:342:HHGFNDSXY:1:2327:9037:32831 1:N:0:GAACCTAG+TCCGCATA  
CTGTGCCGAGTTGGGTAGGTCAGGTGCCCTAGCACCTTCCTCCCCTTTCAACCATGCGTCCACCCCGG  
TTAATTTTGACCCGTGACGGTAATAACAATAGCTCGGTAAGCTTGGGTGAGTCAAATCTAGTCTCGCT  
+  
FFFFFFFFFFFFFFFFFFFFF: FF: : F: FFFFFFFFFFFFFFFFFFFFFFFFFFFFFFFFFFFFF, FFFFFFFFF: FFF: FF: FFFFFFFFFF  
FFFFFFFF: FFFFFF: FFFFF, FFFFFFFFFFFFFFFFFFFFF: F: FFFFF: F: FFFFFFFFFFFFFFFFFFFFFFFFFFFFFF: : F  
@A00155:342:HHGFNDSXY:1:2239:17381:8234 2:N:0:GAACCTAG+TCCGCATA  
TGTGCCGAGTTGGGTAGGTCAGGTGCCCTAGCACCTTCCTCCCCTTTCAACCATGCGTCCACCCCGGT
```

+  
TAATTTTGACCCGTGACGGTAATAACAATAGCTCGGTAAGCTTGGGTGAGTCAAAATCTAGTCTCGCTC  
+  
FFFFFFFFFFFFFFFFFFFFFFFFFFFFFFFFFFFFFFFFFFFFF, FFFFFFFFFFFFFFFFFFFFFFFFFFFFFFFF:  
FFFFFFFFFFFFFFFFFFFFFFFFFFFFFFFFFFFFFFFFFFFFFFFF:F  
@A00155:342:HHGFNDSXY:1:2615:32253:15107 2:N:0:GAACCTAG+TCGCATA  
TGTGCCGAGTTGGGTAGGTCAGGTGCCCTAGCACCTTCCTCCCCTTTCAACCATGCGTCCACCCCGGT  
TAATTTTGACCCGTGACGGTAATAACAATAGCTCGGTAAGCTTGGGTGAGTCAAAATCTAGTCTCGCTC  
+  
FFFFFFFFFFFFFFFFFFFFFFFFFFFFFFFFFFFFFFFFFFFF, FFFFFFFFFFFFFFFFFFFFFFFFFFFFFFFF:FF  
FF:FFFFFFFFFFFFFFFFFFFFFFFFFFFFFFFFFFFFFFFFFFFFFFFFFFFFFFFFFFFFFFFF  
@A00155:342:HHGFNDSXY:1:1613:20292:7952 2:N:0:GAACCTAG+TCGCATA  
TGTGCCGAGTTGGGTAGGTCAGGTGCCCTAGCACCTTCCTCCCCTTTCAACCATGCGTCCACCCCGGT  
TAATTTTGACCCGTGACGGTAATAACAATAGCTCGGTAAGCTTGGGTGAGTCAAAATCTAGTCTCGCTC  
+  
FFFFFFFFFFFF, FFFFFFFF:FFF:FF:FF,, F::FFF,F,F:FFFF:F:FFFFFFFFFFFFFFFFFFFF:F  
FFFFFFFFFFFFFFFFFFFF, FFFFFF,FFFF,F:, FFFFFF:FFFF, FF:FFF:FFFFFFFFFFFFFFFFFFFF  
@A00155:342:HHGFNDSXY:1:1214:4309:27211 2:N:0:GAACCTAG+TCGCATA  
TGTGCCGAGTTGGGTAGGTCAGGTGCCCTAGCACCTTCCTCCCCTTTCAACCATGCGTCCACCCCGGT  
TAATTTTGACCCGTGACGGTAATAACAATAGCTCGGTAAGCTTGGGTGAGTCAAAATCTAGTCTCGCTC  
+  
FFFFFFFFFFFFFFFFFFFFFFFFFFFFFFFFFFFFFFFFFFFF:FFFFFFFFFFFFFFFFFFFFFFFFFFFFFFFFFFFF  
FFFFFFFFFFFFFFFFFFFF:FFFFFFFFFFFFFFFFFFFF, FFFFFF:FFFFFFFFFFFFFFFF:FFF, FFFFFFFF  
@A00155:342:HHGFNDSXY:1:2305:14968:19335 2:N:0:GAACCTAG+TCGCATA  
TGTGCCGAGTTGGGTAGGTCAGGTGCCCTAGCACCTTCCTCCCCTTTCAACCATGCGTCCACCCCGGT  
TAATTTTGACCCGTGACGGTAATAACAATAGCTCGGTAAGCTTGGGTGAGTCAAAATCTAGTCTCGCTC  
+  
:F:F:F:FFFFFFFF:FFF:F:FFFFFFFF:F:F:FF::FF:FFF::F:FFFFFFFFFF:FF:FFFFFF:  
FFFFFFFF:F:FFFF:F:FFF:FF:FFFF:FFF:FFF:FFF::FFFFFFFF:FFFF:F:FF:FFFFFF  
@A00155:342:HHGFNDSXY:1:1372:32362:15890 2:N:0:GAACCTAG+TCGCATA  
TGTGCCGAGTTGGGTAGGTCAGGTGCCCTAGCACCTTCCTCCCCTTTCAACCATGCGTCCACCCCGGT  
TAATTTTGACCCGTGACGGTAATAACAATAGCTCGGTAAGCTTGGGTGAGTCAAAATCTAGTCTCGCTC  
+  
FFFF:FFFFFFFFFFFFFFFFFFFFFFFFFFFF:FFFFF:FFFFFFFFFFFFFFFFFFFF:FFFF, FFFFFFFFFF  
FFFFFFFF:FFFFFFFFFFFF:FFF:FF::F:F:FFFFFFFF:FFFF:FFFFF:F:F:FFFFFFFFFFFF  
@A00155:342:HHGFNDSXY:1:2137:27037:28307 2:N:0:GAACCTAG+TCGCATA  
TGTGCCGAGTTGGGTAGGTCAGGTGCCCTAGCACCTTCCTCCCCTTTCAACCATGCGTCCACCCCGGT  
TAATTTTGACCCGTGACGGTAATAACAATAGCTCGGTAAGCTTGGGTGAGTCAAAATCTAGTCTCGCTC  
+  
FFFFFFFFFFFFFFFFFFFFFFFFFFFFFFFFFFFF:FFFFF:FFFFFFFFFFFFFFFFFFFFFFFFFFFFFFFFFFFF:FFFF  
FFFFFFFFFFFFFFFFFFFFFFFFFFFFFFFFFFFFFFFFFFFFFFFFFFFFFFFFFFFFFFFFFFFFFFFFFFFF  
@A00155:342:HHGFNDSXY:1:2675:25129:19335 2:N:0:GAACCTAG+TCGCATA  
TGTGCCGAGTTGGGTAGGTCAGGTGCCCTAGCACCTTCCTCCCCTTTCAACCATGCGTCCACCCCGGT  
TAATTTTGACCCGTGACGGTAATAACAATAGCTCGGTAAGCTTGGGTGAGTCAAAATCTAGTCTCGCTC  
+  
FFFFFFFFFFFFFFFFFFFFFFFFFFFFFFFFFFFFFFFFFFFFFFFFFFFFFFFFFFFFFFFFFFFFFFFFFFFF  
FFFFFFFFFFFFFFFFFFFFFFFFFFFFFFFFFFFFFFFFFFFFFFFFFFFFFFFFFFFFFFFFFFFFFFFFFFFF  
@A00155:342:HHGFNDSXY:1:1238:27832:7482 2:N:0:GAACCTAG+TCGCATA  
GTGCCGAGTTGGGTAGGTCAGGTGCCCTAGCACCTTCCTCCCCTTTCAACCATGCGTCCACCCCGTT  
AATTTTGACCCGTGACGGTAATAACAATAGCTCGGTAAGCTTGGGTGAGTCAAAATCTAGTCT  
+  
FFFFFFFFFFFFF:FFFFFFFFFFFFFFFFFFFFFFFFFFFF:FFFFFFFFFFFFFFFFFFFFFFFFFFFFFFFFFFFF  
FFFFFFFFFFFFFFFFFFFFFFFFFFFFFFFFFFFFFFFFFFFFFFFFFFFFFFFFFFFFFFFFFFFFFFFFFFFF:  
@A00155:342:HHGFNDSXY:1:2439:26576:15233 2:N:0:GAACCTAG+TCGCATA  
GTGCCGAGTTGGGTAGGTCAGGTGCCCTAGCACCTTCCTCCCCTTTCAACCATGCGTCCACCCCGTT

AATTTTGACCCGTGACAGTAATACAATAGCTCGGTAAGCTTGGGTGAGTCAAAATCTAGTCTCGCTCT  
+  
FFFFFFFFFFFFFFF:FF:FFFFFFFF:FFFFFFFF,FFFFFFFF:FF,FFFFFFFF:FFFFFFFF  
FFFF:FFFFFFFF:FFFFFFFFFFFF,FFFFFFFF:FFFFFFFFFFFFFFFFFFFFFFFF  
@A00155:342:HHGFNDSXY:1:2228:26503:23907 2:N:0:GAACCTAG+TCCGCATA  
GTGCCGAGTTGGGTAGGTCAGGTGCCCTAGCACCTTCCTCCCCTTTCAACCATGCGTCCACCCCGGTT  
AATTTTGACCCGTGACGTAATACAATAGCTCGGTAAGCTTGGGTGAGTCAAAATCTAGTCTCGCTCT  
+  
FFFFFFFFFFFFFFF:F,FFFFFF,FFF::FFF,FFFFFFFFFFFFFFF:F,F,FF,FF:FF,FFF  
FFFFFFFFFFFFFFF:FFFFFFFF:FFFFFFFFFFFFFFFFFFFFFFFFFFFFFFFF:FFFFFFFF:FFFFF  
@A00155:342:HHGFNDSXY:1:1355:18593:31845 2:N:0:GAACCTAG+TCCGCATA  
CGCCGAGTTGGGTAGGTCAGGTGCCCTAGCACCTTCCTCCCCTTTCAACCATGCGTCCACCCCGGTTA  
ATTTTGACCCGTGACGTAATACAATAGCTCGGTAAGCTTGGGTGAGTCAAAATCTAGTCTCG  
+  
FFFFFFFFFFFFFFF:FFFFFFFF,FFFFFFFFFFFFFFFFFFFFFFFF:FFFFFFFF  
FFFFFFFFFFFFFFFFFFFFFFFF:FFF:FFFFFFFF:FFFFFFFFFFFFFFFFFFFFFFFF:FF  
@A00155:342:HHGFNDSXY:1:1546:8269:24549 2:N:0:GAACCTAG+TCCGCATA  
CCGAGTTGGGTAGGTCAGGTGCCCTAGCACCTTCCTCCCCTTTCAACCATGCGTCCACCCCGGTTAAT  
TTTGACCCGTGACGTAATACAATAGCTCGGTAAGCTTGGGTGAGTCAAAATCTAGTCTCGCTCTAGA  
+  
FFFFFFFFFFFFFFF:FFFFFFFF:FFFFFFFFFFFFFFFFFFFFFFFF:FFFF  
F:FFFFFFFF:FFFFFFFFFFFFFFFFFFFFFFFFFFFFFFFF:FFFFFFFFFFFFFFFF  
@A00155:342:HHGFNDSXY:1:1139:5584:11193 2:N:0:GAACCTAG+TCCGCATA  
CCGAGTTGGGTAGGTCAGGTGCCCTAGCACCTTCCTCCCCTTTCAACCATGCGTCCACCCCGGTTAAT  
TTTGACCCGTGACGTAATACAATAGCTCGGTAAGCTTGGGTGAGTCAAAATCTAGTCTCGCTCTAGA  
+  
FFFFFFFFFFFFFFFFFFFFFFFFFFFFFFFFFFFFFFFF:FFFFFFFFFFFFFFFF  
FFFF:FFFFFFFF,FFFFFFFFFFFFFFFF:FFFFFFFFFFFFFFFF:FFFF  
@A00155:342:HHGFNDSXY:1:1115:11505:14403 2:N:0:GAACCTAG+TCCGCATA  
CCGAGTTGGGTAGGTCAGGTGCCCTAGCACCTTCCTCCCCTTTCAACCATGCGTCCACCCCGGTTAAT  
TTTGACCCGTGACGTAATACAATAGCTCGGTAAGCTTGGGTGAGTCAAAATCTAGTCTCGCTCTAGA  
+  
FFFFFFFFFFFFFFFFFFFFFFFF:FFFFFFFFFFFFFFFF:FFFFFFFF:FFFF  
FFFFFFFFFFFFFFFFFFFFFFFFFFFFFFFFFFFFFFFFFFFFFFFFFFFFFFFFFFFFFFFF  
@A00155:342:HHGFNDSXY:1:1330:2446:28557 2:N:0:GAACCTAG+TCCGCATA  
CGAGTTGGGTAGGTCAGGTGCCCTAGCACCTTCCTCCCCTTTCAACCATGCGTCCACCCCGGTTAATT  
TTGACCCGTGACGTAATACTATAGCTCGGTAAGCTTGGGTGAGTCAAAATCTAGTCTCGCTCTAGAC  
+  
FFFF:FFFFFFFFFFFFFFFF:FFFFFFF,FFFF:FFFF:FFFFFFFFFFFFFFFF  
FFFFFFFFFFFFFFFFFFFFFFFF:FFFFF,F,FFFFFFFFFFFFFFFFFFFFFFFF:FF,:F  
@A00155:342:HHGFNDSXY:1:1330:2944:26944 2:N:0:GAACCTAG+TCCGCATA  
CGAGTTGGGTAGGTCAGGTGCCCTAGCACCTTCCTCCCCTTTCAACCATGCGTCCACCCCGGTTAATT  
TTGACCCGTGACGTAATACTATAGCTCGGTAAGCTTGGGTGAGTCAAAATCTAGTCTCGCTCTAGAC  
+  
FFFFFFFFFFFFFFFFFFFFFFFFFFFFFFFFFFFFFFFF:FFFFF:FFFFFFFFFFFFFFFF  
FFFFFFFFFFFFFFFF:FFFFFFFFFFFFFFFFFFFFFFFF:FFF:FFFFFFFFFFFFFFFF  
@A00155:342:HHGFNDSXY:1:1116:29550:23484 1:N:0:GAACCTAG+TCCGCATA  
GAGTTGGGTAGGTCAGGTGCCCTAGCACCTTCCTCCCCTTTCAACCATGCGTCCACCCCGGTTAATTT  
TGACCCGTGACGTAATACAATAGCTCGGTAAGCTTGGGTGAGTCAAAATCTAGTCTCGCTCTAGACC  
+  
FFFFFFFFFFFFFFFFFFFFFFFFFFFFFFFFFFFFFFFFFFFFFFFFFFFFFFFFFFFFFFFF  
FFFFFFFFFFFFFFFFFFFFFFFFFFFFFFFF:FFF:FFFFFFFFFFFFFFFF:FFFFFFFF  
@A00155:342:HHGFNDSXY:1:2573:7283:18333 2:N:0:GAACCTAG+TCCGCATA  
AGTTGGGTAGGTCAGGTGCCCTAGCACCTTCCTCCCCTTTCAACCATGCGTCCACCCCGGTTAATTTT

GACCCGTGACGGTAATACAATAGCTCGGTAAGCTTGGGTGAGTCAAATCTAGTCTCGCTCTAGACCT  
+  
FFFFF,FFFFFFFFF:FFF,FFFFFFFFFFFFFFFFFFFFFFFF,FFFFFFFFFFFFFFFFF:FFF:FFF:F:F  
FFF:FFFFFFFFFFFFFFFFF:FFFFFFFFFFFFFFFFFFFFFFFF:FFFFFFFFFFFFFFFFFFFFFFFFF:F  
@A00155:342:HHGFNDSXY:1:1226:5367:24627 2:N:0:GAACCTAG+TCCGCATA  
AGTTGGGTAGGTCAGGTGCCCTAGCACCTTCCTCCCCTTTCAACCATGCGTCCACCCCGGTTAATTTT  
GACCCGTGACGGTAATACAATAGCTCGGTAAGCTTGGGTGAGTCAAATCTAGTCTCGCTCTAGACCT  
+  
FFFFF:FFFFFFFFFFFFFFFFFFFFFFFF,FFFFF:FFFFFFFFFFFFFFFFFFFFFFFFFFFFFFFFFFFFF  
F:FFFFFFFFFFFFFFFFFFFFFFFFFFFFFFFFFFFFFFFF:FFFFFFFFFFFFFFFFFFFFFFFFFFFFFFFFF  
@A00155:342:HHGFNDSXY:1:2236:27724:19006 2:N:0:GAACCTAG+TCCGCATA  
AGTTGGGTAGGTCAGGTGCCCTAGCACCTTCCTCCCCTTTCAACCATGCGTCCACCCCGGTTAATTTT  
GACCCGTGACGGTAATACAAAAGCTCGGTAAGCTTGGGTGAGTCAAATCTAGTCTCGCTCTAGACCT  
+  
F,FFFF:FFFFFFFFFFFFFFFFF:FFFF:F:FFFFFFFFFFFFFFFFFFFFFFFFFFFFFFFFFFFFFFFFF  
FFFFFFFFFFFFFFFFFFFFFFFFFFFFFFFFFFFFFFFF,FFFFFFFFFFFFFFFFFFFFFFFFFFFFFFFFF  
@A00155:342:HHGFNDSXY:1:1519:21468:28307 2:N:0:GAACCTAG+TCCGCATA  
AGTTGGGTAGGTCAGGTGCCCTAGCACCTTCCTCCCCTTTCAACCATGCGTCCACCCCGGTTAATTTT  
GACCCGTGACGGTAATACAATAGCTCGGTAAGCTTGGGTGAGTCAAATCTAGTCTCGCTCTAGACCT  
+  
FF:FFFFFFFFFFFFFFFFFFFFFFFF:FFFFFFFFFFFFFFFFF:FFFFFFFFFFFFFFFFFFFFFFFFFFFFF  
FFFFFFFFFFFFFFFFFFFFFFFF,FFFFFFFFFFFF:FFFFFFFFFFFFFFFFFFFFFFFFFFFFFFFFFFFFF  
@A00155:342:HHGFNDSXY:1:2236:27932:19272 2:N:0:GAACCTAG+TCCGCATA  
AGTTGGGTAGGTCAGGTGCCCTAGCACCTTCCTCCCCTTTCAACCATGCGTCCACCCCGGTTAATTTT  
GACCCGTGACGGTAATACAAAAGCTCGGTAAGCTTGGGTGAGTCAAATCTAGTCTCGCTCTAGACCT  
+  
FFFFFFFFFFFFFFFFFFFFF:FFFFFFFFFFFF:FF,FF:FFFFFFFFF:FFFF:FFFFFFFFF,FFFFFF:FF  
,::FFFFFF,:FFFFFF:FFFF,F:, :FFFFFFFFFFFFFFFFFFFFFFFFF::FFFFFFFFFFFF:FF  
@A00155:342:HHGFNDSXY:1:1519:21468:28307 1:N:0:GAACCTAG+TCCGCATA  
AGTTGGGTAGGTCAGGTGCCCTAGCACCTTCCTCCCCTTTCAACCATGCGTCCACCCCGGTTAATTTT  
GACCCGTGACGGTAATACAATAGCTCGGTAAGCTTGGGTGAGTCAAATCTAGTCTCGCTCTAGACCT  
+  
FFFFFFFFF:FFFFFFFFFFFFFFFFFFFFFFFFFFFFFFFFFFFFFFFFFFFFFFFFFFFFFFFFFFFFF:FFFFF  
F:FFFFFFFFFFFFFFFFFFFFFFFFFFFFFFFFFFFFFFFFFFFFFFFFFFFFFFFFFFFFFFFFF:FFFFFFFFFFFFF  
@A00155:342:HHGFNDSXY:1:2369:30789:9345 2:N:0:GAACCTAG+TCCGCATA  
AGTTGGGTAGGTCAGGTGCCCTAGCACCTTCCTCCCCTTTCAACCATGCGTCCACCCCGGTTAATTTT  
GACCCGTGACGGTAATACAATAGCTCGGTAAGCTTGGGTGAGTCAAATCTAGTCTCGCTCTAGACCT  
+  
FFFFFFFFFFFFFFFFFFFFFFFFFFFFFFFFFFFFFFFFFFFFFFFFFFFFFFFFFFFFFFFFF:FFFFFFFFF  
FFFFFFFFFFFFFFFFFFFFFFFFFFFFFFFFFFFFFFFFFFFFFFFFFFFFFFFFFFFFFFFFFFFFFFFFF  
@A00155:342:HHGFNDSXY:1:1658:16324:4742 1:N:0:GAACCTAG+TCCGCATA  
AGTTGGGTAGGTCAGGTGCCCTAGCACCTTCCTCCCCTTTCAACCATGCGTCCACCCCGGTTAATTTT  
GACCCGTGACGGTAATACAATAGCTCGGTAAGCTTGGGTGAGTCAAATCTAGTCTCGCTCTAGACCT  
+  
FFFFFFFFFFFFFFFFFFFFFFFFFFFFFFFFFFFFFFFF,FFFFFFFFFFFFFFFFFFFFFFFFFFFFFFFFFFFFF  
FFFFFFFFFFFFFFFFF:FFFFFFFFFFFFFFFFFFFFFFFFFFFFFFFFFFFFFFFFFFFFFFFFFFFFFFFFF  
@A00155:342:HHGFNDSXY:1:1226:22046:20165 2:N:0:GAACCTAG+TCCGCATA  
TGGGTAGGTCAGGTGCCCTAGCACCTTCCTCCCCTTTCAACCATGCGTCCACCCCGGTTAATTTTGAC  
CCGTGACGGTAATACAATAGCTCGGTAAGCTTGGGTGAGTCAAATCTAGTCTCGCTCTAGACCTTCT  
+  
FFFFFFFFFFFFFFFFFFFFF,FFFFFFFFFFFFFFFFFFFFFFFFFFFFFFFF,FFFFFFFFFFFFFFFFF:FFFFFFFFF  
FFFFFFFFFFFFF:FFF::F:FFFFFFFFFFFFFFFFFFFFFFFFFFFFFFFFF::FFFFFFFFFFFFFFFFFFFFF  
@A00155:342:HHGFNDSXY:1:1427:24514:29982 2:N:0:GAACCTAG+TCCGCATA  
TAGGTCAGGTGCCCTAGCACCTTCCTCCCCTTTCAACCATGCGTCCACCCCGGTTAATTTTGACCCGT

GACGGTAATACAATAGCTCGGTAAGCTTGGGTGAGTCAAAATCTAGTCTCGCTCTAGACCTTCTTGAC  
+  
FFFFFFFFFFFFFFFFFFFFFFFF,FFFFFFFFFFFFFFFF,FFFFFFFF,FFFFFF:FFFFFFFF  
FFFFFFFFFFFFFFFFFFFFFFFFFFFFFFFFFFFFFFFFFFFFFFFFFFFFFFFFFFFFFFFF  
@A00155:342:HHGFNDSXY:1:2540:2456:18239 1:N:0:GAACCTAG+TCCGCATA  
TAGGTCAGGTGCCCTAGCACCTTCCTCCCCTTTCAACCATGCGTCCACCCCGGTTAATTTTGACCCGT  
GACGGTAATACAATAGCTCGGTAAGCTTGGGTGAGTCAAAATCTAGTCTCGCTCTAGACCTTCTTGAC  
+  
FFFFFFFFFFFFFFFFFFFFFFFFFFFFFFFFFFFFFFFFFFFFFFFFFFFFFFFFFFFFFFFF  
FFFFFFFFFFFFFFFFFFFFFFFFFFFFFFFFFFFFFFFF:FFFFFFFFFFFFFFFFFFFFFFFF  
@A00155:342:HHGFNDSXY:1:1238:27832:7482 1:N:0:GAACCTAG+TCCGCATA  
GGTCAGGTGCCCTAGCACCTTCCTCCCCTTTCAACCATGCGTCCACCCCGGTTAATTTTGACCCGTGA  
CGGTAATACAATAGCTCGGTAAGCTTGGGTGAGTCAAAATCTAGTCTCGCTCTAGACCTTCT  
+  
FFFFFFFFFFFFFFFFFFFFFFFFFFFFFFFFFFFFFFFFFFFFFFFFFFFFFFFFFFFFFFFF  
FFFF:FFFFFFFFFFFFFFFF:FF:FFFFFFFFFFFFFFFFFFFFFFFFFFFFFFFF  
@A00155:342:HHGFNDSXY:1:2410:31602:13949 1:N:0:GAACCTAG+TCCGCATA  
GGTCAGGTGCCCTAGCACCTTCCTCCCCTTTCAACCATGCGTCCACCCCGGTTAATTTTGACCCGTGA  
CGGTAATACAATAGCTCGGTAAGCTTGGGTGAGTCAAAATCTAGTCTCGCTCTAGACCTTCTTGACCA  
+  
FFFFFFFFFFFFFFFFFFFF:FFFFFFFFFFFFFFFF:FFFFFFFFFFFFFFFFFFFFFFFF  
FFFF: :FFFFFFFFFFFFFFFFFFFFFFFFFFFFFFFFFFFFFFFF:FFF:FFFFFF:FFFFFFFF  
@A00155:342:HHGFNDSXY:1:2228:26503:23907 1:N:0:GAACCTAG+TCCGCATA  
GGTCAGGTGCCCTAGCACCTTCCTCCCCTTTCAACCATGCGTCCACCCCGGTTAATTTTGACCCGTGA  
CGGTAATACAATAGCTCGGTAAGCTTGGGTGAGTCAAAATCTAGTCTCGCTCTAGACCTTCTTGACCA  
+  
FFFFFFFF:FF:FF:FFF:::F,FFFFFFFFF::F:FF:FFFFFFFF:F,FFFF:FFF:F:FFF  
FFF:FFFFFFFF:::FF:FFFF:FFF,FFF:F:FFFF:FF,F:F:F,FF:F:FFFFFFFF:F,FF  
@A00155:342:HHGFNDSXY:1:1658:16324:4742 2:N:0:GAACCTAG+TCCGCATA  
GGTCAGGTGCCCTAGCACCTTCCTCCCCTTTCAACCATGCGTCCACCCCGGTTAATTTTGACCCGTGA  
CGGTAATACAATAGCTCGGTAAGCTTGGGTGAGTCAAAATCTAGTCTCGCTCTAGACCTTCTTGACCA  
+  
FFFFFFFFFFFF:FFFFFF:FFFFFFFFFFFFFFFFFFFFFFFFFFFFFFFFFFFFFFFF  
FFFFFFFFFFFF,FFFFFFFFFFFFFFFF:FFFFFFFFFFFFFFFFFFFFFFFFFFFFFFFF  
@A00155:342:HHGFNDSXY:1:1310:17879:26819 1:N:0:GAACCTAG+TCCGCATA  
GGTCAGGTGCCCTAGCACCTTCCTCCCCTTTCAACCATGCGTCCACCCCGGTTAATTTTGACCCGTGA  
CGGTAATACAATAGCTCGGTAAGCTTGGGTGAGTCAAAATCTAGTCTCGCTCTAGACCTTCTTGACCA  
+  
FFFFFFFFFFFFFFFFFFFFFFFFFFFFFFFFFFFFFFFFFFFFFFFFFFFFFFFFFFFFFFFF  
FFFFFFFFFFFFFFFFFFFFFFFFFFFFFFFFFFFFFFFFFFFFFFFFFFFFFFFFFFFFFFFF  
@A00155:342:HHGFNDSXY:1:2439:26576:15233 1:N:0:GAACCTAG+TCCGCATA  
GGTCAGGTGCCCTAGCACCTTCCTCCCCTTTCAACCATGCGTCCACCCCGGTTAATTTTGACCCGTGA  
CAGTAATACAATAGCTCGGTAAGCTTGGGTGAGTCAAAATCTAGTCTCGCTCTAGACCTTCTTGACCA  
+  
FFFFFFFFFFFFFFFFFFFF, :FFFFFFFFFFFFFFFFFFFFFFFFFFFFFFFFFFFFFFFF  
FFFFFFFFFFFFFFFFFFFFFFFFFFFFFFFFFFFFFFFFFFFFFFFFFFFFFFFFFFFFFFFF  
@A00155:342:HHGFNDSXY:1:2275:29993:12195 1:N:0:GAACCTAG+TCCGCATA  
GGTCAGGTGCCCTAGCACCTTCCTCCCCTTTCAACCATGCGTCCACCCCGGTTAATTTTGACCCGTGA  
CGGTAATACAATAGCTCGGTAAGCTTGGGTGAGTCAAAATCTAGTCTCGCTCTAGACCTTCTTGACCA  
+  
FFFFFFFFFFFFFFFFFFFFFFFFFFFFFFFFFFFFFFFFFFFFFFFFFFFFFFFFFFFFFFFF  
FFFFFFFFFFFFFFFFFFFFFFFFFFFFFFFFFFFFFFFFFFFFFFFFFFFFFFFFFFFFFFFF  
@A00155:342:HHGFNDSXY:1:2566:13096:16814 1:N:0:GAACCTAG+TCCGCATA  
GGTCAGGTGCCCTAGCACCTTCCTCCCCTTTCAACCATGCGTCCACCCCGGTTAATTTTGACCCGTGA

CGGTAATACAATAGCTCGGTAAGCTTGGGTGAGTCAAAATCTAGTCTCGCTCTAGACCTTCTTGACCA  
+  
FFFFFFFFFFFFFFFFFFFFFFFFFFFFFFFFFFFFFFFFFFFFFFFFFFFFFFFFFFFFFFFFFFFFFFFF  
FFFFFFFFFFFFFFFFFFFFFFFFFFFFFFFFFFFFFFFFFFFFFFFFFFFFFFFFFFFFFFFFFFFFFFFF:FFFFFFFF  
@A00155:342:HHGFNDSXY:1:2461:11912:18834 1:N:0:GAACCTAG+TCCGCATA  
GGTCAGGTGCCCTAGCACCTTCCTCCCCTTTCAACCATGCGTCCACCCCGGTTAATTTTGACCCGTGA  
CGGTAATACAATAGCTCGGTAAGCTTGGGTGAGTCAAAATCTAGTCTCGCTCTAGACCTTCTTGACCA  
+  
FFFFFFFFFFFFFFFFFFFFFFFFFFFFFFFFFFFFFFFFFFFFFFFFFFFFFFFFFFFFFFFFFFFFFFFF  
,FFFFFFFFFFFFFFFFFFFFFFFFFFFFFFFFFFFFFFFFFFFFFFFFFFFFFFFFFFFFFFFFFFFFFFFF,FFFFFFFFFFFFFFFFFFFFFFFF:FFFFFFFF  
@A00155:342:HHGFNDSXY:1:2461:11803:19022 1:N:0:GAACCTAG+TCCGCATA  
GGTCAGGTGCCCTAGCACCTTCCTCCCCTTTCAACCATGCGTCCACCCCGGTTAATTTTGACCCGTGA  
CGGTAATACAATAGCTCGGTAAGCTTGGGTGAGTCAAAATCTAGTCTCGCTCTAGACCTTCTTGACCA  
+  
FFFFFFFFFFFFFFFFFFFFFFFFFFFFFFFFFFFFFFFFFFFFFFFFFFFFFFFFFFFFFFFFFFFFFFFF  
FFFFFFFFFFFFFFFFFFFFFFFFFFFFFFFFFFFFFFFFFFFFFFFFFFFFFFFFFFFFFFFFFFFFFFFF,FFFFFFFFFFFFFFFFFFFFFFFFFFFFFFFFFFFFFFFF  
@A00155:342:HHGFNDSXY:1:1252:13955:8281 1:N:0:GAACCTAG+TCCGCATA  
GGTCAGGTGCCCTAGCACCTTCCTCCCCTTTCAACCATGCGTCCACCCCGGTTAATTTTGACCCGTGA  
CGGTAATACAATAGCTCGGTAAGCTTGGGTGAGTCAAAATCTAGTCTCGCTCTAGACCTTCTTGACCA  
+  
FFFF:FFFFFFFFFFFFFFFFFFFFFFFFFFFFFFFFFFFFFFFFFFFFFFFFFFFFFFFFFFFFFFFFFFFF  
FFFFFFFFFFFFFFFFFFFFFFFFFFFFFFFFFFFFFFFFFFFFFFFFFFFFFFFFFFFFFFFFFFFFFFFF,FFFFFFFFFFFFFFFFFFFFFFFFFFFFFFFFFFFFFFFF  
@A00155:342:HHGFNDSXY:1:1355:18593:31845 1:N:0:GAACCTAG+TCCGCATA  
GTCAGGTGCCCTAGCACCTTCCTCCCCTTTCAACCATGCGTCCACCCCGGTTAATTTTGACCCGTGAC  
GGTAATACAATAGCTCGGTAAGCTTGGGTGAGTCAAAATCTAGTCTCGCTCTAGACCTTCTTG  
+  
FFFFFFFFFFFFFFFFFFFF:FF,FFFFFFFFFFFFFFFFFFFF,FFFFFFFFFFFFFFFFFFFFFFFFFFFFFFFFFFFFFFFFFFFFFFFFFFFFFFFFFFFFFFFF  
FFFFFFFFFFFFFFFFFFFFFFFFFFFFFFFFFFFFFFFFFFFFFFFFFFFFFFFFFFFFFFFFFFFFFFFF:FFFFFF:FFFFFFFFFFFFFFFFFFFFFFFFFFFFFFFF  
@A00155:342:HHGFNDSXY:1:1507:2935:1720 1:N:0:GAACCTAG+TCCGCATA  
GTCAGGTGCCCTAGCACCTTCCTCCCCTTTCAACCATGCGTCCACCCCGGTTAATTTTGACCCGTGAC  
GGTAATACAATAGCTCGGTAAGCTTGGGTGAGTCAAAATCTAGTCTCGCTCTAGACCTTCTTGACCA  
+  
FFFFFFFFFFFFFFFFFFFF,FFFFFF:,FFFFFFFFFFFFFFFFFFFF::FFF,,FFFFFF::FF,FFFFFFFFFFFFFFFFFFFF:FFFFFF  
FFF:FFFFFFFFFFFFFFFFFFFF:FFF:FFFFFFFFFFFFFFFFFFFFFFFFFFFFFFFFFFFFFFFFFFFFFFFFFFFFFFFFFFFFFFFFFFFFFFFFFFFFFFFF  
@A00155:342:HHGFNDSXY:1:1550:31286:18129 1:N:0:GAACCTAG+TCCGCATA  
GTCAGGTGCCCTAGCACCTTCCTCCCCTTTCAACCATGCGTCCACCCCGGTTAATTTTGACCCGTGAC  
GGTAATACAATAGCTCGGTAAGCTTGGGTGAGTCAAAATCTAGTCTCGCTCTAGACCTTCTTGACCAT  
+  
FFFFFFFFFFFFFFFFFFFFFFFFFFFFFFFFFFFFFFFFFFFFFFFFFFFFFFFFFFFFFFFFFFFFFFFF:FFFFFFFFFFFFFFFFFFFFFFFFFFFFFFFF  
FFFFFFFFFFFFFFFFFFFFFFFFFFFFFFFFFFFF:,FFFFFFFFFFFFFFFFFFFFFFFFFFFFFFFFFFFFFFFFFFFFFFFFFFFFFFFFFFFFFFFFFFFFFFFF:FFFF:FFFFFF  
@A00155:342:HHGFNDSXY:1:1546:8269:24549 1:N:0:GAACCTAG+TCCGCATA  
GTCAGGTGCCCTAGCACCTTCCTCCCCTTTCAACCATGCGTCCACCCCGGTTAATTTTGACCCGTGAC  
GGTAATACAATAGCTCGGTAAGCTTGGGTGAGTCAAAATCTAGTCTCGCTCTAGACCTTCTTGACCAT  
+  
FFFFFFFFFFFFFFFFFFFF:FFF:F,FFFFFFFFFFFFFFFFFFFFFFFFFFFFFFFFFFFFFFFFFFFFFFFFFFFFFFFFFFFFFFFFFFFFFFFFFFFFFFFF  
FFFFFFFFFFFFFFFFFFFF:FFFFFFFFFFFFFFFFFFFF:FFFFFFFFFFFFFFFFFFFFFFFFFFFFFFFFFFFFFFFFFFFFFFFFFFFFFFFFFFFFFFFFFFFFFFFF  
@A00155:342:HHGFNDSXY:1:1507:2944:1892 1:N:0:GAACCTAG+TCCGCATA  
GTCAGGTGCCCTAGCACCTTCCTCCCCTTTCAACCATGCGTCCACCCCGGTTAATTTTGACCCGTGAC  
GGTAATACAATAGCTCGGTAAGCTTGGGTGAGTCAAAATCTAGTCTCGCTCTAGACCTTCTTGACCAT  
+  
FFFFFFFFFFFFFFFFFFFF:FFFFFFFFFFFF,FFFFFF:FFF:FFFFFFFFFFFF:FF,FFFFFFFFFFFFFFFFFFFFFFFFFFFFFFFFFFFFFFFF  
FFFFFFFFFFFFFFFFFFFFFFFFFFFFFFFFFFFFFFFFFFFF:FFFFFFFFFFFFFFFFFFFF:FFFFFFFFFFFFFFFFFFFFFFFFFFFFFFFFFFFFFFFFFFFF  
@A00155:342:HHGFNDSXY:1:1550:28339:12211 1:N:0:GAACCTAG+TCCGCATA  
GTCAGGTGCCCTAGCACCTTCCTCCCCTTTCAACCATGCGTCCACCCCGGTTAATTTTGACCCGTGAC

GGTAATACAATAGCTCGGTAAGCTTGGGTGAGTCAAAATCTAGTCTCGCTCTAGACCTTCTTGACCAT  
+  
FFFFFFFFFFFFFFFFFFFFFFFFFFFFFFFFFFFFFFFFFFFFFFFFFFFFFFFFFFFFFFFFFFFFFFFF  
FF,FFFFFFFFFFFFFFFFFFFFFFFFFFFFFFFFFFFFFFFFFFFFFFFFFFFFFFFFFFFFFFFFFFFF  
@A00155:342:HHGFNDSXY:1:2369:30789:9345 1:N:0:GAACCTAG+TCCGCATA  
TCAGGTGCCCTAGCACCTTCCTCCCCTTTCAACCATGCGTCCACCCCGGTTAATTTTGACCCGTGACG  
GTAATACAATAGCTCGGTAAGCTTGGGTGAGTCAAAATCTAGTCTCGCTCTAGACCTTCTTGACCATC  
+  
FFFFFFFFFFFFFFFFFFFFFFFFFFFFFFFFFFFFFFFFFFFFFFFFFFFFFFFFFFFFFFFFFFFFFFFF  
FFFFFFFFFFFFFFFFFFFFFFFFFFFFFFFFFFFFFFFFFFFFFFFFFFFFFFFFFFFFFFFFFFFFFFFF  
@A00155:342:HHGFNDSXY:1:2569:29460:5165 1:N:0:GAACCTAG+TCCGCATA  
TCAGGTGCCCTAGCACCTTCCTCCCCTTTCAACCATGCGTCCACCCCGGTTAATTTTGACCCGTGACG  
GTAATACAATAGCTCGGTAAGCTTGGGTGAGTCAAAATCTAGTCTCGCTCTAGACCTTCTTGACCATC  
+  
FFFFFFFFFFFFFFFFFFFFFFFFFFFFFFFFFFFFFFFFFFFFFFFFFFFFFFFFFFFFFFFFFFFFFFFF  
FFFFFFFFF:FFFFFFFFFFFFFFFFFFFFFFFFFFFFFFFFFFFFFFFFFFFFFFFFFFFFFFFFFFFFFFF  
@A00155:342:HHGFNDSXY:1:1514:24876:4899 1:N:0:GAACCTAG+TCCGCATA  
TCAGGTGCCCTAGCACCTTCCTCCCCTTTCAACCATGCGTCCACCCCGGTTAATTTTGACCCGTGACG  
GTAATACAATAGCTCGGTAAGCTTGGGTGAGTCAAAATCTAGTCTCGCTCTAGACCTTCTTGACCATC  
+  
FFFFFFFFFFFFFFFFFFFFFFFFFFFFFFFFFFFFFFFFFFFFFFFFFFFFFFFFFFFFFFFFFFFFFFFF  
FFF:FFFFFFFFFFFFFFFFFFFFFFFFFFFFFFFFFFFFFFFFFFFFFFFFFFFFFFFFFFFFFFFFFFFF,F  
@A00155:342:HHGFNDSXY:1:2465:14977:36166 1:N:0:GAACCTAG+TCCGCATA  
TCAGGTGCCCTAGCACCTTCCTCCCCTTTCAACCATGCGTCCACCCCGGTTAATTTTGACCCGTGACG  
GTAATACAATAGCTCGGTAAGCTTGGGTGAGTCAAAATCTAGTCTCGCTCTAGACCTTCTTGACCATC  
+  
FFFFFFFFFFFFFFFFFFFFFFFFFFFFFFFFFFFFFFFFFFFFFFFFFFFFFFFFFFFFFFFFFFFFFFFF  
FFFFFFFFFFFFFFFFFFFFFFFFFFFFFFFFFFFFFFFFFFFFFFFFFFFFFFFFFFFFFFFFFFFFFFFF  
@A00155:342:HHGFNDSXY:1:1169:9480:30749 1:N:0:GAACCTAG+TCCGCATA  
TCAGGTGCCCTAGCACCTTCCTCCCCTTTCAACCATGCGTCCACCCCGGTTAATTTTGACCCGTGACG  
GTAATACAATAGCTCGGTAAGCTTGGGTGAGTCAAAATCTAGTCTCGCTCTAGACCTTCTTGACCATC  
+  
FFFFFFFFFFFFFFFFF:FFFFFFFFFFFFFFFFFFFFFFFFFFFFFFFFFFFFFFFFFFFFFFFFFFFFFFF  
FFFFFFFFFFFFFFFFF:FFFFFFFFFFFFFFFFFFFFFFFFFFFFFFFFFFFFFFFFFFFFFFFFFFFFFFF  
@A00155:342:HHGFNDSXY:1:2556:6497:19257 2:N:0:GAACCTAG+TCCGCATA  
TGCCCTAGCACCTTCCTCCCCTTTCAACCATGCGTCCACCCCGGTTAATTTTGACCCGTGACGGTAAT  
ACAATAGCTCGGTAAGCTTGGGTGAGTCAAAATCTAGTCTCGCTCTAGACCTTCTTGACCATCTGG  
+  
FFFF:FFFF:FFFFFFFFFFFFF,F,FFFFFFFFFFFFFFFFFFFF:F,FFFFFFFFFFFFFFFFFFFF,FFFFFFF  
FFFFF:FFFFFFFFFFFFF,FFFFF:FFFFFFFFFFFFFFFFFFFFF:FFFFFFFFFFFFFFFFFFFF,FFFFFFFFF  
@A00155:342:HHGFNDSXY:1:1565:22209:16157 2:N:0:GAACCTAG+TCCGCATA  
TGCCCTAGCACCTTCCTCCCCTTTCAACCATGCGTCCACCCCGGTTAATTTTGACCCGTGACGGTAAT  
ACAATAGCTCGGTAAGCTTGGGTGAGTCAAAATCTAGTCTCGCTCTAGACCTTCTTGACCATCTGGCA  
+  
FFFFFFFFFFFFFFF:FFFFFFFFFFFFFFFFFFFFFFFFFFFFFFFFFFFFFFFFFFFFFFFFFFFFFFF:FFFFFFFFFFFFFFFFFFFF  
FFFF: :FFFFFFFFFFFFFFFFFFFFFFFFFFFFFFFFFFFFFFFFFFFFFFFFFFFFFFFFFFFFFFFFFFFF  
@A00155:342:HHGFNDSXY:1:2420:32850:2988 2:N:0:GAACCTAG+TCCGCATA  
TGCCCTAGCACCTTCCTCCCCTTTCAACCATGCGTCCACCCCGGTTAATTTTGACCCGTGACGGTAAT  
ACAATAGCTCGGTAAGCTTGGGTGAGTCAAAATCTAGTCTCGCTCTAGACCTTCTTGACCATCTGGCA  
+  
FFFFFFF:FF: :FF:FFFFFFFFFFFFFFFFFFFFFFFFFFFFF,FFFFFFF:F:FFF: :FFFFFFFFF:FFFFFFFFF  
FF:F:F:FFFF:FFFFFFFFF:F:FF:FFFFFFFFFFFFFFFFFFFF:FF,FFFFFFF:FFFFFFFFFFFFFFFFFFFF  
@A00155:342:HHGFNDSXY:1:1565:22110:15546 2:N:0:GAACCTAG+TCCGCATA  
GCCCTAGCACCTTCCTCCCCTTTCAACCATGCGTCCACCCCGGTTAATTTTGACCCGTGACGGTAATA

CAATAGCTCGGTAAGCTTGGGTGAGTCAAAATCTAGTCTCGCTCTAGACCTTCTTGACCATCTGGCA  
+  
FFFF,FFFFFFFFFFFFFFFFFFFFFFFF:FFFFFFFFFFFFFFFFFFFFFFFFFFFFFFFFFFFF  
FFFFFFFFFFFF:FFFFFFFFFFFFFFFFFFFFFFFF:FFFFFFFFFFFFFFFFFFFFFFFFFFFFFFFF  
@A00155:342:HHGFNDSXY:1:1375:25527:14074 2:N:0:GAACCTAG+TCCGCATA  
CCCTAGCACCTTCTCCCCTTTCAACCATGCGTCCACCCCGTTAATTTTGACCCGTGACGGTAATAC  
AATAGCTCGGTAAGCTTGGGTGAGTCAAAATCTAGTCTCGCTCTAGACCTTCTTGACCATCTGGCAGT  
+  
FFFFFFFFFFFF:FFFFFFFFFFFFFFFFFFFFFFFFFFFFFFFFFFFFFFFFFFFFFFFFFFFFFFFFFFFF  
FFFFFFFFFFFFFFFFFFFFFFFFFFFFFFFFFFFFFFFFFFFFFFFFFFFFFFFFFFFFFFFF:FFFFFFFFFFFFF  
@A00155:342:HHGFNDSXY:1:2140:1542:8077 2:N:0:GAACCTAG+TCCGCATA  
CCCTAGCACCTTCTCCCCTTTCAACCATGCGTCCACCCCGTTAATTTTGACCCGTGACGGTAATAC  
AATAGCTCGGTAAGCTTGGGTGAGTCAAAATCTAGTCTCGCTCTAGACCTTCTTGACCATCTGGCAGT  
+  
FF:FF:FF:FFF,FFFF:FFFFFFFFFFFFFFFFFFFFFFFF:FFF::FFF,,FFFFFFFFFFFF,FFFFFFF  
FFFFFFFFFFFFFFFFFFFFFFFF,FFF:FFFFFFFFFFFFFFFFFFFFFFFF:FFFFFFFFFFFFFFFFFFFFF  
@A00155:342:HHGFNDSXY:1:2117:1434:11459 2:N:0:GAACCTAG+TCCGCATA  
CCCTAGCACCTTCTCCCCTTTCAACCATGCGTCCACCCCGTTAATTTTGACCCGTGACGGTAATAC  
AATAGCTCGGTAAGCTTGGGTGAGTCAAAATCTAGTCTCGCTCTAGACCTTCTTGACCATCTGGCAGT  
+  
FFFFF:FFFFFFFFFFFF:FF,FF:FFFF::F:FFFFFFFF::FFFF:,FFFFFFFFFFFF:FFF:FF  
FFFFFFFF:FF:F:FFFFFFFF:FFF:FFFFFFFF:FFFFFFFFFFFFFFFF:FFFFFFFFFFFFFFFF:F  
@A00155:342:HHGFNDSXY:1:2234:10411:16611 2:N:0:GAACCTAG+TCCGCATA  
CCCTAGCACCTTCTCCCCTTTCAACCATGCGTCCACCCCGTTAATTTTGACCCGTGACGGTAATAC  
AATAGCTCGGTAAGCTTGGGTGAGTCAAAATCTAGTCTCGCTCTAGACCTTCTTGACCATCTGGCAGT  
+  
FFFFFFFFFFFFFFFF:F:FFFFFFFFFFFFFFFFFFFFFFFFFFFFFFFFFFFFFFFFFFFFFFFFFFFFF  
,FFFFFFFFFFFFFFFF:FFFFFFFFFFFFFFFFFFFFFFFFFFFFFFFFFFFFFFFFFFFFFFFFFFFFF  
@A00155:342:HHGFNDSXY:1:1167:7328:15562 2:N:0:GAACCTAG+TCCGCATA  
CCTAGCACCTTCTCCCCTTTCAACCATGCGTCCACCCCGTTAATTTTGACCCGTGACGGTAATACA  
ATAGCTCGGTAAGCTTGGGTGAGTCAAAATCTAGTCTCGCTCTAGACCTTCTTGACCATCTGGCAGTC  
+  
FFFFFFFFFFFFFFFF:FFFFFFFFFFFFFFFFFFFFFFFFFFFFFFFF:FFFFFFFFFFFFFFFFFFFFFFFF  
FFFFFFFFFFFFFFFFFFFFFFFFFFFFFFFFFFFFFFFFFFFFFFFF:FFFFFFFFFFFFFFFFFFFFFFFF  
@A00155:342:HHGFNDSXY:1:1128:6307:26725 2:N:0:GAACCTAG+TCCGCATA  
CTAGCACCTTCTCCCCTTTCAACCATGCGTCCACCCCGTTAATTTTGACCCGTGACGGTAATACAA  
TAGCTCGGTAAGCTTGGGTGAGTCAAAATCTAGTCTCGCTCTAGACCTTCTTGACCATCTGGCAGTCA  
+  
FFFF:FF:FFFFFFFFFFFFFFFF:FFFFFFFFFFFF:FFFFFFFFF,:FFFFFFFFFFFFFFFFFFFFF  
FFFFFFFF:FFFFFFFFF:FFFFFFFFFFFFFFFFFFFFFFFFFFFFFFFFFFFFFFFFFFFFFFFFFFFFF  
@A00155:342:HHGFNDSXY:1:1128:5728:26819 2:N:0:GAACCTAG+TCCGCATA  
CTAGCACCTTCTCCCCTTTCAACCATGCGTCCACCCCGTTAATTTTGACCCGTGACGGTAATACAA  
TAGCTCGGTAAGCTTGGGTGAGTCAAAATCTAGTCTCGCTCTAGACCTTCTTGACCATCTGGCAGTCA  
+  
FFFFFFFFFFFFFFFFFFFFFFFF:FFFFFFFFFFFFFFFFFFFFFFFFFFFF,FFFF:FFFFFFFFFFFFFFFF  
FFFFFFFFFFFFFFFFFFFFFFFFFFFFFFFFFFFFFFFFFFFF,FFFFFFFFFFFFFFFF:FFFFFFFFF  
@A00155:342:HHGFNDSXY:1:1225:9019:12602 2:N:0:GAACCTAG+TCCGCATA  
CTAGCACCTTCTCCCCTTTCAACCATGCGTCCACCCCGTTAATTTTGACCCGTGACGGTAATACAA  
TAGCTCGGTAAGCTTGGGTGAGTCAAAATCTAGTCTCGCTCTAGACCTTCTTGACCATCTGGCAGTCA  
+  
FFFFFFFFF:FFFFFFFFF::FFFFFFFFFFFFFFFFFFFFFFFFF:F,:F:FFFFFFFFFFFFFFFF:FFFF  
::FFFFFFFFFFFF,FFFFFFFFFFFFFFFFFFFF,FFFFFFFFF,FFFFFFFFFFFFFFFFFFFFFFFF  
@A00155:342:HHGFNDSXY:1:2441:23294:20572 2:N:0:GAACCTAG+TCCGCATA  
CTAGCACCTTCTCCCCTTTCAACCATGCGTCCACCCCGTTAATTTTGACCCGTGACGGTAATACAA



TAGCTCGGTAAGCTTGGGTGAGTCAAAATCTAGTCTCGCTCTAGACCTTCTTGACCATCTGGCAGTCA  
+  
FFFFFFFFFFFFFFFF,FFFFFFFF:FFF:FFFFFFFF,FF,F,FFFF:FFFF:F,FFFFFF:FFFFFFF:  
FFFFFFFF:FFFFFF:FFFFFFFFFFFFFFFFFFFFFFFFFFFFFFFF,FFFFFF::FFFFFFFFF:FFFFFFF  
@A00155:342:HHGFNDSXY:1:1523:3278:10457 2:N:0:GAACCTAG+TCCGCATA  
CTAGCACCTTCTCCCCTTTCAACCATGCGTCCACCCCGGTTAATTTTGACCCGTGACGGTAATACAA  
TAGCTCGGTAAGCTTGGGTGAGTCAAAATCTAGTCTCGCTCTAGACCTTCTTGACCATCTGGCAGTCA  
+  
FFFFFFFF,FFFFFFFFFFFFFFFFFFFFFFFFFFFFFFFFFFFFFFFF:FFFFFFFFFFFFFFFFFFFFFF:F  
FFFFFFFFFFFFFFFFFFFFFFFFFFFFFF::FFFFFFFFFFFFFFFFFFFFFFFFFFFFFFFFFFFFFFFFF  
@A00155:342:HHGFNDSXY:1:1473:13395:1799 2:N:0:GAACCTAG+TCCGCATA  
CTAGCACCTTCTCCCCTTTCAACCATGCGTCCACCCCGGTTAATTTTGACCCGTGACGGTAATACAA  
TAGCTCGGTAAGCTTGGGTGAGTCAAAATCTAGTCTCGCTCTAGACCTTCTTGACCATCTGGCAGTCA  
+  
FFFFFFFFFFFFFFFFFFFFFF:FFFFFFFF:FFFFFFFFFFFFFFFFFFFFFFFFFFFFFFFFFFFFFF:FFFFFFFFF  
FFFFFFFFFFFFFFFFFFFFFFFFFFFFFFFFFFFFFF:FFF,FFFFFFFFFFFFFFFFFFFFFFFFFFFFFFFFF  
@A00155:342:HHGFNDSXY:1:2338:13892:3599 2:N:0:GAACCTAG+TCCGCATA  
CTAGCACCTTCTCCCCTTTCAACCATGCGTCCACCCCGGTTAATTTTGACCCGTGACGGTAATACAA  
TAGCTCGGTAAGCTTGGGTGAGTCAAAATCTAGTCTCGCTCTAGACCTTCTTGACCATCTGGCAGTCA  
+  
F:FFFFFFFFFFFFFFFF:FF:FFFFFFFFFFFFFFFFFFFFFFFFFFFFFFFFFFFFFFFFFFFFFFFFFFFFF  
,FFFFFFFFFFFFFFFFFFFFFFFFFFFFFFFFFFFFFFFFFFFFFFFFFFFFFFFFFFFFFFFFFFFFFFFFF  
@A00155:342:HHGFNDSXY:1:1525:2347:26381 2:N:0:GAACCTAG+TCCGCATA  
CTAGCACCTTCTCCCCTTTCAACCATGCGTCCACCCCGGTTAATTTTGACCCGTGACGGTAATACAA  
TAGCTCGGTAAGCTTGGGTGAGTCAAAATCTAGTCTCGCTCTAGACCTTCTTGACCATCTGGCAGTCA  
+  
FF:FFFFFFFFFFFFFF,FF,:FFF:FFFFFFFFFFFFFFFF:FFFFFFFFFFFFFFFFFFFFFFFFFFFFF  
FFFFFFFFFFFF,FFFFFF:FFFFFFFFFFFFFFFFFFFFFF:FFFFFFFFFFFFFFFFFFFFFF,F:FFFFFFF  
@A00155:342:HHGFNDSXY:1:1112:12500:1344 2:N:0:GAACCTAG+TCCGCATA  
GCACCTTCCTCCCCTTTCAACCATGCGTCCACCCCGGTTAATTTTGACCCGTGACGGTAATACAATAG  
CTCGGTAAGCTTGGGTGAGTCAAAATCTAGTCTCGCTCTAGACCTTCTTGACCATCTGGCAGTCAGCA  
+  
FFFFFFFFF:FFFFFFFFFFFFFFFFFFFFFFFFFFFFFFFFFFFFFFFFFFFFFFFFFFFFFFFFFFFFFFF  
FFFFFFFFFFFFFFFFFFFFFFFFFFFFFFFFFFFFFFFFFFFFFFFFFFFFFFFFFFFFFFFFFFFFFF::FFFFFFFFF  
@A00155:342:HHGFNDSXY:1:1544:29206:26490 2:N:0:GAACCTAG+TCCGCATA  
GCACCTTCCTCCCCTTTCAACCATGCGTCCACCCCGGTTAATTTTGACCCGTGACGGTAATACAATAG  
CTCGGTAAGCTTGGGTGAGTCAAAATCTAGTCTCGCTCTAGACCTTCTTGACCATCTGGCAGTCAGCA  
+  
FFFFFFFFFFFFFFFFFFFFFFFFFFFFFFFFFFFFFFFFFFFFFFFFFFFFFFFFFFFFFFFFFFFFFFFFF  
FFFFFFFFFFFFFFFFFFFFFFFFFFFFFFFFFFFFFFFFFFFFFFFFFFFFFFFFFFFFFFFFFFFFFFFFF  
@A00155:342:HHGFNDSXY:1:1330:2944:26944 1:N:0:GAACCTAG+TCCGCATA  
CTTCCTCCCCTTTCAACCATGCGTCCACCCCGGTTAATTTTGACCCGTGACGGTAATACTATAGCTCG  
GTAAGCTTGGGTGAGTCAAAATCTAGTCTCGCTCTAGACCTTCTTGACCATCTGGCAGTCAGCATAAG  
+  
FFFFFFFFFFFFFFFFFFFFFF:FFFFFFFFF:FFFFFFFFFFFFFFFFFFFFFFFFFFFFFFFFFFFFFFFFF  
FFFFFFFFFFFF:FFFFFFFFFFFFFFFFFFFFFFFFFFFFFFFFFFFFFFFFFFFFFFFFFFFFFFFFFFFFF  
@A00155:342:HHGFNDSXY:1:1330:2446:28557 1:N:0:GAACCTAG+TCCGCATA  
CTTCCTCCCCTTTCAACCATGCGTCCACCCCGGTTAATTTTGACCCGTGACGGTAATACTATAGCTCG  
GTAAGCTTGGGTGAGTCAAAATCTAGTCTCGCTCTAGACCTTCTTGACCATCTGGCAGTCAGCATAAG  
+  
FFFFF,F:,FFF:FFF,FFFF:FFF:FFFF,:FFFF:F,FFFFFFFFF,,F,FFFF,FFFFFFF  
FF,FFFFFFFF:FFF,F,FFFFFFFFF,FFFFFFFFF,FFFFFFFF:FFFF,F,FFFF::FFFFF  
@A00155:342:HHGFNDSXY:1:2554:20799:25081 2:N:0:GAACCTAG+TCCGCATA  
CTCCCCTTTCAACCATGCGTCCACCCCGGTTAATTTTGACCCGTGACGGTAATACAATAGCTCGGTAA

GCTTGGGTGAGTCAAAATCTAGTCTCGCTCTAGACCTTCTTGACCATCTGGCAGTCAGCATA  
+  
FFFFFFFFFFFFFFFF:FFFFFFFFFFFFFFFF:FFFFFFFFFFFFFFFFFFFFFFFFFFFFFFFF  
FFFFFFFFFFFFFFFFFFFFFFFFFFFFFFFFFFFFFFFFFFFFFFFFFFFFFFFFFFFFFFFF  
@A00155:342:HHGFNDSXY:1:1252:13955:8281 2:N:0:GAACCTAG+TCCGCATA  
CTCCCCCTTTCAACCATGCGTCCACCCCGGTTAATTTTGACCCGTGACGGTAATACAATAGCTCGGTAA  
GCTTGGGTGAGTCAAAATCTAGTCTCGCTCTAGACCTTCTTGACCATCTGGCAGTCAGCATAAGGACG  
+  
FFFFFFFFFFFFFFFFFFFFFFFFFFFFFFFFFFFFFFFFFFFFFFFFFFFFFFFFFFFFFFFF,FFFFFFFF  
FFFFFFFFFFFFFFFFFFFFFFFFFFFFFFFF:FFFFFFFF:FFFFFFFFFFFFFFFFFFFFFFFF:FFFF  
@A00155:342:HHGFNDSXY:1:2222:28700:1752 2:N:0:GAACCTAG+TCCGCATA  
CCCCTTTCAACCATGCGTCCACCCCGGTTAATTTTGACCCGTGACGGTAATACAATAGCTCGGTAAGC  
TTGGGTGAGTCAAAATCTAGTCTCGCTCTAGACCTTCTTGACCATCTGGCAGTCAGCATA  
+  
FFFFFFFF,FF:FFFFFFFFFFFFFFFFFFFFFFFF:FFFFFFFFFFFFFFFF:F:F,FFFF:FFFFFF  
FFFF:FFFF:.:FFFFFFFFFFFFFFFFFFFFFFFFFFFFFFFFFFFFFFFF:FFFFF  
@A00155:342:HHGFNDSXY:1:2674:6334:11146 2:N:0:GAACCTAG+TCCGCATA  
CCCCTTTCAACCATGCGTCCACCCCGGTTACTTTTGACCCGTGACGGTAATACAATAGCTCGGTAAGC  
TTGGGTGAGTCAAAATCTAGTCTCGCTCTAGACCTTCTTGACCATCTGGCAGTCAGCATA  
+  
FFFFF:FFF,FF,,FFFFFFFFFFFFFFFF:F,:FFFFFFFFFFFFFFFF:F::F:FFFFFFFF:F  
F:F:FFF:FFFFFFFF:FFFFFF:FFFF:FFFFFFFF:FFF:FFFFFFFF  
@A00155:342:HHGFNDSXY:1:1644:14931:3270 2:N:0:GAACCTAG+TCCGCATA  
CCTCTTTCAACCATGCGTCCACCCCGGTTAATTTTGACCCGTGACGGTAATACAATAGCTCGGTAAGC  
TTGGGTGAGTCAAAATCTAGTCTCGCTCTAGACCTTCTTGACCATCTGGCAGTCAGCATA  
+  
:FF,FFFF,,F:F,FFFFFF:FF,:FFF:FFFFFFFF:FFF:FFFF,FF,,FFFF:.,FFFF  
FFF,FFFFFFFF,F,FFF:FF:FFFF,FFFF:FFFFFFFFFFFFFFFF:FFFFFFFF,  
@A00155:342:HHGFNDSXY:1:1132:25165:13009 2:N:0:GAACCTAG+TCCGCATA  
CCCCTTTCAACCATGCGTCCACCCCGGTTAATTTTGACCCGTGACGGTAATACAATAGCTCGGTAAGC  
TTGGGTGAGTCAAAATCTAGTCTCGCTCTAGACCTTCTTGACCATCTGGCAGTCAGCATAAGGA  
+  
FFFFFFFFFFFFFFFFFFFFFFFFFFFFFFFFFFFFFFFFFFFFFFFFFFFFFFFFFFFFFFFF  
FFFFFFFFFFFFFFFFFFFFFFFFFFFFFFFFFFFFFFFFFFFFFFFFFFFFFFFFFFFFFFFF  
@A00155:342:HHGFNDSXY:1:2341:4255:8547 2:N:0:GAACCTAG+TCCGCATA  
CCTTTCAACCATGCGTCCACCCCGGTTAATTTTGACCCGTGACGGTAATACAATAGCTCGGTAAGCTT  
GGGTGAGTCAAAATCTAGTCTCGCTCTAGACCTTCTTGACCATCTGGCAGTCAGCATAAGGACGATAG  
+  
FFFFFFFFFFFFFFFFFFFFFFFFFFFFFFFFFFFFFFFFFFFFFFFFFFFFFFFF:FFFFFFFFFFFF  
FFFFFFFFFFFF,FFFFFFFFFFFFFFFFFFFFFFFF:FFFFFFFF:FFFFFFFFFFFF  
@A00155:342:HHGFNDSXY:1:1538:4038:10019 2:N:0:GAACCTAG+TCCGCATA  
CCTTTCAACCATGCGTCCACCCCGGTTAATTTTGACCCGTGACGGTAATACAATAGCTCGGTAAGCTT  
GGGTGAGTCAAAATCTAGTCTCGCTCTAGACCTTCTTGACCATCTGGCAGTCAGCATAAGGACGATAG  
+  
FFFFFFFFFFFF:FFFFFFFF:F,FFFF:F,FFFFFFFFFFFFFFFF:FFFFFFFF:FFFFF  
FFFFFFFFFFFF:FFFFFFFFFFFFFFFF:FFFFFF:FFFFFFFFFFFFFFFFFFFFFFFF  
@A00155:342:HHGFNDSXY:1:1114:4833:12931 2:N:0:GAACCTAG+TCCGCATA  
CTTTCAACCATGCGTCCACCCCGGTTAATTTTGACCCGTGACGGTAATACAATAGCTCGGTAAGCTTG  
GGTGAGTCAAAATCTAGTCTCGCTCTAGACCTTCTTGACCATCTGGCAGTCAGCATAAGGACGATAGT  
+  
FFFFFFFFFFFFFFFFFFFFFFFF,FFFFFFFFFFFFFFFFFFFFFFFF:FFFFFFFFFFFF  
FF,FFFFFFFFFFFFFFFFFFFFFFFFFFFFFFFFFFFFFFFF:FFFFFFFFFFFFFFFF  
@A00155:342:HHGFNDSXY:1:1114:3513:11490 2:N:0:GAACCTAG+TCCGCATA  
TTTCAACCATGCGTCCACCCCGGTTAATTTTGACCCGTGACGGTAATACAATAGCTCGGTAAGCTTGG

GTGAGTCAAAATCTAGTCTCGCTCTAGACCTTCTTGACCATCTGGCAGTCAGCATAAAGGACGATAGT  
+  
FF:FF::F,FF,FFF:FFFFFFFFFFFFFFFFFFFFFFFFFFFFFFFFFFFFFFFFFFF:FFFFFFFFF:,FFFFFFFFFFFFFFFFF  
FFFFFFFF:FFFFFFFFFFFFFFFFFFFFFFFFFFFFFFFFFFFFFFFFFFFFFFFFFFFFFFFFFFFFFFFFFFFFFFFFFFFFFFFF  
@A00155:342:HHGFNDSXY:1:2139:17137:18865 2:N:0:GAACCTAG+TCCGCATA  
TTTCAACCATGCGTCCACCCCGGTTAATTTTGACCCGTGACGGTAATACAATAGCTCGGTAAGCTTGG  
GTGAGTCAAAATCTAGTCTCGCTCTAGACCTTCTTGACCATCTGGCAGTCAGCATAAAGGACGATAGTT  
+  
FFFFFFFFFFFFFFFFFFFFFFFFFFFFFFFFFFFFFFFFFFFFFFFFFFFFFFFFFFFFFFFFFFFFFFFFFFFFFFFFFFFFFFFF  
FFFFFFFF:FFFFFFFFFFFFFFFFFFFFFFFFFFFFFFFFFFFFFFFFFFFFFFFFFFFFFFFFFFFFFFFFFFFFFFFFFFFFFFFF  
@A00155:342:HHGFNDSXY:1:1153:24261:29418 2:N:0:GAACCTAG+TCCGCATA  
TTTCAACCATGCGTCCACCCCGGTTAATTTTGACCCGTGACGGTAATACAATAGCTCGGTAAGCTTGG  
GTGAGTCAAAATCTAGTCTCGCTCTAGACCTTCTTGACCATCTGGCAGTCAGCATAAAGGACGATAGTT  
+  
FFFFFFFFF,FFFFFFFFFFFFFFFFFFFFFFFFFFFFFFFFFFFFFFFFFFFFFFFFFFFFFFFFFFFFFFFFFFFFFFFFFFFFF  
FFFFFFFFFFFFFFFFFFFFFFFFFFFFFFFFFFFFFFFFFFFFFFFFFFFFFFFFFFFFFFFFFFFFFFFFFFFFFFFFFFFFFFFF  
@A00155:342:HHGFNDSXY:1:2274:31421:26600 2:N:0:GAACCTAG+TCCGCATA  
TTTCAACCATGCGTCCACCCCGGTTAATTTTGACCCGTGACGGTAATACAATAGCTCGGTAAGCTTGG  
GTGAGTCAAAATCTAGTCTCGCTCTAGACCTTCTTGACCATCTGGCAGTCAGCATAAAGGACGATAGTT  
+  
FFFFFFFFFFFFFFFFFFFFFFFFFFFFFFFFFFFFFFFFFFFFFFFFFFFFFFFFFFFFFFFFFFFFFFFFFFFFFFFFFFFFFFFF  
FFFFFFFFFFFFFFFFFFFFFFFFFFFFFFFFFFFFFFFFFFFFFFFFFFFFFFFFFFFFFFFFFFFFFFFFFFFFFFFFFFFFFFFF  
@A00155:342:HHGFNDSXY:1:2425:7301:12226 2:N:0:GAACCTAG+TCCGCATA  
CAACCATGCGTCCACCCCGGTTAATTTTGACCCGTGACGGTAATACAATAGCTCGGTAAGCTTGGGTG  
AGTCAAAATCTAGTCTCGCTCTAGACCTTCTTGACCATCTGGCAGTCAGCATAAAGGACGATAGTTGC  
+  
F:FF:FFFFFFFFFFFFFFFF:FFFFFFFF:FFFFFFFFFFFFFFFFFFFFFFFF:FFFF,:FFFFFFFF:FFFFFFFFFFFF  
FFFFFFFFFFFFFFFFFFFFFFFFFFFFFFFFFFFFFFFFFFFFFFFFFFFFFFFFFFFFFFFFFFFFFFFFFFFFFFFFFFFFFFFF  
@A00155:342:HHGFNDSXY:1:1138:31485:7639 2:N:0:GAACCTAG+TCCGCATA  
CAACCATGCGTCCACCCCGGTTAATTTTGACCCGTGACGGTAATACAATAGCTCGGTAAGCTTGGGTG  
AGTCAAAATCTAGTCTCGCTCTAGACCTTCTTGACCATCTGGCAGTCAGCATAAAGGACGATAGTTGCC  
+  
FFFFFFFFFFFFFFFFFFFFFFFFFFFFFFFFFFFFFFFFFFFFFFFFFFFFFFFFFFFFFFFFFFFFFFFFFFFFFFFFFFFFFFFF  
FF:FFFFFFFFFFFFFFFFFFFF:FF:FFFFFFFFFFFFFFFFFFFF:FFFFFFFFFFFFFFFFFFFFFFFFFFFF:FF:FFFFF  
@A00155:342:HHGFNDSXY:1:2557:26955:8124 2:N:0:GAACCTAG+TCCGCATA  
CAACCATGCGTCCACCCCGGTTAATTTTGACCCGTGACGGTAATACAATAGCTCGGTAAGCTTGGGTG  
AGTCAAAATCTAGTCTCGCTCTAGACCTTCTTGACCATCTGGCAGTCAGCATAAAGGACGATAGTTGCC  
+  
FFFFFFFFFFFFFFFFFFFFFFFFFFFFFFFFFFFFFFFFFFFFFFFFFFFFFFFFFFFFFFFFFFFFFFFFFFFFFFFFFFFFFFFF  
FFFFFFFFFFFFFFFFFFFFFFFFFFFFFFFFFFFFFFFFFFFFFFFFFFFFFFFFFFFFFFFFFFFFFFFFFFFFFFFFFFFFFFFF  
@A00155:342:HHGFNDSXY:1:1633:9534:8766 1:N:0:GAACCTAG+TCCGCATA  
AACCATGCGTCCACCCCGGTTAATTTTGACCCGTGACGGTAATACAATAGCTCGGTAAGCTTGGGTGA  
GTCAAAATCTAGTCTCGCTCTAGACCTTCTTGACCATCTGGCAGTCAGCATAAAGGACGATAGTTGCCT  
+  
FFFFFFFFFFFFFFFFFFFFFFFFFFFFFFFFFFFFFFFFFFFFFFFFFFFFFFFFFFFFFFFFFFFFFFFFFFFFFFFFFFFFFFFF  
FFFFFFFFFFFFFFFFFFFFFFFFFFFFFFFFFFFFFFFFFFFFFFFFFFFFFFFFFFFFFFFFFFFFFFFFFFFFFFFFFFFFFFFF  
@A00155:342:HHGFNDSXY:1:1633:9688:17957 1:N:0:GAACCTAG+TCCGCATA  
AACCATGCGTCCACCCCGGTTAATTTTGACCCGTGACGGTAATACAATAGCTCGGTAAGCTTGGGTGA  
GTCAAAATCTAGTCTCGCTCTAGACCTTCTTGACCATCTGGCAGTCAGCATAAAGGACGATAGTTGCCT  
+  
FFFFFFFFFFFFFFFFFFFFFFFFFFFFFFFFFFFFFFFFFFFFFFFFFFFFFFFFFFFFFFFFFFFFFFFFFFFFFFFFFFFFFFFF  
FFFFFFFFFFFFFFFFFFFFFFFFFFFFFFFFFFFFFFFFFFFFFFFFFFFFFFFFFFFFFFFFFFFFFFFFFFFFFFFFFFFFFFFF  
@A00155:342:HHGFNDSXY:1:1416:6262:35383 2:N:0:GAACCTAG+TCCGCATA  
ACCATGCGTCCACCCCGGTTAATTTTGACCCGTGACGGTAATACAATAGCTCGGTAAGCTTGGGTGAG

TCAAAATCTAGTCTCGCTCTAGACCTTCTTGACCATCTGGCAGTCAGCATAAGGACGATAGTTGC  
+  
FFF,FFFF,FFFFF,:FFFF:FFFFFFFFFFFFFFFFFFFF:FFFF:FFFFFFFF,FFFFFFFFF  
FFFF:FFFFFFFFFFFFFFFFFFFF:F:FFFFFFFFFFFF,FFFFFFFFFFFFFFFFFFFFF  
@A00155:342:HHGFNDSXY:1:1112:3233:34992 2:N:0:GAACCTAG+TCCGCATA  
CATGCGTCCACCCCGGTTAATTTTGACCCGTGACGGTAATACAATAGCTCGGTAAGCTTGGGTGAGTC  
AAAATCTAGTCTCGCTCTAGACCTTCTTGACCATCTGGCAGTCAGCATAAGGACGATAGTTGCCTCCA  
+  
FFFFFFFFFFFFFFFFFFFF:FF:F:F::FFFFFFFF:FFFFFF,FFFFFFFFF:FFFFFFFFFFFFF  
FFFFFFFFFFFFFFFFFFFFFFFFFFFFFFFF:FFFFFFFFFFFFFFFFFFFFFFFF:FFFFFFFFFFFFFFFFF  
@A00155:342:HHGFNDSXY:1:1234:24162:19069 1:N:0:GAACCTAG+TCCGCATA  
ATGCGTCCACCCCGGTTAATTTTGACCCGTGACGGTAATACAATAGCTCGGTAAGCTTGGGTGAGTCA  
AAATCTAGTCTCGCTCTAGACCTTCTTGACCATCTGGCAGTCAGCATAAGGACGATAGTTGCCTCCAT  
+  
FFFFFFFFFFFFFFFFFFFFFFFFFFFFFFFFFFFF,FFFFFFFFFFFFFFFFFFFF:FFFFFFFFFFFF  
FFFFFFFFFFFFFFFFFFFFFFFFFFFFFFFF:FFFFFFFFFFFFFFFFFFFFFFFFFFFFFFFFFFFFFFFFF  
@A00155:342:HHGFNDSXY:1:2554:20799:25081 1:N:0:GAACCTAG+TCCGCATA  
TGCGTCCACCCCGGTTAATTTTGACCCGTGACGGTAATACAATAGCTCGGTAAGCTTGGGTGAGTCAA  
AATCTAGTCTCGCTCTAGACCTTCTTGACCATCTGGCAGTCAGCATAAGGACGATAGTTGCC  
+  
FFFFFFFFFFFFFFFFFFFFFFFFFFFFFFFFFFFFFFFFFFFF:FFFFFFFFFFFFFFFFFFFFF  
FFFFFFFFFFFFFFFFFFFFFFFFFFFFFFFFFFFFFFFFFFFFFFFFFFFFFFFFFFFFFFFFFFFF:FFFFF  
@A00155:342:HHGFNDSXY:1:1613:3432:32612 1:N:0:GAACCTAG+TCCGCATA  
TGCGTCCACCCCGGTTAATTTTGACCCGTGACGGTAATACAATAGCTCGGTAAGCTTGGGTGAGTCAA  
AATCTAGTCTCGCTCTAGACCTTCTTGACCATCTGGCAGTCAGCATAAGGACGATAGTTGCCTCCATG  
+  
FFFFFFFFFFFFFFFFFFFFFFFFFFFFFFFFFFFFFFFFFFFF:FFF,FFFFFFFFF:FFF,FFFFFFFFF  
FFFFFFFFFFFFFFFFFFFFFFFFFFFFFFFFFFFFFFFFFFFFFFFFFFFFFFFFFFFFFFFFFFFFF  
@A00155:342:HHGFNDSXY:1:2557:26955:8124 1:N:0:GAACCTAG+TCCGCATA  
GCGTCCACCCCGGTTAATTTTGACCCGTGACGGTAATACAATAGCTCGGTAAGCTTGGGTGAGTCAAA  
ATCTAGTCTCGCTCTAGACCTTCTTGACCATCTGGCAGTCAGCATAAGGACGATAGTTGCCTCCATGA  
+  
FFFFFFFFFFFFFFFFFFFFFFFFFFFFFFFFFFFFFFFFFFFF:FFFFFFFFFFFFFFFFFFFF,FFFFFFFFFFFFF  
FFFFFFFFFFFFFFFFFFFFFFFFFFFFFFFFFFFFFFFFFFFF:FFFFFFFFFFFFFFFFFFFF,FFFFFFFFFFFF  
@A00155:342:HHGFNDSXY:1:1137:22724:25629 2:N:0:GAACCTAG+TCCGCATA  
GCGTCCACCCCGGTTAATTTTGACCCGTGACGGTAATACAATAGCTCGGTAAGCTTGGGTGAGTCAAA  
ATCTAGTCTCGCTCTAGACCTTCTTGACCATCTGGCAGTCAGCATAAGGACGATAGTTGCCTCCATGA  
+  
F:FFFFFFFFFFFFFFFF:FFFFFFFFFFFFFFFFFFFFFFFFFFFFFFFFFFFFFFFFFFFFFFFFFFFFF  
FFFFFFFFFFFFFFFFFFFFFFFFFFFFFFFFFFFFFFFFFFFFFFFFFFFFFFFFFFFFFFFFFFFFFFFFF  
@A00155:342:HHGFNDSXY:1:2524:22860:32972 1:N:0:GAACCTAG+TCCGCATA  
GCGTCCACCCCGGTTAATTTTGACCCGTGACGGTAATACAATAGCTCGGTAAGCTTGGGTGAGTCAAA  
ATCTAGTCTCGCTCTAGACCTTCTTGACCATCTGGCAGTCAGCATAAGGACGATAGTTGCCTCCATGA  
+  
FFFFFFFFFFFFFFFFFFFFFFFFFFFFFFFFFFFFFFFFFFFFFFFFFFFFFFFFFFFFFFFFFFFF:FFFFFFFFFFFFF  
FFFFFFFFFFFFFFFFFFFFFFFFFFFFFFFFFFFFFFFFFFFF:FFFFFFFFFFFF,FFFFF:FFF,FFFFFFFF:FF  
@A00155:342:HHGFNDSXY:1:2222:28700:1752 1:N:0:GAACCTAG+TCCGCATA  
CGTCCACCCCGGTTAATTTTGACCCGTGACGGTAATACAATAGCTCGGTAAGCTTGGGTGAGTCAAAA  
TCTAGTCTCGCTCTAGACCTTCTTGACCATCTGGCAGTCAGCATAAGGACGATAGTTGCC  
+  
FFFFFFFFFFFFFFFFFFFFFFFFFFFFFFFFFFFFFFFFFFFF:FFFFFFFFFFFF:FF:FFFFFFFFF:FFFFFFFFF  
FFFFFFFFFFFFFFFFFFFFFFFFFFFFFFFFFFFFFFFFFFFFFFFFFFFFFFFFFFFFFFFFFFFF:FFFFFFFFF  
@A00155:342:HHGFNDSXY:1:2674:6334:11146 1:N:0:GAACCTAG+TCCGCATA  
CGTCCACCCCGGTTAATTTTGACCCGTGACGGTAATACAATAGCTCGGTAAGCTTGGGTGAGTCAAAA

TCTAGTCTCGCTCTAGACCTTCTTGACCATCTGGCAGTCAGCATAAGGACGATAGTTGCC  
+  
FFFFFFFFFFFFFFFFFFFFFFFFFFFFFFFFFFFFFFFFFFF:FFFFFFFFFFFFFFFFFFFFFFFFF:FFFF:FFFFFFFFFFFFFFFFFFFF  
F,FF:FFFFFFFFFFFFFFFF,FFFFFFFF,FFFFFFFFFFFF:FFFFFFFFFFFF:FFFF:FFFF:FFFF  
@A00155:342:HHGFNDSXY:1:1335:13340:27508 1:N:0:GAACCTAG+TCCGCATA  
CGTCCACCCCGGTAAATTTTGACCCGTGACGGTAATACAATAGCTCGGTAAGCTTGGGTGAGTCAAAA  
TCTAGTCTCGCTCTAGACCTTCTTGACCATCTGGCAGTCAGCATAAGGACGATAGTTGCCTCCATGA  
+  
FFFFFFFFFFFFFFFFFFFFFFFFFFFFFFFFFFFFFFFFFFFFFFFFFFFFFFFFFFFFFFFFFFFFFFFFFFFFFFFF  
FFFFFFFFFFFFFFFFFFFFFFFFFFFFFFFFFFFFFFFFFFFFFFFFFFFFFFFFFFFFFFFFFFFFFFFFFFFFFFFF  
@A00155:342:HHGFNDSXY:1:2527:10836:16219 1:N:0:GAACCTAG+TCCGCATA  
CGTCCACCCCGGTAAATTTTGACCCGTGACGGTAATACAATAGCTCGGTAAGCTTGGGTGAGTCAAAA  
TCTAGTCTCGCTCTAGACCTTCTTGACCATCTGGCAGTCAGCATAAGGACGATAGTTGCCTCCATGA  
+  
FF:F:FFFFFFFF:FFF:FFFF,FFFFFFFFF,,FFFFFFFFFFFF,:FFFFFFFFFFFFFFFF:FFFFFF:  
FFFFFFFFFFFF:,FFFF::F:FFFF:F:F,FFFF,FFFF::FFFFFFFF:,F:FFFF:,FFFFFFFF  
@A00155:342:HHGFNDSXY:1:1532:17237:27649 1:N:0:GAACCTAG+TCCGCATA  
CGTCCACCCCGGTAAATTTTGACCCGTGACGGTAATACAATAGCTCGGTAAGCTTGGGTGAGTCAAAA  
TCTAGTCTCGCTCTAGACCTTCTTGACCATCTGGCAGTCAGCATAAGGACGATAGTTGCCTCCATGAC  
+  
FFFFFFFFFFFFFFFFFFFFFFFFFFFFFFFFFFFFFFFFFFFF:FFFFF:F::FFFF:FF,,FFFFFFFF:FFFF  
FFFFFFFF:F:FFFFF,FFF:FFFFFFFFFFFFFFFFFFFFFFFFFFFFFFFFFFFFFFFFFFFF::FFFFFFFFFFFF  
@A00155:342:HHGFNDSXY:1:2310:7139:12790 1:N:0:GAACCTAG+TCCGCATA  
GTCCACCCCGGTAAATTTTGACCCGTGACGGTAATACAATAGCTCGGTAAGCTTGGGTGAGTCAAAT  
CTAGTCTCGCTCTAGACCTTCTTGACCATCTGGCAGTCAGCATAAGGACGATAGTTGCCTCCATGACG  
+  
FFFFFFFFFFFFFFFFFFFFFFFFFFFFFFFFFFFFFFFFFFFF:FFFFFFFFFFFFFFFFFFFFFFFFFFFF,FFFFFFFF:FFFFF  
FFFFFFFFFFFF:FFFFFFFF:FFFFFFFFFFFFFFFFFFFFFFFFFFFFFFFFFFFFFFFFFFFF:FFFFFFFFFFFFFFFFFFFFFFFFFFFF  
@A00155:342:HHGFNDSXY:1:1302:5683:9987 2:N:0:GAACCTAG+TCCGCATA  
GTCCACCCCGGTAAATTTTGACCCGTGACGGTAATACAATAGCTCGGTAAGCTTGGGTGAGTCAAAT  
CTAGTCTCGCTCTAGACCTTCTTGACCATCTGGCAGTCAGCATAAGGACGATAGTTGCCTCCATGACG  
+  
FFFFFFFFFFFFFFFFFFFFFFFFFFFFFFFFFFFFFFFFFFFF,FFFFF:FFFFFFFFFFFFFFFFFFFFFFFFFFFFFFFFFFFFFFFF  
FFFFFFFFFFFFFFFFFFFF:FFFFFFFFFFFFFFFFFFFFFFFFFFFFFFFFFFFFFFFFFFFFFFFFFFFFFFFFFFFFFFFFFFFF:F  
@A00155:342:HHGFNDSXY:1:1625:5421:15734 2:N:0:GAACCTAG+TCCGCATA  
GTCCACCCCGGTAAATTTTGACCCGTGACGGTAATACAATAGCTCGGTAAGCTTGGGTGAGTCAAAT  
CTAGTCTCGCTCTAGACCTTCTTGACCATCTGGCAGTCAGCATAAGGACGATAGTTGCCTCCATGACG  
+  
FF,FFFFFF,,FFFFFF:FFFFFFFFFFFFFFFFFFFFF:FFFFFFFFFFFF:FFFF,FF:FFF,FFFFFFFF  
,FF,F:FFFFFFFFFFFFFFFFFFFFFFFFFFFFFFFFFFFFFFFFFFFF,FFFFFFFFF:,FFFFFF,FF:, ,FFFF  
@A00155:342:HHGFNDSXY:1:1633:9534:8766 2:N:0:GAACCTAG+TCCGCATA  
CCACCCCGGTAAATTTTGACCCGTGACGGTAATACAATAGCTCGGTAAGCTTGGGTGAGTCAAATCT  
AGTCTCGCTCTAGACCTTCTTGACCATCTGGCAGTCAGCATAAGGACGATAGTTGCCTCCATGACGTT  
+  
FFFFFFFFFFFFFFFFFFFFFFFFFFFFFFFFFFFFFFFFFFFFFFFFFFFFFFFFFFFFFFFFFFFFFFFFFFFFFFFF  
FFFFFFFFFFFFFFFFFFFFFFFFFFFFFFFFFFFFFFFFFFFFFFFFFFFFFFFFFFFFFFFFFFFFFFFFFFFFFFFF  
@A00155:342:HHGFNDSXY:1:1633:9688:17957 2:N:0:GAACCTAG+TCCGCATA  
CCACCCCGGTAAATTTTGACCCGTGACGGTAATACAATAGCTCGGTAAGCTTGGGTGAGTCAAATCT  
AGTCTCGCTCTAGACCTTCTTGACCATCTGGCAGTCAGCATAAGGACGATAGTTGCCTCCATGACGTT  
+  
FFFFFFFFFFFFFFFFFFFFFFFFFFFFFFFFFFFFFFFFFFFFFFFFFFFFFFFFFFFFFFFFFFFFFFFFFFFFFFFF  
FFFFFFFFFFFFFFFFFFFF:FFFFFFFFFFFFFFFFFFFFFFFFFFFFF:FFFFFF:FFFFFFFFFFFF:FFFFFF  
@A00155:342:HHGFNDSXY:1:2263:2338:32252 1:N:0:GAACCTAG+TCCGCATA  
CCGGTTAAATTTTGACCCGTGACGGTAATACAATAGCTCGGTAAGCTTGGGT

[illegible]

[illegible]

[illegible]



[illegible]

@A00155:342:HHGFNDSXY:1:2557:12454:10911 1:N:0:GAACCTAG+TCCGCATA  
TGACCCGTGACGGTAATACAATAGCTCGGTAAGCTTGGGTGAGTCAAATCTAGTCTCGCTCTAGACC  
TTCTTGACCATCTGGCAGTCAGCATAAGGACGATAGTTGCCTCCATGACGTTTAGCCCCCGCAGGTCC  
+  
FFFFFFFFFFFFFFFF:FFFFFFFFFFFFFFFF:FFFFFFFFFFFFFFFF:FFFFFFFFFFFFFFFF:FFFFFFFF  
FFFFFFFFFFFFFFFF,FFFFFFFF:FFFFFFFFFFFFFFFF:FFFFFFFFFFFFFFFF:FFFFFFFF  
@A00155:342:HHGFNDSXY:1:2205:13666:17832 1:N:0:GAACCTAG+TCCGCATA  
GACCCGTGACGGTAATACAATAGCTCGGTAAGCTTGGGTGAGTCAAATCTAGTCTCGCTCTAGACCT  
TCTTGACCATCTGGCAGTCAGCATAAGGACGATAGTTGCCTCCATGACGTTTAGCCCCCGCAGGTCCA  
+  
FFFFFFFFFFFFFFFF:FFFFFFFFFFFFFFFF:FFFFFFFFFFFFFFFF:FFFFFFFFFFFFFFFF:FFFFFFFF  
FFFFFFFF:FFFFFFFFFFFFFFFF:FFFFFFFFFFFFFFFF:FFFFFFFFFFFFFFFF:FFFFFFFF  
@A00155:342:HHGFNDSXY:1:2633:13087:20306 2:N:0:GAACCTAG+TCCGCATA  
ACCCGTGACGGTAATACAATAGCTCGGTAAGCTTGGGTGAGTCAAATCTAGTCTCGCTCTAGACCTT  
CTTGACCATCTGGCAGTCAGCATAAGGACGATAGTTGCCTCCATGACGTTTAGCCCCCGCAGGTCCAC  
+  
FFFFFFFFFFFFFFFF:FFFFFFFFFFFFFFFF:FFFFFFFFFFFFFFFF:FFFFFFFFFFFFFFFF:FFFFFFFF  
FFFFFFFF:FFFFFFFFFFFFFFFF:FFFFFFFFFFFFFFFF:FFFFFFFFFFFFFFFF:FFFFFFFF  
@A00155:342:HHGFNDSXY:1:1678:7482:30107 1:N:0:GAACCTAG+TCCGCATA  
ACCCGTGACGGTAATACAATAGCTCGGTAAGCTTGGGTGAGTCAAATCTAGTCTCGCTCTAGACCTT  
CTTGACCATCTGGCAGTCAGCATAAGGACGATAGTTGCCTCCATGACGTTTAGCCCCCGCAGGTCCAC  
+  
FFFFFFFFFFFFFFFF:FFFFF:FFFFF:FFFFF,FFFF:F:FFFFFFFFFFFFFFFF:FFFFFFFF  
FFF,FFFFFFFFFFFFFFFF:FFF:FF,FFFFFFFFFFFFFFFF:FFFFFFFF  
@A00155:342:HHGFNDSXY:1:1339:12093:12759 2:N:0:GAACCTAG+TCCGCATA  
ACCCGTGACGGTAATACAATAGCTCGGTAAGCTTGGGAGAGTCAAATCTAGTCTCGCTCTAGACCTT  
CTTGACCATCTGGCAGTCAGCATAAGGACGATAGTTGCCTCCATGACGTTTAGCCCCCGCAGGTCCAC  
+  
:FFFFFFFFFFFFFFFF:FFFFF,FFFFFFFFFFFFFFFF:FFFFFFFF  
FFFFFFFFFFFFFFFF:FFFFFFFF  
@A00155:342:HHGFNDSXY:1:2463:2383:18740 2:N:0:GAACCTAG+TCCGCATA  
ACCCGTGACGGTAATACAATAGCTCGGTAAGCTTGGGAGAGTCAAATCTAGTCTCGCTCTAGACCTT  
CTTGACCATCTGGCAGTCAGCATAAGGACGATAGTTGCCTCCATGACGTTTAGCCCCCGCAGGTCCAC  
+  
FFFFF:FFFFFFFFFFFFFFFF,FFFFFFFFFFFFFFFF:FFFFFFFF  
FFFFFFFFFFFFFFFF:FFFFFFFF  
@A00155:342:HHGFNDSXY:1:2354:9815:5744 1:N:0:GAACCTAG+TCCGCATA  
ACCCGTGACGGTAATACAATAGCTCGGTAAGCTTGGGTGAGTCAAATCTAGTCTCGCTCTAGACCTT  
CTTGACCATCTGGCAGTCAGCATAAGGACGATAGTTGCCTCCATGACGTTTAGCCCCCGCAGGTCCAC  
+  
FFFFFFFFFFFFFFFF:FFFFFFFFFFFFFFFF:FFFFFFFFFFFFFFFF:FFFFFFFFFFFFFFFF:FFFFFFFF  
FFFFFFFF:FFFFFFFFFFFFFFFF:FFFFFFFFFFFFFFFF:FFFFFFFFFFFFFFFF:FFFFFFFF  
@A00155:342:HHGFNDSXY:1:2378:20283:4648 1:N:0:GAACCTAG+TCCGCATA  
ACCCGTGACGGTAATACAATAGCTCGGTAAGCTTGGGTGAGTCAAATCTAGTCTCGCTCTAGACCTT  
CTTGACCATCTGGCAGTCAGCATAAGGACGATAGTTGCCTCCATGACGTTTAGCCCCCGCAGGTCCAC  
+  
FFFFFFFFFFFFFFFF:FFFFFFFFFFFFFFFF:FFFFFFFFFFFFFFFF:FFFFFFFFFFFFFFFF:FFFFFFFF  
FFFFFFFF:FFFFFFFFFFFFFFFF:FFFFFFFFFFFFFFFF:FFFFFFFFFFFFFFFF:FFFFFFFF  
@A00155:342:HHGFNDSXY:1:1222:3070:7498 2:N:0:GAACCTAG+TCCGCATA  
ACCCGTGACGGTAATACAATAGCTCGGTAAGCTTGGGTGAGTCAAATCTAGTCTCGCTCTAGACCTT  
CTTGACCTTCTGGCAGTCAGCATAAGGACGATAGTTGCCTCCATGACGTTTAGCCCCCGCAGGTCCAC  
+  
FFFFFFFFFFFFFFFF:FFFFFFFFFFFFFFFF:FFFFFFFFFFFFFFFF:FFFFFFFFFFFFFFFF:FFFFFFFF  
FFFFF:F:,FFFFFFFFFFFFFFFF:FFFFFFFFFFFFFFFF:FFFFFFFF

[illegible]

@A00155:342:HHGFNDSXY:1:1511:23005:13495 1:N:0:GAACCTAG+TCCGCATA  
CCGTGACGGTAATACAATAGCTCGGTAAGCTTGGGTGAGTCAAAATCTAGTCTCGCTCTAGACCTTCT  
TGACCATCTGGCAGTCAGCATAAGGACGATAGTTGCCTCCATGACGTTTAGCCCCCGCAGGTCCACGG  
+  
FFFFFFFF:FFFFFFFF:FFFFFFFF:FFFFFFFFFFFFFFFFFFFFFFFFFFFFFFFF:FFF  
FFFFFF:FFFFFFFFFFFFFFFFFFFFFFFFFFFFFFFF:FFFFFFFFFFFFFFFFFFFFFFFF  
@A00155:342:HHGFNDSXY:1:1610:7229:1517 1:N:0:GAACCTAG+TCCGCATA  
CCGTGACGGTAATACAATAGCTCGGTAAGCTTGGGTGAGTCAAAATCTAGTCTCGCTCTAGACCTTCT  
TGACCATCTGGCAGTCAGCATAAGGACGATAGTTGCCTCCATGACGTTTAGCCCCCGCAGGTCCACGG  
+  
FFFFFFFFFFFFFFFFFFFFFFFF:FFFFFF:F,FFFFFFFF:FFFFFFFF:FFFFFFFFFFFFFFFF  
FFFFFFFFFFFFFFFFFFFFFFFF:FFFFFFFF:FFFFFFFFFFFFFFFFFFFFFFFFFFFFFFFF  
@A00155:342:HHGFNDSXY:1:1212:20961:26929 1:N:0:GAACCTAG+TCCGCATA  
CCGTGACGGTAATACAATAGCTCGGTAAGCTTGGGTGAGTCAAAATCTAGTCTCGCTCTAGACCTTCT  
TGACCATCTGGCAGTCAGCATAAGGACGATAGTTGCCTCCATGACGTTTAGCCCCCGCAGGTCCACGG  
+  
FFFFFFFFFFFFFFFFFFFFFFFFFFFFFFFFFFFFFFFFFFFFFFFFFFFFFFFF:FFFFFFF  
FFFFFFFFFFFFFFFFFFFFFFFFFFFFFFFFFFFFFFFFFFFFFFFFFFFFFFFFFFFFFFFF  
@A00155:342:HHGFNDSXY:1:2304:3558:14105 1:N:0:GAACCTAG+TCCGCATA  
CCGTGACGGTAATACAATAGCTCGGTAAGCTTGGGTGAGTCAAAATCTAGTCTCGCTCTAGACCTTCT  
TGACCATCTGGCAGTCAGCATAAGGACGATAGTTGCCTCCATGACGTTTAGCCCCCGCAGGTCCACGG  
+  
F,: ,FF:F,F:FFFFFF::FFF,FFFF:FFF,F,FFF:FF::,,: ,FFFFFFFFFFFFF,: ,  
FFFFFF:FFF,,FFFF:,FFFF,FF,F:F,,F,FFF,:FF:FFFFFF,FFF,: ,:FFFF:F  
@A00155:342:HHGFNDSXY:1:1547:8449:11365 2:N:0:GAACCTAG+TCCGCATA  
CGTGACGGTAATACAATAGCTCGGTAAGCTTGGGTGAGTCAAAATCTAGTCTCGCTCTAGACCTTCT  
GACCATCTGGCAGTCAGCATATGGACGATAGTTGCCTCCATGACGTTTAGCCCCCGCAGGTCCACGGC  
+  
FFFFFFFFFFFFFFFFFFFFFFFF:FFFFFFFFFFFFFFFFFFFFFFFFFFFFFFFFFFFFFFFF  
FFFFFFFFFFFFFFFFFFFFFFFF,FFFFFFFFFFFFFFFFFFFFFFFF:FFFFFFFFFFFFFFFF  
@A00155:342:HHGFNDSXY:1:1267:24424:6840 1:N:0:GAACCTAG+TCCGCATA  
CGTGACGGTAATACAATAGCTCGGTAAGCTTGGGTGAGTCAAAATCTAGTCTCGCTCTAGACCTTCT  
GACCATCTGGCAGTCAGCATAAGGACGATAGTTGCCTCCATGACGTTTAGCCCCCGCAGGTCCACGGC  
+  
FFFFFFFFFFFFFFFFFFFFFFFF:FFFFFFFFFFFFFFFFFFFFFFFFFFFFFFFFFFFFFFFF  
F:FFFFFFFFFFFFFFFFFFFFFFFFFFFFFFFF:FFFFFF:FFFFFFFFFFFFFFFF  
@A00155:342:HHGFNDSXY:1:1549:19633:11631 1:N:0:GAACCTAG+TCCGCATA  
CGTGACGGTAATACAATAGCTCGGTAAGCTTGGGTGAGTCAAAATCTAGTCTCGCTCTAGACCTTCT  
GACCATCTGGCAGTCAGCATAAGGACGATAGTTGCCTCCATGACGTTTAGCCCCCGCAGGTCCACGGC  
+  
FFFFFFFFFFFFFFFF:FFFFFFFFFFFFFFFF:FFFFFFFFFFFFFFFFFFFFFFFFFFFFFFFF:FF:F  
FFFFFFFFFFFFFFFFFFFFFFFFFFFFFFFFFFFFFFFFFFFFFFFFFFFFFFFFFFFFFFFF  
@A00155:342:HHGFNDSXY:1:1448:15031:19946 1:N:0:GAACCTAG+TCCGCATA  
GTGACGGTAATACAATAGCTCGGTAAGCTTGGGTGAGTCAAAATCTAGTCTCGCTCTAGACCTTCTTG  
ACCATCTGGCAGTCAGCATAAGGACGATAGTTGCCTCCATGACGTTTAGCCCCCGCAGGTCCACGGCC  
+  
FFFFFFFFFFFFFFFFFFFFFFFFFFFFFFFFFFFFFFFFFFFFFFFFFFFFFFFFFFFFFFFF  
FFFFFFFFFFFFFFFFFFFFFFFFFFFFFFFFFFFFFFFF:FFFFFFFFFFFFFFFFFFFFFFFF  
@A00155:342:HHGFNDSXY:1:1564:26612:33301 1:N:0:GAACCTAG+TCCGCATA  
GTGACGGTAATACAATAGCTCGGTAAGCTTGGGTGAGTCAAAATCTAGTCTCGCTCTAGACCTTCTTG  
ACCATCTGGCAGTCAGCATAAGGACGATAGTTGCCTCCATGACGTTTAGCCCCCGCAGGTCCACGGCC  
+  
FFFFFFFFFFFFFFFFFFFFFFFFFFFFFFFFFFFFFFFFFFFFFFFFFFFFFFFFFFFFFFFF  
FFFFFFFFFFFFFFFF:FFFFFFFFFFFFFFFFFFFFFFFFFFFFFFFFFFFFFFFFFFFFFFFF

[illegible]

[illegible]

@A00155:342:HHGFNDSXY:1:1639:20166:29747 2:N:0:GAACCTAG+TCCGCATA  
CAATAGCTCGGTAAGCTTG GGTGAGTCAAAATCTAGTCTCGCTCTAGACCTTCTTGACCATCTGGCAG  
TCAGCATAAGGACGATAGTTGCCTCCATGACGTTTAGCCCCCGCAGGTCCACGGCCGGGTGCTCCAGC  
+  
FFF,FFFFFFFFFFFFFFF:FFFFFFFFFFFFFFF:FFFFFFFFFFFFFFF:FFFFFFFFFFFFFFF  
FFFFFFFFFFFFFFFFFFFFFFFFFFFFFFFFFFFFFFFFFFFFFFFFFFFFFFFFFFFFFFFFFFFFF  
@A00155:342:HHGFNDSXY:1:1166:12689:33802 1:N:0:GAACCTAG+TCCGCATA  
CAATAGCTCGGTAAGCTTG GGTGAGTCAAAATCTAGTCTCGCTCTAGACCTTCTTGACCATCTGGCAG  
TCAGCATAAGGACGATAGTTGCCTCCATGACGTTTAGCCCCCGCAGGTCCACGGCCGGGTGCTCCAGC  
+  
FFFFFFFFFFFFFFFFFFFFFFFFFFFFFFFFFFFFFFFFFFFFFFFFFFFFFFFFFFFFFFFFFFFFF  
FFFFFFFFFFFFFFFFFFFF:FFFFFFFFFFFFFFF:FFFFFFFFFFFFFFF:FFFFFFFFFFFFFFF  
@A00155:342:HHGFNDSXY:1:1606:12237:25817 1:N:0:GAACCTAG+TCCGCATA  
CAATAGCTCGGTAAGCTTG GGTGAGTCAAAATCTAGTCTCGCTCTAGACCTTCTTGACCATCTGGCAG  
TCAGCATAAGGACGATAGTTGCCTCCATGACGTTTAGCCCCCGCAGGTCCACGGCCGGGTGCTCCAGC  
+  
FFFFFFFFFFFFFFFFFFFFFFFFFFFFFFFFFFFFFFFFFFFFFFFFFFFFFFFFFFFFFFFFFFFFF  
FFFFFFFFFFFFFFFFFFFF:FFFFFFFFFFFFFFF:FFFFFFFFFFFFFFF:FFFFFFFFFFFFFFF  
@A00155:342:HHGFNDSXY:1:1166:13376:34334 1:N:0:GAACCTAG+TCCGCATA  
CAATAGCTCGGTAAGCTTG GGTGAGTCAAAATCTAGTCTCGCTCTAGACCTTCTTGACCATCTGGCAG  
TCAGCATAAGGACGATAGTTGCCTCCATGACGTTTAGCCCCCGCAGGTCCACGGCCGGGTGCTCCAGC  
+  
FFFFFFFFFFFFFFFFFFFF:FFFFFFFFFFFFFFFFFFFFFFFFFFFFFFFFFFFFFFFFFFFFF:FFFFFFFFFFFFFFF  
FFFFFFFFFFFFFFFFFFFFFFFFFFFFFFFFFFFFFFFFFFFFFFFFFFFFFFFFFFFFFFFFFFFFF  
@A00155:342:HHGFNDSXY:1:2569:29460:5165 2:N:0:GAACCTAG+TCCGCATA  
AATAGCTCGGTAAGCTTG GGTGAGTCAAAATCTAGTCTCGCTCTAGACCTTCTTGACCATCTGGCAGT  
CAGCATAAGGACGATAGTTGCCTCCATGACGTTTAGCCCCCGCAGGTCCACGGCCGGGTGCTCCAGCG  
+  
F:FFFFFFFFFFFFFFFFFFFF:FFFFFFF,FFFF:FFFFFFFFFFFFFFFFFFFFF:FFFFFFFFFFFFFFF  
FFFFFFFFFFFFFFFFFFFFFFFFFFFFFFFFFFFFFFFFFFFFFFFFFFFFFFFFFFFFFFFFFFFFF  
@A00155:342:HHGFNDSXY:1:1147:14407:19085 1:N:0:GAACCTAG+TCCGCATA  
ATAGCTCGGTAAGCTTG GGTGAGTCAAAATCTAGTCTCGCTCTAGACCTTCTTGACCATCTGGCAGTC  
AGCATAAGGACGATAGTTGCCTCCATGACGTTTAGCCCCCGCAGGTCCACGGCCGGGTGCTCCAGCGC  
+  
FFFFFFFFFFFFFFFFFFFFFFFFFFFFFFFFFFFFFFFFFFFFFFFFFFFFFFFFFFFFFFFFFFFFF  
FFFFFFFFFFFFFFFFFFFF:FFFFFFFFFFFFFFF,FFFFFFFFFFFFFFFFFFFFFFFFFFFFF:  
@A00155:342:HHGFNDSXY:1:1651:13910:31125 1:N:0:GAACCTAG+TCCGCATA  
ATAGCTCGGTAAGCTTG GGTGAATCAAAATCTAGTCTCGCTCTAGACCTTCTTGACCATCTGGCAGTC  
AGCATAAGGACGATAGTTGCCTCCATGACGTTTAGCCCCCGCAGGTCCACGGCCGGGTGCTCCAGCGC  
+  
FFFFFFFFFFFFFFFFFFFFFFFFFFFFFFFFFFFFFFFFFFFFFFFFFFFFFFFFFFFFFFFFFFFFF  
FFFFFFFFFFFFFFFFFFFF:FFFFFFFFFFFFFFF,FFFFFFFFFFFFFFFFFFFFFFFFFFFFF:  
@A00155:342:HHGFNDSXY:1:2551:21621:24627 1:N:0:GAACCTAG+TCCGCATA  
ATAGCTCGGTAAGCTTG GGTGAGTCAAAATCTAGTCTCGCTCTAGACCTTCTTGACCATCTGGCAGTC  
AGCATAAGGACGATAGTTGCCTCCATGACGTTTAGCCCCCGCAGGTCCACGGCCGGGTGCTCCAGCGC  
+

[illegible]



[illegible]

```
@A00155:342:HHGFNDSXY:1:2162:19452:8187 2:N:0:GAACCTAG+TCCGCATA
TCGGTAAGCTTGCGGTGAGTCAAAATCTAGTCTCGCTCTAGACCTTCTTGACCATCTGGCAGTCAGCAT
AAGGACGATAGTTGCCTCCATGACGTTTAGCCCCCGCAGGTCCACGGCCGGGTGCTCCAGCGCTGGCG
+
FFFFFFFFF:FFFFFFFFFFFFFFFFFFFFFFFFFFFFFFFFFFFFFFFFFFFFFFFFFFFFFFFFFFFFFFFFFFF
FFFFFFFFFFFFFFFFFFFFFFFFF:FFFFFFFFFFFFFFFFFFFFFFFFFFFFFFFFFFFFFFFFFFFFFFFFFFFFF
@A00155:342:HHGFNDSXY:1:2126:4978:25864 1:N:0:GAACCTAG+TCCGCATA
TCGGTAAGCTTGCGGTGAGTCAAAATCTAGTCTCGCTCTAGACCTTCTTGACCATCTGGCAGTCAGCAT
AAGGACGATAGTTGCCTCCATGACGTTTAGCCCCCGCAGGTCCACGGCCGGGTGCTCCAGCGCTGGCG
+
FFFFFFFFFFFFFFFFFFFFFFFFFFFFFFFFFFFFFFFFFFFFFFFFFFFFFFFFFFFFFFFFFFFFFFFFFFFFF
FFFFFFFFF:FFFFFFFFFFFFFFFFFFFFFFFFFFFFFFFFFFFFFFFFFFFFFFFFFFFFFFFFFFFFFFFFFFFFF
@A00155:342:HHGFNDSXY:1:2442:15718:19445 1:N:0:GAACCTAG+TCCGCATA
TCGGTAAGCTTGCGGTGAGTCAAAATCTAGTCTCGCTCTAGACCTTCTTGACCATCTGGCAGTCAGCAT
AAGGACGATAGTTGACTCCATGACGTTTAGCCCCCGCAGGTCCACGGCCGGGTGCTCCAGCGCTGGCG
+
:::FFFFFF::,:F,FFF,FFFFFF,FF:FF:F:FFF,F:FFFF,FFFFFFFFFFFFFFFFF:FFF,FFF
FF:FFFFFFFFF:FF,FFFF:FFFFFFFFFFFF,F,:FF:FFFF,,F,FFF,FFFFFF,FF,,FFFF
@A00155:342:HHGFNDSXY:1:2658:17372:13542 1:N:0:GAACCTAG+TCCGCATA
TCGGTAAGCTTGCGGTGAGTCAAAATCTAGTCTCGCTCTAGACCTTCTTGACCATCTGGCAGTCAGCAT
AAGGACGATAGTTGCCTCCATGACGTTTAGCCCCCGCAGGTCCACGGCCGGGTGCTCCAGCGCTGGCG
+
FFFFFFFFFFFFFFFFFFFFFFFFFFFFFFFFFFFFFFFFFFFFFFFFFFFFFFFFFFFFFFFFFFFFFFFFFFFFF
FFFFFFFFFFFFFFFFFFFFFFFFF:FFFFFFFFFFFFFFFFFFFFFFFFFFFFFFFFFFFFFFFFFFFFF,:FFFFFFF
@A00155:342:HHGFNDSXY:1:1654:19506:30483 1:N:0:GAACCTAG+TCCGCATA
TCGGTAAGCTTGCGGTGAGTCAAAATCTAGTCTCGCTCTAGACCTTCTTGACCATCTGGCAGTCAGCAT
AAGGACGATAGTTGCCTCCATGACGTTTAGCCCCCGCAGGTCCACGGCCGGGTGCTCCAGCGCTGGCG
+
FFFFFFFFFFF:FFFFFFFFFFFFFFFFFFFFFFFFFFFFFFFFFFFFFFFFFFFFFFFFFFFFFFFFFFFFFFFFFFF
FFFFFFFFFFFFFFFFFFFFFFFFF:FFFFFFFFFFFFFFFFFFFFFFFFFFFFFFFFFFFFFFFFFFFFFFFFFFF
@A00155:342:HHGFNDSXY:1:2631:20943:19695 2:N:0:GAACCTAG+TCCGCATA
TCGGTAAGCTTGCGGTGAGTCAAAATCTAGTCTCGCTCTAGACCTTCTTGACCATCTGGCAGTCAGCAT
AAGGACGATAGTTGCCTCCATGACGTTTAGCCCCCGCAGGTCCACGGCCGGGTGCTCCAGCGCTGGCG
+
FFFFFFFFFFFFFFFFF:FFFFFFFFFFF:FFFFFFFFFFFFFFFFFFFFFFFFFFFFFFFFFFFFFFFFFFFFFFFFF
FFFFFFFFFFFFFFFFFFFFFFFFF:FFFFFFFFFFFFFFFFFFFFFFFFFFFFFFFFFFFFFFFFFFFFFFFFFFF
@A00155:342:HHGFNDSXY:1:2658:17210:13730 1:N:0:GAACCTAG+TCCGCATA
TCGGTAAGCTTGCGGTGAGTCAAAATCTAGTCTCGCTCTAGACCTTCTTGACCATCTGGCAGTCAGCAT
AAGGACGATAGTTGCCTCCATGACGTTTAGCCCCCGCAGGTCCACGGCCGGGTGCTCCAGCGCTGGCG
+
FF,F,FF,FFFF:F,FFF,FFFFFFFFF::FFFFFF:FFFF:F,F:,FFFFFFFFFFFFFFFFFFFF,F
FFF,FF,FFFFFF,FFFF:FFFFFFFFFFFFFFFFF,FFFFFFFFFFFFFFFFF:FF::FFFFFFFFFFFFFFF
@A00155:342:HHGFNDSXY:1:1615:8567:35963 1:N:0:GAACCTAG+TCCGCATA
CGGTAAGCTTGCGGTGAGTCAAAATCTAGTCTCGCTCTAGACCTTCTTGACCATCTGGCAGTCAGCATA
AGGACGATAGTTGCCTCCATGACGTTTAGCCCCCGCAGGTCCACGGCCGGGTGCTCCAGCGCTGGCG
+
FFFFFFFFFFFFFFFFFFFFFFFFFFFFFFFFFFFFFFFFFFFFFFFFFFFFFFFFFFFFFFFFFFFFFFFFFFFFF
FFFFFFFFFFF:FFFFFFFFFFFFFFFFFFFFFFFFFFFFFFFFFFFFFFFFFFFFFFFFFFFFFFFFFFFFFFFFF
@A00155:342:HHGFNDSXY:1:2360:31693:13980 1:N:0:GAACCTAG+TCCGCATA
CGGTAAGCTTGCGGTGAGTCAAAATCTAGTCTCGCTCTAGACCTTCTTGACCATCTGGCAGTCAGCATA
AGGACGATAGTTGCCTCCATGACGTTTAGCCCCCGCAGGTCCACGGCCGGGTGCTCCAGCGCTGGCG
+
FFFFFFFFF:FFFFFFFFFFFFFFFFFFFFFFFFFFFFFFFFFFFFFFFFFFFFFFFFFFFFFFFFFFFFFFFFFFFFF
FFFFFFFFFFFFFFFFFFFFFFFFF:FFFFFFFFFFFFFFFFFFFFFFFFFFFFFFFFFFFFFFFFFFFFFFFFFFF
```

@A00155:342:HHGFNDSXY:1:2645:16631:8970 2:N:0:GAACCTAG+TCCGCATA  
CGGTAAGCTTGGGTGAGTCAAAATCTAGTCTCGCTCTAGACCTTCTTGACCATCTGGCAGTCAGCATA  
AGGACGATAGTTGCCTCCATGACGTTTAGCCCCCGCAGGTCCACGGCCGGGTGCTCCAGCGCTGGCGT  
+  
FFFFFFFFFFFFFFFF:FFF:FFFFFFFFFFFFFFFFFFFFFFFFFFFFFFFFFFFFFFFFFFFFFFFF  
FFFFFFFFFFFFFFFFFFFFFFFF:FFFFFFFFFFFFFFFFFFFFFFFFFFFFFFFFFFFFFFFFFFFFFFFF  
@A00155:342:HHGFNDSXY:1:1620:9679:4351 1:N:0:GAACCTAG+TCCGCATA  
GGTAAGCTTGGGTGAGTCAAAATCTAGTCTCGCTCTAGACCTTCTTGACCATCTGGCAGTCAGCATAA  
GGACGATAGTTGCCTCCATGACGTTTAGCCCCCGCAGGTCCACGGCCGGGTGCTCCAGCGCTGGCGTG  
+  
FFFFFFFFFFFFFFFFFFFFFFFFFFFFFFFFFFFFFFFFFFFFFFFFFFFFFFFFFFFFFFFFFFFFFFFF  
FFFFFFFFFFFFFFFFFFFFFFFFFFFFFFFFFFFFFFFFFFFFFFFFFFFFFFFFFFFFFFFFFFFFFFFF:FFFFFFFFFFFF  
@A00155:342:HHGFNDSXY:1:1134:24442:23156 1:N:0:GAACCTAG+TCCGCATA  
GTAAGCTTGGGTGAGTCAAAATCTAGTCTCGCTCTAGACCTTCTTGACCATCTGGCAGTCAGCATAAG  
GACGATAGTTGCCTCCATGACGTTTAGCCCCCGCAGGTCCACGGCCGGGTGCTCCAGCGCTGGCGTG  
+  
FFFFFFFFFFFFFFFFFFFFFFFFFFFFFFFFFFFFFFFFFFFFFFFFFFFFFFFFFFFFFFFFFFFFFFFF  
FFFFFFFFFFFFFFFFFFFFFFFFFFFFFFFFFFFFFFFFFFFFFFFFFFFFFFFFFFFFFFFFFFFFFFFF:FFFFFFFFFFFF  
@A00155:342:HHGFNDSXY:1:1134:24415:23202 1:N:0:GAACCTAG+TCCGCATA  
GTAAGCTTGGGTGAGTCAAAATCTAGTCTCGCTCTAGACCTTCTTGACCATCTGGCAGTCAGCATAAG  
GACGATAGTTGCCTCCATGACGTTTAGCCCCCGCAGGTCCACGGCCGGGTGCTCCAGCGCTGGCGTG  
+  
FFFFFFFFFFFFFFFFFFFFFFFFFFFFFFFFFFFFFFFFFFFFFFFFFFFFFFFFFFFFFFFFFFFFFFFF  
FFFFFFFFFFFFFFFFFFFFFFFFFFFFFFFFFFFFFFFFFFFFFFFFFFFFFFFFFFFFFFFFFFFFFFFF:FFFFFFFFFFFF  
@A00155:342:HHGFNDSXY:1:1146:1470:33567 2:N:0:GAACCTAG+TCCGCATA  
TAAGCTTGGGTGAGTCAAAATCTAGTCTCGCTCTAGACCTTCTTGACCATCTGGCAGTCAGCATAAGG  
ACGATAGTTGCCTCCATGACGTTTAGCCCCCGCAGGTCCACGGCCGGGTGCTCCAGCGCTGGCGTGGT  
+  
FFFF:FFFF:FFFF, :FF:F: :FFFFFFFFFFFFFFFFFFFFFFFFFFFFFFFFFFFFFFFFFFFFFFFF  
FFFFFFFFFFFFFFFF:FFFFFFFFFFFFFFFFFFFFFFFFFFFFFFFFFFFFFFFFFFFFFFFF,FFFFFFFFFFFFFFFF  
@A00155:342:HHGFNDSXY:1:1530:10194:35430 2:N:0:GAACCTAG+TCCGCATA  
TAAGCTTGGGTGAGTCAAAATCTAGTCTCGCTCTAGACCTTCTTGACCATCTGGCAGTCAGCATAAGG  
ACGATAGTTGCCTCCATGACGTTTAGCCCCCGCAGGTCCACGGCCGGGTGCTCCAGCGCTGGCGTGGT  
+  
FFFFFFFFFFFF,FFFFFFFFFFFFFFFFFFFFFFFFFFFFFFFFFFFFFFFFFFFFFFFF,FFFFFFFFFFFFFFFF  
FFFFFFFFFFFFFFFFFFFFFFFFFFFFFFFFFFFFFFFFFFFFFFFFFFFFFFFFFFFFFFFFFFFFFFFF  
@A00155:342:HHGFNDSXY:1:1158:6533:34632 2:N:0:GAACCTAG+TCCGCATA  
TAAGCTTGGGTGAGTCAAAATCTAGTCTCGCTCTAGACCTTCTTGACCATCTGGCAGTCAGCATAAGG  
ACGATAGTTGCCTCCATGACGTTTAGCCCCCGCAGGTCCACGGCCGGGTGCTCCAGCGCTGGCGTGGT  
+  
FFFFFFF:FFFFFFFFFFFF,F,:FFFFFFFFFFFFFFFFFFFFFFFFFFFFFFFFFFFFFFFFFFFFFFFF  
FFFF,:F,FFFFFFFFFFFFFFFFFFFFFFFFFFFFFFFFFFFFFFFFFFFFFFFFFFFFFFFFFFFF,FFFFFF:FFFF,FF  
@A00155:342:HHGFNDSXY:1:2527:10836:16219 2:N:0:GAACCTAG+TCCGCATA  
TAAGCTTGGGTGAGTCAAAATCTAGTCTCGCTCTAGACCTTCTTGACCATCTGGCAGTCAGCATAAGG  
ACGATAGTTGCCTCCATGACGTTTAGCCCCCGCAGGTCCACGGCCGGGTGCTCCAGCGCTGGCGTGGT  
+  
FFFFFFFFFFF:F:FFF:FF,FFFFFFFFFFFF:FFFF:FFFFFFFFFFFFFFFFFFFFFFFF,FFFF:FFFFF  
F:FFFF:FFFFFFFFFFFF:FFFFFFFF:FFF,F,FF:FFFFF,:F,FFFF:FFFF:FFFFFFFF  
@A00155:342:HHGFNDSXY:1:1514:24876:4899 2:N:0:GAACCTAG+TCCGCATA  
TAAGCTTGGGTGAGTCAAAATCTAGTCTCGCTCTAGACCTTCTTGACCATCTGGCAGTCAGCATAAGG  
ACGATAGTTGCCTCCATGACGTTTAGCCCCCGCAGGTCCACGGCCGGGTGCTCCAGCGCTGGCGTGGT  
+  
FFFFFFFFFFFFFFFFFFFFFFFFFFFF:FFFFFF:FFFF:FFFFFFFFFFFFFFFFFFFFFFFFFFFFFFFF  
FFFFFFFFFFFFFFFFFFFF:FFFFF:,FFFFFFFFFFFFFFFF:FFFFFFFFFFFFFFFF:FFFFFFFFFFFFF

@A00155:342:HHGFNDSXY:1:1617:7301:18803 2:N:0:GAACCTAG+TCCGCATA  
TAAGCTTGGGTGAGTCAAAATCTAGTCTCGCTCTAGACCTTCTTGACCATCTGGCAGTCAGCATAAGG  
ACGATAGTTGCCTCCATGACGTTTAGCCCCCGCAGGTCCACGGCCGGGTGCTCCAGCGCTGGCGTGGT  
+  
FFFFFFFFFFFFFFFFFFFFFFFFFFFFFFFFFFFFFFFFFFFFFFFFFFFFFFFFFFFFFFFFFFFFFFFF  
FFFFFFFFFFFFFFFFFFFFFFFFFFFFFFFFFFFFFFFFFFFFFFFFFFFFFFFFFFFFFFFFFFFFFFFF  
@A00155:342:HHGFNDSXY:1:1617:6325:19554 2:N:0:GAACCTAG+TCCGCATA  
TAAGCTTGGGTGAGTCAAAATCTAGTCTCGCTCTAGACCTTCTTGACCATCTGGCAGTCAGCATAAGG  
ACGATAGTTGCCTCCATGACGTTTAGCCCCCGCAGGTCCACGGCCGGGTGCTCCAGCGCTGGCGTGGT  
+  
:F,FF,F::FFFF:FFFFFFFF:FFFF,FFFFFFFFFFFFFFFF:FFFFFFFFFFFF:FFFFFFFFFFFFFFFF  
FFFFFFFFFFFFFFFFFFFFFFFFFFFFFFFFFFFFFFFFFFFFFFFFFFFFFFFFFFFFFFFFFFFFFFFF  
@A00155:342:HHGFNDSXY:1:1620:9679:4351 2:N:0:GAACCTAG+TCCGCATA  
TAAGCTTGGGTGAGTCAAAATCTAGTCTCGCTCTAGACCTTCTTGACCATCTGGCAGTCAGCATAAGG  
ACGATAGTTGCCTCCATGACGTTTAGCCCCCGCAGGTCCACGGCCGGGTGCTCCAGCGCTGGCGTGGT  
+  
FFFFFFFFFFFF:FFFFFFFFFFFFFFFFFFFFFFFFFFFFFFFFFFFFFFFFFFFFFFFFFFFFFFFFFFFF  
FFFFFFFFFFFFFFFFFFFFFFFFFFFFFFFFFFFFFFFFFFFFFFFFFFFFFFFFFFFFFFFFFFFFFFFF  
@A00155:342:HHGFNDSXY:1:2611:9326:3740 2:N:0:GAACCTAG+TCCGCATA  
TAAGCTTGGGTGAGTCAAAATCTAGTCTCGCTCTAGACCTCCTTGACCATCTGGCAGTCAGCATAAGG  
ACGATAGTTGCCTCCATGACGTTTAGCCCCCGCAGGTCCACGGCCGGGTGCTCCAGCGCTGGCGTGGT  
+  
FFFFFFFFFFFFFFFFFFFFFFFFFFFFFFFFFFFFFFFFFFFFFFFFFFFFFFFFFFFFFFFFFFFFFFFF  
FFFFFFFFFFFFFFFFFFFFFFFFFFFFFFFFFFFFFFFFFFFFFFFFFFFFFFFFFFFFFFFFFFFFFFFF  
@A00155:342:HHGFNDSXY:1:1471:11134:9502 2:N:0:GAACCTAG+TCCGCATA  
TAAGCTTGGGTGAGTCAAAATCTAGTCTCGCTCTAGACCTTCTTGACCATCTGGCAGTCAGCATAAGG  
ACGATAGTTGCCTCCATGACGTTTAGCCCCCGCAGGTCCACGGCCGGGTGCTCCAGCGCTGGCGTGGT  
+  
FFFFFFFFFFFFFFFFFFFFFFFFFFFFFFFFFFFFFFFFFFFFFFFFFFFFFFFFFFFFFFFFFFFFFFFF  
FFFFFFFFFFFFFFFFFFFFFFFFFFFFFFFFFFFFFFFFFFFFFFFFFFFFFFFFFFFFFFFFFFFFFFFF  
@A00155:342:HHGFNDSXY:1:1651:13910:31125 2:N:0:GAACCTAG+TCCGCATA  
TAAGCTTGGGTGAATCAAAATCTAGTCTCGCTCTAGACCTTCTTGACCATCTGGCAGTCAGCATAAGG  
ACGATAGTTGCCTCCATGACGTTTAGCCCCCGCAGGTCCACGGCCGGGTGCTCCAGCGCTGGCGTGGT  
+  
FFFFFFFFFFFFFFFFFFFFFFFFFFFFFFFFFFFFFFFFFFFFFFFFFFFFFFFFFFFFFFFFFFFFFFFF  
FFFFFFFFFFFFFFFFFFFFFFFFFFFFFFFFFFFFFFFFFFFFFFFFFFFFFFFFFFFFFFFFFFFFFFFF  
@A00155:342:HHGFNDSXY:1:2378:20283:4648 2:N:0:GAACCTAG+TCCGCATA  
TAAGCTTGGGTGAGTCAAAATCTAGTCTCGCTCTAGACCTTCTTGACCATCTGGCAGTCAGCATAAGG  
ACGATAGTTGCCTCCATGACGTTTAGCCCCCGCAGGTCCACGGCCGGGTGCTCCAGCGCTGGCGTGGT  
+  
FFFFFFFFFFFF:FFFFFFFFF,FFFFFFFFFFFFFFFFFFFFFFFFFFFFFFFFFFFFFFFFFFFFFFFF  
FFFFF:FFFFFFFFFFFFFFFFFFFFFFFFFFFFFFFFFFFFFFFFFFFFFFFFFFFFFFFFFFFFFFFF  
@A00155:342:HHGFNDSXY:1:2106:1235:3443 2:N:0:GAACCTAG+TCCGCATA  
TAAGCTTGTGTGAGTCAAAATCTAGTCTCGCTCTAGACCTTCTTGACCATCTGGCAGTCAGCATAAGG  
ACGATAGTTGCCTCCATGACGTTTAGCCCCCGCAGGTCCACGGCCGGGTGCTCCAGCGCTGGCGTGGT  
+  
FFFFFFFFFF,F,FFF,FFFFF::FF,:FF,F,:FFFFFFFFFFFFFFFF:FFF:FFFFFFFFFFFFFFFF  
FFF:FFFFF,FF:FFFFFFFFFFFFFFFFFFFFFFFFFFFFFFFFFFFFFFFFFFFFFFFFFFFFFFFF  
@A00155:342:HHGFNDSXY:1:1411:28275:29481 2:N:0:GAACCTAG+TCCGCATA  
TAAGCTTGGGTGAGTCAAAATCTAGTCTCGCTCTAGACCTTCTTGACCATCTGGCAGTCAGCATAAGG  
ACGATAGTTGCCTCCATGACGTTTAGCCCCCGCAGGTCCACGGCCGGGTGCTCCAGCGCTGGCGTGGT  
+  
FFFFFFFFFFFFFFFFFFFFFFFFFFFFFFFFFFFFFFFFFFFFFFFFFFFFFFFFFFFFFFFFFFFFFFFF  
FFFFFFFFFF,FFFFFFFF:FFFFFFFFFFFFFFFFFFFFFFFFFFFFFFFFFFFFFFFFFFFFFFFFFFFF

[illegible]

[illegible]

[illegible]

[illegible]



[illegible]

@A00155:342:HHGFNDSXY:1:2122:17833:12430 1:N:0:GAACCTAG+TCCGCATA  
TAGTCTCGCTCTAGACCTTCTTGACCATCTGGCAGTCAGCATAAGGACGATAGTTGCCTCCATGACGT  
TtagccccgcaggtccacggccggttgctccagcgctggcgtggttgtagtCAAATGTTGGTAGTCA  
+  
FFFFFFFFFFFFFFFFFFFFFFFFFFFFFFFFFFFFFFFFFFFFFFFFFFFFFFFFFFFFFFFFFFFFF  
FFFFFFFFFFFFFFFFFFFFFFFFFFFFFFFFFFFFFFFFFFFFFFFFFFFFFFFFFFFFFFFFFFFFF:  
@A00155:342:HHGFNDSXY:1:1167:32497:7607 1:N:0:GAACCTAG+TCCGCATA  
AGTCTCGCTCTAGACCTTCTTGACCATCTGGCAGTCAGCATAAGGACGATAGTTGCCTCCATGACGTT  
TAGCCCCCGCAGGTCCACGGCCGGGTGCTCCAGCGCTGGCGTG GTTGTAGTCAAATGTTGG  
+  
FFFFFFFFFFFFFFFFFFFFFFFFFFFFFFFFFFFFFFFFFFFFFFFFFFFFFFFFFFFFFFFFFFFFF  
FFFFFFFFFFFFFFFFFFFFFFFFFFFFFFFFFFFFFFFFFFFFFFFFFFFFFFFFFFFFFFFFFFFFF:  
@A00155:342:HHGFNDSXY:1:1574:8784:10441 1:N:0:GAACCTAG+TCCGCATA  
AGTCTCGCTCTAGACCTTCTTGACCATCTGGCAGTCAGCATAAGGACGATAGTTGCCTCCATGACGTT  
TAGCCCCCGCAGGTCCACGGCCGGGTGCTCCAGCGCTGGCGTG GTTGTAGTCAAATGTTGGTA  
+  
FFFFFFFFFFFFFFFFFFFFFFFFFFFFFFFFFFFFFFFFFFFFFFFFFFFFFFFFFFFFFFFFFFFFF  
FFFFFFFFFFFFFFFFFFFFFFFFFFFFFFFFFFFFFFFFFFFFFFFFFFFFFFFFFFFFFFFFFFFFF:  
@A00155:342:HHGFNDSXY:1:1667:14190:6339 1:N:0:GAACCTAG+TCCGCATA  
AGTCTCGCTCTAGACCTTCTTGACCATCTGGCAGTCAGCATAAGGACGATAGTTGCCTCCATGACGTT  
TAGCCCCCGCAGGTCCACGGCCGGGTGCTCCAGCGCTGGCGTG GTTGTAGTCAAATGTTGGTA  
+  
FFFFFFFFFFFFFFFFFFFFFFFFFFFFFFFFFFFFFFFFFFFFFFFFFFFFFFFFFFFFFFFFFFFFF  
FFFFFFFFFFFFFFFFFFFFFFFFFFFFFFFFFFFFFFFFFFFFFFFFFFFFFFFFFFFFFFFFFFFFF:  
@A00155:342:HHGFNDSXY:1:2654:22408:8453 1:N:0:GAACCTAG+TCCGCATA  
AGTCTCGCTCTAGACCTTCTTGACCATCTGGCAGTCAGCATAAGGACGATAGTTGCCTCCATGACGTT  
TAGCCCCCGCAGGTCCACGGCCGGGTGCTCCAGCGCTGGCGTG GTTGTAGTCAAATGTTGGTA  
+  
FFFFFFFFFFFFFFFFFFFFFFFFFFFFFFFFFFFFFFFFFFFFFFFFFFFFFFFFFFFFFFFFFFFFF  
FFFFFFFFFFFFFFFFFFFFFFFFFFFFFFFFFFFFFFFFFFFFFFFFFFFFFFFFFFFFFFFFFFFFF:  
@A00155:342:HHGFNDSXY:1:1371:24306:33536 1:N:0:GAACCTAG+TCCGCATA  
AGTCTCGCTCTAGACCTTCTTGACCATCTGGCAGTCAGCATAAGGACGATAGTTGCCTCCATGACGTT  
TAGCCCCCGCAGGTCCACGGCCGGGTGCTCCAGCGCTGGCGTG GTTGTAGTCAAATGTTGGTAG  
+  
FFFFFFFFFFFFFFFFFFFFFFFFFFFFFFFFFFFFFFFFFFFFFFFFFFFFFFFFFFFFFFFFFFFFF  
FFFFFFFFFFFFFFFFFFFFFFFFFFFFFFFFFFFFFFFFFFFFFFFFFFFFFFFFFFFFFFFFFFFFF:  
@A00155:342:HHGFNDSXY:1:1371:24288:33786 1:N:0:GAACCTAG+TCCGCATA  
AGTCTCGCTCTAGACCTTCTTGACCATCTGGCAGTCAGCATAAGGACGATAGTTGCCTCCATGACGTT  
TAGCCCCCGCAGGTCCACGGCCGGGTGCTCCAGCGCTGGCGTG GTTGTAGTCAAATGTTGGTAG  
+  
FFFFFFFFFFFFFFFFFFFFFFFFFFFFFFFFFFFFFFFFFFFFFFFFFFFFFFFFFFFFFFFFFFFFF  
FFFFFFFFFFFFFFFFFFFFFFFFFFFFFFFFFFFFFFFFFFFFFFFFFFFFFFFFFFFFFFFFFFFFF:  
@A00155:342:HHGFNDSXY:1:2503:6153:8547 2:N:0:GAACCTAG+TCCGCATA  
AGTCTCGCTCTAGACCTTCTTGACCATCTGGCAGTCAGCATAAGGACGATAGTTGCCTCCATGACGTT  
TAGCCCCCGCAGGTCCACGGCCGGGTGCTCCAGCGCTGGCGTG GTTGTAGTCAAATGTTGGTAG  
+  
FFFFFFFFFFF, FFFFFFFF, FFFFFF: FFFFFFFFFFFFFFFFFFFFFFFFFFFFFFFFFFFFFF: FF  
FFFFFFFFFFFFFFFFFFFFFFFFFFFFFFFFFFFFFFFFFFFFFFFFFFFFFFFFFFFFFFFFFFFFF:  
@A00155:342:HHGFNDSXY:1:1314:30861:18176 1:N:0:GAACCTAG+TCCGCATA  
AGTCTCGCTCTAGACCTTCTTGACCATCTGGCAGTCAGCATAAGGACGATAGTTGCCTCCATGACGTT  
TAGCCCCCGCAGGTCCACGGCCGGGTGCTCCAGCGCTGGCGTG GTTGTAGTCAAATGTTGGTAGT  
+  
FFFFFFFFFFFFFFFFFFFFFFFFFFFFFFFFFFFFFFFFFFFFFFFFFFFFFFFFFFFFFFFFFFFFF  
FFFFFFFFFFFFFFFFFFFFFFFFFFFFFFFFFFFFFFFFFFFFFFFFFFFFFFFFFFFFFFFFFFFFF:  
@A00155:342:HHGFNDSXY:1:1314:30861:18176 1:N:0:GAACCTAG+TCCGCATA  
AGTCTCGCTCTAGACCTTCTTGACCATCTGGCAGTCAGCATAAGGACGATAGTTGCCTCCATGACGTT  
TAGCCCCCGCAGGTCCACGGCCGGGTGCTCCAGCGCTGGCGTG GTTGTAGTCAAATGTTGGTAGT

[illegible]

@A00155:342:HHGFNDSXY:1:2650:19162:28541 2:N:0:GAACCTAG+TCCGCATA  
CTCGCTCTAGACCTTCTTGACCATCTGGCAGTCAGCATAAGGACGATAGTTGCCTCCATGACGTTTAG  
CCCCCGCAGGTCCACGGCCGGGTGCTCCAGCGCTGGCGTGGTTGTAGTCAAATGTTGGTAGTCAGGGT  
+  
FFFFFFFFFFFFFFFFFFFFFFFFFFFFFFFFFFFFFFFFFFFFFFFFFFFFFFFFFFFFFFFFFFFFFFFFFFFFFFFF  
FFFFFFFFFFFFFFFFFFFFFFFFFFFFFFFFFFFFFFFFFFFFFFFFFFFFFFFFFFFFFFFFFFFFFFFFFFFFFFFF  
@A00155:342:HHGFNDSXY:1:1315:11993:27273 2:N:0:GAACCTAG+TCCGCATA  
CTCGCTCTAGACCTTCTTGACCATCTGGCAGTCAGCATAAGGACGATAGTTGCCTCCATGACGTTTAG  
CCCCCGCAGGTCCACGGCCGGGTGCTCCAGCGCTGGCGTGGTTGTAGTCAAATGTTGGTAGTCAGGGT  
+  
FF:FFFFFFFF,FFFFFFFF,FFFF,FFF,:F:FFFFFFFF,: ,FFF,FF:FFF,FFFFFFFFF:  
:F,F,FFFF:F,FF,,F,F:FFFFFF::FF:FFFFFF:FFFFFFFFFFFFFFFFFFFFFFFF:FFFFFF:FFFF  
@A00155:342:HHGFNDSXY:1:2473:6985:11553 2:N:0:GAACCTAG+TCCGCATA  
CGCTCTAGACCTTCTTGACCATCTGGCAGTCAGCATAAGGACGATAGTTGCCTCCATGACGTTTAGCC  
CCCGCAGGTCCACGGCCGGGTGCTCCAGCGCTGGCGTGGTTGTAGTCAAATGTTGGTAGTCAGGGTAG  
+  
FFFFFFFFFFFFFFFFFFFFFFFFFFFFFFFFFFFFFFFFFFFFFFFFFFFFFFFFFFFFFFFFFFFFFFFFFFFFFFFF  
FFFFFFFFFFFFFFFFFFFFFFFFFFFFFFFFFFFFFFFFFFFFFFFFFFFFFFFFFFFFFFFFFFFFFFFFFFFFFFFF  
@A00155:342:HHGFNDSXY:1:2178:10041:9424 2:N:0:GAACCTAG+TCCGCATA  
CGCTCTAGACCTTCTTGACCATCTGGCAGTCAGCATAAGGACGATAGTTGCCTCCATGACGTTTAGCC  
CCCGCAGGTCCACGGCCGGGTGCTCCAGCGCTGGCGTGGTTGTAGTCAAATGTTGGTAGTCAGGGTAG  
+  
FFFFFFFFFFFFFFFFFFFFFFFFFFFFFFFFFFFFFFFFFFFFFFFFFFFFFFFFFFFFFFFFFFFFFFFFFFFFFFFF  
FFFFFFFFFFFFFFFFFFFFFFFFFFFFFFFFFFFFFFFFFFFFFFFFFFFFFFFFFFFFFFFFFFFFFFFFFFFFFFFF  
@A00155:342:HHGFNDSXY:1:1252:30427:18176 2:N:0:GAACCTAG+TCCGCATA  
CGCTCTAGACCTTCTTGACCATCTGGCAGTCAGCATAAGGACGATAGTTGCCTCCATGACGTTTAGCC  
CCCGCAGGTCCACGGCCGGGTGCTCCAGCGCTGGCGTGGTTGTAGTCAAATGTTGGTAGTCAGGGTAG  
+  
FFFFFFFFFFFFFFFFFFFFFFFFFFFFFFFFFFFFFFFFFFFFFFFFFFFFFFFFFFFFFFFFFFFFFFFFFFFFFFFF  
FFFFFFFFFFFFFFFFFFFFFFFFFFFFFFFFFFFFFFFFFFFFFFFFFFFFFFFFFFFFFFFFFFFFFFFFFFFFFFFF  
@A00155:342:HHGFNDSXY:1:1252:30129:28620 2:N:0:GAACCTAG+TCCGCATA  
CGCTCTAGACCTTCTTGACCATCTGGCAGTCAGCATAAGGACGATAGTTGCCTCCATGACGTTTAGCC  
CCCGCAGGTCCACGGCCGGGTGCTCCAGCGCTGGCGTGGTTGTAGTCAAATGTTGGTAGTCAGGGTAG  
+  
FFFFFFFFFFFFFFFFFFFFFFFFFFFFFFFFFFFFFFFFFFFFFFFFFFFFFFFFFFFFFFFFFFFFFFFFFFFFFFFF  
FFFFFFFFFFFFFFFFFFFFFFFFFFFFFFFFFFFFFFFFFFFFFFFFFFFFFFFFFFFFFFFFFFFFFFFFFFFFFFFF  
@A00155:342:HHGFNDSXY:1:2621:5764:34021 2:N:0:GAACCTAG+TCCGCATA  
GCTCTAGACCTTCTTGACCATCTGGCAGTCAGCATAAGGACGATAGTTGCCTCCATGACGTTTAGCCC  
CCCGCAGGTCCACGGCCGGGTGCTCCAGCGCTGGCGTGGTTGTAGTCAAATGTTGGTAGTCAGGGTAGT  
+  
FF:FFFFFFFFFFFFFFFFFFFFFFFFFFFFFFFFFFFFFFFFFFFFFFFFFFFFFFFFFFFFFFFFFFFFFFFFFFFFFFFF  
FFFFFFFFFFFFFFFFFFFFFFFFFFFFFFFFFFFFFFFFFFFFFFFFFFFFFFFFFFFFFFFFFFFFFFFFFFFFFFFF:  
@A00155:342:HHGFNDSXY:1:1262:27010:36683 1:N:0:GAACCTAG+TCCGCATA  
CTAGACCTTCTTGACCATCTGGCAGTCAGCATAAGGACGATAGTTGCCTCCATGACGTTTAGCCCCCG  
CAGGTCCACGGCCGGGTGCTCCAGCGCTGGCGTGGTTGTAGTCAAATGTTGGTAGTCAGGG  
+  
FFFFFFFFFFFFFFFFFFFFFFFFFFFFFFFFFFFFFFFFFFFFFFFFFFFFFFFFFFFFFFFFFFFFFFFFFFFFFFFF  
FFFFF:FFFFFFFFF:FFFFFFFFFFFFFFFFF:FFFFFFFFFFFFFFFFFFFFFFFFFFFFFFFFF  
@A00155:342:HHGFNDSXY:1:1669:13693:11177 1:N:0:GAACCTAG+TCCGCATA  
CTAGACCTTCTTGACCATCTGGCAGTCAGCATAAGGACGATAGTTGCCTCCATGACGTTTAGCCCCCG  
CAGGTCCACGGCCGGGTGCTCCAGCGCTGGCGTGGTTGTAGTCAAATGTTGGTAGTCAGGGTAG  
+  
FFFFFFFFFFFFFFFFFFFFFFFFFFFFFFFFFFFFFFFFFFFFFFFFFFFFFFFFFFFFFFFFFFFFFFFFFFFFFFFF  
F:FFFFFFFFFFFFFFFFF:FFFFFFFFFFFFFFFFF:FFFFFFFFFFFFFFFFFFFFFFFFFFFFFFFFF

[illegible]

[illegible]

[illegible]

@A00155:342:HHGFNDSXY:1:1649:17842:13823 1:N:0:GAACCTAG+TCCGCATA  
CTTGACCATCTGGCAGTCAGCATAAGGACGATAGTTGCCTCCATGACGTTTAGCCCCGCAGGTCCAC  
GGCCGGGTGCTCCAGCGCTGGCGTGGTTGTAGTCAAATGTTGGTAGTCAGGGTAGTTTT



@A00155:342:HHGFNDSXY:1:2127:5647:2597 1:N:0:GAACCTAG+TCCGCATA  
 GACCATCTGGCAGTCAGCATAAGGACGATAGTTGCCTCCATGACGTTTAGCCCCCGCAGGTCCACGGC  
 CGGGTGCTCCAGCGCTGGCGTGGTTGTAGTCAAATGTTGGTAGTCAGGGTAGTTTTCTCCCCTGCTC  
 +  
 FFFFFFFFFFFFFFFFFFFFFFFFFFFFFFFFFFFFFFFFFFFFFFFFFFFFFFFFFFFFFFFFFFFFFFFFFF:FFFFFFFFFFFFFFFFFFFFFFFFFFFFFFFF  
 FFFFFFFFFFFFFFFFFFFFFFFFFFFFFFFFFFFFFFFFFFFFFFFFFFFFFFFFFFFFFFFFFFFFFFFFFF:FFFFFFFF  
 @A00155:342:HHGFNDSXY:1:2514:31087:10645 2:N:0:GAACCTAG+TCCGCATA  
 GCCATCTGGCAGTCAGCATAAGGACGATAGTTGCCTCCATGACGTTTAGCCCCCGCAGGTCCACGGCC  
 GGGTGCTCCAGCGCTGGCGTGGTTGTAGTCAAATGTTGGTAGTCAGGGTAGTTTTCTCC  
 +  
 FFFF:FFFFFFFFFFFFFFFFFFFFFFFFFFFFFFFFFFFFFFFFFFFFFFFFFFFFFFFFFFFFFFFFFFFF  
 FFFFFFFFFFFFFFFFFFFFFFFFFFFFFFFFFFFFFFFFFFFFFFFFFFFFFFFFFFFFFFFFFFFFFFFFFF:FFFFF  
 @A00155:342:HHGFNDSXY:1:2578:7328:25113 2:N:0:GAACCTAG+TCCGCATA  
 ACCATCTGGCAGTCAGCATAAGGACGATAGTTGCCTCCATGACGTTTAGCCCCCGCAGGTCCACGGCC  
 GGGTGCTCCAGCGCTGGCGTGGTTGTAGTCAAATGTTGGTAGTCAGGGTAGTTTTCTCCCCTGCTCC  
 +  
 FFFFFFFFFFFFFF:FFFFFFFFFFFFFFFFFFFFFFFFFFFFFFFFFFFFFFFFFFFFFFFFFFFFFFFFFFFF,FFFFFFFFFFFFFFFFFFFFFFFFFFFF  
 FFFFFFFFFFFFFFFFFFFFFFFFFFFFFFFFFFFFFFFFFFFFFFFFFFFFFFFFFFFFFFFFFFFFFFFFFF:FFFF:FF,FFFF,FFFF  
 @A00155:342:HHGFNDSXY:1:1210:20500:15515 1:N:0:GAACCTAG+TCCGCATA  
 CATCTGGCAGTCAGCATAAGGACGATAGTTGCCTCCATGACGTTTAGCCCCCGCAGGTCCACGGCCGG  
 GTGCTCCAGCGCTGGCGTGGTTGTAGTCAAATGTTGGTAGTCAGGGTAGTTTTCTCCCCTGCTCCAC  
 +  
 FFFFFFFFFFFFFFFFFFFFFFFFFFFFFFFFFFFFFFFFFFFFFFFFFFFFFFFFFFFFFFFFFFFFFFFFFFFFFF  
 FFFFFFFFFFFFFFFFFFFFFFFFFFFFFFFFFFFFFFFFFFFFFFFFFFFFFFFFFFFFFFFFFFFFFFFFFFFFFF  
 @A00155:342:HHGFNDSXY:1:2254:1479:32957 1:N:0:GAACCTAG+TCCGCATA  
 TCTGGCAGTCAGCATAAGGACGATAGTTGCCTCCATGACGTTTAGCCCCCGCAGGTCCACGGCCGGGT  
 GCTCCAGCGCTGGCGTGGTTGTAGTCAAATGTTGGTAGTCAGGGTAGTTTTCTCCCCTGC  
 +  
 FFFFFFFFFFFFFF:FFFFFFFFFFFFFFFFFFFFFFFFFFFFFFFFFFFFFFFFFFFFFFFFFFFFFFFFFFFF:FFFFFFFFFFFFFFFFFFFFF:FFFFFFFFFFFFF  
 FFFFFFFFFFFFFFFFFFFFFFFFFFFFFFFFFFFFFFFFFFFFFFFFFFFFFFFFFFFFFFFFFFFFFFFFFFFFFF:FFFF:F:FF  
 @A00155:342:HHGFNDSXY:1:1363:20518:32988 2:N:0:GAACCTAG+TCCGCATA  
 CTGGCAGTCAGCATAAGGACGATAGTTGCCTCCATGACGTTTAGCCCCCGCAGGTCCACGGCCGGGTG  
 CTCCAGCGCTGGCGTGGTTGTAGTCAAATGTTGGTAGTCAGGGTAGTTTTCTCCCCTGCTCCACCT  
 +  
 F,FFFFFFFFFFFFFFF,FFFFF,FFFF,FFFFFFF:FFFFFFFFFFFFFFFFFFFFFFFFFFFF:FF,FFFFFFFFF:FFF  
 FFFF:F,F,FFFF:F:FFFF,FFFF:F:FFFFFFFFFFFFFFFFFFFFFFFFFFFFFFFFFFFFF:F:FFFFFFFFF,FFF  
 @A00155:342:HHGFNDSXY:1:1339:24966:27070 2:N:0:GAACCTAG+TCCGCATA  
 CTGGCAGTCAGCATAAGGACGATAGTTGCCTCCATGACGTTTAGCCCCCGCAGGTCCACGGCCGGGTG  
 CTCCAGCGCTGGCGTGGTTGTAGTCAAATGTTGGTAGTCAGGGTAGTTTTCTCCCCTGCTCCACCTG  
 +  
 FFFF,FFF:FFFFF:FFFFFFFFF:FFFFF,FFFFFFFFFFFFFFFFFFFF,FFFFFFFFFFFFFFF:FFFFFFFFFFFFFFF  
 FFFFFFFFFFFFFFFFFFFFFFFFFFFFFF::FF:F:FFFFFFFFFFFFFFFFFFFF:FFFFFFFFFFFFFFF:FFFFFFFFFFFFFFF:  
 @A00155:342:HHGFNDSXY:1:2315:3224:10645 2:N:0:GAACCTAG+TCCGCATA  
 CTGGCAGTCAGCATAAGGACGATAGTTGCCTCCATGACGTTTAGCCCCCGCAGGTCCACGGCCGGGTG  
 CTCCAGCGCTGGCGTGGTTGTAGTCAAATGTTGGTAGTCAGGGTAGTTTTCTCCCCTGCTCCACCTG  
 +  
 FFF,F,,,:F:F:FF:,,:FFFFF:,FFF:FFFF,FFFFF:F:FF:F:FFFFFFFFFFFFFFF,:FFFFFFFFF  
 FFFF,FF:FFFFFFFFF,:FFFFFFFFF,,FFFF,FFFFFFFFFFFFFFFFF,F,:FFF:FFFFFFFFF:FFF,FF  
 @A00155:342:HHGFNDSXY:1:1262:15338:13714 2:N:0:GAACCTAG+TCCGCATA  
 TGGCAGTCAGCATAAGGACGATAGTTGCCTCCATGACGTTTAGCCCCCGCAGGTCCACGGCCGGGTGC  
 TCCAGCGCTGGCGTGGTTGTAGTCAAATGTTGGTAGTCAGGGTAGTTTTCTCCCCTGCTCCACCTGG  
 +  
 FFFFFFFFFFFFFFFFFFFFFFFFFFFFFFFFFFFFFFFFFFFFFFFFFFFFFFFFFFFFFFFFFFFFFFFFFF:FFFFFFFFFFFFFFFFFFFFF:FFFFFFFFFFFFFFF:FF  
 FFFFFFFFFFFFFF:FFFFFFFFF:FFFFFFFFFFFFFFFFFFFFFFFFFFFFFFFFFFFFFFFFFFFFFFFFF



@A00155:342:HHGFNDSXY:1:2218:20455:19445 2:N:0:GAACCTAG+TCCGCATA  
GCATAAGGACGATAGTTGCCTCCATGACGTTTAGCCCCGCAGGTCCACGGCCGGGTGCTCCAGCGCT  
GGCGTGGTTGTAGTCAAATGTTGGTAGTCAGGGTAGTTTTCTCCCCTGCTCCACCTGGCCACGAGTC  
+  
FFF:FFFFFFFFFFFFFFFFFFFFFFFFFFFFFFFFFFFFFFFFFFFFFFFFFFFFFFFFFFFFFFFFFFFFFFFF  
FFFFFFFFFFFFFFFFFFFFFFFFFFFFFFFFFFFFFFFFFFFFFFFFFFFFFFFFFFFFFFFFFFFFFFFFFFFF  
@A00155:342:HHGFNDSXY:1:2531:19886:34460 2:N:0:GAACCTAG+TCCGCATA  
GCATAAGGACGATAGTTGCCTCCATGACGTTTAGCCCCGCAGGTCCACGGCCGGGTGCTCCAGCGCT  
GGCGTGGTTGTAGTCAAATGTTGGTAGTCAGGGTAGTTTTCTCCCCTGCTCCACCTGGCCACGAGTC  
+  
FF:FFFFFFFFFFFFFFFFFFFFFFFFFFFFFFFFFFFFFFFFFFFFFFFFFFFFFFFFFFFFFFFFFFFFFFFF  
FFFFFFFFFFFF:FFFFFFFFFFFFFFFFFFFFFFFFFFFFFFFFFFFFFFFFFFFFFFFFFFFFFFFFFFFFFFF  
@A00155:342:HHGFNDSXY:1:2575:14498:20494 1:N:0:GAACCTAG+TCCGCATA  
GCATAAGGACGATAGTTGCCTCCATGACGTTTAGCCCCGCAGGTCCACGGCCGGGTGCTCCAGCGCT  
GGCGTGGTTGTAGTCAAATGTTGGTAGTCAGGGTAGTTTTCTCCCCTGCTCCACCTGGCCACGAGTC  
+  
FFFFFFFFFFFFFFFFFFFFFFFFFFFFFFFFFFFFFFFFFFFFFFFFFFFFFFFFFFFFFFFFFFFFFFFFFFFF  
FFFFFFFFFFFFFFFFFFFFFFFFFFFFFFFFFFFFFFFFFFFFFFFFFFFFFFFFFFFFFFFFFFFFFFFFFFFF  
@A00155:342:HHGFNDSXY:1:2511:8169:35243 2:N:0:GAACCTAG+TCCGCATA  
CATAAGGACGATAGTTGCCTCCATGACGTTTAGCCCCGCAGGTCCACGGCCGGGTGCTCCAGCGCTG  
GCGTGGTTGTAGTCAAATGTTGGTAGTCAGGGTAGTTTTCTCCCCTGCTCCACCTGGCCACGAGTCA  
+  
FFFFFFFFFFFFFFFFFFFFFFFFFFFFFFFFFFFFFFFFFFFFFFFFFFFFFFFFFFFFFFFFFFFFFFFFFFFF  
F:FFFFFFFFFFFFFFFFFFFF,FFFFFFFF:FFFFFFFFFFFFFFFFFFFFFFFFFFFFFFFFFFFFFFFFFFFF  
@A00155:342:HHGFNDSXY:1:2638:21621:19993 2:N:0:GAACCTAG+TCCGCATA  
CATAAGGACGATAGTTGCCTCCATGACGTTTAGCCCCGCAGGTCCACGGCCGGGTGCTCCAGCGCTG  
GCGTGGTTGTAGTCAAATGTTGGTAGTCAGGGTAGTTTTCTCCCCTGCTCCACCTGGCCACGAGTCA  
+  
FFFFFFFFFFFFFFFFFFFFFFFFFFFFFFFFFFFFFFFFFFFFFFFFFFFFFFFFFFFFFFFFFFFFFFFFFFFF  
F:FFFFFFFFFFFFFFFFFFFF,FFFFFFFF:FFFFFFFFFFFFFFFFFFFFFFFFFFFFFFFFFFFFFFFFFFFF  
@A00155:342:HHGFNDSXY:1:2369:7961:30874 2:N:0:GAACCTAG+TCCGCATA  
CATAAGGACGATAGTTGCCTCCATGACGTTTAGCCCCGCAGGTCCACGGCCGGGTGCTCCAGCGCTG  
GCGTGGTTGTAGTCAAATGTTGGTAGTCAGGGTAGTTTTCTCCCCTGCTCCACCTGGCCACGAGTCA  
+  
FFFFFFFFFFFFFFFFFFFF,FFFFFFFFFFFFFFFFFFFFFFFFFFFFFFFFFFFFFFFFFFFFFFFFFFFFFFFF  
FFFFFFFFFFFFFFFFFFFFFFFFFFFFFFFFFFFFFFFFFFFFFFFFFFFFFFFFFFFFFFFFFFFFFFFFFFFF  
@A00155:342:HHGFNDSXY:1:1329:17282:36213 2:N:0:GAACCTAG+TCCGCATA  
CATAAGGACGATAGTTGCCTCCATGACGTTTAGCCCCGCAGGTCCACGGCCGGGTGCTCCAGCGCTG  
GCGTGGTTGTAGTCAAATGTTGGTAGTCAGGGTAGTTTTCTCCCCTGCTCCACCTGGCCACGAGTCA  
+  
FFFFFFFFFFFFFFFFFFFFFFFFFFFFFFFFFFFFFFFFFFFFFFFFFFFFFFFFFFFFFFFFFFFFFFFFFFFF  
FFFFFFFFFFFFFFFFFFFFFFFFFFFFFFFFFFFFFFFFFFFFFFFFFFFFFFFFFFFFFFFFFFFFFFFFFFFF  
@A00155:342:HHGFNDSXY:1:1339:24966:27070 1:N:0:GAACCTAG+TCCGCATA  
CATAAGGACGATAGTTGCCTCCATGACGTTTAGCCCCGCAGGTCCACGTCCGGGTGCTCCAGCGCTG  
GCGTGGTTGTAGTCAAATGTTGGTAGTCAGGGTAGTTTTCTCCCCTGCTCCACCTGGCCACGAGTCA  
+  
FFFFF:FF,FFFFFFFFFFFFFFFFFFFF,FFFFF::FFF:F:F,FF:FFFF,FFFFF::FF:FFFFFFFF  
FFFFF::F:FFFFFFFF,FFFFFFFFFFFFFFFFFFFF:FFF,FFFFFFFFF:FFFFFFFFF:FFFFF:FFF  
@A00155:342:HHGFNDSXY:1:2255:8712:11036 2:N:0:GAACCTAG+TCCGCATA  
AAGGACGATAGTTGCCTCCATGACGTTTAGCCCCGCAGGTCCACGGCCGGGTGCTCCAGCGCTGGCG  
TGGTTGTAGTCAAATGTTGGTAGTCAGGGTAGTTTTCTCCCCTGCTCCACCTGGCCACGAGTCAAAA  
+  
FFFF:FFFF:FFFFFFFFFFFFFFFFFFFFFFFFFFFFFFFFFFFFFFFFFFFFFFFFFFFFFFFFFFFFFFFF  
FFFFFFFFFFFFF::FFFFF,FFFF:FFFFFFFFFFFFFFFFFFFFFFFFFFFFFFFFFFFFFFFFFFFFFFFF:FF

@A00155:342:HHGFNDSXY:1:1176:30327:33411 2:N:0:GAACCTAG+TCCGCATA  
AAGGACGATAGTTGCCTCCATGACGTTTAGCCCCGCAGGTCCACGGCCGGGTGCTCCAGCGCTGGCG  
TGGTTGTAGTCAAATGTTGGTAGTCAGGGTAGTTTTCTCCCCTGCTCCACCTGGCCACGAGTCAAAA  
+  
FFFFFFFFFFFFFF:FFFFFFFFFFFFFFFFFFFFFFFFFFFFFFFFFFFFFFFFFFFFFFFFFFFFFFFF  
FFFFFFF::FF:FFFFFFFFFFFFFFFFFFFFFFFFFFFFFFFFFFFFFFFFFFFFFFFFFFFFFFFFFFFF  
@A00155:342:HHGFNDSXY:1:1248:25690:28917 1:N:0:GAACCTAG+TCCGCATA  
AAGGACGATAGTTGCCTCCATGACGTTTAGCCCCGCAGGTCCACGGCCGGGTGCTCCAGCGCTGGCG  
TGGTTGTAGTCAAATGTTGGTAGTCAGGGTAGTTTTCTCCCCTGCTCCACCTGGCCACGAGTCAAAA  
+  
FFFFFFFFFFFFFF:FFFFFFFFFFFFFFFFFFFFFFFFFFFFFFFFFFFFFFFFFFFFFFFFFFFFFFFF  
FFFFFFFFFFFFFFFF:FFFFFFFFF:FFFFFFFFFFFF:FFFFFFFFFFFFF:FFFFFFFFFFFF  
@A00155:342:HHGFNDSXY:1:2420:22290:15201 1:N:0:GAACCTAG+TCCGCATA  
AGGACGATAGTTGCCTCCATGACGTTTAGCCCCGCAGGTCCACGGCCGGGTGCTCCAGCGCTGGCGT  
GGTTGTAGTCAAATGTTGGTAGTCAGGGTAGTTTTCTCCCCTGCTCCACCTGGCCACGAGTCAAAAC  
+  
FFFFFFFFFFFFFF:FFFFFFFFFFFF:FFFFFFFFFFFFF:FFFFFFFFF:F  
FFFFFFFFFFFFFF:FF:FFFFFFFFFFFF:FFFF:FFFFFFFFFFFFFFFFFFFFFFFFFFFFFFFF:FFFFFFFF  
@A00155:342:HHGFNDSXY:1:2432:25102:25958 1:N:0:GAACCTAG+TCCGCATA  
AGGACGATAGTTGCCTCCATGACGTTTAGCCCCGCAGGTCCACGGCCGGGTGCTCCAGCGCTGGCGT  
GGTTGTAGTCAAATGTTGGTAGTCAGGGTAGTTTTCTCCCCTGCTCCACCTGGCCACGAGTCAAAAC  
+  
FFFFFFFFFFFFFF:FFFFFFFFFFFFFFFFFFFFFFFFFFFFFFFFFFFFFFFFFFFFFFFFFFFFFFFF  
FFF:FFFFFFFFFFFFFFFFFFFFFFFFFFFFFFFFFFFFFFFFFFFFFFFFFFFFFFFFFFFFFFFFFFFF  
@A00155:342:HHGFNDSXY:1:2420:22146:15702 1:N:0:GAACCTAG+TCCGCATA  
AGGACGATAGTTGCCTCCATGACGTTTAGCCCCGCAGGTCCACGGCCGGGTGCTCCAGCGCTGGCGT  
GGTTGTAGTCAAATGTTGGTAGTCAGGGTAGTTTTCTCCCCTGCTCCACCTGGCCACGAGTCAAAAC  
+  
FFFFFFFFFFFFFF:FFFFFFFFFFFFFFFFFFFFFFFFFFFFFFFFFFFFFFFFFFFFFFFFFFFFFFFF  
FFFFFFFFFFFFFFFFFFFFFFFFFFFFFFFFFFFFFFFFFFFFFFFFFFFFFFFFFFFFFFFFFFFF:FF  
@A00155:342:HHGFNDSXY:1:1358:23800:36793 1:N:0:GAACCTAG+TCCGCATA  
AGGACGATAGTTGCCTCCATGACGTTTAGCCCCGCAGGTCCACGGCCGGGTGCTCCAGCGCTGGCGT  
GGTTGTAGTCAAATGTTGGTAGTCAGGGTAGTTTTCTCCCCTGCTCCACCTGGCCACGAGTCAAAAC  
+  
FFFFFFFFFFFFFF:FFFFFFFFFFFFFFFFFFFFFFFFFFFFFFFFFFFFFFFFFFFFFFFFFFFFFFFF  
FFFFFFFFFFFFFFFFFFFFFFFFFFFFFFFFFFFFFFFFFFFFFFFFFFFFFFFFFFFFFFFFFFFF:FFFFFFFF  
@A00155:342:HHGFNDSXY:1:1609:23095:11052 1:N:0:GAACCTAG+TCCGCATA  
GGACGATAGTTGCCTCCATGACGTTTAGCCCCGCAGGTCCACGGCCGGGTGCTCCAGCGCTGGCGTG  
GTTGTAGTCAAATGTTGGTAGTCAGGGTAGTTTTCTCCCCTGCTCCACCTGGCCACGAGTCAAACT  
+  
FFFFFFFFFFFFFF:FFFFFFFFFFFFFFFFFFFFFFFFFFFFFFFFFFFFFFFFFFFFFFFFFFFFFFFF  
FFFFFFFFFFFF:FFFFFFFFFFFFFFFFFFFFFFFFFFFFFFFFFFFFFFFFFFFFFFFFFFFFFFFFFFFF  
@A00155:342:HHGFNDSXY:1:2642:7554:26224 1:N:0:GAACCTAG+TCCGCATA  
GACGATAGTTGCCTCCATGACGTTTAGCCCCGCAGGTCCACGGCCGGGTGCTCCAGCGCTGGCGTGG  
TTGTAGTCAAATGTTGGTAGTCAGGGTAGTTTTCTCCCCTGCTCCACCTGGCCACGAGTCAAACTA  
+  
FFFFFFFFFFFFFF:FFFFFFFFFFFF  
FFFFFFFFFFFFFFFFFFFFFFFFFFFFFFFFFFFFFFFFFFFFFFFFFFFFFFFFFFFF:FFFFFFFFFFFF:FFF  
@A00155:342:HHGFNDSXY:1:2319:26603:28682 2:N:0:GAACCTAG+TCCGCATA  
GACGATAGTTGCCTCCATGACGTTTAGCCCCGCAGGTCCACGGCCGGGTGCTCCAGCGCTGGCGTGG  
TTGTAGTCAAATGTTGGTAGTCAGGGTAGTTTTCTCCCCTGCTCCACCTGGCCACGAGTCAAACTA  
+  
FFFFFFFFFFFFFF:FFFFFFFFFFFF:FFF:F:FFFFFFFFFFFFFFFFFFFFFFFFFFFFFFFFFFFFF

[illegible]

[illegible]

@A00155:342:HHGFNDSXY:1:1352:13322:17425 1:N:0:GAACCTAG+TCCGCATA  
TTGCCTCCATGACGTTTAGCCCCCGCAGGTCCACGGCCGGGTGCTCCAGCGCTGGCGTGTTGTAGTC  
AAATGTTGGTAGTCAGGGTAGTTTTCTCCCCTGCTCCACCTGGCCACGAGTCAAAACTAG

+

[illegible]

@A00155:342:HHGFNDSXY:1:1358:3052:6464 1:N:0:GAACCTAG+TCCGCATA  
TTGCTCCATGACGTTTAGCCCCCGCAGGTCACGGCCGGGTGCTCCAGCGCTGGCGTGGTTGTAGTC

+

[illegible]

@A00155:342:HHGFNDSXY:1:2646:21902:22670 1:N:0:GAACCTAG+TCCGCATA  
TTGCCTCCATGACGTTTAGCCCCCGCAGGTCACGGCCGGGTGCTCCAGCGCTGGCGTGGTTGTAGTC

+

[illegible]

@A00155:342:HHGFNDSXY:1:2110:31105:36010 1:N:0:GAACCTAG+TCCGCATA  
TTGCTCCATGACGTTTAGCCCCCGCAGGTCCACGGCCGGGTGCTCCAGCGCTGGCGTGGTTGTAGTC

+

[illegible]

@A00155:342:HHGFNDSXY:1:1121:19551:20917 1:N:0:GAACCTAG+TCCGCATA  
TTGCTCCATGACGTTTAGCCCCCGCAGGTCCACGGCCGGGTGCTCCAGCGCTGGCGTGGTTGTAGTC

+

[illegible]

@A00155:342:HHGFNDSDXY:1:1514:9254:1141 1:N:0:GAACCTAG+TCCGCATA  
TTGCCTCCATGACGTTTAGCCCCCGCAGGTCCACGGCCGGGTGCTCCAGCGCTGGCGTGGTTGTAGTC

+

[illegible]

@A00155:342:HHGFNDSXY:1:1176:30327:33411 1:N:0:GAACCTAG+TCCGCATA  
TTGCCTCCATGACGTTTAGCCCCCGCAGGTCACGGCCGGGTGCTCCAGCGCTGGCGTGGTTGTAGTC

+

[illegible]

@A00155:342:HHGFNDSXY:1:1401:5981:26569 1:N:0:GAACCTAG+TCCGCATA  
TTGCTCCATGACGTTTAGCCCCCGCAGGTCACGGCCGGGTGCTCCAGCGCTGGCGTGGTTGTAGTC

 $+$ [illegible]

@A00155:342:HHGFNDXSY:1:2225:24804:36933 2:N:0:GAACCTAG+TCCGCATA  
TGCCCTCCATGACGTTTAGCCCCCGCAGGTTCACGGCCGGGTGCTCCAGCGCTGGCGTGGTTGTAGTCA

 $\perp$ 

FFFFFFFFFFFFFFFFFFFFFFFFFFFFFFFFFFFFFFFFFFFFFFFFFFFFFFFFFFFFFFFFFFFFFFFFFFFFFFFF  
 FFFFFFFFFFFFFFFFFFFFFFFFFF.FFFFFFFFFFFFFFFFFFFFFFFFFFFFFFFFFFFFFFFFFFFFFFFFFF





[illegible]

@A00155:342:HHGFNDSXY:1:1470:18475:2550 1:N:0:GAACCTAG+TCCGCATA  
 TAGCCCCCGCAGGTCCACGGCCGGGTGCTCCAGCGCTGGCGTGTTGTAGTCAAATGTTGGTAGTCAG  
 GGTAGTTTTCTCCCTGCTCCACCTGGCCACGAGTCAAACTAGCCTCTTCTTCATATCTCTCCGGC  
 +  
 FFFFFFFFFFFFFFFFFF,FFFFFFFFFFFFFFFFFFFFFFFFFFFFFFFFFFFFFFFFFFFFFFFFF:FFFFFFFFFFFF  
 FFFFFFFFFFFFFFFFFF:FFFFFFFFFFFFFFFFFFFFFFFFFFFFFFFFFFFFFFFFFFFFFFFFF  
 @A00155:342:HHGFNDSXY:1:2225:2483:19319 1:N:0:GAACCTAG+TCCGCATA  
 AGCCCCCGCAGGTCCACGGCCGGGTGCTCCAGCGCTGGCGTGTTGTAGTCAAATGTTGGTAGTCAGG  
 GTAGTTTTCTCCCTGCTCCACCTGGCCACGAGTCAAACTAGCCTCTTCTTCATATCTCTCCG  
 +  
 FFFFFFFFFFFFFFFFFF:FFFFFFFFFFFFFFFFFFFFFFFFFFFFFFFFFFFFFFFFFFFFFFFFF  
 FFFFFFFFFFFFFFFFFF,FFFFFFFFFFFFFFFFFFFFFFFFFFFFFFFFFFFFFFFFFFFFFFFFF  
 @A00155:342:HHGFNDSXY:1:1405:32497:35102 1:N:0:GAACCTAG+TCCGCATA  
 AGCCCCCGCAGGTCCACGGCCGGGTGCTCCAGCGCTGGCGTGTTGTAGTCAAATGTTGGTAGTCAGG  
 GTAGTTTTCTCCCTGCTCCACCTGGCCACGAGTCAAACTAGCCTCTTCTTCATATCTCTCCGGCC  
 +  
 FFFFFFFFFFFFFFFFFF:F:FFFFFFFFFFFFFFFFFFFFFFFFFFFFFFFFFFFFFFFFFFFFFFFFF  
 FFFFFFFFFFFFFFFFFF:FFFFFFFFFFFFFFFFFFFFFFFFFFFFFFFFFFFFFFFFFFFFFFFFF:FFFFFFFFFFFF  
 @A00155:342:HHGFNDSXY:1:1101:6289:30545 1:N:0:GAACCTAG+TCCGCATA  
 AGCCCCCGCAGGTCCACGGCCGGGTGCTCCAGCGCTGGCGTGTTGTAGTCAAATGTTGGTAGTCAGG  
 GTAGTTTTCTCCCTGCTCCACCTGGCCACGAGTCAAACTAGCCTCTTCTTCATATCTCTCCGGCC  
 +  
 FFFF:FFFFFFFFF,FFFF:FFF:FFFFFFFFF:,FFFF,FFFFFFFFFFFFFFFFFFFFFFFFF  
 F:FFFFFFFFFFFFFFFFFFFFFFFFFFFFFFFFFFFFFFFFFFFFFFFFFFFFFFFFFFFFFFFFF  
 @A00155:342:HHGFNDSXY:1:2631:13602:23954 2:N:0:GAACCTAG+TCCGCATA  
 AGCCCCCGCAGGTCCACGGCCGGGTGCTCCAGCGCTGGCGTGTTGTAGTCAAATGTTGGTAGTCAGG  
 GTAGTTTTCTCCCTGCTCCACCTGGCCACGAGTCAAACTAGCCTCTTCTTCATATCTCTCCGGCC  
 +  
 FFFFFFFFFFFFFFFFFF:FFFFFFFFFFFFFFFFFFFFFFFFFFFFFFFFFFFFFFFFFFFFFFFFF  
 FFFFFFFFFFFFFFFFFF:FFFFFFFFFFFFFFFFFFFFFFFFFFFFFFFFFFFFFFFFFFFFFFFFF  
 @A00155:342:HHGFNDSXY:1:1313:15619:17362 1:N:0:GAACCTAG+TCCGCATA  
 AGCCCCCGCAGGTCCACGGCCGGGTGCTCCAGCGCTGGCGTGTTGTAGTCAAATGTTGGTAGTCAGG  
 GTAGTTTTCTCCCTGCTCCACCTGGCCACGAGTCAAACTAGCCTCTTCTTCATATCTCTCCGGCC  
 +  
 FFFFFFFFFFFFFFFFFF:FFFFFFFFFFFFFFFFFFFFFFFFFFFFFFFFFFFFFFFFFFFFFFFFF  
 FFFFFFFFFFFFFFFFFF,FFFFFFFFFFFFFFFFF,FFFFFFFFFFFFFFFFF:F,FFFF,FFFFFFFFF  
 @A00155:342:HHGFNDSXY:1:1162:25545:19147 1:N:0:GAACCTAG+TCCGCATA  
 AGCCCCCGCAGGTCCACGGCCGGGTGCTCCAGCGCTGGCGTGTTGTAGTCAAATGTTGGTAGTCAGG  
 GTAGTTTTCTCCCTGCTCCACCTGGCCACGAGTCAAACTAGCCTCTTCTTCATATCTCTCCGGCC  
 +  
 FFFFFFFFFFFFFFFFFF:FFFFFFFFFFFFFFFFFFFFFFFFFFFFFFFFFFFFFFFFFFFFFFFFF  
 FFFFFFFFFFFFFFFFFF:FFFFFFFFFFFFFFFFFFFFFFFFFFFFFFFFFFFFFFFFFFFFFFFFF  
 @A00155:342:HHGFNDSXY:1:2507:4960:31657 1:N:0:GAACCTAG+TCCGCATA  
 AGCCCCCGCAGGTCCACGGCCGGGTGCTCCAGCGCTGGCGTGTTGTAGTCAAATGTTGGTAGTCAGG  
 ATAGTTTTCTCCCTGCTCCACCTGGCCACGAGTCAAACTAGCCTCTTCTTCATATCTCTCCGGCC  
 +  
 FFFF:FFFFFFFFFFFFFFFFFFFFFFFFF:FFF:FFF:FF,,,:FF:F:FFF:FFFFFFFFF  
 FFFFFFFFFFFFFF:FFFFFFF:FFFFFFFFFFFF:FFFFFFF:FFFFF:,F,:FFF:FF:FFFFFFFFF  
 @A00155:342:HHGFNDSXY:1:2123:20066:16861 1:N:0:GAACCTAG+TCCGCATA  
 AGCCCCCGCAGGTCCACGGCCGGGTGCTCCAGAGCTGGCGTGTTGTAGTCAAATGTTGGTAGTCAGG  
 GTAGTTTTCTCCCTGCTCCACCTGGCCACGAGTCAAACTAGCCTCTTCTTCATATCTCTCCGGCC  
 +  
 FFFFFFFFFFFFFFFFFF,FFFFFFFFFFFFFFFFFFFFFFFFF:FF  
 FFFFFFFFFFFFFFFFFF:FFFFFFFFFFFFFFFFFFFFFFFFF

+  
F  
+  
F  
@A00155:342:HHGFNDSXY:1:2363:8721:17221 1:N:0:GAACCTAG+TCCGCATA  
AGCCCCCGCAGGTCCACGGCCGGGTGCTCCAGCGCTGGCGTGTTGTAGTCAAATGTTGGTAGTCAGG  
GTAGTTTTCTCCCCTGCTCCACCTGGCCACGAGTCAAACTAGCCTCTTCTCATATCTCTCCGGCC  
+  
F  
F  
@A00155:342:HHGFNDSXY:1:2174:8648:8578 1:N:0:GAACCTAG+TCCGCATA  
AGCCCCCGCAGGTCCACGGCCGGGTGCTCCAGCGCTGGCGTGTTGTAGTCAAATGTTGGTAGTCAGG  
GTAGTTTTCTCCCCTGCTCCACCTGGCCACGAGTCAAACTAGCCTCTTCTCATATCTCTCCGGCC  
+  
F  
F  
@A00155:342:HHGFNDSXY:1:1412:13530:31939 1:N:0:GAACCTAG+TCCGCATA  
AGCCCCCGCAGGTCCACGGCCGGGTGCTCCAGCGCTGGCGTGTTGTAGTCAAATGTTGGTAGTCAGG  
GTAGTTTTCTCCCCTGCTCCACCTGGCCACGAGTCAAACTAGCCTCTTCTCATATCTCTCCGGCC  
+  
F  
F  
@A00155:342:HHGFNDSXY:1:1101:5674:30013 1:N:0:GAACCTAG+TCCGCATA  
AGCCCCCGCAGGTCCACGGCCGGGTGCTCCAGCGCTGGCGTGTTGTAGTCAAATGTTGGTAGTCAGG  
GTAGTTTTCTCCCCTGCTCCACCTGGCCACGAGTCAAACTAGCCTCTTCTCATATCTCTCCGGCC  
+  
F  
F  
@A00155:342:HHGFNDSXY:1:2472:12427:12868 1:N:0:GAACCTAG+TCCGCATA  
AGCCCCCGCAGGTCCACGGCCGGGTGCTCCAGCGCTGGCGTGTTGTAGTCAAATGTTGGTAGTCAGG  
GTAGTTTTCTCCCCTGCTCCACCTGGCCACGAGTCAAACTAGCCTCTTCTCATATCTCTCCGGCC  
+  
F  
F  
@A00155:342:HHGFNDSXY:1:2253:2546:1266 1:N:0:GAACCTAG+TCCGCATA  
AGCCCCCGCAGGTCCACGGCCGGGTGCTCCAGCGCTGGCGTGTTGTAGTCAAATGTTGGTAGTCAGG  
GTAGTTTTCTCCCCTGCTCCACCTGGCCACGAGTCAAACTAGCCTCTTCTCATATCTCTCCGGCC  
+  
F  
F  
@A00155:342:HHGFNDSXY:1:2247:27335:29356 1:N:0:GAACCTAG+TCCGCATA  
AGCCCCCGCAGGTCCACGGCCGGGTGCTCCAGCGCTGGCGTGTTGTAGTCAAATGTTGGTAGTCAGG  
GTAGTTTTCTCCCCTGCTCCACCTGGCCACGAGTCAAACTAGCCTCTTCTCATATCTCTCCGGCC  
+  
F  
F  
@A00155:342:HHGFNDSXY:1:1431:13856:4789 1:N:0:GAACCTAG+TCCGCATA  
AGCCCCCGCAGGTCCACGGCCGGGTGCTCCAGCGCTGGCGTGTTGTAGTCAAATGTTGGTAGTCAGG  
GTAGTTTTCTCCCCTGCTCCACCTGGCCACGAGTCAAACTAGCCTCTTCTCATATCTCTCCGGCC  
+  
F

[illegible]

```
@A00155:342:HHGFNDSXY:1:1458:11134:15828 2:N:0:GAACCTAG+TCCGCATA
CCCCGAGGTCCACGGCCGGGTGCTCCAGCGCTGGCGTGTTGTAGTCAAATGTTGGTAGTCAGGGTAG
TTTTCTCCCCTGCTCCACCTGGCCACGAGTCAAACTAGCCTCTTCTTCATATCTCTCCGCCACCA
+
FFFF:FFFFFFFFFFFFFFFFFFFFFFFFFFFFFFFFFFFFFFFFFFFFFFFFFFFFFFFFFFFFFFFFF
F::FFFFFFFFFFFFFFFFFFFFFFFFFFFFFFFFFFFFFFFFFFFFFFFFFFFFFFFFFFFFFFFFF
@A00155:342:HHGFNDSXY:1:2521:21820:8656 1:N:0:GAACCTAG+TCCGCATA
CCCCGAGGTCCACGGCCGGGTGCTCCAGCGCTGGCGTGTTGTAGTCAAATGTTGGTAGTCAGGGTAG
TTTTCTCCCCTGCTCCACCTGGCCACGAGTCAAACTAGCCTCTTCTTCATATCTCTCCGCCACCA
+
FFFFFFFFFFFFFFFFFFFFFFFFFFFFFFFFFFFFFFFFFFFFFFFFFFFFFFFFFFFFFFFFFFFFFF:F
FFFFFFFFFFFFFFFFFFFFFFFFFFFFFFFFFFFFFFFFFFFFFFFFFFFFFFFFFFFFFFFFFFFFFFF
@A00155:342:HHGFNDSXY:1:2456:4101:16548 1:N:0:GAACCTAG+TCCGCATA
CCCCGAGGTCCACGGCCGGGTGCTCCAGCGCTGGCGTGTTGTAGTCAAATGTTGGTAGTCAGGGTAG
TTTTCTCCCCTGCTCCACCTGGCCACGAGTCAAACTAGCCTCTTCTTCATATCTCTCCGCCACCA
+
FFFFFFFFFFFFFFFFFFFFFFFFFFFFFFFFFFFFFFFFFFFFFFFFFFFFFFFFFFFFFFFFFFFFFF:F
FFFFFFFFFFFFFFFFFFFFFFFFFFFFFFFFFFFFFFFFFFFFFFFFFFFFFFFFFFFFFFFFFFFFFFF
@A00155:342:HHGFNDSXY:1:1370:28411:4038 2:N:0:GAACCTAG+TCCGCATA
CCGAGGTCCACGGCCGGGTGCTCCAGCGCTGGCGTGTTGTAGTCAAATGTTGGTAGTCAGGGTAGT
TTCTCTCCCCTGCTCCACCTGGCCACGAGTCAAACTAGCCTCTTCTTCATATCTCTCCG
+
FFFFFFFFFFF:FFFFFFFFFFFFFFFFFFFFFFFFFFFFFFFFFFFFFFFFFFFFFFFFFFFFFFFFFFFF
FFFFFFFFFFFFFFFFFFFFFFFFFFFFFFFFFFFFFFFFFFFFFFFFFFFFFFFFFFFFFFFFFFFFFFF
@A00155:342:HHGFNDSXY:1:1314:18584:6089 1:N:0:GAACCTAG+TCCGCATA
CCGAGGTCCACGGCCGGGTGCTCCAGCGCTGGCGTGTTGTAGTCAAATGTTGGTAGTCAGGGTAGT
TTCTCTCCCCTGCTCCACCTGGCCACGAGTCAAACTAGCCTCTTCTTCATATCTCTCCGGCCACCAC
+
FFFFFFFFFFFF,FFFFFFFFFFFFFFFFFFFFFFFFFFFFFFFFFFFFFFFFFFFFFFFFFFFFFFFFFFFFF
FFFFFFFFFFFFFFFFFFFFFFFFFFFFFFFFFFFFFFFFFFFFFFFFFFFFFFFFFFFFFFFFFFFFFFF
@A00155:342:HHGFNDSXY:1:1348:27254:2284 1:N:0:GAACCTAG+TCCGCATA
CGCAGGTCCACGGCCGGGTGCTCCAGCGCTGGCGTGTTGTAGTCAAATGTTGGTAGTCAGGGTAGTT
TTCTCTCCCCTGCTCCACCTGGCCACGAGTCAAACTAGCCTCTTCTTCATATCTCTCCG
+
FFFFFFFFFFFF,FFFFFFFFFFFFFFFFFFFFFFFFFFFFFFFFFFFFFFFFFFFFFFFFFFFFFFFFFFFFF
FFFFFFFFFFFFFFFFFFFFFFFFFFFFFFFFFFFFFFFFFFFFFFFFFFFFFFFFFFFFFFFFFFFFFFF
@A00155:342:HHGFNDSXY:1:1348:27254:2284 1:N:0:GAACCTAG+TCCGCATA
CGCAGGTCCACGGCCGGGTGCTCCAGCGCTGGCGTGTTGTAGTCAAATGTTGGTAGTCAGGGTAGTT
TTCTCTCCCCTGCTCCACCTGGCCACGAGTCAAACTAGCCTCTTCTTCATATCTCTCCG
+
FFFFFFFFFFFF:FFFFFFFFFFFF:F:FFFFFFFFFFFFFFFFFFFFFFFFFFFFFFFF,FFFFFFFFFFFFFF:FFFFF
:FFFF:FFFFFFFFFFFF:FFFFFFFFFFFFFFFFFFFFFFFFFFFFFFFFFFFFFFFFFFFFFFFFFFFF
@A00155:342:HHGFNDSXY:1:2371:19958:26600 1:N:0:GAACCTAG+TCCGCATA
CGCAGGTCCACGGCCGGGTGCTCCAGCGCTGGCGTGTTGTAGTCAAATGTTGGTAGTCAGGGTAGTT
TTCTCTCCCCTGCTCCACCTGGCCACGAGTCAAACTAGCCTCTTCTTCATATCTCTCCGCCACCAC
+
FFFFFFFFFFFFFFFFFFFFFFFFFFFFFFFFFFFFFFFFFFFFFFFFFFFFFFFFFFFFFFFFFFFFFFF
FFFFFFFFFFFFFFFFFFFFFFFFFFFFFFFFFFFFFFFFFFFFFFFFFFFFFFFFFFFFFFFFFFFFFFF
@A00155:342:HHGFNDSXY:1:2161:13169:9862 1:N:0:GAACCTAG+TCCGCATA
CGCAGGTCCACGGCCGGGTGCTCCAGCGCTGGCGTGTTGTAGTCAAATGTTGGTAGTCAGGGTAGTT
TTCTCTCCCCTGCTCCACCTGGCCACGAGTCAAACTAGCCTCTTCTTCATATCTCTCCGCCACCAC
+
FFFFFFFFFFFFFFFFFFFFFFFFFFFFFFFFFFFFFFFFFFFFFFFFFFFFFFFFFFFFFFFFFFFFFFF
FFFFFFFFFFFFFFFFFFFFFFFFFFFFFFFFFFFFFFFFFFFFFFFFFFFFFFFFFFFFFFFFFFFFFFF
@A00155:342:HHGFNDSXY:1:1632:18087:19758 1:N:0:GAACCTAG+TCCGCATA
CGCAGGTCCACGGCCGGGTGCTCCAGCGCTGGCGTGTTGTAGTCAAATGTTGGTAGTCAGGGTAGTT
TTCTCTCCCCTGCTCCACCTGGCCACGAGTCAAACTAGCCTCTTCTTCATATCTCTCCGCCACCAC
+
FFFFFFFFFFFFFFFFFFFFFFFFFFFFFFFFFFFFFFFFFFFFFFFFFFFFFFFFFFFFFFFFFFFFFFF
FFFFFFFFFFFFFFFFFFFFFFFFFFFFFFFFFFFFFFFFFFFFFFFFFFFFFFFFFFFFFFFFFFFFFFF
@A00155:342:HHGFNDSXY:1:1632:18087:19758 1:N:0:GAACCTAG+TCCGCATA
CGCAGGTCCACGGCCGGGTGCTCCAGCGCTGGCGTGTTGTAGTCAAATGTTGGTAGTCAGGGTAGTT
TTCTCTCCCCTGCTCCACCTGGCCACGAGTCAAACTAGCCTCTTCTTCATATCTCTCCGCCACCAC
```

@A00155:342:HHGFNDSXY:1:1352:15908:25254 1:N:0:GAACCTAG+TCCGCATA  
CGCAGGTCCACGGCCGGGTGCTCCAGCGCTGGCGTGTTGTAGTCAAATGTTGGTAGTCAGGGTAGTT  
TTCTCCCCTGCTCCACCTGGCCACGAGTCAAACTAGCCTCTTCTTCATATCTCTCCGCCACCACT  
+  
FFFFFFFFFFFFFFFFFFFFFFFFFFFFFFFFFFFFFFFFFFFFFFFFFFFFF:FFFFFFFFF:FFFFFFFFFFFFFFFFFFFFFFF  
FFFFFFFFFFFFFFFFFFFFFFFFFFFFFFFFFFFFFFFFFFFFFFFFFFFFF:FFFFFFFFFFFFFFFFFFF,FFFFF  
@A00155:342:HHGFNDSXY:1:1608:31376:3223 1:N:0:GAACCTAG+TCCGCATA  
CGCAGGTCCACGGCCGGGTGCTCCAGCGCTGGCGTGTTGTAGTCAAATGTTGGTAGTCAGGGTAGTT  
TTCTCCCCTGCTCCACCTGGCCACGAGTCAAACTAGCCTCTTCTTCATATCTCTCCGCCACCACT  
+  
FFFFFFFFFFFFFFFFFFFFFFFFFFFFFFFFFFFFFFFFFFFFFFFFFFFFF:FFFFFFFFFFFFFFFFFFFFFFFFFFFFFFF  
FFFFFFFFFFFFFFFFFFFFFFFFFFFFFFFFFFFFFFFFFFFFFFFFFFFFF:FFFFFFFFFFFFFFFFFFF:FFFFF:  
@A00155:342:HHGFNDSXY:1:1458:11134:15828 1:N:0:GAACCTAG+TCCGCATA  
CGCAGGTCCACGGCCGGGTGCTCCAGCGCTGGCGTGTTGTAGTCAAATGTTGGTAGTCAGGGTAGTT  
TTCTCCCCTGCTCCACCTGGCCACGAGTCAAACTAGCCTCTTCTTCATATCTCTCCGCCACCACT  
+  
FFFFFFFFFFFFFFFFFFFFFFFFFFFFFFFFFFFFFFFFFFFFFFFFFFFFF:FFFFFFFFFFFFFFFFFFFFFFFFFFFFFFF  
FFFFFFFFFFFFFFFFFFFFFFFFFFFFFFFFFFFFFFFFFFFFFFFFFFFFF:FFFFFFFFFFFFFFFFFFF:FFFFF:  
@A00155:342:HHGFNDSXY:1:1570:12707:25629 1:N:0:GAACCTAG+TCCGCATA  
CGCAGGTCCACGGCCGGGTGCTCCAGCGCTGGCGTGTTGTAGTCAAATGTTGGTAGTCAGGGTAGTT  
TTCTCCCCTGCTCCACCTGGCCACGAGTCAAACTAGCCTCTTCTTCATATCTCTCCGCCACCACT  
+  
FFFFFFFFFFFFFFFFFFFFFFFFFFFFFFFFFFFFFFFFFFFFFFFFFFFFF:FF:FFFFF:FFFFFFFFFFFFFFFFFFFFFFF  
FFFFFFFFFFFFFFFFFFFFFFFFFFFFFFFFFFFFFFFFFFFFFFFFFFFFF:FFFFFFFFFFFFFFFFFFFFFFF  
@A00155:342:HHGFNDSXY:1:2636:29957:28103 1:N:0:GAACCTAG+TCCGCATA  
CGCAGGTCCACGGCCGGGTGCTCCAGCGCTGGCGTGTTGTAGTCAAATGTTGGTAGTCAGGGTAGTT  
TTCTCCCCTGCTCCACCTGGCCACGAGTCAAACTAGCCTCTTCTTCATATCTCTCCGCCACCACT  
+  
FFFFF,FFFFFFFFF:FFFFF:FFFFF,:::FFF,,:FF:FFFFFFFFFFFFFFFFFFFF:FF:FF:F:F  
FFFFFFFF:::F,FFFFFFFF:FF:FFF:FF::FFFFFFFFF:FFFFFFFFFFFFFFFFFFFF:FF:FFFF:FFFFF  
@A00155:342:HHGFNDSXY:1:2161:12653:9502 1:N:0:GAACCTAG+TCCGCATA  
CGCAGGTCCACGGCCGGGTGCTCCAGCGCTGGCGTGTTGTAGTCAAATGTTGGTAGTCAGGGTAGTT  
TTCTCCCCTGCTCCACCTGGCCACGAGTCAAACTAGCCTCTTCTTCATATCTCTCCGCCACCACT  
+  
FFFFFFFFFFFFFFFFFFFFFFFFFFFFFFFFFFFFFFFFFFFFFFFFFFFFF:FFFFFFFFFFFFFFFFFFFFFFFFFFFFFFF  
FFFFFFFFFFFFFFFFFFFFFFFFFFFFFFFFFFFFFFFFFFFFFFFFFFFFF:FFFFFFFFFFFFFFFFFFFFFFF  
@A00155:342:HHGFNDSXY:1:2139:18059:1767 1:N:0:GAACCTAG+TCCGCATA  
CGCAGGTCCACGGCCGGGTGCTCCAGCGCTGGCGTGTTGTAGTCAAATGTTGGTAGTCAGGGTAGTT  
TTCTCCCCTGCTCCACCTGGCCACGAGTCAAACTAGCCTCTTCTTCATATCTCTCCGCCACCACT  
+  
FFFFFFFFFFFFFFFFFFFFFFFFFFFFFFFFFFFFFFFFFFFFFFFFFFFFF:FF,FFFFFFFFFFFFFFFFFFFFFFFFFFFFF:FFF  
FFFFFFFFFFFFFFFFFFFFFFFFFFFFFFFFFFFFFFFFFFFFFFFFFFFFF:FFFFFFFFFFFFFFFFFFFFFFF  
@A00155:342:HHGFNDSXY:1:2677:7563:19319 1:N:0:GAACCTAG+TCCGCATA  
GCAGGTCCACGGCCGGGTGCTCCAGCGCTGGCGTGTTGTAGTCAAATGTTGGTAGTCAGGGTAGTTT  
TCCTCCCCTGCTCCACCTGGCCACGAGTCAAACTAGCCTCTTCTTCATATCTCTCCGGCCACCACTG  
+  
FFFFFFFFFFFFFFFFFFFFFFFFFFFFFFFFFFFFFFFFFFFFFFFFFFFFF:FFFFFFFFFFFFFFFFFFFFFFFFFFFFFFF  
FFFFFFFFFFFFFFFFFFFFFFFFFFFFFFFFFFFFFFFFFFFFFFFFFFFFF:FFFFFFFFFFFFFFFFFFF  
@A00155:342:HHGFNDSXY:1:1213:12165:12132 2:N:0:GAACCTAG+TCCGCATA  
GCAGGTCCACGGCCGGGTGCTCCAGCGCTGGCGTGTTGTAGTCAAATGTTGGTAGTCAGGGTAGTTT  
TCCTCCCCTGCTCCACCTGGCCACGAGTCAAACTAGCCTCTTCTTCATATCTCTCCGGCCACCACTG  
+

@A00155:342:HHGFNDSXY:1:1526:29378:15327 2:N:0:GAACCTAG+TCCGCATA  
CAGGTCCACGGCCGGGTGCTCCAGCGCTGGCGTGGTTGTAGTCAAATGTTGGTAGTCAGGGTAGTTTT  
CCTCCCCTGCTCCACCTGGCCACGAGTCAAACTAGCCTCTTCTTCATATCTCTCCGGCCACCACTGG  
+  
FFFFFFFFFFFFFFFFFFFFFFFFFFFFFFFFFFFFFFFF,F,FFFFFFFFFFFFFFFFFFFFFFFFFFFFFFFF  
FFFFFFFFFFFFFFFFFFFFFFFFFFFFFFFFFFFFFFFFFFFFFFFFFFFFFFFFFFFFFFFFFFFFFFFF:FFFFFFFFFFFF,FF:FFF:FF  
@A00155:342:HHGFNDSXY:1:2667:11568:34773 1:N:0:GAACCTAG+TCCGCATA  
CAGGTCCACGGCCGGGTGCTCCAGCGCTGGCGTGGTTGTAGTCAAATGTTGGTAGTCAGGGTAGTTTT  
CCTCCCCTGCTCCACCTGGCCACGAGTCAAACTAGCCTCTTCTTCATATCTCTCCGGCCACCACTGG  
+  
FFFFFFFFFFFFFFFFFFFFFFFFFFFFFFFFFFFFFFFF:FFFFFFFFFFFFFFFFFFFFFFFFFFFFFFFF:FFFFF  
FFFFFFFFFFFFFFFFFFFFFFFFFFFFFFFFFFFFFFFFFFFFFFFFFFFFFFFFFFFFFFFFFFFFFFFF:FFFFFFFFFFFFFFFFFFFF  
@A00155:342:HHGFNDSXY:1:2306:6587:28902 2:N:0:GAACCTAG+TCCGCATA  
AGGTCCACGGCCGGGTGCTCCAGCGCTGGCGTGGTTGTAGTCAAATGTTGGTAGTCAGGGTAGTTTTCT  
CTCCCCTGCTCCACCTGGCCACGAGTCAAACTAGCCTCTTCTTCATATCTCTCCGGCCACCACTGGT  
+  
FFFFFFFFFFFFFFFFFFFFFFFFFFFFFFFFFFFFFFFF:FFFFFF:FFFFFFFFFFFFFFFFFFFFFFFFFFFFFFFF  
FFFFFFFFFFFFFFFFFFFFFFFFFFFFFFFFFFFFFFFFFFFFFFFFFFFFFFFFFFFFFFFFFFFFFFFFFFFFFFFF  
@A00155:342:HHGFNDSXY:1:1314:18584:6089 2:N:0:GAACCTAG+TCCGCATA  
AGGTCCACGGCCGGGTGCTCCAGCGCTGGCGTGGTTGTAGTCAAATGTTGGTAGTCAGGGTAGTTTTCT  
CTCCCCTGCTCCACCTGGCCACGAGTCAAACTAGCCTCTTCTTCATATCTCTCCGGCCACCACTGGT  
+  
FFFFFF:FFFFFFFFFFFFFFFFFFFFFFFFFFFFFFFFFFFFFFFF,FFFFFFFFFFFFFFFFFFFFFFFF:FFFF:FFFFFFF  
FFFFFFFFFFFFFFFFFFFFFFFFFFFFFFFFFFFFFFFFFFFFFFFFFFFFFFFFFFFFFFFFFFFFFFFF:FFFFFFFFFFFFFFFFFFFFFFFF  
@A00155:342:HHGFNDSXY:1:1140:23303:15608 2:N:0:GAACCTAG+TCCGCATA  
GGTCCACGGCCGGGTGCTCCAGCGCTGGCGTGGTTGTAGTCAAATGTTGGTAGTCAGGGTAGTTTTCC  
TCCCCTGCTCCACCTGGCCACGAGTCAAACTAGCCTCTTCTTCATATCTCTCCGGCCACCACTGGTC  
+  
FFFFFFFFFFFFFFFFFFFFFFFFFFFFFFFFFFFFFFFFFFFFFFFFFFFFFFFFFFFFFFFFFFFFFFFFFFFFFFFF  
FFFFF:FFFFFFFFFFFFFFFFFFFFFFFFFFFFFFFFFFFFFFFFFFFFFFFFFFFFFFFFFFFFFFFFFFFFFFFF  
@A00155:342:HHGFNDSXY:1:1162:25545:19147 2:N:0:GAACCTAG+TCCGCATA  
GGTCCACGGCCGGGTGCTCCAGCGCTGGCGTGGTTGTAGTCAAATGTTGGTAGTCAGGGTAGTTTTCC  
TCCCCTGCTCCACCTGGCCACGAGTCAAACTAGCCTCTTCTTCATATCTCTCCGGCCACCACTGGTC  
+  
FFFFFFFFFFFFFFFFFFFFFFFFFFFFFFFFFFFFFFFFFFFFFFFFFFFFFFFFFFFFFFFFFFFFFFFFFFFFFFFF  
FFFFFFFFFFFFFFFFFFFFFFFFFFFFFFFFFFFFFFFF:FFFFFFFFFFFFFFFFFFFFFFFFFFFFFFFFFFFFFFFF  
@A00155:342:HHGFNDSXY:1:1414:6777:6590 2:N:0:GAACCTAG+TCCGCATA  
GGTCCACGGCCGGGTGCTCCAGCGCTGGCGTGGTTGTAGTCAAATGTTGGTAGTCAGGGTAGTTTTCC  
TCCCCTGCTCCACCTGGCCACGAGTCAAACTAGCCTCTTCTTCATATCTCTCCGGCCACCACTGGTC  
+  
FF,FF:FFFFFFFFFFFFFFFFFFFFFFFFFFFFFFFFFFFFFFFF:FFFFFFFFFFFF:FFF:FFFFFFFFFFFFF  
FFFFFFFFFFFFFFFFFFFFFFFFFFFFFFFF:FFFFFFFFFFFFFFFFFFFFFFFF:FFFFFFFFFFFFFFFFFFFFFFFF:FFFFFFF  
@A00155:342:HHGFNDSXY:1:2127:5647:2597 2:N:0:GAACCTAG+TCCGCATA  
GGTCCACGGCCGGGTGCTCCAGCGCTGGCGTGGTTGTAGTCAAATGTTGGTAGTCAGGGTAGTTTTCC  
TCCCCTGCTCCACCTGGCCACGAGTCAAACTAGCCTCTTCTTCATATCTCTCCGGCCACCACTGGTC  
+  
FFFFFFFFFFFFFFFFFFFFFFFFFFFFFFFFFFFFFFFF:F:F:FF:FFFFFF:FFFFFFFFFFFFFFFFFFFFFFFF  
FFFFFFFFFF:FFFFFF:FFFFFF:FFFFFFFFFFFFFFFFFFFFFFFFFFFFFFFFFFFFFFFFFFFFFFFF,  
@A00155:342:HHGFNDSXY:1:1537:28203:21277 2:N:0:GAACCTAG+TCCGCATA  
GTCCACGGCCGGGTGCTCCAGCGCTGGCGTGGTTGTAGTCAAATGTTGGTAGTCAGGGTAGTTTTCT  
CCCCTGCTCCACCTGGCCACGAGTCAAACTAGCCTCTTCTTCATATCTCTCCGGCCACCACTGGTC  
+  
FF,:F:FFF,:FFF:F::F,FFFFFF,,FF,FFFF:FFFF:FFFF:FFF:FFF:FF::FFFF,FFFF  
:F:FFFF:FFF:FF:FFF:F,FFFFFFFFFFFFFFFF:FFFF:FF,FFFFFF:FFF,,FF::FFF:

[illegible]



[illegible]

```
@A00155:342:HHGFNDSXY:1:1169:5791:31751 2:N:0:GAACCTAG+TCCGCATA
CACGGCCGGGTGCTCCAGCGCTGGCGTGTTGTAGTCAAATGTTGGTAGTCAGGGTAGTTTTCTCCTCCC
CTGCTCCACCTGGCCACGAGTCAAACTAGCCTCTTCTTCATATCTCTCCGGCCACCACTGGTC
+
F:FFF:FFFFFFFFFFFFFFFFFFFFFFFFFFFFFFFFFFFFFFFFFFFFFFFFFFFFFFFFFFFFFFFFFFFF
FFFFFF:FFFFFFFFFFFFFFFFFFFFFFFFFFFFFFFFFFFFFFFFFFFFFFFFFFFFFFFFFFFFFFFFFFFF
@A00155:342:HHGFNDSXY:1:2153:14950:5682 1:N:0:GAACCTAG+TCCGCATA
ACGGCCGGGTGCTCCAGCGCTGGCGTGTTGTAGTCAAATGTTGGTAGTCAGGGTAGTTTTCTCCTCCCC
TGCTCCACCTGGCCACGAGTCAAACTAGCCTCTTCTTCATATCTCTCCGGCCACCACTGGTCCATAT
+
,FFFFFFFFFFFFFFFFFFFFFFFFFFFFFFFFFFFFFFFFFFFFFFFFFFFFFFFFFFFFFFFFFFFFFFFFFFFF
FFFFFFFFFFFFFFFFFFFFFFFFFFFFFFFFFFFFFFFFFFFFFFFFFFFFFFFFFFFFFFFFFFFFFFFFFFFF
@A00155:342:HHGFNDSXY:1:2672:31665:27649 1:N:0:GAACCTAG+TCCGCATA
ACGGCCGGGTGCTCCAGCGCTGGCGTGTTGTAGTCAAATGTTGGTAGTCAGGGTAGTTTTCTCCTCCCC
TGCTCCACCTGGCCACGAGTCAAACTAGCCTCTTCTTCATATCTCTCCGGCCACCACTGGTCCATAT
+
FFFFFFFFFFFFFFFFFFFFFFFFFFFFFFFFFFFFFFFFFFFFFFFFFFFFFFFFFFFFFFFFFFFFFFFFFFFF,FFFFFFFFFFFFF
FFFFFFFFFFFFFFFFFFFFFFFFFFFFFFFFFFFFFFFFFFFFFFFFFFFFFFFFFFFFFFFFFFFFFFFFFFFF
@A00155:342:HHGFNDSXY:1:1313:5791:12962 1:N:0:GAACCTAG+TCCGCATA
ACGGCCGGGTGCTCCAGCGCTGGCGTGTTGTAGTCAAATGTTGGTAGTCAGGGTAGTTTTCTCCTCCCC
TGCTCCACCTGGCCACGAGTCAAACTAGCCTCTTCTTCATATCTCTCCGGCCACCACTGGTCCATAT
+
FFFFFFFFFFFFFFFFFFFFFFFFFFFFF::FFFFFFFF:FFFFFFF::FFFFFFFFFFFFFFFFFFFFFFFFFFFFF
FFFFFFFFFFFFFFFFFFFFFFFFFFFFFFFFFFFFFFFFFFFFFFFFFFFFFFFFFFFFFFFFFFFFF:FFFFFFFFFFFFF:FFFFFFFFFFFFF
@A00155:342:HHGFNDSXY:1:1677:30960:4852 1:N:0:GAACCTAG+TCCGCATA
ACGGCCGGGTGCTCCAGCGCTGGCGTGTTGTAGTCAAATGTTGGTAGTCAGGGTAGTTTTCTCCTCCCC
TGCTCCACCTGGCCACGAGTCAAACTAGCCTCTTCTTCATATCTCTCCGGCCACCACTGGTCCATAT
+
FFFFFFFFFFFFFFFFFFFFFFFFFFFFFFFFFFFFFFFFFFFFFFFFFFFFFFFFFFFFFFFFFFFFFFFFFFFFF
FFFFFFFFFFFFFFFFFFFFFFFFFFFFFFFFFFFFFFFFFFFFFFFFFFFFFFFFFFFFFFFFFFFFF:FFFFFFFFFFFFFFFFFFFFFFFFFFFFF
@A00155:342:HHGFNDSXY:1:2544:12048:24298 1:N:0:GAACCTAG+TCCGCATA
CGGCCGGGTGCTCCAGCGCTGGCGTGTTGTAGTCAAATGTTGGTAGTCAGGGTAGTTTTCTCCTCCCT
GCTCCACCTGGCCACGAGTCAAACTAGCCTCTTCTTCATATCTCTCCGGCCACCACTGGTCCATATC
+
FFFFFFFFFFFFFFFFFFFFFFFFFFFFFFFFFFFFFFFFFFFFFFFFFFFFFFFFFFFFFFFFFFFFFFFFFFFFF
FFFFFFFFFFFFFFFFFFFFFFFFFFFFFFFFFFFFFFFFFFFFFFFFFFFFFFFFFFFFFFFFFFFFF:FFFFFFFFFFFFFFFFFFFFFFFFFFFFF
@A00155:342:HHGFNDSXY:1:1525:3269:12821 2:N:0:GAACCTAG+TCCGCATA
CGGCCGGGTGCTCCAGCGCTGGCGTGTTGTAGTCAAATGTTGGTAGTCAGGGTAGTTTTCTCCTCCCT
GCTCCACCTGGCCACGAGTCAAACTAGCCTCTTCTTCATATCTCTCCGGCCACCACTGGTCCATATC
+
FFFFFFFFFFFFFFFFFFFFFFFFFFFFFFFFFFFFFFFFFFFFFFFFFFFFFFFFFFFFFFFFFFFFFFFFFFFFF
FFFFFFFFFFFFFFFFFFFFFFFFFFFFFFFFFFFFFFFFFFFFFFFFFFFFFFFFFFFFFFFFFFFFF:FFFFFFFFFFFFF:
@A00155:342:HHGFNDSXY:1:2269:16731:28870 1:N:0:GAACCTAG+TCCGCATA
CGGCCGGGTGCTCCAGCGCTGGCGTGTTGTAGTCAAATGTTGGTAGTCAGGGTAGTTTTCTCCTCCCT
GCTCCACCTGGCCACGAGTCAAACTAGCCTCTTCTTCATATCTCTCCGGCCACCACTGGTCCATATC
+
FFFFFFFFFFFFFFFFFFFFFFFFFFFFFFFFFFFFFFFFFFFFFFFFFFFFFFFFFFFFFFFFFFFFFFFFFFFFF
FFFFFFFFFFFFFFFFFFFFFFFFFFFFFFFFFFFFFFFFFFFFFFFFFFFFFFFFFFFFFFFFFFFFF:FFFFFFFFFFFFF:
@A00155:342:HHGFNDSXY:1:1144:6307:10316 2:N:0:GAACCTAG+TCCGCATA
CGGCCGGGTGCTCCAGCGCTGGCGTGTTGTAGTCAAATGTTGGTAGTCAGGGTAGTTTTCTCCTCCCT
GCTCCACCTGGCCACGAGTCAAACTAGCCTCTTCTTCATATCTCTCCGGCCACCACTGGTCCATATC
+
FFFFFFFFFFFFFFFFFFFFF:FFFFFFFFFFFFFFFFFFFFF:FFFFFFFFFFFFF:FFFFFFF::FFFFFFFFFFFFF:F
FFFFFFFFFFFFFFFFFFFFFFFFFFFFF:FFFFFFFFFFFFFFFFFFFFFFFFFFFFFFFFFFFFFFFFFFFFF
```

@A00155:342:HHGFNDSXY:1:2557:12454:10911 2:N:0:GAACCTAG+TCCGCATA  
CGGCCGGGTGCTCCAGCGCTGGCGTGTTGTAGTCAAATGTTGGTAGTCAGGGTAGTTTTCTCCCCT  
GCTCCACCTGGCCACGAGTCAAACTAGCCTCTTCTTCATATCTCTCCGGCCACCACTGGTCCATATC  
+  
FFFFFFFFFFFFFFFFFFFFFFFFFFFFFFFFFFFFFFFFFFFFFFFFFFFFF:FFFFFFFFFFFFFFF:FFFFFFFFFFFFFFF::FFFFFFFFFFFF  
FFFFFFFFFFFFFFFFFFFFFFFFFFFFFFFFFFFFFFFFFFFFFFFFFFFFF:FFF:FFF:FFFFFFFFFFFFFFFFFFFFFFFFFFFFF  
@A00155:342:HHGFNDSXY:1:2557:12355:10113 2:N:0:GAACCTAG+TCCGCATA  
CGGCCGGGTGCTCCAGCGCTGGCGTGTTGTAGTCAAATGTTGGTAGTCAGGGTAGTTTTCTCCCCT  
GCTCCACCTGGCCACGAGTCAAACTAGCCTCTTCTTCATATCTCTCCGGCCACCACTGGTCCATATC  
+  
FFFFFFFFFFFFFFFFFFFFFFFFFFFFFFFFFFFFFFFFFFFFFFFFFFFFF:FFFFFFFFFFFFFFF:FFFFFFFFFFFFFFF:FFFFFFFFFFFFFFF  
FFFFFFFFFFFFFFFFFFFFFFFFFFFFFFFFFFFFFFFFFFFFFFFFFFFFF:FFFFFFFFFFFFFFFFFFFFFFFFFFFFFFFFFFFFFFFFFFFFF:FF  
@A00155:342:HHGFNDSXY:1:1567:26404:9298 1:N:0:GAACCTAG+TCCGCATA  
CGGCCGGGTGCTCCAGCGCTGGCGTGTTGTAGTCAAATGTTGGTAGTCAGGGTAGTTTTCTCCCCT  
GCTCCACCTGGCCACGAGTCAAACTAGCCTCTTCTTCATATCTCTCCGGCCACCACTGGTCCATATC  
+  
FFFFFFFFFFFFFFFFFFFFFFFFFFFFFFFFFFFFFFFFFFFFFFFFFFFFF:FFFFFFFFFFFFFFF:FFFFFFFFFFFFFFF:FFFFFFFFFFFFFFF  
FFFFFFFFFFFFFFFFFFFFFFFFFFFFFFFFFFFFFFFFFFFFFFFFFFFFF:FFFFFFFFFFFFFFFFFFFFFFFFFFFFFFFFFFFFFFFFFFFFF:FF  
@A00155:342:HHGFNDSXY:1:2456:4101:16548 2:N:0:GAACCTAG+TCCGCATA  
GGCCGGGTGCTCCAGCGCTGGCGTGTTGTAGTCAAATGTTGGTAGTCAGGGTAGTTTTCTCCCCTG  
CTCCACCTGGCCACGAGTCAAACTAGCCTCTTCTTCATATCTCTCCGGCCACCACTGGTCCATATCG  
+  
:FFFFFFFFFFFFFFFFFFFFFFFFFFFFFFFFFFFFFFFFFFFFFFFFFFFFF:FFFFFFFFFFFFFFF:FF:FFFFFFFFFFFFFFFFFFFFFFFFFFFFF  
F:FFFFF,FFFFFFFFFFFFFFFFF:FFFFFFFFFFFFFFFFFFFFFFFFFFFFFFFFFFFFFFFFFFFFFFFFFFFFF:FFFFFFFFFFFFFFFFFFFFF  
@A00155:342:HHGFNDSXY:1:2607:22932:19789 1:N:0:GAACCTAG+TCCGCATA  
GGCCGGGTGCTCCAGCGCTGGCGTGTTGTAGTCAAATGTTGGTAGTCAGGGTAGTTTTCTCCCCTG  
TCCACCTGGCCACGAGTCAAACTAGCCTCTTCTTCATATCTCTCCGGCCACCACTGGTCCATATCG  
+  
FFFFFFFFFFFFFFFFFFFFFFFFFFFFFFFFFFFFFFFFFFFFFFFFFFFFF:FFFFFFFFFFFFFFF:FFFFFFFFFFFFFFF:FFFFFFFFFFFFFFF  
FFFFFFFFFFFFFFFFFFFFFFFFFFFFFFFFFFFFFFFFFFFFFFFFFFFFF:FFFFFFFFFFFFFFF:FFFFFFFFFFFFFFF:FFFFF  
@A00155:342:HHGFNDSXY:1:1526:29378:15327 1:N:0:GAACCTAG+TCCGCATA  
GCCGGGTGCTCCAGCGCTGGCGTGTTGTAGTCAAATGTTGGTAGTCAGGGTAGTTTTCTCCCCTGC  
TCCACCTGGCCACGAGTCAAACTAGCCTCTTCTTCATATCTCTCCGGCCACCACTGGTCCATATCGA  
+  
FFFFFFFFFFFFFFFFFFFFFFFFFFFFFFFFFFFFFFFFFFFFFFFFFFFFF:FFFFFFFFFFFFFFF:FFFFFFFFFFFFFFF:FFFFFFFFFFFFFFF  
FFFFFFFFFFFFFFFFFFFFFFFFFFFFFFFFFFFFFFFFFFFFFFFFFFFFF,FFFFFFFFFFFFFFF:F,FFFFF  
@A00155:342:HHGFNDSXY:1:1161:14244:26381 1:N:0:GAACCTAG+TCCGCATA  
GCCGGGTGCTCCAGCGCTGGCGTGTTGTAGTCAAATGTTGGTAGTCAGGGTAGTTTTCTCCCCTGC  
TCCACCTGGCCACGAGTCAAACTAGCCTCTTCTTCATATCTCTCCGGCCACCACTGGTCCATATCGA  
+  
FFFFFFFFFFFFFFFFFFFFFFFFFFFFFFFFFFFFFFFFFFFFFFFFFFFFF:FFFFFFFFFFFFFFF:FF,FFFFFFFFFFFFFFFFFFFFFFFFFFFFF  
FFFFFFFFFFFFFFFFF:FFFFFFFFFFFFFFF:FFFF:FFFFFFF:FFFFFFFFFFFFFFFFF:F,FFFFFFFF:FFFF  
@A00155:342:HHGFNDSXY:1:1475:13141:31454 1:N:0:GAACCTAG+TCCGCATA  
GCCGGGTGCTCCAGCGCTGGCGTGTTGTAGTCAAATGTTGGTAGTCAGGGTAGTTTTCTCCCCTGC  
TCCACCTGGCCACGAGTCAAACTAGCCTCTTCTTCATATCTCTCCGGCCACCACTGGTCCATATCGA  
+  
FFFFFFFFFFFFFFFFFFFFFFFFFFFFFFFFFFFFFFFFFFFFFFFFFFFFF:FFFFFFFFFFFFFFF:FFFFFFFFFFFFFFF:FFFFFFFFFFFFFFF  
FFFFFFFFFFFFFFFFFFFFFFFFFFFFFFFFFFFFFFFFFFFFFFFFFFFFF:FFFFFFFFFFFFFFF:FFFFFFFFFFFFFFF:FFFFF  
@A00155:342:HHGFNDSXY:1:2575:17535:23657 1:N:0:GAACCTAG+TCCGCATA  
GCCGGGTGCTCCAGCGCTGGCGTGTTGTAGTCAAATGTTGGTAGTCAGGGTAGTTTTCTCCCCTGC  
TCCACCTGGCCACGAGTCAAACTAGCCTCTTCTTCATATCTCTCCGGCCACCACTGGTCCATATCGA  
+  
FFFF:FFFFFFFFFFFF,FFFFFFF,FFF:F:FFFF:FFFF,F,FFFFFFFF,F:FFFF:FFFFFF:F,  
FFFFFFFFFFFFFFF,F:FFFFFFFFF:FFF,,FFFFFFFFFFFFFFFFF:FFFFFFFFFFFFFFFFFFFF,FFF

[illegible]

```
@A00155:342:HHGFNDSXY:1:1508:19099:23578 2:N:0:GAACCTAG+TCCGCATA
CGGGTGCTCCAGCGCTGGCGTGGTTGTAGTCAAATGTTGGTAGTCAGGGTAGTTTTCTCCCCTGCTC
CACCTGGCCACGAGTCAAAACTAGCCTCTTCTTCATATCTCTCCGCCACCCTGGTCCATATCGATA
+
FFFFFFFFFFFFFFF:FFFFFFFFFFFFFFF:FFFFFFFFFFFFFFF:FFFFFFFF:FFFF
FFFFFFFFFF:FFFFFFFF:FFFFFFFFFFFFFFF::FFFFFFFFFFFFFFFFFFFFFFFFFFFF,FF
@A00155:342:HHGFNDSXY:1:1260:24876:23030 1:N:0:GAACCTAG+TCCGCATA
CGGGTGCTCCAGCGCTGGCGTGGTTGTAGTCAAATGTTGGTAGTCAGGGTAGTTTTCTCCCCTGCTC
CACCTGGCCACGAGTCAAAACTAGCCTCTTCTTCATATCTCTCCGCCACCCTGGTCCATATCGATA
+
FFFFFFFFFFFFFFFFFFFFFFFFFFFFFFFFFFFFFFFFFFFFFFFFFFFFFFFFFFFFFFFFFFFF
FFFFFFFFFFFFFFFFFFFFFFFFFFFFFFFFFFFFFFFFFFFFFFFFFFFFFFFFFFFFFFFFFFFF:FFFFFFFFFFFFFFFFFFFFFFFFFFFF
@A00155:342:HHGFNDSXY:1:2608:26992:13823 1:N:0:GAACCTAG+TCCGCATA
CGGGTGCTCCAGCGCTGGCGTGGTTGTAGTCAAATGTTGGTAGTCAGGGTAGTTTTCTCCCCTGCTC
TACCTGGCCACGAGTCAAAACTAGCCTCTTCTTCATATCTCTCCGCCACCCTGGTCCATATCGATA
+
FFFFF:FFFF:F:FFFFF,FF,FFFFF:FFFFFFFFFFFFFFFFFFFFFFFFFFFF:F,:FFF,FFFF
,FFFFFFFFFFFFFFFFFFFFF::FFFF:FFFF:FFF:F:F:FFFF:FFFF,FF:FF:,FFF,:FF
@A00155:342:HHGFNDSXY:1:1363:3830:6621 1:N:0:GAACCTAG+TCCGCATA
CGGGTGCTCCAGCGCTGGCGTGGTTGTAGTCAAATGTTGGTAGTCAGGGTAGTTTTCTCCCCTGCTC
CACCTGGCCACGAGTCAAAACTAGCCTCTTCTTCATATCTCTCCGCCACCCTGGTCCATATCGATA
+
FFFFFFFFFFFFFFFFFFFFFFF,FFFFFFFFFFFFFFFFFFFFFFFFFFFFFFFFFFFFFFFFFFFFF
FFFFFFFFFFFFFFFFFFFFFFFFFFFF:FFFFFFFFFFFFFFF:FF:FFFF:FFFFFFFF:FFFFFFFFFFFFFFF
@A00155:342:HHGFNDSXY:1:1337:30110:32158 1:N:0:GAACCTAG+TCCGCATA
GGGTGCTCCAGCGCTGGCGTGGTTGTAGTCAAATGTTGGTAGTCAGGGTAGTTTTCTCCCCTGCTCC
ACCTGGCCACGAGTCAAAACTAGCCTCTTCTTCATATCTCTCCGCCACCCTGGTCCATATCGATAC
+
FFFFFFFFFFFFFFFFFFFFFFFFFFFFFFFFFFFFFFFFFFFFFFFFFFFFFFFFFFFFFFFFFFFF
FFFFFFFFFFFFFFFFFFFFFFFFFFFF:FFFFFFFFFFFFFFFFFFFFFFFFFFFFFFFFFFFFFFFFFFFF
@A00155:342:HHGFNDSXY:1:1656:26494:3662 2:N:0:GAACCTAG+TCCGCATA
GTGCTCCAGCGCTGGCGTGGTTGTAGTCAAATGTTGGTAGTCAGGGTAGTTTTCTCCCCTGCTCCAC
CTGGCCACGAGTCAAAACTAGCCTCTTCTTCATATCTCTCCGCCACCCTGGTCCATATCGATACTC
+
FF,FFFFFFFFFFFFFFFFFFFFFFFFFFFFFFFFFFFF:FFFFF:F:F:FFFFFFFFFFFFFFFF:FFF:FFFFFF
FFFFFFFFFFFFFFFF:FFFFFFFFFFFFFFFF:FFFFFFFF:FFFFFFFFFFFFFFFFFFFFFFFFFFFFF
@A00155:342:HHGFNDSXY:1:2321:30978:33755 2:N:0:GAACCTAG+TCCGCATA
GTGCTCCAGCGCTGGCGTGGTTGTAGTCAAATGTTGGTAGTCAGGGTAGTTTTCTCCCCTGCTCCAC
CTGGCCACGAGTCAAAACTAGCCTCTTCTTCATATCTCTCCGCCACCCTGGTCCATATCGATACTC
+
FFFFFFF,FFFFFFFFF:FFFFFFFFFFFF,FFFFFFFFFFFFFFFFFFFFFFFFFFFFFFFFFFFF:FFF
:FFFFFFFFFFFFFFFFFFFFFFFFFFFFFFFFFFFFFFFFFFFFFFFFFFFFFFFFFFFFFFFFFFFF::FFF
@A00155:342:HHGFNDSXY:1:2371:19958:26600 2:N:0:GAACCTAG+TCCGCATA
GTGCTCCAGCGCTGGCGTGGTTGTAGTCAAATGTTGGTAGTCAGGGTAGTTTTCTCCCCTGCTCCAC
CTGGCCACGAGTCAAAACTAGCCTCTTCTTCATATCTCTCCGCCACCCTGGTCCATATCGATACTC
+
FFFFFFFFFFFFFFFFFFFFFFFFFFFFFFFFFFFFFFFFFFFFFFFFFFFFFFFFFFFFFFFFFFFF:FFFFFFFFFFFFFFFFFFFFFFFF
FFFFFFFFFFFFFFFFFFFFFFFFFFFFFFFFFFFFFFFFFFFFFFFFFFFFFFFFFFFFFFFFFFFF
@A00155:342:HHGFNDSXY:1:1352:15908:25254 2:N:0:GAACCTAG+TCCGCATA
GTGCTCCAGCGCTGGCGTGGTTGTAGTCAAATGTTGGTAGTCAGGGTAGTTTTCTCCCCTGCTCCAC
CTGGCCACGAGTCAAAACTAGCCTCTTCTTCATATCTCTCCGCCACCCTGGTCCATATCGATACTC
+
```

@A00155:342:HHGFNDSXY:1:2465:12861:24925 2:N:0:GAACCTAG+TCCGCATA  
 GTGCTCCAGCGCTGGCGTGGTTGTAGTCAAATGTTGGTAGTCAGGGTAGTTTTCTCCCTGCTCCAC  
 CTGGCCACGAGTCAAACTAGCCTCTTCTTCATATCTCTCCGGCCACCACTGGTCCATATCGATACTC  
 +  
 FF:FFF:FFFFFFFFFFFFFFF::F:FFFFFFFFFFFFFFF:FFFFFFFFFFFFFFFFFFFFFFFFFFFFFFF  
 FFFFFFFFFFFFFFFFFFFFFFFFFFFFFFFFFF:FFFFFFFFFFFFFFFFFFFFFFFFFFFFFFF:FFFFFFFFFFFF  
 @A00155:342:HHGFNDSXY:1:2432:25102:25958 2:N:0:GAACCTAG+TCCGCATA  
 GTGCTCCAGCGCTGGCGTGGTTGTAGTCAAATGTTGGTAGTCAGGGTAGTTTTCTCCCTGCTCCAC  
 CTGGCCACGAGTCAAACTAGCCTCTTCTTCATATCTCTCCGGCCACCACTGGTCCATATCGATACTC  
 +  
 FFFFFFFFFFFFFFFFFFFFFFFF:FFFFFFFFFFFFFFFFFFFFFFFFFFFFFFFFFFFF,FFFFFFFFFFFFFFFFFFFF  
 FFFFFFFFFFFFFFFFFFFFFFFFFFFFFFFFFF:FFFFFFFFFFFFFFFFFFFFFFFFFFFFFFFFFFFFFFFFFFFFF  
 @A00155:342:HHGFNDSXY:1:1234:13783:14278 2:N:0:GAACCTAG+TCCGCATA  
 GTGCTCCAGCGCTGGCGTGGTTGTAGTCAAATGTTGGTAGTCAGGGTAGTTTTCTCCCTGCTCCAC  
 CTGGCCACGAGTCAAACTAGCCTCTTCTTCATATCTCTCCGGCCACCACTGGTCCATATCGATACTC  
 +  
 FFFFFFFFFFFFFFFFFFFFFFFF::FFFFFFFF:FFF,FFFFFFFFFFFFFFFFFFFFFFFFFFFFFFFFFFFF:FFFFFFFFFFFFF  
 FFFFFFFFFFFFFFFFFFFFFFFF::FFFFF,FFFFFFFFFFFFFFF:FFFFFFFFFFFFFFFFFFFFFFFFFFFFFFFFFFFF  
 @A00155:342:HHGFNDSXY:1:1570:12707:25629 2:N:0:GAACCTAG+TCCGCATA  
 GTGCTCCAGCGCTGGCGTGGTTGTAGTCAAATGTTGGTAGTCAGGGTAGTTTTCTCCCTGCTCCAC  
 CTGGCCACGAGTCAAACTAGCCTCTTCTTCATATCTCTCCGGCCACCACTGGTCCATATCGATACTC  
 +  
 FFFFFFFFFFFFFFFFFFFFFFFFFFFFFFFFFF:FFFFFFFFFFFFFFFFFFFFF:FFFFFFFFFFFFF  
 FFFFFFFFFFFFFFFFFFFFFFFF:FF:FFFFFFFFFFFFFFFFFFFFFFFFFFFFFFFFFFFFFFFFFFFFF  
 @A00155:342:HHGFNDSXY:1:1511:23005:13495 2:N:0:GAACCTAG+TCCGCATA  
 GTGCTCCAGCGCTGGCGTGGTTGTAGTCAAATGTTGGTAGTCAGGGTAGTTTTCTCCCTGCTCCAC  
 CTGGCCACGAGTCAAACTAGCCTCTTCTTCATATCTCTCCGGCCACCACTGGTCCATATCGATACTC  
 +  
 FFFFFFFFFFFFFFFF:FFFFFFFFFFFF:FFFFFFFFFFFFFFFFFFFFFFFFFFFFFFFFFFFFFFFFFFFFF  
 FFFFFFFFFFFFFFFFFFFFFFFF:FFFFFFFFFFFFFFFFFFFFFFFFFFFFFFFFFFFFFFFFFFFF::FFF:FFFF:FFFFFFFFFFFFF  
 @A00155:342:HHGFNDSXY:1:2328:32208:36448 2:N:0:GAACCTAG+TCCGCATA  
 GTGCTCCAGCGCTGGCGTGGTTGTAGTCAAATGTTGGTAGTCAGGGTAGTTTTCTCCCTGCTCCAC  
 CTGGCCACGAGTCAAACTAGCCTCTTCTTCATATCTCTCCGGCCACCACTGGTCCATATCGATACTC  
 +  
 FFFFFFFFFFFFFFFFFFFFFFFFFFFFFFFF:FFFFFFFFFFFF,FFFFFFFFFFFFFFF:FFFFFFFFFFFFFFFFFFFFFFFFFFFFF  
 FFFFFFFFFFFFFFFFFFFFFFFFFFFFFFFFFF:FFFFFFFFFFFFFFFFFFFFFFFFFFFFFFFFFFFFFFFFFFFFF  
 @A00155:342:HHGFNDSXY:1:1117:31006:8281 2:N:0:GAACCTAG+TCCGCATA  
 GTGCTCCAGCGCTGGCGTGGTTGTAGTCAAATGTTGGTAGTCAGGGTAGTTTTCTCCCTGCTCCAC  
 CTGGCCACGAGTCAAACTAGCCTCTTCTTCATATCTCTCCGGCCACCACTGGTCCATATCGATACTC  
 +  
 FFFFFFFFFFFFFFFFFFFFFFFFFFFFFFFFFF:FFFFFFFFFFFFFFFFFFFFFFFFFFFFFFFFFFFFFFFFFFFF:FFFFFFF  
 FFFFFFFFFFFFFFFF:FFFFFFFFFFFFFFFFFFFFFFFFFFFFFFFFFFFFFFFFFFFFFFFFFFFFFFFFFFFFF  
 @A00155:342:HHGFNDSXY:1:2426:11659:8061 1:N:0:GAACCTAG+TCCGCATA  
 CTCCAGCGCTGGCGTGGTTGTAGTCAAATGTTGGTAGTCAGGGTAGTTTTCTCCCTGCTCCACCTG  
 GCCACGAGTCAAACTAGCCTCTTCTTCATATCTCTCCGGCCACCACTGGTCCATATCGATACTCAGC  
 +  
 FFFFFFFFFFFFFFFFFFFFFFFFFFFFFFFFFF:FFFFFFFFFFFFFFFFFFFFFFFFFFFFFFFFFFFFFFFFFFFFF  
 FFFFFFFFFFFFFFFF:FFFFFFFFFFFFFFFFFFFF:FFFFFFFFFFFFFFFFFFFFFFFFFFFFFFFFFFFFF:FFFFFFFFFFFF  
 @A00155:342:HHGFNDSXY:1:2467:21748:18521 1:N:0:GAACCTAG+TCCGCATA  
 CTCCAGCGCTGGCGTGGTTGTAGTCAAATGTTGGTAGTCAGGGTAGTTTTCTCCCTGCTCCACCTG  
 GCCACGAGTCAAACTAGCCTCTTCTTCATATCTCTCCGGCCACCACTGGTCCATATCGATACTCAGC  
 +  
 FFFFFFFFFFFFFFFFFFFFFFFFFFFFFFFFFF:FFFFFFFFFFFF:FFFFFFFFFFFFFFFFFFFFFFFFFFFFFFFFFFFFF:

@A00155:342:HHGFNDSXY:1:1374:26702:8688 1:N:0:GAACCTAG+TCCGCATA  
CTCCAGCGCTGGCGTGGTTGTAGTCAAATGTTGGTAGTCAGGGTAGTTTTCTCCCTGCTCCACCTG  
GCCACGAGTCAAACTAGCCTCTTCTTCATATCTCTCCGCCACCACTGGTCCATATCGATACTCACG  
+  
FFFFFFFFFFFFFFFFFFFFFFFFFFFFFFFFFFFFFFFFFFFFFFFFFFFFFFFFFFFFFFFFFFFFFFFF  
FFFFFFFFFFFFFFFFFFFFFFFFFFFFFFFFFFFFFFFFFFFFFFFFFFFFFFFFFFFFFFFFFFFFFFFF  
@A00155:342:HHGFNDSXY:1:2573:24542:35603 1:N:0:GAACCTAG+TCCGCATA  
CTCCAGCGCTGGCGTGGTTGTAGTCAAATGTTGGTAGTCAGGGTAGTTTTCTCCCTGCTCCACCTG  
GCCACGAGTCAAACTAGCCTCTTCTTCATATCTCTCCGCCACCACTGGTCCATATCGATACTCACG  
+  
FFFFFFFFFFFFFFFFFFFFFFFFFFFFFFFFFFFFFFFFFFFFFFFFFFFFFFFFFFFFFFFFFFFFFFFF  
FFFFFFFFFFFFFFFFFFFFFFFFFFFFFFFFFFFFFFFFFFFFFFFFFFFFFFFFFFFFFFFFFFFFFFFF:  
@A00155:342:HHGFNDSXY:1:2161:12653:9502 2:N:0:GAACCTAG+TCCGCATA  
TCCAGCGCTGGCGTGGTTGTAGTCAAATGTTGGTAGTCAGGGTAGTTTTCTCCCTGCTCCACCTGG  
CCACGAGTCAAACTAGCCTCTTCTTCATATCTCTCCGCCACCACTGGTCCATATCGATACTCACGT  
+  
FFFFFFFFFFFFFFFFFFFFFFFFFFFFFFFFFFFFFFFFFFFFFFFFFFFFFFFFFFFFFFFFFFFFFFFF  
FFFFFFFFFFFFFFFFFFFFFFFFFFFFFFFFFFFFFFFFFFFFFFFFFFFFFFFFFFFFFFFFFFFFFFFF:  
@A00155:342:HHGFNDSXY:1:2161:13169:9862 2:N:0:GAACCTAG+TCCGCATA  
TCCAGCGCTGGCGTGGTTGTAGTCAAATGTTGGTAGTCAGGGTAGTTTTCTCCCTGCTCCACCTGG  
CCACGAGTCAAACTAGCCTCTTCTTCATATCTCTCCGCCACCACTGGTCCATATCGATACTCACGT  
+  
FFFFFFFFFFFFFFFFFFFFFFFFFFFFFFFFFFFFFFFFFFFFFFFFFFFFFFFFFFFFFFFFFFFFFFFF  
FFFFFFFFFFFFFFFFFFFFFFFFFFFFFFFFFFFFFFFFFFFFFFFFFFFFFFFFFFFFFFFFFFFFFFFF  
@A00155:342:HHGFNDSXY:1:1314:16731:6637 2:N:0:GAACCTAG+TCCGCATA  
TCCAGCGCTGGCGTGGTTGTAGTCAAATGTTGGTAGTCAGGGTAGTTTTCTCCCTGCTCCACCTGG  
CCACGAGTCAAACTAGCCTCTTCTTCATATCTCTCCGCCACCACTGGTCCATATCGATACTCACGT  
+  
FFFFFFFFFFFFFFFFFFFFFFFFFFFFFFFFFFFFFFFFFFFFFFFFFFFFFFFFFFFFFFFFFFFFFFFF  
FFFFFFFFFFFFFFFFFFFFFFFFFFFFFFFFFFFFFFFFFFFFFFFFFFFFFFFFFFFFFFFFFFFFFFFF  
@A00155:342:HHGFNDSXY:1:1173:32470:36839 2:N:0:GAACCTAG+TCCGCATA  
TCCAGCGCTGGCGTGGTTGTAGTCAAATGTTGGTAGTCAGGGTAGTTTTCTCCCTGCTCCACCTGG  
CCACGAGTCAAACTAGCCTCTTCTTCATATCTCTCCGCCACCACTGGTCCATATCGATACTCACGT  
+  
FFFFFFFFFFFFFFFFFFFFFFFFFFFFFFFFFFFFFFFFFFFFFFFFFFFFFFFFFFFFFFFFFFFFFFFF  
FFFFFFFFFFFFFFFFFFFFFFFFFFFFFFFFFFFFFFFFFFFFFFFFFFFFFFFFFFFFFFFFFFFFFFFF  
@A00155:342:HHGFNDSXY:1:1406:8015:24017 2:N:0:GAACCTAG+TCCGCATA  
TCCAGCGCTGGCGTGGTTGTAGTCAAATGTTGGTAGTCAGGGTAGTTTTCTCCCTGCTCCACCTGG  
CCACGAGTCAAACTAGCCTCTTCTTCATATCTCTCCGCCACCACTGGTCCATATCGATACTCACGT  
+  
FFFFFFFFFFFFFFFFFFFFFFFFFFFFFFFFFFFFFFFFFFFFFFFFFFFFFFFFFFFFFFFFFFFFFFFF  
FFFFFFFFFFFFFFFFFFFFFFFFFFFFFFFFFFFFFFFFFFFFFFFFFFFFFFFFFFFFFFFFFFFFFFFF  
@A00155:342:HHGFNDSXY:1:2658:16197:26882 1:N:0:GAACCTAG+TCCGCATA  
CAGCGCTGGCGTGGTTGTAGTCAAATGTTGGTAGTCAGGGTAGTTTTCTCCCTGCTCCACCTGGCC  
ACGAGTCAAACTAGCCTCTTCTTCATATCTCTCCGCCACCACTGGTCCATATCGATACT  
+  
FFFFFFFFFFFFFFFFFFFFFFFFFFFFFFFFFFFFFFFFFFFFFFFFFFFFFFFFFFFFFFFFFFFFFFFF  
FFFFFFFFFFFFFFFFFFFFFFFFFFFFFFFFFFFFFFFFFFFFFFFFFFFFFFFFFFFFFFFFFFFFFFFF  
@A00155:342:HHGFNDSXY:1:1169:5791:31751 1:N:0:GAACCTAG+TCCGCATA  
CAGCGCTGGCGTGGTTGTAGTCAAATGTTGGTAGTCAGGGTAGTTTTCTCCCTGCTCCACCTGGCC  
ACGAGTCAAACTAGCCTCTTCTTCATATCTCTCCGCCACCACTGGTCCATATCGATACTCAC  
+  
,FFFFFFFFFFFFFF:F:FFF,FFFFFFFF:FFFFFFFF,FF,,FFFFFFFF:FFFFFFFFFFFFFFFF  
FFFFFFFF:FFFFFFFFFFFFFFFF:FFFFFF:FFFF:FF,F,FFFFFFFFFFFFFFFFFFFFFFFF

+

@

+

@

+

@

+

@

+

@

+

©

+

©

+

Q

+



[illegible]

[illegible]

[illegible]



@A00155:342:HHGFNDSXY:1:1637:16911:11616 1:N:0:GAACCTAG+TCCGCATA  
TGTTGGTAGTCAGGGTAGTTTTCTCCCTGCTCCACCTGGCCACGAGTCAAACTAGCCTCTTCTTC  
ATATCTCTCCGGCCACCACTGGTCCATATCGATACTCACGTGTCCGTCAGAGTATGTTCCAGCTCAC  
+  
FFFFFFFFFFFFFFFFFFFFFFFFFFFFFFFFFFFFFFFFFFFFFFFFFFFFFFFFFFFFFFFFFFFFFFFF:FFFFFFFF  
FFFFFFFFFFFFFFFFFFFFFFFFFFFFFFFFFFFFFFFFFFFFFFFFFFFFFFFFFFFFFFFFFFFFFFFF:FFF:FFFF  
@A00155:342:HHGFNDSXY:1:2575:17535:23657 2:N:0:GAACCTAG+TCCGCATA  
GTTGGTAGTCAGGGTAGTTTTCTCCCTGCTCCACCTGGCCACGAGTCAAACTAGCCTCTTCTTCA  
TATCTCTCCGGCCACCACTGGTCCATATCGATACTCACGTGTCCGTCAGAGTATGTTCCAGCTCACC  
+  
FFFFFFFFFFFFFFFFFFFFFFFFFFFFFFFFFFFFFFFFFFFFFFFFFFFFFFFFFFFFFFFFFFFFFFFF:F:FFFFFFFFFFFF,FF:  
F:FFFFFFFFFFFFFFFFFFFFFFFFFFFFFFFFFFFFFFFFFFFFFFFFFFFFFFFFFFFFFFFFFFFFFFFF:FFF:FFFF  
@A00155:342:HHGFNDSXY:1:2153:8983:32456 1:N:0:GAACCTAG+TCCGCATA  
TGGTAGTCAGGGTAGTTTTCTCCCTGCTCCACCTGGCCACGAGTCAAACTAGCCTCTTCTTCATA  
TCTCTCCGGCCACCACTGGTCCATATCGATACTCACGTGTCCGTCAGAGTATGTTCCAGCTCACCTT  
+  
:FFFFFFFFFFFFFFFFFFFFFFFFFFFFFFFFFFFFFFFFFFFFFFFFFFFFFFFFFFFFFFFFFFFFFFFF  
FFFFFFFFFFFFFFFFFFFFFFFFFFFFFFFFFFFFFFFFFFFFFFFFFFFFFFFFFFFFFFFFFFFFFFFF  
@A00155:342:HHGFNDSXY:1:1507:2944:1892 2:N:0:GAACCTAG+TCCGCATA  
GGTAGTCAGGGTAGTTTTCTCCCTGCTCCACCTGGCCACGAGTCAAACTAGCCTCTTCTTCATAT  
CTCTCCGGCCACCACTGGTCCATATCGATACTCACGTGTCCGTCAGAGTATGTTCCAGCTCACCTTT  
+  
FF:FFFFFFFFFFFF,FFFFFFFFFFFFFFFFFFFFFFFFFFFFFFFFFFFFFFFFFFFFFFFFFFFFFFFF  
FFFFFFFF:FFFFFFFFFFFF,FFFFFFFFFFFFFFFF,FFF:FFFFFFFFFFFFFFFFFFFFFFFF:FFF:F  
@A00155:342:HHGFNDSXY:1:1507:2935:1720 2:N:0:GAACCTAG+TCCGCATA  
GGTAGTCAGGGTAGTTTTCTCCCTGCTCCACCTGGCCACGAGTCAAACTAGCCTCTTCTTCATAT  
CTCTCCGGCCACCACTGGTCCATATCGATACTCACGTGTCCGTCAGAGTATGTTCCAGCTCACCTTT  
+  
F:FFFFF::FFFFFFFF,FFFFFFFFFFFFFFFFFFFFFFFFFFFFFFFFFFFFFFFFFFFFFFFFFFFFFFFF  
FFF:FFFFFFFFFFFFFFFF:FF,FFF:FFF,:F:FF,FFFFFFFFFFFFFFFFFFFFFFFFFFFFFFFF  
@A00155:342:HHGFNDSXY:1:2567:23240:24799 2:N:0:GAACCTAG+TCCGCATA  
GGTAGTCAGGGTAGTTTTCTCCCTGCTCCACCTGGCCACGAGTCAAACTAGCCTCTTCTTCATAT  
CTCTCCGGCCACCACTGGTCCATATCGATACTCACGTGTCCGTCAGAGTATGTTCCAGCTCACCTTT  
+  
FFFFFFFFFFFFFFFFFFFFFFFFFFFFFFFFFFFFFFFFFFFFFFFFFFFFFFFFFFFFFFFFFFFFFFFF  
FFFFFFFFFFFFFFFFFFFFFFFFFFFFFFFF:FFFFFFFFFFFF:FFFFFFFFFFFFFFFF:FFFFFFFFFFFF  
@A00155:342:HHGFNDSXY:1:1550:31286:18129 2:N:0:GAACCTAG+TCCGCATA  
GGTAGTCAGGGTAGTTTTCTCCCTGCTCCACCTGGCCACGAGTCAAACTAGCCTCTTCTTCATAT  
CTCTCCGGCCACCACTGGTCCATATCGATACTCACGTGTCCGTCAGAGTATGTTCCAGCTCACCTTT  
+  
:FFFFFFFFFF:FFFF:FFFFFFFF:FFFFF:FFFFFFFFFFFFFFFFFFFFFFFF:FFFFFFFFFFFF:F,  
FFFFFFFFFFFFFFFF:FFFFF,,FFFFFFFFFFFFFFFFFFFFFFFF:FFFFFFFFFFFF:FFFFFFFFFF  
@A00155:342:HHGFNDSXY:1:1550:28339:12211 2:N:0:GAACCTAG+TCCGCATA  
GTAGTCAGGGTAGTTTTCTCCCTGCTCCACCTGGCCACGAGTCAAACTAGCCTCTTCTTCATATC  
TCTCCGGCCACCACTGGTCCATATCGATACTCACGTGTCCGTCAGAGTATGTTCCAGCTCACCTTT  
+  
FFFFFFFFFFFFFFFFFFFFFFFF:F:FFFFF,F:FF:F:FFFFF,FFFFFFFF,:FFFFFFFFFFFF  
FFFFF::FFFFFFFFFFFFFFFF,FFFFFFFFFFFFFFFF:FFFFFFFFFFFF:FFFFFFFFFF  
@A00155:342:HHGFNDSXY:1:2163:8938:7263 1:N:0:GAACCTAG+TCCGCATA  
TAGTCAGGGTAGTTTTCTCCCTGCTCCACCTGGCCACGAGTCAAACTAGCCTCTTCTTCATATCT  
CTCCGGCCACCACTGGTCCATATCGATACTCACGTGTCCGTCAGAGTATGTTCCAGCTCACCTT  
+  
:FFFFFFF:FFFFFF,F,F:FFFFFFFF:FFF:FF:,FFF:F,FF:FFFFFFFF:F::FFFFFFF:F,  
FFFFFFFFF:FFFF,F:,FF:FFFFFFFFFFFF:FFFFFFFFFFFF,FF:F:F:FFFFFFFFFFFF

@A00155:342:HHGFNDSXY:1:1148:5837:12195 1:N:0:GAACCTAG+TCCGCATA  
 TAGTCAGGGTAGTTTTCTCCCCTGCTCCACCTGGCCACGAGTCAAACTAGCCTCTTCTTCATATCT  
 CTCCGGCCACCACTGGTCCATATCGATACTCACGTGTCCGTCAGAGTATGTTCCCAGCTCACCTTTC  
 +  
 FFFFFFFFFF:FFFFFFFFFFFFFF:FFFFFFFFFFFFFF:FFFFFFF,FF,FFFFFFFFFFFFFFF  
 FFFFFFFFFFFFFFFF:FFFF:FFFFFFFFFFFFFF:FFFF,FF:FF:FFFFFF:FFF:FF  
 @A00155:342:HHGFNDSXY:1:1475:13141:31454 2:N:0:GAACCTAG+TCCGCATA  
 GTCAGGGTAGTTTTCTCCCCTGCTCCACCTGGCCACGAGTCAAACTAGCCTCTTCTTCATATCTCT  
 CCGGCCACCACTGGTCCATATCGATACTCACGTGTCCGTCAGAGTATGTTCCCAGCTCACCTTTC  
 +  
 FFF:FFFFFFFFFFFFFF,FFFFFFFFFFFFFF:FFFFFFFFFFFFFF:FFFFFFFFFFFFFF  
 FFFFFFFFFFFFFFFF:FFFFFFFFFFFFFF:FFF:FFFFFFFFFFFFFF  
 @A00155:342:HHGFNDSXY:1:2268:31919:23202 1:N:0:GAACCTAG+TCCGCATA  
 CAGGGTAGTTTTCTCCCCTGCTCCACCTGGCCACGAGTCAAACTAGCCTCTTCTTCATATCTCTCC  
 GGCCACCACTGGTCCATATCGATACTCACGTGTCCGTCAGAGTATGTTCCCAGCTCACCTTTCAGCGA  
 +  
 FFFFFFFFFFFFFFFF:FFFFFFFFFFFFFF:FFF:FFFFFFFFFFFFFF  
 @A00155:342:HHGFNDSXY:1:2526:5213:20760 2:N:0:GAACCTAG+TCCGCATA  
 AGGGTAGTTTTCTCCCCTGCTCCACCTGGCCACGAGTCAAACTAGCCTCTTCTTCATATCTCTCCG  
 GCCACCACTGGTCCATATCGATACTCACGTGTCCGTCAGAGTATGTTCCCAGCTCACCTTTCAGCGAT  
 +  
 FFFFFFFF,,FFFFFFFF:FFFFFFFFFFFFFF:FFFFFFFFFFFFFF:FFFFFFFFFFFFFF  
 FFFFFFFFFFFFFFFF:FFFFFFFFFFFFFF:FFF:FFFFFFFFFFFFFF  
 @A00155:342:HHGFNDSXY:1:2324:5782:10942 1:N:0:GAACCTAG+TCCGCATA  
 GGTAGTTTTCTCCCCTGCTCCACCTGGCCACGAGTCAAACTAGCCTCTTCTTCATATCTCTCCGGC  
 CACCACTGGTCCATATCGATACTCACGTGTCCGTCAGAGTATGTTCCCAGCTCACCTTTCAGCG  
 +  
 FFFFFFFFFFFFFFFF:FFFFFFFFFFFFFF,FFFFFFFFFFFFFF  
 @A00155:342:HHGFNDSXY:1:2250:28357:25833 1:N:0:GAACCTAG+TCCGCATA  
 GGTAGTTTTCTCCCCTGCTCCACCTGGCCACGAGTCAAACTAGCCTCTTCTTCATATCTCTCCGGC  
 CACCACTGGTCCATATCGATACTCACGTGTCCGTCAGAGTATGTTCCCAGCTCACCTTTCAGCG  
 +  
 FFFFFFFFFFFFFFFF:F:FFFFFFFFFFFFFF  
 FFFFFFFFFFFFFFFF:FFFFFFFFFFFFFF  
 @A00155:342:HHGFNDSXY:1:1363:3830:6621 2:N:0:GAACCTAG+TCCGCATA  
 GGTAGTTTTCTCCCCTGCTCCACCTGGCCACGAGTCAAACTAGCCTCTTCTTCATATCTCTCCGGC  
 CACCACTGGTCCATATCGATACTCACGTGTCCGTCAGAGTATGTTCCCAGCTCACCTTTCAGCGATCC  
 +  
 FFFF:FFFFFFFFFFFFFF:FFFFFFFFFFFFFF:FFF,FFFFFF:FFF  
 FFFFFFFFFFFFFFFF:FFFFFFFFFFFFFF:FFFFFFFFFFFFFF:FFFFFFFFFFFFFF:  
 @A00155:342:HHGFNDSXY:1:2112:18295:11068 2:N:0:GAACCTAG+TCCGCATA  
 GGTAGTTTTCTCCCCTGCTCCACCTGGCCACGAGTCAAACTAGCCTCTTCTTCATATCTCTCCGGC  
 CACCACTGGTCCATATCGATACTCACGTGTCCGTCAGAGTATGTTCCCAGCTCACCTTTCAGCGATCC  
 +  
 FF:FFF:FFFFFFFFFFFFFF:FFFFFFFFFFFFFF:FFF,FFFFFF:FFF  
 FFFFFFFFFFFFFFFF:FFFFFFFFFFFFFF:FFFFFFFFFFFFFF:FFFFFFFFFFFFFF:  
 @A00155:342:HHGFNDSXY:1:2112:18304:11052 2:N:0:GAACCTAG+TCCGCATA  
 GGTAGTTTTCTCCCCTGCTCCACCTGGCCACGAGTCAAACTAGCCTCTTCTTCATATCTCTCCGGC  
 CACCACTGGTCCATATCGATACTCACGTGTCCGTCAGAGTATGTTCCCAGCTCACCTTTCAGCGATCC  
 +  
 FFFFFFFFFFFFFFFF:FFFFFFFFFFFFFF:FFFFFF:FFFFFF:FFFF

[illegible]

@A00155:342:HHGFNDSXY:1:1608:31376:3223 2:N:0:GAACCTAG+TCCGCATA  
TTCCTCCCCTGCTCCACCTGGCCACGAGTCAAACTAGCCTCTTCTTCATATCTCTCCGGCCACCACT  
GGTCCATATCGATACTCACGTGTCCGTCAGAGTATGTTCCAGCTCACCTTTCAGCGATCCCTCATTA  
+  
:FFF,FF,FFFFFFFFFFFFFFFF:FFFFFFFFFFFFFFFFFFFFFFFF:FFFFFFFFFFFFFFFF:FF  
FFFFFFFFFFFFFFFFFFFFFFFFFFFFFFFFFFFFFFFFFFFFFFFFFFFFFFFFFFFFFFFF:FFF  
@A00155:342:HHGFNDSXY:1:2608:26992:13823 2:N:0:GAACCTAG+TCCGCATA  
TTCCTCCCCTGCTCTACCTGGCCACGAGTCAAACTAGCCTCTTCTTCATATCTCTCCGGCCACCACT  
GGTCCATATCGATACTCACGTGTCCGTCAGAGTATGTTCCAGCTCACCTTTCAGCGATCCCTCATTA  
+  
FFFFFFFFFFFFFF:F:FFFFFFFFFFFF,,FFFFFFFFFFFFFFFF:FF:FFFFFFFFFFFFFFFF  
FFFFFFFF:FFFFFF:FFFFFFFFFFFFFFFF:FFFFFFFFFFFFFFFF,FFFFFFFFFFFFFFFF  
@A00155:342:HHGFNDSXY:1:1658:12816:31454 2:N:0:GAACCTAG+TCCGCATA  
TTCCTCCCCTGCTCCACCTGGCCACGAGTCAAACTAGCCTCTTCTTCATATCTCTCCGGCCACCACT  
GGTCCATATCGATACTCACGTGTCCGTCAGAGTATGTTCCAGCTCACCTTTCAGCGATCCCTCATTA  
+  
FFFFFFFFFFFFFFFFFFFFFFFFFFFFFFFFFFFFFFFFFFFFFFFFFFFFFFFFFFFFFFFF:~  
FFFFFFFFFFFFFFFF:FFFFFFFFFFFFFFFFFFFFFFFFFFFFFFFFFFFFFFFFFFFFFFFF  
@A00155:342:HHGFNDSXY:1:2139:18059:1767 2:N:0:GAACCTAG+TCCGCATA  
TTCCTCCCCTGCTCCACCTGGCCACGAGTCAAACTAGCCTCTTCTTCATATCTCTCCGGCCACCACT  
GGTCCATATCGATACTCACGTGTCCGTCAGAGTATGTTCCAGCTCACCTTTCAGCGATCCCTCATTA  
+  
FFFFFFFFF:FFFFFFFFFFFFFFFFFFFFFFFFFFFFFFFFFFFFFFFFFFFFFFFFFFFFFFFF:~  
FFFFFFFFFFFFFFFFFFFFFFFFFFFFFFFFFFFFFFFFFFFFFFFF:FFFFFFFFF:FFFFFFFFF:~  
@A00155:342:HHGFNDSXY:1:2560:17626:36620 2:N:0:GAACCTAG+TCCGCATA  
GCCTCCCCTGCTCCACCTGGCCACGAGTCAAACTAGCCTCTTCTTCATATCTCTCCGGCCACCACTG  
GTCCATATCGATACTCACGTGTCCGTCAGAGTATGTTCCAGCTCACCTTTCAGCGATCC  
+  
FFFFFFFFF:F:FFFFFFFFFFFFFFFFFFFFFFFFFFFFFFFFFFFFFFFFFFFFFFFF:~  
F:F:FFFF:FFFFFFFFF,FFFFFFFFFFFFFFFFFFFFFFFFF,F:F:F:FFFFF  
@A00155:342:HHGFNDSXY:1:1607:25138:20917 2:N:0:GAACCTAG+TCCGCATA  
TCCTCCCCTGCTCCACCTGGCCACGAGTCAAACTAGCCTCTTCTTCATATCTCTCCGGCCACCACTG  
GTCCATATCGATACTCACGTGTCCGTCAGAGTATGTTCCAGCTCACCTTTCAGCGATCCCTCATTA  
+  
FFFFFFFFFFFFFFFFFFFFFFFFFFFFFFFFFFFFFFFFFFFFFFFF,FFFFFFFFFFFFFFFFFFFFFFFF  
FFFF:FFF:FFFFFFFFF,FFFFFFFFFFFFFFFF:FFFFFF,FFF:FFFFFFFF:FFFFF:FF  
@A00155:342:HHGFNDSXY:1:1449:7518:10911 2:N:0:GAACCTAG+TCCGCATA  
TCCTCCCCTGCTCCACCTGGCCACGAGTCAAACTAGCCTCTTCTTCATATCTCTCCGGCCACCACTG  
GTCCATATCGATACTCACGTGTCCGTCAGAGTATGTTCCAGCTCACCTTTCAGCGATCCCTCATTA  
+  
:FFFFFFFFFFFFFFFFFFFFFFFFFFFFFFFFFFFFFFFFFFFFFFFFFFFFFFFFFFFFFFFF  
FFFFFFFFFFFFFFFFFFFFFFFFFFFFFFFFFFFFFFFFFFFFFFFFFFFFFFFFFFFFFFFF  
@A00155:342:HHGFNDSXY:1:1632:18087:19758 2:N:0:GAACCTAG+TCCGCATA  
TCCTCCCCTGCTCCACCTGGCCACGAGTCAAACTAGCCTCTTCTTCATATCTCTCCGGCCACCACTG  
GTCCATATCGATACTCACGTGTCCGTCAGAGTATGTTCCAGCTCACCTTTCAGCGATCCCTCATTA  
+  
FFFFFFFFFFFFFFFFFFFFFFFFFFFFFFFFFFFFFFFFFFFFFFFF,FFFFFFFFFFFFFFFFFFFFFFFF  
FFFF:~:FFFFFFFFFFFFFFFFFFFFFFFFFFFFFFFF:FFFFF:FFFFFFFFFFFFFFFF:FF  
@A00155:342:HHGFNDSXY:1:2677:7563:19319 2:N:0:GAACCTAG+TCCGCATA  
TCCTCCCCTGCTCCACCTGGCCACGAGTCAAACTAGCCTCTTCTTCATATCTCTCCGGCCACCACTG  
GTCCATATCGATACTCACGTGTCCGTCAGAGTATGTTCCAGCTCACCTTTCAGCGATCCCTCATTA  
+  
F:FFFFFFFFFFFFFFFFFFFFFFFFFFFFFFFFFFFFFFFFFFFFFFFFFFFFFFFFFFFFFFFF  
FFFFF,FFFFFFFFFFFFFFFF:FFFFFFFFFFFFFFFF:FFFFFFFFF,FFFFF,



[illegible]

@A00155:342:HHGFNDSXY:1:1673:6090:6277 2:N:0:GAACCTAG+TCCGCATA  
ACCTGGCCACGAGTCAAACTAGCCTCTTCTTCATATCTCTCCGGCCACCACTGGTCCATATCGATAC  
TCACGTGTCCGTCAGAGTATGTTCCCAGCTCACCTTTCAGCGATCCCTCATTAGATTCTTGCATCTTC  
+  
FFFF:FF:FFFFFF:F,F,FFFFFFFF:FFFFFFFFFFFFFF:F:FFFFFFFFFFFFFFF  
FFFFFFFFFFFFFFFFFFFF:FFFFFFFFFFFFFF:FFFFFFFFFFFFFF:FF:FFFFFFF  
@A00155:342:HHGFNDSXY:1:2560:17626:36620 1:N:0:GAACCTAG+TCCGCATA  
CCTGGCCACGAGTCAAACTAGCCTCTTCTTCATATCTCTCCGGCCACCACTGGTCCATATCGATACT  
CACGTGTCCGTCAGAGTATGTTCCCAGCTCACCTTTCAGCGATCCCTCATTAGATTCTTG  
+  
FFFFFFFFFFFFFFFFFFFFFFFFFFFFFFFFFFFFFFFF:FFFFFFFFFFFFFFFFFFFFFF,FF  
FFFFF:FFFFFFFFFFFFFFFF:FFFFFFFFF:FFFFFFFFF:F:FFF:F:FFF  
@A00155:342:HHGFNDSXY:1:2451:29288:1642 1:N:0:GAACCTAG+TCCGCATA  
CTGGCCACGAGTCAAACTAGCCTCTTCTTCATATCTCTCCGGCCACCACTGGTCCATATCGATACTC  
ACGTGTCCGTCAGAGTATGTTCCCAGCTCACCTTTCAGCGATCCCTCATTAGATTCTTGCATCTTCAT  
+  
FFFFFFFFFFFFFFFFFFFFFFFFFFFFFFFFFFFFFFFFFFFFFFFFFFFFFFFFFFFFFFFFFFFF  
FFFFFFFFFFFFFFFFFFFFFFFFFFFFFFFFFFFFFFFF:FFFFFFFFFFFFFFFFFFFF,FFFFFFF  
@A00155:342:HHGFNDSXY:1:2324:5782:10942 2:N:0:GAACCTAG+TCCGCATA  
CTGGCCACGAGTCAAACTAGCCTCTTCTTCATATCTCTCCGGCCACCACTGGTCCATATCGATACTC  
ACGTGTCCGTCAGAGTATGTTCCCAGCTCACCTTTCAGCGATCCCTCATTAGATTCTTGCATCTTCAT  
+  
FFFFFFFFF:FFFFFFFFFFFF:FFFFF:FFFFFFFFFFFFFFFFFFFFFFFFFFFF:FFFFFFFFF  
FFFFFFFFFFFFFFFFFFFFFFFFFFFFFFFFFFFFFFFFFFFFFFFFFFFFFFFFFFFF:FFFFFFFFFFFFF  
@A00155:342:HHGFNDSXY:1:1274:29559:20744 1:N:0:GAACCTAG+TCCGCATA  
TGGCCACGAGTCAAACTAGCCTCTTCTTCATATCTCTCCGGCCACCACTGGTCCATATCGATACTCA  
CGTGTCCGTCAGAGTATGTTCCCAGCTCACCTTTCAGCGATCCCTCATTAGATTCTTGCATCTTCATC  
+  
FFFFFFFFFFFFFFFFFFFFFFFFFFFFFFFFFFFFFFFF:FFFFFFFFFFFFFFFFFFFFFFFFFFFF  
FFFFFFFFFFFF:FFFFFFFFFFFFFFFFFFFFFFFFFFFFFFFFFFFFFFFFFFFFF:F:FFFFF  
@A00155:342:HHGFNDSXY:1:2677:19768:20823 1:N:0:GAACCTAG+TCCGCATA  
TGGCCACGAGTCAAACTAGCCTCTTCTTCATATCTCTCCGGCCACCACTGGTCCATATCGATACTCA  
CGTGTCCGTCAGAGTATGTTCCCAGCTCACCTTTCAGCGATCCCTCATTAGATTCTTGCATCTTCATC  
+  
FFFFFFFFFFFFFFFFFFFFFFFFFFFFFFFFFFFFFFFFFFFFFFFFFFFFFFFFFFFFFFFFFFFF  
FFFFFFFFFFFFFFFFFFFF,FFFFFFFFFFFFFFFFFFFF,FFFFFFFFF:FFFFF:FFF,FFF  
@A00155:342:HHGFNDSXY:1:2567:8196:15123 2:N:0:GAACCTAG+TCCGCATA  
GGCCACGAGTCAAACTAGCCTCTTCTTCATATCTCTCCGGCCACCACTGGTCCATATCGATACTCAC  
GTGTCCGTCAGAGTATGTTCCCAGCTCACCTTTCAGCGATCCCTCATTAGATTCTTGCATCTTCATCA  
+  
FFFFFFFF:FFFFFFFFFFFF,FFFFFFFFF:FFFF:FFFFFFFF:FFFFFFF:,FF:FFF,FFF  
:FFFF:FFFFFFFFFFFFFFFFFFFF:FFFF:FFFFFFFFFFFF:FFFFFFFFFFFF,FFFF:FFF  
@A00155:342:HHGFNDSXY:1:2475:22001:4523 2:N:0:GAACCTAG+TCCGCATA  
GGCCACGAGTCAAACTAGCCTCTTCTTCATATCTCTCCGGCCACCACTGGTCCATATCGATACTCAC  
GTGTCCGTCAGAGTATGTTCCAGCTCACCTTTCAGCGATCCCTCATTAGATTCTTGCATCTTCATCA  
+  
::FFFFFFFFF::,FFFF::FFFFFFFFFFFFFFFF,FFFF,,FFF,FFF,::,FFF:FFFFF:F:  
:FFFFF:F:F::FF:FFFF,FF:FF::F::FF,FFF:F:,::,,F:F:FFFFFFFF:FF:FFFFFFF  
@A00155:342:HHGFNDSXY:1:2152:31304:5948 2:N:0:GAACCTAG+TCCGCATA  
GCCATGAGTCAAACTAGCCTCTTCTTCATATCTCTCCGGCCACCACTGGTCCATATCGATACTCACG  
TGTCCGTCAGAGTATGTTCCCAGCTCACCTTTCAGCGATCCCTCATTAGATTCTTGCATCTTCAT  
+  
FFFFFFFFF:FFF:FFFFFFFFFFFFFFFFFFFF:FFFFFFFFFFFFFFFFFFFFFFFFFFFFF:FF  
:FFFFFFFFFFFFF:F:FFFFFFFFFFFFFFFFFFFF:FFFFF:FFFFFFFFFFFFFFFFFFFF:F

@A00155:342:HHGFNDSXY:1:2246:25111:14888 2:N:0:GAACCTAG+TCCGCATA  
CCACGAGTCAAACCTAGCCTCTTCTTCATATCTCTCCGGCCACCACTGGTCCATATCGATACTCACGT  
GTCCGTCAGAGTATGTTCCCAGCTCACCTTTCAGCGATCCCTCATTAGATTCTTGCATCTTCAT

```

FFFFFFFFFFFFFFFFFFFFFFFFFFFFFFFFFFFFFFFFFFFFFFFFFFFFFFFFFFFFF:FFFFFFFFFFFFFFF
FFFFFFFFFFFFFFF:FFFFFFF:FFFFFFFFFFFFFFFFFFFFFFFFFFFFFFFFFFFFFFFFFFFFFFFFFFFFFFF
```

@A00155:342:HHGFNDSXY:1:1548:12906:9095 2:N:0:GAACCTAG+TCCGCATA  
CCACGAGTCAAACTAGCCTCTTCTTCATATCTCTCCGGCCACCACTGGTCCATATCGATACTCACGT  
GTCCGTCAGAGTATGTTCCCAGCTCACCTTTCAGCGATCCCTCATTAGATTCTTGCATCTTCATC

```
FFFFFFFFFFFFFFFFFFFFFFFFFFFFFFFFFFFFFFFFFFFFFFFFFFFFFFFFFFFFFFFFFFFFFFFFFFFFFFFFFFFFFFFFFFFFF:FFFFFFFFFFFFFF:FFFFFFFFFFFFFFFFFFFFFFFFFFFFFFFFFFFFF
FFFFFFFFFFFFFFFFFFFFFF:FFFFFFFFFFFFFFFF:F,FFFFFFFFFFFFFFFFFFFFFFFFFFFFFFFFFFFF,FFFFFFFFFFFFFFFF
```

@A00155:342:HHGFNDSXY:1:2153:14950:5682 2:N:0:GAACCTAG+TCCGCATA  
CCACGAGTCAAACCTAGCCTCTTCTTCATATCTCTCCGGCCACCACTGGTCCATATCGATACTCACGT  
GTCCGTCAGAGTATGTTCCCAGCTCACCTTTCAGCGATCCCTCATTAGATTCTTGCATCTTCATCAGC

```

FFFFFFFF:FFFFFFFFFFFFFFFFFFFFFFFFFFFFFFFFFFFFFFFFFFFFFFFFFFFFFFFFFFFFFFFF:FF
FFFFFFFFFFFFFFFF:FFFFFFFFFFFFFFFFFFFFFFFFFFFFFFFF:FFFFFFFFFFFFFFFFFFFFFFFF

```

@A00155:342:HHGFNDSXY:1:1139:32678:11428 1:N:0:GAACCTAG+TCCGCATA  
CCACGAGTCAAACCTAGCCTCTTCTTCATATCTCTCCGGCCACCACTGGTCCATATCGATACTCACGT  
GTCCGT CAGAGTATGTTCCAGCTCACCTTTCAGCGATCCCTCATTAGATTCTTGCATCGTCATCAGC

```

+
FFFFFFFFFFFFFFFFFFFFFFFF::F:FFFFFFFFFFFFFFFFFFFFFFFFFFFFFFFF:FFFFFFFFFFFFFFFF

```

FFFFFFFFFFFFFFFF:FF:FFFFFFFFFFFFFFFF:FF:FFF:,FFF:FFFFFFFFFFFFFFFF::F,FFF,FFFF  
@A00155:342:HHGFNDSXY:1:2450:32524:7216 2:N:0:GAACCTAG+TCCGCATA

CCACGAGTCAAACTAGCCTCTTCTTCATATCTCTCCGGCCACCACTGGTCCATATCGATACTCACGT  
GTCCGT CAGAGTATGTTCCCAGCTCACCTTTCAGCGATCCCTCATTAGATTCTTGCATCTTCATCCGC  
+

FFFFFFFFFFFFFFFF, ,FFF,FFFFFFFF: ,FFFFFFFFFFFF:FFFFFF,FFFFFFFFFFFFFFFF,FFFFFFFF,  
FFFFFFFFFFFFFF:F,F,FFFFFFFF,F:FFF:FF:FFFFFFFF:FFF,FFF:FF:FFFFF:,FF,FF,FF

@A00155:342:HHGFNDSXY:1:2161:12825:3630 2:N:0:GAACCTAG+TCCGCATA  
CCACGAGTCAAACTAGCCTCTTCTTCATATCTCTCCGGCCACCACTGGTCCATATCGATACTCACGT  
GTCCGTCAGAGTATGTTCCCAGCTCACCTTTCAGCGATCCCTCATTAGATTCTTGCATCTTCATCAGC

[illegible]

```

FFFFFFFFFFFFFFFFFFFFFFFFFFFFFFFFFFFFFFFFFFFFFFFFFFFFFFFFFFFFFFFFFFFFFFFFFFFFFFFF
@A00155:342:HHGFNDSXY:1:2264:11496:31015 1:N:0:GAACCTAG+TCCGCATA
CCACGAGTCAAACCTAGCCTCTTCTTCATATCTCTCCGGCCACCACTGGTCCATATCGATACTCACGT

```

GTCCGTCAGAGTATGTTCCCAGCTCACCTTTCAGCGATCCCTCATTAGATTCTTGCATCTTCATCAGC  
+

[illegible]

@A00155:342:HHGFNDSXY:1:2153:21685:3662 2:N:0:GAACCTAG+TCCGCATA  
CCACGAGTCAAACTAGCCTCTTCTTCATATCTCTCCGGCCACCACTGGTCCATATCGATACTCACGT

GTCCGTCAGAGTATGTTCCCAGCTCACCTTTCAGCGATCCCTCATTAGATTCTTGCATCTTCATCAGC  
+

```

FFFFFFFF,FFFFFFFFFFFFFFFFFFFFFFFF:FFFFFFFFFFFFFFFF:FFFFFFFF:FFFFFFFF:FFF
FFFFFFFFFFFFFFFFFFFFFFFFFFFFFFFFFFFFFFFFFFFFFFFF,F:FFFFFFFFFFFFFFFFFFFFFFFF
1432155,5103440ENR0N41,1153,12523,32751,11,0,0143215,72332471

```

@A00155:342:HHGFNDXXY:1:1156:13/20:337/1 2:N:0:GAACCTAG+TCCGCAIA  
CCACGAGTCAAACTAGCCTCTTCTTCATATCTCTCCGGCCACCACTGGTCCATATCGATACTCACGT  
GTCCGTCAGAGTATGTTCCAGCTCACCTTTCAGCGATCCCTCATTAGATTCTTGATCTTCATCAGC

GTCCGT CAGAGTATGT TCCAGATCACCCTTCAGCGATCCCTTCATTAGATTCTTGCATCTTCATCAGC  
+  
E...EE EEEEEEEEEEEEEEE.EEEEEEEEEEE.EEEEEEEEEEEEEEEEEEEEEEE.EEEEEEEEEEE

FFFFFFFFFFFFFFFF,FFFFFFFFFFFFFFFF,FFFFFFFFFFFFFFFFFFFFFFFFFFFFFFFFFFFFFFFFFFFFFFFF

[illegible]

@A00155:342:HHGFNDSXY:1:2268:31919:23202 2:N:0:GAACCTAG+TCCGCATA  
CCACGAGTCAAACTAGCCTCTTCTTCATATCTCTCCGGCCACCACTGGTCCATATCGATACTCACGT  
GTCCGTCAGAGTATGTTCCCAGCTCACCTTTCAGCGATCCCTCATTAGATTCTTGCATCTTCATCAGC  
+  
FFFFFFFFFFFF:FFF:FFFFFFFFFFFFFFFFFFFFFFFFFFFFFFFFFFFFFFFFFFFFFFFFFFFFF  
FFFFFFFFFFFFFFFFFFFFFFFFFFFFFFFFFFFFFFFFFFFFFFFFFFFFFFFFFFFFFFFFFFFFFFFFF  
@A00155:342:HHGFNDSXY:1:1156:13720:33771 1:N:0:GAACCTAG+TCCGCATA  
CCACGAGTCAAACTAGCCTCTTCTTCATATCTCTCCGGCCACCACTGGTCCATATCGATACTCACGT  
GTCCGTCAGAGTATGTTCCCAGCTCACCTTTCAGCGATCCCTCATTAGATTCTTGCATCTTCATCAGC  
+  
FFFFFFFFFFFFFFFFFFFFFFFFFFFFFFFFFFFFFFFFFFFFFFFFFFFFFFFFFFFFFFFFFFFFFFFFF  
FFFFFFFFFFFF:FFFFFFFFFFFFFFFFFFFFFFFFFFFFFFFFFFFFFFFFFFFFFFFFFFFFFFFFFFFF  
@A00155:342:HHGFNDSXY:1:1303:8133:33019 2:N:0:GAACCTAG+TCCGCATA  
CACGAGTCAAACTAGCCTCTTCTTCATATCTCTCCGGCCACCACTGGTCCATATCGATACTCACGTG  
TCCGTCAGAGTATGTTCCCAGCTCACCTTTCAGCGATCCCTCATTAGATTCTTGCATCTTCATC  
+  
FFFFFFF:FFFFFFFFFFFFFFFFFFFFFF,FFFFFFFFFFFFFFFFFFFFFFFFFFFFFFFFFFFFFFFFF  
FFF:FFFFFFFFFFFFFFFFFFFFFFFFFFFFFFFFFFFFFFFFFFFFFFFFFFFFFFFFFFFFFFFFFFFF  
@A00155:342:HHGFNDSXY:1:1303:4408:14481 2:N:0:GAACCTAG+TCCGCATA  
CACGAGTCAAACTAGCCTCTTCTTCATATCTCTCCGGCCACCACTGGTCCATATCGATACTCACGTG  
TCCGTCAGAGTATGTTCCCAGCTCACCTTTCAGCGATCCCTCATTAGATTCTTGCATCTTCATCAGC  
+  
FFFFFFFFFFF:FFFFFFF,:FFFF,FFFFFFFFFFFFFF:FFFFFFF:,FFFFFFFFFFFFFFFFFFFF  
FFFFFFFFFFFF:FFFFFFFFFFFFFFFFFFFFFFFFFFFFFFFFFFFFFFFFFFFFFFFFFFFF:FFFFFFF:FFF:F:FFFF  
@A00155:342:HHGFNDSXY:1:2373:11216:7952 2:N:0:GAACCTAG+TCCGCATA  
CACGAGTCAAACTAGCCTCTTCTTCATATCTCTCCGGCCACCACTGGTCCATATCGATACTCACGTG  
TCCGTCAGAGTATGTTCCCAGCTCACCTTTCAGCGATCCCTCATTAGATTCTTGCATCTTCATCAGC  
+  
FFFFFFFFFFFFFFFFFFFFFFFFFFFFFFFFFFFFFFFFFFFFFFFFFFFFFFFFFFFFFFFFFFFFFFFFF  
FFFFFFFFFFFFFFFFFFFFFFFFFFFFFFFFFFFFFFFFFFFFFFFFFFFFFFFFFFFFFFFFFFFFFFFFF  
@A00155:342:HHGFNDSXY:1:1537:7500:32330 1:N:0:GAACCTAG+TCCGCATA  
ACGAGTCAAACTAGCCTCTTCTTCATATCTCTCCGGCCACCACTCGTCCATATCGATACTCACGTGT  
CCGTCAGAGTATGTTCCCAGCTCACCTTTCAGCGATCCCTCATTAGATTCTTGCATCTTCATCAGCAT  
+  
FFFFFFF:FFFFFFFFFFFFFFFFFFFFFFFFFFFFFFFFFFFFFFFFFFFFFFFFFFFFFFFFFFFFFFFFF  
FFFFFFFFFFFFFFF,FFFFFFFFFF,FF:FFF:FFF,FF:FFFFFFFF:FFFFFFF,,,:F,FF:FF:F  
@A00155:342:HHGFNDSXY:1:2334:15212:19194 1:N:0:GAACCTAG+TCCGCATA  
ACGAGTCAAACTAGCCTCTTCTTCATATCTCTCCGGCCACCACTGGTCCATATCGATACTCACGTGT  
CCGTCAGAGTATGTTCCCAGCTCACCTTTCAGCGATCCCTCATTAGATTCTTGCATCTTCATCAGCAT  
+  
FFFFFFFFFFFF:FFFFFFFFFFFFFFFFFFFFFFFFFFFFFFFFFFFFFFFFFFFFFFFFFFFFFFFFFFFF  
FFFFF:FFFF:FF:FFFFFFFFFFFFFFFFFFFFFFFFFFFFFFFFFFFF:FFFFFFFFFFFFFFF:FFFFFFFFFFFF  
@A00155:342:HHGFNDSXY:1:1677:20302:7185 2:N:0:GAACCTAG+TCCGCATA  
CGAGTCAAACTAGCCTCTTCTTCATATCTCTCCGGCCACCACTGGTCCATATCGATACTCACGTGTC  
CGTCAGAGTATGTTCCCAGCTCACCTTTCAGCGATCCCTCATTAGATTCTTGCATCTTCATCAGC  
+  
FFFFFFFFFFFFF,FFFFFFFFFFFFFFFFFFFF:FFFFFFFFFFFF:FFFFFFFFFFFF:FFFFFFFFFFFF:F  
FFFFFFFFFFFFFFF:FFFFFFFFFFFFFFF:FFFFFFFFFFFFFFFFFFFFFFFFFFFFFFFFFFFFFFFFF  
@A00155:342:HHGFNDSXY:1:2660:18023:21997 1:N:0:GAACCTAG+TCCGCATA  
CGAGTCAAACTAGCCTCTTCTTCATATCTCTCCGGCCACCACTGGTCCATATCGATACTCACGTGTC  
CGTCAGAGTATGTTCCCAGCTCACCTTTCAGCGATCCCTCATTAGATTCTTGCATCTTCATCAGCATG  
+  
FFFFFFFFFFFFFFFFFFFFFFFFFFFFFFFFFFFFFFFFFFFFFFFFFFFFFFFFFFFFFFFFFFFFFFFFF  
FFFFFFFFFFFFFFFFFFFFFFFFFFFFFFFFFFFFFFFFFFFFFFFFFFFFFFFFFFFFFFFFFFFFFFFFF, ,FFFFFFFFFFFFFFFFFFFFFFFFFFFFFFFFFFFFFFFFF

```
@A00155:342:HHGFNDSXY:1:2617:22426:27461 1:N:0:GAACCTAG+TCCGCATA  
GAGTCAAAACTAGCCTCTTCTTCATATCTCTCCGGCCACCCTGGTCCATATCGATACTCACGTGTCC  
GTCAGAGTATGTTCCCAGCTCACCTTTACGCGATCCCTCATTAGATTCTTG CATCTTCATCAGCATGC  
+  
FFFFFFFFFFFFFFFFFFFFFFFFFFFFFFFFFFFFFFFFFFFFFFFFFFFFFFFFFFFFFFFFFFFFF  
FFFFFFFFFFFFFFFFFFFFFFFFFFFFFFFFFFFFFFFFFFFFFFFFFFFFFFFFFFFFFFFFFFFFF:  
@A00155:342:HHGFNDSXY:1:2533:7129:1595 1:N:0:GAACCTAG+TCCGCATA  
GAGTCAAAACTAGCCTCTTCTTCATATCTCTCCGGCCACCCTGGTCCATATCGATACTCACGTGTCC  
GTCAGAGTATGTTCCCAGCTCACCTTTACGCGATCCCTCAT TAGATTCTTG CATCTTCATCAGCATGC  
+  
FFFFFFFFFFFFFFFFFFFFFFFFFFFFFFFFFFFFFFFFFFFFFFFFFFFFFFFFFFFFFFFFFFFFF  
FFFFFFFFFFFFFFFFFFFFFFFFFFFFFFFFFFFFFFFFFFFFFFFFFFFFFFFFFFFFFFFFFFFFF:  
@A00155:342:HHGFNDSXY:1:2362:8748:10692 1:N:0:GAACCTAG+TCCGCATA  
GAGTCAAAACTAGCCTCTTCTTCATATCTCTCCGGCCACCCTGGTCCATATCGATACTCACGTGTCC  
GTCAGAGTATGTTCCCAGCTCACCTTTACGCGATCCCTCAT TAGATTCTTG CATCTTCATCCGCATGC  
+  
FFFFFFFFFFFFFFF:FFF:FFFFFFFFFFFFFFF:FFFFFFFFFFFFFFFFFFFFFFFFFFFFF:FFFFFFFFFFFFFFFFFFFFF  
FFFFFFFFFFFFFFFFFFFFFFFFFFFFFFFFFFFFFFFFFFFFFFFFFFFFFFFFFFFFFFFFFFFFF:FFFFFFF,:FFFFF  
@A00155:342:HHGFNDSXY:1:1673:6090:6277 1:N:0:GAACCTAG+TCCGCATA  
GAGTCAAAACTAGCCTCTTCTTCATATCTCTCCGGCCACCCTGGTCCATATCGATACTCACGTGTCC  
GTCAGAGTATGTTCCCAGCTCACCTTTACGCGATCCCTCAT TAGATTCTTG CATCTTCATCAGCATGC  
+  
FFFFFFFFFFFFFFF,FFFFFFFFFFFFFFFFF:FFF,FFFFFFFFFFFFFFFFFFFFFFFFFFFFF,FFFFFFFFF  
FFFFFFFFFFFFFFFFFFFFFFF,FFF:F:FFFFF,FFFFFFFFFF F:FFF:FFFFFFFFFFFFFFFFF,FFFFFFF  
@A00155:342:HHGFNDSXY:1:2242:7482:19586 1:N:0:GAACCTAG+TCCGCATA  
GAGTCAAAACTAGCCTCTTCTTCATATCTCTCCGGCCACCCTGGTCCATATCGATACTCACGTGTCC  
GTCAGAGTATGTTCCCAGCTCACCTTTACGCGATCCCTCAT TAGATTCTTG CATCTTCATCAGCATGC  
+  
FFFFFFFFFFFFFFFFFFFFFFFFFFFFFFFFFFFFFFFFFFFFFFFFFFFFFFFFFFFFFFFFFFFFF  
FFFFFFFFFFFFFFFFFFFFFFFFFFFFFFFFFFFFFFFFFFFFFFFFFFFFFFFFFFFFFFFFFFFFF  
@A00155:342:HHGFNDSXY:1:1678:27715:24001 1:N:0:GAACCTAG+TCCGCATA  
GAGTCAAAACTAGCCTCTTCTTCATATCTCTCCGGCCACCCTGGTCCATATCGATACTCACGTGTCC  
GTCAGAGTATGTTCCCAGCTCACCTTTACGCGATCCCTCAT TAGATTCTTG CATCTTCATCAGCATGC  
+  
FFFFFFF,FFFF:F:FFFFFFFFFFFFFFFFFFFFFFFFFFFFFFFFFFFFFFFFFFFFFFFFFFFFF:FFF  
FFFFFFFFF:FFFFFFFFFFFFFFFFF,FFFFFFF:FFFFFFF:FFFFFFFFFFFFF:FFFFFFFFF:FFFFFFF  
@A00155:342:HHGFNDSXY:1:1549:14091:28682 1:N:0:GAACCTAG+TCCGCATA  
AGTCAAAACTAGCCTCTTCTTCATATCTCTCCGGCCACCCTGGTCCATATCGATACTCACGTGTCCG  
TCAGAGTATGTTCCCAGCTCACCTTTACGCGATCCCTCAT TAGATTCTTG CATCTTCATCAGCATGCA  
+  
FFFFFFFFFFFFFFFFFFFFFFFFFFFFFFFFFFFFFFFFFFFFFFFFFFFFFFFFFFFFFFFFFFFFF  
FFFFFFFFF:FFFFFFFFFFFFFFFFFFFFFFFFFFFFFFFFFFFFFFFFFFFFFFFFFFFFFFFFFFFFF  
@A00155:342:HHGFNDSXY:1:1460:18530:10755 1:N:0:GAACCTAG+TCCGCATA  
AGTCAAAACTAGCCTCTTCTTCATATCTCTCCGGCCACCCTGGTCCATATCGATACTCACGTGTCCG  
TCAGAGTATGTTCCCAGCTCACCTTTACGCGATCCCTCAT TAGATTCTTG CATCTTCATCAGCATGCA  
+  
FFFFFFFFFFFFFFFFFFFFFFFFFFFFF:FFFFFFFFFFFFFFFFFFFFFFFFFFFFFFFFFFFFFFFFFFFFF  
FFFFFFFFFFFFFFFFFFFFFFFFFFFFF:FFFFFFFFFFFFFFFFFFFFFFFFFFFFFFFFFFFFFFFFFFFFF:FFFFFFF  
@A00155:342:HHGFNDSXY:1:2269:29857:7764 2:N:0:GAACCTAG+TCCGCATA  
AGTCAAAACTAGCCTCTTCTTCATATCTCTCCGGCCACCCTGGTCCATATCGATACTCACGTGTCCG  
TCAGAGTATGTTCCCAGCTCACCTTTACGCGATCCCTCAT TAGATTCTTG CATCTTCATCAGCATGCA  
+
```

[illegible]

[illegible]



[illegible]

$+$ 

@A00155:342:HHGFNDSXY:1:1548:12906:9095 1:N:0:GAACCTAG+TCCGCATA  
AGCCTCTTCTTCATATCTCTCCGGCCACCACTGGTCCATATCGATACTCACGTGTCCGT CAGAGTATG  
TTCCCAGCTCACCTTTCAGCGATCCCTCATTAGATTCTTGCATCTTCATCAGCATGCAAAATCTT

+

@A00155:342:HHGFNDSXY:1:2624:17210:30420 1:N:0:GAACCTAG+TCCGCATA  
AGCCTCTTCTTCATATCTCTCCGGCCACCACTGGTCCATATCGATACTCACGTGTCCGT CAGAGTATG  
TTCCCAGCTCACCTTTCAGCGATCCCTCATTAGATTCTTGCATCTTCATCCGCATGCAAAATCTTAAC

+

@A00155:342:HHGFNDSXY:1:1604:26413:10473 2:N:0:GAACCTAG+TCCGCATA  
GCCTCTTCTTCATATCTCTCCGGCCACCACTGGTCCATATCGATACTCACGTGTCCGTCAGAGTATGT  
TCCCAGCTCACCTTTCAGCGATCCCTCATTAGATTCTTGCATCTTCATCAGCATGCAAA

+

@A00155:342:HHGFNDSXY:1:1314:8350:8688 2:N:0:GAACCTAG+TCCGCATA  
GCCTCTTCTTCATATCTCTCCGGCCACCACTGGTCCATATCGATACTCACGTGTCCGTCAGAGTATGT  
TCCCAGCTCACCTTTCAGCGATCCCTCATTAGATTCTTGCATCTTCATCAGCATGCAAAA

+

@A00155:342:HHGFNDSXY:1:1303:8133:33019 1:N:0:GAACCTAG+TCCGCATA  
GCCTCTTCTTCATATCTCTCCGGCCACCACTGGTCCATCTCGATACTCACGTGTCCGTCAGAGTATGT  
TCCCAGCTCACCTTTCAGCGATCCCTCATTAGATTCTTGATCTTCATCAGCATGCAAAATCTT

+

@A00155:342:HHGFNDSXY:1:1371:24596:10457 1:N:0:GAACCTAG+TCCGCATA  
GCCTCTTCTTCATATCTCTCCGGCCACCACTGGTCCATATCGATACTCACGTGTCCGTCAGAGTATGT  
TCCCAGCTCACCTTTCAGCGATCCCTCATTAGATTCTTGCATCTTCATCAGCATGCAAAATCTTAA

+

@A00155:342:HHGFNDSXY:1:2373:11216:7952 1:N:0:GAACCTAG+TCCGCATA  
GCCTCTTCTTCATATCTCTCCGGCCACCACTGGTCCATATCGATACTCACGTGTCCGTCAGAGTATGT  
TCCCAGCTCACCTTTCAGCGATCCCTCATTAGATTCTTGCATCTTCATCAGCATGCAAAATCTTAAC

 $+$ 

@A00155:342:HHGFNDSXY:1:1303:4408:14481 1:N:0:GAACCTAG+TCCGCATA  
GCCTCTTCTTCATATCTCTCCGGCCACCACTGGTCCATATCGATACTCACGTGTCCGTCAGAGTATGT  
TCCCAGCTCACCTTTCAGCGATCCCTCATTAGATTCTTGCATCTTCATCAGCATGCAAAATCTTAAC

+

[illegible]

@A00155:342:HHGFNDSXY:1:1460:18530:10755 2:N:0:GAACCTAG+TCCGCATA  
CTCTTCTTCATATCTCTCCGGCCACCACTGGTCCATATCGATACTCACGTGTCCGTCAGAGTATGTTC  
CCAGCTCACCTTTCAGCGATCCCTCATTAGATTCTTGCATCTTCATCAGCATGCAAA

+

FFFFF:FFFFFFFFFFFFFFFFFFFFFFFFFFFFFFFFFFFFFFFFFFFFFFFFFFFFFFFFFFFFFFFFFFFFFFFFFFFFFFFF  
FFFFFFFFFFFFFFFFFFFFFFFFFFFFFFFFFFFFFFFFFFFFFFFFFFFFFFFFFFFFFFFFFFFFFFFFFFFFFFFF

@A00155:342:HHGFNDSXY:1:2231:16929:28964 2:N:0:GAACCTAG+TCCGCATA  
CTTCTTCATATCTCTCCGGCCACCACTGGTCCATATCGATACTCACGTGTCCGTCAGAGTATGTTCCC  
AGCTCACCTTTCAGCGATCCCTCATTAGATTCTTGCATCTTCATCAGCATGCAAA

+

FFFFFFFFFFFFFFFFFFFFFFFFFFFFFFFFFFFFFFFFFFFFFFFFFFFFFFFFFFFFFFFFFFFFFFFFFFFFFFFF  
FFFFFFFFFFFFFFFFFFFFFFFFFFFFFFFFFFFFFFFFFFFFFFFFFFFFFFFFFFFFFFFFFFFFFFFFFFFFFFFF

@A00155:342:HHGFNDSXY:1:1622:15492:28103 2:N:0:GAACCTAG+TCCGCATA  
TCTTCATATCTCTCCGGCCACCACTGGTCCATATCGATACTCACGTGTCCGTCAGAGTATGTTCCCAG  
CTCACCTTTCAGCGATCCCTCATTAGATTCTTGCATCTTCATCAGCATGCAAAATCTTAACATATTAA

+

FFF:FFFFFFFFFFFFFFFFFFFFFFFFFFFFFFFFFFFFFFFFFFFFFFFFFFFFFFFFFFFFFFFFFFFFFFFFFFFFFFFF  
FFFFFFFFFFFFFFFFFFFFFFFFFFFFFFFFFFFFFFFFFFFFFFFFFFFFFFFFFFFFFFFFFFFFFFFFFFFFFFFF

@A00155:342:HHGFNDSXY:1:2634:4029:23030 2:N:0:GAACCTAG+TCCGCATA  
TCTTCATATCTCTCCGGCCACCACTGGTCCATATCGATACTCACGTGTCCGTCAGAGTATGTTCCCAG  
CTCACCTTTCAGCGATCCCTCATTAGATTCTTGCATCTTCATCAGCATGCAAAATCTTAACATATTAA

+

FFFFFFFFFF:FFFFFFFFFF:FF:F:F:FFFFFFFFFFFFFFFFFFFFFFFFFFFFFFFFFFFFFFFFFFFFFFFFFFFFF  
FFFFFFFFFFFFFFFFFFFFFFFFFFFFFFFFFFFFFFFFFFFFFFFFFFFFFFFFFFFFFFFFFFFFFFFFFFFFFFFF

@A00155:342:HHGFNDSXY:1:1611:6705:19460 2:N:0:GAACCTAG+TCCGCATA  
CTTCATATCTCTCCGGCCACCACTGGTCCATATCGATACTCACGTGTCCGTCAGAGTATGTTCCCAGC  
TCACCTTTCAGCGATCCCTCATTAGATTCTTGCATCTTCATCAGCATGCAAAATCTTAACATATTAA

+

FFFFFFFFFFFF:FF:FFFFFFFFFFFFFFFFFFFFFFFFFFFFFFFFFFFFFFFFFFFFFFFFFFFFFFFFFFFFFFFF  
FFFFFFFFFF:FF:FFFFFFFF:FFFFFFFFFFFFFFFF:FFFFFFFFFF:FFFF:FFFFFFFFFFFFFFFFFFFF::

@A00155:342:HHGFNDSXY:1:1611:6424:19664 2:N:0:GAACCTAG+TCCGCATA  
CTTCATATCTCTCCGGCCACCACTGGTCCATATCGATACTCACGTGTCCGTCAGAGTATGTTCCCAGC  
TCACCTTTCAGCGATCCCTCATTAGATTCTTGCATCTTCATCAGCATGCAAAATCTTAACATATTAA

+

FFFFFFFFFFFFFFFFFFFF:FFFFFFFFFFFF:FFFFFFFFFFFFFFFFFFFF:FFFFFFF,FFFFFFFFFFFFFFFF  
FFFFFFFFFFFF,FFFFFFFFFFFFFFFFFFFFFFFFFFFFFFFFFFFFFFFFFFFFFFFFFFFFFFFFFFFFFFFF

@A00155:342:HHGFNDSXY:1:1611:6406:19570 2:N:0:GAACCTAG+TCCGCATA  
CTTCATATCTCTCCGGCCACCACTGGTCCATATCGATACTCACGTGTCCGTCAGAGTATGTTCCCAGC  
TCACCTTTCAGCGATCCCTCATTAGATTCTTGCATCTTCATCAGCATGCAAAATCTTAACATATTAA

+

FFFFFFFFFFFFFFFFFFFFFFFFFFFFFFFFFFFFFFFFFFFFFFFFFFFFFFFFFFFFFFFFFFFFFFFFFFFFFFFF  
FFFFFFFFFFFFFFFFFFFFFFFFFFFFFFFFFFFFFFFFFFFFFFFFFFFFFFFFFFFFFFFFFFFFFFFFFFFFFFFF::

@A00155:342:HHGFNDSXY:1:1417:5493:5274 2:N:0:GAACCTAG+TCCGCATA  
TTCATATCTCTCCGGCCACCACTGGTCCATATCGATACTCACGTGTCCGTCAGAGTATGTTCCCAGCT  
CACCTTTCAGCGATCCCTCATTAGATTCTTGCATCTTCATCAGCATGCAAAATCTTAACATATTAA

+

FFFFFFFFFFFFFF,FFFFFFFFFFFF:FFFFFF:FFFFFFFF:FFFFFFFFFFFFFFFFFFFFFFFFFFFFFFFF  
FFFFFFFFFFFFFFFFFFFFFFFF,FF:FFFFFF:FFFFFFFFFFFFFFFFFFFFFFFFFFFFFFFFFFFFFFFF,FFF:FF

@A00155:342:HHGFNDSXY:1:1677:20302:7185 1:N:0:GAACCTAG+TCCGCATA  
TCATATCTCTCCGGCCACCACTGGTCCATATCGATACTCACGTGTCCGTCAGAGTATGTTCCCAGCTC  
ACCTTTCAGCGATCCCTCATTAGATTCTTGCATCTTCATCAGCATGCAAAATCTTAAC

+

FFFFFFFFFFFFFFFFFFFFFFFFFFFFFFFFFFFFFFFFFFFFFFFFFFFFFFFFFFFFFFFFFFFFFFFFFFFFFFFF  
FFFFFFFFFFFFFFFFFFFFFFFFFFFFFFFF,FFFFFFFFFFFFFFFFFFFFFFFFFFFFFFFF:FFFFFFFFFF

@A00155:342:HHGFNDSXY:1:1655:32796:14168 1:N:0:GAACCTAG+TCCGCATA  
TCATATCTCTCCGGCCACCACTGGTCCATATCGATACTCACGTGTCCGTCAGAGTATGTTCCCAGCTC  
ACCTTTTCAGCGATCCCTCATTAGATTCTTGCATCTTCATCAGCATGCAAAATCTTAACATATTA

F

[illegible]

@A00155:342:HHGFNDSXY:1:2271:2275:26412 1:N:0:GAACCTAG+TCCGCATA  
TCATATCTCTCCGGCCACCACTGGTCCATATCGATACTCACGTGTCCGTCAGAGTATGTTCCCAGCTC  
ACCTTTTCAGCGATCCCTCATTAGATTCTTGCATCTTCATCAGCATGCAAAATCTTAACATATTA

F

```

FFFFFFFFFFFFFFFFFFFFFFFF,FFFFFFFFFFFFFFFF:FFFFFF:FFFFF:FFFFFFFFFFFF:FFFF
F:FFFFFFF:FFFFFFFFFFFF:FF,:FFFFFF,:F:FF:FFFFF::FF,FFFFFFFFFFFFFFFF:FFFFF

```

@A00155:342:HHGFNDSXY:1:1659:13386:26115 2:N:0:GAACCTAG+TCCGCATA  
TCATATCTCTCCGGCCACCACTGGTCCATATCGATACTCACGTGTCCGTCAGAGTATGTTCCCAGCTC  
ACCTTTCAGCGATCCCTCATTAGATTCTTGCATCTTCATCAGCATGCAAAATCTTAACATATTA

F

[illegible]

@A00155:342:HHGFNDSXY:1:1611:12563:7185 2:N:0:GAACCTAG+TCCGCATA  
TCATATCTCTCCGGCCACCACTGGTCCATATCGATACTCACGTGTCCGTCAGAGTATGTTCCCAGCTC  
ACCTTTTCAGCGATCCCTCATTAGATTCTTGCATCTTCATCAGCATGCAAAATCTTAACATATTAACAA

F

[illegible]

@A00155:342:HHGFNDSXY:1:1568:4779:13714 2:N:0:GAACCTAG+TCCGCATA  
CATATCTCTCCGGCCACCACTGGTCCATATCGATACTCACGTGTCCGTCAGAGTATGTTCCCAGCTCA  
CCTTTTCAGCGATCCCTCATTAGATTCTTGCATCTTCATCAGCATGCAAAATCTTAACATATTAACAAG

F

```
FFF:FFFFFFFFFFFFFFFFFFFFFFFFFFFFFFFFFFFFFFFFFFFFF,FFFFFFFFFFFFFFFFFFFF:FFFFFFFFFF
FFFFFFFFFFFFFFFFFFFFFFFFFFFFFFFFFFFFFFFFFFFFFFFFF,FFFFFFFFFFFFFFFFFFFFFFFFFFFF:FFF,FFFFFFFFFFFFFFFFFFFF
```

@A00155:342:HHGFNDSXY:1:1568:2871:12446 2:N:0:GAACCTAG+TCCGCATA  
CATATCTCTCCGGCCACCACTGGTCCATATCGATACTCACGTGTCCGTCAGAGTATGTTCCCAGCTCA  
CCTTTTCAGCGATCCCTCATTAGATTCTTGCATCTTCATCAGCATGCAAAATCTTAACATATTAACAAG

F

[illegible]

@A00155:342:HHGFNDSXY:1:2636:29957:28103 2:N:0:GAACCTAG+TCCGCATA  
ATCTCTCCGGCCACCACTGGTCCATATCGATACTCACGTGTCCGTCAGAGTATGTTCCAGCTCACCT  
TTCAGCGATCCCTCATTAGATTCTTGCATCTTCATCAGCATGCAAAATCTTAACATATTAACAAGCAG

F

```

FFFFFFFF:FF:FFF:FF:F::F:F,FFFFFF,FFFFFF,FFFF,FFF:FF,F:FFFF
FFFFFFFFFFFFFFFF:FFF:FFFFFFFF:FFFFFF::FFFF:FFFF:FFFF:FFFFFF:FFFF:FFF

```

@A00155:342:HHGFNDSXY:1:2521:21820:8656 2:N:0:GAACCTAG+TCCGCATA  
ATCTCTCCGGCCACCACTGGTCCATATCGATACTCACGTGTCCGTGAGAGTATGTTCCAGCTCACCT  
TTCAGCGATCCCTCATTAGATTCTTGATCTTCATCAGCATGCAAAATCTTAACATATTAACAAGCAG

F

[illegible]

@A00155:342:HHGFNDSXY:1:1344:22227:14215 1:N:0:GAACCTAG+TCCGCATA  
TCTCTCCGGCCACCACTGGTCCATATCGATACTCACGTGTCCGT CAGAGTATGTTCCCAGCTCACCTT  
TCAGCGATCCCTCATTAGATTCTTGCACTTTCATCAGCATGCAAAATCTTAACATATTAACAAGCAGT

E

[illegible]

@A00155:342:HHGFNDSXY:1:1314:8350:8688 1:N:0:GAACCTAG+TCCGCATA  
CTCTCCGGCCACCACTGGTCCATATCGATACTCACGTGTCCGTCAGAGTATGTTCCAGCTCACCTTT  
CAGCGATCCCTCATTAGATTCTTGCATCTTCATCAGCATGCAAAATCTTAACATATTAAC

+

FFFFFFFFFFFFFFFFFFFFFFFFFFFFFFFFFFFFFFFFFFFFFFFFFFFFFFFFFFFFFFFFFFFFFFFF  
FFFFFFFFFFFFFFFFFFFFFFFFFFFFFFFFFFFFFFFFFFFFFFFFFFFFFFFFFFFFFFFFFFFFFFFF

@A00155:342:HHGFNDSXY:1:1604:26413:10473 1:N:0:GAACCTAG+TCCGCATA  
CTCTCCGGCCACCACTGGTCCATATCGATACTCACGTGTCCGTCAGAGTATGTTCCAGCTCACCTTT  
CAGCGATCCCTCATTAGATTCTTGCATCTTCATCAGCATGCAAAATCTTAACATATTAACAAGCAG

+

FFFFFFFFFFFFFFFFFFFFFFFFFFFFFFFFFFFFFFFFFFFFFFFFFFFFFFFFFFFFFFFFFFFFFFFF  
FFFFFFFFFFFFFFFFFFFFFFFFFFFFFFFF:FFFFFFFF,FFFFFFFFFFFFFFFFFFFFFFFF:FFFFFFF

@A00155:342:HHGFNDSXY:1:2472:12427:12868 2:N:0:GAACCTAG+TCCGCATA  
CTCTCCGGCCACCACTGGTCCATATCGATACTCACGTGTCCGTCAGAGTATGTTCCAGCTCACCTTT  
CAGCGATCCCTCATTAGATTCTTGCATCTTCATCAGCATGCAAAATCTTAACATATTAACAAGCAGTG

+

FFFFFFFFFFFFFFFFFFFFFFFFFFFFFFFFFFFFFFFFFFFFFFFFFFFFFFFFFFFFFFFFFFFFFFFF  
FFFFFFFFFFFFFFFFFFFFFFFFFFFFFFFF:FFFFFFFFFFFFFFFFFFFFFFFFFFFFFFFF,FFFFFFF

@A00155:342:HHGFNDSXY:1:2304:6551:17472 1:N:0:GAACCTAG+TCCGCATA  
CTCTCCGGCCACCACTGGTCCATATCGATACTCACGTGTCCGTCAGAGTATGTTCCAGCTCACCTTT  
CAGCGATCCCTCATTAGATTCTTGCATCTTCATCAGCATGCAAAATCTTAACATATTAACAAGCAGTG

+

FFFFFFFFFFFFFFFFFFFFFFFFFFFFFFFF:FFFF:FFF,FFFF,FFFFFFFFFFFFFFFF:FFFFFFFFFFFF:F  
FFFF:::FFF:FF::FFFF:,F:FFFF,FFF:F,F:,FFFF,:FFFFFF:FFFF:F::FFF,FFFF

@A00155:342:HHGFNDSXY:1:1432:28890:33207 2:N:0:GAACCTAG+TCCGCATA  
CTCTCCGGCCACCACTGGTCCATATCGATACTCACGTGTCCGTCAGAGTATGTTCCAGCTCACCTTT  
CAGCGATCCCTCATTAGATTCTTGCATCTTCATCAGCATGCAAAATCTTAACATATTAACACGCAGTG

+

:FFFFFFFFFFFFFFFFFFFFFFFFFFFFFFFF:FF:F:FF:FFFF:FFFFFFFFFFFFFFFF:FFFF,FFFF  
FFFF:FFF,FFFF:FFF:FF:FFFFFFFF,FF,FFFFFFFFFFFFFFFFFFFFFFFF:FF,FF,,FFFFF

@A00155:342:HHGFNDSXY:1:2174:8648:8578 2:N:0:GAACCTAG+TCCGCATA  
CTCTCCGGCCACCACTGGTCCATATCGATACTCACGTGTCCGTCAGAGTATGTTCCAGCTCACCTTT  
CAGCGATCCCTCATTAGATTCTTGCATCTTCATCAGCATGCAAAATCTTAACATATTAACAAGCAGTG

+

FFFFFFFFFFFFFFFFFFFFFFFFFFFFFFFFFFFFFFFFFFFFFFFFFFFFFFFFFFFFFFFFFFFFFFFF  
FFFFFFFFFFFFFFFFFFFFFFFFFFFFFFFF:FFFFFFFFFFFFFFFFFFFFFFFF:F:FFFFFF::F

@A00155:342:HHGFNDSXY:1:2239:10899:17300 1:N:0:GAACCTAG+TCCGCATA  
CTCTCCGGCCACCACTGGTCCATATCGATACTCACGTGTCCGTCAGAGTATGTTCCAGCTCACCTTT  
CAGCGATCCCTCATTAGATTCTTGCATCTTCATCAGCATGCAAAATCTTAACATATTAACAAGCAGTG

+

FFFFFFFFFFFFFFFFFFFFFFFFFFFFFFFFFFFFFFFFFFFFFFFFFFFFFFFFFFFFFFFFFFFFFFFF  
FFFFF:,FFFFFFFFFFFFFFFFFFFFFFFFFFFFFFFFFFFFFFFF:FFFF:FFFFFFFF

@A00155:342:HHGFNDSXY:1:2153:8983:32456 2:N:0:GAACCTAG+TCCGCATA  
CTCTCCGGCCACCACTGGTCCATATCGATACTCACGTGTCCGTCAGAGTATGTTCCAGCTCACCTTT  
CAGCGATCCCTCATTAGATTCTTGCATCTTCATCAGCATGCAAAATCTTAACATATTAACAAGCAGTG

+

FFFFFFFFFFFFFFFFFFFFFFFFFFFFFFFFFFFFFFFFFFFFFFFFFFFFFFFFFFFFFFFFFFFFFFFF  
FFFFFFFFFFFFFFFFFFFFFFFFFFFFFFFF:FFFFFFFFFFFFFFFF:FFFFFFF

@A00155:342:HHGFNDSXY:1:2224:7464:8907 1:N:0:GAACCTAG+TCCGCATA  
CTCTCCGGCCACCACTGGTCCATATCGATACTCACGTGTCCGTCAGAGTATGTTCCAGCTCACCTTT  
CAGCGATCCCTCATTAGATTCTTGCATCTTCATCAGCATGCAAAATCTTAACATATTAACAAGCAGTG

+

FFFFFFFFFFFFFFFFFFFFFFFFFFFFFFFFFFFFFFFFFFFFFFFFFFFFFFFFFFFFFFFFFFFFFFFF  
FFFFFFFFFFFFFFFFFFFFFFFFFFFFFFFF:F:FF:FFFFF,FFFFFFF:

[illegible]

[illegible]



@A00155:342:HHGFNDSXY:1:1211:21160:25081 2:N:0:GAACCTAG+TCCGCATA  
CTCCGGCCACCACTGGTCCATATCGATACTCACGTGTCCGTCAGAGTATGTTCCCAGCTCACCTTTCA  
GCGATCCCTCATTAGATTCTTGCATCTTCATCAGCATGCAAAATCTTAACATATTAACAAGCAG

 $+$ [illegible]

@A00155:342:HHGFNDSXY:1:2451:29288:1642 2:N:0:GAACCTAG+TCCGCATA  
CTCCGGCCACCACTGGTCCATATCGATACTCACGTGTCCGTCAGAGTATGTTCCCAGCTCACCTTTCA  
GCGATCCCTCATTAGATTCTTGCATCTTCATCAGCATGCAAAATCTTAACATATTAACAAGCAG

+

[illegible]

@A00155:342:HHGFNDSXY:1:2661:32072:12759 2:N:0:GAACCTAG+TCCGCATA  
CTCCGGCCACCACTGGTCCATATCGATACTCACGTGTCCGTCAGAGTATGTTCCCAGCTCACCTTTCA  
GCGATCCCTCATTAGATTCTTGCATCTTCATCAGCATGCAAAATCTTAACATATTAACAAGCAG

+

```
FFFFFFFFFFFFFFFFFFFFFF:F,FFFFFFFFFFFFFFFFFFFFFFFFFFFFFFFFFFFF:FFFFFFFFFFFFFFFFFFFFFF:  
FFFFFFFFFFFFFFFFFFFFFFFFFFFFFFFFFFFF:FFFFFFFFFFFFFFFFFFFFFFFFFFFFFFFFFFFFF,F:FFFFF
```

@A00155:342:HHGFNDSXY:1:2255:12445:33724 2:N:0:GAACCTAG+TCCGCATA  
CTCCGGCCACCACTGGTCCATATCGATACTCACGTGTCCGTCAGAGTATGTTCCAGCTCACCTTTCA  
GCGATCCCTCATTAGATTCTTGCATCTTCATCAGCATGCAAAATCTTAACATATTAACAAGCAG

+

[illegible]

@A00155:342:HHGFNDSXY:1:1470:18475:2550 2:N:0:GAACCTAG+TCCGCATA  
CTCCGGCCACCACTGGTCCATATCGATACTCACGTGTCCGTCAGAGTATGTTCCCAGCTCACCTTTCA  
GCGATCCCTCATTAGATTCTTGCATCTTCATCAGCATGCAAAATCTTAACATATTAACAAGCAG

+

```

FFFFFFFFFFFFFFFF:FFFFFFFFFFFFFFFF,FFFFFF:FFFFFFFFFFFFFFFFFFFFFFFFFFFFFFFF
FFFFFFFFFFFFFFFF.FFFFFFFFF:FFFFFFFFFFFFFFFF:FFFFFFFFFFFFFF

```

@A00155:342:HHGFNDSXY:1:1477:16821:28995 2:N:0:GAACCTAG+TCCGCATA  
CTCCGGCCACCACTGGTCCATATCGATACTCACGTGTCCGTCAGAGTATGTTCCCAGCTCACCTTTCA  
GCGATCCCTCATTAGATTCTTGCATCTTCATCAGCATGCAAAATCTTAACATCTTAACAAGCAG

+

```

FFFFFFFF:FFFFFFFFFFFFFFFFFFFFFFFF:FFFFF:FFFF:,FFFFFFF:FFFFFFFFFFFFFFFFFFFF
FFFFFFFFFFFF.FFF:FFFFFFFFFFFFFFFFFFFFFFFFFFFFFFFF:FFFFFFFFFFFF.F:.FFFFFFFF

```

@A00155:342:HHGFNDSXY:1:2472:11957:3255 2:N:0:GAACCTAG+TCCGCATA  
CTCCGGCCACCACTGGTCCATATCGATACTCACGTGTCCGTCAGAGTATGTTCCCAGCTCACCTTTCA  
GGGATCCCTCATTAGATTCTTGCATCTTCATCAGCATGCAAAATCTTAACATATTAACAAGCAG

+

[illegible]

@A00155:342:HHGFNDSXY:1:1523:31593:14591 1:N:0:GAACCTAG+TCCGCATA  
CTCCGGCCACCACTGGTCCATATCGATACTCACGTGTCCGTCAGAGTATGTTCCCAGCTCACCTTTCA  
GCGATCCCTCATTAGATTCTTGCATCTTCATCAGCATGAAAAATCTTAACATATTAACAAGCAGTGAG

+

[illegible]

@A00155:342:HHGFNDSXY:1:2513:26078:6136 1:N:0:GAACCTAG+TCCGCATA  
CTCCGGCCACCACTGGTCCATATCGATACTCACGTGTCCGTCAGAGTATGTTCCCAGCTCACCTTTCA  
GCGATCCCTCATTAGATTCTTGCATCTTCATCAGCATGCAAAATCTTAACATATTAACAAGCAGTGAG

+

```

FFFFFFFFFFFFFFFFFFFFFFFFFFFFFFFFFFFFFFFFFFFFFFFFFFFFFFFFFFFFFFFFFFFFFFFFFFFF
EEE. FFFFFFFF.FFFFFFFF.FFFFFFFF.FFFFFFFF.FFFFFFFF.FFFFFFFF.FFFFFFFF.FFFFFFFF

```

@A00155:342:HHGFNDSXY:1:1107:13630:13448 1:N:0:GAACCTAG+TCCGCATA  
CTCCGGCCACCACACTGGTCCATATCGATACTCACGTGTCCGTCAGAGTATGTTCCCAGCTCACCTTTCA  
GCGATCCCTCATTAGATTCTTG CATCTTCATCAGCATGCAAATCTTAACATATTAACAAGCAGTGAG  
+  
FFFFFFFFFFFFFFFFFFFFFFFFFFFFFFFFFFFFFFFFFFFFFFFFFFFFFFFFFFFFFFFFFFFFFFFFFFFFF  
FFF,FFFFFFFFFFFFFFFFFFFFFF,FF:FF:FFFFFFFFFFFFFFFFFFFF:FFF:FFFFFFFFFFFFFFFFFFFF  
@A00155:342:HHGFNDSXY:1:2271:6858:18067 1:N:0:GAACCTAG+TCCGCATA  
CTCCGGCCACCACACTGGTCCATATCGATACTCACGTGTCCGTCAGAGTATGTTCCCAGCTCACCTTTCA  
GCGATCCCTCATTAGATTCTTG CATCTTCATCAGCATGCAAATCTTAACATATTAACAAGCAGTGAG  
+  
FFFFFFFFFFFFFFFFFFFFFFFFFFFFFFFFFFFFFFFFFFFFFFFFFFFFFFFFFFFFFFFFFFFFFFFFFFFFF  
FFF:FFFFFFFFFFFFFFFFFFFFFFFFFFFFFFFFFFFFFFFFFFFFFFFFFFFFFFFFFFFFFFFFFFFFFFFFFFFFF  
@A00155:342:HHGFNDSXY:1:1239:1823:15107 1:N:0:GAACCTAG+TCCGCATA  
CTCCGGCCACCACACTGGTCCATATCGATACTCACGTGTCCGTCAGAGTATGTTCCCAGCTCACCTTTCA  
GCGATCCCTCATTAGATTCTTG CATCTTCATCAGCATGCAAATCTTAACATATTAACAAGCAGTGAG  
+  
FFFFFFFFFFFFFFFFFFFFFFFFFFFFFFFFFFFFFFFFFFFFFFFFFFFFFFFFFFFFFFFFFFFFFFFFFFFFF  
FFF:FFFFFFFFFFFFFFFFFFFFFFFFFFFFFFFFFFFFFFFFFFFFFFFFFFFFFFFFFFFFFFFFFFFFFFFFFFFFF  
@A00155:342:HHGFNDSXY:1:1239:1533:11537 1:N:0:GAACCTAG+TCCGCATA  
CTCCGGCCACCACACTGGTCCATATCGATACTCACGTGTCCGTCAGAGTATGTTCCCAGCTCACCTTTCA  
GCGATCCCTCATTAGATTCTTG CATCTTCATCAGCATGCAAATCTTAACATATTAACAAGCAGTGAG  
+  
FFFFFFFFFFFFFFFFFFFFFFFFFFFFFFFFFFFFFFFFFFFFFFFFFFFFFFFFFFFFFFFFFFFFFFFFFFFFF  
F:F::FFFFFFFFFFFFFFFFFFFFFFFFFFFFFFFFFFFFFFFFFFFFFFFFFFFFFFFFFFFFFFFFFFFFFFFFFFFFF  
@A00155:342:HHGFNDSXY:1:1110:10230:30389 1:N:0:GAACCTAG+TCCGCATA  
CTCCGGCCACCACACTGGTCCATATCGATACTCACGTGTCCGTCAGAGTATGTTCCCAGCTCACCTTTCA  
GCGATCCCTCATTAGATTCTTG CATCTTCATCAGCATGCAAATCTTAACATATTAACAAGCAGTGAG  
+  
FFFFFFFFFFFFFFFFFFFFFFFFFFFFFFFFFFFFFFFFFFFFFFFFFFFFFFFFFFFFFFFFFFFFFFFFFFFFF  
FFF,,FFF:FFFFFFFFFFFFFFFFFFFFFFFFFFFFFFFFFFFFFFFFFFFFFFFFFFFFFFFFFFFFFFFFFFFFFFFFFFFFF  
@A00155:342:HHGFNDSXY:1:2661:32072:12759 1:N:0:GAACCTAG+TCCGCATA  
CTCCGGCCACCACACTGGTCCATATCGATACTCACGTGTCCGTCAGAGTATGTTCCCAGCTCACCTTTCA  
GCGATCCCTCATTAGATTCTTG CATCTTCATCAGCATGCAAATCTTAACATATTAACAAGCAGTGAG  
+  
FFFFFFFFFFFFFFFFFFFFFFFFFFFFFFFFFFFFFFFFFFFFFFFFFFFFFFFFFFFFFFFFFFFFFFFFFFFFF  
FFF:FFFFFFFFFFFFFFFFFFFFFFFFFFFFFFFFFFFFFFFFFFFFFFFFFFFFFFFFFFFFFFFFFFFFFFFFFFFFF  
@A00155:342:HHGFNDSXY:1:1630:12933:24017 1:N:0:GAACCTAG+TCCGCATA  
CTCCGGCCACCACACTGGTCCATATCGATACTCACGTGTCCGTCAGAGTATGTTCCCAGCTCACCTTTCA  
GCGATCCCTCATTAGATTCTTG CATCTTCATCAGCATGCAAATCTTAACATATTAACAAGCAGTGAG  
+  
FFFFFFFFFFFFFFFFFFFFFFFFFFFFFFFFFFFFFFFFFFFFFFFFFFFFFFFFFFFFFFFFFFFFFFFFFFFFF  
FFF:FFFFFFFFFFFFFFFFFFFFFFFFFFFFFFFFFFFFFFFFFFFFFFFFFFFFFFFFFFFFFFFFFFFFFFFFFFFFF  
@A00155:342:HHGFNDSXY:1:2437:31367:13698 1:N:0:GAACCTAG+TCCGCATA  
CTCCGGCCACCACAGGTCCATATCGATACTCACGTGTCCGTCAGAGTATGTTCCCAGCTCACCTTTCA  
GCGATCCCTCATTAGATTCTTG CATCTTCATCAGCATGCAAATCTTAACATATTAACAAGCAGTGAG  
+  
FFFFFFFFFFFFFFFFFFFFFFFFFFFFFFFFFFFFFFFFFFFFFFFFFFFFFFFFFFFFFFFFFFFFFFFFFFFFF  
FFF:,FFFFFFFFFFFFFFFFFFFFFFFFFFFFFFFFFFFFFFFFFFFFFFFFFFFFFFFFFFFFFFFFFFFFFFFFFFFFF  
@A00155:342:HHGFNDSXY:1:1315:9579:5744 1:N:0:GAACCTAG+TCCGCATA  
CTCCGGCCACCACACTGGTCCATATCGATACTCACGTGTCCGTCAGAGTATGTTCCCAGCTCACCTTTCA  
GCGATCCCTCATTAGATTCTTG CATCTTCATCAGCATGCAAATCTTAACATATTAACAAGCAGTGAG  
+

[illegible]

[illegible]

@A00155:342:HHGFNDSXY:1:1313:15619:17362 2:N:0:GAACCTAG+TCCGCATA  
CACTGGTCCATATCGATACTCACGTGTCCGTCAGAGTATGTTCCCAGCTCACCTTTTCAGCGATCCCTC  
ATTAGATTCTTGCATCTTCATCAGCATGCAAAATCTTAACATATTAACAAGCAGTGAGACATGGTTA  
+  
FFFFFFFF:FF,FFFFFFFF:FFFFFFFFFFFFFFFFFFFFFFFF,FFFF:FFFFFFFFFFFFFFFFFFFFFFFF:FFFF  
FFFFFFFF:FFFFFFFFFFFFFFFFFFFFFFFF:FFFF:FFFFFFFF:FFF,FF,,FF,FFFFFFFF:,FFFFFFFF  
@A00155:342:HHGFNDSXY:1:2406:23439:23672 2:N:0:GAACCTAG+TCCGCATA  
CACTGGTCCATATCGATACTCACGTGTCCGTCAGAGTATGTTCCCAGCTCACCTTTTCAGCGATCCCTC  
ATTAGATTCTTGCATCTTCATCAGCATGCAAAATCTTAACATATTAACAAGCAGTGAGACATGGTTAT  
+  
FFFFFFFFFFFFFFFFFFFFFFFFFFFFFFFF:FFFFFFFF:FFFFFFFFFFFFFFFF:F:F:FFFFFFFFFFFFFFFF  
FFFFFFFFFFFFFFFF:FFFFFFFFFFFFFFFFFFFFFFFF:FFFFFFFF:FFF,FF:FFFFFFFFFFFFFFFF  
@A00155:342:HHGFNDSXY:1:2617:22426:27461 2:N:0:GAACCTAG+TCCGCATA  
GGTCCATATCGATACTCACGTGTCCGTCAGAGTATGTTCCCAGCTCACCTTTTCAGCGATCCCTCATTA  
GATTCTTGCATCTTCATCAGCATGCAAAATCTTAACATATTAACAAGCAGTGAGACATGGTTATCTGA  
+  
FFFFFFFFFFFFFFFF:FFFFFFFFFFFFFFFFFFFFFFFFFFFFFFFFFFFFFFFFFFFFFFFFFFFFFFFFFFFFF:F  
FFFFFFFFFFFFFFFFFFFFFFFFFFFFFFFFFFFFFFFFFFFFFFFF:FFF,:FFFFFFFFFFFFFFFFFFFFFFFF  
@A00155:342:HHGFNDSXY:1:1268:29939:18834 1:N:0:GAACCTAG+TCCGCATA  
GTCCATATCGATACTCACGTGTCCGTCAGAGTATGTTCCCAGCTCACCTTTTCAGCGATCCCTCATTAG  
ATTCTTGCATCTTCATCAGCATGCAAAATCTTAACATATTAACAAGCAGTGAGACATG  
+  
FFFFFFFFFFFFFFFFFFFFFFFFFFFFFFFFFFFFFFFFFFFFFFFFFFFFFFFFFFFFFFFF:FFFFFFFF:FFFFF,FFFF:FFFFF  
FFFFFFFF,F:FFF::F,FFFFFFFF:FFFFFFFF,FFFFFFFFFFFFFFFFFFFFFFFF:FF  
@A00155:342:HHGFNDSXY:1:1437:5358:24236 1:N:0:GAACCTAG+TCCGCATA  
GTCCATATCGATACTCACGTGTCCGTCAGAGTATGTTCCCAGCTCACCTTTTCAGCGATCCCTCATTAG  
ATTCTTGCATCTTCATCAGCATGCAAAATCTTAACATATTAACAAGCAGTGAGACATGGTTATCTGAC  
+  
FFFFFFFFFFFFFFFFFFFFFFFFFFFFFFFFFFFFFFFFFFFFFFFFFFFFFFFFFFFFFFFF:FFFFFFFF:FFFFFFFF  
FFFFFFFF:FFFFFFFF:FFFFFFFF:FFFFFFFF:FFFFFFFF:FFFFFFFF:FFFFFFFF:FFFFFFFF  
@A00155:342:HHGFNDSXY:1:2377:29261:20259 1:N:0:GAACCTAG+TCCGCATA  
GTCCATATCGATACTCACGTGTCCGTCAGAGTATGTTCCCAGCTCACCTTTTCAGCGATCCCTCATTAG  
ATTCTTGCATCTTCATCAGCATGCAAAATCTTAACATATTAACAAGCAGTGAGACATGGTTATCTGAC  
+  
FFFF:FFFFFFFFFFFFFFFFFFFFFFFFFFFFFFFF:FF,FFFFFFFFFFFFFFFFFFFFFFFF:FFFFFFFF  
FFFFFFFF,FF:FFFFFFFF:FFFFFFFFFFFFFFFFFFFFFFFFFFFFFFFF:FFFFFFFF  
@A00155:342:HHGFNDSXY:1:1568:11858:8437 1:N:0:GAACCTAG+TCCGCATA  
CCATATCGATACTCACGTGTCCGTCAGAGTATGTTCCCAGCTCACCTTTTCAGCGATCCCTCATTAGAT  
TCTTGCATCTTCATCAGCATGCAAAATCTTAACATATTAACAAGCAGTGAGACATGGTTATCTGAC  
+  
FFFFFFFFFFFFFFFFFFFFFFFFFFFFFFFFFFFFFFFFFFFFFFFFFFFFFFFFFFFFFFFF,FFFFFFFF  
FFFFFFFF:FFFF,FF:FFFFFFFFFFFFFFFF:FFFFFFFFFFFFFFFF:FFFFFFFFFFFFFFFF  
@A00155:342:HHGFNDSXY:1:2577:8793:23891 1:N:0:GAACCTAG+TCCGCATA  
CCATATCGATACTCACGTGTCCGTCAGAGTATGTTCCCAGCTCACCTTTTCAGCGATCCCTCATTAGAT  
TCTTGCATCTTCATCAGCATGCAAAATCTTAACATATTAACAAGCAGTGAGACATGGTTATCTGACCA  
+  
FFFFFFFFFFFFFFFFFFFFFFFFFFFFFFFFFFFFFFFFFFFFFFFFFFFFFFFFFFFFFFFF  
FFFFF,FFFFFFFF:FFFFFFFF:FFFFFFFFFFFFFFFFFFFFFFFFFFFFFFFF  
@A00155:342:HHGFNDSXY:1:1278:29984:27774 1:N:0:GAACCTAG+TCCGCATA  
CCATATCGATACTCACGTGTCCGTCAGAGTATGTTCCCAGCTCACCTTTTCAGCGATCCCTCATTAGAT  
TCTTGCATCTTCATCAGCATGCAAAATCTTAACATATTAACAAGCAGTGAGACATGGTTATCTGACCA  
+  
FFFFFFFFFFFFFFFFFFFFFFFFFFFFFFFF:FFFFFFFF, :FFFFFF,FFFFFFFF  
FFFFF::FFFFFF:FFFFFFFF:F:FFFFFFFF,FFFFFFFFFFFFFFFF

@A00155:342:HHGFNDSXY:1:2178:24243:19711 2:N:0:GAACCTAG+TCCGCATA  
 CCATATCGATACTCACGTGTCCGTCAGAGTATGTTCCCAGCTCACCTTTTCAGCGATCCCTCATTAGAT  
 TCTTGCATCTTCATCAGCATGCAAAATCTTAACATATTAACAAGCAGTGAGACATGGTTATCTGACCA  
 +  
 FFFF,FFFF,FFFFFFFFFFFFFFFFFFFFFFFFFFFFFFFF,FFFFFFFFFFFFFFFFFFFF,FFFFFFFFFFFFFFFFFFFF  
 FFFFFFFFFF:FFFFFFFFF:FFF:FFFFFFFFFFFF,FFF,F,,FFFFFFFFFFFFFFFFFFFFFFFFFFFF  
 @A00155:342:HHGFNDSXY:1:2437:31367:13698 2:N:0:GAACCTAG+TCCGCATA  
 CATATCGATACTCACGTGTCCGTCAGAGTATGTTCCCAGCTCACCTTTTCAGCGATCCCTCATTAGATT  
 CTTGCATCTTCATCAGCATGCAAAATCTTAACATATTAACAAGCAGTGAGACATGGTTATCTGACCAT  
 +  
 FF:FFFF:FFFF,FF:FFFFFFFFFFFFFFFFF:,FFFF:FFFFFFFFFFFFFFFFFFFFFFFFFFFF,FFFF  
 FFFFFFFFFF:FFFFFFFFFFFFFFFFFFFFFFFFFFFF:FFF:F:FFFFFFFF:FFFFFFFFFFFFFFFFFFFF:FFFF  
 @A00155:342:HHGFNDSXY:1:1242:8458:29543 1:N:0:GAACCTAG+TCCGCATA  
 TATCGATACTCACGTGTCCGTCAGAGTATGTTCCCAGCTCACCTTTTCAGCGATCCCTCATTAGATTCT  
 TGCATCTTCATCAGCATGCAAAATCTTAACATATTAACAAGCAGTGAGACATGGTTATCT  
 +  
 FFFFFFFFFFFFFFFFFFFFFFFFFFFFFFFFFF:FFFFFFFFFFFFFFFFFFFFFFFFFFFF,F,FFFFFFFFFFFFFFFFFFFF  
 FFF,F:FFFFFFFFFFFFFFFFFFFFFFFFFFFFFFFFFFFFFFFF:FFFFFFFFFFFFFFFFF:FFFFFFF  
 @A00155:342:HHGFNDSXY:1:1549:21721:7420 2:N:0:GAACCTAG+TCCGCATA  
 TATCGATACTCACGTGTCCGTCAGAGTATGGTCCCAGCTCACCTTTTCAGCGATCCCTCATTAGATTCT  
 TGCATCTTCATCAGCATGCAAAATCTTAACATATTAACAAGCAGTGAGACATGGTTATCTGACCATGA  
 +  
 FF:FFFF:FFF:FFFF:FFFFFFFFF:FFF,FFFFFFFFFFFFFFFFFFFFFFFFFFFFFFFFFFFFFFFF:FFFF  
 FFFFFFFFF:FFFFFFFFFFFFFFFFFFFF:FFFFFFFFFFFF:FFF,FFFFFFFFFFFFFFFFF:FFFFFFFFFFFFF  
 @A00155:342:HHGFNDSXY:1:2250:28357:25833 2:N:0:GAACCTAG+TCCGCATA  
 TATCGATACTCACGTGTCCGTCAGAGTATGTTCCCAGCTCACCTTTTCAGCGATCCCTCATTAGATTCT  
 TGCATCTTCATCAGCATGCAAAATCTTAACATATTAACAAGCAGTGAGACATGGTTATCTGACCATGA  
 +  
 FFFFFF:FFFFFFFFFFFFFFFFFFFFFFFFFFFF,FFFFFFFFFFFFFFFFFFFFFFFFFFFFFFFFFFFFFFFF:FF:  
 FFFFFF,FFFFFFFFFFFFFFFFFFFFFFFFFFFFFFFFFFFFFFFF:FF:FFFFFFFFFFFFFFFFFFFFFFFFFFFF  
 @A00155:342:HHGFNDSXY:1:1211:12527:27007 2:N:0:GAACCTAG+TCCGCATA  
 ATCGATACTCACGTGTCCGTCAGAGTATGTTCCCAGCTCACCTTTTCAGCGATCCCTCATTAGATTCTT  
 GCATCTTCATCAGCATGCAAAATCTTAACATATTAACAAGCAGTGAGACATGGTTATCTGACCATGAC  
 +  
 FFFFFFFFFFFFFFFFFFFFFFFFFFFFFFFFFF:FFFFFFFFFFFFFFFFFFFFFFFFFFFFFFFFFFFFFFFFFFFFF  
 FFFFFFFFFFFFFFFFFFFFFFFFFFFFFFFFFF:FFFFFFFFFFFFFFFFFFFFFFFFFFFFFFFFFFFFFFFFFFFFF  
 @A00155:342:HHGFNDSXY:1:2123:20066:16861 2:N:0:GAACCTAG+TCCGCATA  
 ATCGATACTCACGTGTCCGTCAGAGTATGTTCCCAGCTCACCTTTTCAGCGATCCCTCATTAGATTCTT  
 GCATCTTCATCAGCATGCAAAATCTTAACATATTAACAAGCAGTGAGACATGGTTATCTGACCATGAC  
 +  
 FFFFFFFFFFFFFFFF:FFFFFFFFFFFFFFFFFFFFF:FFFFFFFFFFFFFFFFF:FFFFFFFFFFFF:FFFFFFFFF  
 FFFFFFFFFFFFFFFFFFFFFFFFFFFFF:F:FF:FFFFFFFFFFFFFFFFFFFFFFFFFFFFFFFFFFFFFFFFFFFFF  
 @A00155:342:HHGFNDSXY:1:1407:26865:25942 1:N:0:GAACCTAG+TCCGCATA  
 ATCGATACTCACGTGTCCGTCAGAGTATGTTCCCAGCTCACCTTTTCAGCGATCCCTCATTAGATTCTT  
 GCATCTTCATCAGCATGCAAAATCTTAACATATTAACAAGCAGTGAGACATGGTTATCTGACCATGAC  
 +  
 FFFFFFFFFFFFFFFFFFFFFFFFFFFFFFFFFF:FFFFFFFFFFFFFFFFFFFFFFFFFFFFFFFFFFFFFFFFFFFFF  
 FFFFFFFFFFFFF:FFFFFFF:FF,FFFFFFFFFFFFFFFFFFFFFFFFFFFFFFFFFFFFFFFFFFFFFFFFFFFFF  
 @A00155:342:HHGFNDSXY:1:1278:29984:27774 2:N:0:GAACCTAG+TCCGCATA  
 ATCGATACTCACGTGTCCGTCAGAGTATGTTCCCAGCTCACCTTTTCAGCGATCCCTCATTAGATTCTT  
 GCATCTTCATCAGCATGCAAAATCTTAACATATTAACAAGCAGTGAGACATGGTTATCTGACCATGAC  
 +  
 FF:FFFFFFFFFFFFFFFFFFFFFFFFFFFFFFFFFFFFFFFFFFFFFFFFFFFFF:FFFFFFFFFFFFFFFFFFFFFFFFF  
 FFFFFFFFFFFFFFFFFFFFFFFFFFFFFFFFFF:FFFFFFFFFFFF:FF:FFFFFFFFFFFFFFFFFFFFFFFFFFFF

@A00155:342:HHGFNDSXY:1:1315:2935:19570 2:N:0:GAACCTAG+TCCGCATA  
ATCGATACTCACGTGTCCGTCAGAGTATGTTCCCAGCTCACCTTTCAGCGATCCCTCATTAGATTCTT  
GCATCTTCATCAGCATGCAAAATCTTAACATATTAACAAGCAGTGAGACATGGTTATCTGACCATGACC  
+  
FFFFFFFFFFFFFFFFFFFFFFFFFFFFFFFFFFFFFFFFFFFFFFFFFFFFFFFFFFFFFFFFFFFFFFFFFFFFFFFF  
FFFFFFFFFFFFFFFFFFFFFFFFFFFFFFFFFFFFFFFFFFFFFFFFFFFFFFFFFFFFFFFFFFFFFFFFFFFFFFFF  
@A00155:342:HHGFNDSXY:1:2577:8793:23891 2:N:0:GAACCTAG+TCCGCATA  
TCGATACTCACGTGTCCGTCAGAGTATGTTCCCAGCTCACCTTTCAGCGATCCCTCATTAGATTCTTG  
CATCTTCATCAGCATGCAAAATCTTAACATATTAACAAGCAGTGAGACATGGTTATCTGACCATGACC  
+  
FFFFFFFFFFFFFFFFFFFFFFFFFFFFFFFFFFFFFFFFFFFFFFFFFFFFFFFFFFFFFFFFFFFFFFFFFFFFFFFF  
FF:FFFFFFFFFFFFFFFFFFFFFFFFFFFFFFFFFFFFFFFFFFFFFFFFFFFFFFFFFFFFFFFFFFFFFFFFFFFF  
@A00155:342:HHGFNDSXY:1:2436:16233:17112 1:N:0:GAACCTAG+TCCGCATA  
TCGATACTCACGTGTCCGTCAGAGTATGTTCCCAGCTCACCTTTCAGCGATCCCTCATTAGATTCTTG  
CATCTTCATCAGCATGCAAAATCTTAACATATTAACAAGCAGTGAGACATGGTTATCTGACCATGACC  
+  
FFFFFFFFFFFFFFFFFFFFFFFFFFFFFFFFFFFFFFFFFFFFFFFFFFFFFFFFFFFFFFFFFFFFFFFFFFFFFFFF  
F,F:FFFF:FFFFFFFFFFFFFFFFFFFFFFFFFFFFFFFFFFFFFFFFFFFFFFFFFFFFFFFFFFFFFFFFFFFF  
@A00155:342:HHGFNDSXY:1:2513:26078:6136 2:N:0:GAACCTAG+TCCGCATA  
TCGATACTCACGTGTCCGTCAGAGTATGTTCCCAGCTCACCTTTCAGCGATCCCTCATTAGATTCTTG  
CATCTTCATCAGCATGCAAAATCTTAACATATTAACAAGCAGTGAGACATGGTTATCTGACCATGACC  
+  
FFF,,FFFFFFFFFFFFFFFFFFFFFFFFFFFFFFFFFFFFFFFFFFFFFFFFFFFFFFFFFFFFFFFFFFFFFFFF  
FFFF:FFFFFFFFFFFFFFFFFFFFFFFFFFFFFFFFFFFFFFFFFFFFFFFFFFFFFFFFFFFFFFFFFFFFFFFF  
@A00155:342:HHGFNDSXY:1:2677:19768:20823 2:N:0:GAACCTAG+TCCGCATA  
TCGATACTCACGTGTCCGTCAGAGTATGTTCCCAGCTCACCTTTCAGCGATCCCTCATTAGATTCTTG  
CATCTTCATCAGCATGCAAAATCTTAACATATTAACAAGCAGTGAGACATGGTTATCTGACCATGACC  
+  
F:FFFF:FFFFFFFFFFFFFFFFFFFFFFFFFFFFFFFFFFFFFFFFFFFFFFFFFFFFFFFFFFFFFFFFFFFF  
FF:FFFFFFFFFFFFFFFFFFFFFFFFFFFFFFFFFFFFFFFFFFFFFFFFFFFFFFFFFFFFFFFFFFFFFFFF  
@A00155:342:HHGFNDSXY:1:2618:6189:16564 1:N:0:GAACCTAG+TCCGCATA  
GATACTCACGTGTCCGTCAGAGTATGTTCCCAGCTCACCTTTCAGCGATCCCTCATTAGATTCTTGCA  
TCTTCATCAGCATGCAAAATCTTAACATATTAACAAGCAGTGAGACATGGTTATCTGACCATGACCAC  
+  
FFFFFFFFFF:FFFFFFFFFFFFFFFFFFFFFFFFFFFFFFFFFFFFFFFFFFFFFFFFFFFFFFFFFFFFFFFFFFFF  
FFFFFFFFFFFFFFFFFFFFFFFFFFFFFFFFFFFFFFFFFFFFFFFFFFFFFFFFFFFFFFFFFFFFFFFFFFFF  
@A00155:342:HHGFNDSXY:1:1635:12400:11099 2:N:0:GAACCTAG+TCCGCATA  
ATACTCACGTGTCCGTCAGAGTATGTTCCCAGCTCACCTTTCAGCGATCCCTCATTAGATTCTTG  
CTTCATCAGCATGCAAAATCTTAACATATTAACAAGCAGTGAGACATGGTTATCTGACCATGACCA  
+  
FFFF,FFFFFFFFFFFFFFFFFFFFFFFFFFFFFFFFFFFFFFFFFFFFFFFFFFFFFFFFFFFFFFFFFFFFFFFF  
FFFFFFFFFFFFFFFFFFFFFFFFFFFFFFFFFFFFFFFFFFFFFFFFFFFFFFFFFFFFFFFFFFFFFFFFFFFF  
@A00155:342:HHGFNDSXY:1:1366:7175:30890 1:N:0:GAACCTAG+TCCGCATA  
ATACTCACGTGTCCGTCAGAGTATGTTCCCAGCTCACCTTTCAGCGATCCCTCATTAGATTCTTG  
CTTCATCAGCATGCAAAATCTTAACATATTAACAAGCAGTGAGACATGGTTATCTGACCATGACCAC  
+  
FFFFFFFFFFFFFFFFFFFFFFFFFFFFFFFFFFFFFFFFFFFFFFFFFFFFFFFFFFFFFFFFFFFFFFFFFFFF  
FFFFFFFFFFFFFFFFFFFFFFFFFFFFFFFFFFFFFFFFFFFFFFFFFFFFFFFFFFFFFFFFFFFFFFFFFFFF  
@A00155:342:HHGFNDSXY:1:1337:30110:32158 2:N:0:GAACCTAG+TCCGCATA  
ATACTCACGTGTCCGTCAGAGTATGTTCCCAGCTCACCTTTCAGCGATCCCTCATTAGATTCTTG  
CTTCATCAGCATGCAAAATCTTAACATATTAACAAGCAGTGAGACATGGTTATCTGACCATGACCACC  
+  
FFFFFFFFFFFFFFFFFFFF:FFFFFFFFFF:FFFFFFFFFFFFFFFFFFFFFFFFFFFFFFFFFFFFFFFFFFFF  
FFFFFFFFFFFFFFFFFFFFFFFFFFFFFFFFFFFFFFFFFFFFFFFFFFFFFFFFFFFFFFFFFFFFFFFFFFFF  
@A00155:342:HHGFNDSXY:1:1337:30110:32158 2:N:0:GAACCTAG+TCCGCATA  
ATACTCACGTGTCCGTCAGAGTATGTTCCCAGCTCACCTTTCAGCGATCCCTCATTAGATTCTTG  
CTTCATCAGCATGCAAAATCTTAACATATTAACAAGCAGTGAGACATGGTTATCTGACCATGACCACC  
+  
FFFFFFFFFFFFFFFFFFFF:FFFFFFFFFF:FFFF:FFFFFFFFFF,FFFFFFFFFFFFFFFFFFFF:FFFFF:FFFFF  
FFFFFFFFFFFFFFFFFFFFFFFFFFFFFFFFFFFFFFFFFFFFFFFFFFFFFFFFFFFFFFFFFFFFFFFFFFFF  
F,FFFF,FFFFFFFFFF,FFFFF:FFFF,FFFFF:FFFFF

[illegible]



```
@A00155:342:HHGFNDSXY:1:2264:11496:31015 2:N:0:GAACCTAG+TCCGCATA
ACGTGTCCGTCAGAGTATGTTCCCAGCTCACCTTTCAGCGATCCCTCATTAGATTCTTGCATCTTCAT
CAGCCTGCAAAATCTTAACATATTAACAAGCAGTGAGACATGGTTATCTGACCATGACCACCTCTGCA
+
FFFFFFFFFFFFFFFFFFFFFFFFFFFFFFFFFFFFFFFFFFFFFFFFFFFFFFFFFFFFFFFFFFFFFFFF:FFFFFFFFFFFFFFFFFFFFFFFF
FFFF,FFFFFFFFFFFFFFFFFFFFFFFFFFFFFFFFFFFFFFFFFFFFFFFFFFFFFFFFFFFFFFFFFFFFFFFF:FFFFF
@A00155:342:HHGFNDSXY:1:2207:19678:15029 2:N:0:GAACCTAG+TCCGCATA
ACGTGTCCGTCAGAGTATGTTCCCAGCTCACCTTTCAGCGATCCCTCATTAGATTCTTGCATCTTCAT
CAGCATGCAAAATCTTAACATATTAACAAGCAGTGAGACATGGTTATCTGACCATGACCACCTCTGCA
+
FFFFFFFFFFFFFFFFFFFFFFFFFFFFFFFFFFFFFFFFFFFFFFFFFFFFFFFFFFFFFFFFFFFFFFFFFFFFFFFFFFFFFFFFFFFFFFFF
FFFFFFFFFFFFFFFFFFFFFFFFFFFFFFFFFFFFFFFFFFFFFFFFFFFFFFFFFFFFFFFFFFFFFFFFFFFFFFFFFFFFFFFFFFFFFFFF
@A00155:342:HHGFNDSXY:1:2520:30544:34444 1:N:0:GAACCTAG+TCCGCATA
ACGTGTCCGTCAGAGTATGTTCCCAGCTCACCTTTCAGCGATCCCTCATTAGATTCTTGCATCTTCAT
CAGCATGCAAAATCTTAACATATTAACAAGCAGTGAGACATGGTTATCTGACCATGACCACCTCTGCA
+
FFFFFFFFFFFFFFFFFFFFFFFFFFFFFFFFFFFFFFFFFFFFFFFFFFFFFFFFFFFFFFFFFFFFFFFFFFFFFFFFFFFFFFFFFFFFFFFF
FFFFFFFFFFFFFFFFFFFFFFFFFFFFFFFFFFFFFFFFFFFFFFFFFFFFFFFFFFFFFFFFFFFFFFFFFFFFFFFFFFFFFFFFFFFFFFFF
@A00155:342:HHGFNDSXY:1:2530:2320:30906 2:N:0:GAACCTAG+TCCGCATA
CGTGTCCGTCAGAGTATG
+
F:F:FFFFFFFFFFFFFFFF
@A00155:342:HHGFNDSXY:1:2607:25265:8547 1:N:0:GAACCTAG+TCCGCATA
GTGTCCGTCAGAGTATGTTCCCAGCTCACCTTTCAGCGATCCCTCATTAGATTCTTGCATCTTCATCA
GCATGCAAAATCTTAACATATTAACAAGCAGTGAGACATGGTTATCTGACCATGACCACCTCTGCATA
+
FFFFFFFFFFFFFFFFFFFFFFFFFFFFFFFFFFFFFFFFFFFFFFFFFFFFFFFFFFFFFFFFFFFFFFFF:F:FFFF:F,
FFFFFFFFFFFFFFFFFFFFFFFFFFFFFFFFFFFFFFFFFFFFFFFFFFFFFFFFFFFFFFFFFFFFFFFFFFFFFFFFFFFFFFFF
@A00155:342:HHGFNDSXY:1:2607:25201:8437 1:N:0:GAACCTAG+TCCGCATA
GTGTCCGTCAGAGTATGTTCCCAGCTCACCTTTCAGCGATCCCTCATTAGATTCTTGCATCTTCATCA
GCATGCAAAATCTTAACATATTAACAAGCAGTGAGACATGGTTATCTGACCATGACCACCTCTGCATA
+
FFFFFFFFFFFFFFFFFFFFFFFFFFFFFFFFFFFFFFFFFFFFFFFFFFFFFFFFFFFFFFFFFFFFFFFF:FFFFFFFFFFFFFFFF
FFFFFFFFFFFFFFFFFFFFFFFFFFFFFFFFFFFFFFFFFFFFFFFFFFFFFFFFFFFFFFFFFFFFFFFF:FFFFFFFFFFFFFFFF
@A00155:342:HHGFNDSXY:1:2370:12102:18850 2:N:0:GAACCTAG+TCCGCATA
TGTCCGTCAGAGTATGTTCCCAGCTCACCTTTCAGCGATCCCTCATTAGATTCTTGCATCTTCATCAG
CATGCAAAATCTTAACATATTAACAAGCAGTGAGACATGGTTATCTGACCATGACCACCTCTGCATAG
+
:FFFFF:FFFFFFFFFFFFFFFFFFFFFFFFFFFFFFFFFFFFFFFFFFFFFFFFFFFFFFFFFFFFFFFFFFFFFFFF:FFF
FFFFFFFF,FFFFFFFFFFFFFFFFFFFF,FFF:FFFFF,FFF:FFFFF:F:F:FFFFF:FFFFF:FFFFF:FFFFF
@A00155:342:HHGFNDSXY:1:1161:14244:26381 2:N:0:GAACCTAG+TCCGCATA
TGTCCGTCAGAGTATGTTCCCAGCTCACCTTTCAGCGATCCCTCATTAGATTCTTGCATCTTCATCAG
CATGCAAAATCTTAACATATTAACAAGCAGTGAGACATGGTTATCTGACCATGACCACCTCTGCATAG
+
FFF:FFFFF:,FFF,FFFF:FFFFFFFFFFFFFFFFFFFFFFFFFFFFFFFFFFFFFFFFFFFFFFFFFFFFFFFFFFFFFFFF:F
FFFFFFFF:FFFFFFFFF:FFFFF,FFFFFFFFFFFFFFFFFFFF,FFFFFFFFFFFFFFFFFFFFFFFFFFFFFFFF
@A00155:342:HHGFNDSXY:1:1378:24180:16658 1:N:0:GAACCTAG+TCCGCATA
TGTCCGTCAGAGTATGTTCCCAGCTCACCTTTCAGCGATCCCTCATTAGATTCTTGCATCTTCATCAG
CATGCAAAATCTTAACATATTAACAAGCAGTGAGACATGGTTATCTGACCATGACCACCTCTGCATAG
+
FFFFFFFFFFFFFFFFFFFFFFFFFFFFFFFFFFFFFFFFFFFFFFFFFFFFFFFFFFFFFFFFFFFFFFFFFFFFFFFFFFFFFFFF
FFFFFFFFFFFFFFFFFFFFFFFFFFFFFFFFFFFFFFFFFFFFFFFFFFFFFFFFFFFFFFFFFFFFFFFFFFFFFFFFFFFFFFFF
@A00155:342:HHGFNDSXY:1:1315:2935:19570 1:N:0:GAACCTAG+TCCGCATA
TGTCCGTCAGAGTATGTTCCCAGCTCACCTTTCAGCGATCCCTCATTAGATTCTTGCATCTTCATCAG
```

CATGCAAAATCTTAACATATTAACAAGCAGTGAGACATGGTTATCTGACCATGACCACCTCTGCATAG  
+  
FFFFFFFFFFFFFFFFFFFFFFFFFFFFFFFFFFFFFFFF:FFFF:F:FFFFFFFFFFFFFFFFFFFFFFFF: ,FFFF:FFF:F  
FFFFFFFF:FFFFFFFFFFFFFFFFFFFFFFFFFFFFFFFFFFFFFFFFFFFFFFFFFFFFFFFFFFFFFFFFFFFFFFFF  
@A00155:342:HHGFNDSXY:1:2539:29658:1376 1:N:0:GAACCTAG+TCCGCATA  
TGTCCGTCAGAGTATGTTCCCAGCTCACCTTTTCAGCGATCCCTCATTAGATTCTTGCATCTTCATCAG  
CATGCAAAATCTTAACATATTAACAAGCAGTGAGACATGGTTATCTGACCATGACCACCTCTGCATAG  
+  
FFFFFFFFFFFFFFFFFFFFFFFFFFFFFFFFFFFFFFFF:FFFFFFFFFFFF, :FFFFFFFFFFFFFFFFFFFFFFFF:FFFFF:FF:F  
FFFFFFFF:FFFFF:FFFFFFFFFFFFFFFFFFFFFFFFFFFFFFFFFFFFFFFFFFFFFFFFFFFFFFFFFFFFFFFF  
@A00155:342:HHGFNDSXY:1:1107:13630:13448 2:N:0:GAACCTAG+TCCGCATA  
TGTCCGTCAGAGTATGTTCCCAGCTCACCTTTTCAGCGATCCCTCATTAGATTCTTGCATCTTCATCAG  
CATGCAAAATCTTAACATATTAACAAGCAGTGAGACATGGTTATCTGACCATGACCACCTCTGCATAG  
+  
FF,FFFFFFFFFFFFFF:FFFFFFFFFFFFFFFFFFFFFFFFFFFFFFFF:FF::FFFFFFFFFFFFFF:FFFFFFFFF  
FFFFFFFFF, :FFFFFF:FFFFF:FF: :FFFFFFFFFFFFFF:FFFFFFFFFFFFFFFFFFFFFFFFFFFFFFFF  
@A00155:342:HHGFNDSXY:1:2242:7482:19586 2:N:0:GAACCTAG+TCCGCATA  
GTCCGTCAGAGTATGTTCCCAGCTCACCTTTTCAGCGATCCCTCATTAGATTCTTGCATCTTCATCAGC  
ATGCAAAATCTTAACATATTAACAAGCAGTGAGACATGGTTATCTGACCATGACCACCTCTGCATAGC  
+  
FFFFFFFFFFFFFFFFFFFFFF:FFFFFFFFFFFFFFFFFFFFFFFFFFFFFFFFFFFFFFFF:FFFFFFFFFFFFFFFFFFFF  
FFFFFFFFFFFFFFFFFFFF:FFF:FFFFF:FFFF:FFFFFFFFFFFFFFFFFFFFFFFFFFFFFFFFFFFFFFFF:FFFFFFF  
@A00155:342:HHGFNDSXY:1:1410:30454:18380 1:N:0:GAACCTAG+TCCGCATA  
TCCGTCAGAGTATGTTCCCAGCTCACCTTTTCAGCGATCCCTCATTAGATTCTTGCATCTTCATCAGCA  
TGCAAAATCTTAACATATTAACAAGCAGTGAGACATGGTTATCTGACCATGACCACCTCTGCATAGCG  
+  
FFFFFFFFFFFFFFFFFFFFFFFFFFFFFFFFFFFFFFFFFFFFFF:FFFFFFFFFFFFFFFFFFFFFFFFFFFFFFFFFFFF,FFF  
FFFFFFFFFFFFFFFFFFFFFFFFFFFFFFFFFFFFFFFFFFFFFFFFFFFFFFFFFFFFFFFFFFFFFFFFFFFFFFFF  
@A00155:342:HHGFNDSXY:1:2365:21685:14215 1:N:0:GAACCTAG+TCCGCATA  
TCCGTCAGAGTATGTTCCCAGCTCACCTTTTCAGCGATCCCTCATTAGATTCTTGCATCTTCATCAGCA  
TGCAAAATCTTAACATATTAACAAGCAGTGAGACATGGTTATCTGACCATGACCACCTCTGCATAGCG  
+  
FFFFFFFFFFFFFFFFFFFFFFFFFFFFFFFFFFFFFFFFFFFFFF:FFFFFFFFFFFFFFFFFFFFFFFFFFFFFFFFFFFF  
FFFFF:FFFFFFFFF:FFFFFFFFFFFFFFFFFFFFFFFFFFFFFFFFFFFFFFFF:FFFFFFFFFFFFFFFFFFFFF  
@A00155:342:HHGFNDSXY:1:2176:16586:3349 1:N:0:GAACCTAG+TCCGCATA  
CCGTCAGAGTATGTTCCCAGCTCGCCTTTTCAGCGATCCCTCATTAGATTCTTGCATCTTCATCAGCAT  
GCAAAATCTTAACATATTAACAAGCAGTGAGACATGGTTATCTGACCATGACCACCTCTGCATAGCGT  
+  
FFFFFFFFFFFFFFFFFFFFFFFFFFFFFFFFFFFFFFFFFFFFFF:FFFF, , :FFFFFFFFFFFF,FFFFFFFFFFFFFFFFFFFF  
FFFFFFFFFFFFFFFFF:FFFFFFFFFFFFFFFFFFFFFF:FFFFFFFFFFFFFFFFFFFFFFFFFFFFFFFFFFFFF  
@A00155:342:HHGFNDSXY:1:2626:4969:27132 1:N:0:GAACCTAG+TCCGCATA  
CCGTCAGAGTATGTTCCCAGCTCACCTTTTCAGCGATCCCTCATTAGATTCTTGCATCTTCATCAGCAT  
GCAAAATCTTAACATATTAACAAGCAGTGAGACATGGTTATCTGACCATGACCACCTCTGCATAGCGT  
+  
FFFFFFFFFFFF,FFFFFFFFFFFFFFFFFFFFFFFFFFFFFFFF:FFFFFFFFF:FFFFFFFFFFFFFFFFFFFFFFFFF:  
FFFFFFFFF:FFFFFFFFFFFFFFFFFFFFFF:FFFFFFFFFFFFFFFFFFFFFFFFFFFF,FFFFF,FFFFFFFF:FFF:F  
@A00155:342:HHGFNDSXY:1:2331:29423:34162 2:N:0:GAACCTAG+TCCGCATA  
CGTCAGAGTATGTTCCCAGCTCACCTTTTCAGCGATCCCTCATTAGATTCTTGCATCTTCATCAGCATG  
CAAAATCTTAACATATTAACAAGCAGTGAGACATGGTTATCTGACCATGACCACCTCTGCA  
+  
FFFFFFFFFFFFFF:FFFFFFFFFFFFFF,FF:FFFFFFFFFFFFFFFFFFFF:FFF,FFFFFFFFFFFF:FFFFF  
FFF,FFFFFFFFF,F::, :FF,,FF:FFFFFFFFFFFFFFFFFFFFFFFFFFFF:FFFFFFFFFFFFFFF  
@A00155:342:HHGFNDSXY:1:2347:10538:17675 2:N:0:GAACCTAG+TCCGCATA  
CGTCAGAGTATGTTCCCAGCTCACCTTTTCAGCGATCCCTCATTAGATTCTTGCATCTTCATCAGCATG

CAAAATCTTAACATATTAACAAGCAGTGAGACATGGTTATCTGACCATGACCACCTCTGCATA  
+  
,,F:FF:FF,FFFFFF::F,FF,:::FFF:F:FFFF,,FFFFFF:FFF:FF:F:FFFFFFFF:F:, :FF  
:,,, :FFFFFF, :FFF:FFF:F, :FFF:F,, FFFFFFFFFFFFFF:FFF, FFFFFFFFFFFFFFFF  
@A00155:342:HHGFNDSXY:1:2628:3414:12508 2:N:0:GAACCTAG+TCCGCATA  
GTCAGAGTATGTTCCCAGCTCACCTTTAGCGATCCCTCATTAGATTCTTGCATCTTCATCAGCATGC  
AAAATCTTAACATATTAACAAGCAGTGAGACATGGTTATCTGACCATGACCACCTCTGC  
+  
:, FFFFFFFFFFFFFFFFFFFFFFFFFF: FFFFFFFFFFFFFFFFFFFFFFFFFF: FFFFFFFFFFFFFFFFFF  
FFFFFFFFFFFFFFFFFFFFFFFFFFFFFFFF: FFFFFFFFFFFFFFFFFFFFFFFFFF  
@A00155:342:HHGFNDSXY:1:2622:30544:17190 2:N:0:GAACCTAG+TCCGCATA  
GTCAGAGTATGTTCCCAGCTCACCTTTAGCGATCCCTCATTAGATTCTTGCATCTTCATCAGCATGC  
AAAATCTTAACATATTAACAAGCAGTGAGACATGGTTATCTGACCATGACCACCTCTGCA  
+  
FFFFFFFFFFFF: FFFFFFFFFFFFFFFFFFFFFFFFFF, FFFF, FFFFFFFFFFFFFFFFFF: FFFFFF  
FFFFFFFFFFFF: FFFFF, F, :FF: FFFFFFFFFFFFFFFFFFFFFFFFFF  
@A00155:342:HHGFNDSXY:1:1323:15374:32941 2:N:0:GAACCTAG+TCCGCATA  
GTCAGAGTATGTTCCCAGCTCACCTTTAGCGATCCCTCATTAGATTCTTGCATCTTCATCAGCATGC  
AAAATCTTAACATATTAACAAGCAGTGAGACATGGTTATCTGACCATGACCACCTCTGCA  
+  
FFFFFFFFFFFF, FFFFFFFFFFFFFFFFFFFFFF: FFFFFFFF: FFF: FFFFFF, FFF: FFFFFFFFFFFFFF  
FFFFFFFFFFFFFFFFFFFFFFFFFFFFFFFF: FFFFFFFFFFFFFFFFFFFFFFFFFF  
@A00155:342:HHGFNDSXY:1:2525:16396:12790 2:N:0:GAACCTAG+TCCGCATA  
GTCAGAGTATGTTCCCAGCTCACCTTTAGCGATCCCTCATTAGATTCTTGCATCTTCATCAGCATGC  
AAAATCTTAACATATTAACAAGCAGTGAGACATGGTTATCTGACCATGACCACCTCTGCA  
+  
FFFFFFFFFFFFFFFFFFFFFFFFFFFFFFFF: FFFFFF: FFFFFFFFFFFFFFFFFFFFFFFFFF  
FFFFFFFFFFFFFFFFFFFFFFFF: FFFFFFFFFF: FFFFFFFFFF: FFFFFFFFFF  
@A00155:342:HHGFNDSXY:1:1319:3721:27383 2:N:0:GAACCTAG+TCCGCATA  
GTCAGAGTATGTTCCCAGCTCACCTTTAGCGATCCCTCATTAGATTCTTGCATCTTCATCAGCATGC  
AAAATCTTAACATATTAACAAGCAGTGAGACATGGTTATCTGACCATGACCACCTCTGCATAG  
+  
FFFFFFFFFFFF: FFFFFFFFFFFFFFFFFFFFFFFFFF  
FFFFFFFFFFFF, F: F: F: FFFFFFFFFFFFFFFFFFFFFFFFFF  
@A00155:342:HHGFNDSXY:1:1124:14940:12085 2:N:0:GAACCTAG+TCCGCATA  
GTCAGAGTATGTTCCCAGCTCACCTTTAGCGATCCCTCATTAGATTCTTGCATCTTCATCAGCATGC  
AAAATCTTAACATATTAACAAGCAGTGAGACATGGTTATCTGACCATGACCACCTCTGCATAGCGTTC  
+  
FFFFFFFFFFFFFFFFFFFFFFFFFFFFFFFF: FFFFFFFFFFFFFFFFFFFFFFFFFF  
FFFFFFFFFFFFFFFF: FFFFF, : FFFFFFFFFFFFFFFFFFFFFFFFFF  
@A00155:342:HHGFNDSXY:1:1657:31693:21245 2:N:0:GAACCTAG+TCCGCATA  
GTCAGAGTATGTTCCCAGCTCACCTTTAGCGATCCCTCATTAGATTCTTGCATCTTCATCAGCATGC  
AAAATCTTAACATATTAACAAGCAGTGAGACATGGTTATCTGACCATGACCACCTCTGCATAGCGTTC  
+  
FFFFFFFFFFFFFFFFFFFFFFFFFFFFFFFF: FFFFFFFFFFFFFFFFFFFFFFFFFF  
FFFFFFFFFFFFFFFF: FFFFFFFFFF: FFFFFFFFFF: FFFFFFFFFF: FFFFFFFFFF  
@A00155:342:HHGFNDSXY:1:2275:31015:35321 1:N:0:GAACCTAG+TCCGCATA  
GTCAGAGTATGTTCCCAGCTCACCTTTAGCGATCCCTCATTAGATTCTTGCATCTTCATCAGCATGC  
AAAATCTTAACATATTAACAAGCAGTGAGACATGGTTATCTGACCATGACCACCTCTGCATAGCGTTC  
+  
FFFFFFFFFFFF: FFFFFFFFFFFFFFFFFFFFFF:, FFFFFFFFFFFFFFFFFFFFFFFFFF  
FFFF: FFFF: F: FFFF: FFFFFFFFFFFFFFFFFFFFFFFFFF  
@A00155:342:HHGFNDSXY:1:2375:7762:29152 2:N:0:GAACCTAG+TCCGCATA  
CAGAGTATGTTCCCAGCTCACCTTTAGCGATCCCTCATTAGATTCTTGCATCTTCATCAGCATGCA

AATCTTAACATATTAACAAGCAGTGAGACATGGTTATCTGACCATGACCACCTCTGCATAGCGT  
+  
FFFFFFFF:FFFFFFFFFFFFFFFF:FFFFFFFFFFFFFFFF:FF,FFFFFFFF:FFFFF:FFFFFFFFFFFFFFFFFFFF  
FFFF:FFFFF:FFFFFFFF:FF:F:FFFFFFFFFFFFFFFFFFFFFFFFFFFFFFFFFFFFFFFF:FFFFFFFFFFFF  
@A00155:342:HHGFNDSXY:1:2660:18023:21997 2:N:0:GAACCTAG+TCCGCATA  
CAGAGTATGTTCCCAGCTCACCTTTCAGCGATCCCTCATAGATTCTTGATCTTCATCAGCATGCAA  
AATCTTAACATATTAACAAGCAGTGAGACATGGTTATCTGACCATGACCACCTCTGCATAGCGT  
+  
F:FFFFF:F:FFFFF:FFFFFFFFFFFF:F:FFFFFFFFFFFFFFFFFFFFFFFFFFFFFFFFFFFFFFFFFFFFF  
FFFFFFFFFFFFFFFFFFFFF::FFFFFFFFFFFFFFFFFFFFFFFFFFFFFFFFFFFFFFFFFFFFFFFFFFFFF  
@A00155:342:HHGFNDSXY:1:2375:6488:28260 2:N:0:GAACCTAG+TCCGCATA  
CAGAGTATGTTCCCAGCTCACCTTTCAGCGATCCCTCATAGATTCTTGATCTTCATCAGCATGCAA  
AATCTTAACATATTAACAAGCAGTGAGACATGGTTATCTGACCATGACCACCTCTGCATAGCGT  
+  
FFFFFFFFFFFFFFFFFFFFFFFFFFFFFFFFFFFFFFFFFFFFFFFFFFFFFFFFFFFFFFFFFFFFFFFFFFFFF  
FF,FFFFFFFFFFFFFFFFFFFF:FFF:FFFFFFFFFFFFFFFFFFFFFFFFFFFFFFFFFFFFFFFFFFFFF:FFFFFFFFF  
@A00155:342:HHGFNDSXY:1:1114:23502:36996 2:N:0:GAACCTAG+TCCGCATA  
AGAGTATGTTCCCAGCTCACCTTTCAGCGATCCCTCATAGATTCTTGATCTTCATCAGCATGCAAA  
ATCTTAACATATTAACAAGCAGTGAGACATGGTTATCTGACCATGACCACCTCTGCATAGCGTTC  
+  
FFFFFFFFFFFFFFFFFFFFFFFFFFFFFFFFFFFFFFFFFFFFFFFFFFFFFFFFFFFFFFFFFFFFFFFFFFFFF  
FFFFFFFFFFFFFFFFFFFFFFFFFFFFFFFFFFFFFFFFFFFFF:FFFFFFFFFFFFFFFFF:FFFFF:FFFFFFFFFFFF  
@A00155:342:HHGFNDSXY:1:1139:32678:11428 2:N:0:GAACCTAG+TCCGCATA  
AGAGTATGTTCCCAGCTCACCTTTCAGCGATCCCTCATAGATTCTTGATCTTCATCAGCATGCAAA  
ATCTTAACATATTAACAAGCAGTGAGACATAGTTATCTGACCATGACCACCTCTGCATAGCGTTCACG  
+  
FFFFFFFFF:FFFFFFFFFFFFFFFFFFFFFFFFFFFFFFFFFFFFFFFFFFFFF:FFFFF:FFFFFFFFFFFFFFFFF  
FFFFFFFFFFFFFFFFF:F,,:FFFFFFFFFFFFFFFFFFFFFFFFFFFFFFFFFFFFFFFFFFFFFFFFFFFFF  
@A00155:342:HHGFNDSXY:1:2530:2320:30906 1:N:0:GAACCTAG+TCCGCATA  
GAGTATGTTCCCAGCTCACCTTTCAGCGATCCCTCATAGATTCTTGATC  
+  
FFFFFFFFFFFFFFFFFFFFFFFFFFFFFFFFFFFF,FFFFFFFFFFFFFFFFF:FFFFF  
@A00155:342:HHGFNDSXY:1:2345:28528:1172 1:N:0:GAACCTAG+TCCGCATA  
GAGTATGTTCCCAGCTCACCTTTCAGCGATCCCTCATAGATTCTTGATCTTCATCAGCATGCAAAA  
TCTTAACATATTAACAAGCAGTGAGACATGGTTATCTGACCATGACCACCTCTGCATAGCGTTCACGT  
+  
FFFFFFFFFFFFFFFFFFFFFFFFFFFFFFFFFFFF,FFFFFFFFFFFFFFFFFFFFFFFFFFFFFFFFFFFFF:FFFFFFFFF  
FFFFFFFFFFFFFFFFFFFFFFFFFFFFFFFFFFFFFFFFFFFFF:,FFFFFFFFFFFFFFFFFFFFFFFFFFFFF  
@A00155:342:HHGFNDSXY:1:1672:14018:34381 1:N:0:GAACCTAG+TCCGCATA  
GAGTATGTTCCCAGCTCACCTTTCAGCGATCCCTCATAGATTCTTGATCTTCATCAGCATGCAAAA  
TCTTAACATATTAACAAGCAGTGAGACATGGTTATCTGACCATGACCACCTCTGCATAGCGTTCACGT  
+  
FFFFFFFFFFFFFFFFFFFFFFFFFFFFFFFFFFFFFFFFFFFFFFFFFFFFFFFFFFFFFFFFFFFFFFFFFFFFF  
FFFFFFF:FFFFFFFFFFFFFFFFFFFFFFFFFFFFFFFFFFFFFFFFFFFFFFFFFFFFFFFFFFFFFFFFFFFFF  
@A00155:342:HHGFNDSXY:1:2613:21567:14888 1:N:0:GAACCTAG+TCCGCATA  
GTATGTTCCCAGCTCACCTTTCAGCGATCCCTCATAGATTCTTGATCTTCATCAGCATGCAAAATC  
TTAACATATTAACAAGCAGTGAGACATGGTTATCTGACCATGACCACCTCTGCATAGCGTTCACGTGT  
+  
FFFFF:FFFFFFFFFFFFFFFFFFFFFFFFFFFFFFFFFFFFFFFFFFFFFFFFFFFFFFFFFFFFFFFFFFFFF  
FF:FFFFFFFFFFFFFFFFFFFFFFFFFFFFFFFFFFFFFFFFFFFFFFFFFFFFFFFFFFFFFFFFFFFFF:FFFFF,FFFFF  
@A00155:342:HHGFNDSXY:1:1673:19117:23453 1:N:0:GAACCTAG+TCCGCATA  
GTATGTTCCCAGCTCACCTTTCAGCGATCCCTCATAGATTCTTGATCTTCATCAGCATGCAAAATC  
TTAACATATTAACAAGCAGTGAGACATGGTTATCTGACCATGACCACCTCTGCATAGCGTTCACGTGT  
+

```
FFFFFFFFFFFFFFFFFFFFFFFFFFFFFFFFFFFFFFFFFFFFFFFFFFFFFFFFFFFFFFFFFFFFFFFFF:FFFFFFFF:FFFFFFFFFFFFFFFFFFFF  
FFFFFFFFFFFFFFFFFFFFFFFFFFFFFFFFFFFFFFFFFFFFFFFFFFFFFFFFFFFFFFFFFFFFFFFFF:FFFFFFFFFFFFFFFF  
@A00155:342:HHGFNDSXY:1:2375:6488:28260 1:N:0:GAACCTAG+TCCGCATA  
ATGTTCCCAGCTCACCTTTCAGCGATCCCTCATTAGATTCTTG CATCTTCATCAGCATGCAAAATCTT  
AACATATTAACAAGCAGTGAGACATGGTTATCTGACCATGACCACCTCTGCATAGCGTTCACGTGTGT  
+  
FFFFFFFFFFFFFFFFFFFFFFFFFFFFFFFFFFFFFFFFFFFFFFFFFFFFFFFFFFFFFFFFFFFFFFFFF:FFFFFFF:FFFFFFFFFFFFFFFFFFFF:  
FFF:FFFFFFFFFFFFFFFFFFFFFFFFFFFFFFFFFFFFFFFFFFFFFFFFFFFFFFFFFFFFFFFFFFFFF:FFFF,FFFF,FFFFF  
@A00155:342:HHGFNDSXY:1:2375:7762:29152 1:N:0:GAACCTAG+TCCGCATA  
ATGTTCCCAGCTCACCTTTCAGCGATCCCTCATTAGATTCTTG CATCTTCATCAGCATGCAAAATCTT  
AACATATTAACAAGCAGTGAGACATGGTTATCTGACCATGACCACCTCTGCATAGCGTTCACGTGTGT  
+  
FFFFFFFFFFFFFFFFFFFFFFFFFFFFFFFFFFFFFFFFFFFFFFFFFFFFFFFFFFFFFFFFFFFFFFFFF,FFFFFFFFFFFFFFFFFFFFFFFFFFFFF  
FFF:FFFFFFFFFFFFFFFFFFFFFFFFFFFFFFFFFFFFFFFFFFFFFFFFFFFFFFFFFFFFFFFFFFFFF,FFFFFFFFF:FFFFFFFFF  
@A00155:342:HHGFNDSXY:1:1127:20500:24596 2:N:0:GAACCTAG+TCCGCATA  
GTTCCCAGCTCACCTTTCAGCGATCCCTCATTAGATTCTTG CATCTTCATCAGCATGCAAAATCTTA  
CATATTAACAAGCAGTGAGACATGGTTATCTGACCATGACCACCTCTGCATAGCGTTCACGTGTGTAG  
+  
FFFFFFFFFFFFF:FFFFFFFFFFFFFFFFFFFFFFFFFFFFFFFFFFFFFFFFFFFFFFFFFFFFFFFFFFFFF,FF,FFFFFFFFF:FFFFFFFFF  
FFFFFFFFF:FFFFFFFFFFFFFFFFFFFFFFFFFFFFFFFFFFFFFFFFFFFFFFFFFFFFFFFFFFFFFFFFFFFFF:FFFF:FFFFFFFFF  
@A00155:342:HHGFNDSXY:1:1657:31693:21245 1:N:0:GAACCTAG+TCCGCATA  
TTCCCAGCTCACCTTTCAGCGATCCCTCATTAGATTCTTG CATCTTCATCAGCATGCAAAATCTTAAC  
ATATTAACAAGCAGTGAGACATGGTTATCTGACCATGACCACCTCTGCATAGCGTTCACGTGTGTAGA  
+  
FFFFFFFFFFFFFFFFF:FFFFFFFFFFFFFFFFFFFFFFFFFFFFFFFFFFFFFFFFFFFFFFFFFFFFFFFFFFFFF:FFFFFFFFFFFFFFFFFFFFF:FFFFFFFFF  
FFFFFFFFFFFFFFFFFFFFFFFFFFFFFFFFFFFFFFFFFFFFFFFFFFFFFFFFFFFFFFFFFFFFFFFFFFFFF:FFFF:FFFFFFFFF  
@A00155:342:HHGFNDSXY:1:1601:8278:16799 1:N:0:GAACCTAG+TCCGCATA  
TTCCCAGCTCACCTTTCAGCGATCCCTCATTAGATTCTTG CATCTTCATCAGCATGCAAAATCTTAAC  
ATATTAACAAGCAGTGAGACATGGTTATCTGACCATGACCACCTCTGCATAGCGTTCACGTGTGTAGA  
+  
FFFFFFFFFFFFFFFFFFFFFFFFFFFFFFFFFFFFF,FFFFFFFFFFFFFFFFFFFFF,FFFFFFFFF,FFFFFFFFFFFFFFFFFFFFFFFFFFFFF  
::FFFFFFFFFFFFFFFFFFFFFFFFFFFFFFFFFFFFFFFFFFFFFFFFFFFFFFFFFFFFFFFFFFFFF:FFF:FFFFFFFFFFFFFFFFFFFFFFFFFFFFF  
@A00155:342:HHGFNDSXY:1:2319:18557:12587 1:N:0:GAACCTAG+TCCGCATA  
TTCCCAGCTCACCTTTCAGCGATCCCTCATTAGATTCTTG CATCTTCATCAGCATGCAAAATCTTAAC  
ATATTAACAAGCAGTGAGACATGGTTATCTGACCATGACCACCTCTGCATAGCGTTCACGTGTGTAGA  
+  
FFFFFFFFFFFFFFFFFFFFFFFFFFFFFFFFFFFFFFFFFFFFFFFFFFFFFFFFFFFFFFFFFFFFFFFFF:FFFFFFFFFFFFFFFFF:FFFFFFFFFFFFFFFFFFFFF  
:FFFFFFFFFFFFFFFFFFFFFFFFFFFFFFFFFFFFFFFFFFFFFFFFFFFFFFFFFFFFFFFFFFFFFFFFFFFFF:FFFFFFFFFFFFFFFFFFFFFFFFFFFFF  
@A00155:342:HHGFNDSXY:1:1546:19696:27085 1:N:0:GAACCTAG+TCCGCATA  
TTCCCAGCTCACCTTTCAGCGATCCCTCATTAGATTCTTG CATCTTCATCAGCATGCAAAATCTTAAC  
ATATTAACAAGCAGTGAGACATGGTTATCTGACCATGACCACCTCTGCATAGCGTTCACGTGTGTAGA  
+  
FFFFFFFFFFFFFFFFFFFFF:FFFFFFF::FFFFFFFFFFFFFFFFFFFFFFFFFFFFFFFFFFFFFFFFFFFFFFFFFFFFFFFFFFFFFFFFFFFFF  
FFFFFFFFFFFFFFFFFFFFFFFFFFFFFFFFFFFFF::FFFFF:FFFFFFFFFFFFFFFFFFFFFFFFFFFFFFFFFFFFFFFFFFFFFFFFFFFFF  
@A00155:342:HHGFNDSXY:1:1632:23601:2503 1:N:0:GAACCTAG+TCCGCATA  
TTCCCAGCTCACCTTTCAGCGATCCCTCATTAGATTCTTG CATCTTCATCAGCATGCAAAATCTTAAC  
ATATTAACAAGCAGTGAGACATGGTTATCTGACCATGACCACCTCTGCATAGCGTTCACGTGTGTAGA  
+  
FFFFFFFFFFFFFFFFFFFFFFFFFFFFFFFFFFFFF,FFFFFFFFFFFFFFFFFFFFFFFFFFFFFFFFFFFFF:FFFFFFFFFFFFFFFFF::FFFFFFFFF  
:FFFFFFFFF:FFFFFFFFFFFFFFFFFFFFFFFFFFFFFFFFFFFFFFFFFFFFFFFFFFFFFFFFFFFFFFFFFFFFF:FFFFFFFFFFFFFFFFFFFFFFFFFFFFF  
@A00155:342:HHGFNDSXY:1:2241:30092:30718 1:N:0:GAACCTAG+TCCGCATA  
TTCCCAGCTCACCTTTCAGCGATCCCTCATTAGATTCTTG CATCTTCATCAGCATGCAAAATCTTAAC  
ATATTAACAAGCAGTGAGACATGGTTATCTGACCATGACCACCTCTGCATAGCGTTCACGTGTGTAGA  
+
```

FFFFFFFFFFFFFFFFFFFFFFFF:FFF,FFFFFFFFFFFFFFFFFFFFFFFFFFFFFFFFFFFFFFFFFFFFFFFF  
FFFFFFFFFFFF,FFFFFFFFFFFFFFFFFFFFFFFFFFFFFFFFFFFFFFFFFFFFFFFF:FFFFFFFF:FFFFFFFFFFFFFFFFFFFFFFFF:F  
@A00155:342:HHGFNDSXY:1:2358:22742:7654 1:N:0:GAACCTAG+TCCGCATA  
TTCCCAGCTCACCTTTTCAGCGATCCCTCATTAGATTCTTGCATCTTCATCAGCATGCAAAATCTTAAC  
ATATTAACAAGCAGTGAGACATGGTTATCTGACCATGACCACCTCTGCATAGCGTTCACGTGTGTAGA  
+  
FFFFFFFFFFFFFFFFFFFFFFFF:FFFFFFFFFFFFFFFFFFFFFFFFFFFFFFFFFFFFFFFF:FFFFFFFFFFFFFFFF  
FFFFFFFFFFFFFFFFFFFFFFFFFFFFFFFFFFFFFFFFFFFFFFFFFFFFFFFFFFFFFFFFFFFFFFFFFFFFFFFF  
@A00155:342:HHGFNDSXY:1:1540:10990:18176 1:N:0:GAACCTAG+TCCGCATA  
TTCCCAGCTCACCTTTTCAGCGAGCCCTCATTAGATTCTTGCATCTTCATCAGCATGCAAAATCTTAAC  
ATATTAACAAGCAGTGAGACATGGTTATCTGACCATGACCACCTCTGCATAGCGTTCACGTGTGTAGA  
+  
FFFFFFFFFFFFFFFFFFFFFFFF, :FFFFFFFFFFFFFFFFFFFFFFFFFFFFFFFFFFFFFFFFFFFFFFFF  
FFFFFFFFFFFFFFFFFFFFFFFF:FFFFFFFFFF:FFFFFF:FFFFFFFFFFFFFFFFFFFFFFFFFFFFFFFF  
@A00155:342:HHGFNDSXY:1:1560:10999:13369 1:N:0:GAACCTAG+TCCGCATA  
TTCCCAGCTCACCTTTTCAGCGATCCCTCATTAGATTCTTGCATCTTCATCAGCATGCAAAATCTTAAC  
ATATTAACAAGCAGTGAGACATGGTTATCTGACCATGACCACCTCTGCATAGCGTTCACGTGTGTAGA  
+  
FFFFFFFFFFFFFFFFFFFFFFFFFFFFFFFFFFFFFFFF:FFFFFFFFFFFF,FFFFFFFFFFFFFFFFFFFFFFFF  
:FFFFFFFFFFFFFFFFFFFFFFFFFFFFFFFFFFFFFFFFFFFFFFFFFFFFFFFFFFFFFFFFFFFFFFFF,FFFFFF  
@A00155:342:HHGFNDSXY:1:1667:23665:12289 1:N:0:GAACCTAG+TCCGCATA  
TTCCCAGCTCACCTTTTCAGCGATCCCTCATTAGATTCTTGCATCTTCATCAGCATGCAAAATCTTAAC  
ATATTAACAAGCAGTGAGACATGGTTATCTGACCATGACCACCTCTGCATAGCGTTCACGTGTGTAGA  
+  
FFFFFFFFFFFFFFFFFFFFFFFFFFFF,FFFFFFFFFFFFFFFFFFFFFFFFFFFFFFFF:FFFFFFFFFFFFFFFF  
:FFFFFFFFFFFFFFFFFFFFFFFFFFFFFFFFFFFFFFFFFFFFFFFFFFFFFFFFFFFFFFFFFFFFFFFF  
@A00155:342:HHGFNDSXY:1:2116:28537:30123 1:N:0:GAACCTAG+TCCGCATA  
TTCCCAGCTCACCTTTTCAGCGATCCCTCATTAGATTCTTGCATCTTCATCAGCATGCAAAATCTTAAC  
ATATTAACAAGCAGTGAGACATGGTTATCTGACCATGACCACCTCTGCATAGCGTTCACGTGTGTAGA  
+  
FFFFFFFFFFFFFFFFFFFFFFFF:F:FFFFFFFFFFFFFFFFFFFFFFFFFFFFFFFFFFFFFFFFFFFFFFFF  
:FFFFFFFFFFFFFFFFFFFFFFFFFFFFFFFFFFFFFFFFFFFFFFFFFFFFFFFFFFFFFFFFFFFFFFFF  
@A00155:342:HHGFNDSXY:1:1622:14461:18709 1:N:0:GAACCTAG+TCCGCATA  
TTCCCAGCTCACCTTTTCAGCGATCCCTCATTAGATTCTTGCATCTTCATCAGCATGCAAAATCTTAAC  
ATATTAACAAGCAGTGAGACATGGTTATCTGACCATGACCACCTCTGCATAGCGTTCACGTGTGTAGA  
+  
FFFFFFFFFFFFFFFFFFFFFFFFFFFFFFFFFFFFFFFF:FFFFFFFFFFFFFFFF:FFFFFF:FF  
FFFFFFFFFFFFFFFFFFFFFFFFFFFFFFFFFFFFFFFFFFFFFFFFFFFFFFFFFFFFFFFFFFFFFFFF:FFF  
@A00155:342:HHGFNDSXY:1:1613:7274:16250 1:N:0:GAACCTAG+TCCGCATA  
TTCCCAGCTCACCTTTTCAGCGATCCCTCATTAGATTCTTGCATCTTCATCAGCATGCAAAATCTTAAC  
ATATTAACAAGCAGTGAGACATGGTTATCTGACCATGACCACCTCTGCATAGCGTTCACGTGTGTAGA  
+  
FF:FFFFFFFFFFFFFFFF:FFFF, :FFFFFFFFFFFF:FFFFFFFFFFFFFFFFFFFFFFFFFFFFFFFF  
:FFFFFFFFFFFFFFFFFFFFFFFF:FFFFFFFFFFFFFFFFFFFFFFFFFFFFFFFF,FFFFFFFF:FFFFFF  
@A00155:342:HHGFNDSXY:1:1108:16749:19601 1:N:0:GAACCTAG+TCCGCATA  
TTCCCAGCTCACCTTTTCAGCGATCCCTCATTAGATTCTTGCATCTTCATCAGCATGCAAAATCTTAAC  
ATATTAACAAGCAGTGAGACATGGTTATCTGACCATGACCACCTCTGCATAGCGTTCACGTGTGTAGA  
+  
FFFFF:FFFFFFFF:FFFF,FFFFFFFFFFFFFFFFFFFFFFFFFFFFFFFF,FFFFFFFFFFFFFFFF  
:FFFFFFFFFFFFFFFFFFFFFFFF:FFFFFFFFFFFFFFFFFFFFFFFFFFFFFFFFFFFFFFFF:FFF:F  
@A00155:342:HHGFNDSXY:1:2345:11098:17550 2:N:0:GAACCTAG+TCCGCATA  
TCCCAGCTCACCTTTTCAGCGATCCCTCATTAGATTCTTGCATCTTCATCAGCATGCAAAATCTTAACA  
TATTAACAAGCAGTGAGACATGGTTATCTGACCATGACCACCTCTGCATAGCGTTCACGTGTGTAGAC  
+

FFFFFFFFFFFFFFFFFFFFFFFFFFFFFFFFFFFFFFFFFFFFFFFFFFFFFFFFFFFFFFFFFFFFFFFFFFFFFFFF  
FFFFF:FF,FFFFFFFFFFFFFFFFFFFFFFFFFFFFFFFFFFFFFFFFFFFFFFFFFFFFFFFFFFFFFFFFFFFFFFFF  
@A00155:342:HHGFNDSXY:1:1274:29559:20744 2:N:0:GAACCTAG+TCCGCATA  
TCCCAGCTCACCTTTCAGCGATCCCTCATTAGATTCTTGCATCTTCATCAGCATGCAAAATCTTAACA  
TATTAACAAGCAGTGAGACATGGTTATCTGACCATGACCACCTCTGCATAGCGTTCACGTGTGTAGAC  
+  
FFFFFFFFFFFFFFFFFFFFFFFFFFFFFFFFFFFFFFFFFFFFFFFFFFFFFFFFFFFFFFFFFFFFFFFFFFFFFFFF  
F,FF,:F,FFFFFFFFFFFFFFFFFFFFFFFFFFFFFFFFFFFFFFFFFFFFFFFFFFFFFFFFFFFFFFFFFFFFFFFF  
@A00155:342:HHGFNDSXY:1:1255:2989:11835 2:N:0:GAACCTAG+TCCGCATA  
TCCCAGCTCACCTTTCAGCGATCCCTCATTAGATTCTTGCATCTTAATCAGCATGCAAAATCTTAACA  
TATTAACAAGCAGTGAGACATGGTTATCTGACCATGACCACCTCTGCATAGCGTTCACGTGTGTAGAC  
+  
:,:FF::FFFFFFFFFFFFFFFFFFFFFFFFFFFFFFFFFFFFFFFFFFFFFFFFFFFFFFFFFFFFFFFFFFFFFFFF  
FFFFFFFFFFFFFFFFFFFFFFFFFFFFFFFFFFFFFFFFFFFFFFFFFFFFFFFFFFFFFFFFFFFFFFFFFFFFFFFF  
@A00155:342:HHGFNDSXY:1:1124:14940:12085 1:N:0:GAACCTAG+TCCGCATA  
CCCAGCTCACCTTTCAGCGATCCCTCATTAGATTCTTGCATCTTCATCAGCATGCAAAATCTTAACAT  
ATTAACAAGCAGTGAGACATGGTTATCTGACCATGACCACCTCTGCATAGCGTTCACGTGTGTGA  
+  
FFFFFFFFFFFFFFFFFFFFFFFFFFFFFFFFFFFFFFFFFFFFFFFFFFFFFFFFFFFFFFFFFFFFFFFFFFFFFFFF  
FFFFFFFFFFFFFFFFFFFFFFFFFFFFFFFFFFFFFFFFFFFFFFFFFFFFFFFFFFFFFFFFFFFFFFFFFFFFFFFF  
@A00155:342:HHGFNDSXY:1:2661:3739:22623 1:N:0:GAACCTAG+TCCGCATA  
CCCAGCTCACCTTTCAGCGATCCCTCATTAGATTCTTGCATCTTCATCAGCATGCAAAATCTTAACAT  
ATTAACAAGCAGTGAGACATGGTTATCTGACCATGACCACCTCTGCATAGCGTTCACGTGTGTGA  
+  
FF:FFFFFFFFFFFFFFFFFFFFFFFFFFFFFFFFFFFFFFFFFFFFFFFFFFFFFFFFFFFFFFFFFFFFFFFF  
FFFFFFFFFFFFFFFFFFFFFFFFFFFFFFFFFFFFFFFFFFFFFFFFFFFFFFFFFFFFFFFFFFFFFFFFFFFFFFFF  
@A00155:342:HHGFNDSXY:1:2331:29423:34162 1:N:0:GAACCTAG+TCCGCATA  
CCAGCTCACCTTTCAGCGATCCCTCATTAGATTCTTGCATCTTCATCAGCATGCAAAATCTTAACATA  
TTAACAAGCAGTGAGACATGGTTATCTGACCATGACCACCTCTGCATAGCGTTCACGTGTG  
+  
FFFFFFFFFFFFFFFFFFFFFFFFFFFFFFFFFFFFFFFFFFFFFFFFFFFFFFFFFFFFFFFFFFFFFFFFFFFFFFFF  
:FFFFFFFFFFFFFFFFFFFFFFFFFFFFFFFFFFFFFFFFFFFFFFFFFFFFFFFFFFFFFFFFFFFFFFFFFFFFFFFF  
@A00155:342:HHGFNDSXY:1:2347:10538:17675 1:N:0:GAACCTAG+TCCGCATA  
CCAGCTCACCTTTCAGCGATCCCTCATTAGATTCTTGCATCTTCATCAGCATGCAAAATCTTAACATA  
TTAACAAGCAGTGAGACATGGTTATCTGACCATGACCACCTCTGCATAGCGTTCACGTGTGTGA  
+  
F:FFFFFFFFFFFFFFFFFFFFFFFFFFFFFFFFFFFFFFFFFFFFFFFFFFFFFFFFFFFFFFFFFFFFFFFF  
:,FFFFFFFFFFFFFFFFFFFFFFFFFFFFFFFFFFFFFFFFFFFFFFFFFFFFFFFFFFFFFFFFFFFFFFFF  
@A00155:342:HHGFNDSXY:1:1668:20166:34726 1:N:0:GAACCTAG+TCCGCATA  
CCAGCTCACCTTTCAGCGATCCCTCATTAGATTCTTGCATCTTCATCAGCATGCAAAATCTTAACATA  
TTAACAAGCAGTGAGACATGGTTATCTGACCATGACCACCTCTGCATAGCGTTCACGTGTGTAGACCA  
+  
FFFFFFFFFFFFFFFFFFFFFFFFFFFFFFFFFFFFFFFFFFFFFFFFFFFFFFFFFFFFFFFFFFFFFFFFFFFFFFFF  
FFFFFFFFFFFFFFFFFFFFFFFFFFFFFFFFFFFFFFFFFFFFFFFFFFFFFFFFFFFFFFFFFFFFFFFFFFFFFFFF  
@A00155:342:HHGFNDSXY:1:2214:15447:7889 1:N:0:GAACCTAG+TCCGCATA  
CCAGCTCACCTTTCAGCGATCCCTCATTAGATTCTTGCATCTTCATCAGCATGCAAAATCTTAACATA  
TTAACAAGCAGTGAGACATGGTTATCTGACCATGACCACCTCTGCATAGCGTTCACGTGTGTAGACCA  
+  
FFFFFFFFFFFFFFFFFFFFFFFFFFFFFFFFFFFFFFFFFFFFFFFFFFFFFFFFFFFFFFFFFFFFFFFFFFFFFFFF  
FFFFFFFFFFFFFFFFFFFFFFFFFFFFFFFFFFFFFFFFFFFFFFFFFFFFFFFFFFFFFFFFFFFFFFFFFFFFFFFF  
@A00155:342:HHGFNDSXY:1:1620:21079:25347 1:N:0:GAACCTAG+TCCGCATA  
CCAGCTCACCTTTCAGCGATCCCTCATTAGATTCTTGCATCTTCATCAGCATGCAAAATCTTAACATA  
TTAACAAGCAGTGAGACATGGTTATCTGACCATGACCACCTCTGCATAGCGTTCACGTGTGTAGACCA  
+

FFFFFFFFFFFFFFFFFFFFFFFFFFFFFFFFFFFFFFFFFFFFFFFFFFFFFFFFFFFFFFFF  
FFFFFFFFFFFFFFFFFFFFFFFFFFFFFFFFFFFFFFFFFFFFFFFFFFFFFFFFFFFFFFFF  
@A00155:342:HHGFNDSXY:1:1376:3839:23046 1:N:0:GAACCTAG+TCCGCATA  
CCAGCTCACCTTTGAGCATCCCTCATTAGATTCTTGATCTTCATCAGCATGCAAAATCTTAACATA  
TTACAAGCAGTGAGACATGGTTATCTGACCATGACCACCTCTGCATAGCGTTCACGTGTGTAGACCA  
+  
FFFFFFFFFFFFFFFFFFFFFFFFFFFFFFFFFFFFFFFFFFFFFFFFFFFFFFFFFFFFFFFF  
FFFFFFFFFFFFFFFFFFFFFFFFFFFFFFFFFFFFFFFFFFFFFFFFFFFFFFFFFFFFFFFF  
@A00155:342:HHGFNDSXY:1:1611:10375:12383 1:N:0:GAACCTAG+TCCGCATA  
CCAGCTCACCTTTGAGCATCCCTCATTAGATTCTTGATCTTCATCAGCATGCAAAATCTTAACATA  
TTACAAGCAGTGAGACATGGTTATCTGACCATGACCACCTCTGCATAGCGTTCACGTGTGTAGACCA  
+  
FFFFFFFFFFFFFFFFFFFFFF:,F:,FFF,FFFFFFFF,:,FFFFFF,FF,FFFF:F:,FFFF:F:F  
F,FFFF,FFFFFF::F:FF,FF,F:FF,:FFF,FFFFFFFF:F:FFF:FFFFFFFF:FFFF,FF:FF  
@A00155:342:HHGFNDSXY:1:1605:28610:14434 1:N:0:GAACCTAG+TCCGCATA  
CCAGCTCACCTTTGAGCATCCCTCATTAGATTCTTGATCTTCATCAGCATGCAAAATCTTAACATA  
TTACAAGCAGTGAGACATGGTTATCTGACCATGACCACCTCTGCATAGCGTTCACGTGTGTAGACCA  
+  
FFFFFFFFFFFFFFFFFFFFFF:FFFFFFFFFFFFFFFFFFFFFFFFFFFFFFFFFFFFFFFF:FF  
FFFFFFFFFFFFFFFFFFFFFFFFFFFFFFFFFFFFFFFFFFFFFFFFFFFFFFFFFFFFFFFF  
@A00155:342:HHGFNDSXY:1:2345:11098:17550 1:N:0:GAACCTAG+TCCGCATA  
CCAGCTCACCTTTGAGCATCCCTCATTAGATTCTTGATCTTCATCAGCATGCAAAATCTTAACATA  
TTACAAGCAGTGAGACATGGTTATCTGACCATGACCACCTCTGCATAGCGTTCACGTGTGTAGACCA  
+  
FFFFFFFFFFFFFFFFFFFFFF,FFFFFFFFFFFFFFFFFFFFFFFFFFFFFFFFFFFFFFFF:FFFFFF:FF  
FFFFFFFFFFFFFFFFFFFFFFFFFFFFFFFFFFFFFFFFFFFFFFFFFFFFFFFFFFFFFFFF  
@A00155:342:HHGFNDSXY:1:2216:25916:9173 1:N:0:GAACCTAG+TCCGCATA  
CCAGCTCACCTTTGAGCATCCCTCATTAGATTCTTGATCTTCATCAGCATGCAAAATCTTAACATA  
TTACAAGCAGTGAGACATGGTTATCTGACCATGACCACCTCTGCATAGCGTTCACGTGTGTAGACCA  
+  
FFFFFFFFFFFFFFFFFFFFFF:FFFFFFFFFFFFFFFFFFFFFFFFFFFFFFFFFFFFFFFF:FF  
FFFFFFFFFFFFFFFFFFFFFFFFFFFFFFFFFFFFFFFFFFFFFFFFFFFFFFFFFFFFFFFF  
@A00155:342:HHGFNDSXY:1:1306:18439:6809 1:N:0:GAACCTAG+TCCGCATA  
CCAGCTCACCTTTGAGCATCCCTCATTAGATTCTTGATCTTCATCAGCATGCAAAATCTTAACATA  
TTACAAGCAGTGAGACATGGTTATCTGACCATGACCACCTCTGCATAGCGTTCACGTGTGTAGACCA  
+  
FFFFFFFFFFFFFFFFFFFFFFFFFFFFFFFFFFFFFFFFFFFFFFFFFFFFFFFFFFFFFFFF:FF  
FFFFFFFFFFFFFFFFFFFFFFFFFFFFFFFFFFFFFFFFFFFFFFFFFFFFFFFFFFFFFFFF  
@A00155:342:HHGFNDSXY:1:2668:26874:35978 2:N:0:GAACCTAG+TCCGCATA  
CAGCTCACCTTTGAGCATCCCTCATTAGATTCTTGATCTTCATCAGCATGCAAAATCTTAACATAT  
TAACAAGCAGTGAGACATGGTTATCTGACCATGACCACCTCTGCATAGCGTTCACGTGTGTAGACCA  
+  
FF:,FFFFFFFFFFFF,FFFF,F,F:FFFF:F,:FFFF,FFFFFFFFFFFFFFFF:FFFFFFFFFFFF  
FF:F:FFFF,FFFFFFFF:FFFFFFFFFFFFFFFFFFFFFFFFFFFFFFFF,F:FFFFFFFFFFFF:FFF  
@A00155:342:HHGFNDSXY:1:1659:13386:26115 1:N:0:GAACCTAG+TCCGCATA  
CAGCTCACCTTTGAGCATCCCTCATTAGATTCTTGATCTTCATCAGCATGCAAAATCTTAACATAT  
TAACAAGCAGTGAGACATGGTTATCTGACCATGACCACCTCTGCATAGCGTTCACGTGTGTAGACCAC  
+  
FFFFFFFFFFFFFFFFFFFFFFFFFFFFFFFFFFFFFFFFFFFFFFFFFFFFFFFFFFFFFFFF  
FFFFFFFFFFFFFFFFFFFFFFFFFFFFFFFFFFFFFFFFFFFFFFFFFFFFFFFFFFFFFFFF  
@A00155:342:HHGFNDSXY:1:1673:19117:23453 2:N:0:GAACCTAG+TCCGCATA  
CAGCTCACCTTTGAGCATCCCTCATTAGATTCTTGATCTTCATCAGCATGCAAAATCTTAACATAT  
TAACAAGCAGTGAGACATGGTTATCTGACCATGACCACCTCTGCATAGCGTTCACGTGTGTAGACCAC  
+



FFFFFFFF:FF:FFFFFFFFFFFF:FFFFFF:FFFFFFFFFFFFFFFFFFFFFFFFFFFF:FFFFFFFFFF  
F:FFFFFFFFFFFFFFFFFFFFFFFFFFFFFFFFFFFFFFFFFFFFFFFFFFFFFFFFFFFFFFFF  
@A00155:342:HHGFNDSXY:1:1407:26865:25942 2:N:0:GAACCTAG+TCCGCATA  
CAGCTCACCTTTAGCGATCCCTCATTAGATTCTTGCATCTTCATCAGCATGCAAAATCTTAACATAT  
TAACAAGCAGTGAGACATGGTTATCTGACCATGACCACCTCTGCATAGCGTTCACGTGTGTAGACCAC  
+  
FFFFFFFFFFFFFFFFFFFFFFFFFFFF,FFFFFF,FFFFFFFFFFFFFFFFFFFFFFFFFFFFFFFFFFFF  
FFFFFFFF:FFFFFFFFFFFFFFFFFFFFFFFFFFFFFFFFFFFFFFFFFFFFFFFFFFFFFFFFFFFF  
@A00155:342:HHGFNDSXY:1:1523:31593:14591 2:N:0:GAACCTAG+TCCGCATA  
CAGCTCACCTTTAGCGATCCCTCATTAGATTCTTGCATCTTCATCAGCATGAAAAATCTTAACATAT  
TAACAAGCAGTGAGACATGGTTATCTGACCATGACCACCTCTGCATAGCGTTCACGTGTGTAGACCAC  
+  
FFFFF:FFFFFFFF:FFFFFFFF:FFFFF:FFFFFFFF:FFFFFFFFFFFFFFFFFFFF,FFFFFF  
F,:F:,FFFFFFFFFFFFFFFFFFFFFFFFFFFFFFFFFFFFFFFFFFFFFFFFFFFFFFFFFFFF:FFFFFFFFFFFF  
@A00155:342:HHGFNDSXY:1:2358:22742:7654 2:N:0:GAACCTAG+TCCGCATA  
GCTCACCTTTAGCGATCCCTCATTAGATTCTTGCATCTTCATCAGCATGCAAAATCTTAACATATTA  
ACAAGCAGTGAGACATGGTTATCTGACCATGACCACCTCTGCATAGCGTTCACGTGTGTAGACCACAC  
+  
FFFFFFFFFFFFFFFFFFFFFFFFFFFF:FFFFFFFFFFFFFFFFFFFFFFFFFFFFFFFFFFFFFFFFFFFF  
,F:FFFFFFFFFFFFFFFFFFFFFFFFFFFFFFFFFFFFFFFFFFFFFFFFFFFFFFFFFFFFFFFFFFFF  
@A00155:342:HHGFNDSXY:1:1611:20907:20729 1:N:0:GAACCTAG+TCCGCATA  
GCTCACCTTTAGCGATCCCTCATTAGATTCTTGCATCTTCATCAGCATGCAAAATCTTAACATATTA  
ACAAGCAGTGAGACATGGTTATCTGACCATGACCACCTCTGCATAGCGTTCACGTGTGTAGACCACAC  
+  
F:FFFFFFFFFFFF:F:FF:F:FF:FFFFFFFF:FFF:FFFFFFFF:FFF:FFFFFFFFFFFFFFFFFFFF  
FFFF:FFFFFFFFFFFFFFFFFFFF:FFFFFFFFFFFF:FFF:FFFFFFFF:FFF:FFFFFFFFFFFFFFFF:  
@A00155:342:HHGFNDSXY:1:1526:10113:17816 1:N:0:GAACCTAG+TCCGCATA  
GCTCACCTTTAGCGATCCCTCATTAGATTCTTGCATCTTCATCAGCATGCAAAATCTTAACATATTA  
ACAAGCAGTGAGACATGGTTATCTGACCATGACCACCTCTGCATAGCGTTCACGTGTGTAGACCACAC  
+  
FFFFFFFFFFFFFFFFFFFF:FFFFFFFFFFFFFFFFFFFFFFFFFFFFFFFFFFFF,FFFFFFFFFFFF:FFFF  
FFFFFFFFFFFFFFFFFFFFFFFFFFFF:FFFFFFFFFFFFFFFFFFFFFFFFFFFFFFFFFFFFFFFFFFFF  
@A00155:342:HHGFNDSXY:1:1148:5837:12195 2:N:0:GAACCTAG+TCCGCATA  
GCTCACCTTTAGCGATCCCTCATTAGATTCTTGCATCTTCATCAGCATGCAAAATCTTAACATATTA  
ACAAGCAGTGAGACATGGTTATCTGACCATGACCACCTCTGCATAGCGTTCACGTGTGTAGACCACAC  
+  
FFFFFFFFFFFFFFFFFFFF:FFFFFFFFFFFF,FFFFFFFFFFFFFFFFFFFFFFFFFFFFFFFFFFFFFFFFFFFF  
FFF,FFFFFFFFFFFFFFFF:FFFFFFFFFFFFFFFFFFFFFFFFFFFFFFFFFFFF:FFFFFFFFFFFFFFFFFFFF  
@A00155:342:HHGFNDSXY:1:2607:25201:8437 2:N:0:GAACCTAG+TCCGCATA  
GCTCACCTTTAGCGATCCCTCATTAGATTCTTGCATCTTCATCAGCATGCAAAATCTTAACATATTA  
ACAAGCAGTGAGACATGGTTATCTGACCATGACCACCTCTGCATAGCGTTCACGTGTGTAGACCACAC  
+  
FFFFFFF:FFFFFFFFFFFFFFFFFFFF:FFFFFFFFFFFFFFFFFFFFFFFFFFFFFFFFFFFF:FFF:F  
FFFFFFFFFFFFFFFFFFFFFFFFFFFFFFFFFFFFFFFFFFFFFFFFFFFFFFFFFFFFFFFFFFFF  
@A00155:342:HHGFNDSXY:1:2607:25265:8547 2:N:0:GAACCTAG+TCCGCATA  
GCTCACCTTTAGCGATCCCTCATTAGATTCTTGCATCTTCATCAGCATGCAAAATCTTAACATATTA  
ACAAGCAGTGAGACATGGTTATCTGACCATGACCACCTCTGCATAGCGTTCACGTGTGTAGACCACAC  
+  
FFFFFFFFFFFFFFFFFFFFFFFFFFFFFFFFFFFFFFFFFFFFFFFFFFFFFFFFFFFFFFFFFFFF  
FFFFFFFFFFFFFFFFFFFFFFFFFFFFFFFFFFFFFFFFFFFFFFFFFFFFFFFFFFFFFFFFFFFF  
@A00155:342:HHGFNDSXY:1:1526:10791:19022 1:N:0:GAACCTAG+TCCGCATA  
GCTCACCTTTAGCGAGCCCTCATTAGATTCTTGCATCTTCATCAGCATGCAAAATCTTAACATATTA  
ACAAGCAGTGAGACATGGTTATCTGACCATGACCACCTCTGCATAGCGTTCACGTGTGTAGACCACAC  
+

FFFFFFFFFFFFFFFFFFFFFFFFFFF:FFFFFFFFFFFFFFFFFFFFFFFFFFFFFFFFFFFFFFFFFFFFFFFFFFFFFFFFFFFFFFFF  
@A00155:342:HHGFNDSXY:1:2271:2275:26412 2:N:0:GAACCTAG+TCCGCATA  
CTCACCTTTTCAGCGATCCCTCATTAGATTCTTG CATCTTCATCAGCATGCAAAATCTTAACATATTAA  
CAAGCAGTGAGACATGGTTATCTGACCATGACCACCTCTGCATAGCGTTCACGTGTGTAGACCACAC  
+  
FFFF:FFFFFFFF, FFFFFF:, FFFF:FFFFFFFFF:, F:FF:FF, FFFFF:FFF, FFF:FFFFFFFFF  
FFF, FF, FFFFFFFFF:FFFF:FFFFFFFFFFFFFFFFF::FFF:FFFF:FFFFFFFFFFFF:FFFFFFFF:  
@A00155:342:HHGFNDSXY:1:2468:3007:27398 2:N:0:GAACCTAG+TCCGCATA  
CTCACCTTTTCAGCGATCCCTCATTAGATTCTTG CATCTTCATCAGCATGCAAAATCTTAACATATTAA  
CAAGCAGTGAGACATGGTTATCTGACCATGACCACCTCTGCATAGCGTTCACGTGTGTAGACCACACG  
+  
FFFFF,: FFFF, FFFFFFFFF:FFFFFFFFFFFF, FF:F:F, FFF:FF:FFF, FFFFFFFFFF:FFFF:FF  
F::FF:FFF:FFFFFFFFFFFFFFFFF:FFF:FFFFFFFFFFFF:FFF, FFFFFFFFFFFFFF::FFFF::F  
@A00155:342:HHGFNDSXY:1:2628:3414:12508 1:N:0:GAACCTAG+TCCGCATA  
TCACCTTTTCAGCGATCCCTCATTAGATTCTTG CATCTTCATCAGCATGCAAAATCTTAACATATTAA  
AAGCAGTGAGACATGGTTATCTGACCATTACCACCTCTGCATAGCGTTCACGTGT  
+  
FFFFFFFFF:FFF,, FFFFFFFFFFFFFFFFFFFFFF:FF:FF:, FFFF, FFFFFFFFFFFFFFFFFFFFFF  
FF, FFF:FFFFFFFFFFFFFFFFFFFFF:FF, FF:FFFFFFFFFFFFFFFFF:FFFFFFFFF  
@A00155:342:HHGFNDSXY:1:2525:16396:12790 1:N:0:GAACCTAG+TCCGCATA  
TCACCTTTTCAGCGATCCCTCATTAGATTCTTG CATCTTCATCAGCATGCAAAATCTTAACATATTAA  
AAGCAGTGAGACATGGTTATCTGACCATGACCACCTCTGCATAGCGTTCACGTGTG  
+  
FFFFFFFFFFFFF,: FFFFFFFFFFFFFFFFFFFFFFFFFFFFFFFFFFFFFFFFFFFFFF:FFFFFFFFF  
FFFFFFFFFFFFFFFFFFFFFFFFFFFFFFFFFFFFFFFFFFFFFFFFFFFFFFFFF:FFFFFFFFF  
@A00155:342:HHGFNDSXY:1:2622:30544:17190 1:N:0:GAACCTAG+TCCGCATA  
TCACCTTTTCAGCGATCCCTCATTAGATTCTTG CATCTTCATCAGCATGCAAAATCTTAACATATTAA  
AAGCAGTGAGACATGGTTATCTGACCATGACCACCTCTGCATAGCGTTCACGTGTG  
+  
FFFFFFFFFFFFFFFFFFFFFFFFFFFFFFFFFFFFFFFFFFFFFFFFFFFF, FFFFFFFFFFFFFFFFFFFFFFFFFF  
FFFFFFFFFFFFFFFFFFFFFFFFFFFFFFFFFFFFFFFFFFFFFFFFFFFFFFFFF, FFFFFFFFFF  
@A00155:342:HHGFNDSXY:1:1319:3721:27383 1:N:0:GAACCTAG+TCCGCATA  
TCACCTTTTCAGCGATCCCTCATTAGATTCTTG CATCTTCATCAGCATGCAAAATCTTAACATATTAA  
AAGCAGTGAGACATGGTTATCTGACCATGACCACCTCTGCATAGCGTTCACGTGTGTAG  
+  
FFFFFFFFFFFFF:FFFFFFFFFFFFFFFFFFFFFFFFFFFFF:FFFFF, FF:FFFF:FFFFFFFFFFFFFFFFF  
FFFF:FFFFFFFFF:FFFFFFFFFFFFFFFFF:FFFFFFFFFFFFFFFFFFFFFFFFF, FFF,: F  
@A00155:342:HHGFNDSXY:1:2475:5674:36088 1:N:0:GAACCTAG+TCCGCATA  
TCACCTTTTCAGCGATCCCTCATTAGATTCTTG CATCTTCATCAGCATGCAAAATCTTAACATATTAA  
AAGCAGTGAGACATGGTTATCTGACCATGACCACCTCTGCATAGCGTTCACGTGTGTAGACCAC  
+  
FFFFFFFFF:FFF:FFFFFFFFFFFFFFFFF:FFFF::FFFFFFFFFFFFFFFFF:FFFFFFFF:FFFFFFF  
FFFFFFFFFFFFFFFFFFFFFFFFFFFFFFFFFFFFFFFFFFFFFFFFFFFFFFFFF:FFFFFFFFF:FFFFFFFFFFFFFFFFF:FFF  
@A00155:342:HHGFNDSXY:1:1345:25391:21449 1:N:0:GAACCTAG+TCCGCATA  
TCACCTTTTCAGCGATCCCTCATTAGATTCTTG CATCTTCATCAGCATGCAAAATCTTAACATATTAA  
AAGCAGTGAGACATGGTTATCTGACCATGACCACCTCTGCATAGCGTTCACGTGTGTAGACCAC  
+  
FFFFFFFFFFFFF:FFFFFFFFFFFFF:FF:FFFF:FFFFFFFFF, FF:FFFFFFFFFFFFFFFFF:FFFFFFF  
FFFFFFFFFFFFFFFFF:FFFFFFFFFFFFFFFFFFFFFFFFFFFFFFFFFFFFFFFFF  
@A00155:342:HHGFNDSXY:1:1278:13892:18912 1:N:0:GAACCTAG+TCCGCATA  
TCACCTTTTCAGCGATCCCTCATTAGATTCTTG CATCTTCATCAGCATGCAAAATCTTAACATATTAA  
AAGCAGTGAGACATGGTTATCTGACCATGACCACCTCTGCATAGCGTTCACGTGTGTAGACCAC

FFFFFFFFFFFFFFFF,FFFFFFFFFFFFFFFF:FFFFFFFFFFFFFFFFFFFFFFFFFFFFFFFF:FFFFFFF  
FFFFFFFFFFFFFFFFFFFFFFFFFFFFFFFFFFFFFFFFFFFFFFFFFFFFFFFFFFFFFFFFFFFFFFFFF  
@A00155:342:HHGFNDSXY:1:1154:19660:12618 1:N:0:GAACCTAG+TCCGCATA  
TCACCTTTCAGCGATCCCTCATTAGATTCTTGCATCTTCATCAGCATGCAAAATCTTAACATATTAAC  
AAGCAGTGAGACATGGTTATCTGACCATGACCACCTCTGCATAGCGTTCACGTGTGTAGACCAC  
+  
FFFFFFFFFFFFFFFFFFFFFFFFFFFFFFFFFFFFFFFFFFFFFFFFFFFFFFFFFFFFFFFFFFFFFFFFF:FFFFFFF  
FFFFFFFFFFFFFFFFFFFFFFFFFFFFFFFFFFFFFFFFFFFFFFFFFFFFFFFFFFFFFFFFFFFFFFFFF,FFFFFFF:FFFFFFF  
@A00155:342:HHGFNDSXY:1:1238:21251:17848 1:N:0:GAACCTAG+TCCGCATA  
TCACCTTTCAGCGATCCCTCATTAGATTCTTGCATCTTCATCAGCATGCAAAATCTTAACATATTAAC  
AAGCAGTGAGACATGGTTATCTGACCATGACCACCTCTGCATAGCGTTCACGTGTGTAGACCAC  
+  
FFFFFFFFFFFFFFF:FFFFFFFFFFFFFFFFFFFFFFFFFFFFFFFFFFFFFFFFFFFFFFFFFFFFFFFFF  
FFFFFFFFFFFFFFFFFFFFFFFFFFFFFFFFFFFFFFFFFFFFFFFFFFFFFFFFFFFFFFFFFFFFFFFFF:FFFF  
@A00155:342:HHGFNDSXY:1:2326:25364:31829 1:N:0:GAACCTAG+TCCGCATA  
TCACCTTTCAGCGATCCCTCATTAGATTCTTGCATCTTCATCAGCATGCAAAATCTTAACATATTAAC  
AAGCAGTGAGACATGGTTATCTGACCATGACCACCTCTGCATAGCGTTCACGTGTGTAGACCAC  
+  
FFFFFFFFFFFFFFFFFFFFFFFFFFFFFFFFFFFF,:FFFFFF,,,:FF,F:FFFFFFFF,:FF::FFFFFFFFF  
FF,FFFFFF,FFFFFFFFFFFFFF,FFFFF::F,FFFFFFFF,FFFF:FFF:F,FFFFFFFFF,,:F  
@A00155:342:HHGFNDSXY:1:1154:20157:12665 1:N:0:GAACCTAG+TCCGCATA  
TCACCTTTCAGCGATCCCTCATTAGATTCTTGCATCTTCATCAGCATGCAAAATCTTAACATATTAAC  
AAGCAGTGAGACATGGTTATCTGACCATGACCACCTCTGCATAGCGTTCACGTGTGTAGACCAC  
+  
FFFFFFFFF:FFF,:FFFFFFFFFFFFFFFFFFFFFFFFFFFFFFFF:FFFFFFFFFFFFFFFFFFFFFFFFF,FF  
FFFFFFFFFFFFFFFFFFFFFFFFFFFFFFFFFFFFFFFFFFFFFFFFFFFFFFFFFFFFFFFFFFFFFFFFF:FFFF  
@A00155:342:HHGFNDSXY:1:2269:14543:18129 2:N:0:GAACCTAG+TCCGCATA  
TCACCTTTCAGCGATCCCTCATTAGATTCTTGCATCTTCATCAGCATGCAAAATCTTAACATATTAAC  
AAGCAGTGAGACATGGTTATCTGACCATGACCACCTCTGCATAGCGTTCACGTGTGTAGACCACACGT  
+  
FFFFFFFFFFFFFFFFFFFFFFFFFFFFFFFFFFFFFFFFFFFFFFFFFFFFFFFFFFFFFFFFFFFFFFFFF:FF:FF  
FFFFFFFFFFFFFFFFFFFFFFFFFFFFFFFFFFFFFFFFFFFFFFFFFFFFFFFFFFFFFFFFFFFFFFFFF  
@A00155:342:HHGFNDSXY:1:2436:16233:17112 2:N:0:GAACCTAG+TCCGCATA  
TCACCTTTCAGCGATCCCTCATTAGATTCTTGCATCTTCATCAGCATGCAAAATCTTAACATATTAAC  
AAGCAGTGAGACATGGTTATCTGACCATGACCACCTCTGCATAGCGTTCACGTGTGTAGACCACACGT  
+  
FFFFFFFFFFFFFFFFFFFFFFFFFFFFFFFFFFFFFFFFFFFFFFFFFFFFFFFFFFFFFFFFFFFFFFFFF  
:FFFFFFFFFFFFFFFFF:FFFFFFFFFFFFFFFFFFFFFFFFFFFFFFFFFFFFFFFFFFFFFFFFFFFFF  
@A00155:342:HHGFNDSXY:1:1419:22724:7341 2:N:0:GAACCTAG+TCCGCATA  
TCACCTTTCAGCGATCCCTCATTAGATTCTTGCATCTTCATCAGCATGCAAAATCTTAACATATTAAC  
AAGCAGTGAGACATGGTTATCTGACCATGACCACCTCTGCATAGCGTTCACGTGTGTAGACCACACGT  
+  
FFFFFFFFFFFFFFFFFFFFFFFFFFFFFFFFFFFFFFFFFFFFFFFFFFFFFFFFFFFFFFFFFFFFFFFFF  
FFFFFFFFFFFFFFFFFFFF,FFFFFFFFFFFFFFFFFFFFFFFFFFFFFFFF:FFFFFFFFFFFFFFFFFFFF,FFFF  
@A00155:342:HHGFNDSXY:1:1203:6017:11945 2:N:0:GAACCTAG+TCCGCATA  
TCACCTTTCAGCGATCCCTCATTAGATTCTTGCATCTTCATCAGCATGCAAAATCTTAACATATTAAC  
AAGCAGTGAGACATGGTTATCTGACCATGACCACCTCTGCATAGCGTTCACGTGTGTAGACCACACGT  
+  
FFFFFFFFFFFFF:FFFFFFF:FFFF:FFFFFFFFFFFFFFFFFFFFFFFFFFFFFFFF:FFFFFFFFFFFFFFFFF  
F:FFFFFFFFF:FFF:FFFFFFFFFFFFFFFFFFFFFFFFFFFFFFFFFFFFFFFFFFFFFFFFFFFFF:FFFFF  
@A00155:342:HHGFNDSXY:1:1335:7012:18928 2:N:0:GAACCTAG+TCCGCATA  
CACCTTTCAGCGATCCCTCATTAGATTCTTGCATCTTCATCAGCATGCAAAATCTTAACATATTAACA  
AGCAGTGAGACATGGTTATCTGACCATGACCACCTCTGCATAGCGTTCACGTGTGTAGACCACACGT  
+

[illegible]

[illegible]

F::FFF::FFFFF,FFFF:FFFFFFFFF:,FFF:F:FFFFFFFFFFFF:FFFF,FFFFFFFFFFFF:FF  
FFFFFFFF,FFFFFFFF,FF:FF:FF:FFF,F:FFFF:FFFFFFFFFFFFFFFFFFFFFFFF:FFFFFFFF  
@A00155:342:HHGFNDSXY:1:2245:23710:10989 1:N:0:GAACCTAG+TCCGCATA  
CAGCGATCCCTCATTAGATTCTTGCATCTTCATCAGCATGCAAAATCTTAACATATTAACAAGCAGTG  
AGACATGGTTATCTGACCATGACCACCTCTGCATAGCGTTCACGTGTGTAGACCACACGTGAGTCTGT  
+  
FFFFF:,FFFFFFFFFFFFFFFFFFFFFFFFFFFFFFFFFFFFFFFFFFFFFFFFFFFFFFFFFFFFFFFF  
FFFFFFFFFFFFFFFFFFFFFFFFFFFFFFFFFFFFFFFFFFFFFFFFFFFFFFFFFFFFFFFF:FFFFFFFF  
@A00155:342:HHGFNDSXY:1:1446:9534:25895 1:N:0:GAACCTAG+TCCGCATA  
CAGCGATCCCTCATTAGATTCTTGCATCTTCATCAGCATGCAAAATCTTAACATATTAACAAGCAGTG  
AGACATGGTTATCTGACCATGACCACCTCTGCATAGCGTTCACGTGTGTAGACCACACGTGAGTCTGT  
+  
FFFFF:FFFFFFFFFFFFFFFFFFFFFFFFFFFFFFFFFFFFFFFFFFFFFFFFFFFFFFFFFFFFFFFF  
FFFFFFFFFFFFFFFFFFFFFFFFFFFFFFFFFFFFFFFFFFFFFFFFFFFFFFFFFFFFFFFF:FFFFFFFF  
@A00155:342:HHGFNDSXY:1:1630:8169:22216 1:N:0:GAACCTAG+TCCGCATA  
CAGCGATCCCTCATTAGATTCTTGCATCTTCATCAGCATGCAAAATCTTAACATATTAACAAGCAGTG  
AGACATGGTTATCTGACCATGACCACCTCTGCATAGCGTTCACGTGTGTAGACCACACGTGAGTCTGT  
+  
FFFFF:FFFFFFFFFFFFFFFFFFFFFFFFFFFFFFFFFFFFFFFFFFFFFFFFFFFFFFFFFFFFFFFF  
FFFFFFFFFFFFFFFFFFFFFFFFFFFFFFFFFFFFFFFFFFFFFFFFFFFFFFFFFFFFFFFF:FFFFFFFF  
@A00155:342:HHGFNDSXY:1:2539:29658:1376 2:N:0:GAACCTAG+TCCGCATA  
CAGCGATCCCTCATTAGATTCTTGCATCTTCATCAGCATGCAAAATCTTAACATATTAACAAGCAGTG  
AGACATGGTTATCTGACCATGACCACCTCTGCATAGCGTTCACGTGTGTAGACCACACGTGAGTCTGT  
+  
FFF,FFFFFFFFFFFFFFFFFFFFFFFFFFFFFFFFFFFFFFFFFFFFFFFFFFFFFFFFFFFFFFFF  
FFFFFFFFFFFFFFFFFFFFFFFFFFFFFFFFFFFFFFFFFFFFFFFFFFFFFFFFFFFFFFFF:FFFFFFFF  
@A00155:342:HHGFNDSXY:1:2304:6551:17472 2:N:0:GAACCTAG+TCCGCATA  
CAGCGATCCCTCATTAGATTCTTGCATCTTCATCAGCATGCAAAATCTTAACATATTAACAAGCAGTG  
AGACATGGTTATCTGACCATGACCACCTCTGCATAGCGTTCACGTGTGTAGACCACACGTGAGTCTGT  
+  
FFFFFFFFFFFF:FFFF:FFFF:FFFF:F,FFFFFFFFFFFFFFFFFFFFFFFFF,:F:F,F:FFFF:F  
FFFF:FFF,FFFFFFFFFFFFFFFFFFFFFFFFFFFFFFFFFFFFFFFF:FFFFFFFFFFFFFFFFFFFF:F  
@A00155:342:HHGFNDSXY:1:1608:24026:30984 1:N:0:GAACCTAG+TCCGCATA  
CAGCGATCCCTCATTAGATTCTTGCATCTTCATCAGCATGCAAAATCTTAACATATTAACAAGCAGTG  
AGACATGGTTATCTGACCATGACCACCTCTGCATAGCGTTCACGTGTGTAGACCACACGTGAGTCTGT  
+  
FFFFFFFFFFFF:FFFFFFFFFFFFFFFFFFFFFFFFFFFFFFFFFFFFFFFF:FFFFFFFFFFFFFFFFFFFF  
FFFFFFFFFFFFFFFFFFFFFFFFFFFFFFFFFFFFFFFFFFFFFFFFFFFFFFFFFFFFFFFF:FF  
@A00155:342:HHGFNDSXY:1:2140:31358:11334 1:N:0:GAACCTAG+TCCGCATA  
AGCGATCCCTCATTAGATTCTTGCATCTTCATCAGCATGCAAAATCTTAACATATTAACAAGCAGTGA  
GACATGGTTATCTGACCATGACCACCTCTGCATAGCGTTCACGTGTGTAGACCACACGTGAGTCTGTA  
+  
FFFF:,FFFFFFFFFFFFFFFFFFFFFFFFFFFFFFFFFFFFFFFF:FFFFFFFF:FFFFFFFFFFFFFFFF  
FFF:FFFFFFFFFFFFFFFFFFFFFFFFFFFFFFFFFFFFFFFF:FFFFFFFF:FFFF:FFFFFFFFFFFF  
@A00155:342:HHGFNDSXY:1:2344:9245:36573 1:N:0:GAACCTAG+TCCGCATA  
AGCGATCCCTCATTAGATTCTTGCATCTTCATCAGCATGCAAAATCTTAACATATTAACAAGCAGTGA  
GACATGGTTATCTGACCATGACCGCCTCTGCATAGCGTTCACGTGTGTAGACCACACGTGAGTCTGTA  
+  
FFFF:,FFFFFFFFFFFFFFFFFFFFFFFFFFFFFFFFFFFFFFFFFFFFFFFFFFFFFFFFFFFFFFFF  
FFFFFFFFFFFFFFFFFFFFFFFFFFFFFFFFFFFFFFFFFFFFFFFFFFFFFFFF,FFFFFFFF:FFFFF  
@A00155:342:HHGFNDSXY:1:1641:31222:4429 1:N:0:GAACCTAG+TCCGCATA  
AGCGATCCCTCATTAGATTCTTGCATCTTCATCAGCATGCAAAATCTTAACATATTAACAAGCAGTGA  
GACATGGTTATCTGACCATGACCACCTCTGCATAGCGTTCACGTGTGTAGACCACACGTGAGTCTGTA  
+

```

FFFFFFFFFFFFFFFFFFFFFFFFFFFFFFFFFFFFFFFF:FFFFFFFFFFFFFFFFFFFFFFFF:FFFFFFFFFFFFFFFF:FFFFFFF
FFFFFFFFFFFFFFFFFFFFFFFFFFFFFFFFFFFFFFFF:FFFFFFFFFFFFFFFFFFFFFFFF,FFFFF,FFFF,FFFFFFFFF
@A00155:342:HHGFNDSXY:1:2166:3070:26944 1:N:0:GAACCTAG+TCCGCATA
AGCGATCCCTCATTAGATTCTTGCATCTTCATCAGCATGCAAAATCTTAACATATTAACAAGCAGTGA
GACATGGTTATCTGACCATGACCACCTCTGCATAGCGTTCACGTGTGTAGACCACACGTGAGTCTGTA
+
FFFFFFFFFFFFFFFFFFFFFFFFFFFFFFFFFFFFFFFF:FFFFFFFFFFFFFFFFFFFFFFFF:FFFFFFFFFFFFFFFF
FFFFFFFFFFFFFFFFFFFFFFFFFFFFFFFFFFFFFFFF:FFFFFFFFFFFFFFFFFFFFFFFF
@A00155:342:HHGFNDSXY:1:2138:24370:16673 1:N:0:GAACCTAG+TCCGCATA
AGGGATCCCTCATTAGATTCTTGCATCTTCATCAGCATGCAAAATCTTAACATATTAACAAGCAGTGA
GACATGGTTATCTGACCATGACCACCTCTGCATAGCGTTCACGTGTGTAGACCACACGTGAGTCTGTA
+
FFFF,FFFFFFFFFFFFFFFFFFFFFFFFFFFFFFFFFFFFFFFF:FFFFFFFFFFFFFFFF
FFFFFFFFFFFFFFFFFFFFFFFFFFFFFFFFFFFFFFFF:FFFFFFFFFFFFFFFF
@A00155:342:HHGFNDSXY:1:2314:10719:9846 1:N:0:GAACCTAG+TCCGCATA
AGCGATCCCTCATTAGATTCTTGCATCTTCATCAGCATGCAAAATCTTAACATATTAACAAGCAGTGA
GACATGGTTATCTGACCATGACCACCTCTGCATAGCGTTCACGTGTGTAGACCACACGTGAGTCTGTA
+
FFFFF,FFFFFFFFFFFFFFFFFFFFFFFFFFFFFFFFFFFFFFFF:FFFFFFFFFFFFFFFF
FFFFFFFFFFFFFFFFFFFFFFFFFFFFFFFFFFFFFFFF:FFFFFFFFFFFFFFFF
@A00155:342:HHGFNDSXY:1:1571:17101:24721 1:N:0:GAACCTAG+TCCGCATA
AGCGATCCCTCATTAGATTCTTGCATCTTCATCAGCATGCAAAATCTTAACATATTAACAAGCAGTGA
GACATGGTTATCTGACCATGACCACCTCTGCATAGCGTTCACGTGTGTAGACCACACGTGAGTCTGTA
+
FF:F,FFF,FFF,:FFFFFFFFFFFFFFFFFFFFFFFF:FFFFFFF:FFFFFFFFFFFFFFFF:FFFFFFF:FF:FFF
FFFF:FFFFFFFFFFFFFFFFFFFFFFFFFFFFFFFF:FFFFFFFFFFFFFFFF:FFFFFFF:FFFFFFFF
@A00155:342:HHGFNDSXY:1:1336:15338:30561 1:N:0:GAACCTAG+TCCGCATA
AGCGATCCCTCATTAGATTCTTGCATCTTCATCAGCATGCAAAATCTTAACATATTAACAAGCAGTGA
GACATGGTTATCTGACCATGACCACCTCTGCATAGCGTTCACGTGTGTAGACCACACGTGAGTCTGTA
+
FFFFFFF:FFFFFFFFFFFFFFFFFFFFFFFFFFFFFFFFFFFFFFFFFFFFFFFFFFFFFFFFFFFFFFFF
FFFFFFFFFFFFFFFFFFFFFFFFFFFFFFFFFFFFFFFFFFFFFFFFFFFFFFFFFFFFFFFF
@A00155:342:HHGFNDSXY:1:1441:17282:36714 1:N:0:GAACCTAG+TCCGCATA
AGCGATCCCTCATTAGATTCTTGCATCTTCATCAGCATGCAAAATCTTAACATATTAACAAGCAGTGA
GACATGGTTATCTGACCATGACCACCTCTGCATAGCGTTCACGTGTGTAGACCACACGTGAGTCTGTA
+
FFFFFFFFFFFFFFFFFFFFFFFFFFFFFFFFFFFFFFFF:FFFFFFFFFFFFFFFFFFFFFFFFFFFFFFFF
FFFFFFFFFFFFFFFFFFFFFFFFFFFFFFFFFFFFFFFFFFFFFFFFFFFFFFFFFFFFFFFF,FFFFFFF:FFFF:FFFF
@A00155:342:HHGFNDSXY:1:2116:25211:27305 1:N:0:GAACCTAG+TCCGCATA
AGCGATCCCTCATTAGATTCTTGCATCTTCATCAGCATGCAAAATCTTAACATATTAACAAGCAGTGA
GACATGGTTATCTGACCATGACCACCTCTGCATAGCGTTCACGTGTGTAGACCACACGTGAGTCTGTA
+
FFFF:FFFFFFFFFFFFFFFFFFFFFFFFFFFFFFFFFFFFFFFFFFFFFFFFFFFFFFFFFFFFFFFF
FFFFFFFFFFFFFFFFFFFFFFFFFFFFFFFFFFFFFFFFFFFFFFFFFFFFFFFFFFFFFFFF
@A00155:342:HHGFNDSXY:1:1538:20283:32612 1:N:0:GAACCTAG+TCCGCATA
AGCGATCCCTCATTAGATTCTTGCATCTTCATCAGCATGCAAAATCTTAACATATTAACAAGCAGTGA
GACATGGTTATCTGACCATGACCACCTCTGCATAGCGTTCACGTGTGTAGACCACACGTGAGTCTGTA
+
FFFF,FFFFFFFFFFFFFFFFFFFFFFFFFFFFFFFFFFFFFFFFFFFFFFFFFFFFFFFFFFFFFFFF
FFFFFFFFFFFFFFFFFFFFFFFFFFFFFFFFFFFFFFFFFFFFFFFFFFFFFFFFFFFFFFFF
@A00155:342:HHGFNDSXY:1:1530:17996:16125 1:N:0:GAACCTAG+TCCGCATA
AGCGATCCCTCATTAGATTCTTGCATCTTCATCAGCATGCAAAATCTTAACATATTAACAAGCAGTGA
GACATGGTTATCTGACCATGACCACCTCTGCATAGCGTTCACGTGTGTAGACCACACGTGAGTCTGTA
+

```

FFFF:FFFFFFFFFFFFFFFFFFFFFFFF:FFFF:FFFFFFFFFFFFFFFFFFFFFFFF:FFFFFFFFFFFFFFFF  
FFFFFFFFFFFFFFFFFFFFFFFFFFFFFFFFFFFFFFFF:FFFFFFFFFFFFFFFFFFFFFFFFFFFFFFFF  
@A00155:342:HHGFNDSXY:1:1525:30156:26412 1:N:0:GAACCTAG+TCCGCATA  
AGCGATCCCTCATTAGATTCTTGCATCTTCATCAGCATGCAAAATCTTAACATATTAACAAGCAGTGA  
GACATGGTTATCTGACCATGACCACCTCTGCATAGCGTTCACGTGTGTAGACCACACGTGAGTCTGTA  
+  
FFF::FFFFFFFFFFFFFFFF:FFFFFF:FFFFFF,FFFFFFFFFFFFFFFF:FFFFFFFF,FFFF  
FFFFFFFFFFFFFFFFFFFFFFFFFFFFFFFF:FFFFFF,FFF::F,F::FFFFFFFFFFFFFFFF  
@A00155:342:HHGFNDSXY:1:2163:3188:24486 1:N:0:GAACCTAG+TCCGCATA  
AGCGATCCCTCATTAGATTCTTGCATCTTCATCAGCATGCAAAATCTTAACATATTAACAAGCAGTGA  
GACATGGTTATCTGACCATGACCACCTCTGCATAGCGTTCACGTGTGTAGACCACACGTGAGTCTGTA  
+  
FFFF,FFFFFFFFFFFFFFFFFFFFFFFF:FF:FFFFFFFF:FFFFFFFFFFFFFFFFFFFFFFFF  
FFFFFFFFFFFFFFFFFFFFFFFFFFFFFFFFFFFFFFFFFFFFFFFFFFFFFFFFFFFFFFFFFFFFFFFF  
@A00155:342:HHGFNDSXY:1:1668:20166:34726 2:N:0:GAACCTAG+TCCGCATA  
GCGATCCCTCATTAGATTCTTGCATCTTCATCAGCATGCAAAATCTTAACATATTAACAAGCAGTGA  
ACATGGTTATCTGACCATGACCACCTCTGCATAGCGTTCACGTGTGTAGACCACACGTGAGTCTGTAA  
+  
FFFFFFFFF:FFFF:FFFFFFFFFFFFFFFFFFFFFFFFFFFFFFFF:FFFFFF:FFFF:FF,F:FFFFFF  
FFFFFFFFFFFFFFFFFFFFFFFFFFFFFFFFFFFFFFFFFFFFFFFFFFFFFFFFFFFFFFFFFFFFFFFF  
@A00155:342:HHGFNDSXY:1:2216:25916:9173 2:N:0:GAACCTAG+TCCGCATA  
GCGATCCCTCATTAGATTCTTGCATCTTCATCAGCATGCAAAATCTTAACATATTAACAAGCAGTGA  
ACATGGTTATCTGACCATGACCACCTCTGCATAGCGTTCACGTGTGTAGACCACACGTGAGTCTGTAA  
+  
F:FFFFFFFFFFFFFFFFFFFFFFFFFFFFFFFF:FFFFFFFFFFFFFFFFFFFFFFFFFFFFFFFF  
FFFFFFFFFFFFFFFFFFFFFFFFFFFFFFFFFFFFFFFFFFFFFFFFFFFFFFFFFFFFFFFFFFFFFFFF  
@A00155:342:HHGFNDSXY:1:1171:7392:8594 1:N:0:GAACCTAG+TCCGCATA  
GATCCCTCATTAGATTCTTGCATCTTCATCAGCATGCAAAATCTTAACATATTAACAAGCAGTGAGAC  
ATGGTTATCTGACCATGACCACCTCTGCATAGCGTTCACGTGTGTAGACCACACGTGAGTCTGTAATC  
+  
FFFFFFFFFFFFFFFFFFFFFFFFFFFFFFFFFFFFFFFF:FFFFFFFF:FFFFFFFFFFFFFFFF  
FFFFFFFFFFFFFFFFFFFFFFFFFFFFFFFFFFFFFFFF,FFFFFFFFFFFFFFFFFFFFFFFF  
@A00155:342:HHGFNDSXY:1:2608:30327:2065 1:N:0:GAACCTAG+TCCGCATA  
GATCCCTCATTAGATTCTTGCATCTTCATCAGCATGCAAAATCTTAACATATTAACAAGCAGTGAGAC  
ATGGTTATCTGACCATGACCACCTCTGCATAGCGTTCACGTGTGTAGACCACACGTGAGTCTGTAATC  
+  
FFFFFFFFFFFFFFFFFFFFFFFFFFFFFFFFFFFFFFFFFFFFFFFFFFFFFFFFFFFFFFFFFFFFFFFF  
FFFFFFFFFFFF:FFFFFFFFFFFFFFFF:FFFFFFFFFFFFFFFFFFFFFFFFFFFFFFFF  
@A00155:342:HHGFNDSXY:1:2503:32362:7748 1:N:0:GAACCTAG+TCCGCATA  
GATCCCTCATTAGATTCTTGCATCTTCATCAGCATGCAAAATCTTAACATATTAACAAGCAGTGAGAC  
ATGGTTATCTGACCATGACCACCTCTGCATAGCGTTCACGTGTGTAGACCACACGTGAGTCTGTAATC  
+  
FF:FFFFFFFFFFFFFFFFFFFFFFFFFFFFFFFF:FFFFF::FF:FFFFFFFFFFFFFFFF,FFFFF  
FFFFFFFFFFFFFFFFFFFFFFFFFFFFFFFF:FFFFFFFFFFFFFFFF:FFFFFFFFFFFFFFFF  
@A00155:342:HHGFNDSXY:1:2473:27434:2315 2:N:0:GAACCTAG+TCCGCATA  
GATCCCTCATTAGATTCTTGCATCTTCATCAGCATGCAAAATCTTAACATATTAACAAGCAGTGAGAC  
ATGGTTATCTGACCATGACCACCTCTGCATAGCGTTCACGTGTGTAGACCACACGTGAGTCTGTAATC  
+  
FFFFFFFFFFFFFFFFFFFFFFFFFFFFFFFFFFFFFFFF:FFFFFFFFFFFFFFFF:FFFFFFFF  
FFFFFFFFFFFFFFFFFFFFFFFFFFFFFFFFFFFFFFFFFFFFFFFFFFFFFFFFFFFFFFFFFFFFFFFF  
@A00155:342:HHGFNDSXY:1:2608:30038:1846 1:N:0:GAACCTAG+TCCGCATA  
GATCCCTCATTAGATTCTTGCATCTTCATCAGCATGCAAAATCTTAACATATTAACAAGCAGTGAGAC  
ATGGTTATCTGACCATGACCACCTCTGCATAGCGTTCACGTGTGTAGACCACACGTGAGTCTGTAATC  
+



FFFFFFFFFFFFFFFFFFFFFFFF:FFFFF:F:FFFFFFFFFFFFFFFF:FFFFFFFFFFFFFFFF  
FFFFFFFFFFFFFFFFFFFFFFFF:FFFFFFFFFFFFFFFFFFFFFFFFFFFFFFFFFFFFFFFF  
@A00155:342:HHGFNDSXY:1:2247:32515:18818 1:N:0:GAACCTAG+TCCGCATA  
ATCCCTCATTAGATTCTTGCATCTTCATCAGCATGCAAAATCTTAACATATTAACAAGCAGTGAGACA  
TGGTTATCTGACCATGACCACCTCTGCATAGCGTTCACGTGTGTAGACCACACGTGAGTCTGTAATC  
+  
,FFFFFFFFF:FFFFFF,FF:FFF:FFF:FFF::FFFFF,FFFFFF:FFFFFFFFFFFFFFFF:  
FFFFFFFFFFFFFFFFFFFFFFFFFFFFFFFFFFFFFFFF:FFFFFFFFFFFFFFFF:FFFFFF:FFF  
@A00155:342:HHGFNDSXY:1:2528:8305:20353 2:N:0:GAACCTAG+TCCGCATA  
ATCCCTCATTAGATTCTTGCATCTTCATCAGCATGCAAAATCTTAACATATTAACAAGCAGTGAGACA  
TGGTTATCTGACCATGACCACCTCTGCATAGCGTTCACGTGTGTAGACCACACGTGAGTCTGTAATCC  
+  
FFFFFFFF:FFFFFFFFFFFF,FFFFFFFFF:FFFFFFF,FFFFFFFF:FFFFFFFFFFFFFFFF  
FFFFFFFFFFFFFFFFFFFFFFFFFFFFFFFFFFFFFFFFFFFFFFFFFFFFFFFFFFFFFFFF  
@A00155:342:HHGFNDSXY:1:1635:12400:11099 1:N:0:GAACCTAG+TCCGCATA  
ATCCCTCATTAGATTCTTGCATCTTCATCAGCATGCAAAATCTTAACATATTAACAAGCAGTGAGACA  
TGGTTATCTGACCATGACCACCTCTGCATAGCGTTCACGTGTGTAGACCACACGTGAGTCTGTAATCC  
+  
FFFFF:FFF:FFFF:FFFFFFFF:FFFFFFFFFFFFFFFFFFFFFFFFFFFFFFFF:FFFFFF:FFFFFF  
FFFFFFFFFFFFFFFFFFFFFFFFFFFFFFFFFFFFFFFFFFFFFFFFFFFFFFFFFFFFFFFF  
@A00155:342:HHGFNDSXY:1:2519:5050:20885 1:N:0:GAACCTAG+TCCGCATA  
TCCCTCATTAGATTCTTGCATCTTCATCAGCATGCAAAATCTTAACATATTAACAAGCAGTGAGAAAT  
GGTTATCTGACCATGACCACCTCTGCATAGCGTTCACGTGTGTAGACCACACGTGAGTCTGTAATCC  
+  
FFFFFFFFFFFFFFFFFFFFFFFFFFFFFFFFFFFFFFFF:FFFFFF:FFFFFF:FFF:FFFF:F,FF  
,FFFF,FF:F,FF:FF:FFFFFFFFFFFFFFFF:FF:FFFFFFFFFFFFFFFF,F:F::FF,FFFF  
@A00155:342:HHGFNDSXY:1:1165:9046:27868 1:N:0:GAACCTAG+TCCGCATA  
TCCCTCATTAGATTCTTGCATCTTCATCAGCATGCAAAATCTTAACATATTAACAAGCAGTGAGACAT  
GGTTATCTGACCATGACCACCTCTGCATAGCGTTCACGTGTGTAGACCACACGTGAGTCTGTAATCCT  
+  
FFFFFFFFFFFFFFFFFFFFFFFF,FFFF::FFFF:FF:FFFFFFFF:FFFFFFFFFFFFFFFF  
FFFFFFFFFFFFFFFFFFFFFFFFFFFFFFFF:FFF:FFFF::FFFFFFFFFFFFFFFF  
@A00155:342:HHGFNDSXY:1:1110:10230:30389 2:N:0:GAACCTAG+TCCGCATA  
TCCCTCATTAGATTCTTGCATCTTCATCAGCATGCAAAATCTTAACATATTAACAAGCAGTGAGACAT  
GGTTATCTGACCATGACCACCTCTGCATAGCGTTCACGTGTGTAGACCACACGTGAGTCTGTAATCCT  
+  
FFFFFFFFFFFFFFFFFFFFFFFF:FFFFFFFFFFFFFFFFFFFFFFFFFFFFFFFF:FFFFFFFF  
FFFFFFFFF,FFFFFFFFFFFFFFFFFFFFFFFFFFFFFFFF:FFFFFFFFFFFFFFFF  
@A00155:342:HHGFNDSXY:1:1355:18222:19460 1:N:0:GAACCTAG+TCCGCATA  
TCCCTCATTAGATTCTTGCATCTTCATCAGCATGCAAAATCTTAACATATTAACAAGCAGTGAGACAT  
GGTTATCTGACCATGACCACCTCTGCATAGCGTTCACGTGTGTAGACCACACGTGAGTCTGTAATCCT  
+  
FFFFFFFFFFFFFFFFFFFFFFFFFFFFFFFF:FFFFFF:FFFFFFFFFFFFFFFFFFFFFFFF  
:FFFFFFFFFFFFFFFFFFFFFFFFFFFFFFFFFFFFFFFFFFFFFFFFFFFFFFFFFFFFFFFF  
@A00155:342:HHGFNDSXY:1:2239:6370:21543 1:N:0:GAACCTAG+TCCGCATA  
TCCCTCATTAGATTCTTGCATCTTCATCAGCATGCAAAATCTTAACATATTAACAAGCAGTGAGACAT  
GGTTATCTGACCATGACCACCTCTGCATAGCGTTCACGTGTGTAGACCACACGTGAGTCTGTAATCCT  
+  
FFFFFFFFFFFFFFFFFFFFFFFFFFFFFFFF:FFFFFFFFF:FFFFFFFFFFFFFFFFFFFFFFFF  
:FFFFFFFFFFFF:FFF,FFFFFFFFF:F:FFFFF:F:FFFFFFFF,FFFFFFFFFFFF,FF  
@A00155:342:HHGFNDSXY:1:2473:27434:2315 1:N:0:GAACCTAG+TCCGCATA  
TCCCTCATTAGATTCTTGCATCTTCATCAGCATGCAAAATCTTAACATATTAACAAGCAGTGAGACAT  
GGTTATCTGACCATGACCACCTCTGCATAGCGTTCACGTGTGTAGACCACACGTGAGTCTGTAATCCT  
+

```
,FFFFFFFFFFFFFFFFFFFFFFFFFFFFFFFFFFFFFFFFFFFFFFFFFFFFFFFFFFFFFFFFFFFFF  
FFFFFFFFFFFFFFFFFFFFFFFFFFFFFFFFFFFFFFFFFFFFFFFFFFFFFFFFFFFFFFFFFFFFFFF  
@A00155:342:HHGFNDSXY:1:2656:15194:31908 2:N:0:GAACCTAG+TCCGCATA  
CCCTCATTAGATTCTTGATCTTCATCAGCATGCAAAATCTTAACATATTAACAAGCAGTGAGACATG  
GTTATCTGACCATGACCACCTCTGCATAGCGTTCACGTGTGTAGACCACACGTGAGTCTGTAATCCTG  
+  
FFFFFFFFFFFFFFFFFFFFFFFFFFFFFFFFFFFFFFFFFFFFFFFFFFFFFFFFFFFFFFFFFFFFF  
FFFFFFFFFFFFFFFFFFFFFFFFFFFFFFFFFFFFFFFFFFFFFFFFFFFFFFFFFFFFFFFFFFFFFFF  
@A00155:342:HHGFNDSXY:1:2475:5674:36088 2:N:0:GAACCTAG+TCCGCATA  
CCTCATTAGATTCTTGATCTTCATCAGCATGCAAAATCTTAACATATTAACAAGCAGTGAGACATGG  
TTATCTGACCATGACCACCTCTGCATAGCGTTCACGTGTGTAGACCACACGTGAGTCTGTAATCCTGC  
+  
FFFF:FFFF,FF,FFFF:FFFFFFFFFFFFFFFFFFFFFFFFFFFFFFFFFFFFFFFFFFFFFFFFF  
FFFFFFFFFFFFFFFFFFFFFFFFFFFFFFFFFFFFFFFFFFFFFFFFFFFFFFFFFFFFFFFFFFFFFFF  
@A00155:342:HHGFNDSXY:1:1529:13268:18521 1:N:0:GAACCTAG+TCCGCATA  
CCTCATTAGATTCTTGATCTTCATCAGCATGCAAAATCTTAACATATTAACAAGCAGTGAGACATGG  
TTATCTGACCATGACCACCTCTGCATAGCGTTCACGTGTGTAGACCACACGTGAGTCTGTAATCCTGC  
+  
FFFFFFFFFFFFFFFFFFFFFFFFFFFFFFFFFFFFFFFFFFFFFFFFFFFFFFFFFFFFFFFFFFFFF  
FFFFFFFFFFFFFFFFFFFFFFFFFFFFFFFFFFFFFFFFFFFFFFFFFFFFFFFFFFFFFFFFFFFFFFF  
@A00155:342:HHGFNDSXY:1:1111:10384:32690 2:N:0:GAACCTAG+TCCGCATA  
CTCATTAGATTCTTGATCTTCATCAGCATGCAAAATCTTAACATATTAACAAGCAGTGAGACATGGT  
TATCTGACCATGACCACCTCTGCATAGCGTTCACGTGTGTAGACCACACGTGAGTCTGTAATCCTGCT  
+  
FFF,FFFFFFFF:FFFF:FFFFFFFFFFFFFFFFFFFFFFFFFFFFFFFFFFFFFFFFFFFFFFFFF  
FFFFFFFFFFFFFFFFFFFFFFFFFFFFFFFFFFFFFFFFFFFFFFFFFFFFFFFFFFFFFFFFFFFFFFF  
@A00155:342:HHGFNDSXY:1:1623:18394:4319 1:N:0:GAACCTAG+TCCGCATA  
TCATTAGATTCTTGATCTTCATCAGCATGCAAAATCTTAACATATTAACAAGCAGTGAGACATGGTT  
ATCTGACCATGACCACCTCTGCATAGCGTTCACGTGTGTAGACCACACGTGAGTCTGTAA  
+  
FFFFFFF,FFF:FFFFFFFFFFFFFFFFFFFFFFFFFFFFFFFFFFFFFFFFFFFFFFFFFFFFFFF  
FFFFFFFFFFFFFFFFFFFFFFFFFFFFFFFFFFFFFFFFFFFFFFFFFFFFFFFFFFFFFFFFFFFFFFF  
@A00155:342:HHGFNDSXY:1:2656:15194:31908 1:N:0:GAACCTAG+TCCGCATA  
TCATTAGATTCTTGATCTTCATCAGCATGCAAAATCTTAACATATTAACAAGCAGTGAGACATGGTT  
ATCTGACCATGACCACCTCTGCATAGCGTTCACGTGTGTAGACCACACGTGAGTCTGTAA  
+  
FFF::F:FFFFFFFFFFFFFFFFFFFFFFFFFFFFFFFFFFFFFFFFFFFFFFFFFFFFFFFFFFFFF  
F:FFFFFFFF:FFFF:F:FFFF,F:FF,FFFF,FFFFFFFFF:FFFF,F:FFFF::FFF  
@A00155:342:HHGFNDSXY:1:2428:27127:29622 1:N:0:GAACCTAG+TCCGCATA  
TCATTAGATTCTTGATCTTCATCAGCATGCAAAATCTTAACATATTAACAAGCAGTGAGACATGGTT  
ATCTGACCATGACCACCTCTGCATAGCGTTCACGTGTGTAGACCACACGTGAGTCTGTAA  
+  
FFFFFFFFFFFFFFFFFFFFFFFFFFFFFFFFFFFFFFFFFFFFFFFFFFFFFFFFFFFFFFFFFFFFF  
:FFFFFF:FFFFFFFFFFFFFFFFFFFFFFFFFFFFFFFFFFFFFFFFFFFFFFFFFFFFFFFFFFFFF  
@A00155:342:HHGFNDSXY:1:1239:1533:11537 2:N:0:GAACCTAG+TCCGCATA  
TCATTAGATTCTTGATCTTCATCAGCATGCAAAATCTTAACATATTAACAAGCAGTGAGACATGGTT  
ATCTGACCATGACCACCTCTGCATAGCGTTCACGTGTGTAGACCACACGTGAGTCTGTAATCCTGCTG  
+  
FFFFFF:FFFF,FF:F,FFFFFFFFFFFFFFFFFFFFFFFFFFFFFFFFFFFFFFFFFFFFFFFFFFFFF  
FFFFFFFFFFFFFFFFFFFFFFFFFFFFFFFFFFFFFFFFFFFFFFFFFFFFFFFFFFFFFFFFFFFFFFF  
@A00155:342:HHGFNDSXY:1:1239:1823:15107 2:N:0:GAACCTAG+TCCGCATA  
TCATTAGATTCTTGATCTTCATCAGCATGCAAAATCTTAACATATTAACAAGCAGTGAGACATGGTT  
ATCTGACCATGACCACCTCTGCATAGCGTTCACGTGTGTAGACCACACGTGAGTCTGTAATCCTGCTG  
+
```

FF::FFFFFFFFFFFF:FFF,FFFFFFFFFFFFFFFFFFFFFFFFFFFFFFFFFFFFFFFF:FFFF:FFFFFFFFFFFF  
FFFFFFFFFFFFFFFFFFFFFFFFFFFFFFFFFFFFFFFFFFFFFFFFFFFFFFFFFFFFFFFFFFFFFFFFFFFFFFFF  
@A00155:342:HHGFNDSXY:1:2416:15899:34757 2:N:0:GAACCTAG+TCCGCATA  
CATGAGATTCTTGCATCTTCATCAGCATGCAAAATCTTAACATATTAACAAGCAGTGAGACATGGTTA  
TCTGACCATGACCACCTCTGCATAGCGTTCACGTGTGTAGACCACACGTGAGTCTGTAATCCTGCTG  
+  
FFF,FFFFFF,FFFFFFFFFF:FFFFF,FFFFFFFFFFFF:FFFFFFF:,F:,FFFFFFFFFFFF:FFFFFFF  
FFFFFFFFFF:FFFFFFFFFFFFFFFFFFFFFFFFFFFFFFFFFFFFFFFFFFFFFFFFFFFFFFFFFFFFFFFFFFFF:FFFF  
@A00155:342:HHGFNDSXY:1:2357:6831:10755 2:N:0:GAACCTAG+TCCGCATA  
CATTAGATTCTTGCATCTTCATCAGCATGCAAAATCTTAACATATTAACAAGCAGTGAGACATGGTTA  
TCTGACCATGACCACCTCTGCATAGCGTTCACGTGTGTAGACCACACGTGAGTCTGTAATCCTGCTGT  
+  
FFFFFFFFFFFFF:FFF:FFFFF:FF::FFFFFFFFFFFF:FFFFFFFFFFFF:FF,:FFFFFFFFFFFFFFFF  
FFFFFFFFFFFFFFFFFFFFFFFFFFFFFFFFFFFFFFFFFFFFFFFFFFFFFFFFFFFFFFFFFFFFFFFFFFFFF  
@A00155:342:HHGFNDSXY:1:1157:22318:20196 2:N:0:GAACCTAG+TCCGCATA  
CATTAGATTCTTGCATCTTCATCAGCATGCAAAATCTTAACATATTAACAAGCAGTGAGACATGGTTA  
TCTGACCATGACCACCTCTGCATAGCGTTCACGTGTGTAGACCACACGTGAGTCTGTAATCCTGCTGT  
+  
FFFFFFFFFFFFFFFFFFFFFFFFFFFFFFFFFFFFFFFFFFFFFFFFFFFF:FFFFFF:FFFFFFFFFFFFFFFFFFFF  
FFFFFFFFFFFFFFFFFFFFFFFFFFFFFFFFFFFFFFFFFFFFFFFFFFFFFFFFFFFFFFFFFFFFFFFFFFFFF  
@A00155:342:HHGFNDSXY:1:1357:6126:14575 2:N:0:GAACCTAG+TCCGCATA  
CATTAGATTCTTGCATCTTCATCAGCATGCAAAATCTTAACATATTAACAAGCAGTGAGACATGGTTA  
TCTGACCATGACCACCTCTGCATAGCGTTCACGTGTGTAGACCACACGTGAGTCTGTAATCCTGCTGT  
+  
FFFFFFFFFFFFFFFFFFFFFFFFFFFF:FFFFFFFFFFFFFFFFFFFFFFFFFFFF,,F,FF::,F:FFFFFFFFFFFFF  
FFFFFFFFFFFFFFFFFFFFFFFFFFFF:FFFFFFFFFFFFFFFFFFFFFFFFFFFFFFFFFFFFFFFFFFFFFFFFFFFF  
@A00155:342:HHGFNDSXY:1:2371:5122:3223 1:N:0:GAACCTAG+TCCGCATA  
CATTAGATTCTTGCATCTTCATCAGCATGCAAAATCTTAACATATTAACAAGCAGTGAGACATGGTTA  
TCTGACCATGACCACCTCTGCATAGCGTTCACGTGTGTAGACCACACGTGAGTCTGTAATCCTGCTGT  
+  
FFFFFFFFFFFFFFFFFFFFFFFFFFFF:FFFFFFFFFF:FFFFFFFFFF:FFFFFFFFFF:FFFFFFFFFFFFFFFFFFFF  
FFF:FFFF:FFFFFFFFFFFF:FFFFF,FFFFFFFFFFFF:FFF:FFFFF:FFFF,FFFF:F:FFFFF  
@A00155:342:HHGFNDSXY:1:2131:1054:11960 2:N:0:GAACCTAG+TCCGCATA  
CAATAGATTCTTGCATCTTCATCAGCATGCAAAATCTTAACATATTAACAAGCAGTGAGACATGGTTA  
TCTGACCATGACCACCTCTGCATAGCGTTCACGTGTGTAGACCACACGTGAGTCTGTAATCCTGCTGT  
+  
FF,FF:FFFFF,:FFFFF,FF,FF:FF:FFFFFFFF,FFFFFFFFF::FFF:F,FFF,FFFFFFFFFFFFF  
:FF:FFFFFFFFFFFFF,F:FF:FFFFFFFFFFFFFFFFFFFFFFFFFFFFFFFFFFFFFFFFFFFF:FFFFFFFFFFFFF:FFFFF  
@A00155:342:HHGFNDSXY:1:1371:26955:32362 2:N:0:GAACCTAG+TCCGCATA  
CATTAGATTCTTGCATCTTCATCAGCATGCAAAATCTTAACATATTAACAAGCAGTGAGACATGGTTA  
TCTGACCATGACCACCTCTGCATAGCGTTCACGTGTGTAGACCACACGTGAGTCTGTAATCCTGCTGT  
+  
FF:F::F,FFFFFFFFF:F:FFFFFFFFFFFFFFFFFFFF:FFFFFFFFFFFFFFFFFFFFFFFFFFFFFFFFFFFFF  
FFFFFFFFFFFFFFFFFFFFFFFFFFFF:FFFFFFFFFFFFFFFFFFFFFFFFFFFFFFFFFFFFFFFFFFFFFFFFFFFF:  
@A00155:342:HHGFNDSXY:1:2609:6298:29027 2:N:0:GAACCTAG+TCCGCATA  
ATTAGATTCTTGCATCTTCATCAGCATGCAAAATCTTAACATATTAACAAGCAGTGAGACATGGTTAT  
CTGACCATGACCACCTCTGCATAGCGTTCACGTGTGTATACCACACGTGAGTCTGTAATCCT  
+  
FFFFFFFFFFFFF:,,FFFF,FF:F:F:FF::FFFFFFFFFFFF:FF:FFFFF,,,FFFFFFFFF::FF:FFFF:  
FFFF::,F,FFFF:FF:F::FFFFF:FFFF:FFFF:FF,FF:F:,FFFFFFFF:FFFFFFFFF  
@A00155:342:HHGFNDSXY:1:1530:17996:16125 2:N:0:GAACCTAG+TCCGCATA  
AGATTCTTGCATCTTCATCAGCATGCAAAATCTTAACATATTAACAAGCAGTGAGACATGGTTATCTG  
ACCATGACCACCTCTGCATAGCGTTCACGTGTGTAGACCACACGTGAGTCTGTAATCCTGCTGTCTGC  
+

FFFFFFFF:FFFFFFFFFFFFFFFFFFFFFFFFFFFFFFFFFFFFFFFFFFFFFFFFFFFFFFFFFFFFFFFF  
F:FFFFFFFFFFFFFFFFFFFFFFFFFFFFFFFFFFFFFFFFFFFFFFFFFFFFFFFFFFFFFFFFFFFFFFFF  
@A00155:342:HHGFNDSXY:1:1571:17101:24721 2:N:0:GAACCTAG+TCCGCATA  
AGATTCTTGCATCTTCATCAGCATGCAAAATCTTAACATATTAACAAGCAGTGAGACATGGTTATCTG  
ACCATGACCACCTCTGCATAGCGTTCACGTGTGTAGACCACACGTGAGTCTGTAATCCTGCTGTCTGC  
+  
FFFFFFFFFF:FF:FFFFFFFFF:FFFFFFFFFFFFFFFFFFFFFFFFFFFFFFFFFFFFFFFFFFFFFFFF  
FFFFFFFFFFFF:FFFFFFF:FFFFFFFFFFFF:F:FFFFFFFFFFFFFFFFFFFFFFFFFFFFFFFFFFFF  
@A00155:342:HHGFNDSXY:1:2543:31946:8437 2:N:0:GAACCTAG+TCCGCATA  
TTCTTGCATCTTCATCAGCATGCAAAATCTTAACATATTAACAAGCAGTGAGACATGGTTATCTGACC  
ATGACCACCTCTGCATAGCGTTCACGTGTGTAGACCACACGTGAGTCTGTAATCCTGCTGTCTGCTTA  
+  
FFF:FFFFFF:FFFFFFFFFFFFFFFFFFFF:FFFFFFFFF:FFFFF:,FFFFFFFFFFFFFFFFFFFFFFF  
FFFFFFF,FFFFFFFFF:FFFFFFFFFFFFFFFFFFFF:FF:FFFFFFFFFFFFFFFFFFFFFFFF:FFFFFFF  
@A00155:342:HHGFNDSXY:1:2367:13386:22169 1:N:0:GAACCTAG+TCCGCATA  
CTTGCATCTTCATCAGCATGCAAAATCTTAACATATTAACAAGCAGTGAGACATGGTTATCTGACCAT  
GACCACCTCTGCATAGCGTTCACGTGTGTAGACCACACGTGAGTCTGTAATCCTGCTGTCTGCTTAAG  
+  
FFFFFFFFFFFFFFFFFFFFFFFFFFFFFFFFFFFFFFFFFFFFFFFFFFFFFFFFFFFFFFFFFFFFFFFF  
FFFFFFFFFFFFFFFFFFFFFFFFFFFFFFFFFFFFFFFFFFFFFFFFFFFFFFFFFFFFFFFFFFFFFFFF  
@A00155:342:HHGFNDSXY:1:2552:10917:19085 1:N:0:GAACCTAG+TCCGCATA  
CTTGCATCTTCATCAGCATGCAAAATCTTAACATATTAACAAGCAGTGAGACATGGTTATCTGACCAT  
GACCACCTCTGCATAGCGTTCACGTGTGTAGACCACACGTGAGTCTGTAATCCTGCTGTCTGCTTAAG  
+  
FFFFFFFFFFFFFFFFFFFFFFFFFFFFFFFFFFFF:FFFFFFFFFFFFFFFFFFFFFFFFFFFFFFFFFFFF  
FFFFFFFFFFFFFFFFFFFFFFFFFFFFFFFFFFFFFFFFFFFFFFFFFFFFFFFFFFFFFFFFFFFFFFFF  
@A00155:342:HHGFNDSXY:1:1533:6117:26804 1:N:0:GAACCTAG+TCCGCATA  
TTGCATCTTCATCAGCATGCAAAATCTTAACATATTAACAAGCAGTGAGACATGGTTATCTGACCATG  
ACCACCTCTGCATAGCGTTCACGTGTGTAGACCACACGTGAGTCTGTAATCCTGCTGTCTGCTTAAGA  
+  
FFFFFFFFFFFFFFFFFFFFFFFFFFFFFFFFFFFF:FFFFFFFFF:FFFFFFFFFFFFFFFFFFFFFFFF  
FFFFFFFFFFFFFFFFFFFFFFFFFFFF:FFFFFFFFFFFFFFFFFFFFFFFFFFFFFFFFFFFFFFFFFFFF  
@A00155:342:HHGFNDSXY:1:2533:6705:17926 1:N:0:GAACCTAG+TCCGCATA  
TTGCATCTTCATCAGCATGCAAAATCTTAACATATTAACAAGCAGTGAGACATGGTTATCTGACCATG  
ACCACCTCTGCATAGCGTTCACGTGTGTAGACCACACGTGAGTCTGTAATCCTGCTGTCTGCTTAAGA  
+  
FFFFFFFFFFFFFFFFFFFFFFFFFFFFFFFFFFFF:FFFFFFFFFFFFFFFFFFFFFFFFFFFFFFFFFFFF  
FFFFFFFFFFFFFFFFFFFFFFFFFFFFFFFFFFFF:FFFFFFFFFFFFFFFFFFFF,FFFFFFFFFFFFFFFF  
@A00155:342:HHGFNDSXY:1:1268:14733:16799 1:N:0:GAACCTAG+TCCGCATA  
TTGCATCTTCATCAGCATGCAAAATCTTAACATATTAACAAGCAGTGAGACATGGTTATCTGACCATG  
ACCACCTCTGCATAGCGTTCACGTGTGTAGACCACACGTGAGTCTGTAATCCTGCTGTCTGCTTAAGA  
+  
FFFFFFFFFFFFFFFFFFFFFFFFFFFFFFFFFFFF:FFFFFFFFFFFFFFFFFFFFFFFFFFFFFFFFFFFF  
FFFFFFFFFFFFFFFFFFFFFFFFFFFFFFFFFFFF,FFFFFFFFFFFFFFFFFFFFFFFFFFFFFFFFFFFF:  
@A00155:342:HHGFNDSXY:1:2453:25852:24909 1:N:0:GAACCTAG+TCCGCATA  
TGCATCTTCATCAGCATGCAAAATCTTAACATATTAACAAGCAGTGAGACATGGTTATCTGACCATGA  
CCACCTCTGCATAGCGTTCACGTGTGTAGACCACACGTGAGTCTGTAATCCTGCTGTCTGCTTAAGAG  
+  
FFFFFFFFFFFFFFFFFFFFFFFFFFFFFFFFFFFF:FFFFFFFFF:FFFFFFFFFFFFFFFFFFFFFFFF  
FFFFFFFFFFFFF:FFFFFFFFF:FFFFFFFFFFFFFFFFFFFFFFFFFFFFFFFFFFFFFFFFFFFFF  
@A00155:342:HHGFNDSXY:1:2246:13865:2362 1:N:0:GAACCTAG+TCCGCATA  
TGCATCTTCATCAGCATGCAAAATCTTAACATATTAACAAGCAGTGAGACATGGTTATCTGACCATGA  
CCACCTCTGCATAGCGTTCACGTGTGTAGACCACACGTGAGTCTGTAATCCTGCTGTCTGCTTAAGAG  
+

FFFFFFFFFFFFFFFFFFFFFFFFFFFFFFFFFFFFFFFFFFFFFFFFFFFFFFFFFFFFFFFFFFFFFFFF  
FFFFFFFFFFFFFFFFFFFFFFFFFFFFFFFFFFFFFFFFFFFFFFFFFFFFFFFFFFFFFFFFFFFFFFFF  
@A00155:342:HHGFNDSXY:1:2246:14507:5259 1:N:0:GAACCTAG+TCCGCATA  
TGCATCTTCATCAGCATGCAAAATCTTAACATATTAACAAGCAGTGAGACATGGTTATCTGACCATGA  
CCACCTCTGCATAGCGTTCACGTGTGTAGACCACACGTGAGTCTGTAATCCTGCTGTCTGCTTAAGAG  
+  
FFF:FFFFFFFFFFFFFFFFFFFFFFFFFFFFFFFFFFFFFFFFFFFFFFFFFFFFFFFFFFFFFFFFFFFF  
FFFFFFFFFFFFFFFFFFFFFFFFFFFFFFFFFFFFFFFFFFFFFFFFFFFFFFFFFFFFFFFFFFFFFFFF  
@A00155:342:HHGFNDSXY:1:2609:17463:26443 1:N:0:GAACCTAG+TCCGCATA  
TGCATCTTCATCAGCATGCAAAATCTTAACATATTAACAAGCAGTGAGACATGGTTATCTGACCATGA  
CCACCTCTGCATAGCGTTCACGTGTGTAGACCACACGTGAGTCTGTAATCCTGCTGTCTGCTTAAGAG  
+  
FFFFFFFFFFFFFFFFFFFFFFFFFFFFFFFFFFFFFFFFFFFFFFFFFFFFFFFFFFFFFFFFFFFFFFFF:  
FFFFFFFFFFFFFFFFFFFFFFFFFFFFFFFFFFFFFFFFFFFFFFFFFFFFFFFFFFFFFFFFFFFFFFFF  
@A00155:342:HHGFNDSXY:1:2578:26069:28479 1:N:0:GAACCTAG+TCCGCATA  
TGCATCTTCATCAGCATGCAAAATCTTAACATATTAACAAGCAGTGAGACATGGTTATCTGACCATGA  
CCACCTCTGCATAGCGTTCACGTGTGTAGACCACACGTGAGTCTGTAATCCTGCTGTCTGCTTAAGAG  
+  
FFFFFFFFFFFFFFFFFFFFFFFFFFFFFFFFFFFFFFFFFFFFFFFFFFFFFFFFFFFFFFFFFFFFFFFF:  
FFFFFFFFFFFFFFFFFFFFFFFFFFFFFFFFFFFFFFFFFFFFFFFFFFFFFFFFFFFFFFFFFFFFFFFF  
@A00155:342:HHGFNDSXY:1:1441:17644:1485 1:N:0:GAACCTAG+TCCGCATA  
TGCATCTTCATCAGCATGCAAAATCTTAACATATTAACAAGCAGTGAGACATGGTTATCTGACCATGA  
CCACCTCTGCATAGCGTTCACGTGTGTAGACCACACGTGAGTCTGTAATCCTGCTGTCTGCTTAAGAG  
+  
FFF:FFFFF,FF,FFFFFFFFFFFFFFFFFFFFFFFFFFFFFFFFFFFFFFFFFFFFFFFFFFFFFFFFFFFF  
FFFFFFFFFFFFFFFFFFFFFFFFFFFFFFFFFFFFFFFFFFFFFFFFFFFFFFFFFFFFFFFFFFFFFFFF  
@A00155:342:HHGFNDSXY:1:1678:23484:34053 1:N:0:GAACCTAG+TCCGCATA  
GCATCTTCATCAGCATGCAAAATCTTAACATATTAACAAGCAGTGAGACATGGTTATCTGACCATGAC  
CACCTCTGCATAGCGTTCACGTGTGTAGACCACACGTGAGTCTGTAATCCTGCTGTCTGCTTAAGAGC  
+  
FF:FFFFFFFF,FFF:FFFF:F,FFFFFF:FFFFFFFFFFFFFFFFFFFFFFFFFFFFFFFF,FFFFFFFFFFFF  
FFFFFFFFFFFFFFFFFFFFFFFFFFFFFFFFFFFFFFFFFFFFFFFFFFFFFFFFFFFFFFFFFFFFFFFF  
@A00155:342:HHGFNDSXY:1:2543:31946:8437 1:N:0:GAACCTAG+TCCGCATA  
GCATCTTCATCAGCATGCAAAATCTTAACATATTAACAAGCAGTGAGACATGGTTATCTGACCATGAC  
CACCTCTGCATAGCGTTCACGTGTGTAGACCACACGTGAGTCTGTAATCCTGCTGTCTGCTTAAGAGC  
+  
FF:,FF:FF,F,FFFFFFFF:FFFFFF:FFFFFFFFFFFF,FFFFFF:FFFFFFFFFFFFFFFFFFFF  
FFFFFFFFFFFFFFFFFFFFFFFFFFFFFFFFFFFFFFFFFFFFFFFFFFFFFFFFFFFFFFFFFFFFFFFF  
@A00155:342:HHGFNDSXY:1:2112:25771:14497 1:N:0:GAACCTAG+TCCGCATA  
GCATCTTCATCAGCATGCAAAATCTTAACATATTAACAAGCAGTGAGACATGGTTATCTGACCATGAC  
CACCTCTGCATAGCGTTCACGTGTGTAGACCACACGTGAGTCTGTAATCCTGCTGTCTGCTTAAGAGC  
+  
FFFFFFFFFFFFFFFFFFFFFFFFFFFFFFFFFFFFFFFFFFFFFFFFFFFFFFFFFFFFFFFFFFFFFFFF  
FFFFFFFFFFFFFFFFFFFFFFFFFFFFFFFFFFFFFFFFFFFFFFFFFFFFFFFFFFFFFFFFFFFFFFFF  
@A00155:342:HHGFNDSXY:1:2171:20428:27195 1:N:0:GAACCTAG+TCCGCATA  
GCATCTTCATCAGCATGCAAAATCTTAACATATTAACAAGCAGTGAGACATGGTTATCTGACCATGAC  
CACCTCTGCATAGCGTTCACGTGTGTAGACCACACGTGAGTCTGTAATCCTGCTGTCTGCTTAAGAGC  
+  
FFFFFFFFFFFFFFFFFFFFFFFFFFFFFFFFFFFFFFFFFFFFFFFFFFFFFFFFFFFFFFFFFFFFFFFF  
FFFFFFFFFFFFFFFFFFFFFFFFFFFFFFFFFFFFFFFFFFFFFFFFFFFFFFFFFFFFFFFFFFFFFFFF  
@A00155:342:HHGFNDSXY:1:1111:10384:32690 1:N:0:GAACCTAG+TCCGCATA  
GCATCTTCATCAGCATGCAAAATCTTAACATATTAACAAGCAGTGAGACATGGTTATCTGACCATGAC  
CACCTCTGCATAGCGTTCACGTGTGTAGACCACACGTGAGTCTGTAATCCTGCTGTCTGCTTAAGAGC  
+

FFFFFFFFFFFFFFFF:FFFFFFFFFFFFFFFF:FFFF,FFFF:FFFF,F::FFFF:FFF:FFFFFFFFFFFF,FF:F  
FFFF,F:FFFFFFFFFFFFFFFFFFFFFFFFFFFFFFFFFFFFFFFF:FFFFF:FFF:FFFFFFFF:F:FFFF  
@A00155:342:HHGFNDSXY:1:2430:26178:30577 1:N:0:GAACCTAG+TCCGCATA  
GCATCTTCATCAGCATGCAAAATCTTAACATATTAACAAGCAGTGAGACATGGTTATCTGACCATGAC  
CACCTCTGCATAGCGTTCACGTGTGTAGACCACACGTGAGTCTGTAATCCTGCTGTCTGCTTAAGAGC  
+  
FFFFFFFFFFFF,FFFFFFFFFFFFFFFFFFFFFFFFFFFFFFFFFFFFFFFFFFFFFFFFFFFFFFFF  
FFFFFFFFFFFFFFFFFFFFFFFFFFFFFFFF:FFFFFFFFF:FFFFFFFFFFFFFFFFFFFFFFFF:FFFFFFF  
@A00155:342:HHGFNDSXY:1:1103:12518:1344 1:N:0:GAACCTAG+TCCGCATA  
GCATCTTCATCAGCATGCAAAATCTTAACATATTAACAAGCAGTGAGACATGGTTATCTGACCATGAC  
CACCTCTGCATAGCGTTCACGTGTGTAGACCACACGTGAGTCTGTAATCCTGCTGTCTGCTTAAGAGC  
+  
FF::F:FFF:F,FFFFFFFFFFFFFFFFFFFFFFFFFFFFFFFF:FFFFFFFFFFFFFFFF,FFFFFFFFFFFF  
FFFFFFFFFFFFFFFFFFFFFFFFFFFFFFFF:FFFFFFFFFFFFFFFFFFFFFFFF:FFFFFFFFFFFFF  
@A00155:342:HHGFNDSXY:1:1606:8115:20807 1:N:0:GAACCTAG+TCCGCATA  
GCATCTTCATCAGCATGCAAAATCTTAACATATTAACAAGCAGTGAGACATGGTTATCTGACCATGAC  
CACCTCTGCATAGCGTTCACGTGTGTAGACCACACGTGAGTCTGTAATCCTGCTGTCTGCTTAAGAGC  
+  
FFFFFFFFFFFFFFFFFFFF,FFFFF:FFFF:FFFFFFFFFFFFFFFF:FFFFFFFFFFFF:FFFFF,FFFFF  
FFFFFFFFFFFFFFFFFFFFFFFFFFFF:,FFF:FFFFFFFF:FFFFFFFFFFFFFFFFFFFFFFFFFFFFF  
@A00155:342:HHGFNDSXY:1:2450:4761:19413 1:N:0:GAACCTAG+TCCGCATA  
GCATCTTCATCAGCATGCAAAATCTTAACATATTAACAAGCAGTGAGACATGGTTATCTGACCATGAC  
CACCTCTGCATAGCGTTCACGTGTGTAGACCACACGTGAGTCTGTAATCCTGCTGTCTGCTTAAGAGC  
+  
FFFFFFFFFFFFFFFFFFFFFFFFFFFF:FFFFFFF,FFFFFFFFFFFFFFFFFFFFFFFFFFFFFFFFFFFF  
FFFFFFFFFFFFFFFFFFFFFFFFFFFFFFFFFFFFFFFF:FF:FFFFFFFFF:FFFFFFFFFFFFFFFF  
@A00155:342:HHGFNDSXY:1:2637:24198:8140 2:N:0:GAACCTAG+TCCGCATA  
GCATCTTCATCAGCATGCAAAATCTTAACATATTAACAAGCAGTGAGACATGGTTATCTGACCATGAC  
CACCTCTGCATAGCGTTCACGTGTGTAGACCACACGTGAGTCTGTAATCCTGCTGTCTGCTTAAGAGC  
+  
FFFFFFFFFFFFFFFFFFFFFFFFFFFFFFFFFFFFFFFFFFFFFFFFFFFFFFFFFFFFFFFF:FFFFFFFFFFFFFFFF  
FFFFFFFFFFFFFFFFFFFFFFFFFFFFFFFFFFFFFFFFFFFFFFFF:FFFFF:FFFFFFFFFFFFFFFF:FFFFF  
@A00155:342:HHGFNDSXY:1:1535:16405:8703 1:N:0:GAACCTAG+TCCGCATA  
GCATCTTCATCAGCATGCAAAATCTTAACATATTAACAAGCAGTGAGACATGGTTATCTGACCATGAC  
CACCTCTGCATAGCGTTCACGTGTGTAGACCACACGTGAGTCTGTAATCCTGCTGTCTGCTTAAGAGC  
+  
FFFFF,FFFFFFFFFFFFFFFFFFFFFFFF,FFFFFFFFF:FFFFFFFFFFFFFFFFFFFFFFFFFFFF:FFF  
FFFFFFFF:FFFFFFFFFFFFFFFFFFFFFFFF:FFFFFFFFFFFF:FFFFFFFFFFFFFFFFFFFFFFFF  
@A00155:342:HHGFNDSXY:1:2503:7120:9878 1:N:0:GAACCTAG+TCCGCATA  
GCATCTTCATCAGCATGCAAAATCTTAACATATTAACAAGCAGTGAGACATGGTTATCTGACCATGAC  
CACCTCTGCATAGCGTTCACGTGTGTAGACCACACGTGAGTCTGTAATCCTGCTGTCTGCTTAAGAGC  
+  
FF,FFFFFFFFFFFFFFFFFFFFF:,FFFFF:FFF,F:FF:FFFFFFFFFFFF:F,FFFFFFFF:FFFFF  
FFFFFFFF:F:FFF:FFFFF:FF:FFF:FFFFF::FF,F:FFFFF:FFF:FF,FFFFF:FFF:FFFFF  
@A00155:342:HHGFNDSXY:1:2571:26277:27117 1:N:0:GAACCTAG+TCCGCATA  
CATCTTCATCAGCATGCAAAATCTTAACATATTAACAAGCAGTGAGACATGGTTATCTGACCATGACC  
ACCTCTGCATAGCGTTCACGTGTGTAGACCACACGTGAGTCTGTAATCCTGCTGTCTGCTTAAGAGCA  
+  
FFFFFFFFFFFF:FFFFFFFFFFFFFFFFFFFFFFFFFFFFFFFFFFFFFFFFFFFFFFFFFFFFFFFF  
FFFFFFFFFFFFFFFFFFFFFFFFFFFFFFFFFFFFFFFFFFFFFFFFFFFFFFFFFFFFFFFFFFFFFFFF  
@A00155:342:HHGFNDSXY:1:2163:3188:24486 2:N:0:GAACCTAG+TCCGCATA  
CATCTTCATCAGCATGCAAAATCTTAACATATTAACAAGCAGTGAGACATGGTTATCTGACCATGACC  
ACCTCTGCATAGCGTTCACGTGTGTAGACCACACGTGAGTCTGTAATCCTGCTGTCTGCTTAAGAGCA  
+

FFFFFFFFFFFFFFFF:FFFFFFFFFFFFFFFFFFFFFFFFFFFFFFFFFFFFFFFFFFFFFFFF  
FFFFFFFFFFFFFFFFFFFFFFFFFFFFFFFFFFFFFFFFFFFFFFFFFFFFFFFFFFFFFFFF  
@A00155:342:HHGFNDSXY:1:1441:17282:36714 2:N:0:GAACCTAG+TCCGCATA  
CATCTTCATCAGCATGCAAAATCTTAACATATTAACAAGCAGTGAGACATGGTTATCTGACCATGACC  
ACCTCTGCATAGCGTTCACGTGTGTAGACCACACGTGAGTCTGTAATCCTGCTGTCTGCTTAAGAGCA  
+  
FFFFFFF,FFFFFFFFFFFFFFFFFFFFFFFFFFFFFFFFFFFFFFFFFFFFFFFF:FFF:FFFFFFFFFFFFFFFFFFFFFFFF  
FFFFFFFFFFFFFFFFFFFFFFFFFFFFFFFFFFFFFFFFFFFFFFFFFFFFFFFFFFFFFFFF  
@A00155:342:HHGFNDSXY:1:1254:9136:22795 1:N:0:GAACCTAG+TCCGCATA  
CATCTTCATCAGCATGCAAAATCTTAACATATTAACAAGCAGTGAGACATGGTTATCTGACCATGACC  
ACCTCTGCATAGCGTTCACGTGTGTAGACCACACGTGAGTCTGTAATCCTGCTGTCTGCTTAAGAGCA  
+  
FFFFFFFFFFFFFFFFFFFFFFFFFFFFFFFFFFFFFFFFFFFFFFFFFFFFFFFFFFFFFFFF:FFFFFFFFFFFFFFFF  
FFFFFFFFFFFFFFFFFFFFFFFFFFFFFFFFFFFFFFFFFFFFFFFFFFFFFFFFFFFFFFFF  
@A00155:342:HHGFNDSXY:1:1357:6126:14575 1:N:0:GAACCTAG+TCCGCATA  
CATCTTCATCAGCATGCAAAATCTTAACATATTAACAAGCAGTGAGACATGGTTATCTGACCATGACC  
ACCTCTGCATAGCGTTCACGTGTGTAGACCACACGTGAGTCTGTAATCCTGCTGTCTGCTTAAGAGCA  
+  
F:FFFFFF,F:FFFFFFFFFFFFFFFFFFFFFFFFFFFFFFFFFFFFFFFFFFFFFFFF:FFFFFFFFFFFFFFFF  
FFFFFFFFFFFFFFFFFFFFFFFFFFFFFFFFFFFFFFFFFFFFFFFFFFFFFFFFFFFFFFFF:FFFFFFFFFFFFFFFF  
@A00155:342:HHGFNDSXY:1:1138:6271:32330 1:N:0:GAACCTAG+TCCGCATA  
CATCTTCATCAGCATGCAAAATCTTAACATATTAACAAGCAGTGAGACATGGTTATCTGACCATGACC  
ACCTCTGCATAGCGTTCACGTGTGTAGACCACACGTGAGTCTGTAATCCTGCTGTCTGCTTAAGAGCA  
+  
FFFFFFFFFFF:FFFFFFFFFFFFFFFFFFFFFFFFFFFFFFFFFFFFFFFFFFFFFFFFFFFFFFFFFFFFFFFF  
FFFFFFFFFFFFFFFFFFFFFFFFFFFFFFFFFFFFFFFFFFFFFFFFFFFFFFFFFFFFFFFF:FFFFFFFFFFFFFFFF  
@A00155:342:HHGFNDSXY:1:1354:27724:26772 1:N:0:GAACCTAG+TCCGCATA  
CATCTTCATCAGCATGCAAAATCTTAACATATTAACAAGCAGTGAGACATGGTTATCTGACCATGACC  
ACCTCTGCATAGCGTTCACGTGTGTAGACCACACGTGAGTCTGTAATCCTGCTGTCTGCTTAAGAGCA  
+  
FFFFFFFFFFFFFFFFFFFFFFFFFFFFFFFFFFFFFFFFFFFFFFFFFFFFFFFFFFFFFFFF:FFFFFF,FFFFFFFF  
:FFFFFFFFFFFFFFFFFFFFFFFFFFFFFFFFFFFFFFFFFFFFFFFFFFFFFFFFFFFFFFFF:FFFFFFF  
@A00155:342:HHGFNDSXY:1:2624:17210:30420 2:N:0:GAACCTAG+TCCGCATA  
CATCTTCATCAGCATGCAAAATCTTAACATATTAACAAGCAGTGAGACATGGTTATCTGACCATGACC  
ACCTCTGCATAGCGTTCACGTGTGTAGACCACACGTGAGTCTGTAATCCTGCTGTCTGCTTAAGAGCA  
+  
FFFFFFF:FFFFFFFFFFFFFFFFFFFFFFFFFFFFFFFF:F,FF,F:FFFFFFFFFFFFFFFFFFFFFFFF  
FFFFFFFFFFFFFFFFFFFFFFFFFFFFFFFFFFFFFFFFFFFFFFFFFFFFFFFFFFFFFFFF:FFFFFFFF  
@A00155:342:HHGFNDSXY:1:1639:25021:9596 1:N:0:GAACCTAG+TCCGCATA  
CATCTTCATCAGCATGCAAAATCTTAACATATTAACAAGCAGTGAGACATGGTTATCTGACCATGACC  
ACCTCTGCATAGCGTTCACGTGTGTAGACCACACGTGAGTCTGTAATCCTGCTGTCTGCTTAAGAGCA  
+  
FFFFFFFFFFFFFFFFFFFFFFFFFFFFFFFFFFFFFFFF,FFFFFFFFFFFFFFFFFFFFFFFF:FFF:FFFFFFFF  
FFFFFFFFFFFFFFFFFFFFFFFFFFFFFFFFFFFFFFFFFFFFFFFFFFFFFFFFFFFFFFFF:FFFFFFFF  
@A00155:342:HHGFNDSXY:1:2357:6831:10755 1:N:0:GAACCTAG+TCCGCATA  
CATCTTCATCAGCATGCAAAATCTTAACATATTAACAAGCAGTGAGACATGGTTATCTGACCATGACC  
ACCTCTGCATAGCGTTCACGTGTGTAGACCACACGTGAGTCTGTAATCCTGCTGTCTGCTTAAGAGCA  
+  
FFFFFFFFFFFFFFFFFFFFFFFFFFFFFFFF:FFFFFFFFFFFFFFFFFFFFFFFFFFFFFFFFFFFFFFFF,FFFFF:  
FFFFFFFFFFFFFFFFFFFFFFFFFFFFFFFFFFFFFFFFFFFFFFFFFFFFFFFFFFFFFFFF:FFFFFFFFFFFFFFFF  
@A00155:342:HHGFNDSXY:1:2115:5014:21418 1:N:0:GAACCTAG+TCCGCATA  
CATCTTCATCAGCATGCAAAATCTTAACATATTAACAAGCAGTGAGACATGGTTATCTGACCATGACC  
ACCTCTGCATAGCGTTCACGTGTGTAGACCACACGTGAGTCTGTAATCCTGCTGTCTGCTTAAGAGCA  
+

FFFFFFFFFFFFFFFFFFFFFFFF:FFFFFFFF:FFFFFFFFFFFFFFFF:FFFFFFFFFFFFFFFFFFFFFFFFFFFFFFFF  
FFFFFFFFFFFFFFFFFFFFFFFFFFFFFFFFFFFFFFFFFFFFFFFFFFFFFFFFFFFFFFFFFFFFFFFFFFFFFFFF:  
@A00155:342:HHGFNDSXY:1:2115:5412:30311 1:N:0:GAACCTAG+TCCGCATA  
CATCTTCATCAGCATGCAAAATCTTAACATATTAACAAGCAGTGAGACATGGTTATCTGACCATGACC  
ACCTCTGCATAGCGTTCACGTGTGTAGACCACACGTGAGTCTGTAATCCTGCTGTCTGCTTAAGAGCA  
+  
FFFFFFF:FFFFFFFFFFFFFFFFFFFFFFFFFFFFFFFF,F,FFFFFFFFFFFFFFFFFFFFFFFFFFFFFFFF:  
FFFFFFFFFFFFFF:FFFF:FFFFFFFFFFFFFFFFFFFFFFFFFFFFFFFFFFFFFFFFFFFFFFFFFFFFFFFF  
@A00155:342:HHGFNDSXY:1:1615:5710:2613 1:N:0:GAACCTAG+TCCGCATA  
ATCTTCATCAGCATGCAAAATCTTAACATATTAACAAGCAGTGAGACATGGTTATCTGACCATGACCA  
CCTCTGCATAGCGTTCACGTGTGTAGACCACACGTGAGTCTGTAATCCTGCTGTCTGCTTAAGAGCAT  
+  
FFFFFFFFF,FFFF:FFFFFF:FFFFFFFFFFFFFFFFFFFFFFFFFFFFFFFF:FFFFFFFFFFFFFFFFFFFFFFF  
FFFFFFFFFFFFFFFFFFFFFFFFFFFFFFFF:FFFFFFFFFFFFFFFFFFFFFFFFFFFFFFFFFFFFFFFFFFFFFFF  
@A00155:342:HHGFNDSXY:1:2134:30246:24126 1:N:0:GAACCTAG+TCCGCATA  
ATCTTCATCAGCATGCAAAATCTTAACATATTAACAAGCAGTGAGACATGGTTATCTGACCATGACCA  
CCTCTGCATAGCGTTCACGTGTGTAGACCACACGTGAGTCTGTAATCCTGCTGTCTGCTTAAGAGCAT  
+  
FFFFFFFFFFFFFFFFFFFFFFFFFFFFFFFFFFFFFFFFFFFFFFFFFFFFFFFFFFFFFFFFFFFFFFFFFFFFFFF  
FFFFFFFFFFFFFFFFFFFFFFFFFFFFFFFFFFFFFFFFFFFFFFFFFFFFFFFFFFFFFFFFFFFFFFFFFFFFFFF  
@A00155:342:HHGFNDSXY:1:2416:15899:34757 1:N:0:GAACCTAG+TCCGCATA  
TCTTCATCAGCATGCAAAATCTTAACATATTAACAAGCAGTGAGACATGGTTATCTGACCATGACCAC  
CTCTGCATAGCGTTCACGTGTGTAGACCACACGTGAGTCTGTAATCCTGCTGTCTGCTTAAGAGCAT  
+  
FFFFFFFFFFFFFF:FFFFFFFFFFFFFFFF:FFFFFFFFFFFFFFFFFFFFFFFFFFFFFFFFFFFFFFFFFFFFFFF  
FFFFFFF:FFFFFFFFFFFFFFFFFFFFFFFFFFFFFFFFFFFFFFFFFFFFFFFFFFFFFFFFFFFFFFFFFFFFFFF  
@A00155:342:HHGFNDSXY:1:1551:6298:6324 2:N:0:GAACCTAG+TCCGCATA  
TCTTCATCAGCATGCAAAATCTTAACATATTAACAAGCAGTGAGACATGGTTATCTGACCATGACCAC  
CTCTGCATAGCGTTCACGTGTGTAGACCACACGTGAGTCTGTAATCCTGCTGTCTGCTTAAGAGCATC  
+  
:FFFFFFFFFFFFFFFFFFFFFFFFFFFFFFFF:FFFFFFFFFFFFFFFFFFFFFFFF:FFFFFFFFF,FFFF:FF:FF  
:FFFFFFFFFFFFFFFFFFFFFFFF:FFFFFFFFFFFFFF:,FF::FFFFFFFF:FFF:FFFF,FFFF:F::FFF  
@A00155:342:HHGFNDSXY:1:1366:7175:30890 2:N:0:GAACCTAG+TCCGCATA  
TCTTCATCAGCATGCAAAATCTTAACATATTAACAAGCAGTGAGACATGGTTATCTGACCATGACCAC  
CTCTGCATAGCGTTCACGTGTGTAGACCACACGTGAGTCTGTAATCCTGCTGTCTGCTTAAGAGCATC  
+  
FFFFFFFFFFFFFFFFFFFFFFFFFFFFFFFFFFFFFFFF:FF:FFFF:FFFFFFFF:FFFFFFFF:FFFFFFFFF  
FFFFFFFFFFFFFFFFFFFFFFFF:FFFFFFFFFFFFFFFFFFFFFFFFFFFFFFFFFFFFFFFFFFFFFFFF,FFFFFFFFF:F  
@A00155:342:HHGFNDSXY:1:2417:17327:16658 1:N:0:GAACCTAG+TCCGCATA  
TCTTCATCAGCATGCAAAATCTTAACATATTAACAAGCAGTGAGACATGGTTATCTGACCATGACCAC  
CTCTGCATAGCGTTCACGTGTGTAGACCACACGTGAGTCTGTAATCCTGCTGTCTGCTTAAGAGCATC  
+  
FFFFFFFFFFFFFFFFFFFFFFFFFFFFFFFFFFFFFFFFFFFFFFFFFFFFFFFFFFFFFFFFFFFFFFFFFFFFFFF  
FFFFFFFFFFFFFFFFFFFFFFFFFFFFFFFFFFFFFFFFFFFFFFFFFFFFFFFFFFFFFFFFFFFFFFFFFFFFFFF  
@A00155:342:HHGFNDSXY:1:2609:6298:29027 1:N:0:GAACCTAG+TCCGCATA  
CTTCATCAGCATGCAAAATCTTAACATATTAACAAGCAGTGAGACATGGTTATCTGACCATGACCACC  
TCTGCATAGCGTTCACGTGTGTAGACCACACGTGAGTCTGTAATCCTGCTGTCTGCTTAAGA  
+  
F:FFFFF,FFF:FFFFFFFFFFFF:,FFFF:FFFFFFFFF:,FFFFFFFFFFFFFFFFFFFFFFFFFFFFFFF,FFF  
:FFFFFFFFFFFFFF:FFFFFFFFFFFFFFFFFFFFFFFFFFFFFFF,FFFFF:F:FFFFF,FFFFF:FFFF  
@A00155:342:HHGFNDSXY:1:2253:2546:1266 2:N:0:GAACCTAG+TCCGCATA  
CTTCATCAGCATGCAAAATCTTAACATATGAACAAGCAGTGAGACATGGTTATCTGACCATGACCACC  
TCTGCATAGCGTTCACGTGTGTAGACCACACGTGAGTCTGTAATCCTGCTGTCTGCTTAAGAGCATC  
+



FFFFFFFFFFFFFFFF:FFFFFFFF:FF,,FFF,FFF::FFFFFFFFFFFFFFFFFFFFFFFFFFFFFFFF:FF  
FFFFFFFFFFFFFFFFFFFFFFFFFFFFFFFFFFFFFFFFFFFFFFFFFFFFFFFFFFFFFFFF:FFFFFFFFFFFFFFF  
@A00155:342:HHGFNDSXY:1:2445:16495:33317 1:N:0:GAACCTAG+TCCGCATA  
CTTCATCAGCATGCAAAATCTTAACATATTAACAAGCAGTGAGACATGGTTATCTGACCATGACCACC  
TCTGCATAGCGTTCACGTGTGTAGACCACACGTGAGTCTGTAATCCTGCTGTCTGCTTAAGAGCATCT  
+  
FFFFF:F:FFFFFFFFF::FFFF,F:FFFFFFFFFFFFFFFFFFFFFFFFFFFFFFFFF,:FFFFFFFFFFFF  
FFFFFFFFFFFFFFFFFFFFFFFFFFFFFFFFFFFFFFFFFFFFFFFFFFFFFFFFFFFFFFFF:FFFFFFFFFFFF  
@A00155:342:HHGFNDSXY:1:1604:4689:25300 2:N:0:GAACCTAG+TCCGCATA  
CTTCATCAGCATGCAAAATCTTAACATATTAACAAGCAGTGAGACATGGTTATCTGACCATGACCACC  
TCTGCATAGCGTTCACGTGTGTAGACCACACGTGAGTCTGTAATCCTGCTGTCTGCTTAAGAGCATCT  
+  
FFFFFFFFFFFFFFFFFFFFFFFFFFFFFFFFFFFFFFFF:F,FFFFFFFFF:FFFFFFFFFFFFFFFFFFFFFFFF  
FFFFFFFFFFFFFFFFFFFFFFFFFFFFFFFFFFFFFFFFFFFFFFFFFFFFFFFFFFFFFFFF:FFFFFFFFFF,FF  
@A00155:342:HHGFNDSXY:1:2171:22254:12571 1:N:0:GAACCTAG+TCCGCATA  
CTTCATCAGCATGCAAAATCTTAACATATTAACAAGCAGTGAGACATGGTTATCTGACCATGACCACC  
TCTGCATAGCGTTCACGTGTGTAGACCACACGTGAGTCTGTAATCCTGCTGTCTGCTTAAGAGCATCT  
+  
:FFF::FF:FFF,FFFFFF:F:FFFFFFFFFFFFFF::F:,F,FFF,:FFF:FF:F:,FFFFFF,FFF  
:FFFFFF,F,F:F::FFFF,,:FFFFFF,F,FFFF::F,FFFFFF:F,,F,FFF:,FFFF:FFFFFFF  
@A00155:342:HHGFNDSXY:1:1103:12518:1344 2:N:0:GAACCTAG+TCCGCATA  
CTTCATCAGCATGCAAAATCTTAACATATTAACAAGCAGTGAGACATGGTTATCTGACCATGACCACC  
TCTGCATAGCGTTCACGTGTGTAGACCACACGTGAGTCTGTAATCCTGCTGTCTGCTTAAGAGCATCT  
+  
FFF:FFFFFFFFFFFFFFFFFFFFFFFFFFFFFFFFF,:FFFFFF:FFFFFFFFFFFFFFFFFFFFFFFFFFFFFF  
FFFFFFFFFFFFFFFFFFFFFFFFFFFFFFFFFFFFFFFFFFFFFFFFFFFFFFFFFFFFFFFF:FFFFFFFFFFFF  
@A00155:342:HHGFNDSXY:1:1372:8513:1423 1:N:0:GAACCTAG+TCCGCATA  
CTTCATCAGCATGCAAAATCTTAACATATTAACAAGCAGTGAGACATGGTTATCTGACCATGACCACC  
TCTGCATAGCGTTCACGTGTGTAGACCACACGTGAGTCTGTAATCCTGCTGTCTGCTTAAGAGCATCT  
+  
FFFFFFFFFFFFFFFFFFFFFFFFFFFFFFFFFFFFFFFF:FF,FFFFFFFFFFFFFF,FFFFFFFFFFFFFFFF  
FFFFFFFFFFFFFFFF:FFFFFFFFFFFFFFFFFFFFFFFFFFFFFFFFFFFFFFFF:FFFFFFFFFFFFFFF  
@A00155:342:HHGFNDSXY:1:1604:4689:25300 1:N:0:GAACCTAG+TCCGCATA  
CTTCATCAGCATGCAAAATCTTAACATATTAACAAGCAGTGAGACATGGTTATCTGACCATGACCACC  
TCTGCATAGCGTTCACGTGTGTAGACCACACGTGAGTCTGTAATCCTGCTGTCTGCTTAAGAGCATCT  
+  
FFFFFFFFFFFFFFFFFFFFFFFFFFFFFFFFFFFFFFFF:FFFFFF:FFF:F,FFFFFFFFF::FFFFFFFFFFFFFFFF  
FFFFFFFFFFFFFFFFFFFFFFFFFFFFFFFF:FFFFFFFFFFFFFFFFFFFFFFFF:FFFFFFFFFFFFFFFFFFFF:FF  
@A00155:342:HHGFNDSXY:1:2362:26820:22482 2:N:0:GAACCTAG+TCCGCATA  
CTTCATCAGCATGCAAAATCTTAACATATTAACAAGCAGTGAGACATGGTTATCTGACCATGACCACC  
TCTGCATAGCGTTCACGTGTGTAGACCACACGTGAGTCTGTAATCCTGCTGTCTGCTTAAGAGCATCT  
+  
FFF:FFFFFFFFFFFFFFFFF:FFFFFFFFFFFFFFFFF:F:FFFFFFFFFFFFFFFFF:FFFFF,FFFFF  
FFFFFFFFF:FFFFFFFFFFFFFFFFFFFFFFFFFFFFFFFFFFFFFFFF:FFFFFFFFFFFFFFFFFFFFF  
@A00155:342:HHGFNDSXY:1:2216:5665:1846 1:N:0:GAACCTAG+TCCGCATA  
CTTCATCAGCATGCAAAATCTTAACATATTAACAAGCAGTGAGACATGGTTATCTGACCATGACCACC  
TCTGCATAGCGTTCACGTGTGTAGACCACACGTGAGTCTGTAATCCTGCTGTCTGCTTAAGAGCATCT  
+  
FFFFFFFFFFFFFFFFFFFFFFFFFFFFFFFF:F:FFFFFFFFFFFFFFFFF:FFFFFF:FFFFFFFFFFFFFFFF  
FFFFFFFFFFFF:F:FF,:FFFFFFFF:FFF::FFFFFF:FFFFFFFF:FFFFFFFF:FFFFFFFFFFFF  
@A00155:342:HHGFNDSXY:1:1639:25021:9596 2:N:0:GAACCTAG+TCCGCATA  
CTTCATCAGCATGCAAAATCTTAACATATTAACAAGCAGTGAGACATGGTTATCTGACCATGACCACC  
TCTGCATAGCGTTCACGTGTGTAGACCACACGTGAGTCTGTAATCCTGCTGTCTGCTTAAGAGCATCT  
+

```
F,FF:FF:FFFFFFFFFFFFFFFFFFFFFFFFFFFFFFFFFFFFFFFFFFFFFFFFFFFFFFFFFFFFF:
FFFFFFFFFFFFFFFFFFFFFFFFFFFFFFFFFFFFFFFFFFFFFFFFFFFFFFFFFFFFFFFFFFFFFFF:
@A00155:342:HHGFNDSXY:1:1622:14461:18709 2:N:0:GAACCTAG+TCCGCATA
CTTCATCAGCATGCAAAATCTTAACATATTAACAAGCAGTGAGACATGGTTATCTGACCATGACCACC
TCTGCATAGCGTTCACGTGTGTAGACCACACGTGAGTCTGTAATCCTGCTGTCTGCTTAAGAGCATCT
+
FFFFFFFF:FFFFFFFFFFFFFFFFFFFFFFFF:FF:FFFFFFFFFFFFFFFFFFFFFFFFFFFFFFFF
FFFFFFFFFFFFFFFFFFFFFFFFFFFFFFFFFFFFFFFFFFFFFFFFFFFFFFFFFFFFFFFFFFFFFFF
@A00155:342:HHGFNDSXY:1:2618:6189:16564 2:N:0:GAACCTAG+TCCGCATA
CTTCATCAGCATGCAAAATCTTAACATATTAACAAGCAGTGAGACATGGTTATCTGACCATGACCACC
TCTGCATAGCGTTCACGTGTGTAGACCACACGTGAGTCTGTAATCCTGCTGTCTGCTTAAGAGCATCT
+
FFFFFFFFF,FFF:FFF:F:FFFFFF,FF,,,:F::FFFFFFFFF:FFFFFFFFF:FFFFFFFFF
FF:FFFFF::FFFFFFFFFFFFFFFFFFFFFFFF,FFFFFF,:FFFFFFFFFFFFFFFF:FFF:FFF
@A00155:342:HHGFNDSXY:1:2224:7464:8907 2:N:0:GAACCTAG+TCCGCATA
TCATCAGCATGCAAAATCTTAACATATTAACAAGCAGTGAGACATGGTTATCTGACCATGACCACCTC
TGCATAGCGTTCACGTGTGTAGACCACACGTGAGTCTGTAATCCTGCTGTCTGCTTAAGAGCATCTGC
+
FFFFFFFF:FFFFFFFFFFFFFFFF:FF::FF:FFFFFFFFFFFFFFFFFFFFFFFFFFFFFFFF
FFFFFFFFFFFFFFFFFFFFFFFFFFFFFFFF:FFFFFFFFF:FFFFFFFFF:FFFFFFFFF
@A00155:342:HHGFNDSXY:1:2362:8748:10692 2:N:0:GAACCTAG+TCCGCATA
TCATCAGCATGCAAAATCTTAACATATTAACAAGCAGTGAGACATGGTTATCTGACCATGACCACCTC
TGCATAGCGTTCACGTGTGTAGACCACACGTGAGTCTGTAATCCTGCTGTCTGCTTAAGAGCATCTGC
+
:FFFFFFFFF:FFFFFFFFFFFFFFFFFFFFFFFFFFFFFFFFFFFFFFFFFFFFFFFFFFFFFFFF
FFFF:FFFFFFFFFFFFFFFFFFFFFFFFFFFFFFFFFFFFFFFFFFFFFFFFFFFFFFFFFFFFFFFF
@A00155:342:HHGFNDSXY:1:1410:30454:18380 2:N:0:GAACCTAG+TCCGCATA
TCATCAGCATGCAAAATCTTAACATATTAACAAGCAGTGAGACATGGTTATCTGACCATGACCACCTC
TGCATAGCGTTCACGTGTGTAGACCACACGTGAGTCTGTAATCCTGCTGTCTGCTTAAGAGCATCTGC
+
FFFFFFFFFFFFFFFFF:FFFFFFFFFFFFF:FF:FFFFFFFFFFFFFFFFFFFFFFFFFFFFFFFF
FFFFF:FFFFFFFFFFFFFFFFFFFFFFFFFFFFFFFFFFFFFFFFFFFFFFFFFFFFFFFFFFFFFFFF
@A00155:342:HHGFNDSXY:1:1560:10999:13369 2:N:0:GAACCTAG+TCCGCATA
TCATCAGCATGCAAAATCTTAACATATTAACAAGCAGTGAGACATGGTTATCTGACCATGACCACCTC
TGCATAGCGTTCACGTGTGTAGACCACACGTGAGTCTGTAATCCTGCTGTCTGCTTAAGAGCATCTGC
+
FFFFF:FFFFFFFFFFFFFFFFFFFFFFFF,FFFFFFFFFFFFFFFFFFFFFFFFFFFFFFFF
FFFFFFFFFFFFFFFFFFFFFFFFFFFFFFFFFFFFFFFFFFFFFFFFFFFFFFFFFFFFFFFF
@A00155:342:HHGFNDSXY:1:1378:29930:27743 2:N:0:GAACCTAG+TCCGCATA
CATCAGCATGCAAAATCTTAACATATTAACAAGCAGTGAGACATGGTTATCTGACCATGACCACCTCT
GCATAGCGTTCACGTGTGTAGACCACACGTGAGTCTGTAATCCTGCTGTCTGCTTAAGAGCATCTGCC
+
FFFFFFFFFFFFF:FFFFFFFFFFFFFFFFFFFFFFFFFFFFFFFFFFFFFFFFFFFFFFFFFFFFFFFF
FFFFFFFFFFFFFFFFFFFFFFFFFFFFFFFFFFFFFFFFFFFFFFFFFFFFFFFFFFFFFFFF
@A00155:342:HHGFNDSXY:1:1354:27724:26772 2:N:0:GAACCTAG+TCCGCATA
ATCAGCATGCAAAATCTTAACATATTAACAAGCAGTGAGACATGGTTATCTGACCATGACCACCTCTG
CATAGCGTTCACGTGTGTAGACCACACGTGAGTCTGTAATCCTGCTGTCTGCTTAAGAGCATCTGCCA
+
:FFFFFFFFFFFFFFFFFFFFFFFF,FF::F::FFFF:FFF:FFFFFFFFFFFFFFFFFFFFFFFF
FFFFFFFFFFFFFFFFFFFFFFFFFFFFFFFFFFFFFFFFFFFFFFFFFFFFFFFFFFFFFFFF
@A00155:342:HHGFNDSXY:1:1313:31964:8563 1:N:0:GAACCTAG+TCCGCATA
ATCAGCATGCAAAATCTTAACATATTAACAAGCAGTGAGACATGGTTATCTGACCATGACCACCTCTG
CATAGCGTTCACGTGTGTAGACCACACGTGAGTCTGTAATCCTGCTGTCTGCTTAAGAGCATCTGCCA
+
```

```
FFFFF:FFFFFFFFFFFFFFFF:FFFFFFFFFFFFFFFFFFFFFFFFFFFFFFFFFFFFFFFFFFFFFFFFFFFFFFF:FFFFFFFFFFFFFFFFFFFFFFFFFF  

@A00155:342:HHGFNDSXY:1:1138:6271:32330 2:N:0:GAACCTAG+TCCGCATA  

ATCAGCATGCAAAATCTTAACATATTAAACAAGCAGTGAGACATGGTTATCTGACCATGACCACCTCTG  

CATAGCGTTCACGTGTGTAGACCACACGTGAGTCTGTAATCCTGCTGTCTGCTTAAGAGCATCTGCCA  

+  

FFFFFFFFFFFFFFFF:F:F:FFFFFFFFFFFFFFFFFFFFFFFFFFFFFFFFFFFFFFFFFFFFFFFFFFFFFFF  

FFFFFFFFFFFFFFFFFFFFFFFFFFFFFFFFFFFFFFFFFFFFFFFFFFFFFFFFFFFFFFFFFFFFFFFFFFFFF  

@A00155:342:HHGFNDSXY:1:2138:24370:16673 2:N:0:GAACCTAG+TCCGCATA  

TCAGCATGCAAAATCTTAACATATTAAACAAGCAGTGAGACATGGTTATCTGACCATGACCACCTCTGC  

ATAGCGTTACACGTGTGTAGACCACACGTGAGTCTGTAATCCTGCTGTCTGCTTAAGAGCATCTGCCAG  

+  

:FFFFFFFFFFFFFFFF:FFFFFFFFFFFFFFFFFFFFFFFFFFFFFFFF,FFFFFFFFFFFFFFFFFFFFFFFFFF  

FFFFFFFFFFFFFFFFFFFFFFFFFFFFFFFFFFFFFFFFFFFFFFFFFFFFFFFFFFFFFFFFFFFFFFFFFFFFF  

@A00155:342:HHGFNDSXY:1:1312:3016:24940 2:N:0:GAACCTAG+TCCGCATA  

TCAGCATGCAAAATCTTAACATATTAAACAAGCAGTGAGACATGGTTATCTGACCATGACCACCTCTGC  

ATAGCGTTCACGTGTGTAGACCACACGTGAGTCTGTAATCCTGCTGTCTGCTTAAGAGCATCTGCCAG  

+  

FFFFFFFFFFFF:FFFFFFFFFFF:FFF,FFFFFFFFFFFF:FFFFFFFFFFFFFFFFFFFFFFFFFFFF,FF  

FFFF::FFFFFFFFFFFFFFFFFFFFFFFFFFFFFFFFFFFFFFFFFFFFFFFFFFFFFFFFFFFFFFFFFFFFF  

@A00155:342:HHGFNDSXY:1:1125:8422:10504 2:N:0:GAACCTAG+TCCGCATA  

TCAGCATGCAAAATCTTAACATATTAAACAAGCAGTGAGACATGGTTATCTGACCATGACCACCTCTGC  

ATAGCGTTCACGTGTGTAGACCACACGTGAGTCTGTAATCCTGCTGTCTGCTTAAGAGCATCTGCCAG  

+  

FFFFFFFFF:FFFFFFFFFFFFFFFF:FFFFFFFFFFFFFFFFFFFFFFFF:FFFF:FFF:FFFFFFFFFFFFFFF  

FFFFFFFFFFFFFFFFFFFFFFFFFFFFFFFFFFFFFFFFFFFFFFFFFFFFFFFFFFFFFFFFFFFFFFFFFFFFF  

@A00155:342:HHGFNDSXY:1:2271:6858:18067 2:N:0:GAACCTAG+TCCGCATA  

TCAGCATGCAAAATCTTAACATATTAAACAAGCAGTGAGACATGGTTATCTGACCATGACCACCTCTGC  

ATAGCGTTCACGTGTGTAGACCACACGTGAGTCTGTAATCCTGCTGTCTGCTTAAGAGCATCTGCCAG  

+  

FFFFF:FFFFFFFFFFFFFFFF:FFF,:FF,FFFFFFFFFFFFFFFFFFFFFFFFFFFFFFFFFFFFFFFFFFFFF:  

FFFFFFFFFFFFFFFFFFFFFFFFFFFFFFFFFFFFFFFFFFFFFFFFFFFFFFFFFFFFFFFFFFFFFFFFFFFFF  

@A00155:342:HHGFNDSXY:1:2166:3070:26944 2:N:0:GAACCTAG+TCCGCATA  

CAGCATGCAAAATCTTAACATATTAAACAAGCAGTGAGACATGGTTATCTGACCATGACCACCTCTGCA  

TAGCGTTCACGTGTGTAGACCACACGTGAGTCTGTAATCCTGCTGTCTGCTTAAGAGCATCTGCC  

+  

FFFFF,FFFFF,FFFFFFFFF:FFFFFFFFFFFF:FFFFFFFFFFFFFFFF:FFFFFFFFFFFFFFFF:FFFFF  

FFFFFFFFFFFFFFFFFFFFFFFFFFFFFFFFFFFFFFFFFFFFFFFFFFFFFFFFFFFFFFFFFFFFFFFFFFFFF  

@A00155:342:HHGFNDSXY:1:1608:24026:30984 2:N:0:GAACCTAG+TCCGCATA  

CAGCATGCAAAATCTTAACATATTAAACAAGCAGTGAGACATGGTTATCTGACCATGACCACCTCTGCA  

TAGCGTTCACGTGTGTAGACCACACGTGAGTCTGTAATCCTGCTGTCTGCTTAAGAGCATCTGCCAG  

+  

FFFFF:FFFFF:FFFFFFFFFFFFFFFF,FFF:FFFFFFFFFFFFFFFF:FFFFFFFFFFFFFFFF:FFFFFFFFF  

FFFFFFFFFFFFFFFFFFFFFFFFFFFFFFFFFFFFFFFFFFFFFFFFFFFFFFFFFFFFFFFFFFFFFFFFFFFFF  

@A00155:342:HHGFNDSXY:1:2465:1362:11271 1:N:0:GAACCTAG+TCCGCATA  

CAGCATGCAAAATCTTAACATATTAAACAAGCAGTGAGACATGGTTATCTGACCATGACCACCTCTGCA  

TAGCGTTCACGTGTGTAGACCACACGTGAGTCTGTAATCCTGCTGTCTGCTTAAGAGCATCTGCCAG  

+  

FFFF:FFFFFFFFFFFF,,:F:FF:FFF:FFFF:FFFFFFFFFFFFFFFFFFFFFFFFFFFFF,,:F:FFFFF  

FFF:FFFF:FFFFFFFFFFFF,FF:FFFF,FF:FFF:FFFFF,FFF,FFFF:F:,FFFF:FF::FF  

@A00155:342:HHGFNDSXY:1:1376:3839:23046 2:N:0:GAACCTAG+TCCGCATA  

CAGCATGCAAAATCTTAACATATTAAACAAGCAGTGAGACATGGTTATCTGACCATGACCACCTCTGCA  

TAGCGTTCACGTGTGTAGACCACACGTGAGTCTGTAATCCTGCTGTCTGCTTAAGAGCATCTGCCAG
```

FFFFFFFFFFFFFFF,FFFFFFFFFFFFFFF  
FFFFFFFFFFFFFFFFFFFFFFFFFFFFFFFFFFFFFFFFFFFFF:FFFFFFFF  
@A00155:342:HHGFNDSXY:1:2669:28320:35383 2:N:0:GAACCTAG+TCCGCATA  
CAGCATGCAAAATCTTAACATATTAACAAGCAGTGAGACATGGTTATCTGACCATGACCACCTCTGCA  
TAGCGTTCACGTGTGTAGACCACACGTGAGTCTGTAATCCTGCTGTCTGCTTAAGAGCATCTGCCAGG  
+  
:FFF:FFFFFFFFFFFFFFF:FFFF:, :FF:FFFFFFFFFFFFFFF:FF:FFFF:FFFFF, FFFFFFF, FFF  
FFF:FFFFFFFF:FFFFFFFFFFFFFFFFFFFFFFFFF: :FFF:FFFFFFFFFFFFFFFFF:FFFF:FF:FFF  
@A00155:342:HHGFNDSXY:1:2115:5412:30311 2:N:0:GAACCTAG+TCCGCATA  
CAGCATGCAAAATCTTAACATATTAACAAGCAGTGAGACATGGTTATCTGACCATGACCACCTCTGCA  
TAGCGTTCACGTGTGTAGACCACACGTGAGTCTGTAATCCTGCTGTCTGCTTAAGAGCATCTGCCAGG  
+  
FFFFFF, FFFF:FFFFFFFF:FFFF:FF:FFFFFFFFFFFFFFFFFFFFFFFFFFFFFFFFFFFFFFFFFFFFF  
FFFFFFFFFFFFFFFFF:FFFFFFFF:FFFF:FFFFFFFFFFFFFFFFFFFFFFFFF:FFFFFFFFFFFFFFFFFFFFF  
@A00155:342:HHGFNDSXY:1:2115:5014:21418 2:N:0:GAACCTAG+TCCGCATA  
CAGCATGCAAAATCTTAACATATTAACCAGCAGTGAGACATGGTTATCTGACCATGACCACCTCTGCA  
TAGCGTTCACGTGTGTAGACCACACGTGAGTCTGTAATCCTGCTGTCTGCTTAAGAGCATCTGCCAGG  
+  
FFFF, FFFFFFFFFF:FFF:F:FF, FF, FFF:FFFFFFFF, FFFFFFFFFFFFFFFFFFFFFF:FFFFFFFF  
FFFFFFFF:FFFF:FFFF, FFFFFFFFFFFFFFFFFFFFFFFFFFFFFFFFFFFFFFFFFFFFFFFFFFFFFFFF  
@A00155:342:HHGFNDSXY:1:1673:22625:16000 2:N:0:GAACCTAG+TCCGCATA  
CAGCATGCAAAATCTTAACATATTAACAAGCAGTGAGACATGGTTATCTGACCATGACCACCTCTGCA  
TAGCGTTCACGTGTGTAGACCACACGTGAGTCTGTAATCCTGCTGTCTGCTTAAGAGCATCTGCCAGG  
+  
FFFFFFFFFFFFFFFFFFFFFFF:FFFFFFFF:FFFF:FFFFFFFFFFFFFFFFFFFFFFFFFFFFFFFFFFFFF  
FFFFFFFFFFFFFFFFFFFFFFFFFFFFFFFFFFFFFFFFFFFFF, FFFFFFFFFFFFFFFFFFFFFFFFFFFFFF  
@A00155:342:HHGFNDSXY:1:2319:18557:12587 2:N:0:GAACCTAG+TCCGCATA  
CAGCATGCAAAATCTTAACATATTAACAAGCAGTGAGACATGGTTATCTGACCATGACCACCTCTGCA  
TAGCGTTCACGTGTGTAGACCACACGTGAGTCTGTAATCCTGCTGTCTGCTTAAGAGCATCTGCCAGG  
+  
FFFFFFFFFFFFFFFFFFFFFFFFF:FFFFFFFFFFFFFFFFFFFFF:FFFFFFFFFFFFFFFFFFFFF:FFFFFFF  
FFFFFFFFFFFFF:FFF, FFFFFFFFFF:FFFFFFFFFFFFFFFFFFFFF:FFFFFFFFFFFFFFFFFFFFF  
@A00155:342:HHGFNDSXY:1:2239:10899:17300 2:N:0:GAACCTAG+TCCGCATA  
CAGCATGCAAAATCTTAACATATTAACAAGCAGTGAGACATGGTTATCTGACCATGACCACCTCTGCA  
TAGCGTTCACGTGTGTAGACCACACGTGAGTCTGTAATCCTGCTGTCTGCTTAAGAGCATCTGCCAGG  
+  
FFFFFFFFFFFFF:FFFFFFFFFFFFFFFFFFFFFFFFFFFFFFFFFFFFFFFFFFFFFFFFFFFFF:FFFFF  
FFFFFFFFFFFFFFFFFFFFFFFFFFFFF:FFFFFFFFFFFFFFFFFFFFFFFFFFFFFFFFFFFFFFFFFFFFF  
@A00155:342:HHGFNDSXY:1:1336:15338:30561 2:N:0:GAACCTAG+TCCGCATA  
CAGCATGCAAAATCTTAACATATTAACAAGCAGTGAGACATGGTTATCTGACCATGACCACCTCTGCA  
TAGCGTTCACGTGTGTAGACCACACGTGAGTCTGTAATCCTGCTGTCTGCTTAAGAGCATCTGCCAGG  
+  
FFFFF:FFFFFFFFFFFFFFFFFFFFFFF:FFFFFFFFFFFFF:FFFFFFFFFFFFFFFFFFFFFFFFFFFFF  
FFFFFFFFFFFFFFFFFFFFFFFFFFFFFFFFFFFFFFFFFFFFFFFFFFFFFFFFFFFFFFFFFFFFFFFFFFFFF  
@A00155:342:HHGFNDSXY:1:1630:8169:22216 2:N:0:GAACCTAG+TCCGCATA  
CAGCATGCAAAATCTTAACATATTAACAAGCAGTGAGACATGGTTATCTGACCATGACCACCTCTGCA  
TAGCGTTCACGTGTGTAGACCACACGTGAGTCTGTAATCCTGCTGTCTGCTTAAGAGCATCTGCCAGG  
+  
FFFFFFFFFFFFFFFFFFFFFFFFF:FFF, FFFFFFFFFFFFFFFFFFFFFFFFFFFFFF, FFFFFFFFFFFFFF  
FFFFFFFFFFFFFFFFFFFFFFFFFFFFFFFFFFFFFFFFFFFFFFFFFFFFFFFFFFFFFFFFFFFFFFFFFFFFF  
@A00155:342:HHGFNDSXY:1:2134:30246:24126 2:N:0:GAACCTAG+TCCGCATA  
CAGCATGCAAAATCTTAACATATTAACAAGCAGTGAGACATGGTTATCTGACCATGACCACCTCTGCA  
TAGCGTTCACGTGTGTAGACCACACGTGAGTCTGTAATCCTGCTGTCTGCTTAAGAGCATCTGCCAGG  
+

FFFFFFFFFFFFFFFFFFFFFFFF,FFFFF,FFFFFFFFFFFF:FFFFFFFFFFFFFFFFFFFFFFFFFFFFF  
FFFFFFFFFFFFFFFFFFFFFFFF:FFFFFFFFFFFFFFFFFFFFFFFFFFFFFFFFFFFFFFFFFFFFF  
@A00155:342:HHGFNDSXY:1:2330:2049:26209 2:N:0:GAACCTAG+TCCGCATA  
AGCATGCAAAATCTTAACATATTAACAAGCAGTGAGACATGGTTATCTGACCATGACCACCTCTGCAT  
AGCGTTCACGTGTGTAGACCACACGTGAGTCTGTAATCCTGCTGTCTGCTTAAGAGCATCTGCCAGG  
+  
FFFFFFFFFFFFFFFFFFFFFFFFF,:FFFFFFFF:FFFFFF:FFFFFFFFFFFFFFFFFFFFFFFFFFFFF  
FFFFFFFFFFFFFFFFFFFFFFFF:FFFFFFFFFFFFFFFFFFFFFFFFFFFFFFFFFFFFFFFFFFFFF  
@A00155:342:HHGFNDSXY:1:1446:9534:25895 2:N:0:GAACCTAG+TCCGCATA  
AGCATGCAAAATCTTAACATATTAACAAGCAGTGAGACATGGTTATCTGACCATGACCACCTCTGCAT  
AGCGTTCACGTGTGTAGACCACACGTGAGTCTGTAATCCTGCTGTCTGCTTAAGAGCATCTGCCAGGT  
+  
FFF,F,FFFFFFFFFFFFFFFFF,F:F:FFF:FFF,FFFFFFFFFFFFFFFFFFFFFFFFFFFFFFFFFFFFF  
FFFFFFFFFFFFFFFFFFFFFFFFFFFFFFFFFFFFFFFFFFFFFFFFFFFFFFFFFFFFFFFFFFFFF  
@A00155:342:HHGFNDSXY:1:2667:21947:6527 2:N:0:GAACCTAG+TCCGCATA  
AGCATGCAAAATCTTAACATATTAACAAGCAGTGAGACATGGTTATCTGACCATGACCACCTCTGCAT  
AGCGTTCACGTGTGTAGACCACACGTGAGTCTGTAATCCTGCTGTCTGCTTAAGAGCATCTGCCAGGT  
+  
FFFFFFFFFFFFFFFFFFFFFFFFF:F:FFFFFF:FFFFFFFFFFFFFFFFFFFFFFFFFFFFFFFFFFFF:FFFFF  
FFFFFFFFFFFFFFFFFFFFFFFFF,FFFFFFFFFFFFFFFFFFFFFFFFFFFFFFFFFFFFFFFFFFFFF  
@A00155:342:HHGFNDSXY:1:2361:16143:30953 2:N:0:GAACCTAG+TCCGCATA  
CATGCAAAATCTTAACATATTAACAAGCAGTGAGACATGGTTATCTGACCATGACCACCTCTGCATAG  
CGTTCACGTGTGTAGACCACACGTGAGTCTGTAATCCTGCTGTCTGCTTAAGAGCATCTGCCAGG  
+  
FFFFFFFFFFFFFFFFFFFFFFFFFFFFFFFFFFFFFFFFFFFFFFFFFFFFFFFFFFFFFFFFFFFFFFFFF  
FFFFFFFFFFFFFFFFFFFFFFFFFFFFFFFFFFFFFFFFFFFFFFFFFFFFFFFFFFFFFFFFFFFFFFFFF  
@A00155:342:HHGFNDSXY:1:2608:30327:2065 2:N:0:GAACCTAG+TCCGCATA  
ATGCAAAATCTTAACATATTAACAAGCAGTGAGACATGGTTATCTGACCATGACCACCTCTGCATAGC  
GTTACAGTGTGTAGACCACACGTGAGTCTGTAATCCTGCTGTCTGCTTAAGAGCATATGCCAGGTTAG  
+  
FFFFFFFFF:FFFFFFFFF,FF,FFFFFFFFFFFFFFFFFFFFFFFFFFFFFFFFFFFFFFFFFFFFFFFFF:FF  
FFFFFFFFFFFFFFFFFFFFFFFFFFFFFFFFFFFFFFFFFFFFFFFFFFFFFFFFFFFFFFFFFFFFFFFFF  
@A00155:342:HHGFNDSXY:1:2503:6027:22357 2:N:0:GAACCTAG+TCCGCATA  
ATGCAAAATCTTAACATATTAACAAGCAGTGAGACATGGTTATCTGACCATGACCACCTCTGCATAGC  
GTTACAGTGTGTAGACCACACGTGAGTCTGTAATCCTGCTGTCTGCTTAAGAGCATCTGCCAGGTTAG  
+  
FFFFFFFFFFFFFFFFFFFFFFFFF,FF:FFFFFFFFFFFFFFFFFFFFFFFFFFFFFFFFFFFFFFFFFFFF,FFFFFFFFF  
FFFFFFFFFFFFFFFFFFFFFFFFFFFFFFFFFFFFFFFFFFFFFFFFFFFFFFFFFFFFFFFFFFFFFFFFF:FFFFF  
@A00155:342:HHGFNDSXY:1:2608:30038:1846 2:N:0:GAACCTAG+TCCGCATA  
ATGCAAAATCTTAACATATTAACAAGCAGTGAGACATGGTTATCTGACCATGACCACCTCTGCATAGC  
GTTACAGTGTGTAGACCACACGTGAGTCTGTAATCCTGCTGTCTGCTTAAGAGCATATGCCAGGTTAG  
+  
FFFFFFFFFFFFFFFFFFFFFFFFF:FFF:FFFFFFFFFFFFFFFFFFFFFFFFFFFFFFFFFFFFFFFFFFFF  
FFFFFFFFFFFFFFFFFFFFFFFFFFFFFFFFFFFFFFFFFFFFFFFFFFFFFFFFFFFFFFFFFFFFFFFFF  
@A00155:342:HHGFNDSXY:1:2637:24198:8140 1:N:0:GAACCTAG+TCCGCATA  
ATGCAAAATCTTAACATATTAACAAGCAGTGAGACATGGTTATCTGACCATGACCACCTCTGCATAGC  
GTTACAGTGTGTAGACCACACGTGAGTCTGTAATCCTGCTGTCTGCTTAAGAGCATCTGCCAGGTTAG  
+  
FFFFFFFFFFFFFFFFFFFFFFFFF:FFFFFF:FFFFFFFFFFFFFFFFFFFFFFFFFFFFFFFFFFFFFFFFF  
FFFFFFFFFFFFFFFFFFFFFFFFFFFFFFFFFFFFFFFFFFFFFFFFFFFFFFFFFFFFFFFFFFFFFFFFF  
@A00155:342:HHGFNDSXY:1:1344:22227:14215 2:N:0:GAACCTAG+TCCGCATA  
ATGCAAAATCTTAACATATTAACAAGCAGTGAGACATGGTTATCTGACCATGACCACCTCTGCATAGC  
GTTACAGTGTGTAGACCACACGTGAGTCTGTAATCCTGCTGTCTGCTTAAGAGCATCTGCCAGGTTAG  
+

:FFFF:FFF:FFFFFFFFF:,F:,FFFFFFFFFFFFFFFF:FFFFFFFFFFFFFFFFFFFFFFFFF  
FFFFFFFFF:FFFFFFFFFFFFFFFFFFFFFFFFFFFFFFFFFFFFFFFFF:FFFFFFFFFFFFFFFFF:F  
@A00155:342:HHGFNDSXY:1:1108:16749:19601 2:N:0:GAACCTAG+TCCGCATA  
TGCAAAATCTTAACATATTAACAAGCAGTGAGACATGGTTATCTGACCATGACCACCTCTGCATAGCG  
TTCACGTGTGTAGACCACACGTGAGTCTGTAATCCTGCTGTCTGCTTAAGAGCATCTGCCAGGTTAGT  
+  
FFFFF:FFFFFFFFF,F:FF,,FFFFFFFFFFFFFFFFFFFFFFFFFFFFFFFFF:FFFFF  
FFFFFFFFFFFFFFFFF:FFFFFFFFF:FFFFFFFFF,FFFFFFFFFFFFFFFFFFFFFFFFF  
@A00155:342:HHGFNDSXY:1:2275:16152:33786 2:N:0:GAACCTAG+TCCGCATA  
TGCAAAATCTTAACATATTAACAAGCAGTGAGACATGGTTATCTGACCATGACCACCTCTGCATAGCG  
TTCACGTGTGTAGACCACACGTGAGTCTGTAATCCTGCTGTCTGCTTAAGAGCATCTGCCAGGTTAGT  
+  
FFFFFFFFFFF:F:FFFFFFFFF:FFFFFFFFFFFFFFFFFFFFFFFFF:FF:FFFFFFFFF:F  
FFFFFFFFFFFFFFFFF:FFFFF:FFFFFFFFFFFFFFFFFFFFFFFFFFFFFFFFF,FFFFFFFFF  
@A00155:342:HHGFNDSXY:1:1441:17644:1485 2:N:0:GAACCTAG+TCCGCATA  
TGCAAAATCTTAACATATTAACAAGCAGTGAGACATGGTTATCTGACCATGACCACCTCTGCATAGCG  
TTCACGTGTGTAGACCACACGTGAGTCTGTAATCCTGCTGTCTGCTTAAGAGCATCTGCCAGGTTAGT  
+  
FFFF:FF:FFFFF,FFFFFFFFF,FFFFFFFFFFF:FFFFFFFFFFFFFFFFFFFFFFFFF  
,FFFFFFFFFFFFFFFFFFFFFFFFFFFFFFFFFFFFFFFFFFFFFFFFF  
@A00155:342:HHGFNDSXY:1:2559:29966:32064 2:N:0:GAACCTAG+TCCGCATA  
TGCAAAATCTTAACATATTAACAAGCAGTGAGACATGGTTATCTGACCATGACCACCTCTGCATAGCG  
TTCACGTGTGTAGACCACACGTGAGTCTGTAATCCTGCTGTCTGCTTAAGAGCATCTGCCAGGTTAGT  
+  
:FFFFFFFFFFFFFFF:FF:FFFF:FFFFFFFFFFFFFFFFFFFFFFFFF:FFFFFFFFF  
FFFFFFFFFFFFFFFFF:FFFFFFFFFFFFFFFFFFFFFFFFFFFFFFFFF:FFFFFFFFF:F  
@A00155:342:HHGFNDSXY:1:1615:5710:2613 2:N:0:GAACCTAG+TCCGCATA  
TGCAAAATCTTAACATATTAACAAGCAGTGAGACATGGTTATCTGACCATGACCACCTCTGCATAGCG  
TTCACGTGTGTAGACCACACGTGAGTCTGTAATCCTGCTGTCTGCTTAAGAGCATCTGCCAGGTTAGT  
+  
FFFFFFFFFFF:FFFFFFFFF,F,F,FFFFFFFFFFF:FFFFFFFFFFFFFFFFFFFFFFFFF  
FFFFFFFFFFFFFFFFFFFFFFFFFFFFFFFFFFFFFFFFFFFFFFFFF  
@A00155:342:HHGFNDSXY:1:2559:29966:32064 1:N:0:GAACCTAG+TCCGCATA  
GCAAAATCTTAACATATTAACAAGCAGTGAGACATGGTTATCTGACCATGACCACCTCTGCATAGCGT  
TCACGTGTGTAGACCACACGTGAGTCTGTAATCCTGCTGTCTGCTTAAGAGCATCTGCCAGGTT  
+  
FFFFF:FFFFFFF:FFFFFFFFFFFFFFFFFFFFFFFFFFFFFFFFF  
FFFFFFFFFFFFFFFFFFFFFFFFFFFFFFFFF:F:FFFFFFFFFFFFFFFFFFFFFFFFF  
@A00155:342:HHGFNDSXY:1:2171:22254:12571 2:N:0:GAACCTAG+TCCGCATA  
GCAAAATCTTAACATATTAACAAGCAGTGAGACATGGTTATCTGACCATGACCACCTCTGCATAGCGT  
TCACGTGTGTAGACCACACGTGAGTCTGTAATCCTGCTGTCTGCTTAAGAGCATCTGCCAGGTT  
+  
F,:FF,FFF:, ,FFFFFFFFF:F:F,FF:FFFFFF::FFFFFF::FF:FF,FFF:FFFFFF:FFF  
F:,FFFFFFFFF::FF,FFFFFF:FFF,FFFFFFFFF:FFFFFFFFF,F:FFFFFF:FF  
@A00155:342:HHGFNDSXY:1:1526:10113:17816 2:N:0:GAACCTAG+TCCGCATA  
GCAAAATCTTAACATATTAACAAGCAGTGAGACATGGTTATCTGACCATGACCACCTCTGCATAGCGT  
TCACGTGTGTAGACCACACGTGAGTCTGTAATCCTGCTGTCTGCTTAAGAGCATCTGCCAGGTTAGTT  
+  
FFFFF:FFFFFFF:FFFFFFF:FFFFFFFFFFFFFFFFFFFFFFFFF  
FFFFF:FFFFFFFFFFFFFFFFFFFFFFFFFFFFFFFFF  
@A00155:342:HHGFNDSXY:1:1526:10791:19022 2:N:0:GAACCTAG+TCCGCATA  
GCAAAATCTTAACATATTAACAAGCAGTGAGACATGGTTATCTGACCATGACCACCTCTGCATAGCGT  
TCACGTGTGTAGACCACACGTGAGTCTGTAATCCTGCTGTCTGCTTAAGAGCATCTGCCAGGTTAGTT  
+

FFFFF:FFFFF:,FFFF,,FF:FFFFF:FFFFF:FFFFFFFFFF,FFFFFFFFFFFFFF:FFFFF  
FFFFFFFFFFFFFFFF:FFFFFFFFFFFFFFFF:FFFFFFFFFFFFFFFFFFFFFFFFFFFFF  
@A00155:342:HHGFNDSXY:1:1620:21079:25347 2:N:0:GAACCTAG+TCCGCATA  
GCAAAATCTTAACATATTAACAAGCAGTGAGACATGGTTATCTGACCATGACCACCTCTGCATAGCGT  
TCACGTGTGTAGACCACACGTGAGTCTGTAATCCTGCTGTCTGCTTAAGAGCATCTGCCAGGTTAGTT  
+  
FFFFFFFFFFFFFFFFFFFFFFFF:FFFFFFFFFFFFFFFFFFFFFFFFFFFFFFFFFFFFFFFFFFFFF  
FFFFFFFFFFFFFFFFFFFFFFFFFFFFFFFFFFFFFFFFFFFFFFFFFFFFFFFFFFFFFFFFFFFFF  
@A00155:342:HHGFNDSXY:1:1611:20907:20729 2:N:0:GAACCTAG+TCCGCATA  
GCAAAATCTTAACATATTAACAAGCAGTGAGACATGGTTATCTGACCATGACCACCTCTGCATAGCGT  
TCACGTGTGTAGACCACACGTGAGTCTGTAATCCTGCTGTCTGCTTAAGAGCATCTGCCAGGTTAGTT  
+  
FFFFFFF:FFFFFFFFFFFFFFFFFFFFFFFFFFFFFFFFFFFFFFFFFFFFF:FFFF:FFFFFFFFFFFFF  
FFFFFFFFFFFFFFFFFFFFFFFFFFFFFFFFFFFFFFFFFFFFFFFFFFFFFFFFFFFFFFFFFFFFF:FFFFFFF  
@A00155:342:HHGFNDSXY:1:1345:25391:21449 2:N:0:GAACCTAG+TCCGCATA  
GCAAAATCTTAACATATTAACAAGCAGTGAGACATGGTTATCTGACCATGACCACCTCTGCATAGCGT  
TCACGTGTGTAGACCACACGTGAGTCTGTAATCCTGCTGTCTGCTTAAGAGCATCTGCCAGGTTAGTT  
+  
FFF:FFFFFFFF:FFFF:FFFFFFFFFFFFFFFFFFFFFFFFFFFFFFFFFFFFFFFFFFFFFFFFFFFFF  
FFFFFFFFFFFFFFFFFFFFFFFFFFFFFFFFFFFFFFFFFFFFFFFFFFFFFFFFFFFFFFFFFFFFF:FFFFFFFFFFFFF  
@A00155:342:HHGFNDSXY:1:2667:21947:6527 1:N:0:GAACCTAG+TCCGCATA  
ATCTTAACATATTAACAAGCAGTGAGACATGGTTATCTGACCATGACCACCTCTGCATAGCGTTCACG  
TGTGTAGACCACACGTGAGTCTGTAATCCTGCTGTCTGCTTAAGAGCATCTGCCAGGTTAGTTA  
+  
FFFFFFFFFFFFFFFFFFFFFFF:FFFFFFFFFFFFFFFFFFFFF:FFFFFFFFF:FFFFFFFFFFFFFFF:FFFFF  
FFFFFFFFFFFFFFFFFFFFFFFFFFFFFFFFFFFFFFFFFFFFFFFFFFFFFFFFFFFFFFFFFFFFF  
@A00155:342:HHGFNDSXY:1:2162:12427:7827 1:N:0:GAACCTAG+TCCGCATA  
ATCTTAACATATTAACAAGCAGTGAGACATGGTTATCTGACCATGACCACCTCTGCATAGCGTTCACG  
TGTGTAGACCACACGTGAGTCTGTAATCCTGCTGTCTGCTTAAGAGCATCTGCCAGGTTAGTTATGTT  
+  
FFFFFFFFFFFFFFF:FFFFFFFFFFFFFFFFFFFFFFFFFFFFFFFFFFFFFFFFFFFFFFFFFFFFFFFFFFFFF:FFF  
FFFFFFFFFFFFFFFFFFFFFFFFFFFFFFFFFFFFFFFFFFFFFFFFFFFFFFFFFFFFFFFFFFFFF  
@A00155:342:HHGFNDSXY:1:1622:3631:2362 2:N:0:GAACCTAG+TCCGCATA  
ATCTTAACATATTAACAAGCAGTGAGACATGGTTATCTGACCATGACCACCTCTGCATAGCGTTCACG  
TGTGTAGACCACACGTGAGTCTGTAATCCTGCTGTCTGCTTAAGAGCATCTGCCAGGTTAGTTATGTT  
+  
FFFFFFFFFFFFFFFFFFFFFFFFFFFFFFFFFFFFFFFFFFFFFFFFFFFFFFFFFFFFFFFFFFFFFFFFF  
FFFFFFFFFFFFFFFFFFFFFFFFFFFFFFFFFFFFFFFFFFFFFFFFFFFFFFFFFFFFFFFFFFFFF:F  
@A00155:342:HHGFNDSXY:1:2162:11794:9017 1:N:0:GAACCTAG+TCCGCATA  
ATCTTAACATATTAACAAGCAGTGAGACATGGTTATCTGACCATGACCACCTCTGCATAGCGTTCACG  
TGTGTAGACCACACGTGAGTCTGTAATCCTGCTGTCTGCTTAAGAGCATCTGCCAGGTTAGTTATGTT  
+  
FFFFFFFFFFFFFFFFFFFFFFFFFFFFFFFFFFFFFFFFFFFFFFFFFFFFFFFFFFFFFFFFFFFFFFFFF:  
FFFFFFFFFFFFFFFFFFFFFFFFFFFFFFFFFFFFFFFFFFFFFFFFFFFFFFFFFFFFFFFFFFFFF  
@A00155:342:HHGFNDSXY:1:2162:11749:9064 1:N:0:GAACCTAG+TCCGCATA  
ATCTTAACATATTAACAAGCAGTGAGACATGGTTATCTGACCATGACCACCTCTGCATAGCGTTCACG  
TGTGTAGACCACACGTGAGTCTGTAATCCTGCTGTCTGCTTAAGAGCATCTGCCAGGTTAGTTATGTT  
+  
FFFFFFFFF:FFFFF,FFFFFFFFFFFFFFFFFFFFFFFFFFFFFFFFFFFFFFFFFFFFFFFFFFFFFFFFF  
FFFFFFFFFFFFFFFFFFFFFFFFFFFFFFFFFFFFFFFFFFFFFFFFFFFFFFFFFFFFFFFFFFFFF:F  
@A00155:342:HHGFNDSXY:1:2417:17327:16658 2:N:0:GAACCTAG+TCCGCATA  
ATCTTAACATATTAACAAGCAGTGAGACATGGTTATCTGACCATGACCACCTCTGCATAGCGTTCACG  
TGTGTAGACCACACGTGAGTCTGTAATCCTGCTGTCTGCTTAAGAGCATCTGCCAGGTTAGTTATGTT  
+

FF:FFFFFFFFFFFFFFFFFFFFFFFFFFFFFFFFFFFFFFFFFFFFFFFFFFFFFFFFFFFFF:FFFFFFFF:FFFFFF  
 @A00155:342:HHGFNDSDXY:1:1652:8531:25379 2:N:0:GAACCTAG+TCCGCATA  
 TCTTAACATATTAACAAGCAGTGAGACATGGTTATCTGACCATTGCCAGGTTCACGTGTGTAGACCACACGTGAGTCTGTAATCCTGCTGTCTGCTTAAGAGCATCTGCCAGGTAGTTATGTTT  
 +  
 FF:FFF:FFFFFFFFFFFFFFFFFFFFFFFFFFFFFFFFFFFFFFFFFFFFFFFFFFFFFFFF:F:FFF:F,F,FFFFFFFFFFFFFFFFFFFFFFFF:  
 FFFF:FFF,F,FFFFFFFFFFFFFFFFFFFFFFFFFFFFFFFFFFFFFFFFFFFFFFFFFFFFFFFF:F:FFF:FFF,F,FFFFFFFF  
 @A00155:342:HHGFNDSDXY:1:2430:9706:21621 1:N:0:GAACCTAG+TCCGCATA  
 TCTTAACATATTAACAAGCAGTGAGACATGGTTATCTGACCATTGCCAGGTTCACGTGTGTAGACCACACGTGAGTCTGTAATCCTGCTGTCTGCTTAAGAGCATCTGCCAGGTAGTTATGTTT  
 +  
 FFFF:FF:FFFFFFFF:F:FFF:F,F,FFFFFFFFFFFFFFFFFFFFFFFF:F,FFFF:FFF,F,FFFFFFFF  
 FFFFFFFFF:FFFFFFFFFFFFFFFFFFFFFFFFFFFFFFFFFFFFFFFFFFFFFFFF:F,F,FFF:FFF,F,FFFFFFFF  
 @A00155:342:HHGFNDSDXY:1:2669:28320:35383 1:N:0:GAACCTAG+TCCGCATA  
 TCTTAACATATTAACAAGCAGTGAGACATGGTTATCTGACCATTGCCAGGTTCACGTGTGTAGACCACACGTGAGTCTGTAATCCTGCTGTCTGCTTAAGAGCATCTGCCAGGTAGTTATGTTT  
 +  
 :F:FF,F:FFFFFFFF,F,FFFFFFFF:F,FF,FFFF,,FFFF,FFFFFFFF:FFF:F:FF  
 FFFF:FFF:FF,: ,FFF,FF,FFFF,FFF:FFFFFFFF:FFFFFFFF,,FF,FFFFFFFF  
 @A00155:342:HHGFNDSDXY:1:1635:8513:21590 1:N:0:GAACCTAG+TCCGCATA  
 TTAACATATTAACAAGCAGTGAGACATGGTTATCTGACCATTGCCAGGTTCACGTGTGTAGACCACACGTGAGTCTGTAATCCTGCTGTCTGCTTAAGAGCATCTGCCAGGTAGTTATGTTTACC  
 +  
 FFFF:FFFFFFFF:FFFFFFFFFFFFFFFF,FF:FFFFFFFFFFFFFFFF:FFFFFFFFFFF:F  
 F:FFFFFFFFFFFFFFFFFFFFFFFFFFFFFFFFFFFFFFFFFFFFFFFFFFFFFFFF,FF,FFFFFFFF  
 @A00155:342:HHGFNDSDXY:1:2278:13431:32988 1:N:0:GAACCTAG+TCCGCATA  
 TAACATATTAACAAGCAGTGAGACATGGTTATCTGACCATTGCCAGGTTCACGTGTGTAGACCACACGTGAGTCTGTAATCCTGCTGTCTGCTTAAGAGCATCTGCCAGGTAGTTATGTTTACC  
 +  
 FFFFFFFFFFFFFFFFFFFFFFFFFFFFFFFFFFFFFFFFFFFFFFFFFFFFFFFFFFFFFFFFFFFFFFFFFF  
 FFFFFFFFFFFFFFFFFFFFFFFFFFFFFFFFFFFFFFFFFFFFFFFFFFFFFFFFFFFFFFFFF:FFFFFFFF:FFFFFFFF  
 @A00155:342:HHGFNDSDXY:1:2412:4047:30232 1:N:0:GAACCTAG+TCCGCATA  
 TAACATATTAACAAGCAGTGAGACATGGTTATCTGACCATTGCCAGGTTCACGTGTGTAGACCACACGTGAGTCTGTAATCCTGCTGTCTGCTTAAGAGCATCTGCCAGGTAGTTATGTTTACC  
 +  
 FFFFFFFFFFFFFFFFFFFFFFFFFFFFFFFFFFFFFFFFFFFFFFFFFFFFFFFFFFFFFFFFFFFFFFFFFF:FFFFFFFF  
 FFFFFFFFFFFFFFFFFFFFFFFFFFFFFFFFFFFFFFFFFFFFFFFFFFFFFFFFFFFFFFFFF:FFFF:FF,F:FFFFFFFF  
 @A00155:342:HHGFNDSDXY:1:2412:4246:30295 1:N:0:GAACCTAG+TCCGCATA  
 TAACATATTAACAAGCAGTGAGACATGGTTATCTGACCATTGCCAGGTTCACGTGTGTAGACCACACGTGAGTCTGTAATCCTGCTGTCTGCTTAAGAGCATCTGCCAGGTAGTTATGTTTACC  
 +  
 FFFFFFFFFFFFFFFFFFFFFFFFFFFFFFFFFFFFFFFFFFFFFFFFFFFFFFFFFFFFFFFFF:F:FFFFFFFFFFFFFFFFFFFFFFFF:~FFFFFFFF  
 FFFF:FFF:FFFFFFFFFFFFFFFFFFFFFFFFFFFFFFFFFFFFFFFFFFFFFFFF:FFFFFFFF,FFFF,FFFF  
 @A00155:342:HHGFNDSDXY:1:2330:2049:26209 1:N:0:GAACCTAG+TCCGCATA  
 AACATATTAACAAGCAGTGAGACATGGTTATCTGACCATTGCCAGGTTCACGTGTGTAGACCACACGTGAGTCTGTAATCCTGCTGTCTGCTTAAGAGCATCTGCCAGGTAGTTATGTTTACC  
 +  
 FFFFFFFFFFFFFFFFFFFFFFFFFFFFFFFFFFFFFFFFFFFFFFFFFFFFFFFFFFFFFFFFFFFFFFFFFF  
 FFFFFFFFFFFFFFFFFFFFFFFFFFFFFFFFFFFFFFFFFFFFFFFFFFFFFFFFFFFFFFFFF,F,FFFFFFFF  
 @A00155:342:HHGFNDSDXY:1:1622:3631:2362 1:N:0:GAACCTAG+TCCGCATA  
 AACATATTAACAAGCAGTGAGACATGGTTATCTGACCATTGCCAGGTTCACGTGTGTAGACCACACGTGAGTCTGTAATCCTGCTGTCTGCTTAAGAGCATCTGCCAGGTAGTTATGTTTACCG



```
F, FFFFFFFFFFFFFFFFFFFFFFFFFFFFFFFFFFFFFFFFFFFFFFFFFFFFFFFFFFFFFFFFFF, FF: FFFFFFFFFF:
FFFFFFFFFFFFFFFFFFFFFFFFFFFFFFFFFFFFFFFFFFFFFFFFFFFFFFFFFFFFFFFFFF, FF: FFFFFFFFFF:
@A00155:342:HHGFNDSXY:1:2275:31015:35321 2:N:0:GAACCTAG+TCCGCATA
CATATTAACAAGCAGTGAGACATGGTTATCTGACCATGACCACCTCTGCATAGCGTTCACGTGTGTAG
ACCACACGTGAGTCTGTAATCCTGCTGTCTGCTTAAGAGCATCTGCCAGGTTAGTTATGTTTAC
+
FFFFF:FFF, FFFFFFFFFFFFFFFFFFFFFFFFFFFFFFFFFFFFFFFFFFFFFFFFFFFFFFFF
FFFFFFFFFFFFFFFFFFFFFFFFFFFFFFFFFFFFFFFFFFFFFFFFFFFFFFFFFFFFFFFF:FF
@A00155:342:HHGFNDSXY:1:2361:16143:30953 1:N:0:GAACCTAG+TCCGCATA
CATATTAACAAGCAGTGAGACATGGTTATCTGACCATGACCACCTCTGCATAGCGTTCACGTGTGTAG
ACCACACGTGAGTCTGTAATCCTGCTGTCTGCTTAAGAGCATCTGCCAGGTTAGTTATGTTTACC
+
FFFFFFFFFFFFFFFFFFFFFFFFFFFFFFFFFFFFFFFFFFFFFFFFFFFFFFFFFFFFFFFFF
FFFFFFFFFFFFFFFFFFFFFFFFFFFFFFFFFFFFFFFFFFFFFFFFFFFFFFFFFFFFFFFFF
@A00155:342:HHGFNDSXY:1:1631:8675:30796 1:N:0:GAACCTAG+TCCGCATA
ATTAACAAGCAGTGAGACATGGTTATCTGACCATGACCACCTCTGCATAGCGTTCACGTGTGTAGACC
ACACGTGAGTCTGTAATCCTGCTGTCTGCTTAAGAGCATCTGCCAGGTTAGTTATGTTTACCGTCCCC
+
FFFFFFFFFFFFFFFFFFFFFFFFFFFFFFFFFFFFFFFFFFFFFFFFFFFFFFFFFFFFFFFFF
, FFFFFFFFFFFFFFFFFFFFFFFFFFFFFFFFFFFFFFFFFFFFFFFFFFFFFFFFF: : FFFFFFFFFF
@A00155:342:HHGFNDSXY:1:1641:31222:4429 2:N:0:GAACCTAG+TCCGCATA
ATTAACAAGCAGTGAGACATGGTTATCTGACCATGACCACCTCTGCATAGCGTTCACGTGTGTAGACC
ACACGTGAGTCTGTAATCCTGCTGTCTGCTTAAGAGCATCTGCCAGGTTAGTTATGTTTACCGTCCCC
+
FFFFF: : FFFFFFFFFFFFFFFFFFFFFFFFFFFFFFFFFFFFFFFFFFFFFFFFFFFFFFFF
: FFFFFFFFFFFFFFFFFFFFFFFFFFFFFFFFFFFFFFFFFFFFFFFFFFFFFFFFF: FFFFFFFFFF
@A00155:342:HHGFNDSXY:1:2202:15790:9643 1:N:0:GAACCTAG+TCCGCATA
TTAACAAGCAGTGAGACATGGTTATCTGACCATGACCACCTCTGCATAGCGTTCACGTGTGTAGACCA
CACGTGAGTCTGTAATCCTGCTGTCTGCTTAAGAGCATCTGCCAGGTTAGTTATGTTTACCGTCCCCT
+
FFFFFFFF: : FFFFFFFFF: : FF, FFFFFFFF, FFFF: FFFFFFFF, F: FFFFFFF: : F: F: FFFF
FFF: F: F, , FF, FF: F: FFFF, FFF: FFFFFFFFFF: FF, FFF, , , FFFFFFFF: FFFFFFF: FFF
@A00155:342:HHGFNDSXY:1:1148:30255:21887 1:N:0:GAACCTAG+TCCGCATA
TTAACAAGCAGTGAGACATGGTTATCTGACCATGACCACCTCTGCATAGCGTTCACGTGTGTAGACCA
CACGTGAGTCTGTAATCCTGCTGTCTGCTTAAGAGCATCTGCCAGGTTAGTTATGTTTACCGTCCCCT
+
FFFFFFFFFFFFFFFFFFFFFFFFFFFFFFFFFFFFFFFFFFFFFFFFFFFFFFFFFFFFFFFFF
FFFF: FFFFFFFFFFFFFFFFFFFFFFFFFFFFFFFFFFFFFFFFFFFFFFFFFFFFFFFFF: FFFFFFFFFF
@A00155:342:HHGFNDSXY:1:1538:3052:29074 1:N:0:GAACCTAG+TCCGCATA
TTAACAAGCAGTGAGACATGGTTATCTGACCATGACCACCTCTGCATAGCGTTCACGTGTGTAGACCA
CACGTGAGTCTGTAATCCTGCTGTCTGCTTAAGAGCATCTGCCAGGTTAGTTATGTTTACCGTCCCCT
+
FFFFFFFFFFFFFFFFFFFFFFFFFFFFFFFFFFFFFFFFFFFFFFFFFFFFFFFFFFFFFFFFF
FFFFFFFF: FFFFFFFFFFFFFFFFFFFFFFFFFFFFFFFFFFFFFFFFFFFFFFFFF: FFF: FFF: FFFFFFF: FFFFFFFF
@A00155:342:HHGFNDSXY:1:1268:14733:16799 2:N:0:GAACCTAG+TCCGCATA
TAACAAGCAGTGAGACATGGTTATCTGACCATGACCACCTCTGCATAGCGTTCACGTGTGTAGACCAC
ACGTGAGTCTGTAATCCTGCTGTCTGCTTAAGAGCATCTGCCAGGTTAGTTATGTTTACCGTCCCCT
+
F: FFF: FFFFFFFFFFFFFFFFFFFFFFFFFFFFFFFFFFFFFFFFFFFFFFFFFFFFFFFF
FFFFFFFFFFFFFFFFFFFFFFFFFFFFFFFFFFFFFFFFFFFFFFFFFFFFFFFFFFFFFFFFF
@A00155:342:HHGFNDSXY:1:2428:27127:29622 2:N:0:GAACCTAG+TCCGCATA
AACAAAGCAGTGAGACATGGTTATCTGACCATGACCACCTCTGCATAGCGTTCACGTGTGTAGACCACA
CGTGAGTCTGTAATCCTGCTGTCTGCTTAAGAGCATCTGCCAGGTTAGTTATGTTTACCGTCCCCTCA
+
```

```
FFF:FFF,FFFFFFFFFFFFFFFFFFFFFFFFFFFFFFFFFFFFFFFFFFFFF:FFFFFFFFFFFFFFFFFFFFFFFFFFFFFFFFFFFFFF  
FFFFFFFFFFFFFFFFFFFF:FFFFFFFFFFFFFFFFFFFFFFFFFFFFFFFFFFFFFFFFFFFFFFFFFFFFFFFFFFFFFFFFFFFFFFFF  
@A00155:342:HHGFNDSXY:1:2453:25852:24909 2:N:0:GAACCTAG+TCCGCATA  
ACAAGCAGTGAGACATGGTTATCTGACCATGACCACCTCTGCATAGCGTTCACGTGTGTAGACCACA  
CGTGAGTCTGTAATCCTGCTGTCTGCTTAAGAGCATCTGCCAGGTTAGTTATGTTTTACCGTCCCCTCA  
+  
FFF,FFFFFFFFFFFFFFFFFFFFFFFFFFFFFFFFFFFFFFFFFFFFFFFFFFFFFFFFFFFFFFFFFFFFFFFFFFFFFFFFFFFFF  
FF:FFFFFFFFFFFFFFFFFFFFFFFFFFFFFFFFFFFFFFFFFFFFFFFFFFFFFFFFFFFFFFFFFFFFFFFFFFFFFFFFFFFFF  
@A00155:342:HHGFNDSXY:1:1623:18394:4319 2:N:0:GAACCTAG+TCCGCATA  
ACAAGCAGTGAGACATGGTTATCTGACCATGACCACCTCTGCATAGCGTTCACGTGTGTAGACCACA  
CGTGAGTCTGTAATCCTGCTGTCTGCTTAAGAGCATCTGCCAGGTTAGTTATGTTTTACCGTCCCCTCA  
+  
FFFF,FFFFFFFF:FFFFFFFFFFFFFFFFFFFFFFFFFFFFFFFFFFFFFFFF:F:FFFF,FFFFFFFFFFFFFFFFFFFFFFF  
FF:FFFFFFFFFFFFFFFFFFFFFFFFFFFFFFFFFFFFFFFFFFFFFFFFFFFFFFFFFFFFFFFFFFFFFFFFFFFFFFFFFFFFF  
@A00155:342:HHGFNDSXY:1:2345:28528:1172 2:N:0:GAACCTAG+TCCGCATA  
CAAGCAGTGAGACATGGTTATCTGACCATGACCACCTCTGCATAGCGTTCACGTGTGTAGACCACACG  
TGAGTCTGTAATCCTGCTGTCTGCTTAAGAGCATCTGCCAGGTTAGTTATGTTTTACCGTCCCCTCAGG  
+  
F:FFFFFFFFFFFFFFFFFFFFFFFFFFFFFFFFFFFFFFFFFFFF:F:FFFFFFFFFFFFFFFFFFFFFFFFFFFFFFFFFFFF  
FFFFFFFFFFFFFFFFFFFFFFFFFFFFFFFFFFFFFFFFFFFFFFFFFFFFFFFFFFFFFFFFFFFFFFFFFFFFFFFFFFFFF  
@A00155:342:HHGFNDSXY:1:2344:9245:36573 2:N:0:GAACCTAG+TCCGCATA  
CAAGCAGTGAGACATGGTTATCTGACCATGACCGCCTCTGCATAGCGTTCACGTGTGTAGACCACACG  
TGAGTCTGTAATCCTGCTGTCTGCTTAAGAGCATCTGCCAGGTTAGTTATGTTTTACCGTCCCCTCAGG  
+  
:FFFFFFFFFFFFFFF,FFFFFFFFFFFFFFFFFFFFFFFFFFFFFFFFFFFF:FFFFFFFFFFFFFF,F:FFFF,F:FFFF  
FFFFFFFFFFFF:F:FFFF:F:FFFF:FFFFFFFFFFFFFFFFFFFFFF:FFFFFFFFFFFFFFFFFFFFFF,F:FFFF:FFFF  
@A00155:342:HHGFNDSXY:1:2116:25211:27305 2:N:0:GAACCTAG+TCCGCATA  
AAGCAGTGAGACATGGTTATCTGACCATGACCACCTCTGCATAGCGTTCACGTGTGTAGACCACACGT  
GAGTCTGTAATCCTGCTGTCTGCTTAAGAGCATCTGCCAGGTTAGTTATGTTTTACCGTCCCCTCAGGG  
+  
FFFFFFFFFFFFFFFFFFFFFFFFFFFFFFFFFFFFFFFFFFFFFFFFFFFF:FFFFFFFFFFFFFFFFFFFFFF:FFFFFFF  
FFFFF:FFFFFFFFFFFFFFFFFFFFFFFFFFFFFFFFFFFFFFFFFFFFFFFFFFFFFFFFFFFFFFFFFFFFFFFFFFFFFFFFFFFF  
@A00155:342:HHGFNDSXY:1:1538:20283:32612 2:N:0:GAACCTAG+TCCGCATA  
AAGCAGTGAGACATGGTTATCTGACCATGACCACCTCTGCATAGCGTTCACGTGTGTAGACCACACGT  
GAGTCTGTAATCCTGCTGTCTGCTTAAGAGCATCTGCCAGGTTAGTTATGTTTTACCGTCCCCTCAGGG  
+  
:FFFFFFFFFFFFFFFFFFFFFFFFFFFFFFFFFFFFFFFFFFFF:FFFFFFFFFFFFFFFFFFFFFF:  
FFFFFFFFFFFFFFFFFFFFFFFFFFFFFFFFFFFFFFFFFFFFFFFFFFFFFFFFFFFFFFFFFFFFFFFFFFFFFFFFFFFFF  
@A00155:342:HHGFNDSXY:1:2112:25771:14497 2:N:0:GAACCTAG+TCCGCATA  
AGCAGTGAGACATGGTTATCTGACCATGACCACCTCTGCATAGCGTTCACGTGTGTAGACCACACGTG  
AGTCTGTAATCCTGCTGTCTGCTTAAGAGCATCTGCCAGGTTAGTTATGTTTTACCGTCCCCTCAGGGG  
+  
FFFFFFFFFFFFFFFFFFFFFFFFFFFF:FFFFFFFFFFFFFFFFFFFFFF:FFFFFFFFFFFFFFFFFFFFFF:  
FFFF:FFFFFF:FFFFFFFFFFFFFFFFFFFFFFFFFFFFFFFFFFFFFFFFFFFFFFFFFFFF:FFFFFFFFFFFFFF  
@A00155:342:HHGFNDSXY:1:2247:32515:18818 2:N:0:GAACCTAG+TCCGCATA  
CAGTGAGACATGGTTATCTGACCATGACCACCTCTGCATAGCGTTCACGTGTGTAGACCACACGTGAG  
TCTGTAATCCTGCTGTCTGCTTAAGAGCATCTGCCAGGTTAGTTATGTTTTACCGTCCCCTCAGGGGTC  
+  
FFFFFFFFFFFFFFFFFFFFFF::FFFFFFFFF:FFFFFFFFFFFFFFFFFFFFFFFFFFFFFFFFFFFFFF:FFFFFFF  
:::FFF:FFFFFFFFFFFFFFFFFFFF,FFFFFFFFF:FFFFFFF:FFFFFF:,FFFFFFFFFFFF,FFFFFFF  
@A00155:342:HHGFNDSXY:1:1419:22724:7341 1:N:0:GAACCTAG+TCCGCATA  
CAGTGAGACATGGTTATCTGACCATGACCACCTCTGCATAGCGTTCACGTGTGTAGACCACACGTGAG  
TCTGTAATCCTGCTGTCTGCTTAAGAGCATCTGCCAGGTTAGTTATGTTTTACCGTCCCCTCAGGGGTC
```

[illegible]

FFFFF:FFFFFFFF:FFFF:FFFFFFFF:FFFFFFFF:FFFFFFFF:FFFFFFFF:FFFFFFFF  
F:FFFFFFFFFFFFFFFFFFFFFFFF, :FFF:FFFFFFFF:FFFFFFFFFFFFFFFF  
@A00155:342:HHGFNDSXY:1:2116:28537:30123 2:N:0:GAACCTAG+TCCGCATA  
GAGACATGGTTATCTGACCATGACCACCTCTGCATAGCGTTCACGTGTGTAGACCACACGTGAGTCTG  
TAATCCTGCTGTCTGCTTAAGAGCATCTGCCAGGTTAGTTATGTTTACCGTCCCCTCAGGGGTCAAGA  
+  
FFFFF,FF:FFFFFFFFFFFFFFFF:FFFFFFFF:FFFFFFFFFFFFFFFFFFFFFFFFFFFFFFFF  
FF,FFFFFFFFFFFFFFFFFFFFFFFFFFFFFFFF:FF:FFFFFFFFFFFFFFFF,FFFFFFFF  
@A00155:342:HHGFNDSXY:1:2445:16495:33317 2:N:0:GAACCTAG+TCCGCATA  
AGACATGGTTATCTGACCATGACCACCTCTGCATAGCGTTCACGTGTGTAGACCACACGTGAGTCTGT  
AATCCTGCTGTCTGCTTAAGAGCATCTGCCAGGTTAGTTATGTTTACCGTCCCCTCAGGGGTCAAGA  
+  
FFFFFFFFFFFFFFFFFFFFFFFFFFFFFFFF,FFFFFFFFFFFFFFFFFFFFFFFF:FFFFFFFFFFFF  
FFFFF:FFFFFFFFFFFFFFFF:FFFFFFFFFFFF:FFF:FFFFFFFF:FFFFFFFFFFFF  
@A00155:342:HHGFNDSXY:1:1652:8531:25379 1:N:0:GAACCTAG+TCCGCATA  
GACATGGTTATCTGACCATGACCACCTCTGCATAGCGTTCACGTGTGTAGACCACACGTGAGTCTGTA  
ATCCTGCTGTCTGCTTAAGAGCATCTGCCAGGTTAGTTATGTTTACCGTCCCCTCAGGGGTCAAGAAT  
+  
FFFFFFFFFFFFFFFFFFFFFFFFFFFFFFFF:FFF:FF:FFFFFFFFFFFFFFFFFFFFFFFFFFFFFFFF:FF  
FFFFFFFFFFFFFFFFFFFFFFFFFFFFFFFF:FFFFFFFFFFFFFFFFFFFFFFFFFFFFFFFF:FFFFFF:FFFF  
@A00155:342:HHGFNDSXY:1:2367:13386:22169 2:N:0:GAACCTAG+TCCGCATA  
ATGTTATCTGACCATGACCACCTCTGCATAGCGTTCACGTGTGTAGACCACACGTGAGTCTGTAATC  
CTGCTGTCTGCTTAAGAGCATCTGCCAGGTTAGTTATGTTTACCGTCCCCTCAGGGGTCAAGAATTGC  
+  
:FFFFFFFFFFFFFFFFFFFFFFFFFFFFFFFFFFFFFFFFFFFFFFFFFFFFFFFFFFFFFFFFFFFF  
FFFFFFFFFFFFFFFFFFFFFFFFFFFFFFFFFFFFFFFFFFFFFFFFFFFFFFFFFFFFFFFFFFFF:FFFFFF  
@A00155:342:HHGFNDSXY:1:2214:15447:7889 2:N:0:GAACCTAG+TCCGCATA  
GGTTATCTGACCATGACCACCTCTGCATAGCGTTCACGTGTGTAGACCACACGTGAGTCTGTAATCCT  
GCTGTCTGCTTAAGAGCATCTGCCAGGTTAGTTATGTTTACCGTCCCCTCAGGGGTCAAGAATT  
+  
FFFFFFFFFFFFFFFFFFFFFFFFFFFFFFFFFFFFFFFFFFFFFFFFFFFFFFFFFFFFFFFFFFFF  
FFFFFFFFFFFFFFFFFFFFFFFFFFFFFFFFFFFFFFFFFFFFFFFFFFFFFFFFFFFFFFFFFFFF:FFFFF  
@A00155:342:HHGFNDSXY:1:1242:27498:14606 2:N:0:GAACCTAG+TCCGCATA  
GTTATCTGACCATGACCACCTCTGCATAGCGTTCACGTGTGTAGACCACACGTGAGTCTGTAATCCTG  
CTGTCTGCTTAAGAGCATCTGCCAGGTTAGTTATGTTTACCGTCCCCTCAGGGGTCAAGAATTGCTTT  
+  
FFFFFFFFFFFFFFFFFFFFFFFFFFFFFFFFFFFFFFFF:FFFFFFFFFFFFFFFFFFFFFFFFFFFFFFFF  
FFFFFFFFFFFF:FFFFFFFFFFFFFFFFFFFFFFFFFFFFFFFF:FFFFFFFFFFFFFFFFFFFFFFFF  
@A00155:342:HHGFNDSXY:1:2552:10917:19085 2:N:0:GAACCTAG+TCCGCATA  
ATCTGACCATGACCACCTCTGCATAGCGTTCACGTGTGTAGACCACACGTGAGTCTGTAATCCTGCTG  
TCTGCTTAAGAGCATCTGCCAGGTTAGTTATGTTTACCGTCCCCTCAGGGGTCAAGAATTGCTTTGAG  
+  
FFFFFFFFFFFFFFFFFFFF:FFFFFFFFFFFFFFFFFFFFFFFFFFFFFFFFFFFFFFFFFFFFFFFFFFFF  
FFFFFFFFFFFFFFFFFFFFFFFFFFFFFFFFFFFFFFFFFFFFFFFFFFFFFFFFFFFFFFFFFFFF  
@A00155:342:HHGFNDSXY:1:2430:9706:21621 2:N:0:GAACCTAG+TCCGCATA  
TGACCATGACCACCTCTGCATAGCGTTCACGTGTGTAGACCACACGTGAGTCTGTAATCCTGCTGTCT  
GCTTAAGAGCATCTGCCAGGTTAGTTATGTTTACCGTCCCCTCAGGGGTCAAGAATTGCTTTGA  
+  
FFFFFFFFFFFFFFFFFFFFFFFFFFFFFFFFFFFFFFFFFFFFFFFFFFFFFFFFFFFFFFFFFFFF  
FFFFFFFFFFFF:FFFFF:FFFFFFFFFFFFFFFFFFFFFFFFFFFFFFFF:FFFFFFFFFFFFFFFFFFFF:  
@A00155:342:HHGFNDSXY:1:2245:23710:10989 2:N:0:GAACCTAG+TCCGCATA  
GACCATGACCACCTCTGCATAGCGTTCACGTGTGTAGACCACACGTGAGTCTGTAATCCTGCTGTCTG  
CTTAAGAGCATCTGCCAGGTTAGTTATGTTTACCGTCCCCTCAGGGGTCAAGAATTGCTTTGAGAGTC  
+

[illegible]

FFFFFFFFFFFFFFFFFFFFFFFFFFFFFFFFFFFFFFFFFFFFFFFFFFFFFFFFFFFFFFFFFFFFFFFF  
FFFFFFFFFFFFFFFFFFFFFFFFFFFFFFFFFFFFFFFFFFFFFFFFFFFFFFFFFFFFFFFFFFFFFFFF  
@A00155:342:HHGFNDSXY:1:1306:18439:6809 2:N:0:GAACCTAG+TCCGCATA  
ACCACCTCTGCATAGCGTTCACGTGTGTAGACCACACGTGAGTCTGTAATCCTGCTGTCTGCTTAAGA  
GCATCTGCCAGGTTAGTTATGTTTACCGTCCCCTCAGGGGTCAAGAATTGCTTTGAGAGTCCATCAAG  
+  
FFFFFFFFFFFFFFFFFFFFFFFFFFFFFFFFFFFFFFFFFFFFFFFFFFFFFFFFFFFFFFFFFFFFFFFF  
FFFFFFFFFFFFFFFFFFFFFFFFFFFFFFFFFFFFFFFFFFFFFFFFFFFFFFFFFFFFFFFFFFFFFFFF  
@A00155:342:HHGFNDSXY:1:1349:4842:2300 2:N:0:GAACCTAG+TCCGCATA  
CCACCTCTGCATAGCGTTCACGTGTGTAGACCACACGTGAGTCTGTAATCCTGCTGTCTGCTTAAGAG  
CATCTGCCAGGTTAGTTATGTTTACCGTCCCCTCAGGGGTCAAGAATTGCTTTGA  
+  
FFFFFFFFFFFFFFFFFFFFFFFFFFFFFFFFFFFFFFFFFFFFFFFFFFFFFFFFFFFFFFFFFFFFFFFF  
FFFFFFFFFFFFFFFFFFFFFFFFFFFFFFFFFFFFFFFFFFFFFFFFFFFFFFFFFFFFFFFFFFFFFFFF  
@A00155:342:HHGFNDSXY:1:2623:2302:23954 2:N:0:GAACCTAG+TCCGCATA  
CCACCTCTGCATAGCGTTCACGTGTGTAGACCACACGTGAGTCTGTAATCCTGCTGTCTGCTTAAGAG  
CATCTGCCAGGTTAGTTATGTTTACCGTCCCCTCAGGGGTCAAGAATTGCTTTGA  
+  
FFFFF:FFFFFFF::FFFFFFFFFFFF:FFFFFFFFFF:FF,FFFFFFFFFFFF:FFFFFFF:FF,F:FFFFFF  
FFFFFFFFFFFFFFFFFFFFFFFFFFFFFFFFFFFFFFFFFFFFFFFFFFFFFFFFFFFFFFFFFFFFFFFF  
@A00155:342:HHGFNDSXY:1:1312:17381:22983 2:N:0:GAACCTAG+TCCGCATA  
ACCTCTGCATAGCGTTCACGTGTGTAGACCACACGTGAGTCTGTAATCCTGCTGTCTGCTTAAGAGCA  
TCTGCCAGGTTAGTTATGTTTACCGTCCCCTCAGGGGTCAAGAATTGCTTTGAGAGTCCATCAAG  
+  
FFFFFFFFFF,FFFFFFFFFFFFFFFFFFFFFFFFFFFFFFFFFFFFFFFFFFFFFFFFFFFFFFFFFFFFF  
FFFFFFFFFFFFFFFFFFFFFFFFFFFFFFFFFFFFFFFFFFFFFFFFFFFFFFFFFFFFFFFFFFFFFFFF  
@A00155:342:HHGFNDSXY:1:2351:27633:23202 2:N:0:GAACCTAG+TCCGCATA  
ACCTCTGCATAGCGTTCACGTGTGTAGACCACACGTGAGTCTGTAATCCTGCTGTCTGCTTAAGAGCA  
TCTGCCAGGTTAGTTATGTTTACCGTCCCCTCAGGGGTCAAGAATTGCTTTGAGAGTCCATCAAG  
+  
FFFFF,:FFF:FFFFFFFFFFFFFFFFFFFFFFFFFFFFFFFFFFFFFFFFFFFFFFFFFFFFFFFFFFFF:  
FFFFFFFFFFFFFFFFFFFFFFFFFFFFFFFFFFFFFFFFFFFFFFFFFFFFFFFFFFFFFFFFFFFFFFFF  
@A00155:342:HHGFNDSXY:1:1527:17390:2112 2:N:0:GAACCTAG+TCCGCATA  
ACCTCTGCATAGCGTTCACGTGTGTAGACCACACGTGAGTCTGTAATCCTGCTGTCTGCTTAAGAGCA  
TCTGCCAGGTTAGTTATGTTTACCGTCCCCTCAGGGGTCAAGAATTGCTTTGAGAGTCCATCAAGTGA  
+  
FFFFFFFFFFFF:FFFFFFFFFFFFFFFFFFFFFFFFFFFFFFFFFFFFFFFFFFFFFFFFFFFFFFFFFFFF:  
FFFFFFFFFFFFFFFFFFFFFFFFFFFFFFFFFFFFFFFFFFFFFFFFFFFFFFFFFFFFFFFFFFFFFFFF  
@A00155:342:HHGFNDSXY:1:1122:27597:4413 2:N:0:GAACCTAG+TCCGCATA  
CTCTGCATAGCGTTCACGTGTGTAGACCACACGTGAGTCTGTAATCCTGCTGTCTGCTTAAGAGCATC  
TGCCAGGTTAGTTATGTTTACCGTCCCCTCAGGGGTCAAGAATTGCTTTGAGAGTCCATCAAG  
+  
FFFFFFFFFFFFFFFFFFFFFFFFFFFFFFFFFFFFFFFFFFFFFFFFFFFFFFFFFFFFFFFFFFFFFFFFF:  
FFFFFFFFFFFFFFFFFFFFFFFFFFFFFFFFFFFFFFFFFFFFFFFFFFFFFFFFFFFFFFFFFFFFFFFFF  
@A00155:342:HHGFNDSXY:1:2314:27760:31876 2:N:0:GAACCTAG+TCCGCATA  
TCTGCATAGCGTTCACGTGTGTAGACCACACGTGAGTCTGTAATCCTGCTGTCTGCTTAAGAGCATCT  
GCCAGGTTAGTTATGTTTACCGTCCCCTCAGGGGTCAAGAATTGCTTTGAGAGTCCATCAAGTATGA  
+  
FFFFFFFFFFFF:FF::FFFFFFFFFFFF::FFFFF:FFFFFFFFFFFF:FFFFFFFFFFFF:FFF:FFFFFFF  
FFFFF:FFF:FFFFFFFFFFFFFFFFFFFFFFFFFFFFFFFFFFFFFFFFFFFFFFFFFFFFFFFFFFFFF  
@A00155:342:HHGFNDSXY:1:1367:23330:24862 1:N:0:GAACCTAG+TCCGCATA  
TCTGCATAGCGTTCACGTGTGTAGACCACACGTGAGTCTGTAATCCTGCTGTCTGCTTAAGAGCATCT  
GCCAGGTTAGTTATGTTTACCGTCCCCTCAGGGGTCAAGAATTGCTTTGAGAGTCCATCAAGTATGA  
+

FFFFFFFFFFFFFFFFFFFFFFFFFFFFFFFFFFFFFFFFFFFFFFFFFFFFFFFFFFFFFFFFFFFFFFFFFFFFFFFF  
FFFFFFFFFFFFFFFFFFFFFFFFFFFFFFFFFFFFFFFFFFFFFFFFFFFFFFFFFFFFFFFFFFFFFFFFFFFFFFFF  
@A00155:342:HHGFNDSXY:1:2571:26277:27117 2:N:0:GAACCTAG+TCCGCATA  
TCTGCATAGCGTTCACGTGTGTAGACCACACGTGAGTCTGTAATCCTGCTGTCTGCTTAAGAGCATCT  
GCCAGGTTAGTTATGTTTACCGTCCCCTCAGGGGTCAAGAATTGCTTTGAGAGTCCATCAAGTGATGA  
+  
FFFFFF:FFFFFFFFFFFFFFFFFFFFFFFFFFFFFFFFFFFFFFFFFFFFFFFFFFFFFFFFFFFFFFFFFFFFFF  
FFFFFFFFFFFFFFFFFFFFFFFFFFFFFFFFFFFFFFFFFFFFFFFFFFFFFFFFFFFFFFFFFFFFFFFFFFFFFF  
@A00155:342:HHGFNDSXY:1:1635:8513:21590 2:N:0:GAACCTAG+TCCGCATA  
TCTGCATAGCGTTCACGTGTGTAGACCACACGTGAGTCTGTAATCCTGCTGTCTGCTTAAGAGCATCT  
GCCAGGTTAGTTATGTTTACCGTCCCCTCAGGGGTCAAGAATTGCTTTGAGAGTCCATCAAGTGATGA  
+  
FFFF:FFFFFFFFFFFFFFFFFFFFFFFFFFFFFFFFFFFFFFFFFFFFFFFFFFFFFFFFFFFFFFFFFFFFFF  
FFFFFFFFFFFFFFFFFFFFFFFFFFFFFFFFFFFFFFFFFFFFFFFFFFFFFFFFFFFFFFFFFFFFFFFFFFFFFF  
@A00155:342:HHGFNDSXY:1:1529:13268:18521 2:N:0:GAACCTAG+TCCGCATA  
TCTGCATAGCGTTCACGTGTGTAGACCACACGTGAGTCTGTAATCCTGCTGTCTGCTTAAGAGCATCT  
GCCAGGTTAGTTATGTTTACCGTCCCCTCAGGGGTCAAGAATTGCTTTGAGAGTCCATCAAGTGATGA  
+  
FFFFFFFFFFFFFFFFFFFF:FFFFFFFFFFFFFFFFFFFFFFFFFFFFFFFFFFFFFFFFFFFFFFFFFFFFFF  
FFFFFFFFFFFFFFFFFFFFFFFFFFFFFFFFFFFFFFFFFFFFFFFFFFFFFFFFFFFFFFFFFFFFFFFFFFFF  
@A00155:342:HHGFNDSXY:1:2456:11921:12273 1:N:0:GAACCTAG+TCCGCATA  
TGCATAGCGTTCACGTGTGTAGACCACACGTGAGTCTGTAATCCTGCTGTCTGCTTAAGAGCATCTGC  
CAGGTTAGTTATGTTTACCGTCCCCTCAGGGGTCAAGAATTGCTTTGAGAGTCCATCAAGTGAT  
+  
FFFFFFFFFFFF:FFFFFFFFFFFFFFFFFFFF,FFFFFFFFFFFFFFFFFFFFFFFFFFFFFFFFFFFFFFFFFFFF  
FFFF,FFFFFFFFFFFFFFFFFFFFFFFFFFFFFFFFFFFFFFFFFFFFFFFFFFFFFFFFFFFFFFFFFFFFFF  
@A00155:342:HHGFNDSXY:1:1428:1371:12571 1:N:0:GAACCTAG+TCCGCATA  
GCATAGCGTTCACGTGTGTAGACCACACGTGAGTCTGTAATCCTGCTGTCTGCTTAAGAGCATCTGCC  
AGGTTAGTTATGTTTACCGTCCCCTCAGGGGTCAAGAATTGCTTTGAGAGTCCATCAAGTGATGACGA  
+  
FFF:F:FFF:F:FFFFFFFF:FFFF:FFFFFFFFFFFFFFFFFFFFFFFFFFFFFFFFFFFFFFFFFFFF:FFFFF,FFFF  
:FFF,:F,:FFF,FF:FFFFFFFFFFFFFFFFFFFFFFFF:F:FFFFFFFFFFFFFFFFFFFFFFFF:FFFFF,FFF  
@A00155:342:HHGFNDSXY:1:2336:24867:28338 1:N:0:GAACCTAG+TCCGCATA  
GCATAGCGTTCACGTGTGTAGACCACACGTGAGTCTGTAATCCTGCTGTCTGCTTAAGAGCATCTGCC  
AGGTTAGTTATGTTTACCGTCCCCTCAGGGGTCAAGAATTGCTTTGAGAGTCCATCAAGTGATGACGA  
+  
FFFFFFFFFFFFFFFFFFFFFFFFFFFFFFFFFFFFFFFFFFFFFFFFFFFFFFFFFFFFFFFFFFFFFFFFFFFF  
FFFFF:FFFF,FFFFFFFFFFFFFFFFFFFFFFFFFFFFFFFFFFFFFFFFFFFFFFFFFFFFFFFFFFFFFF  
@A00155:342:HHGFNDSXY:1:1201:25880:5666 1:N:0:GAACCTAG+TCCGCATA  
GCATAGCGTTCACGTGTGTAGACCACACGTGAGTCTGTAATCCTGCTGTCTGCTTAAGAGCATCTGCC  
AGGTTAGTTATGTTTACCGTCCCCTCAGGGGTCAAGAATTGCTTTGAGAGTCCATCAAGTGATGACGA  
+  
FFFFFFFFFFFFFFFFFFFFFFFFFFFFFFFFFFFFFFFFFFFFFFFFFFFFFFFFFFFFFFFFFFFFFFFFFFFF  
FFFFFFFF:FFFFFFFFFFFFFFFFFFFFFFFFFFFFFFFFFFFFFFFFFFFFFFFFFFFFFFFFFFFFFFFF:FF:  
@A00155:342:HHGFNDSXY:1:1510:25391:19946 1:N:0:GAACCTAG+TCCGCATA  
GCATAGCGTTCACGTGTGTAGACCACACGTGAGTCTGTAATCCTGCTGTCTGCTTAAGAGCATCTGCC  
AGGTTAGTTATGTTTACCGTCCCCTCAGGGGTCAAGAATTGCTTTGAGAGTCCATCAAGTGATGACGA  
+  
FFFFFFFFFFFFFFFFFFFFFFFFFFFFFFFFFFFFFFFFFFFFFFFFFFFFFFFFFFFFFFFFFFFFFFFFFFFF  
:FF:FF:FFFFFFFF:FFFFFFFFFFFF:FFFFFFFF:FFFFFFFF:FFFFFFFF:FFFFFFFF:FF  
@A00155:342:HHGFNDSXY:1:2403:31882:24017 1:N:0:GAACCTAG+TCCGCATA  
CTTAGCGTTCACGTGTGTAGACCACACGTGAGTCTGTAATCCTGCTGTCTGCTTAAGAGCATCTGCCA  
GGTTAGTTATGTTTACCGTCCCCTCAGGGGTCAAGAATTGCTTTGAGAGTCCATCAAGTGATGACGAA  
+

[illegible]



FFFFFFFF:FFFFFFFF:FFFFFFFF:FFFFFFFF,FFFFFFFF:FF:FFFF::F  
FFF:FFFFFFFF:FFFFFFFFFFFFFFFF:FFFF,FFFFFFFF,FFFF,FFFF,FFFFFF  
@A00155:342:HHGFNDSXY:1:2511:6225:12618 1:N:0:GAACCTAG+TCCGCATA  
CGTTCACGTGTGTAGACCACACGTGAGTCTGTAATCCTGCTGTCTGCTTAAGAGCATCTGCCAGGTTA  
GTTATGTTTACCGTCCCCTCAGGGGTCAAGAATTGCTTTGAGAGTCCATCAAGTGATGACGAAC  
+  
FFFFFFFFFFFFFFFFFFFFFFFF:FFFFFFFFFFFFFFFFFFFFFFFFFFFFFFFF:FF  
FFFFFFFFFFFF:,FFFFFFFF:FFFFFF,FFFFFFFF:FFFFFF:FFFFFF:FFF  
@A00155:342:HHGFNDSXY:1:1622:19940:15139 1:N:0:GAACCTAG+TCCGCATA  
CGTTCACGTGTGTAGACCACACGTGAGTCTGTAATCCTGCTGTCTGCTTAAGAGCATCTGCCAGGTTA  
GTTATGTTTACCGTCCCCTCAGGGGTCAAGAATTGCTTTGAGAGTCCATCAAGTGATGACGAACCTCCC  
+  
FFFFFFFFFFFFFFFFFFFFFFFFFFFFFFFFFFFFFFFFFFFFFFFFFFFFFFFFFFFFFFFF,FF  
FFFF:FFFFFFFFFFFFFFFFFFFFFFFFFFFFFFFFFFFFFFFFFFFFFFFFFFFFFFFFFFFFF  
@A00155:342:HHGFNDSXY:1:1277:11858:15702 1:N:0:GAACCTAG+TCCGCATA  
CGTTCACGTGTGTAGACCACACGTGAGTCTGTAATCCTGCTGTCTGCTTAAGAGCATCTGCCAGGTTA  
GTTATGTTTACCGTCCCCTCAGGGGTCAAGAATTGCTTTGAGAGTCCATCAAGTGATGACGAACCTCCC  
+  
FFFFFFFFFFFFFFFFFFFFFFFFFFFFFFFFFFFFFFFFFFFFFFFFFFFFFFFFFFFFFFFF:FFFFFFFFFFFFFFFF  
FFFFFFFFFFFFFFFFFFFFFFFFFFFFFFFFFFFFFFFFFFFFFFFFFFFFFFFFFFFFFFFFFFFFFFFF  
@A00155:342:HHGFNDSXY:1:2352:13205:26835 1:N:0:GAACCTAG+TCCGCATA  
CGTTCACGTGTGTAGACCACACGTGAGTCTGTAATCCTGCTGTCTGCTTAAGAGCATCTGCCAGGTTA  
GTTATGTTTACCGTCCCCTCAGGGGTCAAGAATTGCTTTGAGAGTCCATCAAGTGATGACGAACCTCCC  
+  
FFFFFFFFFFFFFFFFFFFFFFFFFFFFFFFFFFFFFFFFFFFFFFFFFFFFFFFFFFFFFFFFFFFF  
F:FFFF,FFFFFFFFFFFFFFFFFFFFFFFFFFFFFFFFFFFFFFFFFFFFFFFFFFFFFFFFFFFFF  
@A00155:342:HHGFNDSXY:1:1568:19560:7279 1:N:0:GAACCTAG+TCCGCATA  
CGTTCACGTGTGTAGACCACACGTGAGTCTGTAATCCTGCTGTCTGCTTAAGAGCATCTGCCAGGTTA  
GTTATGTTTACCGTCCCCTCAGGGGTCAAGAATTGCTTTGAGAGTCCATCAAGTGATGACGAACCTCCC  
+  
FFFFFFFFFFFFFFFFFFFFFFFFFFFFFFFFFFFFFFFFFFFFFFFFFFFFFFFFFFFFFFFFFFFF  
FFFFFFFFFFFFFFFFFFFFFFFFFFFFFFFF:FFFFFFFFFFFFFFFFFFFFFFFF:FFFFFFFFFFFFFFFF  
@A00155:342:HHGFNDSXY:1:1124:15429:23390 1:N:0:GAACCTAG+TCCGCATA  
CGTTCACGTGTGTAGACCACACGTGAGTCTGTAATCCTGCTGTCTGCTTAAGAGCATCTGCCAGGTTA  
GTTATGTTTACCGTCCCCTCAGGGGTCAAGAATTGCTTTGAGAGTCCATCAAGTGATGACGAACCTCCC  
+  
FFFFFFFFFFFFFFFFFFFFFFFFFFFFFFFFFFFFFFFFFFFFFFFFFFFFFFFFFFFFFFFFFFFF  
FFFFFFFFFFFFFFFFFFFFFFFFFFFFFFFFFFFFFFFF:FFFFFFFFFFFFFFFFFFFFFFFFFFFFFFFF  
@A00155:342:HHGFNDSXY:1:2518:25762:5932 1:N:0:GAACCTAG+TCCGCATA  
CGTTCACGTGTGTAGACCACACGTGAGTCTGTAATCCTGCTGTCTGCTTAAGAGCATCTGCCAGGTTA  
GTTATGTTTACCGTCCCCTCAGGGGTCAAGAATTGCTTTGAGAGTCCATCAAGTGATGACGAACCTCCC  
+  
FFFFFFFFFFFFFFFFFFFFFFFFFFFFFFFFFFFFFFFFFFFFFFFFFFFFFFFFFFFFFFFFFFFF  
FFFFFFFFFFFFFFFFFFFFFFFFFFFFFFFFFFFFFFFF:FFFFFFFFFFFFFFFFFFFFFFFFFFFFFFFF  
@A00155:342:HHGFNDSXY:1:1527:17390:2112 1:N:0:GAACCTAG+TCCGCATA  
CGTTCACGTGTGTAGACCACACGTGAGTCTGTAATCCTGCTGTCTGCTTAAGAGCATCTGCCAGGTTA  
GTTATGTTTACCGTCCCCTCAGGGGTCAAGAATTGCTTTGAGAGTCCATCAAGTGATGACGAACCTCCC  
+  
FFFFFFFFFFFFFFFFFFFF:FFFFFFFFFFFFFFFFFFFFFFFFFFFFFFFF,FFFFFFFFFFFF  
FFF:FF:FFFF:FFFFFFFFFFFFFFFF:FFFFFFFFFFFFFFFF,FFFFFFFFFFFFFFFF  
@A00155:342:HHGFNDSXY:1:1554:13033:26475 1:N:0:GAACCTAG+TCCGCATA  
CGTTCACGTGTGTAGACCACACGTGAGTCTGTAATCCTGCTGTCTGCTTAAGAGCATCTGCCAGGTTA  
GTTATGTTTACCGTCCCCTCAGGGGTCAAGAATTGCTTTGAGAGTCCATCAAGTGATGACGAACCTCCC  
+

```
FF,FFFFFFFFFFFFFFFFFFFFFFFFFFFFFFFFFFFFFFFFFFFFFFFFFFFF:FFFFFFFFFFFFFFFF:FFFFFFFFFFFFF  
FF,FFFFFFFFFFFFFFFFFFFFFFFFFFFFFFFFFFFFFFFFFFFFFFFFFFFF:FFFFFFFFFFFFFFFF:FFFFFFFFFFFFF  
@A00155:342:HHGFNDSXY:1:2125:24578:4695 1:N:0:GAACCTAG+TCCGCATA  
CGTTCACGTGTGTAGACCACACGTGAGTCTGTAATCCTGCTGTCTGCTTAAGAGCATCTGCCAGGTТА  
GTTATGTTTACCGTCCCCTCAGGGGTCAAGAATTGCTTTGAGAGTCCATCAAGTGATGACGAACTCCC  
+  
FFFFFFFFFFFFFFFFFFFFFFFFFFFFFFFFFFFFFFFFFFFFFFFFFFFFFFFFFFFFFFFFFFFFFFFFFFFFFFFF  
FFFFFFFFFFFFFFFFFFFFFFFFFFFFFFFFFFFFFFFFFFFFFFFFFFFFFFFFFFFFFFFFFFFFFFFFFFFFFFFF  
@A00155:342:HHGFNDSXY:1:1349:4842:2300 1:N:0:GAACCTAG+TCCGCATA  
GTTACAGTGTGTAGACCACACGTGAGTCTGTAATCCTGCTGTCTGCTTAAGAGCATCTGCCAGGTТАG  
TTATGTTTACCGTCCCCTCAGGGGTCAAGAATTGCTTTGAGAGTCCATCAAGTGATGAC  
+  
F:FFFFFFFFFFFFFFFFFFFFFFFFFFFFFFFFFFFFFFFFFFFFFFFFFFFFFFFFFFFFFFFFFFFFFFFF  
:FFFFFFFFFFFFFFFFFFFFFFFFFFFFFFFFFFFFFFFFFFFFFFFFFFFFFFFFFFFFFFFFFFFFFFFF  
@A00155:342:HHGFNDSXY:1:2623:2302:23954 1:N:0:GAACCTAG+TCCGCATA  
GTTACAGTGTGTAGACCACACGTGAGTCTGTAATCCTGCTGTCTGCTTAAGAGCATCTGCCAGGTТАG  
TTATGTTTACCGTCCCCTCAGGGGTCAAGAATTGCTTTGAGAGTCCATCAAGTGATGAC  
+  
FFFFFFFFFFFFFFFFFFFFFFFFFFFFFFFFFFFFFFFFFFFFFFFFFFFF:FFFFFFFF:F,FFFFFFFFFFFFFFFF  
FFFFFFFFFFFFFFFFFFFFFFFFFFFFFFFFFFFFFFFFFFFFFFFFFFFF:FFFFF,FFFFFFFFFFFFFF  
@A00155:342:HHGFNDSXY:1:2217:15058:29857 1:N:0:GAACCTAG+TCCGCATA  
GTTACAGTGTGTAGACCACACGTGAGTCTGTAATCCTGCTGTCTGCTTAAGAGCATCTGCCAGGTТАG  
TTATGTTTACCGTCCCCTCAGGGGTCAAGAATTGCTTTGAGAGTCCATCAAGTGATGACGAACTCCC  
+  
:FFF:FFFFFFFF:FFFFFFFFFFFFFFFFFFFFFFFFFFFFFFFFFFFFFFFFFFFFFFFFFFFFFFFF:F  
FFFFFFFFFFFFFFFF,FFFF:FFFFFFFFFFFFFFFFFFFFFFFFFFFFFFFFFFFFFFFFFFFFFFFF:FFFFF:  
@A00155:342:HHGFNDSXY:1:1135:10963:5102 1:N:0:GAACCTAG+TCCGCATA  
GTTACAGTGTGTAGACCACACGTGAGTCTGTAATCCTGCTGTCTGCTTAAGAGCATCTGCCAGGTТАG  
TTATGTTTACCGTCCCCTCAGGGGTCAAGAATTGCTTTGAGAGTCCATCAAGTGATGACGAACTCCCT  
+  
FFFFFFFFFFFFFFFFFFFFFFFFFFFFFFFFFFFFFFFFFFFFFFFFFFFFFFFFFFFFFFFFFFFFFFFFFFFFFFFF:FF  
:FFFFFFFFFFFFFFFFFFFFFFFFFFFFFFFFFFFFFFFFFFFFFFFFFFFFFFFFFFFFFFFFFFFFFFFFFFFFFFFF  
@A00155:342:HHGFNDSXY:1:1413:5385:3208 1:N:0:GAACCTAG+TCCGCATA  
GTTACAGTGTGTAGACCACACGTGAGTCTGTAATCCTGCTGTCTGCTTAAGAGCATCTGCCAGGTТАG  
TTATGTTTACCGTCCCCTCAGGGGTCAAGAATTGCTTTGAGAGTCCATCAAGTGATGACGAACTCCCT  
+  
FFFFFFFFFFFFFFFFFFFF,F:FFFFFFFF:FFFFF:FFFFFFFFFFFFFFFF:FFFFFFFFFFFFFFFF:F  
F:FFFFFFFFFFFFFFFFFFFFFFFFFFFFFFFF,FFFFFFFF,FFFFFFFFFFFFFFFFFFFFFFFF:FFFFFFFF  
@A00155:342:HHGFNDSXY:1:2126:27001:36323 1:N:0:GAACCTAG+TCCGCATA  
TTCACGTGTGTAGACCACACGTGAGTCTGTAATCCTGCTGTCTGCTTAAGAGCATCTGCCAGGTТАGТ  
TATGTTTACCGTCCCCTCAGGGGTCAAGAATTGCTTTGAGAGTCCATCAAGTGATGACGAACTCC  
+  
FFFFFFFFFFFFF:FFFFFFFF,FFFFFFFFFFFFFFFFFFFFFFFFFFFFFFFFFFFFFFFFFFFFFFFF:FFFF,  
FF:FFF,F:FFFFFFFFFFFFFFFFFFFFFFFFFFFFFFFFFFFFFFFFFFFF:FFFFFFFF:FFFFF:,FFF,  
@A00155:342:HHGFNDSXY:1:1437:25572:22388 1:N:0:GAACCTAG+TCCGCATA  
TTCACGTGTGTAGACCACACGTGAGTCTGTAATCCTGCTGTCTGCTTAAGAGCATCTGCCAGGTТАGТ  
TATGTTTACCGTCCCCTCAGGGGTCAAGAATTGCTTTGAGAGTCCATCAAGTGATGACGAACTCCCT  
+  
FFFFFFFFFFFFF::FFFFFFFFFFFFFFFF,FFFFFFFFFFFFFFFFFFFFFFFFFFFFFFFFFFFFFFFF:FFFFF:  
FFFFFFFFFFFFFFFFFFFFFFFFFFFFFFFFFFFFFFFFFFFFFFFFFFFFFFFFFFFFFFFFFFFFFFFFFFFFFFFF  
@A00155:342:HHGFNDSXY:1:1446:16911:31031 2:N:0:GAACCTAG+TCCGCATA  
TTCACGTGTGTAGACCACACGTGAGTCTGTAATCCTGCTGTCTGCTTAAGAGCATCTGCCAGGTТАGТ  
TATGTTTACCGTCCCCTCAGGGGTCAAGAATTGCTTTGAGAGTCCATCAAGTGATGACGAACTCCCT
```

FFFFFFFFFFFFFFFFFFFFFFFFFFFFFFFFFFFFFFFFFFFFFFFFFFFFFFFFFFFFFFFFFFFFFFFFFFFFFFFF  
FFFFFFFFFFFFFFFFFFFFFFFFFFFFFFFFFFFFFFFFFFFFFFFFFFFFFFFFFFFFFFFFFFFFFFFFFFFFFFFF  
@A00155:342:HHGFNDSXY:1:2252:6912:1658 2:N:0:GAACCTAG+TCCGCATA  
TTCACGTGTGTAGACCACACGTGAGTCTGTAATCCTGCTGTCTGCTTAAGAGCATCTGCCAGGTTAGT  
TATGTTTACCGTCCCCTCAGGGGTCAAGAATTGCTTTGAGAGTCCATCAAGTGATGACGAACTCCCTT  
+  
FFFFFFFFFFFFFFFFFFFFFFFFFFFFFFFFFFFFFFFFFFFFFFFFFFFFFFFFFFFFFFFFFFFFFFFFFFFFFFFF  
FFFFFFFFFFFFFFFFFFFFFFFFFFFFFFFFFFFFFFFFFFFFFFFFFFFFFFFFFFFFFFFFFFFFFFFFFFFFFFFF  
@A00155:342:HHGFNDSXY:1:1526:10303:15389 1:N:0:GAACCTAG+TCCGCATA  
TTCACGTGTGTAGACCACACGTGAGTCTGTAATCCTGCTGTCTGCTTAAGAGCATCTGCCAGGTTAGT  
TATGTTTACCGTCCCCTCAGGGGTCAAGAATTGCTTTGAGAGTCCATCAAGTGATGACGAACTCCCTT  
+  
FFFFFFFFF:FFFFFFFF:FFFFFFFFFFFFFFFFFFFFFFFFFFFFFFFFFFFFFFFFFFFFFFFFFFFFFFFFF:  
FFFFFFFFFFFFFFFFFFFFFFFFFFFFFFFFFFFFFFFFFFFFFFFFFFFFFFFFFFFFFFFFFFFFFFFFFFFF:  
@A00155:342:HHGFNDSXY:1:1644:27787:14732 1:N:0:GAACCTAG+TCCGCATA  
TTCACGTGTGTAGACCACACGTGAGTCTGTAATCCTGCTGTCTGCTTAAGAGCATCTGCCAGGTTAGT  
TATGTTTACCGTCCCCTCAGGGGTCAAGAATTGCTTTGAGAGTCCATCAAGTGATGACGAACTCCCTT  
+  
FFFFFFFFFFFF:FFFFFFFFFFFFFFFFFFFFFFFFFFFFFFFFFFFFFFFFFFFFFFFFFFFFFFFFFFFFF:  
:FFFFFFFFFFFFFFFFFFFFFFFFFFFFFFFFFFFFFFFFFFFFFFFFFFFFFFFFFFFFFFFFFFFFFFFFFFFF:  
@A00155:342:HHGFNDSXY:1:1169:9525:33489 1:N:0:GAACCTAG+TCCGCATA  
TTCACGTGTGTAGACCACACGTGAGTCTGTAATCCTGCTGTCTGCTTAAGAGCATCTGCCAGGTTAGT  
TATGTTTACCGTCCCCTCAGGGGTCAAGAATTGCTTTGAGAGTCCATCAAGTGATGACGAACTCCCTT  
+  
FFFFFFFFFFFFFFFFFFFFFFFFFFFFFFFFFFFFFFFFFFFFFFFFFFFFFFFFFFFFFFFFFFFFFFFFFFFF:  
FF:F:FFFFFFFFFFFF:FFF,FFFFFFFFFFFFFFFFFFFFFFFFFFFFFFFFFFFFFFFFFFFFFFFFFFFF,  
@A00155:342:HHGFNDSXY:1:2209:3161:34491 1:N:0:GAACCTAG+TCCGCATA  
TTCACGTGTGTAGACCACACGTGAGTCTGTAATCCTGCTGTCTGCTTAAGAGCATCTGCCAGGTTAGT  
TACGTTTACCGTCCCCTCAGGGGTCAAGAATTGCTTTGAGAGTCCATCAAGTGATGACGAACTCCCTT  
+  
FFFFFFF:FFFFFFFFFFFFFFFFFFFFFFFFFFFFFFFFFFFFFFFFFFFFFFFFFFFFFFFFFFFFFFFFFFFF:  
FFFF,FFFFFFFFFFFFFFFFFFFFFFFFFFFFFFFFFFFFFFFFFFFFFFFFFFFFFFFFFFFFFFFFFFFF,FF,F  
@A00155:342:HHGFNDSXY:1:1312:17381:22983 1:N:0:GAACCTAG+TCCGCATA  
TCACGTGTGTAGACCACACGTGAGTCTGTAATCCTGCTGTCTGCTTAAGAGCATCTGCCAGGTTAGTT  
ATGTTTACCGTCCCCTCAGGGGTCAAGAATTGCTTTGAGAGTCCATCAAGTGATGACGAACTCCC  
+  
FFFFFFFFFFFFFFFFFFFFFFFFFFFFFFFFFFFFFFFFFFFFFFFFFFFFFFFFFFFFFFFFFFFFFFFFFFFF:  
FFFFFFFFFFFFFFFFFFFFFFFFFFFFFFFFFFFFFFFFFFFFFFFFFFFFFFFFFFFFFFFFFFFFFFFFFFFF  
@A00155:342:HHGFNDSXY:1:2351:27633:23202 1:N:0:GAACCTAG+TCCGCATA  
TCACGTGTGTAGACCACACGTGAGTCTGTAATCCTGCTGTCTGCTTAAGAGCATCTGCCAGGTTAGTT  
ATGTTTACCGTCCCCTCAGGGGTCAAGAATTGCTTTGAGAGTCCATCAAGTGATGACGAACTCCC  
+  
FFFFFFFFF:FFFF:FFFFFFFFF:FFFFFFFFFFFFFFFFFFFFFFFFFFFFFFFFFFFFFFFFFFFFFFFFFFFF  
F:FF:FFFFFFF:FFFFFFFFFFFFFFFFFFFFFFFFFFFFFFFFFFFFFFFFFFFFFFFFFFFFFFFFFFFFF:  
@A00155:342:HHGFNDSXY:1:2239:6370:21543 2:N:0:GAACCTAG+TCCGCATA  
TCACGTGTGTAGACCACACGTGAGTCTGTAATCCTGCTGTCTGCTTAAGAGCATCTGCCAGGTTAGTT  
ATGTTTACCGTCCCCTCAGGGGTCAAGAATTGCTTTGAGAGTCCATCAAGTGATGACGAACTCCCTTG  
+  
FFF:FFFFFFFFFFFFFFFFFFFFFFFFFFFFFFFFFFFFFFFFFFFFFFFFFFFFFFFFFFFFFFFFFFFFF:  
FFFFFFFFFFFFFFFFFFFFFFFFFFFFFFFFFFFFFFFFFFFFFFFFFFFFFFFFFFFFFFFFFFFFFFFFFFFF  
@A00155:342:HHGFNDSXY:1:2454:26639:20134 1:N:0:GAACCTAG+TCCGCATA  
TCACGTGTGTAGACCACACGTGAGTCTGTAATCCTGCTGTCTGATTAAGAGCATCTGCCAGGTTAGTT  
ATGTTTACCGTCCCCTCAGGGGTCAAGAATTGCTTTGAGAGTCCATCAAGTGATGACGAACTCCCTTG  
+

FFFFFFFFFFFFFFFFFFFFFFFFFFFFFFFFFFFFFFFFFFFFFFFFFFFFFFFFFFFFFFFF:FFF:F  
FFFFFFFFFFFFFFFFFFFFFFFFFFFFFFFFFFFFFFFFFFFFFFFFFFFFFFFFFFFFFFFF:FFFF  
@A00155:342:HHGFNDSXY:1:1355:18222:19460 2:N:0:GAACCTAG+TCCGCATA  
TCACGTGTGTAGACCACACGTGAGTCTGTAATCCTGCTGTCTGCTTAAGAGCATCTGCCAGGTTAGTT  
ATGTTTACCGTCCCCTCAGGGGTCAAGAATTGCTTTGAGAGTCCATCAAGTGATGACGAACTCCCTTG  
+  
FFFFFFFFFFFFFFFFFFFFFFF,FFFFFFFFFFFFFFFFFFFFFFFFFFFFFFFFFFFFFFFFFFFFF  
FFFFFFFFFFFFFFFFFFFFFFFFFFFFFFFFFFFFFFFFFFFFFFFFFFFFFFFFFFFFFFFFFFFFF  
@A00155:342:HHGFNDSXY:1:2504:2672:27633 1:N:0:GAACCTAG+TCCGCATA  
TCACGTGTGTAGACCACACGTGAGTCTGTAATCCTGCTGTCTGCTTAAGAGCATCTGCCAGGTTAGTT  
ATGTTTACCGTCCCCTCAGGGGTCAAGAATTGCTTTGAGAGTCCATCAAGTGATGACGAACTCCCTTG  
+  
FFFFF,FFFFFFFFFFFFFFFFFFFF:FFFFFFFFFFFFFFFFFFFFFFFFFFFFFFFFFFFFFFFFF  
F:FFFFFFFFFFFFFFFFFFFFFFFFFFFFFFFFFFFFFFFFFFFFFFFFFFFFFFFFFFFFFFFF:FF  
@A00155:342:HHGFNDSXY:1:2371:5122:3223 2:N:0:GAACCTAG+TCCGCATA  
TCACGTGTGTAGACCACACGTGAGTCTGTAATCCTGCTGTCTGCTTAAGAGCATCTGCCAGGTTAGTT  
ATGTTTACCGTCCCCTCAGGGGTCAAGAATTGCTTTGAGAGTCCATCAAGTGATGACGAACTCCCTTG  
+  
FFF:FFFFFFFFFFFFFFFFFFFFFFFFFFFF:FFFFFFFF:FFFFF:FF:FFFFF:FFFFF:FFFF:FFF  
FFFFFFFFFFFFFFFFFFFFFFFFFFFF:FFFFFFFFFFFFFFFFFFFFFFFFFFFFFFFFFFFFFFFFFFFFF  
@A00155:342:HHGFNDSXY:1:1154:19660:12618 2:N:0:GAACCTAG+TCCGCATA  
CACGTGTGTAGACCACACGTGAGTCTGTAATCCTGCTGTCTGCTTAAGAGCATCTGCCAGGTTAGTTA  
TGTTTACCGTCCCCTCAGGGGTCAAGAATTGCTTTGAGAGTCCATCAAGTGATGACGAACTCCCTTGA  
+  
:FF:FFFFFFFFF,FFFFFFFFFFFFFFFFFFFFFFFFFFFFFFFFFFFFFFFFFFFFFFFFFFFFF  
FFF:FFFFFFFFFFFFFFFFFFFF:F:FFFFFFFFFFFFFFFFFFFFFFFFFFFFFFFFFFFFFFFFFFFFF  
@A00155:342:HHGFNDSXY:1:1154:20157:12665 2:N:0:GAACCTAG+TCCGCATA  
CACGTGTGTAGACCACACGTGAGTCTGTAATCCTGCTGTCTGCTTAAGAGCATCTGCCAGGTTAGTTA  
TGTTTACCGTCCCCTCAGGGGTCAAGAATTGCTTTGAGAGTCCATCAAGTGATGACGAACTCCCTTGA  
+  
:FFFFFFFFFFFFFFFFFFFF:FFFF:FFFFFFFFFFFFFFFFFFFF,FFFFFFFFFFFFFFFFFFFFF:  
FF:FFFF:FFFF:FFFFFFFF:F:FFFFFF,F,FFFFFFFFFFFFFFFFF,:FFFFFFFFFFFFFFFFFFFF  
@A00155:342:HHGFNDSXY:1:2662:23619:36918 1:N:0:GAACCTAG+TCCGCATA  
CACGTGTGTAGACCACACGTGAGTCTGTAATCCTGCTGTCTGCTTAAGAGCATCTGCCAGGTTAGTTA  
TGTTTACCGTCCCCTCAGGGGTCAAGAATTGCTTTGAGAGTCCATCAAGTGATGACGAACTCCCTTGA  
+  
FFFFFFFFFFFFFFFFFFFFFFFFFFFF:FFFFFFFFFFFFFFFFFFFFFFFFFFFFFFFFFFFFF,FFFFF  
:FFFFFFFFFFFFFFFFFFFFFFFFFFFFFFFFFFFFFFFFFFFFFFFFFFFFFFFFFFFFFFFFFFFFF  
@A00155:342:HHGFNDSXY:1:2412:4047:30232 2:N:0:GAACCTAG+TCCGCATA  
CACGTGTGTAGACCACACGTGAGTCTGTAATCCTGCTGTCTGCTTAAGAGCATCTGCCAGGTTAGTTA  
TGTTTACCGTCCCCTCAGGGGTCAAGAATTGCTTTGAGAGTCCATCAAGTGATGACGAACTCCCTTGA  
+  
FFFFFFFFFFFFFFFFFFFFFFFFFFFFFFFFFFFFFFFFFFFFFFFFFFFFFFFFFFFFFFFFFFFFF  
FFFFFFFFFFFFFFFFFFFF:FFFFFFFFFFFFFFFFFFFFFFFFFFFF:FFFFFFFFFFFFFFFFFFFFF:FF  
@A00155:342:HHGFNDSXY:1:2412:4246:30295 2:N:0:GAACCTAG+TCCGCATA  
CACGTGTGTAGACCACACGTGAGTCTGTAATCCTGCTGTCTGCTTAAGAGCATCTGCCAGGTTAGTTA  
TGTTTACCGTCCCCTCAGGGGTCAAGAATTGCTTTGAGAGTCCATCAAGTGATGACGAACTCCCTTGA  
+  
FFFFFFF:FFFFFFFFFFFFFFFFFFFF:FFFFFF:FFFFFFFFFFFFFFFFFFFFFFFFFFFFFFFFFFFFF  
FFFFFFFFFFFFFFFFFFFFFFFFFFFF:FFFFFFFFFFFFFFFFFFFF:FFFFFFFFFFFFFFFFFFFFF  
@A00155:342:HHGFNDSXY:1:2430:26178:30577 2:N:0:GAACCTAG+TCCGCATA  
CACGTGTGTAGACCACACGTGAGTCTGTAATCCTGCTGTCTGCTTAAGAGCATCTGCCAGGTTAGTTA  
TGTTTACCGTCCCCTCAGGGGTCAAGAATTGCTTTGAGAGTCCATCAAGTGATGACGAACTCCCTTGA  
+

FFFFFFFFFFFFFFFFFFFFFFFFFFFFFFFFFFFFFFFFFFFFFFFFFFFFFFFFFFFFFFFFFFFFFFFFFFFFFFFF  
FFFFFFFFFFFFFFFFFFFFFFFFFFFFFFFFFFFFFFFFFFFFFFFFFFFFFFFFFFFFFFFFFFFFFFFFFFFFFFFF,FFF  
@A00155:342:HHGFNDSXY:1:1510:25391:19946 2:N:0:GAACCTAG+TCCGCATA  
CACGTGTGTAGACCACACGTGAGTCTGTAATCCTGCTGTCTGCTTAAGAGCATCTGCCAGGTTAGTTA  
TGTTTACCGTCCCCTCAGGGGTCAAGAATTGCTTTGAGAGTCCATCAAGTGATGACGAACTCCCTTGA  
+  
FFFFFFFFFFFFFFFFFFFFFFFFFFFFFFFFFFFFFFFFFFFFFFFFFFFFFFFFFFFFFFFFFFFFFFFFFFFFFFFF  
FFFF:FFFFFFFFFFFF:FF:FFF:FFFFFFFFFFFFFFFFFFFFFFFFFFFFFFFFFFFFFFFFFFFFFFFFFFFFF:  
@A00155:342:HHGFNDSXY:1:1144:24297:36746 1:N:0:GAACCTAG+TCCGCATA  
CACGTGTGTAGACCACACGTGAGTCTGTAATCCTGCTGTCTGCTTAAGAGCATCTGCCAGGTTAGTTA  
TGTTTACCGTCCCCTCAGGGGTCAAGAATTGCTTTGAGAGTCCATCAAGTGATGACGAACTCCCTTGA  
+  
FFFFFFFFFFFFFFFFFFFFFFFFFFFFFFFFFFFFFFFFFFFFFFFFFFFFFFFFFFFFFFFFFFFFFFFFFFFFFFFF,FF  
FFFFFFFFFFFFFFFFFFFFFFFFFFFFFFFFFFFFFFFFFFFFFFFFFFFFFFFFFFFFFFFFFFFFFFFFFFFFFFFF  
@A00155:342:HHGFNDSXY:1:2662:23619:36918 2:N:0:GAACCTAG+TCCGCATA  
CACGTGTGTAGACCACACGTGAGTCTGTAATCCTGCTGTCTGCTTAAGAGCATCTGCCAGGTTAGTTA  
TGTTTACCGTCCCCTCAGGGGTCAAGAATTGCTTTGAGAGTCCATCAAGTGATGACGAACTCCCTTGA  
+  
FFFFFFFFFFFFFFFFFFFFFFFFFFFFFFFFFFFFFFFFFFFFFFFFFFFFFFFFFFFFFFFFFFFFFFFFFFFFFFFF  
FFFF,FF:FFFFFFFFFFFFFFFFFFFFFFFFFFFFFFFFFFFFFFFFFFFFFFFFFFFFFFFFFFFFFFFFFFFFFFFF  
@A00155:342:HHGFNDSXY:1:1423:21350:18677 1:N:0:GAACCTAG+TCCGCATA  
CACGTGTGTAGACCACACGTGAGTCTGTAATCCTGCTGTCTGCTTAAGAGCATCTGCCAGGTTAGTTA  
TGTTTACCGTCCCCTCAGGGGTCAAGAATTGCTTTGAGAGTCCATCAAGTGATGACGAACTCCCTTGA  
+  
FFFFFFFFFFFFFFFFFFFFFFFFFFFFFFFFFFFFFFFFFFFFFFFFFFFFFFFFFFFFFFFFFFFFFFFFFFFFFFFF:FFFFF  
FFFFFFFFFFFFFFFFFFFFFFFFFFFFFFFFFFFFFFFFFFFFFFFFFFFFFFFFFFFFFFFFFFFFFFFFFFFFFFFF  
@A00155:342:HHGFNDSXY:1:1361:17662:12665 2:N:0:GAACCTAG+TCCGCATA  
CACGTGTGTAGACCACACGTGAGTCTGTAATCCTGCTGTCTGCTTAAGAGCATCTGCCAGGTTAGTTA  
TGTTTACCGTCCCCTCAGGGGTCAAGAATTGCTTTGAGAGTCCATCAAGTGATGACGAACTCCCTTGA  
+  
FFFFFFFFFFFFFFFFFFFFFFFFFFFFFFFFFFFFFFFFFFFFFFFFFFFFFFFFFFFFFFFFFFFFFFFFFFFFFFFF  
FFFFFFFFFFFFFFFFFFFFFFFFFFFFFFFFFFFFFFFFFFFFFFFFFFFFFFFFFFFFFFFFFFFFFFFFFFFFFFFF  
@A00155:342:HHGFNDSXY:1:2240:5321:4194 2:N:0:GAACCTAG+TCCGCATA  
CACGTGTGTAGACCACACGTGAGTCTGTAATCCTGCTGTCTGCTTAAGAGCATCTGCCAGGTTAGTTA  
TGTTTACCGTCCCCTCAGGGGTCAAGAATTGCTTTGAGAGTCCATCAAGTGATGACGAACTCCCTTGA  
+  
F:FFFFFFFFFFFF:FFFFFFFFFFFF:FFFFFFFFFFFFFFFFFFFFFFFFFFFFFFFFFFFFFFFFFFFFFFFFFFFF  
FFFFFFFF,FFFFFFFFFFFFFFFFFFFFFFFFFFFFFFFFFFFFFFFFFFFFFFFFFFFFFFFFFFFFFFFFFFFFFFFF  
@A00155:342:HHGFNDSXY:1:2278:13431:32988 2:N:0:GAACCTAG+TCCGCATA  
CACGTGTGTAGACCACACGTGAGTCTGTAATCCTGCTGTCTGCTTAAGAGCATCTGCCAGGTTAGTTA  
TGTTTACCGTCCCCTCAGGGGTCAAGAATTGCTTTGAGAGTCCATCAAGTGATGACGAACTCCCTTGA  
+  
FFFFFFFFFFFFFFFFFFFFFFFFFFFFFFFFFFFFFFFFFFFFFFFFFFFFFFFFFFFFFFFFFFFFFFFFFFFFFFFF  
FFFFF:FFFFFFFFFFFFFFFFFFFFFFFFFFFFFFFFFFFFFFFFFFFFFFFFFFFFFFFFFFFFFFFFFFFFFFFF,FFF  
@A00155:342:HHGFNDSXY:1:1122:27597:4413 1:N:0:GAACCTAG+TCCGCATA  
ACGTGTGTAGACCACACGTGAGTCTGTAATCCTGCTGTCTGCTTAAGAGCATCTGCCAGGTTAGTTAT  
GTTTACCGTCCCCTCAGGGGTCAAGAATTGCTTTGAGAGTCCATCAAGTGATGACGAACTCCC  
+  
FFFFFFFFFFFFFFFFFFFFFFFFFFFFFFFFFFFFFFFFFFFFFFFFFFFFFFFFFFFFFFFFFFFFFFFFFFFFFFFF:FFF,F:F  
FFFFFFFFFFFFFFFFFFFFFFFFFFFFFFFFFFFFFFFFFFFFFFFFFFFFFFFFFFFFFFFFFFFFFFFFFFFFFFFF  
@A00155:342:HHGFNDSXY:1:2448:30680:21057 1:N:0:GAACCTAG+TCCGCATA  
ACGTGTGTAGACCACACGTGAGTCTGTAATCCTGCTGTCTGCTTAAGAGCATCTGCCAGGTTAGTTAT  
GTTTACCGTCCCCTCAGGGGTCAAGAATTGCTTTGAGAGTCCATCAAGTGATGACGAACTCCCTTGAA  
+

FFFFFFFFFFFFFFFFFFFFFFFFFFFFFFFFFFFFFFFFFFFFFFFFFFFFFFFFFFFFFFFFFFFFFFFFFFFFF,FFF  
FFFFFFFFFFFFFFFFFFFFFFFFFFFFFFFFFFFFFFFFFFFFFFFFFFFFFFFFFFFFFFFFFFFFFFFFFFFFF:FFFFFFFFFFFFFFF  
@A00155:342:HHGFNDSXY:1:2106:26169:21386 1:N:0:GAACCTAG+TCCGCATA  
ACGTGTGTAGACCACACGTGAGTCTGTAATCCTGCTGTCTGCTTAAGAGCATCTGCCAGGTTAGTTAT  
GTTTACCGTCCCCTCAGGGGTCAAGAATTGCTTTGAGAGTCCATCAAGTGATGACGAACTCCCTTGAA  
+  
FFFFFFFFFFFFFFFFFFFFFFFFFFFFFFFFFFFFFFFFFFFFFFFFFFFFFFFFFFFFFFFFFFFFFFFFFFFFF:FF:FFFFFFF  
FF:FFFFFFFFFFFFFFFFFFFFFFFFFFFFFFFFFFFFFFFFFFFFFFFFFFFFFFFFFFFFFFFFFFFFFFFFFFFFF:FFF  
@A00155:342:HHGFNDSXY:1:1446:16911:31031 1:N:0:GAACCTAG+TCCGCATA  
ACGTGTGTAGACCACACGTGAGTCTGTAATCCTGCTGTCTGCTTAAGAGCATCTGCCAGGTTAGTTAT  
GTTTACCGTCCCCTCAGGGGTCAAGAATTGCTTTGAGAGTCCATCAAGTGATGACGAACTCCCTTGAA  
+  
FFFFFFFFFFFFFFFFFFFFFFFFFFFFFFFFFFFFFFFFFFFFFFFFFFFFFFFFFFFFFFFFFFFFFFFFFFFFF:FFFFFFFFFFFF:FF,FF:  
FFFFFFFFFFFFFFFFFFFFFFFFFFFFFFFFFFFFFFFFFFFFFFFFFFFFFFFFFFFFFFFFFFFFFFFFFFFFF:FFFF  
@A00155:342:HHGFNDSXY:1:1154:31991:22388 1:N:0:GAACCTAG+TCCGCATA  
ACGTGTGTAGACCACACGTGAGTCTGTAATCCTGCTGTCTGCTTAAGAGCATCTGCCAGGTTAGTTAT  
GTTTACCGTCCCCTCAGGGGTCAAGAATTGCTTTGAGAGTCCATCAAGTGATGACGAACTCCCTTGAA  
+  
FFFFF,FFFFFFFF:F,F,F,F,F,F,F,F,F,F,F,F,F,F,F,F,F,F,F,F,F,F,F,F,F,F,F,F,F,F,  
FFFFFFFFFFFFFFFF:F,F,F,F,F,F,F,F,F,F,F,F,F,F,F,F,F,F,F,F,F,F,F,F,F,F,F,F,F,F,  
@A00155:342:HHGFNDSXY:1:1449:6759:20306 1:N:0:GAACCTAG+TCCGCATA  
ACGTGTGTAGACCACACGTGAGTCTGTAATCCTGCTGTCTGCTTAAGAGCATCTGCCAGGTTAGTTAT  
GTTTACCGTCCCCTCAGGGGTCAAGAATTGCTTTGAGAGTCCATCAAGTGATGACGAACTCCCTTGAA  
+  
FFFFFFFFFFFFFFFFFFFFFFFFFFFFFFFFFFFFFFFFFFFFFFFFFFFFFFFFFFFFFFFFFFFFFFFFFFFFF:F,F,FFF  
FFFFFFFFFFFFFFFFFFFFFFFFFFFFFFFFFFFFFFFFFFFFFFFFFFFFFFFFFFFFFFFFFFFFFFFFFFFFF:  
@A00155:342:HHGFNDSXY:1:1361:17662:12665 1:N:0:GAACCTAG+TCCGCATA  
ACGTGTGTAGACCACACGTGAGTCTGTAATCCTGCTGTCTGCTTAAGAGCATCTGCCAGGTTAGTTAT  
GTTTACCGTCCCCTCAGGGGTCAAGAATTGCTTTGAGAGTCCATCAAGTGATGACGAACTCCCTTGAA  
+  
FFFFFFFFFFFFFFFFFFFFFFFFFFFFFFFFFFFFFFFFFFFFFFFFFFFFFFFFFFFFFFFFFFFFFFFFFFFFF,FFFFFFFF  
FFF,FFFFFFFFFFFFFFFFFFFFFFFFFFFFFFFFFFFFFFFFFFFFFFFFFFFFFFFFFFFFFFFFFFFFFFFFFFFFF:FFFFFFFF  
@A00155:342:HHGFNDSXY:1:2213:10800:8328 1:N:0:GAACCTAG+TCCGCATA  
ACGTGTGTAGACCACACGTGAGTCTGTAATCCTGCTGTCTGCTTAAGAGCATCTGCCAGGTTAGTTAT  
GTTTACCGTCCCCTCAGGGGTCAAGAATTGCTTTGAGAGTCCATCAAGTGATGACGAACTCCCTTGAA  
+  
FFFFFFFFFFFFFFFFFFFFFFFFFFFFFFFFFFFFFFFFFFFFFFFFFFFFFFFFFFFFFFFFFFFFFFFFFFFFF:  
FFFFFFFFFFFFFFFFFFFFFFFFFFFFFFFFFFFFFFFFFFFFFFFFFFFFFFFFFFFFFFFFFFFFFFFFFFFFF:FFFFFFFFFFFF:  
@A00155:342:HHGFNDSXY:1:1158:21992:9737 1:N:0:GAACCTAG+TCCGCATA  
ACGTGTGTAGACCACACGTGAGTCTGTAATCCTGCTGTCTGCTTAAGAGCATCTGCCAGGTTAGTTAT  
GTTTACCGTCCCCTCAGGGGTCAAGAATTGCTTTGAGAGTCCATCAAGTGATGACGAACTCCCTTGAA  
+  
FFFFFFFFFFFFFFFFFFFFFFFFFFFFFFFFFFFFFFFFFFFFFFFFFFFFFFFFFFFFFFFFFFFFFFFFFFFFF:FFF  
FFFFFFFFFFFFFFFFFFFFFFFFFFFFFFFFFFFFFFFFFFFFFFFFFFFFFFFFFFFFFFFFFFFFFFFFFFFFF:  
@A00155:342:HHGFNDSXY:1:1529:18954:34256 1:N:0:GAACCTAG+TCCGCATA  
ACGTGTGTAGACCACACGTGAGTCTGTAATCCTGCTGTCTGCTTAAGAGCATCTGCCAGGTTAGTTAT  
GTTTACCGTCCCCTCAGGGGTCAAGAATTGCTTTGAGAGTCCATCAAGTGATGACGAACTCCCTTGAA  
+  
FFFFFFFFFFFFFFFFFFFFFFFFFFFFFFFFFFFFFFFFFFFFFFFFFFFFFFFFFFFFFFFFFFFFFFFFFFFFF,FFFFF  
FFFFFFFFFFFFFFFFFFFFFFFFFFFFFFFFFFFFFFFFFFFFFFFFFFFFFFFFFFFFFFFFFFFFFFFFFFFFF:  
@A00155:342:HHGFNDSXY:1:1158:21486:8077 1:N:0:GAACCTAG+TCCGCATA  
ACGTGTGTAGACCACACGTGAGTCTGTAATCCTGCTGTCTGCTTAAGAGCATCTGCCAGGTTAGTTAT  
GTTTACCGTCCCCTCAGGGGTCAAGAATTGCTTTGAGAGTCCATCAAGTGATGACGAACTCCCTTGAA  
+

[illegible]

FFFFFFFFFFFF:FFFFFFFFFFFFFFFFFFFFFFFFFFFFFFFFFFFFFFFFFFFFFFFFFFFFFFFFFFFFFFFFFFFF  
F:FFFFFFFFFFFFFFFFFFFFFFFFFFFFFFFFFFFFFFFFFFFFFFFFFFFFFFFFFFFFFFFFFFFF:FFFFF:FFFFFFF  
@A00155:342:HHGFNDSXY:1:1140:18105:30530 2:N:0:GAACCTAG+TCCGCATA  
TGTGTAGACCACACGTGAGTCTGTAATCCTGCTGTCTGCTTAAGAGCATCTGCCAGGTTAGTTATGTT  
TACCGTCCCCTCAGGGGTCAAGAATTGCTTTGAGAGTCCATCAAGTGATGACGAACTCCCTTGAAGCG  
+  
FFFFFFFFFFFFF,FFFFFFFFFFFFFFFFFFFF:FFFFFFFFFFFFFFFFFFFFFFFFFFFF:FFFFFFFFFFFFF  
FFFFFFFFFFFFFFFFFFFFF:FFFFFFFFFFFFFFFFFFFFFFFFFFFF:FFFFFFFFFFFFFFFFFFFFF:FFF  
@A00155:342:HHGFNDSXY:1:1444:11812:6073 2:N:0:GAACCTAG+TCCGCATA  
TGTGTAGACCACACGTGAGTCTGTAATCCTGCTGTCTGCTTAAGAGCATCTGCCAGGTTAGTTATGTT  
TACCGTCCCCTCAGGGGTCAAGAATTGCTTTGAGAGTCCATCAAGTGATGACGAACTCCCTTGAAGCG  
+  
FF:FFFFFFFFFFFFFFFFFFFFFFFFFFFFFFFFFFFFFFFFFFFFFFFFFFFFFFFFFFFFFFFFFFFF:F  
FFFFFFFFFFFFFFFFFFFFF:FFFFFFFFFFFFFFFFFFFFFFFFFFFFF:FFFFFFFFFFFFFFFFFFFFF:FFFFF  
@A00155:342:HHGFNDSXY:1:1509:20835:21355 2:N:0:GAACCTAG+TCCGCATA  
TGTGTAGACCACACGTGAGTCTGTAATCCTGCTGTCTGCTTAAGAGCATCTGCCAGGTTAGTTATGTT  
TACCGTCCCCTCAGGGGTCAAGAATTGCTTTGAGAGTCCATCAAGTGATGACGAACTCCCTTGAAGCG  
+  
FFFFFFFFFFFFFFFFFFFF:FFFFFFFFFFFFFFFFFFFFFFFFFFFFFFFFFFFFFFFFFFFFFFFFFFFFFFFFFFFF  
FFFFFFFFFFFFFFFFFFFFF:FFFFFFFFFFFFFFFFFFFFFFFFFFFFF:FFFFFFFFFFFFFFFFFFFFF:FFF  
@A00155:342:HHGFNDSXY:1:2252:6912:1658 1:N:0:GAACCTAG+TCCGCATA  
TGTGTAGACCACACGTGAGTCTGTAATCCTGCTGTCTGCTTAAGAGCATCTGCCAGGTTAGTTATGTT  
TACCGTCCCCTCAGGGGTCAAGAATTGCTTTGAGAGTCCATCAAGTGATGACGAACTCCCTTGAAGCG  
+  
FFFFFFFFFFFFFFFFFFFFFFFFFFFFFFFFFFFFFFFFFFFFFFFFFFFFFFFFFFFFFFFFFFFF: :FFFFF  
FFFFFFF:FFFFFFFFFFFFFFFFFFFFFFFFFFFFF:FFFFFFFFFFFF,FFFFF:FFFFFF,FFFFF  
@A00155:342:HHGFNDSXY:1:1219:22408:31876 2:N:0:GAACCTAG+TCCGCATA  
GTGTAGACCACACGTGAGTCTGTAATCCTGCTGTCTGCTTAAGAGCATCTGCCAGGTTAGTTATGTTT  
ACCGTCCCCTCAGGGGTCAAGAATTGCTTTGAGAGTCCATCAAGTGATGACGAACTCCCTTGAAGCGA  
+  
FFFFFFFFFFFFFFFFFFFFFFFFFFFFFFFFFFFF:FF,FFFFFFFFFFFFFFFFFFFF,FFFFFFFFFFFFFFFFFFFF  
FFFFFFFFFFFFFFFFFFFF:FFFFFFFFFFFFFFFFFFFFFFFFFFFFF:FFFFFFFFFFFFFFFFFFFFF:F  
@A00155:342:HHGFNDSXY:1:2559:5113:31203 2:N:0:GAACCTAG+TCCGCATA  
GTGTAGACCACACGTGAGTCTGTAATCCTGCTGTCTGCTTAAGAGCATCTGCCAGGTTAGTTATGTTT  
ACCGTCCCCTCAGGGGTCAAGAATTGCTTTGAGAGTCCATCAAGTGATGACGAACTCCCTTGAAGCGA  
+  
FFFFFFFFFFFFFFF:FF:FFFFFFFFFFFFFFFFFFFFFFFFFFFFF:FFFFF:FFFFFFFFFFFFFFFFFFFF  
FFFFFFFFFFFFFFFFFFFFF: :FFFFFF:FFFFFFFFFFFFFFFFFFFFFFFFFFFFF:FFFFFFFFFFFF  
@A00155:342:HHGFNDSXY:1:2240:5321:4194 1:N:0:GAACCTAG+TCCGCATA  
GTGTAGACCACACGTGAGTCTGTAATCCTGCTGTCTGCTTAAGAGCATCTGCCAGGTTAGTTATGTTT  
ACCGTCCCCTCAGGGGTCAAGAATTGCTTTGAGAGTCCATCAAGTGATGACGAACTCCCTTGAAGCGA  
+  
FFFFFFFFFFFFFFFFFFFFFFFFFFFFFFFFFFFFFFFFFFFFFFFFFFFFFFFFFFFFFFFFFFFFFFFFFFF  
FFFFFFFFFFFFFFFFFFFFF:FFFFFFFFFFFFFFFFFFFFFFFFFFFFF:FFFFFFFFFFFFFFFFFFFFF  
@A00155:342:HHGFNDSXY:1:2503:7120:9878 2:N:0:GAACCTAG+TCCGCATA  
GTGTAGACCACACGTGAGTCTGTAATCCTGCTGTCTGCTTAAGAGCATCTGCCAGGTTAGTTATGTTT  
ACCGTCCCCTCAGGGTTCAAGAATTGCTTTGAGAGTCCATCAAGTGATGACGAACTCCCTTGAAGCGA  
+  
F:FFFFFFF:F,FFFFFFFF:F,F,F:FFFFFF:FFFFFFFF,FFFFFFFF:FFF,FFF:F:FFF:FFFFFF  
FFF:FFF:FF: :FFF,FFFFFFFF:FFF:FFF:FF,FF,FFFFFFFF:FFFF:FFFFFFF  
@A00155:342:HHGFNDSXY:1:2503:32362:7748 2:N:0:GAACCTAG+TCCGCATA  
GTGTAGACCACACGTGAGTCTGGAATCCTGCTGTCTGCTTAAGAGCATCTGCCAGGTTAGTTATGTTT  
ACCGTCCCCTCAGGGGTCAAGAATTGCTTTGAGAGTCCATCAAGTGATGACGAACTCCCTTGAAGCGA  
+



FFFFFF,FFFFFFFFFFFFFFFF, :FFFFFFFFFFFFFFFF:FFFFFFFFFFFFFFFFFFFFFFFF:F::FFF,  
FFFFFFFFFFFF,FFFFFFFFFFFF,FFFFFFFFFFFFFFFFFFFFFFFF:FFFFFFFFFFFF:FFFFF,,FFFFFFF  
@A00155:342:HHGFNDSXY:1:1532:25852:23657 1:N:0:GAACCTAG+TCCGCATA  
GTGTAGACCACACGTGAGTCTGTAATCCTGCTGTCTGCTTAAGAGCATCTGCCAGGTTAGTTATGTTT  
ACCGTCCCCTCAGGGGTCAAGAATTGCTTTGAGAGTCCATCAAGTGATGACGAACTCCCTTGAAGCGA  
+  
FFFFFFFFFF,FF:FFFFFFFFFFFFFFFFFFFFFFFFFFFF:FFFFFFFFFFFF: :FFFFFFFFFFFFFFFFFFFF,FFF,,  
FF,FFFFFFFFFF,FFFFFFFFFFFFFFFFFFFF:FFFFFFFFFFFF:FFFFFFFFFFFF:FFFFFFFFFFFFFFFF,FFFFFFFFFFFF  
@A00155:342:HHGFNDSXY:1:2154:26883:18928 1:N:0:GAACCTAG+TCCGCATA  
GTAGACCACACGTGAGTCTGTAATCCTGCTGTCTGCTTAAGAGCATCTGCCAGGTTAGTTATGTTTAC  
CGTCCCCTCAGGGGTCAAGAATTGCTTTGAGAGTCCATCAAGTGATGACGAACTCCCTTGAAG  
+  
FFFFFFFFFFFFFFFFFFFFFFFFFFFFFFFFFFFFFFFFFFFFFFFFFFFFFFFFFFFFFFFFFFFFFFFF:FFFFFFFFFFFFFFFF:FFF,FFFFFFFFFF  
FFFFFFFFFFFFFFFFFFFFFFFFFFFFFFFFFFFFFFFFFFFFFFFFFFFFFFFFFFFFFFFFFFFFFFFFFFFFFFFFFFFFFFFFFFFFFFFF  
@A00155:342:HHGFNDSXY:1:1650:30264:25316 1:N:0:GAACCTAG+TCCGCATA  
GTAGACCACACGTGAGTCTGTAATCCTGCTGTCTGCTTAAGAGCATCTGCCAGGTTAGTTATGTTTAC  
CGTCCCCTCAGGGGTCAAGAATTGCTTTGAGAGTCCATCAAGTGATGACGAACTCCCTTGAAGCGACG  
+  
FFFFFFF,FFFFFFFFF:FFFFFFFFFFFFFFFFFFFFFFFFFFFFFFFFFFFFFFFFFFFFFFFFFFFFFFFF,FFFFFFFFFFFFFFFFFFFFF  
FFFFFFFFF:FF:FFFF:FFFFF:FFFFFFFFFFFF:FFFFFFFFFFFF, :FFFFFFFFF:FFFFFFFFFFFF:FFF  
@A00155:342:HHGFNDSXY:1:2625:12246:3818 1:N:0:GAACCTAG+TCCGCATA  
GTAGACCACACGTGAGTCTGTAATCCTGCTGTCTGCTTAAGAGCATCTGCCAGGTTAGTTATGTTTAC  
CGTCCCCTCAGGGGTCAAGAATTGCTTTGAGAGTCCATCAAGTGATGACGAACTCCCTTGAAGCGACG  
+  
FFFFFFFFFFFFFFFFFFFFFFFFFFFFFFFFFFFFFFFFFFFFFFFFFFFFFFFFFFFFFFFFFFFFFFFF: :FFF:FFFFFFFFF  
FFFFFFFFFFFFFFFFFFFFFFFFFFFFFFFFFFFFFFFFFFFFFFFFFFFFFFFFFFFFFFFFFFFFFFFFFFFFFFFFFFFFFFFFFFFFFFFF  
@A00155:342:HHGFNDSXY:1:2206:15383:23813 1:N:0:GAACCTAG+TCCGCATA  
GACCACACGTGAGTCTGTAATCCTGCTGTCTGCTTAAGAGCATCTGCCAGGTTAGTTATGTTTACCGT  
CCCCTCAGGGGTCAAGAATTGCTTTGAGAGTCCATCAAGTGATGACGAACTCCCTTGAAGCGACGCCT  
+  
FFFFFFFFFFFFFFFFFFFFFFFFFFFFFFFFFFFFFFFFFFFFFFFFFFFFFFFFFFFFFFFFFFFFFFFFFFFFFFFFFFFFFFFFFFFFFFFF  
FFFFFFFFFFFFFFFFFFFFFFFFFFFFFFFFFFFFFFFFFFFFFFFFFFFFFFFFFFFFFFFFFFFFFFFFFFFFFFFFFFFFFFFFFFFFFFFF  
@A00155:342:HHGFNDSXY:1:2212:19976:19805 2:N:0:GAACCTAG+TCCGCATA  
GACCACACGTGAGTCTGTAATCCTGCTGTCTGCTTAAGAGCATCTGCCAGGTTAGTTATGTTTACCGT  
CCCCTCAGGGGTCAAGAATTGCTTTGAGAGTCCATCAAGTGATGACGAACTCCCTTGAAGCGACGCCT  
+  
FFFFFFFFFFFF,FFFFFFFFFFFFFFFFFFFFFFFFFFFF,FFFFFFFFFFFFFFFFFFFFFFFFFFFFFFFFFFFFFFFFFFFFFFFFFFFFF  
FFFFFFFFFFFFFFFFFFFFFFFFFFFF:FFFFFFFFFFFFFFFFFFFFFFFFFFFFFFFFFFFFFFFFFFFFFFFFFFFFFFFFFFFFFFFFFFFFF  
@A00155:342:HHGFNDSXY:1:1622:19940:15139 2:N:0:GAACCTAG+TCCGCATA  
CACACGTGAGTCTGTAATCCTGCTGTCTGCTTAAGAGCATCTGCCAGGTTAGTTATGTTTACCGTCCC  
CTCAGGGGTCAAGAATTGCTTTGAGAGTCCATCAAGTGATGACGAACTCCCTTGAAGCGACGCCTGAA  
+  
FFFFF:FFFFFFFFFFFFFFFFFFFFFFFFFFFFFFFFFFFFFFFFFFFFFFFFFFFFFFFFFFFFFFFF:FFFFFFFFFFFFFFFFFFFFF  
FFFFFFFFFFFF:FFFFFFFFFFFFFFFFFFFFFFFFFFFF:FFFFFFFFFFFF:FFFFFFFFFFFFFFFFFFFFFFFFFFFF:FFFFF  
@A00155:342:HHGFNDSXY:1:1554:13033:26475 2:N:0:GAACCTAG+TCCGCATA  
CACACGTGAGTCTGTAATCCTGCTGTCTGCTTAAGAGCATCTGCCAGGTTAGTTATGTTTACCGTCCC  
CTCAGGGGTCAAGAATTGCTTTGAGAGTCCATCAAGTGATGACGAACTCCCTTGAAGCGACGCCTGAA  
+  
FFF:FFFFFFFFFFFF:FFFFFFFFFFFFFFFFFFFFFFFFFFFFFFFFFFFFFFFFFFFFFFFFFFFFFFFFFFFFFFFFFFFFFFFFFFFFF  
FFFFFFFFFFFF:FFFFFFFFFFFFFFFFFFFFFFFFFFFFFFFFFFFFFFFFFFFFFFFFFFFFFFFFFFFFFFFF,FFFFFFFFFFFFFFFFFFFF  
@A00155:342:HHGFNDSXY:1:1678:23484:34053 2:N:0:GAACCTAG+TCCGCATA  
CACACGTGAGTCTGTAATCCTGCTGTCTGCTTAAGAGCATCTGCCAGGTTAGTTATGTTTACCGTCCC  
CTCAGGGGTCAAGAATTGCTTTGAGAGTCCATCAAGTGATGACGAACTCCCTTGAAGCGACGCCTGAA  
+

```

FFFFFFFFFFFFFFFFFFFFFFFFFFFFFFFFFFFFFFFFFFFFFFFFFFFFFFFFFFFFFFFFFFFFFFFFFFFFF:FFFFFFFFFF,FFF
FFFFFFFFFFFFFFF:FFFFFFFFFFFFFFFFFFFFFFFFFFFFFFFFFFFFFFFFFFFFFFFFFFFFFFFFFFFFFFFFFFFFFFFFFFFFF
@A00155:342:HHGFNDSXY:1:2356:12391:27868 2:N:0:GAACCTAG+TCCGCATA
CACGTGAGTCTGTAATCCTGCTGTCTGCTTAAGAGCATCTGCCAGGTTAGTTATGTTTTACCGTCCCCT
CAGGGGTCAAGAATTGCTTTGAGGGTCCATCAAGTGATGACGAACTCCCTTGAAGCGACGCCTGAAAT
+
FFFFFFFFFFFFFFFFFFFFFFFFFFFFFFFFFFFFFFFFFFFFFFFFFFFFFFFFFFFFFFFFFFFFFFFFFFFFF:FFFFFFFFFFFFFFFF
FFFFFFFFFFFFFFFFFFFFFFFFFFFFFFFFFFFFFFFFFFFFFFFFFFFFFFFFFFFFFFFFFFFFFFFFFFFFF:FFFFFFFFFFFFFFFF
@A00155:342:HHGFNDSXY:1:2622:20961:32315 1:N:0:GAACCTAG+TCCGCATA
CGTGAGTCTGTAATCCTGCTGTCTGCTTAAGAGCATCTGCCAGGTTAGTTATGTTTTACCGTCCCCTCA
GGGGTCAAGAATTGCTTTGAGAGTCCATCAAGTGATGACGAACTCCCTTGAAGCGACGCCTGAAATTT
+
FFFFFFFFFFFFFFFFFFFFFFFFFFFFFFFFFFFFFFFFFFFFFFFFFFFFFFFFFFFFFFFFFFFFFFFFFFFFF:FFFFFFFFFFFFFFFF
FFFFFFFFFFFFFFFFFFFFFFFFFFFFFFFFFFFFFFFFFFFFFFFFFFFFFFFFFFFFFFFFFFFFFFFFFFFFF:
@A00155:342:HHGFNDSXY:1:1201:25880:5666 2:N:0:GAACCTAG+TCCGCATA
GTGAGTCTGTAATCCTGCTGTCTGCTTAAGAGCATCTGCCAGGTTAGTTATGTTTTACCGTCCCCTCAG
GGGTCAAGAATTGCTTTGAGAGTCCATCAAGTGATGACGAACTCCCTTGAAGCGACGCCTGAAATTC
+
FFFFFFFFFFFFFFFFFFFFF:FFFFFFFFF,FFFFFFFFFFFFFFFFFFFFFFFFFFFFFFFFFFFFFFFFFFFFF:F
FFFFFFFFFFFFFFFFFFFFFFFFFFFFFFFFFFFFFFFFFFFFFFFFFFFFFFFFFFFFFFFFFFFFFFFFFFFFF:FF
@A00155:342:HHGFNDSXY:1:2118:3875:11992 2:N:0:GAACCTAG+TCCGCATA
GTGAGTCTGTAATCCTGCTGTCTGCTTAAGAGCATCTGCCAGGTTAGTTATGTTTTACCGTCCCCTCAG
GGGTCAAGAATTGCTTTGAGAGTCCATCAAGTGATGACGAACTCCCTTGAAGCGACGCCTGAAATTC
+
FFFFFFFFFFFFFFFFFFFFFFFFFFFFFFFFFFFFF:FFFFF:FFFFFFFF:FFFFFFFFFFFFFFFF,F:FFFFFFFFFFFFF
FFFFF,FFFFFFFFFFFFFFFFFFFF,FF:FFFFFFFFFFFFFFFFFFFF:F:FFFFFFFF:FFFFFFFFFFFF:FF
@A00155:342:HHGFNDSXY:1:2354:22887:11506 2:N:0:GAACCTAG+TCCGCATA
GTGAGTCTGTAATCCTGCTGTCTGCTTAAGAGCATCTGCCAGGTTAGTTATGTTTTACCGTCCCCTCAG
GGGTCAAGAATTGCTTTGAGAGTCCATCAAGTGATGACGAACTCCCTTGAAGCGACGCCTGAAATTC
+
F:FFFFFFFFFFFFFFFFFFFFF:FFFFFFFFFFFFFFFF:FFFFFFFFFFFFF:FFFFFFFFFFFFF:F:F:FF:FFFFF
FFFFF:FFFFFFFF:FFFFFFFFFF:FF:FFFFFFFFFFFFFFFFFFFF:FF,F:FFFFFFFF:FF:FFFFF:FFFFF
@A00155:342:HHGFNDSXY:1:2209:3125:34710 2:N:0:GAACCTAG+TCCGCATA
TGAGTCTGTAATCCTGCTGTCTGCTTAAGAGCATCTGCCAGGTTAGTTACGTTTACCGTCCCCTCAGG
GGTCAAGAATTGCTTTGAGAGTCCATCAAGTGATGACGAACTCCCTTGAAGCGACGCCTGAAATTTCC
+
::FFFFFFFFFFFFFFFFFFFFFFFFF:F:FFFFFFFFFFFFFFFFFFFFFFFFFFFFFFFFFFFFFFFFFFFFFFFF
FFFFFFFFFFFFFFFFFFFFFFFFFFFFFFFFFFFFFFFFFFFFFFFFFFFFFFFFFFFFFFFFFFFFF,FFFFFFFFFFFFFFFF
@A00155:342:HHGFNDSXY:1:2125:24578:4695 2:N:0:GAACCTAG+TCCGCATA
TGAGTCTGTAATCCTGCTGTCTGCTTAAGAGCATCTGCCAGGTTAGTTATGTTTTACCGTCCCCTCAGG
GGTCAAGAATTGCTTTGAGAGTCCATCAAGTGATGACGAACTCCCTTGAAGCGACGCCTGAAATTTCC
+
FFFFFFFFFFFFFFFFFFFFFFFFFFFFFFFFFFFFFFFFFFFFFFFFFFFFFFFFFFFFFFFFFFFFFFFFFFFFF:FFFFFFFFFFFFFFFF
FFFFFFFFFFFFF:FFFFFFFFFFFFFFFFFFFFFFFFFFFFFFFFFFFFFFFFFFFFFFFFFFFFFFFFFFFFFFFFFFFFF
@A00155:342:HHGFNDSXY:1:2209:3423:31688 2:N:0:GAACCTAG+TCCGCATA
TGAGTCTGTAATCCTGCTGTCTGCTTAAGAGCATCTGCCAGGTTAGTTACGTTTACCGTCCCCTCAGG
GGTCAAGAATTGCTTTGAGAGTCCATCAAGTGATGACGAACTCCCTTGAAGCGACGCCTGAAATTTCC
+
FFFFFFFFFFFFFFFFFFFFF,FFFFFFFFFFFFFFFFFFFFFFFFFFFFFFFFFFFFFFFFFFFFFFFFFFFFF:FFFFFFFFFFFFFFFF
FFFFFFFFFFFFFFFFFFFFFFFFFFFFFFFFFFFFFFFFFFFFFFFFFFFFFFFFFFFFFFFFFFFFF:FFF
@A00155:342:HHGFNDSXY:1:2660:8124:36793 2:N:0:GAACCTAG+TCCGCATA
GAGTCTGTAATCCTGCTGTCTGCTTAAGAGCATCTGCCAGGTTAGTTATGTTTTACCGTCCCCTCAGGG
GTCAAGAATTGCTTTGAGAGTCCATCAAGTGATGACGAACTCCCTTGAAGCGACGCCTGAAATTTCC
+

```

FFFFFFFFFFFFFFF:FFFFFFFFFFFFFFF:FFFFFFFFFFFFFFF:FFFFFFFFFFFFFFF  
FFFFFFFFFFFFFFF:FFFFFFFFFFFFFFF:FFFFF,FFFFFFFFFFFFFFF  
@A00155:342:HHGFNDSXY:1:2622:20961:32315 2:N:0:GAACCTAG+TCCGCATA  
GAGTCTGTAATCCTGCTGTCTGCTTAAGAGCATCTGCCAGGTTAGTTATGTTTACCGTCCCCTCAGGG  
GTCAAGAATTGCTTTGAGAGTCCATCAAGTGATGACGAACTCCCTTGAAGCGACGCCTGAAATTTCCC  
+  
FFFFFFFFFFFFFFF:F:FFFFFFFFFFFFFFF  
FFF:FFFFFFFFFFFFFFF:FFFFFFFFFFFFFFF:FFFFFFFFFFFFFFF:FFFFFFFFFFFFFFF  
@A00155:342:HHGFNDSXY:1:1632:23601:2503 2:N:0:GAACCTAG+TCCGCATA  
AGTCTGTAATCCTGCTGTCTGCTTAAGAGCATCTGCCAGGTTAGTTATGTTTACCGTCCCCTCAGGGG  
TCAAGAATTGCTTTGAGAGTCCATCAAGTGATGACGAACTCCCTTGAAGCGACGCCTGAAATTTCCCC  
+  
FFFFFFFFF,FFFFFFFFFFFFFFF:FFF  
FFFFFFFFF:FFFFFFFFFFFFFFF:FFFFFFFFFFFFFFF:FFFFFFFFFFFFFFF:FFFFFFFFFFFFFFF  
@A00155:342:HHGFNDSXY:1:1428:1371:12571 2:N:0:GAACCTAG+TCCGCATA  
AGTCTGTAATCCTGCTGTCTGCTTAAGAGCATCTGCCAGGTTAGTTATGTTTACCGTCCCCTCAGGGG  
TCAAGAATTGCTTTGAGAGTCCATCAAGTGATGACGAACTCCCTTGAAGCGACGCCTGAAATTTCCCC  
+  
FFFFFFFFFFFFFFF:FFFFFFFFF::FFFFFFFFFFFFFFF  
,F:FFFFFFFFFFFFFFF:FFFFFFFFFFFFFFF, :FFFF  
@A00155:342:HHGFNDSXY:1:1667:23665:12289 2:N:0:GAACCTAG+TCCGCATA  
AGTCTGTAATCCTGCTGTCTGCTTAAGAGCATCTGCCAGGTTAGTTATGTTTACCGTCCCCTCAGGGG  
TCAAGAATTGCTTTGAGAGTCCATCAAGTGATGACGAACTCCCTTGAAGCGACGCCTGAAATTTCCCC  
+  
FFFFF:F:FFF,FFF:FFFFFFFFFFFFFFF:FFFFFFFFFFFFFFF:FFFFFFFFFFFFFFF:  
FF:FFFF:FFFFFFFFFFFFFFF:FFFFFFFFFFFFFFF:FFFFFFFFFFFFFFF:FFFFFFFFFFFFFFF  
@A00155:342:HHGFNDSXY:1:2573:24542:35603 2:N:0:GAACCTAG+TCCGCATA  
AGTCTGTAATCCTGCTGTCTGCTTAAGAGCATCTGCCAGGTTAGTTATGTTTACCGTCCCCTCAGGGG  
TCAAGAATTGCTTTGAGAGTCCATCAAGTGATGACGAACTCCCTTGAAGCGACGCCTGAAATTTCCCC  
+  
FF:FFFFFFFFF:FFFFF,:F:FF:FFFFF::F:FFFFFFFFFFFFFFF,FFFFF:FFFFFFFFF  
FF:FF,F,FF,FFFFFFFFFFFFFFF,FFFFFFFFFFFFFFF,FFFFFFFFFFFFFFF,FFFFFFFFFFFFFFF  
@A00155:342:HHGFNDSXY:1:2426:11659:8061 2:N:0:GAACCTAG+TCCGCATA  
AGTCTGTAATCCTGCTGTCTGCTTAAGAGCATCTGCCAGGTTAGTTATGTTTACCGTCCCCTCAGGGG  
TCAAGAATTGCTTTGAGAGTCCATCAAGTGATGACGAACTCCCTTGAAGCGACGCCTGAAATTTCCCC  
+  
FFFF:FFFFFFFFFFFFFFF:FFF:FFFFFFFFFFFFFFF,FFFFFFFFFFFFFFF:FFFFFFFFF  
FF:FFFFFFFFFFFFFFF:FFFFFFFFFFFFFFF:FFFFFFFFFFFFFFF:FFFFFFFFFFFFFFF:FFFFFFFFF  
@A00155:342:HHGFNDSXY:1:1219:22498:8797 2:N:0:GAACCTAG+TCCGCATA  
AGTCTGTAATCCTGCTGTCTGCTTAAGAGCATCTGCCAGGTTAGTTATGTTTACCGTCCCCTCAGGGG  
TCAAGAATTGCTTTGAGAGTCCATCAAGTGATGACGAACTCCCTTGAAGCGACGCCTGAAATTTCCCC  
+  
FFFFFFFFFFFFFFF:FFFFFFFFFFFFFFF:FFFFFFFFFFFFFFF:FFFFFFFFFFFFFFF:FFFFFFFFF  
FF:FFFFFFFFFFFFFFF:FFFFFFFFFFFFFFF:FFFFFFFFFFFFFFF:FFFFFFFFFFFFFFF:FFFFFFFFF  
@A00155:342:HHGFNDSXY:1:1169:14434:22294 2:N:0:GAACCTAG+TCCGCATA  
AGTCTGTAATCCTGCTGTCTGCTTAAGAGCATCTGCCAGGTTAGTTATGTTTACCGTCCCCTCAGGGG  
TCAAGAATTGCTTTGAGAGTCCATCAAGTGATGACGAACTCCCTTGAAGCGACGCCTGAAATTTCCCC  
+  
FF:FFFFFFFFFFFF,FFFFFFFFF:FFFFFFFFFFFFFFF:FFFFFFFFFFFFFFF:FFFFF  
FF,FFFFFFFFFFFF:FFFFFFFFFFFFFFF:FFFFFFFFFFFFFFF:FFFFFFFFFFFFFFF:FFFFF  
@A00155:342:HHGFNDSXY:1:1205:6822:26678 2:N:0:GAACCTAG+TCCGCATA  
GTCTGTAATCCTGCTGTCTGCTTAAGAGCATCTGCCAGGTTAGTTATGTTTACCGTCCCCTCAGGGGT  
CAAGAATTGCTTTGAGAGTCCATCAAGTGATGACGAACTCCCTTGAAGCGACGCCTGAAATTC

FF,FFF:,F:FFFFFF:FFFFFFFFFFFFFFFFFFFFFFFF:F:FFFF,FFF,FFFFFFFFFFFFFFFFFFFF  
F:FFFF,FFFFFFFFFFFFFFFFFFFFFFFF,,FFFFFFFFFF,FFFF,FF:F,FFFFFF:FFF:F,  
@A00155:342:HHGFNDSXY:1:1378:24180:16658 2:N:0:GAACCTAG+TCCGCATA  
GTCTGTAATCCTGCTGTCTGCTTAAGAGCATCTGCCAGGTTAGTTATGTTTACCGTCCCCTCAGGGGT  
CAAGAATTGCTTTGAGAGTCCATCAAGTGATGACGAACCTCCTTGAAGCGACGCCTGAAATTTCCCC  
+  
FFFFFFFFFFFFFFFFFFFFFFFFFFFFFFFFFFFFFFFF:FFFFFFFFFFFFFFFFFFFFFFFFFFFFFFFFFFFF  
FFFFFFFFFFFFFFFFFFFFFFFFFFFFFFFFFFFFFFFF:FFFFFFFF:FFFFFFFFFFFFFFFFFFFFFFFFFFFF  
@A00155:342:HHGFNDSXY:1:1449:6759:20306 2:N:0:GAACCTAG+TCCGCATA  
GTCTGTAATCCTGCTGTCTGCTTAAGAGCATCTGCCAGGTTAGTTATGTTTACCGTCCCCTCAGGGGT  
CAAGAATTGCTTTGAGAGTCCATCAAGTGATGACGAACCTCCTTGAAGCGACGCCTGAAATTTCCCCA  
+  
:FFFFFFFFFF:FFFFFFFFFFFF:FFFFFF,FFFFFFFFFF:FFFFFFFFFFFFFFFFFFFFFFFFFFFF  
F:FFFFFFFFFFFFFFFFFFFFFFFFFFFFFFFFFFFFFFFFFFFFFFFFFFFFFFFFFFFFFFFF:FFFFFFFFFFFFF  
@A00155:342:HHGFNDSXY:1:1133:26295:3850 2:N:0:GAACCTAG+TCCGCATA  
GTCTGTAATCCTGCTGTCTGCTTAAGAGCATCTGCCAGGTTAGTTATGTTTACCGTCCCCTCAGGGGT  
CAAGAATTGCTTTGAGAGTCCATCAAGTGATGACGAACCTCCTTGAAGCGACGCCTGAAATTTCCCCA  
+  
FFFFFFFFF:FFFFFFFFFFFF:FFFFFFFFFF:FF,FFFFFFFFFFFF:FFFFFFFFF:,FFFFFFFFF  
F:FFFFFFFFFFFF,FFF,FFFFFFFFFFFF:FFFFFFFFFFFFFFFFFFFF,FFFF:,F:FFFF:F,FF:F  
@A00155:342:HHGFNDSXY:1:2126:27001:36323 2:N:0:GAACCTAG+TCCGCATA  
GTCTGTAATCCTGCTGTCTGCTTAAGAGCATCTGCCAGGTTAGTTATGTTTACCGTCCCCTCAGGGGT  
CAAGAATTGCTTTGAGAGTCCATCAAGTGATGACGAACCTCCTTGAAGCGACGCCTGAAATTTCCCCA  
+  
F:FFFFFFFFFFFFFFFFFFFFFFFFFFFFFFFFFFFFFFFF:FFFFFFFFFFFF:FFFFFF:FFFFFFFFFFFFFFFFFFFF  
:FFFFF:FFFFFFFFFFFFFFFFFFFFFFFFFFFFFFFFFFFFFFFFFFFFFFFFFFFFFFFFFFFFFFFF, :FFFFF  
@A00155:342:HHGFNDSXY:1:2454:26639:20134 2:N:0:GAACCTAG+TCCGCATA  
GTCTGTAATCCTGCTGTCTGATTAAGAGCATCTGCCAGGTTAGTTATGTTTACCGTCCCCTCAGGGGT  
CAAGAATTGCTTTGAGAGTCCATCAAGTGATGACGAACCTCCTTGAAGCGACGCCTGAAATTTCCCCA  
+  
:FFF:FFFFFFFFFFFFFFFFFFFFFFFFFFFFFFFFFFFFFFFF:FFFFFFFFFFFF:FFFFFFFFFFFFFFFFFFFF  
F:FFFFFFFFFFFFFFFFFFFFFFFFFFFFFFFFFFFFFFFFFFFFFFFFFFFFFFFFFFFFFFFFFFFFFFFFFFFF  
@A00155:342:HHGFNDSXY:1:2609:17463:26443 2:N:0:GAACCTAG+TCCGCATA  
GTCTGTAATCCTGCTGTCTGCTTAAGAGCATCTGCCAGGTTAGTTATGTTTACCGTCCCCTCAGGGGT  
CAAGAATTGCTTTGAGAGTCCATCAAGTGATGACGAACCTCCTTGAAGCGACGCCTGAAATTTCCCCA  
+  
FFFFFFFFFFFFFFFFFFFF:FFFF:FFFFFFFFFFFFFFFFFFFFFFFFFFFFFFFF:FFFFFFFFFFFFFFFFFFFF  
FFFFFFFFFFFFFFFFFFFFFFFFFFFFFFFFFFFFFFFFFFFFFFFFFFFFFFFFFFFFFFFFFFFFFFFFFFFF:FFF:FFFFF  
@A00155:342:HHGFNDSXY:1:1441:18629:19351 2:N:0:GAACCTAG+TCCGCATA  
GTCTGTAATCCTGCTGTCTGCTTAAGAGCATCTGCCAGGTTAGTTATGTTTACCGTCCCCTCAGGGGT  
CAAGAATTGCTTTGAGAGTCCATCAAGTGATGACGAACCTCCTTGAAGCGACGCCTGAAATTTCCCCA  
+  
FFFFFFFFFF,FFFFFF:FF:FFF:FF:FFF:FF:FFFFFFFF: :FFFFFF:FFFFFFFFFFFFFFFFFFFF  
F:F:FFFFFFFFFFFF:FFFFFFFFFFFFFFFFFFFFFFFF:FFFFFFFFFFFFFFFFFFFFFFFFFFFFFFFFFFFF  
@A00155:342:HHGFNDSXY:1:1441:16640:20509 2:N:0:GAACCTAG+TCCGCATA  
GTCTGTAATCCTGCTGTCTGCTTAAGAGCATCTGCCAGGTTAGTTATGTTTACCGTCCCCTCAGGGGT  
CAAGAATTGCTTTGAGAGTCCATCAAGTGATGACGAACCTCCTTGAAGCGACGCCTGAAATTTCCCCA  
+  
FFFFF,FFFFFFFFFFFFFFFFFFFFFFFFFFFFFFFFFFFFFFFF:F: :FFFFF:FFFFFFFFFFFFFFFF,FFFFFFFF  
:,FFFFFFFFF,FFFFFFFFF:FFFFFFFFFFFFFFFF:FFFFFFFFFFFFFFFFFFFFFFFFFFFFFFFF: :FFFF,  
@A00155:342:HHGFNDSXY:1:1645:8314:25786 2:N:0:GAACCTAG+TCCGCATA  
TGTAATCCTGCTGTCTGCTTAAGAGCATCTGCCAGGTTAGTTATGTTTACCGTCCCCTCAGGGGTCAA  
GAATTGCTTTGAGAGTCCATCAAGTGATGACGAACCTCCTTGAAGCGACGCCTGAAATTTTC  
+

FFFFFFFF:FF,FFFFFFFF,FFFFF:F,:F:FFFF:FFFFFFFF:FFFFFFFF:FFFFFFFF:FF:FFFFFFFF  
FFFFFFFFFFFF,FFFFFF,FFF:FFF:FFF::FF:FFF:FFFFFFFFFFFF:FF:FFF:F:F,  
@A00155:342:HHGFNDSXY:1:1131:14714:7999 2:N:0:GAACCTAG+TCCGCATA  
GTAATCCTGCTGTCTGCTTAAGAGCATCTGCCAGGTTAGTTATGTTTACCGTCCCCTCAGGGGTCAAG  
AATTGCTTTGAGAGTCCATCAAGTGATGACGAACTCCCTTGAAGCGACGCCTGAAATTTCCCCACTGC  
+  
FFFFFFFFFFFFFFFFFFFFFFFFFFFFFFFFFFFFFFFFFFFFFFFFFFFFFFFFFFFFFFFFFFFFFFFF  
FFFFFFFFFFFFFFFFFFFFFFFFFFFFFFFFFFFFFFFFFFFFFFFFFFFFFFFFFFFFFFFFFFFFFFFF  
@A00155:342:HHGFNDSXY:1:1420:10294:3850 1:N:0:GAACCTAG+TCCGCATA  
AATCCTGCTGTCTGCTTAAGAGCATCTGCCAGGTTAGTTATGTTTACCGTCCCCTCAGGGGTCAAGAA  
TTGCTTTGAGAGTCCATCAAGTGATGACGAACTCCCTTGAAGCGACGCCTGAAATTTCCCCACTGCAG  
+  
FFFFFFFFFFFFFFFFFFFFFFFFFFFFFFFFFFFFFFFF,FFFFFF:FFFFFFFFFFFFFFFFFFFFFFFF  
FFFFFFFF:FFFFFFFFFFFFFFFF:FFFFFFFFFFFFFFFFFFFFFFFFFFFFFFFFFFFFFFFFFFFF  
@A00155:342:HHGFNDSXY:1:1169:14434:22294 1:N:0:GAACCTAG+TCCGCATA  
AATCCTGCTGTCTGCTTAAGAGCATCTGCCAGGTTAGTTATGTTTACCGTCCCCTCAGGGGTCAAGAA  
TTGCTTTGAGAGTCCATCAAGTGATGACGAACTCCCTTGAAGCGACGCCTGAAATTTCCCCACTGCAG  
+  
FFFFFFFFFFFFFFFFFFFFFFFFFFFFFFFFFFFFFFFF:FFFFFFFFFFFFFFFFFFFFFFFFFFFFFFFF  
FFFFFFFFFFFFFFFFFFFFFFFFFFFFFFFFFFFFFFFFFFFFFFFFFFFFFFFFFFFFFFFFFFFFFFFF  
@A00155:342:HHGFNDSXY:1:2217:15058:29857 2:N:0:GAACCTAG+TCCGCATA  
CCTGCTGTCTGCTTAAGAGCATCTGCCAGGTTAGTTATGTTTACCGTCCCCTCAGGGGTCAAGAATTG  
CTTTGAGAGTCCATCAAGTGATGACGAACTCCCTTGAAGCGACGCCTGAAATTTCCCCACTGCAGTCA  
+  
:F:FFFFFFFFFFFFFFFFFFFFFFFF:FFFFFF:FFFF,FFFFFF:FF:FFFFFFFFFFFFFFFFFFFF,F  
FFFFFFFFFFFFFFFF,FFFFFF:FFFF:FFF:FFFFFFFFFFFFFFFFFFFFFFFFFFFFFFFFFFFF::F:  
@A00155:342:HHGFNDSXY:1:1219:22498:8797 1:N:0:GAACCTAG+TCCGCATA  
CTGCTGTCTGCTTAAGAGCATCTGCCAGGTTAGTTATGTTTACCGTCCCCTCAGGGGTCAAGAATTGC  
TTTGAGAGTCCATCAAGTGATGACGAACTCCCTTGAAGCGACGCCTGAAATTTCCCCACTGCAGTCAT  
+  
FFFFFFFFFFFFFFFFFFFFFFFFFFFFFFFFFFFFFFFF,FFFFFFFFFFFFFFFFFFFFFFFFFFFFFFFF  
FFFFF:FFFFFFFFFFFFFFFFFFFFFFFFFFFFFFFF:FFFFFFFFFFFF:FF:FFFFFFFFFFFF  
@A00155:342:HHGFNDSXY:1:2547:30843:24533 1:N:0:GAACCTAG+TCCGCATA  
CTGCTGTCTGCTTAAGAGCATCTGCCAGGTTAGTTATGTTTACCGTCCCCTCAGGGGTCAAGAATTGC  
TTTGAGAGTCCATCAAGTGATGACGAACTCCCATGAAGCGACGCCTGAAATTTCCCCACTGCAGTCAT  
+  
FFFFFFFFFFFFFFFFFFFFFFFFFFFFFFFFFFFFFFFF:FFFFFFFFFFFFFFFFFFFFFFFFFFFFFFFF  
FFFFFFFFFFFFFFFFFFFFFFFFFFFFFFFFFFFFFFFF,FFFFFFFFFFFFFFFFFFFFFFFFFFFFFFFF  
@A00155:342:HHGFNDSXY:1:1338:12933:26083 1:N:0:GAACCTAG+TCCGCATA  
TGCTGTCTGCTTAAGAGCATCTGCCAGGTTAGTTATGTTTACCGTCCCCTCAGGGGTCAAGAATTGCT  
TTGAGAGTCCATCAAGTGATGACGAACTCCCTTGAAGCGACGCCTGAAATTTCCCCACTGCAGTCATC  
+  
FFFFFFFFFFFFFFFFFFFFFFFFFFFFFFFFFFFFFFFFFFFFFFFFFFFFFFFFFFFFFFFFFFFFFFFF  
FFFFFFFFFFFFFFFFFFFFFFFFFFFFFFFFFFFFFFFFFFFFFFFFFFFFFFFFFFFFFFFFFFFFFFFF:FFFFFFFFFFFF  
@A00155:342:HHGFNDSXY:1:1524:30563:11021 1:N:0:GAACCTAG+TCCGCATA  
TGCTGTCTGCTTAAGAGCATCTGCCAGGTTAGTTATGTTTACCGTCCCCTCAGGGGTCAAGAATTGCT  
TTGAGAGTCCATCAAGTGATGACGAACTCCCTTGAAGCGACGCCTGAAATTTCCCCACTGCAGTCATC  
+  
FFFFFFFFFFFFFFFFFFFFFFFFFFFFFFFFFFFFFFFF,:FFFFFFFFFFFFFFFFFFFFFFFFFFFFFFFF  
FFFFFFFFFFFFFFFFFFFFFFFFFFFFFFFFFFFFFFFFFFFFFFFFFFFFFFFFFFFFFFFFFFFFFFFF  
@A00155:342:HHGFNDSXY:1:2118:3875:11992 1:N:0:GAACCTAG+TCCGCATA  
TGCTGTCTGCTTAAGAGCATCTGCCAGGTTAGTTATGTTTACCGTCCCCTCAGGGGTCAAGAATTGCT  
TTGAGAGTCCATCAAGTGATGACGAACTCCCTTGAAGCGACGCCTGAAATTTCCCCACTGCAGTCATC  
+

FFFFFFFFFFFFFFFFFFFFFFFFFFFFFFFFFFFFFFFFFFFFFFFFFFFFFFFFFFFFFFFFFFFFFFFFFFFFFFFF  
FFFFFFFFFFFFFFFFFFFFFFFFFFFFFFFFFFFFFFFFFFFFFFFFFFFFFFFFFFFFFFFFFFFFFFFFFFFFFFFF:  
@A00155:342:HHGFNDSXY:1:2250:14552:30639 1:N:0:GAACCTAG+TCCGCATA  
TGCTGTCTGCTTAAGAGCATCTGCCAGGTTAGTTATGTTTACCGTCCCCTCAGGGGTCAAGAATTGCT  
TTGAGAGTCCATCAAGTGATGACGAACCTCCCTTGAAGCGACGCCTGAAATTTCCCCACTGCAGTCATC  
+  
FFFFFFFFFFFFFFFFFFFFFFFFFFFFFFFFFFFFFFFFFFFFFFFFFFFFFFFFFFFFFFFFFFFFFFFFFFFFFFFF  
FFFFFFFFFFFFFFFFFFFFFFFFFFFFFFFFFFFFFFFFFFFFFFFFFFFFFFFFFFFFFFFFFFFFFFFFFFFFFFFF:  
@A00155:342:HHGFNDSXY:1:2250:14705:30436 1:N:0:GAACCTAG+TCCGCATA  
TGCTGTCTGCTTAAGAGCATCTGCCAGGTTAGTTATGTTTACCGTCCCCTCAGGGGTCAAGAATTGCT  
TTGAGAGTCCATCAAGTGATGACGAACCTCCCTTGAAGCGACGCCTGAAATTTCCCCACTGCAGTCATC  
+  
FFFFFFFFFFFFFFFFFFFFFFFFFFFFFFFFFFFFFFFFFFFFFFFFFFFFFFFFFFFFFFFFFFFFFFFFFFFFFFFF  
FFFFFFFFFFFFFFFFFFFFFFFFFFFFFFFFFFFFFFFFFFFFFFFFFFFFFFFFFFFFFFFFFFFFFFFFFFFFFFFF,FF  
@A00155:342:HHGFNDSXY:1:2254:18783:23844 1:N:0:GAACCTAG+TCCGCATA  
TGCTGTCTGCTTAAGAGCATCTGCCAGGTTAGTTATGTTTACCGTCCCCTCAGGGGTCAAGAATTGCT  
TTGAGAGTCCATCAAGTGATGACGAACCTCCCTTGAAGCGACGCCTGAAATTTCCCCACTGCAGTCATC  
+  
FFFFFFFFFFFFFFFFFFFFFFFFFFFFFFFFFFFFFFFFFFFFFFFFFFFFFFFFFFFFFFFFFFFFFFFFFFFFFFFF  
FFFFFFFFFFFFFFFFFFFFFFFFFFFFFFFFFFFFFFFFFFFFFFFFFFFFFFFFFFFFFFFFFFFFFFFFFFFFFFFF:  
@A00155:342:HHGFNDSXY:1:2605:20103:30295 1:N:0:GAACCTAG+TCCGCATA  
TGCTGTCTGCTTAAGAGCATCTGCCAGGTTAGTTATGTTTACCGTCCCCTCAGGGGTCAAGAATTGCT  
TTGAGAGTCCATCAAGTGATGACGAACCTCCCTTGAAGCGACGCCTGAAATTTCCCCACTGCAGTCATC  
+  
FFFFFFFFFFFFFFFFFFFFFFFFFFFFFFFFFFFFFFFFFFFFFFFFFFFFFFFFFFFFFFFFFFFFFFFFFFFFFFFF  
FFFFFFFFFFFFFFFFFFFFFFFFFFFFFFFFFFFFFFFFFFFFFFFFFFFFFFFFFFFFFFFFFFFFFFFFFFFFFFFF:  
@A00155:342:HHGFNDSXY:1:2143:11053:24799 1:N:0:GAACCTAG+TCCGCATA  
TGCTGTCTGCTTAAGAGCATCTGCCAGGTTAGTTATGTTTACCGTCCCCTCAGGGGTCAAGAATTGCT  
TTGAGAGTCCATCAAGTGATGACGAACCTCCCTTGAAGCGACGCCTGAAATTTCCCCACTGCAGTCATC  
+  
FFFFFFFFFFFFFFFFFFFFFFFFFFFFFFFFFFFFFFFFFFFFFFFFFFFFFFFFFFFFFFFFFFFFFFFFFFFFFFFF  
FFFFFFFFFFFFFFFFFFFFFFFFFFFFFFFFFFFFFFFFFFFFFFFFFFFFFFFFFFFFFFFFFFFFFFFFFFFFFFFF:  
@A00155:342:HHGFNDSXY:1:2639:10276:14121 1:N:0:GAACCTAG+TCCGCATA  
TGCTGTCTGCTTAAGAGCATCTGCCAGGTTAGTTATGTTTACCGTCCCCTCAGGGGTCAAGAATTGCT  
TTGAGAGTCCATCAAGTGATGACGAACCTCCCTTGAAGCGACGCCTGAAATTTCCCCACTGCAGTCATC  
+  
FFFFFFFFFFFFFFFFFFFFFFFFFFFFFFFFFFFFFFFFFFFFFFFFFFFFFFFFFFFFFFFFFFFFFFFFFFFFFFFF  
FFFFFFFFFFFFFFFFFFFFFFFFFFFFFFFFFFFFFFFFFFFFFFFFFFFFFFFFFFFFFFFFFFFFFFFFFFFFFFFF:  
@A00155:342:HHGFNDSXY:1:2250:14705:30436 2:N:0:GAACCTAG+TCCGCATA  
GCTGTCTGCTTAAGAGCATCTGCCAGGTTAGTTATGTTTACCGTCCCCTCAGGGGTCAAGAATTGCTT  
TGAGAGTCCATCAAGTGATGACGAACCTCCCTTGAAGCGACGCCTGAAATTTCCCCACTGCAGTCATCT  
+  
FF,:FF:FFFFFFFFFFFFFFFFFFFFFFFFFFFFFFFFFFFFFFFF,FF,:F,FFF:FFFFFFFFFFFFFFFF,FFF:,FFFF  
FFFFFFFFFFFFFFFFFFFFFFFFFFFFFFFFFFFFFFFFFFFFFFFFFFFFFFFFFFFFFFFFFFFFFFFF,FFFFFFFF,FF:FFFF:FF  
@A00155:342:HHGFNDSXY:1:2250:14552:30639 2:N:0:GAACCTAG+TCCGCATA  
GCTGTCTGCTTAAGAGCATCTGCCAGGTTAGTTATGTTTACCGTCCCCTCAGGGGTCAAGAATTGCTT  
TGAGAGTCCATCAAGTGATGACGAACCTCCCTTGAAGCGACGCCTGAAATTTCCCCACTGCAGTCATCT  
+  
FFFFFFFFFFFFFFFFFFFFFFFFFFFFFFFFFFFFFFFFFFFFFFFFFFFFFFFFFFFFFFFFFFFFFFFFFFFFFFFF  
FFFFFFFFFFFFFFFFFFFFFFFFFFFFFFFFFFFFFFFFFFFFFFFFFFFFFFFFFFFFFFFFFFFFFFFFFFFFFFFF:FF  
@A00155:342:HHGFNDSXY:1:2450:4761:19413 2:N:0:GAACCTAG+TCCGCATA  
GCTGTCTTCTTAAGAGCATCTGCCAGGTTAGTTATGTTTACCGTCCCCTCAGGGGTCAAGAATTGCTT  
TGAGAGTCCATCAAGTGATGACGAACCTCCCTTGAAGCGACGCCTGAAATTTCCCCACTGCAGTCATCT  
+

F,,:FF,:FF:FF,:FF:FFFF:FF,FFFF,FFF,,F:F:FFFFFF:F:FF,F:F:FF,F::FFF:  
,FFFF:,FFF:FFFF,:FFF:FFFFFF:FFFF:F:,FFFFFFFFFFFF::FFFFFF:FFFF,F:FF,F,F  
@A00155:342:HHGFNDSXY:1:2660:8124:36793 1:N:0:GAACCTAG+TCCGCATA  
GCTGTCTGCTTAAGAGCATCTGCCAGGTTAGTTATGTTTACCGTCCCCTCAGGGGTCAAGAATTGCTT  
TGAGAGTCCATCAAGTGATGACGAACTCCCTTGAAGCGACGCCTGAAATTTCCCCACTGCAGTCATCT  
+  
FFFFFFFFFFFFFFFFFFFFFFFFFFFFFFFFFFFFFFFFFFFFFFFFFFFFFFFFFFFFFFFFFFFFFFFFFFFF:FFFFFFFFFFFF  
FFFFFFFFFFFFFFFFFFFFFFFFFFFFFFFFFFFFFFFFFFFFFFFFFFFFFFFFFFFFFFFFFFFFFFFFFFFF,FFFFFFFFFFFFF  
@A00155:342:HHGFNDSXY:1:1367:23330:24862 2:N:0:GAACCTAG+TCCGCATA  
GCTGTCTGCTTAAGAGCATCTGCCAGGTTAGTTATGTTTACCGTCCCCTCAGGGGTCAAGAATTGCTT  
TGAGAGTCCATCAAGTGATGACGAACTCCCTTGAAGCGACGCCTGAAATTTCCCCACTGCAGTCATCT  
+  
FF:FFFFFFFFFFFFFFFFFFFFFFFFFFFFFFFFFFFFFFFFFFFFFFFFFFFFFFFFFFFFFFFFFFFFFFFFFFFF  
FFFFFFFFFFFFFFFFFFFFFFFFFFFFFFFFFFFFFFFFFFFFFFFFFFFFFFFFFFFFFFFFFFFFFFFFFFFF:FFFFFFFFFFFF:FFFFFFFFFFFF:FFFFFFFFFFFFF  
@A00155:342:HHGFNDSXY:1:1133:26295:3850 1:N:0:GAACCTAG+TCCGCATA  
GCTGTCTGCTTAAGAGCATCTGCCAGGTTAGTTATGTTTACCGTCCCCTCAGGGGTCAAGAATTGCTT  
TGAGAGTCCATCAAGTGATGACGAACTCCCTTGAAGCGACGCCTGAAATTTCCCCACTGCAGTCATCT  
+  
FFFF:FFF:FFFFFF:FF:FFFFFFFF,FFFFFFFF,FFFF:F::FFFFFFFFFFFFFFFF:FFFF:F,  
FFFFFFFF:FFFFFFFFFFFF:FFFFFF,F:FFFF:,FF::FFFFFFFFFFFF,FFFFFFFF,FFFF  
@A00155:342:HHGFNDSXY:1:1124:15429:23390 2:N:0:GAACCTAG+TCCGCATA  
GCTGTCTGCTTAAGAGCATCTGCCAGGTTAGTTATGTTTACCGTCCCCTCAGGGGTCAAGAATTGCTT  
TGAGAGTCCATCAAGTGATGACGAACTCCCTTGAAGCGACGCCTGAAATTTCCCCACTGCAGTCATCT  
+  
FFFFFFFFFFFFFFFFFFFFFFFFFFFF:FFFFFFFFFFFF,FFFFFFFF:FFFF:FFFFFFFFFFFFFFFF:FFF:F  
FFFFFFFFFFFFFFFFFFFFFFFFFFFFFFFFFFFFFFFFFFFFFFFFFFFFFFFFFFFFFFFFFFFFFFFFFFFF:F,  
@A00155:342:HHGFNDSXY:1:1224:24424:8656 2:N:0:GAACCTAG+TCCGCATA  
GCTGTCTGCTTAAGAGCATCTGCCAGGTTAGTTATGTTTACCGTCCCCTCAGGGGTCAAGAATTGCTT  
TGAGAGTCCATCAAGTGATGACGAACTCCCTTGAAGCGACGCCTGAAATTTCCCCACTGCAGTCATCT  
+  
FFFF:FFFF:F,FFFFFFFF:FFFFFFFFFFFFFFFF,FFFFFFFFFFFF,FFF:FFFFFFFF,FFF:F  
FFFFFFFFFFFFFFFFFFFFFFFFFFFFFFFFFFFFFFFFFFFFFFFFFFFFFFFFFFFFFFFFFFFFFFFFFFFF:FFFFFFFF:F:FFFFFFFF:FFF:FF,FF,F:  
@A00155:342:HHGFNDSXY:1:2216:19126:9095 2:N:0:GAACCTAG+TCCGCATA  
GCTGTCTGCTTAAGAGCATCTGCCAGGTTAGTTATGTTTACCGTCCCCTCAGGGGTCAAGAATTGCTT  
TGAGAGTCCATCAAGTGATGACGAACTCCCTTGAAGCGACGCCTGAAATTTCCCCACTGCAGTCATCT  
+  
FFFFFFFFFFFFFFFFFFFFFFFFFFFFFFFFFFFFFFFFFFFFFFFFFFFFFFFFFFFFFFFFFFFFFFFFFFFF:FFFFFFFFFFFF  
FFFFFFFFFFFFFFFFFFFFFFFFFFFFFFFFFFFFFFFFFFFFFFFFFFFFFFFFFFFFFFFFFFFFFFFFFFFFF  
@A00155:342:HHGFNDSXY:1:1444:8097:18239 2:N:0:GAACCTAG+TCCGCATA  
CTGTCTGCTTAAGAGCATCTGCCAGGTTAGTTATGTTTACCGTCCCCTCAGGGGTCAAGAATTGCTT  
GAGAGTCCATCAAGTGATGACGAACTCCCTTGAAGCGACGCCTGAAATTTCCCCACTGCAGTCATCT  
+  
:,F:FFFFFFFF:FF:FFFFFFFFFFFF:,,,,:FFFF,FFFFFFFF:FF:FFFF,::,FF,:F  
F:FFFFFF::F,,F,F::FFF:F:FFFF:F:FFFF:FFFF,FFFF,FFFF,F:F,FFF,FF:FF  
@A00155:342:HHGFNDSXY:1:1254:9136:22795 2:N:0:GAACCTAG+TCCGCATA  
CTGTCTGCTTAAGAGCATCTGCCAGGTTAGTTATGTTTACCGTCCCCTCAGGGGTCAAGAATTGCTT  
GAGAGTCCATCAAGTGATGACGAACTCCCTTGAAGCGACGCCTGAAATTTCCCCACTGCAGTCATCT  
+  
FFFFFFFFFFFFFF:FFFFFFFF:F:FFFFFFFFFFFFFFFFFFFFFFFF,FFFFFFFFFFFF:FF:FF  
FFFFFFFF:FFFF,FFFFFFFFFFFFFFFFFFFFFFFFFFFF:F:FFFFFFFFFFFFFFFF:FFF,F  
@A00155:342:HHGFNDSXY:1:2140:31358:11334 2:N:0:GAACCTAG+TCCGCATA  
TGTCTGCTTAAGAGCATCTGCCAGGTTAGTTATGTTTACCGTCCCCTCAGGGGTCAAGAATTGCTT  
AGAGTCCATCAAGTGATGACGAACTCCCTTGAAGCGACGCCTGAAATTTCCCCACTGCAGTCATCTTC  
+

FFFFFFFFFFFFFFFFFFFFFFFFFFFFFFFFFFFFFFFFFFFFFFFFFFFFFFFFFFFFFFFFFFFFF, FFFFFFFF  
FFFFFFFFFFFFFFFFFFFFFFFFFFFFFFFFFFFFFFFFFFFFFFFFFFFFFFFFFFFFFFFFFFFF::FFFF:FFFFFFFFFFFFFFFF  
@A00155:342:HHGFNDSXY:1:1205:6822:26678 1:N:0:GAACCTAG+TCCGCATA  
GTCTGCTTAAGAGCATCTGCCAGGTTAGTTATGTTTACCGTCCCCTCAGGGGTCAAGAATTGCTTTGA  
GAGTCCATCAAGTGATGACGAACTCCCTTGAAGCGACGCCTGAAATTTCCCCACTGCAGTCATC  
+  
FFFFFFFFFFFFFFFFFFFFFFFFFFFFFFFFFFFFFFFFFFFFFFFFFFFFFFFFFFFFFFFFFFFFF:  
FFFFFFFFFFFFFFFFFFFFFFFFFFFFFFFFFFFFFFFFFFFFFFFFFFFFFFFFFFFFFFFFFFFF:FFFF:FFFFFFFFFFFF  
@A00155:342:HHGFNDSXY:1:2321:10691:28401 2:N:0:GAACCTAG+TCCGCATA  
GTCTGCTTAAGAGCATCTGCCAGGTTAGTTATGTTTACCGTCCCCTCAGGGGTCAAGAATTGCTTTGA  
GAGTCCATCAAGTGATGACGAACTCCCTTGAAGCGACGCCTGAAATTTCCCCACTGCAGTCATCTTCT  
+  
FFFFFFFFFFF:FFFFFFFF:FFFFFFFFFFFF:FFFFF:,FFF,FFFFFFFF:,FF,FFFFFF,FFF,FFFF  
FFFFFFFF:F:,,:,:, :FFFFFFFFFFFF,FFF,FFF,FFFF,F,FF:F:FFFF,FFFFFF,FF,FF:FF  
@A00155:342:HHGFNDSXY:1:2461:10890:17660 1:N:0:GAACCTAG+TCCGCATA  
GTCTGCTTAAGAGCATCTGCCAGGTTAGTTATGTTTACCGTCCCCTCAGGGGTCAAGAATTGCTTTGA  
GAGTCCATCAAGTGATGACGAACTCCCTTGAAGCGACGCCTGAAATTTCCCCACTGCAGTCATCTTCT  
+  
FFFFFFFFFFFFFFFFFFFF:FFFFFFFFFFFFFFFFFFFFFFFFFFFFFFFFFFFFFFFFFFFFFFFFFFFF:FFFF  
FFFFFFFFFFFFFFFFFFFFFFFFFFFFFFFFFFFFFFFFFFFFFFFFFFFFFFFFFFFFFFFFFFFF:FFFF  
@A00155:342:HHGFNDSXY:1:2206:15383:23813 2:N:0:GAACCTAG+TCCGCATA  
TCTGCTTAAGAGCATCTGCCAGGTTAGTTATGTTTACCGTCCCCTCAGGGGTCAAGAATTGCTTTGAG  
AGTCCATCAAGTGATGACGAACTCCCTTGAAGCGACGCCTGAAATTTCCCCACTGCAGTCATCTTCTG  
+  
FFFFFFFFFFFFFFFFFFFFFFFFFFFFFFFFFFFFFFFFFFFFFFFFFFFFFFFFFFFFFFFFFFFFF:  
FFFFFFFFFFFFFFFFFFFFFFFFFFFFFFFFFFFFFFFFFFFFFFFFFFFFFFFFFFFFFFFFFFFF::FFFFF  
@A00155:342:HHGFNDSXY:1:2336:24867:28338 2:N:0:GAACCTAG+TCCGCATA  
CTGCTTAAGAGCATCTGCCAGGTTAGTTATGTTTACCGTCCCCTCAGGGGTCAAGAATTGCTTTGAG  
AGTCCATCAAGTGATGACGAACTCCCTTGAAGCGACGCCTGAAATTTCCCCACTGCAGTCATCTTCTG  
+  
FFFFFFFFFFFFFFFFFFFF:FFFFFFFFFFFFFFFFFFFFFFFFFFFF:FFFFFFFFFFFFFFFFFFFFFFFFFFFF, FFFFFFFFFF  
FFFFF:FFFFFFFFFFFFFFFFFFFFFFFFFFFF:,FFFFFFFFFFFF,FFFFFFFFFFFFFFFF:FFFFF::F,FFFF  
@A00155:342:HHGFNDSXY:1:1524:30563:11021 2:N:0:GAACCTAG+TCCGCATA  
CTGCTTAAGAGCATCTGCCAGGTTAGCTATGTTTACCGTCCCCTCAGGGGTCAAGAATTGCTTTGAGA  
GTCCATCAAGTGATGACGAACTCCCTTGAAGCGACGCCTGAAATTTCCCCACTGCAGTCATCTTCTGC  
+  
FFFFFFFFFFFF:FFF,FFFFFFFFFF:FF,FF:FFF,FFFFFFFFFFFFFFFFFFFFFFFFFFFF:FFFFF,FFFFF  
FFFFFFFFF:FFFFFFFFFFFFFFFFFFFF:F,FFFFFFFFFFFFFFFF:FFFFFFFFFFFFFFFFFFFFFFFFFFFF  
@A00155:342:HHGFNDSXY:1:1141:16712:28776 1:N:0:GAACCTAG+TCCGCATA  
CTGCTTAAGAGCATCTGCCAGGTTAGTTATGTTTACCGTCCCCTCAGGGGTCAAGAATTGCTTTGAGA  
GTCCATCAAGTGATGACGAACTCCCTTGAAGCGACGCCTGAAATTTCCCCACTGCAGTCATCTTCTGC  
+  
FFFFFFFFFFFFFFFFFFFFFFFFFFFF:,FFFFFFFFFFFFFFFFFFFFFFFFFFFFFFFFFFFFFFFFFFFFF  
FFFFFFFFFFFFFFFFFFFFFFFFFFFF:FF:FFFFFFFFFFFFFFFFFFFFFFFFFFFFFFFFFFFFFFFFFFFFF  
@A00155:342:HHGFNDSXY:1:1224:24424:8656 1:N:0:GAACCTAG+TCCGCATA  
CTGCTTAAGAGCATCTGCCAGGTTAGTTATGTTTACCGTCCCCTCAGGGGTCAAGAATTGCTTTGAGA  
GTCCATCAAGTGATGACGAACTCCCTTGAAGCGACGCCTGAAATTTCCCCACTGCAGTCATCTTCTGC  
+  
FFFFF,FFFFFFFFFFFFFFFFF::FFFFFFFFFFFFFFFFFFFFFFFFFFFFFFFFFFFFFFFFFFFFF  
FFFFFFFFFFFFFFFFFFFFFFFFFFFFFFFFFFFFFFFFFFFFFFFFFFFFFFFFFFFFFFFFFFFF:FFFFFFFFFFFFFFFFFFFFF  
@A00155:342:HHGFNDSXY:1:2605:20103:30295 2:N:0:GAACCTAG+TCCGCATA  
CTGCTTAAGAGCATCTGCCAGGTTAGTTATGTTTACCGTCCCCTCAGGGGTCAAGAATTGCTTTGAGA  
GTCCATCAAGTGATGACGAACTCCCTTGAAGCGACGCCTGAAATTTCCCCACTGCAGTCATCTTCTGC  
+



```


FFFFFFFFFFFFFFFFFFFFFFFFFFFFFFFFFFFFFFFFFFFFFFFFFFF:FFFFFFFFFFFFFFFFFFFFFFFFFFFFFFFFFFFF  
FFFFFFFFFFFFFFFFFFFFFFFFFFFFFFFFFFFFFFFFFFFFFFFFFFFFFFFFFFFFFFFFFFFFFFFFFFFFFFFFFFFFFFFFFFFF:  
@A00155:342:HHGFNDSXY:1:1546:19696:27085 2:N:0:GAACCTAG+TCCGCATA  
CTGCTTAAGAGCATCTGCCAGGT TAGTTATGTTTTACCGTCCCCTCAGGGGTCAAGAATTGCTTTGAGA  
GTCCATCAAGTGATGACGAACTCCCTTGAAGCGACGCCTGAAATTTCCCCACTGCAGTCATCTTCTGC  
+



F:FFFFFFFFFFFF:FFFF,FFF,FFF:FFFFFFFFFFFF::FFFFFFFF:F:FFFFFFFF  
FFFFFFFFFFFFFFFF:FF:FF:FFFFF,FFFFFFFFFFFF,FFFF,,FFFFFFFFFFFFFFFF:FFFFFFFF  
@A00155:342:HHGFNDSXY:1:1518:23068:35493 1:N:0:GAACCTAG+TCCGCATA  
CTGCTTAAGAGCATCTGCCAGGT TAGTTATGTTTTACCGTCCCCTCAGGGGTCAAGAATTGCTTTGAGA  
GTCCATCAAGTGATGACGAACTCCCTTGAAGCGACGCCTGAAATTTCCCCACTGCAGTCATCTTCTGC  
+



FFFFFFFFFFFFFFFF:FFFFFFFFFFFF,FFFF,FFFFFFFFFFFFFFFFFFFFFFFFFFFFFFFFFFFFFFFFFFFFFFFFFFFF  
FFFFFFFFFFFFFFFFFFFFFFFFFFFFFFFFFFFFFFFFFFFFFFFFFFFFFFFFFFFFFFFFFFFFFFFFFFFFFFFFFFFFFFFFFFFF  
@A00155:342:HHGFNDSXY:1:1645:8314:25786 1:N:0:GAACCTAG+TCCGCATA  
TGCTTAAGAGCATCTGCCAGGT TAGTTATGTTTTACCGTCCCCTCAGGGGTCAAGAATTGCTTTGAGAG  
TCCATCAAGTGATGACGAACTCCATTGAAGCGACGCCTGAAATTTCCCCACTGCAGTCATC  
+



FFFFF,:FFFFFFFFFFFFFFFF:, :FF:FF:FFFFFFFF:F:FFFFFFFF,F,,FFF:,FFF:, ,FFFF,:  
:,FFFFFFFFF::,FF::FF,F:F,F,,FFF,:F,,FFFF::FFFF:,FFF:F:F:FFF:  
@A00155:342:HHGFNDSXY:1:2171:20428:27195 2:N:0:GAACCTAG+TCCGCATA  
GCTTAAGAGCATCTGCCAGGT TAGTTATGTTTTACCGTCCCCTCAGGGGTCAAGACTTGCTTTGAGAGT  
CCATCAAGTGATGACGAACTCCCTTGAAGCGACGCCTGAAATTTCCCCACTGCAGTCATCTTCTGCAC  
+



FFFFF:FFFFFFFFFFFFFFFFFFFFFFFFFFFFFFFFFFFF:FFFFFFFFFFFF:F:FFFFFFFFFFFF,,FFF:FFFFFFFF  
FFFFFFFFFFFFFFFFFFFFFFFF:FFFFFFFF:F:FFFFFFFFFFFFFFFFFFFF::FFFFFFFFFFFFFFFFFFFF:F,FF,FFFF  
@A00155:342:HHGFNDSXY:1:2223:12102:26929 2:N:0:GAACCTAG+TCCGCATA  
GCTTAAGAGCATCTGCCAGGT TAGTTATGTTTTACCGTCCCCTCAGGGGTCAAGAATTGCTTTGAGAGT  
CCATCAAGTGATGACGAACTCCCTTGAAGCGACGCCTGAAATTTCCCCACTGCAGTCATCTTCTGCAC  
+



FFFFFFFFFFFFFFFFFFFFFFFFFFFFFFFFFFFFFFFFFFFFFFFFFFF:FFFFFFFFFFFFFFFF:FFFF,FFFFFF  
FFFFFFFF:FFFFFFFFFFFFFFFFFFFF:FFFFFFFFFFFFFFFFFFFFFFFFFFFFFFFFFFFF:FFFFFFFF:FFFFFFFF  
@A00155:342:HHGFNDSXY:1:1613:7274:16250 2:N:0:GAACCTAG+TCCGCATA  
GCTTAAGAGCATCTGCCAGGT TAGTTATGTTTTACCGTCCCCTCAGGGGTCAAGAATTGCTTTGAGAGT  
CCATCAAGTGATGACGAACTCCCTTGAAGCGACGCCTGAAATTTCCCCACTGCAGTCATCTTCTGCAC  
+



FFFFFFFFFFFFFFFFFFFFFFFFFFFFFFFFFFFFFFFFFFFFFFFFFFF:FFFFF:FFFFFFFFFFFFFFFF:F,FFFFFFFFFFFF  
FFF:FFF:FFFFFFFFFFFFFFFFFFFF::FFFFFFFFFFFFFFFFFFFFFFFFFFFFFFFFFFFFFFFFFFFF:F,FFFFFFFFFFFF  
@A00155:342:HHGFNDSXY:1:2639:10276:14121 2:N:0:GAACCTAG+TCCGCATA  
TTAAGAGCATCTGCCAGGT TAGTTATGTTTACCGTCCCCTCAGGGGTCAAGAATTGCTTTGAGAGTCC  
ATCAAGTGATGACGAACTCCCTTGAAGCGACGCCTGAAATTTCCCCACTGCAGTCATCTTCTGCACCG  
+



FFFFFFFFFFFFFFFFFFFFFFFFFFFFFFFFFFFFFFFFFFFFFFFFFFFFFFFFFFFFFFFFFFFFFFFFFFFFFFFFFFFFFFFFFFFF  
FFFFFFFFFFFFFFFFFFFFFFFFFFFFFFFFFFFFFFFFFFFFFFFFFFFFFFFFFFFFFFFFFFFFFFFFFFFFFFFFFFFFFFFFFFFF  
@A00155:342:HHGFNDSXY:1:2356:12391:27868 1:N:0:GAACCTAG+TCCGCATA  
TAAGAGCATCTGCCAGGT TAGTTATGTTTACCGTCCCCTCAGGGGTCAAGAATTGCTTTGAGGGTCCA  
TCAAGTGATGACGAACTCCCTTGAAGCGACGCCTGAAATTTCCCCACTGCAGTCATCTTCTGCACCG  
+



FFFFFFFFFFFFFFFFFFFFFFFFFFFFFFFFFFFFFFFFFFFFFFFFFFF:FFFFFFFFFFFFFFFFFFFFFFFFFFFFFFFFFF,  
FFFFFFFFFFFFFFFFFFFFFFFFFFFFFFFFFFFF:F:FFFFFFFFFFFF,FFFFFFFFFFFFFFFFFFFF:FFFFFFFF  
@A00155:342:HHGFNDSXY:1:1537:30544:11209 1:N:0:GAACCTAG+TCCGCATA  
AAGAGCATCTGCCAGGT TAGTTATGTTTACCGTCCCCTCAGGGGTCAAGAATTGCTTTGAGAGTCCAT  
CAAGTGATGACGAACTCCCTTGAAGCGACGCCTGAAATTTCCCCACTGCAGTCATCTTCTGCACCGAG


```

FFFFFFFFFFFFFFFFFFFF,FFFF,FFFF:FFFFFFFFFFFFFFFFFFFFFFFFFFFFFFFFFFFF  
FFFFFFFFFFFFFFFFFFFFFFFFFFFFFFFFFFFFFFFFFFFFFFFFFFFFFFFFFFFFFFFFFFFF  
@A00155:342:HHGFNDSXY:1:2216:19126:9095 1:N:0:GAACCTAG+TCCGCATA  
GAGCATCTGCCAGGTTAGTTATGTTTACCGTCCCCTCAGGGGTCAAGAATTGCTTTGAGAGTCCATCA  
AGTGATGACGAACTCCCTTGAAGCGACGCCTGAAATTTCCCCACTGCAGTCATCTTCTGCACCGAGAA  
+  
FFFFFFFFFFFFFFFF:FFFFFFFFFFFFFFFFFFFFFFFFFFFFFFFFFFFFFFFFFFFFFFFFFFFF  
FFFFFFFFFFFFFFFFFFFFFFFFFFFFFFFFFFFFFFFFFFFFFFFFFFFFFFFFFFFFFFFFFFFF  
@A00155:342:HHGFNDSXY:1:1370:19804:24987 1:N:0:GAACCTAG+TCCGCATA  
GAGCATCTGCCAGGTTAGTTATGTTTACCGTCCCCTCAGGGGTCAAGAATTGCTTTGAGAGTCCATCA  
AGTGATGACGAACTCCCTTGAAGCGACGCCTGAAATTTCCCCACTGCAGTCATCTTCTGCACCGAGAA  
+  
FFFF,FF:FFFFF:,F:FFFFFFFFFFFFFFFFFFFFFFFFFFFFFFFFFFFFFFFFFFFFFFFFFFFF  
FFFFFFFFFFFFFFFFFFFFFFFFFFFFFFFFFFFFFFFFFFFFFFFFFFFFFFFFFFFFFFFFFFFF  
@A00155:342:HHGFNDSXY:1:2650:30508:16658 2:N:0:GAACCTAG+TCCGCATA  
AGCATCTGCCAGGTTAGTTATGTTTACCGTCCCCTCAGGGGTCAAGAATTGCTTTGAGAGTCCATCAA  
GTGATGACGAACTCCCTTGAAGCGACGCCTGAAATTTCCCCACTGCAGTCATCTTCTGCACCGAGAAA  
+  
FFFF:FF:FFFFFFFFFFFFFF,F,:FFFFFFFFFFFFFFFFFFFFFFFFFFFFFFFFFFFFFFFFFFFF  
FFFFFFFFFFFF,FFFF:FFFFFFFFFFFFFFFFFFFFFFFFFFFFFFFFFFFFFFFFFFFFFFFFFFFF  
@A00155:342:HHGFNDSXY:1:1277:11858:15702 2:N:0:GAACCTAG+TCCGCATA  
AGCATCTGCCAGGTTAGTTATGTTTACCGTCCCCTCAGGGGTCAAGAATTGCTTTGAGAGTCCATCAA  
GTGATGACGAACTCCCTTGAAGCGACGCCTGAAATTTCCCCACTGCAGTCATCTTCTGCACCGAGAAA  
+  
FFFFFFFFFFFF:FFFFFFFFFFFFF:,FFFFFFFFFFFFFFFF:FFF::FFF:FFFF,FFFFFFFFFFFF  
:FFFFFF:FF:FFFFFFFFFFFFFFFFFFFFFFFFFFFFFFFF,FFFFF:F,,F:FFFFFFFF:FFFFFFFFFFFF  
@A00155:342:HHGFNDSXY:1:1420:10294:3850 2:N:0:GAACCTAG+TCCGCATA  
CATCTGCCAGGTTAGTTATGTTTACCGTCCCCTCAGGGGTCAAGAATTGCTTTGAGAGTCCATCAAGT  
GATGACGAACTCCCTTGAAGCGACGCCTGAAATTTCCCCACTGCAGTCATCTTCTGCACCGAGAAATA  
+  
FFFFFFFFFFFFFFFFFFFFFFFFFFFFFFFFFFFFFFFFFFFFFFFFFFFFFFFFFFFFFFFFFFFF  
FFFFFFFFFFFFFFFFFFFFFFFFFFFFFFFFFFFFFFFFFFFFFFFFFFFFFFFFFFFFFFFFFFFF  
@A00155:342:HHGFNDSXY:1:2144:23999:4633 1:N:0:GAACCTAG+TCCGCATA  
TCTGCCAGGTTAGTTATGTTTACCGTCCCCTCAGGGGTCAAGAATTGCTTTGAGAGTCCATCAAGTGA  
TGACGAACTCCCTTGAAGCGACGCCTGAAATTTCCCCACTGCAGTCATCTTCTGCACCGAGAAATAAT  
+  
FFFFFFFFFFFFFFFFFFFFFFFFFFFFFFFFFFFFFFFFFFFFFFFFFFFFFFFFFFFFFFFFFFFF  
FFFFFFFFFFFFFFFFFFFFFFFFFFFFFFFFFFFFFFFFFFFFFFFFFFFFFFFFFFFFFFFFFFFF  
@A00155:342:HHGFNDSXY:1:1556:7527:36417 1:N:0:GAACCTAG+TCCGCATA  
TCTGCCAGGTTAGTTATGTTTACAGTCCCCTCAGGGGTCAAGAATTGCTTTGAGAGTCCATCAAGTGA  
TGACGAACTCCCTTGAAGCGACGCCTGAAATTTCCCCACTGCAGTCATCTTCTGCACCGAGAAATAAT  
+  
FFFF:FFFF:,FFF,:FFFFFF,FFFFFF:FF,F:F,,FFFFFFFF:FF:F,F:FFFFFFFFFFFF  
FFFFFFFFFFFF:FFFFFFFFFFFF:FFFFFFFFFFFF,:FFFFFFFFFFFFFFFFFFFF:FFFFFFFFFFFF  
@A00155:342:HHGFNDSXY:1:1436:22535:6073 1:N:0:GAACCTAG+TCCGCATA  
TCTGCCAGGTTAGTTATGTTTACCGTCCCCTCAGGGGTCAAGAATTGCTTTGAGAGTCCATCAAGTGA  
TGACGAACTCCCTTGAAGCGACGCCTGAAATTTCCCCACTGCAGTCATCTTCTGCACCGAGAAATAAT  
+  
FFFFFFFFFFFFFFFF:FFFFFFFFFFFFFFFFFFFFFFFFFFFFFFFFFFFFFFFFFFFFFFFFFFFF  
FFFFFFFFFFFFFFFFFFFFFFFFFFFFFFFFFFFFFFFFFFFFFFFFFFFFFFFFFFFFFFFFFFFF  
@A00155:342:HHGFNDSXY:1:2461:10890:17660 2:N:0:GAACCTAG+TCCGCATA  
CTGCCAGGTTAGTTATGTGTACCGTCCCCTCAGGGGTCAAGAATTGCTTTGAGAGTCCATCAAGTGAT  
GACGAACTCCCTTGAAGCGACGCCTGAAATTTCCCCACTGCAGTCATCTTCTGCACCGAGAAATAATT  
+

FFFFFFFFFFFFFFFF:F,,FFFFFFFFFFFFFFFFFFFFFFFF:FF::FFFF:FFFFFFFFFFFF  
FFFFFFFFFFFF,FFFFFFFFFFFFFFFFFFFFFFFF:FFFF:FF:FFFFFFFFFFFFFFFFFFFF  
@A00155:342:HHGFNDSXY:1:2661:3739:22623 2:N:0:GAACCTAG+TCCGCATA  
TGCCAGGTTAGTTATGTTTACCGTCCCCTCAGGGGTCAAGAATTGCTTTGAGAGTCCATCAAGTGATG  
ACGAACTCCCTTGAAGCGACGCCTGAAATTTCCCCACTGCAGTCATCTTCTGCACCGAGAAATAATT  
+  
:FFFF,FFFFFFFF,:FFFF:F,F::FF:,,:FF:F,FF:F,FFFF:F:F:FFFF:FFFFFFFF  
FFFFFFFF:F:FFF:FF::F,:FFFFFFFF,,F:F:FFFFFFFFFFF:FFF,FFFFFFFF  
@A00155:342:HHGFNDSXY:1:1423:21350:18677 2:N:0:GAACCTAG+TCCGCATA  
CCAGGTTAGTTATGTTTACCGTCCCCTCAGGGGTCAAGAATTGCTTTGAGAGTCCATCAAGTGATGAC  
GAACTCCCTTGAAGCGACGCCTGAAATTTCCCCACTGCAGTCATCTTCTGCACCGAGAAATAATTCCT  
+  
FFFFFFFFFFFFFFFFFFFFFFFFFFFFFFFFFFFFFFFF:FFFFFFFF:FFFFFFFFFFFFFFFF  
FFFFFFFFFFFFFFFFFFFFFFFFFFFFFFFFFFFFFFFFFFFFFFFFFFFFFFFFFFFFFFFFFFFF  
@A00155:342:HHGFNDSXY:1:1440:13196:11851 2:N:0:GAACCTAG+TCCGCATA  
GGTTAGTTATGTTTACCGTCCCCTCAGGGGTCAAGAATTGCTTTGAGAGTCCATCAAGTGATGACGAA  
CTCCCTTGAAGCGACGCCTGAAATTTCCCCACTGCAGTCATCTTCTGCACCGAGAAATAATTCCTAGT  
+  
FFFFFFFFFFFFFFFFFFFFFFFF:FFFF:F:,FFF,FFF,F,F:FF,FFFF,:FFFF,F:FFFF  
FFFF,:FFFFFFFFFFF:FFFF::FFF:FFF,FFF,F:,FFFFFFFFFFFFFFFFFFF:FFF:FF:  
@A00155:342:HHGFNDSXY:1:1518:23068:35493 2:N:0:GAACCTAG+TCCGCATA  
GGTTAGTTATGTTTACCGTCCCCTCAGGGGTCAAGAATTGCTTTGAGAGTCCATCAAGTGATGACGAA  
CTCCCTTGAAGCGACGCCTGAAATTTCCCCACTGCAGTCATCTTCTGCACCGAGAAATAATTCCTAGT  
+  
FFFFFFFFFFFFFFFFFFFFFFFF:FFFFFFFFFFFFFFFFFFFFFFFFFFFFFFFFFFFFFFFFFFFF  
FFFFFFFFFFFFFFFFFFFFFFFFFFFFFFFFFFFFFFFFFFFFFFFFFFFFFFFFFFFFFFFFFFFF  
@A00155:342:HHGFNDSXY:1:1529:21269:31407 2:N:0:GAACCTAG+TCCGCATA  
GGTTAGTTATGTTTACCGTCCCCTCAGGGGTCAAGAATTGCTTTGAGAGTCCATCAAGTGATGACGAA  
CTCCCTTGAAGCGACGCCTGAAATTTCCCCACTGCAGTCATCTTCTGCACCGAGAAATAATTCCTAGT  
+  
FFFFFFFFFFFFFFFFFFFFFFFFFFFFFFFF:FFFFFFFFFFFFFFFF,FFFFFFFFFFFFFFFFFFFF  
FFFFFFFFFFFFFFFFFFFFFFFFFFFFFFFFFFFFFFFFFFFFFFFFFFFFFFFFFFFFFFFFFFFF:  
@A00155:342:HHGFNDSXY:1:2547:30843:24533 2:N:0:GAACCTAG+TCCGCATA  
GTTAGTTATGTTTACCGTCCCCTCAGGGGTCAAGAATTGCTTTGAGAGTCCATCAAGTGATGACGAAC  
TCCCATGAAGCGACGCCTGAAATTTCCCCACTGCAGTCATCTTCTGCACCGAGAAATAATTCCTAGTC  
+  
FFFFFFFFFFFF,FFFFFFFF:F:FFFFFFFF:F,F:FFFF,FFFFFFFFFFFF:FFFFFF:FFF,F  
FFFF,FFF,FFFFFFFFFFFF:FFFFFFFFFFFF::FFFF:FFFFFFFF:FFFFFFFF,FFF  
@A00155:342:HHGFNDSXY:1:2144:23999:4633 2:N:0:GAACCTAG+TCCGCATA  
GTTAGTTATGTTTACCGTCCCCTCAGGGGTCAAGAATTGCTTTGAGAGTCCATCAAGTGATGACGAAC  
TCCCTTGAAGCGACGCCTGAAATTTCCCCACTGCAGTCATCTTCTGCACCGAGAAATAATTCCTAGTC  
+  
FFFFFFFFFFFF,FFFFFFFFFFFFFFFFFFFFFFFF:FFFF,FFFFFFFFFFFFFFFFFFFFFFFF  
FFFFFFFFFFFFFFFFFFFFFFFFFFFFFFFF:FFFF:F:FF:FFFFFFFFFFFFFFFFFFFF  
@A00155:342:HHGFNDSXY:1:1551:13765:25019 2:N:0:GAACCTAG+TCCGCATA  
GTTAGTTATGTTTACCGTCCCCTCAGGGGTCAAGAATTGCTTTGAGAGTCCATCAAGTGATGACGAAC  
TCCCTTGAAGCGACGCCTGAAATTTCCCCACTGCAGTCATCTTCTGCACCGAGAAATAATTCCTAGTC  
+  
:FFF:FFFF,F,FFFFFFFFFFFF,FFFFFFFFFFFF:FF,FFFFFFFFFFFF:FFF:FFFFFFFF  
FFFF::FFFFFFFFFFFF,FFF:FFFFFFFF:FFF:F,:FFF:FFFFFFFFFFFFFFFFFFFF  
@A00155:342:HHGFNDSXY:1:1141:16712:28776 2:N:0:GAACCTAG+TCCGCATA  
GTTAGTTATGTTTACCGTCCCCTCAGGGGTCAAGAATTGCTTTGAGAGTCCATCAAGTGATGACGAAC  
TCCCTTGAAGCGACGCCTGAAATTTCCCCACTGCAGTCATCTTCTGCACCGAGAAATAATTCCTAGTC  
+

F:FFFF::,F:F,FFFF:FFFFFF,F:FF:FFFFFFFF:FF:F:FFFFFFFFFFFFFFFFFFFF:FFFF  
FFFF,,FF:FFFFFFFFFFFF::,FFFFFFFF:FFFFFFFFFFFFFFFFFFFFFFFFFFFFFFFF:FFF  
@A00155:342:HHGFNDSXY:1:1644:23592:24596 1:N:0:GAACCTAG+TCCGCATA  
TTAGTTATGTTTACCGTCCCCTCAGGGGTCAAGAATTGCTTTGAGAGTCCATCAAGTGATGACGAACT  
CCCTTGAAGCGACGCCTGAAATTTCCCCACTGCAGTCATCTTCTGCACCGAGAAATAATTC  
+  
FFFF:FF:FFFFFFFFFFFFFFFFFFFF:F:FFFFFFFFFFFFFFFFFFFF:FFFFFFFFFFFFFFFFFFFF  
FFFFFFFFFFFFFFFFFFFFFFFFFFFF,FFFFFFFFFFFFFFFFFFFFFFFFFFFFFFFFFFFFFFFF  
@A00155:342:HHGFNDSXY:1:2535:18801:26005 1:N:0:GAACCTAG+TCCGCATA  
TTAGTTATGTTTACCGTCCCCTCAGGGGTCAAGAATTGCTTTGAGAGTCCATCAAGTGATGACGAACT  
CCCTTGAAGCGACGCCTGAAATTTCCCCACTGCAGTCATCTTCTGCACCGAGAAATAATTC  
+  
FFFFFF:FFFFFFFFFFFFFFFFFFFFFFFFFFFFFFFFFFFFFFFFFFFFFFFFFFFFFFFFFFFFF  
FFFFFFFFFFFFFFFFFFFFFFFFFFFFFFFFFFFFFFFFFFFFFFFFFFFFFFFFFFFFFFFFFFFF  
@A00155:342:HHGFNDSXY:1:2535:16495:18067 1:N:0:GAACCTAG+TCCGCATA  
TTAGTTATGTTTACCGTCCCCTCAGGGGTCAAGAATTGCTTTGAGAGTCCATCAAGTGATGACGAACT  
CCCTTGAAGCGACGCCTGAAATTTCCCCACTGCAGTCATCTTCTGCACCGAGAAATAATTC  
+  
F:FFFFFFFFFFFFFFFFFFFFFFFFFFFF:FFFFFFFFFFFFFFFFFFFFFFFFFFFFFFFFFFFFF  
FFFFFFFFFFFFFFFFFFFFFFFFFFFFFFFFFFFFFFFFFFFFFFFFFFFFFFFFFFFFFFFFFFFF  
@A00155:342:HHGFNDSXY:1:1158:21992:9737 2:N:0:GAACCTAG+TCCGCATA  
TAGTTATGTTTACCGTCCCCTCAGGGGTCAAGAATTGCTTTGAGAGTCCATCAAGTGATGACGAACTC  
CCTTGAAGCGACGCCTGAAATTTCCCCACTGCAGTCATCTTCTGCACCGAGAAATAATTCCTAGTCGT  
+  
FFFFFFFFFFFFFFFFFFFFFFFFFFFFFFFFFFFF:FFFFFFFFFFFFFFFFFFFF:F:FFFFFFFFFFFF  
FF:FFFFFFFFFFFFFFFFFFFF:FFFF:FF,FFF,F:FFFFFFFFFFFFFFFFFFFFFFFFFFFFF  
@A00155:342:HHGFNDSXY:1:1158:21486:8077 2:N:0:GAACCTAG+TCCGCATA  
TAGTTATGTTTACCGTCCCCTCAGGGGTCAAGAATTGCTTTGAGAGTCCATCAAGTGATGACGAACTC  
CCTTGAAGCGACGCCTGAAATTTCCCCACTGCAGTCATCTTCTGCACCGAGAAATAATTCCTAGTCGT  
+  
FFFF,FFFF:FFFF:FFFF,F:FFF:FFFFFFFFFFFF:F:FFFFFFFFF,:F:,FFF,FFFFFFFF  
FF::FF:FFFFFFFFFFFF:FFFFFFFFFFFF:FFF:F:FFF:F:FFFFFFFF:FFFFF,FFFFFFFF  
@A00155:342:HHGFNDSXY:1:2448:30680:21057 2:N:0:GAACCTAG+TCCGCATA  
TAGTTATGTTTACCGTCCCCTCAGGGGTCAAGAATTGCTTTGAGAGTCCATCAAGTGATGACGAACTC  
CCTTGAAGCGACGCCTGAAATTTCCCCACTGCAGTCATCTTCTGCACCGAGAAATAATTCCTAGTCGT  
+  
FFFFF,FFFFFFFFFFFFFFFFFFFFFFFFFFFF,FFF,FFF,FFFFFFFFFFFF:FFFF:FFFFFFFF  
:F:FFFFFFFFFFFFFFFFFFFFFFFFFFFF:FFFFFFFFF:FFFFFFFFFFFF:F,FFFFFFFFFFFF:FFF  
@A00155:342:HHGFNDSXY:1:2657:13485:12383 2:N:0:GAACCTAG+TCCGCATA  
AGTTATGTTTACCGTCCCCTCAGGGGTCAAGAATTGCTTTGAGAGTCCATCAAGTGATGACGAACTCC  
CTTGAAGCGACGCCTGAAATTTCCCCACTGCAGTCATCTTCTGCACCGAGAAATAATTCCTAGTCGTG  
+  
FFFFF,FFFFFFFFFFFFF:FFFFFFFFFFFFF,FFFFF:FFFFFFFFFFFF::FFFFFFFFFFFFFFFF  
F,,FFFFFFFFFFFFFFFFFFFF:FFFFFFFFFFFFFFFFFFFFFFFFFFFFFFFFFFFFFFFFFFFFF  
@A00155:342:HHGFNDSXY:1:2657:13485:12383 1:N:0:GAACCTAG+TCCGCATA  
GTTATGTTTACCGTCCCCTCAGGGGTCAAGAATTGCTTTGAGAGTCCATCAAGTGATGACGAACTCCC  
TTGAAGCGACGCCTGAAATTTCCCCACTGCAGTCATCTTCTGCACCGAGAAATAATTCCTAGTCGTG  
+  
FFFFFFFFFFFFFFFFFFFFFFFFFFFFFFFFFFFF:FFFFFFFFFFFFFFFFFFFFFFFFFFFF:FFFF  
FFFFFFFFFFFFFFFFFFFFFFFFFFFFFFFFFFFFFFFFFFFFFFFFFFFFFFFFFFFFFFFFFFFFF  
@A00155:342:HHGFNDSXY:1:1622:3658:12493 2:N:0:GAACCTAG+TCCGCATA  
GTTATGTTTACCGTCCCCTCAGGGGTCAAGAATTGCTTTGAGAGTCCATCAAGTGATGACGAACTCCC  
TTGAAGCGACGCCTGAAATTTCCCCACTGCAGTCATCTTCTGCACCGAGAAATAATTCCTAGTCGTG  
+

FFFFFFFFFFFFFF,FF:F:F::FFFFFFFFF:F:,F:F:FFFFFFFF:FFFF:F::FFFF:FFFF:F  
F:FF::FF::FFF:FFFFFFFFFFFFFFFFF:,F:FFFFFFFFFFFFFF:FFFFFFFFFFFFFFFFFFFFF  
@A00155:342:HHGFNDSXY:1:2147:18521:23766 1:N:0:GAACCTAG+TCCGCATA  
TGTTTACCGTCCCCTCAGGGGTCAAGAATTGCTTTGAGAGTCCATCAAGTGATGACGAACTCCCTTGA  
AGCGACGCCTGAAATTTCCCCACTGCAGTCATCTTCTGCACCGAGAAATAATTCCTAGTCGTGGTGAT  
+  
FFFFFFFFFFFFFFFFFFFFFFFFFFFFFFFFFFFFFFFFFFFFFFFFFFFFFFFFFFFFFFFFFFFFFFFFF  
FFFFFFFFFFFFFFFFFFFFFFFFFFFFFFFFFFFFFFFFFFFFFFFFFFFFFFFFFFFFFFFFFFFFFFFFF  
@A00155:342:HHGFNDSXY:1:1165:15519:29277 2:N:0:GAACCTAG+TCCGCATA  
TGTTTACCGTCCCCTCAGGGGTCAAGAATTGCTTTGAGAGTCCATCAAGTGATGACGAACTCCCTTGA  
AGCGACGCCTGAAATTTCCCCACTGCAGTCATCTTCTGCACCGAGAAATAATTCCTAGTCGTGGTGAT  
+  
FF:,FFFF:FFFF,FF:F::FFFF:FFFFF,:FFFFFFFFFFFFFFFF:FF:FFFFFFFFFF:FF:  
FFFFFFFFF:FFFFFFFFFFFFFFFF:FFF:,FFFF:FFFFFFFFFFFFFFFFFFFFFFFFFFFFFFFFF  
@A00155:342:HHGFNDSXY:1:2431:6542:9502 2:N:0:GAACCTAG+TCCGCATA  
GTTTACCGTCCCCTCAGGGGTCAAGAATTGCTTTGAGAGTCCATCAAGTGATGACGAACTCCCTTGA  
GCGACGCCTGAAATTTCCCCACTGCAGTCATCTTCTGCACCGAGAAATAATTCCTAGTC  
+  
FFFFFFFFFFFFFFFF:FFFFFFFFFFFFFFFF:FFFFFFFFFF:FF:F:FFFFFFFFFFFFFFFF:FFF  
FFFFFFFFFFFFFFFFFFFFF,F,,FFFFFF:FFFFFFFFFFFFFFFFFFFFFFFFFFFFFFFFF  
@A00155:342:HHGFNDSXY:1:2123:19036:2268 1:N:0:GAACCTAG+TCCGCATA  
GTTTACCGTCCCCTCAGGGGTCAAGAATTGCTTTGAGAGTCCATCAAGTGATGACGAACTCCCTTGA  
GCGACGCCTGAAATTTCCCCACTGCAGTCATCTTCTGCACCGAGAAATAATTCCTAGTCGTGGTGATA  
+  
FFFFFFFFF,FF:FFFFFFFFFFFFFFFFFFFFFFFFFFFFFFFFFFFFFFFFFFFFFFFFFFFFFFFFF  
FFFFFFFFFFFFFFFFFFFFFFFFFFFFFFFFFFFFFFFFFFFFFFFFFFFFFFFFFFFFFFFFFFFFFFFFF  
@A00155:342:HHGFNDSXY:1:1413:11360:4194 1:N:0:GAACCTAG+TCCGCATA  
GTTTACCGTCCCCTCAGGGGTCAAGAATTGCTTTGAGAGTCCATCAAGTGATGACGAACTCCCTTGA  
GCGACGCCTGAAATTTCCCCACTGCAGTCATCTTCTGCACCGAGAAATAATTCCTAGTCGTGGTGATA  
+  
FFFFFFFFFFFFFFFFFFFFFFFFFFFFFFFFFFFFFFFFFFFFFFFFFFFFFFFFFFFFFFFFFFFFFFFFF  
FFFFFFFFFFFFFFFFFFFFFFFFFFFFFFFFFFFFFFFFFFFFFFFFFFFFFFFFFFFFFFFFFFFFFFFFF  
@A00155:342:HHGFNDSXY:1:2476:18403:26287 2:N:0:GAACCTAG+TCCGCATA  
GTTTACCGTCCCCTCAGGGGTCAAGAATTGCTTTGAGAGTCCATCAAGTGATGACGAACTCCCTTGA  
GCGACGCCTGAAATTTCCCCACTGCAGTCATCTTCTGCACCGAGAAATAATTCCTAGTCGTGGTGATA  
+  
FFFFFFFFFFFFFFFFFFFF,FFFF:FFFFFFFFFFFFFFFFFFFFFFFFFFFFFFFFFFFFFFFFFFFFF,:FFF  
FFFFFFFFF:FFF:F,FFFFFFFFFFFFFFFFFFFFFFFFFFFFFFFFFFFFFFFFFFFFFFFFFFFFFFFFF  
@A00155:342:HHGFNDSXY:1:2509:25672:20024 1:N:0:GAACCTAG+TCCGCATA  
GTTTACCGTCCCCTCAGGGGTCAAGAATTGCTTTGAGAGTCCATCAAGTGATGACGAACTCCCTTGA  
GCGACGCCTGAAATTTCCCCACTGCAGTCATCTTCTGCACCGAGAAATAATTCCTAGTCGTGGTGATA  
+  
FF:FFFFFFFFFFFFFFFFFFFFFFFFFFFFFFFFFFFFFFFFFFFFFFFFFFFFFFFFFFFFFFFFFFFFF  
FFFFFFFFFFFFFFFFFFFFFFFFFFFFFFFFFFFFFFFFFFFFFFFFFFFFFFFFFFFFFFFFFFFFFFFFF  
@A00155:342:HHGFNDSXY:1:1113:28131:27821 2:N:0:GAACCTAG+TCCGCATA  
GTTTACCGTCCCCTCAGGGGTCAAGAATTGCTTTGAGAGTCCATCAAGTGATGACGAACTCCCTTGA  
GCGACGCCTGAAATTTCCCCACTGCAGTCATCTTCTGCACCGAGAAATAATTCCTAGTCGTGGTGATA  
+  
FFFFFFFFFFFFFFF,FFFFF:FFFFFFFFFFF,FFFFFFFFFFF:FFFFFFFFFFFFFFFFFFFFFFFFF:FFF  
FFFFFFFFFFFFFFFFFFFFFFFFF,FFFFF:FFF,FFF::FFFFFFFFFFFFFFFFFFFFFFFFFFFFFFFFF  
@A00155:342:HHGFNDSXY:1:1278:32054:36464 1:N:0:GAACCTAG+TCCGCATA  
GTTTACCGTCCCCTCAGGGGTCAAGAATTGCTTTGAGAGTCCATCAAGTGATGACGAACTCCCTTGA  
GCGACGCCTGAAATTTCCCCACTGCAGTCATCTTCTGCACCGAGAAATAATTCCTAGTCGTGGTGATA  
+

FFFFFFFFFFFFFFFFFFFFFFFFFFFFFFFFFFFFFFFFFFFFFFFFFFFFFFFFFFFFFFFFFFFFFFFFFFFFFFFF  
FFFFFFFFFFFFFFFFFFFFFFFFFFFFFFFFFFFFFFFFFFFFFFFFFFFFFFFFFFFFFFFFFFFFFFFFFFFFFFFF  
@A00155:342:HHGFNDSXY:1:2614:6271:30452 1:N:0:GAACCTAG+TCCGCATA  
GTTTACCGTCCCCTCAGGGGTCAAGAATTGCTTTGAGAGTCCATCAAGTGATGACGAACCTCCCTTGAAG  
CGACGCCTGAAATTTCCCCACTGCAGTCATCTTCTGCACCGAGAAATAATTCCTAGTCGTGGTGATA  
+  
FFFFFFFFFFFFFFFFFFFFFFFFFFFFFFFFFFFFFFFFFFFFFFFFFFFFFFFFFFFFFFFFFFFFFFFFFFFFFFFF  
:FFFFFFFFFFFFFFFFFFFFFFFFFFFFFFFFFFFFFFFFFFFFFFFFFFFFFFFFFFFFFFFFFFFFFFFFFFFFFFFF  
@A00155:342:HHGFNDSXY:1:2418:6822:33411 1:N:0:GAACCTAG+TCCGCATA  
TTTACCGTCCCCTCAGGGGTCAAGAATTGCTTTGAGAGTCCATCAAGTGATGACGAACCTCCCTTGAAG  
CGACGCCTGAAATTTCCCCACTGCAGTCATCTTCTGCACCGAGAAATAATTCATAGTCGTGGTGATAT  
+  
FFFFFFFFFFFFFFFFFFFFFFFFFFFFFFFFFFFFFFFFFFFFFFFFFFFFFFFFFFFFFFFFFFFFFFFFFFFFFFFF,FFFFFFFFFFFFFFFF:FF  
FFFFFFFFFFFFFFFFFFFFFFFFFFFFFFFFFFFFFFFFFFFFFFFFFFFFFFFFFFFFFFFFFFFFFFFFFFFFFFFF,F::F:FFFFFFFFFFFF  
@A00155:342:HHGFNDSXY:1:2415:32868:22153 1:N:0:GAACCTAG+TCCGCATA  
TTTACCGTCCCCTCAGGGGTCAAGAATTGCTTTGAGAGTCCATCAAGTGATGACGAACCTCCCTTGAAG  
CGACGCCTGAAATTTCCCCACTGCAGTCATCTTCTGCACCGAGAAATAATTCCTAGTCGTGGTGATAT  
+  
FFFFFFFFFFFFFFFFFFFFFFFFFFFFFFFFFFFFFFFFFFFFFFFFFFFFFFFFFFFFFFFFFFFFFFFFFFFFFFFF  
FFFFFFFFFFFFFFFFFFFFFFFFFFFFFFFFFFFFFFFFFFFFFFFFFFFFFFFFFFFFFFFFFFFFFFFFFFFFFFFF  
@A00155:342:HHGFNDSXY:1:1440:13196:11851 1:N:0:GAACCTAG+TCCGCATA  
TTTACCGTCCCCTCAGGGGTCAAGAATTGCTTTGAGAGTCCATCAAGTGATGACGAACCTCCCTTGAAG  
CGACGCCTGAAATTTCCCCACTGCAGTCATCTTCTGCACCGAGAAATAATTCCTAGTCGTGGTGATAT  
+  
FFFFFFF:FFFFFFFFFFFFFFFFFFFFFFFFFFFFFFFFFFFFFFFFFFFFFFFFFFFFFFFFFFFFFFFFFFFFFFFF:F  
FFFFFFFFFFFFFFFFFFFFFFFFFFFFFFFFFFFFFFFFFFFFFFFFFFFFFFFFFFFFFFFFFFFFFFFFFFFFFFFF:FFFFFFFFFFFFF  
@A00155:342:HHGFNDSXY:1:2204:31159:17816 1:N:0:GAACCTAG+TCCGCATA  
TTTACCGTCCCCTCAGGGGTCAAGAATTGCTTTGAGAGTCCATCAAGTGATGACGAACCTCCCTTGAAG  
CGACGCCTGAAATTTCCCCACTGCAGTCATCTTCTGCACCGAGAAATAATTCCTAGTCGTGGTGATAT  
+  
FFFFFFFFFFFFFFFFFFFFFFFFFFFFFFFFFFFFFFFFFFFFFFFFFFFFFFFFFFFFFFFFFFFFFFFFFFFFFFFF  
FFFFFFFFFFFFFFFFFFFFFFFFFFFFFFFFFFFFFFFFFFFFFFFFFFFFFFFFFFFFFFFFFFFFFFFFFFFFFFFF:FF:FFFFFFFF:F  
@A00155:342:HHGFNDSXY:1:2476:18403:26287 1:N:0:GAACCTAG+TCCGCATA  
TTTACCGTCCCCTCAGGGGTCAAGAATTGCTTTGAGAGTCCATCAAGTGATGACGAACCTCCCTTGAAG  
CGACGCCTGAAATTTCCCCACTGCAGTCATCTTCTGCACCGAGAAATAATTCCTAGTCGTGGTGATAT  
+  
FFFFFFFFFFFFFFFFFFFFFFFFFFFFFFFFFFFFFFFFFFFFFFFFFFFFFFFFFFFFFFFFFFFFFFFFFFFFFFFF  
FFFFFFFFFFFFFFFFFFFFFFFFFFFFFFFFFFFFFFFFFFFFFFFFFFFFFFFFFFFFFFFFFFFFFFFFFFFFFFFF  
@A00155:342:HHGFNDSXY:1:2510:12382:10786 1:N:0:GAACCTAG+TCCGCATA  
TTTACCGTCCCCTCAGGGGTCAAGAATTGCTTTGAGAGTCCATCAAGTGATGACGAACCTCCCTTGAAG  
CGACGCCTGAAATTTCCCCACTGCAGTCATCTTCTGCACCGAGAAATAATTCCTAGTCGTGGTGATAT  
+  
FFFFFFFFFFFFFFFFFFFFFFFFFFFFFFFFFFFFFFFFFFFFFFFFFFFFFFFFFFFFFFFFFFFFFFFFFFFFFFFF  
FFFFFFFFFFFFFFFFFFFFFFFFFFFFFFFFFFFFFFFFFFFFFFFFFFFFFFFFFFFFFFFFFFFFFFFFFFFFFFFF  
@A00155:342:HHGFNDSXY:1:1609:7997:25238 1:N:0:GAACCTAG+TCCGCATA  
TTTACCGTCCCCTCAGGGGTCAAGAATTGCTTTGAGAGTCCATCAAGTGATGACGAACCTCCCTTGAAG  
CGACGCCTGAAATTTCCCCACTGCAGTCATCTTCTGCACCGAGAAATAATTCCTAGTCGTGGTGATAT  
+  
FFFFFFFFFFFFFFFFFFFFFFFFFFFFFFFFFFFFFFFFFFFFFFFFFFFFFFFFFFFFFFFFFFFFFFFFFFFFFFFF,FFFFFFFFFFFFFFFFFFFFFFFFFFFFFFFFFFFFFFFFFFFFFFFFFFFFFFFFFFFFFFFFFFFFFFFF:FF  
FFFFFFFFFFFFFFFFFFFFFFFFFFFFFFFFFFFFFFFFFFFFFFFFFFFFFFFFFFFFFFFFFFFFFFFFFFFFFFFF:FFFFFFFFFFFFFFFFFFFFFFFFFFFFFFFFFFFFFFFFFFFFFFFFFFFFFFFFFFFFFFFFFFFFFFFF  
@A00155:342:HHGFNDSXY:1:1131:16306:3239 1:N:0:GAACCTAG+TCCGCATA  
TTTACCGTCCCCTCAGGGGTCAAGAATTGCTTTGAGAGTCCATCAAGTGATGACGAACCTCCCTTGAAG  
CGACGCCTGAAATTTCCCCACTGCAGTCATCTTCTGCACCGAGAAATAATTCCTAGTCGTGGTGATAT  
+

FFFFFFFFFFFFFFFFFFFFFFFFFFFFFFFFFFFFFFFFFFFFFFFFFFFFFFFFFFFFFFFFFFFFFFFF  
FFFFFFFFFFFFFFFFFFFFFFFFFFFFFFFFFFFFFFFFFFFFFFFFFFFFFFFFFFFFFFFFFFFFFFFF  
@A00155:342:HHGFNDSXY:1:1461:30138:36025 1:N:0:GAACCTAG+TCCGCATA  
TTTACCGTCCCCTCAGGGGTCAAGAATTGCTTTGAGAGTCCATCAAGTGATGACGAACTCCCTTGAAG  
CGACGCCTGAAATTTCCCCACTGCAGTCATCTTCTGCACCGAGAAATAATTCCTAGTCGTGGTGATAT  
+  
FFF:FFFFFFFFFFFFFFFFFFFFFFFFFFFFFFFFFFFFFFFFFFFFFFFFFFFFFFFFFFFFFFFFFFFF  
FFFFFFFFFFFFFFFFFFFFFFFFFFFFFFFFFFFFFFFFFFFFFFFFFFFFFFFFFFFFFFFFFFFFFFFF  
@A00155:342:HHGFNDSXY:1:1551:13765:25019 1:N:0:GAACCTAG+TCCGCATA  
TTTACCGTCCCCTCAGGGGTCAAGAATTGCTTTGAGAGTCCATCAAGTGATGACGAACTCCCTTGAAG  
CGACGCCTGAAATTTCCCCACTGCAGTCATCTTCTGCACCGAGAAATAATTCCTAGTCGTGGTGATAT  
+  
FFFFFFFFFFFFFFFFFFFFFFFFFFFFFFFFFFFFFFFFFFFFFFFFFFFFFFFFFFFFFFFFFFFFFFFF  
FFFFFFFFFFFFFFFFFFFF:FFFFFFFFFFFFFFFFFFFFFFFFFFFFFFFFFFFFFFFFFFFFFFFFFFFF  
@A00155:342:HHGFNDSXY:1:1458:32253:11287 1:N:0:GAACCTAG+TCCGCATA  
TTTACCGTCCCCTCAGGGGTCAAGAATTGCTTTGAGAGTCCATCAAGTGATGACGAACTCCCTTGAAG  
CGACGCCTGAAATTTCCCCACTGCAGTCATCTTCTGCACCGAGAAATAATTCCTAGTCGTGGTGATAT  
+  
FFFFFFFFFFFFFFFFFFFFFFFFFFFFFFFFFFFFFFFFFFFFFFFFFFFFFFFFFFFFFFFFFFFFFFFF  
FFFFFFFFFFFFFFFFFFFFFFFFFFFFFFFFFFFFFFFFFFFFFFFFFFFFFFFFFFFFFFFFFFFFFFFF,FFFF  
@A00155:342:HHGFNDSXY:1:1237:5367:14512 1:N:0:GAACCTAG+TCCGCATA  
TTTACCGTCCCCTCAGGGGTCAAGAATTGCTTTGAGAGTCCATCAAGTGATGACGAACTCCCTTGAAG  
CGACGCCTGAAATTTCCCCACTGCAGTCATCTTCTGCACCGAGAAATAATTCCTAGTCGTGGTGATAT  
+  
FFFFFFFFFFFFFFFFFFFFFFFFFFFFFFFFFFFFFFFFFFFFFFFFFFFFFFFFFFFFFFFFFFFFFFFF  
FFFFFFFFFFFFFFFFFFFFFFFFFFFFFFFFFFFFFFFFFFFFFFFFFFFFFFFFFFFFFFFFFFFFFFFF:FFFFF  
@A00155:342:HHGFNDSXY:1:1529:21269:31407 1:N:0:GAACCTAG+TCCGCATA  
TTTACCGTCCCCTCAGGGGTCAAGAATTGCTTTGAGAGTCCATCAAGTGATGACGAACTCCCTTGAAG  
CGACGCCTGAAATTTCCCCACTGCAGTCATCTTCTGCACCGAGAAATAATTCCTAGTCGTGGTGATAT  
+  
FFFFFFFFFFFFFFFFFFFFFFFFFFFFFFFFFFFFFFFFFFFFFFFFFFFFFFFFFFFFFFFFFFFFFFFF  
FFFFFFFFFFFFFFFFFFFF:FFFFFFFFFFFFFFFFFFFFFFFFFFFFFFFFFFFFFFFFFFFFFFFFFFFF  
@A00155:342:HHGFNDSXY:1:1234:21169:6245 1:N:0:GAACCTAG+TCCGCATA  
TTTACCGTCCCCTCAGGGGTCAAGAATTGCTTTGAGAGTCCATCAAGTGATGACGAACTCCCTTGAAG  
CGACGCCTGAAATTTCCCCACTGCAGTCATCTTCTGCACCGAGAAATAATTCCTAGTCGTGGTGATAT  
+  
FFFFFFFFFFFFFFFFFFFFFFFFFFFFFFFFFFFFFFFFFFFFFFFFFFFFFFFFFFFFFFFFFFFFFFFF  
FFFFFFFFFFFFFFFFFFFFFFFFFFFFFFFFFFFFFFFFFFFFFFFFFFFFFFFFFFFFFFFFFFFFFFFF:F  
@A00155:342:HHGFNDSXY:1:2263:31060:24940 1:N:0:GAACCTAG+TCCGCATA  
TTACCGTCCCCTCAGGGGTCAAGAATTGCTTTGAGAGTCCATCAAGTGATGACGAACTCCCTTGAAGC  
GACGCCTGAAATTTCCCCACTGCAGTCATCTTCTGCACCGAGAAATAATTCCTAGTCGTGGTGATATT  
+  
FFFFFFFFFFFFFFFFFFFFFFFFFFFFFFFFFFFFFFFFFFFFFFFFFFFFFFFFFFFFFFFFFFFFFFFF  
FFFFFFFFFFFFFFFFFFFFFFFFFFFFFFFFFFFFFFFFFFFFFFFFFFFFFFFFFFFFFFFFFFFFFFFF,FFFF:FFFFFFFFFFFFFFFF:FFFFFFFFFFFF  
@A00155:342:HHGFNDSXY:1:1131:16306:3239 2:N:0:GAACCTAG+TCCGCATA  
TTACCGTCCCCTCAGGGGTCAAGAATTGCTTTGAGAGTCCATCAAGTGATGACGAACTCCCTTGAAGC  
GACGCCTGAAATTTCCCCACTGCAGTCATCTTCTGCACCGAGAAATAATTCCTAGTCGTGGTGATATT  
+  
FF:FFFFFFFFFFFFFFFF,FFFFFFFFF:F:FFFFFFFFFFFF:FFFF:FFFFFFFFFFFF:FFFFFF  
FFFFFFFFFFFFFFFFFFFF:FF:FFFF:FFFFFFFFFFFFFFFFFFFFFFFFFFFFFFFFFFFFFFFFFFFF  
@A00155:342:HHGFNDSXY:1:1542:2465:29465 1:N:0:GAACCTAG+TCCGCATA  
TTACCGTCCCCTCAGGGGTCAAGAATTGCTTTGAGAGTCCATCAAGTGATGACGAACTCCCTTGAAGC  
GACGCCTGAAATTTCCCCACTGCAGTCATCTTCTGCACCGAGAAATAATTCCTAGTCGTGGTGATATT  
+

```
FF
FFFFFFFFFFFFFFFFFFFFFFFFFFFFFFFFFFFFFFFFFFFFFFFFFFFFFFFFFFFFFFFFFFFFFFFFFFFF,FFFF::FF:FFF
FFFFFFFFFFFFFFFFFFFFFFFFFFFFFFFFFFFFFFFFFFFFFFFFFFFFFFFFFFFFFFFFFFFFFFFFFFFF,FFFF::FF:FFF
@A00155:342:HHGFNDSXY:1:2417:30364:33567 1:N:0:GAACCTAG+TCCGCATA
TTACCGCCCCCTCAGGGGTCAAGAATTGCTTTGAGAGTCCATCAAGTGATGACGAACTCCCTTGAAGC
GACGCCTGAAATTTCCCCTACTGCAGTCATCTTCTGCACCGAGAAATAATTCCTAGTCGTGGTGATATT
+
FFFFFFFFFFFFFFFFFFFFFFFFFFFFFFFFFFFFFFFFFFFFFFFFFFFFFFFFFFFFFFFFFFFFFFFFFFFF
FFFFFFFFFFFFFFFFFFFFFFFFFFFFFFFFFFFFFFFFFFFFFFFFFFFFFFFFFFFFFFFFFFFFFFFFFFFF
@A00155:342:HHGFNDSXY:1:2263:31087:24956 1:N:0:GAACCTAG+TCCGCATA
TTACCGTCCCCTCAGGGGTCAAGAATTGCTTTGAGAGTCCATCAAGTGATGACGAACTCCCTTGAAGC
GACGCCTGAAATTTCCCCTACTGCAGTCATCTTCTGCACCGAGAAATAATTCCTAGTCGTGGTGATATT
+
FFFFFFFFFFFFFFFFFFFFFFFFFFFFFFFFFFFFFFFFFFFFFFFFFFFFFFFFFFFFFFFFFFFFFFFFFFFF
FFFFFFFFFFFFFFFFFFFFFFFFFFFFFFFFFFFFFFFFFFFFFFFFFFFFFFFFFFFFFFFFFFFFFFFFFFFF:FFFFFFFFFFFFFFFFFFFF:F
@A00155:342:HHGFNDSXY:1:1224:9724:24471 1:N:0:GAACCTAG+TCCGCATA
TTACCGTCCCCTCAGGGGTCAAGAATTGCTTTGAGAGTCCATCAAGTGATGACGAACTCCCTTGAAGC
GACGCCTGAAATTTCCCCTACTGCAGTCATCTTCTGCACCGAGAAATAATTCCTAGTCGTGGTGATATT
+
FFFFFFFFFFFFFFFFFFFFFFFFFFFFFFFFFFFFFFFFFFFFFFFFFFFFFFFFFFFFFFFFFFFFFFFFFFFF
FFFFFFFFFFFFFFFFFFFFFFFFFFFFFFFFFFFFFFFFFFFFFFFFFFFFFFFFFFFFFFFFFFFFFFFFFFFF:FFFFFFFFFFFFFFFFFFFF:F
@A00155:342:HHGFNDSXY:1:1315:9579:5744 2:N:0:GAACCTAG+TCCGCATA
TACCGTCCCCTCAGGGGTCAAGAATTGCTTTGAGAGTCCATCAAGTGATGACGAACTCCCTTGAAGCG
ACGCCTGAAATTTCCCCTACTGCAGTCATCTTCTGCACCGAGAAATAATTCCTAGTCGTGGTGATATTG
+
F:F::FFFFFFFF::,:FFFF:F,,::F:,F:FFFFFFFF:FFF::FFFFFFFF:FFFFF,::FF::F
FFFF,FFFFFFFFFFFFFFF:F:,FFF:FFFFFFFF,FF:,FFFFFFFFFFFFFFFFFFFFFFFFFFFF
@A00155:342:HHGFNDSXY:1:2207:31042:27821 1:N:0:GAACCTAG+TCCGCATA
TACCGTCCCCTCAGGGGTCAAGAATTGCTTTGAGAGTCCATCAAGTGATGACGAACTCCCTTGAAGCG
ACGCCTGAAATTTCCCCTACTGCAGTCATCTTCTGCACCGAGAAATAATTCCTAGTCGTGGTGATATTG
+
FFFFFFFFFFFFFFFFFFFFFFFFFFFFFFFFFFFFFFFFFFFFFFFFFFFFFFFFFFFFFFFFFFFFFFFFFFFF:FFFFFFFFFFFFFFFFFFFF
FFFFFFFFFFFFFFFFFFFFFFFFFFFFFFFFFFFFFFFFFFFFFFFFFFFFFFFFFFFFFFFFFFFFFFFFFFFF:FFFFFFF:FFFFFFFFFFFFFFF
@A00155:342:HHGFNDSXY:1:1113:28131:27821 1:N:0:GAACCTAG+TCCGCATA
TACCGTCCCCTCAGGGGTCAAGAATTGCTTTGAGAGTCCATCAAGTGATGACGAACTCCCTTGAAGCG
ACGCCTGAAATTTCCCCTACTGCAGTCATCTTCTGCACCGAGAAATAATTCCTAGTCGTGGTGATATTG
+
FFFFFFFFFFFFFFFFFFFFFFFFFFFFFFFFFFFFFFFFFFFFFFFFFFFFFFFFFFFFFFFFFFFFFFFFFFFF
FF,FFFFFFFFFFFF:FFFFF,FFFF:FFFFFFFF,FFFFFFFFFFFFFFFFFFFFFFFFFFFFFFFFFFFF:FF:
@A00155:342:HHGFNDSXY:1:1143:24424:22122 1:N:0:GAACCTAG+TCCGCATA
TACCGTCCCCTCAGGGGTCAAGAATTGCTTTGAGAGTCCATCAAGTGATGACGAACTCCCTTGAAGCG
ACGCCTGAAATTTCCCCTACTGCAGTCATCTTCTGCACCGAGAAATAATTCCTAGTCGTGGTGATATTG
+
FFFFFFFFFFFFFFFFFFFFFFFFFFFFFFFFFFFFFFFFFFFFFFFFFFFFFFFFFFFFFFFFFFFFFFFFFFFF:FFFFFFFFFFFFFFFFFFFF
FFFFFFFFFFFFFFFFFFFFFFFFFFFFFFFFFFFFFFFFFFFFFFFFFFFFFFFFFFFFFFFFFFFFFFFFFFFF
@A00155:342:HHGFNDSXY:1:1605:9661:17879 1:N:0:GAACCTAG+TCCGCATA
TACCGTCCCCTCAGGGGTCAAGAATTGCTTTGAGAGTCCATCAAGTGATGACGAACTCCCTTGAAGCG
ACGCCTGAAATTTCCCCTACTGCAGTCATCTTCTGCACCGAGAAATAATTCCTAGTCGTGGTGATATTG
+
FFFFFFFFFFFFFFFFFFFFFFFFFFFFFFFFFFFFFFFFFFFFFFFFFFFFFFFFFFFFFFFFFFFFFFFFFFFF:FFFFFFFFFFFFFFFFFFFF
FFFFFFFFFFFFFFFFFFFFFFFFFFFFFFFFFFFFFFFFFFFFFFFFFFFFFFFFFFFFFFFFFFFFFFFFFFFF
@A00155:342:HHGFNDSXY:1:1615:29234:12853 1:N:0:GAACCTAG+TCCGCATA
TACCGTCCCCTCAGGGGTCAAGAATTGCTTTGAGAGTCCATCAAGTGATGACGAACTCCCTTGAAGCG
ACGCCTGAAATTTCCCCTACTGCAGTCATCTTCTGCACCGAGAAATAATTCCTAGTCGTGGTGATATTG
+
```



FFFFFFFFFFFFFFFFFFFFFFFFFFFFFFFFFFFFFFFFFFFFFFFFFFFFFFFFFFFFFFFFFFFFFFFF  
FFFFFFFFFFFFFFFFFFFFFFFFFFFFFFFFFFFFFFFFFFFFFFFFFFFFFFFFFFFFFFFFFFFFFFFF  
@A00155:342:HHGFNDSXY:1:1125:5719:11992 2:N:0:GAACCTAG+TCCGCATA  
CCGTCCCCTCAGGGGTCAAGAATTGCTTTGAGAGTCCATCAAGTGATGACGAACTCCCTTGAAGCGAC  
GCCTGAAATTTCCCCACTGCAGTCATCTTCTGCACCGAGAAATAATTCCTAGTCGTGGTGATAT  
+  
FFFFFFFFFFFFFFFFFFFFFFFFFFFFFFFFFFFFFFFFFFFFFFFFFFFFFFFFFFFFFFFFFFFFFFFF  
FFFFFFFFFFFFFFFFFFFFFFFFFFFFFFFFFFFFFFFFFFFFFFFFFFFFFFFFFFFFFFFFFFFFFFFF  
@A00155:342:HHGFNDSXY:1:1165:15519:29277 1:N:0:GAACCTAG+TCCGCATA  
CCGTCCCCTCAGGGGTCAAGAATTGCTTTGAGAGTCCATCAAGTGATGACGAACTCCCTTGAAGCGAC  
GCCTGAAATTTCCCCACTGCAGTCATCTTCTGCACCGAGAAATAATTCCTAGTCGTGGTGATATTGCT  
+  
FFFFFFFFFFFFFFFFFFFFFFFFFFFFFFFFFFFFFFFFFFFFFFFFFFFFFFFFFFFFFFFFFFFFFFFF  
FFFFFFFFFFFFFFFFFFFFFFFFFFFFFFFFFFFFFFFFFFFFFFFFFFFFFFFFFFFFFFFFFFFFFFFF  
@A00155:342:HHGFNDSXY:1:1557:21034:22388 1:N:0:GAACCTAG+TCCGCATA  
CCGTCCCCTCAGGGGTCAAGAATTGCTTTGAGAGTCCATCAAGTGATGACGAACTCCCTTGAAGCGAC  
GCCTGAAATTTCCCCACTGCAGTCATCTTCTGCACCGAGAAATAATTCCTAGTCGTGGTGATATTGCT  
+  
FFFFFFFFFFFFFFFFFFFFFFFFFFFFFFFFFFFFFFFFFFFFFFFFFFFFFFFFFFFFFFFFFFFFFFFF:FFFF  
FFFFFFFFFFFFFFFFFFFFFFFFFFFFFFFFFFFFFFFFFFFFFFFFFFFFFFFFFFFFFFFFFFFFFFFF:F  
@A00155:342:HHGFNDSXY:1:2337:29017:22310 2:N:0:GAACCTAG+TCCGCATA  
CCGTCCCCTCAGGGGTCAAGAATTGCTTTGAGAGTCCATCAAGTGATGACGAACTCCCTTGAAGCGAC  
GCCTGAAATTTCCCCACTGCAGTCATCTTCTGCACCGAGAAATAATTCCTAGTCGTGGTGATATTGCT  
+  
FFFFFFFFFFFFFFFFFFFFFFFF:F:FFFFFFFFFFFFFFFFFFFFFFFFFFFFFFFFFFFFFFFF:FFFFFF:FFFFFF  
:FFFFFFFFFFFF:FF:FFF:FFFFFF,:FFFF:FFFFFFFF:FFFFFF,FF::F,FF,FFFFFFFFFFFF  
@A00155:342:HHGFNDSXY:1:1323:23547:8860 1:N:0:GAACCTAG+TCCGCATA  
CGTCCCCTCAGGGGTCAAGAATTGCTTTGAGAGTCCATCAAGTGATGACGAACTCCCTTGAAGCGACG  
CCTGAAATTTCCCCACTGCAGTCATCTTCTGCACCGAGAAATAATTCCTAGTCGTGGTGATATTGCTG  
+  
FFFFFFFFFFFFFFFFFFFFFFFFFFFFFFFFFFFFFFFFFFFFFFFFFFFFFFFFFFFFFFFFFFFFFFFF  
FFFFFFFFFFFFFFFFFFFFFFFFFFFFFFFFFFFFFFFFFFFFFFFFFFFFFFFFFFFFFFFFFFFFFFFF  
@A00155:342:HHGFNDSXY:1:1112:6786:29496 1:N:0:GAACCTAG+TCCGCATA  
CGTCCCCTCAGGGGTCAAGAATTGCTTTGAGAGTCCATCAAGTGATGACGAACTCCCTTGAAGCGACG  
CCTGAAATTTCCCCACTGCAGTCATCTTCTGCACCGAGAAATAATTCCTAGTCGTGGTGATATTGCTG  
+  
FFFFF,FFFFFFFFFFFF:F:FF,FFFFFFFFFFFFFFFF:FFFFFFFF,FFFFFFFF:FFFFFFFFFFFF  
FFFFFFFFFFFFFFFF:FFFFFFFFFFFFFFFFFFFFFFFFFFFFFFFF:FFF:FF,FFFFFFFFFFFF,FFFFF  
@A00155:342:HHGFNDSXY:1:1227:10917:21746 1:N:0:GAACCTAG+TCCGCATA  
CGTCCCCTCAGGGGTCAAGAATTGCTTTGAGAGTCCATCAAGTGATGACGAACTCCCTTGAAGCGACG  
CCTGAAATTTCCCCACTGCAGTCATCTTCTGCACCGAGAAATAATTCCTAGTCGTGGTGATATTGCTG  
+  
FFFFFFFFFFFFFFFFFFFF:FFFFFFFFFFFF:FFFFFFFFFFFFFFFFFFFFFFFFFFFFFFFFFFFF  
FFFFFFFFFFFFFFFFFFFFFFFFFFFFFFFFFFFFFFFFFFFFFFFFFFFFFFFFFFFFFFFFFFFFFFFF  
@A00155:342:HHGFNDSXY:1:1131:14714:7999 1:N:0:GAACCTAG+TCCGCATA  
TCCCCTCAGGGGTCAAGAATTGCTTTGAGAGTCCATCAAGTGATGACGAACTCCCTTGAAGCGACGCC  
TGAAATTTCCCCACTGCAGTCATCTTCTGCACCGAGAAATAATTCCTAGTCGTGGTGATATTGCTGTC  
+  
FFFFFFF:FFFFFFFFFFFFFFFFFFFFFFFFFFFFFFFFFFFFFFFFFFFFFFFFFFFFFFFFFFFF  
FFFFFFFFFFFFFFFFFFFFFFFFFFFFFFFFFFFFFFFFFFFFFFFFFFFFFFFFFFFFFFFFFFFF,FFFFFFFFFFFFFFFFFFFF  
@A00155:342:HHGFNDSXY:1:2661:29559:9439 2:N:0:GAACCTAG+TCCGCATA  
CCCCTCAGGGGTCAAGAATTGCTTTGAGAGTCCATCAAGTGATGACGAACTCCCTTGAAGCGACGCCT  
GAAATTTCCCCACTGCAGTCATCTTCTGCACCGAGAAATAATTCCTAGTCGTGGTGATATTGCTGTC  
+

```

FFFFFFFFFFFFFFFFFFFFFFFFFFFFFFFFFFFFFFFFFFFFFFFFFFFFFFFFFFFFFFFFFFFFFFFF
FFFFFFFFFFFFFFFFFFFFFFFFFFFFFFFFFFFFFFFFFFFFFFFFFFFFFFFFFFFFFFFFFFFFFFFF
@A00155:342:HHGFNDSXY:1:1542:2465:29465 2:N:0:GAACCTAG+TCCGCATA
CCCCTCAGGGGTCAAGAATTGCTTTGAGAGTCCATCAAGTGATGACGAACTCCCTTGAAGCGACGCCT
GAAATTTCCCCACTGCAGTCATCTTCTGCACCGAGAAATAATTCCTAGTCGTGGTGATATTGCTGTCA
+
FFFFF,FFF:FFFFFFFF:FF:FFFFFFFFFFFFFFFF:F:FFFFFFFFFFFFFFFFFFFFFFFFFFFF
FFFF:FFFFF::FFFF:FFFFFFFFFFFFFFFFFFFFFFFFFFFFFFFFFFFFFFFFFFFFFFFF:FF
@A00155:342:HHGFNDSXY:1:1672:16586:12493 1:N:0:GAACCTAG+TCCGCATA
CCCTCAGGGGTCAAGAATTGCTTTGAGAGTCCATCAAGTGATGACGAACTCCCTTGAAGCGACGCCTG
AAATTTCCCCACTGCAGTCATCTTCTGCACCGAGAAATAATTCCTAGTCGTGGTGATATTGCTGTCA
+
FFFFFFFFFFFFFFFFFFFFFFFFFFFFFFFFFFFFFFFFFFFFFFFFFFFFFFFFFFFFFFFFFFFFFFFF
FFFFFFFFFFFFFFFFFFFFFFFFFFFFFFFFFFFFFFFFFFFFFFFFFFFFFFFFFFFFFFFFFFFFFFFF
@A00155:342:HHGFNDSXY:1:1645:9435:4304 1:N:0:GAACCTAG+TCCGCATA
CCCTCAGGGGTCAAGAATTGCTTTGAGAGTCCATCAAGTGATGACGAACTCCCTTGAAGCGACGCCTG
AAATTTCCCCACTGCAGTCATCTTCTGCACCGAGAAATAATTCCTAGTCGTGGTGATATTGCTGTCA
+
FFFFFFFFFFFFFFFFFFFFFFFFFFFFFFFFFFFFFFFFFFFFFFFFFFFFFFFFFFFFFFFFFFFFFFFF
FFFFFFFFFFFFFFFFFFFFFFFFFFFFFFFFFFFFFFFFFFFFFFFFFFFFFFFFFFFFFFFFFFFFFFFF
@A00155:342:HHGFNDSXY:1:1418:27950:17957 1:N:0:GAACCTAG+TCCGCATA
CCCTCAGGGGTCAAGAATTGCTTTGAGAGTCCATCAAGTGATGACGAACTCCCTTGAAGCGACGCCTG
AAATTTCCCCACTGCAGTCATCTTCTGCACCGAGAAATAATTCCTAGTCGTGGTGATATTGCTGTCA
+
FFFFFFFFFFFFFFFFFFFFFFFFFFFFFFFFFFFFFFFFFFFFFFFFFFFFFFFFFFFFFFFFFFFFFFFF
FFFFFFFFFFFFFFFFFFFFFFFFFFFFFFFFFFFFFFFFFFFFFFFFFFFFFFFFFFFFFFFFFFFFFFFF
@A00155:342:HHGFNDSXY:1:1464:26268:5274 2:N:0:GAACCTAG+TCCGCATA
CTCAGGGGTCAAGAATTGCTTTGAGAGTCCATCAAGTGATGACGAACTCCCTTGAAGCGACGCCTGAA
ATTTCCCCACTGCAGTCATCTTCTGCACCGAGAAATAATTCCTAGTCGTGGTGATATTGCT
+
FFFF:FFFFFFFF:FFFFFFFFFFFFFFFFFFFF,:FFFFFFFFFFFFFFFFFFFFFFFF:FFFFFFFFFFFF
F,FFFFFFFFFFFFFF,FF:FFFFFFFFFFFFFFFFFFFFFFFFFFFFFFFFFFFFFFFFFFFFFFFF
@A00155:342:HHGFNDSXY:1:1338:26359:26412 2:N:0:GAACCTAG+TCCGCATA
CTCAGGGGTCAAGAATTGCTTTGAGAGTCCATCAAGTGATGACGAACTCCCTTGAAGCGACGCCTGAA
ATTTCCCCACTGCAGTCATCTTCTGCACCGAGAAATAATTCCTAGTCGTGGTGATATTGCTGTCA
+
FFFFFFFFFFFFFFFFFFFF:FFFFFFFFFFFFFFFFFFFFFFFFFFFFFFFFFFFFFFFFFFFFFFFFFFFF
FFFFFFFFFFFF:FFFFFFFFFFFFFFFFFFFFFFFFFFFFFFFFFFFFFFFFFFFFFFFFFFFFFFFFFFFF
@A00155:342:HHGFNDSXY:1:2213:10800:8328 2:N:0:GAACCTAG+TCCGCATA
TCAGGGGTCAAGAATTGCTTTGAGAGTCCATCAAGTGATGACGAACTCCCTTGAAGCGACGCCTGAAA
TTTCCCCACTGCAGTCATCTTCTGCACCGAGAAATAATTCCTAGTCGTGGTGATATTGCTGTCATTCA
+
:F,FFFFFFFFF:FFFF:F,FFFFFFFF:FF::F:FFFFFFFF:FF,FFF::FF,FFFFFFFFFFFFFF
F,FFFFFFFFFFFFFF,FFFFFFFFFFFFFF:FFFFFFFFFFFFFFFFFFFFFFFFFFFFFFFFFFFFFF
@A00155:342:HHGFNDSXY:1:1537:30544:11209 2:N:0:GAACCTAG+TCCGCATA
TCAGGGGTCAAGAATTGCTTTGAGAGTCCATCAAGTGATGACGAACTCCCTTGAAGCGACGCCTGAAA
TTTCCCCACTGCAGTCATCTTCTGCACCGAGAAATAATTCCTAGTCGTGGTGATATTGCTGTCATTCA
+
FFFFFFFFFFFFFFFFFFFFFFFFFFFFFFFFFFFFFFFFFFFFFFFFFFFFFFFFFFFFFFFFFFFFFFFF
FFFFFFFFFFFF:F:FFFF:F,FFFFFFFFFFFFFFFFFFFF,FFFFFFFFFFFFFFFFFFFFFFFFFFFF
@A00155:342:HHGFNDSXY:1:1206:14751:8312 2:N:0:GAACCTAG+TCCGCATA
CAGGGGTCAAGAAGTGCTTTGAGAGTCCATCAAGTGATGACGAACTCCCTTGAAGCGACGCCTGAAAT
TTCCCCACTGCAGTCATCTTCTGCACCGAGAAATAATTCCTAGTCGTGGTGATATTGCTGTCATTCA
+

```

F,FFFFFFFFFFFF,FFFFFFFFFFFFFFFF:FF:FFFFFFFFF:,FFFFF::FFFFFFFFFFFF:FFFFF  
:FFFFFFFFFFFFFFFF:FFFFFFFFFFFFFFFFFFFFFFFFFFFFFFFFFFFFFFFFFFFFFFFF  
@A00155:342:HHGFNDSXY:1:1557:21034:22388 2:N:0:GAACCTAG+TCCGCATA  
CAGGGGTCAAGAATTGCTTTGAGAGTCCATCAAGTGATGACGAACTCCCTTGAAGCGACGCCTGAAAT  
TCCCCACTGCAGTCATCTTCTGCACCGAGAAATAATTCCTAGTCGTGGTGATATTGCTGTCATTAC  
+  
FFFFFFFFFFFFFFFF:F:FFFFFFFFFFFFFFFFFFFFFFFFFFFFFFFFFFFFFFFF:FF::FFFFF  
:FFFFFFF:F:FF::FFFFFFFFFFFFFFFFFFFFFFFFFFFFFFFFFFFFFFFF:FFFF:FFF:FFFF  
@A00155:342:HHGFNDSXY:1:1272:20229:1360 2:N:0:GAACCTAG+TCCGCATA  
CAGGGGTCAAGAATTGCTTTGAGAGTCCATCAAGTGATGACGAACTCCCTTGAAGCGACGCCTGAAAT  
TCCCCACTGCAGTCATCTTCTGCACCGAGAAATAATTCCTAGTCGTGGTGATATTGCTGTCATTAC  
+  
FF,:FFFFF,FFFFFFFFF::FFFFFFFFFFFF:,F:F:FFFFFFFFFFFF:FF:FFFFFFFF,FFF:F  
,FFFFFFFF:FFFFFFFF:FFF:FFFFFFFFFFFFFFFFFFFFFFFFFFFFFFFFFFFFFFFF:FFFF  
@A00155:342:HHGFNDSXY:1:2431:6542:9502 1:N:0:GAACCTAG+TCCGCATA  
AGGGGTCAAGAATTGCTTTGAGAGTCCATCAAGTGATGACGAACTCCCTTGAAGCGACGCCTGAAAT  
TCCCCACTGCAGTCATCTTCTGCACCGAGAAATAATTCCTAGTCGTGGTGATATTGCTG  
+  
FFFFFFFFFFFFFFFFFFFFFFFFFFFFFFFFFFFFFFFFFFFFFFFF:FFFFFFFFFFFFFFFFFFFF  
FFFFFFFFFFFFFFFFFFFFFFFFFFFFFFFFFFFFFFFF:FFFFFFFFFFFFFFFFFFFFFFFFFFFF  
@A00155:342:HHGFNDSXY:1:2256:30183:35258 1:N:0:GAACCTAG+TCCGCATA  
AGGGGTCAAGAATTGCTTTGAGAGTCCATCAAGTGATGACGAACTCCCTTGAAGCGACGCCTGAAAT  
TCCCCACTGCAGTCATCTTCTGCACCGAGAAATAATTCCTAGTCGTGGTGATATTGCTGTCATTCACT  
+  
FFFFFFFFFFFFFFFFFFFFFFFFFFFFFFFFFFFFFFFFFFFFFFFFFFFFFFFFFFFFFFFFFFFFF  
FFFFFFFFFFFFFFFFFFFFFFFFFFFFFFFFFFFFFFFFFFFFFFFFFFFFFFFFFFFF,,FFFFFFFFFFFFF  
@A00155:342:HHGFNDSXY:1:2403:31882:24017 2:N:0:GAACCTAG+TCCGCATA  
AGGGGTCAAGAATTGCTTTGAGAGTCCATCAAGTGATGACGAACTCCCTTGAAGCGACGCCTGAAAT  
TCCCCACTGCAGTCATCTTCTGCACCGAGAAATAATTCCTAGTCGTGGTGATATTGCTGTCATTCACT  
+  
:FFFFFFFFF:,FFFF:FF:FFFFFF,FFF,FFFF,FFFF:FFFF:FFF:FFFFFFFFFFFF,:F,  
FFFF:F,FFFFFF::F:FFFFFFFFF:F:FFFFFFFFFFFFFFFFFFFFFFFFFFFFFFFF:FFFF  
@A00155:342:HHGFNDSXY:1:2417:30364:33567 2:N:0:GAACCTAG+TCCGCATA  
AGGGGTCAAGAATTGCTTTGAGAGTCCATCAAGTGATGACGAACTCCCTTGAAGCGACGCCTGAAAT  
TCCCCACTGCAGTCATCTTCTGCACCGAGAAATAATTCCTAGTCGTGGTGATATTGCTGTCATTCACT  
+  
FFFFFFFFFFFF:FFFFFFFFFFFFFFFFFFFFFFFFFFFFFFFFFFFFFFFF:FFFFFFFFFFFFFFFFFFFF:  
FFFFF,FFFFFFFF,FFFFFFFFFFFFFFFFFFFFFFFFFFFFFFFFFFFFFFFFFFFFFFFFFFFFF  
@A00155:342:HHGFNDSXY:1:2422:18295:31297 2:N:0:GAACCTAG+TCCGCATA  
AGGGGTCAAGAATTGCTTTGAGAGTCCATCAAGTGATGACGAACTCCCTTGAAGCGACGCCTGAAAT  
TCCCCACTGCAGTCATCTTCTGCACCGAGAAATAATTCCTAGTCGTGGTGATATTGCTGTCATTCACT  
+  
FFFFFFFFFFFFFFFFFFFFFFFFFFFFFFFFFFFFFFFFFFFFFFFF:FFFFFFFFFFFF:FFFF:FFFFFFFFF,F  
F:FFFFFFFFFFFF:FFFFFFFFFFFFFFFFFFFFFFFFFFFFFFFFFFFFFFFFFFFFFFFFFFFF:FFFF  
@A00155:342:HHGFNDSXY:1:1224:9724:24471 2:N:0:GAACCTAG+TCCGCATA  
AGGGGTCAAGAATTGCTTTGAGAGTCCATCAAGTGATGACGAACTCCCTTGAAGCGACGCCTGAAAT  
TCCCCACTGCAGTCATCTTCTGCACCGAGAAATAATTCCTAGTCGTGGTGATATTGCTGTCATTCACT  
+  
FFFFFFFFFFFF:FFFF:FFFF:FFFFFFFF,:FFFFFFFFFFFFFFFF:F,FFFFFFFF:FFFF:F  
FFFFFFFFFFFFFFFF,F:FFFFFFFFFFFF,:FFFFFFFFFFFFFFFFFFFFFFFFFFFFFFFFFFFFF  
@A00155:342:HHGFNDSXY:1:2334:19479:23610 1:N:0:GAACCTAG+TCCGCATA  
AGGGGTCAAGAATTGCTTTGAGAGTCCATCAAGTGATGACGAACTCCCTTGAAGCGACGCCTGAAAT  
TCCCCACTGCAGTCATCTTCTGCACCGAGAAATAATTCCTAGTCGTGGTGATATTGCTGTCATTCACT  
+

[illegible]

FF:FFFFFFFF:FFFFFFFFFFFFFFFF,FF:FFFFFFFF:FFFF  
FF,FFFFFFFF:FFFF:FFFFFFFFFFFFFFFFFFFFFFFFFFFFFFFFFFFFFFFF  
@A00155:342:HHGFNDSXY:1:2622:17029:16736 2:N:0:GAACCTAG+TCCGCATA  
GGTCAAGAATTGCTTTGAGAGTCCATCAAGTGATGACGAACTCCCTTGAAGCGACGCCTGAAATTTCC  
CCACTGCAGTCATCTTCTGCACCGAGAAATAATTCCTAGTCGTGGTGATATTGCTGTCATTCACTCGC  
+  
FFFFFFFFFFFFFFFFFFFFFFFFFFFFFFFFFFFFFFFF,FFFFFFFFFFFFFFFF,FFFF  
FFFFFFFF:FFFFFFFF:FFFFFFFFFFFFFFFFFFFFFFFFFFFFFFFFFFFFFFFF:FFFFFFFF  
@A00155:342:HHGFNDSXY:1:1533:6117:26804 2:N:0:GAACCTAG+TCCGCATA  
GGTCAAGAAGTGCTTTGAGAGTCCATCAAGTGATGACGAACTCCCTTGAAGCGACGCCTGAAATTTCC  
CCACTGCAGTCATCTTCTGCACCGAGAAATAATTCCTAGTCGTGGTGATATTGCTGTCATTCACTCGC  
+  
FFFFFFFF,FFF:FFFFFFFFFFFFFFFFFFFFFFFF:F:FFFF:FFFFFFFFFFFFFFFF  
FFFFFFFF:FFFFFF:FFFFFFFFFFFFFFFFFFFFFFFFFFFFFFFFFFFFFFFF:FFFFFF  
@A00155:342:HHGFNDSXY:1:2147:3613:21245 2:N:0:GAACCTAG+TCCGCATA  
GTCAAGAATTGCTTTGAGAGTCCATCAAGTGATGACGAACTCCCTTGAAGCGACGCCTGAAATTTCCC  
CACTGCAGTCATCTTCTGCACCGAGAAATAATTCCTAGTCGTGGTGATATTGCTGTCATTCACTCG  
+  
FFFFF,FFFF:FFFF:FFFFFFFFFFFFFFFFFFFFFFFFFFFFFFFFFFFFFFFF  
FFF:FFFF,F:FFFFFFFFFFFFFFFFFFFFFFFFFFFFFFFFFFFFFFFF  
@A00155:342:HHGFNDSXY:1:2547:10330:25864 1:N:0:GAACCTAG+TCCGCATA  
GTCAAGAATTGCTTTGAGAGTCCATCAAGTGATGACGAACTCCCTTGAAGCGACGCCTGAAATTTCCC  
CACTGCAGTCATCTTCTGCACCGAGAAATAATTCCTAGTCGTGGTGATATTGCTGTCATTCACTCGCA  
+  
FFFFFFFFFFFFFFFFFFFFFFFFFFFFFFFFFFFFFFFFFFFFFFFFFFFFFFFF  
FFFFFFFFFFFFFFFFFFFFFFFFFFFFFFFFFFFFFFFFFFFFFFFFFFFFFFFF  
@A00155:342:HHGFNDSXY:1:1423:30508:7921 1:N:0:GAACCTAG+TCCGCATA  
GTCAAGAATTGCTTTGAGAGTCCATCAAGTGATGACGAACTCCCTTGAAGCGACGCCTGAAATTTCCC  
CACTGCAGTCATCTTCTGCACCGAGAAATAATTCCTAGTCGTGGTGATATTGCTGTCATTCACTCGCA  
+  
FFFFFFFFFFFFFFFFFFFFFFFFFFFFFFFFFFFFFFFF:FFFF:FFFFFFFFFFFFFFFF  
FFFFFFFFFFFFFFFFFFFFFFFFFFFFFFFFFFFFFFFFFFFFFFFFFFFFFFFF  
@A00155:342:HHGFNDSXY:1:1555:20112:16814 1:N:0:GAACCTAG+TCCGCATA  
GTCAAGAATTGCTTTGAGAGTCCATCAAGTGATGACGAACTCCCTTGAAGCGACGCCTGAAATTTCCC  
CACTGCAGTCATCTTCTGCACCGAGAAATAATTCCTAGTCGTGGTGATATTGCTGTCATTCACTCGCA  
+  
FFFFFFFFFFFFFFFFFFFFFFFFFFFFFFFFFFFFFFFFFFFFFFFFFFFFFFFF  
FFFFFFFFFFFFFFFFFFFFFFFFFFFFFFFFFFFFFFFFFFFFFFFFFFFFFFFF:  
@A00155:342:HHGFNDSXY:1:1272:20229:1360 1:N:0:GAACCTAG+TCCGCATA  
GTCAAGAATTGCTTTGAGAGTCCATCAAGTGATGACGAACTCCCTTGAAGCGACGCCTGAAATTTCCC  
CACTGCAGTCATCTTCTGCACCGAGAAATAATTCCTAGTCGTGGTGATATTGCTGTCATTCACTCGCA  
+  
FFFFFFFFFFFFFFFFFFFFFFFFFFFFFFFFFFFFFFFFFFFFFFFFFFFFFFFF  
FFFFFFFFFFFFFFFFFFFFFFFFFFFFFFFFFFFFFFFF,FFFFFFFFFFFFFFFF:FFF  
@A00155:342:HHGFNDSXY:1:1235:24198:33567 1:N:0:GAACCTAG+TCCGCATA  
GTCAAGAATTGCTTTGAGAGTCCATCAAGTGATGACGAACTCCCTTGAAGCGACGCCTGAAATTTCCC  
CACTGCAGTCATCTTCTGCACCGAGAAATAATTCCTAGTCGTGGTGATATTGCTGTCATTCACTCGCA  
+  
FFFFFFFFFFFFFFFFFFFFFFFFFFFFFFFFFFFFFFFFFFFFFFFFFFFFFFFF  
FFFFFFFF:FFFFFFFFFFFFFFFFFFFFFFFFFFFFFFFF,FFFFFFFFFFFFFFFF  
@A00155:342:HHGFNDSXY:1:2510:12382:10786 2:N:0:GAACCTAG+TCCGCATA  
GTCAAGAATTGCTTTGAGAGTCCATCAAGTGATGACGAACTCCCTTGAAGCGACGCCTGAAATTTCCC  
CACTGCAGTCATCTTCTGCACCGAGAAATAATTCCTAGTCGTGGTGATATTGCTGTCATTCACTCGCA  
+

FFF:FFF:FFF:::FFFFFFFFF,FFFFFFFFFFFF:FFFFFFFFFFFFFFFFFFFF:FFF:FFFF  
FFFFFFFFFFFFFFFFFFFFFFFFFFFFFFFFFFFFFFFFFFFFFFFFFFFFFFFFFFFFFFFFFFFF  
@A00155:342:HHGFNDSXY:1:1314:32624:18505 1:N:0:GAACCTAG+TCCGCATA  
GTCAAGAATTGCTTTGAGAGTCCATCAAGTGATGACGAACTCCCTTGAAGCGACGCCTGAAATTTCCC  
CACTGCAGTCATCTTCTGCACCGAGAAATAATTCCTAGTCGTGGTGATATTGCTGTCATTCACTCGCA  
+  
FFFFFFFFFFFFF:FFFFFFFFFFFFFFFFFFFFFFFFFFFF:FF,FFF:FFFFFFFFFFFFFFFFFFFFF  
FFFFFFFFFFFFFFFFFFFFFFFFFFFFFFFFFFFFFFFFFFFF:FFF:FFFF,,FFFFFFFFFFFFFFFFFFFF  
@A00155:342:HHGFNDSXY:1:1219:17201:35102 1:N:0:GAACCTAG+TCCGCATA  
GTCAAGAATTGCTTTGAGAGTCCATCAAGTGATGACGAACTCCCTTGAAGCGACGCCTGAAATTTCCC  
CACTGCAGTCATCTTCTGCACCGAGAAATAATTCCTAGTCGTGGTGATATTGCTGTCATTCACTCGCA  
+  
FFFFFFFFFFFFFFFFFFFFFFFFFFFFFFFFFFFFFFFFFFFFFFFFFFFFFFFFFFFFFFFFFFFF:F  
FFFFFFFFFFFFFFFFFFFFFFFFFFFFFFFFFFFFFFFFFFFFFFFFFFFFFFFFFFFFFFFFFFFF:FFFFFFFF  
@A00155:342:HHGFNDSXY:1:1555:21151:17237 1:N:0:GAACCTAG+TCCGCATA  
GTCAAGAATTGCTTTGAGAGTCCATCAAGTGATGACGAACTCCCTTGAAGCGACGCCTGAAATTTCCC  
CACTGCAGTCATCTTCTGCACCGAGAAATAATTCCTAGTCGTGGTGATATTGCTGTCATTCACTCGCA  
+  
FFFFFFFFFFFFFFFFFFFFFFFFFFFFFFFFFFFFFFFFFFFFFFFFFFFFFFFFFFFFFFFFFFFFF  
FFFFFFFFFFFFFFFFFFFFFFFFFFFFFFFFFFFFFFFFFFFFFFFFFFFFFFFFFFFF:FFFFFFFFFFFFFFFF  
@A00155:342:HHGFNDSXY:1:1125:5719:11992 1:N:0:GAACCTAG+TCCGCATA  
TCAAGAATTGCTTTGAGAGTCCATCAAGTGATGACGAACTCCCTTGAAGCGACGCCTGAAATTTCCCC  
ACTGCAGTCATCTTCTGCACCGAGAAATAATTCCTAGTCGTGGTGATATTGCTGTCATTCACTC  
+  
FFFF:FFFFFFFFFFFFFFFFFFFF:FFFFF,FFFFFFFFF:FFFFFFFFFFFFFFFFFFFFFFFFFFFFF  
FFFFFFFFFFFFFFFFFFFFFFFFFFFFFFFFFFFFFFFFFFFFFFFFFFFF,FF:FFF:FFFFFFFFFFFF  
@A00155:342:HHGFNDSXY:1:2276:17644:4899 1:N:0:GAACCTAG+TCCGCATA  
TCAAGAATTGCTTTGAGAGTCCATCAAGTGATGACGAACTCCCTTGAAGCGACGCCTGAAATTTCCCC  
ACTGCAGTCATCTTCTGCACCGAGAAATAATTCCTAGTCGTGGTGATATTGCTGTCATTCACTCGCAG  
+  
FFFFFFFFFFFFFFFFFFFFFFFFFFFFFFFFFFFFFFFFFFFFFFFFFFFFFFFFFFFFFFFFFFFFF  
FFFFFFFFFFFFFFFFFFFFFFFFFFFFFFFFFFFFFFFFFFFFFFFFFFFFFFFFFFFFFFFFFFFF:FFFFF  
@A00155:342:HHGFNDSXY:1:1130:7934:21966 1:N:0:GAACCTAG+TCCGCATA  
TCAAGAATTGCTTTGAGAGTCCATCAAGTGATGACGAACTCCCTTGAAGCGACGCCTGAAATTTCCCC  
ACTGCAGTCATCTTCTGCACCGAGAAATAATTCCTAGTCGTGGTGATATTGCTGTCATTCACTCGCAG  
+  
FFFFFFFFFFFFFFFFFFFFF:FFFFFFFFFFFFFFFFFFFFF:FFFFFFFFFFFFFFFFFFFFF:F  
FFFFFFFFFFFFFFFFF:FF:FFFFF:FFFFFFFFFFFFFFFFFFFF:FFFFFFFFFFFFF:FFFFFFFF  
@A00155:342:HHGFNDSXY:1:2411:6379:17112 1:N:0:GAACCTAG+TCCGCATA  
TCAAGAATTGCTTTGAGAGTCCATCAAGTGATGACGAACTCCCTTGAAGCGACGCCTGAAATTTCCCC  
ACTGCAGTCATCTTCTGCACCGAGAAATAATTCCTAGTCGTGGTGATATTGCTGTCATTCACTCGCAG  
+  
FFFFFFFFFFFFFFFFFFFFFFFFFFFFFFFFFFFFF:FFFFFFFFFFFFF:FFFFFFFFFFFFFFFFFFFFF  
FFFFFFFFFFFFFFFFFFFFFFFFFFFFFFFFFFFFFFFFFFFFFFFFFFFF:FFFFFFFFFFFFFFFFFFFFF  
@A00155:342:HHGFNDSXY:1:1566:27073:9518 1:N:0:GAACCTAG+TCCGCATA  
TCAAGAATTGCTTTGAGAGTCCATCAAGTGATGACGAACTCCCTTGAAGCGACGCCTGAAATTTCCCC  
ACTGCAGTCATCTTCTGCACCGAGAAATAATTCCTAGTCGTGGTGATATTGCTGTCATTCACTCGCAG  
+  
FFFFFFFFFFFFFFFFFFFFFFFFFFFFFFFFFFFFFFFFFFFFFFFFFFFFFFFFFFFFFFFFFFFFF  
FFFFFFFFFFFFFFFFFFFFFFFFFFFFFFFFFFFFFFFFFFFFFFFFFFFFFFFFFFFFFFFFFFFFF  
@A00155:342:HHGFNDSXY:1:1528:30915:10191 1:N:0:GAACCTAG+TCCGCATA  
CAAGAATTGCTTTGAGAGTCCATCAAGTGATGACGAACTCCCTTGAAGCGACGCCTGAAATTTCCCCA  
CTGCAGTCATCTTCTGCACCGAGAAATAATTCCTAGTCGTGGTGATATTGCTGTCATTCACTCGCAGC  
+

[illegible]

FFFFFFFFFFFFFFFFFFFFFFFFFFFFFFFFFFFFFFFFFFFFFFFFFFFFFFFFFFFFFFFFFFFFFFFF  
FFFFFFFFFFFFFFFFFFFFFFFFFFFFFFFFFFFFFFFFFFFFFFFFFFFFFFFFFFFFFFFFFFFFFFFF  
@A00155:342:HHGFNDSXY:1:1357:1796:3004 1:N:0:GAACCTAG+TCCGCATA  
AAGAATTGCTTTGAGAGTCCATCAAGTGATGACGAACTCCCTTGAAGCGACGCCTGAAATTTCCCCAC  
TGCAGTCATCTTCTGCACCGAGAAATAATTCCTAGTCGTGGTGATATTGCTGTCATTCACTCGCAGCA  
+  
FFFFFFFFFFFFFFFFFFFFFFFFFFFFFFFFFFFFFFFFFFFFFFFFFFFFFFFFFFFFFFFFFFFFFFFF:F  
FFFFFFFFFFFFFFFFFFFFFFFFFFFFFFFFFFFFFFFFFFFFFFFFFFFFFFFFFFFFFFFFFFFFFFFF:F  
@A00155:342:HHGFNDSXY:1:1321:10926:36479 1:N:0:GAACCTAG+TCCGCATA  
AAGAATTGCTTTGAGAGTCCATCAAGTGATGACGAACTCCCTTGAAGCGACGCCTGAAATTTCCCCAC  
TGCAGTCATCTTCTGCACCGAGAAATAATTCCTAGTCGTGGTGATATTGCTGTCATTCACTCGCAGCA  
+  
F:FFFFFFFFFFFFFFFFFFFFFFFFFFFFFFFFFFFFFFFFFFFFFFFFFFFFFFFFFFFFFFFFFFFFFFFF  
FFFFFFFFFFFFFFFFFFFFFFFFFFFFFFFFFFFFFFFFFFFFFFFFFFFFFFFFFFFFFFFFFFFFFFFF  
@A00155:342:HHGFNDSXY:1:1315:19940:35650 1:N:0:GAACCTAG+TCCGCATA  
AAGAATTGCTTTGAGAGTCCATCAAGTGATGACGAACTCCCTTGAAGCGACGCCTGAAATTTCCCCAC  
TGCAGTCATCTTCTGCACCGAGAAATAATTCCTAGTCGTGGTGATATTGCTGTCATTCACTCGCAGCA  
+  
FFFFFFFFFFFFFFFFFFFFFFFFFFFFFFFFFFFFFFFFFFFFFFFFFFFFFFFFFFFFFFFFFFFFFFFF  
FFFFFFFFFFFFFFFFFFFFFFFFFFFFFFFFFFFFFFFFFFFFFFFFFFFFFFFFFFFFFFFFFFFFFFFF:F  
@A00155:342:HHGFNDSXY:1:1229:30400:8296 1:N:0:GAACCTAG+TCCGCATA  
AAGAATTGCTTTGAGAGTCCATCAAGTGATGACGAACTCCCTTGAAGCGACGCCTGAAATTTCCCCAC  
TGCAGTCATCTTCTGCACCGAGAAATAATTCCTAGTCGTGGTGATATTGCTGTCATTCACTCGCAGCA  
+  
FFFFFFFFFFFFFFFFFFFFFFFFFFFFFFFFFFFFFFFFFFFFFFFFFFFFFFFFFFFFFFFFFFFFFFFF:F  
FFFFFFFFFFFFFFFFFFFFFFFFFFFFFFFFFFFFFFFFFFFFFFFFFFFFFFFFFFFFFFFFFFFFFFFF:FF  
@A00155:342:HHGFNDSXY:1:1206:16667:21339 1:N:0:GAACCTAG+TCCGCATA  
AAGAATTGCTTTGAGAGTCCATCAAGTGATGACGAACTCCCTTGAAGCGACGCCTGAAATTTCCCCAC  
TGCAGTCATCTTCTGCACCGAGAAATAATTCCTAGTCGTGGTGATATTGCTGTCATTCACTCGCAGCA  
+  
FFFFFFF:FFFFFFFFFFFFFFFFFFFFFFFFFFFFFFFFFFFFFFFFFFFFFFFFFFFFFFFFFFFFFFFF  
FFFFFFFFFFFFFFFFFFFFFFFFFFFFFFFFFFFFFFFFFFFFFFFFFFFFFFFFFFFFFFFFFFFFFFFF  
@A00155:342:HHGFNDSXY:1:1341:18358:15718 1:N:0:GAACCTAG+TCCGCATA  
AAGAATTGCTTTGAGAGTCCATCAAGTGATGACGAACTCCCTTGAAGCGACGCCTGAAATTTCCCCAC  
TGCAGTCATCTTCTGCACCGAGAAATAATTCCTAGTCGTGGTGATATTGCTGTCATTCACTCGCAGCA  
+  
FFFFFFFFFFFFF:FFFFFFFFFFFFFFFFFFFFFFFFFFFFFFFFFFFFFFFFFFFFFFFFFFFFFFFFFFFF  
FFFFFFFFFFFFFFFFFFFFFFFFFFFFFFFFFFFFFFFFFFFFFFFFFFFFFFFFFFFFFFFFFFFFFFFF:FFFFF,FFFFFFFFFFFFFFFF  
@A00155:342:HHGFNDSXY:1:2218:10122:35243 2:N:0:GAACCTAG+TCCGCATA  
AAGAATTGCTTTGAGAGTCCATCAAGTGATGACGAACTCCCTTGAAGCGACGCCTGAAATTTCCCCAC  
TGCAGTCATCTTCTGCACCGAGAAATAATTCCTAGTCGTGGTGATATTGCTGTCATTCACTCGCAGCA  
+  
FFFFFFFFFFFFFFFFFFFFFFFFFFFFFFFFFFFFFFFFFFFFFFFFFFFFFFFFFFFFFFFFFFFFFFFF:F  
FFFFFFFFFFFFFFFFFFFFFFFFFFFFFFFFFFFFFFFFFFFFFFFFFFFFFFFFFFFFFFFFFFFFFFFF:FFFFF:FFFFF:FFFFF:FFFFF,FFFF:  
@A00155:342:HHGFNDSXY:1:2416:13539:6715 1:N:0:GAACCTAG+TCCGCATA  
AAGAATTGCTTTGAGAGTCCATCAAGTGATGACGAACTCCCTTGAAGCGACGCCTGAAATTTCCCCAC  
TGCAGTCATCTTCTGCACCGAGAAATAATTCCTAGTCGTGGTGATATTGCTGTCATTCACTCGCAGCA  
+  
FFFFFFFFFFFFFFFFFFFFFFFFFFFFFFFFFFFFFFFFFFFFFFFFFFFFFFFFFFFFFFFFFFFFFFFF:F  
FFFFFFFFFFFFFFFFFFFFFFFFFFFFFFFFFFFFFFFFFFFFFFFFFFFFFFFFFFFFFFFFFFFFFFFF  
@A00155:342:HHGFNDSXY:1:1206:16233:16736 1:N:0:GAACCTAG+TCCGCATA  
AAGAATTGCTTTGAGAGTCCATCAAGTGATGACGAACTCCCTTGAAGCGACGCCTGAAATTTCCCCAC  
TGCAGTCATCTTCTGCACCGAGAAATAATTCCTAGTCGTGGTGATATTGCTGTCATTCACTCGCAGCA  
+



FFFFF:FFFFFFFFFFFFFFFFFFFFFFFFFFFFFFFFFFFFFFFFFFFFFFFFFFFFFFFFFFFFFFFFFFFFF  
FFFFFFFFFFFFFFFFFFFFFFFFFFFFFFFFFFFFFFFFFFFFFFFFFFFFFFFFFFFFFFFFFFFFFFFFFFFFF  
@A00155:342:HHGFNDSXY:1:1206:15176:16595 1:N:0:GAACCTAG+TCCGCATA  
AAGAATTGCTTTGAGAGTCCATCAAGTGATGACGAACTCCCTTGAAGCGACGCCTGAAATTTCCCCAC  
TGCAGTCATCTTCTGCACCGAGAAATAATTCCTAGTCGTGGTGATATTGCTGTCATTCACTCGCAGCA  
+  
FFFFFFFFFFFFFFFFFFFFFFFFFFFFFFFFFFFFFFFFFFFFFFFFFFFFFFFFFFFFFFFFFFFFFFFFFFFFF  
FFFFFFFFFFFFFFFFFFFFFFFFFFFFFFFFFFFFFFFFFFFFFFFFFFFFFFFFFFFFFFFFFFFFFFFFFFFFF  
@A00155:342:HHGFNDSXY:1:2464:15393:35070 1:N:0:GAACCTAG+TCCGCATA  
AAGAATTGCTTTGAGAGTCCATCAAGTGATGACGAACTCCCTTGAAGCGACGCCTGAAATTTCCCCAC  
TGCAGTCATCTTCTGCACCGAGAAATAATTCCTAGTCGTGGTGATATTGCTGTCATTCACTCGCAGCA  
+  
F:FFFFFFFFFFFFFFFFFFFFFFFFFFFFFFFFFFFFFFFFFFFFFFFFFFFFFFFFFFFFFFFFFFFFFFFFFFFFF  
FFFFFFFFFFFFFFFFFFFFFFFFFFFFFFFFFFFFFFFFFFFFFFFFFFFFFFFFFFFFFFFFFFFFFFFFFFFFF  
@A00155:342:HHGFNDSXY:1:1206:16107:16517 1:N:0:GAACCTAG+TCCGCATA  
AAGAATTGCTTTGAGAGTCCATCAAGTGATGACGAACTCCCTTGAAGCGACGCCTGAAATTTCCCCAC  
TGCAGTCATCTTCTGCACCGAGAAATAATTCCTAGTCGTGGTGATATTGCTGTCATTCACTCGCAGCA  
+  
FFFFFFFFFFFFFFFFFFFFFFFFFFFFFFFFFFFFFFFFFFFFFFFFFFFFFFFFFFFFFFFFFFFFFFFFFFFFF  
FFFFFFFFFFFFFFFFFFFFFFFFFFFFFFFFFFFFFFFFFFFFFFFFFFFFFFFFFFFFFFFFFFFFFFFFFFFFF  
@A00155:342:HHGFNDSXY:1:2437:8106:33411 1:N:0:GAACCTAG+TCCGCATA  
AAGAATTGCTTTGAGAGTCCATCAAGTGATGACGAACTCCCTTGAAGCGACGCCTGAAATTTCCCCAC  
TGCAGTCATCTTCTGCACCGAGAAATAATTCCTAGTCGTGGTGATATTGCTGTCATTCACTCGCAGCA  
+  
FFFFFFFFFFFFFFFFFFFFFFFFFFFFFFFFFFFFFFFFFFFFFFFFFFFFFFFFFFFFFFFFFFFFFFFFFFFFF  
FFFFFFFFFFFFFFFFFFFFFFFFFFFFFFFFFFFFFFFFFFFFFFFFFFFFFFFFFFFFFFFFFFFFFFFFFFFFF  
@A00155:342:HHGFNDSXY:1:1172:24469:14716 1:N:0:GAACCTAG+TCCGCATA  
AAGAATTGCTTTGAGAGTCCATCAAGTGATGACGAACTCCCTTGAAGCGACGCCTGAAATTTCCCCAC  
TGCAGTCATCTTCTGCACCGAGAAATAATTCCTAGTCGTGGTGATATTGCTGTCATTCACTCGCAGCA  
+  
FFFFFFFFFFFFFFFFFFFFFFFFFFFFFFFFFFFFFFFFFFFFFFFFFFFFFFFFFFFFFFFFFFFFFFFFFFFFF  
FFFFFFFFFFFFFFFFFFFFFFFFFFFFFFFFFFFFFFFFFFFFFFFFFFFFFFFFFFFFFFFFFFFFFFFFFFFFF  
@A00155:342:HHGFNDSXY:1:2262:8386:6183 1:N:0:GAACCTAG+TCCGCATA  
AAGAATTGCTTTGAGAGTCCATCAAGTGATGACGAACTCCCTTGAAGCGACGCCTGAAATTTCCCCAC  
TGCAGTCATCTTCTGCACCGAGAAATAATTCCTAGTCGTGGTGATATTGCTGTCATTCACTCGCAGCA  
+  
FFFFFFFFFFFFFFFFFFFFF,FFFF,FFFFFFFFFFFFFFFFFFFFF:,F,FFFFFFFFFFFFFFFFFFFFF:FFFFFFF  
FFFFFFFFFFFFFFFFFFFFFFFFFFFFFFFFFFFFFFFFFFFFFFFFFFFFFFFFFFFFFFFFFFFFFFFFFFFFF  
@A00155:342:HHGFNDSXY:1:1563:22932:30248 1:N:0:GAACCTAG+TCCGCATA  
AAGAATTGCTTTGAGAGTCCATCAAGTGATGACGAACTCCCTTGAAGCGACGCCTGAAATTTCCCCAC  
TGCAGTCATCTTCTGCACCGAGAAATAATTCCTAGTCGTGGTGATATTGCTGTCATTCACTCGCAGCA  
+  
FFFFFFFFFFFFFFFFFFFFFFFFFFFFFFFFFFFFFFFFFFFFFFFFFFFFFFFFFFFFFFFFFFFFFFFFFFFFF  
FFFFFFFFFFFFFFFFFFFFFFFFFFFFFFFFFFFFFFFFFFFFFFFFFFFFFFFFFFFFFFFFFFFFFFFFFFFFF  
@A00155:342:HHGFNDSXY:1:2422:18295:31297 1:N:0:GAACCTAG+TCCGCATA  
AAGAATTGCTTTGAGAGTCCATCAAGTGATGACGAACTCCCTTGAAGCGACGCCTGAAATTTCCCCAC  
TGCAGTCATCTTCTGCACCGAGAAATAATTCCTAGTCGTGGTGATATTGCTGTCATTCACTCGCAGCA  
+  
FFFFFFFFFFFFFFFFFFFFFFFFFFFFFFFFFFFFFFFFFFFFFFFFFFFFFFFFFFFFFFFFFFFFFFFFFFFFF  
FFFFFFFFFFFFFFFFFFFFFFFFFFFFFFFFFFFFFFFFFFFFFFFFFFFFFFFFFFFFFFFFFFFFFFFFFFFFF  
@A00155:342:HHGFNDSXY:1:1214:11451:26490 1:N:0:GAACCTAG+TCCGCATA  
AAGAATTGCTTTGAGAGTCCATCAAGTGATGACGAACTCCCTTGAAGCGACGCCTGAAATTTCCCCAC  
TGCAGTCATCTTCTGCACCGAGAAATAATTCCTAGTCGTGGTGATATTGCTGTCATTCACTCGCAGCA  
+

```

FFFFFFFFFFFFFFFFFFFFFFFFFFFFFFFFFFFFFFFFFFFFFFFFFFFFFFFFFFFFFFFFFFFFFFFF
FFFFFFFF:FFFFFFFFFFFFFFFFFFFFFFFFFFFFFFFFFFFFFFFFFFFFFFFFFFFFFFFFFFFFFFFF
@A00155:342:HHGFNDSXY:1:1206:14751:8312 1:N:0:GAACCTAG+TCCGCATA
AAGAATTGCTTTGAGAGTCCATCAAGTGATGACGAACTCCCTTGAAGCGACGCCTGAAATTTCCCCAC
TGCAGTCATCTTCTGCACCGAGAAATAATTCCTAGTCGTGGTGATATTGCTGTCATTCACTCGCAGCA
+
FFFFFFFFFFFFFFFFFFFFFFFFFFFFFFFFFFFFFFFFFFFFFFFFFFFFFFFFFFFFFFFFFFFFFFFF
FFFFFFFFFFFFFFFFFFFFFFFFFFFFFFFFFFFFFFFFFFFFFFFFFFFFFFFFFFFFFFFFFFFFFFFF
@A00155:342:HHGFNDSXY:1:1647:7961:14246 1:N:0:GAACCTAG+TCCGCATA
AAGAATTGCTTTGAGAGTCCATCAAGTGATGACGAACTCCCTTGAAGCGACGCCTGAAATTTCCCCAC
TGCAGTCATCTTCTGCACCGAGAAATAATTCCTAGTCGTGGTGATATTGCTGTCATTCACTCGCAGCA
+
FFFFFFFFFFFFFFFFFFFFFFFFFFFFFFFFFFFFFFFFFFFFFFFFFFFFFFFFFFFFFFFFFFFFFFFF
FFFFFFFFFFFFFFFFFFFFFFFFFFFFFFFFFFFFFFFFFFFFFFFFFFFFFFFFFFFFFFFFFFFFFFFF
@A00155:342:HHGFNDSXY:1:1154:29532:3630 1:N:0:GAACCTAG+TCCGCATA
AAGAATTGCTTTGAGAGTCCATCAAGTGATGACGAACTCCCTTGAAGCGACGCCTGAAATTTCCCCAC
TGCAGTCATCTTCTGCACCGAGAAATAATTCCTAGTCGTGGTGATATTGCTGTCATTCACTCGCAGCA
+
F,:FFF:FFFFFFFF:FFFFFF:FFFF,F,FFFFFFFFFFFFF,:FFFF,FFFFFF:FFFF:FFFFFF
FFF:FFFFFF:FF,FFFFFFFF,FF:FFF:,F:FF:FF:FFFFFF:,FFFFFFFFFFFFFFFF:FF
@A00155:342:HHGFNDSXY:1:2566:13847:28855 1:N:0:GAACCTAG+TCCGCATA
AAGAATTGCTTTGAGAGTCCATCAAGTGATGACGAACTCCCTTGAAGCGACGCCTGAAATTTCCCCAC
TGCAGTCATCTTCTGCACCGAGAAATAATTCCTAGTCGTGGTGATATTGCTGTCATTCACTCGCAGCA
+
FFFFFFFFFFFFFFFFFFFFFFFFFFFFFFFFFFFFFFFFFFFFFFFFFFFFFFFFFFFFFFFFFFFFFFFF
FFFFFFFFFFFFFFFFFFFFFFFFFFFFFFFFFFFFFFFFFFFFFFFFFFFFFFFFFFFFFFFFFFFFFFFF
@A00155:342:HHGFNDSXY:1:2534:25961:10066 1:N:0:GAACCTAG+TCCGCATA
AAGAATTGCTTTGAGAGTCCATCAAGTGATGACGAACTCCCTTGAAGCGACGCCTGAAATTTCCCCAC
TGCAGTCATCTTCTGCACCGAGAAATAATTCCTAGTCGTGGTGATATTGCTGTCATTCACTCGCAGCA
+
FFFFFFFFFFFFFFFFFFFFFFFFFFFFFFFFFFFFFFFFFFFFFFFFFFFFFFFFFFFFFFFFFFFFFFFF,FFFF
FFFFFFFFFFFFFFFFFFFFFFFFFFFFFFFFFFFFFFFFFFFFFFFFFFFFFFFFFFFFFFFFFFFFFFFF
@A00155:342:HHGFNDSXY:1:2661:29559:9439 1:N:0:GAACCTAG+TCCGCATA
AAGAATTGCTTTGAGAGTCCATCAAGTGATGACGAACTCCCTTGAAGCGACGCCTGAAATTTCCCCAC
TGCAGTCATCTTCTGCACCGAGAAATAATTCCTAGTCGTGGTGATATTGCTGTCATTCACTCGCAGCA
+
FFFFFFFFFFFFFFFFFFFFFFFFFFFFFFFFFFFFFFFFFFFFFFFFFFFFFFFFFFFFFFFFFFFFFFFF
FFFFFFFFFFFFFFFFFFFFFFFFFFFFFFFFFFFFFFFFFFFFFFFFFFFFFFFFFFFFFFFFFFFFFFFF
@A00155:342:HHGFNDSXY:1:2518:25762:5932 2:N:0:GAACCTAG+TCCGCATA
AGAATTGCTTTGAGAGTCCATCAAGTGATGACGAACTCCCTTGAAGCGACGCCTGAAATTTCCCCACT
GCAGTCATCTTCTGCACCGAGAAATAATTCCTAGTCGTGGTGATATTGCTGTCATTCACTCGCAGCAC
+
FFFF,FF,FFFFFFFFFFFFFFFFFFFFFFFFFFFFFFFFFFFFFFFFFFFFFFFFFFFFFFFFFFFFFFFF
FF:FFFF:FF:FFFFFFFF:FFFFFFFFFFFFFFFFFFFFFFFFFFFFFFFFFFFFFFFF:FFF:FFF:~
@A00155:342:HHGFNDSXY:1:2334:19479:23610 2:N:0:GAACCTAG+TCCGCATA
GAATTGCTTTGAGAGTCCATCAAGTGATGACGAACTCCCTTGAAGCGACGCCTGAAATTTCCCCACTG
CAGTCATCTTCTGCACCGAGAAATAATTCCTAGTCGTGGTGATATTGCTGTCATTCACTCGCAGACC
+
:FFFFFFFF:FFFFFFFFFFFFFFFFFFFFFFFFFFFFFFFFFFFFFFFFFFFFFFFFFFFFFFFFFFFFFFFF
FFFFFF,FFFFFFFFFFFF,FFFFFFFFFFFFFFFFFFFFFFFFFFFFFFFFFFFFFFFFFFFFFFFFFFFF
@A00155:342:HHGFNDSXY:1:2622:17029:16736 1:N:0:GAACCTAG+TCCGCATA
GAATTGCTTTGAGAGTCCATCAAGTGATGACGAACTCCCTTGAAGCGACGCCTGAAATTTCCCCACTG
CAGTCATCTTCTGCACCGAGAAATAATTCCTAGTCGTGGTGATATTGCTGTCATTCACTCGCAGACC
+

```

FFFFFFFFFFFFFFFFFFFFFFFFFFFFFFFFFFFFFFFFFFFFF:FFFFFFFFFFFFFFFFFFFFFFFFFFFFFFFFFFFF  
FFFFFFFFFFFFFFFFFFFFFFFFFFFFFFFFFFFFFFFFFFFFFFF:FFFFFFFFFFFFFFFFFFFF, FFFFFFFF  
@A00155:342:HHGFNDSXY:1:1538:3052:29074 2:N:0:GAACCTAG+TCCGCATA  
GAATTGCTTTGAGAGTCCATCAAGTGATGACGAACTCCCTTGAAGCGACGCTTGAAATTTCCCCACTG  
CAGTCATCTTCTGCACCGAGAAATAATTCCTAGTCGTGGTGATATTGCTGTCATTCACTCGCAGACC  
+  
FFF,F:FFFFFFFFFFFF:F,F:FFF,F:FFF,FFFFFFFF::FFFFFFFFFFFF:FFFFF:FFFFFFFFFFFF  
FFFFFFFFFFFFFFFFFFFFF:FFF,FFFFFFFFFFFFFFFFFFFFFFFFFFFFFFFFFFFFFFFFFFFFFFFFFFFFF  
@A00155:342:HHGFNDSXY:1:2467:20573:2018 1:N:0:GAACCTAG+TCCGCATA  
GAATTGCTTTGAGAGTCCATCAAGTGATGACGAACTCCCTTGAAGCGACGCTTGAAATTTCCCCACTG  
CAGTCATCTTCTGCACCGAGAAATAATTCCTAGTCGTGGTGATATTGCTGTCATTCACTCGCAGACC  
+  
FFFFFFFFFFFFFFFFFFFFFFFFFFFFFFFFFFFFFFFFFFFFFFFFFFFFFFFFFFFFFFFFFFFFFFFFFFFFF  
FFFFFFFFFFFFFFFFFFFFFFFFFFFFF:FFFFFFFFFFFFFFFFFFFFFFFFFFFFFFFFFFFFFFFFFFFFFFFFFFFFF  
@A00155:342:HHGFNDSXY:1:1148:30255:21887 2:N:0:GAACCTAG+TCCGCATA  
GAATTGCTTTGAGAGTCCATCAAGTGATGACGAACTCCCTTGAAGCGACGCTTGAAATTTCCCCACTG  
CAGTCATCTTCTGCACCGAGAAATAATTCCTAGTCGTGGTGATATTGCTGTCATTCACTCGCAGACC  
+  
F:FFFFFFFFFFFFF:FFFFFFFFFF,FFFFFFFFFFFFFFFFFFFFF:FFFFFFFFF:FFFFFFFFFF:FFFFFFFFF  
FFFFFFFFFFFFFFFFFFFFFFFFFFFFFFFFFFFFFFFFFFFFFFFFFFFFF:FFFFFFFFFFFFFFFFFFFFFFFFFFFFF  
@A00155:342:HHGFNDSXY:1:2346:30581:8202 1:N:0:GAACCTAG+TCCGCATA  
GAATTGCTTTAAGAGTCCATCAAGTGATGACGAACTCCCTTGAAGCGACGCTTGAAATTTCCCCACTG  
CAGTCATCTTCTGCACCGAGAAATAATTCCTAGTCGTGGTGATATTGCTGTCATTCACTCGCAGACC  
+  
FFFFFFFFFFFFFFFFFFFFFFFFFFFFFFFFFFFFFFFFFFFFFFFFFFFFFFFFFFFFFFFFFFFFFFFFFFFFF  
FFFFFFFFFFFFFFFFFFFFFFFFFFFFFFFFFFFFFFFFFFFFF,FFFFFFFFFFFFFFFFFFFFFFFFFFFFFFFFFFFF  
@A00155:342:HHGFNDSXY:1:2256:30183:35258 2:N:0:GAACCTAG+TCCGCATA  
GAATTGCTTTGAGAGTCCATCAAGTGATGACGAACTCCCTTGAAGCGACGCTTGAAATTTCCCCACTG  
CAGTCATCTTCTGCACCGAGAAATAATTCCTAGTCGTGGTGATATTGCTGTCATTCACTCGCAGACC  
+  
FF,:FFFF:FFFFFFFFFFFFFFFFF:,FFFFFFFFF,FFFFF,:FF:FFF:FFFF:F::F,,::FFFFFFFF:F  
FFFFFFFFFFFFF,FFFFFFFFFF:FFFFFFFFFFFFFFFFFFFFFFFFFFFFF:FFFFFFFFFFFFFFFFFFFFFFFFFFFFF  
@A00155:342:HHGFNDSXY:1:1126:6153:17190 1:N:0:GAACCTAG+TCCGCATA  
GAATTGCTTTGAGAGTCCATCAAGTGATGACGAACTCCCTTGAAGCGACGCTTGAAATTTCCCCACTG  
CAGTCATCTTCTGCACCGAGAAATAATTCCTAGTCGTGGTGATATTGCTGTCATTCACTCGCAGACC  
+  
FFFF:FFFFFFFFFFFFFFFFFFFFFFFFFFFFFFFFFFFFF:FFFFFFFFFFFFFFFFFFFFFFFFFFFFFFFFFFFFF  
FFFFFFFFFFFFFFFFFFFFFFFFFFFFFFFFFFFFF:FFFFFFFFFFFFF:FFFFFFFFFFFFFFFFFF,FFFFFFFFFFFFFFFFF  
@A00155:342:HHGFNDSXY:1:1345:13259:12618 2:N:0:GAACCTAG+TCCGCATA  
GAATTGCTTTGAGAGTCCATCAAGTGATGACGAACTCCCTTGAAGCGACGCTTGAAATTTCCCCACTG  
CAGTCATCTTCTGCACCGAGAAATAATTCCTAGTCGTGGTGATATTGCTGTCATTCACTCGCAGACC  
+  
FFFFFFFFFFFFFFFFFFFFFFFFFFFFFFFFFFFFFFFFFFFFFFFFFFFFFFFFFFFFFFFFFFFFFFFFFFFFF  
FFFF:FFFFFFFFFFFFFFFFFFFFFFFFFFFFFFFFFFFFFFFFFFFFFFFFFFFFFFFFFFFFFFFFFFFFFFFFFFFFF  
@A00155:342:HHGFNDSXY:1:2216:5665:1846 2:N:0:GAACCTAG+TCCGCATA  
AATTGCTTTGAGAGTCCATCAAGTGATGACGAACTCCCTTGAAGCGACGCTTGAAATTTCCCCACTGC  
AGTCATCTTCTGCACCGAGAAATAATTCCTAGTCGTGGTGATATTGCTGTCATTCACTCGCAGACCC  
+  
FF,:F:, :FFFFFFFFFFFFFFFFF, :FFFFFFFFFFFFFFFFFFFF, :FFFFFFFFFFFFFFFFFFFFFFFFFFFFF:FF  
FFFF, :F:FFFFFFFFFFFFFFFFFFFFFFFFFFFFFFFFFFFFFFFFFFFFFFFFFFFFFFFFFFFFFFFFFFFFF  
@A00155:342:HHGFNDSXY:1:1278:32054:36464 2:N:0:GAACCTAG+TCCGCATA  
AATTGCTTTGAGAGTCCATCACGTGATGACGAACTCCCTTGAAGCGACGCTTGAAATTTCCCCACTGC  
AGTCATCTTCTGCACCGAGAAATAATTCCTAGTCGTGGTGATATTGCTGTCATTCACTCGCAGACCCC

F,FFFFF:FFFFFFFFFFFFFF,F,:FFFFFFF:FFFFFFFFFFFFFFF:FFF:::FFFFFFFF,F  
FFFF:FF,FFFF:FFFF:FFFFFFFFFFFFFFF:FFFFFFFFFFFFFFF:FFFFFFFFFFFFFFF  
@A00155:342:HHGFNDSXY:1:2348:22218:33990 1:N:0:GAACCTAG+TCCGCATA  
ATTGCTTTGAGAGTCCATCAAGTGATGACGAACTCCCTTGAAGCGACGCCTGAAATTTCCCCACTGCA  
GTCATCTTCTGCACCGAGAAATAATTCCTAGTCGTGGTGATATTGCTGTCATTCACTCGCAGACCCCC  
+  
FFFFFFFFFFFFFFFFFFFFFFFFFFFFFFFFFFFFFFFF,FFFFFFFFFFFFFFFFFFFFFFFFFFFFFFFF  
FFFFFFFFFFFFFFFFFFFFFFFF:FFFFFFFFFFFFFFFFFFFFFFFFFFFFFFFFFFFFFFFFFFFFFFFF  
@A00155:342:HHGFNDSXY:1:2337:29017:22310 1:N:0:GAACCTAG+TCCGCATA  
ATTGCTTTGAGAGTCCATCAAGTGATGACGAACTCCCTTGAAGCGACGCCTGAAATTTCCCCACTGCA  
GTCATCTTCTGCACCGAGAAATAATTCCTAGTCGTGGTGATATTGCTGTCATTCACTCGCAGACCCCC  
+  
FFFFFFFFFFFFFFF,FFFFFFFFFFFFFFFFF:FFFFF:F:FFFFFFFFF:FFFFFFFFFFFFFFFFFFFFF  
F:F:::FFF:FFFFFFFFFFFFFFFFF:F:FFFFFFFFFFFFFFFFFFFFFFFFFFFFFFFFFFFFFFFF  
@A00155:342:HHGFNDSXY:1:2204:31159:17816 2:N:0:GAACCTAG+TCCGCATA  
ATTGCTTTGAGAGTCCATCAAGTGATGACGAACTCCCTTGAAGCGACGCCTGAAATTTCCCCACTGCA  
GTCATCTTCTGCACCGAGAAATAATTCCTAGTCGTGGTGATATTGCTGTCATTCACTCGCAGACCCCC  
+  
F,FFFFFFFFFFFFFFFFF:FFFFFFFFF:FFFFFFFFFFFFFFFFFFFFFFFFFFFFFFFFFFFFFFFF  
FFFFFFFFFFFFFFFFFFFFFFFFFFFFFFFFFFFFFFFFFFFFFFFFFFFFFFFFFFFFFFFF:FFFFFFFFFFFFFFF  
@A00155:342:HHGFNDSXY:1:1464:26268:5274 1:N:0:GAACCTAG+TCCGCATA  
TTGCTTTGAGAGTCCATCAAGTGATGACGAACTCCCTTGAAGCGACGCCTGAAATTTCCCCACTGCAG  
TCATCTTCTGCACCGAGAAATAATTCCTAGTCGTGGTGATATTGCTGTCATTCACTCGCAG  
+  
FFFFFFFFFFFFFFFFFFFFFFFFFFFFFFFFFFFFFFFFFFFFFFFFFFFFFFFFFFFFFFFFFFFFFFFF  
FFFFFFFFFFFFFFFFFFFFFFFFFFFFFFFF:FFFFFFFFFFFFFFF,FFFFFFFFFFFFFFFFFFFFFFFF  
@A00155:342:HHGFNDSXY:1:1338:26359:26412 1:N:0:GAACCTAG+TCCGCATA  
TTGCTTTGAGAGTCCATCAAGTGATGACGAACTCCCTTGAAGCGACGCCTGAAATTTCCCCACTGCAG  
TCATCTTCTGCACCGAGAAATAATTCCTAGTCGTGGTGATATTGCTGTCATTCACTCGCAGACCCC  
+  
FFFFFFFFFFFFFFFFFFFFFFFFFFFFFFFFFFFFFFFFFFFFFFFFFFFFFFFFFFFFFFFFFFFFFFFF  
FFFFFFFFFFFFFFFFFFFFFFFFFFFFFFFFFFFFFFFFFFFFFFFFFFFFFFFFFFFFFFFFFFFFFFFF  
@A00155:342:HHGFNDSXY:1:1662:1271:24956 1:N:0:GAACCTAG+TCCGCATA  
TTGCTTTGAGAGTCCATCAAGTGATGACGAACTCCCTTGAAGCGACGCCTGAAATTTCCCCACTGCAG  
TCATCTTCTGCACTGAGAAATAATTCCTAGTCGTGGTGATATTGCTGTCATTCACTCGCAGACCCCC  
+  
FFFF:FFFFFFFF::FFFFFFFFFFFFFF,FF:FFF,F:FFFF:FFFFFFFFF:FFFFFFFFFFFFFFF,F  
FFFFFFFFFFFFFFF:,FFFFFF,FF:FFFFFFF:FF:FFF,:FFFFFFFFF,FFFFFFFF:FFFFFFF  
@A00155:342:HHGFNDSXY:1:1352:31611:18004 1:N:0:GAACCTAG+TCCGCATA  
TTGCTTTGAGAGTCCATCAAGTGATGACGAACTCCCTTGAAGCGACGCCTGAAATTTCCCCACTGCAG  
TCATCTTCTGCACCGAGAAATAATTCCTAGTCGTGGTGATATTGCTGTCATTCACTCGCAGACCCCCA  
+  
FFFFFFFFFFFFFFFFFFFFFFFFFFFFFFFFFFFFFFFFFFFFFFFFFFFFFFFFFFFFFFFF:FFFFFFFFFFFFFFF  
FFFFFFFFFFFFFFFFFFFFFFFFFFFFFFFFFFFFFFFF,FFFFFFFFFFFFFFFFFFFFFFFF:FFFFFFFFFFFFFFF  
@A00155:342:HHGFNDSXY:1:1201:8440:10755 1:N:0:GAACCTAG+TCCGCATA  
TTGCTTTGAGAGTCCATCAAGTGATGACGAACTCCCTTGAAGCGACGCCTGAAATTTCCCCACTGCAG  
TCATCTTCTGCACCGAGAAATAATTCCTAGTCGTGGTGATATTGCTGTCATTCACTCGCAGACCCCCA  
+  
FFFFFFFFFFFFFFFFFFFFFFFFFFFFFFFFFFFFFFFF:FFFFFFFFFFFFFFFFFFFFFFFFFFFFFFFF  
FFFFFFFFFFFFFFFFFFFFFFFFFFFFFFFFFFFFFFFF:FFFFFFFFFFFFFFFFFFFFFFFFFFFFFFFF  
@A00155:342:HHGFNDSXY:1:1104:25925:20087 1:N:0:GAACCTAG+TCCGCATA  
TTGCTTTGAGAGTCCATCAAGTGATGACGAACTCCCTTGAAGCGACGCCTGAAATTTCCCCACTGCAG  
TCATCTTCTGCACTGAGAAATAATTCCTAGTCGTGGTGATATTGCTGTCATTCACTCGCAGACCCCCA  
+

F:FFFF,FFFFF:FFFFF,FF:FF:FFFFF::FFFFF:F,FFF:,FF  
F:FFFF,FFFFF:FFFFF,FFFFF:F::FF:FF:FFFFF,FFFF:FFFF::F:FFFF  
@A00155:342:HHGFNDSXY:1:2104:27010:15546 1:N:0:GAACCTAG+TCCGCATA  
TTGCTTTGAGAGTCCATCAAGTGATGACGAACTCCCTTGAAGCGACGCCTGAAATTTCCCCACTGCAG  
TCATCTTCTGCACTGAGAAATAATTCTAGTCGTGGTGATATTGCTGTCATTCACTCGCAGCACCCCA  
+  
FFFFFFFFFFFFFFFF:FFFFFFFFFFFFFFFFFFFFFFFFFFFFFFFFFFFFFFFFFFFFFFFFFFFFFFFFFFFFFFFF  
FFFFFFFFFFFFFFFFFFFFFFFFFFFFFFFFFFFFFFFFFFFFFFFFFFFFFFFFFFFFFFFFFFFFFFFFFFFFFFFF  
@A00155:342:HHGFNDSXY:1:2330:13521:35712 1:N:0:GAACCTAG+TCCGCATA  
TTGCTTTGAGAGTCCATCAAGTGATGACGAACTCCCTTGAAGCGACGCCTGAAATTTCCCCACTGCAG  
TCATCTTCTGCACCGAGAAATAATTCTAGTCGTGGTGATATTGCTGTCATTCACTCGCAGCACCCCA  
+  
FFFFFFFFFFFFFFFFFFFFFFFFFFFFFFFFFFFFFFFFFFFFFFFFFFFFFFFFFFFFFFFFFFFFFFFFFFFFFFFF  
FFFFFFFFFFFFFFFFFFFFFFFFFFFFFFFFFFFFFFFFFFFFFFFFFFFFFFFFFFFFFFFFFFFFFFFFFFFFFFFF  
@A00155:342:HHGFNDSXY:1:2514:29008:3255 1:N:0:GAACCTAG+TCCGCATA  
TTGCTTTGAGAGTCCATCAAGTGATGACGAACTCCCTTGAAGCGACGCCTGAAATTTCCCCACTGCAG  
TCATCTTCTGCACCGAGAAATAATTCTAGTCGTGGTGATATTGCTGTCATTCACTCGCAGCACCCCA  
+  
FFFFFFFFFFFFFFF:FFFFFFFFFFFFFFFFFFFFFFFFFFFFFFFFFFFFFFFFFFFFFFFFFFFFFFFFFFFFFFFF  
FFFFFFFFFFFFFFFFFFFFFFFFFFFFFFFFFFFFFFFFFFFFFFFFFFFFFFFFFFFFFFFFFFFFFFFFFFFFFFFF  
@A00155:342:HHGFNDSXY:1:2131:12798:15671 1:N:0:GAACCTAG+TCCGCATA  
TTGCTTTGAGAGTCCATCAAGTGATGACGAACTCCCTTGAAGCGACGCCTGAAATTTCCCCACTGCAG  
TCATCTTCTGCACCGAGAAATAATTCTAGTCGTGGTGATATTGCTGTCATTCACTCGCAGCACCCCA  
+  
FFFFFFFFFFFFFFFFFFFFFFFFFFFFFFFFFFFFFFFFFFFFFFFFFFFFFFFFFFFFFFFFFFFFFFFFFFFFFFFF  
FFFFFFFFFFFFFFFFFFFFFFFFFFFFFFFFFFFFFFFFFFFFFFFFFFFFFFFFFFFFFFFFFFFFFFFFFFFFFFFF  
@A00155:342:HHGFNDSXY:1:1345:13259:12618 1:N:0:GAACCTAG+TCCGCATA  
TTGCTTTGAGAGTCCATCAAGTGATGACGAACTCCCTTGAAGCGACGCCTGAAATTTCCCCACTGCAG  
TCATCTTCTGCACCGAGAAATAATTCTAGTCGTGGTGATATTGCTGTCATTCACTCGCAGCACCCCA  
+  
F:FFFFFFFFFFFFFFFFFFFFFFFFFFFFFFFFFFFFFFFFFFFFFFFFFFFFFFFFFFFFFFFF:FFF:FFFF  
FFFFFFFFFFFFFFFFFFFFFFFFFFFFFFFFFFFFFFFFFFFFFFFFFFFFFFFFFFFFFFFF:FFFFFFFFF  
@A00155:342:HHGFNDSXY:1:2457:24966:15953 1:N:0:GAACCTAG+TCCGCATA  
TTGCTTTGAGAGTCCATCAAGTGATGACGAACTCCCTTGAAGCGACGCCTGAAATTTCCCCACTGCAG  
TCATCTTCTGCACCGAGAAATAATTCTAGTCGTGGTGATATTGCTGTCATTCACTCGCAGCACCCCA  
+  
FFFFFFFFFFFFFFFFFFFFFFFFFFFFFFFFFFFFFFFFFFFFFFFFFFFFFFFFFFFFFFFFFFFFFFFFFFFFFFFF  
FFFFFFFFFFFFFFFFFFFFFFFFFFFFFFFFFFFFFFFFFFFFFFFFFFFFFFFFFFFFFFFFFFFFFFFFFFFFFFFF  
@A00155:342:HHGFNDSXY:1:1402:1759:6605 1:N:0:GAACCTAG+TCCGCATA  
TTGCTTTGAGAGTCCATCAAGTGATGACGAACTCCCTTGAAGCGACGCCTGAAATTTCCCCACTGCAG  
TCATCTTCTGCACCGAGAAATAATTCTAGTCGTGGTGATATTGCTGTCATTCACTCGCAGCACCCCA  
+  
FFFFFFFFFFFFFFFFFFFFFFFFFFFFFFFFFFFFFFFFFFFFFFFFFFFFFFFFFFFFFFFFFFFFFFFFFFFFFFFF  
FFFFFFFFFFFFFFFFFFFFFFFFFFFFFFFFFFFFFFFFFFFFFFFFFFFFFFFFFFFFFFFFFFFFFFFFFFFFFFFF  
@A00155:342:HHGFNDSXY:1:2469:20419:11553 1:N:0:GAACCTAG+TCCGCATA  
TTGCTTTGAGAGTCCATCAAGTGATGACGAACTCCCTTGAAGCGACGCCTGAAATTTCCCCACTGCAG  
TCATCTTCTGCACCGAGAAATAATTCTAGTCGTGGTGATATTGCTGTCATTCACTCGCAGCACCCCA  
+  
FFFFFFFFFFFFFFFFFFFFFFFFFFFFFFFFFFFFFFFFFFFFFFFFFFFFFFFFFFFFFFFFFFFFFFFFFFFFFFFF  
FFFFF:FFFFFFFFFFFFFFFFFFFFFFFFFFFFFFFFFFFFFFFFFFFFFFFFFFFFFFFFFFFFFFFF:FFFF,FFFF  
@A00155:342:HHGFNDSXY:1:1263:31421:7404 1:N:0:GAACCTAG+TCCGCATA  
TTGCTTTGAGAGTCCATCAAGTGATGACGAACTCCCTTGAAGCGACGCCTGAAATTTCCCCACTGCAG  
TCATCTTCTGCACCGAGAAATAATTCTAGTCGTGGTGATATTGCTGTCATTCACTCGCAGCACCCCA  
+

FFFFFFFFFFFFFFFFFFFFFFFFFFFFFFFFFFFFFFFFFFFFFFFFFFFFFFFFFFFFFFFFFFFFFFFF  
FFFFFFFFFFFFFFFFFFFFFFFFFFFFFFFFFFFFFFFFFFFFFFFFFFFFFFFFFFFFFFFFFFFFFFFF  
@A00155:342:HHGFNDSXY:1:1370:19804:24987 2:N:0:GAACCTAG+TCCGCATA  
TGCTTTGAGAGTCCATCAAGTGATGACGAACTCCCTTGAAGCGACGCCTGAAATTTCCCCACTGCAGT  
CATCGTCTGCACCGAGAAATAATTCCTAGTCGTGGTGATATTGCTGTCATTCACTCGCAGCACCCCAC  
+  
FFFFFFFFFFFFFFFFFFFFFFFF: , FFFFFFFFF, F, FFFF: FF, FFFFFFFFF: FFF: FFFFF: FFFFFFFFF  
FFFF, FFFFFFFFFFFFFFFFFFFFFFFFFFFFFFFFFFFFFFFFFFFFFFFFFFFFFFFFFFFFFFFFF: FFFFFFFFFFFFFFFFF  
@A00155:342:HHGFNDSXY:1:2144:6958:8093 2:N:0:GAACCTAG+TCCGCATA  
CTTTGAGAGTCCATCAAGTGATGACGAACTCACTTGAAGCGACGCCTGAAATTTCCCCACTGCAGTCA  
TCTTCTGCACCGAGAAATAATTCCTAGTCGTGGTGATATTGCTGTCATTCACTCGCAGCACCCC  
+  
FFFFFFFFFFFFFFFFFFFFFFFFFFFFFFFFFFFFFFFFFFFFFFFFFFFFFFFFFFFFFFFFFFFFFFFF  
FFFFFFFFFFFFFFFFFFFFFFFFFFFFFFFFFFFFFFFFFFFFFFFFFFFFFFFFFFFFFFFFFFFFFFFF  
@A00155:342:HHGFNDSXY:1:2247:11831:17253 2:N:0:GAACCTAG+TCCGCATA  
CTTTGAGAGTCCATCAAGTGATGACGAACTCACTTGAAGCGACGCCTGAAATTTCCCCACTGCAGTCA  
TCTTCTGCACCGAGAAATAATTCCTAGTCGTGGTGATATTGCTGTCATTCACTCGCAGCACCCC  
+  
FFFFFFFFFFFFFFFFFFFFFFFFFFFFFFFFFFFFFFFFFFFFFFFFFFFFFFFFFFFFFFFFFFFFFFFF  
FFFFFFFFFFFFFFFFFFFFFFFFFFFFFFFFFFFFFFFFFFFFFFFFFFFFFFFFFFFFFFFFFFFFFFFF  
@A00155:342:HHGFNDSXY:1:2247:11541:17722 2:N:0:GAACCTAG+TCCGCATA  
CTTTGAGAGTCCATCAAGTGATGACGAACTCACTTGAAGCGACGCCTGAAATTTCCCCACTGCAGTCA  
TCTTCTGCACCGAGAAATAATTCCTAGTCGTGGTGATATTGCTGTCATTCACTCGCAGCACCCC  
+  
FFFFFFFFFFFFFFFFFFFFFFFFFFFFFFFFFFFFFFFFFFFFFFFFFFFFFFFFFFFFFFFFFFFFFFFF  
FFFFFFFFFFFFFFFFFFFFFFFFFFFFFFFFFFFFFFFFFFFFFFFFFFFFFFFFFFFFFFFFFFFFFFFF  
@A00155:342:HHGFNDSXY:1:2146:28673:27258 2:N:0:GAACCTAG+TCCGCATA  
TTGAGAGTCCATCAAGTGATGACGAACTCCCTTGAAGCGACGCCTGAAATTTCCCCACTGCAGTCATC  
TTCTGCACCGAGAAATAATTCCTAGTCGTGGTGATATTGCTGTCATTCACTCGCAGCACCCCACCAT  
+  
FFFFFFFFFFFFFFFFFFFF, FF: FFFFFFF: :: FFFFF, : FFFFFFFFF: F, FFFFFFFFF: FF:  
F: FFF: F: :: FFFFFFFFFFFFFFFFFFFFFFFFF: FFF: : FFF: FF: FFFF: F, FF, FF: FFF: FFF: FFF  
@A00155:342:HHGFNDSXY:1:1555:21151:17237 2:N:0:GAACCTAG+TCCGCATA  
TGAGAGTCCATCAAGTGATGACGAACTCCCTTGAAGCGACGCCTGAAATTTCCCCACTGCAGTCATCT  
TCTGCACCGAGAAATAATTCCTAGTCGTGGTGATATTGCTGTCATTCACTCGCAGCACCCCACCATGG  
+  
FFFFFFFFFFFF: FFFFFFFFFFFFFFFFFFFFFFFFF: FFFFFFFFFFFFF: FFFFF, FFFF: FFF, FFF: FFFFF  
FFFFFFFFFFFFFFFFFFFFFFFFFFFFFFFFFFFFFFFFFFFFFFFFFFFFFFFFFFFFFFFFFFFFFFFF  
@A00155:342:HHGFNDSXY:1:1555:20112:16814 2:N:0:GAACCTAG+TCCGCATA  
TGAGAGTCCATCAAGTGATGACGAACTCCCTTGAAGCGACGCCTGAAATTTCCCCACTGCAGTCATCT  
TCTGCACCGAGAAATAATTCCTAGTCGTGGTGATATTGCTGTCATTCACTCGCAGCACCCCACCATGG  
+  
FFFFFFFFFFFF: FFFFF, FFFFFFFFFFFFFFFFF: : FFFFFFFFFFFFFFFFF: FFFFFFFFF: FFF: FF: FFF  
FFFFFFFFFFFFFFFFFFFFFFFFFFFFFFFFFFFFFFFFFFFFFFFF: FFFFFFFFF, FFFFFFFFF: FFFFFFFFFFFFF  
@A00155:342:HHGFNDSXY:1:2147:3613:21245 1:N:0:GAACCTAG+TCCGCATA  
GTCCATCAAGTGATGACGAACTCCCTTGAAGCGACGCCTGAAATTTCCCCACTGCAGTCATCTTCTGC  
ACCGAGAAATAATTCCTAGTCGTGGTGATATTGCTGTCATTCACTCGCAGCACCCCACCATG  
+  
FFFFFFFFFFFF: FFFFFFFFF: FFFFFFFFFFFFFFFFF: FFFFFFFFFFFFFFFFFFFFFFFFFFFFFFFFF  
FFFFFFFFFFFFFFFFFFFFFFFFFFFFFFFFFFFFFFFFFFFFFFFFFFFFFFFFFFFFFFFFFFFFFFFF: F  
@A00155:342:HHGFNDSXY:1:2263:31060:24940 2:N:0:GAACCTAG+TCCGCATA  
CCATCAAGTGATGACGAACTCCCTTGAAGCGACGCCTGAAATTTCCCCACTGCAGTCATCTTCTGCAC  
CGAGAAATAATTCCTAGTCGTGGTGATATTGCTGTCATTCACTCGCAGCACCCCACCATGGTACGTGC  
+

FFFFFFFFFFFFFFFFFFFFFFFFFFFFFFFFFFFFFFFFFFFFFFFFFFFFFFFFFFFFFFFFFFFFF:  
FFFFFFFFFFFFFFFFFFFFFFFFFFFFFFFFFFFFFFFFFFFFFFFFFFFFFFFFFFFFFFFFFFFFFF  
@A00155:342:HHGFNDSXY:1:2263:31087:24956 2:N:0:GAACCTAG+TCCGCATA  
CCATCAAGTGATGACGAAGTCCCTTTGAAGCGACGCCTGAAATTTCCCCACTGCAGTCATCTTCTGCAC  
CGAGAAATAATTCTTAGTCGTGGTGATATTGCTGTCATTCACTCGCAGCACCCCACCATGGTACGTGC  
+  
FFFFFFFFFFFFFFFFFFFFFFFFFFFFFFFFFFFFFFFF:F:FFFFFFFFFFFFFFFFFFFFFFFF  
FFFFFFFFFFFFFFFFFFFFFFFFFFFFFFFFFFFFFFFFFFFFFFFFFFFFFFFFFFFFFFFFFFFFF:  
@A00155:342:HHGFNDSXY:1:2415:32868:22153 2:N:0:GAACCTAG+TCCGCATA  
CCATCAAGTGATGACGAAGTCCCTTTGAAGCGACGCCTGAAATTTCCCCACTGCAGTCATCTTCTGCAC  
CGAGAAATAATTCTTAGTCGTGGTGATATTGCTGTCATTCACTCGCAGCACCCCACCATGGTACGTGC  
+  
FFFFFFF::FFFFFFFFFFFFFFFFFFFFFFFFFFFFFFFFFFFFFFFFFFFFFFFFFFFFFFFFFF:  
FFF:FFFFFF,F,FFFFFFFFFFFFFFFFFFFFFFFFFFFFFFFFFFFFFFFFFFFFFFFFFFFFF:FF  
@A00155:342:HHGFNDSXY:1:1169:9525:33489 2:N:0:GAACCTAG+TCCGCATA  
CATCAAGTGATGACGAAGTCCCTTTGAAGCGACGCCTGAAATTTCCCCACTGCAGTCATCTTCTGCACC  
GAGAAATAATTCCTAGTCGTGGTGATATTGCTGTCATTCACTCGCAGCACCCCACCATGGTACGTGCT  
+  
FFFF:F::FF:FFFFFFFFF::FFFFFFFFFFFFFFFFFFFFFFFFFFFFFFFFFFFFFFFFFFFFF:  
FFFFFFFFFFFFFFFFFFFFFFFFFFFFFFFFFFFFFFFFFFFFFFFFFFFFFFFFFFFFFFFFFFFFFFF:  
@A00155:342:HHGFNDSXY:1:1142:24370:16924 2:N:0:GAACCTAG+TCCGCATA  
CATCAAGTGATGACGAAGTCCCTTTGAAGCGACGCCTGAAATTTCCCCACTGCAGTCATCTTCTGCACC  
GAGAAATAATTCCTAGTCGTGGTGATATTGCTGTCATTCACTCGCAGCACCCCACCATGGTACGTGCT  
+  
F,FF:FFFF,F,:FFFFFFFFF::FFFFFFFFF:FFFFFFFFFFFFFFFFFFFFF:,F:,,,FF:FFFFFFF:  
FFFFFFFFFFFFFFFFFFFFFFFFFFFFFFFFFFFFFFFFFFFFFFFFFFFFFFFFFFFFFFFFFFFFFFF:  
@A00155:342:HHGFNDSXY:1:2246:14507:5259 2:N:0:GAACCTAG+TCCGCATA  
CATCAAGTGAGGACGAAGTCCCTTTGAAGCGACGCCTGAAATTTCCCCACTGCAGTCATCTTCTGCACC  
GAGAAATAATTCCTAGTCGTGGTGATATTGCTGTCATTCACTCGCAGCACCCCACCATGGTACGTGCT  
+  
F:FFF,F:FF,FFFF,FFFFF:,FFFFFFFFFFFF,F,FF:,FF:FF,FFFFFFFF,F:F:FFFFFFF  
F,FFFFFFFFFFFFFFFFFFFFFFFFFFFFFFFFFFFFFFFFFFFFFFFFFFFFFFFFFFFFFFFFFFFFF:  
@A00155:342:HHGFNDSXY:1:2246:13865:2362 2:N:0:GAACCTAG+TCCGCATA  
CATCAAGTGATGACGAAGTCCCTTTGAAGCGACGCCTGAAATTTCCCCACTGCAGTCATCTTCTGCACC  
GAGAAATAATTCCTAGTCGTGGTGATATTGCTGTCATTCACTCGCAGCACCCCACCATGGTACGTGCT  
+  
FF,FFFFFFFFFFFFFFFFFFFFFFFFFFFFFFFFFFFFFFFFFFFFFFFFFFFFFFFFFFFFFFFFFFFFF,  
FFFFFFFFFFFFFFFFFFFFFFFFFFFFFFFFFFFFFFFFFFFFFFFFFFFFFFFFFFFFFFFFFFFFFFFFF  
@A00155:342:HHGFNDSXY:1:1317:1877:28072 2:N:0:GAACCTAG+TCCGCATA  
TCAAGTGATGACGAAGTCCCTTTGAAGCGACGCCTGAAATTTCCCCACTGCAGTCATCTTCTGCACCGA  
GAAATAATTCCTAGTCGTGGTGATATTGCTGTCATTCACTCGCAGCACCCCACCATGGTACGTGCTAT  
+  
FFFFFFFFFFFFFFFFFFFFFFFFFFFFFFFFFFFFFFFFFFFFFFFFFFFFFFFFFFFFFFFFFFFFF:  
FFFFFFFFFFFFF:,FFFFFFFFFFFFF:FFFFFFFFFFFFFFFFFFFFFFFFFFFFFFFFFFFFFFFFF:  
@A00155:342:HHGFNDSXY:1:2436:13575:16360 2:N:0:GAACCTAG+TCCGCATA  
TCAAGTGATGACGAAGTCCCTTTGAAGCGACGCCTGAAATTTCCCCACTGCAGTCATCTTCTGCACCGA  
GAAATAATTCCTAGTCGTGGTGATATTGCTGTCATTCACTCGCAGCACCCCACCATGGTACGTGCTAT  
+  
FFFFFFFFFFFFFFFFFFFFFFFFFFFFFFFFFFFFFFFFFFFFFFFFFFFFFFFFFFFFFFFFFFFFF  
FFFFFFFFFFFFFFFFF:FFFFFFFFFFFFFFFFFFFFFFFFFFFFFFFFFFFFFFFFFFFFFFFFFFFFF:  
@A00155:342:HHGFNDSXY:1:2247:11831:17253 1:N:0:GAACCTAG+TCCGCATA  
AAGTGATGACGAAGTCACTTGAAGCGACGCCTGAAATTTCCCCACTGCAGTCATCTTCTGCACCGAGA  
AATAATTCCTAGTCGTGGTGATATTGCTGTCATTCACTCGCAGCACCCCACCATGGTACGTGCT

FFFFFFFF:FFFFFFFFFFFFFFFFFFFFFFFFFFFFFFFFFFFFFFFFFFFFFFFFFFFFFFFFFFFFFFFF  
:FFFFFFFFFFFFFFFFFFFFFFFFFFFFFFFFFFFFFFFFFFFFFFFFFFFFFFFFFFFFFFFFFFFFFFFF  
@A00155:342:HHGFNDSXY:1:2144:6958:8093 1:N:0:GAACCTAG+TCCGCATA  
AAGTGATGACGAACCTCACTTGAAGCGACGCCTGAAATTTCCCCACTGCAGTCATCTTCTGCACCGAGA  
AATAATTCCTAGTCGTGGTGATATTGCTGTCATTCACTCGCAGCACCCCACCATGGTACGTGCT  
+  
FFFFFFFFFFFFFFFFFFFFFFFFFFFFFFFFFFFFFFFFFFFFFFFFFFFFFFFFFFFFFFFFFFFFFFFF  
:FFFFFFFFFFFFFFFFFFFFFFFF:FFFFFFFFFFFFFFFFFFFFFFFFFFFFFFFFFFFFFFFFFFFFFFFF  
@A00155:342:HHGFNDSXY:1:2247:11541:17722 1:N:0:GAACCTAG+TCCGCATA  
AAGTGATGACGAACCTCACTTGAAGCGACGCCTGAAATTTCCCCACTGCAGTCATCTTCTGCACCGAGA  
AATAATTCCTAGTCGTGGTGATATTGCTGTCATTCACTCGCAGCACCCCACCATGGTACGTGCT  
+  
FFFFFFFFFFFFFFFFFFFFFFFFFFFFFFFFFFFFFFFFFFFFFFFFFFFFFFFFFFFFFFFFFFFFFFFF,FFFFFFFFFFFFFFFF  
FFFFFFFFFFFFFFFFFFFFFFFF:FFFFFFFFFFFFFFFFFFFFFFFFFFFFFFFFFFFFFFFFFFFFFFFF  
@A00155:342:HHGFNDSXY:1:1461:30138:36025 2:N:0:GAACCTAG+TCCGCATA  
AAGTGATGACGAACCTCCCTTGAAGCGACGCCTGAAATTTCCCCACTGCAGTCATCTTCTGCACCGAGA  
AATAATTCCTAGTCGTGGTGATATTGCTGTCATTCACTCGCAGCACCCCACCATGGTACGTGCTATGC  
+  
FFFFFFFFFFFFFFFFFFFFFFFF: ,FFFF:FFF:FFFFFFFFFFFFFFFF,FFFFFFFF:FFFFFFFF  
FFFFFFFFFFFFFFFFFFFFFFFFFFFFFFFFFFFFFFFFFFFFFFFFFFFFFFFFFFFFFFFFFFFFFFFF  
@A00155:342:HHGFNDSXY:1:1317:1877:28072 1:N:0:GAACCTAG+TCCGCATA  
TGATGACGAACCTCCCTTGAAGCGACGCCTGAAATTTCCCCACTGCAGTCATCTTCTGCACCGAGAAAT  
AATTCCTAGTCGTGGTGATATTGCTGTCATTCACTCGCAGCACCCCACCATGGTACGTGCTATGCCTT  
+  
FFFFFFFFFFFFFFFFFFFFFFFFFFFFFFFFFFFFFFFFFFFFFFFF:FFFFFF:FFFFFFFFFFFFFFFF  
FFFFFFFFFFFFFFFFFFFFFFFF:FFFFFFF:FFF:FFFFFFFFFFFFFFFF:FFFFFFFFFFFFFFFF  
@A00155:342:HHGFNDSXY:1:1471:13919:3020 2:N:0:GAACCTAG+TCCGCATA  
TGATGACGAACCTCCCTTGAAGCGACGCCTGAAATTTCCCCACTGCAGTCATCTTCTGCACCGAGAAAT  
AATTCCTAGTCGTGGTGATATTGCTGTCATTCACTCGCAGCACCCCACCATGGTACGTGCTATGCCTT  
+  
FFFFFFFFFFFFFFFFFFFFFFFFFFFFFFFFFFFFFFFFFFFFFFFF: :FFF:FFFFFFFFFFFFFFFF  
:FFFFFFFFFFFFFFFFFFFFFFFFFFFFFFFFFFFFFFFFFFFFFFFFFFFFFFFFFFFFFFFFFFFFFFFF  
@A00155:342:HHGFNDSXY:1:2436:13575:16360 1:N:0:GAACCTAG+TCCGCATA  
TGATGACGAACCTCCCTTGAAGCGACGCCTGAAATTTCCCCACTGCAGTCATCTTCTGCACCGAGAAAT  
AATTCCTAGTCGTGGTGATATTGCTGTCATTCACTCGCAGCACCCCACCATGGTACGTGCTATGCCTT  
+  
FFFFFFFFFFFFFFFFFFFFFFFFFFFFFFFFFFFFFFFFFFFFFFFFFFFFFFFFFFFFFFFFFFFFFFFF  
FFFFFF:FFFFFFFFFFFFFFFFFFFFFFFFFFFFFFFFFFFFFFFFFFFFFFFFFFFFFFFFFFFFFFFF  
@A00155:342:HHGFNDSXY:1:1323:23547:8860 2:N:0:GAACCTAG+TCCGCATA  
TGATGACGAACCTCCCTTGAAGCGACGCCTGAAATTTCCCCACTGCAGTCATCTTCTGCACCGAGAAAT  
AATTCCTAGTCGTGGTGATATTGCTGTCATTCACTCGCAGCACCCCACCATGGTACGTGCTATGCCTT  
+  
:FFFFFFFFFFFFFFFFFFFFFFFFFFFFFFFFFFFFFFFFFFFFFFFF,FFFFFF:FFFFFFFFFFFFFFFF  
FFFFFFFFFFFFFFFFFFFFFFFFFFFFFFFFFFFFFFFFFFFFFFFFFFFFFFFFFFFFFFFFFFFFFFFF  
@A00155:342:HHGFNDSXY:1:1154:29532:3630 2:N:0:GAACCTAG+TCCGCATA  
TGATGACGAACCTCCCTTGAAGCGACGCCTGAAATTTCCCCACTGCAGTCATCTTCTGCACCGAGAAAT  
AATTCCTAGTCGTGGTGATATTGCTGTCATTCACTCGCAGCACCCCACCATGGTACGTGCTATGCCTT  
+  
F, :FFFFFFFFFFFF,FFFFFFFF:FFFF:F:FFFFFFFF:FFFF,FFFFFFFFFFFFFFFF  
F,FF:FFFF:FFFF:FFFF:FFFFFFFF,FFFF:FFFFFFFFFFFFFFFFFFFFFFFF  
@A00155:342:HHGFNDSXY:1:1413:5385:3208 2:N:0:GAACCTAG+TCCGCATA  
ACGAACCTCCCTTGAAGCGACGCCTGAAATTTCCCCACTGCAGTCATCTTCTGCACCGAGAAATAATTC  
CTAGTCGTGGTGATATTGCTGTCATTCACTCGCAGCACCCCACCATGGTACGTGCTATGCCTTAAATT  
+



[illegible]

FFFFFFFF:FFFFFFFFFFFFFFFF:F,FF:FFFFFFFFFFFFFFFFFFFFFFFF,FFFFFFF  
FFFFFFFFFFFFFFFFFFFFFFFFFFFFFFFF:FFFFFFF:FFFFFFFFFFFFFFFFFFFFFFFF:F  
@A00155:342:HHGFNDSXY:1:1206:16233:16736 2:N:0:GAACCTAG+TCCGCATA  
TCCCTTGAAGCGACGCCTGAAATTTCCCCACTGCAGTCATCTTCTGCACCGAGAAATAATTCCTAGTC  
GTGGTGATATTGCTGTCATTCACTCGCAGCACCCCACCATGGTACGTGCTATGCCTTAAATTACCATC  
+  
FFFFFFFFFFFFFFFFFFFF::FFFFFFFFFFFFFF,FFFFFFFFFFFFFFFFFFFFFFFF:FFFFFFF  
FF:FFFFFF,FFFFFFFFFFFFFFFFFFFFFFFFFFFFFFFF:FFFFFFFFFFFFFFFFFFFFFFFF,FF  
@A00155:342:HHGFNDSXY:1:1206:16667:21339 2:N:0:GAACCTAG+TCCGCATA  
TCCCTTGAAGCGACGCCTGAAATTTCCCCACTGCAGTCATCTTCTGCACCGAGAAATAATTCCTAGTC  
GTGGTGATATTGCTGTCATTCACTCGCAGCACCCCACCATGGTACGTGCTATGCCTTAAATTACCATC  
+  
FFFFFFFFFFFFFFFFFFFFFFFFFFFFFFFF,FFFFFFFFFFFFFFFFFFFFFFFFFFFFFFFF  
FFFFFFFFFFFFFFFFFFFFFFFFFFFFFFFF:FFFFFFFFFFFFFFFFFFFFFFFF:FFFFF  
@A00155:342:HHGFNDSXY:1:1206:16107:16517 2:N:0:GAACCTAG+TCCGCATA  
TCCCTTGAAGCGACGCCTGAAATTTCCCCACTGCAGTCATCTTCTGCACCGAGAAATAATTCCTAGTC  
GTGGTGATATTGCTGTCATTCACTCGCAGCACCCCACCATGGTACGTGCTATGCCTTAAATTACCATC  
+  
FFFFFFFFFFFFFFFFFFFFFFFF:FFFFFF:FFFFFF:FF:FFFFFFFFFFFFFFFFFFFFFFFF:FFFFFFF  
FFFFFFFFFFFFFFFFFFFFFFFFFFFFFFFFFFFFFFFFFFFFFFFFFFFFFFFFFFFFFFFF:FF  
@A00155:342:HHGFNDSXY:1:1206:15176:16595 2:N:0:GAACCTAG+TCCGCATA  
TCCCTTGAAGCGACGCCTGAAATTTCCCCACTGCAGTCATCTTCTGCACCGAGAAATAATTCCTAGTC  
GTGGTGATATTGCTGTCATTCACTCGCAGCACCCCACCATGGTACGTGCTATGCCTTAAATTACCATC  
+  
FFFF:FFFF:FFFFFFFFFFFF,:FFFF,FF:F:F,F:FF:FFFFFFFFFFFFFFFFFFFFFFFF  
FFFFFFFFFFFFFFFFFFFFFFFFFFFFFFFFFFFFFFFFFFFFFFFFFFFFFFFFFFFFFFFF,FF  
@A00155:342:HHGFNDSXY:1:2149:25391:28588 2:N:0:GAACCTAG+TCCGCATA  
TCCCTTGAAGCGACGCCTGAAATTTCCCCACTGCAGTCATCTTCTGCACCGAGAAATAATTCCTAGTC  
GTGGTGATATTGCTGTCATTCACTCGCAGCACCCCACCATGGTACGTGCTATGCCTTAAATTACCATC  
+  
FF:F:,FF:FFFFFFFFFFFF,FFFF,,F,:::,FFFFFFFFFFFFFFFFFFFF,FF,FFFFFF:, :FFFF:  
F:,F:FFFFFF:F:FFFF:F,FFFF:FFFF,F:F:FF,:FFF:FF,,FFFF,,F:F:FF:F:FFF  
@A00155:342:HHGFNDSXY:1:2613:21567:14888 2:N:0:GAACCTAG+TCCGCATA  
TCCCTTGAAGCGACGCCTGAAATTTCCCCACTGCAGTCATCTTCTGCACCGAGAAATAATTCCTAGTC  
GTGGTGATATTGCTGTCATTCACTCGCAGCACCCCACCATGGTACGTGCTATGCCTTAAATTACCATC  
+  
FFFF,,FFFFFFFFFFFFFFFFFFFF,FFF:FFFFFFFFFFFFFF:FFFFFFFFFFFFFF:FFFFFFFFFFFF  
FFFF:FFFFFFFFFFFFFFFFFFFFFFFFFFFFFFFFFFFFFFFFFFFFFFFFFFFFFFFFFFFFFFFF  
@A00155:342:HHGFNDSXY:1:1143:24424:22122 2:N:0:GAACCTAG+TCCGCATA  
TCCCTTGAAGCGACGCCTGAAATTTCCCCACTGCAGTCATCTTCTGCACCGAGAAATAATTCCTAGTC  
GTGGTGATATTGCTGTCATTCACTCGCAGCACCCCACCATGGTACGTGCTATGCCTTAAATTACCATC  
+  
FFF::FFFFFFFFFFFFFF:FFFFFFFFFFFF:FF,:FFFF,FFFFFFFFFFFFFFFFFFFFFFFF:F:FFF  
FFFFFFFFFFFFFFFFFFFFFFFF:FFFFFFFFFFFFFF,FFFFFFFFFFFFFFFFFFFFFFFF:FFFFFFF  
@A00155:342:HHGFNDSXY:1:1605:9661:17879 2:N:0:GAACCTAG+TCCGCATA  
TCCCTTGAAGCGACGCCTGAAATTTCCCCACTGCAGTCATCTTCTGCACCGAGAAATAATTCCTAGTC  
GTGGTGATATTGCTGTCATTCACTCGCAGCACCCCACCATGGTACGTGCTATGCCTTAAATTACCATC  
+  
F:FFFFFFFFFFFFFFFFFFFFFFFF,FFFFFFFFFFFFFFFFFFFFFFFFFFFFFFFF:FFFFFFFFFFFF  
FFFFFFFFFFFFFFFFFFFFFFFFFFFFFFFFFFFFFFFFFFFFFFFFFFFFFFFFFFFFFFFF:FFFFF  
@A00155:342:HHGFNDSXY:1:2276:17644:4899 2:N:0:GAACCTAG+TCCGCATA  
TCCCTTGAAGCGACGCCTGAAATTTCCCCACTGCAGTCATCTTCTGCACCGAGAAATAATTCCTAGTC  
GTGGTGATATTGCTGTCATTCACTCGCAGCACCCCACCATGGTACGTGCTATGCCTTAAATTACCATC  
+

FFFFFFFFFFFFFFFFFFFFFFFFFFFFFFFFFFFFFFFFFFFFFFFFFFFFFFFFFFFFFFFFFFFFFFFF  
FFFFFFFFFFFFFFFFFFFFFFFFFFFFFFFFFFFFFFFFFFFFFFFFFFFFFFFFFFFFFFFFFFFFFFFF  
@A00155:342:HHGFNDSXY:1:2650:25473:5556 2:N:0:GAACCTAG+TCCGCATA  
CCTTGAAGCGACGCCTGAAATTTCCCCACTGCAGTCATCTTCTGCACCGAGAAATAATTCCTAGTCGT  
GGTGATATTGCTGTCATTCACTCGCAGCACCCCACCATGGTACGTGCTATGCCTTAAATT  
+  
FFFFFFFF:FF:FFFFFFFFF,FFFFFF:FFFFFF:FFF:,FFFFFFFFFFFFFFFFFFFFFFFFF  
FFFFFFFFFFFFFFFFFFFFFFFFFFFFFFFFFFFFFFFFFFFFFFFFFFFFFFFFFFFFFFFFFFFF  
@A00155:342:HHGFNDSXY:1:1237:5367:14512 2:N:0:GAACCTAG+TCCGCATA  
CCTTGAAGCGACGCCTGAAATTTCCCCACTGCAGTCATCTTCTGCACCGAGAAATAATTCCTAGTCGT  
GGTGATATTGCTGTCATTCACTCGCAGCACCCCACCATGGTACGTGCTATGCCTTAAATTACCATCGA  
+  
FFFFFFFF:FFFFFFFFFFFFFFFFFFFFFFFFFFFFFFFFFFFF::FFFF:FFFFFFFFFFFFFFFF:FFF  
FFF:FFFFFFFFFFFF:FFFFFFFFFFFFFFFFFFFFFFFFFFFF::FFFF,FFFFFFFFFFFFF  
@A00155:342:HHGFNDSXY:1:1235:24198:33567 2:N:0:GAACCTAG+TCCGCATA  
CCTTGAAGCGACGCCTGAAATTTCCCCACTGCAGTCATCTTCTGCACCGAGAAATAATTCCTAGTCGT  
GGTGATATTGCTGTCATTCACTCGCAGCACCCCACCATGGTACGTGCTATGCCTTAAATTACCATCGA  
+  
FFFFF:FFFFFFFFFFFFFFFFFFFFFFFFFFFFFFFFFFFF:FFFFFFFFFFFFFFFF:FFFFFFFFFFFF  
FFFFFFFFFFFFFFFF:FFFFFFFFFFFFFFFFFFFFFFFFFFFFFFFFFFFFFFFFFFFFFFFFFFFFF  
@A00155:342:HHGFNDSXY:1:2141:17644:15828 2:N:0:GAACCTAG+TCCGCATA  
CTTGAAGCGACGCCTGAAATTTCCCCACTGCAGTCATCTTCTGCACCGAGAAATAATTCCTAGTCGTG  
GTGATATTGCTGTCATTCACTCGCAGCACCCCACCATGGTACGTGCTATGCCTTAAATTACCA  
+  
FFFFFFFFFFFFFFFFFFFFFFFFFFFFFFFFFFFFFFFFFFFF,FFFFFFFFFFFFFFFF:FFF:FFFFFFFFF  
FFFFFFFFFFFFF:F:FFFFFFFFFFFFFFFFFFFFFFFFFFFFFFFFFFFFFFFFFFFFFFFFFFFFF:  
@A00155:342:HHGFNDSXY:1:1316:25979:16705 2:N:0:GAACCTAG+TCCGCATA  
CTTGAAGCGACGCCTGAAATTTCCCCACTGCAGTCATCTTCTGCACCGAGAAATAATTCCTAGTCGTG  
GTGATATTGCTGTCATTCACTCGCAGCACCCCACCATGGTACGTGCTATGCCTTAAATTACCA  
+  
FFFFFFFFFFFFFFFFFFFFFFFFFFFFFFFFFFFFFFFFFFFFFFFFFFFFFFFFFFFFFFFFFFFFFFFF  
FFFFFFFFFFFFFFFFFFFFFFFFFFFFFFFFFFFFFFFFFFFFFFFFFFFFFFFFFFFFFFFFFFFFF:  
@A00155:342:HHGFNDSXY:1:1106:17228:13917 1:N:0:GAACCTAG+TCCGCATA  
CTTGAAGCGACGCCTGAAATTTCCCCACTGCAGTCATCTTCTGCACCGAGAAATAATTCCTAGTCGTG  
GTGATATTGCTGTCATTCACTCGCAGCACCCCACCATGGTACGTGCTATGCCTTAAATTACCATCGAA  
+  
FFFFFFFFFFFFFFFFFFFFFFFFFFFFFFFFFFFFFFFFFFFFFFFFFFFFFFFFFFFFFFFFFFFFFFFF  
FFFFFFFFFFFFFFFFFFFFFFFFFFFFFFFFFFFFFFFFFFFFFFFFFFFFFFFFFFFFFFFFFFFFF  
@A00155:342:HHGFNDSXY:1:2456:11921:12273 2:N:0:GAACCTAG+TCCGCATA  
TTGAAGCGACGCCTGAAATTTCCCCACTGCAGTCATCTTCTGCACCGAGAAATAATTCCTAGTCGTG  
TGATATTGCTGTCATTCACTCGCAGCACCCCACCATGGTACGTGCTATGCCTTAAATTACCATCGAAG  
+  
::FFFFFFFF:FFFF:FFF:FF:FFFFFFFFFFFFFFFFFFFFFFFF:FFFFFFFFFFFFFFFFFFFFF  
FF:FFFFFFFFFFFFFFFFFFFFFFFFFFFFFFFFFFFFFFFFFFFFFFFFFFFFFFFFFFFFFFFFFFFF  
@A00155:342:HHGFNDSXY:1:2638:22227:34162 2:N:0:GAACCTAG+TCCGCATA  
TTGAAGCGACGCCTGAAATTTCCCCACTGCAGTCATCTTCTGCACCGAGAAATAATTCCTAGTCGTGG  
TGATATTGCTGTCATTCACTCGCAGCACCCCACCATGGTACGTGCTATGCCTTAAATTACCATCGAAG  
+  
FFFFFFFFFFFFFFFFFFFF,FFFFFF,FFFFFFFFFFFF:FFF:F:FFFFFFFFFFFFFFFFFFFFF  
FFFFFFFFF:FFFF:FFFFFFFFFFFFFFFFFFFFFFFFFFFFFFFFFFFF:FFFFFFFF,::FFFFFFFF  
@A00155:342:HHGFNDSXY:1:2207:31042:27821 2:N:0:GAACCTAG+TCCGCATA  
TGAAGCGACGCCTGAAATTTCCCCACTGCAGTCATCTTCTGCACCGAGAAATAATTCCTAGTCGTGGT  
GATATTGCTGTCATTCACTCGCAGCACCCCACCATGGTACGTGCTATGCCTTAAATTACCATCGAAGT  
+

[illegible]

FFFFFFFFFFFFFFFFFFFFFFFFFFFFFFFFFFFFFFFFFFFFFFFFFFFFFFFFFFFFFFFFFFFFFFFFFFFFFFFF  
FFFFFFFFFFFFFFFFFFFFFFFFFFFFFFFFFFFFFFFFFFFFFFFFFFFFFFFFFFFFFFFFFFFFFFFFFFFFFFFF  
@A00155:342:HHGFNDSXY:1:2262:31286:21230 2:N:0:GAACCTAG+TCCGCATA  
CGACGCCTGAAATTTCCCCACTGCAGTCATCTTCTGCACCGAGAAATAATTCCTAGTCGTGGTGATAT  
TGCTGTCATTCACTCGCAGCACCCCACCATGGTACGTGCTATGCCTTAAATTACCATCGAAGTTGAAT  
+  
FFFFFFFFFFFFFFFFFFFFFFFFFFFFFFFFFFFFFFFFFFFFFFFFFFFFFFFFFFFFFFFFFFFFFFFFFFFFFFFF  
FFF:FFFFFFFF:FFFFF:FFFFFFFFFFFFFFFFFFFFFFFFFFFFFFFFFFFFFFFFFFFFFFFF:FFF,FFFFFFFF:FF  
@A00155:342:HHGFNDSXY:1:1214:19732:8516 2:N:0:GAACCTAG+TCCGCATA  
CGACGCCTGAAATTTCCCCACTGCAGTCATCTTCTGCACCGAGAAATAATTCCTAGTCGTGGTGATAT  
TGCTGTCATTCACTCGCAGCACCCCACCATGGTACGTGCTATGCCTTAAATTACCATCGAAGTTGAAT  
+  
FFFF,FFFFFFFF:FFFFFFFFFFFF,F:FFFFFFFF:FFFFF:FFFF:FFF:FFFFFFFF:F,FFFFFF  
FFFFFFFFFFFF:FFF,FFFFF:F:FFF:FFFFFFFFFFFF:FFFFFFFF:FFF:FF:FFF:FFF:F:FFF  
@A00155:342:HHGFNDSXY:1:1223:31304:10144 2:N:0:GAACCTAG+TCCGCATA  
ACGCCTGAAATTTCCCCACTGCAGTCATCTTCTGCACCGAGAAATAATTCCTAGTCGTGGTGATATTG  
CTGTCATTCACTCGCAGCACCCCACCATGGTACGTGCTATGCCTTAAATTACCATCGAAGTTGAATTC  
+  
FFFFFFFFFFFF:FFFFFF:FFFFFFFFFFFF:FFFFFFFFFFFFFFFFFFFFFFFFFFFFFFFFFFFFFFFFFFFF  
FFFFFFFFFFFFFFFFFFFFFFFFFFFFFFFFFFFFFFFFFFFFFFFFFFFFFFFFFFFFFFFFFFFFFFFFFFFF  
@A00155:342:HHGFNDSXY:1:2262:8386:6183 2:N:0:GAACCTAG+TCCGCATA  
CGCCTGAAATTTCCCCACTGCAGTCATCTTCTGCACCGAGAAATAATTCCTAGTCGTGGTGATATTGC  
TGTCATTCACTCGCAGCACCCCACCATGGTACGTGCTATGCCTTAAATTACCATCGAAGTTGAATTTCG  
+  
FFFF:FFFF,FFFFFFFFFFFFFFFFFFFF,,F:FFFFFFFFFFFF:FF::F,FFF:FFFFFFFFFFFF,FFFF  
FFFFFFFFFFFFFFFFFFFF:FFFFFFFF:FFFF:FFFFFFFFFFFFF:F::FF:F,FFF::FFF:FFFFF  
@A00155:342:HHGFNDSXY:1:1172:24469:14716 2:N:0:GAACCTAG+TCCGCATA  
CGCCTGAAATTTCCCCACTGCAGTCATCTTCTGCACCGAGAAATAATTCCTAGTCGTGGTGATATTGC  
TGTCATTCACTCGCAGCACCCCACCATGGTACGTGCTATGCCTTAAATTACCATCGAAGTTGAATTTCG  
+  
FFFFFFFFFFFF:FFF:FFFFFFFFFFFF:FFFFFFFFFFFFFFFFFFFFFFFFFFFFFFFFFFFFFFFFFFFF  
FFFFF:FFFFFFFFFFFFFFFFFFFFFFFFFFFFFFFFFFFFFFFFFFFFFFFFFFFFFFFFFFFFFFFFFFFF,FFFFFFFFFFFFFFFFFFFF  
@A00155:342:HHGFNDSXY:1:2505:19569:4163 2:N:0:GAACCTAG+TCCGCATA  
CGCCTGAAATTTCCCCACTGCAGTCATCTTCTGCACCGAGAAATAATTCCTAGTCGTGGTGATATTGC  
TGTCATTCACTCGCAGCACCCCACCATGGTACGTGCTATGCCTTAAATTACCATCGAAGTTGAATTTCG  
+  
FFFFFFFFFFFF:F:FFFF:FF,FFFFF:F,FFFFFFFFFFFF:FFF:FFFFFFFFFFFFFFFFFFFFFFFFFFFF:FFF  
,FFFFFFFFFFFFFFFFFFFFFFFFFFFFFFFFFFFFFFFFFFFFFFFFFFFFFFFFFFFFFFFFFFFFFFFFFFFF:FFFFFFFFFFFF  
@A00155:342:HHGFNDSXY:1:1512:5819:28291 1:N:0:GAACCTAG+TCCGCATA  
CGCCTGAAATTTCCCCACTGCAGTCATCTTCTGCACCGAGAAATAATTCCTAGTCGTGGTGATATTGC  
TGTCATTCACTCGCAGCACCCCACCATGGTACGTGCTATGCCTTAAATTACCATCGAAGTTGAATTTCG  
+  
FFFFFFFFFFFFFFFFFFFF:FFFFFFFFFFFFFFFFFFFFFFFFFFFF:FFFFFFFFFFFFFFFFFFFF:FFFFFFFFFFFF  
FFFFFFFFFFFFFFFFFFFFFFFFFFFFFFFFFFFFFFFFFFFFFFFFFFFFFFFFFFFFFFFFFFFFFFFFFFFF:FFFFFFFFFFFFFFFFFFFF  
@A00155:342:HHGFNDSXY:1:1207:20672:34695 1:N:0:GAACCTAG+TCCGCATA  
CGCCTGAAATTTCCCCACTGCAGTCATCTTCTGCACCGAGAAATAATTCCTAGTCGTGGTGATATTGC  
TGTCATTCACTCGCAGCACCCCACCATGGTACGTGCTATGCCTTAAATTACCATCGAAGTTGAATTTCG  
+  
FFFF,FFFFFFFFFFFFFFFFFFFFF:FFFFFFFFFFFFFFFFFFFFFFFFFFFF:FFFFFFFFFFFF:FFFFFFFFFFFF  
FFFFF:FFFFFFFFFFFFFFFFFFFFFFFFFFFFFFFFFFFFFFFFFFFFFFFFFFFFFFFFFFFFFFFFFFFF:FFFF:FFFF:FFFFFFFFFFFF:F,FF  
@A00155:342:HHGFNDSXY:1:1313:31964:8563 2:N:0:GAACCTAG+TCCGCATA  
CGCCTGAAATTTCCCCACTGCAGTCATCTTCTGCACCGAGAAATAATTCCTAGTCGTGGTGATATTGC  
TGTCATTCACTCGCAGCACCCCACCATGGTACGTGCTATGCCTTAAATTACCATCGAAGTTGAATTTCG  
+

[illegible]

@A00155:342:HHGFNDSXY:1:2658:2302:27336 1:N:0:GAACCTAG+TCCGCATA  
CCTGAAATTTCCCCACTGCAGTCATCTTCTGCACCGAGAAATAATTCTAGTCGTGGTGATATTGCTG  
TCATTCACTCGCAGCACCCCACCATGATACGTGCTATGCCTTAAATTACCATCGAAGTTGAATTCGGC  
+  
FF:FFFFFFFFFFFFFFFFFFFFFFFFFFFFFFFFFFFFFFFFFFFFFFFFFFFFFFFFFFFFFFFFFFFFFFFFFFFFF,FF  
FFFFFFFFFFFFFF:FFFFFFFFFFFFFFFFFFFFFFFFFFFFFFFFFFFFFFFFFFFFFFFFFFFFFFFFFFFFFFFFFFFFF:FFFF:FFF:F  
@A00155:342:HHGFNDSXY:1:1315:19940:35650 2:N:0:GAACCTAG+TCCGCATA  
CCTGAAATTTCCCCACTGCAGTCATCTTCTGCACCGAGAAATAATTCTAGTCGTGGTGATATTGCTG  
TCATTCACTCGCAGCACCCCACCATGGTACGTGCTATGCCTTAAATTACCATCGAAGTTGAATTCGGC  
+  
FFFFFFFFFFFFFFFFFFFFFF:FFF:FFFFFFFFFFFFFFFFFFFFFFFFFFFFFFFFFFFFFFFFFFFFFFFFFFFFFFFFFFFFF  
FFFFFFFFFFFFFFFFFFFFFFFFFFFFFFFFFFFFFFFFFFFFFFFFFFFFFFFFFFFFFFFFFFFFFFFFFFFFFFFFFFFFF,FFFFFFFFFFFFFFFFFFFFFFFFFFFFF:FFFFFFFFFFFFFFFFFFFFFFFFFFFFF  
@A00155:342:HHGFNDSXY:1:1460:13856:30812 2:N:0:GAACCTAG+TCCGCATA  
CTGAAATTTCCCCACTGCAGTCATCTTCTGCACCGAGAAATAATTCTAGTCGTGGTGATATTGCTGT  
CATTCACTCGCAGCACCCCACCATGGTACGTGCTATGCCTTAAATTACCATCGAAGTTGAATTCG  
+  
FFFFFFF,FFFFFFFFFFFFFF:FFF,FFFF,FFFFFFFFFFFF:FFFFFFFFFFFF:FFFFFFFFFFFFFFFFFFFFFFFFFFFFF  
FFFFFFFFFFFFFFFFFFFFFFFFFFFFFFFFFFFFFFFFFFFFFFFFFFFFFFFFFFFFFFFFFFFFFFFFFFFFFFFFFFFFF  
@A00155:342:HHGFNDSXY:1:2650:25473:5556 1:N:0:GAACCTAG+TCCGCATA  
TGAAATTTCCCCACTGCAGTCATCTTCTGCACCGAGAAATAATTCTAGTCGTGGTGATATTGCTGTC  
ATTCACTCGCAGCACCCCACCATGGTACGTGCTATGCCTTAAATTACCATCGAAGTTGAAT  
+  
FFFFFFFFFFFFFFFFFFFFFFFFFFFFF:FFFFFFFFFFFFFFFFFFFFFFFFFFFFFFFFFFFFFFFFFFFFFFFFFFFFFFFFFFFFF  
FFFFFFFFFFFFFFFFFFFFFFFFFFFFFFFFFFFFFFFFFFFFFFFFFFFFFFFFFFFFFFFFFFFFFFFFFFFFFFFFFFFFF:  
@A00155:342:HHGFNDSXY:1:1521:7916:28385 1:N:0:GAACCTAG+TCCGCATA  
TGAAATTTCCCCACTGCAGTCATCTTCTGCACCGAGAAATAATTCTAGTCGTGGTGATATTGCTGTC  
ATTCACTCGCAGCACCCCACCATGGTACGTGCTATGCCTTAAATTACCATCGAAGTTGAATTCGGCTC  
+  
FFFFFFFFFFFFFFFFFFFFFFFFFFFFFFFFFFFFFFFFFFFFFFFFFFFFFFFFFFFFFFFFFFFFFFFFFFFFFFFFFFFFF,FFF  
FFFFFFFFFFFFFFFFFFFFFFFFFFFFFFFFFFFFFFFFFFFFFFFFFFFFFFFFFFFFFFFFFFFFFFFFFFFFFFFFFFFFF:FFF:FFFFF:FF:FFFFFFFFFFFFFFFFFFFFFFFFFFFFF  
@A00155:342:HHGFNDSXY:1:1624:13331:10050 1:N:0:GAACCTAG+TCCGCATA  
TGAAATTTCCCCACTGCAGTCATCTTCTGCACCGAGAAATAATTCTAGTCGTGGTGATATTGCTGTC  
ATTCACTCGCAGCACCCCACCATGGTACGTGCTATGCCTTAAATTACCATCGAAGTTGAATTCGGCTC  
+  
FFFFFFFFFFFFFFFFFFFFFFFFFFFFFFFFFFFFFFFFFFFFFFFFFFFFFFFFFFFFFFFFFFFFFFFFFFFFFFFFFFFFF  
FFFFFFFFFFFFFFFFFFFFFFFFFFFFFFFFFFFFFFFFFFFFFFFFFFFFFFFFFFFFFFFFFFFFFFFFFFFFFFFFFFFFF:FFF  
@A00155:342:HHGFNDSXY:1:1521:8106:28056 1:N:0:GAACCTAG+TCCGCATA  
TGAAATTTCCCCACTGCAGTCATCTTCTGCACCGAGAAATAATTCTAGTCGTGGTGATATTGCTGTC  
ATTCACTCGCAGCACCCCACCATGGTACGTGCTATGCCTTAAATTACCATCGAAGTTGAATTCGGCTC  
+  
FFFFFFFFFFFFFFFFFFFFFFFFFFFFFFFFFFFFFFFFFFFFFFFFFFFFFFFFFFFFFFFFFFFFFFFFFFFFFFFFFFFFF  
FFFFFFFFFFFFFFFFFFFFFFFFFFFFFFFFFFFFFFFFFFFFFFFFFFFFFFFFFFFFFFFFFFFFFFFFFFFFFFFFFFFFF  
@A00155:342:HHGFNDSXY:1:1645:9435:4304 2:N:0:GAACCTAG+TCCGCATA  
TGAAATTTCCCCACTGCAGTCATCTTCTGCACCGAGAAATAATTCTAGTCGTGGTGATATTGCTGTC  
ATTCACTCGCAGCACCCCACCATGGTACGTGCTATGCCTTAAATTACCATCGAAGTTGAATTCGGCTC  
+  
FFFFFFFFFFFFFFFFFFFFFF:FFFFFFFFF:FFFFFFFFFFFFFFFFFFFFFFFFFFFFFFFFFFFFFFFFFFFFFFFFFFFFFFFFFFFFF  
FFFFFFFFFFFFFFFFFFFFFFFFFFFFFFFFFFFFFFFFFFFFFFFFFFFFFFFFFFFFFFFFFFFFFFFFFFFFFFFFFFFFF  
@A00155:342:HHGFNDSXY:1:2114:22101:15029 1:N:0:GAACCTAG+TCCGCATA  
TGAAATTTCCCCACTGCAGTCATCTTCTGCACCGAGAAATAATTCTAGTCGTGGTGATATTGCTGTC  
ATTCACTCGCAGCACCCCACCATGGTACGTGCTATGCCTTAAATTACCATCGAAGTTGAATTCGGCTC  
+  
FFFFFFF:FFFFFFFFFFFFFFFFFFFFF:FFFFFFFFFFFFFFFFFFFFFFFFFFFFFFFFFFFFFFFFFFFFFFFFFFFFFFFFFFFFF:FF:FFFFF  
FFFFFFFFF:FFFFFFFFFFFFFFFFFFFFF:FFFFFFFFFFFF,FFFFFFFFFFFF:FFFFFFFFFFFFFFFFFFFFFFFFFFFFF:FFFF

[illegible]



@A00155:342:HHGFNDSXY:1:2331:5855:15201 1:N:0:GAACCTAG+TCCGCATA  
TTTCCCCACTGCAGTCATCTTCTGCACCGAGAAATAATTCCTAGTCGTGGTGATATTGCTGTCATTCA  
CTCGCAGCACCCACCATGGTACGTGCTATGCCTTAAATTACCATCGAAGTTGAATTCGGCTCC

```

FFFFFFFF,FFFFFFFFFFFFFFFFFFFFFFFF:FFFFFFFFFFFFFFFFFFFFFFFFFFFFFFFF:FFFFFFFFFFFF:::FFFFFF
FFFFFFFF:FFFFFFFFFFFFFF:FFFF:,FFFFFFFFFFFFFFFFFFFFFFFFFFFFFFFFFFFFFFFFFFFFFFFFFFFFFFFF

```

@A00155:342:HHGFNDSXY:1:2426:3441:9862 1:N:0:GAACCTAG+TCCGCATA  
TTTCCCCACTGCAGTCATCTTCTGCACCGAGAAATAATTCCTAGTCGTGGTGATATTGCTGTCA  
CTCGCAGCACCCACCATGGTACGTGCTATGCCTTAAATTACCATCGAAGTTGAATTCGGCTCC

[illegible]

@A00155:342:HHGFNDSXY:1:1103:30752:28447 1:N:0:GAACCTAG+TCCGCATA  
TTTCCCCACTGCAGTCATCTTCTGCACCGAGAAATAATTCCTAGTCGTGGTGATATTGCTGTCATTCA  
CTCGCAGCACCCACCATGGTACGTGCTATGCCTTAAATTACCATCGAAGTTGAATTTCGGCTCC

[illegible]

@A00155:342:HHGFNDSXY:1:2652:30047:21997 1:N:0:GAACCTAG+TCGCATA  
TTTCCCCACTGCAGTCATCTTCTGCACCGAGAAATAATTCCTAGTCGTGGTGATATTGCTGTCATTCA  
CTCGCAGCACCCACCATGGTACGTGCTATGCCTTAAATTACCATCGAAGTTGAATTCGGCTCC

[illegible]

@A00155:342:HHGFNDSXY:1:2534:13946:22701 1:N:0:GAACCTAG+TCCGCATA  
TTTCCCCACTGCAGTCATCTTCTGCACCGAGAAATAATTCCTAGTCGTGGTGATATTGCTGTCATTCA  
CTCGCAGCACCCACCATGGTACGTGCTATGCCTTAAATTACCATCGAAGTTGAATTCGGCTCC

[illegible]

FFFFFFFFFFFFFFFFFFFFFFFFFFFFFFFFFFFFFFFFFFFFFFFFFFFFFFFFFFFFFFFFFFFFFFFFFFFF  
@A00155:342:HHGFNDSXY:1:2638:22227:34162 1:N:0:GAACCTAG+TCCGCATA

TTTCCCCACTGCAGTCATCTTCTGCACCGAGAAATAATTCCTAGTCGTGGTGATATTGCTGTCATTCA  
CTCGCAGCACCCACCATGGTACGTGCTATGCCTTAAATTACCATCGAAGTTGAATTCGGCTCC  
+

```

FFFFFFFF:FFFFFFFFFFFFFFFFFFFFFFFF:FF:FFFFFFFFFFFFFFFFFFFFFFFFFFFFFFFF:FFFFF:FF
FFF:FF::FFFFFFFFFFFFFFFF:FF:FFFFFFFFFFFFFFFF:FFFFFFFF:FF:FFF:FFFFFFFF:

```

@A00155:342:HHGFNDSXY:1:1314:28167:12289 1:N:0:GAACCTAG+TCCGCATA  
TTTCCCCACTGCAGTCATCTTCTGCACCGAGAAATAATTCCTAGTCGTGGTGATATTGCTGTCATTCA  
CTCGCAGCACCCCAACCATGGTACGTGCTATGCCTTAAATTACCATCGAAGTTGAATTCGGCTCC

[illegible]

FFFFFFFFFFFFFFFFFFFFFFFFFFFFFFFFFFFFFFFFFFFFFFFFFFFFFFFFFFF, FFFFFFFFFF: FFFF  
@A00155:342:HHGENDSXY:1:1574:18114:8907 1:N:0:GAACCTAG+TCCGCATA

TTTCCCCACTGCAGTCATCTTCTGCACCCGAGAAATAATTCTAGTCGTGGTGATATTCGCTGTCATTCA  
CTCGCAGCAGCCCCACCATTGGTACGTGCTATGCCTTAAATTACCATCGAAGATTGAATTCGGCTCC

[illegible]

FFFFFFFFFFFFFFFFFFFFFFFFFFFFFFFFFFFFFFFFFFFFFFFFFFFFFFFFFFFFFFFFFFFFFFFFFFFF  
@A00155:342:HHGENDSXY:1:2267:5945:20525 1:N:0:GAACCTAG+TCCGCATA

TTTCCCCACTGCAGTCATCTTCTGCACCGAGAAATAATTCCTAGTCGTGGTGATATTGCTGTCATTCA  
CTCGCAGCAGCCGCCACCATTGGGTACGTCGCTATGCTCTTAAATTTACCATCGAATTTGAATTTGCTGCTCC

[illegible][illegible]

@A00155:342:HHGFNDSXY:1:2331:5728:15076 1:N:0:GAACCTAG+TCCGCATA  
TTTCCCCACTGCAGTCATCTTCTGCACCGAGAAATAATTCCTAGTCGTGGTGATATTGCTGTCATTCA  
CTCGCAGCACCCACCATGGTACGTGCTATGCCTTAAATTACCATCGAAGTTGAATTCGGCTCC

```

FFFFFFFFFFFFFFFFFFFFFFFF:FFFFFFFF,FFFFFFFFFFFFFFFFFFFFFFFFFFFFFFFFFFFFFFFF:FFFFFFFFFFFFFFFF
FFFFFFFFFFFFFFFFFFFFFFFFFFFFFFFF:FFFFFFFFFFFFFFF,FFFFFFFFFFFFFFFFFFFFFFFFFFFFFFFFFFFFFFFF:

```

+

[illegible]

+

[illegible]

+

[illegible]

+

[illegible]

+

[illegible] $+$ 

```
FFFF:FF:F::F,FFFFFFFFF:F:FFFF:FFFFFFFFFFFFFFFF, ,FFFFFFFFFFFFFFFF
FFFFFFFFFFFFFFFF.FFFFFFFFFFFFFFFFFFFFFFFFFFFFFFFFFFFFFFFFF.FFFFF.FF
```

+

[illegible]

+

```

::FFFFFFFF,,::,FFFFFF,F:FFFFFFFFFFFFFFFFFFFFFFFFFFFFFFFFFFFFFFFF:FFFFFFFFFFFFFFFFFFFF
FFFFFFFF .FFFFFF.FFFFFFFF.FFFFFFFF.FFFFFFFF.FF.FF.FF.FF.FFFFFFFF.FFFFFFFF

```

@A00155:342:HHGFNDSXY:1:2106:26169:21386 2:N:0:GAACCTAG+TCCGCATA  
 CACTGCAGTCATCTTCTGCACCGAGAAATAATTCCTAGTCGTGGTGATATTGCTGTCAATTCAGTCGCA  
 GCACCCACCATGGTACGTGCTATGCCTTAAATTACCATCGAAGTTGAATTCGGCTCCTGGTGCCTCG  
 +  
 FFFFFFFF:FFFFFFFFFFFFFFFFFFFFFFFFFFFFFFFFFFFFFFFFFFFFFFFFFFFFFFFFFFFFFFFF  
 FFFFFFFFFFFFFFFFFFFFFFFFFFFFFFFFFFFFFFFFFFFFFFFFFFFFFFFFFFFFFFFFFFFFFFFFFF  
 @A00155:342:HHGFNDSXY:1:1676:12292:28948 1:N:0:GAACCTAG+TCCGCATA  
 ACTGCAGTCATCTTCTGCACCGAGAAATAATTCCTAGTCGTGGTGATATTGCTGTCAATTCAGTCGCA  
 CACCCACCATGGTACGTGCTATGCCTTAAATTACCATCGAAGTTGAATTCGGCTCCTGGTGCCTCGT  
 +  
 FFFFFFFFFFFFFFFFFFFFFFFFFFFFFFFFFFFFFFFFFFFFFFFFFFFFFFFFFFFFFFFFFFFFFFFFFF  
 FFFFFFFFFFFFFFFFFFFFFFFFFFFFFFFFFFFFFFFFFFFFFFFFFFFFFFFFFFFFFFFFFFFFFFFFFF  
 @A00155:342:HHGFNDSXY:1:1556:7527:36417 2:N:0:GAACCTAG+TCCGCATA  
 CTGCAGTCATCTTCTGCACCGAGAAATAATTCCTAGTCGTGGTGATATTGCTGTCAATTCAGTCGCA  
 ACCCCACCATGGTACGTGCTATGCCTTAAATTACCATCGAAGTTGAATTCGGCTCCTGGTGCCTCGT  
 +  
 FFFFFFFFFF,FFFFFFFFFFFFFFFFF,F,FFFFF:FFFFFFFFFFFFFFFFF,FFFFFFFFFFFFF:  
 FFFFFFFFFFFFFFFFFFFFFF:FFFF:FF,FFFFFFFFF:FFFFF:FFFFFFFFFFFFF,FFFFFFFFF  
 @A00155:342:HHGFNDSXY:1:1460:13856:30812 1:N:0:GAACCTAG+TCCGCATA  
 TGCAGTCATCTTCTGCACCGAGAAATAATTCCTAGTCGTGGTGATATTGCTGTCAATTCAGTCGCA  
 CCCCACCATGGTACGTGCTATGCCTTAAATTACCATCGAAGTTGAATTCGGCTCCTGGTGCCTCG  
 +  
 FFFFFFFFFFFFFFFFFFFFFFFFFF:FFFFFFFFFFFFFFFFFFFFFFFFFFFFFFFFFFFFFFFFFFFFF  
 FFFFFFFFFFFFFFFFFFFFFFFFFFFFFFFFFFFFFFFFFFFFFFFFFFFFFFFFFFFFFFFFFFFFFF  
 @A00155:342:HHGFNDSXY:1:1603:24840:29356 2:N:0:GAACCTAG+TCCGCATA  
 TGCAGTCATCTTCTGCACCGAGAAATAATTCCTAGTCGTGGTGATATTGCTGTCAATTCAGTCGCA  
 CCCCACCATGGTACGTGCTATGCCTTAAATTACCATCGAAGTTGAATTCGGCTCCTGGTGCCTCGTGA  
 +  
 FFFFFFFFFFFFFFFFFFFFFFFFFFFFFFFFFFFFFFFFFFFFFFFFFFFFFFFFFFFFFFFFFFFFFF  
 FFFFFFFFFF:FFFFFFFFFFFFFFFFFFFFFFFFFFFFFFFFFFFFFFFFFFFFFFFFFFFFF:FF:FFFFFFFFF  
 @A00155:342:HHGFNDSXY:1:2425:15275:34303 1:N:0:GAACCTAG+TCCGCATA  
 TGCAGTCATCTTCTGCACCGAGAAATAATTCCTAGTCGTGGTGATATTGCTGTCAATTCAGTCGCA  
 CCCCACCATGGTACGTGCTATGCCTTAAATTACCATCGAAGTTGAATTCGGCTCCTGGTGCCTCGTGA  
 +  
 FFFFFFFFFFFFFFFFFFFFFFFFFFFFFFFFFFFFFFFFFFFFFFFFFFFFFFFFFFFFFFFFFFFFFF  
 FFFFFFFFFFFFFFFFFFFFFFFFFFFFFFFFFFFFFFFFFFFFFFFFFFFFFFFFFFFFFF:FFFFFFFFFFFFF:  
 @A00155:342:HHGFNDSXY:1:2669:7238:12587 1:N:0:GAACCTAG+TCCGCATA  
 TGCAGTCATCTTCTGCACCGAGAAATAATTCCTAGTCGTGGTGATATTGCTGTCAATTCAGTCGCA  
 CCCCACCATGGTACGTGCTATGCCTTAAATTACCATCGAAGTTGAATTCGGCTCCTGGTGCCTCGTGA  
 +  
 FFFFFFFFFFFFFFFFFFFFFFFFFFFFFFFFFFFFFFFFFFFFFFFFFFFFFFFFFFFFFFFFFFFFFF  
 FFFFFFFFFFFFFFFFFFFFFF:FFFFFFFFFFFFFFFFFFFFFFFFFFFFFFFFFFFFFFFFFFFFF  
 @A00155:342:HHGFNDSXY:1:2538:32940:30702 2:N:0:GAACCTAG+TCCGCATA  
 TGCAGTCATCTTCTGCACCGAGAAATAATTCCTAGTCGTGGTGATATTGCTGTCAATTCAGTCGCA  
 CCCCACCATGGTACGTGCTATGCCTTAAATTACCATCGAAGTTGAATTCGGCTCCTGGTGCCTCGTGA  
 +  
 FFFFFFFFFFFFFFFFFFFFFF:FFFFFFFFF,FFFFFFFFFFFFFFFFFFFFFFFFFFFFFFFFFFFFF  
 FFFFFFFFFFFFFFFFFF:FFFFFFFFFFFFFFFFFFFFFFFFFFFFF:FFFFFFFFF:FFFFFFFFFFFFF:  
 @A00155:342:HHGFNDSXY:1:2165:26431:22028 1:N:0:GAACCTAG+TCCGCATA  
 TGCAGTCATCTTCTGCACCGAGAAATAATTCCTAGTCGTGGTGATATTGCTGTCAATTCAGTCGCA  
 CCCCACCATGGTACGTGCTATGCCTTAAATTACCATCGAAGTTGAATTCGGCTCCTGGTGCCTCGTGA  
 +  
 FFFFFFFFFFFFFFFFFFFFFFFFFFFFFFFFFFFFFFFFFFFFFFFFFFFFFFFFFFFFFF:FFFFFFFFFFFFF  
 FFFFFFFFFFFFFFFFFFFFFF:FFFFFFFFFFFFFFFFFFFFFFFFFFFFF:FFFFFFFFF:FFFFFFFFFFFFF

[illegible]

@A00155:342:HHGFNDSXY:1:2442:19795:15076 2:N:0:GAACCTAG+TCCGCATA  
CAGTCATCTTCTGCACCGAGAAATAATTCCTAGTCGTGGTGATATTGCTGTCATTCACTCGCAGCACC  
CCACCATGGTACGTGCTATGCCTTAAATTACCATCGAAGTTGAATTCGGCTCCTGGTGCCTC

+

FFFFFFFF:FFFFFFFFFFFFFF:FFFFFFF,F:FFFFFFFFFFFFFFFFFFFFFF,FFFFFFFFFFFFFF  
FFFFFFFFFFFFFF:FF:FFFFFFFF:FFF:FF::FFFFFFFFFFFFFFFFFFFFFFFFFFFFFF

@A00155:342:HHGFNDSXY:1:2221:31675:13197 2:N:0:GAACCTAG+TCCGCATA  
GTCATCTTCTGCACCGAGAAATAATTCCTAGTCGTGGTGATATTGCTGTCATTCACTCGCAGCACCCC  
ACCATGGTACGTGCTATGCCTTAAATTACCATCGAAGTTGAATTCGGCTCCTGGTGCCTCGT

+

FFF:FFFFFFFFFFFFFF:FFFFFF:F:FF:FFFFFFFFFFFFFFFFFFFFFFFFFFFFFFFFFFFFFF  
FFFFFFFFFFFFFFFFFFFFFF:FFF:FF,FFFFFF:FFFFFFFFFFFFFFFFFFFFFFFFFFFFFF

@A00155:342:HHGFNDSXY:1:2555:30689:5729 2:N:0:GAACCTAG+TCCGCATA  
GTCATCTTCTGCACCGAGAAATAATTCCTAGTCGTGGTGATATTGCTGTCATTCACTCGCAGCACCCC  
ACCATGGTACGTGCTATGCCTTAAATTACCATCGAAGTTGAATTCGGCTCCTGGTGCCTCGTGA

+

FFFFFFFFFFFFFFFFFFFFFFFFFFFFFF:FFFFFFFFFFFFFFFFFFFFFFFFFFFFFFFFFFFFFF  
FFFFFFFFFFFFFFFFFFFFFFFFFFFFFF:FFFFFF:FFFFFFFFFFFFFFFFFFFFFFFFFFFFFF

@A00155:342:HHGFNDSXY:1:2441:7048:13792 1:N:0:GAACCTAG+TCCGCATA  
GTCATCTTCTGCACCGAGAAATAATTCCTAGTCGTGGTGATATTGCTGTCATTCACTCGCAGCACCCC  
ACCATGGTACGTGCTATGCCTTAAATTACCATCGAAGTTGAATTCGGCTCCTGGTGCCTCGTGATTG

+

FFFFFFFFFFFFFFFFFFFFFFFFFFFFFF:FFFFFFFFFFFFFFFFFFFFFFFFFFFFFF  
FFFFFFFF:FFFFFFFFFFFFFFFFFFFFFF:FFFFFFFFFFFFFFFFFFFFFF:FFF:FFFFFFFFFFFFFFFFFFFFFF:FFF

@A00155:342:HHGFNDSXY:1:1229:30400:8296 2:N:0:GAACCTAG+TCCGCATA  
GTCATCTTCTGCACCGAGAAATAATTCCTAGTCGTGGTGATATTGCTGTCATTCACTCGCAGCACCCC  
ACCATGGTACGTGCTATGCCTTAAATTACCATCGAAGTTGAATTCGGCTCCTGGTGCCTCGTGATTG

+

F:FFFFFF:FFFFFFFFFFFFFF:FFFFFFFFFFFFFFFFFFFFFFFFFFFFFFFFFFFFFF  
FFFFFFFFFFFFFFFFFFFFFFFFFFFFFF:FFFFFFFFFFFFFFFFFFFFFFFFFFFFFFFFFFFFFF

@A00155:342:HHGFNDSXY:1:2126:8187:14043 1:N:0:GAACCTAG+TCCGCATA  
CTTCTGCACCGAGAAATAATTCCTAGTCGTGGTGATATTGCTGTCATTCACTCGCAGCACCCCACCAT  
GGTACGTGCTATGCCTTAAATTACCATCGAAGTTGAATTCGGCTCCTGGTGCCTCGTGATTG

+

FFFFFFFFFFFFFFFFFFFFFFFFFFFFFF:FFFFFFFFFFFFFFFFFFFFFFFFFFFFFFFFFFFFFF  
FFFFFFFFFFFFFFFFFFFFFFFFFFFFFF:FFFFFFFFFFFFFFFFFFFFFFFFFFFFFFFFFFFFFF

@A00155:342:HHGFNDSXY:1:1512:5819:28291 2:N:0:GAACCTAG+TCCGCATA  
TTCTGCACCGAGAAATAATTCCTAGTCGTGGTGATATTGCTGTCATTCACTCGCAGCACCCCACCATG  
GTACGTGCTATGCCTTAAATTACCATCGAAGTTGAATTCGGCTCCTGGTGCCTCGTGATTG

+

FFFFFF:FFFFFFFFFFFFFFFFFFFFFF:FFFFFF,FFFFFF,FFFFFFFFFFFFFFFFFFFFFF:FFFF  
F,FFFFFFFFFFFFFFFF:F,FFF:FFFFFF:FFFFFFFFFFFFFFFFFFFFFFFFFFFFFF:FF

@A00155:342:HHGFNDSXY:1:2258:1705:25300 1:N:0:GAACCTAG+TCCGCATA  
TTCTGCACCGAGAAATAATTCCTAGTCGTGGTGATATTGCTGTCATTCACTCGCAGCACCCCACCATG  
GTACGTGCTATGCCCTAAATTACCATCGAAGTTGAATTCGGCTCCTGGTGCCTCGTGATTG

+

FFFFFFFFFFFFFFFFFFFFFF,:FFF,FFFFFFFFFFFFFF,FFFFFFFF,FF:FFFF::FFFFFFFFFFFFFF  
F::FFF:F,F:FFFF:, ,FFFF:FFFFFFFF:FF:FFFFFFFFFFFFFFFFFFFFFF:FFFFFFFF

@A00155:342:HHGFNDSXY:1:2441:7048:13792 2:N:0:GAACCTAG+TCCGCATA  
TTCTGCACCGAGAAATAATTCCTAGTCGTGGTGATATTGCTGTCATTCACTCGCAGCACCCCACCATG  
GTACGTGCTATGCCTTAAATTACCATCGAAGTTGAATTCGGCTCCTGGTGCCTCGTGATTG

+

FFFFFFFF:FFFFFFFFFFFFFF,FFFFFFFF:FFFFFFFFFFFFFFFFFFFFFFFFFFFFFF  
FFFFFFFFFFFFFF:FFFFFFFFFFFFFFFFFFFFFFFFFFFFFFFFFFFFFFFFFFFFFFFF

@A00155:342:HHGFNDSXY:1:2627:4227:27477 1:N:0:GAACCTAG+TCCGCATA  
CTGCACCGAGAAATAATTCCTAGTCGTGGTTATATTGCTGTCATTCACTCGCAGCACCCCACCATGGT  
ACGTGCTATGCCTTAAATTACCATCGAAGTTGAATTCGGCTCCTGGTGCCTCGTGATT CGGGAAGA  
+  
FF:F:F,,FF,F,FFFFFF,FFFFFF:FF,F:FFFFFFFFFFFFFFF,:FF:FFFFFF:F:F:FFF  
F:FFF:F,FF:,FFFFFFFFFFFFFF:F,F:FFF:FF,FFF:FFFFFF:FFFFFFFF:F:FFFF  
@A00155:342:HHGFNDSXY:1:2426:3441:9862 2:N:0:GAACCTAG+TCCGCATA  
TGCACCGAGAAATAATTCCTAGTCGTGGTGATATTGCTGTCATTCACTCGCAGCACCCCACCATGGTA  
CGTGCTATGCCTTAAATTACCATCGAAGTTGAATTCGGCTCCTGGTGCCTCGTGATT CGGGAAGAACC  
+  
FFFFFFF,FFF:FFFFFFFFFFFFFFFFFFFFFFFFFFFFFFFFFFFFFFFFFFFFFFFFFFFFFFFFF  
FF:FFFFFFFFFFFFFF:,FFFFFFFFFFFFFFFFFFFFFFFFFFFFFFFFFFFFFFFFFFFFFFFFF  
@A00155:342:HHGFNDSXY:1:2254:18783:23844 2:N:0:GAACCTAG+TCCGCATA  
TGCACCGAGAAATAATTCCTAGTCGTGGTGATATTGCTGTCATTCACTCGCAGCACCCCACCATGGTA  
CGTGCTATGCCTTAAATTACCATCGAAGTTGAATTCGGCTCCTGGTGCCTCGTGATT CGGGAAGAACC  
+  
FFFFFFFF,FFFFFFFF:FFFF:FFFFFFFFFFFFFFFFFFFFFFFFFFFFFFFFFFFFFFFFFFFFF  
FFFFFFFFFFFF,FFFFFFFF:FFFFFFFF:FFFFFFFFFFFFFFFFFFFFFFFFFFFFFFFFFFFFF  
@A00155:342:HHGFNDSXY:1:1314:28167:12289 2:N:0:GAACCTAG+TCCGCATA  
TGCACCGAGAAATAATTCCTAGTCGTGGTGATATTGCTGTCATTCACTCGCAGCACCCCACCATGGTA  
CGTGCTATGCCTTAAATTACCATCGAAGTTGAATTCGGCTCCTGGTGCCTCGTGATT CGGGAAGAACC  
+  
FFFFFFFF:FFFFFFFFFFFFFFFFFFFFFFFFFFFFFFFFFFFFFFFFFFFFFFFFFFFFFFFFFFFFF  
FFFFFFFF:FFFFFFFFFFFFFFFFFFFFFFFFFFFFFFFFFFFFFFFFFFFFFFFFFFFFFFFFFFFFF  
@A00155:342:HHGFNDSXY:1:2143:11053:24799 2:N:0:GAACCTAG+TCCGCATA  
GCACCGAGAAATAATTCCTAGTCGTGGTGATATTGCTGTCATTCACTCGCAGCACCCCACCATGGTAC  
GTGCTATGCCTTAAATTACCATCGAAGTTGAATTCGGCTCCTGGTGCCTCGTGATT CGGGAAGAACCT  
+  
FFFFFFFFFFFFFFFFFFFFFFFFFFFFFFFFFFFFFFFFFFFFFFFFFFFFFFFFFFFFFFFFFFFFF  
FFFFFFFFFFFFFFFFFFFFFFFFFFFFFFFFFFFFFFFFFFFFFFFFFFFFFFFFFFFFFFFFFFFFF  
@A00155:342:HHGFNDSXY:1:1505:31051:14403 2:N:0:GAACCTAG+TCCGCATA  
GCACCGAGAAATAATTCCTAGTCGTGGTGATATTGCTGTCATTCACTCGCAGCACCCCACCATGGTAC  
GTGCTATGCCTTAAATTACCATCGAAGTTGAATTCGGCTCCTGGTGCCTCGTGATT CGGGAAGAACCT  
+  
FFFFFFF,FFF:FFFFFFFFF,,FFFFFFFFFFFFFFFFFFFFFFFFFFFFFFFFFFFFFFFFFFFFF  
FFFFFFFFFFFFFFFFFFFF:FFFFFF:FFF:FFFFFFFFF:F:FFFFFFF:FFF:FFFFFFFFF  
@A00155:342:HHGFNDSXY:1:1428:1561:16658 2:N:0:GAACCTAG+TCCGCATA  
CACCGAGAAATAATTCCTAGTCGTGGTGATATTGCTGTCATTCACTCGCAGCACCCCACCATGGTACG  
TGCTATGCCTTAAATTACCATCGAAGTTGAATTCGGCTCCTGGTGCCTCGTGATT CGGGAAGAACCT  
+  
FFFF,F,FFFFFF:FFFF:FF:FFFFFFFFF:,F:FFFF,FFFFFFFF:FFFFFFFFFFFF,FFF  
,FF:FFFF:FFFFFFFF:FFFFFF,F:FFF:FFFFFFFF:FFFF:FFFFFFFFFFFFFFFFF:  
@A00155:342:HHGFNDSXY:1:2267:5945:20525 2:N:0:GAACCTAG+TCCGCATA  
CACCGAGAAATAATTCCTAGTCGTGGTGATATTGCTGTCATTCACTCGCAGCACCCCACCATGGTACG  
TGCTATGCCTTAAATTACCATCGAAGTTGAATTCGGCTCCTGGTGCCTCGTGATT CGGGAAGAACCTC  
+  
FFF,FFFFFFFFF,FFFF,FFFFFFFFFFFFFFFFFFFFFFFFFFFFFFFFFFFFFFFFFFFFF:FFF  
FFFFFFFFFFFFFFFFFFFFFFFFFFFFFFFFFFFFFFFFFFFFFFFFFFFFFFFFFFFFFFFFFFFFF  
@A00155:342:HHGFNDSXY:1:2577:32506:26819 2:N:0:GAACCTAG+TCCGCATA  
CACCGAGAAAGAATTCCTAGTCGTGGTGATATTGCTGTCATTCACTCGCAGCACCCCACCATGGTACG  
TGCTATGCCTTAAATTACCATCGAAGTTGAATTCGGCTCCTGGTGCCTCGTGATT CGGGAAGAACCTC  
+  
FFFFFFFF:F:,FF,:FF:,F,FFFFFFFF,F:FFFF:FFF,FFFFFFFF:FFFFFF,F:F:FF,FFF  
FF:FF:FFFF:,F:, ,FFFFFFFFF,FF,,FFFFFFFF,FF,FFFFFFFF:F:FFFF:FFFF,FF:F

@A00155:342:HHGFNDSXY:1:2301:5303:19977 2:N:0:GAACCTAG+TCCGCATA  
CACCGAGAAATAATTCCTAGTCGTGGTGATATTGCTGTCACTCGCAGCACCCCACCATGGTACG  
TGCTATGCCTTAATTACCATCGAAGTTGAATTCGGCTCCTGGTGCCTCGTGATT CGGGAAGAACCTC  
+  
FFF,FFFFFFFF:FFFFFFFFFFFFFFFFFFFFFFFFFFFFFFFF,FFFFFFFFFFFFFFFF,FFFFFFFFF  
FFF:FFFFFFFF,FF:FFFFFF,FFFFF,FFFFFFFFFFFFFFFFFFFFFFFF:FFFFFFFFFFFFFFFF  
@A00155:342:HHGFNDSXY:1:1214:11451:26490 2:N:0:GAACCTAG+TCCGCATA  
CCGAGAAATAATTCCTAGTCGTGGTGATATTGCTGTCACTCGCAGCACCCCACCATGGTACGTG  
CTATGCCTTAATTACCATCGAAGTTGAATTCGGCTCCTGGTGCCTCGTGATT CGGGAAGAACCTCTT  
+  
FFFFFFFFFFFF:FFFFFFFFFFFFFFFF:FFFFFFFFFFFFFFFFFFFFFFFFFFFFFFFFFFFFFFFF:F  
FFFFFFFFFFFFFFFFFFFFFFFFFFFFFFFFFFFFFFFFFFFFFFFFFFFFFFFFFFFFFFFFFFFFFFFF  
@A00155:342:HHGFNDSXY:1:2146:28673:27258 1:N:0:GAACCTAG+TCCGCATA  
CCGAGAAATAATTCCTAGTCGTGGTGATATTGCTGTCACTCGCAGCACCCCACCATGGTACGTG  
CTATGCCTTAATTACCATCGAAGTTGAATTCGGCTCCTGGTGCCTCGTGATT CGGGAAGAACCTCTT  
+  
FFFF,FFFF:FFF:FFFFFFFFFFFFFFFF:FFFFFF:FFFFFFFFFFFFFFFFFFFFFFFFFFFFFFFF  
FFFF:FFF,FFF:FFF:FFF::FFFFFFFFFFFF:FFFFFFFF:FFFFFFFFFFFFFFFFFFFFFFFF  
@A00155:342:HHGFNDSXY:1:1317:4408:26381 2:N:0:GAACCTAG+TCCGCATA  
CGAGAAATAATTCCTAGTCGTGGTGATATTGCTGTCACTCGCAGCACCCCACCATGGTACGTG  
TATGCCTTAATTACCATCGAAGTTGAATTCGGCTCCTGGTGCCTCGTGATT CGGGAAGAACCT  
+  
FFFFFFFFFFFFFFFF:FFFFFFFFFFFFFFFFFFFFFFFFFFFFFFFFFFFFFFFFFFFFFFFFFFFFFFFF  
FFFFFFFFFFFFFFFFFFFFFFFFFFFFFFFFFFFFFFFF,FFFFFFFFFFFFFFFFFFFFFFFFFFFFFFF  
@A00155:342:HHGFNDSXY:1:2327:1289:20572 2:N:0:GAACCTAG+TCCGCATA  
GAGAAATAATTCCTACTCGTGGTGATATTGCTGTCACTCGCAGCACCCCACCATGGTACGTGCT  
ATGCCTTAATTACCATCGAAGTTGAATTCGGCTCCTGGTGCCTCGTGATT CGGGAAGA  
+  
,F,FFF:FF,FFF,F,,F,:,:,FFF,FF,FF:,,:FF:FFFF:FF:FFFFFFFFFFFF,:FFF,F:F  
F,FFFF:FFFF:FFFF,FFFF,,:FFF::FF:F:FF:,FF:FF,F,:FF:FFF,:FF:F  
@A00155:342:HHGFNDSXY:1:2577:32506:26819 1:N:0:GAACCTAG+TCCGCATA  
GAGAAATAATTCCTAGTCGTGGTGATATTGCTGTCACTCGCAGCACCCCACCATGGTACGTGCT  
ATGCCTTAATTACCATCGAAGTTGAATTCGGCTCCTGGTGCCTCGTGAGTCGGGAAGAACCTCTTAA  
+  
FFFFF:FFFF:FFFFFFFFFFFF:F,:FFFFFFFF:FFFFFFFFFFFF,FFFFFFFFFFFF:FFF::FFFF:  
FFFFFFFFFFFF:F:FF,FFFF,FFFF::FFFFFFFFFFFF:FFF,FFFF,FFFF,FFF:FF:F:FFF  
@A00155:342:HHGFNDSXY:1:2543:8241:9095 1:N:0:GAACCTAG+TCCGCATA  
AGAAATAATTCCTAGTCGTGGTGATATTGCTGTCACTCGCAGCACCCCACCATGGTACGTGCTA  
TGCCTTATATTACCATCGAAGTTGAATTCGGCTCCTGGTGCCTCGTGATT CGGGAAGAACCTCTTAA  
+  
FFFFFFFFFFFFFFFFFFFFFFFFFFFFFFFFFFFFFFFFFFFFFFFFFFFFFFFFFFFFFFFFFFFFFFFF  
FFFFFFFFFFFFFFFFFFFFFFFFFFFFFFFFFFFFFFFFFFFFFFFFFFFFFFFFFFFFFFFFFFFFFFFF:FFFFF  
@A00155:342:HHGFNDSXY:1:2547:10330:25864 2:N:0:GAACCTAG+TCCGCATA  
AGAAATAATTCCTAGTCGTGGTGATATTGCTGTCACTCGCAGCACCCCACCATGGTACGTGCTA  
TGCCTTAAATTACCATCGAAGTTGAATTCGGCTCCTGGTGCCTCGTGATT CGGGAAGAACCTCTTAA  
+  
FFFFFFFFFFFF,FFFFFFFFFFFFFFFFFFFFFFFFFFFFFFFFFFFFFFFFFFFFFFFF:FFFFFFFFFFFF:FFFF  
FFFFFFFFFFFFFFFFFFFFFFFFFFFFFFFFFFFFFFFFFFFFFFFFFFFFFFFFFFFFFFFFFFFFFFFF:FFFFFFFFFFFFFFFF  
@A00155:342:HHGFNDSXY:1:1563:22932:30248 2:N:0:GAACCTAG+TCCGCATA  
AGAAATAATTCCTAGTCGTGGTGATATTGCTGTCACTCGCAGCACCCCACCATGGTACGTGCTA  
TGCCTTAAATTACCATCGAAGTTGAATTCGGCTCCTGGTGCCTCGTGATT CGGGAAGAACCTCTTAA  
+

[illegible]



[illegible]

[illegible]

```
@A00155:342:HHGFNDSXY:1:1467:5575:15499 1:N:0:GAACCTAG+TCCGCATA
TCCTAGTCGTGGTGATATTGCTGTCATTCACCTCGCAGCACCCCACCATGGTACGTGCTATGCCTTA
TTACCATCGAAGTTGAATTCGGCTCCTGGTGCCTCGTGATTCGGAAGAACCTCTTAACGAAACTATC
+
FFFFFFFFFFFFFFFFFFFFF:FFFFFFFF:FFFFFFFFFFFFFFFFFFFFFFFFFFFFFFFFFFFFFFFFFFFF
FFFFFFFFFFFF:FFFFFFFFFFFFFFFFFFFFFFFFFFFFFFFFFFFFFFFFFFFFFFFFFFFFFFFFFFFFFFF
@A00155:342:HHGFNDSXY:1:1458:29875:34006 1:N:0:GAACCTAG+TCCGCATA
CTAGTCGTGGTGATATTGCTGTCATTCACCTCGCAGCACCCCACCATGGTACGTGCTATGCCTTA
TACCATCGAAGTTGAATTCGGCTCCTGGTGCCTCGTGATTCGGAAGAACCTCTTAACGAAACTATCC
+
FFFFFFFFFFFFFFFFFFFFFFFFFFFFFFFFFFFFFFFFFFFFFFFFFFFFFFFFFFFFFFFFFFFFFFFFFFFF
FFFFFFFFFFFFFFFFFFFFFFFFFFFFFFFFFFFFFFFFFFFFFFFFFFFFFFFFFFFFFFFFFFFFFFFFFFFF:FFFFFFFF:F
@A00155:342:HHGFNDSXY:1:2361:8314:14544 2:N:0:GAACCTAG+TCCGCATA
CTAGTCGTGGTGATATTGCTGTCATTCACCTCGCAGCACCCCACCATGGTACGTGCTATGCCTTA
ACCATCGAAGTTGAATTCGGCTCCTGGTGCCTCGTGATTCGGAAGAACCTCTTAACGAAACTATCC
+
F,:F:FFFFFFFFFFFF,FFFFFFFFFFFFFFFFFFFFFFFFFFFFFFFFFFFFFFFFFFFFFFFFFFFF,FF,FFFFFF,FFF,F,FFF,FF
FFFFFFFFFFFF:FFFFFFFFFFFFF,FF:FFFFFF:FFFFFFFFFFFFFFFFFFFFFFFFFFFFFFFFFFFFF
@A00155:342:HHGFNDSXY:1:1357:1796:3004 2:N:0:GAACCTAG+TCCGCATA
CTAGTCGTGGTGATATTGCTGTCATTCACCTCGCAGCACCCCACCATGGTACGTGCTATGCCTTA
ACCATCGAAGTTGAATTCGGCTCCTGGTGCCTCGTGATTCGGAAGAACCTCTTAACGAAACTATCCA
+
FFFFFFFFFFFF:FFFFFFFFFFFFFFFFFFFFFFFFFFFFFFFFFFFFFFFFFFFFFFFFFFFFFFFFFFFFF:FFFFFFFFFFFF:::
FFFFFFFFFFFFFFFFFFFFFFFFFFFFFFFFFFFFFFFFFFFFFFFFFFFFFFFFFFFFFFFFFFFFFFFFFFFFF
@A00155:342:HHGFNDSXY:1:1106:17228:13917 2:N:0:GAACCTAG+TCCGCATA
CTAGTCGTGGTGATATTGCTGTCATTCACCTCGCAGCACCCCACCATGGTACGTGCTATGCCTTA
ACCATCGAAGTTGAATTCGGCTCCTGGTGCCTCGTGATTCGGAAGAACCTCTTAACGAAACTATCCA
+
FFFFFFFFFFFFFFFFFFFF:FFFFFFFFF:FFFFFFFFF:FFFFFFFFFFFFFFFFFFFF,FFFFFFFFFFFFFFFFFFFF,F
FFFF,FFFFFFFFFFFFFFFFFFFFFFFFFFFFFFFFFFFFFFFFFFFFFFFFFFFFFFFFFFFFFFFFFFFFF:FFFFFF:FFFFFFF
@A00155:342:HHGFNDSXY:1:1207:20672:34695 2:N:0:GAACCTAG+TCCGCATA
CTAGTCGTGGTGATATTGCTGTCATTCACCTCGCAGCACCCCACCATGGTACGTGCTATGCCTTA
ACCATCGAAGTTGAATTCGGCTCCTGGTGCCTCGTGATTCGGAAGAACCTCTTAACGAAACTATCCA
+
FFFFFFFFFFFFFFFFFFFFFFFFFFFFFFFFFFFFFFFFFFFFFFFFFFFFFFFFFFFFFFFFFFFFFFFFFFFFF:
FFFFFFFFFFFFFFFFFFFFFFFFFFFFFFFFFFFFFFFFFFFFFFFFFFFFFFFFFFFFFFFFFFFFFFFFFFFF,FFFFFFFFFFFFF
@A00155:342:HHGFNDSXY:1:2217:10520:31109 2:N:0:GAACCTAG+TCCGCATA
CTAGTCGTGGTGATATTGCTGTCATTCACCTCGCAGCACCCCACCATGGTACGTGCTATGCCTTA
ACCATCGAAGTTGAATTCGGCTCCTGGTGCCTCGTGATTCGGAAGAACCTCTTAACGAAACTATCCA
+
FFFFFFFFFFFFFFFFFFFFFFFFFFFFFFFFFFFFFFFFFFFFFFFFFFFFFFFFFFFFFFFFFFFFFFFFFFFFF:
FFFFFFFFFFFFFFFFFFFFFFFFFFFFFFFFFFFFFFFFFFFFFFFFFFFFFFFFFFFFFFFFFFFFFFFFFFFFF
@A00155:342:HHGFNDSXY:1:1321:10926:36479 2:N:0:GAACCTAG+TCCGCATA
TAGTCGTGGTGATATTGCTGTCATTCACCTCGCAGCACCCCACCATGGTACGTGCTATGCCTTA
CCATCGAAGTTGAATTCGGCTCCTGGTGCCTCGTGATTCGGAAGAACCTCTTAACGAAACTATCCAT
+
FFFFFFFFFFFFFFFFFFFF:FFFFFFFFFFFFFFFFFFFFFFFFFFFFFFFFFFFFFFFFFFFFFFFFFFFFFFFFFFFF:FF
FFFFFFFFFFFFFFFFFFFFFFFFFFFFFFFFFFFFFFFFFFFFFFFFFFFFFFFFFFFFFFFFFFFFFFFFFFFFF
@A00155:342:HHGFNDSXY:1:2651:4942:19163 1:N:0:GAACCTAG+TCCGCATA
TAGTCGTGGTGATATTGCTGTCATTCACCTCGCAGCACCCCACCATGGTACGTACTATGCCTTA
CCATCGAAGTTGAATTCGGCTCCTGGTGCCTCGTGATTCGGAAGAACCTCTTAACGAAACTATCCAT
+
FFFFFFFFFFFFFFFFFFFF:FFFFFFFFFFFFFFFFFFFFFFFFFFFFFFFFFFFFFFFFFFFFFFFFFFFFFFFFFFFF:
FFFFFFFFFFFFFFFFFFFF:FFFFFFFFFFFFFFFFFFFFFFFFFFFFFFFFFFFFFFFFFFFFFFFFFFFFF
```

@A00155:342:HHGFNDSXY:1:2113:24442:18114 1:N:0:GAACCTAG+TCCGCATA  
TAGTCGTGGTGATATTGCTGTCATTCACTCGCAGCACCCCACCATGGTACGTGCTATGCCTTAAATTA  
CCATCGAAGTTGAATTCGGCTCCTGGTGCCTCGTGATTCGGAAGAACCTCTTAACGAAACTATCCAT  
+  
FFFFFFFFFFFFFFFFFFFFFFFFFFFFFFFFFFFFFFFFFFFFFFFFFFFFFFFFFFFFFFFFFFFFFFFF  
FFFFFFFFFFFFFFFFFFFFFFFFFFFFFFFFFFFFFFFFFFFFFFFFFFFFFFFFFFFFFFFFFFFFFFFF  
@A00155:342:HHGFNDSXY:1:2168:30572:29888 1:N:0:GAACCTAG+TCCGCATA  
TAGTCGTGGTGATATTGCTGTCATTCACTCGCAGCACCCCACCATGGTACGTGCTATGCCTTAAATTA  
CCATCGAAGTTGAATTCGGCTCCTGGTGCCTCGTGATTCGGAAGAACCTCTTAACGAAACTATCCAT  
+  
FFFFFFFFFFFFFFFFFFFFFFFFFFFFFFFFFFFFFFFFFFFFFFFFFFFFFFFFFFFFFFFFFFFFFFFF:FF  
FFFFFFFFFFFFFFFFFFFFFFFFFFFFFFFFFFFFFFFFFFFFFFFFFFFFFFFFFFFFFFFFFFFFFFFF:FF,FFFFFFFFFFFFFFFF  
@A00155:342:HHGFNDSXY:1:2123:19036:2268 2:N:0:GAACCTAG+TCCGCATA  
TAGTCGTGGTGATATTGCTGTCATTCACTCGCAGCACCCCACCATGGTACGTGCTATGCCTTAAATTA  
CCATCGAAGTTGAATTCGGCTCCTGGTGCCTCGTGATTCGGAAGAACCTCTTAACGAAACTATCCAT  
+  
FFFFFFFFFFFFFFFFFFFFFFFFFFFFFFFFFFFFFFFFFFFFFFFFFFFFFFFFFFFFFFFFFFFFFFFF  
:FFFFFFFFFFFFFFFFFFFFFFFFFFFFFFFFFFFFFFFFFFFFFFFFFFFFFFFFFFFFFFFFFFFFFFFF:FFF  
@A00155:342:HHGFNDSXY:1:1269:9561:29105 1:N:0:GAACCTAG+TCCGCATA  
TAGTCGTGGTGATATTGCTGTCATTCACTCGCAGCACCCCACCATGGTACGTGCTATGCCTTAAATTA  
CCATCGAAGTTGAATTCGGCTCCTGGTGCCTCGTGATTCGGAAGAACCTCTTAACGAAACTATCCAT  
+  
FFFFFFFFFFFFFFFFFFFFFFFFFFFFFFFFFFFFFFFFFFFFFFFFFFFFFFFFFFFFFFFFFFFFFFFF  
,FFFFFFFFFFFFFFFFFFFFFFFFFFFFFFFFFFFFFFFFFFFFFFFFFFFFFFFFFFFFFFFFFFFFFFFF  
,FFFFFFFFFFFFFFFFFFFFFFFFFFFFFFFFFFFFFFFFFFFFFFFFFFFFFFFFFFFFFFFFFFFFFFFF:FFFF:FFFFFFFF  
@A00155:342:HHGFNDSXY:1:2252:10963:10958 1:N:0:GAACCTAG+TCCGCATA  
TAGTCGTGGTGATATTGCTGTCATTCACTCGCAGCACCCCACCATGGTACGTGCTATGCCTTAAATTA  
CCATCGAAGTTGAATTCGGCTCCTGGTGCCTCGTGATTCGGAAGAACCTCTTAACGAAACTATCCAT  
+  
FFFFFFFFFFFFFFFFFFFFFFFFFFFFFFFFFFFFFFFFFFFFFFFFFFFFFFFFFFFFFFFFFFFFFFFF  
FFFFFFFFFFFFFFFFFFFFFFFFFFFFFFFFFFFFFFFFFFFFFFFFFFFFFFFFFFFFFFFFFFFFFFFF  
@A00155:342:HHGFNDSXY:1:1604:2799:4460 1:N:0:GAACCTAG+TCCGCATA  
TAGTCGTGGTGATATTGCTGTCATTCACTAGCAGCACCCCACCATGGTACGTGCTATGCCTTAAATTA  
CCATCGAAGTTGAATTCGGCTCCTGGTGCCTCGTGATTCGGAAGAACCTCTTAACGAAACTATCCAT  
+  
FFFFFFFFFFFF,FFFFFFFFFFFFFFFF,F,: ,FFFFFFFFFFFFFFFF:FFFFFFFFFFFFFFFFFFFFFFFF  
FFFFFFFFFFFFFFFFFFFFFFFFFFFFFFFFFFFFFFFF:FFFF,FFFF,FFFFFFFFFFFFFFFFFFFFFFFF:FFFF,F  
@A00155:342:HHGFNDSXY:1:2609:26286:2080 1:N:0:GAACCTAG+TCCGCATA  
TAGTCGTGGTGATATTGCTGTCATTCACTCGCAGCACCCCACCATGGTACGTGCTATGCCTTAAATTA  
CCATCGAAGTTGAATTCGGCTCCTGGTGCCTCGTGATTCGGAAGAACCTCTTAACGAAACTATCCAT  
+  
FFFFFFFFFFFFFFFFFFFFFFFFFFFFFFFFFFFFFFFFFFFFFFFFFFFFFFFFFFFFFFFFFFFFFFFF:FFFFFFFFFFFFFFFF  
FFFFFFFFFFFFFFFFFFFFFFFFFFFFFFFFFFFFFFFFFFFFFFFFFFFFFFFFFFFFFFFFFFFFFFFF: :FFFFFFFF  
@A00155:342:HHGFNDSXY:1:2415:31928:36558 1:N:0:GAACCTAG+TCCGCATA  
TAGTCGTGGTGATATTGCTGTCATTCACTCGCAGCACCCCACCATGGTACGTGCTATGCCTTAAATTA  
CCATCGAAGTTGAATTCGGCTCCTGGTGCCTCGTGATTCGGAAGAACCTCTTAACGAAACTATCCAT  
+  
FFFFFFFFFFFF,FFFFFFFFFFFFFFFFFFFFFFFFFFFFFFFFFFFFFFFFFFFFFFFFFFFFFFFFFFFFFFFF  
FFFFFFFFFFFFFFFFFFFFFFFFFFFFFFFFFFFFFFFFFFFFFFFFFFFFFFFFFFFFFFFFFFFFFFFF  
@A00155:342:HHGFNDSXY:1:1366:12048:13557 1:N:0:GAACCTAG+TCCGCATA  
TAGTCGTGGTGATATTGCTGTCATTCACTCGCAGCACCCCACCATGGTACGTGCTATGCCTTAAATTA  
CCATCGAAGTTGAATTCGGCTCCTGGTGCCTCGTGATTCGGAAGAACCTCTTAACGAAACTATCCAT  
+  
FFF:FFFF:FFFFFFFF:FFFFFFFFFFFFFFFF,FFFFFFFFFFFFFFFFFFFFFFFFFFFFFFFF:FFF  
FFFFFFFF: :FFFF:FFFFFFFFFFFFFFFFFFFFFFFF:FFFFFFFF:FFFF:FFFFFFFF:FFFFFFFF

[illegible]

@A00155:342:HHGFNDSXY:1:2327:1289:20572 1:N:0:GAACCTAG+TCCGCATA  
GTCGTGGTGATATTGCTGTCATTCACCTCGCAGCACCCCACCATGGTACGTGCTATGCCTTAAATTACC  
ATCGAAGTTGAATTCGGCTCCTGGTGCCTCGTGATTGCGGAAGAACCTCTTAACGAAAC

@A00155:342:HHGFNDSXY:1:2108:15374:22075 2:N:0:GAACCTAG+TCCGCATA  
TGGTGATATTGCTGTCATTTCACTCGCAGCACCCCACCATGGTACGTGCTATGCCTTA AATTACCATCG  
AAGTTGAATTCGGCTCCTGGTGCCTCGTGATT CGGGAAGA ACCTCTTAACGAAACTATCCATTACTCT  
+  
FFFFFFF:FFFFFFFFFFFFFFFFFFFFFFFFFFFFFFFFFFFFF:FFFFFFFFFFFFFFFFFFFFF:FFFFFFF  
FFFFFFFFFFFFFFFFFFFFFFFFFFFFFFFFFFFFFFFFFFFFFFFFFFFFFFFFFFFFFFFFFFFFFFFF  
@A00155:342:HHGFNDSXY:1:2457:24966:15953 2:N:0:GAACCTAG+TCCGCATA  
TGGTGATATTGCTGTCATTTCACTCGCAGCACCCCACCATGGTACGTGCTATGCCTTA AATTACCATCG  
AAGTTGAATTCGGCTCCTGGTGCCTCGTGATT CGGGAAGA ACCTCTTAACGAAACTATCCATTACTCT  
+  
FFF:FFFFFFFFF:FFFFFFFFFFFFFFFFFFFFF:FFFFFFFFFFFFFFFFFFFFF, FFF:FFF  
FFFFFFFFFFFFFFFFFFFFFFFFFFFFFFFFFFFFFFFFFFFFFFFFFFFFFFFFFFFFFFFFFFFFFFFF  
@A00155:342:HHGFNDSXY:1:1624:13331:10050 2:N:0:GAACCTAG+TCCGCATA  
TGGTGATATTGCTGTCATTTCACTCGCAGCACCCCACCATGGTACGTGCTATGCCTTA AATTACCATCG  
AAGTTGAATTCGGCTCCTGGTGCCTCGTGATT CGGGAAGA ACCTCTTAACGAAACTATCCATTACTCT  
+  
:FFFFFFFFFFFFFFFFFFFFFFFFFFFFFFFFFFFFFFFFFFFFF:FFFFFFFFFFFFF:FFFFFFFFF  
FFFFFFFFF:FFFFFFFFFFFFFFFFFFFFFFFFFFFFFFFFFFFFFFFFFFFFFFFFFFFFFFFFFFFFF, FF  
@A00155:342:HHGFNDSXY:1:1566:27073:9518 2:N:0:GAACCTAG+TCCGCATA  
TGGTGATATTGCTGTCATTTCACTCGCAGCACCCCACCATGGTACGTGCTATGCCTTA AATTACCATCG  
AAGTTGAATTCGGCTCCTGGTGCCTCGTGATT CGGGAAGA ACCTCTTAACGAAACTATCCATTACTCT  
+  
FFFFFFFFFFFFF:FFFFF:FFFFFFFFFFFFFFFFFFFFF:FFFFFFFFFFFFFFFFFFFFF  
FFF:FFFFF:FFFFF:FFFFFFFFFFFFFFFFFFFFFFFFFFFFFFFFFFFFFFFFFFFFFFFFFFFFF  
@A00155:342:HHGFNDSXY:1:2425:15275:34303 2:N:0:GAACCTAG+TCCGCATA  
TGGTGATATTGCTGTCATTTCACTCGCAGCACCCCACCATGGTACGTGCTATGCCTTA AATTACCATCG  
AAGTTGAATTCGGCTCCTGGTGCCTCGTGATT CGGGAAGA ACCTCTTAACGAAACTATCCATTACTCT  
+  
F:FFFFFFFFFFFFFFFFFFFFFFFFFFFFFFFFFFFFFFFFFFFFF:FFFFFFFFFFFFFFFFFFFFF  
FFFFFFFFFFFFFFFFFFFFFFFFFFFFFFFFFFFFFFFFFFFFFFFFFFFFFFFFFFFFFFFFFFFFFFFF  
@A00155:342:HHGFNDSXY:1:2330:13521:35712 2:N:0:GAACCTAG+TCCGCATA  
TGGTGATATTGCTGTCATTTCACTCGCAGCACCCCACCATGGTACGTGCTATGCCTTA AATTACCATCG  
AAGTTGAATTCGGCTCCTGGTGCCTCGTGATT CGGGAAGA ACCTCTTAACGAAACTATCCATTACTCT  
+  
FFFFFFFFFFFFFFFFFFFFFFFFFFFFFFFFFFFFFFFFFFFFF:FFFFFFFFFFFFFFFFFFFFF  
FFFFFFFFFFFFFFFFFFFFFFFFFFFFFFFFFFFFFFFFFFFFFFFFFFFFFFFFFFFFFFFFFFFFFFFF  
@A00155:342:HHGFNDSXY:1:2165:26431:22028 2:N:0:GAACCTAG+TCCGCATA  
TGGTGATATTGCTGTCATTTCACTCGCAGCACCCCACCATGGTACGTGCTATGCCTTA AATTACCATCG  
AAGTTGAATTCGGCTCCTGGTGCCTCGTGATT CGGGAAGA ACCTCTTAACGAAACTATCCATTACTCT  
+  
FFFFFFFFFFFFFFFFFFFFFFFFFFFFFFFFFFFFFFFFFFFFF:FFFFFFFFFFFFFFFFFFFFF  
FFFFFFFFFFFFFFFFFFFFFFFFFFFFFFFFFFFFFFFFFFFFFFFFFFFFFFFFFFFFFFFFFFFFFFFF  
@A00155:342:HHGFNDSXY:1:1509:5972:19382 2:N:0:GAACCTAG+TCCGCATA  
GTGATATTGCTGTCATTTCACTCGCAGCACCCCACCATGGTACGTGCTATGCCTTA AATTACCATCGAA  
GTTGAATTCGGCTCCTGGTGCCTCGTGATT CGGGAAGA ACCTCTTAACGAAACTATCCAT  
+  
FFF:FFFFFFFFFFFFFFFFFFFFFFFFFFFFFFFFFFFFF, FFFFFFFFFF:FFF, FFFF  
FFFFFFFFFFFFFFFFFFFFFFFFFFFFFFFFFFFFFFFFFFFFFFFFFFFFFFFFFFFFFFFFFFFFFFFF  
@A00155:342:HHGFNDSXY:1:1534:30608:21371 2:N:0:GAACCTAG+TCCGCATA  
GTGATATTGCTGTCATTTCACTCGCAGCACCCCACCATGGTACGTGCTATGCCTTA AATTACCATCGAA  
GTTGAATTCGGCTCCTGGTGCCTCGTGATT CGGGAAGA ACCTCTTAACGAAACTATCCAT  
+  
FF:FFF:FFF:FFFFFFFFFFFFFFFFFFFFFFFFFFFFFFFFFFFFF:FF:FFFFFFFFF:F::FFFFFFFFF  
FFFFF, FFFFFFFFFFFFFFFFFFFFFFFFFFFFFFFFFFFFFF:FFFFFFFFFFFFF:

@A00155:342:HHGFNDSXY:1:1214:20247:8594 2:N:0:GAACCTAG+TCCGCATA  
GTGATATTGCTGTCATTCACCTCGCAGCACCCCACCATGGTACGTGCTATGCCTTAAATTACCATCGAA  
GTTGAATTCGGCTCCTGGTGCCTCGTGATTGCGGAAGAACCTCTTAACGAAACTATCCAT

[illegible]

+

[illegible]

+

```
FFFFFFFFFFFFFFFFFFFFFFFFFFFFFFFFFFFFFFFFFFFFF,FF:FFFFFFFFFFFFFFFFFFFFFFFFF
FFFFFFFFFFFFFFF:FFFFFFFFFFFFFFFFFFFFFFFFFFFFFFFFFFFFFFFFFFFFFFFFFFFFFFFFFFFF
```

+

[illegible]

+

[illegible]

+

```

FFFFFFFFFFFFFFFFFFFFFFF:FFFFFFFF:FFF:FFFFFFFFFFFFFF:FFFFFFFFFFFFFFFFFFFFFF
FFFF,FFFFFFFFFFFF:FFFF:FFFFFFF:FF:FFFFFFF:FFFFFFFFFFFF:FF:FFFFFFFFFFFFFF

```

+

[illegible]
$$+$$
[illegible] $+$ [illegible]



ATTGCTGTCAATTCACACTCGCAGCACCCACCACCATGGTACGTGCTATGCCTTAATAATTACCATCGAAGTTGA  
ATTCGGCTCCTGGTGCCTCGTGATTTCGGGAAGAACCTCTTAACGAAACTATCCATTACTCTGAGTTTG  
+  
FFFFFFFFFFFFFFFFFFFFFFFFFFFFFFFFFFFFFFFFFFFFFFFFFFFFFFFFFFFFFFFFFFFFFFFFFFFFF  
FFFFFFFFFFFFFFFFFFFFFFFFFFFFFFFFFFFFFFFFFFFFFFFFFFFFFFFFFFFFFFFFFFFFFFFFFFFFF  
@A00155:342:HHGFNDSXY:1:1460:16197:24377 1:N:0:GAACCTAG+TCCGCATA  
ATTGCTGTCAATTCACACTCGCAGCACCCACCACCATGGTACGTGCTATGCCTTAATAATTACCATCGAAGTTGA  
ATTCGGCTCCTGGTGCCTCGTGATTTCGGGAAGAACCTCTTAACGAAACTATCCATTACTCTGAGTTTG  
+  
FFFFFFFFFFFFFFFFFFFFFFFFFFFFFFFFFFFFFFFFFFFFFFFFFFFFFFFFFFFFFFFFFFFFFFFFFFFFF  
F:FFFFFFFFFFFFFFFFFFFFFFFFFFFFFFFFFFFFFFFFFFFFFFFFFFFFFFFFFFFFFFFFFFFFFFFFFFFFF  
@A00155:342:HHGFNDSXY:1:2217:10520:31109 1:N:0:GAACCTAG+TCCGCATA  
ATTGCTGTCAATTCACACTCGCAGCACCCACCACCATGGTACGTGCTATGCCTTAATAATTACCATCGAAGTTGA  
ATTCGGCTCCTGGTGCCTCGTGATTTCGGGAAGAACCTCTTAACGAAACTATCCATTACTCTGAGTTTG  
+  
FFFFFFFFFFFFFFFFFFFFFFFFFFFFFFFFFFFFFFFFFFFFFFFFFFFFFFFFFFFFFFFFFFFFFFFFFFFFF  
FFFFFFFFFFFFFFFFFFFFFFFFFFFFFFFFFFFFFFFFFFFFFFFFFFFFFFFFFFFFFFFFFFFFFFFFFFFFF:  
@A00155:342:HHGFNDSXY:1:2361:8314:14544 1:N:0:GAACCTAG+TCCGCATA  
TTGCTGTCAATTCACACTCGCAGCACCCACCACCATGGTACGTGCTATTCCTTAATAATTACCATCGAAGTTGAA  
TTCGGCTCCTGGTGCCTCGTGATTTCGGGAAGAACCTCTTAACGAAACTATCCATTACTCTGAG  
+  
FFFFFFFFFFFFFFFFFFFFFFFFFFFFFFFFFFFFFFFFFFFFFFFFFFFFFFFFFFFFFFFFFFFFFFFFFFFFF,  
FFFF:F:FFF:FFFFFFFFFFFFFFFFFFFFFFFFFFFFFFFFFFFFFFFFFFFFFFFFFFFFFFFFFFFFFFFFFFFFF  
FFFF:FFFFFFFFFFFFFFFFFFFFFFFFFFFFFFFFFFFFFFFFFFFFFFFFFFFFFFFFFFFFFFFFFFFFFFFFFFFFF  
@A00155:342:HHGFNDSXY:1:2117:1362:15123 1:N:0:GAACCTAG+TCCGCATA  
TTGCTGTCAATTCACACTCGCAGCACCCACCACCATGGTACGTGCTATGCCTTAATAATTACCATCGAAGTTGAA  
TTCGGCTCCTGGTGCCTCGTGATTTCGGGAAGAACCTCTTAACGAAACTATCCATTACTCTGAGTTTG  
+  
FFFFFFFFFFFFFFFFFFFFFFFFFFFFFFFFFFFFFFFFFFFFFFFFFFFFFFFFFFFFFFFFFFFFFFFFFFFFF:  
FFFFFFFFFFFFFFFFFFFFFFFFFFFFFFFFFFFFFFFFFFFFFFFFFFFFFFFFFFFFFFFFFFFFFFFFFFFFF,  
FFFF,FF,FFFF:FF:FFFFFFFFFFFFFFFFFFFFFFFFFFFFFFFFFFFFFFFFFFFFFFFFFFFFFFFFFFFFF  
@A00155:342:HHGFNDSXY:1:1223:1416:11052 1:N:0:GAACCTAG+TCCGCATA  
TTGCTGTCAATTCACACTCGCAGCACCCACCACCATGGTACGTGCTATGCCTTAATAATTACCATCGAAGTTGAA  
TTCGGCTCCTGGTGCCTCGTGATTTCGGGAAGAACCTCTTAACGAAAATATCCATTACTCTGAGTTTG  
+  
FFFFFFFFFFFFFFFFFFFFFFFFFFFFFFFFFFFFFFFFFFFFFFFFFFFFFFFFFFFFFFFFFFFFFFFFFFFFF:  
FFFFFFFFFFFFFFFFFFFFFFFFFFFFFFFFFFFFFFFFFFFFFFFFFFFFFFFFFFFFFFFFFFFFFFFFFFFFF:  
@A00155:342:HHGFNDSXY:1:2644:18132:35587 1:N:0:GAACCTAG+TCCGCATA  
TTGCTGTCAATTCACACTCGCAGCACCCACCACCATGGTACGTGCTATGCCTTAATAATTACCATCGAAGTTGAA  
TTCGGCTCCTGGTGCCTCGTGATTTCGGGAAGAACCTCTTAACGAAACTATCCATTACTCTGAGTTTG  
+  
FFFFFFFFFFFFFFFFFFFFFFFFFFFFFFFFFFFFFFFFFFFFFFFFFFFFFFFFFFFFFFFFFFFFFFFFFFFFF  
FFFFFFFFFFFFFFFFFFFFFFFFFFFFFFFFFFFFFFFFFFFFFFFFFFFFFFFFFFFFFFFFFFFFFFFFFFFFF:  
@A00155:342:HHGFNDSXY:1:1658:32470:17550 1:N:0:GAACCTAG+TCCGCATA  
TTGCTGTCAATTCACACTCGCAGCACCCACCACCATGGTACGTGCTATGCCTTAATAATTACCATCGAAGTTGAA  
TTCGGCTCCTGGTGCCTCGTGATTTCGGGAAGAACCTCTTAACGAAACTATCCATTACTCTGAGTTTG  
+  
FFFF,FFFFFFFFFFFFFFFFFFFFFFFFFFFFFFFFFFFFFFFFFFFFFFFFFFFFFFFFFFFFFFFFFFFFFFFFFFFFF  
FFFFFFFFFFFFFFFFFFFFFFFFFFFFFFFFFFFFFFFFFFFFFFFFFFFFFFFFFFFFFFFFFFFFFFFFFFFFF:  
@A00155:342:HHGFNDSXY:1:2108:15374:22075 1:N:0:GAACCTAG+TCCGCATA  
TTGCTGTCAATTCACACTCGCAGCACCCACCACCATGGTACGTGCTATGCCTTAATAATTACCATCGAAGTTGAA  
TTCGGCTCCTGGTGCCTCGTGATTTCGGGAAGAACCTCTTAACGAAACTATCCATTACTCTGAGTTTG  
+  
FFFFFFFFFFFFFFFFFFFFFFFFFFFFFFFFFFFFFFFFFFFFFFFFFFFFFFFFFFFFFFFFFFFFFFFFFFFFF  
FFFFFFFFFFFFFFFFFFFFFFFFFFFFFFFFFFFFFFFFFFFFFFFFFFFFFFFFFFFFFFFFFFFFFFFFFFFFF:  
@A00155:342:HHGFNDSXY:1:2108:15374:22075 1:N:0:GAACCTAG+TCCGCATA  
TTGCTGTCAATTCACACTCGCAGCACCCACCACCATGGTACGTGCTATGCCTTAATAATTACCATCGAAGTTGAA  
TTCGGCTCCTGGTGCCTCGTGATTTCGGGAAGAACCTCTTAACGAAACTATCCATTACTCTGAGTTTG

@A00155:342:HHGFNDSXY:1:1211:12997:5588 2:N:0:GAACCTAG+TCCGCATA  
TTGCTGTCAATTCAGCAGCACCCCACCATTGGTAGTGCTATGCCTTAATTACCATCGAAGTTGAA  
TTCGGCTCCTGGTGCCTCGTGATTCGGGAAGAACCTCTTAACGAAACTATCCATTACTCTGAGTTTGC  
+  
:FF:FFFF, FF:F:FFF:FFFFFFFFFFFFFFF:FF:FFFFFF,F:FFF, FFFFFFFFFFFFFFFF::F:FFF,F:  
FFFFFF:FF:FFFFFF,FFFF,FFFFFF:F::FFFF,FFFF,FFFFFFFFF:FFFFFFF:FFFFFF:  
@A00155:342:HHGFNDSXY:1:2305:24514:10567 1:N:0:GAACCTAG+TCCGCATA  
TTGCTGTCAATTCAGCAGCACCCCACCATTGGTAGTGCTATGCCTTAATTACCATCGAAGTTGAA  
TTCGGCTCCTGGTGCCTCGTGATTCGGGAAGAACCTCTTAACGAAACTATCCATTACTCTGAGTTTGC  
+  
FFFFFFFFFFFFFFFFFFFFFFFFFFFFFFFFFFFFFFFFFFFFFFFFFFFFFFFFFFFFFFFFFFFFFFFFFFFF  
FFFFFFFFFFFFFFFFFFFFFFFFFFFFFFFFFFFFFFFFFFFFFFFFFFFFFFFFFFFFFFFFFFFFFFFFFFFF:FFFFFFFFFFFFFFFFFFFF  
@A00155:342:HHGFNDSXY:1:1360:13178:29042 1:N:0:GAACCTAG+TCCGCATA  
TTGCTGTCAATTCAGCAGCACCCCACCATTGGTAGTGCTATGCCTTAATTACCATCGAAGTTGAA  
TTCGGCTCCTGGTGCCTCGTGATTCGGGAAGAACCTCTTAACGAAACTATCCATTACTCTGAGTTTGC  
+  
FFFFFFFFFFFFFFFFFFFFFFFFFFFFFFFFFFFFFFFFFFFFFFFFFFFFFFFFFFFFFFFFFFFFFFFFFFFF  
FFFFFFFFFFFFFFFFFFFFFFFFFFFFFFFFFFFFFFFFFFFFFFFFFFFFFFFFFFFFFFFFFFFFFFFFFFFF:FFFFFFFFFFFF,FFFF  
@A00155:342:HHGFNDSXY:1:1310:17192:34710 1:N:0:GAACCTAG+TCCGCATA  
TTGCTGTCAATTCAGCAGCACCCCACCATTGGTAGTGCTATGCCTTAATTACCATCGAAGTTGAA  
TTCGGCTCCTGGTGCCTCGTGATTCGGGAAGAACCTCTTAACGAAACTATCCATTACTCTGAGTTTGC  
+  
FFFFFFFFFFFFFFFFFFFFFFFFFFFFFFFFFFFFFFFFFFFFFFFFFFFFFFFFFFFFFFFFFFFFFFFFFFFF  
FFFFFFFFFFFFFFFFFFFFFFFFFFFFFFFFFFFFFFFFFFFFFFFFFFFFFFFFFFFFFFFFFFFFFFFFFFFF:FFFFFFFFFFFFFFFFFFFF  
@A00155:342:HHGFNDSXY:1:1267:3477:10113 1:N:0:GAACCTAG+TCCGCATA  
TTGCTGTCAATTCAGCAGCACCCCACCATTGGTAGTGCTATGCCTTAATTACCATCGAAGTTGAA  
TTCGGCTCCTGGTGCCTCGTGATTCGGGAAGAACCTCTTAACGAAACTATCCATTACTCTGAGTTTGC  
+  
FFFFFFFFFFFFFFFFFFFFFFFFFFFFFFFFFFFF:FFFFFF:FFFFFFFFFFFFFFFFFFFF,FFFFFFFFFFFFFFFFFFFF  
FFFFFF:FFFFFFFFFFFFFFFFFFFF:FFFFFFFFFFFFFFFFFFFF:FFFF:FFFFFFFFFFFF,FFFFFFFFFFFF  
@A00155:342:HHGFNDSXY:1:2545:16938:4460 1:N:0:GAACCTAG+TCCGCATA  
TTGCTGTCAATTCAGCAGCACCCCACCATTGGTAGTGCTATGCCTTAATTACCATCGAAGTTGAA  
TTCGGCTCCTGGTGCCTCGTGATTCGGGAAGAACCTCTTAACGAAACTATCCATTACTCTGAGTTTGC  
+  
FFFFFFFFFFFFFFFFFFFFFFFFFFFFFFFFFFFFFFFFFFFFFFFFFFFFFFFFFFFFFFFFFFFFFFFFFFFF:FFFFF  
FFFFFFFFFFFFFFFFFFFFFFFFFFFFFFFFFFFFFFFFFFFFFFFFFFFFFFFFFFFFFFFFFFFFFFFFFFFF  
@A00155:342:HHGFNDSXY:1:2545:16595:4617 1:N:0:GAACCTAG+TCCGCATA  
TTGCTGTCAATTCAGCAGCACCCCACCATTGGTAGTGATATGCCTTAATTACCATCGAAGTTGAA  
TTCGGCTCCTGGTGCCTCGTGATTCGGGAAGAACCTCTTAACGAAACTATCCATTACTCTGAGTTTGC  
+  
FF:FFFFFFFF,FFF:FFF,FFFF,F:,FF:F:F:FFF,FFFF,FFFF:FFF:,FFF:,F:F:  
FFFFFFFFFFFF,F,: ,FFFF,FF:FFFFFFFFFFFFFFFFFFFF,FFFF,FFF:FFFF:,FFFF,FFFF  
@A00155:342:HHGFNDSXY:1:2555:20265:34773 1:N:0:GAACCTAG+TCCGCATA  
TTGCTGTCAATTCAGCAGCACCCCACCATTGGTAGTGCTATGCCTTAATTACCATCGAAGTTGAA  
TTCGGCTCCTGGTGCCTCGTGATTCGGGAAGAACCTCTTAACGAAACTATCCATTACTCTGAGTTTGC  
+  
FFFFFFFFFFFFFFFFFFFFFFFFFFFFFFFFFFFF:FFFFFFFFFFFFFFFFFFFFFFFFFFFFFFFFFFFF  
FFFFFFFFFFFFFFFFFFFFFFFFFFFFFFFFFFFFFFFFFFFFFFFFFFFFFFFFFFFFFFFFFFFFFFFFFFFF  
@A00155:342:HHGFNDSXY:1:2617:30409:15483 1:N:0:GAACCTAG+TCCGCATA  
TTGCTGTCAATTCAGCAGCACCCCACCATTGGTAGTGCTATGCCTTAATTACCATCGAAGTTGAA  
TTCGGCTCCTGGTGCCTCGTGATTCGGGAAGAACCTCTTAACGAAACTATCCATTACTCTGAGTTTGC  
+  
FFFFFFFFFFFFF:FFFFFFFFFFFFFFFFFFFFFFFFFFFFFFFFFFFFFFFFFFFFFFFFFFFFFFFFFFFFF  
FFFFFFFFFFFFFFFFFFFFFFFFFFFFFFFFFFFFFFFFFFFFFFFFFFFFFFFFFFFFFFFFFFFFFFFFFFFF:  
@A00155:342:HHGFNDSXY:1:2617:30409:15483 1:N:0:GAACCTAG+TCCGCATA  
TTGCTGTCAATTCAGCAGCACCCCACCATTGGTAGTGCTATGCCTTAATTACCATCGAAGTTGAA  
TTCGGCTCCTGGTGCCTCGTGATTCGGGAAGAACCTCTTAACGAAACTATCCATTACTCTGAGTTTGC

@A00155:342:HHGFNDSXY:1:1469:20790:7404 2:N:0:GAACCTAG+TCCGCATA  
AGCTGTCACTCACTCGCAGCACCCACCATGGTACGTGCTATGCCTTAAATTACCATCGAAGTTGAAT  
TCGGCTCCTGGTGCCTCGTGATTGCGGAAGAACCTCTTAACGAAACTATCCATTACTCT

[illegible]

@A00155:342:HHGFNDSXY:1:2239:31837:26757 1:N:0:GAACCTAG+TCCGCATA  
TGCTGTCACTCACTCGCAGCACCCACCATGGTACGTGCTATGCCTTAAATTTCCCATCGAAGTTGAAT  
TCGGCTCCTGGTGCCTCGTGATTGCGGAAGAACCTCTTAACGAAACTATCCATTACTCTGAGTTTG

F::F:FF:FFFFFFFFFFFF:F:FFF:FFFFFF:FFF:F,F:FF::FFFF:,F,,FF,F:FF:FF  
 FFFF:FF,FFF,:FFFFFF:F,,,:FFFF,F:,::,FFFFFF:FF:FF,F:,::,F,F:FFF:FFF

@A00155:342:HHGFNDSXY:1:1203:5204:3834 2:N:0:GAACCTAG+TCCGCATA  
TGCTGTCACTCACTCGCAGCACCCACCATGGTACGTGCTATGCCTTAAATTACCATCGAGGTTGAAT  
TCGGCTCCTGGTGCCTCGTGATTGCGGAAGAACCTCTTAACGAACTATCCATTACTCTGAGTTTGCT

```
FFFFFFFFFFFFFFFFFFFFFFFFFFFFFFFFFFFFFFFFFFFFFFFFFFFFF::FFFFFFFFFF:FFFFFFF  
FFFFFFFFFFFFFFFFFF:FFFFFFFFFFFFFFFFFFFFFFFFFFFFFFFFFFFFFFFFFFFFFFFFFFFFFFFF:
```

@A00155:342:HHGFNDSXY:1:2210:8079:24878 1:N:0:GAACCTAG+TCCGCATA  
TGCTGTCATTCACCTCGCAGCACCCACCATGGTACGTGCTATGCCTTAAATTACCATCGAAGTTGAAT  
TCGGCTCCTGGTGCCTCGTGATTGCGGAAGAACCTCTTAACGAACTATCCATTACTCTGAGTTTGCT

[illegible]

FFFFFFFFFFFFFFFFFFFFFFFFFFFFFFFFFFFFFFFFFFFFFFFFFFFFFFFFFFFFFFFFFFFFFFFFFFFFFFFF  
@A00155:342:HHGFNDSXY:1:2462:23800:36417 2:N:0:GAACCTAG+TCCGCATA

TGCTGTCATTCACTCGCAGCACCCCACCATGGTACGTGCTATGCCTTAAATTACCATCGAAGTTGAAT  
TCGGCTCCTGGTGCCTCGTGATTCGGAAGAACCTCTTAACGAAACTATCCATTACTCTGAGTTTGCT  
+

[illegible]

@A00155:342:HHGFNDSXY:1:1203:5023:3865 2:N:0:GAACCTAG+TCCGCATA  
TGCTGTCATTCACCTCGCAGCACCCCACCATGGTACGTGCTATGCCTTAAATTACCATCGAGGTTGAAT  
TCGGCTCCTGGTGCCTCGTGATTGCGGAAGAACCTCTTAACGAACTATCCATTACTCTGAGTTTGCT

```
+
FFFFFFFF:FFFFFFFFFFFFFFFFFFFFFFFFFFFFFFFFFFFFFFFFFFFFFFFFFFFFFFFF
```

FFFFFFFFFFFFFFFFFFFFFFFFFFFFFFFFFFFFFFFFFFFFFFFFFFFFFFFFFFFFFFFFFFFFFFFFFFFFFFFF  
@A00155:342:HHGFNDSXY:1:2503:31376:19100 1:N:0:GAACCTAG+TCCGCATA

TGCTGTCATTCACTCGCAGCACCCCACCATGGTACGTGCTATGCCTTAAATTACCATCGAAGTTGAAT  
TCGGCTCCTGGTGCCTCGTGATTCGGGAAGAACCTCTTAACGAAACTATCCATTACTCTGAGTTTGCT  
+

[illegible]

@A00155:342:HHGFNDSXY:1:1170:1723:12399 2:N:0:GAACCTAG+TCCGCATA  
TGCTGTCATTCACCTCGCAGCACCCACCATGGTACGTGCTATGCCTTAAATTACCATCGAAGTTGAAT  
TCGGCTCCTGGTGCCTCGTGATTGCGGAAGAACCTCTTAACGAACTATCCATTACTCTGAGTTTGCT

[illegible]

```

FFFFFFFFFFFFFFFFFFFFFFFFFFFFFFFFFFFFFFFFFFFFFFFFFFFFFFFFFFFFFFFF,FFFFFFFFFFFF
@A00155:342:HHGFNDSXY:1:2223:6063:35697 2:N:0:GAACCTAG+TCCGCATA

```

T G C T G T C A T T C A C T C G C A G C A C C C C A C C A T G G T A C G T G C T A T G C C T T A A A T T A C C A T C G A A G T T G A A T  
 T C G G C T C T G G T G C C T C G T G A T T C G G G A G A A C C T C T T A A C G A A A C T A T C C A T T A C T C T G A G T T T G C T

[illegible]

```
@A00155:342:HHGFNDSXY:1:1529:1027:11600 1:N:0:GAACCTAG+TCCGCATA
TGCTGTCATTCACTCGCAGCACCCCACCATGGTACGTGCTATGCCTTA AATTACCATCGAAGTTGAAT
TCGGCTCCTGGTGCCTCGTGATT CGGGAAGA ACCTCTTAACGAAACTATCCATTACTCTGAGTTTGCT
+
FFFFFFFFFFFFFFF:FFF:FFFFF:FFFF:FFFFF,FFFFFFFFFFFFFFF,,FFF:FFFFFFFFFFFFFFF
FFFFFFFFFF:FFFF:FFFFF:FFFFF:,FF:FFFFF:F:FF,:FF:FFFF:,F:FFF:F:FFFFF
@A00155:342:HHGFNDSXY:1:2274:8467:12493 1:N:0:GAACCTAG+TCCGCATA
TGCTGTCATTCACTCGCAGCACCCCACCATGGTACGTGCTATGCCTTA AATTACCATCGAAGTTGAAT
TCGGGTCCTGGTGCCTCGTGATT CGGGAAGA ACCTCTTAACGAAACTATCCATTACTCTGAGTTTGCT
+
FFFFFFFFFFFFFFFFFFFFFFFFFFFFFFFFFFFFFFFFFFFFFFFFFFFFFFFFFFFFFFFFFFFFFFFFFFFF
FFFFFFFFFFFFFFF:FFFFFFFFFFFFFFFFFFFFFFFFFFFFFFFFFFFFFFFFFFFFFFFFFFFFFFFFFFFFFFF
@A00155:342:HHGFNDSXY:1:2166:22887:30984 1:N:0:GAACCTAG+TCCGCATA
TGCTGTCATTCACTCGCAGCACCCCACCATGGTACGTGCTATGCCTTA AATTACCATCGAAGTTGAAT
TCGGCTCCTGGTGCCTCGTGATT CGGGAAGA ACCTCTTAACGAAACTATCCATTACTCTGAGTTTGCT
+
FFFFFFFFFFFFFFFFFFFFFFFFFFFFFFFFFFFFFFFFFFFFFFFFFFFFFFFFFFFFFFFFFFFFFFFFFFFF
FFFFFFFFFFFFFFFFFFFFFFFFFFFFFFFFFFFFFFFFFFFFFFFFFFFFFFFFFFFFFFFFFFFFFFFFFFFFFFF
@A00155:342:HHGFNDSXY:1:2210:5584:33583 1:N:0:GAACCTAG+TCCGCATA
TGCTGTCATTCACTCGCAGCACCCCACCATGGTACGTGCTATGCCTTA AATTACCATCGAAGTTGAAT
TCGGCTCCTGGTGCCTCGTGATT CGGGAAGA ACCTCTTAACGAAACTATCCATTACTCTGAGTTTGCT
+
FFFFFFFFFFFFFFFFFFFFFFFFFFFFFFFFFFFFFFFFFFFFFFFFFFFFFFFFFFFFFFFFFFFFFFFFFFFF
FFFFFFFFFFFFFFFFFFFFFFFFFFFFFFFFFFFFFFFFFFFFFFFFFFFFFFFFFFFFFFFFFFFFFFFFFFFFFFF
@A00155:342:HHGFNDSXY:1:1647:7961:14246 2:N:0:GAACCTAG+TCCGCATA
TGCTGTCATTCACTCGCAGCACCCCACCATGGTACGTGCTATGCCTTA AATTACCATCGAAGTTGAAT
TCGGCTCCTGGTGCCTCGTGATT CGGGAAGA ACCTCTTAACGAAACTATCCATTACTCTGAGTTTGCT
+
FFFFFFFFFFFFFFFFFFFFFFFFFFFFFFFFFFFFFFFFFFFFFFFFFFFFFFFFFFFFFFFFFFFFFFFFFFFF
FFFFFFFFFFFFFFFFFFFFFFFFFFFFFFFFFFFFFFFFFFFFFFFFFFFFFFFFFFFFFFFFFFFFFFFFFFFFFFF
@A00155:342:HHGFNDSXY:1:2143:22137:24862 2:N:0:GAACCTAG+TCCGCATA
TGCTGTCATTCACTCGCAGCACCCCACCATGGTACGTGCTATGCCTTA AATTACCATCGAAGTTGAAT
TCGGCTCCTGGTGCCTCGTGATT CGGGAAGA ACCTCTTAACGAAACTATCCATTACTCTGAGTTTGCT
+
FFFFFFFFFFFFFFFFFFFFFFFFFFFFFFFFFFFFFFFFFFFFFFFFFFFFFFFFFFFFFFFFFFFFFFFFFFFF
FFFFFFFFFFFFFFFFFFFFFFFFFFFFFFFFFFFFFFFFFFFFFFFFFFFFFFFFFFFFFFFFFFFFFFFFFFFFFFF
@A00155:342:HHGFNDSXY:1:2307:27887:34788 1:N:0:GAACCTAG+TCCGCATA
GCTGTCA TTC ACTCGCAGCACCCCACCATGGTACGTGCTATGCCTTA AATTACCATCGAAGTTGAATT
CGGCTCCTGGTGCCTCGTGATT CGGGAAGA ACCTCTTAACGAAACTATCCATTACTCTGAGTTTGCTT
+
FFFFFFFFFFFFFFFFFFFFFFFFFFFFFFFFFFFFFFFFFFFFFFFFFFFFFFFFFFFFFFFFFFFFFFFFFFFF
FFFFFFFFFFFFFFFFFFFFFFFFFFFFFFFFFFFFFFFFFFFFFFFFFFFFFFFFFFFFFFFFFFFFFFFFFFFFFFF
@A00155:342:HHGFNDSXY:1:2270:24921:3505 1:N:0:GAACCTAG+TCCGCATA
GCTGTCA TTC ACTCGCAGCACCCCACCATGGTACGTGCTATGCCTTA AATTACCATCGAAGTTGAATT
CGGCTCCTGGTGCCTCGTGATT CGGGAAGA ACCTCTTAACGAAACTATCCATTACTCTGAGTTTGCTT
+
FFFFFFFFFFFFFFFFFFFFFFFFFFFFFFFFFFFFFFFFFFFFFFFFFFFFFFFFFFFFFFFFFFFFFFFFFFFF
FFFFFFFFFFFFFFFFFFFFFFFFFFFFFFFFFFFFFFFFFFFFFFFFFFFFFFFFFFFFFFFFFFFFFFFFFFFFFFF
@A00155:342:HHGFNDSXY:1:2603:21721:29058 1:N:0:GAACCTAG+TCCGCATA
CTGTCA TTC ACTCGCAGCACCCCACCATGGTACGTGCTATGCCTTA AATTACCATCGAAGTTGAATT
GGCTCCTGGTGCCTCGTGATT CGGGAAGA ACCTCTTAACGAAACTATCCATTACTCTGAGTTTGCTT
```

[illegible]

[illegible]

[illegible]

```
@A00155:342:HHGFNDSXY:1:2548:4634:20509 2:N:0:GAACCTAG+TCCGCATA
CATTCACTCGCAGCACCCACCATGGTACGTGCTATGCCTTAAATTACCATCGAAGTTGAATTCGGCT
CCTGGTGCCTCGTGATTCGGGAAGAACCTCTTAACGAAACTATCCATTACTCTGAGTTTGCTTTTAGC
+
FF:FFFFFFFFFFFFFFFFFFFFFFFFFFFFFFFF:FFF:FFFF:FFFFFFFF,FFF:FFFFFFFFFFFFFFFF
FFFFFFFF,FFFFFFFFFFFFFFFFFFFFFFFFFFFFFFFFFFFFFFFFFFFFFFFFFFFFFFFFFFFFFFFF
@A00155:342:HHGFNDSXY:1:1146:9525:10755 1:N:0:GAACCTAG+TCCGCATA
CATTCACTCGCAGCACCCACCATGGTACGTGCTATGCCTTAAATTACCATCGAAGTTGAATTCGGCT
CCTGGTGCCTCGTGATTCGGGAAGAACCTCTTAACGAAACTATCCATTACTCTGAGTTTGCTTTTAGC
+
FFFFFFFFFFFFFFFFFFFFFFFFFFFFFFFFFFFFFFFF:FFFFFFFFFFFFFFFFFFFFFFFFFFFFFFFF
FFFFFFFF:FFFFFFFFFFFFFFFFFFFFFFFF:FFFFFFFFFFFFFFFF,FFF:FFFFFFFFFFFF:FFF:F
@A00155:342:HHGFNDSXY:1:2534:25961:10066 2:N:0:GAACCTAG+TCCGCATA
CATTCACTCGCAGCACCCACCATGGTACGTGCTATGCCTTAAATTACCATCGAAGTTGAATTCGGCT
CCTGGTGCCTCGTGATTCGGGAAGAACCTCTTAACGAAACTATCCATTACTCTGAGTTTGCTTTTAGC
+
FF,FFFFFFFFFFFFFFFFFFFFFFFFFFFFFFFFFFFFFFFFFFFFFFFFFFFFFFFFFFFFFFFFFFFFFF
FFFFFFFFFFFFFFFFFFFFFFFFFFFFFFFFFFFFFFFFFFFFFFFFFFFFFFFFFFFFFFFFFFFFFFFF
@A00155:342:HHGFNDSXY:1:2673:24008:2988 2:N:0:GAACCTAG+TCCGCATA
ATTCACCTCGCAGCACCCACCATGGTACGTGCTATGCCTTAAATTACCATCGAAGTTGAATTCGGCTC
CTGGTGCCTCGTGATTCGGGAAGAACCTCTTAACGAAACTATCCATTACTCTGAGTTTGCTTTTAGCT
+
FFFFFFFFFFFFFFFFFFFFFFFFFFFFFFFFFFFFFFFFFFFFFFFFFFFFFFFFFFFFFFFFFFFFFFFF
FFFFFFFFFFFFFFFFFFFFFFFFFFFFFFFFFFFFFFFFFFFFFFFFFFFFFFFFFFFFFFFFFFFFFFFF
@A00155:342:HHGFNDSXY:1:2504:2672:27633 2:N:0:GAACCTAG+TCCGCATA
ATTCACCTCGCAGCACCCACCATGGTACGTGCTATGCCTTAAATTACCATCGAAGTTGAATTCGGCTC
CTGGTGCCTCGTGATTCGGGAAGAACCTCTTAACGAAACTATCCATTACTCTGAGTTTGCTTTTAGCT
+
FFFFFFFFFFFFFFFFFFFFFFFF:FFF,FFFF:FFFFFFFFFFFFFFFF,FFFFFFFFFFFFFFFF:FFFF
FFFFFFFFFFFFFFFFFFFFFFFFFFFFFFFFFFFFFFFF, :FFFFFFFFFFFFFF,FFFFFFFFFFFFFFFF
@A00155:342:HHGFNDSXY:1:2240:18412:34507 1:N:0:GAACCTAG+TCCGCATA
ATTCACCTCGCAGCACCCACCATGGTACGTGCTATGCCTTAAATTACCATCGAAGTTGAATTCGGCTC
CTGGTGCCTCGTGATTCGGGAAGAACCTCTTAACGAAACTATCCATTACTCTGAGTTTGCTTTTAGCT
+
FFFFFFFFFFFFFFFFFFFF:FFFFFFFFFFFFFFFF:FFFFFFFFF:F,,FFFFFFFFFFFFFFFF:FFFF
FF:FFFFFFFFFFFFFFFFFFFFFFFFFFFFFFFFFFFFFFFF:FF:, ,FFFFF:FFFF:FFF:FFFFF:
@A00155:342:HHGFNDSXY:1:2604:2392:7138 2:N:0:GAACCTAG+TCCGCATA
ATTCACCTCGCAGCACCCACCATGGTACGTGCTATGCCTTAAATTACCATCGAAGTTGAATTCGGCTC
CTGGTGCCTCGTGATTCGGGAAGAACCTCTTAACGAAACTATCCATTACTCTGAGTTTGCTTTTAGCT
+
FFFFFFFFFFFFFFFFFFFF:F:FFFFFFFFFF:FF:FFFF:FFFFFFFFFFFF:FFFFFFFFFF:FFFF
FFFFFFFF:FFFFFFFFF:FFF:FFFF: :FFFFFFFFFFFFFFFFFFFFFFFFFFFFFFFF:FFFF
@A00155:342:HHGFNDSXY:1:1211:12997:5588 1:N:0:GAACCTAG+TCCGCATA
ATTCACCTCGCAGCACCCACCATGGTACGTGCTATGCCTTAAATTACCATCGAAGTTGAATTCGGCTC
CTGGTGCCTCGTGATTCGGGAAGAACCTCTTAACGAAACTATCCATTACTCTGAGTTTGCTTTTAGCT
+
FFFFFFFFFFFFFFFFFFFFFFFFFFFFFFFFFFFFFFFFFFFFFFFFFFFFFFFFFFFFFFFFFFFFFFFF
FFFFFFFFFFFFFFFFFFFFFFFFFFFFFFFF:FFFFFFFFFFFFFFFF:FFFFFFFFFFFFFFFFFFFFFFFF
@A00155:342:HHGFNDSXY:1:1214:20247:8594 1:N:0:GAACCTAG+TCCGCATA
TTCACTCGCAGCACCCACCATGGTACGTGCTATGCCTTAAATTACCATCGAAGTTGAATTCGGCTCC
TGGTGCCTCGTGATTCGGGAAGAACCTCTTAACGAAACTATCCATTACTCTGAGTTTGCT
+
FFFFFFFFFFFFFFFFFFFFFFFFFFFFFFFFFFFFFFFFFFFFFFFFFFFFFFFFFFFFFFFFFFFFFFFF
FFFFFFFFFFFFFFFFFFFFFFFFFFFFFFFFFFFFFFFFFFFFFFFFFFFFFFFFFFFFFFFFFFFFFFFF
@A00155:342:HHGFNDSXY:1:1214:20247:8594 1:N:0:GAACCTAG+TCCGCATA
TTCACTCGCAGCACCCACCATGGTACGTGCTATGCCTTAAATTACCATCGAAGTTGAATTCGGCTCC
TGGTGCCTCGTGATTCGGGAAGAACCTCTTAACGAAACTATCCATTACTCTGAGTTTGCT
```



$+$ 

@A00155:342:HHGFNDSXY:1:1509:5972:19382 1:N:0:GAACCTAG+TCCGCATA  
TTCACCTCGCAGCACCCACCATGGTACGTGCTATGCCTTAAATTACCATCGAAGTTGAATTCGGCTCC  
TGGTGCCTCGTGATTGCGGAAGAACCTCTTAACGAACTATCCATTACTCTGAGTTTGCT

+

@A00155:342:HHGFNDSXY:1:2673:24008:2988 1:N:0:GAACCTAG+TCCGCATA  
TTCACCTCGCAGCACCCACCATGGTACGTGCTATGCCTTAAATTACCATCGAAGTTGAATTCGGCTCC  
TGGTGCCTCGTGATTGCGGAAGAACCTCTTAACGAACTATCCATTACTCTGAGTTTGCTTTTAGCTT

+

@A00155:342:HHGFNDSXY:1:2651:4942:19163 2:N:0:GAACCTAG+TCCGCATA  
TCACTCGCAGCACCCCACCATGGTACGTACTATGCCTTAAATTACCATCGAAGTTGAATTCGGCTCCT  
GGTGCCTCGTGATTGCGGAAGAACCTCTTAACGAACTATCCATTACTCTGAGTTTGCTTTTAGCTTG

+

@A00155:342:HHGFNDSXY:1:1278:7600:8296 2:N:0:GAACCTAG+TCCGCATA  
TCACTCGCAGCACCCACCATGGTACGTGCTATGCCTTAAATTACCATCGAAGTTGAATTCGGCTCCT  
GGTGCCTCGTGATTGCGGAAGAACCTCTTAACGAACTATCCATTACTCTGAGTTTGCTTTTAGCTTG

 $+$ 

@A00155:342:HHGFNDSXY:1:2210:5584:33583 2:N:0:GAACCTAG+TCCGCATA  
CACTCGCAGCACCCACCATGGTACGTGCTATGCCTTAAATTACCATCGAAGTTGAATTCGGCTCCTG  
GTGCCTCGTGATTCCGGAAGAACCTCTTAACGAACTATCCATTACTCTGAGTTTGCTTTTAGCTTGG

 $+$ 

@A00155:342:HHGFNDSXY:1:2210:8079:24878 2:N:0:GAACCTAG+TCCGCATA  
CACTCGCAGCACCCACCATGGTACGTGCTATGCCTAAATTACCATCGAAGTTGAATTCGGCTCCTG  
GTGCCTCGTGATT CGGGAAGAACCTCTTAACGAACTATCCATTACTCTGAGTTTGCTTTTAGCTTGG

+

@A00155:342:HHGFNDSXY:1:2166:22887:30984 2:N:0:GAACCTAG+TCCGCATA  
CACTCGCAGCACCCACCATGGTACGTGCTATGCCTTAAATTACCATCGAAGTTGAATTCGGCTCCTG  
GTGCCTCGTGATTGCGGAAGAACCTCTTAACGAACTATCCATTACTCTGAGTTTGCTTTTAGCTTGG

+

@A00155:342:HHGFNDSXY:1:1467:28339:6449 2:N:0:GAACCTAG+TCCGCATA  
ACTCGCAGCACCCCACCATGGTACGTGCTATGCCTTAAATTACCATCGAAGTTGAATTCGGCTCCTGG  
TGCCTCGTGATTGCGGAAGAACCTCTTAACGAACTATCCATTACTCTGAGTTTGCTTT

+

[illegible]

[illegible]

@A00155:342:HHGFNDSXY:1:1469:20790:7404 1:N:0:GAACCTAG+TCCGCATA  
GCAGCACCCACCATGGTACGTGCTATGCCTTAAATTACCATCGAAGTTGAATTCGGCTCCTGGTGCC  
TCGTGATTCTGGAAGAACCTCTTAACGAACTATCCATTACTCTGAGTTTGCTTTTAGC

[illegible]

@A00155:342:HHGFNDSXY:1:1414:3332:31688 1:N:0:GAACCTAG+TCCGCATA  
GCAGCACCCACCATGGTACGTGCTATGCCTTAAATTACCATCGAAGTTGAATTCGGCTCCTGGTGCC  
TCGTGATTCGGAAGAACCTCTTAACGAACTATCCATTACTCTGAGTTTGCTTTTAGCTTGGGTTTCG

[illegible]

@A00155:342:HHGFNDSXY:1:2437:2944:28729 1:N:0:GAACCTAG+TCCGCATA  
GCAGCACCCACCATGGTACGTGCTATGCCTTAAATTACCATCGAAGTTGAATTCGGCTCCTGGTGCC  
TCGTGATTCTGGAAGAACCTCTTAACGAACTATCCATTACTCTGAGTTTGCTTTTAGCTTGGGTTTCG

```

FFFFFFFFFFFFFFFFFFFFFFFFFFFFFFFF:F:FFFF:FFFFFFFFFFFFFFFFFFFFFFFFFFFFFFFF,FFFF
FFFFFFFFFFFFFFFFFFFFFFFF,FFFFFFFFFFFFFFFFFFFF,F:FF:FFFFFFFFFFFF:FF,FF:FFFFFFFF,F

```

@A00155:342:HHGFNDSXY:1:2161:8214:18380 1:N:0:GAACCTAG+TCCGCATA  
CAGCACCCACCATGGTACGTGCTATGCCTTAAATTACCATCGAAGTTGAATTCGGCTCCTGGTGCCT  
CGTGATTCGGGAAGAACCTCTTAACGAAACTATCCATTACTCTGAGTTTGCTTTAGCTTGGGTTCGT

[illegible]

@A00155:342:HHGFNDSXY:1:1308:1633:14340 1:N:0:GAACCTAG+TCCGCATA  
CAGCACCCACCATGGTACGTGCTATGCCTTAAATTACCATCGAAGTTGAATTCGGCTCCTGGTGCCT  
CGTGATTCGGGAAGAACCTCTTAACGAAACTATCCATTACTCTGAGTTTGCTTTAGCTTGGGTTCGT

```

+
FFFFFFFFFFFFFFFFFFFFFFFFFFFFFFFFFFFFFFFF,FFFF:FFFFFFFF:FF:FFF:FFFFFFFFFFFFFFFFFFFFFFFF

```

```
FFF,FFFFFFFFFFFFFFFFFFFFFFFFFFFFF:FFFFFFFFFFFFFFFFFFFFFFFFFFFFFFFFFFFFF:  
@A00155:342:HHGFNDSXY:1:2303:12283:5008 1:N:0:GAACCTAG+TCCGCATA
```

CAGCACCCACCATGGTACGTGCTATGCCTTAAATTACCATCGAAGTTGAATTCGGCTCCTGGTGCCT  
CGTGATTCGGGAAGAACCTCTTAACGAACTATCCATTACTCTGAGTTTGCTTTAGCTTGGGTTCTG  
+

[illegible]

@A00155:342:HHGFNDSXY:1:2363:11641:33833 1:N:0:GAACCTAG+TCCGCATA  
CAGCACCCACCATGGTACGTGCTATGCCTTAAATTACCATCGAAGTTGAATTCGGCTCCTGGTGCCT  
CGTGATTCGGGAAGAACCTCTTAACGAAACTATCCATTACTCTGAGTTTGCTTTAGCTTGGGTTCGT

[illegible]

FFFFFFFFFFFFFFFFFFFFFFFFFFFFFFFFFFFFFFFFFFFFFFFFFFFFFFFFFFFFFFFFFFFFFFFFFFFFFFFFFFFFFFFFFFFF  
@A00155:342:HHGFNDSXY:1:2161:8142:18443 1:N:0:GAACCTAG+TCCGCATA

CAGCACCCACCATGGTACGTGCTATGCCTTAAATTACCATCGAAGTTGAATTCGGCTCCTGGTGCCT  
CGTGATTCGGGAAGAACCTCTTAACGAAACTATCCATTACTCTGAGTTTGCTTTAGCTTGGGTTCGT  
+

```

FFFFFFFFFFFFFFFFFFFFFFFFFFFFFFFFFFFFFFFFFFFFFFFFFFFFFFFFFFFFFFFF:FFFFFFFFFFFFFFFFFFFFFFFFFFFFFF
FFFFFFFFFFFFFFFFFFFFFFFFFFFFFFFFFFFFFFFF:FFFFFFFFFFFF,FFFFFFFFFFFFFFFFFFFFFFFFFFFFFFFFFFFFFFFFFFFFFFFF:FF

```

@A00155:342:HHGFNDSXY:1:2458:8341:3787 1:N:0:GAACCTAG+TCCGCATA  
CAGCACCCACCATGGTACGTGCTATGCCTTAAATTACCATCGAAGTTGAATTTCGGCTCCTGGTGCCT

CGTGATTTCGGGAAGAACCTCTTAACGAAACTATCCATTACTCTGAGTTTGCTTTTAGCTTGGGTTCGT  
+  
-

[illegible]

[illegible]

[illegible]



[illegible]

```

@A00155:342:HHGFNDSXY:1:1310:17192:34710 2:N:0:GAACCTAG+TCCGCATA
CCCACCATGGTACGTGCTATGCCTTAAATTACCATCGAAGTTGAATTCGGCTCCTGGTGCCTCGTGAT
TCGGAAGAACCTCTTAACGAAACTATCCATTACTCTGAGTTTGCTTTTAGCTTGGGTTTCGTGAGAAT
+
FFFFFFFFFFFFFFFFFFFFFFFFFFFFFFFFFFFFFFFFFFFFFFFFFFFFFFFFFFFFFFFFFFFFFFFFF:FFFFFFFFFFFFFFFFFFFFFFFFFFFFFFFFF
FFFFFFF,FFFFFFFFFFFFFFFFFFFFFFFFFFFFFFFFFFFFFFFFFFFFFFFFFFFFFFFFFFFFFFFFF:FFFFFFFFFFFFFFFFFFFFFFFFFFFFFFFFF
@A00155:342:HHGFNDSXY:1:1308:1633:14340 2:N:0:GAACCTAG+TCCGCATA
CCCACCATGGTACGTGCTATGCCTTAAATTACCATCGAAGTTGAATTCGGCTCCTGGTGCCTCGTGAT
TCGGAAGAACCTCTTAACGAAACTATCCATTACTCTGAGTTTGCTTTTAGCTTGGGTTTCGTGAGAAT
+
FFFFFFFFF:FFFF:,FFFF:FFF,FFF,F:,FF:FFFF,FFFFFFFFFFFFFFFFFFFFFFFFFFFFFFFFF:FFFFF
FFFFFFFFFFFFFFFFF:FFFF,FFFFFFFFFFFFFFFFFFFFFFFFFFFFFFFFFFFFFFFFF:FFF,FFFFFFFFFFFFF:FFFFFFFFFFFFF
@A00155:342:HHGFNDSXY:1:2429:12201:15107 2:N:0:GAACCTAG+TCCGCATA
CCCACCATGGTACGTGCTATGCCTTAAATTACCATCGAAGTTGAATTCGGCTCCTGGTGCCTCGTGAT
TCGGAAGAACCTCTTAACGAAACTATCCATTACTCTGAGTTTGCTTTTAGCTTGGGTTTCGTGAGAAT
+
FFFFFFFFFFFFFFFFFFFFFFFFF:FFFFF,FFFFFFFFFFFFFFFFFFFFFFFFF:FFFFFFFFFFFFFFFFFFFFFFFFFFFFFFFFFFFFFFFFF
FFFFFFFFFFFFFFFFFFFFFFFFF:FFFFFFFFFFFFFFFFF:FFFFFFFFFFFFFFFFFFFFFFFFFFFFFFFFFFFFFFFFFFFFFFFFFFFFFFFFF
@A00155:342:HHGFNDSXY:1:1240:1832:9424 2:N:0:GAACCTAG+TCCGCATA
CCCACCATGGTACGTGCTATGCCTTAAATTACCATCGAAGTTGAATTCGGCTCCTGGTGCCTCGTGAT
TCGGAAGAACCTCTTAACGAAACTATCCATTACTCTGAGTTTGCTTTTAGCTTGGGTTTCGTGAGAAT
+
FFFFF::,FFFFFFFFFFFFFFFFFFFFFFFFF,FFFFFFFFFFFFFFFFF:FFFFFFFFFFFFFFFFFFFFFFFFFFFFFFFFFFFFFFFFF
FFFFFFFFFFFFFFFFFFFFFFFFF,FFFFFFFFFFFFFFFFFFFFFFFFF:FFFFFFFFFFFFFFFFFFFFFFFFFFFFFFFFFFFFFFFFFFFFFFFFF
@A00155:342:HHGFNDSXY:1:2363:11641:33833 2:N:0:GAACCTAG+TCCGCATA
CCCACCATGGTACGTGCTATGCCTTAAATTACCATCGAAGTTGAATTCGGCTCCTGGTGCCTCGTGAT
TCGGAAGAACCTCTTAACGAAACTATCCATTACTCTGAGTTTGCTTTTAGCTTGGGTTTCGTGAGAAT
+
FFFFFFFFF:,FFFFF:FFFFFFFFF:F,,,F:FFFFF,FFFFFFFFFFFFFFFFFFFFFFFFFFFFFFFFFFFFFFFFF
FFFFFFFFFFFFFFFFFFFFFFFFF:FFFFFFFFFFFFFFFFFFFFFFFFFFFFFFFFFFFFFFFFFFFFFFFFF:FFFFFFFFF:FFFFFFFFFFFFF
@A00155:342:HHGFNDSXY:1:2642:2193:3787 2:N:0:GAACCTAG+TCCGCATA
CCCACCATGGTACGAGCTATGCCTTAAATTACCATCGAAGTTGAATTCGGCTCCTGGTGCCTCGTGAT
TCGGAAGAACCTCTTAACGAAACTATCCATTACTCTGAGTTTGCTTTTAGCTTGGGTTTCGTGAGAAT
+
FFFFFFFFF,FF:F,,FFFFFFFFF,:FFF:FFFFFFFFF:FF:FFFFFFFFF:FF:FFFF,F:F:,FFF::FF,
:F:,FFFFFFFFF,:FFF:FFFF:FFF:FF:FF,FFFFF:FFFF,:F:F:F:FF::FF:F:FF:FFF
@A00155:342:HHGFNDSXY:1:2120:3179:13542 1:N:0:GAACCTAG+TCCGCATA
CCACCATGGTACGTGCTATGCCTTAAATTACCATCGAAGTTGAATTCGGCTCCTGGTGCCTCGTGATT
CGGAAGAACCTCTTAACGAAACTATCCATTACTCTGAGTTTGCTTTTAGCTTGGGTTTCGTGAG
+
FFFFFFFFFFFFFFFFFFFFFFFFFFFFFFFFFFFFFFFFFFFFFFFFFFFFFFFFFFFFFFFFFFFFFFFFF
FFFFFFFFFFFFFFFFFFFFFFFFFFFFFFFFF:FFFFFFFFFFFFFFFFFFFFFFFFF:FFFFF,FFFF,FFFFFFFFFFFFF
@A00155:342:HHGFNDSXY:1:1178:26304:4805 1:N:0:GAACCTAG+TCCGCATA
CCACCATGGTACGTGCTATGCCTTAAATTACCATCGAAGTTGAATTCGGCTCCTGGTGCCTCGTGATT
CGGAAGAACCTCTTAACGAAACTATCCATTACTCTGAGTTTGCTTTTAGCTTGGGTTTCGTGAG
+
FFFFFFFFFFFFFFFFFFFFFFFFFFFFFFFFFFFFFFFFFFFFFFFFFFFFFFFFFFFFFFFFFFFFFFFFF
FFFFFFFFFFFFFFFFFFFFFFFFFFFFFFFFFFFFFFFFFFFFFFFFFFFFFFFFFFFFFFFFFFFFFFFFF
@A00155:342:HHGFNDSXY:1:1461:5249:20541 1:N:0:GAACCTAG+TCCGCATA
CCACCATGGTACGTGCTATGCCTTAAATTACCATCGAAGTTGAATTCGGCTCCTGGTGCCTCGTGATT
CGGAAGAACCTCTTAACGAAACTATCCATTACTCTGAGTTTGCTTTTAGCTTGGGTTTCGTGAG
+
FFFFFFFFFFFFFFFFFFFFFFFFFFFFFFFFF:F:FFFF:FFFFFFFF:FFFF:FFFFFFFFFFFFFFFFFFFFFFFFF
FFFFFFFFFFFFFFFFFFFFFFFFFFFFFFFFF:FFFFFFFFFFFFFFFFFFFFFFFFF:FFFFFFFFFFFFFFFFF

```



@A00155:342:HHGFNDSXY:1:1278:7600:8296 1:N:0:GAACCTAG+TCCGCATA  
CCACCATGGTACGTGCTATGCCTTAAATTACCATCGAAGTTGAATTCGGCTCCTGGTGCCTCGTGATT  
CGGGAAGAACCTCTTAACGAACTATCCATTACTCTGAGTTTGCTTTTAGCTTGGGTTCGTGAG

+

FFFFFFFFFFFFFFFFFFFFFFFFFFFFFFFFFFFFFFFFFFFFFFFFFFFFFFFFFFFFFFFFFFFFFFFF  
FFFFFFFFFFFFFFFFFFFFFFFFFFFFFFFFFFFFFFFFFFFFFFFFFFFFFFFFFFFFFFFFFFFFFFFF  
@A00155:342:HHGFNDSXY:1:1223:17173:19053 2:N:0:GAACCTAG+TCCGCATA

CCACCATGGTACGTGCTATGCCTTAAATTACCATCGAAGTTGAATTCGGCTCCTGGTGCCTCGTGATT  
CGGGAAGAACCTCTTAACGAACTATCCATTACTCTGAGTTTGCTTTTAGCTTGGGTTCGTGAGAATT

+

FFFFFFFFFFFFFFFFFFFFFFFFFFFFFFFFFFFFFFFFFFFFFFFFFFFFFFFFFFFFFFFFFFFFFFFF  
FFFFFFFFFFFFFFFFFFFFFFFFFFFFFFFFFFFFFFFFFFFFFFFFFFFFFFFFFFFFFFFFFFFFFFFF  
@A00155:342:HHGFNDSXY:1:2161:8142:18443 2:N:0:GAACCTAG+TCCGCATA

CCACCATGGTACGTGCTATGCCTTAAATTACCATCGAAGTTGAATTCGGCTCCTGGTGCCTCGTGATT  
CGGGAAGAACCTCTTAACGAACTATCCATTACTCTGAGTTTGCTTTTAGCTTGGGTTCGTGAGAATT

+

FFFFFFFFFFFF,FFFFFFFF,FFFFFF,FFFF:FFFFFFFFFFFFFFFFFFFFFFFFFFFFFFFFFFFF  
FFFFFFFFFFFFFFFFFFFFFFFFFFFFFFFFFFFFFFFFFFFFFFFFFFFFFFFFFFFFFFFFFFFFFFFF  
@A00155:342:HHGFNDSXY:1:2161:8214:18380 2:N:0:GAACCTAG+TCCGCATA

CCACCATGGTACGTGCTATGCCTTAAATTACCATCGAAGTTGAATTCGGCTCCTGGTGCCTCGTGATT  
CGGGAAGAACCTCTTAACGAACTATCCATTACTCTGAGTTTGCTTTTAGCTTGGGTTCGTGAGAATT

+

FFF:FFFFFFFFFFFFFFFFFFFFFFFFFFFFFFFFFFFFFFFFFFFFFFFFFFFFFFFFFFFFFFFFFFFF  
FFFFFFFFFFFFFFFFFFFFFFFFFFFFFFFFFFFFFFFFFFFFFFFFFFFFFFFFFFFFFFFFFFFFFFFF  
@A00155:342:HHGFNDSXY:1:1230:13096:4633 2:N:0:GAACCTAG+TCCGCATA

CCACCATGGTACGTGCTATGCCTTAAATTACCATCGAAGTTGAATTCGGCTCCTGGTGCCTCGTGATT  
CGGGAAGAACCTCTTAACGAACTATCCATTACTCTGAGTTTGCTTTTAGCTTGGGTTCGTGAGAATT

+

FFFFFF:FFFFFFFFFFFFFFFFFFFFFFFFFFFFFFFFFFFFFFFFFFFFFFFFFFFFFFFFFFFFFFFF  
FFFFFFFFFFFFFFFFFFFFFFFFFFFFFFFFFFFFFFFFFFFFFFFFFFFFFFFFFFFFFFFFFFFFFFFF  
@A00155:342:HHGFNDSXY:1:2316:19831:33990 2:N:0:GAACCTAG+TCCGCATA

CCACCATGGTACGTGCTATGCCTTAAATTACCATCGAAGTTGAATTCGGCTCCTGGTGCCTCGTGATT  
CGGGAAGAACCTCTTAACGAACTATCCATTACTCTGAGTTTGCTTTTAGCTTGGGTTCGTGAGAATT

+

FFFFFFFFFFFFFFFFFFFFFFFFFFFFFFFFFFFFFFFFFFFFFFFFFFFFFFFFFFFFFFFFFFFF:F  
FFFFFFFFFFFFFF,FFFFFFFFFFFFFFFFFFFFFFFFFFFFFFFFFFFFFFFFFFFFFFFFFFFFFFFF  
@A00155:342:HHGFNDSXY:1:2243:30617:26396 2:N:0:GAACCTAG+TCCGCATA

CACCATGGTACGTGCTATGCCTTAAATTACCATCGAAGTTGAATTCGGCTCCTGGTGCCTCGTGATTC  
GGGAAGAACCTCTTAACGAACTATCCATTACTCTGAGTTTGCTTTTAGCTTGGGTTCGTGAGA

+

FFFFFFFFFFFFFFFFFFFFFFFFFFFFFFFFFFFFFFFFFFFFFFFFFFFFFFFFFFFFFFFFFFFFF  
FFFFFFFFFFFFFFFFFFFFFFFFFFFFFFFFFFFFFFFFFFFFFFFFFFFFFFFFFFFFFFFFFFFFFFFF  
@A00155:342:HHGFNDSXY:1:1253:27688:34287 2:N:0:GAACCTAG+TCCGCATA

CACCATGGTACGTGCTATGCCTTAAATTACCATCGAAGTTGAATTCGGCTCCTGGTGCCTCGTGATTC  
GGGAAGAACCTCTTAACGAACTATCCATTACTCTGAGTTTGCTTTTAGCTTGGGTTCGTGAGAATT

+

F:FFFFFFFFFFFFFFFFFFFFFFFFFFFFFFFFFFFFFFFFFFFFFFFFFFFFFFFFFFFFFFFFFFFF  
FFFFFFFFFFFFFF:FFFFFFFFFFFFFFFFFFFFFFFFFFFFFFFFFFFFFFFFFFFFFFFFFFFFFFFF  
@A00155:342:HHGFNDSXY:1:2166:25654:14951 2:N:0:GAACCTAG+TCCGCATA

CACCATGGTACGTGCTATGCCTTAAATTACCATCGAAGTTGAATTCGGCTCCTGGTGCCTCGTGATTC  
GGGAAGAACCTCTTAACGAACTATCCATTACTCTGAGTTTGCTTTTAGCTTGGGTTCGTGAGAATT

+

FFFFF:FF:FFFFFFFFFFFF,FFFFFF:FFFFFFFFFFFFFFFFFFFFFFFFFFFFFFFFFFFFFFFF  
FFFFFFFFFFFFFFFFFFFFFFFFFFFFFFFFFFFFFFFFFFFFFFFFFFFFFFFFFFFFFFFFFFFFFFFF  
@A00155:342:HHGFNDSXY:1:2166:25654:14951 2:N:0:GAACCTAG+TCCGCATA

CACCATGGTACGTGCTATGCCTTAAATTACCATCGAAGTTGAATTCGGCTCCTGGTGCCTCGTGATTC  
GGGAAGAACCTCTTAACGAACTATCCATTACTCTGAGTTTGCTTTTAGCTTGGGTTCGTGAGAATT

[illegible]

[illegible]

@A00155:342:HHGFNDSXY:1:2263:17996:8923 1:N:0:GAACCTAG+TCCGCATA  
CATGGTACGTGCTATGCCTTAAATTACCATCGAAGTTGAATTCGGCTCCTGGTGCCTCGTGATTCTGGG  
AAGAACCTCTTAACGAAACTATCCATTACTCTGAGTTTGCTTTTAGCTTGGGTTCGTGAGAATTGAAA  
+  
FFFFFFFFFFFFFF:FFFFFFFF:FFFF,FFFFFFFF:FFFFFFFFFFFFFFFFFFFFFF:FFFF  
F:FFFFFFFFFFFFFF:FFFFFFFFFFFFFFFF:FFFFF:F:FFFFFFFFFFFFFFFFFFFFFF:FFFFF  
@A00155:342:HHGFNDSXY:1:2502:27923:13933 2:N:0:GAACCTAG+TCCGCATA  
CATGGTACGTGCTATGCCTTAAATTACCATCGAAGTTGAATTCGGCTCCTGGTGCCTCGTGATTCTGGG  
AAGAACCTCTTAACGAAACTATCCATTACTCTGAGTTTGCTTTTAGCTTGGGTTCGTGAGAATTGAAA  
+  
FFFFFFFFFFFFFF:FFFFFF:FFFFFFFF:F,FFFFFF:FFFFFFFFFFFFFFFFFFFFFFFF:FFF  
FFFFFFFFFFFFFF:FFFFF,FFFFFFFFFFFFFFFFFFFFFF:FF,FFFFFFFFFFFFFFFFFFFFFF:  
@A00155:342:HHGFNDSXY:1:1210:14977:29528 2:N:0:GAACCTAG+TCCGCATA  
CATGGTACGTGCTATGCCTTAAATTACCATCGAAGTTGAATTCGGCTCCTGGTGCCTCGTGATTCTGGG  
AAGAACCTCTTAACGAAACTATCCATTACTCTGAGTTTGCTTTTAGCTTGGGTTCGTGAGAATTGAAA  
+  
F:FFFFFFFFFFFFFFFFFFFFFFFFFFFFFFFF,FFFFFFFF:FFFFFFFFFFFFFFFFFFFFFFFF  
FFFFFFFF:FF:F:FFFFFFFFFFFFFFFFFFFFFFFFFFFFFFFFFFFFFFFFFFFFFFFFFFFFFFFF  
@A00155:342:HHGFNDSXY:1:1178:25446:1063 2:N:0:GAACCTAG+TCCGCATA  
CATGGTACGTGCTATGCCTTAAATTACCATCGAAGTTGAATTCGGCTCCTGGTGCCTCGTGATTCTGGG  
AAGAACCTCTTAACGAAACTATCCATTACTCTGAGTTTGCTTTTAGCTTGGGTTCGTGAGAATTGAAA  
+  
F,FFFF:FFFFFF,FFFFFF:::FF,FFFFFFFFFFFFFFFFFFFFFFFFFFFFFFFF:FFF  
FFFF:FFFF,FF:FFFFFFFF:FFFFFFFFFFFFFFFFFFFFFFFFFFFFFFFFFFFFFFFF  
@A00155:342:HHGFNDSXY:1:1604:2799:4460 2:N:0:GAACCTAG+TCCGCATA  
CATGGTACGTGCTATGCCTTAAATTACCATCGAAGTTGAATTCGGCTCCTGGTGCCTCGTGATTCTGGG  
AAGAACCTCTTAACGAAACTATCCATTACTCTGAGTTTGCTTTTAGCTTGGGTTCGTGAGAATTGAAA  
+  
FFF:FFFFFFFFFFFFFFFF:FF,:FFFFFFFFFFFFFFFF,FFFFFFFFFFFFFFFF:FF  
FFFFFFFF:FFF:FFFFFFFF,FFFFFFFFFFFFFFFF:FFFFFFFFFFFFFFFFFFFFFFFF  
@A00155:342:HHGFNDSXY:1:2263:17996:8923 2:N:0:GAACCTAG+TCCGCATA  
CATGGTACGTGCTATGCCTTAAATTACCATCGAAGTTGAATTCGGCTCCTGGTGCCTCGTGATTCTGGG  
AAGAACCTCTTAACGAAACTATCCATTACTCTGAGTTTGCTTTTAGCTTGGGTTCGTGAGAATTGAAA  
+  
FFFFFFFFFFFFFFFFFFFFFF:FFFFFFFFFFFFFFFFFFFFFFFFFFFFFFFFFFFFFFFFFFFFFF  
FFFFFFFFFFFFFFFFFFFFFFFFFFFFFFFFFFFFFFFFFFFFFFFFFFFFFFFFFFFFFFFF  
@A00155:342:HHGFNDSXY:1:1528:30915:10191 2:N:0:GAACCTAG+TCCGCATA  
CATGGTACGTGCTATGCCTTAAATTACCATCGAAGTTGAATTCGGCTCCTGGTGCCTCGTGATTCTGGG  
AAGAACCTCTTAACGAAACTATCCATTACTCTGAGTTTGCTTTTAGCTTGGGTTCGTGAGAATTGAAA  
+  
FFFFFFFFFFFFFFFF: ,F,FFFFFFFFFFFFFFFF:FFFFFFFF,FFFFFFFFFFFFFFFF  
FFFFFFFFFFFFFF,FFFFFFFFFFFFFF:FFFFFFFF:FFFFFFFFFFFFFFFFFFFFFFFF  
@A00155:342:HHGFNDSXY:1:2403:23782:36573 2:N:0:GAACCTAG+TCCGCATA  
CATGGTACGTGCTATGCCTTAAATTACCATCGAAGTTGAATTCGGCTCCTGGTGCCTCGTGATTCTGGG  
AAGAACCTCTTAACGAAACTATCCATTACTCTGAGTTTGCTTTTAGCTTGGGTTCGTGAGAATTGAAA  
+  
FF,FFFFFFFFFFFFFFFF:FF:FFFFFFFF:F,FFFFFFFFFFFFFFFFFFFFFFFF  
FFFFFFFFF,F:FFF:FFF:FFFFFFFFFFFFFFFF:FFFFFFFFFFFFFFFF  
@A00155:342:HHGFNDSXY:1:2517:14850:20415 2:N:0:GAACCTAG+TCCGCATA  
ATGGTACGTGCTATGCCTTAAATTACCATCGAAGTTGAATTCGGCTCCTGGTGCCTCGTGATTCTGGG  
AGAACCTCTTAACGAAACTATCCATTACTCTGAGTTTGCTTTTAGCTTGGGTTCGTGAGAATTGAAAC  
+  
FFFFFFFFFFFFFFFFFFFFFFFFFFFFFFFFFFFFFFFF:FFFFFFFFFFFFFFFF  
FFFFFFFFF:FFFFFFFFFFFFFFFFFFFFFFFFFFFFFFFFFFFFFFFF

+  
:  
FFF,:F,FF:FFFF,F:F:FFF:FFFFFFFFFFFFFFF:FFFFFFF:FF:FFFFFFFF  
FFFFFFFF:F:FFFFFFFF:FFFFF:FFF:FFFFFFFFFFFFFFFFFFFFFFFF  
@A00155:342:HHGFNDSXY:1:2330:13602:28119 2:N:0:GAACCTAG+TCCGCATA  
TGGTACGTGCTATGCCTTAATTACCATCGAAGTTGAATTCGGCTCCTGGTGCTCGTGATTTCGGAA  
GAACCTCTTAACGAAACTATCCATTACTCTGAGTTTGCTTTTAGCTTGGGTTCGTGAGAATTGAAACA

+  
FFFFFFFFFFFFFFFF:F:FFFFFFFF:FFFFFFFFFFFFFFFFFFFFFFFF  
FFFFFFFFFFFFFFFFFFFFFFFFFFFFFFFFFFFFFFFFFFFFFFFF  
@A00155:342:HHGFNDSXY:1:2247:21260:29637 2:N:0:GAACCTAG+TCCGCATA  
TGGTACGTGCTATGCCTTAATTACCATCGAAGTTGAATTCGGCTCCTGGTGCTCGTGATTTCGGAA  
GAACCTCTTAACGAAACTATCCATTACTCTGAGTTTGCTTTTAGCTTGGGTTCGTGAGAATTGAAACA

+  
F:FFFFF,FFFFFFFF:FFFFFFFFFFFFFFFFFFFFFFFFFFFFFFFF  
FFFFFFFF:FFFFFFFFFFFFFFFFFFFFFFFFFFFFFFFFFFFFFFFF  
@A00155:342:HHGFNDSXY:1:2225:2627:25426 2:N:0:GAACCTAG+TCCGCATA  
TGGTACGTGCTATGCCTTAATTACCATCGAAGTTGAATTCGGCTCCTGGTGCTCGTGATTTCGGAA  
GAACCTCTTAACGAAACTATCCATTACTCTGAGTTTGCTTTTAGCTTGGGTTCGTGAGAATTGAAACA

+  
FFFFFFFFFFFFFFFFFFFFFFFF:F:FFFFFFFFFFFFFFFFFFFFFFFF  
FFFFFFFFF:,FFFFFF:FFFFFFFFFFFFFF:FFF:FFFFFFFFFFFFFFFF  
@A00155:342:HHGFNDSXY:1:2211:15881:10582 2:N:0:GAACCTAG+TCCGCATA  
TGGTACGTGCTATGCCTTAATTACCATCGAAGTTGAATTCGGCTCCTGGTGCTCGTGATTTCGGAA  
GAACCTCTTAACGAAACTATCCATTACTCTGAGTTTGCTTTTAGCTTGGGTTCGTGAGAATTGAAACA

+  
F:FFFFF:FFFFFFFFFFFFFFFFFFFFFFFFF,FFFFFFFFFFFFFFFF  
FFFFFFFFF:FFFFFFFFFFFFFFFFFFFFFFFFFFFFFFFF  
@A00155:342:HHGFNDSXY:1:2138:21386:8343 2:N:0:GAACCTAG+TCCGCATA  
TGGTACGTGCTATGCCTTAATTACCATCGAAGTTGAATTCGGCTCCTGGTGCTCGTGATTTCGGAA  
GAACCTCTTAACGAAACTATCCATTACTCTGAGTTTGCTTTTAGCTTGGGTTCGTGAGAATTGAAACA

+  
FFFFFFFFFFFFFFFFFFFFFFFFFFFFFFFFFFFFFFFFFFFFFFFF  
FFFFFFFFFFFFFFFFFFFFFFFF:FFFFFFFFFFFFFFFFFFFFFFFF  
@A00155:342:HHGFNDSXY:1:2429:12201:15107 1:N:0:GAACCTAG+TCCGCATA  
TGGTACGTGCTATGCCTTAATTACCATCGAAGTTGAATTCGGCTCCTGGTGCTCGTGATTTCGGAA  
GAACCTCTTAACGAAACTATCCATTACTCTGAGTTTGCTTTTAGCTTGGGTTCGTGAGAATTGAAACA

+  
FFFFFFFFFFFFFFFFFFFFFFFFFFFFFFFFFFFFFFFFFFFFFFFF  
FFFFFFFFFFFFFFFFFFFFFFFF:FFFFFFFFFFFFFFFFFFFFFFFF  
@A00155:342:HHGFNDSXY:1:1574:18114:8907 2:N:0:GAACCTAG+TCCGCATA  
TGGTACGTGCTATGCCTTAATTACCATCGAAGTTGAATTCGGCTCCTGGTGCTCGTGATTTCGGAA  
GAACCTCTTAACGAAACTATCCATTACTCTGAGTTTGCTTTTAGCTTGGGTTCGTGAGAATTGAAACA

+  
FFFFFFF:FFFFFFFFFFFFFFFF:FFFFFFFFFFFFFFFF  
FFFFFFF:FFFFFFFFFFFFFFFFFFFFFFFFFFFFFFFF  
@A00155:342:HHGFNDSXY:1:1146:9525:10755 2:N:0:GAACCTAG+TCCGCATA  
TGGTACGTGCTATGCCTTAATTACCATCGAAGTTGAATTCGGCTCCTGGTGCTCGTGATTTCGGAA  
GAACCTCTTAACGAAACTATCCATTACTCTGAGTTTGCTTTTAGCTTGGGTTCGTGAGAATTGAAACA

+  
FFFFFFFFFFFFFFFFFFFFFFFF:FFFFFFFFFFFFFFFF:FFFFFFFF  
FFFFFFFFFFFFFFFFFFFFFFFF:F:FFFFFFFFFFFFFFFF

@A00155:342:HHGFNDSXY:1:1219:32750:22889 2:N:0:GAACCTAG+TCCGCATA  
TGGTACGTGCTATGCCTTAAATTACCATCGAAGTTGAATTCGGCTCCTGGTGCCTCGTGATTCTGGGAA  
GAACCTCTTAACGAAACTATCCATTACTCTGAGTTTGCTTTTAGCTTGGGTTTCGTGAGAATTGAAACA  
+  
FFFFFFFFFFFFFFFFFFFFFFFF:FFFF:FFF,FFFFFFFFFFFFFFFFFFFFFFFF:FFFFFFFFF  
FFFFFFFF:F:FFFFFFFFFFFFFFFFFFFFFFFF,FFFFFFFFFFFFFFFFFFFFFFFF  
@A00155:342:HHGFNDSXY:1:1227:10917:21746 2:N:0:GAACCTAG+TCCGCATA  
TGGTACGTGCTATGCCTTAAATTACCATCGAAGTTGAATTCGGCTCCTGGTGCCTCGTGATTCTGGGAA  
GAACCTCTTAACGAAACTATCCATTACTCTGAGTTTGCTTTTAGCTTGGGTTTCGTGAGAATTGAAACA  
+  
FFFFF,F:FFFFFF:FFFF::FFFFFFFFFFFFFFFFFFFFFFFF:FFFFFFFFFFFF:FF  
FFFFFFFFFFFFFFFFFFFFFFFF,FFFFFFFFFFFFFFFFFFFFFFFF:FFFFFFFFFFFFFFFF  
@A00155:342:HHGFNDSXY:1:1250:21766:32362 2:N:0:GAACCTAG+TCCGCATA  
TGGTACGTGCTATGCCTTAAATTACCATCGAAGTTGAATTCGGCTCCTGGTGCCTCGTGATTCTGGGAA  
GAACCTCTTAACGAAACTATCCATTACTCTGAGTTTGCTTTTAGCTTGGGTTTCGTGAGAATTGAAACA  
+  
:FFFFFFFFFFFFFFFFFFFFFFFF:FFFFFFFFFFFFFFFFFFFFFFFF:FFFFFFFFFFFFFFFF  
FFFFFFFFF:FFFFFFFFF:F:F:FFFFFFFFFFFFFFFF:FFFFFFFFFFFFFFFFFFFFFFFF  
@A00155:342:HHGFNDSXY:1:1437:25572:22388 2:N:0:GAACCTAG+TCCGCATA  
TGGTACGTGCTATGCCTTAAATTACCATCGAAGTTGAATTCGGCTCCTGGTGCCTCGTGATTCTGGGAA  
GAACCTCTTAACGAAACTATCCATTACTCTGAGTTTGCTTTTAGCTTGGGTTTCGTGAGAATTGAAACA  
+  
FFFFFFFFFFFFFFFF:FFFFFFF::F:FFFFFFFFFFFF,FFFFFFFFFFFFFFFFFFFFFFFF  
FFFFF,FFFFFFFFFFFFFFFF:F,FF,FFFFFFFFFFFFFFFF:F:FFFFFFFFFFFFFFFF  
@A00155:342:HHGFNDSXY:1:1122:19714:20917 1:N:0:GAACCTAG+TCCGCATA  
TGGTACGTGCTATGCCTTAAATTACCATCGAAGTTGAATTCGGCTCCTGGTGCCTCGTGATTCTGGGAA  
GAACCTCTTAACGAAACTATCCATTACTCTGAGTTTGCTTTTAGCTTGGGTTTCGTGAGAATTGAAACA  
+  
FFFFFFFFFFFFFFFFFFFFFFFF:FFFFFFFFFFFFFFFFFFFFFFFFFFFFFFFFFFFFFFFF,FFFFFF,  
FFFFFF:FFFFFF:FFFFFF,FFFF:FFFFFFFFFFFFFFFFFFFFFFFFFFFFFFFF:FFF  
@A00155:342:HHGFNDSXY:1:2234:6732:31407 2:N:0:GAACCTAG+TCCGCATA  
GGTACGTGCTATGCCTTAAATTACCATCGAAGTTGAATTCGGCTCCTGGTGCCTCGTGATTCTGGGAAG  
AACCTCTTAACGAAACTATCCATTACTCTGAGTTTGCTTTTAGCTTGGGTTTCGTGAGAATTGAAACA  
+  
FFFFFFFFFFFFFFFFFFFFFFFFFFFFFFFF,FFFFFFFFFFFFFF:FFFFFFFFFFFFFFFF  
FF:FFFFF:FF:FFFFFFFFFFFFFFFFFFFFFFFF:FFFFFFFFFFFFFFFFFFFFFFFF  
@A00155:342:HHGFNDSXY:1:2607:17192:1767 2:N:0:GAACCTAG+TCCGCATA  
GGTACGTGCTATGCCTTAAATTACCATCGAAGTTGAATTCGGCTCCTGGTGCCTCGTGATTCTGGGAAG  
AACCTCTTAACGAAACTATCCATTACTCTGAGTTTGCTTTTAGCTTGGGTTTCGTGAGAATTGAAACA  
+  
:FFFFF:FFFFFFFFFFFFFFFFFFFFFFFFFFFFFFFFFFFFFFFF:FFFFFFFFFFFF  
FFFFFFFFFFFF:FFFFFFFFFFFFFFFFFFFFFFFFFFFFFFFFFFFFFFFFFFFFFFFF  
@A00155:342:HHGFNDSXY:1:1458:29875:34006 2:N:0:GAACCTAG+TCCGCATA  
GGTACGTGCTATGCCTTAAATTACCATCGAAGTTGAATTCGGCTCCTGGTGCCTCGTGATTCTGGGAAG  
AACCTCTTAACGAAACTATCCATTACTCTGAGTTTGCTTTTAGCTTGGGTTTCGTGAGAATTGAAACAA  
+  
FFFFFFFFFFFFFFFFFFFFFFFF:FFFFFF:FFFFFFFFFFFFFFFFFFFFFFFF:FFFF:FFFFFFFF  
FFFFFFFFFFFFFFFFFFFFFFFF,FFFFFFFFF:FFFFFFFFFFFFFFFFFFFFFFFFFFFFFFFF  
@A00155:342:HHGFNDSXY:1:1165:15103:19132 2:N:0:GAACCTAG+TCCGCATA  
GGTACGTGCTATGCCTTAAATTACCATCGAAGTTGAATTCGGCTCCTGGTGCCTCGTGATTCTGGGAAG  
AACCTCTTAACGAAACTATCCATTACTCTGAGTTTGCTTTTAGCTTGGGTTTCGTGAGAATTGAAACAA  
+  
FFFFFFFFFFFFFFFF:FFFFFFFFF:FFF:FFFFFFFFFFFFFFFFFFFFFFFFFFFFFFFF  
FFF:FFFFFFFFFFFFFFFF:FFFFFFFFFFFFFFFFFFFFFFFFFFFFFFFF:FFFFFFFF



@A00155:342:HHGFNDSXY:1:2323:20509:12085 2:N:0:GAACCTAG+TCCGCATA  
GTACGTGCTATGCCTTAAATTACCATCGAAGTTGAATTCGGCTCCTGGTGCCTCGTGATTTCGGAAGA  
ACCTCTTAACGAAACTATCCATTACTCTGAGTTTGCTTTTAGCTTGGGTTTCGTGAGAATTGAAACA  
+  
FF:FFFFFFFFFFFFFF:FFFF,FF,FFF:FFFFFFFFFFFFFF:FF:FF:FFFFFFFFFFFFFF  
FFFFFFFF:FFFFFFFFFFFFFFFFFFFFFFFFFFFFFFFF:FFFFFFFFFFFFFFFFFFFFFFFF  
@A00155:342:HHGFNDSXY:1:2114:6976:18270 2:N:0:GAACCTAG+TCCGCATA  
TTACGTGCTATGCCTTAAATTACCATCGAAGTTGAATTCGGCTCCTGGTGCCTCGTGATTTCGGAAGA  
ACCTCTTAACGAAACTATCCATTACTCTGAGTTTGCTTTTAGCTTGGGTTTCGTGAGAATTGAAACA  
+  
,FFF,F,FF:F,,,F::F,F:,F:FFF,,FFFF,:F,F,FF:FFF:FFFF,,F,:FFF:FFF::FF,F  
F:F:FF:FF,FF,FFFFFF:,FF:F:,FFF:FFF,F,:FFF:FFFFFFFFFFFFFFFFFFFFFFFF  
@A00155:342:HHGFNDSXY:1:1201:31919:35697 2:N:0:GAACCTAG+TCCGCATA  
GTACGTGCTATGCCTTAAATTACCATCGAAGTTGAATTCGGCTCCTGGTGCCTCGTGATTTCGGAAGA  
ACCTCTTAACGAAACTATCCATTACTCTGAGTTTGCTTTTAGCTTGGGTTTCGTGAGAATTGAAACA  
+  
FFFFFFFFFFFFFFFF,FFFF:FFFF,FFFFFFFFFFFF:FFFFFFFFFFFF:FFFF,FFFFFFFFFFFFFFFF  
FFFFFFFFFFFFFFFFFFFFFFFFFFFFFFFFFFFFFFFFFFFFFFFFFFFFFFFFFFFFFFFF:FFF  
@A00155:342:HHGFNDSXY:1:2678:23104:10942 2:N:0:GAACCTAG+TCCGCATA  
GTACGTGCTATGCCTTAAATTACCATCGAAGTTGAATTCGGCTCCTGGTGCCTCGTGATTTCGGAAGA  
ACCTCTTAACGAAACTATCCATTACTCTGAGTTTGCTTTTAGCTTGGGTTTCGTGAGAATTGAAACA  
+  
FFFFFFFFFFFFFF:FFFFFFFFFFFF:FFFFFFFFFFFFFFFFFFFFFFFFFFFFFFFFFFFFFFFFFFFFF  
FFFFFFFFFFFFFFFFFFFFFFFFFFFFFFFFFFFFFFFFFFFFFFFFFFFFFFFFFFFFFFFFFFFFF  
@A00155:342:HHGFNDSXY:1:2618:7636:6731 2:N:0:GAACCTAG+TCCGCATA  
GTACGTGCTATGCCTTAAATTACCATCGAAGTTGAATTCGGCTCCTGGTGCCTCGTGATTTCGGAAGA  
ACCTCTTAACGAAACTATCCATTACTCTGAGTTTGCTTTTAGCTTGGGTTTCGTGAGAATTGAAACA  
+  
FFFFFF,FFFF,FFFFFFFF, :FFFFFFFFFFFF:FFFFFFFFFFFFFFFFFFFFFFFFFFFF,FFFF  
FFFF:FFFFFFFFFFFFFFFFFFFFFFFFFFFFFFFFFFFFFFFFFFFFFFFFFFFFFFFFFFFFF  
@A00155:342:HHGFNDSXY:1:1255:17833:12618 1:N:0:GAACCTAG+TCCGCATA  
TACGTGCTATGCCTTAAATTACCATCGAAGTTGAATTCGGCTCCTGGTGCCTCGTGATTTCGGAAGAA  
CCTCTTAACGAAACTATCCATTACTCTGAGTTTGCTTTTAGCTTGGGTTTCGTGAGAATTGAAACAAAG  
+  
,FFFF:FFF,FFF::FFFFFFFFFFFFFFFFFFFFFFFFFFFFFFFFFFFF::FF:FFFFFFFFFFFFFFFF  
FF:FFFFFFFFFFFFFFFFFFFFFFFFFFFF:FF,, :FFF,FFFF,FFFFFFFFFFFF,FFFFFFFF::F  
@A00155:342:HHGFNDSXY:1:2521:1063:4304 2:N:0:GAACCTAG+TCCGCATA  
ACGTGCTATGCCTTAAATTACCATCGAAGTTGAATTCGGCTCCTGGTGCCTCGTGATTTCGGAAGAAC  
CTCTTAACGAAACTATCCATTACTCTGAGTTTGCTTTTAGCTTGGGTTTCGTGAGAATTGAAACA  
+  
FFF,::,F,FFF:FFFF,FFFF:F:FF:FFFF:,FF,F:FFF,:FFF::FFF:F,:::FFF:FFF  
F:FF:FF:,FFFFFF:FFFFFF:F::FFFFFF,:FFFF:FFFF:FFF::FFFF:FFFF  
@A00155:342:HHGFNDSXY:1:1470:28085:24893 2:N:0:GAACCTAG+TCCGCATA  
ACGTGCTATGCCTTAAATTACCATCGAAGTTGAATTCGGCTCCTGGTGCCTCGTGATTTCGGAAGAAC  
CTCTTAACGAAACTATCCATTACTCTGAGTTTGCTTTTAGCTTGGGTTTCGTGAGAATTGAAACA  
+  
FF:F:FFFFFF,FFF,FFFF,,FFF::FFFFFFFFFFFF:F:F:FFFFFFFF:FFFFFFFF  
FFFFFFFFFFFFFFFFFFFFFFFF:FFFFFFFFFFFF:FFFFFFFFFFFFFFFFFFFFFFFF  
@A00155:342:HHGFNDSXY:1:2511:2401:30733 2:N:0:GAACCTAG+TCCGCATA  
ACGTGCTATGCCTTAAATTACCATCGAAGTTGAATTCGGCTCCTGGTGCCTCGTGATTTCGGAAGAAC  
CTCTTAACGAAACTATCCATTACTCTGAGTTTGCTTTTAGCTTGGGTTTCGTGAGAATTGAAACAAAGC  
+  
:FFFFFFFF::FFFFFFFFFFFFFFFFFFFFFFFF,FFFFFFFFFFFFFFFF:FFFFFFFF,FFFFF  
F:F,FFFFFFFFFFFFFFFFFFFFFFFF,F:FFFF::FFFFFF:FFFFFFFFFFFFFFFF



@A00155:342:HHGFNDSXY:1:1658:32470:17550 2:N:0:GAACCTAG+TCCGCATA  
ACGTGCTATGCCTTAAATTACCATCGAAGTTGAATTCGGCTCCTGGTGCCTCGTGATTGCGGAAGAAC  
CTCTTAACGAAACTATCCATTACTCTGAGTTTGCTTTTAGCTTGGGTTCTGTGAGAATTGAAACAAAGC  
+  
FFFFFFFFFFFFFF,FF,FFFFFFFFFFFFFFFFFFFFFFFFFFFFFFFFFFFFFFFFFFFFFFFFFFFFFFFF:FFF  
FFFFFF:FFFFFFFFFFFFFF:FFFFFFFFFFFFFFFFFFFFFFFFFFFFFFFFFFFFFFFFFFFFFFFFFFFFFF:FFF  
@A00155:342:HHGFNDSXY:1:1617:27561:32910 2:N:0:GAACCTAG+TCCGCATA  
ACGTGCTATGCCTTAAATTACCATCGAAGTTGAATTCGGCTCCTGGTGCCTCGTGATTGCGGAAGAAC  
CTCTTAACGAAACTATCCATTACTCTGAGTTTGCTTTTAGCTTGGGTTCTGTGAGAATTGAAACAAAGC  
+  
FFFFFFFFFFFFFFFFFFFFFFFF,FFFFFFFFFFFFFFFFFFFFFFFFFFFFFFFFFFFFFFFFFFFFFFFFFFFF  
FFF:FFFFFF:FFFFFFFFFFFFFFFFFFFFFFFF,FFFFFFFFFFFFFFFFFFFFFFFFFFFFFFFFFFFFFFFF  
@A00155:342:HHGFNDSXY:1:1165:9046:27868 2:N:0:GAACCTAG+TCCGCATA  
ACGTGCTATGCCTTAAATTACCATCGAAGTTGAATTCGGCTCCTGGTGCCTCGTGATTGCGGAAGAAC  
CTCTTAACGAAACTATCCATTACTCTGAGTTTGCTTTTAGCTTGGGTTCTGTGAGAATTGAAACAAAGC  
+  
FFFFFFFFFFF:FFFFFF:FFFFFFFFFFFFFF:::FFFFFFFFFFFFFFFFFFFFFFFFFFFFFFFFFFFFFF:FFF  
FFF:FFFFFFFF:FFFFFFFFFFFFFFFFFFFFFFFFFFFFFFFFFFFFFFFFFFFFFFFFFFFFFFFF: ,FFFFF  
@A00155:342:HHGFNDSXY:1:1135:10963:5102 2:N:0:GAACCTAG+TCCGCATA  
CGTGCTATGCCTTAAATTACCATCGAAGTTGAATTCGGCTCCTGGTGCCTCGTGATTGCGGAAGAACC  
TCTTAACGAAACTATCCATTACTCTGAGTTTGCTTTTAGCTTGGGTTCTGTGAGAATTGAAACAAAGCT  
+  
FFFFFFFFFFFFFFF::FFFFFFFFFFFFFFFFFFFFFFFFFFFFFFFFFFFFFFFFFFFFFFFFFFFFFFFFFFFF  
FF:FFFFFFFFFFFFFFFFFFFFFFFFFFFFFFFF,FFFFFFFFFFFFFFFFFFFFFFFFFFFFFFFFFFFFFF:FFFFF  
@A00155:342:HHGFNDSXY:1:2205:32389:34131 2:N:0:GAACCTAG+TCCGCATA  
CGTGCTATGCCTGAAATTACCATCGAAGTTGAATTCGGCTCCTGGTGCCTCGTGATTGCGGAAGAACC  
TCTTAACGAAACTATCCATTACTCTGAGTTTGCTTTTAGCTTGGGTTCTGTGAGAATTGAAACAAAGCT  
+  
FFFFF,FFFFFF,F,,,:FFFFFF::FFFFFF::FFFFF:FFFF:FFF:FFFFFF:FFFF:FFF:F  
FFFF:FFFF,FFFFFFFFFFFF:FFFFFF,,FFFF:, :FF:FFFF:FFFFFFFFFFFF:,FFFFFFFF  
@A00155:342:HHGFNDSXY:1:2459:22128:22874 2:N:0:GAACCTAG+TCCGCATA  
CGTGCTATGCCTTAAATTACCATCGAAGTTGAATTCGGCTCCTGGTGCCTCGTGATTGCGGAAGAACC  
TCTTAACGAAACTATCCATTACTCTGAGTTTGCTTTTAGCTTGGGTTCTGTGAGAATTGAAACAAAGCT  
+  
FFFF:FFFF:FFFF:FFFFFFFFFFFFFFFFFFFFFFFFFFFFFFFFFFFFFFFFFFFFFFFFFFFFFFFFFFFF:FFFFFFFFFFFF  
FFFFFFFFFFFFFFFFFFFFFFFFFFFFFFFFFFFFFFFFFFFFFFFFFFFFFFFFFFFFFFFFFFFFFFFFFFFF  
@A00155:342:HHGFNDSXY:1:1526:10303:15389 2:N:0:GAACCTAG+TCCGCATA  
CGTGCTATGCCTTAAATTACCATCGAAGTTGAATTCGGCTCCTGGTGCCTCGTGATTGCGGAAGAACC  
TCTTAACGAAACTATCCATTACTCTGAGTTTGCTTTTAGCTTGGGTTCTGTGAGAATTGAAACAAAGCT  
+  
FFFFFFFFFFFFFFFFFFFF:FFFF:FFFFFFFFFFFFFFFFFFFFFFFFFFFFFFFFFFFFFFFFFFFFFFFFFFFF  
FF:FFFFFFFFFFFFFFFFFFFFFFFFFFFFFFFFFFFFFFFFFFFFFFFFFFFFFFFFFFFFFFFFFFFFFFFF  
@A00155:342:HHGFNDSXY:1:2459:26666:23657 2:N:0:GAACCTAG+TCCGCATA  
CGTGCTATGCCTTAAATTACCATCGAAGTTGAATTCGGCTCCTGGTGCCTCGTGATTGCGGAAGAACC  
TCTTAACGAAACTATCCATTACTCTGAGTTTGCTTTTAGCTTGGGTTCTGTGAGAATTGAAACAAAGCT  
+  
FFFF:FFFFFFFFFFFFFFFFFFFFFFFFFFFFFFFFFFFFFFFFFFFFFFFFFFFFFFFFFFFFFFFFFFFF  
FFFFFFFFFFFFFFFFFFFFFFFFFFFFFFFFFFFFFFFFFFFFFFFFFFFFFFFFFFFFFFFFFFFFFFFFFFFF  
@A00155:342:HHGFNDSXY:1:1644:27787:14732 2:N:0:GAACCTAG+TCCGCATA  
CGTGCTATGCCTTAAATTACCATCGAAGTTGAATTCGGCTCCTGGTGCCTCGTGATTGCGGAAGAACC  
TCTTAACGAAACTATCCATTACTCTGAGTTTGCTTTTAGCTTGGGTTCTGTGAGAATTGAAACAAAGCT  
+  
FFFFFFFFFFFFFFF:FF:FFFFFFFFFFFFFFFFFFFFFFFFFFFFFFFFFFFFFFFFFFFFFFFFFFFFFFFF  
FF:F,FFFFFFFFFFFFFFFF:FFFFFF:FF,FFFFFFFFFFFF,FFFFFFFFFFFFFFFFFFFFFFFF:FFFFFFF



$+$  $+$ 

+

+

+

+

+

 $+$  $\pm$ 

\_\_\_\_\_

[illegible]

@A00155:342:HHGFNDSXY:1:2456:32786:7607 2:N:0:GAACCTAG+TCCGCATA  
GTGCTATGCCTTAAATTACCATCGAAGTTGAATTCGGCTCCTGGTGCCTCGTGATTTCGGAAGAACCT  
CTTAACGAAACTATCCATTACTCTGAGTTTGCTTTTAGCTTGGGTTCTGAGAATTGAAACAAAGCTT  
+  
F:FFFFFFFFFFFFFFFFFFFFFFFFFFFFFFFFFFFFFFFFFFFFFFFFFFFFFFFFFFFFFFFFFFFFFFFFF  
FFFFFFFFFFFFFFFFFFFFFFFFFFFFFFFFFFFFFFFFFFFFFFFFFFFFFFFFFFFFFFFFFFFFFFFFF  
@A00155:342:HHGFNDSXY:1:1333:30427:32236 2:N:0:GAACCTAG+TCCGCATA  
GTGCTATGCCTTAAATTACCATCGAAGTTGAATTCGGCTCCTGGTGCCTCGTGATTTCGGAAGAACCT  
CTTAACGAAACTATCCATTACTCTGAGTTTGCTTTTAGCTTGGGTTCTGAGAATTGAAACAAAGCTT  
+  
FFFFFFFFFFFFFFFFFFFFFFFFFFFFFFFFFFFFFFFFFFFFFFFFFFFFFFFFFFFFFFFFFFFFFFFFF  
FF:F:FFFFFFFFFFFFFFFFFFFFFFFFFFFFFFFFFFFFFFFFFFFFFFFFFFFFFFFFFFFFFFFFFFFFF  
@A00155:342:HHGFNDSXY:1:1402:1759:6605 2:N:0:GAACCTAG+TCCGCATA  
GTGCTATGCCTTAAATTACCATCGAAGTTGAATTCGGCTCCTGGTGCCTCGTGATTTCGGAAGAACCT  
CTTAACGAAACTATCCATTACTCTGAGTTTGCTTTTAGCTTGGGTTCTGAGAATTGAAACAAAGCTT  
+  
FFF:FFFF,FFFFFF,FFF:FFFFFF,FFFFFFFF:FFFFFFFFFFFF:F:FFFFFFFFFFFFFFFFF:  
,FFFFFFFFFFFF:FFF:FFF:FFF:FFF,:FFF,FFFFFFFFF:FFFFFFFFFFFFFFFF:FFF  
@A00155:342:HHGFNDSXY:1:1377:12635:12602 2:N:0:GAACCTAG+TCCGCATA  
GTGCTATGCCTTAAATTACCATCGAAGTTGAATTCGGCTCCTGGTGCCTCGTGATTTCGGAAGAACCT  
CTTAACGAAACTATCCATTACTCTGAGTTTGCTTTTAGCTTGGGTTCTGAGAATTGAAACAAAGCTT  
+  
FFFFFFFFFFFFFFFFFFFFFFFFFFFF:FFFF::FFFF:FFFFFFFFFFFFFFFFFFFFFFFF:FFFFFFFFFFFFFFFFF  
FFFFFFFFFFFFFFFFFFFF::FFFFFFFFFFFFFFFFFFFFFFFFFFFFFFFFFFFFFFFFFFFFFFFFFFFFF  
@A00155:342:HHGFNDSXY:1:1377:12491:12101 2:N:0:GAACCTAG+TCCGCATA  
GTGCTATGCCTTAAATTACCATCGAAGTTGAATTCGGCTCCTGGTGCCTCGTGATTTCGGAAGAACCT  
CTTAACGAAACTATCCATTACTCTGAGTTTGCTTTTAGCTTGGGTTCTGAGAATTGAAACAAAGCTT  
+  
FFFFF:F,F:FF,: ,FFFFFFFF,:FF:FFFFFFFF:FFFF:FF:FF:FFFF:FFFF:FFFF,FF,F,  
F:FFF,FFF:FF,:F,:FFFFFFFFFFFFFFFFFFFF,FFFFFF:FFF:F,FFF:FFFF:FF:F,F:FFF  
@A00155:342:HHGFNDSXY:1:1355:18692:3834 2:N:0:GAACCTAG+TCCGCATA  
GTGCTATGCCTTAAATTACCATCGAAGTTGAATTCGGCTCCTGGTGCCTCGTGATTTCGGAAGAACCT  
CTTAACGAAACTATCCATTACTCTGAGTTTGCTTTTAGCTTGGGTTCTGAGAATTGAAACAAAGCTT  
+  
FFFFFFFFFFFFFFFFFFFFFFFFFFFFFFFFFFFFFFFFFFFFFFFFFFFFFFFFFFFFFFFFFFFFFFFFF  
FFFFFFFFFFFFFFFFFFFFFFFFFFFFFFFFFFFFFFFFFFFFFFFFFFFFFFFFFFFFFFFFFFFFFFFFF  
@A00155:342:HHGFNDSXY:1:1219:32750:22889 1:N:0:GAACCTAG+TCCGCATA  
TGCTATGCCTTAAATTACCATCGAAGTTGAATTCGGCTCCTGGTGCCTCGTGATTTCGGAAGAACCTC  
TTAACGAAACTATCCATTACTCTGAGTTTGCTTTTAGCTTGGGTTCTGAGAATTGAAACAAAGCTTA  
+  
FFFFFFF:FFFFFFFFFFFFFFFFFFFFFFFFFFFFFFFFFFFFFFFFFFFFFFFFFFFFFFFFFFFFFFFFF  
FFFFFFFFFFFF:FFFFFFFFFFFFFFFFFFFF,F:FFFFFFFFFFFFFFFF:FFFFFFFFFFFFFFFFFFFF:F  
@A00155:342:HHGFNDSXY:1:2248:29658:22670 2:N:0:GAACCTAG+TCCGCATA  
GCTATGCCTTAAATTACCATCGAAGTTGAATTCGGCTCCTGGTGCCTCGTGATTTCGGAAGAACCTCT  
TAACGAAACTATCCATTACTCTGAGTTTGCTTTTAGCTTGGGTTCTGAGAATTGAAACA  
+  
:FFFFF:FFFFFFFFF::FF:FFFFFFFFFFFFFFFFFFFFFFFFFFFFFFFF:FFF:FF:FFFFF:FF:FFFFF  
F:FFFFFFFFF:FFFFFFFFF:FFFF:FFFFFFFFFFFFFFFFFFFFFFFF:FFFFFFFFFFFF  
@A00155:342:HHGFNDSXY:1:2558:1750:34867 2:N:0:GAACCTAG+TCCGCATA  
GCTATGCCTTAAATTACCATCGAAGTTGAATTCGGCTCCTGGTGCCTCGTGATTTCGGAAGAACCTCT  
TAACGAAACTATCCATTACTCTGAGTTTGCTTTTAGCTTGGGTTCTGAGAATTGAAACAAAGC  
+  
FFFFFFFFFFFF,F:,FFF,:FFFFFFFFF:,F,F:FFFFFFFF::FFFFF,FFF,FFFFFFFFFFFFF  
:::FFFFFFFFFFFF,:FFFF:FFFF:F:FFFF:FF:F:FFFFFFFFFFFF::,FF:FFF:FFF

@A00155:342:HHGFNDSXY:1:1326:11469:33630 2:N:0:GAACCTAG+TCCGCATA  
GCTATGCCTTAAATTACCATCGAAGTTGAATTCGGCTCCTGGTGCCTCGTGATTTCGGAAGAACCTCT  
TAACGAAACTATCCATTACTCTGAGTTTGCTTTTAGCTTGGGTTTCGTGAGAATTGAAACAAAGC

+

FFFFFF:FFFFFFFFFFFFFF:FFFFFFFFFFFFFF:FFFFFFFF:FF,FFFFFFFF  
FFFFFFFFFFFFFF:FFFFFFFF:FFFFFFFFFFFFFF,FFFFFFFFFFFFFF

@A00155:342:HHGFNDSXY:1:1530:18313:8124 2:N:0:GAACCTAG+TCCGCATA  
GCTATGCCTTAAATTACCATCGAAGTTGAATTCGGCTCCTGGTGCCTCGTGATTTCGGAAGAACCTCT  
TAACGAAACTATCCATTACTCTGAGTTTGCTTTTAGCTTGGGTTTCGTGAGAATTGAAACAAAGCT

+

FFFFFFFFFFFFFFFF:FFFFFFFFFFFFFFFF,FFFFFFFFFFFFFFFF  
FFFFFFFFFFFFFFFF:FFFFFFFFFFFFFFFFFFFFFFFFFFFFFFFF

@A00155:342:HHGFNDSXY:1:2359:21251:2159 2:N:0:GAACCTAG+TCCGCATA  
GCTATGCCTTAAATGACCATCGAAGTTGAATTCGGCTCCTGGTGCCTCGTGATTTCGGAAGAACCTCT  
TAACGAAACTATCCATTACTCTGAGTTTGCTTTTAGCTTGGGTTTCGTGAGAATTGAAACAAAGCTT

+

FFFFFFFF:F,FF,FFFFFFFF,FFFFFFFFFFFFFFFFFFFFFFFFFFFFFFFF,FF  
FFFFFFFFFFFFFFFFFFFFFFFFFFFFFFFFFFFFFFFFFFFFFFFFFFFFFFFF

@A00155:342:HHGFNDSXY:1:1453:22516:2409 2:N:0:GAACCTAG+TCCGCATA  
CTATGCCTTAAATTACCATCGAAGTTGAATTCGGCTCCTGGTGCCTCGTGATTTCGGAAGAACCTCT  
AACGAAACTATCCATTACTCTGAGTTTGCTTTTAGCTTGGGTTTCGTGAGAATTGAAACAA

+

FFFFF:FFFF,FFFF,FFFF:FFFFFFFFFFFFFFFF,FFFFF:FFFFFFFFFFFFFFFF  
FFFFFFFF:FFFFFFFFFFFFFF:FFFFFFFFFFFFFFFFFFFFFFFF

@A00155:342:HHGFNDSXY:1:2472:30770:2300 2:N:0:GAACCTAG+TCCGCATA  
CTATGCCTTAAATTACCATCGAAGTTGAATTCGGCTCCTGGTGCCTCGTGATTTCGGAAGAACCTCT  
AACGAAACTATCCATTACTCTGAGTTTGCTTTTAGCTTGGGTTTCGTGAGAATTGAAACAA

+

FF:FFFFFF:FFFFFF:FFFF:FFFFFFFFFFFFFFFFFFFFFFFFFFFFFFFF:FF  
FFFFFFFFFFFFFFFFFFFFFFFFFFFFFFFFFFFFFFFFFFFFFFFF

@A00155:342:HHGFNDSXY:1:1232:4209:10410 2:N:0:GAACCTAG+TCCGCATA  
CTATGCCTTAAATTACCATCGAAGTTGAATTCGGCTCCTGGTGCCTCGTGATTTCGGAAGAACCTCT  
AACGAAACTATCCATTACTCTGAGTTTGCTTTTAGCTTGGGTTTCGTGAGAATTGAAACAAAGCTT

+

FFFFFFFFFFFFFFFF,FFFF,FFFFFFFFFFFFFFFFFFFFFFFF:FFFFFFFF:  
F:FFFFFF:FFFFFFFFFFFFFFFFFFFFFFFFFFFFFFFFFFFFFFFF:FFFFFF

@A00155:342:HHGFNDSXY:1:2243:30617:26396 1:N:0:GAACCTAG+TCCGCATA  
TATGCCTTAAATTACCATCGAAGTTGAATTCGGCTCCTGGTGCCTCGTGATTTCGGAAGAACCTCTTA  
ACGAAACTATCCATTACTCTGAGTTTGCTTTTAGCTTGGGTTTCGTGAGAATTGAAACAAAGCTT

+

FFFFFFFFFFFFFFFFFFFFFFFFFFFFFFFFFFFFFFFFFFFFFFFFFFFFFFFF  
FFFFFFFFFFFFFFFFFFFFFFFFFFFFFFFFFFFFFFFFFFFFFFFF

@A00155:342:HHGFNDSXY:1:1253:27642:34147 1:N:0:GAACCTAG+TCCGCATA  
TATGCCTTAAATTACCATCGAAGTTGAATTCGGCTCCTGGTGCCTCGTGATTTCGGAAGAACCTCTTA  
ACGAAACTATCCATTACTCTGAGTTTGCTTTTAGCTTGGGTTTCGTGAGAATTGAAACAAAGCTTAGG

+

FFFFFFFFFFFFFFFF:FF:FF:FFFFFF:FFFFFFFFFFFFFF,FFFFFFFF  
FFFFFFFFFFFFFFFFFFFFFFFF:FFFFFFFFFFFFFFFFFFFFFF:FFF:F

@A00155:342:HHGFNDSXY:1:2114:11397:11146 1:N:0:GAACCTAG+TCCGCATA  
TATGCCTTAAATTACCATCGAAGTTGAATTCGGCTCCTGGTGCCTCGTGATTTCGGAAGAACCTCTTA  
ACGAAACTATCCATTACTCTGAGTTTGCTTTTAGCTTGGGTTTCGTGAGAATTGAAACAAAGCTTAGG

+

FFFFFFFF:FFFFFFFFFFFFFFFFFFFFFFFFFFFFFFFFFFFFFFFF  
FFFFFFFFFFFFFFFFFFFFFFFF,FFFFFFFF:FFFFFF:FFFFFFFF

[illegible]

@A00155:342:HHGFNDSXY:1:2502:27923:13933 1:N:0:GAACCTAG+TCCGCATA  
TATGCCTTAAATTACCATCGAAGTTGAATTCGGCTCCTGGTGCCTCGTGATTTCGGAAGAACCTCTTA  
ACGAAACTATCCATTACTCTGAGTTTGCTTTTAGCTTGGGTTTCGTGAGAATTGAAACAAAGCTTAGGG  
+  
FFFFFFFFFFFFFFFFFFFFFFFFFFFFFFFFFFFFFFFFFFFFFFFFFFFFFFFFFFFFFFFFFFFFFFFF  
FFFFFFFFFFFFFF:FFFFFFFFFFFFFFFF:FFFFFFFFFFFFFFFF:FFFFF:FFFFFFFF,FFFF  
@A00155:342:HHGFNDSXY:1:2330:13602:28119 1:N:0:GAACCTAG+TCCGCATA  
TATGCCTTAAATTACCATCGAAGTTGAATTCGGCTCCTGGTGCCTCGTGATTTCGGAAGAACCTCTTA  
ACGAAACTATCCATTACTCTGAGTTTGCTTTTAGCTTGGGTTTCGTGAGAATTGAAACAAAGCTTAGGG  
+  
FFFFFFFFFFFFFFFFFFFFFFFF:FFFFFFFFFFFFFFFFFFFFFFFFFFFFFFFFFFFFFFFFFFFFFFFF  
FFFFFFFFFFFFFFFFFFFFFFFF:FFFFFFFFFFFFFFFF:FFFFF:FFFFFFFFFFFFFFFF:F::FFF  
@A00155:342:HHGFNDSXY:1:1121:17888:22545 1:N:0:GAACCTAG+TCCGCATA  
ATGCCTTAAATTACCATCGAAGTTGAATTCGGCTCCTGGTGCCTCGTGATTTCGGAAGAACCTCTTAA  
CGAAACTATCCATTACTCTGAGTTTGCTTTTAGCTTGGGTTTCGTGAGAATTGAAACAAAGCTTAGG  
+  
FFFFF:FFFFFFFFFFFFFFFFFFFFFFFFFFFFFFFFFFFFFFFFFFFFFFFFFFFFFFFFFFFFFFFF  
FFFFFFFFFFFFFFFFFFFFFFFFFFFFFFFFFFFFFFFFFFFFFFFFFFFFFFFFFFFFFFFFFFFFFFFF  
@A00155:342:HHGFNDSXY:1:2408:3278:5979 1:N:0:GAACCTAG+TCCGCATA  
ATGCCTTAAATTACCATCGAAGTTGAATTCGGCTCCTGGTGCCTCGTGATTTCGGAAGAACCTCTTAA  
CGAAACTATCCATTACTCTGAGTTTGCTTTTAGCTTGGGTTTCGTGAGAATTGAAACAAAGCTTAGGGT  
+  
:FFFFF,FFFFFFFFFFFFFFFFFFFFFFFFFFFFFFFFFFFFFFFFFFFFFFFFFFFFFFFFFFFFF  
FFFFFFFFFFFFFFFFFFFFFFFFFFFFFFFFFFFFFFFF:FFFFF:FFFFFFFF,FFFFFFFF:FFFF:,FF,FF  
@A00155:342:HHGFNDSXY:1:1613:25599:10473 2:N:0:GAACCTAG+TCCGCATA  
GCCTTAAATTACCATCGAAGTTGAATTCGGCTCCTGGTGCCTCGTGATTTCGGAAGAACCTCTTAACG  
AAACTATCCATTACTCTGAGTTTGCTTTTAGCTTGGGTTTCGTGAGAATTGAAACAAAGC  
+  
FFF,:FFFFFFFF,FFFFFFFFFFFFFFFFFFFFFFFFFFFFFFFF:FFFFF:FFF:F:FFFF:FFF:FF:F:  
,FFFFFFFF,FFF:FF:FFFF::FFF:F,FFFFFFFFFFFFFFFFFFFFFFFFFFFFFFFF  
@A00155:342:HHGFNDSXY:1:2315:14615:18662 2:N:0:GAACCTAG+TCCGCATA  
GCCTTAAATTACCATCGAAGTTGAATTCGGCTCCTGGTGCCTCGTGATTTCGGAAGAACCTCTTAACG  
AAACTATCCATTACTCTGAGTTTGCTTTTAGCTTGGGTTTCGTGAGAATTGAAACAAAGCT  
+  
FFFFFFFFF:FFFF,FFFF:FFFFFF:FFFFFFFFFFFFFFFFFFFFFFFFFFFFFFFF:FFFFFFFFF,,FF  
FFFF,FFFFF::FFFFFFFFFFFFFFFF:FF:FFFFFFFFFFFFFFFF:FFFF:F:FF:FFFF  
@A00155:342:HHGFNDSXY:1:2305:7048:19774 2:N:0:GAACCTAG+TCCGCATA  
GCCTTAAATTACCATCGAAGTTGAATTCGGCTCCTGGTGCCTCGTGATTTCGGAAGAACCTCTTAACG  
AAACTATCCATTACTCTGAGTTTGCTTTTAGCTTGGGTTTCGTGAGAATTGAAACAAAGCT  
+  
FFF:,FFFFFFFFF:FFFFFFFFF:FFF:FFFFFFFFFFFFFFFF:FFFFFFFFF,FFFFFFFFFFF,F:::  
FFFFFFFFFFFFFFFFFFFFFFFFFFFFFFFFFFFFFFFFFFFFFFFFFFFFFFFFFFFFFFFF:FF  
@A00155:342:HHGFNDSXY:1:1638:11198:11052 2:N:0:GAACCTAG+TCCGCATA  
GCCTTAAATTACCATCGAAGTTGAATTCGGCTCCTGGTGCCTCGTGATTTCGGAAGAACCTCTTAACG  
AAACTATCCATTACTCTGAGTTTGCTTTTAGCTTGGGTTTCGTGAGAATTGAAACAAAGCT  
+  
FFFFFFFFF,FFFF:FFFFFFFF,FFFFFFFFFFFFFFFFFFFFFFFFFFFFFFFFFFFFFFFFFFFFFFFF  
FFFFFFFFFFFFFFFFFFFFFFFFFFFFFFFFFFFFFFFFFFFFFFFFFFFFFFFFFFFFFFFFFFFFFFFF  
@A00155:342:HHGFNDSXY:1:1557:13711:5165 1:N:0:GAACCTAG+TCCGCATA  
GCCTTAAATTACCATCGAAGTTGAATTCGGCTCCTGGTGCCTCGTGATTTCGGAAGAACCTCTTAACG  
AAACTATCCATTACTCTGAGTTTGCTTTTAGCTTGGGTTTCGTGAGAATTGAAACAAAGCTTAGGGTTT  
+  
,FF,FFFFFFFFF,FFFF:FF:FFFFFFFF,:F,,FFFFF,F:FFFFFFFFFFFF:FF:F:FFFFFFF  
FFF::FFFFFFFF:FFFFFFFFF,F,FFFF,FFF,FF,F,FFF:FF,,FFFFF:FFFFF:FF,FFFFF



$+$  $+$ 

+

+

+

+

+

 $+$  $\perp$ 

11.11.2019, 11:11

@A00155:342:HHGFNDSXY:1:1201:31919:35697 1:N:0:GAACCTAG+TCCGCATA  
TAAATTACCATCGAAGTTGAATTCGGCTCCTGGTGCCTCGTGATTGCGGAAGAACCTCTTAACGAAAC  
TATCCATTACTCTGAGTTTGCTTTTAGCTTGGGTTCGTGAGAATTGAAACAAAGCTTAGGGTTTTAG  
+  
FFFFFFFFFFFFFFFFFFFFFFFFFFFFF:FFFFFFFFFFFFFFFFFFFFFFFFFFFFF:FFFFFFFFFFF:FF:  
FFFFFFFFF,FFFFFFFFFFFFFF,:FFFFFFFFF::FFFFFFFFFFFFFFFFFFFFFFFFFFFFFFFFF  
@A00155:342:HHGFNDSXY:1:2678:23104:10942 1:N:0:GAACCTAG+TCCGCATA  
TAAATTACCATCGAAGTTGAATTCGGCTCCTGGTGCCTCGTGATTGCGGAAGAACCTCTTAACGAAAC  
TATCCATTACTCTGAGTTTGCTTTTAGCTTGGGTTCGTGAGAATTGAAACAAAGCTTAGGGTTTTAG  
+  
FFFFFFFFFFFFFFFFFFFFFFFFFFFFFFFFFFFFFFFFFFFFFFFFFFFFFFFFFFFFFFFFFFFFFFFFF  
FFFFFFFFFFFFFFFFFFFFFFFFFFFFFFFFFFFFFFFFFFFFFFFFFFFFFFFFFFFFFFFFFFFFFFFFF:FFFFFFFFFFFF  
@A00155:342:HHGFNDSXY:1:1124:31467:28839 1:N:0:GAACCTAG+TCCGCATA  
TAAATTACCATCGAAGTTGAATTCGGCTCCTGGTGCCTCGTGATTGCGGAAGAACCTCTTAACGAAAC  
TATCCATTACTCTGAGTTTGCTTTTAGCTTGGGTTCGTGAGAATTGAAACAAAGCTTAGGGTTTTAG  
+  
FFFFFFFFFFFFFFFFFFFFFFFFFFFFFFFFFFFFFFFFFFFFFFFFFFFFFFFFFFFFFFFFFFFFFFFFF:FFFFFFFFFFFFFFFFFFFF  
FFFFFFFFFFFFFFFFFFFFF:FFFFFFFFFFFFFFFFFFFFFFFFFFFFFFFFF:FFFFFFFFFFFFFFFFF,FFFFFFFFFF  
@A00155:342:HHGFNDSXY:1:2555:1479:36965 1:N:0:GAACCTAG+TCCGCATA  
TAAATTACCATCGAAGTTGAATTCGGCTCCTGGTGCCTCGTGATTGCGGAAGAACCTCTTAACGAAAC  
TATCCATTACTCTGAGTTTGCTTTTAGCTTGGGTTCGTGAGAATTGAAACAAAGCTTAGGGTTTTAGTT  
+  
FFFFFFFFFFFFFFFFFFFFFFFFF:FFFFF::FF,:FFFFFF,FF,FF:FFF,FFFFFFFF:FF:FFFF:FFFFF  
FFFFFFFFFFFFF:FFFFFFFFF,FFFF:,FFFFFF:F,FFF:F,FFF:,::FF:FF:F,FFFFFFFFFFFF  
@A00155:342:HHGFNDSXY:1:2456:32786:7607 1:N:0:GAACCTAG+TCCGCATA  
TAAATTACCATCGAAGTTGAATTCGGCTCCTGGTGCCTCGTGATTGCGGAAGAACCTCTTAACGAAAC  
TATCCATTACTCTGAGTTTGCTTTTAGCTTGGGTTCGTGAGAATTGAAACAAAGCTTAGGGTTTTAGTT  
+  
FFFFFFFFFFFFFFFFFFFFFFFFFFFFFFFFFFFFFFFFFFFFFFFFFFFFFFFFFFFFFFFFFFFFFFFFF  
FFFFFFFFFFFFFFFFFFFFF:FFFFFFFFFFFFFFFFFFFFFFFFFFFFFFFFF:FFFFFFFFF,FFFFFFFFFFFFF  
@A00155:342:HHGFNDSXY:1:2114:6985:18286 1:N:0:GAACCTAG+TCCGCATA  
AAATTACCATCGAAGTTGAATTCGGCTCCTGGTGCCTCGTGATTGCGGAAGAACCTCTTAACGAAACT  
ATCCATTACTCTGAGTTTGCTTTTAGCTTGGGTTCGTGAGAATTGAAACAAAGCTTAGGGTTTTAG  
+  
FFFF:FFFFFFFFFFFFFFFFFFFFFFFFFFFFFFFFFFFFFFFFFFFFFFFFFFFFF:FF:,FFFFFFFFFFFFFFFFFFFF  
FFF:FFFFFFFFFFFFFFFFFFFFFFFFF,FFFFFFFFFFF:FFFFFFFFFFFFFFFFFFFF,FF:F:FF,FFFF  
@A00155:342:HHGFNDSXY:1:1470:28085:24893 1:N:0:GAACCTAG+TCCGCATA  
AATTACCATCGAAGTTGAATTCGGCTCCTGGTGCCTCGTGATTGCGGAAGAACCTCTTAACGAAACTA  
TCCATTACTCTGAGTTTGCTTTTAGCTTGGGTTCGTGAGAATTGAAACAAAGCTTAGGGTTTTAG  
+  
FFFFFFFFFFFFFFFFFFFFF:FFFFF,FFF::FFFFFFFFFFFFFFFFFFFFFFFFFFFFFFFFF:FFFFFFFFFF:FFFFF  
FFFFFFFFF:F:FFFFFFFFF:FFFFFFFFFFFFFFFFFFFFF::FFFFFFFF,F,F,FF,FFFFFFFF  
@A00155:342:HHGFNDSXY:1:2205:32389:34131 1:N:0:GAACCTAG+TCCGCATA  
AATTACCATCGAAGTTGAATTCGGCTCCTGGTGCCTCGTGATTGCGGAAGAACCTCTTAACGAAACTA  
TCCATTACTCTGAGTTTGCTTTTAGCTTGGGTTCGTGAGAATTGAAACAAAGCTTAGGGTTTTAGTTAG  
+  
FFFFFFFFFFFFFFFFFFFFFFFFFFFFFFFFFFFFFFFFFFFFFFFFFFFFF:FFF:FFFF:FFF:FFFFFF:FFFF:FF:  
:FF::F:FFF,FFFF:FFF:F,FFFF,FFFFFFFFF,FFF::FFF::FF,FFFF:FFFF:,FFFFF,F  
@A00155:342:HHGFNDSXY:1:1521:31602:4711 1:N:0:GAACCTAG+TCCGCATA  
ATTACCATCGAAGTTGAATTCGGCTCCTGGTGCCTCGTGATTGCGGAAGAACCTCTTAACGAAACTAT  
CCATTACTCTGAGTTTGCTTTTAGCTTGGGTTCGTGAGAATTGAAACAAAGCTTAGGGTTTTAGTTAGC  
+

@A00155:342:HHGFNDSXY:1:1462:10131:16344 1:N:0:GAACCTAG+TCCGCATA  
ATTACCATCGAAGTTGAATTCGGCTCCTGGTGCCTCGTGATTTCGGAAGAACCTCTTAACGAAACTAT  
CCATTACTCTGAGTTTGCTTTTAGCTTGGGTTCTGTGAGAATTGAAACAAAGCTTAGGGTTTAGTTAGC  
+  
FFFFFFFFFFFFFFFFFFFFFFFFFFFFFFFFFFFFFFFFFFFFFFFFFFFFFFFFFFFFFFFFFFFFFFFF  
FFFFFFFFFFFFFFFFFFFFFFFFFFFFFFFFFFFFFFFFFFFFFFFFFFFFFFFFFFFFFFFFFFFFFFFF  
@A00155:342:HHGFNDSXY:1:2502:9417:5619 1:N:0:GAACCTAG+TCCGCATA  
ATTACCATCGAAGTTGAATTCGGCTCCTGGTGCCTCGTGATTTCGGAAGAACCTCTTAACGAAACTAT  
CCATTACTCTGAGTTTGCTTTTAGCTTGGGTTCTGTGAGAATTGAAACAAAGCTTAGGGTTTAGTTAGC  
+  
FFFFFFFFFFFFFFFFFFFFFFFFFFFFFFFFFFFFFFFFFFFFFFFFFFFFFFFFFFFFFFFFFFFFFFFF  
FFFFFFFFFFFFFFFFFFFFFFFFFFFFFFFFFFFFFFFFFFFFFFFFFFFFFFFFFFFFFFFFFFFFFFFF  
@A00155:342:HHGFNDSXY:1:2333:15383:29857 1:N:0:GAACCTAG+TCCGCATA  
ATTACCATCGAAGTTGAATTCGGCTCCTGGTGCCTCGTGATTTCGGAAGAACCTCTTAACGAAACTAT  
CCATTACTCTGAGTTTGCTTTTAGCTTGGGTTCTGTGAGAATTGAAACAAAGCTTAGGGTTTAGTTAGC  
+  
FFFFFFFFFFFFFFFFFFFFFFFFFFFFFFFFFFFFFFFFFFFFFFFFFFFFFFFFFFFFFFFFFFFFFFFF  
FFFFFFFFFFFFFFFFFFFFFFFFFFFFFFFFFFFFFFFFFFFFFFFFFFFFFFFFFFFFFFFFFFFFFFFF  
@A00155:342:HHGFNDSXY:1:1107:24397:4946 1:N:0:GAACCTAG+TCCGCATA  
TTACCATCGAAGTTGAATTCGGCTCCTGGTGCCTCGTGATTTCGGAAGAACCTCTTAACGAAACTATC  
CATTACTCTGAGTTTGCTTTTAGCTTGGGTTCTGTGAGAATTGAAACAAAGCTTAGGGTTT  
+  
FFFFFFFFFFFFFFFFFFFFFFFFFFFFFFFFFFFFFFFFFFFFFFFFFFFFFFFFFFFFFFFFFFFFFFFF  
FFFFFFFFFFFFFFFFFFFFFFFFFFFFFFFFFFFFFFFFFFFFFFFFFFFFFFFFFFFFFFFFFFFFFFFF  
@A00155:342:HHGFNDSXY:1:2537:26313:1344 1:N:0:GAACCTAG+TCCGCATA  
TTACCATCGAAGTTGAATTCGGCTCCTGGTGCCTCGTGATTTCGGAAGAACCTCTTAACGAAACTATC  
CATTACTCTGAGTTTGCTTTTAGCTTGGGTTCTGTGAGAATTGAAACAAAGCTTAGGGTTT  
+  
FFFFFFFFFFFFFFFFFFFFFFFFFFFFFFFFFFFFFFFFFFFFFFFFFFFFFFFFFFFFFFFFFFFFFFFF  
,FFFFFFFFFFFFFFFF,FFFFFFFFFFFFFFFFFFFFFFFFFFFFFFFFFFFFFFFF,FF:FFFF  
@A00155:342:HHGFNDSXY:1:2307:9290:34397 1:N:0:GAACCTAG+TCCGCATA  
TTACCATCGAAGTTGAATTCGGCTCCTGGTGCCTCGTGATTTCGGAAGAACCTCTTAACGAAACTATC  
CATTACTCTGAGTTTGCTTTTAGCTTGGGTTCTGTGAGAATTGAAACAAAGCTTAGGGTTTAG  
+  
FFFFFFFFFFFFFFFFFFFFFFFFFFFFFFFFFFFFFFFFFFFFFFFFFFFFFFFFFFFFFFFFFFFFFFFF  
FFFFFFFFFFFFFFFFFFFFFFFFFFFFFFFFFFFFFFFFFFFFFFFFFFFFFFFFFFFFFFFFFFFFFFFF  
@A00155:342:HHGFNDSXY:1:2444:28782:3897 1:N:0:GAACCTAG+TCCGCATA  
TTACCATCGAAGTTGAATTCGGCTCCTGGTGCCTCGTGATTTCGGAAGAACCTCTTAACGAAACTATC  
CATTACTCTGAGTTTGCTTTTAGCTTGGGTTCTGTGAGAATTGAAACAAAGCTTAGGGTTTAG  
+  
FFFFFFFFFFFFFFFFFFFFFFFFFFFFFFFFFFFFFFFFFFFFFFFFFFFFFFFFFFFFFFFFFFFFFFFF  
FFFFFFFFFFFFFFFFFFFFFFFFFFFFFFFFFFFFFFFFFFFFFFFFFFFFFFFFFFFFFFFFFFFFFFFF  
@A00155:342:HHGFNDSXY:1:2518:4218:28119 1:N:0:GAACCTAG+TCCGCATA  
ACCATCGAAGTTGAATTCGGCTCCTGGTGCCTCGTGATTTCGGAAGAACCT  
+  
FFFFFFFFFFFFFFFFFFFFFFFFFFFFFFFFFFFFFFFFFFFFFFFFFFFFFFFFFFFFFFFFFFFFFFFF  
@A00155:342:HHGFNDSXY:1:2248:29658:22670 1:N:0:GAACCTAG+TCCGCATA  
ACCATCGAAGTTGAATTCGGCTCCTGGTGCCTCGTGATTTCGGAAGAACCTCTTAACGAAACTATCCA  
TTACTCTGAGTTTGCTTTTAGCTTGGGTTCTGTGAGAATTGAAACAAAGCTTAGGGTTTAG  
+  
FFFFF:FFFFFFFFFFFFFFFFFFFFFFFFFFFFFFFFFFFFFFFF:FFFFF::FFFF:FFFFFFFF:FFFFFFFF:FFFFFFFF  
FFFFFFFF:FFFF:,FFFFFFFFFFFFFFFFFFFFFFFFFFFFFFFF:FFFFF,FFF::FFFFFFFF,FFFF  
@A00155:342:HHGFNDSXY:1:1326:11469:33630 1:N:0:GAACCTAG+TCCGCATA  
ACCATCGAAGTTGAATTCGGCTCCTGGTGCCTCGTGATTTCGGAAGAACCTCTTAACGAAACTATCCA

TTACTCTGAGTTTGCTTTTAGCTTGGGTTCTGAGAATTGAAACAAAGCTTAGGGTTTAGTTAGC  
+  
FFFFFFFFFFFFFFFFFFFFFFFFFFFFFFFFFFFFFFFFFFFFFFFFFFFFFFFFFFFFFFFFFFFFFFFF  
:FFFFFFFFFFFFFFFFFFFFFFFFFFFFFFFFFFFFFFFFFFFFFFFFFFFFFFFFFFFFFFFFFFFFFFFF  
@A00155:342:HHGFNDSXY:1:1530:18313:8124 1:N:0:GAACCTAG+TCCGCATA  
ACCATCGAAGTTGAATTCGGCTCCTGGTGCCTCGTGATTTCGGGAAGAACCTCTTAACGAAACTATCCA  
TTACTCTGAGTTTGCTTTTAGCTTGGGTTCTGAGAATTGAAACAAAGCTTAGGGTTTAGTTAGC  
+  
FFFFFFFFFFFFFFFFFFFFFFFFFFFFFFFFFFFFFFFFFFFFFFFFFFFFFFFFFFFFFFFFFFFFFFFF  
FFFFFFFFFFFFFFFFFFFFFFFFFFFFFFFFFFFFFFFFFFFFFFFFFFFFFFFFFFFFFFFFFFFFFFFF  
@A00155:342:HHGFNDSXY:1:2359:21251:2159 1:N:0:GAACCTAG+TCCGCATA  
ACCATCGAAGTTGAATTCGGCTCCTGGTGCCTCGTGATTTCGGGAAGAACCTCTTAACGAAACTATCCA  
TTACTCTGAGTTTGCTTTTAGCTTGGGTTCTGAGAATTGAAACAAAGCTTAGGGTTTAGTTAGC  
+  
FFFFFFFFFFFFFFFFFFFFFFFFFFFFFFFFFFFFFFFFFFFFFFFFFFFFFFFFFFFFFFFFFFFFFFFF  
FF:FFFFFFFFFFFFFFFFFFFFFFFFFFFFFFFFFFFFFFFFFFFFFFFFFFFFFFFFFFFFFFFFFFFFFFFF  
@A00155:342:HHGFNDSXY:1:2472:30770:2300 1:N:0:GAACCTAG+TCCGCATA  
CCATCGAAGTTGAATTCGGCTCCTGGTGCCTCGTGATTTCGGGAAGAACCTCTTAACGAAACTATCCAT  
TACTCTGAGTTTGCTTTTAGCTTGGGTTCTGAGAATTGAAACAAAGCTTAGGGTTTAGT  
+  
FFFFFFFFFFFFFFFFFFFFFFFFFFFFFFFFFFFFFFFFFFFFFFFFFFFFFFFFFFFFFFFFFFFFFFFF  
FFFFFFFFFFFFFFFFFFFFFFFFFFFFFFFFFFFFFFFFFFFFFFFFFFFFFFFFFFFFFFFFFFFFFFFF  
@A00155:342:HHGFNDSXY:1:1453:22516:2409 1:N:0:GAACCTAG+TCCGCATA  
CCATCGAAGTTGAATTCGGCTCCTGGTGCCTCGTGATTTCGGGAAGAACCTCTTAACGAAACTATCCAT  
TACTCTGAGTTTGCTTTTAGCTTGGGTTCTGAGAATTGAAACAAAGCTTAGGGTTTAGT  
+  
FFFFFFFFFFFFFFFFFFFFFFFFFFFFFFFFFFFFFFFFFFFFFFFFFFFFFFFFFFFFFFFFFFFFFFFF  
FFFFFFFFFFFFFFFFFFFFFFFFFFFFFFFFFFFFFFFFFFFFFFFFFFFFFFFFFFFFFFFFFFFFFFFF  
@A00155:342:HHGFNDSXY:1:1232:4209:10410 1:N:0:GAACCTAG+TCCGCATA  
CCATCGAAGTTGAATTCGGCTCCTGGTGCCTCGTGATTTCGGGAAGAACCTCTTAACGAAACTATCCAT  
TACTCTGAGTTTGCTTTTAGCTTGGGTTCTGAGAATTGAAACAAAGCTTAGGGTTTAGTTAGC  
+  
FFFFFFFFFFFFFFFFFFFFFFFFFFFFFFFFFFFFFFFFFFFFFFFFFFFFFFFFFFFFFFFFFFFFFFFF  
FFFFFFFFFFFFFFFFFFFFFFFFFFFFFFFFFFFFFFFFFFFFFFFFFFFFFFFFFFFFFFFFFFFFFFFF  
@A00155:342:HHGFNDSXY:1:1638:11198:11052 1:N:0:GAACCTAG+TCCGCATA  
CGAAGTTGAATTCGGCTCCTGGTGCCTCGTGATTTCGGGAAGAACCTCTTAACGAAACTATCCATTACT  
CTGAGTTTGCTTTTAGCTTGGGTTCTGAGAATTGAAACAAAGCTTAGGGTTTAGTTAGC  
+  
FFFFFFFFFFFFFFFFFFFFFFFFFFFFFFFFFFFFFFFFFFFFFFFFFFFFFFFFFFFFFFFFFFFFFFFF  
:FFFF:FFFF:FFFFFFFFFF:FFFFFFFFFF,FFFFFFFFFFFFFF:FFFFFFFFFFFFFFF  
@A00155:342:HHGFNDSXY:1:2315:14615:18662 1:N:0:GAACCTAG+TCCGCATA  
CGAAGTTGAATTCGGCTCCTGGTGCCTCGTGATTTCGGGAAGAACCTCTTAACGAAACTATCCATTACT  
CTGAGTTTGCTTTTAGCTTGGGTTCTGAGAATTGAAACAAAGCTTAGGGTTTAGTTAGC  
+  
FFFFFFFFFFFFFFFFFFFFFFFFFFFFFFFFFFFFFFFFFFFFFFFFFFFFFFFFFFFFFFFFFFFFFFFF  
FFF:FFFFFF:FFFFFFFFFFFFFFFFFFFFFFFFFFFFFFFFFFFFFFFFFFFFFFFF:F:FFFFFFFFFFFF  
@A00155:342:HHGFNDSXY:1:1613:25599:10473 1:N:0:GAACCTAG+TCCGCATA  
CGAAGTTGAATTCGGCTCCTGGTGCCTCGTGATTTCGGGAAGAACCTCTTAACGAAACTATCCATTACT  
CTGAGTTTGCTTTTAGCTTGGGTTCTGAGAATTGAAACAAAGCTGAGGGTTTAGTTAGC  
+  
FFFFFFFFFFFFFFF:F,,:FFFFFFFFFFFFFF:FFF,:FFF:FFFF:FFFF:FF:FFFFFFFFFFFF,:FFF  
FFFF:,F:FF,F:FFFFFF:FFFF,:FF:FFFF,FFFFFF,FF,,FFF:FFFFFFFF,F  
@A00155:342:HHGFNDSXY:1:2574:9182:24283 1:N:0:GAACCTAG+TCCGCATA  
GAAGTTGAATTCGGCTCCTGGTGCCTCGTGATTTCGGGAAGAACCTCTTAACGAAACTATCCATTACTC

[illegible]
