# Supplementary material for: First Detection and Molecular Characterization of Apple Stem Grooving Virus, Apple Chlorotic Leaf Spot Virus, and Apple Hammerhead Viroid in Loquat in Spain
Source: MDPI journal article supplement (doi:10.3390/plants10112293), 2021-10-25
Supplement: s1 [file s1]

@A00155:342:HHGFNDSXY:1:1101:16297:9236 1:N:0:GAACCTAG+TCCGCATA  
TGTCCTTAAGGACTCACCTCTGGCCTATGGTCATCTCAATGCCGAGAGGGATGTGGAGGGCGAGAG  
AGAGCGACTTCTCTCGGGCCCACAGCCTTACAGCTGTGGAGCACGGTATCCTCTGCCGAAACAGAGGT  
+  
FFFFFFFFFFFFFFFFFFFFFFFFFFFFFFFFFFFFFFFFFFFFFFFFFFFFFFFFFFFFFFFFFFFFF,F,FFFFFFFFFFFF  
FFFFFFFFFFFFFFFFFFFFFFFFFFFFFFFFFFFFFFFFFFFFFFFFFFFFFFFFFFFFFFFFFFFFFFFFF  
@A00155:342:HHGFNDSXY:1:1101:25382:14262 1:N:0:GAACCTAG+TCCGCATA  
TCACCTCTGGCCTATGGTCATCTCAATGCCGAGAGGGATGTGGAGGGCTAGAGAGAGCGACTTCTCTC  
GGGGCCACAGCCTTACAGCTGTGGAGCACGGTATCCTCTGCCGAAACAGAGGTTGGACAAGACCGGAG  
+  
FFFFFFFFFF:FFF,,FFFFFFFFFFFF,,FFFF:FFFFFFFFFFFF:FF,F,FFFFFF,FFFF:FFFF  
:FFFFFFFFFFFFFFFFFFFF:FFFF:FFFF,FFFFFFFF,:F:FFFFFFFFFFFF:FFFF,FF,:,FF  
@A00155:342:HHGFNDSXY:1:1101:29740:22216 1:N:0:GAACCTAG+TCCGCATA  
GAGAGGGATGTGGAGGGCGAGAGAGAGCGACTTCTCTCGGGCCCACAGCCTTACAGCTGTGGAGCACG  
GTATCCTCTGCCGAAACAGAGGTTGGACAAGACCGGAGGGGTCTCTGTTCCAAAGGAGATGTACTC  
+  
FFFFFFFFFFFFFFFFFFFFFFFFFFFFFFFFFFFFFFFFFFFFFFFFFFFFFFFFFFFFFFFFFFFFFFFFF  
FFFFFFFFFFFFFFFFFFFFFFFFFFFFFFFFFFFFFFFFFFFFFFFFFFFFFFFFFFFFFFFFFFFFF:FFFFFFFFFFFFFFFFFFFFF  
@A00155:342:HHGFNDSXY:1:1101:27055:25895 1:N:0:GAACCTAG+TCCGCATA  
TGTGGAGGGCGAGAGAGAGCGACTTCTCTCGGGCCCACAGCCTTACAGCTGTGGAGCACGGTATCCTC  
TGCCGAAACAGAGGTTGGACAAGACCGGAGGGGTCTCCTAGTTCAAAGGAGATGTACTCCGGG  
+  
FFFFFFFFFFFFFFFFFFFFFFFFFFFFFFFFFFFFFFFFFFFFFFFFFFFFFFFFFFFFFFFFFFFFFFFFF  
FFFFFFFFFFFFFFFFFFFFFFFFFFFFFFFFFFFFFFFFFFFFFFFFFFFFFFFFFFFFFFFFFFFFF:FFFFFFFFFFFFFFFFFFFFF  
@A00155:342:HHGFNDSXY:1:1101:27281:25974 1:N:0:GAACCTAG+TCCGCATA  
TGTGGAGGGCGAGAGAGAGCGACTTCTCTCGGGCCCACAGCCTTACAGCTGTGGAGCACGGTATCCTC  
TGCCGAAACAGAGGTTGGACAAGACCGGAGGGGTCTCCTAGTTCAAAGGAGATGTACTCCGGG  
+  
FFFFFFFFFFFFFFFFFFFFFFFFFFFFFFFFFFFFFFFFFFFFFFFFFFFFFFFFFFFFFFFFFFFFFFFFF  
FF:FFFFFFFFFFFFFFFFFFFFFFFFFFFFFFFFFFFFFFFFFFFFFFFFFFFFFFFFFFFFFFFFFFFFF  
@A00155:342:HHGFNDSXY:1:1102:6081:1376 1:N:0:GAACCTAG+TCCGCATA  
GGATGTGGAGGGCGAGAGAGAGCGACTTCTCTCGGGCCCACAGCCTTACAGCTGTGGAGCACGGTATC  
CTCTGCCGAAACAGAGGTTGGACAAGACCGGAGGGGTCTCCTAGTTCAAAGGAGATGTACTCCGGGC  
+  
FF:FFFFFFFFFFFFFFFFFFFF:F,FFFFFFFFFFFF,FFFFFFFF,FFFFFF,,,:FFFFFFFFFFFFFFFFFFFF  
FFFFFFFFFFFFFFFFFFFFFFFFFFFFFFFFFFFFFFFFFFFFFFFFFFFFFFFFFFFFFFFFFFFFF:FFFFF:FFFFFFFFFFFFFFFFFFFFF  
@A00155:342:HHGFNDSXY:1:1102:15284:16250 1:N:0:GAACCTAG+TCCGCATA  
GATCAGCTATGTCCACTTAAGGACTCACCTCTGGCCTATGGTCATCTCAATGCCGAGAGGGATGTGGA  
GGGCGAGAGAGAGCGACTTCTCTCGGGCCCACAGCCTTACAGCTGTGGAGCACGGTATCCTCTGCCGA  
+  
FFFFFFFFFFFF:FFFFFFFFFFFFFFFFFFFFFFFFFFFFFFFFFFFFFFFFFFFFFFFFFFFFFFFFFFFFF,FFFFF  
FFFFFFFFFFFFFFFFFFFFFFFFFFFFFFFFFFFFFFFFFFFFFFFFFFFFFFFFFFFFFFFFFFFFF:FFFFFFFFFFFFFFFFFFFFF  
@A00155:342:HHGFNDSXY:1:1102:10303:21840 1:N:0:GAACCTAG+TCCGCATA  
TCTCAATGCCGAGAGGGATGTAGAGGGCGAGAGAGAGCGACTTCTCTCGGGCCCACAGCCTTACAGCT  
GTGGAGCACGGTATCCTCTGCCGAAACAGAGGTTGGACAAGACCGGAGGGGTCTCCTAGTTCAAAGG  
+  
FFFFFFFFFFFFF:FFFFF:F:FFFFFFFFFFFFFFFFFFFF:FFFFFFFFFFFFFFFFFFFFF:FFFFF  
FFFFFFFFFFFFFFFFFFFFFFFFFFFFFFFFFFFFFFFFFFFFFFFFFFFFFFFFFFFFFFFFFFFFF:FFFFFFFFFFFFFFFFFFFFF  
@A00155:342:HHGFNDSXY:1:1103:31855:6621 1:N:0:GAACCTAG+TCCGCATA  
CTTCTCTCGGGCCCACAGCCTTACAAGTGTGGAGCACGGTATCCTCTGCCGAAACAGAGGTTGGACAA  
GACCGGAGGGGTCTCCTAGTTCAAAGGAGATGTACTCCGGGCTTGTTACAGACCTACCGTGTAAAGTC  
+  
FFFF:FFFFFFFFFFFFFFFFFFFFFFFFFFFFFFFFFFFFFFFFFFFFFFFFFFFFFFFFFFFFFFFFFFFFF:FFFFF  
FFFFFFFFFFFFFFFFFFFF:FFFFFFFFFFFF:FFFFFFFFFFFFFFFFFFFFFFFFFFFFFFFFFFFFF,FFFFF

[illegible]

@A00155:342:HHGFNDSXY:1:1106:31919:20384 1:N:0:GAACCTAG+TCCGCATA  
ATCTCAATGCCGAGAGGGATGTGGAGGGCGAGAGAGAGCGACTTCTCTCGGGCCACAGCCTTACAGC  
TGTGGAGCACGGTATCCTCTGCCGAAACAGAGTTGGACAAGACCGGAGGGGTCTCCTA

@A00155:342:HHGFNDSXY:1:1108:23068:12007 1:N:0:GAACCTAG+TCCGCATA  
AATGCCGAGAGGGATGTGGAGGGCGAGAGAGAGCGACTTCTCTCGGGCCACAGCCTTACAGCTGTGG  
AGCACGGTATCCTCTGCCGAAACAGAGGTTGGACAAGACCGGAGGGGTCTCCTAGTTCCAAAGGAGAT  
+  
FFFFFFFFFFFFFFFF:F,FFFFFFFFFFFFFFFFFFFFFFFFFFFFFFFFFFFFFFFFFFFFFFFFFFFFFFFF  
FFFFFFFFFFFFFFFFFFFFFFFFFFFFFFFFFFFFFFFFFFFFFFFFFFFFFFFFFFFFFFFFFFFFFFFFFFFF  
@A00155:342:HHGFNDSXY:1:1108:8721:14591 1:N:0:GAACCTAG+TCCGCATA  
CGACTTCTCTCGGGCCACAGCCTTACAGCTGTGGAGCACGGTATCCTCTGCCGAAACAGAGGTTGGA  
CAAGACCGGAGGGGTCTCCTAGTTCCAAAGGAGATGTACTCCGGGCTTGTTACGACCTACCGTGTAA  
+  
FFFFFFFFFFFFFFFF:FFFFFFFFFFFFFFFFFFFFFFFFFFFFFFFFFFFFFFFFFFFFFFFFFFFFFFFF  
FFFFFFFFFFFFFFFFFFFFFFFFFFFFFFFFFFFFFFFFFFFFFFFFFFFFFFFFFFFFFFFFFFFFFFFF::  
@A00155:342:HHGFNDSXY:1:1108:8901:14904 1:N:0:GAACCTAG+TCCGCATA  
CGACTTCTCTCGGGCCACAGCCTTACAGCTGTGGAGCACGGTATCCTCTGCCGAAACAGAGGTTGGA  
CAAGACCGGAGGGGTCTCCTAGTTCCAAAGGAGATGTACTCCGGGCTTGTTACGACCTACCGTGTAA  
+  
FFFFFFFFFFFFFFFFFFFF,FFF,FF:FFFF,F,F::,F:F,FFF:FFFFFFFFFFFFFFFFFFFFFFFF  
FFFFFFFFFFFFFFFFFFFFFFFFFFFFFFFFFFFFFFFFFFFFFFFFFFFFFFFFFFFFFFFFFFFFFFFF:F  
@A00155:342:HHGFNDSXY:1:1108:26323:15358 1:N:0:GAACCTAG+TCCGCATA  
GGATGTGGAGGGCGAGAGAGAGCGACTTCTCTCGGGCCACAGCCTTACAGCTGTGGAGCACGGTATC  
CTCTGCCGAAACAGAGGTTGGACAAGACCGGAGGGGTCTCCTAGTTCCAAAGGAGATGTACTCC  
+  
FFFFF:FFFFFFFFFFFFFFFFFFFFFFFFFFFFFFFFFFFFFFFFFFFFFFFFFFFFFFFFFFFFFFFFFFFF  
FFFFFFFFFFFFFFFFFFFFFFFFFFFFFFFFFFFFFFFFFFFFFFFFFFFFFFFFFFFFFFFFFFFFFFFFFFFF  
@A00155:342:HHGFNDSXY:1:1108:16703:16642 1:N:0:GAACCTAG+TCCGCATA  
CTCTGCCGAAACAGAGGTTGGACAAGACCGGAGGGGTCTCCTAGTTCCAAAGGAGATGTACTCCGGGC  
TTGTTACGACCTACCGTGTAAAGTCGTAGTCTAGTAGGCTACCTGACGAGTCCTTTTTAGGACGAAAC  
+  
FFFFFFFFFFFFFFFFFFFFFFFFFFFFFFFFFFFFFFFFFFFFFFFFFFFFFFFFFFFFFFFFFFFFFFFF:FFFFF  
FFFFFFFFFFFFFFFFFFFFFFFFFFFFFFFFFFFFFFFFFFFFFFFFFFFFFFFFFFFFFFFFFFFFFFFF:FF  
@A00155:342:HHGFNDSXY:1:1109:19370:2628 1:N:0:GAACCTAG+TCCGCATA  
CTTCTCTCGGGCCACAGCCTTACAGCTGTGGAGCACGGTATCCTCTGCCGAAACATAGGTTGGACAA  
GACCGGAGGGGTCTCCTAGTTCCAAAGGAGATGTACTCCGGGCTTGTTACGACCTACCGTGTAAAGTC  
+  
FFFFFFFFFFFFFFFFFFFFFFFFFFFFFFFFFFFFFFFFFFFFFFFFFFFFFFFFFFFFFFFFFFFFFFFF  
FFFFFFFFFFFFFFFFFFFFFFFFFFFFFFFFFFFFFFFFFFFFFFFFFFFFFFFFFFFFFFFFFFFFFFFFFFFF  
@A00155:342:HHGFNDSXY:1:1109:16161:24220 1:N:0:GAACCTAG+TCCGCATA  
GAGCGACTTCTCTCGGGCCACAGCCTTACAGCTGTGGAGCACGGTATCCTCTGCCGAAACAGAGGTT  
GGACAAGACCGGAGGGGTCTCCTAGTTCCAAAGGAGATGTACTCCGGGCTTGTTACGACCTACCGTG  
+  
FFFFFFFFFFFFFFFFFFFFFFFFFFFFFFFFFFFFFFFFFFFFFFFFFFFFFFFFFFFFFFFFFFFFFFFFFFFF  
FFFFFFFFFFFFFFFFFFFFFFFFFFFFFFFFFFFFFFFFFFFFFFFFFFFFFFFFFFFFFFFFFFFFFFFFFFFF  
@A00155:342:HHGFNDSXY:1:1109:16595:28729 1:N:0:GAACCTAG+TCCGCATA  
ATCCTCTGCCGAAACAGAGGTTGGACAAGACCGGAGGGGTCTCCTAGTTCCAAAGGAGATGTACTCCG  
GGCTTGTTACGACCTACCGTGTAAAGTCGTAGTCTAGTAGGCTACCTGACGAGTCCTTTTTAGGACGA  
+  
FFFFFFFFFFFFFFFFFFFFFFFFFFFFFFFFFFFFFFFFFFFFFFFFFFFFFFFFFFFFFFFFFFFFFFFFFFFF  
FFFFFFFFFFFFFFFFFFFFFFFFFFFFFFFFFFFFFFFFFFFFFFFFFFFFFFFFFFFFFFFFFFFFFFFFFFFF  
@A00155:342:HHGFNDSXY:1:1110:9751:20290 1:N:0:GAACCTAG+TCCGCATA  
ATCCTCTGCCGAAACAGAGGTTGGACAAGACCGGAGGGGTCTCCTAGTTCCAAAGGAGATGTACTCCG  
GGCTTGTTACGACCTACCGTGTAAAGTCGTAGTCTAGTAGGCTACCTGACGAGTCCTTTTTAGGACGA  
+  
FFFFFFFFFFFFFFFFFFFFFFFFFFFFFFFFFFFFFFFFFFFFFFFFFFFFFFFFFFFFFFFFFFFFFFFFF,  
FFFFFFFFFFFFFFFFFFFFFFFFFFFFFFFFFFFFFFFFFFFFFFFFFFFFFFFFFFFFFFFFFFFFFFFFFFFF  
FFFFFFFFFFFFFFFFFFFF,FFFFFFFFFFFFFFFFFFFFFFFFFFFFFFFFFFFFFFFFFFFFFFFFFFFFF

[illegible]

@A00155:342:HHGFNDSXY:1:1112:16477:25238 1:N:0:GAACCTAG+TCCGCATA  
AAGGACTCACCTCTGGCCTATGGTCATCTCAATGCCGAGAGGGATGTGAAGGGCGAGAGAGAGCGACT  
TCTCTCGGGCCCACAGCCTTACAGCTGTGGAGCACGGTATCCTCTGCCGAAACAGAGGTTGGACAAGA  
+  
FFFFFFFFFFFFFFFFFFFFFFFFFFFFFFFFFFFFFFFFFFFFFFFFFFFFFFFFFFFFFFFFFFFFFFFFF  
FFFFFFFFFFFFFFFFFFFFFFFFFFFFFFFFFFFFFFFFFFFFFFFFFFFFFFFFFFFFFFFFFFFFFFFFF:  
@A00155:342:HHGFNDSXY:1:1113:27877:13917 1:N:0:GAACCTAG+TCCGCATA  
GCGACTTCTCTCGGGCCCACAGCCTTACAGCTGTGGAGCACGGTATCCTCTGCCGAAACAGAGGTTGG  
ACAAGACCGGAGGGGTCTCCTAGTTCCAAAGGAGATGTACTCCGGGCTTGTTACGACCTACCGTGTA  
+  
FFFFFFFFFFFFFFFFFFFFFFFFFFFFFFFFFFFFFFFFFFFFFFFFFFFFFFFFFFFFFFFFFFFFFFFFF:  
FFFFFFFFFFFFFFFFFFFFFFFFFFFFFFFFFFFFFFFFFFFFFFFFFFFFFFFFFFFFFFFFFFFFFFFFF:  
@A00155:342:HHGFNDSXY:1:1113:20609:25567 1:N:0:GAACCTAG+TCCGCATA  
TGTTTTCGGCAGAGGATACCGTGCTCCACAGCTGTAAGGCTGTGGGCCCGAGAGAAGTCGCTCTCTCTC  
GCCCTCTACATCCCTCTCGGCATTGAGATGACCATAGGCCAGAGGTGAGTCCTTAAGTGGACACAGCT  
+  
FFFFFFFFFFFFFFFFFFFFFFFFFFFFFFFFFFFFFFFFFFFFFFFFFFFFFFFFFFFFFFFFFFFFFFFFF  
FFFFFFFFFFFFFFFFFFFFFFFFFFFFFFFFFFFFFFFFFFFFFFFFFFFFFFFFFFFFFFFFFFFFFFFFF,  
@A00155:342:HHGFNDSXY:1:1113:17345:28150 1:N:0:GAACCTAG+TCCGCATA  
ATCTCAATGCCGAGAGGGATGTGGAGGGCGAGAGAGAGCGACTTCTCTCGGGCCCACAGCCTTACAGC  
TGTGGAGCACGGTATCCTCTGCCGAAACAGAGGTTGGACAAGACCGGAGGGGTCTCCTAGTTCCAAAG  
+  
FFFFFFFFFFFFFFFFFFFFFFFFFFFFFFFFFFFFFFFFFFFFFFFFFFFFFFFFFFFFFFFFFFFFFFFFF  
FFFFFFFFFFFFFFFFFFFFFFFFFFFFFFFFFFFFFFFFFFFFFFFFFFFFFFFFFFFFFFFFFFFFFFFFF:  
@A00155:342:HHGFNDSXY:1:1114:15646:16000 1:N:0:GAACCTAG+TCCGCATA  
GGGCGAGAGAGAGCGACTTCTCTCGGGCCCACAGCCTTACAGCTGTGGAGCACGGTATCCTCTGCCGA  
AACAGAGGTTGGACAAGACCGGAGGGGTCTCCTGGTTCCAAAGGAGATGTACTCCGGGCTTGTTACAG  
+  
FFFFFFFFFFFFFFFFFFFFFFFFFFFFFFFFFFFFFFFFFFFFFFFFFFFFFFFFFFFFFFFFFFFFFFFFF  
FFFFFFFFFFFFFFFFFFFFFFFFFFFFFFFFFFFFFFFFFFFFFFFFFFFFFFFFFFFFFFFFFFFFFFFFF:  
@A00155:342:HHGFNDSXY:1:1114:25021:21371 1:N:0:GAACCTAG+TCCGCATA  
ACCTCTGTTTCGGCAGAGGATACCGTGCTCCACAGCTGTAAGGCTGTGGGCCCGAGAGAAGTCGCTCT  
CTCTCGCCCTCTACATCCCTCTCGGCATTGAGATGACCATAGGCCAGAGGTGAGTCCTTAAGTGGACA  
+  
FFFFFFFFFFFFFFFFFFFFFFFFFFFFFFFFFFFFFFFFFFFFFFFFFFFFFFFFFFFFFFFFFFFFFFFFF,  
FFFFFFFFFFFFFFFFFFFFFFFFFFFFFFFFFFFFFFFFFFFFFFFFFFFFFFFFFFFFFFFFFFFFFFFFF:  
@A00155:342:HHGFNDSXY:1:1114:30391:32737 1:N:0:GAACCTAG+TCCGCATA  
AATGCCGAGAGGGATGTAGAGGGCGAGAGAGAGCGACTTCTCTCGGGCCCACAGCCTTACAGCTGTGG  
AGCACGGTATCCTCTGCCGAAACAGAGGTTGGACAAGACCGGAGGGGTCTCCTAGTTCCAAAGGAGAT  
+  
FFFFFFFFFFFFFFFFFFFFF:FFFFFFFFFFFFFFFFFFFFFFFFFFFFFFFFFFFFFFFFFFFFFFFFF:  
FFFFFFFFFFFFFFFFFFFFF:FFFFFFFFFFFFFFFFFFFFFFFFFFFFFFFFFFFFFFFFFFFFFFFFF:  
@A00155:342:HHGFNDSXY:1:1115:17463:34992 1:N:0:GAACCTAG+TCCGCATA  
GTCATCTCAATGCCGAGAGGGATGTGGAGGGCGAGAGAGAGCGACTTCTCTCGGGCCCACAGCCTTAC  
AGCTGTGGAGCACGGTATCCTCTGCCGAAACAGAGGTTGGACAAGACCGGAGGGGTCTCCTAG  
+  
FFFFFFFFFFFFFFFFFFFFFFFFFFFFFFFFFFFFFFFFFFFFFFFFFFFFFFFFFFFFFFFFFFFFFFFFF:  
FFFFFFFFFFFFFFFFFFFFFFFFFFFFFFFFFFFFFFFFFFFFFFFFFFFFFFFFFFFFFFFFFFFFFFFFF:  
@A00155:342:HHGFNDSXY:1:1116:9091:9502 1:N:0:GAACCTAG+TCCGCATA  
GAGGGCGAGAGAGAGCGACTTCTCTCGGGCCCACAGCCTTACAGCTGTGGAGCACGGTATCCTCTGCC  
GAAACAGAGGTTGGACAAGACCGGAGGGGTCTCCTAGTTCCAAAGGAGATGTACTCCGGGCTTGTTCA  
+  
FFFFFFFFFFFFFFFFFFFFFFFFFFFFFFFFFFFFFFFFFFFFFFFFFFFFFFFFFFFFFFFFFFFFFFFFF:  
FFFFFFFFFFFFFFFFFFFFFFFFFFFFFFFFFFFFFFFFFFFFFFFFFFFFFFFFFFFFFFFFFFFFFFFFF:  
@A00155:342:HHGFNDSXY:1:1116:9091:9502 1:N:0:GAACCTAG+TCCGCATA



@A00155:342:HHGFNDSXY:1:1120:1814:3818 1:N:0:GAACCTAG+TCCGCATA  
AGAGAGAGCGACTTCTCTCGGGCCCACAGCCTTACAGCTGTGGAGCACGGTATCCTCTGCCGAAACAG  
AGGTTGGACAAGACCGGAGGGGTCTCCTGGTTCCAAAGGAGATGTACTCCGGGCTTGTTACGACCTA  
+  
FFFFFFF:FFFFFF,FFF:F,F,FF:FF,FFFFFF::FFFFFFFFF:FFFFFF:FFFFFFFFFFFF  
FFFFFF,FFFFFFFFFFFFFFFFF:FFFFFFFFFFFFFFFFFFFFFFFFFFFF,FFFFFFFFFFFFFFFFFFFF  
@A00155:342:HHGFNDSXY:1:1120:5620:12978 1:N:0:GAACCTAG+TCCGCATA  
GAGAGCGACTTCTCTCGGGCCCACAGCCTTACAGCTGTGGAGCACGGTATCCTCTGCCGAAACAGAGG  
TTGGACAAGACCGGAGGGGTCTCCTAGTTCCAAAGGAGATGTACTCCGGGCTTGTTACGACCTACCG  
+  
FFFFFFFFFFFFFFFFFFFFFFFFFFFF,FFFFFFFFFFFFFFFFFFFF,FFFFFFFFFFFFFFFFFFFF  
FFFFFFFFFFFFFFFFFFFFFFFFFFFFFFFFFFFFFFFFFFFFFFFFFFFFFFFFFFFF:FFFFFFFFFFFFF  
@A00155:342:HHGFNDSXY:1:1120:24144:28494 1:N:0:GAACCTAG+TCCGCATA  
GAGGGCGAGAGAGAGCGACTTCTCTCGGGCCCACAGCCTTACAGCTGTGGAGCACGGTATCCTCTGCC  
GAAACAGAGGTTGGACAAGACCGGAGGGGTCTCCTAGTTCCAAAGGAGATGTACTCCGGGCTTGTTCA  
+  
FFFFF:FFFFFFFFFFFFFFFFFFFFFFFFFFFFFFFFFFFFFFFFFFFFFFFFFFFFFFFFFFFFF:  
FFFFFFFFFFFFFFFFFFFFFFFFFFFFFFFFFFFFFFFFFFFFFFFFFFFFFFFFFFFFFFFFFFFFFFFFFFFF  
@A00155:342:HHGFNDSXY:1:1120:29197:32268 1:N:0:GAACCTAG+TCCGCATA  
ACCTCTGTTTCGGCAGAGGATACCGTGCTCCACAGCTGTAAGGCTGTGGGCCCGAGAGAAGTCGCTCT  
CTCTCGCCCTTACATCCCTCTCGGCATTGAGATGACCATAGGCCAGAGGTGAGTCCTTAAGTGGACA  
+  
FFFFFFFFFFFFFFFFFFFFFFFFFFFFFFFFFFFFFFFFFFFFFFFFFFFF,FFFFFFFFFFFFFFFFFFFF  
FFFFFFFFFFFFFFFFFFFFFFFFFFFFFFFFFFFF:FFFFFFFFFFFFFFFFFFFFFFFFFFFFFFFFFFFFF:  
@A00155:342:HHGFNDSXY:1:1121:11053:8015 1:N:0:GAACCTAG+TCCGCATA  
CTCAATGCCGAGAGGGATGTGGAGGGCGAGAGAGAGCGACTTCTCTCGGGCCCACAGCCTTACAGCTG  
TGGAGCACGGTATCCTCTGCCGAAACAGAGGTTGGACAAGACCGGAGGGGTCTCCTAGTTCCAAAGGA  
+  
FFFFFFFFFFFFFFFFFFFFFFFFFFFFFFFFFFFFFFFFFFFFFFFFFFFFFFFFFFFFFFFFFFFFFFFFFFFF  
FFFFF:FFFFFFFFFFFFFFFFFFFFFFFFFFFF:FFFFFFFFFFFFFFFFFFFFFFFFFFFFFFFFFFFFF  
@A00155:342:HHGFNDSXY:1:1121:11234:8202 1:N:0:GAACCTAG+TCCGCATA  
CTCAATGCCGAGAGGGATGTGGAGGGCGAGAGAGAGCGACTTCTCTCGGGCCCACAGCCTTACAGCTG  
TGGAGCACGGTATCCTCTGCCGAAACAGAGGTTGGACAAGACCGGAGGGGTCTCCTAGTTCCAAAGGA  
+  
FFFFFFFFFFFFFFFFFFFFFFFFFFFFFFFFFFFFFFFFFFFFFFFFFFFFFFFFFFFFFFFFFFFFF:FFFFFFFFFFFF  
FFFFFFFFFFFFFFFFFFFFFFFFFFFFFFFFFFFFFFFFFFFFFFFFFFFFFFFFFFFFFFFFFFFFFFFFFFFF  
@A00155:342:HHGFNDSXY:1:1121:11704:10394 1:N:0:GAACCTAG+TCCGCATA  
CTCTGCCGAAACAGAGGTTGGACAAGACCGGAGGGGTCTCCTGGTTCCAAAGGAGATGTACTCCGGGC  
TTGTTACGACCTACCGTGTAAGTCGTAGTCTAGTAGGCTACCTGACGAGTCCTTTTAGGACGAAAC  
+  
FFFFFFFFFFFF,FFFFFFFFFFFFFFFFFFFFFFFFFFFFFFFFFFFF:FFFFFFFFFFFFF:FFFFFFF:FF  
FFFFFFFFFFFF:FFFFFFFFFFFFFFFFFFFFFFFFFFFFFFFFFFFF:FFFFFFFFFFFFFFFFFFFFFFFFFFFF  
@A00155:342:HHGFNDSXY:1:1121:28989:15217 1:N:0:GAACCTAG+TCCGCATA  
CAGCCTTACAGCTGTGGAGCACGGTATCCTCTGCCGAAACAGAGGTTGGACAAGACCGGAGGGGTCTC  
CTGTTCCAAAGGAGATGTACTCCGGGCTTGTTACGACCTACCGTGTAAGTCGTAGTCTAGTAGGCT  
+  
FFFFFFFFFFFFFFFFFFFFFFFFFFFFFFFFFFFFFFFFFFFFFFFFFFFFFFFFFFFFFFFFFFFFFFFFFFFF  
FFFFFFFFFFFFFFFFFFFFFFFFFFFFFFFFFFFFFFFFFFFFFFFFFFFFF:FFFFFFFFFFFFFFFFFFFFF  
@A00155:342:HHGFNDSXY:1:1121:32922:15483 1:N:0:GAACCTAG+TCCGCATA  
AGGCCAGAGGTGAGTCCTTAAGTGGACACAGCTGATCTAAGGCGGTGTGGTGGGGCATGGGTTTGAAC  
CCCCATGACGGTCGGAGTCTAGTAGGCTCCCTGATGAGTCCGTTCCAAGGACGAAACCGTCGTACTC  
+  
FFFFFFFFFFFFFFFFFFFFFFFFFFFFFFFFFFFFFFFFFFFFFFFFFFFFF:FFFFFFFFFFFFFFFFFFFFF  
FFFFFFFFFFFFFFFFFFFFF:FFFFFFFFFFFFFFFFFFFFFFFFFFFFFFFFFFFFFFFFFFFFFFFFFFFFF



[illegible]

```
@A00155:342:HHGFNDSXY:1:1123:12653:28228 1:N:0:GAACCTAG+TCCGCATA  
AGCGACTTCTCTCGGGCCCACAGCCTTACAGCTGTGGAGCACGGTATCCTCTGCCGAAACAGAGGTTG  
GACAAGACCGGAGGGGTCTCCTAGTTCCAAAGGAGATGTACTCCGGGCTTGTTACGACCTACCGTGT  
+  
FFFFFFFFFFFFFFFFFFFFFFFFFFFFFFFFFFFFF,FFFFFFFFFFFFFFFFFFFFFFFFFFFFFFFFFFFF  
FFFFFFFFFFFFFFFFFFFFFFFFFFFFFFFFFFFFFFFFFFFFFFFFFFFFFFFFFFFFFFFFFFFFFFFFFFFF  
@A00155:342:HHGFNDSXY:1:1124:32090:10410 1:N:0:GAACCTAG+TCCGCATA  
GTATCCTCTGCCGAAACAGAGGTTGGACAAGACCGGAGGGGTCTCCTAGTTCCAAAGGAGATGTACTC  
CGGGCTTGTTTCACGACCTACCGTGTAAGTCGTAGTCTAGTAGGCTACCTGACGAGTCCTTTTTAGGAC  
+  
FFFFFFFFFFFFFFFFFFFFFFFFFFFFFFFFFFFFFFFFFFFFFFFFFFFFFFFFFFFFFFFFFFFFFFFFFFFF  
FFFFFFFFFFFFFFFFFFFFFFFFFFFFFFFFFFFFFFFFFFFFFFFFFFFFFFFFFFFFFFFFFFFFFFFFFFFF  
@A00155:342:HHGFNDSXY:1:1124:19587:25019 1:N:0:GAACCTAG+TCCGCATA  
GGATGTGGAGGGCGAGAGAGAGCGACTTCTCTCGGGCCCACAGCCTTACAGCTGTGGAGCACGGTATC  
CTCTGCCGAAACAGAGGTTGGACAAGACCGGAGGGGTCTCCTAGTTCCAAAGGAGATGTAGTCC  
+  
FFFFFFFFFFFFFFFFFFFFFFFFFFFFFFFFFFFFFFFFFFFFFFFFFFFFFFFFFFFFFFFFFFFFFFFFFFFF  
FFFFFFFFFFFFFFFFFFFFFFFFFFFFFFFFFFFFFFFFFFFFFFFFFFFFFFFFFFFFFFFFFFFFFFFFFFFF,  
FF  
@A00155:342:HHGFNDSXY:1:1124:11785:26381 1:N:0:GAACCTAG+TCCGCATA  
TGTGGAGGGCGAGAGAGAGCGACTTCTCTCGGGCCCACAGCCTTACAGCTGTGGAGCACGGTATCCTC  
TGCCGAAACAGAGGTTGGACAAGACCGGAGGGGTCTCCTGGTTCCAAAGGAGATGTACTCCGGGCTTG  
+  
FFFFFFFFFFFFFFFFFFFFFFFFFFFFFFFFFFFFFFFFFFFFFFFFFFFFFFFFFFFFFFFFFFFFFFFFFFFF  
FFFFFFFFFFFFFFFFFFFFFFFFFFFFFFFFFFFFFFFFFFFFFFFFFFFFFFFFFFFFFFFFFFFFFFFFFFFF  
@A00155:342:HHGFNDSXY:1:1124:19397:27226 1:N:0:GAACCTAG+TCCGCATA  
TATCCTCTGCCGAAACAGAGGTTGGACAAGACCGGAGGGGTCTCCTAGTTCCAAAGGAGATGTACTCC  
GGGCTTGTTTCACGACCTACCGTGTAAGTCGTAGTCTAGTAGGCTACCTGACGAGTCCTTTTTAGGACG  
+  
FFFFFFFFFFFFFFFFFFFFFFFFFFFFFFFFFFFFFFFFFFFFFFFFFFFFFFFFFFFFFFFFFFFFFFFFFFFF  
FFFFFFFFFFFFFFFFFFFFFFFFFFFFFFFFFFFFFFFFFFFFFFFFFFFFFFFFFFFFFFFFFFFFFFFFFFFF  
@A00155:342:HHGFNDSXY:1:1124:2166:28385 1:N:0:GAACCTAG+TCCGCATA  
CGAGAGAGAGCGACTTCTCTCGGGCCCACAGCCTTACAGCTGTGGAGCACGGTATCCTCTGCCGAAAC  
AGAGGTTGGACAAGACCGGAGGGGTCTCCTAGTTCCAAAGGAGATGTACTCCGGGCTTGTTTCACGACC  
+  
FFFFFFFFFFFFFFFFFFFFFFFFFFFFFFFFFFFFFFFFFFFFFFFFFFFFFFFFFFFFFFFFFFFFFFFFFFFF  
FFFFFFFFFFFFFFFFFFFFFFFFFFFFFFFFFFFFFFFFFFFFFFFFFFFFFFFFFFFFFFFFFFFFFFFFFFFF  
@A00155:342:HHGFNDSXY:1:1124:2492:31172 1:N:0:GAACCTAG+TCCGCATA  
CTTCTCTCGGGCCCACAGCCTTACAGCTGTGGAGCACGGTATCCTCTGCCGAAACAGAGGTTGGACAA  
GACCGGAGGGGTCTCCTAGTTCCAAAGGAGATGTACTCCGGGCTTGTTTCACGACCTACCGTGTAAGTC  
+  
FFFFFFFFFFFFFFFFFFFFFFFFFFFFFFFFFFFFFFFFFFFFFFFFFFFFFFFFFFFFFFFFFFFFFFFFFFFF  
FFFFFFFFFFFFFFFFFFFFFFFFFFFFFFFFFFFFFFFFFFFFFFFFFFFFFFFFFFFFFFFFFFFFFFFFFFFF  
@A00155:342:HHGFNDSXY:1:1125:26648:4053 1:N:0:GAACCTAG+TCCGCATA  
GTATCCTCTGCCGAAACAGAGGTTGGACAAGACCGGAGGGGTCTCCTGGTTCCAAAGGAGATGTACTC  
CGGGCTTGTTTCACGACCTACCGTGTAAGTCGTAGTCTAGTAGGCTACCTGACGAGTCCTTTTTAGGAC  
+  
FFFFFFFFFFFFFFFFFFFFFFFFFFFFFFFFFFFFFFFFFFFFFFFFFFFFFFFFFFFFFFFFFFFFFFFFFFFF  
FFFFFFFFFFFFFFFFFFFFFFFFFFFFFFFFFFFFFFFFFFFFFFFFFFFFFFFFFFFFFFFFFFFFFFFFFFFF  
@A00155:342:HHGFNDSXY:1:1125:25726:10222 1:N:0:GAACCTAG+TCCGCATA  
CACCTCTGGCCTATGGTCATCTCAATGCCGAGAGGGATGTGGAGGGCGAGAGAGAGCGACTTCTCTCG  
GGCCCCACAGCCTTACAGCTGTGGAGCACGGTATCCTCTGCCGAAACAGAGGTTGGACAAGACCGGAG  
+
```

@A00155:342:HHGFNDSXY:1:1125:21829:10645 1:N:0:GAACCTAG+TCCGCATA  
GTCCA CTTAAGGACTCTCCTCTGGCCTATGGTCATCTCAATGCCGAGAGGGATGTGGAGGGCGAGAGA  
GAGCGACTTCTCTCGGGCCCACAGCCTTACAGCTGTGGAGCACGGTATCCTCTGCCGAAACAGAGGTT  
+  
FFFFFFFFFFFFFFFFFFFFFFFFFFFFFFFFFFFFFFFFFFFFFFFFFFFFFFFFFFFFFFFFFFFFFFFFFFFFF:  
FFFFFFFFFFFFFFFFFFFFFFFFFFFFFFFFFFFFFFFFFFFFFFFFFFFFFFFFFFFFFFFFFFFFFFFFFFFFF:  
@A00155:342:HHGFNDSXY:1:1125:23818:15749 1:N:0:GAACCTAG+TCCGCATA  
TCGGCAGAGGATACCGTGCTCCACAGCTGTAAGGCTGTGGGCCCGAGAGAAGTCGCTCTCTCTCGCCC  
TCCACATCCCTCTCGGCATTGAGATGACCATAGGCCAGAGGTGAGTCCTTAAGTGGACAC  
+  
FFFFFFFFFFFFFFFFFFFFFFFFFFFFFFFFFFFFFFFFFFFFFFFFFFFFFFFFFFFFFFFFFFFFFFFFFFFFF:  
FFFFFFFFFFFFFFFFFFFFFFFFFFFFFFFFFFFFFFFFFFFFFFFFFFFFFFFFFFFFFFFFFFFFFFFFFFFFF:  
@A00155:342:HHGFNDSXY:1:1125:29378:22247 1:N:0:GAACCTAG+TCCGCATA  
GGACTCACCTCTGGCCTATGGTCATCTCAATGCCGAGAGGGATGTGAAGGGCGAGAGAGAGCGACTTC  
TCTCGGGCCCACAGCCTTACAGCTGTGGAGCACGGTATCCTCTGCC  
+  
FFFFFFFFFFFFFFFFFFFFFFFFFFFFFFFFFFFFFFFFFFFFFFFFFFFFFFFFFFFFFFFFFFFFFFFFFFFFF:  
FFFFFFFFFFFFFFFFFFFFFFFFFFFFFFFFFFFFFFFFFFFFFFFFFFFFFFFFFFFFFFFFFFFFFFFFFFFFF:  
@A00155:342:HHGFNDSXY:1:1125:17418:29246 1:N:0:GAACCTAG+TCCGCATA  
CCATGCCCCGCCACACCGCCTTAGATCAGCTGTGTCCACTTAAGGACTCACCTCTGGCCTATGGTCAT  
CTCAATGCCGAGAGGGATGTGGAGGGCGAGAGAGAGCGACTTCTCTCGGGCCCACAGCCTTACAGCTG  
+  
FFFFFFFFFFFFFFFFFFFFFFFFFFFFFFFFFFFFFFFFFFFFFFFFFFFFFFFFFFFFFFFFFFFFFFFFFFFFF:  
FFFFFFFFFFFFFFFFFFFFFFFFFFFFFFFFFFFFFFFFFFFFFFFFFFFFFFFFFFFFFFFFFFFFFFFFFFFFF:  
@A00155:342:HHGFNDSXY:1:1126:17553:13949 1:N:0:GAACCTAG+TCCGCATA  
GAGAGAGCGACTTCTCTCGGGCCCACAGCCTTACAGCTGTGGAGCACGGTATCCTCTGCCGAAACAGA  
GTTTGGACAAGACCGGAGGGGTCTCCTAGTTCAAAGGAGATGTACTCCGGGCTTGACACGACCTAC  
+  
FFFFFFFFFFFFFFFFFFFFFFFFFFFFFFFFFFFFFFFFFFFFFFFFFFFFFFFFFFFFFFFFFFFFFFFFFFFFF:  
FFFFFFFFFFFFFFFFFFFFFFFFFFFFFFFFFFFFFFFFFFFFFFFFFFFFFFFFFFFFFFFFFFFFFFFFFFFFF:  
@A00155:342:HHGFNDSXY:1:1126:13548:36417 1:N:0:GAACCTAG+TCCGCATA  
GAGGGCGAGAGAGAGCGACTTCTCTCGGGCCCACAGCCTTTCAGCTGTGGAGCACGGTATCCTCTGCC  
GAAACAGAGGTTGGACAAGACCGGAGGGGTCTCCTAGTTCAAAGGAGATGTACTCCGGGCTTGTTCA  
+  
FFFFFFFFFFFFFFFFFFFFFFFFFFFFFFFFFFFFFFFFFFFFFFFFFFFFFFFFFFFFFFFFFFFFFFFFFFFFF:  
FFFFFFFFFFF,F:,,F:, : FFFFFFFFFFFFFFFFFFFFFFFFFFFFFFFFFFFFFFFFFFFFFFFFFFFFFFFF:  
@A00155:342:HHGFNDSXY:1:1127:1958:6762 1:N:0:GAACCTAG+TCCGCATA  
AGAGAGAGCGACTTCTCTCGGGCCCACAGCCTTACAGCTGTGGAGCACGGTATCCTCTGCCGAAACAG  
AGGTTGGACAAGACCGGAGGGGTCTCCTGTTCAAAGGAGATGTACTCCGGGCTTGTTACGACCTA  
+  
FFFFFFFFFFFFFFFFFFFFFFFFFFFF,,F:, : FFFFFFFFFFFFFFFFFFFFFFFFFFFFFFFFFFFFFFFFFFFFFFFF:  
FFFFFFFFFFFFFFFFFFFFFFFFFFFFFFFFFFFFFFFFFFFFFFFFFFFFFFFFFFFFFFFFFFFFFFFFFFFFF:  
@A00155:342:HHGFNDSXY:1:1127:2862:11490 1:N:0:GAACCTAG+TCCGCATA  
ATCTCAATGCCGAGAGGGATGTGGAGGGCGAGAGAGAGCGACTTCTCTCGGGCCCACAGCCTTACAGC  
TGTGGAGCACGGTATCCTCTGCCGAAACAGAGGTTGGACAAGACCGGAGGGGTCTCCTAGTTCAAAG  
+  
FFFFFFFFFF:FFFFFFFFF,FFFFFFFF:F:FFFFFF:FF:FFFFFFFFFFFFFFFFF,FFFFFFFFF,FFFFFFFFF  
FFFFFFFFFFFFFFFFFFFFFFFFFFFFFFFFFFFFFFFFFFFFFFFFFFFFFFFFFFFFFFFFFFFFFFFFFFFFF:  
@A00155:342:HHGFNDSXY:1:1127:27968:14356 1:N:0:GAACCTAG+TCCGCATA  
GTCATCTCAATGCCGAGAGGGATGTGGAGGGCGAGAGAGAGCGACTTCTCTCGGGCCCACAGCCTTAC  
AGCTGTGGAGCACGGTATCCTCTGCCGAAACAGAGGTTGGACAAGACCGGAGGGGTCTCCTTGTTCCA  
+  
FFFFFFFFFFFFFFFFFFFFFFFFFFFFFFFFFFFFFFFFFFFFFFFFFFFFFFFFFFFFFFFFFFFFFFFFFFFFF:  
FFFFFFFFFFFFFFFFFFFFFFFFFFFFFFFFFFFFFFFFFFFFFFFFFFFFFFFFFFFFFFFFFFFFFFFFFFFFF,  
@A00155:342:HHGFNDSXY:1:1127:27968:14356 1:N:0:GAACCTAG+TCCGCATA

@A00155:342:HHGFNDSXY:1:1127:18349:19993 1:N:0:GAACCTAG+TCCGCATA  
CAGCCTTACAGCTGTGGAGCACGGTATCCTCTGCCGAAACAGAGGTTGGACAAGACCGGAGGGGTCTC  
CTAGTTCCAAAGGAGATGTACTCCGGGCTTGTTACGACCTACCGTGTAAGTCGTAGTCTAGTAGGCT  
+  
FFFFFFFF:FFFFFFFFFFFFFFFFFFFFFFFFFFFFFFFFFFFFFFFFFFFFFFFFFFFFFFFFFFFFF  
FFFFFFFFFFFFFFFFFFFFFFFFFFFFFFFFFFFFFFFFFFFFFFFFFFFFFFFFFFFFFFFFFFFFFF:  
@A00155:342:HHGFNDSXY:1:1127:28185:28354 1:N:0:GAACCTAG+TCCGCATA  
ATCTCAATGCCGAGAGGGATGTGGAGGGCGAGAGAGAGCGACTTCTCTCGGGCCCACAGCCTTACAGC  
TGTGGAGCACGGTATCCTCTGCCGAAACAGAGGTTGGACAAGACCGGAGGGGTCTCCTAGTTCCAAAG  
+  
FFFFFFFFFFFFFFFFFFFFFFFFFFFFFFFFFFFFFFFFFFFFFFFFFFFFFFFFFFFFFFFFFFFFFFF  
FFFFFFFFFFFFFFFFFFFFFFFFFFFFFFFFFFFFFFFFFFFFFFFFFFFFFFFFFFFFFFFFFFFFFF:  
@A00155:342:HHGFNDSXY:1:1127:27877:28510 1:N:0:GAACCTAG+TCCGCATA  
ATCTCAATGCCGAGAGGGATGTGGAGGGCGAGAGAGAGCGACTTCTCTCGGGCCCACAGCCTTACAGC  
TGTGGAGCACGGTATCCTCTGCCGAAACAGAGGTTGGACAAGACCGGAGGGGTCTCCTAGTTCCAAAG  
+  
FFFFFFFFFFFFFFFFFFFFFFFFFFFFFFFFFFFFFFFFFFFFFFFFFFFFFFFFFFFFFFFFFFFFFFF  
FFFFFFFFFFFFFFFFFFFFFFFFFFFFFFFFFFFFFFFFFFFFFFFFFFFFFFFFFFFFFFFFFFFFFF:  
@A00155:342:HHGFNDSXY:1:1127:28718:28682 1:N:0:GAACCTAG+TCCGCATA  
TCTCAATGCCGAGAGGGATGTGGAGGGCGAGAGAGAGCGACTTCTCTCGGGCCCACAGCCTTACAGCT  
GTGGAGCACGGTATCCTCTGCCGAAACAGAGGTTGGACAAGACCGGAGGGGTCTCCTAGTTCCAAAG  
+  
:::FFFFFFFF::FFFF:FFFFFF:FF:F:FFFFFFFFFFFFFFFF:,FFFFFFFFFFFF:FF,FFFF  
FFFFFF,FFF:FF:F,FFFFFFFFFFFFFFFFFFFF:,FFFFFFFFFFFF,F,FFFF,F:,FFF:FFF:  
@A00155:342:HHGFNDSXY:1:1127:8856:31015 1:N:0:GAACCTAG+TCCGCATA  
TCTCTCGGGCCCACAGCCTTACAGCTGTGGAGCACGGTATCCTCTGCCGAAGCAGAGGTTGGACAAGA  
CCGAGAGGGGTCTCCTAGTTCCAAAGGAGATGTACTCCGGGCTTGTTACGACCTACCGTGTAAGTCGT  
+  
FFFFFFFFFFFFFFFFFFFFFFFFFFFFFFFFFFFFFFFFFFFFFFFFFFFFFFFFFFFFFFFFFFFFFFF  
FFFFFFFFFFFFFFFFFFFF:FFFFFFF:FFFFFFFFFFFFFFFFFFFFFFFFFFFFFFFFFFFFFFFFFFFFF  
@A00155:342:HHGFNDSXY:1:1127:16875:31250 1:N:0:GAACCTAG+TCCGCATA  
CCCACCACACCGCCTTAGATCAGCTGTGTCCACTTAAGGACTCACCTCTGGCCTATGGTCATCTCAAT  
GCCGAGAGGGATGTGGAGGGCGAGAGAGAGCGACTTCTCTCGGGCCCACAGCCTTACAGCTGTGGAGC  
+  
FFFFFFFFFFFFFFFFFFFF:FFFFFFFFFFFFFFFFFFFFFFFFFFFFFFFFFFFFFFFFFFFFFFFFFFFFF  
FFFFFFFFFFFFFFFFFFFF:FFFFFFFFFFFFFFFFFFFFFFFFFFFFFFFFFFFFFFFFFFFFFFFFFFFFF  
@A00155:342:HHGFNDSXY:1:1128:21549:7091 1:N:0:GAACCTAG+TCCGCATA  
GGATGTGGAGGGCGAGAGAGAGCGACTTCTCTCGGGCCCACAGCCTAACAGCTGTGGAGCACGGTATC  
CTCTGCCGAAACAGAGGTTGGACAAGACCGGAGGGGTCTCCTAGTTCCAAAGGAGATGTACTCC  
+  
FFFFFFFFFFFFFFFFFFFFFFFFFFFFFFFFFFFFFFFFFFFFFFFFFFFFFFFFFFFFFFFFFFFFFFF  
FFFFFFFFFFFFFFFFFFFFFFFFFFFFFFFFFFFFFFFFFFFFFFFFFFFFFFFFFFFFFFFFFFFFFFF  
@A00155:342:HHGFNDSXY:1:1128:25753:15468 1:N:0:GAACCTAG+TCCGCATA  
GAGAGGGATGTGGAGGGCGAGAGAGAGCGACTTCTCTCGGGCCCACAGCCTTACAGCTGTGGAGCACG  
GTATCCTCTGCCGAAACAGAGGTTGGACAAGACCGGAGGGGTCTCCTAGTTCCAAAGGAGATGTACTC  
+  
FFFFFFFFFFFFFFFFFFFFFFFFFFFFFFFFFFFFFFFFFFFFFFFFFFFFFFFFFFFFFFFFFFFFFFF  
FFFFFFFFFFFFFFFFFFFFFFFFFFFFFFFFFFFFFFFFFFFFFFFFFFFFFFFFFFFFFFFFFFFFFFF  
@A00155:342:HHGFNDSXY:1:1129:31638:9377 1:N:0:GAACCTAG+TCCGCATA  
AGAGCGACTTCTCTCGGGCCCACAGCCTTACAGCTGTGGAGCACGGTATCCTCTGCCGAAACAGAGGT  
TGGACAAGACCGGAGGGGTCTCCTAGTTCCAAAGGAGATGTACTCCAGGCTTGTTACGACCTACCGT  
+  
FFFFFFFFFFFFFFFFFFFFFFFFFFFFFFFFFFFFFFFFFFFFFFFFFFFFFFFFFFFFFFFFFFFFFFF  
FFFFFFFFFFFFFFFFFFFFFFFFFFFFFFFFFFFFFFFFFFFFFFFFFFFFFFFFFFFFFFFFFFFFFFF  
@A00155:342:HHGFNDSXY:1:1129:31638:9377 1:N:0:GAACCTAG+TCCGCATA  
AGAGCGACTTCTCTCGGGCCCACAGCCTTACAGCTGTGGAGCACGGTATCCTCTGCCGAAACAGAGGT  
TGGACAAGACCGGAGGGGTCTCCTAGTTCCAAAGGAGATGTACTCCAGGCTTGTTACGACCTACCGT  
+

[illegible]

$+$ 

@A00155:342:HHGFNDSXY:1:1132:8440:36965 1:N:0:GAACCTAG+TCCGCATA  
TGTTTCGGCAGAGGATACCGTGCTCCACAGCTGTAAGGCTGTGGGCCCAGAGAAGTCGCTCTCTCTC  
GCCCTCCACATCCCTCTCGGCATTGAGATGACCATAGGCCAGAGGTGAGTCCTTAAGTGACACAGCT

+

@A00155:342:HHGFNDSXY:1:1132:15221:37027 1:N:0:GAACCTAG+TCCGCATA  
AGGGATGTGGAGGGCGAGAGAGAGCGACTTCTCTCGGGCCACAGCCTTACAACCTGTGGAGCACGGTA  
TCCTCTGCCGAAACAGAGGTTGGACAAGACCGGAGGGGTCTCCTAGTTCCAAAGGAGATGTACTCCGG

+

@A00155:342:HHGFNDSXY:1:1133:17779:8923 1:N:0:GAACCTAG+TCCGCATA  
CACCTCTGGCCTATGGTCATCTCAATGCCGAGAGGGATGTGAAGGGCGAGAGAGAGCGACTTCTCTCG  
GGCCACAGCCTTACAGCTGTGGAGCACGGTATCCTCTGCCGAAACAGAGGTTGGACAAGACCGGAGG

+

@A00155:342:HHGFNDSXY:1:1133:31620:10786 1:N:0:GAACCTAG+TCCGCATA  
CTCAATGCCGAGAGGGATGTAGAGGGCGAGAGAGAGCGACTTCTCTCGGGCCCACAGCCTTACAGCTG  
TGGAGCACGGTATCCTCTGCCGAAACAGAGGTTGGACAAGACCGGAGGGGTCTCCTAGTTCCAAAGGA

+

@A00155:342:HHGFNDSXY:1:1133:17580:12273 1:N:0:GAACCTAG+TCCGCATA  
CACCTCTGGCCTATGGTCATCTCAATGCCGAGAGGGATGTGAAGGGCGAGAGAGAGCGACTTCTCTCG  
GGCCACAGCCTTACAGCTGTGGAGCACGGTATCCTCTGCCGAAACAGAGGTTGGACAAGACCGGAGG

+

@A00155:342:HHGFNDSXY:1:1133:28791:19163 1:N:0:GAACCTAG+TCCGCATA  
AGAGAGAGCGACTTCTCTCGGGCCACAGCCTTACAGCTGTGGAGCACGGTATCCTCTGCCGAAACAG  
AGGTTGGACAAGACCGGAGGGGTCTACTAGTTCCAAAGGAGATGTACTCCGGGCTTGTTACAGACCTA

 $+$ 

@A00155:342:HHGFNDSXY:1:1133:1994:33755 1:N:0:GAACCTAG+TCCGCATA  
AAGGACTCACCTCTGGCCTATGGTCATCTCAATGCCGAGAGGGATGTGAAGGGCGAGAGAGAGCGACT  
TCTCTCGGGCCCCACAGCCTTACAGCTGTGGAGCACGGTATCCTCTGCCGAAAGAGAGGGTTGGACAAGA

+

@A00155:342:HHGFNDSXY:1:1134:25834:26005 1:N:0:GAACCTAG+TCCGCATA  
TGTCCACTTAAGGACTCACCTCTGGCCTATGGTCATCTCAATGCCGAGAGGGATGTGGAGGGCGAGAG  
AGAGCGACTTCTCTCGGGCCACAGCCTTACAGCTGTGGAGCAGGGTATCCTCTGCCGAAACAGAGGT

+

[illegible]

[illegible]

@A00155:342:HHGFNDSXY:1:1138:2383:13103 1:N:0:GAACCTAG+TCCGCATA  
ACCTCTGTTTCGGCAGAGGATACCGTGCTCCACAGCTGTAAAGGCTGTGTGCCCGAGAGAAGTCGCTCT  
CTCTCGCCCTCCACATCCCTCTCGGCATTGAGATGACCATAGGCCAGAGGTGAGTCCTTAAGTGGAC  
+  
FFFFFFFFFFFFFFFFFFFFFFFFFFFFF,FF:FFFFFFFFFFFFFFFFFFFF,FFFFFF,FFFFFFFFFFFFFFFFFFFFF  
FFFFFFFFFFFFFFFFFFFFFFFFFFFFF::F,FFFFFFFFFFFFFFFFFFFF,FFFFFFFFFFFFF::FFFFFFFFFFFF  
@A00155:342:HHGFNDSXY:1:1138:2645:27398 1:N:0:GAACCTAG+TCCGCATA  
ATCTCAATGCCGAGAGGGATGTGGAGGGCGAGAGAGAGCGACTTCTCTCGGGCCCACAGCCTTACAGC  
TGTGGAGCACGGTATCCTCTGCCGAAACAGAGGTTGGACAAGACCGGAGGGGTCTCCTGGTTCCAAAG  
+  
FFFFFFFFFFFFFFFFFFFFFFFFFFFFFFFFFFFFFFFFFFFFFFFFFFFFFFFFFFFFFFFFFFFFFFFFFFFFF  
FFFFFFFFF:FFFFFFFFFFFFFFFFFFFFFFFFFFFFFFFFFFFFFFFFFFFFFFFFFFFFFFFFFFFFFFFFFFFFF  
@A00155:342:HHGFNDSXY:1:1139:19081:9424 1:N:0:GAACCTAG+TCCGCATA  
ATGCCGAGAGGGATGTGGAGGGCGAGAGAGAGCGACTTCTCTCGGGCCCACAGCCTTACAGCTGTGGA  
GCACGGTATCCTCTGCCGAAACAGAGGTTGGACAAGACCGGAGGGGTCTCCTAGTTCCAAAGGAGA  
+  
FFFFFFFFFFFFFFF,:FF:FF:FFFFFFFFF:FFFFFFFFFFF:FFFFFFFFFFFFFFF:,FFFFFFFFF,FF  
FFFFFFFFFFFFFFF,FFF::FFFFFFFFF:FFFFFFFFF:FFF:FF:FFFFFFFFFFFFFFF,:FFFFFFF  
@A00155:342:HHGFNDSXY:1:1139:21766:12446 1:N:0:GAACCTAG+TCCGCATA  
TCTCTCGGGCCCACAGCCTTACAGCTGTGGAGCACGGTATCCTCTGCCGAAACAGAGGTTGGACAAGA  
CCGGAGGGGTCTCCTAGTTCCAAAGGAGATGTACTCCGGGCTTGTTACAGACCTACCGTGTAAGTCGT  
+  
FFFFFFFFFFFFFFFFFFFFFFFFFFFFFFFFFFFFF:FFFFFFFFFFFFFFFFFFFFFFFFFFFFFFFFFFFFF  
FFFFFFFFFFFFFFFFFFFFFFFFFFFFFFFFFFFFF:FFFFFFFFFFFFFFFFFFFFFFFFFFFFFFFFFFFFF  
@A00155:342:HHGFNDSXY:1:1140:4300:2738 1:N:0:GAACCTAG+TCCGCATA  
GGATGTGGAGGGCGAGAGAGAGCGACTTCTCTCGGGCCCACAGCCTTACAGCTGTGGAGCACGGTATC  
TCTGCCGAAACAGAGGTTGGACAAGACCGGAGGGGTCTCCTAGTTCCAAAGGAGATGTACTCC  
+  
FFFFFFFFFFFFFFFFFFFFFFFFFFFFFFFFFFFFFFFFFFFFFFFFFFFFFFFFFFFFFFFFFFFFFFFFFFFFF  
FFFFFFFFFFFFFFFFFFFFFFFFFFFFFFFFFFFFFFFFFFFFFFFFFFFFFFFFFFFFFFFFFFFFFFFFFFFFF  
@A00155:342:HHGFNDSXY:1:1140:30834:5729 1:N:0:GAACCTAG+TCCGCATA  
CTTCTCTCGGGCCCACAGCCTTACAGCTGTGGAGCACGGTATCCTCTGCCGAAACAGAGGTTGGACAA  
GACCGGAGGGGTCTCCTAGTTCCAAAGGAGATGTACTCCGGGCTTGTTACAGACCTACCGTGTAAGTC  
+  
FFFFFFFFFFFFFFFFFFFFFFFFFFFFFFFFFFFFFFFFFFFFFFFFFFFFFFFFFFFFFFFFFFFFFFFFFFFFF  
FFFFFFFFFFFFFFFFFFFFFFFFFFFFFFFFFFFFFFFFFFFFFFFFFFFFFFFFFFFFFFFFFFFFFFFFFFFFF  
@A00155:342:HHGFNDSXY:1:1140:5050:10488 1:N:0:GAACCTAG+TCCGCATA  
GGGCGAGAGAGAGCGACTTCTCTCGGGCCCACAGCCTTACAGCTGTGGAGCACGGTATCCTCTGCCGA  
AACAGAGGTTGGACAAGACCGGAGGGGTCTCCTGGTTCCAAAGGAGATGTACTCCGGGCTTGTTACAG  
+  
FFFFFFFFFFFFFFFFFFFFFFFFFFFFFFFFFFFFF,F,FFFFFFFFFFFFFFFFFFFFFFFFFFFFFFFFFFFFF:FFFFFFF  
FFF:F,FFFFFFFFFFFFFFFFFFFFFFFFFFFFFFFFFFFFFFFFFFFFFFFFFFFFFFFFFFFFFFFFFFFFF:FFFFFFFFFFFF:  
@A00155:342:HHGFNDSXY:1:1140:31693:12759 1:N:0:GAACCTAG+TCCGCATA  
CTTAAGGACTCACCTCTGGCCTATGGTCATCTCAATGCCGAGAGGGATGTGGAGGGCGAGAGAGAGCG  
ACTTCTCTCGGGCCCACAGCCTTACAGCTGTGGAGCACGGTATCCTCTGCCGAAACAGAGGTTGGACA  
+  
FFFFFFFFFFFFFFFFFFFFFFFFFFFFF,FFFFFFFFFFFFFFFFFFFFFFFFFFFFF,F,FFFFFFFFFFFFFFFFFFFFF  
FFFFFFFFFFFFFFFFFFFFFFFFFFFFFFFFFFFFFFFFFFFFFFFFFFFFFFFFFFFFFFFFFFFFFFFFFFFFF  
@A00155:342:HHGFNDSXY:1:1140:24189:16203 1:N:0:GAACCTAG+TCCGCATA  
ATCTCAATGCCGAGAGGGATGTAGAGGGCGAGAGAGAGCGACTTCTCTCGGGCCCACAGCCTTACAGC  
TGTGGAGCACGGTATCCTCTGCCGAAACAGAGGTTGGACAAGACCGGAGGGGTCTCCTAGTTCCAAAG  
+  
FFFFFFFFFFFFFFFFFFFF:FFFFFFF:FFFFFFFFFFFFFFFFFFFFFFFFFFFFF:FFFFFFFFFFFFFFFFFFFFF:FFFFFFFFFFFF  
FFFFFFFFFFFFFFFFFFFFFFFFFFFFFFFFFFFFFFFFFFFFFFFFFFFFFFFFFFFFFFFFFFFFFFFFFFFFF:  
@A00155:342:HHGFNDSXY:1:1140:24189:16203 1:N:0:GAACCTAG+TCCGCATA  
ATCTCAATGCCGAGAGGGATGTAGAGGGCGAGAGAGAGCGACTTCTCTCGGGCCCACAGCCTTACAGC  
TGTGGAGCACGGTATCCTCTGCCGAAACAGAGGTTGGACAAGACCGGAGGGGTCTCCTAGTTCCAAAG



```
@A00155:342:HHGFNDSXY:1:1140:30129:16971 1:N:0:GAACCTAG+TCCGCATA
GTCATCTCAATGCCGAGAGGGATGTGGAGGGCGAGAGAGAGCGACTTCTCTCGGGCCCACAGCCTTAC
AGCTGTGGAGCACGGTATCCTCTGCCGAAACAGAGGTTTGACAAGACCGGAGGGGTCTCCTGGTTCCA
+
FFFFFFFFFFFFFFFFFFFFFFFFFFFFFFFFFFFFFFFFFFFFFFFFFFFFFFFFFFFFFFFFFFFFF
FFFFFFFFFFFFFFFFFFFFFFFFFFFFFFFFFFFFFFFFFFFFFFFFFFFFFFFFFFFFFFFFFFFFFFF
@A00155:342:HHGFNDSXY:1:1140:28510:20713 1:N:0:GAACCTAG+TCCGCATA
GCGACTTCTCTCGGGCCCCACAGCCTTACAGCTGTGGAGCACGGTATCCTCTGCCGAAACAGAGGTTGG
ACAAGACCGGAGGGGTCTCCTAGTTCAAAGGAGATGTACTCCGGGCTTGTTCACGACCTACCGTGTA
+
FFFFFFFFFFFFFFFFFFFFFFFFFFFFFFFFFFFFFFFFFFFFFFFFFFFFFFFFFFFFFFFFFFFFF
FFFF:FFFFFFFFFFFFFFFFFFFFFFFFFFFFFFFFFFFFFFFFFFFFFFFFFFFFFFFFFFFFFFFFFF
@A00155:342:HHGFNDSXY:1:1141:14832:3067 1:N:0:GAACCTAG+TCCGCATA
GTCCACTTAAGGACTCTCCTCTGGCCTATGGTCATCTCAATGCCGAGAGGGATGTGGAGGGCGAGAGA
GAGCGACTTCTCTCGGGCCCCACAGCCTTACAGCTGTGGAGCACGGTATCCTCTGCCGAAACAGAGGTT
+
FFFFFFFFFFFFFFFFFFFFFFFFFFFFFFFFFFFFFFFFFFFFFFFFFFFFFFFFFFFFFFFFFFFFF
FFFFFFFFFFFFFFFFFFFFFFFFFFFFFFFFFFFFFFFFFFFFFFFFFFFFFFFFFFFFFFFFFFFFFFF, FF:FFFFFFFFFFFFFFFFFFFFFFFFFFFFFFFFFFFFFFFFFFFFFFFFFFFFFFFFFFFFF
@A00155:342:HHGFNDSXY:1:1141:32624:10113 1:N:0:GAACCTAG+TCCGCATA
ATCTCAATGCCGAGAGGGATGTGGAGGGCGAGAGAGAGCGACTTCTCTCGGGCCCACAGCCTTACAGC
TGTGGAGCACGGTATCCTCTGCCGAAACAGAGGTTGGACAAGACCGGAGGGGTCTCCTGGTTCAAAG
+
FFFFFFFFFFFFFFFFFFFFFFFFFFFFFFFFFFFFFFFFFFFFFFFFFFFFFFFFFFFFFFFFFFFFF
FFFFFFFFFFFFFFFFFFFFFFFFFFFFFFFFFFFFFFFFFFFFFFFFFFFFFFFFFFFFFFFFFFFFFFF, FFFF:FFFFFFFFFFFFFFFFFFFFFFFFFFFFFFFFFFFFFFFFFFFFFFFFFFFFFFFFFFFFF
@A00155:342:HHGFNDSXY:1:1141:23692:26897 1:N:0:GAACCTAG+TCCGCATA
GAGAGGGATGTGGAGGGCGAGAGAGAGCGACTTCTCTCGGGCCCACAGCCTTACAGCTGTGGAGCACG
GTATCCTCTGCCGAAACAGAGGTTGGACAAGACCGGAGGGGTCTCCTGGTTCAAAGGAGATGTACT
+
FFFFFFFFFFFFFFFFFFFFFFFFFFFFFFFFFFFFFFFFFFFFFFFFFFFFFFFFFFFFFFFFFFFFF
FFFFFFFFFFFFFFFFFFFFFFFFFFFFFFFFFFFFFFFFFFFFFFFFFFFFFFFFFFFFFFFFFFFFFFF
@A00155:342:HHGFNDSXY:1:1141:12147:29669 1:N:0:GAACCTAG+TCCGCATA
TATCCTCTGCCGAAACAGAGGTTGGACAAGACCGGAGGGGTCTCCTAGTTCAAAGGAGATGTACTCC
GGGCTTGTTCACGACCTACCGTGTAAGTCGTAGTCTAGTAGGCTACCTGACGAGTCCTTTTTAGGACG
+
FFFFFFFFFFFFFFFFFFFFFFFFFFFFFFFFFFFFFFFFFFFFFFFFFFFFFFFFFFFFFFFFFFFFF:
FFFFFFFFFFFFFFFFFFFFFFFFFFFFFFFFFFFFFFFFFFFFFFFFFFFFFFFFFFFFFFFFFFFFFFF
@A00155:342:HHGFNDSXY:1:1141:30228:33019 1:N:0:GAACCTAG+TCCGCATA
AGGACTCACCTCTGGCCTATGGTCATCTCAATGCCGAGAGGGATGTGAAGGGCGAGAGAGAGCGACTT
CTCTCGGGCCCACAGCCTTACAGCTGTGGAGCACGGTATCCTCTGCCGAAACAGAGGTTTGACAAGAC
+
FFFFFFFFFFFFFFFFFFFFFFFFFFFFFFFFFFFFFFFFFFFFFFFFFFFFFFFFFFFFFFFFFFFFF
FFFFFFFFFFFFFFFFFFFFFFFFFFFFFFFFFFFFFFFFFFFFFFFFFFFFFFFFFFFFFFFFFFFFFFF
@A00155:342:HHGFNDSXY:1:1141:25174:33160 1:N:0:GAACCTAG+TCCGCATA
CCTTACAGCTGTGGAGCACGGTATCCTCTGCCGAAACAGAGGTTTGACAAGACCGGAGGGGTCTCCTA
GTTCAAAGGAGATGTACTCCGGGCTTGTTCACGACCTACCGTGTAAGTCGTAGTCTAGTAGGCTACC
+
FF:FFFFFFFFFFFFFFFFFFFFFFFFFFFFFFFFFFFFFFFFFFFFFFFFFFFFFFFFFFFFFFFFFFFFF
FFFFFFFFFFFFFFFFFFFFFFFFFFFFFFFFFFFFFFFFFFFFFFFFFFFFFFFFFFFFFFFFFFFFFFF: FFFFFFFFFFFFFFFFFFFFFFFFFFFFFFFFFFFFFFFFFFFFFFFFFFFFFFFFFFFFFF
@A00155:342:HHGFNDSXY:1:1141:30047:33927 1:N:0:GAACCTAG+TCCGCATA
AGGACTCACCTCTGGCCTATGGTCATCTCAATGCCGAGAGGGATGTGAAGGGCGAGAGAGAGCGACTT
CTCTCGGGCCCACAGCCTTACAGCTGTGGAGCACGGTATCCTCTGCCGAAACAGAGGTTTGACAAGAC
```

[illegible]

```
@A00155:342:HHGFNDSXY:1:1145:3197:4742 1:N:0:GAACCTAG+TCCGCATA
GACAAGACCGGAGGGGTCTCCTAGTTCCAAAGGAGATGTACTCCGGGCTTGTTACACGACCTACCGTGT
AAGTCGTAGTCTAGTAGGCTACCTGACGAGTCCTTTTTAGGACGAACTTACACA ACTCGAAGAGTAA
+
FFFFFFFF:FFFFFFFFFFFFFFFFFFFFFFFFFFFFFFFFFFFFFFFFFFFFFFFFFFFFFFFFFFFFF
FFFFFFFFFFFFFFFFFFFFFFFFFFFFFFFFFFFFFFFFFFFFFFFFFFFFFFFFFFFFFFFFFFFFFFF
@A00155:342:HHGFNDSXY:1:1145:3106:4773 1:N:0:GAACCTAG+TCCGCATA
GACAAGACCGGAGGGGTCTCCTAGTTCCAAAGGAGATGTACTCCGGGCTTGTTACACGACCTACCGTGT
AAGTCGTAGTCTAGTAGGCTACCTGACGAGTCCTTTTTAGGACGAACTTACACA ACTCGAAGAGTAA
+
FFFFFFFFFFFFFFFFFFFFFFFFFFFFFFFFFFFFFFFFFFFFFFFFFFFFFFFFFFFFFFFFFFFFFFF
FFFFFFFFFFFFFFFFFFFFFFFFFFFFFFFFFFFFFFFFFFFFFFFFFFFFFFFFFFFFFFFFFFFFFFF
@A00155:342:HHGFNDSXY:1:1145:14154:8813 1:N:0:GAACCTAG+TCCGCATA
TTCTCTCGGGCCCACAGCCTTACAGCTGTGGAGCACGGTATCCTCTGCCGAAACAGAGGTTGGACAAG
ACCGGAGGGGTCTCCTAGTTCCAAAGGAGATGTACTCCGGGCTTGTTACACGACCTACCGTGTAAAGTCG
+
FFFFFFFFFFFFFFFFFFFFFFFFFFFFFFFFFFFFFFFFFFFFFFFFFFFFFFFFFFFFFFFFFFFFFFF
FFFFFFFFFFFFFFFFFFFFFFFFFFFFFFFFFFFFFFFFFFFFFFFFFFFFFFFFFFFFFFFFFFFFFFF
@A00155:342:HHGFNDSXY:1:1145:21775:19225 1:N:0:GAACCTAG+TCCGCATA
GAGGGCGAGAGAGAGCGACTTCTCTCGGGCCCACAGCCTTACAGCTGTGGAGCACGGTATCCTCTGCC
GAAACAGAGGTTGGACAAGACCGGAGGGGTCTCCTAGTTCCAAAGGAAATGTACTCCGGGC
+
FFFFFFFFFFFFFFFFFFFFFFFFFFFFFFFFFFFFFFFFFFFFFFFFFFFFFFFFFFFFFFFFFFFFFFF
FFFFFFFFFFFFFFFFFFFFFFFFFFFFFFFFFFFFFFFFFFFFFFFFFFFFFFFFFFFFFFFFFFFFFFF
@A00155:342:HHGFNDSXY:1:1146:16721:4022 1:N:0:GAACCTAG+TCCGCATA
GGATGTGGAGGGCGAGAGAGAGCGACTTCTCTCGGGCCCACAGCCTTACAGCTGTGGAGCACGGTATC
CTCTGCCGAAACAGAGGTTGGACAAGACCGGAGGGGTCTCCTAGTTCCAAAGGAGATGTACTCC
+
FFFFFFFFFFFFFFFFFFFFFFFFFFFFFFFFFFFFFFFFFFFFFFFFFFFFFFFFFFFFFFFFFFFFFFF
FFFFFFFFFFFFFFFFFFFFFFFFFFFFFFFFFFFFFFFFFFFFFFFFFFFFFFFFFFFFFFFFFFFFFFF
@A00155:342:HHGFNDSXY:1:1146:23610:6277 1:N:0:GAACCTAG+TCCGCATA
GGATGTGGAGGGCGAGAGAGAGCGACTTCTCTCGGGCCCACAGCCTTACAGCTGTGGAGCACGGTATC
CTCTGCCGAAACAGAGGTTGGACAAGACCGGAGGGGTCTCCTAGTTCCAAAGGAGATGTACTCC
+
FFFFFFFFFFFFFFFFFFFFFFFFFFFFFFFFFFFFFFFFFFFFFFFFFFFFFFFFFFFFFFFFFFFFFFF
FFFFFFFFFFFFFFFFFFFFFFFFFFFFFFFFFFFFFFFFFFFFFFFFFFFFFFFFFFFFFFFFFFFFFFF
@A00155:342:HHGFNDSXY:1:1146:25229:20478 1:N:0:GAACCTAG+TCCGCATA
AGAGAGAGCGACTTCTCTCGGGCCCACAGCCTTACAGCTGTGGAGCACGGTATCCTCTGCCGAAACAG
AGGTTGGACAAGACCGGAGGGGTCTCCTGGTTCCAAAGGAGATGTACTCCGGGCTTGTTACACGACCTA
+
FFFFFFFFFFFFFFFFFFFFFFFFFFFFFFFFFFFFFFFFFFFFFFFFFFFFFFFFFFFFFFFFFFFFFFF
FFFFFFFFFFFFFFFFFFFFFFFFFFFFFFFFFFFFFFFFFFFFFFFFFFFFFFFFFFFFFFFFFFFFFFF
@A00155:342:HHGFNDSXY:1:1146:29740:31078 1:N:0:GAACCTAG+TCCGCATA
TTACAGCTGTGGAGCACGGTATCCTCTGCCGAAACAGAGGTTGGACAAGACCGGAGGGGTCTCCTAGT
TCCAAAGGAGATGTACTCCGGGCTTGTTACACGACCTACCGTGTAAAGTCGTAGTCTAGTAGGCTACCT
+
FFFFF:FF,FFFFFFFFFFFFFFFF::FFFFFFFF,FFF:FFFFFFFFFFFFFFFF:FFFFFF:FFFF,F
F,FFFFFFFFFFFF:FFF:F,FFFFFF:F,FFFF:FFFF:F:FFFFFF,FF,FFFFFFFF:FFFFFFF
@A00155:342:HHGFNDSXY:1:1146:30508:33974 1:N:0:GAACCTAG+TCCGCATA
GGGCGAGAGAGAGCGACTTCTCTCGGGCCCACAGCCTTACAGCTGTGGAGCACGGTATCCTCTGCCGA
AACAGAGGTTGGACAAGACCGGAGGGGTCTCCTAGTTCCAAAGGAGATGTACTCCGGGCTTGTTACAG
```

@A00155:342:HHGFNDSXY:1:1147:30770:8437 1:N:0:GAACCTAG+TCCGCATA  
CCCCCACACC GCCTTAGATCAGCTGTGTC CACTTAAG GACTCACCTCTGGCCTATGGTCATCTCAAT  
GCCGAGAGGGATGTGGAGGGCGAGAGAGAGCGACTTCTCTCGGGCCCACAGCCTTACAGCTGTGGAGC  
+  
FFFFFFFFFFFFFFF:FFFFFFFFFFFFFFFFFFFFFFFFFFFFFFFFFFFFFFFFFFFFFFFFFFFFFFFFFFFF  
FFFFFFFFFFFFFFFFFFFFFFFFFFFFFFFFFFFFFFFFFFFFFFFFFFFFFFFFFFFFFFFFFFFFFFFFFFFF:  
@A00155:342:HHGFNDSXY:1:1147:30391:27007 1:N:0:GAACCTAG+TCCGCATA  
ACCTCTGTTTCGGCAGAGGATACCGTGCTCCACAGCTGTAAGGCTGTGGGCCCCGAGAGAAGTCGCTCT  
CTCTCGCCCTCCACATCCCTCTCGGCATTGAGATGACCATAGGCCAGAGGAGAGTCCTTAAG  
+  
FFFFFFFFFFFFFFFFFFFFFFFFFFFFFFFFFFFFFFFFFFFFFFFFFFFFFFFFFFFFFFFFFFFFFFFFFFFF  
FFFFFFFFFFFFFFFFFFFFFFFFFFFFFFFFFFFFFFFFFFFFFFFFFFFFFFFFFFFFFFFFFFFFFFFFFFFF,  
@A00155:342:HHGFNDSXY:1:1148:29098:3630 1:N:0:GAACCTAG+TCCGCATA  
AGAGAGAGCGACTTCTCTCGGGCCCACAGCCTTACAGCTGTGGAGCACGGTATCCTCTGCCGAAACAG  
AGGTTGGACAAGACCGGAGGGGTCTCTG GTTCCA AAGGAGATGTACTCCGGGCTTG TTCACGACCTA  
+  
FFFFFFFFFFFFFFFFFFFFFFFFFFFFFFFFFFFFFFFFFFFFFFFFFFFFFFFFFFFFFFFFFFFFFFFFFFFF  
FFFFFFFFFFFFFFFFFFFFFFFFFFFFFFFFFFFFFFFFFFFFFFFFFFFFFFFFFFFFFFFFFFFFFFFFFFFF  
@A00155:342:HHGFNDSXY:1:1148:8947:27038 1:N:0:GAACCTAG+TCCGCATA  
TCCTCTGCCGAAACAGAGGTTGGACAAGACCGGAGGGGTCTCTG GTTCCA AAGGAGATGTACTCCGG  
GCTTG TTCACGACCTACCGTGTAAGTCGTAGTCTAGTAGGCTACCTGACGAGTCCTTTTTAGGACGAA  
+  
FFFFFFFFFFFFFFFFFFFFFFFFFFFFFFFFFFFFFFFFFFFFFFFFFFFFFFFFFFFFFFFFFFFFFFFFFFFF  
FF, FFFFFFFFF:FFFFFFFFFFFFFFFFFFFFFFFFFFFFFFFFFFFFFFFFFFFFFFFFFFFFFFFFFFFF  
@A00155:342:HHGFNDSXY:1:1148:6542:28260 1:N:0:GAACCTAG+TCCGCATA  
GGGCGAGAGAGAGCGACTTCTCTCGGGCCCACAGCCTTACAGCTGTGGAGCACGGTATCCTCTGCCGA  
AACAGAGGTTGGACAAAACCGGAGGGGTCTCTAGTTCCA AAGGAGATGTACTCCGGGCTTG TTCACG  
+  
FFFFFFFFFFFFFFFFFFFFFFFFFFFFFFFFFFFFFFFFFFFFFFFFFFFFFFFFFFFFFFFFFFFFFFFFFFFF  
FFF, FFFFFFFFF:FFFFFFFFFFFFFFFFFFFFFFFFFFFFFFFFFFFFFFFFFFFFFFFFFFFFFFFFFFFF  
@A00155:342:HHGFNDSXY:1:1149:27398:2347 1:N:0:GAACCTAG+TCCGCATA  
ATGCCGAGAGGGATGTGGAGGGCGAGAGAGAGCGACTTCTCTCGGGCCCACAGCCTTACAGCTGTGGA  
GCACGGTATCCTCTGCCGAAACAGAGGTTGGACAAGACCGGAGGGGTCTCTG GTTCCA AAGGAGATG  
+  
FFFFFFFFFFFFFFF:FFFFFFFFFFFFFFFFFFFFFFFFFFFFFFFFFFFFFFFFFFFFFFFFFFFFFFFFFFFF  
FFFFFFFFFFFFFFFFFFFFFFFFFFFFFFFFFFFFFFFFFFFFFFFFFFFFFFFFFFFFFFFFFFFFFFFFFFFF  
@A00155:342:HHGFNDSXY:1:1149:24044:19617 1:N:0:GAACCTAG+TCCGCATA  
CTTCTCTCGGGCCCACAGCCTTACAGCTGTGGAGCACGGTATCCTCTGCCGAAACAGAGGTTGGACAA  
GACCGGAGGGGTCTCTAGTTCCA AAGGAGATGTACTCCGGGCTTG TTCACGACCTACCGTGTAAGTC  
+  
FFFFFFFFFFFFFFFFFFFFFFFFFFFFFFFFFFFFFFFFFFFFFFFFFFFFFFFFFFFFFFFFFFFFFFFFFFFF  
F:FFFFFFFFFFFFFFFFFFFFFFFFFFFFFFFFFFFFFFFFFFFFFFFFFFFFFFFFFFFFFFFFFFFFFFFFFFFF  
@A00155:342:HHGFNDSXY:1:1149:28980:26725 1:N:0:GAACCTAG+TCCGCATA  
CAGCCTTACAGCTGTGGAGCACGGTATCCTCTGCCGAAACAGAGGTTGGACAAGACCGGAGGGGTCTC  
CTAGTTCCA AAGGAGATGTACTCCGGGCTTG TTCACGACCTACCGTGTAAGTCGTAGTCTAGTAGGCT  
+  
FFFFFFFFFFFFFFFFFFFFFFFFFFFFFFFFFFFFFFFFFFFFFFFFFFFFFFFFFFFFFFFFFFFFFFFFFFFF  
FFFFFFFFFFFFFFFFFFFFFFFF, FF, FFFFFFFFFFFFFFFFFFFFFFFFFFFFFFFFFFFFFF: FF, FFI

[illegible]

[illegible]

[illegible]

@A00155:342:HHGFNDSXY:1:1156:13774:12446 1:N:0:GAACCTAG+TCCGCATA  
AATGCCGAGAGGGATGTGGAGGGCGAGAGAGAGCGACTTCTCTCGGGCCACAGCCTTACAGCTGTGG  
AGCACGGTATCCTCTGCCGAAACAGAGGTTGGACAAGACCGGAGGGGTCTCCTAGTTCCAAAGGAGAT  
+  
FFFFFFFFFFFFFF:FFFFFFFFFFFFFF:FFFFFFFFFFFFFF:FFFFFFFFFFFFFF  
FFFFFFFFFFFFFF:FFFFF,FFFFFFFFFFFFFF  
@A00155:342:HHGFNDSXY:1:1156:16866:20995 1:N:0:GAACCTAG+TCCGCATA  
ATCTCAATGCCGAGAGGGATGTGGAGGGCGAGAGAGAGCGACTTCTCTCGGGCCACAGCCTTACAGC  
TGTGGAGCACGGTATCCTCTGCCGAAACAGAGGTTGGACAAGACCGGAGGGGTCTCCTAGTTCCAAAG  
+  
FFFFFFFFFFFFFF:FFFFFFFFFFFFFF:FFFFFFFFFFFFFF:FFFFFFFFFFFFFF  
FFFFFFFFFFFFFF:FFFFFFFFFFFFFF:FFFFFFFFFFFFFF:FFFFFFFFFFFFFF  
@A00155:342:HHGFNDSXY:1:1156:11098:32894 1:N:0:GAACCTAG+TCCGCATA  
TGCCGAGAGGGATGTGGAGGGCGAGAGAGAGCGACTTCTCTCGGGCCACAGCCTTACAGCTGTGGAG  
CACGGTATCCTCTGCCGAAACAGAGGTTGGACAAGACCGGAGGGGTCTCCCAGTTCCAAAGGAGATGT  
+  
FFFFFFFFFFFF:FFFFFFFFFFFFFF:FFFFFFFFFFFFFF,FFFFFFFFFFFF  
FFFFFFFFFFFFFF:FFFFFFFFFFFFFF:FFFFFFFFFFFFFF:FFFFFFFFFFFFFF  
@A00155:342:HHGFNDSXY:1:1156:10538:34366 1:N:0:GAACCTAG+TCCGCATA  
GCGAGAGAGAGCGACTTCTCTCGGGCCACAGCCTTACAGCTGTGGAGCACGGTATCCTCTGCCGAA  
CAGAGGTTGGACAAGACCGGAGGGGTCTCCTAGTTCCAAAGGAGATGTACTCCGGGCTTGTTACGAC  
+  
FFFFFFFFFFFFFF:FFFFFFFFFFFFFF:FFFFFFFFFFFFFF:FFFFFFFFFFFFFF  
FFFFFFFFFFFFFF:FFFF:FFFFFFFFFFFFFF:FFFFFFFFFFFFFF  
@A00155:342:HHGFNDSXY:1:1157:5077:3396 1:N:0:GAACCTAG+TCCGCATA  
TCCACTTAAGGACTCACCTCTGGCCTATGGTCATCTCAATGCCGAGAGGGATGTGAAGGGCGAGAGAG  
AGCGACTTCTCTCGGGCCACAGCCTTACAGCTGTGGAGCACGGTATCCTCTGCCGAAACAGAGGTTG  
+  
FFFFFFFFFFFFFF,FFFFFFFFFFFFFF:FFFFFFFFFFFFFF:FFFFFFFFFFFFFF  
FFFFFFFFFFFFFF:FFFFFFFFFFFFFF:FFFFFFFFFFFFFF:FFFFFFFFFFFFFF  
@A00155:342:HHGFNDSXY:1:1157:32054:7717 1:N:0:GAACCTAG+TCCGCATA  
CTGGCCTATGGTCATCTCAATGCCGAGAGGGATGTGGAGGGCGAGAGAGAGCGACTTCTCTCGGGCC  
ACAGCCTTACAGCTGTGGAGCACGGTATCCTCTGCCGAAACAGAGGTTGGACAAGACCGGAGGGGTCT  
+  
FFFFFFFFFFFF:FFFFFFFFFFFFFF:FFFFFFFFFFFFFF:FFFFFFFFFFFFFF  
FFFFFFF:FFFFFFFFFFFFFF:FFFFFFFFFFFFFF:FFFFFFFFFFFFFF  
@A00155:342:HHGFNDSXY:1:1157:21757:19914 1:N:0:GAACCTAG+TCCGCATA  
ACTTCTCTCGGGCCACAGCCTTACAGCTGTGGAGCACGGTATCCTCTGCCGAAACAGAGGTTGGACA  
AGACCGGAGGGGTCTCCTAGTTCCAAAGGAGATGTACTCCGGGCTTGTTACGACCTACCGTGTAAGT  
+  
FFFFFFFFFFFFFF:FFFFFFFFFFFFFF:FFFFFFFFFFFFFF:FFFFFFFFFFFFFF  
FFFFFFFFFFFFFF:FFFFFFFFFFFFFF:FFFFFFFFFFFFFF:FFFFFFFFFFFFFF  
@A00155:342:HHGFNDSXY:1:1158:24569:10254 1:N:0:GAACCTAG+TCCGCATA  
TGTCCACTTAAGGACTCACCTCTGGCCTATGGTCATCTCAATGCCGAGAGGGATGTGGAGGGCGAGAG  
AGAGCGACTTCTCTCGGGCCACAGCCTTACAGCTGTGGAGCACGGTATCCTCTGCCGAAACAGAGGT  
+  
FFFFFFFFFFFFFF:FFFFFFFFFFFFFF:FFFFFFFFFFFFFF:FFFFFFFFFFFFFF  
FFFFFFF:FFFFFFFFFFFFFF:FFFFFFFFFFFFFF:FFFFFFFFFFFFFF  
@A00155:342:HHGFNDSXY:1:1158:7410:14168 1:N:0:GAACCTAG+TCCGCATA  
GGATGTAGAGGGCGAGAGAGAGCGACTTCTCTCGGGCCACAGCCTTACAGCTGTGGAGCACGGTATC  
CTCTGCCGAAACAGAGGTTGGACAAGACCGGAGGGGTCTCCTAGTTCCAAAGGAGATGTACTCC  
+  
FFFFFFFFFFFFFF:FFFFFFFFFFFFFF:FFFFFFFFFFFFFF:FFFFFFFFFFFFFF  
FFFFFFFFFFFFFF:FFFFFFFFFFFFFF:FFFFFFFFFFFFFF:FFFFFFFFFFFFFF



[illegible]

[illegible]

@A00155:342:HHGFNDSXY:1:1166:22571:19664 1:N:0:GAACCTAG+TCCGCATA  
CAATGCCGAGAGGGATGTGGAGGGCGAGAGAGAGCGACTTCTCTCGGGCCCCACAGCCTTACAGCTGTG  
GAGCACGGTATCCTCTGCCGAAACAGAGGTTGGACAAGACCGGAGGGGTCTCCTAGTTCCAAAGGAGA  
+  
FFFFFFFFFFFFFFFF:FFFFFFFFFFFFFFFFFFFFFFFFFFFFFFFFFFFFFFFFFFFFFFFFFFFFFFFFFFFFF  
FFFFFFFFFFFFFFFFFFFFFFFFFFFFFFFFFFFFFFFFFFFFFFFFFFFFFFFFFFFFFFFFFFFFFFFFFFFFFFF  
@A00155:342:HHGFNDSXY:1:1166:12852:30890 1:N:0:GAACCTAG+TCCGCATA  
AGGGCGAGAGAGAGCGACTTCTCTCGGGCCCCACAGCCTTACAGCTGTGGAGCACGGTATCCTCTGCCG  
AAACAGAGGTTGGACAAGACCGGAGGGGTCTCCTGGTTCCAAAGGAGATGTACTCCGGGCTTGTTTAC  
+  
FF:F,FFFFFFFFFFFF:,FFFFFF,F:FFF::,FFFFFFFFFFFF:F:FFFFFFFF:FFFF:FFF:FFF  
FFFFFFFF:F,FFFFFFFFFFFF:FFFF,FFFFFF::FFFF,FFFFFFFFFFFF,,:F:,FFFFFFFF  
@A00155:342:HHGFNDSXY:1:1166:13937:33207 1:N:0:GAACCTAG+TCCGCATA  
AGGGCGAGAGAGAGCGACTTCTCTCGGGCCCCACAGCCTTACAGCTGTGGAGCACGGTATCCTCTGCCG  
AAACAGAGGTTGGACAAGACCGGAGGGGTCTCCTGGTTCCAAAGGAGATGTACTCCGGGCTTGTTTAC  
+  
FFFFFFFFFFFFFFFFFFFFFFFFFFFFFFFFFFFFFFFFFFFFFFFFFFFFFFFFFFFFFFFFFFFFFFFFFFFFF  
FFFFFFFFFFFFFFFFFFFFFFFFFFFFFFFFFFFFFFFFFFFFFFFFFFFFFFFFFFFFFFFFFFFFFFFFFFFFF  
@A00155:342:HHGFNDSXY:1:1167:3188:1282 1:N:0:GAACCTAG+TCCGCATA  
CACAGCTTTACAGCTGTGGAGCACGGTATCCTCTGCCGAAACAGAGGTTGGACAAGACCGGAGGGGTCT  
CCTAGTTCCAAAGGAGATGTACTCCGGGCTTGTTTACGACCTACCGTGTAAAGTCGTAGTCTAGTAGG  
+  
FFFFFFFFFFFFFFFFFFFFFFFFFFFF,FFF,FFFFFFFFFFFFFFFFFFFFFFFFFFFFFFFFFFFFFFFFFFFFF  
FFFFFFFFFFFFFFFFFFFFFFFFFFFFFFFFFFFFFFFFFFFFFFFFFFFFFFFFFFFFFFFFFFFFFFFFFFFFF  
@A00155:342:HHGFNDSXY:1:1167:17445:3803 1:N:0:GAACCTAG+TCCGCATA  
AGGGCGAGAGAGAGCGACTTCTCTCGGGCCCCACAGCCTTACAGCTGTGGAGCACGGTATCCTCTGCCG  
AAACAGAGGTTGGACAAGACCGGAGGGGTCTCCTAGTTCCAAAGGAGATGTACTCCGGGCTTGTTTAC  
+  
FFFFFFFFFFFF:FFFFFFFFFFFFFFFFFFFFFFFFFFFFFFFFFFFFFFFFFFFFFFFFFFFFFFFFFFFFF  
FFFFFFFFFFFFFFFFFFFFFFFFFFFFFFFFFFFFFFFFFFFFFFFFFFFFFFFFFFFFFFFFFFFFFFFFFFFFF  
@A00155:342:HHGFNDSXY:1:1167:15031:11835 1:N:0:GAACCTAG+TCCGCATA  
ATCTCAATGCCGAGAGGGATGTAGAGGGCGAGAGAGAGCGACTTCTCTCGGGCCCCACAGCCTTACAGC  
TGTGGAGCACGGTATCCTCTGCCGAAACAGAGGTTGGACAAGACCGGAGGGGTCTCCTAGTTCCAAAG  
+  
FFFFFFFFFFFFFFFFFFFFFFFFFFFFFFFFFFFFFFFFFFFFFFFFFFFFFFFFFFFFFFFFFFFFFFFFFFFFF  
FFFFFFFFFFFFFFFFFFFFFFFFFFFFFFFFFFFFFFFFFFFFFFFFFFFFFFFFFFFFFFFFFFFFFFFFFFFFF  
@A00155:342:HHGFNDSXY:1:1167:20546:14998 1:N:0:GAACCTAG+TCCGCATA  
GAGAGCGACTTCTCTCGGGCCCCACAGCCTTACAGCTGTGGAGCACGGTATCCTCTGCCGAAACAGAGG  
TTGGACAAGACCAGAGGGGTCTCCTAGTTCCAAAGGAGATGTACTCCGGGCTTGTTTACGACCTACCG  
+  
FFFFFFFFFFFFFFFFFFFFFFFFFFFFFFFFFFFFFFFFFFFFFFFFFFFFFFFFFFFFFFFFFFFFFFFFFFFFF  
FFFFFFFFFFFFFFFFFFFFFFFFFFFFFFFFFFFFFFFFFFFFFFFFFFFFFFFFFFFFFFFFFFFFFFFFFFFFF  
@A00155:342:HHGFNDSXY:1:1167:14687:18474 1:N:0:GAACCTAG+TCCGCATA  
TTCTCTCGGGCCCCACAGCCTTACAGCTGTGGAGCACGGTATCCTCTGCCGAAACAGAGGTTGGACAAG  
ACCGGAGGGGTCTCCTAGTTCCAAAGGAGATGTACTCCGGGCTTGTTTACGACCTACCGTGTAAAGTCG  
+  
FFFFFFFFFFFFFFFFFFFF:FFFFFFFFFFFFFFFFFFFFFFFFFFFFFFFFFFFFFFFFFFFFFFFFFFFFFFFFFFFFF  
FFFFFFFFFFFFFFFFFFFFFFFFFFFFFFFFFFFFFFFFFFFFFFFFFFFFFFFFFFFFFFFFFFFFFFFFFFFFF,  
@A00155:342:HHGFNDSXY:1:1167:21088:24017 1:N:0:GAACCTAG+TCCGCATA  
AGAGAGAGCGACTTCTCTCGGGCCCCACAGCCTTACAGCTGTGGAGCACGGTATCCTCTGCCGAAACAG  
AGGTTGGACAAGACCGGAGGGGTCTCCTAGTTCCAAAGGAGATGTACTCCGGGCTTGTTTACGACCTA  
+  
FFFFFFFFFFFFFFFFFFFFFFFFFFFFFFFFFFFFFFFFFFFFFFFFFFFFFFFFFFFFFFFFFFFFFFFFFFFFF  
FFFFFFFFFFFFFFFFFFFFFFFFFFFFFFFFFFFFFFFFFFFFFFFFFFFFFFFFFFFFFFFFFFFFFFFFFFFFF,  
@A00155:342:HHGFNDSXY:1:1167:21088:24017 1:N:0:GAACCTAG+TCCGCATA  
AGAGAGAGCGACTTCTCTCGGGCCCCACAGCCTTACAGCTGTGGAGCACGGTATCCTCTGCCGAAACAG  
AGGTTGGACAAGACCGGAGGGGTCTCCTAGTTCCAAAGGAGATGTACTCCGGGCTTGTTTACGACCTA  
+  
FFFFFFFFFFFFFFFFFFFFFFFFFFFFFFFFFFFFFFFFFFFFFFFFFFFFFFFFFFFFFFFFFFFFFFFFFFFFF  
FFFFFFFFFFFFFFFFFFFFFFFFFFFFFFFFFFFFFFFFFFFFFFFFFFFFFFFFFFFFFFFFFFFFFFFFFFFFF,  
@A00155:342:HHGFNDSXY:1:1167:21088:24017 1:N:0:GAACCTAG+TCCGCATA  
AGAGAGAGCGACTTCTCTCGGGCCCCACAGCCTTACAGCTGTGGAGCACGGTATCCTCTGCCGAAACAG  
AGGTTGGACAAGACCGGAGGGGTCTCCTAGTTCCAAAGGAGATGTACTCCGGGCTTGTTTACGACCTA

```
@A00155:342:HHGFNDSXY:1:1167:8829:24111 1:N:0:GAACCTAG+TCCGCATA
GAGAGGGATGTGGAGGGCGAGAGAGAGCGACTTCTCTCGGGCCACAGCCTTACAGCTGTGGAGCACG
GTATCCTCTGCCGAAACAGAGGTTGGACAAGACCGGAGGGGTCTCCTAGTTCCAAAGGAGATGTACTC
+
FFFFFFFFFFFFFFFFFFFFFFFFFFFFFFFFFFFFFFFFFFFFFFFFFFFFFFFFFFFFFFFFFFFFFFFFFFFF
FFFFFFFFFFFFFFFFFFFFFFFFFFFFFFFFFFFFFFFFFFFFFFFFFFFFFFFFFFFFFFFFFFFFFFFFFFFF
@A00155:342:HHGFNDSXY:1:1167:18105:26647 1:N:0:GAACCTAG+TCCGCATA
AGCTGTGTCCACTTAAGGACTCACCTCTGGCCTATGGTCATCTCAATGCCGAGAGGGATGTGAAGGGC
GAGAGAGAGCGACTTCTCTCGGGCCACAGCCTTACAGCTGTGGAGCACGGTATCCTCTGCCGAAAC
+
FFF:FFFFFFFFFFFF,FFFFFFFFFFFFFFFFFFFF:FFF,FFFFFFFFFFFF:FFFF:FFFF:FFFFFFFFFFFF
FFFFFFFFFFFFFFFFFFFFFFFFFFFFFFFFFFFFFFFFFFFFFFFFFFFFFFFFFFFFFFFFFFFFFFFFFFFF
@A00155:342:HHGFNDSXY:1:1167:20094:32534 1:N:0:GAACCTAG+TCCGCATA
AGAGAGAGCGACTTCTCTCGGGCCACAGCCTTACAGCTGTGGAGCACGGTATCCTCTGCCGAAACAG
AGGTTGGACAAGACCGGAGGGGTCTCCTAGTTCCAAAGGAGATGTACTCCGGGCTTGTTACGACCTA
+
FFFFFFFFFFFFFFFFFFFFFFFFFFFFFFFFFFFFFFFFFFFFFFFFFFFFFFFFFFFFFFFFFFFFFFFFFFFF:FFFFFFF
FFFFFFFFFFFF:FFFFFFFFFFFFFFFFFFFFFFFFFFFFFFFFFFFFFFFFFFFFFFFFFFFFFFFFFFFFF
@A00155:342:HHGFNDSXY:1:1167:17824:35462 1:N:0:GAACCTAG+TCCGCATA
TTACAGCTGTGGAGCACGGTATCCTCTGCCGAAACAGAGGTTGGACAAGACCGGAGGGGTCTCCTAGT
TCCAAAGGAGATGTACTCCGGGCTTGTTACGACCTACCGTGTAAGTCGTAGTCTAGTAGGCTACCTG
+
FFFFFFFFFFFFFFFFFFFFFFFFFFFF:FFFFFFFFFFFFFFFFFFFFFFFFFFFFFFFFFFFFFFFFFFFFF
FFFFFFFFFFFFFFFFFFFFFFFFFFFF:FF:FFFFFFFFFFFFFFFFFFFFFFFFFFFFFFFFFFFFFFFFFFFF:FF:F
@A00155:342:HHGFNDSXY:1:1168:18539:8015 1:N:0:GAACCTAG+TCCGCATA
TATCCTCTGCCGAAACAGAGGTTGGACAAGACCGGAGGGGTCTCCTAGTTCCAAAGGAGATGTACTCC
GGGCTTGTTACGACCTACCGTGTAAGTCGTAGTCTAGTAGGCTACCTGACGAGTCCTTTTAGGACG
+
FFFFFFFFFFFFFFFFFFFFFFFFFFFFFFFFFFFFFFFFFFFFFFFFFFFFFFFFFFFFFFFFFFFFFFFFFFFF
FFFFFFFFFFFFFFFFFFFFFFFFFFFF:FFFFFFFFFFFFFFFFFFFFFFFFFFFFFFFFFFFFFFFFFFFFF:FFFFF
@A00155:342:HHGFNDSXY:1:1168:29912:12524 1:N:0:GAACCTAG+TCCGCATA
ACCTCTGTTTCGGCAGAGGATACCGTGCTCCACAGCTGTAAGGCTGTGGGCCCGAGAGAAGTCGCTCT
CTCTCGCCCTCCACATCCCTCTCGGCATTGAGATGACCATAGGCCAGAGGAGAGTCCTTAAGTGGACA
+
FFFFFFFFFFFFFFFFFFFFFFFFFFFFFFFFFFFFFFFFFFFFFFFFFFFFFFFFFFFFFFFFFFFFFFFFFFFF:FFFFFFFFFFFFFFFFFFFFFFFFFFFFF
FFFFFFFFFFFFFFFFFFFFFFFFFFFF:FFFFFFFFFFFFFFFFFFFFFFFFFFFFFFFFFFFFFFFFFFFFF:FFFFF
@A00155:342:HHGFNDSXY:1:1169:26657:1689 1:N:0:GAACCTAG+TCCGCATA
CTCAATGCCGAGAGGGATGTGGAGGGCGAGAGAGAGCGACTTCTCTCGGGCCACAGCCTTACAGCTG
TGGAGCACGGTATCCTCTGCCGAAACAGAGGTTGGACAAGACCGGAGGGGTCTCCTGGTTCCAAAGGA
+
FFFFFFFFFFFFFFFFFFFFFFFFFFFF:FFFFFFFFFFFFFFFFFFFFFFFFFFFFFFFFFFFFFFFFFFFF,FFFFFF:F
:FFFFFFFFFFFFFFFFFFFFFFFFFFFFFFFFFFFFFFFFFFFF:FFFFFFFFFFFFFFFFFFFFFFFFFFFFF
@A00155:342:HHGFNDSXY:1:1169:29794:9032 1:N:0:GAACCTAG+TCCGCATA
GGCAGAGGATACCGTGCTCCACAGCTGTAAGGCTGTGGGCCCGAGAGAAGTCGCTCTCTCGCCCTC
CACATCCCTCTCGGCATTGAGATGACCATAGGCCAGAGGTGAGTCCTTAAGTGGACA
+
FFFFFFFFFFFFFFFFFFFF:FFFFFFFFFFFFF:FFFF:FFFFFFFFFFFFFFFFFFFF:FFFFFFFFFFFFFFFFFFFF
FFFF,FFFF:FF:FF,:FFFF:FFFFFFFFFFFFFFFFFFFFFFFFFFFF,FFF::FFFF:
@A00155:342:HHGFNDSXY:1:1169:3441:15655 1:N:0:GAACCTAG+TCCGCATA
TAAGTGGACACAGCTGATCTAAGGCGGTGTGGCGGGGCATGGGTTTGAACCCCATGACGGTCGGAGT
CTAGTAGGCTCCCTGATGAGTCCGTTCCAAGGACGACACCGTCGTTACTCTTCGAGTTGTGTAAGTTT
+
FFFFFFFFFFFFFFFFFFFFFFFFFFFFFFFFFFFFFFFFFFFFFFFFFFFFFFFFFFFFFFFFFFFFFFFFFFFF
FFFFFFFFFFFFFFFFFFFFFFFFFFFF,FFFFFFFFFFFFFFFFFFFFFFFFFFFFFFFFFFFFFFFFFFFFF
```

@A00155:342:HHGFNDSXY:1:1170:15691:1611 1:N:0:GAACCTAG+TCCGCATA  
CTTCTCTCGGGCCCACAGCCTTACAGCTGTGGAGCACGGTATCCTCTGCCGAAACAGAGGTTGGACAA  
GACCGGAGGGGTCTCCTAGTTCCAAAGGAGATGTACTCCGGGCTTGTTACGACCTACCGTGTAAG  
+  
FFFFFFFFFFFFFFFFFFFFFFFF:FFFFFFFFFFFFFFFFFFFFFFFFFFFFFFFFFFFFFFFFFFFFFFFF  
FFFFFFFFFFFFFFFFFFFFFFFFFFFFFFFFFFFFFFFFFFFFFFFFFFFFFFFFFFFFFFFFFFFFFFFF:FFFFF  
@A00155:342:HHGFNDSXY:1:1170:19985:13088 1:N:0:GAACCTAG+TCCGCATA  
AAAGACTCACCTCTGGCCTATGGTCATCTCAATGCCGAGAGGGATGTGGAGGGCGAGAGAGCGACT  
TCTCTCGGGCCCACAGCCTTACAGCTGTGGAGCACGGTATCCTCTGCCGAAACAGAGGTTGGACAAGA  
+  
FFFFFFFFFFFFFFFFFFFFFFFFFFFFFFFFFFFFFFFFFFFFFFFFFFFFFFFFFFFFFFFFFFFFFFFF  
FFFFFFFFFFFFFFFFFFFFFFFFFFFFFFFFFFFFFFFFFFFFFFFFFFFFFFFFFFFFFFFFFFFFFFFF:FFFFF:F  
@A00155:342:HHGFNDSXY:1:1170:2474:13730 1:N:0:GAACCTAG+TCCGCATA  
ACCTCTGTTTCGGCAGAGGATACCGTGCTCCACAGCTGTAAGGCTGTGGGCCCGAGAGAAAGTCGCTCT  
CTCTCGCCCTCCACATCCCTCTCGGCATTGAGATGACCATAGGCCAGAGGTGAGTCCTTAAGTGGACA  
+  
FFFFFFFFFFFFFFFFFFFFFFFFFFFFFFFFFFFFFFFFFFFFFFFFFFFFFFFFFFFFFFFFFFFFFFFF  
FFFFFFFFFFFFFFFFFFFFFFFFFFFFFFFFFFFFFFFFFFFFFFFFFFFFFFFFFFFFFFFFFFFFFFFF:FFFFF:F  
@A00155:342:HHGFNDSXY:1:1170:29478:22263 1:N:0:GAACCTAG+TCCGCATA  
GAGCGACTTCTCTCGGGCCCACAGCCTTACAGCTGTGGAGCACGGTATCCTCTGCCGAAACAGAGGTT  
GGACAAGACCGGAGGGGTCTCCTAGTTCCAAAGGAGATGTACTCCGGGCTTGTTACGACCTACCGTG  
+  
FFFFFFFFFFFFFFFFFFFFFFFFFFFFFFFFFFFFFFFFFFFFFFFFFFFFFFFFFFFFFFFFFFFFFFFF  
FFFFFFFFFFFFFFFFFFFFFFFFFFFFFFFFFFFFFFFFFFFFFFFFFFFFFFFFFFFFFFFFFFFFFFFF:FFFFF:F  
@A00155:342:HHGFNDSXY:1:1171:29378:10191 1:N:0:GAACCTAG+TCCGCATA  
AAGGACTCACCTCTGGCCTATGGTCATCTCAATGCCGAGAGGGATGTGAAGGGCGAGAGAGCGACT  
TCTCTCGGGCCCACAGCCTTACAGCTGTGGAGCACGGTATCCTCTGCCGAAACAGAGGTTGGACAAGA  
+  
FFFFFFFFFFFFFFFFFFFFFFFFFFFFFFFFFFFFFFFFFFFFFFFFFFFFFFFFFFFFFFFFFFFFFFFF  
FFFFFFFFFFFFFFFFFFFFFFFFFFFFFFFFFFFFFFFFFFFFFFFFFFFFFFFFFFFFFFFFFFFFFFFF:FFFFF:F  
@A00155:342:HHGFNDSXY:1:1171:31738:16626 1:N:0:GAACCTAG+TCCGCATA  
AAAGAGAGCGACTTCTCTCGGGCCCACAGCCTTACAGCTGTGGAGCACGGTATCCTCTGCCGAAACAG  
AGGTTGGACAAGACCGGAGGGGTCTCCTAGTTCCAAAGGAGATGTACTCCGGGCTTGTTACGACCTA  
+  
FFFFFFFFFFFFFFFFFFFFFFFFFFFFFFFFFFFFFFFFFFFFFFFFFFFFFFFFFFFFFFFFFFFFFFFF  
FFFFFFFFFFFFFFFFFFFFFFFFFFFFFFFFFFFFFFFFFFFFFFFFFFFFFFFFFFFFFFFFFFFFFFFF:FFFFF:F  
@A00155:342:HHGFNDSXY:1:1171:30761:21950 1:N:0:GAACCTAG+TCCGCATA  
CTTCTCTCGGGCCCACAGCCTTACAGCTGTGGAGCACGGTATCCTCTGCCGAAACAGAGGTTGGACAA  
GACCGGAGGGGTCTCCTAGTTCCAAAGGAGATGTACTCCGGGCTTGTTACGACCTACCGTGTAAGTC  
+  
FFFFFFFFFFFFFFFFFFFFFFFFFFFFFFFFFFFFFFFFFFFFFFFFFFFFFFFFFFFFFFFFFFFFFFFF  
FFFFFFFFFFFFFFFFFFFFFFFFFFFFFFFFFFFFFFFFFFFFFFFFFFFFFFFFFFFFFFFFFFFFFFFF:FFFFF:F  
@A00155:342:HHGFNDSXY:1:1172:27850:6261 1:N:0:GAACCTAG+TCCGCATA  
TATCCTCTGCCGAAACAGAGGTTGGACAAGACCGGAGGGGTCTCCTGGTTCCAAAGGAGATGTACTCC  
GGGCTTGTTACGACCTACCGTGTAAGTCGTAGTCTAGTAGGCTACCTGACGAGTCCTTTTAGGACG  
+  
FFFFFFFFFFFFFFFFFFFFFFFFFFFFFFFFFFFFFFFFFFFFFFFFFFFFFFFFFFFFFFFFFFFFFFFF  
FFFFFFFFFFFFFFFFFFFFFFFFFFFFFFFFFFFFFFFFFFFFFFFFFFFFFFFFFFFFFFFFFFFFFFFF:FFF:FFFFFFFF  
@A00155:342:HHGFNDSXY:1:1172:22164:23563 1:N:0:GAACCTAG+TCCGCATA  
TATCCTCTGCCGAAACAGAGGTTGGACAAGACCGGAGGGGTCTCCTAGTTCCAAAGGAGATGTACTCC  
GGGCTTGTTACGACCTACCGTGTAAGTCGTAGTCTAGTAGGCTACCTGACGAGTCCTTTTAGGACG  
+  
FFFFFFFFFFFFFFFFFFFFFFFFFFFFFFFFFFFFFFFFFFFFFFFFFFFFFFFFFFFFFFFFFFFFFFFF  
FFFFFFFFFFFFFFFFFFFFFFFFFFFFFFFFFFFFFFFFFFFFFFFFFFFFFFFFFFFFFFFFFFFFFFFF:FFFFF  
FFFFFFFFFFFFFFFFFFFFFFFF:FFFFF:FFFFFFFFFFFFFFFFFFFFFFFFFFFFFFFFFFFFFFFF

@A00155:342:HHGFNDSXY:1:1173:12066:3599 1:N:0:GAACCTAG+TCCGCATA  
CCTTACAGCTGTGGAGCACGGTATCCTCTGCCGAAACAGAGGTTGGACAAGACCGGAGGGGTCTCCTG  
GTTCCAAAGGAGATGTACTCCGGGCTTGTTCACGACCTACCGTGTAAGTCGTAGTCTAGTAGGCTACC  
+  
FFFFFFFFFFFFFFFFFFFFFFFFFFFFFFFFFFFFFFFFFFFFFFFFFFFFFFFFFFFFFFFFFFFFFFFFFFFF  
FFFFFFFFFFFFFFFFFFFFFFFFFFFFFFFFFFFFFFFFFFFFFFFFFFFFFFFFFFFFFFFFFFFFFFFFFFFF  
@A00155:342:HHGFNDSXY:1:1173:11207:6558 1:N:0:GAACCTAG+TCCGCATA  
GTCCACTTAAGGACTCACCTCTGGCCTATGGTCATCTCAATGCCGAGAGGGATGTGGAGGGCGAGAGA  
GAGCGACTTCTCTCGGGCCACAGCCTTACAGCTGTGGAGCACGGTATCCTCTGCCGAAACAGAGGTT  
+  
FFFFFFFFFFFFFFFFFFFFFFFFFFFFFFFFFFFFFFFFFFFFFFFFFFFFFFFFFFFFFFFFFFFFFFFFFFFF  
FFFFFFFFFFFFFFFFFFFFFFFFFFFFFFFFFFFFFFFFFFFFFFFFFFFFFFFFFFFFFFFFFFFFFFFFFFFF  
@A00155:342:HHGFNDSXY:1:1173:29975:11945 1:N:0:GAACCTAG+TCCGCATA  
GTATCCTCTGCCGAAACAGAGGTTGGACAAGACCGGAGGGGTCTCCTAGTTCCAAAGGAGATGTACTC  
CGGGCTTGTTCACGACCTACCGTGTAAGTCGTAGTCTAGTAGGCTACCTGACGAGTCCTTTTAGGAC  
+  
FFFFFFFFFFFFFFFFFFFFFFFFFFFFFFFFFFFFFFFFFFFFFFFFFFFFFFFFFFFFFFFFFFFFFFFFFFFF  
FFFFFFFFFFFFFFFFFFFFFFFFFFFFFFFFFFFFFFFFFFFFFFFFFFFFFFFFFFFFFFFFFFFFFFFFFFFF  
@A00155:342:HHGFNDSXY:1:1173:8314:15264 1:N:0:GAACCTAG+TCCGCATA  
GGATGTGGAGGGCGAGAGAGAGCGACTTCTCTCGGGCCACAGCCTTACAGCTGTGGAGCACGGTATC  
CTCTGCCGAAACAGAGGTTGGACAAGACCGGAGGGGTCTCCTAGTTCCAAAGGAGATGTACTCC  
+  
FFFFFFFFFFFFFFFFFFFFFFFFFFFFFFFFFFFFFFFFFFFFFFFFFFFFFFFFFFFFFFFFFFFFFFFFFFFF  
FFFFFFFFFFFFFFFFFFFFFFFFFFFFFFFFFFFFFFFFFFFFFFFFFFFFFFFFFFFFFFFFFFFFFFFFFFFF  
@A00155:342:HHGFNDSXY:1:1173:16830:16892 1:N:0:GAACCTAG+TCCGCATA  
CTTCTCTCGGGCCACAGCCTTACAGCTGTGGAGCACGGTATCCTCTGCCGAAACAGAGGTTGGACAA  
GACCGGAGGGGTCTCCTAGTTCCAAAGGAGATGTACTCCGGGCTTGTTCACGACCTACCGTGTAAGTC  
+  
FFFFFFFFFFFFFFFFFFFFFFFFFFFFFFFFFFFFFFFFFFFFFFFFFFFFFFFFFFFFFFFFFFFFFFFFFFFF  
FFFFFFFFFFFFFFFFFFFFFFFFFFFFFFFFFFFFFFFFFFFFFFFFFFFFFFFFFFFFFFFFFFFFFFFFFFFF  
@A00155:342:HHGFNDSXY:1:1174:26865:8437 1:N:0:GAACCTAG+TCCGCATA  
ATCTCAATGCCGAGAGGGATGTGGAGGGCGAGAGAGAGCGACTTCTCTCGGGCCACAGCCTTACAGC  
TGTGGAGCACGGTATCCTCTGCCGAAACAGAGGTTGGACAAGACCGGAGGGGTCTCCTAGTTCCAAAG  
+  
FFFFFFFFFFFF:FFFFF:FFFFFFFFF,:F,:F,FFF:F,FFFF:FFFFFFFFF:FFFFFF:FFFFFFF  
FFFFFFFFFFFFF,:FFFFFF:FFFFFFFFF:F,FFFFFFFFF:FFFFFFFFFFFFF:F:F:F:FF  
@A00155:342:HHGFNDSXY:1:1174:23936:21652 1:N:0:GAACCTAG+TCCGCATA  
ACTTACACGGTAGGTCGTGAACAAGCCCGAGTACATCTCCTTTGGAACCTCGAGACCCCTCCGGTCT  
TGTCCAACCTCTGTTTCGGCAGAGGATACCGTGCTCCACAGCTGTAAGGCTGTGGGCCCCGAGAGAAG  
+  
FFFFFFF,F:F:FFFFFFFFF:F:F,FFFFFFFFF::FFF:FF:F:FFFFFFF:,F,FFFF:FFFFF,F:F:  
,F,FFF:F:FFFFF:FFFFFFFFF:F:,,:FFFFFFFF:FF:FF:F:FFFFFFFFF:FFFFFFFFFFFF  
@A00155:342:HHGFNDSXY:1:1174:28899:23891 1:N:0:GAACCTAG+TCCGCATA  
ACCGTGCTCCACAGCTGTAAGGCTGTGGGCCCGAGAGAAGTCGCTCTCTCTCGCCCTCCACATCCCTC  
TCGGCATTGAGATGACCATAGGCCAGAGGTGAGTCCTTAAGTGACACAGCTGATCTAAGGCGGTGTG  
+  
FFFFFFFFF:FFFFFFFFFFFFFFFFFFFFFFFFFFFFFFFFFFFFFFFFFFFFFFFFFFFFFFFFFFFFFFFF  
FFFFFFFFFFFFFFFFF:FFFFFFFFFFFFFFFFFFFFFFFFFFFFFFFFFFFFFFFFFFFFFFFFFFFFFFFF  
@A00155:342:HHGFNDSXY:1:1174:7708:26490 1:N:0:GAACCTAG+TCCGCATA  
ACCTCTGTTTCGGCAGAGGATACCGTGCTCCACAGCTGTAAGGCTGTGGGCCCGAGAGAAGTCGCTCT  
CTCTCGCCCTTCACATCCCTCTCGGCATTGAGATGACCATAGGCCAGAGGTGAGTCCTTAAGTGACAC  
+  
FFFFFFFFFFFFFFFFFFFFFFFFFFFFFFFFFFFFFFFFFFFFFFFFFFFFFFFFFFFFFFFFFFFFFFFFFFFF  
FFFFFFFFFFFFFFFFF:FFFFFFFFFFFFFFFFFFFFFFFFFFFFFFFFFFFFFFFFFFFFFFFFFFFFFFFF

[illegible]

+  
@A00155:342:HHGFNDSXY:1:1178:2790:30499 1:N:0:GAACCTAG+TCCGCATA  
TTGTCATCTCAATGCCGAGAGGGATGTGGAGGGCGAGAGAGAGCGACTTCTCTCGGGCCCCACAGCCTT  
ACAGCTGTGGAGCACGGTATCCTCTGCCGAAACAGAGGTTGGACAAGACCGGAGGGGTCTCCTAGTTC  
+  
FFFFFFFFFFFFFFFFFFFFFFFFFFFFFFFFFFFFFFFF:F:FFF:FFFFFFFFFFFFFFFFFFFFFFFFFFFFF  
FFFFFFFFFFFFFFFFFFFFFFFFFFFFFFFFFFFFFFFFFFFFFFFFFFFFFFFFFFFFFFFFFFFFFFFFFFFFF  
@A00155:342:HHGFNDSXY:1:1201:20546:3474 1:N:0:GAACCTAG+TCCGCATA  
TTCTCTCGGGCCCACAGCCTTACAGCTGTGGAGCACGGTATCCTCTGCCGAAACAGAGGTTGGACAAG  
ACCGGAGGGGTCTCCTAGTTCAAAGGAGATGTACTCCGGGCTTGTTACGACCTACCGTGTAAGTCG  
+  
FFFFFFFFFFFFFFFFFFFFFFFFFFFFFFFFFFFFFFFFFFFFFFFFFFFFFFFFFFFFFFFFFFFFFFFFFFFFF  
FFFFFFFFFFFFFFFFFFFFFFFFFFFFFFFFFFFFFFFFFFFFFFFFFFFFFFFFFFFFFFFFFFFFFFFFFFFFF  
@A00155:342:HHGFNDSXY:1:1201:32280:5447 1:N:0:GAACCTAG+TCCGCATA  
TTACAGCTGTGGAGCACGGTATCCTCTGCCGAAACAGAGGTTGGACAAGACCGGAGGGGTCTCCTAGT  
TCAAAGGAGATGTACTCCGGGCTTGTTACGACCTACCGTGTAAGTCGTAAGTCTAGTAGGCTACCTG  
+  
FFFFFFFFFFFFFFFFFFFFFFFFFFFFFFFFFFFFFFFFFFFFFFFFFFFFFFFFFFFFFFFFFFFFFFFFFFFFF  
FFFFFFFFFFFFFFFFFFFFFFFFFFFFFFFFFFFFFFFFFFFFFFFFFFFFFFFFFFFFFFFFFFFFFFFFFFFFF  
@A00155:342:HHGFNDSXY:1:1201:3549:6417 1:N:0:GAACCTAG+TCCGCATA  
GAGGGCGAGAGAGAGCGACTTCTCTCGGGCCCCACAGCCTTACAGCTGTGGAGCACGGTATCCTCTGCC  
GAAACAGAGGTTGGACAAGACCGGAGGGGTCTCCTGGTTCAAAGGAGATGTACTCCGGGCTTGTTCA  
+  
FFFFFFF,FFFFFFFFFFFFFFFFFFFFFFFFFFFFFFFFFFFFFFFF,FFFFFFFFFFFFFFFFF  
FF:FFFFFFFFFFFFFFFFFFFFFFFFFFFFFFFFFFFFFFFFFFFFFFFFFFFFFFFFFFFFFFFFFFFFFFFFF  
@A00155:342:HHGFNDSXY:1:1201:10963:25269 1:N:0:GAACCTAG+TCCGCATA  
ATGCCGAGAGGGATGTGGAGGGCGAGAGAGAGCGACTTCTCTCGGGCCCCACAGCCTTACAGCTGTGA  
GCACGGTATCCTCTGCCGAAACAGAGGTTGGACAAGACCGGAGGGGTCTCCTAGTTCAAAGGAGATG  
+  
FFFFFFFFFFFFFFFFFFFFFFFFFFFFFFFFFFFFFFFF:F:FFFFFFFFFFFFFFFFFFFFFFFF,FFFFFFFFF  
FFFFFFFFFFFFFFFFFFFFFFFFFFFFFFFFFFFFFFFFFFFFFFFFFFFFFFFFFFFFFFFFFFFFFFFFFFFFF  
@A00155:342:HHGFNDSXY:1:1201:27154:34272 1:N:0:GAACCTAG+TCCGCATA  
AGCGACTTCTCTCGGGCCCCACAGCCTTACAGCTGTGGAGCACGGTATCCTCTGCCGAAACAGAGGTTG  
GACAAGACCGGAGGGGTCTCCTAGTTCAAAGGAGATGTACTCCGGGCTTGTTACGACCTACCGTGT  
+  
FFFFFFFFFFFFFFFFFFFFFFFFFFFFFFFFFFFFFFFFFFFFFFFFFFFFFFFFFFFFFFFFFFFFFFFFFFFFF  
FFFFFFFFFFFFFFFFFFFFFFFFFFFFFFFFFFFFFFFF,FFFFFFFFFFFFFFFFFFFFFFFFFFFFFFFFFFFFF  
@A00155:342:HHGFNDSXY:1:1202:12147:25379 1:N:0:GAACCTAG+TCCGCATA  
GGATGTGGAGGGCGAGAGAGAGCGACTTCTCTCGGGCCCCACAGCCTTACAGCTGTGGAGCACGGTATC  
CTCTGCCGAAACAGAGGTTGGACAAGACCGGAGGGGTCTCCTAGTTCAAAGGAGATGTACTCC  
+  
FFFFFFFFFFFFFFFFFFFFFFFFFFFFFFFFFFFFFFFFFFFFFFFFFFFFFFFFFFFFFFFFFFFFFFFFFFFFF  
FFFFFFFFFFFFFFFFFFFFFFFFFFFFFFFFFFFFFFFFFFFFFFFFFFFFFFFFFFFFFFFFFFFFFFFFFFFFF  
@A00155:342:HHGFNDSXY:1:1202:10474:27962 1:N:0:GAACCTAG+TCCGCATA  
AGAGAGAGCGACTTCTCTCGGGCCCCACAGCCTTACAGCTGTGGAGCACGGTATCCTCTGCCGAAACAG  
AGGTTGGACAAGACCGGAGGGGTCTCCTGGTTCAAAGGAGATGTACTCCGGGCTTGTTACGACCTA  
+  
FFFFFFFFFFFFFFFFFFFFFFFFFFFFFFFFFFFFFFFF:F:FFFFFFFFFFFFFFFFFFFFFFFFFFFFFFFFF  
FFFFFFFFFFFFFFFFFFFFFFFFFFFFFFFFFFFFFFFFFFFFFFFFFFFFFFFFFFFFFFFFFFFFFFFFFFFFF  
@A00155:342:HHGFNDSXY:1:1202:6207:34788 1:N:0:GAACCTAG+TCCGCATA  
GAGCGACTTCTCTCGGGCCCCACAGCCTTACAGCTGTGGAGCACGGTATCCTCTGCCGAAACAGAGGTT  
GGACAAGACCGGAGGGGTCTCCTAGTTCAAAGGAGATGTACTCCGGGCTTGTTACGACCTACCGTG  
+  
FFFFFFFFFFFFFFFFFFFFFFFFFFFFFFFFFFFFFFFF:F:FFFFFFFFFFFFFFFFFFFFFFFFFFFFFFFFF  
;FFFFFFFFFFFFFFFFFFFFFFFFFFFFFFFFFFFFFFFF:FFFF:FFFFFFFFF



[illegible]

@A00155:342:HHGFNDSXY:1:1204:19361:12038 1:N:0:GAACCTAG+TCCGCATA  
ACCTCTGTTTCGGCAGAGGATACCGTGCTCCACAGCTGTAAGGCTGTGGGCCCCGAGAGAAGTCGCTCT  
CTCTCGCCCTCTACATCCCTCTCGGCATTGAGATGACCATAGGCCAGAGGTGAGTCCTTAAGTGGACA  
+  
FFFFFFFFFFFFFFFFFFFFFFFFFFFFFFFFFFFFFFFFFFFFFFFFFFFFFFFFFFFFFFFFFFFFFFFFFFFF  
FFFFFFFFFFFFFFFFFFFFFFFFFFFFFFFFFFFFFFFFFFFFFFFFFFFFFFFFFFFFFFFFFFFFFFFFFFFF  
@A00155:342:HHGFNDSXY:1:1204:24831:34444 1:N:0:GAACCTAG+TCCGCATA  
GGTCATCTCAATGCCGAGAGGGATGTGGAGGGCGAGAGAGAGCGACTTCTCTCGGGCCCACAGCCTTA  
CAGCTGTGGAGCACGGTATCCTCTGCCGAAACAGAGGTTGGACAAGACCGGAGGGGTCTCCTAGTTCC  
+  
FFFFFFFFFFFFFFFFFFFFFFFFFFFFFFFFFFFFFFFFFFFFFFFFFFFFFFFFFFFFFFFFFFFFFFFFFFFF  
FFFFFFFFFFFFFFFFFFFFFFFFFFFFFFFFFFFFFFFFFFFFFFFFFFFFFFFFFFFFFFFFFFFFFFFFFFFF  
@A00155:342:HHGFNDSXY:1:1205:21070:6167 1:N:0:GAACCTAG+TCCGCATA  
CACCTCTGGCCTATGGTCATCTCAATGCCGAGAGGGATGTGGAGGGCGAGAGAGAGCGACTTCTCTCG  
GGCCCCACAGCCTTACAGCTGTGGAGCACGGTATCCTCTGCCGAAACAGAGGTTGGACAAGACCGGAGG  
+  
FFFFFFFFFFFFFFFFFFFFFFFFFFFFFFFFFFFFFFFFFFFFFFFFFFFFFFFFFFFFFFFFFFFFFFFFFFFF  
FFFFFFFFFFFFFFFFFFFFFFFFFFFFFFFFFFFFFFFFFFFFFFFFFFFFFFFFFFFFFFFFFFFFFFFFFFFF  
@A00155:342:HHGFNDSXY:1:1205:12156:14810 1:N:0:GAACCTAG+TCCGCATA  
CCAACCTCTGTTTCGGCAGAGGATACCGTGCTCCACAGCTGTAAGGCTGTGGGCCCCGAGAGAAGTCGC  
TCTCTCTCGCCCTCCACATCCCTCTCGGCATTGAGATGACCATAGGCCAGAGGTGAGTCCTTAAGTGG  
+  
FFFFFFFFFFFFFFFFFFFFFFFFFFFFFFFFFFFFFFFFFFFFFFFFFFFFFFFFFFFFFFFFFFFFFFFFFFFF  
FFFFFFFFFFFFFFFFFFFFFFFFFFFFFFFFFFFFFFFFFFFFFFFFFFFFFFFFFFFFFFFFFFFFFFFFFFFF  
@A00155:342:HHGFNDSXY:1:1205:23502:15264 1:N:0:GAACCTAG+TCCGCATA  
AGTCTAGTAGGCTACCTGACGAGTCCTTTTAGGACGAACTTACACAACCTCGAAGAGTAACGACGGT  
TTCGTCTTGAACGGACTCATCAGGGAGCCTACTAGACTCCGACCGTCATGGGGGTTCAAACCATG  
+  
FFFFFFFFFFFFFFFFFFFFFFFFFFFFFFFFFFFFFFFFFFFFFFFFFFFFFFFFFFFFFFFFFFFFFFFFFFFF  
FFFFFFFFFFFFFFFFFFFFFFFFFFFFFFFFFFFFFFFFFFFFFFFFFFFFFFFFFFFFFFFFFFFFFFFFFFFF  
@A00155:342:HHGFNDSXY:1:1205:27272:20948 1:N:0:GAACCTAG+TCCGCATA  
AGGGATGTGGAGGGCGAGAGAGAGCGACTTCTCTCGGGCCCACAGCCTTACAGCTGTGGAGCACGGTA  
TCCTCTGTGCAAACAGAGGTTGGACAAGACCGGAGGGGTCTCCTAGTTCCAAAGGAGATGTACTCCG  
+  
FFFFF:FFFFFFFFFFFFFFFFFFFFFFFFFFFFFFFFFFFFFFFFFFFFFFFFFFFFFFFFFFFFFFFFFFFF  
FFFFFFFFFFFFFFFFFFFFFFFFFFFFFFFFFFFFFFFFFFFFFFFFFFFFFFFFFFFFFFFFFFFFFFFFFFFF  
@A00155:342:HHGFNDSXY:1:1205:18123:23015 1:N:0:GAACCTAG+TCCGCATA  
CTCTGGCCTATGGTCATCTCAATGCCGAGAGGGATGTGAAGGGCGAGAGAGAGCGACTTCTCTCGGGC  
CCACAGCCTTACAGCTGTGGAGCACGGTATCCTCTGCCGAAACAGAGGTTGGACAAGACCGGAGGGGT  
+  
FFFFFFFFFFFFFF:FFFFFFFFFFFFFFFFFFFFFFFFFFFFFFFFFFFFFFFFFFFFFFFFFFFFFFFFFFFF  
FFFFFFFFFFFFFF:FFFFFFFFFFFFFFFFFFFFFFFFFFFFFFFFFFFFFFFFFFFFFFFFFFFFFFFFFFFF  
@A00155:342:HHGFNDSXY:1:1205:3938:34585 1:N:0:GAACCTAG+TCCGCATA  
TGCCGAGAGGGATGTAGAGGGCGAGAGAGAGCGACTTCTCTCGGGCCCACAGCCTTACAGCTGTGGAG  
CACGGTATCCTCTGCCGAAACAGAGGTTGGACAAGACCGGAGGGGTCTCCTAGTTCCAAAGGAGATG  
+  
FFFFFFFFFFFFFFF,,FFFFFFFFFFFFFFFFFFFFFFFFFFFFFFFFFFFFFFFFFFFFFFFFFFFFFFFFFFFF  
FFFFFFFFFFFFFFF:FFFFFFFFFFFFFFFFFFFFFFFFFFFFFFFFFFFFFFFFFFFFFFFFFFFFFFFFFFFF  
@A00155:342:HHGFNDSXY:1:1206:26323:2018 1:N:0:GAACCTAG+TCCGCATA  
GTAAGTCGTAGTCTAGTAGGCTACCTGACGAGTCCTTTTAGGACGAACTTACACAACCTCGAAGAGT  
AACGACGGTTTCGTCTTGAACGGACTCATCAGGGAGCCTACTAGACTCCGACCGTCATGGG  
+  
FFFFFFFFFFFFFFFFFFFFFFFFFFFFFFFFFFFFFFFFFFFFFFFFFFFFFFFFFFFFFFFFFFFFFFFFFFFF  
F:F:FFF:FFFFFFFFFFFFFF:FFFFFFFFFFFFFFFFFFFFFFFFFFFFFFFFFFFFFFFFFFFFFFFFFFFF

```
@A00155:342:HHGFNDSXY:1:1206:20980:9392 1:N:0:GAACCTAG+TCCGCATA
GAGCGACTTCTCTCGGGCCCACAGCCTTACAGCTGTGGAGCACGGTATCCTCTGCCGAAACAGAGGTT
GGACAAGACCGGAGGGGTCTCCTGGTTCCAAAGGAGATGTACTCCGGGCTTGTTACGACCTACCGTG
+
FFFFFFFFFFFFFFFFFFFFFFFFFFFFFFFFFFFFFFFFFFFFFFFFFFFFFFFFFFFFFFFFFFFFFFFFFFFFF
FFFFFFFFFFFFFFFFFFFFFFFFFFFFFFFFFFFFFFFFFFFFFFFFFFFFFFFFFFFFFFFFFFFFFFFFFFFFFFF
@A00155:342:HHGFNDSXY:1:1206:5665:14278 1:N:0:GAACCTAG+TCCGCATA
CTTCTCTCGGGCCCACAGCCTTACAGCTGTGGAGCACGGTATCCTCTGCCGAAACAGAGGTTGGACAA
GACCGGAGGGGTCTCCTAGTTCCAAAGGAGATGTACTCCGGGCTTGTTACGACCTACCG
+
FFFFFFFFFFFFFFFFFFFFFFFFFFFFFFFFFFFFFFFFFFFFFFFFFFFFFFFFFFFFFFFFFFFFFFFFFFFFF
FFFFFFFFFFFFFFFFFFFFFFFFFFFFFFFFFFFFFFFFFFFFFFFFFFFFFFFFFFFFFFFFFFFFFFFFFFFFFFF
@A00155:342:HHGFNDSXY:1:1206:1940:21950 1:N:0:GAACCTAG+TCCGCATA
CCACAGCCTTACAGCTGTGGAGCACGGTATCCTCTGCCGAAACAGAGGTTGGACAAGACCGGAGGGGT
CTCCTAGTTCCAAAGGAGATGTACTCCGGGCTTGTTACGACCTACCGTGTAAGTCGTAGTCTAGTAG
+
FFFFFFFFFFFFFFFFFFFFFFFFFFFFFFFFFFFFFFFFFFFFFFFFFFFFFFFFFFFFFFFFFFFFFFFFFFFFF
FFFFFFFFFFFFFFFFFFFFFFFFFFFFFFFFFFFFFFFFFFFFFFFFFFFFFFFFFFFFFFFFFFFFFFFFFFFFFFF
@A00155:342:HHGFNDSXY:1:1206:26250:30796 1:N:0:GAACCTAG+TCCGCATA
TAGATCAGCTGTGTCCACTTAAGGACTCACCTCTGGCCTATGGTCATCTCAATGCCGAGAGGGATGTG
GAGGGCGAGAGAGAGCGACTTCTCTCGGGCCCACAGCCTTACAGCTGTGGAGCACGGTATCCT
+
FFFFFFFFFFFFFFFFFFFFFFFFFFFFFFFFFFFFFFFFFFFFFFFFFFFFFFFFFFFFFFFFFFFFFFFFFFFFF
FFFFFFFFFFFFFFFFFFFFFFFFFFFFFFFFFFFFFFFFFFFFFFFFFFFFFFFFFFFFFFFFFFFFFFFFFFFFFFF
@A00155:342:HHGFNDSXY:1:1207:21016:17253 1:N:0:GAACCTAG+TCCGCATA
GGGCGAGAGAGAGCGACTTCTCTCGGGCCCACAGCCTTACAGCTGTGGAGCACGGTATCCTCTGCCGA
AACAGAGGTTGGACAAGACCGGAGGGGTCTCCTAGTTCCAAAGGAGATGTACTCCGGGCTTGTTACAG
+
FFFFFFFFFFFFFFFFFFFFFFFFFFFFFFFFFFFFFFFFFFFFFFFFFFFFFFFFFFFFFFFFFFFFFFFFFFFFF
FFFFFFFFFFFFFFFFFFFFFFFFFFFFFFFFFFFFFFFFFFFFFFFFFFFFFFFFFFFFFFFFFFFFFFFFFFFFFFF
@A00155:342:HHGFNDSXY:1:1207:10366:18944 1:N:0:GAACCTAG+TCCGCATA
ACTTCTCTCGGGCCCACAGCCTTACTGCTGTGGAGCACGGTATCCTCTGCCGAAACAGAGGTTGGACA
AGACCGGAGGGGTCTCCTAGTTCCAAAGGAGATGTACTCCGGGCTTGTTACGACCTACCGTGTAAGT
+
FF:FFFFFFFFFFFFFFFFFFFFFFFFFFFFFFFFFFFFFFFFFFFFFFFFFFFFFFFFFFFFFFFFFFFFFFFFF
FFFFFFFFFFFFFFFFFFFFFFFFFFFFFFFFFFFFFFFFFFFFFFFFFFFFFFFFFFFFFFFFFFFFFFFFFFFFFFF
@A00155:342:HHGFNDSXY:1:1208:32072:2550 1:N:0:GAACCTAG+TCCGCATA
GAGAGGGATGTGGAGGGCGAGAGAGAGCGACTTCTCTCGGGCCCACAGCCTTACAGCTGTGGAGCACG
GTATCCTCTGCCGAAACAGAGGTTGGACAAGACCGGAGGGGTCTCCTAGTTCCAAAGGAGATGTACTC
+
F:FFFFFFFFFFFFFFFFFFFFFFFFFFFFFFFFFFFFFFFFFFFFFFFFFFFFFFFFFFFFFFFFFFFFFFFFF
FF:FFFFFFFFFFFFFFFFFFFFFFFFFFFFFFFFFFFFFFFFFFFFFFFFFFFFFFFFFFFFFFFFFFFFFFFFF
@A00155:342:HHGFNDSXY:1:1208:4806:9784 1:N:0:GAACCTAG+TCCGCATA
AGGGATGTAGAGGGCGAGAGAGAGCGACTTCTCTCGGGCCCACAGCCTTACAGCTGTGGAGCACGGTA
TCCTCTGCCGAAACAGAGGTTGGACAAGACCGGAGGGGTCTCCTAGTTCCAAAGGAGATGTACTCCG
+
FFFFFFFFFFFFFFFFFFFFFFFFFFFFFFFFFFFFFFFFFFFFFFFFFFFFFFFFFFFFFFFFFFFFFFFFFFFFF
FFFFFFFFFFFFFFFFFFFFFFFFFFFFFFFFFFFFFFFFFFFFFFFFFFFFFFFFFFFFFFFFFFFFFFFFFFFFFFF
@A00155:342:HHGFNDSXY:1:1208:19434:11162 1:N:0:GAACCTAG+TCCGCATA
AGGGATGTGGAGGGCGAGAGAGAGCGACTTCTCTCGGGCCCACAGCCTTACAGCTGTGGAGCACGGTA
TCCTCTGCCGAAACAGAGGTTGGACAAGACCGGAGGGGTCTCCTAGTTCCAAAGGAGATG
```

$+$ 

@A00155:342:HHGFNDSXY:1:1209:4101:5963 1:N:0:GAACCTAG+TCCGCATA  
AGAGAGAGCGACTTCTCTCGGGCCACAGCCTTACAGCTGTGGAGCACGGTATCCTCTGCCGAAACAG  
AGGTTGGACAAGACCGGAGGGGTCTCCTGGTTCCAAAGGAGATGTACTCCGGGCTTGTTACAG

+

@A00155:342:HHGFNDSXY:1:1209:32723:16673 1:N:0:GAACCTAG+TCCGCATA  
GCGAGAGAGAGCGACTTCTCTCGGGCCACAGCCTTACAGCTGTGGAGCACGGTATCCTCTGCCGAAA  
CAGAGGTTGGACAAGACCGGAGGGGTCTCCTAGTTCCAAAGGAGATGTACTCCGGGCTTGTTACACGAC

+

@A00155:342:HHGFNDSXY:1:1209:4264:17331 1:N:0:GAACCTAG+TCCGCATA  
CTATGGTCATCTCAATGCCGAGAGGGATGTGGAGGGCGAGAGAGAGCGACTTCTCTCGGGCCACAGC  
CTTACAGCTGTGGAGCACGGTATCCTCTGCCGAAACAGAGGTTGGACAAGACCGGAGGGGTCTCCTAG

+

@A00155:342:HHGFNDSXY:1:1209:24903:31501 1:N:0:GAACCTAG+TCCGCATA  
CAATGCCGAGAGGGATGTGGAGGGCGAGAGAGAGCGACTTCTCTCGGGCCCACAGCCTTACAGCTGTG  
GAGCACGGTATCCTCTGCCGAAACAGAGGTTGGACAAGACCGGAGGGGTCTCCTAGTTCCAAAG

+

@A00155:342:HHGFNDSXY:1:1209:32922:31735 1:N:0:GAACCTAG+TCCGCATA  
GGATGTAGAGGGCGAGAGAGAGCGACTTCTCTCGGGCCACAGCCTTACAGCTGTGGAGCACGGTATC  
CTCTGCCGAAACAGAGGTTGGACAAGACCGGAGGGGTCTCCTAGTTCCAAAGGAGATGTACTCC

+

@A00155:342:HHGFNDSXY:1:1210:3369:16720 1:N:0:GAACCTAG+TCCGCATA  
AGATCAGCTGTGTCCACTTAAGGACTCACCTCTGGCCTATGGTCATCTCAATGCCGAGAGGGATGTAG  
AGGGCGAGAGAGAGCGACTTCTCTCGGGCCACAGCCTTACAGCTGTGGAGCACGGTATCCTCTGCCG

+

@A00155:342:HHGFNDSXY:1:1210:15537:20854 1:N:0:GAACCTAG+TCCGCATA  
CTTCTCTCGGGCCACAGCCTTACAGCTGTGGAGCACGGTATCCTCTGCCGAAACAGAGGTTGGACAA  
GACCGGAGGGGTCTCCTAGTTCCAAAGGAGATGTACTCCGGGCTTGTTACAGACCTACCGTGTAAGTC

+

@A00155:342:HHGFNDSXY:1:1210:11487:23359 1:N:0:GAACCTAG+TCCGCATA  
CTCAATGCCGAGAGGGATGTGGAGGGCGAGAGAGAGCGACTTCTCTCGGGCCACAGCCTTACAGCTG  
TGGAGCACGGTATCCTCTGCCGAAACAGAGGTTGGACAAGACCGGAGGGGTCTCCTAGTTCCAAAGGA

+

[illegible]

[illegible]

@A00155:342:HHGFNDSXY:1:1213:30083:11631 1:N:0:GAACCTAG+TCCGCATA  
TTCTCTCGGGCCACAGCCTTACAGCTGTGGAGCACGGTATCCTCTGCCGAAACAGAGGTTGGACAAG  
ACCGGAGGGGTCTCCTGGTTCCAAAGGAGATGTACTCCGGGCTTGTTACGACCTACCGTGTAAAG

[illegible]

+

```
FFFFFFFFFFFFFFFF:FFFFFFFFFFFFFFFFFFFFFFFFFFFFFFFFFFFFF,,FFFFFF  
FFFFFFFFFFFFFFFF:FFFFFFFFFFFFFFFFFFFFFFFFFFFFFFFFFFFFF
```

[illegible]

```
@A00155:342:HHGFNDSXY:1:1217:24496:19742 1:N:0:GAACCTAG+TCCGCATA
GAGCGACTTCTCTCGGGCCCACAGCCTTACA ACTGTGGAGCACGGTATCCTCTGCCGAAACAGAGGTT
GGACAAGACCGGAGGGGTCTCCTAGTTCAAAGGAGATGTACTCCGGGCTTGTTACGACCTACCGTG
+
FFFFFFFFFFFFFFFFFFFFFFFFFFFFFFFFFFFFFFFFFFFFFFFFFFFFFFFFFFFFFFFFFFFFF
FFFFFFFFFFFFFFFFFFFFFFFFFFFFFFFFFFFFFFFFFFFFFFFFFFFFFFFFFFFFFFFFFFFFF:FFF
@A00155:342:HHGFNDSXY:1:1217:1651:30436 1:N:0:GAACCTAG+TCCGCATA
GAGCGACTTCTCTCGGGCCCACAGCCTTACA ACTGTGGAGCACGGTATCCTCTGCCGAAACAGAGGTT
GGACAAGACCGGAGGGGTCTCCTAGTTCAAAGGAGATGTACTCCGGGCTTGTTACGACCTACCGTG
+
FFFFFFFFFFFFFFFFFF:FFFF:FFFFFFFFFFFFFFFFFFFFFFFFFFFFFFFFFFFFFFFFFFFF, FFFFFFFF
FFFFFFFFFFFFFFFFFFFFFFFFFFFFFFFFFFFFFFFFFFFFFFFFFFFFFFFFFFFFFFFFFFFFF:FFFF
@A00155:342:HHGFNDSXY:1:1217:3061:31908 1:N:0:GAACCTAG+TCCGCATA
ATCTCAATGCCGAGAGGGATGTAGAGGGCGAGAGAGAGCGACTTCTCTCGGGCCCACAGCCTTACAGC
TGTGGAGCACGGTATCCTCTGCCGAAACAGAGGTTGGACAAGACCGGAGGGGTCTCCTAGTTCAAAG
+
FFFFFFFFFFFFFFFFFFFFFFFFFFFFFFFFFF:FF:FFFFFFFFFF:FFF:FFFF:FFFFFF:FFFFFFFF
FFFFFFFFFFFFFFFFFFFFFFFFFFFFFFFFFFFFFFFFFFFFFFFFFFFFFFFFFFFFFFFFFFFFF:F
@A00155:342:HHGFNDSXY:1:1218:3504:21183 1:N:0:GAACCTAG+TCCGCATA
CTCTGGCCTAAGGTCATCTCAATGCCGAGAGGGATGTGGAGGGCGAGAGAGAGCGACTTCTCTCGGGC
CCACAGCCTTACAGCTGTGGAGCACGGTATCCTCTGCCGAAACAGAGGTTGGACAAGACCGGAGGGGT
+
FFFFFFFFFFFFFFFFFFFFFFFFFFFFFFFFFF:FFFFFFFFFFFF:FFFFF, FFFFFFFFFFFFFFFFFFFFFF
FFFFFFFFFFFFFFFFFFFFFFFFFFFFFFFFFFFFFFFFFFFFFFFFFFFFFFFFFFFFFFFFFFFFF:FFF
@A00155:342:HHGFNDSXY:1:1218:17499:27633 1:N:0:GAACCTAG+TCCGCATA
GGCAGAGGATACCGTGCTCCACAGCTGTAAGGCTGTGGGCCCGAGAGAAGTCGCTCTCTCGCCCTC
CACATCCCTCTCGGCATTGAGATGACCATAGGCCAGAGGAGAGTCCTTAAGTGGACA
+
FFFFFFFFFFFFFFFFFFFFFFFFFFFFFFFFFFFFFFFFFFFFFFFFFFFFFFFFFFFFFFFFFFFFF
FFFFFFFFFFFFFFFFFFFFF:FFFFFFFFFFFFFFFFFFFFFFFFFFFFFFFFFFFFFFFFFFFFF
@A00155:342:HHGFNDSXY:1:1218:9742:29637 1:N:0:GAACCTAG+TCCGCATA
CTCTCGGGCCCCACAGCCTTACAGCTGTGGAGCACGGTATCCTCTGCCGAAACAGAGGTTGGACAAGAC
CGGAGGGGTCTCCTAGTTCAAAGGAGATGTACTCCGGGCTTGTTACGACCTACCGTGTAAGTCGTA
+
FFFFFFFFFFFFFFFFFFFFFFFFFF:FFFFFFFFFFFFFFFFFFFFFFFFFFFFFFFFFFFFFFFFFFFF, FF
FFFFFFFFFFFFFFFFFFFFFFFFFFFFFFFFFFFFFFFFFFFFFFFFFFFFFFFFFFFFFFFFFFFFF
@A00155:342:HHGFNDSXY:1:1218:15917:33567 1:N:0:GAACCTAG+TCCGCATA
GGGCGAGAGAGAGCGACTTCTCTCGGGCCCACAGCCTTACAGCTGTGGAGCACGGTATCCTCTGCCGA
AACAGAGGTTGGACAAGACCGGAGGGGTCTCCTAGTTCAAAGGAGATGTACTCCGGGCTTGTTACG
+
FFFFFFFFFFFFFFFFFFFFFFFFFFFFFFFFFFFFFFFFFFFFFFFFFFFFFFFFFFFFFFFFFFFFF
FFFFFFFFFFFFFFFFFFFFFFFFFFFFFFFFFFFFFFFFFFFFFFFFFFFFFFFFFFFFFFFFFFFFF:FF:FFFFFFFF
@A00155:342:HHGFNDSXY:1:1218:25229:36855 1:N:0:GAACCTAG+TCCGCATA
TTACAGCTGTGGAGCACGGTATCCTCTGCCGAAACAGAGGTTGGACAAGACCGGAGGGGTCTCCTAGT
TCAAAGGAGATGTACTCCGGGCTTGTTACGACCTACCGTGTAAGTCGTAAGTCTAGTAGGCTACCTG
+
FF, FFFFFFFFFFFFFFFFFFFFFFFFFFFFFFFFFFFFFFFFFFFFFFFFFFFFFFFFFFFFFFFFFFFFFF
FFFFFFFFFFFFFFFFFFFFFFFFFFFFFFFFFFFFFFFFFFFFFFFFFFFFFFFFFFFFFFFFFFFFF:FFFFFFFF
@A00155:342:HHGFNDSXY:1:1219:14850:16313 1:N:0:GAACCTAG+TCCGCATA
CGACTTCTCTCGGGCCCACAGCCTTACAGCTGTGGAGCACGGTATCCTCTGCCGAAACAGAGGTTGGA
CAAGACCGGAGGGGTCTCCTGGTTCAAAGGAGATGTACTCCGGGCTTGTTACGACCTACCGTGTA
```



@A00155:342:HHGFNDSXY:1:1219:15917:16313 1:N:0:GAACCTAG+TCCGCATA  
CGACTTCTCTCGGGCCACAGCCTTACAGCTGTGGAGCACGGTATCCTCTGCCGAAACAGAGGTTGGA  
CAAGACCGGAGGGGTCTCCTGGTTCCAAAGGAGATGTACTCCGGGCTTGTTACGACCTACCGTGTA  
+  
FFFFFFFFFFFFFFFFFFFFFFFFFFFFFFFFFFFFFFFFFFFFFFFFFFFFFFFFFFFFFFFFFFFFFFFF  
FFFFFFFFFFFFFFFFFFFFFFFFFFFFFFFFFFFFFFFFFFFFFFFFFFFFFFFFFFFFFFFFFFFFFFFF:FF,F  
@A00155:342:HHGFNDSXY:1:1219:9200:27352 1:N:0:GAACCTAG+TCCGCATA  
CCTCTGGCCTATGGTCATCTCAATGCCGAGAGGGATGTGAAGGGCGAGAGAGAGCGACTTCTCTCGGG  
CCCACAGCCTTACAGCTGTGGAGCACGGTATCCTCTGCCGAAACAGAGGTTGGAC  
+  
FFFFFFFFFFFFFFFFFFFFFFFFFFFFFFFFFFFFFFFFFFFFFFFFFFFFFFFFFFFFFFFFFFFFFFFF  
FFFFFFFFFFFFFFFFFFFFFFFFFFFFFFFFFFFFFFFFFFFFFFFFFFFFFFFFFFFFFFFFFFFFFFFF  
@A00155:342:HHGFNDSXY:1:1219:10845:29575 1:N:0:GAACCTAG+TCCGCATA  
CTCTGGCCTATGGTCATCTCAATGCCGAGAGGGATGTGAAGGGCGAGAGAGAGCGACTTCTCTCGGGC  
CCACAGCCTTACAGCTGTGGAGCACGGTATCCTCTGCCGAAACAGAGGTTGGACAAGACCGGAG  
+  
FFFFFFFFFFFFFFFFFFFFFFFFFFFFFFFFFFFFFFFFFFFFFFFFFFFFFFFFFFFFFFFFFFFFFFFF  
FFFFFFFFFFFFFFFFFFFFFFFFFFFFFFFFFFFFFFFFFFFFFFFFFFFFFFFFFFFFFFFFFFFFFFFF,FFFFFFFF  
@A00155:342:HHGFNDSXY:1:1220:13666:16861 1:N:0:GAACCTAG+TCCGCATA  
CCACCACACCGCCTTAGATCAGCTGTGTCCACTTAAGGACTCACCTCTGGCCTATGGTCATCTCAATG  
CCGAGAGGGATGTGGAGGGCGAGAGAGAGCGACTTCTCTCGGGCCACAGCCTTACAGCTGTGGAGCA  
+  
FFFFFFFFFFFFFFFFFFFFFFFFFFFFFFFFFFFFFFFFFFFFFFFFFFFFFFFFFFFFFFFFFFFFFFFF  
FFFFFFFFFFFFFFFFFFFFFFFFFFFFFFFFFFFFFFFFFFFFFFFFFFFFFFFFFFFFFFFFFFFFFFFF,FFFFFFFF  
@A00155:342:HHGFNDSXY:1:1220:26901:21684 1:N:0:GAACCTAG+TCCGCATA  
CTTCTCTCGGGCCACAGCCTTACAGCTGTGGAGCACGGTATCCTCTGCCGAAACAGAGGTTGGACAA  
GACCGGAGGGGTCTCCTAGTTCCAAAGGAGATGTACTCCGGGCTTGTTACGACCTACCGTGTAAGT  
+  
FFFF:FFFF::FFFF:F,FF:F:,FFF,,F,FF:FF,:FFFF,FF,,FFF:F,FFFF,:FFFF  
FFF,F,F,,FFFFFFFF,FFFF:FFFFFFFF,FF::,FFFF,:F,F,FF,FFFFFFFF:F  
@A00155:342:HHGFNDSXY:1:1220:5828:36730 1:N:0:GAACCTAG+TCCGCATA  
GAGCGACTTCTCTCGGGCCACAGCCTTACAGCTGTGGAGCACGGTATCCTCTGCCGAAACAGAGGTT  
GGACAAGACCGGAGGGGTCTCCTAGTTCCAAAGGAGATGTACTCCGGGCTTGTTACGACCTACCGTG  
+  
FFFFFFFFFFFFFFFFFFFFFFFFFFFFFFFFFFFFFFFFFFFFFFFFFFFFFFFFFFFFFFFFFFFFFFFF  
FFFFFFFFFFFFFFFFFFFFFFFFFFFFFFFFFFFFFFFFFFFFFFFFFFFFFFFFFFFFFFFFFFFFFFFF  
@A00155:342:HHGFNDSXY:1:1221:9661:2315 1:N:0:GAACCTAG+TCCGCATA  
CACGGTAGTCTGTAACAAGCCCGGAGAACATCTCCTTTGGAAGTGGAGACCCCTCCGGTCTTGTC  
AACCTCTGTTTCGGCAGAGGATACCGTGCTCCACAGCTGTAAGGCTGTGGGCCCGAGAGAAGTCGCTC  
+  
FFFFFFFFFFFFFFFFFFFFFFFFFFFFFFFFFFFFFFFFFFFFFFFFFFFFFFFFFFFFFFFFFFFFFFFF  
FFFFFFFFFFFFFFFFFFFFFFFFFFFFFFFFFFFFFFFFFFFFFFFFFFFFFFFFFFFFFFFFFFFFFFFF  
@A00155:342:HHGFNDSXY:1:1221:6207:19476 1:N:0:GAACCTAG+TCCGCATA  
CTCTCGCCCTCCACATCCCTCTCGGCATTGAGATGACCATAGGCCAGAGGTGAGTCCTTAAGTGGACA  
CAGCTGATCTAAGGCGGTGTGGCGGGGCATGGGTTTGAACCCCATGACGGTCGGAGTCTAGTAGGCT  
+  
FFFFFFFFFFFFFFFFFFFFFFFFFFFFFFFFFFFFFFFF,F,FFFFFFFF,FFFFFFFFFFFFFFFFFFFFF,  
FFFFFF:FFF:FFFFFFFFFFFF,F:FFFFFFFFFFFFFFFFFFFFFFFFFFFFFFFF:FFF:FFFFF  
@A00155:342:HHGFNDSXY:1:1221:9950:19789 1:N:0:GAACCTAG+TCCGCATA  
TTAAGGACTCTCCTCTGGCCTATGGTCATCTCAATGCCGAGAGGGATGTGGAGGGCGAGAGAGAGCGA  
CTTCTCTCGGGCCACAGCCTTACAGCTGTGGAGCACGGTATCCTCTGCCGAAACAGAGGTTGGACAA  
+  
FFFFFFFFFFFFFFFF:FFFF:F::FFFFFFFFFFFF:F:F:F:FFFF,:FFFFFFFF:FFFFFFFF:FF  
,FFFF:F:FFFF:F,FFF:FFFF,:FF::FFF:FFF:FFFFFFFFFFFFFFFF:FFFFFFFFFFFFF

@A00155:342:HHGFNDSXY:1:1221:20726:27618 1:N:0:GAACCTAG+TCCGCATA  
AGAGAGAGCGACTTCTCTCGGGCCCACAGCCTTACAGCTGTGGAGCACGGTATCCTCTGCCGAAACAG  
AGGTTGGACAAGACCGGAGGGGTCTCCTAGTTCAAAGGAGATGTACTCCGGGCTTGTTACGACCTA  
+  
FFFFFFFFFFFFFFFFFFFFFFFFFFFFFFFFFFFFFFFFFFFFFFFFFFFFFFFFFFFFF:FFFFFFFFFFFFF  
FFFFFFFFFFFFFFFFFFFFFFFFFFFFFFFFFFFFFFFFFFFFFFFFFFFFFFFFFFFFF:FFFFFFF  
@A00155:342:HHGFNDSXY:1:1221:32190:34945 1:N:0:GAACCTAG+TCCGCATA  
GAGCGACTTCTCTCGGGCCCACAGCCTTACAGCTGTGGAGCACGGTATCCTCTGCCGAAACAGAGGTT  
GGACAAGACCGGAGGGGTCTCCTAGTTCAAAGGAGATGTACTCCGGGCTTGTTACGACCTACCCT  
+  
FFFFFFFFFFFFFFFFFFFFFFFFFFFFFFFFFFFFFFFFFFFFFFFFFFFFFFFFFFFFF,:FFFFFFFFFFFFFFFFFFFFFFFFFFFFFFFFFFFFF  
FFFFFFF,FFFFFFFFFFFFFFFFFFFFF,FFFFFFFFFFFFFFFFFFF:FFFFFFFFFFFFFFFFF:FFFFFF:F:  
@A00155:342:HHGFNDSXY:1:1222:6696:3662 1:N:0:GAACCTAG+TCCGCATA  
AGAGAGAGCGACTTCTCTCGGGCCCACAGCCTTACAGCTGTGGAGCACGGTATCCTCTGCCGAAACAG  
AGGTTGGACAAGACCGGAGGGGTCTCCTTGTTCAAAGGAGATGTACTCCGGGCTTGTTACGAC  
+  
FFFFFFFFFFFFFFFFFFFFFFFFFFFFFFFFFFFFFFFFFFFFFFFFFFFFFFFFFFFFF  
FFFFFFFFFFFFFFFFFFFFFFFFFFFFFFFFFFFFFFFFFFFFFFFFFFFFFFFFFFFFF,FFFFFFFFFFFFFFFFFFFFFFFFFFFFFFFFFFFFF  
@A00155:342:HHGFNDSXY:1:1223:32407:16031 1:N:0:GAACCTAG+TCCGCATA  
GGACTCACCTCTGGCCTATGGTCATCTCAATGCCGAGAGGGATGTGAAGGGCGAGAGAGAGCGACTTC  
TCTCGGGCCCACAGCCTTACAGCTGTGGAGCACGGTATCCTCTGCCGAAACAGAGGTTGGACAA  
+  
FFFFFFFFFFFFFFFFFFFFF:FFFFFFFFFFFFFFFFFFFFFFFFFFFFFFFFFFFFFFFFFFFFFFFFFFFFFFFFFFFFF  
FFFFFFFFFFFFFFFFFFFFFFFFFFFFF:FFFFFFFFFFFFFFFFFFFFFFFFFFFFFFFFFFFFFFFFFFFFFFFFFFFFF:F  
@A00155:342:HHGFNDSXY:1:1223:14172:30076 1:N:0:GAACCTAG+TCCGCATA  
GAGGGCGAGAGAGAGCGACTTCTCTCGGGCCCACAGCCTTACAGCTGTGGAGCACGGTATCCTCTGCC  
GAAACAGAGGTTGGACAAGACCGGAGGGGTCTCCTAGTTCAAAGGAGATGTACTCCGGGCTTGTTCA  
+  
FFFFFFFFFFFFFFFFFFFFFFFFFFFFFFFFFFFFFFFFFFFFFFFFFFFFFFFFFFFFF:FFFFFFFFFFFFF  
FFFFFFFFFFFFFFFFFFFFFFFFFFFFFFFFFFFFFFFFFFFFFFFFFFFFFFFFFFFFF:FFFF:FFFFFFFFFFFFF  
@A00155:342:HHGFNDSXY:1:1223:17824:31704 1:N:0:GAACCTAG+TCCGCATA  
TGTGTCCACTTAAGGACTCACCTCTGGCCTATGGTCATCTCAATGCCGAGAGGGATGTAGAGGGCGAG  
AGAGAGCGACTTCTCTCGGGCCCACAGCCTTACAGCTGTGGAGCACGGTATCCTCTGCCGAAACAGAG  
+  
FFFFF:FF,:FFFFFFFFFFFFFFFFFFFFFFFFFFFFF:FF:FFFFFFFFFFFFF:FFFFFFFFF:FF:FFFFFFFFFFFFF  
FFFFFFFFFFFF:FFFFFFFFFFFFFFFFFFFFF:F:FFFFFFFF:FFF:FFFFF:FFFFFFFFFFFF:FFFF,FFF:F  
@A00155:342:HHGFNDSXY:1:1223:11198:35415 1:N:0:GAACCTAG+TCCGCATA  
TATCCTCTGCCGAAACAGAGGTTGGACAAGACCGGAGGGGTCTCCTAGTTCAAAGGAGATGTACTCC  
GGGCTTGTTACGACCTACCGTGTAAGTCGTAGTCTAGTAGGCTACCTGACGAGTCCTTTTTAGGACG  
+  
FFFFFFFFFFFFFFFFFFFFFFFFFFFFFFFFFFFFFFFFFFFFFFFFFFFFFFFFFFFFF:FFFFFFFFFFFFFFFFFFFFFFFFFFFFFFFFFFFFF  
FFFFFFFFFFFFFFFFFFFFFFFFFFFFFFFFFFFFFFFFFFFFFFFFFFFFFFFFFFFFF:FFFFFFFFFFFFFFFFFFFFFFFFFFFFF  
@A00155:342:HHGFNDSXY:1:1224:2537:11835 1:N:0:GAACCTAG+TCCGCATA  
GTCCACTTAAGGACTCACCTCTGGCCTATGGTCATCTCAATGCCGAGAGGGATGTGGAGGGCGAGAGA  
GAGCGACTTCTCTCGGGCCCACAGCCTTACAGCTGTGGAGCACGGTATCCTCTGCCGAAACAGAGGTT  
+  
FFFFFFFFFFFFFFFFFFFFFFFFFFFFFFFFFFFFFFFFFFFFFFFFFFFFFFFFFFFFF:FFFFFFFFFFFFF  
FFFFFFFFFFFFFFFFFFFFFFFFFFFFFFFFFFFFFFFFFFFFFFFFFFFFFFFFFFFFF:FFFFFFFFFFFFFFFFFFFFFFFFFFFFF  
@A00155:342:HHGFNDSXY:1:1224:2889:19523 1:N:0:GAACCTAG+TCCGCATA  
TGGTCATCTCAATGCCGAGAGGGATGTGGAGGGCGAGAGAGAGCGACTTCTCTCGGGCCCACAGCCTT  
ACAGCTGTGGAGCACGGTATCCTCTGCCGAAACAGAGGTTGGACAAGACCGGAGGGGTCTCCTAGTTC

@A00155:342:HHGFNDSXY:1:1224:20356:32487 1:N:0:GAACCTAG+TCCGCATA  
GAGAGGGATGTAGAGGGCGAGAGAGAGCGACTTCTCTCGGGCCACAGCCTTACAGCTGTGGAGCACG  
GTATCCTCTGCCGAAACAGAGGTTGGACAAGACCGGAGGGGTCTCCTAGTTCCAAAGGAGATG

[illegible]

+

```

FFFFFFFFFFFFFFFF,FFFFFF:FFF::FFFFFFFF:FFFFFFFF,FFFFFFFFFFFFFFFF:FFF
FFFFFFFF:FFFFFFFFFFFFFFFFFFFFFFFFFFFF:::FFFF:FFFF,FFFFFFFFFFF:FFF

```

+

[illegible]

+

```

:FFF:FFFFFF:FFFFFFFFFFFFFFFF:FFFF:F,F:F:FFFFFF:F:F,F,FFFFF:FFF:,FFFFFF
F:FFF,F,FF:.,FFFFFFF:F,,FFFFFFFFF,,FFFF:::,FF:FFF:,FFFFFFF,FFF:F:F,F:

```

+

[illegible]

+

[illegible] $+$ [illegible] $+$ [illegible]

+

[illegible]

[illegible]

@A00155:342:HHGFNDSXY:1:1228:6108:17487 1:N:0:GAACCTAG+TCCGCATA  
TGTTTTCGGCAGAGGATACCGTGCTCCACAGCTGTAAGGCTGTGGGCCCGAGAGAAGTCGCTCTCTCTC  
GCCCTTCACATCCCTCTCGGCATTGAGATGACCATAGGCCAGAGGTGAGTCCTTAAGTGGACACAGCT  
+  
,FFFFFFFFFFFFFFFFFFFFFFFF:FFFF:FFFFFFFFFFFFFFFFFFFFFFFFFFFFFFFFFFFFFFFF  
FFFFFFFFFFFFFFFFFFFFFFFF:FF:::FFF:F:FFFFFF:FFFFFFFFFFFFFFFFFFFFFFFFFFFFF  
@A00155:342:HHGFNDSXY:1:1228:10511:18223 1:N:0:GAACCTAG+TCCGCATA  
TCTCTCGGGCCACAGCCTTACAGCTGTGGAGCACGGTATCCTCTGCCGAAACAGAGGTTGGACAAGA  
CCGGAGGGGTCTCCTAGTTCCAAAGGAGATGTACTCCGGGCTTGTTACAGACCTACCGTGTAAAG  
+  
FFFFFFFFFFFFFFFFFFFFFFFF,FFFFFFFFFFFFFFFFFFFFFFFFFFFFFFFFFFFFFFFFFFFFFFFF  
FFFFFFFFFFFFFFFFFFFFFFFFFFFFFFFFFFFFFFFFFFFFFFFFFFFFFFFFFFFFFFFFFFFFFFFF,FF::F  
@A00155:342:HHGFNDSXY:1:1228:22851:20181 1:N:0:GAACCTAG+TCCGCATA  
GGTATCCTCTGCCGAAACAGAGGTTGGACAAGACCGGAGGGGTCTCCTAGTTCCAAAGGAGATGTACT  
CCGGGCTTGTTACAGACCTACCGTGTAAAGTCGTAGTCTAATAGGCTACCTGACGAGTCCTTTTATAGGA  
+  
FFFFFFFFFFFFFFFFFFFFFFFFFFFFFFFFFFFFFFFFFFFFFFFFFFFFFFFFFFFFFFFFFFFFFFFF  
FFFFFFFFFFFFFFFFFFFFFFFFFFFFFFFFFFFFFFFFFFFFFFFFFFFFFFFFFFFFFFFFFFFFFFFF  
@A00155:342:HHGFNDSXY:1:1228:21983:21840 1:N:0:GAACCTAG+TCCGCATA  
GGTATCCTCTGCCGAAACAGAGGTTGGACAAGACCGGAGGGGTCTCCTAGTTCCAAAGGAGATGTACT  
CCGGGCTTGTTACAGACCTACCGTGTAAAGTCGTAGTCTAATAGGCTACCTGACGAGTCCTTTTATAGGA  
+  
FFFFFFFFFFFFFFFFFFFFFFFFFFFFFFFFFFFFFFFFFFFFFFFFFFFFFFFFFFFFFFFFFFFFFFFF  
FFFFFFFFFFFFFFFFFFFFFFFFFFFFFFFFFFFFFFFFFFFFFFFFFFFFFFFFFFFFFFFFFFFFFFFF  
@A00155:342:HHGFNDSXY:1:1228:3794:23813 1:N:0:GAACCTAG+TCCGCATA  
GAGCGACTTCTCTCGGGCCACAGCCTTACAGCTGTGGAGCACGGTATCCTCTGCCGAAACAGAGGTT  
GGACAAGACCGGAGGGGTCTCCTAGTTCCAAAGGAGATGTACTCCGGGCTTGTTACAGACCTACCGTG  
+  
FFFFFFFFFFFFFFFFFFFFFFFFFFFFFFFFFFFFFFFFFFFFFFFFFFFFFFFFFFFFFFFFFFFFFFFF  
FFFFFFF:FFFFFFFFFFFFFFFFFFFFFFFFFFFFFFFFFFFFFFFFFFFFFFFFFFFFFFFFFFFFFFFF:FFF  
@A00155:342:HHGFNDSXY:1:1228:27977:27054 1:N:0:GAACCTAG+TCCGCATA  
TAGTCTAGTAGGCTACCTGACGAGTCCTTTTATAGGACGAACTTACACAACCTCGAAGAGTAACGACGG  
TTTCGTCCTTGAACGGACTCATCAGGGAGCCTACTAGACTCCGACCGTCATGGGGGTTCAAACCCAT  
+  
FFFFFFFFFFFFFFFFFFFFFFFFFFFFFFFFFFFFFFFFFFFFFFFFFFFFFFFFFFFFFFFFFFFFFFFF  
FFFFFFF:FFFFFFFFFFFFFFFFFFFFFFFFFFFFFFFFFFFFFFFFFFFFFFFFFFFFFFFFFFFFFFFF:FFFF,FFFF  
@A00155:342:HHGFNDSXY:1:1228:4390:33270 1:N:0:GAACCTAG+TCCGCATA  
AGGACTCACCTCTGGCCTATGGTCATCTCAATGCCGAGAGGGATGTAGAGGGCGAGAGAGAGCGACTT  
CTCTCGGGCCACAGCCTTACAGCTGTGGAGCACGGTATCCTCTGCCGAAACAGAGGTTGGACAAGAC  
+  
FFFFFFFFFFFFFFFFFFFFFFFFFFFFFFFFFFFFFFFFFFFFFFFFFFFFFFFFFFFFFFFFFFFFFFFF  
FFFFFFFFFFFFFFFFFFFFFFFFFFFFFFFFFFFFFFFFFFFFFFFFFFFFFFFFFFFFFFFFFFFFFFFF  
@A00155:342:HHGFNDSXY:1:1229:24252:10300 1:N:0:GAACCTAG+TCCGCATA  
AAGGACTCTCCTCTGGCCTATGGTCATCTCAATGCCGAGAGGGATGTGGAGGGCGAGAGAGAGCGACT  
TCTCTCGGGCCACAGCCTTACAGCTGTGGAGCACGGTATCCTCTGCCGAAACAGAGGTTGGACAAGA  
+  
FFFFFFFFFFFFFFFFFFFFFFFFFFFFFFFFFFFFFFFFFFFFFFFFFFFFFFFFFFFFFFFFFFFFFFFF  
FFFFFFFFFFFFFFFFFFFFFFFFFFFFFFFFFFFFFFFFFFFFFFFFFFFFFFFFFFFFFFFFFFFFFFFF,FFFFF:,FFFFFFFFF  
@A00155:342:HHGFNDSXY:1:1229:1868:16438 1:N:0:GAACCTAG+TCCGCATA  
TGCCCCACCACACCGCCTTAGATCAGCTGTGTCCACTTAAGGACTCACCTCTGGCCTATGGTCATCTC  
AATGCCGAGAGGGATGTGGAGGGCGAGAGAGAGCGACTTCTCTCGGGCCACAGCCTTACAGCTGTGG  
+  
FFFFFFFFFFFFFFFFFFFFFFFFFFFFFFFFFFFFFFFFFFFFFFFFFFFFFFFFFFFFFFFFFFFFFFFF  
FFFFFFFFF:FFFFFFFFF:FFFFFFFFFFFFFFFFFFFFFFFFFFFFFFFFFFFFFFFFFFFFFFFFFFFFF

+  
TCCTCTGCCGAAACAGAGGTGGACAAGACCGGAGGGGTCTCCTGGTTCCAAAGGAGATGTACTCCGG  
GCTTGTTCACGACCTACCGTGTAAGTCGTAGTCTAGTAGGCTACCTGACGAGTCCTTTTTAGGACGAA  
+  
FFFFFFFFFFFFFFFFFFFFFFFFFFFFFFFFFFFFFFFFFFFFFFFFFFFFFFFFFFFFFFFFFFFFFFFFFFFFF  
FFFFFFFFFFFFFFFFFFFFFFFFFFFFFFFFFFFFFFFFFFFFFFFFFFFFFFFFFFFFFFFFFFFFFFFFFFFFF  
@A00155:342:HHGFNDSXY:1:1230:13955:3176 1:N:0:GAACCTAG+TCCGCATA  
TGGTCATCTCAATGCCGAGAGGGATGTGGAGGGCGAGAGAGCGACTTCTCTCGGGCCCACAGCCTT  
ACAGCTGTGGAGCACGGTATCCTCTGCCGAAACAGAGGTTGGACAAGACCGGAGGGGTCTCCTAGTTC  
+  
FFFFFFFFFFFFFFFFFFFFFFFFFFFFFFFFFFFFFFFFFFFFFFFFFFFFFFFFFFFFFFFFFFFFFFFFFFFFF  
FFFFFFFFFFFFFFFFFFFFFFFFFFFFFFFFFFFFFFFFFFFFFFFFFFFFFFFFFFFFFFFFFFFFFFFFFFFFF  
@A00155:342:HHGFNDSXY:1:1230:26187:6417 1:N:0:GAACCTAG+TCCGCATA  
ACTTCTCTCGGGCCCACAGCCTTACAGCTGTGGAGCACGGTATCCTCTGCCGAAACAGAGGTTGGACA  
AGACCGGAGGGGTCTCCTAGTTCCAAAGGAGATGTACTCCGGGCTTGTTCACGACCTACCGTGTAAGT  
+  
FFFFFFFFFFFFFFFFFFFFFFFFFFFFFFFFFFFFFFFFFFFFFFFFFFFFFFFFFFFFFFFFFFFFFFFFFFFFF  
FFFFFFFFFFFFFFFFFFFFFFFFFFFFFFFFFFFFFFFFFFFFFFFFFFFFFFFFFFFFFFFFFFFFFFFFFFFFF  
@A00155:342:HHGFNDSXY:1:1230:1533:11412 1:N:0:GAACCTAG+TCCGCATA  
GGGCGAGAGAGAGCGACTTCTCTCGGGCCCACAGCCTTACAGCTGTGGAGCACGGTATCCTCTGCCG  
AACAGAGGTTGGACAAGACCGGAGGGGTCTCCTAGTTCCAAAGGAGATGTACTCCGGGCTTGTTCACG  
+  
FFFFFFFFFFFFFFFFFFFFFFFFFFFFFFFFFFFFFFFFFFFFFFFFFFFFFFFFFFFFFFFFFFFFFFFFFFFFF  
FFFFFFFFFFFFFFFFFFFFFFFFFFFFFFFFFFFFFFFFFFFFFFFFFFFFFFFFFFFFFFFFFFFFFFFFFFFFF  
@A00155:342:HHGFNDSXY:1:1230:11749:12571 1:N:0:GAACCTAG+TCCGCATA  
TCTGTTTCGGCAGAGGATACCGTGCTCCACAGCTGTAAGGCTGTGGGCCCGAGAGAAGTCGCTCTCTC  
TCGCCCTTACATCCCTCTCGGCATTGAGATGACCATAGGCCAGAGGTGAGTCCTTAAGTGGACACAG  
+  
FFFFFFFFFFFFFFFFFFFFFFFFFFFFFFFFFFFFFFFFFFFFFFFFFFFFFFFFFFFFFFFFFFFFFFFFFFFFF  
FFFFFFFFFFFFFFFFFFFFFFFFFFFFFFFFFFFFFFFFFFFFFFFFFFFFFFFFFFFFFFFFFFFFFFFFFFFFF  
@A00155:342:HHGFNDSXY:1:1230:19325:13636 1:N:0:GAACCTAG+TCCGCATA  
CCCACAGCCTTACAGCTGTGGAGCACGGTATCCTCTGCCGAAACAGAGGTTGGACAAGAACGGAGGGG  
TCTCCTAGTTCCAAAGGAGATGTACTCCGGGCTTGTTCACGACCTACCGTGTAAGTCGTAGTCTAGTA  
+  
FFFFFFFFFFFFFFFFFFFFFFFFFFFFFFFFFFFFFFFFFFFFFFFFFFFFFFFFFFFFFFFFFFFFFFFFFFFFF  
FFFFFFFFFFFFFFFFFFFFFFFFFFFFFFFFFFFFFFFFFFFFFFFFFFFFFFFFFFFFFFFFFFFFFFFFFFFFF  
@A00155:342:HHGFNDSXY:1:1230:29017:34773 1:N:0:GAACCTAG+TCCGCATA  
CTTCTCTCGGGCCCACAGCCTTACAGCTGTGGAGCACGGTATCCTCTGCCGAAACAGAGGTTGGACAA  
GACCGGAGGGGTCTCCTAGTTCCAAAGGAGATGTACTCCGGGCTTGTTCACGACCTACCGTGTAAGTC  
+  
FFFFFFFFFFFFFFFFFFFFFFFFFFFFFFFFFFFFFFFFFFFFFFFFFFFFFFFFFFFFFFFFFFFFFFFFFFFFF  
FFFFFFFFFFFFFFFFFFFFFFFFFFFFFFFFFFFFFFFFFFFFFFFFFFFFFFFFFFFFFFFFFFFFFFFFFFFFF  
@A00155:342:HHGFNDSXY:1:1231:18475:12790 1:N:0:GAACCTAG+TCCGCATA  
GGATGTGGAGGGCGAGAGAGAGCGACTTCTCTCGGGCCCACAGCCTTACAGCTGTGGAGCACGGTATC  
CTCTGCCGAAACAGAGGTTGGACAAGACCGGAGGGGTCTCCTAGTTCCAAAGGAGATGTACTCC  
+  
FFFFFFFFFFFFFFFFFFFFFFFFFFFFFFFFFFFFFFFFFFFFFFFFFFFFFFFFFFFFFFFFFFFFFFFFFFFFF  
FFFFFFFFFFFFFFFFFFFFFFFFFFFFFFFFFFFFFFFFFFFFFFFFFFFFFFFFFFFFFFFFFFFFFFFFFFFFF  
@A00155:342:HHGFNDSXY:1:1231:2618:20369 1:N:0:GAACCTAG+TCCGCATA  
TCCTCTGCCGAAACAGAGGTTGGACAAGACCGGAGGGGTCTCCTAGTTCCAAAGGAGATGTACTCCGG  
GCTTGTTCACGACCTACCGTGTAAGTCGTAGTCTAGTAGGCTACCTGACGAGTCCTTTTTAGGACGAA  
+  
FFFFFFFFFFFFFFFFFFFFFFFFFFFFFFFFFFFFFFFFFFFFFFFFFFFFFFFFFFFFFFFFFFFFFFFFFFFFF  
FFFFFFFFFFFFFFFFFFFFFFFFFFFFFFFFFFFFFFFFFFFFFFFFFFFFFFFFFFFFFFFFFFFFFFFFFFFFF  
@A00155:342:HHGFNDSXY:1:1231:2618:20369 1:N:0:GAACCTAG+TCCGCATA  
TCCTCTGCCGAAACAGAGGTTGGACAAGACCGGAGGGGTCTCCTAGTTCCAAAGGAGATGTACTCCGG  
GCTTGTTCACGACCTACCGTGTAAGTCGTAGTCTAGTAGGCTACCTGACGAGTCCTTTTTAGGACGAA  
+

@A00155:342:HHGFNDSXY:1:1231:26404:34162 1:N:0:GAACCTAG+TCCGCATA  
AAGGACTCACCTCTGGCCTATGGTCATCTCAATGCCGAGAGGGATGTGAAGGGCGAGAGAGCGACT  
TCTCTCGGGCCACAGCCTTACAGCTGTGGAGCACGGTATCCTCTGCCGAAACAGAGGTTGGAC

[illegible]

@A00155:342:HHGFNDSXY:1:1232:18014:1313 1:N:0:GAACCTAG+TCCGCATA  
GAGGGCGAGAGAGAGCGACTTCTCTCGGGCCACAGCCTTACAGCTGTGGAGCACGGTATCCTCTGCC  
GAAACAGAGGTTGGACAAGACCGGAGGGGTCTCTGGTTCCAAAGGAGATGTACTCCGGGCTTGTTCA

```

FFFFFFFFFFFFFFFFFFFFFFFF:FFFFFFFFFFFFFFFFFFFFFFFFFFFFFFFFFFFFFFFFFFFFFFFFFFFFFFFF
FFFFFFFFFFFFFFF,FFFFFFFFFFFFFFF:FFFFFFF:FFFFFFFFFFFFFFFFFFFFFFFFFFFFFFFFFFFFFFFF:FF:FFF

```

@A00155:342:HHGFNDSXY:1:1232:12409:19476 1:N:0:GAACCTAG+TCCGCATA  
ACCTCTGTTTCGGCAGAGGATACCGTGCTCCACAGCTGTAAGGCTGTGGCCCCGAGAGAAGTCGCTCT  
CTCTCGCCCTCCACATCCCTCTCGGCATTGAGATGACCATAGGCCAGAGGAGAGTCCTTAAG

[illegible]

@A00155:342:HHGFNDSXY:1:1232:31105:20353 1:N:0:GAACCTAG+TCCGCATA  
CTTCTCTCGGGCCACAGCCTTACAGCTGTGGAGCACGGTATCCTCTGCCGAAACAGAGGTTGGACAA  
GACCGGAGGGGTCTCCTAGTTCCAAAGGAGATGTACTCCGGGCTTGTTACGACCTACCGTGTAAGTC

[illegible]

FFFFFFFFFFFFFFFFFFFFFFFFFFFFFFFFFFFFFFFFFFFFFFFFFFFFFFFFFFF:FFFFFFFFFFFFFFFFFFFFFFFFFFFFFFFF  
@A00155:342:HHGFNDSXY:1:1232:3839:22576 1:N:0:GAACCTAG+TCCGCATA

GTCATCTCAATGCCGAGAGGGATGTGGAGGGCGAGAGAGCGACTTCTCTCGGGCCACAGCCTTAC  
AGCTGTGGAGCACGGTATCCTCTGCCGAAACAGAGGTTGGACAAGACCGGAGGGGTCTCCTAGTTCCA  
+

```

FFFFFFFFFFFFFFFFFFFFFFFF:FFFFFFFFFFFFFFFFFFFFFFFF,FFFFFFFFFFFFFFFFFFFFFFFFFFFFFFFFFFFFFFFF:FF
FFFFFFFFFFFFFFFFFFFFFFFF:FFFFFFFF,FFFFFFFFFFFFFFFFFFFFFFFF:FFF:FFFFFFFFFFFFFFFFFFFFFFFF

```

@A00155:342:HHGFNDSXY:1:1232:30391:31767 1:N:0:GAACCTAG+TCCGCATA  
AGCGACTTCTCTCGGGCCACAGCCTTACAGCTGTGGAGCACGGTATCCTCTGCCGAAACAGAGGTTG  
GACAAGACCGGAGGGGTCTCCTGGTTCCAAAGGAGATGTACTCCGGGCTTGTTACACGACCTACCGTGT

[illegible]

FFF:FFFFFFFFFFFFFFFFFFFFFFFFFFFFFFFFFFFFFFFFFFFFFFFFFFFFFFFFFFFFFFFFFFFFFFFFFFFFFFFF:FF  
@A00155:342:HHGFNDSXY:1:1233:12726:9909 1:N:0:GAACCTAG+TCCGCATA

CAATGCCGAGAGGGATGTGGAGGGCGAGAGAGAGCGACTTCTCTCGGGCCACAGCCTTACAGCTGTG  
GAGCACGGTATCCTCTGCCGAAACAGAGGTTGGACAAGACCGGAGGGGTCTCCTAGTTCCAAAGGAGA

```

+
FFF,FFFF::FFFFFF,FFFFFFFFFFFFFFFFFFFF,F:F::F:FFF::FFFFFFFF:FF,FFFFFF:F,:

```

```
FF:FFF,FFFFF,:FF,FFFFFFF:FFF:,FFFFFFFFF:FF::FFFF:FFFFFFFFFFFFFFFFF:FF:FFF
@A00155:342:HHGFNDSXY:1:1233:4417:26647 1:N:0:GAACCTAG+TCCGCATA
```

GAGCGACTTCTCTCGGGCCCACAGCCTTACAGCTGTGGAGCACGGTATCCTCTGCCGAAACAGAGGTT  
GGACAAGACCGGAGGGGTCTCCTAGTTCAAAAGAGATGTACTCCGGGCTTGTTACGACCTACCGTG  
+

[illegible]

@A00155:342:HHGFNDSXY:1:1234:18656:28416 1:N:0:GAACCTAG+TCCGCATA  
ATCTCAATGCCGAGAGGGATGTGGAGGGCGAGAGAGAGCGACTTCTCTCGGGCCCACAGCCTTACAGC

TGTGGAGCACGGTATCCTCTGCCGAAACAGAGGTTGGACAAGACCGGAGGGGTCTCCTGGTTCCAAAG  
+

[illegible]

```
GAGAGGGATGTGGAGGGCGAGAGAGACGACTTCTCTCGGGCCACAGCCTTACAGCTGTGGAGCACG  
GTATCCTCTGCCGAAACAGAGGTTGGACAAGACCGAGGGGTCTCCTAGTTCAAAGGAGATGTACTC  
+  
FFFFFFFFFFFFFFFFFFFFFFFFFFFFFFFFFFFFFFFFFFFFFFFFFFFFFFFFFFFFFFFFFFFFFFFFFFFFF  
FFFFFFFFFFFFFFFFFFFFFFFFFFFFFFFFFFFFFFFFFFFFFFFFFFFFFFFFFFFFFFFFFFFFFFFFFFFFF  
@A00155:342:HHGFNDSXY:1:1235:1696:4272 1:N:0:GAACCTAG+TCCGCATA  
TTAAGGACTCACCTCTGGCCTATGGTCATCTCAATGCCGAGAGGGATGTGAAGGGCGAGAGAGAGCGA  
CTTCTCTCGGGCCACAGCCTTACAGCTGTGGAGCACGGTATCCTCTGCCGAAACAGAGGTTGGACAA  
+  
FFFFFFFFFFFFFFF,FFFFFFFFFFFFFFFFFFFFFFFF,F:FF,,FFF:FFFF:FFFFFFFFFFFFFFFFF  
FFFFFFFFF:FFFFFFFFFFFFFFFF:FFFF,FFFFFFFFF:F,FFFFFFFF:FFFFF:FF,F,FF  
@A00155:342:HHGFNDSXY:1:1235:20491:13808 1:N:0:GAACCTAG+TCCGCATA  
TCCTCTGCCGAAACAGAGGTTGGACAAGACCGGAGGGGTCTCCTGGTTCCAAAGGAGATGTACTCCGG  
GCTTGTTACAGACCTACCGTGTAAGTCGTAGTCTAGTAGGCTACCTGACGAGTCCTTTTTAGGACGAA  
+  
FFFFFFFFFFFFFFFFFFFFFFFFFFFFFFFFFFFFFFFFFFFFFFFFFFFFFFFFFFFFFFFFFFFFFFFFFFFFF  
FFFFFFFFFFFFFFFFFFFFFFFFFFFFFFFFFFFFFFFFFFFFFFFFFFFFFFFFFFFFFFFFFFFFFFFFFFFFF  
@A00155:342:HHGFNDSXY:1:1235:12952:28275 1:N:0:GAACCTAG+TCCGCATA  
CACCTCTGGCCTATGGTCATCTCAATGCCGAGAGGGATGTGAAGGGCGAGAGAGAGCGACTTCTCTCG  
GGCCACAGCCTTACAGCTGTGGAGCACGGTATCCTCTGCCGAAACAGAGGTTGGACAAGACCGGAGG  
+  
FFFFFFF:FFFFFFFFFFFFFFFFFFFFFFFFFFFFFFFFFFFFFFFFFFFFFFFFFFFFFFFFFFFFFFFFFFFFF  
FFFFFFF:FFFFFFFFFFFFFFFFFFFFFFFFFFFFFFFFFFFFFFFFFFFFFFFFFFFFFFFFFFFFFFFFFFFFF  
@A00155:342:HHGFNDSXY:1:1236:16866:4836 1:N:0:GAACCTAG+TCCGCATA  
GCCACAGCCTTACAGCTGTGGAGCACGGTATCCTCTGCCGAAACAGAGGTTGGACAAGACCGGAGGG  
GTCTCCTAGTTCAAAGGAGATGTACTCCGGGCTTGTTACAGACCTACCGTGTAAGTCGTAGTCTAGT  
+  
FFFFFFFFFFFFF:FFFFFFFFFFFFFFFFFFFFFFFFFFFFFFFFFFFFFFFFFFFFFFFFFFFFFFFFFFFFFFFFF  
FFFFFFFFFFFFFFFFFFFFFFFFFFFFFFFFFFFFFFFFFFFFFFFFFFFFFFFFFFFFFFFFFFFFFFFFFFFFF  
@A00155:342:HHGFNDSXY:1:1236:28040:25567 1:N:0:GAACCTAG+TCCGCATA  
ACTTCTCTCGGGCCACAGCCTTACAGCTGTGGAGCACGGTATCCTCTGCCGAAACAGAGGTTGGACA  
AGACCGGAGGGGTCTCCTAGTACCAAAGGAGATGTACTCCGGGCTTGTTACAGACCTACCGTGTAAGT  
+  
FFFFFFFFFFFFFFFFFFFFFFFFFFFFFFFFFFFFFFFFFFFFFFFFFFFFFFFFFFFFFFFFFFFFFFFFFFFFF  
FFFFFFFFFFFFFFFFFFFFFFFFFFFFFFFFFFFFFFFFFFFFFFFFFFFFFFFFFFFFFFFFFFFFFFFFFFFFF  
@A00155:342:HHGFNDSXY:1:1237:15655:16329 1:N:0:GAACCTAG+TCCGCATA  
CTGTGTCCAATTAAAGACTCACCTCTGGCCTATGGTCATCTCAATGCCGAGAGGGATGTAGAGGGCGA  
GAGAGAGCGACTTCTCTCGGGCCACAGCCTTACAGCTGTGGAGCACGGTATCCTCTGCCGAAACAGA  
+  
FFFFFFFFFFFFFFFFFFFFFFFFFFFFFFFFFFFFFFFFFFFFFFFFFFFFFFFFFFFFFFFFFFFFFFFFFFFFF  
FFFFFFFFFFFFFFFFFFFFFFFFFFFFFFFFFFFFFFFFFFFFFFFFFFFFFFFFFFFFFFFFFFFFFFFFFFFFF  
@A00155:342:HHGFNDSXY:1:1237:3088:27665 1:N:0:GAACCTAG+TCCGCATA  
TGCCGAGAGGGATGTGGAGGGCGAGAGAGAGCGACTTCTCTCGGGCCACAGCCTTACAGCTGTGGAG  
CACGGTATCCTCTGCCGAAACAGAGGTTGGACAAGACCGGAGGGGTCTCCTAGTTCAAAGGAGATGT  
+  
FFFFFFFFFFFFFFFFFFFFFFFFFFFFFFFFFFFFFFFFFFFFFFFFFFFFFFFFFFFFFFFFFFFFFFFFFFFFF  
FFFFFFFFFFFFFFFFFFFFFFFFFFFFFFFFFFFFFFFFFFFFFFFFFFFFFFFFFFFFFFFFFFFFFFFFFFFFF  
@A00155:342:HHGFNDSXY:1:1237:17626:31548 1:N:0:GAACCTAG+TCCGCATA  
GAGGGCGAGAGAGAGCGACTTCTCTCGGGCCACAGCCTTACAGCTGTGGAGCACGGTATCCTCTGCC  
GAAACAGAGGTTGGACAAGACCGGAGGGGTCTCCTAGTTCAAAGGAGATGTACTCCGGGCTTGTTCA  
+  
FFFFFFFFFFFFFFFFFFFFFFFFFFFFFFFFFFFFFFFFFFFFFFFFFFFFFFFFFFFFFFFFFFFFFFFFFFFFF  
FFFFFFFFFFFFFFFFFFFFFFFFFFFFFFFFFFFFFFFFFFFFFFFFFFFFFFFFFFFFFFFFFFFFFFFFFFFFF  
@A00155:342:HHGFNDSXY:1:1237:17626:31548 1:N:0:GAACCTAG+TCCGCATA  
GAGGGCGAGAGAGAGCGACTTCTCTCGGGCCACAGCCTTACAGCTGTGGAGCACGGTATCCTCTGCC  
GAAACAGAGGTTGGACAAGACCGGAGGGGTCTCCTAGTTCAAAGGAGATGTACTCCGGGCTTGTTCA  
+
```



[illegible]

$+$ 

@A00155:342:HHGFNDSXY:1:1240:17427:34021 1:N:0:GAACCTAG+TCCGCATA  
GACTTCTCTCGGGCCACAGCCTTACAGCTGTGGAGCACGGTATCCTCTGCCGAAACAGAGGTTGGAC  
AAGACCGGAGGGGTCTCCTAGTTCCAAAGGAGATGTACTCCGGGCTTGTTACGACCTACCGTGTAAG

+

@A00155:342:HHGFNDSXY:1:1241:6361:3114 1:N:0:GAACCTAG+TCCGCATA  
GAGGGCGAGAGAGAGCGACTTCTCTCGGGCCACAGCCTTACAGCTGTGGAGCACGGTATCCTCTGCC  
GAAACAGAGGTTGGACAAGACCGGAGGGGTCTCCTAGTTCCAAAGGAGATGTACTCCGGGCTTGTTCA

+

@A00155:342:HHGFNDSXY:1:1241:27416:11365 1:N:0:GAACCTAG+TCCGCATA  
GGATGTGGAGGGCGAGAGAGAGCGACTTCTCTCGGGCCACAGCCTTACAGCTGTGGAGCACGGTATC  
CTCTGCCGAAACAGAGGTTGGACAAGACCGGAGGGGTCTCCTAGTTCCAAAGGAGATGTACTCC

+

@A00155:342:HHGFNDSXY:1:1241:9661:33379 1:N:0:GAACCTAG+TCCGCATA  
GACTTCTCTCGGGCCACAGCCTTACAGCTGTGGAGCACGGTATCCTCTGCCGAAACAGAGGTTGGAC  
AAGACCGGAGGGGTCTCCTAGTTCCAAAGGAGATGTACTCCGGGCTTGTTACGACCTACCGTGTAAG

+

@A00155:342:HHGFNDSXY:1:1242:6271:1141 1:N:0:GAACCTAG+TCCGCATA  
CCATGCCCCGCCACACCGCCTTAGATCAGCTGTGTCCACTTAAGGACTCACCTCTGGCCTATGGTCAT  
CTCAATGCCGAGAGGGGATGTGGAGGGCGAGAGAGAGCGACTTCTCTCGGGCCCCACAGCCTTACAGCTG

+

@A00155:342:HHGFNDSXY:1:1242:6207:28025 1:N:0:GAACCTAG+TCCGCATA  
AGAGAGCGACTTCTCTCGGGCCACAGCCTTACAGCTGTGGAGCACGGTATCCTCTGCCGAAACAGAG  
GTTGGACAAGACCGGAGGGGTCTCTAGTTCCAAAGGAGATGTACTCCGGGCTTGTTACGACCTACC

 $+$ 

@A00155:342:HHGFNDSXY:1:1243:31855:10347 1:N:0:GAACCTAG+TCCGCATA  
CCATGCCCCGCCACACCGCCTTAGATCAGCTGTGTCCACTTAAGGACTCACCTCTGGCCTATGGTCAT  
CTCAATGCCGAGAGGGGATGTGGAGGGCGAGAGAGAGCGACTTCTCTCGGGGCGACAGCCTTACAGCTG

+

@A00155:342:HHGFNDSXY:1:1243:8748:19272 1:N:0:GAACCTAG+TCCGCATA  
AGAGAGAGCGACTTCTCTCGGGCCACAGCCTTACAGCTGTGGAGCACGGTATCCTCTGCCGAAACAG  
AGGTTGGACAAGACCGGAGGGGTCTCCTAGTTCCAAAGGAGATGTACTCCGGGCTTGTTTCACGACC

+

```

FFFFFFFFFFFFFFFFFFFFFFFFFFFFFFFFFFFFFFFF:FFFFFFFFFFFFFF:FFFFFFFFFFFF:FFFFFFFFFFFFFF
FFFFFFFFFFFFFFFFFFFFFFFFFFFFFFFFFFFFFFFF.FFFF.FFFFFFFFFFFFFFFFFFFFFFFFFFFFFFFFF.FFFFFFFFFF.

```

@A00155:342:HHGFNDSXY:1:1243:18611:20384 1:N:0:GAACCTAG+TCCGCATA  
AGACTCCGACCGTCATGGGGTTCAAACCATGCCACCACACCGCCTTAGATCAGCTGTGTCCACT  
TAAGGACTCACCTCTGGCCTATGGTCATCTCAATGCCGAGAGGGATGTGGAGGGCGAGAGAGAGCGAC  
+  
FFFFFFFFFFFFFFF:FFFFFFFFFFFFFFFFFFFFFFFFFFFFFFFFFFFFFFFFFFFFFFFFFFFFFFFFFFFF  
FFFFF:FFFFFFFFFFFFFFFFFFFFFF:FFFFFFFFFFFFFFFFFFFFFF:FFFFFFFFFFFFFFFFFFFFFF  
@A00155:342:HHGFNDSXY:1:1243:29451:30514 1:N:0:GAACCTAG+TCCGCATA  
AGAGAGAGCGACTTCTCTCGGGCCCACAGCCTTACAGCTGTGGAGCACGGTATCCTCTGCCGAAACAG  
AGGTTGGACAAGACCGGAGGGGTCTCCTAGTTCCAAAGGAGATGTACTCCGGGCTTGTTACGACCTA  
+  
FFFFFFFFFFFFFFFFFFFFFFFFFFFFFFFFFFFFFFFFFFFFFFFFFFFFFFFFFFFFFFFF:FFFFFFFFFFFF  
FFFFFFFFFFFFFFFFFFFFFFFFFFFFFFFFFFFFFFFFFFFFFFFFFFFFFFFFFFFFFFFFFFFFFFFFFFFF  
@A00155:342:HHGFNDSXY:1:1244:26856:6167 1:N:0:GAACCTAG+TCCGCATA  
CTTCTCTCGGGCCCACAGCCTTACAGCTGTGGAGCACGGTATCCTCTGCCGAAACAGAGGTTGGACAA  
GACCGGAGGGGTCTCCTGGTTCCAAAGGAGATGTACTCCGGGCTTGTTACGACCTACCGTGTAAGTC  
+  
FFFFFFFFFFFFFFFFFFFFFFFFFFFFFFFFFFFFFFFFFFFFFFFFFFFFFFFFFFFFFFFFFFFFFFFFFFFF  
FFFFFFFFFFFFFFFFFFFFFFFFFFFFFFFFFFFFFFFFFFFFFFFFFFFFFFFFFFFFFFFFFFFFFFFFFFFF  
@A00155:342:HHGFNDSXY:1:1244:20998:8422 1:N:0:GAACCTAG+TCCGCATA  
GAGGGCGAGAGAGAGCGACTTCTCTCGGGCCCACAGCCTTACAGCTGTGGAGCACGGTATCCTCTGCC  
GAAACAGAGGTTGGACAAGACCGGAGGGGTCTCCTGGTTCCAAAGGAGATGTACTCCGGGCTTGTTCA  
+  
FFFFF:FFFFFFFFF::FFFFFFFFFFFF:FFFFFFFFFFF,FFF:FFFFFFFFFFFF:F::F::FFF:FF  
FFFFFFFFFFFFFFFFFFFF:FFFFFFFFFFFFFFFFFFFFFFFFFFFFFFFFFFFFFFFFFFFFF:FFFFFFFFFFFFF:FF  
@A00155:342:HHGFNDSXY:1:1244:32931:10300 1:N:0:GAACCTAG+TCCGCATA  
CTTCTCTCGGGCCCACAGCCTTACAGCTGTGGAGCACGGTATCCTCTGCCGAAACAGAGGTTGGACAA  
GACCGGAGGGGTCTCCTAGTTCCAAAGGAGATGTACTCCGGGCTTGTTACGACCTACCGTGTAAGTC  
+  
FFFFFFFFFFFFFFFFFFFFFFFFFFFFFFFFFFFFFFFFFFFFFFFFFFFFFFFFFFFFFFFFFFFFFFFFFFFF  
FFF:FFFFFFFFFFFFFFFFFFFFFFFFFFFFFFFFFFFF:FFFFFFFFFFFFFFFFF:FFFFFFFFFFFFFFFFFFFF  
@A00155:342:HHGFNDSXY:1:1244:5846:33536 1:N:0:GAACCTAG+TCCGCATA  
GAGCGACTTCTCTCGGGCCCACAGCCTTACAGCTGTGGAGCACGGTATCCTCTGCCGAAACAGAGGTT  
GGACAAGACCGGAGGGGTCTCCTGGTTCCAAAGGAGATGTACTCCGGGCTTGTTACGACCTACCGTG  
+  
FFFFFFFFFFFFFFFFFFFFFFFFFFFFFFFFFFFFFFFFFFFFFFFFFFFFFFFFFFFFFFFFFFFFFFFFFFFF  
FFFFFFFFFFFFFFFFFFFFFFFFFFFFFFFFFFFFFFFFFFFFFFFFFFFFFFFFFFFFFFFFFFFFFFFFFFFF  
@A00155:342:HHGFNDSXY:1:1245:22788:4319 1:N:0:GAACCTAG+TCCGCATA  
ATCTCAATGCCGAGAGGGATGTGGAGGGCGAGAGAGAGCGACTTCTCTCGGGCCCACAGCCTTACAGC  
TGTGGAGCACGGTATCCTCTGCCGAAACAGAGGTTGGACAAGACCGGAGGGGTCTCCTAGTTCCAAAG  
+  
FFFFFFFFFFFFFFFFFFFFFFFFFFFFFFFFFFFFFFFFFFFFFFFFFFFFFFFFFFFFFFFFFFFFFFFFFFFF  
FFFFFFFFFFFFFFFFFFFFFFFFFFFFFFFFFFFFFFFFFFFFFFFFFFFFFFFFFFFFFFFFFFFFFFFFFFFF:  
@A00155:342:HHGFNDSXY:1:1245:14018:8015 1:N:0:GAACCTAG+TCCGCATA  
CTCAATGCCGAGAGGGATGTGGAGGGCGAGAGAGAGCGACTTCTCTCGGGCCCACAGCCTTACAGCTG  
TGGAGCACGGTATCCTCTGCCGAAACAGAGGTTGGACAAGACCGGAGGGGTCTCCTGGTTCCAAAGGA  
+  
FFFFFFFFFFFFFFFFFFFFFFFFFFFF,FFFFFFFFFFFFFFFFFFFFFFFFFFFFFFFFFFFFFFFFFFFFFFFFFFFF  
FFFFFFFFFFFFFFFFFFFFFFFFFFFFFFFFFFFFFFFFFFFFFFFFFFFFFFFFFFFFFFFFFFFFFFFFFFFF:  
@A00155:342:HHGFNDSXY:1:1245:21558:27054 1:N:0:GAACCTAG+TCCGCATA  
AGAGAGAGCGACTTCTCTCGGGCCCACAGCCTTACAGCTGTGGAGCACGGTATCCTCTGCCGAAACAG  
AGGTTGGACAAGACCGGAGGGGTCTCCTAGTTCCAAAGGAGATGTACTCCGGGCTTGTTACGACCTA  
+  
FFFFFFFFFFFFFFFFFFFFFFFFFFFFFFFFFFFFFFFFFFFFFFFFFFFFFFFFFFFFFFFFFFFFFFFFFFFF  
FFFFFFFFFFFFFFFFFFFFFFFFFFFFFFFFFFFFFFFFFFFFFFFFFFFFFFFFFFFFFFFFFFFFFFFFFFFF:  
@A00155:342:HHGFNDSXY:1:1245:21558:27054 1:N:0:GAACCTAG+TCCGCATA  
AGAGAGAGCGACTTCTCTCGGGCCCACAGCCTTACAGCTGTGGAGCACGGTATCCTCTGCCGAAACAG  
AGGTTGGACAAGACCGGAGGGGTCTCCTAGTTCCAAAGGAGATGTACTCCGGGCTTGTTACGACCTA  
+



@A00155:342:HHGFNDSXY:1:1248:19497:35321 1:N:0:GAACCTAG+TCCGCATA  
ATCTCAATGCCGAGAGGGATGTGGAGGGCGAGAGAGAGCGACTTCTCTCGGGCCCACAGCCTTACAGC  
TGTGGAGCACGGTATCCTCTGCCGAAACAGAGGTTGGACAAGACCGGAGGGGTCTCCTAGTTCAAAG  
+  
FFFFFFFFFFFF,FFFFFFFFFFFFFFFFFFFFFFFFFFFFFFFFFFFFFFFFFFFFFFFFFFFFFFFFFFFFFFF,FFFFF,F  
FFFFFFFF:FFF,FFFFFFFF:FFFFFFFF::FFFF::FF:FF:FFFFFFFF,FFFFFFFFFFFF:FFFFFFF  
@A00155:342:HHGFNDSXY:1:1249:27046:15922 1:N:0:GAACCTAG+TCCGCATA  
CGAGAGAGAGCGACTTCTCTCGGGCCCCACAGCCTTACAGCTGTGGAGCACGGTATCCTCTGCCGAAAC  
AGAGGTTGGACAAGACCGGAGGGGTCTCCTAGTTCAAAGGAGATGTACTCCGGGCTTGTTACAGACC  
+  
FFFFFFFFFFFFFFFFFFFFFFFFFFFFFFFFFFFFFFFFFFFFFFFFFFFFFFFFFFFFFFFFFFFFFFFFFFFFF  
FFFFFFFFFFFFFFFFFFFFFFFFFFFFFFFFFFFFFFFFFFFFFFFFFFFFFFFFFFFFFFFFFFFFFFFFFFFFF  
@A00155:342:HHGFNDSXY:1:1249:22299:20415 1:N:0:GAACCTAG+TCCGCATA  
TATGGTCATCTCAATGCCGAGAGGGATGTGGAGGGCGAGAGAGAGCGACTTCTCTCGGGCCCACAGCC  
TTACAGCTGTGGAGCACGGTATCCTCTGCCGAAACAGAGGTTGGACAAGACCGGAGGGGTCTCCTAGT  
+  
FFFFFFFFFFFFFFFFFFFFFFFFFFFFFFFFFFFFFFFFFFFFFFFFFFFFFFFFFFFFFFFFFFFFFFFFFFFFF  
,FFFFFFFFFFFFFFFFFFFFFFFFFFFFFFFFFFFFFFFFFFFFFFFFFFFFFFFFFFFFFFFFFFFFFFFFFFFFF  
@A00155:342:HHGFNDSXY:1:1249:8006:26036 1:N:0:GAACCTAG+TCCGCATA  
GATGTGGAGGGCGAGAGAGAGCGACTTCTCTCGGGCCCCACAGCCTTACAGCTGTGGAGCACGGTATCC  
TCTGCCGAAACAGAGGTTGGACAAGACCGGAGGGGTCTCCTAGTTCAAAGGAGATGTACTCCGGGCT  
+  
FFFFFFFFFFFFFFFFFFFFFFFFFFFFFFFFFFFFFFFFFFFFFFFFFFFFFFFFFFFFFFFFFFFFFFFFFFFFF  
FFFFFFFFFFFFFFFFFFFFFFFFFFFFFFFFFFFFFFFFFFFFFFFFFFFFFFFFFFFFFFFFFFFFFFFFFFFFF  
@A00155:342:HHGFNDSXY:1:1249:28330:33458 1:N:0:GAACCTAG+TCCGCATA  
ATAGGCCAGAGGTGAGTCCTTAAGTGGACACAGCTGATCTAAGCGGTTGGCGGGGCATGGGTTTGA  
ACCCCATGACGGTCGGAGTCTAGTAGGCTCCCTGATGAGTCCGTTCCAAGGACGAAACCGTCGTTAC  
+  
FFFFFFFF:FFF:FFFFFFFFFFFFFFFFFFFFFFFFFFFFFFFFFFFFFFFFFFFFFFFFFFFFFFFFFFFFF,  
FFFFFFFF:FFFFFFFFFFFF, ,FFFFFFFFFFFFFFFFFFFFFFFFFFFFFFFFFFFFFFFFFFFFFFFFFFFFF  
@A00155:342:HHGFNDSXY:1:1249:26964:35571 1:N:0:GAACCTAG+TCCGCATA  
AGCGACTTCTCTCGGGCCCACAGCCTTACAGCTGTGGAGCACGGTATCCTCTGCCGAAACAGAGGTTG  
GACAAGACCGGAGGGGTCTCCTGGTTCAAAGGAGATGTACTCCGGGCTTGTTACAGACCTACCGTGT  
+  
FFFFFFFFFFFFFFFFFFFFFFFFFFFFFFFFFFFFFFFFFFFFFFFFFFFFFFFFFFFFFFFFFFFFFFFFFFFFF  
FFFFFFFFFFFFFFFFFFFFFFFFFFFFFFFFFFFFFFFFFFFFFFFFFFFFFFFFFFFFFFFFFFFFFFFFFFFFF  
@A00155:342:HHGFNDSXY:1:1250:32985:2973 1:N:0:GAACCTAG+TCCGCATA  
CTATGGTCATCTCAATGCCGAGAGGGAGGTGGAGGGCGAGAGAGAGCGACTTCTCTCGGGCCCACAGC  
CTTACAGCTGTGGAGCACGGTATCCTCTGCCGAAACAGAGGTTGGACAAGACCGGAGGGGTCTCCTAG  
+  
FF:FFFFFFFFFFFFFFFFFFFFFFFFFFFFFFFFFFFFFFFFFFFFFFFFFFFFFFFFFFFFFFFFFFFFFFFFF,  
FFF:F,FFFFFFFFFFFFFFFFFFFFFFFFFFFFFFFFFFFFFFFFFFFFFFFFFFFFFFFFFFFFFFFFFFFFF,FFF,F:  
@A00155:342:HHGFNDSXY:1:1250:29640:8108 1:N:0:GAACCTAG+TCCGCATA  
TGCCGAGAGGGATGTGGAGGGCGAGAGAGAGCGACTTCTCTCGGGCCCACAGCCTTACAGCTGTGGAG  
CACGGTATCCTCTGCCGAAACAGAGGTTGGACAAGACCGGAGGGGTCTCCTAGTTCAAAGGAGATGT  
+  
FFFFFFFFFFFFFFFF:FFFFFFFFF:FFFFFFFFFFFFFFFFFFFFFFFFFFFFFFFFFFFFFFFFFFFFFFFFFFFFF  
FFFFFFFFFFFFFFFFFFFFFFFFFFFFFFFFFFFFFFFFFFFFFFFFFFFFFFFFFFFFFFFFFFFFFFFFFFFFF  
@A00155:342:HHGFNDSXY:1:1250:30553:27915 1:N:0:GAACCTAG+TCCGCATA  
GGGCGAGAGAGAGCGACTTCTCTCGGGCCCACAGCCTTACAGCTGTGGAGCACGGTATCCTCTGCCGA  
AACAGAGGTTGGACAAGACCGGAGGGGTCTCCTAGTTCAAAGGAGATGTACTCCGGGCTTGTTACAG  
+  
FFFFFFFFFFFFFFFFFFFFFFFFFFFFFFFFFFFFFFFFFFFFFFFFFFFFFFFFFFFFFFFFFFFFFFFFFFFFF  
FFFFFFFFFFFFFFFFFFFFFFFFFFFFFFFFFFFFFFFFFFFFFFFFFFFFFFFFFFFFFFFFFFFFFFFFFFFFF  
@A00155:342:HHGFNDSXY:1:1250:30553:27915 1:N:0:GAACCTAG+TCCGCATA  
GGGCGAGAGAGAGCGACTTCTCTCGGGCCCACAGCCTTACAGCTGTGGAGCACGGTATCCTCTGCCGA  
AACAGAGGTTGGACAAGACCGGAGGGGTCTCCTAGTTCAAAGGAGATGTACTCCGGGCTTGTTACAG

[illegible]

@A00155:342:HHGFNDSXY:1:1253:9317:12117 1:N:0:GAACCTAG+TCCGCATA  
GGACTCACCTCTGGCCTATGGTCATCTCAATGCCGAGAGGGATGTGAAGGGCGAGAGAGAGCGACTTC  
TCTCGGGCCACAGCCTTACAGCTGTGGAGCACGGTATCCTCTGCC

@A00155:342:HHGFNDSXY:1:1253:4589:27571 1:N:0:GAACCTAG+TCCGCATA  
CTCTCGGGCCACAGCCTTACAGCTGTGGAGCACGGTATCCTCTGCCGAAACAGAGGTTGGACAAGAC  
CGGAGGGGTCTCCTAGTTCCAAAGGAGATGTACTCCGGGCTTGTTACGACCTACCGTGTAAGTCGTA

@A00155:342:HHGFNDSXY:1:1254:5873:20776 1:N:0:GAACCTAG+TCCGCATA  
GCGACTTCTCTCGGGCCACAGCCTTACTGCTGTGGAGCACGGTATCCTCTGCCGAAACAGAGGTTGG  
ACAAGACCGGAGGGGTCTCCTAGTTCCAAAGGAGATGTACTCCGGGCTTGTTACGACCTACCGTGTA

@A00155:342:HHGFNDSXY:1:1255:1922:3724 1:N:0:GAACCTAG+TCCGCATA  
GAGCGACTTCTCTCGGGCCCACAGCCTTACAGCTGTGGAGCACGTTATCCTCTGCCGAAACAGAGGTT  
GGACAAGACCGGAGGGGTCTCCTAGTTCAAAGGAGATGTACTCCGGGCTTGTTACGACCTACCGTG

@A00155:342:HHGFNDSXY:1:1255:2220:6840 1:N:0:GAACCTAG+TCCGCATA  
GGATGTGGAGGGCGAGAGAGAGCGACTTCTCTCGGGCCACAGCCTTACAGCTGTGGAGCACGGTATC  
CTCTGCCGTAACAGAGGTTGGACAAGACCGGAGGGGTCTCCTAGTTCCAAAGGAGATGTACTCC

@A00155:342:HHGFNDSXY:1:1255:4544:15687 1:N:0:GAACCTAG+TCCGCATA  
CAATGCCGAGAGGGATGTAGAGGGCGAGAGAGCGACTTCTCTCGGGCCCACAGCCTTACAGCTGTG  
GAGCACGGTATCCTCTGCCGAAACAGAGGTTGGACAAGACCGGAGGGGTCTCCTAGTTCAAAGGAGA

@A00155:342:HHGFNDSXY:1:1255:2871:16892 1:N:0:GAACCTAG+TCCGCATA  
GAGCGACTTCTCTCGGGCCCACAGCCTTACAGCTGTGGAGCACGGTATCCTCTGCCGAAACAGAGGTT  
GGACAAGACCGGAGGGGTCTCCTAGATCCAAAGGAGATGTACTCCGGGCTTGTTACGACCTACCGTG

@A00155:342:HHGFNDSXY:1:1255:2193:33818 1:N:0:GAACCTAG+TCCGCATA  
TTCTCTCGGGCCACAGCCTTACAGCTGTGGAGCACGGTATCCTCTGCCGAAACAGAGGTTGGACAAG  
ACCGGAGGGGTCTCCTAGTTCCAAAGGAGATGTACTCCGGGCTTGTTACGACCTACCGTGTAAGTCG

@A00155:342:HHGFNDSXY:1:1258:23421:11992 1:N:0:GAACCTAG+TCCGCATA  
GGATGTGGAGGGCGAGAGAGAGCGACTTCTCTCGGGCCACAGCCTTACAGCTGTGGAGCACGGTATC  
CTCTGCCGAAACAGAGGTTGGACAAGACCGGAGGGGTCTCCTGGTTCCAAAGGAGATGTACTCC

[illegible]



[illegible]

[illegible]

@A00155:342:HHGFNDSXY:1:1266:16260:2597 1:N:0:GAACCTAG+TCCGCATA  
AGAGAGAGCGACTTCTCTCGGGCCCACAGCCTTACAGCTGTGGAGCACGGTATCCTCTGCCGAAACAG  
AGGTTGGACAAGACCGGAGGGGTCTCCTGGTTCCAAAGGAGATGTACTCCGGGCTTGTTACGACCTA  
+  
FFFFFFFFFFFFFFFF:FFFFFFFF:FFFFFFFFFFFFFFFFFFFFFFFFFFFFFFFF:FFFFFFFFFFFFFFFFFFFFFFFF  
FFFFFFFFFFFFFFFF:FFFFFFFFFFFFFFFFFFFFFFFFFFFFFFFFFFFFFFFFFFFFFFFFFFFFFFFFFFFFFFFF  
@A00155:342:HHGFNDSXY:1:1266:16423:2973 1:N:0:GAACCTAG+TCCGCATA  
AGAGAGAGCGACTTCTCTCGGGCCCACAGCCTTACAGCTGTGGAGCACGGTATCCTCTGCCGAAACAG  
AGGTTGGACAAGACCGGAGGGGTCTCCTGGTTCCAAAGGAGATGTACTCCGGGCTTGTTACGACCT  
+  
FFFFFFFFFFFFFFFFFFFFFFFFFFFFFFFFFFFFFFFFFFFFFFFFFFFFFFFFFFFFFFFF:FFFFFFFFFFFFFFF:FFF  
FFFFFFFFFFFFFFFFFFFFFFFFFFFFFFFFFFFFFFFFFFFFFFFFFFFFFFFFFFFFFFFFFFFFFFFFFFFFFFFF  
@A00155:342:HHGFNDSXY:1:1266:7798:22827 1:N:0:GAACCTAG+TCCGCATA  
GTCATCTCAATGCCGAGAGGGATGTGGAGGGCGAGAGAGAGCGACTTCTCTCGGGCCCACAGCCTTAC  
AGCTGTGGAGCACGGTATCCTCTGCCGAAACAGAGGTTGGACAAGACCGGAGGGGTCTCCTAGTTCCA  
+  
FFFFFFFFFFFFFFFFFFFFFFFFFFFFFFFFFFFFFFFFFFFFFFFFFFFFFFFFFFFFFFFF:FFFFFFFFFFFFFFF:FFF  
FFFFFFFFFFFFFFFFFFFFFFFFFFFFFFFFFFFFFFFFFFFFFFFFFFFFFFFFFFFFFFFFFFFFFFFFFFFFFFFF  
@A00155:342:HHGFNDSXY:1:1267:10465:9502 1:N:0:GAACCTAG+TCCGCATA  
TTACAGCTGTGGAGCACGGTATCCTCTGCCGAAACAGAGGTTGGACAAGACCGGAGGGGTCTCCTAGT  
TCCAAAGGAGATGTACTCCGGGCTTGTTACGACCTACCGTGTAAGTCGTAGTCTAGTAGGCTACCTG  
+  
:FFFFFFFF,FFFFFFFFF:FFFFFFFF:FFFFFFFFFFFFFFFF: ,FFFFFF:FFFFFFFFFFFFFFFFFFFFFFFF  
FFF:FFFFFFFFFFFF,FFF: :FFFFFFFFFFFFFFFFFFFFFFFFFFFFFFFF:FFF:FFFFFFFFFFFF:FFFFFF  
@A00155:342:HHGFNDSXY:1:1267:16197:35837 1:N:0:GAACCTAG+TCCGCATA  
GCGAGAGAGAGCGACTTCTCTCGGGCCCACAGCCTTACAGCTGTGGAGCACGGTATCCTCTGCCGAAA  
CAGAGTTGGACAAGACCGGAGGGGTCTCCTAGTTCCAAAGGAGATGTACTCCGGGCTTGTTACGAC  
+  
F:FFFFFFFFFFFFFFFFFFFFFFFFFFFFFFFFFFFFFFFFFFFFFFFFFFFFFFFFFFFFFFFF,FFFFFFFFFFFFFFFF  
FF:FFFF:FFFFFFFFFFFFFFFFFFFFFFFFFFFFFFFFFFFFFFFFFFFFFFFFFFFFFFFFFFFFFFFF,FFFFFF  
@A00155:342:HHGFNDSXY:1:1268:11993:4413 1:N:0:GAACCTAG+TCCGCATA  
GAGGGCGAGAGAGAGCGACTTCTCTCGGGCCCACAGCCTTACAGCTGTGGAGCACGGTATCCTCTGCC  
GAAACAGAGGTTGGACAAGACCGGAGGGGTCTCCTGGTTCCAAAGGAGATGTACTCCGGGCTTGTTCA  
+  
FFFFFFFFFFFFFFFFFFFFFFFFFFFFFFFFFFFFFFFFFFFFFFFFFFFFFFFFFFFFFFFF:FFFFFFFFFFFFFFF:FFFFFFFF  
FFFFFFFFFFFFFFFFFFFFFFFF:FFFFFFFFFFFFFFFFFFFFFFFFFFFFFFFFFFFFFFFFFFFFFFFFFFFFFFFF:  
@A00155:342:HHGFNDSXY:1:1268:12735:11678 1:N:0:GAACCTAG+TCCGCATA  
GGATGTGGAGGGCGAGAGAGAGCGACTTCTCTCGGGCCCACAGCCTTACAGCTGTGGAGCACGGTATC  
CTCTGCCGAAACAGAGGTTGGACAAGACCGGAGGGGTCTCCTGGTTCCAAAGGAGATGTACTCC  
+  
FFFFFFFFFFFFFFFFFFFFFFFFFFFFFFFFFFFFFFFFFFFFFFFFFFFFFFFFFFFFFFFFFFFFFFFFFFFFFFFF  
FFFFFFFFFFFFFFFFFFFFFFFFFFFFFFFFFFFFFFFFFFFFFFFFFFFFFFFFFFFFFFFFFFFFFFFFFFFFFFFF  
@A00155:342:HHGFNDSXY:1:1268:13024:18161 1:N:0:GAACCTAG+TCCGCATA  
CTCAATGCCGAGAGGGATGTGGAGGGCGAGAGAGAGCGACTTCTCTCGGGCCCACAGCCTTACAGCTG  
TGGAGCACGGTATCCTCTGCCGAAACAGAGGTTGGACAAGACCGGAGGGGTCTCCTAGTTCCAAAGGA  
+  
FFFFFFFFFFFFFFFFFFFFFFF:FFFFFFFFFFFFFFFFFFFFFFFFFFFFFFFF:FFFFFFFFFFFFFFFFFFFFFFFF  
FFFFFFFFFFFFFFFFFFFFFFFFFFFFFFFFFFFFFFFFFFFFFFFFFFFFFFFFFFFFFFFFFFFFFFFFFFFFFFFF  
@A00155:342:HHGFNDSXY:1:1268:13367:19539 1:N:0:GAACCTAG+TCCGCATA  
TCCTCTGCCGAAACAGAGGTTGGACAAGACCGGAGGGGTCTCCTAGTTCCAAAGGAGATGTACTCCGG  
GCTTGTTACGACCTACCGTGTAAGTCGTAGTCTAGTAGGCTACCTGACGAGTCCTTTTTAGGACGAA  
+  
,FFFFFFFFFFFFFFFFFFFFFFFFFFFFF: ,FFFFFFFFFFFFFFFF:FFFFFFFFFFFFFF:FFFFFFFFFFFFFF  
FFFFFFFFFFFFFFFFFFFFFFFFFFFFFFFF:FFFFFFFFF:FFFFFFFFFFFFFFFFFFFFFFFFFFFFFFFFFFFFF

@A00155:342:HHGFNDSXY:1:1268:3260:21543 1:N:0:GAACCTAG+TCCGCATA  
 TTAAGGACTCTCCTCTGGCCTATGGTCATCTCAATGCCGAGAGGGATGTGGAGGGCGAGAGAGAGCGA  
 CTTCTCTCGGGCCCACAGCCTTACAGCTGTGGAGCACGGTATCCTCTGCCGAAACAGAGGTTGGACAA  
 +  
 FFFFFFFFFFFFFFFFFFFFFFFFFFFFFFFFFFFFFFFFFFFFFFFFFFFFFFFFFFFFFFFFFFFFFFFFFF:FFFFFFFF,FFFFFFFFFFFFFFFFFFFFFFFF  
 FFFFFFFFFFFFFFFFFFFFFFFFFFFFFFFFFFFFFFFFFFFFFFFFFFFFFFFFFFFFFFFFFFFFFFFFFF:FFFFFFFFFFFFFFFFFFFFFFFFFFFFFFFF, F  
 @A00155:342:HHGFNDSXY:1:1268:24813:22764 1:N:0:GAACCTAG+TCCGCATA  
 CTTACAGCTGTGGAGCACGGTATCCTCTGCCGAAACAGAGGTTGGACAAGACCGGAGGGGTCTCCCA  
 GTTCCAAAGGAGATGTACTCCGGGCTTGTTACGACCTACCGTGTAACTCGTAGTCTAGTAGGCTACC  
 +  
 FFFFFFFFFFFFFFFFFFFFFFFFFFFFFFFFFFFFFFFFFFFFFFFFFFFFFFFFFFFFFFFFFFFFFFFFFF:FFFFFFFFFFFFFFFFFFFFFFFF  
 FFFFF:FFFFFFFFFFFFFFFFFFFFFFFFFFFFFFFFFFFFFFFFFFFFFFFFFFFFFFFFFFFFFFFFFFFF  
 @A00155:342:HHGFNDSXY:1:1268:5846:25989 1:N:0:GAACCTAG+TCCGCATA  
 GGATGTGGAGGGCGAGAGAGAGCGACTTCTCTCGGGCCCACAGCCTTACAGCTGTGGAGCACGGTATC  
 CTCTGCCGAAACAGAGGTTGGACAAGACCGGAGGGGTCTCCTAGTTCCAAAGGAGATGTACTCC  
 +  
 FFFFFFFFFFFFFFFFFFFFFFFFFFFFFFFFFFFFFFFFFFFFFFFFFFFFFFFFFFFFFFFFFFFFFFFFFF:FFFFFFFFFFFFFFFFFFFFFFFF  
 FFFFFFFFFFFFFFFFFFFFFFFFFFFFFFFFFFFFFFFFFFFFFFFFFFFFFFFFFFFFFFFFFFFFFFFFFF:FFFFFFFFFFFFFFFFFFFFFFFF  
 @A00155:342:HHGFNDSXY:1:1269:8223:10629 1:N:0:GAACCTAG+TCCGCATA  
 TGCCGAGAGGGATGTAGAGGGCGAGAGAGAGCGACTTCTCTCGGGCCCACAGCCTTACAGCTGTGGAG  
 CACGGTATCCTCTGCCGAAACAGAGGTTGGACAAGACCGGAGGGGTCTCCTAGTTCCAAAGGAG  
 +  
 FFF:FFFFFFFFF,FFFFFFFFFFFFFFFFFFFFFFFFFFFFFFFFFFFFFFFFFFFFFFFFFFFFFFFFFFFF  
 FFFFFFFFFFFFFFFFFFFFFFFFFFFFFFFFFFFFFFFFFFFFFFFFFFFFFFFFFFFFFFFFFFFFFFFFFF  
 @A00155:342:HHGFNDSXY:1:1269:9607:19727 1:N:0:GAACCTAG+TCCGCATA  
 AGAGCGACTTCTCTCGGGCCCACAGCCTTACAGCTGTGGAGCACGGTATCCTCTGCCGAAACAGAGGT  
 TGGACAAGACCGGAGGGGTCTCCTAGTTCCAAAGGAGATGTACTCCGGGCTTGTTACGACCTACCGT  
 +  
 FFFFFFFFFFFFFFFFFFFFFFFFFFFFFFFFFFFFFFFFFFFFFFFFFFFFFFFFFFFFFFFFFFFFFFFFFF:FFFFFFFFFFFFFFFFFFFFFFFF  
 FFFFFFFFFFFFFFFFFFFFFFFFFFFFFFFFFFFFFFFFFFFFFFFFFFFFFFFFFFFFFFFFFFFFFFFFFF:FFFFFFFFFFFFFFFFFFFFFFFF  
 @A00155:342:HHGFNDSXY:1:1269:8594:22138 1:N:0:GAACCTAG+TCCGCATA  
 AGAGCGACTTCTCTCGGGCCCACAGCCTTACAGCTGTGGAGCACGGTATCCTCTGCCGAAACAGAGGT  
 TGGACAAGACCGGAGGGGTCTCCTAGTTCCAAAGGAGATGTACTCCGGGCTTGTTACGACCTACCGT  
 +  
 FFFFFFFFFFFFFFFFFFFFFFFFFFFFFFFFFFFFFFFFFFFFFFFFFFFFFFFFFFFFFFFFFFFFFFFFFF:FFFFFFFFFFFFFFFFFFFFFFFF  
 FFFFFFFFFFFFFFFFFFFFFFFFFFFFFFFFFFFFFFFFFFFFFFFFFFFFFFFFFFFFFFFFFFFFFFFFFF:FFFFFFFFFFFFFFFFFFFFFFFF  
 @A00155:342:HHGFNDSXY:1:1269:31123:25175 1:N:0:GAACCTAG+TCCGCATA  
 CGAGAGGGATGTGGAGGGCGAGAGAGAGCGACTTCTCTCGGGCCCACAGCCTTACAGCTGTGGAGCAC  
 GGTATCCTCTGCCGAAACAGAGGTTGGACAAGACCGGAGGGGTCTCCTAGTTCCAAAGGAGATGTACT  
 +  
 FFFFFFFFFFFFFFFFFFFFFFFFFFFFFFFFFFFFFFFFFFFFFFFFFFFFFFFFFFFFFFFFFFFFFFFFFF:FFFFFFFFFFFFFFFFFFFFFFFF  
 FFFFFFFFFFFFFFFFFFFFFFFFFFFFFFFFFFFFFFFFFFFFFFFFFFFFFFFFFFFFFFFFFFFFFFFFFF:FFFFFFFF  
 @A00155:342:HHGFNDSXY:1:1269:28004:32174 1:N:0:GAACCTAG+TCCGCATA  
 CTATGGTCATCTCAATGCCGAGAGGGATGTGGAGGGCGAGAGAGAGCGACTTCTCTCGGGCCCACAGC  
 CTTACAGCTGTGGAGCACGGTATCCTCTGCCGAAACAGAGGTTGGACAAGACCGGAGGGGTCTCCTGG  
 +  
 FFFFFFFFFFFFFFFFFFFFFFFFFFFFFFFFFFFFFFFFFFFFFFFFFFFFFFFFFFFFFFFFFFFFFFFFFF:FFFFFFFFFFFFFFFFFFFFFFFF  
 FFFFFFFFFFFFFFFFFFFFFFFFFFFFFFFFFFFFFFFFFFFFFFFFFFFFFFFFFFFFFFFFFFFFFFFFFF:FFFFFFFFFFFFFFFFFFFFFFFF  
 @A00155:342:HHGFNDSXY:1:1270:23167:1689 1:N:0:GAACCTAG+TCCGCATA  
 GAGGGCGAGAGAGAGCGACTTCTCTCGGGCCCACAGCCTTACAGCTGTGGAGCACGGTATCCTCTGCC  
 GAAACAGAGGTTGGACAAGACCGGAGGGGTCTCCTAGTTCCAAAGGAGATGTACTCCGGGCTTGTTCA  
 +  
 FFFFFFFFFFFFFFFFFFFFFFFFFFFFFFFFFFFFFFFFFFFFFFFFFFFFFFFFFFFFFFFFFFFFFFFFFF:FFFFFFFFFFFFFFFF  
 FFFFFFFFFF:FFFFFFFF:FFFFFFFFFFFFFFFFFFFFFFFFFFFFFFFFFFFFFFFFFFFFFFFFFFFF

@A00155:342:HHGFNDSXY:1:1270:20735:4742 1:N:0:GAACCTAG+TCCGCATA  
 ACTTCTCTCGGGCCACAGCCTTACAGCTGTGGAGCACGGTATCCTCTGCCGAAACAGAGGTTGGACA  
 AGACCGGAGGGGTCTCCTGGTTCCAAAGGAGATGTACTCCGGGCTTGTTACGACCTACCGTGTAAGT  
 +  
 FF:FFFFFFFFFFFFFFFFFFFFFFFF:FFFFFFFFFFFFFFFFFFFFFFFFFFFFFFFFFFFFFFFFFFFFF  
 F:FFFFFFFF:FFFFFFFFFFFFFFFFFFFFFFFFFFFFFFFFFFFFFFFFFFFFFFFFFFFFFFFFFFFFF  
 @A00155:342:HHGFNDSXY:1:1270:15555:10833 1:N:0:GAACCTAG+TCCGCATA  
 TCGGCAGAGGATACCGTGCTCCACAGCTGTAAGGCTGTGGGCCCAGAGAAAGTCGCTCTCTCGCCC  
 TCCACATCCCTCTCGGCATTGAGATGACCATAGGCCAGAGGTGAGTCCTTAAGTGGACACA  
 +  
 FFFFFFFFFFFFFFFFFFFFFFFFFFFFFFFFFFFFFFFFFFFFFFFFFFFFFFFFFFFFFFFFFFFFFFFFFF  
 FFFFFFFFFFFFFFFFFFFFFFFFFFFFFFFFFFFFFFFFFFFFFFFFFFFFFFFFFFFFFFFFFFFFFFFFFF:FFFFF:FFFFFFF  
 @A00155:342:HHGFNDSXY:1:1270:9625:26459 1:N:0:GAACCTAG+TCCGCATA  
 GGATGTGGAGGGCGAGAGAGAGCGACTTCTCTCGGGCCCACAGCCTTACAGCTGTGGAGCACGGTATC  
 CTCTGCCGAAACAGAGGTTGGACAAGACCGGAGGGGTCTCCTAGTTCCAAAGGAGATGTACTCC  
 +  
 FFFFFFFFFFFFFFFFFFFFFFFFFFFFFFFFFFFFFFFFFFFFFFFFFFFFFFFFFFFFFFFFFFFFFFFFFF  
 FFFFFFFFFFFFFFFFFFFFFFFFFFFFFFFFFFFFFFFFFFFFFFFFFFFFFFFFFFFFFFFFFFFFFFFFFF:FFFFFFF  
 @A00155:342:HHGFNDSXY:1:1271:18430:2284 1:N:0:GAACCTAG+TCCGCATA  
 TACGACTTACCGTAGGTCGTGAACAAGCCCGAGTACATCTCCTTTGGAAGTACAGAGACCCCTCCG  
 GTCTTGTTCAACCTCTGTTTCGGCAGAGGATACCGTGCTCCACAGCTGTAAGGCTG  
 +  
 FFFFFFFFFFFFFFFFFFFFFFFFFFFFFFFFFFFFFFFFFFFFFFFFFFFFFFFFFFFFFFFFFFFFFFFFFF  
 FFFFFFFFFFFFFFFFFFFFFFFFFFFFFFFFFFFFFFFFFFFFFFFFFFFFFFFFFFFFFFFFFFFFFFFFFF:FFFFFFF  
 @A00155:342:HHGFNDSXY:1:1271:20374:6339 1:N:0:GAACCTAG+TCCGCATA  
 CTTCTCTCGGGCCCACAGCCTTACAGCTGTGGAGCACGGTATCCTCTGCCGAAACAGAGGTTGGACAA  
 GACCGGAGGGGTCTCCTAGTTCCAAAGGAGATGTACTCCGGGCTTGTTACGACCTACCGTGTAAGTC  
 +  
 F:FFFFFFFFFFFFFFFFFFFFFFFFFFFFFFFFFFFFFFFFFFFFFFFFFFFFFFFFFFFFFFFFFFFFFFFFF  
 :FFFFFFFFFFFFFFFFFFFFFFFFFFFFFFFFFFFFFFFFFFFFFFFFFFFFFFFFFFFFFFFFFFFFFFFFF:FFF  
 @A00155:342:HHGFNDSXY:1:1271:5918:16783 1:N:0:GAACCTAG+TCCGCATA  
 TTCTCTCGGGCCCACAGCCTTACAGCTGTGGAGCACGGTATCCTCTGCCGAAACAGAGGTTGGACAAG  
 ACCGGAGGGGTCTCCTAGTTCCAAAGGAGATGTACTCCGGGCTTGTTACGACCTACCGTGTAAGTCG  
 +  
 FFFFFFFFFFFFFFFFFFFFFFFFFFFFFFFFFFFFFFFFFFFFFFFFFFFFFFFFFFFFFFFFFFFFFFFFFF  
 FFF:FFFFFFFFFFFFFFFFFFFFFFFFFFFFFFFFFFFFFFFFFFFFFFFFFFFFFFFFFFFFFFFFFFFFF  
 @A00155:342:HHGFNDSXY:1:1271:3830:18051 1:N:0:GAACCTAG+TCCGCATA  
 TGACGGTCGGAGTCTAGTAGGCTCCCTGATGAGTCCGTTCCAAGGACGAAACCGTCGTTACTCTTTGA  
 GTTGTGTAAGTTTCGTCTAAAGGACTCGTCAGGTAGCCTACTAGACTACGACTTACACGGTAGGT  
 +  
 FFFFFFFFFFFFFFFFFFFFFFFFFFFFFFFFFFFFFFFFFFFFFFFFFFFFFFFFFFFFFFFFFFFFFFFFFF  
 FFFFFFFFFFFFFFFFFFFFFFFFFFFFFFFFFFFFFFFFFFFFFFFFFFFFFFFFFFFFFFFFFFFFFFFFFF:FFF:FFFFFFF,FFF  
 FFFFFFFFFFFFFFFFFFFFFFFFFFFFFFFFFFFFFFFFFFFFFFFFFFFFFFFFFFFFFFFFFFFFFFFFFF:F:FFFFFFFFF,FFFFFFFFFFFFFFFFFFFFFFFF:FFF:FF:  
 @A00155:342:HHGFNDSXY:1:1271:25889:28040 1:N:0:GAACCTAG+TCCGCATA  
 CGACTTCTCTCGGGCCCACAGCCTTACAGCTGTGGAGCACGGTATCCTCTGCCGAAACAGAGGTTGGA  
 CAAGACCGGAGGGGTCTCCTAGTTCCAAAGGAGATGTACTCCGGGCTTGTTACGACCTACCGTGTAAGT  
 +  
 FFFF:FFFFFFFFFFFFFFFFFFFFFFFFFFFFFFFFFFFFFFFFFFFFFFFFFFFFFFFFFFFFFFFFFFFFF  
 FFFFFFFFFFFFFFFFFFFFFFFFFFFFFFFFFFFFFFFFFFFFFFFFFFFFFFFFFFFFFFFFFFFFFFFFFF  
 @A00155:342:HHGFNDSXY:1:1271:21052:30499 1:N:0:GAACCTAG+TCCGCATA  
 ACCTCTGTTTCGGCAGAGGATACCGTGCTCCACAGCTGTAAGGCTGTGGGCCCAGAGAAAGTCGCTCT  
 CTCTCGCCCTTACATCCCTCTCGGCATTGAGATGACCATAGGCCAGAGGTGAGTCCTTAAGTGGACA  
 +  
 FFFFFFFFFFFFFFFFFFFFFFFFFFFFFFFFFFFFFFFFFFFFFFFFFFFFFFFFFFFFFFFFFFFFFFFFFF  
 FFFFFFFFFFFFFFFFFFFFFFFFFFFFFFFFFFFFFFFFFFFFFFFFFFFFFFFFFFFFFFFFFFFFFFFFFF:FFFFFFFFFFFFFFFFFFFFFFFFFFFFFFFFFFFFFFFFFFFFF

```
@A00155:342:HHGFNDSXY:1:1272:8974:2440 1:N:0:GAACCTAG+TCCGCATA
TTCTCTCGGGCCCCACAGCCTTACAGCTGTGGAGCACGGTATCCTCTGCCGAAACAGAGGTTGGACAAG
ACCGGAGGGGTCTCCTAGTTCCAAAGGAGATGTACTCCGGGCTTGTTACGACCTACCGTGTAAGTCG
+
FFF:FFFF:FFFF:FF:FFFFFFFF:FFF:FFFFFFFFFFFFFFF:FFFFFFFFF:FFFFFFFFFFFFF:
FFFFFFFFFFFFFFFFFFFFFFFFFFFFFFFFFFFFFFFFFFFFFFFFFFFFFFFFFFFFFFFFFFFFFFFFFFFF
@A00155:342:HHGFNDSXY:1:1272:8305:11397 1:N:0:GAACCTAG+TCCGCATA
GAGCGACTTCTCTCGGGCCCCACAGCCTTACAGCTGTGGAGCACGGTATCCTCTGCCGAAACAGAGGTT
GGACAAGACCGGAGGGGTCTCCTAGTTCCAAAGGAGATGTACTCCGGGCTTGTTACGACCTACCGTG
+
FFFFFFFFFFFFFFFFFFFFFFFFFFFFFFFFFFFFFFFFFFFFFFFFFFFFFFFFFFFFFFFFFFFFFFFFFFFF
FFFFFFFFFFFFFFFFFFFFFFFFFFFFFFFFFFFFFFFFFFFFFFFFFFFFFFFFFFFFFFFFFFFFFFFFFFFF
@A00155:342:HHGFNDSXY:1:1272:20690:11553 1:N:0:GAACCTAG+TCCGCATA
GGATGTGGAGGGCGAGAGAGAGCGACTTCTCTCGGGCCCCACAGCCTTACAGCTGTGGAGCACGGTATC
CTCTGCCGAAACAGAGGTTGGACAAGACCGGAGGGGTCTCCTAGTTCCAAAGGAGATGTACTCC
+
FFF,FFFFFFFFFFFFFFFFFFFFFFFFFFFFFFFFFFFFFFFFFFFFFFFFFFFFFFFFFFFFFFFFFFFFFFFF
FFFFFFFFFFFFFFFFFFFFFFFFFFFFFFFFFFFFFFFFFFFFFFFFFFFFFFFFFFFFFFFFFFFFFFFFFFFF
,F:FFFFFFFFFFFFFFFFFFFFFFFF
@A00155:342:HHGFNDSXY:1:1272:17381:18161 1:N:0:GAACCTAG+TCCGCATA
TGGTCATCTCAATGCCGAGAGGGATGTGGAGGGCGAGATAGAGCGACTTCTCTCGGGCCCCACAGCCTT
ACAGCTGTGGAGCACGGTATCCTCTGCCGAAACAGAGGTTGGACAAGACCGGAGGGGTCTCCTAGTTC
+
FFFFFFFFFFFFFFFFFFFFFFFFFFFFFFFFFFFFFFFFFFFFFFFFFFFFFFFFFFFFFFFFFFFFFFFFFFFF
FFFFFFFFFFFFFFFFFFFFFFFFFFFFFFFFFFFFFFFFFFFFFFFFFFFFFFFFFFFFFFFFFFFFFFFFFFFF
@A00155:342:HHGFNDSXY:1:1272:16441:20729 1:N:0:GAACCTAG+TCCGCATA
CTGTGTCCAATTAAGGACTCACCTCTGGCCTATGGTCATCTCAATGCCGAGAGGGATGTGGAGGGCGA
GAGAGAGCGACTTCTCTCGGGCCCCACAGCCTTACAGCTGTGGAGCACGGTATCCTCTGCCGAAACAGA
+
FFFF:FFFFFFFFFFFFFFFFFFFFFFFFFFFFFFFFFFFFFFFFFFFFFFFFFFFFFFFFFFFFFFFFFFFFF:
FFFFFFFFFFFFFFFFFFFFFFFFFFFFFFFFFFFFFFFFFFFFFFFFFFFFFFFFFFFFFFFFFFFFFFFFFFFF
,F:FFFFFFFFFFFFFFFFFFFFFFFFFFFFFFFFFFFFFFFFFFFFFFFFFFFFFFFFFFFFFFFFFFFFFFFFFFFF
@A00155:342:HHGFNDSXY:1:1272:12138:30405 1:N:0:GAACCTAG+TCCGCATA
AGGGATGTAGAGGGCGAGAGAGAGCGACTTCTCTCGGGCCCCACAGCCTTACAGCTGTGGAGCACGGTA
TCCTCTGCCGAAACAGAGGTTGGACAAGACCGGAGGGGTCTCCTAGTTCCAAAGGAGATGTACTCCGG
+
FFFFFFFFFFFFFFFFFFFFFFFFFFFFFFFFFFFFFFFFFFFFFFFFFFFFFFFFFFFFFFFFFFFFFFFFFFFF
FFFFFFFFFFFFFFFFFFFFFFFFFFFFFFFFFFFFFFFFFFFFFFFFFFFFFFFFFFFFFFFFFFFFFFFFFFFF
@A00155:342:HHGFNDSXY:1:1272:10095:34820 1:N:0:GAACCTAG+TCCGCATA
GACTTCTCTCGGGCCCCACAGCCTTACAGCTGTGGAGCACGGTATCCTCTGCCGAAACAGAGGTTGGAC
AAGACCGGAGGGGTCTCCTGGTTCCAAAGGAGATGTACTCCGGGCTTGTTACGACCTACCGTGTAAG
+
FFF:FFFFFFFFFFFFFFFFFFFFFFFFFFFFFFFFFFFFFFFFFFFFFFFFFFFFFFFFFFFFFFFFFFFFF:
FFFF
FF,FFFFFFFFFFFFFFFFFFFFFFFFFFFFFFFFFFFFFFFFFFFFFFFFFFFFFFFFFFFFFFFFFFFFFFFF
,FF:FFFFFFFFFFFFFFFFFFFFFFFF,FF:FFFFFFFFFFFFFFFFFFFFFFFF,FF,FFFFFFFFFFFFF
@A00155:342:HHGFNDSXY:1:1272:3369:34851 1:N:0:GAACCTAG+TCCGCATA
GAGAGGGATGTGGAGGGCGAGAGAGAGCGACTTCTCTCGGGCCCCACAGCCTTACAGCTGTGGAGCACG
GTATCCTCTGCCGAAACAGAGGTTGGACAAGACCGGAGGGGTCTCCTAGTTCCAAAGGAGATGTACTC
+
F:FFFFFFFFFFFFF:FFFFFFFFF:FFFFFFFFFFFFFFFFFFFFFFFFFFFFFFFFFFFFFFFFFFFFFFFF
:FFFFFFFFFFFF,FFFFFFFFFFFFFFFFFFFFFFFFFFFFFFFFFFFFFFFFFFFFFFFFFFFFFFFFFFFF
,:FFFF:FFFF:FF,FF,FFFFFFFFFFFFFFFFFFFF
@A00155:342:HHGFNDSXY:1:1272:29604:35164 1:N:0:GAACCTAG+TCCGCATA
AGGGCGAGAGAGAGCGACTTCTCTCGGGCCCCACAGCCTTACAGCTGTGGAGCACGGTATCCTCTGCCG
AAACAGAGGTTGGACAAGACCGGAGGGGTCTCCTAGTTCCAAAGGAGATGTACTCCGGGCTTGTTAC
```

@A00155:342:HHGFNDSXY:1:1273:20329:2065 1:N:0:GAACCTAG+TCCGCATA  
CAGCCTTACAGCTGTGGAGCACGGTATCCTCTGCCGAAACAGAGGTTGGACAAGACCGGAGGGGTCTC  
CTAGTTCCAAAGGAGATGTACTCCGGGCTTGTTACGACCTACCGTGTAAGTCGTAGTCTAGTAGGCT  
+  
FFFFFFFFFFFFFFFFFFFFFFFFFFFFFFFFFFFFFFFFFFFFFFFFFFFFF:FFFFFFFFFFF:FFFFFFFFFFFFFFF  
FFFFFFFFFFFFFFFFFFFFFFFFFFFFFFFFFFFFFFFFFFFFFFFFFFFFFFFFFFFFFFFFFFFFFFFFFFFFFFFF  
@A00155:342:HHGFNDSXY:1:1273:18620:2832 1:N:0:GAACCTAG+TCCGCATA  
CAGCCTTACAGCTGTGGAGCACGGTATCCTCTGCCGAAACAGAGGTTGGACAAGACCGGAGGGGTCTC  
CTAGTTCCAAAGGAGATGTACTCCGGGCTTGTTACGACCTACCGTGTAAGTCGTAGTCTAGTAGGCT  
+  
FFFFFFFFFFFFFFFFFFFFFFFFFFFFFFFFFFFFFFFFFFFFFFFFFFFFF:FFFFFFFFFFFFFFFFFFFFFFF  
FFFFFFFFFFF:FFFFFFFFFFFFFFFFFFFFFFFFFFFFFFFFFFFFFFFFFFFFF::FFFFFFFFFFF:FFFFFFF  
@A00155:342:HHGFNDSXY:1:1273:10276:8547 1:N:0:GAACCTAG+TCCGCATA  
ACTTCTCTCGGGCCCACAGCCTTACAGCTGTGGAGCACGGTATCCTCTGCCGAAACAGAGGTTGGACA  
AGACCGGAGGGGTCTCCTAGTTCCAAAGGAGATGTACTCCGGGCTTGTTACGACCTACCGTGTAAGT  
+  
:FFFFFFFFFFFFFFFFFFFFFFFFFFFFF:FFFFFFFFFFFFFFFFFFFFFFFFFFFFFFFFFFFFFFFFFFFFFFF  
FFFFFFFFFFFFFFFFFFFFFFFFFFFFFFFFFFFFFFFFFFFFFFFFFFFFF:FFFFFFFFFFFFFFFFFF:FF  
@A00155:342:HHGFNDSXY:1:1273:10438:11804 1:N:0:GAACCTAG+TCCGCATA  
CTTCTCTCGGGCCCACAGCCTTACAGCTGTGGAGCACGGTATCCTCTGCCGAAACAGAGGTTGGACAA  
GACCGGAGGGGTCTCCTAGTTCCAAAGGAGATGTACTCCGGGCTTGTTACGACCTACCGTGTAAGTC  
+  
FFFFFFFFFFFFFFFFFFFFFFFFFFFFFFFFFFFFFFFFFFFFFFFFFFFFF:FFFFFFFFFFFFFFFFFFFFFFF  
FFFFFFFFFFFFFFFFFFFFFFFFFFFFFFFFFFFFFFFFFFFFFFFFFFFFF:FFFFFFFFFFFFFFFFFF:FF  
@A00155:342:HHGFNDSXY:1:1273:31349:16579 1:N:0:GAACCTAG+TCCGCATA  
CTTCTCTCGGGCCCACAGCCTTACAGCTGTGGAGCACGGTATCCTCTGCCGAAACAGAGGTTGGACAA  
GACCGGAGGGGTCTCCTAGTTCCAAAGGAGATGTACTCCGGGCTTGTTACGACCTACCGTGTAAGTC  
+  
FFFFFFFFFFFFFFFFFFFFFFFFFFFFFFFFFFFFFFFFFFFFFFFFFFFFF:FFFFFFFFFFFFFFFFFFFFFFF  
FFFFFFFFFFFFFFFFFFFFFFFFFFFFFFFFFFFFFFFFFFFFFFFFFFFFF:FFFFFFFFFFFFFFFFFF:FF  
@A00155:342:HHGFNDSXY:1:1273:18548:23688 1:N:0:GAACCTAG+TCCGCATA  
CTCAATGCCGAGAGGGATGTGGAGGGCGAGAGAGAGCGACTTCTCTCGGGCCCACAGCCTTACAGCTG  
TGGAGCACGGTATCCTCTGCCGAAACAGAGGTTGGACAAGACCGGAGGGGTCTCCTAGTTCCAAAGGA  
+  
FFFFFFFFFFFFFFFFFFFFFFFFFFFFFFFFFFFFFFFFFFFFFFFFFFFFF:FFFFFFFFFFFFFFFFFFFFFFF  
FFFFFFFFFFFFFFFFFFFFFFFFFFFFFFFFFFFFFFFFFFFFFFFFFFFFF:FFFFFFFFFFFFFFFFFF:FF  
@A00155:342:HHGFNDSXY:1:1273:19407:25394 1:N:0:GAACCTAG+TCCGCATA  
CTTCTCTCGGGCCCACAGCCTTACAGCTGTGGAGCACGGTATCCTCTGCCGAAACAGAGGTTGGACAA  
GACCGGAGGGGTCTCCTGGTTCCAAAGGAGATGTACTCCGGGCTTGTTACGACCTACCGTGTAAGTC  
+  
FFFFFFFFFFFFFFFFFFFFFFFFFFFFFFFFFFFFFFFFFFFFFFFFFFFFF:FFFFFFFFFFFFFFFFFFFFFFF  
FFFFFFFFFFFFFFFFFFFFFFFFFFFFFFFFFFFFFFFFFFFFFFFFFFFFF:FFFFFFFFFFFFFFFFFF:FF  
@A00155:342:HHGFNDSXY:1:1273:9182:26349 1:N:0:GAACCTAG+TCCGCATA  
GTCATCTCAATGCCGAGAGGGATGTGGAGGGCGAGAGAGAGCGACTTCTCTCGGGCCCACAGCCTTAC  
AGCTGTGGAGCACGGTATCCTCTGCCGAAACAGAGGTTGGACAAGACCGGAGGGGTCTCCTAGTTCCA  
+  
FFFFFFFFFFFFFFFFFFFFFFFFFFFFFFFFFFFFFFFFFFFFFFFFFFFFF:F:FF::FFFF:FFFFFFFF:FFFFF,FFFFFFFFFFFFFFFFFFFFFFFF  
FFFFFFFFFFFFFFFFFFFFFFFFFFFFFFFFFFFFFFFFFFFFFFFFFFFFF:F:FFFFFFFFFFF::F:FFFFFFFFFFFFFFFFFFFFFFFFFFFFF,FFFFFFF  
@A00155:342:HHGFNDSXY:1:1274:6008:23672 1:N:0:GAACCTAG+TCCGCATA  
GCGACTTCTCTCGGGCCCACAGCCTTACAGCTGTGGAGCACGGTATCCTCTGCCGAAACAGAGGTTGG  
ACAAGACCGGAGGGGTCTCCTAGTTCCAAAGGAGATGTACTCCGGGCTTGTTACGACCTACCGTGTA  
+  
FFFFFFFFFFFFFFFFFFFFFFFFFFFFFFFFFFFFFFFFFFFFFFFFFFFFF:F:FFFFFFFFFFFFFFFFFF:FF:FFFFFFFFFFFFFFFFFFFFFFFF  
FFFFFFFFFFFFFFFFFFFFFFFFFFFFFFFFFFFFFFFFFFFFFFFFFFFFF:FFFFFFFFFFFFFFFFFF:FF:FFFFFFFFFFFFFFFFFFFFFFFFFFFFF

[illegible]



[illegible]

@A00155:342:HHGFNDSXY:1:1278:16579 1:N:0:GAACCTAG+TCCGCATA  
CCGAGAGGGATGTGGAGGGCGAGAGAGAGCGACTTCTCTCGGGCCACAGCCTTACAGCTGTGGAGCA  
CGGTATCCTCTGCCGAAACAGAGGTTGGACAAGACCGGAGGGGTCTCCTAGTTCCAAAGGAGATGTAC  
+  
F,,FF:,FFFFFF:FFFFFFFFFFFF:FFFF:FFFF,,FFFFFF:,F,FFFF,FFFFFF:F:FFF,:F,FF  
F::FFFFFFFFFFFF:FFF:F,F,FFFF,FFF::FFF,FFF:FFFFFFFF,F:F,F:FFFF,F:FF:FFF  
@A00155:342:HHGFNDSXY:1:1278:9182:16799 1:N:0:GAACCTAG+TCCGCATA  
TGCCGAGAGGGATGTGGAGGGCGAGAGAGAGCGACTTCTCTCGGGCCACAGCCTTACAGCTGTGGAG  
CACGGTATCCTCTGCCGAAACAGAGGTTGGACAAGACCGGAGGGGTCTCCCAGTTCCAAAGGAGATGT  
+  
FFFFFFFFFFFFFFFFFFFFFFFFFFFFFFFFFFFFFFFFFFFFFFFFFFFFFFFFFFFFFFFFFFFFFFFFFFFF  
FFFFFFFFFFFFFFFFFFFFFFFFFFFFFFFFFFFFFFFFFFFFFFFFFFFFFFFFFFFFFFFFFFFFFFFFFFFF  
@A00155:342:HHGFNDSXY:1:1278:19397:36526 1:N:0:GAACCTAG+TCCGCATA  
CTTCTCTCGGGCCACAGCCTAACAGCTGTGGAGCACGGTATCCTCTGCCGAAACAGAGGTTGGACAA  
GACCGGAGGGGTCTCCTAGTTCCAAAGGAGATGTACTCCGGGCTTGTTACGACCTACCGTGTAAGTC  
+  
FFFFFFFFFFFFFFFFFFFFFFFFFFFFFFFFFFFFFFFFFFFFFFFFFFFFFFFFFFFFFFFFFFFFFFFFFFFF  
:FFFFFFFFFFFFFFFFFFFFFFFFFFFFFFFFFFFFFFFFFFFFFFFFFFFFFFFFFFFFFFFFFFFFFFFFFFFF  
@A00155:342:HHGFNDSXY:1:1301:13973:1078 1:N:0:GAACCTAG+TCCGCATA  
GTCATCTCAATGCCGAGAGGAATGTGGAGGGCGAGAGAGAGCGACTTCTCTCGGGCCACAGCCTTAC  
AGCTGTGGAGCACGGTATCCTCTGCCGAAACAGAGGTTGGACAAGACCGGAGGGGTCTCCTAGTTCCA  
+  
FFFFFFFFFFFFFFFFFFFFFFFFFFFF,FFFFFFFFFFFFFFFFFFFFFFFFFFFFFFFFFFFFFFFFFFFFF  
FFFFFFFFFFFFFFFFFFFFFFFFFFFFFFFFFFFFFFFFFFFFFFFFFFFFFFFFFFFFFFFFFFFFFFFFFFFF  
@A00155:342:HHGFNDSXY:1:1301:5330:12038 1:N:0:GAACCTAG+TCCGCATA  
GGACAAGACCGGAGGGGTCTCCTAGTTCCAAAGGAGATGTACTCCGGGCTTGTTACGACCTACCGTG  
TAAGTCGTAGTCTAGTAGGCTACCTGACGAGTCCTTTTAGGACGAACTTACACAACCTCAAAG  
+  
FFFFFFF:FFFFFFFFFFFFFFFFFFFFFFFFFFFFFFFFFFFF,FFFFFFFFF,,FFFFFFFFFFFFFFFFFFFF  
FFFFFF:FFF:FF:FFFFFFFFFFFFFFFFFFFF:FFFFF:FFFFFFFFFFFFFFFFFFFFFFFFFFFFF  
@A00155:342:HHGFNDSXY:1:1301:11758:25300 1:N:0:GAACCTAG+TCCGCATA  
TCAATGCCGAGAGGGATGTGGAGGGCGAGAGAGAGCGACTTCTCTCGGGCCACAGCCTTACAGCTGT  
GGAGCACGGTATCCTCTGCCGAAACAGAGGTTGGACAAGACCGGAGGGGTCTCCTAGTTCCAAAGGAG  
+  
FFFFFFFFFFFFFFFFFFFF,FFFFFFFFFFFFFFFFFFFF,FFFFFFFFFFFFFFFFFFFFFFFFFFFFFFFFFFFF  
FF:FFFFFFFFFFFFFFFFFFFFFFFFFFFFFFFFFFFF:FFF,FF:FFFFFFFFFFFFF,FFFFFFFFF  
@A00155:342:HHGFNDSXY:1:1301:11632:25676 1:N:0:GAACCTAG+TCCGCATA  
TCAATGCCGAGAGGGATGTGGAGGGCGAGAGAGAGCGACTTCTCTCGGGCCACAGCCTTACAGCTGT  
GGAGCACGGTATCCTCTGCCGAAACAGAGGTTGGACAAGACCGGAGGGGTCTCCTAGTTCCAAAGGAG  
+  
FFFFFFFFFFFFFFFFFFFF:FFFFFFFFFFFFFFFFFFFFFFFFFFFFFFFFFFFFFFFFFFFFFFFFFFFFF  
FFFFFFFFFFFF:FF:FFFFFFFFFFFFFFFFFFFFFFFFFFFFFFFFFFFFFFFFFFFFFFFFFFFFF  
@A00155:342:HHGFNDSXY:1:1301:25572:26835 1:N:0:GAACCTAG+TCCGCATA  
GATGTGGAGGGCGAGAGAGAGCGACTTCTCTCGGGCCACAGCCTTACAGCTGTGGAGCACGGTATCC  
TCTGCCGAAACAGAGGTTGGACAAGACCGGAGGGGTCTCCTAGTTCCAAAGGAGATGTACTCCGGGCT  
+  
FFFFFFFFFFFFFFFFFFFFFFFFFFFFFFFFFFFFFFFFFFFF:FFFF:FFFFFFFFFFFFFFFFFFFFF  
FFFFFFFFFFFFFFFFFFFFFFFFFFFFFFFFFFFFFFFFFFFFFFFFFFFFFFFFFFFFFFFFFFFFF  
@A00155:342:HHGFNDSXY:1:1301:14181:35321 1:N:0:GAACCTAG+TCCGCATA  
GGGGCCACAGCCTTACAGCTGTGGAGCACGGTATCCTCTGCCGAAACAGAGGTTGGACAAGACCGGAG  
GGGTCTCCTAGTTCCAAAGGAGATGTACTCCGGGCTTGTTACGACCTACCGTGTAAGTCG  
+  
FFFFFFFFFFFFF:FFFFFFFFFFFFFFFFFFFFFFFFFFFFFFFFFFFFFFFFFFFFFFFFFFFFF  
FFFFFFFFFFFFFFFFFFFFFFFFFFFFFFFFFFFFFFFFFFFFFFFFFFFFFFFFFFFFFFFFFFFFF  
@A00155:342:HHGFNDSXY:1:1301:14181:35321 1:N:0:GAACCTAG+TCCGCATA  
GGGGCCACAGCCTTACAGCTGTGGAGCACGGTATCCTCTGCCGAAACAGAGGTTGGACAAGACCGGAG  
GGGTCTCCTAGTTCCAAAGGAGATGTACTCCGGGCTTGTTACGACCTACCGTGTAAGTCG

@A00155:342:HHGFNDSXY:1:1303:8585:8437 1:N:0:GAACCTAG+TCCGCATA  
GGCGAGAGAGAGCGACTTCTCTCGGGCCCACAGCCTTACAGCTGTGGAGCACGGTATCCTCTGCCGAA  
ACAGAGGTTGGACAAGACCGGAGGGGTCTCCTAGTTCCAAAGGAGATGTACTCCGGGCTTGTTACACGA  
+  
FFFFFFFFFFFFFFFFFFFFFFFF:FFFFF:FFFFFFFFFFFF:FFFFFFFFFF:FFFFFFFFFFFFFFFF  
FFFFFFFFFFFFFFFFFFFFFFFF:FFFFFFFFFFFFFFFFFFFFFFFFFFFFFFFFFFFFFFFFFFFFFFFF  
@A00155:342:HHGFNDSXY:1:1303:3341:9752 1:N:0:GAACCTAG+TCCGCATA  
CAATGCCGAGAGGGATGTAGAGGGCGAGAGAGCGACTTCTCTCGGGCCCACAGCCTTACAGCTGTG  
GAGCACGGTATCCTCTGCCGAAACAGAGGTTGGACAAGACCGGAGGGGTCTCCTAGTTCCAAAGGAGA  
+  
FFFFFFFFFFFFFFFFFFFFFFFFFFFFFFFF:FFFFF:,FFFFFFFFFFFF,FFFFF:F:FFFFFFFFFFFF  
FFFFFFFFFFFFFFFFFFFFFFFFFFFFFFFF,FFFFFFFF,FFFFFFFFFFFFFFFF:FF:FFFFF,FFFFF  
@A00155:342:HHGFNDSXY:1:1303:20012:18364 1:N:0:GAACCTAG+TCCGCATA  
AGAGAGAGCGACTTCTCTCGGGCCCACAGCCTTACAGCTGTGGAGCACGGTATCCTCTGCCGAAACAG  
AGGTTGGACAAGACCGGAGGGGTCTACTAGTTCCAAAGGAGATGTACTCCGGGCTTGTTACACGACCTA  
+  
FFFFFFFFFFFFFFFFFFFFFFFFFFFFFFFF:FFFFFFFFFFFFFFFFFFFFFFFFFFFFFFFFFFFFFFFF  
FFFFFFFFFFFFFFFFFFFFFFFFFFFFFFFF:FFFFFFFFFFFFFFFFFFFFFFFFFFFFFFFFFFFFFFFF  
@A00155:342:HHGFNDSXY:1:1304:12554:2033 1:N:0:GAACCTAG+TCCGCATA  
ACCTCTGTTTCGGCAGAGGATACCGTGCTCCACAGCTGTAAGGCTGTGGGCCCAGAGAAGTCGCTCT  
CTCTCGCCCTTACATCCCTCTCGGCATTGAGATGACCATAGGCCAGAGGTGAGTCCTTAAGTGGACA  
+  
FFFFF:FFFFFFFFFFFFFFFFFFFFFFFFFFFFFFFFFFFFFFFFFFFFFFFFFFFFFFFFFFFFFFFF  
FFFFFFFFFFFFFFFFFFFFFFFFFFFFFFFFFFFFFFFFFFFFFFFFFFFFFFFFFFFFFFFFFFFFFFFF  
@A00155:342:HHGFNDSXY:1:1304:18973:27430 1:N:0:GAACCTAG+TCCGCATA  
CACCTCTGGCCTATGGTCATCTCAATGCCGAGAGGGATGTGGAGGGCGAGAGAGCGACTTCTCTCG  
GGCCCACAGCCTTACAGCTGTGGAGCACGGTATCCTCTGCCGAAACAGAGGTTGGACAAGACCGGAGG  
+  
FFFFFFFFFFFFFFFFFFFFFFFFFFFFFFFFFFFFFFFFFFFFFFFFFFFFFFFFFFFFFFFFFFFFFFFF  
FFFFFFFFFFFFFFFFFFFFFFFFFFFFFFFF:FFFFFFFFFFFFFFFFFFFFFFFFFFFFFFFFFFFFFFFF  
@A00155:342:HHGFNDSXY:1:1304:19452:36464 1:N:0:GAACCTAG+TCCGCATA  
CACCTCTGGCCTATGGTCATCTCAATGCCGAGAGGGATGTGAAGGGCGAGAGAGAGCGACTTCTCTCG  
GGCCCACAGCCTTACAGCTGTGGAGCACGGTATCCTCTGCCGAAACAGAGGTTGGACAAGACCGGAG  
+  
FFFFFFFFFFFFFFFFFFFFFFFFFFFF:FFFFFFFFF:FFFFFFFFFFFFFFFFFFFFFFFF:FFFFFFFFFFFF  
FFFFFFFFFFFF:FFFFFFFFFFFF:FFFFFFFFFFFFFFFFFFFFFFFFFFFFFFFFFFFFFFFFFFFF  
@A00155:342:HHGFNDSXY:1:1305:8793:15342 1:N:0:GAACCTAG+TCCGCATA  
AGAGAGAGCGACTTCTCTCGGGCCCACAGCCTTACAGCTGTGGAGCACGGTATCCTCTGCCGAAACAG  
AGGTTGGACAAGACCGGAGGGGTCTCCTAGTTCCAAAGGAGATGTACTCCGGGCTTGTTACACGACCTA  
+  
FFFFF,FFFFFFFFFFFFFFFFFFFFFFFF:FFFFFFFFF:,F,FFFFFFFFFFFFFFFFFFFFFFFF  
FFFFFFFFFFFF,FFFFFFFFFFFFFFFFFFFFFFFF,FFFFFFFFF:FFFFFFFFFFFFFFFFFFFFFFFF  
@A00155:342:HHGFNDSXY:1:1305:16893:16783 1:N:0:GAACCTAG+TCCGCATA  
CTTCTCTCGGGCCCACAGCCTTACAGCTGTGGAGCACGGTATCCTCTGCCGAAACAGAGGTTGGACAA  
GACCGGAGGGGTCTCCTAGTTCCAAAGGAGATGTACTCCGGGCTTGTTACACGACCTACCGTGTAAGTC  
+  
FFFFFFFFFFFFFFFFFFFFFFFFFFFFFFFF:FFFFFFFFFFFFFFFFFFFFFFFFFFFFFFFFFFFFFFFF  
F,FFFFFFFFFFFFFFFFFFFFFFFFFFFFFFFFFFFFFFFFFFFFFFFFFFFFFFFFFFFFFFFFFFFF  
@A00155:342:HHGFNDSXY:1:1306:11379:4131 1:N:0:GAACCTAG+TCCGCATA  
ATGCCGAGAGGGATGTGGAGGGCGAGAGAGAGCGACTTCTCTCGGGCCCACAGCCTTACAGCTGTGGA  
GCACGGTATCCTCTGCCGAAACAGAGGTTGGACAAGACCGGAGGGGTCTCCTGGTTCCAAAGGAGATG  
+  
F:FF:FFFFFFFF,FFFFFFFFFFFFFFFFFFFF,,FFF::FFFF:FFFFFFFFFFFF,FFFFFFFFFFFF,F  
FFFF:FFFFFFFFFFFF:FFFFFFFFFFFFFFFFFFFF:FF:F:FFFFFFFFFFFFFFFFFFFFFFFFFFFF

[illegible]

[illegible]

[illegible]

```
@A00155:342:HHGFNDSXY:1:1311:22959:31579 1:N:0:GAACCTAG+TCCGCATA
ACTTCTCTCGGGCCCACAGCCTTACAGCTGTGGAGCACGGTATCCTCTGCCGAAACAGAGGTTGGACA
AGACCGGAGGGGTCTCCTGGTTCCAAAGGAGATGTACTCCGGGCTTGTTACGACCTACCGTGTAAGT
+
FFFFFFFFFFFFFFFFFFFFFFFFFFFFFFFFFFFFFFFFFFFFFFFFFFFFFFFFFFFFFFFFFFFFFFFFF
FFFFFFFFFFFFFFFFFFFFFFFFFFFFFFFFFFFFFFFFFFFFFFFFFFFFFFFFFFFFFFFFFFFFFFFFF:
@A00155:342:HHGFNDSXY:1:1311:9570:32064 1:N:0:GAACCTAG+TCCGCATA
TTCTCTCGGGCCCACAGCCTTACAGCTGTGGAGCACGGTATCCTCTGCCGAAACAGAGGTTGGACAAG
ACCGGAGGGGTCTCCTAGTTCCAAAGGAGATGTACTCCGGGCTTGTTACGACCTACCGTGTAAGTCG
+
FFFFFFFFFFFFFFFFFFFFFFFFFFFFFFFFFFFFFFFFFFFFFFFFFFFFFFFFFFFFFFFFFFFFFFFFF
FFFFFFFFFFFFFFFFFFFFFFFFFFFFFFFFFFFFFFFFFFFFFFFFFFFFFFFFFFFFFFFFFFFFFFFFF:
@A00155:342:HHGFNDSXY:1:1311:25418:36182 1:N:0:GAACCTAG+TCCGCATA
CTATGCCGAGAGGGATGTGGAGGGCGAGAGAGAGCGACTTCTCTCGGGCCCACAGCCTTACAGCTGTG
GAGCACGGTATCCTCTGCCGAAACAGAGGTTGGACAAGACCGGAGGGGTCTCCTAGTTCCAAAGGAGA
+
FFFFFFFFFFFFFFFFFFFFFFFFFFFFFFFFFFFFFFFFFFFFFFFFFFFFFFFFFFFFFFFFFFFFFFFFF
FFFFFFFFFFFFFFFFFFFFFFFFFFFFFFFFFFFFFFFFFFFFFFFFFFFFFFFFFFFFFFFFFFFFFFFFF:
@A00155:342:HHGFNDSXY:1:1312:14705:1720 1:N:0:GAACCTAG+TCCGCATA
AGGGATGTGGAGGGCGAGAGAGAGCGACTTCTCTCGGGCCCACAGCCTTACAGCTGTGGAGCACGGTA
TCCTCTGCCGAAACAGAGGTTGGACAAGACCGGAGGGGTCTCCTAGTTCCAAAGGAGATGTACTCCGG
+
FFFFFFFFFFFFFFFFFFFFFFFFFFFFFFFFFFFFFFFFFFFFFFFFFFFFFFFFFFFFFFFFFFFFFFFFF
FFFFFFFFFFFFFFFFFFFFFFFFFFFFFFFFFFFFFFFFFFFFFFFFFFFFFFFFFFFFFFFFFFFFFFFFF
@A00155:342:HHGFNDSXY:1:1312:23755:4053 1:N:0:GAACCTAG+TCCGCATA
ATCTCAATGCCGAGAGGGATGTGGAGGGCGAGAGAGAGCGACTTCTCTCGGGCCCACAGCCTTACAGC
TGTGGAGCACGGTATCCTCTGCCGAAACAGAGGTTGGACAAGACCGGAGGGGTCTCCTAGTTCCAAAG
+
FFFFFFFFFFFF,FFFFFFFFFFF:FFFF:FFFFFFFFFFFF:FFFFFFFFFFFFFFFFFFFFFFFFFFFFF
FFFFFFFFFFFFFFFFFFFFFFFFFFFFFFFFFFFFFFFFFFFFFFFFFFFFFFFFFFFFFFFFFFFFFFFFF:
@A00155:342:HHGFNDSXY:1:1312:3233:10629 1:N:0:GAACCTAG+TCCGCATA
TGCCGAGAGGGATGTGGAGGGCGAGAGAGAGCGACTTCTCTCGGGCCCACAGCCTTACAGCTGTGGAG
CACGGTATCCTCTGCCGAAACAGAGGTTGGACAAGACCGGAGGGGTCTCCTAGTTCCAAAGGAGATGT
+
FFFFFFFFFFFFFFF:FF,FFFF:FFFFFFF,FFFFFFFFFFFFFFFFFFFFFFFFFFFFFFFFFFFFF
FFFFFFFFFFFFFFFFFFFFFFFFFFFFFFFFFFFFFFFFFFFFFFFFFFFFFFFFFFFFFFFFFFFFFFFFF
@A00155:342:HHGFNDSXY:1:1312:14769:30452 1:N:0:GAACCTAG+TCCGCATA
CTTCTCTCGGGCCCACAGCCTTACAGCTGTGGAGCACGGTATCCTCTGCCGAAACAGAGGTTGGACAA
GACCGGAGGGGTCTCCTAGTTCCAAAGGAGATGTACTCCGGGCTTGTTACGACCTACCGTGTAAGTC
+
FFFF,FFFFFFFFFFFFFFFFFFFFFFFFFFFFFFFFFFFFFFFFFFFFFFFFFFFFFFFFFFFFFFFFFFFF
FFFFFFFFFFFFFFFFFFFFFFFFFFFFFFFFFFFFFFFFFFFFFFFFFFFFFFFFFFFFFFFFFFFFFFFFF
@A00155:342:HHGFNDSXY:1:1312:9579:36401 1:N:0:GAACCTAG+TCCGCATA
GCGACTTCTCTCGGGCCCACAGCCTTACAGCTGTGGAGCACGGTATCCTCTGCCGAAACAGAGGTTGG
ACAAGACCGGAGGGGTCTCCTGGTTCCAAAGGAGATGTACTCCGGGCTTGTTACGACCTACCG
+
,FFF:F,FF,F::,,FFF:FF,FF,FFFF,FFFFFFFF,FFF,,,FFFFF::F:FFFF:F:FF,:F,F
:FFFF::FFFF,FFFF,FF,F:FFF:FF:FF:F,F:F:F,F,FFFFF::FFF:F:FF:FF:F
@A00155:342:HHGFNDSXY:1:1312:29414:36746 1:N:0:GAACCTAG+TCCGCATA
GGATGTGGAGGGCGAGAGAGAGCGACTTCTCTCGGGCCCACAGCCTTACAGCTGTGGAGCACGGTATC
CTCTGCCGAAACAGAGGTTGGACAAGACCGGAGGGGTCTCCTAGTTCCAAAGGAGATGTACTCC
```

[illegible]



@A00155:342:HHGFNDSXY:1:1315:18973:23046 1:N:0:GAACCTAG+TCCGCATA  
GGATGTGGAGGGCGAGAGAGAGCGACTTCTCTCGGGCCACAGCCTTACAGCTGTGGAGCACGGTATC  
CTCTGCCGAAACAGAGGTTGGACAAGACCGGAGGGGTCTCCTGGTTCCAAAGGAGATGTACTCC

[illegible]

@A00155:342:HHGFNDSXY:1:1315:18285:26334 1:N:0:GAACCTAG+TCCGCATA  
ACTTCTCTCGGGCCACAGCCTTACAGCTGTGGAGCACGGTATCCTCTGCCGAAACAGAGGTTGGACA  
AGACCGGAGGGGTCTCCTAGTTCCAAAGGAGATGTACTCCGGGCTTGTTACGACCTACCGTGTAAGT

[illegible]

@A00155:342:HHGFNDSXY:1:1315:23900:27790 1:N:0:GAACCTAG+TCCGCATA  
GAGCGACTTCTCTCGGGCCCACAGCCTTACAGCTGTGGAGCACGGTATCCTCTGCCGAAACAGAGGTT  
GGACAAGACCGGAGGGGTCTCCTAGTTCCAAAGGAGATGTACTCCGGGCTTGTTACGACCTACCGTG

[illegible]

```

FFFFFFFFFFFFFFFFFFFFFFFFFFFFFFFFFFFFFFFFFFFFFFFFFFFFFFFFFFFFFFFF:FFFFFFFFFFFFFFFFFFFFFFF
@A00155:342:HHGFNDSXY:1:1315:25409:32158 1:N:0:GAACCTAG+TCCGCATA

```

CTCTGCCGAAACAGAGGTTGGACAAGACCGGAGGGGTCTCCTAGTTCCAAAGGAGATGTACTCCGGGC  
TTGTTACGACCTACCGTGTAAGTCGTAGTCTAGTAGGCTACCTGACGAGTCTTTTTTAGGACGAAAC

[illegible]

```

FFFFFFFFFFFFFFFFFFFFFFFFFFFFFFFFFFFFFFFFFFFFFFFFFFFFFFFFFFFFFFFF:FFFFFFFFFFFFFFFFFFFFFFFFFFFFFFFF:FFFFFFFF
@A00155:342:HHGFNDSXY:1:1315:1615:36605 1:N:0:GAACCTAG+TCCGCATA

```

AAGGCGAGAGAGAGCGACTTCTCTCGGGCCCACAGCCTTACAGCTGTGGAGCACGGTATCCTCTGCCG  
AAACAGAGGTTGGACAAGACCGGAGGGGTCTCCTAGTTCAAAGGAGATGTACTCCGGGCTTGTTCAC

```

+
FFFFFFFFFFFFFFFFFFFFFFFF:FFFFFFFFF,F,,,FFFFFF,FFFF::F:FFFFFFFFFFFF:FFFF

```

```
@A00155:342:HHGFNDSXY:1:1316:31656:2926 1:N:0:GAACCTAG+TCCGCATA
```

AGAGAGAGCGACTTCTCTCGGGCCCCACAGCCCTACAGCTGTGGAGCACGGTATCTCTGCCGAAACAG  
AGGTTGGACAAGACCGGAGGGGTCTCCTAGTTCCAAAGGAGATGTACTCCGGACTTGTTTCACGACCTA

[illegible]

@A00155:342:HHGFNDSXY:1:1316:30418:2942 1:N:0:GAACCTAG+TCCGCATA  
 CCGACGACACCGCCGCTTACATCAGCTCTCTCCACTTAAGCACTCAGCTCTCCGCTATCTCATCTCAAT

CCCACCACACCGCCTTAGATCAGCTGTGTCCACTTAAGGACTCACCCTCTGGCCTATGGTCATCTCAAT  
GCCGAGAGGGATGTGGAGGGCGAGAGAGAGCGACTTCTCTCGGGCCACAGCCTTACAGCTGTGGAGC

```

FFFFFFFFFFFFFFFFFFFFFFFF:FFFFFFFFFFFFFFFFFFFFFFFFFFFFFFFFFFFFFFFF:FFFFFFFFFFFF
E.FFFFFFFFFF.FFFFFFFFFFFFFFFFFFFFFFFF.FFFFFFFFFFFFFFFFFFFFFFFFFFFFFF.FFFFFFFFFF.FF

```

@A00155:342:HHGFNDSDXY:1:1316:6759:35336 1:N:0:GAACCTAG+TCCGCATA  
CCCCACAGCCTTACAGCTGTGGAGCACGGTATCCTCTGCCCGAAACAGAGGTTGGACAAGACCGGAGGGG

CCCCACAGCCCTACAGCTCTGGAGCAGCGGTATCCCTCTGCCGAACACAGAGGTTCGACAAAGACCCGAGGGG  
TCTCCTAGTTCCAAAGGAGATGTACTCCGGGCTTGTTTCACGACCTACCGTGTAAGTCGTAGTCTAGTA

[illegible]

@A00155:342:HHGFNDSDY:1:1317:17101:2550 1:N:0:GAACCTAG+TCCGCATA  
AGCGACTTCTCTCGGGCCACAGCCTTACAGCTGTGGAGCACGGTATCCTCTGCCGAAACAGAGGTTG

GACAAGACCGGAGGGGTCTCCTAGTTCCAAAGGAGATGTACTCCGGGCTTGTTACGACCTACCGTGT  
+

[illegible]

@A00155:342:HHGFNDSXY:1:1317:19036:6402 1:N:0:GAACCTAG+TCCGCATA  
GAGCGACTTCTCTCGGGCCCCACAGCCTTACAGCTGTGGAGCACGGTATCCTCTGCCGAAACAGAGGTT  
GGACAAGACCGGAGGGGTCTCCTGGTTCAAAGGAGATGTACTCCGGGCTTGTTACGACCTACCGTG  
+  
FFFFFFFFFFFFFFFFFFFFFFFFFFFFFFFFFFFFFFFFFFFFFFFFFFFFFFFFFFFFFFFFFFFFFFFFFFFFF  
FFFFFFFFFFFFFFFFFFFFFFFFFFFFFFFFFFFFFFFFFFFFFFFFFFFFFFFFFFFFFFFFFFFFFFFFFFFFF  
@A00155:342:HHGFNDSXY:1:1317:20229:6527 1:N:0:GAACCTAG+TCCGCATA  
GAGCGACTTCTCTCGGGCCCCACAGCCTTACAGCTGTGGAGCACGGTATCCTCTGCCGAAACAGAGGTT  
GGACAAGACCGGAGGGGTCTCCTGGTTCAAAGGAGATGTACTCCGGGCTTGTTACGACCTACCGTG  
+  
FFFFFFFFFFFFFFFFFFFFFFFFFFFFFFFFFFFFFFFFFFFFFFFFFFFFFFFFFFFFFFFFFFFFFFFFFFFFF  
FFFFFFFFFFFFFFFFFFFFFFFFFFFFFFFFFFFFFFFFFFFFFFFFFFFFFFFFFFFFFFFFFFFFFFFFFFFFF:F:F  
@A00155:342:HHGFNDSXY:1:1317:14651:8641 1:N:0:GAACCTAG+TCCGCATA  
GAGCGACTTCTCTCGGGCCCCACAGCCTTACAGCTGTGGAGCACGGTATCCTCTGCCGAAACAGAGGTT  
GGACAAGACCGGAGGGGTCTCCTAGTTCAAAGGAGATGTACTCCGGGCTTGTTACGACCTACCGTG  
+  
FFFFFFFFFFFFFFFFFFFFFFFFFFFFFFFFFFFFFFFFFFFFFFFFFFFFFFFFFFFFFFFFFFFFFFFFFFFFF  
FFFFFFFFFFFFFFFFFFFFFFFFFFFFFFFFFFFFFFFFFFFFFFFFFFFFFFFFFFFFFFFFFFFFFFFFFFFFF:F:F  
@A00155:342:HHGFNDSXY:1:1317:29369:10645 1:N:0:GAACCTAG+TCCGCATA  
TGCCGAGAGGGATGTGGAGGGCGAGAGAGAGCGACTTCTCTCGGGCCCCACAGCCTTACAGCTGTGGAG  
CACGGTATCCTCTGCCGAAACAGAGGTTGGACAAGACCGGAGGGGTCTCCTGGTTCAAAGGAGATGT  
+  
FFFFFFFFFFFFFFFFFFFFFFFFFFFFFFFFFFFFFFFFFFFFFFFFFFFFFFFFFFFFFFFFFFFFFFFFFFFFF  
FFFFFFFFFFFFFFFFFFFFFFFFFFFFFFFFFFFFFFFFFFFFFFFFFFFFFFFFFFFFFFFFFFFFFFFFFFFFF  
@A00155:342:HHGFNDSXY:1:1317:23628:14418 1:N:0:GAACCTAG+TCCGCATA  
CGACTTCTCTCGGGCCCCACAGCCTTACAGCTGTGGAGCACGGTATCCTCTGCCGAAACAGAGGTTGGA  
CAAGACCGGAGGGGTCTCCTAGTTCAAAGGAGATGTACTCCGGGCTTGTTACGACCTACCGTGTA  
+  
FFFFFFFFFFFFFFFFFFFFFFFFFFFFFFFFFFFFFFFFFFFFFFFFFFFFFFFFFFFFFFFFFFFFFFFFFFFFF  
FFFFFFFFFFFFFFFFFFFFFFFFFFFFFFFFFFFFFFFFFFFFFFFFFFFFFFFFFFFFFFFFFFFFFFFFFFFFF  
@A00155:342:HHGFNDSXY:1:1317:21052:14465 1:N:0:GAACCTAG+TCCGCATA  
ATGCCGAGAGGGATGTAGAGGGCGAGAGAGAGCGACTTCTCTCGGGCCCCACAGCCTTACAGCTGTGGA  
GCACGGTATCCTCTGCCGAAACAGAGGTTGGACAAGACCGGAGGGGTCTCCTAGTTCAAAGGAGATG  
+  
FFFFFFFFFFFFFFFFFFFFFFFFFFFFFFFFFFFFFFFFFFFFFFFFFFFFFFFFFFFFFFFFFFFFFFFFFFFFF  
FFFFFFFFFFFFFFFFFFFFFFFFFFFFFFFFFFFFFFFFFFFFFFFFFFFFFFFFFFFFFFFFFFFFFFFFFFFFF  
@A00155:342:HHGFNDSXY:1:1317:8983:14606 1:N:0:GAACCTAG+TCCGCATA  
CTTCTCTCGGGCCCCACAGCCTTACAGCTGTGGAGCACGGTATCCTCTGCCGAAACAGAGGTTGGACAA  
GACCGGAGGGGTCTCCTAGTTCAAAGGAGATGTACTTCGGGCTTGTTACGACCTACCGTGTAAGTC  
+  
FFFFFFFFFFFFFFFFFFFFFFFFFFFFFFFFFFFFFFFFFFFFFFFFFFFFFFFFFFFFFFFFFFFFFFFFFFFFF  
FFFFFFFFFFFFFFFFFFFFFFFFFFFFFFFFFFFFFFFFFFFFFFFFFFFFFFFFFFFFFFFFFFFFFFFFFFFFF:F:F  
@A00155:342:HHGFNDSXY:1:1318:22968:4789 1:N:0:GAACCTAG+TCCGCATA  
CTCTGGCCTATGGTCATCTCAATGCCGAGAGGGATGTGAAGGGCGAGAGAGAGCGACTTCTCTCGGGC  
CCACAGCCTTACAGCTGTGGAGCACGGTATCCTCTGCCGAAACAGAGGTTGGACAAGACCGGAGGGGT  
+  
FFFFFFFFFFFFFFFFFFFFFFFFFFFFFFFFFFFFFFFFFFFFFFFFFFFFFFFFFFFFFFFFFFFFFFFFFFFFF  
FFFFFFFFFFFFFFFFFFFFFFFFFFFFFFFFFFFFFFFFFFFFFFFFFFFFFFFFFFFFFFFFFFFFFFFFFFFFF  
@A00155:342:HHGFNDSXY:1:1318:32796:21872 1:N:0:GAACCTAG+TCCGCATA  
AGAGAGCGACTTCTCTCGGGCCCCACAGCCTTACAGCTGTGGAGCACGGTATCCTCTGCCGAAACAGAG  
GTTGGACAAGACCGGAGGGGTCTCCTGGTTCAAAGGAGATGTACTCCGGGCTTGTTACGACCTACC

```
@A00155:342:HHGFNDSXY:1:1319:21197:3349 1:N:0:GAACCTAG+TCCGCATA  
TGGTCACTC AATGCCGAGAGGGATGTGGAGGGCGAGAGAGAGCGACTTCTCTCGGGCCCCACAGCCTT  
ACAGCTGTGGAGCACGGTATCCTCTGCCGAAACAGAGGTTGGACAAGACCGGAGGGGTCTCCTAGTTC  
+  
FFFFFFFFFFFFFFFFFFFFF:FFFFFFFFFFFFFFFFFFFFFFFFFFFFFFFFFFFFFFFFFFFFFFFFFFFFFFF  
FFFFFFFFFFFFFFFFFFFFFFFFFFFFFFFFFFFFFFFFFFFFFFFFFFFFFFFFFFFFFFFFFFFFFFFFFFFFF  
@A00155:342:HHGFNDSXY:1:1319:12807:8140 1:N:0:GAACCTAG+TCCGCATA  
AGCGACTTCTCTCGGGCCCACAGCCTTACAGCTGTGGAGCACGGTATCCTCTGCCGAAACAGAGGTTG  
GACAAGACCGGAGGGGTCTCCTAGTTC CAAAGGAGATGTACTCCGGGCTTGTTACGACCTACCGTGT  
+  
FFFFFFFFFFFFFFFFFFFFFFFFFFFFFFFFFFFFFFFFFFFFFFFFFFFFFFFFFFFFFFFFFFFFFFFFFFFFF  
FFFFFFFFFFFFFFFFFFFFFFFFFFFFFFFFFFFFFFFFFFFFFFFFFFFFFFFFFFFFFFFFFFFFFFFFFFFFF  
@A00155:342:HHGFNDSXY:1:1320:12029:13088 1:N:0:GAACCTAG+TCCGCATA  
GAGCGACTTCTCTCGGGCCCACAGCCTTACAGCTGTGGAGCACGGTATCCTCTGCCGAAACAGAGGTT  
GGACAAGACCGGAGGGGTCTCCTAGTTC CAAAGGAGATGTACTCCGGGCTTGTTACGACCTACCGTGT  
+  
FFFFFFFFFFFFFFFFFFFFFFFFFFFFFFFFFFFFFFFFFFFFFFFFFFFFFFFFFFFFFFFFFFFFFFFFFFFFF  
FFFFFFFFFFFFFFFFFFFFFFFFFFFFFFFFFFFFFFFFFFFFFFFFFFFFFFFFFFFFFFFFFFFFFFFFFFFFF  
@A00155:342:HHGFNDSXY:1:1320:17734:17769 1:N:0:GAACCTAG+TCCGCATA  
CTTCTCTCGGGCCCACAGCCTTACAGCTGTGGAGCACGGTATCCTCTGCCGAAACAGAGGTTGGACAA  
GACCGGAGGGGTCTCCTAGTTC CAAAGGAGATGTACTCCGGGCTTGTTACGACCTACCGTGTAA G  
+  
FFFFFFFFFFFFFFFFFFFFFFFFFFFFFFFFFFFFFFFFFFFFFFFFFFFFFFFFFFFFFFFFFFFFFFFFFFFFF  
FFFFFFFFFFFFFFFFFFFFFFFFFFFFFFFFFFFFFFFFFFFFFFFFFFFFFFFFFFFFFFFFFFFFFFFFFFFFF  
@A00155:342:HHGFNDSXY:1:1320:5023:18208 1:N:0:GAACCTAG+TCCGCATA  
CTTCTCTCGGGCCCACAGCCTTACAGCTGTGGAGCACGGTATCCTCTGCCGAAACAGAGGTTGGACAA  
GACCGGAGGGGTCTCCTAGTTC CAAAGGAGATGTACTCCGGGCTTGTTACGACCTACCGTGTAA GT C  
+  
FFFFFFFFFFFFFFFFFFFFFFFFFFFF:FFFFFFFFF:FFFFFFFFFFFFFFF,FFFFFFFFFFFFFFFFFFFFF  
FFFFFFFFFFFFFFFFFFFFFFFFFFFFFFFFFFFFFFFFFFFFFFFFFFFFFFFFFFFFFFFFFFFFFFFFFFFFF  
@A00155:342:HHGFNDSXY:1:1320:31259:20525 1:N:0:GAACCTAG+TCCGCATA  
ACTTACACGGTAGGTGCTGAACAAGCCCGAGTACATCTCCTTTGGA ACTAGGAGACCCTCCGGTCT  
TG TCCAACCTCTGTTTTCGGCAGAGGATAACCGTGCTCCACAGCTGTACGGCTGTGGGCCCGAGAGAAGT  
+  
FF:FFFFFF::FFFFF:FFFFFFFFFFFFFFFFFFF:FFF:F,F,FFFFF:FF:FFFFFFFFFFFFFFFFF:  
FFFFFFFFFFFFFFFFFFFF:,FF:FFF,FFFFFF,:FFFFFFFFF::FF,:FFFFFFFF,FF:FF:F:FF::  
@A00155:342:HHGFNDSXY:1:1320:17282:21778 1:N:0:GAACCTAG+TCCGCATA  
AGCGACTTCTCTCGGGCCCACAGCCTTACAGCTGTGGAGCACGGTATCCTCTGCCGAAACAGAGGTTG  
GACAAGACCGGAGGGGTCTCCTGGTT CCAAAGGAGATGTACTCCGGGCTTGTTACGACCTACCGTGT  
+  
FFFFFFFFF:FFFFFFFFFFFFFFFFFFFFFFFFFFFFFFFFFFFFFFFFFFFFFFFFFFFFFFFFFFFFFFFFFFFFF  
FFFFFFFFFFFFFFFFFFFFFFFFFFFFFFFFFFFFFFFFFFFFFFFFFFFFFFFFFFFFFFFFFFFFFFFFFFFFF  
@A00155:342:HHGFNDSXY:1:1320:23032:23437 1:N:0:GAACCTAG+TCCGCATA  
TTCTCTCGGGCCCACAGCCTTACAGCTGTGGAGCACGGTATCCTCTGCCGAAACAGAGGTTGGACAAG  
ACCGGAGGGGTCTCCTAGTTCCTAAGGAGATGTACTCCGGGCTTGTTACGACCTACCGTGTAA GT CG  
+  
FFFFFFFFFFFFFFFFFFFFFFF,FFFFFFFFFFFFFFFFFFFFFFFFFFFFFFFFFFFFFFFFFFFFFFFFFFFFF:FFFFFFFFFFFFFFF  
FFFFFFFFFFFFFFFFFFFFFFFFFFFFFFFFFFFFFFFFFFFFFFFFFFFFFFFFFFFFFFFFFFFFFFFFFFFFF  
@A00155:342:HHGFNDSXY:1:1320:23782:24205 1:N:0:GAACCTAG+TCCGCATA  
TTCTCTCGGGCCCACAGCCTTACAGCTGTGGAGCACGGTATCCTCTGCCGAAACAGAGGTTGGACAAG  
ACCGGAGGGGTCTCCTAGTTCCTAAGGAGATGTACTCCGGGCTTGTTACGACCTACCGTGTAA GT CG  
+
```

[illegible]

+  
F  
+  
FFF:  
+  
F::FF,  
F:FFFFFFFFFFF::FFFFFFFFFF:FFFF:FFF,F,: ,FFFF:F, : ,FFFF:FFF,FF,FFFF:FFF,  
F:FFFFFFFFFFFFFF::FFFFFFFFFF:FFFF:FFFF:FFF,FFFFFFFF,FFFFFFFFFFFFFFF  
@A00155:342:HHGFNDSXY:1:1324:30924:15311 1:N:0:GAACCTAG+TCCGCATA  
ACTTCTCTCGGGCCCACAGCCTTACAGCTGTGGAGCACGGTATCCTCTGCCGAAACAGAGGTTGGACA  
AGACCGGAGGGGTCTCCTAGTTCAAAGGAGATGTACTCCGGGCTTGTTACGACCTACCGTGTAAGT  
+  
FFFFFFFFFFFFFFFFFFFFFFF, :FFFFFFFFFFFFFFFFFFFFFFFFFFFFFFFFFFFFFFFFFFFFFFFFF  
FFFFFFFFFFFFFFFFFFFFFFFFFFFFFFFFFFFFFFFFFFFFFFFFFFFFFFFFFFFFFFFFFFFFFFFFF  
@A00155:342:HHGFNDSXY:1:1324:31521:19633 1:N:0:GAACCTAG+TCCGCATA  
GGATGTGGAGGGCGAGAGAGAGCGACTTCTCTCGGGCCCACAGCCTTACAGCTGTGGAGCACGGTATC  
CTCTGCCGAAACAGAGGTTGGACAAGACCGGAGGGGTCTCCTAGTTCAAAGGAGATGTACTCC  
+  
FFFFFFFFFFFFFFFFFFFFFFFFFFFFFFFFFFFFFFFFFFFFFFFFF:FFFFFFFFFFFFFFFFFFFFFFFFF  
FFFFFFFFFFFFFFFFFFFFFF:FFFFFFFFFFFFFFFFFFFFFFFFF, FFFFFFFFFFFFFFFF:FFFFF  
@A00155:342:HHGFNDSXY:1:1324:4300:22592 1:N:0:GAACCTAG+TCCGCATA  
GTCATCTCAATGCCGAGAGGGATGTAGAGGGCGAGAGAGAGCGACTTCTCTCGGGCCCACAGCCTTAC  
AGCTGTGGAGCACGGTATCCTCTGCCGAAACAGAGGTTGGACAAGACCGGAGGGGTCTCCTAGTTCCA  
+  
FFFFFFFFFFFFFFFFFFFFFFFFFFFFFFFFFFFFFFFFFFFFFFFFF:FFFFFFFFFFFFFFFFFFFFFFFFF  
FFFFFFFFFFFFFFFFFFFFFFFFFFFFFFFFFFFFFFFFFFFFFFFFF:FFFFFFFFFFFFFFFFFFFFFFFFF:FFFF  
@A00155:342:HHGFNDSXY:1:1324:16767:27117 1:N:0:GAACCTAG+TCCGCATA  
GCGACTTCTCTCGGGCCCACAGCCTTACAGCTGTGGAGCACGGTATCCTCTGCCGAAACAGAGGTTGG  
ACAAGACCGGAGGGGTCTCCTGGTTCAAAGGAGATGTACTCCGGGCTTGTTACGACCTACCG  
+  
FFFFFFFFFFFFFFFFFFFFFFFFFFFFFFFFFFFFFFFFFFFFFFFFF:FFFFFFFFFFFFFFFFFFFFFFFFF  
FFFFFFFFFFFFFFFFFFFFFFFFFFFFFFFFFFFFFFFFFFFFFFFFF:FFFFFFFFFFFFFFFFFFFFFFFFF:FFF  
@A00155:342:HHGFNDSXY:1:1325:16541:20995 1:N:0:GAACCTAG+TCCGCATA  
GAGCGACTTCTCTCGGGCCCACAGCCTTACAGCTGTGGAGCACGGTATCCTCTGCCGAAACAGAGGTT  
GGACAAGACCGGAGGGGTCTCCTGGTTCAAAGGAGATGTACTCCGGGCTTGTTACGACCTACCGTG

[illegible]

@A00155:342:HHGFNDSXY:1:1327:26964:8672 1:N:0:GAACCTAG+TCCGCATA  
CTCTGCCGAAACAGAGGTTGGACAAGACCGGAGGGGTCTCCTAGTTCCAAAGGAGATGTACTCCGGGC  
TTGTTACGACCTACCGTGTAAGTCGTAGTCTAGTAGGCTACCTGACGAGTCCTTTTTAGGACGAAAC  
+  
FFFFFFFFFFFFFFFFFFFFFFFFFFFFFFFFFFFFFFFFFFFFFFFFFFFFFFFFFFFFFFFFFFFFFFFF,FFFFFFFFFFFFFFFFFFFF  
FFFFFFFFFFFFFFFFFFFFFFFFFFFFFFFFFFFFFFFFFFFFFFFFFFFFFFFFFFFFFFFFFFFFFFFFFFFFFFFF  
@A00155:342:HHGFNDSXY:1:1327:5014:17848 1:N:0:GAACCTAG+TCCGCATA  
ACTTCTCTCGGGCCACAGCCTTACAGCTGTGGAGCACGGTATCCTCTGCCGAAACAGAGGTTGGACA  
AGACCGGAGGGGTCTCCTAGTTCCAAAGGAGATGTACTCCGGGCTTGTTACGACCTACCGTGTAAGT  
+  
FFFFFFFFFFFFFFFFFFFFFFFFFFFFFFFFFFFFFFFFFFFFFFFFFFFFFFFFFFFFFFFFFFFFFFFF:FFFFF::FFFFFFFFFFFFFFFFFFFFFFFFFFFFFFFF  
FFFFFFFFFFFFFFFFFFFFFFFFFFFFFFFFFFFFFFFFFFFFFFFFFFFFFFFFFFFFFFFFFFFFFFFF:FFFFFFFFFFFFFFFFFFFFFFFFFFFFFFFF:FF  
@A00155:342:HHGFNDSXY:1:1327:30572:25504 1:N:0:GAACCTAG+TCCGCATA  
CTGGCCTATGGTCATCTCAATGCCGAGAGGGATGTGGAGGGCGAGAGAGAGCGACTTCTCTCGGGCCC  
ACAGCCTTACAGCTGTGGAGCACGGTATCCTCTGCCGAAACAGAGGTTGGACAAGACCGGAGGGGTCT  
+  
FFFFFFFFFFFFFFFFFFFFFFFFFFFFFFFFFFFFFFFF,FFF,FFFFFFFFFFFFFFFFFFFFFFFFFFFFFFFF:FFFFF:FFFFFFFF  
FFFFFFFF:F:FFFF:FFFFFFFFFFFFFFFFFFFFFFFFFFFFFFFF:F:FFFFFFFFFFFFFFFFFFFFFFFFFFFFFFFF  
@A00155:342:HHGFNDSXY:1:1327:24813:32722 1:N:0:GAACCTAG+TCCGCATA  
CTCTGGCCTATGGTCATCTCAATGCCGAGAGGGATGTAGAGGGCGAGAGAGAGCGACTTCTCTCGGGC  
CCACAGCCTTACAGCTGTGGAGCACGGTATCCTCTGCCGAAACAGAGGTTGGACAAGACCGGAGGGGT  
+  
FFFFFFFFFFFFFFFFFFFFFFFFFFFFFFFFFFFFFFFFFFFFFFFFFFFFFFFFFFFFFFFFFFFFFFFF:FFF:FFFFFFFFFFFFFFFFFFFFFFFFFFFFFFFF  
FFFFFFFFFFFFFFFFFFFFFFFFFFFFFFFFFFFFFFFFFFFFFFFFFFFFFFFFFFFFFFFFFFFFFFFFFFFFFFFF  
@A00155:342:HHGFNDSXY:1:1327:25446:32753 1:N:0:GAACCTAG+TCCGCATA  
CTCTGGCCTATGGTCATCTCAATGCCGAGAGGGATGTAGAGGGCGAGAGAGAGCGACTTCTCTCGGGC  
CCACAGCCTTACAGCTGTGGAGCACGGTATCCTCTGCCGAAACAGAGGTTGGACAAGACCGGAGGGGT  
+  
FFFFFFFFFFFFFFFFFFFFFFFFFFFFFFFFFFFFFFFFFFFFFFFFFFFFFFFFFFFFFFFFFFFFFFFF,FFFFFFFFFFFFFFFFFFFFFFFFFFFFFFFF  
FFFFFFFFFFFFFFFFFFFFFFFFFFFFFFFFFFFFFFFFFFFFFFFFFFFFFFFFFFFFFFFFFFFFFFFFFFFFFFFF  
@A00155:342:HHGFNDSXY:1:1327:26096:33348 1:N:0:GAACCTAG+TCCGCATA  
GAGCGACTTCTCTCGGGCCACAGCCTTACAGCTGTGGAGCACGGTATCCTCTGCCGAAACAGAGGTT  
GGACAAGACCGGAGGGGTCTCCTAGTTCCAAAGGAGATGTACTCCGGGCTTGTTACGACCTACCGTG  
+  
,FFF:FFFFFFFF:FFFFFFFFFFFFFFFF:,,F,F,FFFFFFFFFFFFFFFF:F:FFFFFFFF:FF  
:FFFF,FFFFFFFF::FFF,FFF:FF:FFFFFFFFFFFFFFFFFFFFFFFF:FFFFFFFFFFFFFFFF:F,F,:  
@A00155:342:HHGFNDSXY:1:1328:22263:8077 1:N:0:GAACCTAG+TCCGCATA  
GTCCACTTAAGGACTCACCTCTGGCCTATGGTCATCTCAATGCCGAGAGGGATGTAGAGGGCGAGAGA  
GAGCGACTTCTCTCGGGCCACAGCCTTACAGCTGTGGAGCACGGTATCCTCTGCCGAAACAGAG  
+  
FFF,:,F,FFFFFFFFFFFFFFFF,FFFFFFFF:FFFFFFFF:FFFFFFFF:FFFFFFFF:FFFF:FFFFFF  
FFFFFFFF:F:FFFFFFFF:FFFFFFFFFFFFFFFF:FFFFFFFF:FFF:FFFFFFFF:FFFF:  
@A00155:342:HHGFNDSXY:1:1328:19723:18991 1:N:0:GAACCTAG+TCCGCATA  
CTTCTCTCGGGCCACAGCCTTACAGCTGTGGAGCACGGTATCCTCTGCCGAAACAGAGGTTGGACAA  
GACCGGAGGGGTCTCCTAGTTCCAAAGGAGATGTACTCCGGGCTTGTTACGACCTACCGTGTAAGTC  
+  
FFFFFFF:F:FFFFFFFFFFFFFFFFFFFFFFFFFFFFFFFFFFFFFFFFFFFFFFFFFFFFFFFF:FFFFFF:FFFF  
FFFFFFFFFFFFFFFFFFFFFFFFFFFFFFFF:FFFFFFFFFFFF:FFFFFFFF:F:FFFF:FFFF:FFF  
@A00155:342:HHGFNDSXY:1:1328:5909:21652 1:N:0:GAACCTAG+TCCGCATA  
GGATGTGGAGGGCGAGAGAGAGCGACTTCTCTCGGGCCACAGCCTTACAGCTGTGGAGCACGGTATC  
CTCTGCCGAAACAGAGGTTGGACAAGACCGGAGGGGTCTCCTAGTTCCAAAGGAGATGTACTCC  
+  
FFFFF:FFFFFFFFFFFFFFFFFFFFFFFFFFFFFFFFFFFFFFFFFFFFFFFFFFFFFFFFFFFFFFFFFFFF  
FFFFFFFFFFFFFFFFFFFFFFFFFFFFFFFF:FFFFFFFFFFFF:FFFFFFFF:F:FFFF:FFFF:FFF  
@A00155:342:HHGFNDSXY:1:1328:5909:21652 1:N:0:GAACCTAG+TCCGCATA  
GGATGTGGAGGGCGAGAGAGAGCGACTTCTCTCGGGCCACAGCCTTACAGCTGTGGAGCACGGTATC  
CTCTGCCGAAACAGAGGTTGGACAAGACCGGAGGGGTCTCCTAGTTCCAAAGGAGATGTACTCC





@A00155:342:HHGFNDSXY:1:1330:21043:2362 1:N:0:GAACCTAG+TCCGCATA  
CTCAATGCCGAGAGGGATGTGGAGGGCGAGAGAGAGCGACTTCTCTCGGGCCCACAGCCTTACAGCTG  
TGGAGCACGGTATCCTCTGCCGAAACAGAGGTTGGACAAGACCGGAGGGGTCTCCTAGTTCCAAAGGA  
+  
FFFFFFFFFFFFFFFFFFFFFFFF,FFFFFFFFFFFFFFFF:FFFFFFFFFFFFFFFFFFFFFFFF  
FFFFFFFFFFFFFFFFFFFFFFFFFFFFFFFFFFFFFFFFFFFFFFFFFFFFFFFFFFFFFFFF:FFFFF  
@A00155:342:HHGFNDSXY:1:1330:24397:24173 1:N:0:GAACCTAG+TCCGCATA  
GGATGTAGAGGGCGAGAGAGAGCGACTTCTCTCGGGCCCACAGCCTTACAGCTGTGGAGCACGGTATC  
TCTGCCGAAACAGAGGTTGGACAAGACCGGAGGGGTCTCCTAGTTCCAAAGGAGATGTACTCC  
+  
FFFFFFFFFFFFFFFFFFFFFFFFFFFFFFFFFFFFFFFF,FFFFFFFFFFFFFFFF:FFFFFFFFFFFFFFF  
F:FFFFFFFFFFFFFFFFFFFFFFFF:FFFFFFFFFFFFFFFFFFFFFFFFFFFFFFFFFFFFFFFF  
@A00155:342:HHGFNDSXY:1:1330:5023:36495 1:N:0:GAACCTAG+TCCGCATA  
GAGAGGGATGTAGAGGGCGAGAGAGAGCGACTTCTCTCGGGCCCACAGCCTTACAGCTGTGGAGCACG  
GTATCCTCTGCCGAAACAGAGGTTGGACAAGACCGGAGGGGTCTCCTAGTTCCAAAGGAGATGTACTC  
+  
FFF,FFFFFFFFFFFFFFFFFFFFFFFFFFFFFFFFFFFFFFFFFFFFFFFFFFFFFFFF:FFFFFFFFFFF  
FFFFFFFFFFFFFFFFFFFFFFFFFFFFFFFFFFFFFFFFFFFFFFFFFFFFFFFFFFFFFFFFFFFFFFFF  
@A00155:342:HHGFNDSXY:1:1331:11822:9408 1:N:0:GAACCTAG+TCCGCATA  
CTCTGGCCTATGGTCATCTCAATGCCGAGAGGGATGTGGAGGGCGAGAGAGAGCGACTTCTCTCGGGC  
CCACAGCCTTACAGCTGTGGAGCACGGTATCCTCTGCCGAAACAGAGGTTGGACAAGACCGGAGGGGT  
+  
FFFFFFFFFFFFFFFFFFFFFFFFFFFFFFFFFFFFFFFFFFFFFFFFFFFFFFFFFFFFFFFFFFFFFFFF  
FFFF:FFFFFFFFFFFFFFFFFFFFFFFFFFFFFFFFFFFFFFFFFFFFFFFFFFFFFFFF:FFFFFFFFFFF  
@A00155:342:HHGFNDSXY:1:1331:31783:10473 1:N:0:GAACCTAG+TCCGCATA  
GATCAGCTGTGTCCACTTAAGGACTCACCTCTGGCCTATGGTCATCTCAATGCCGAGAGGGATGTGGA  
GGGCGAGAGAGAGCGACTTCTCTCGGGCCCACAGCCTTACAGCTGTGGAGCACGGTATCCTCTGCCGA  
+  
FFFFFFFFFFFFFFFFFFFFFFFFFFFFFFFFFFFFFFFFFFFFFFFFFFFFFFFFFFFFFFFFFFFFFFFF  
FFFFFFFFFFFFFFFFFFFFFFFFFFFFFFFFFFFFFFFF:FFFFFFFFFFFFFFFF:FFFFFFFFFFFFFFF  
@A00155:342:HHGFNDSXY:1:1331:31919:10614 1:N:0:GAACCTAG+TCCGCATA  
GATCAGCTGTGTCCACTTAAGGACTCACCTCTGGCCTATGGTCATCTCAATGCCGAGAGGGATGTGGA  
GGGCGAGAGAGAGCGACTTCTCTCGGGCCCACAGCCTTACAGCTGTGGAGCACGGTATCCTCTGCCGA  
+  
FFFFFFFFFFFFFFFFFFFFFFFFFFFFFFFFFFFFFFFFFFFFFFFF,FFFFFFFFFFFFFFFF:FFFFF  
FFFFFFFFFFFFFFFFFFFFFFFFFFFFFFFFFFFFFFFF:FFFFFFFFFFFFFFFFFFFFFFFFFFFFFFF  
@A00155:342:HHGFNDSXY:1:1332:23656:9079 1:N:0:GAACCTAG+TCCGCATA  
ATGCCCCGCCACACCGCCTTAGATCAGCTGTGTCCACTTAAGGACTCACCTCTGGCCTATGGTCATCT  
CAATGCCGAGAGGGATGTGGAGGGCGAGAGAGAGCGACTTCTCTCGGGCCCACAGCCTTACAGCTGTG  
+  
FFFFFFFFFFFFFFFFFFFFFFFFFFFFFFFFFFFFFFFFFFFFFFFF,FFFFFFFFFFFFFFFF:FFFFFFFF  
FFFFFFFFFFFFFFFF,FFFFFFFFFFFFFFFFFFFFFFFFFFFFFFFFFFFFFFFFFFFFFFFF  
@A00155:342:HHGFNDSXY:1:1332:25337:11647 1:N:0:GAACCTAG+TCCGCATA  
AGGCCAGAGGTGAGTCCTTAAGTGGACACAGCTGATCTAAGGCGGTGTGGCGGGGCATGGGTTTGAAC  
CCCCATGACGGTCGAGTCTAGTAGGCTCCCTGATGAGTCCGTTCCAAGGACGAAACCGTCGTTACTC  
+  
FFFFFFFFFFFFFFFFFFFFFFFFFFFFFFFFFFFFFFFFFFFFFFFFFFFFFFFFFFFFFFFFFFFFFFFF  
FFFFFFFFFFFFFFFFFFFFFFFFFFFFFFFFFFFFFFFFFFFFFFFFFFFFFFFFFFFFFFFF,FFFFFFFFFFFF  
@A00155:342:HHGFNDSXY:1:1332:30725:19382 1:N:0:GAACCTAG+TCCGCATA  
CGAGAGAGAGCGACTTCTCTCGGGCCCACAGCCTTACAGCTGTGGAGCACGGTATCCTCTGCCGAAAC  
AGAGGTTGGACAAGACCGGAGGGGTCTCCTAGTTCCAAAGGAGATGTACTCCGGGCTTGTTCCAGACC  
+  
FFFFFFF:FFFFFFFFFFFFFFFF: :FFFFFFFF:FF:FFFF:FFFFFFFFFFFFFFFF:FFFFFFFFF  
FFFFFFFFFFFFFFFF:FFFFFFFFFFFFFFFF:FFFFFF:FFFFFF:FFFFFFFFFFFFFFFF,FFFFF

[illegible]

@A00155:342:HHGFNDSXY:1:1335:25102:7983 1:N:0:GAACCTAG+TCCGCATA  
GAGCGACTTCTCTCGGGCCCCACAGCCTTACAGCTGTGGAGCACGGTATCCTCTGCCGAAACAGAGGTT  
GGACAAGACCGGAGGGGTCTCCTAGTTCCAAAGGAGATGTACTCCGGGCTTGTTACGACCTACCGTG  
+  
FFFFFFFFFFFFFFFFFFFFFFFFFFFFFFFFFFFFF:FFFFFFFFF:FFFFFFF:FFFFFFFFFFFFFFFFFFFFF  
FFFFFFFFFFFFFFFFFFFFFFFFFFFFF::FF:FFF,FFFFFFFFFFFFFFFFFFFFFFFFFFFFFFFFFFFFF  
@A00155:342:HHGFNDSXY:1:1335:10321:14325 1:N:0:GAACCTAG+TCCGCATA  
GATGTGGAGGGCGAGAGAGAGCGACTTCTCTCGGGCCCCACAGCCTTACAGCTGTGGAGCACGGTATCC  
TCTGCCGATACAGAGGTTGGACAAGACCGGAGGGGTCTCCTAGTTCCAAAGGAGATGTACTCCGGGCT  
+  
FFFFFFFFFFFFFFFFFFFFFFFFFFFFFFFFFFFFF:FFFFFFFFFFFFFFFFFFFFFFFFFFFFFFFFFFFFF  
FFFFFFFFFFFFFFFFFFFFFFFFFFFFFFFFFFFFF:FFFFFFFFFFFFFFFFFFFFFFFFFFFFFFFFFFFFF  
@A00155:342:HHGFNDSXY:1:1336:25825:4069 1:N:0:GAACCTAG+TCCGCATA  
AGCGACTTCTCTCGGGCCCCACAGCCTTACAGCTGTGGAGCACGGTATCCTCTGCCGAAACAGAGGTTG  
GACAAGACCGGAGGGGTCTCCTAGTTCCAAAGGAGATGTACTCCGGGCTTGTTACGACCTACCGTGT  
+  
FFFFFFFFFFFFFFFFFFFFFFFFFFFFFFFFFFFFF:FFFFFFFFFFFFFFFFFFFFFFFFFFFFFFFFFFFFF  
FFFFFFFFFFFFFFFFFFFFFFFFFFFFFFFFFFFFF:FFFFFFFFFFFFFFFFFFFFFFFFFFFFFFFFFFFFF  
@A00155:342:HHGFNDSXY:1:1336:14850:4946 1:N:0:GAACCTAG+TCCGCATA  
GCGACTTCTCTCGGGCCCCACAGCCTTACAGCTGTGGAGCACGGTATCCTCTGCCGAAACAGAGGTTGG  
ACAAGACCGGAGGGGTCTCCTAGTTCCAAAGGAGATGTACTCCGGGCTTGTTACGACCTACCGTGTA  
+  
FFFFFFFFFFFFFFFFFFFFFFFFFFFFFFFFFFFFF:FFFFFFFFF:FFFFFFF  
FFFFFFFFFFFFFFFFFFFFFFFFFFFFFFFFFFFFF:FFFFFFFFFFFFFFFFFFFFFFFFFFFFFFFFFFFFF:F:F  
@A00155:342:HHGFNDSXY:1:1336:24062:9095 1:N:0:GAACCTAG+TCCGCATA  
TTAGATCAGCTGTGTCCACTTAAGGACTCACCTCTGGCCTATGGTCATCTCAATGCCGAGAGGGATGT  
AGAGGGCGAGAGAGAGCGACTTCTCTCGGGCCCCACAGCCTTACAGCTGTGGAGCACGGTATCCTCTGC  
+  
:FFFFFFFFFFFFFFFFFFFFFFFFF:FFFFFFFFFFFFFFFFFFFFFFFFFFFFFFFFFFFFFFFFFFFFF  
FFFFFFFFFFFFFFFFFFFFFFFFFFFFF:FFFFFFFFF,FFFFFFFFFFFFFFFFFFFFFFFFFFFFF  
@A00155:342:HHGFNDSXY:1:1336:17481:17957 1:N:0:GAACCTAG+TCCGCATA  
GAGGGCGAGAGAGAGCGACTTCTCTCGGGCCCCACAGCCTTACAGCTGTGGAGCACGGTATCCTCTGCC  
GAAACAGAGGTTGGACAAGACCGGAGGGGTCTCCTAGTTCCAAAGGAGATGTACTCCGGGCTTGTTCA  
+  
FFFFFFFFFFFFFFFFFFFFFFFFFFFFFFFFFFFFF:FFFFFFFFFFFFFFFFFFFFFFFFFFFFFFFFFFFFF  
FFFFFFFFFFFFFFFFFFFFFFFFFFFFF:FFFFFFFFFFFFFFFFFFFFFFFFFFFFFFFFFFFFFFFFFFFFF  
@A00155:342:HHGFNDSXY:1:1336:16875:24925 1:N:0:GAACCTAG+TCCGCATA  
TTCTCTCGGGCCCCACAGCCTTACAGCTGTGGAGCACGGTATCCTCTGCCGAAACAGAGGTTGGACAAG  
ACCGGAGGGGTCTCCTAGTTCCAAAGGAGATGTACTCCGGGCTTGTTACGACCTACCGTGTAAGTCG  
+  
F:FFFFF:F:FFFFFFFFFFFFFFFFFFFFFFFFF:FFFFFFFF:FFFFFFFFFFFFFFFFFFFFFFFFFFFFF  
FFFFFFFFFFFFFFFFFFFFFFFFFFFFF:FFFFFFFFFFFFFFFFFFFFF::FFFFFFFFFFFFFFFFFFFFF::FFF  
@A00155:342:HHGFNDSXY:1:1337:14814:3630 1:N:0:GAACCTAG+TCCGCATA  
CTCTGGCCTATGGTCATCTCAATGCCGAGAGGGATGTGAAGGGCGAGAGAGAGCGACTTCTCTCGGGC  
CCACAGCCTTACAGCTGTGGAGCACGGTATCCTCTGCCGAAACAGAGGTTGGACAAGACCGGAGGGGT  
+  
FFFFFFFFFFFFFFFFFFFFF:FFFFFFFFFFFFF:F,FFFFFFFFFFFFFFFFFFFFFFFFFFFFFFFFFFFFF  
FFFFFFFFFFFFF:FFFFFFFFFFFFFFFFFFFFFFFFFFFFFFFFFFFFF:FFFFFFFFFFFFFFFFFFFFF  
@A00155:342:HHGFNDSXY:1:1337:10945:5854 1:N:0:GAACCTAG+TCCGCATA  
CTTCTCTCGGGCCCCACAGCCTTACAGCTGTGGAGCACGGTATCCTCTGCCGAAACAGAGGTTGGACAA  
GACCGGAGGGGTCTCCTAGTTCCAAAGGAGATGTACTCCGGGCTTGTTACGACCTACCGTGTAAGTC  
+  
FFFFFFFFFFFFFFFFFFFFF:FFFFFFFFFFFFFFFFFFFFFFFFFFFFFFFFFFFFF:FF  
F:FFFFFFFFFFFFFFFFFFFFF,FFFFF:FFFFFFFFFFFFFFFFFFFFFFFFFFFFFFFFFFFFF,FFF

```
@A00155:342:HHGFNDSXY:1:1337:22598:13322 1:N:0:GAACCTAG+TCCGCATA  
ACCTCTGTTTCGGCAGAGGATACCGTGCTCCACAGCTGTAAAGGCTGTGGGCCCGAGAGAAGTCGCTCT  
CTCTCGCCCTTCACATCCCTCTCGGCATTGAGATGACCATAGGCCAGAGGTGAGTCCTTAAGTGGACA  
+  
FFFFFFFFFFFFFFFFFFFFFFFFFFFFFFFFFFFFFFFFFFFFFFFFFFFFFFFFFFFFFFFFFFFFF  
FFFFFFFFFFFFFFFFFFFFFFFFFFFFFFFFFFFFFFFFFFFFFFFFFFFFFFFFFFFFFFFFFFFF:  
@A00155:342:HHGFNDSXY:1:1337:19361:25504 1:N:0:GAACCTAG+TCCGCATA  
AGAGAGAGCGACTTCTCTCGGGCCCACAGCCTTACAGCTGTGGAGCACGGTATCCTCTGCCGAAACAG  
AGGTTGGACAAGACCGGAGGGGTCTCCTGGTTCCAAAGGAGATGTACTCCGGGCTTGTTACGACCTA  
+  
FFFFFFFFFFFFFFFFFFFFFFFFFFFFFFFFFFFFFFFFFFFFFFFFFFFFFFFFFFFFFFFFFFFFF  
FFFFFFFFFFFFFFFFFFFFFFFFFFFFFFFFFFFFFFFFFFFFFFFFFFFFFFFFFFFFFFFFFFFF:  
@A00155:342:HHGFNDSXY:1:1337:1859:30107 1:N:0:GAACCTAG+TCCGCATA  
CTTCTCTCGGGCCCACAGCCTTACAGCTGTGGAGCACGGTATCCTCTGCCGAAACAGAGGTTGGACAA  
GACCGGAGGGGTCTCCTAGTTCCAAAGGAGATGTACTCCGGGCTTGTTACGACCTACCGTGTAAGTC  
+  
FFFFFFFFFFFFFFFFFFFFFFFFFFFFFFFFFFFFFFFFFFFFFFFFFFFFFFFFFFFFFFFFFFFFF,  
FFFFFFFFFFFFFFFFFFFFFFFFFFFFFFFFFFFFFFFFFFFFFFFFFFFFFFFFFFFFFFFFFFFF,  
@A00155:342:HHGFNDSXY:1:1337:24713:34460 1:N:0:GAACCTAG+TCCGCATA  
GTCATCTCAATGCCGAGAGGGATGTGGAGGGCGAGAGAGAGCGACTTCTCTCGGGCCCACAGCCTTAC  
AGCTGTGGAGCACGGTATCCTCTGCCGAAACAGAGGTTGGACAAGACCGGAGGGGTCTCCTAGTTCCA  
+  
FFFFFFFFFFFFFFFFFFFFFFFFFFFFFFFFFFFFFFFFFFFFFFFFFFFFFFFFFFFFFFFFFFFF:  
FFFFFFFFFFFFFFFFFFFFFFFFFFFFFFFFFFFFFFFFFFFFFFFFFFFFFFFFFFFFFFFFFFFF,  
@A00155:342:HHGFNDSXY:1:1337:11143:35916 1:N:0:GAACCTAG+TCCGCATA  
CATCTCAATGCCGAGAGGGATGTGGAGGGCGAGAGAGAGCGACTTCTCTCGGGCCCACAGCCTTACAG  
CTGTGGAGCACGGTATCCTCTGCCGAAACAGAGGTTGGACAAGACCGGAGGGGTCTCCTGGTTCCAAA  
+  
FFFFFFFFFFFFFFFFFFFFFFFFFFFFFFFFFFFFFFFFFFFFFFFFFFFFFFFFFFFFFFFFFFFF:  
FFFFFFFFFFFFFFFFFFFFFFFFFFFFFFFFFFFFFFFFFFFFFFFFFFFFFFFFFFFFFFFFFFFF:  
@A00155:342:HHGFNDSXY:1:1338:11388:30765 1:N:0:GAACCTAG+TCCGCATA  
ATCTCAATGCCGAGAGGGATGTGGAGGGCGAGAGAGAGCGACTTCTCTCGGGCCCACAGCCTTACAGC  
TGTGGAGCACGGTATCCTCTGCCGAAACAGAGGTTGGACAAGACCGGAGGGGTCTCCTAGTTCCAAAG  
+  
FFFFFFFFFFFFFF:F:FFFFFFFFFFFFFFFFFFFFFFFFFFFFFFFFFFFFFFFFFFFFFFFFFFFFF  
FFFFFFFFFFFFFFFFFFFFFFFFFFFFFFFFFFFFFFFFFFFFFFFFFFFFFFFFFFFFFFFFFFFF:  
@A00155:342:HHGFNDSXY:1:1339:29432:5932 1:N:0:GAACCTAG+TCCGCATA  
ATCTCAATGCCGAGAGGGATGTAGAGGGCGAGAGAGAGCGACTTCTCTCGGGCCCACAGCCTTACAGC  
TGTGGAGCACGGTATCCTCTGCCGAAACAGAGGTTGGACAAGACCGGAGGGGTCTCCTAGTTCCAAAG  
+  
FFFFFFFFFFFFFFFFFFFFFFFFFFFFFFFFFFFFFFFFFFFFFFFFFFFFFFFFFFFFFFFFFFFF:  
FFFFFFFFFFFFFFFFFFFFFFFFFFFFFFFFFFFFFFFFFFFFFFFFFFFFFFFFFFFFFFFFFFFF:  
@A00155:342:HHGFNDSXY:1:1339:19976:7560 1:N:0:GAACCTAG+TCCGCATA  
AGCGACTTCTCTCGGGCCCACAGCCTTACAGCTGTGGAGCACGGTATCCTCTGCCGAAACAGAGGTTG  
GACAAGACCGGAGGGGTCTCCTAGTTCCAAAGGAGATGTACTCCGGGCTTGTTACGACCTACCGTGT  
+  
FFFFFFFFFFFFFFFFFFFFFFFFFFFFFFFFFFFFFFFFFFFFFFFFFFFFFFFFFFFFFFFFFFFF:  
FFFFFFFFFFFFFFFFFFFFFFFFFFFFFFFFFFFFFFFFFFFFFFFFFFFFFFFFFFFFFFFFFFFF:  
@A00155:342:HHGFNDSXY:1:1339:23656:8703 1:N:0:GAACCTAG+TCCGCATA  
CTCAATGCCGAGAGGGATGTGGAGGGCGAGAGAGAGCGACTTCTCTCGGGCCCACAGCCTTACAGCTG  
TGGAGCACGGTATCCTCTGCCGAAACAGAGGTTGGACAAGACCGGAGGGGTCTCCTAGTTCCAAAGGA  
+
```

+

+

+

+

+

+

+

+

 $\perp$ 

\_\_\_\_\_

[illegible]

```
@A00155:342:HHGFNDSXY:1:1342:13286:24220 1:N:0:GAACCTAG+TCCGCATA  
ACCTCTGTTTCGGCAGAGGATACCGTGCTCCACAGCTGTAAAGGCTGTGGGCCCGAGAGAAGTCGCTCT  
CTCTCGCCCTCCACATCCCTCTCGGCATTGAGATGACCATAGGCCAGAGGAGAGTCCTTAAGTGGACA  
+  
FFFFFFFFFFFFFFFFFFFFFFFFFFFFFFFFFFFFFFFFFFFFFFFFFFFFFFFFFFFFFFFFFFFFF  
FFFFFFFFFFFFFFFFFFFFFFFFFFFFFFFFFFFFFFFFFFFFFFFFFFFFFFFFFFFFFFFFFFFF:  
@A00155:342:HHGFNDSXY:1:1343:12481:17973 1:N:0:GAACCTAG+TCCGCATA  
GAGAGGGATGTGGAGGGCGAGAGAGAGCGACTTCTCTCGGGCCCACAGCCTTACAGCTGTGGAGCACG  
GTATCCTCTGCCGAAACAGAGGTTGGACAAGACCGGAGGGGTCTCCTAGTTCAAAGGAGATGTACTC  
+  
FFFFFFFFFFFFFFFFFFFFFFFFFFFFFFFFFFFFFFFFFFFFFFFFFFFFFFFFFFFFFFFFFFFFF  
FFFFFFFFFFFFFFFFFFFFFFFFFFFFFFFFFFFFFFFFFFFFFFFFFFFFFFFFFFFFFFFFFFFF:  
@A00155:342:HHGFNDSXY:1:1343:11831:18912 1:N:0:GAACCTAG+TCCGCATA  
GAGAGGGATGTGGAGGGCGAGAGAGAGCGACTTCTCTCGGGCCCACAGCCTTACAGCTGTGGAGCACG  
GTATCCTCTGCCGAAACAGAGGTTGGACAAGACCGGAGGGGTCTCCTAGTTCAAAGGAGATGTACTC  
+  
FFFFFFFFFFFFFFFFFFFFFFFFFFFFFFFFFFFFFFFFFFFFFFFFFFFFFFFFFFFFFFFFFFFFF  
FFFFFFFFFFFFFFFFFFFFFFFFFFFFFFFFFFFFFFFFFFFFFFFFFFFFFFFFFFFFFFFFFFFF:  
@A00155:342:HHGFNDSXY:1:1344:19253:7686 1:N:0:GAACCTAG+TCCGCATA  
TAGATCAGCTGTGTCCA CT TAAGGACTCACCTCTGGCCTATGGTCATCTCAATGCCGAGAGGGATGT  
GGAAGGCGAGAGAGAGCGACTTCTCTCGGGCCCACAGCCTTACAGCTGTGGAGCACGGTATCCTCTGC  
+  
FFFFFFFFFFFFFFFFFFFFFFFFFFFFFFFFFFFFFFFFFFFFFFFFFFFFFFFFFFFFFFFFFFFFF  
FFFFFFFFFFFFFFFFFFFFFFFFFFFFFFFFFFFFFFFFFFFFFFFFFFFFFFFFFFFFFFFFFFFF:  
@A00155:342:HHGFNDSXY:1:1344:30020:12743 1:N:0:GAACCTAG+TCCGCATA  
CTTCTCTCGGGCCCACAGCCTTACAGCTGTGGAGCACGGTATCCTCTGCCGAAACAGAGGTTGGACAA  
GACCGGAGGGGTCTCCTAGTTCAAAGGAGATGTACTCCGGGCTTGTTACACGACCTACCGTGTAAGTC  
+  
FFFFFFFFFFFFFFFFFFFFFFFFFFFFFFFFFFFFFFFFFFFFFFFFFFFFFFFFFFFFFFFFFFFFF  
FFFFFFFFFFFFFFFFFFFFFFFFFFFFFFFFFFFFFFFFFFFFFFFFFFFFFFFFFFFFFFFFFFFF:  
@A00155:342:HHGFNDSXY:1:1344:11623:34272 1:N:0:GAACCTAG+TCCGCATA  
CGAGAGGGATGTGGAGGGCGAGAGAGAGCGACTTCTCTCGGGCCCACAGCCTTACAGCTGTGGAGCAC  
GGTATCCTCTGCCGAAACAGAGGTTGGACAAGACCGGAGGGGTCTCCTAGTTCAAAGGAGATGTACT  
+  
FF:F::FFFFFFFFFFFFFFFFFFFFFFFFFFFFFFFFFFFFFFFFFFFFFFFFFFFFFFF:FFFFFF,FF::FFF:FFFFFFFF  
FFFFFFFF:FFFFFFFFFFFFFF,FF:FFFFFF:FFFFFFFFFFFFFFFFFFFF:FFFFFFFFFFFFFFFFFFFF  
@A00155:342:HHGFNDSXY:1:1345:18548:3490 1:N:0:GAACCTAG+TCCGCATA  
TCGGCAGAGGATAACCGTGCTCCACAGCTGTAAAGGCTGTGGGCCCGAGAGAAGTCGCTCTCTCTCGCCC  
TCCACATCCCTCTCGGCATTGAGATGACCATAGGCCAGAGGTGAGTCCTTAAGTGGACACA  
+  
FFFFFFFFFFFFFFFFFFFFFFFFFFFFFFFFFFFFFFFFFFFFFFFFFFFFFFFFFFFFFFFFFFFFF  
FFFFFFFFFFFFFFFFFFFFFFFFFFFFFFFFFFFFFFFFFFFFFFFFFFFFFFFFFFFFFFFFFFFF:  
@A00155:342:HHGFNDSXY:1:1345:30825:21652 1:N:0:GAACCTAG+TCCGCATA  
TTCTCTCGGGCCCACAGCCTTACAGCTGTGGAGCACGGTATCCTCTGCCGAAACAGAGGTTGGACAAG  
ACCGGAGGGGTCTCCTAGTTCAAAGGAGATGTACTCCGGGCTTGTTACACGACCTACCGTGTAAGTCG  
+  
FFFFFFFFFFFFFFFFFFFFFFFFFFFFFFFFFFFFFFFFFFFFFFFFFFFFFFF:F,FFFFFFFFFFFFFFFFFFFFFFFFF:  
FFFFFFFFFFFFFFFF:F FFF:FFFFFFFFFFFFFFFFFFFFFFFFFFFFFFFFFFFF:FFFFFFFFFFFFFFFFFFFF  
@A00155:342:HHGFNDSXY:1:1345:23529:27618 1:N:0:GAACCTAG+TCCGCATA  
CTATGGTCATCTCAATGCCGAGAGGGATGTGGAGGGCGAGAGAGAGCGACTTCTCTCGGGCCCACAGC  
CTTACAGCTGTGGAGCACGGTATCCTCTGCCGAAACAGAGGTTGGACAAGACCGGAGGGGTCTCCTGG  
+  
FFFFFFFFFFFFFFFFFFFFFFFFFFFFFFFFFFFFFFFFFFFFFFFFFFFFFFFFFFFFFFFFFFFFF  
FFFFFFFFFFFFFFFFFFFFFFFFFFFFFFFFFFFFFFFFFFFFFFFFFFFFFFFFFFFFFFFFFFFF:  
@A00155:342:HHGFNDSXY:1:1345:23529:27618 1:N:0:GAACCTAG+TCCGCATA
```

@A00155:342:HHGFNDSXY:1:1345:24288:28307 1:N:0:GAACCTAG+TCCGCATA  
CTCAATGCCGAGAGGGATGTAGAGGGCGAGAGAGAGCGACTTCTCTCGGGCCCACAGCCTTACAGCTG  
TGGAGCACGGTATCCTCTGCCGAAACAGAGGTTGGACAAGACCGGAGGGGTCTCCTAGTTCCAAAGGA  
+  
FFFFFFFFFFFF:FFFFFFFFFFFFFFFFFFFFFFFFFFFFFFFFFFFFFFFFFFFFFFFFFFFFFFFFFFFFF  
FFFFFFFFFFFFFFFFFFFFFFFFFFFFFFFFFFFFFFFFFFFFFFFFFFFFFFFFFFFFFFFFFFFFFFFFFFFF  
@A00155:342:HHGFNDSXY:1:1345:22028:32440 1:N:0:GAACCTAG+TCCGCATA  
CTCAATGCCGAGAGGGATGTAGAGGGCGAGAGAGAGCGACTTCTCTCGGGCCCACAGCCTTACAGCTG  
TGGAGCACGGTATCCTCTGCCGAAACAGAGGTTGGACAAGACCGGAGGGGTCTCCTAGTTCCAAAGGA  
+  
FFFFFFFFFFFFFFFFFFFFFFFFFFFFFFFFFFFFFFFFFFFFFFFFFFFFFFFFFFFFFFFFFFFFFFFFFFFF  
FFFFFFFFFFFFFFFFFFFFFFFFFFFFFFFFFFFFFFFFFFFFFFFFFFFFFFFFFFFFFFFFFFFFFFFFFFFF  
@A00155:342:HHGFNDSXY:1:1345:12156:36354 1:N:0:GAACCTAG+TCCGCATA  
AGGGCGAGAGAGAGCGACTTCTCTCGGGCCCACAGCCTTACAGCTGTGGAGCACGGTATCCTCTGCCG  
AAACAGAGGTTGGACAAGACCGGAGGGGTCTCCTAGTTCCAAAGGAGATGTACTCCGGGCTTGTTTAC  
+  
FFFFFFFFFFFFFFFFFFFFFFFFFFFFFFFFFFFFFFFFFFFFFFFFFFFFFFFFFFFFFFFFFFFFFFFFFFFF  
FFFFFFFFFFFFFFFFFFFFFFFFFFFFFFFFFFFFFFFFFFFFFFFFFFFFFFFFFFFFFFFFFFFFFFFFFFFF  
@A00155:342:HHGFNDSXY:1:1346:19190:5290 1:N:0:GAACCTAG+TCCGCATA  
CTCCTCTGGCCTATGGTCATCTCAATGCCGAGAGGGATGTGGAGGGCGAGAGAGAGCGACTTCTCTCG  
GGCCCACAGCCTTACAGCTGTGGAGCACGGTATCCTCTGCCGAAACAGAGGTTGGACAAGACCGGAGG  
+  
FFFFFFFFFFFFFFFFFFFFFFFFFFFFFFFFFFFFFFFFFFFFFFFFFFFFFFFFFFFFFFFFFFFFFFFFFFFF  
FFFFFFFFFFFFFFFFFFFFFFFFFFFFFFFFFFFFFFFFFFFFFFFFFFFFFFFFFFFFFFFFFFFFFFFFFFFF  
@A00155:342:HHGFNDSXY:1:1346:12735:18004 1:N:0:GAACCTAG+TCCGCATA  
AGGACTCACCTCTGGCCTATGGTCATCTCAATGCCGAGAGGGATGTGAAGGGCGAGAGAGAGCGACTT  
CTCTCGGGCCCACAGCCTTACAGCTGTGGAGCACGGTATCCTCTGCCGAAACAGAGGTTGGACAAGAC  
+  
FFFFFFFFFFFFFFFFFFFFFFFFFFFFFFFFFFFFFFFFFFFFFFFFFFFFFFFFFFFFFFFFFFFFFFFFFFFF  
FFFFFFFFFFFFFFFFFFFFFFFFFFFFFFFFFFFFFFFFFFFFFFFFFFFFFFFFFFFFFFFFFFFFFFFFFFFF  
@A00155:342:HHGFNDSXY:1:1346:28094:20744 1:N:0:GAACCTAG+TCCGCATA  
CTGCCGAAACAGAGGTTGGACAAGACCGGAGGGGTCTCCTAGTTCCAAAGGAGATGTACTCCGGGCTT  
GTTTACGACCTACCGTGTAAGTCGTAGTCTAGTAGGCTACCTGACGAGTCCTTTTTAGGACGAAACTT  
+  
FFFFFFFFFFFFFFFFFFFFFFFFFFFFFFFFFFFFFFFFFFFFFFFFFFFFFFFFFFFFFFFFFFFFFFFFFFFF  
FFFFFFFFFFFFFFFFFFFFFFFFFFFFFFFFFFFFFFFFFFFFFFFFFFFFFFFFFFFFFFFFFFFFFFFFFFFF  
@A00155:342:HHGFNDSXY:1:1346:14552:22216 1:N:0:GAACCTAG+TCCGCATA  
TCTCTCGGGCCCACAGCCTTACAGCTGTGGAGCACGGTATCCTCTGCCGAAACAGAGGTTGGACAAGA  
CCGAGAGGGGTCTCCTAGTTCCAAAGGAGATGTACTCCGGGCTTGTTTACGACCTACCGTGTAAGTCGT  
+  
FFFFFFFFFFFFFFFFFFFFFFFFFFFFFFFFFFFFFFFFFFFFFFFFFFFFFFFFFFFFFFFFFFFFFFFFFFFF  
FFFFFFFFFFFFFFFFFFFFFFFFFFFFFFFFFFFFFFFFFFFFFFFFFFFFFFFFFFFFFFFFFFFFFFFFFFFF  
@A00155:342:HHGFNDSXY:1:1346:9977:30671 1:N:0:GAACCTAG+TCCGCATA  
GGATGTGGAGGGCGAGAGAGAGCGACTTCTCTCGGGCCCACAGCCTTACAGCTGTGGAGCACGGTATC  
CTCTGCCGAAACAGAGGTTGGACAAGACCGGAGGGGTCTCCTGGTTCCAAAGGAGATGTACTCC  
+  
FFFFFFFFFFFFFFFFFFFFFFFFFFFFFFFFFFFFFFFFFFFFFFFFFFFFFFFFFFFFFFFFFFFFFFFFFFFF  
FFFFFFFFFFFFFFFFFFFFFFFFFFFFFFFFFFFFFFFFFFFFFFFFFFFFFFFFFFFFFFFFFFFFFFFFFFFF  
@A00155:342:HHGFNDSXY:1:1347:12147:1110 1:N:0:GAACCTAG+TCCGCATA  
AGGTCATCTCAATGCCGAGAGGGATGTGGAGGGCGAGAGAGAGCGACTTCTCTCGGGCCCACAGCCTT  
ACAGCTGTGGAGCACGGTATCCTCTGCCGAAACAGAGGTTGGACAAGACCGGAGGGGTCTCC  
+  
FFFFFFFFFFFFFFFFFFFFFFFFFFFFFFFFFFFFFFFFFFFFFFFFFFFFFFFFFFFFFFFFFFFFFFFFFFFF  
FFFFFFFFFFFFFFFFFFFFFFFFFFFFFFFFFFFFFFFFFFFFFFFFFFFFFFFFFFFFFFFFFFFFFFFFFFFF  
@A00155:342:HHGFNDSXY:1:1347:12147:1110 1:N:0:GAACCTAG+TCCGCATA



[illegible]

@A00155:342:HHGFNDSXY:1:1350:5529:8625 1:N:0:GAACCTAG+TCCGCATA  
TATCCTCTGCCGAAACAGAGGTTGGACAAGACCGGAGGGGTCTCCTAGTTCCAAAGGAGATGTACTCC  
GGGCTTGTTCACGACCTACCGTGTAAAGTCGTAGTCTAGTAGGCTACCTGACGAGTCCTTTTAGGACG  
+  
FFFFFFFFFFFFFFFFFFFFFFFFFFFFFFFFFFFFFFFFFFFFFFFFFFFFFFFFFFFFFFFFFFFFFFFF  
FFFFFFFFFFFFFFFFFFFFFFFFFFFFFFFFFFFFFFFFFFFFFFFFFFFFFFFFFFFFFFFFFFFFFFFF  
@A00155:342:HHGFNDSXY:1:1350:24975:10958 1:N:0:GAACCTAG+TCCGCATA  
GCGAGAGAGAGCGACTTCTCTCGGGCCACAGCCTTACAGCTGTGGAGCACGGTATCCTCTGCCGAAA  
CAGAGGTTGGACAAGACCGGAGGGGTCTCCTAGTTCCAAAGGAGATGTACTCCGGGCTTGTTCACGAC  
+  
FFFF:FFFFFFFFFFFFFFFFFFFFFFFFFFFFFFFFFFFFFFFFFFFFFFFFFFFFFFFFFFFFFFFF,FFFF:FFFFFFFF:FFF,FFF  
FFFFFFFFFFFFFFFFFFFFFFFFFFFFFFFFFFFFFFFFFFFFFFFFFFFFFFFFFFFFFFFFFFFFFFFF  
@A00155:342:HHGFNDSXY:1:1350:28293:14137 1:N:0:GAACCTAG+TCCGCATA  
GCTCCACAGCTGTAAGGCTGTGGGCCCGAGAGAAGTCGCTCTCTCTCGCCCTCCACATCCCTCTCGGC  
ATTGAGATGACCATAGGCCAGAGGTGAGTCCTTAAGTGACACAGCTGATCTAAGGCGGTGTGGTGGG  
+  
FFFFFFFFFFFFFFFFFFFFFFFFFFFFFFFFFFFFFFFFFFFFFFFFFFFFFFFFFFFFFFFFFFFFFFFF  
F:FFFFFFFFFFFFFFFFFFFFFFFFFFFFFFFFFFFFFFFFFFFFFFFFFFFFFFFFFFFFFFFFFFFFF  
@A00155:342:HHGFNDSXY:1:1350:11406:20149 1:N:0:GAACCTAG+TCCGCATA  
TCGGCAGAGGATACCGTGCTCCACAGCTGTAAGGCTGTGGGCCCGAGAGAAGTCGCTCTCTCTCGCCC  
TCCACATCCCTCTCGGCATTGAGATGACCATAGGCCAGAGGTGAGTCCTTAAGTGACACA  
+  
FFFFFFFFFFFFFFFFFFFFFFFFFFFFFFFFFFFFFFFFFFFFFFFFFFFFFFFFFFFFFFFFFFFFFFFF  
FFFFFFFFFFFFFFFFFFFFFFFFFFFFFFFFFFFFFFFFFFFFFFFFFFFFFFFFFFFFFFFFFFFFFFFF  
@A00155:342:HHGFNDSXY:1:1350:25916:28432 1:N:0:GAACCTAG+TCCGCATA  
ATCTCAATGCCGAGAGGGATGTGGAGGGCGAGAGAGAGCGACTTCTCTCGGGCCACAGCCTTACAGC  
TGTGGAGCACGGTATCCTCTGCCGAAACAGAGGTTGGACAAGACCGGAGGGGTCTCCTAGTTCCAAAG  
+  
FFFFFFFFFFFFFFF:F:FFFFFFFF:FFFFFFFFFFFFFFFFFFFFFFFFFFFFFFFFFFFFFFFFFFFF  
FFFFFFFF:FFFFFFFFFFFFFFFFFFFFFFFFFFFFFFFFFFFFFFFFFFFFFFFFFFFFFFFFFFFFFFFF  
@A00155:342:HHGFNDSXY:1:1350:17987:36432 1:N:0:GAACCTAG+TCCGCATA  
GATGTGGAGGGCGAGAGAGAGCGACTTCTCTCGGGCCACAGCCTTACAGCTGTGGAGCACGGTATCC  
TCTGCCGAAACAGAGGTTGGACAAGACCGGAGGGGTCTCCTAGTTCCAAAGGAGATGTACTCCGGGCT  
+  
FFFFFFFFFFFFFFFFFFFFFFFFFFFFFFFFFFFFFFFFFFFFFFFFFFFFFFFFFFFFFFFFFFFFFFFF  
FFFFFFFFFFFFFFFFFFFFFFFFFFFFFFFFFFFFFFFFFFFFFFFFFFFFFFFFFFFFFFFFFFFFFFFF  
@A00155:342:HHGFNDSXY:1:1351:8712:2769 1:N:0:GAACCTAG+TCCGCATA  
GGATGTAGAGGGCGAGAGAGAGCGACTTCTCTCGGGCCACAGCCTTACAGCTGTGGAGCACGGTATC  
CTCTGCCGAAACAGAGGTTGGACAAGACCGGAGGGGTCTCCTAGTTCCAAAGGAGATGTACTCC  
+  
FFFFFFFFFFFFFFFFFFFFFFFFFFFFFFFFFFFFFFFFFFFFFFFFFFFFFFFFFFFFFFFFFFFFFFFF  
FFFFFFFFFFFFFFFFFFFFFFFFFFFFFFFFFFFFFFFFFFFFFFFFFFFFFFFFFFFFFFFFFFFFFFFF  
@A00155:342:HHGFNDSXY:1:1351:10854:9048 1:N:0:GAACCTAG+TCCGCATA  
CGACTTCTCTCGGGCCACAGCCTTACAGCTGTGGAGCACGGTATCCTCTGCCGAAACAGAGGTTGGA  
CAAGACCGGAGGGGTCTCCTAGTTCCAAAGGAGATGTACTCCGGGCTTGTTCACGACCTACCGTGTAA  
+  
FFFFFFFFFFFFFFFFFFFFFFFFFFFFFFFFFFFFFFFFFFFFFFFFFFFFFFFFFFFFFFFFFFFFFFFF  
F:FFFFFFFFFFFFFFFFFFFFFFFFFFFFFFFFFFFFFFFFFFFFFFFFFFFFFFFFFFFFFFFFFFFFF  
@A00155:342:HHGFNDSXY:1:1351:9751:15468 1:N:0:GAACCTAG+TCCGCATA  
ATCCTCTGCCGAAACAGAGGTTGGACAAGACCGGAGGGGTCTCCTAGTTCCAAAGGAGATGTACTCCG  
GGCTTGTTCACGACCTACCGTGTAAAGTCGTAGTCTAGTAGGCTACCTGACGAGTCCTTTTAA  
+  
FFFF:FFFFFFFFFFFF,F:F:F:FFFF:F,FFFFFFFF:FFFFF:FFFFF,FFFFF,F,FFF:  
:FFFF:FFFFFFFFFFFF:FFFFF,F:FF:FFFF,:F:FFF:FFF::FFFFFFFFFFFF:FF

@A00155:342:HHGFNDSXY:1:1351:17852:26428 1:N:0:GAACCTAG+TCCGCATA  
TGATCATCTCAATGCCGAGAGGGATGTGGAGGGCGAGAGAGAGCGACTTCTCTCGGGCCCCACAGCCTT  
ACAGCTGTGGAGCACGGTATCCTCTGCCGAAACAGAGGTTGGACAAGACCGGAGGGGTCTCCTAGTTC  
+  
FFFFFFFFFFFFFFFFFFFFFFFFFFFFFFFFFFFFFFFFFFFFFFFFFFFFFFFFFFFFFFFFFFFFFFFFFFFFF  
:FFFFFFFFFFFFFFFFFFFFFFFFFFFFFFFFFFFFFFFFFFFFFFFFFFFFFFFFFFFFFFFFFFFFFFFFFFFF:FFFFF  
@A00155:342:HHGFNDSXY:1:1351:22761:28635 1:N:0:GAACCTAG+TCCGCATA  
ACTTCTCTCGGGCCCACAGCCTTACAGCTGTGGAGCACGGTATCCTCTGCCGAAACAGAGGTTGGACA  
AGACCGGAGGGGTCTCCTAGTTCCAAAGGAGATGTACTCCGGGCTTGTTACGACCTACCGTGTAAGT  
+  
FFFFFFFFFFFFFFFFFFFFFFFFFFFFFFFFFFFFFFFFFFFFFFFFFFFFFFFFFFFFFFFFFFFFFFFFFFFFF  
F:FFFFFFFFFFFFFFFFFFFFFFFFFFFFFFFFFFFFFFFFFFFFFFFFFFFFFFFFFFFFFFFFFFFFFFFFFFFF:  
@A00155:342:HHGFNDSXY:1:1351:26096:33035 1:N:0:GAACCTAG+TCCGCATA  
GAGCGACTTCTCTCGGGCCCACAGCCTTACAGCTGTGGAGCACGGTATCCTCTGCCGAAACAGAGGTT  
GGACAAGACCGGAGGGGTCTCCTAGTTCCAAAGGAGATGTACTCCGGGCTTGTTACGACCTACCGTG  
+  
:FFFFFFFFFFFFFFFFFFFFFFFFFFFFFFFFFFFFFFFFFFFFFFFFFFFFFFFFFFFFFFFFFFFFFFFFFFFF,  
FF:FFF:FF:F:F:F,FFFFFFFFFFFFFFFFFFFF:FFFFFFFFFFFFFFFFFFFF:FF,FFFFFFFFFFFFFFFFFFFF  
@A00155:342:HHGFNDSXY:1:1352:24569:4586 1:N:0:GAACCTAG+TCCGCATA  
GGGCGAGAGAGAGCGACTTCTCTCGGGCCCACAGCCTTACAGCTGTGGAGCACGGTATCCTCTGCCGA  
AACAGAGGTTGGACAAGACCGGAGGGGTCTCCTAGTTCCAAAGGAGATGTACTCCGGGCTTGTTACG  
+  
FFFFFFF:FFFFFF:FFFFFFFFFFFFFFFFFFFFFFFFFFFFFFFFFFFFFFFFFFFFFFFFFFFFF:FFFFFFF:FFFFFF:  
FFFFFFFFFFFFFF:FFFFFFFFFFFFFFFFFFFFF:FFFFFFFFFFFFFFFFFFFFF:FFFFFFF:FF:FFFFFFF:FFFFFFF  
@A00155:342:HHGFNDSXY:1:1352:24505:4726 1:N:0:GAACCTAG+TCCGCATA  
GGGCGAGAGAGAGCGACTTCTCTCGGGCCCACAGCCTTACAGCTGTGGAGCACGGTATCCTCTGCCGA  
AACAGAGGTTGGACAAGACCGGAGGGGTCTCCTAGTTCCAAAGGAGATGTACTCCGGGCTTGTTACG  
+  
FFFFFFFFFFFFFFFFFFFFFFFFFFFFFFFFFFFFFFFFFFFFFFFFFFFFFFFFFFFFFFFFFFFFFFFFFFFFF  
FFFFFFFFFFFFFFFFFFFFFFFFFFFFFFFFFFFFFFFFFFFFFFFFFFFFFFFFFFFFFFFFFFFFFFFFFFFFF:FFFFFFFFFFFFFFFFFFFFF  
@A00155:342:HHGFNDSXY:1:1352:5068:9204 1:N:0:GAACCTAG+TCCGCATA  
GAGGGCGAGAGAGAGCGACTTCTCTCGGGCCCACAGCCTTACAGCTGTGGAGCACGGTATCCTCTGCC  
GAAACAGAGGTTGGACAAGACCGGAGGGGTCTCCTAGTTCCAAAGGAGATGTACTCCGGGCTTGTTCA  
+  
FFF:FFFFFFFFFFFFFFFFFFFF,FFFFF,FFFFFFFFF,FFFFFFFFFFFFFFFFFFFFFFFFFFFFF:FFFFFFF  
FFFFFFFFFFFFFF:FFFFF:FFFFFFFFFFFFFFFFFFFF:FFFFFFF:FF:FFFFFFFFF:FFFFFFF  
@A00155:342:HHGFNDSXY:1:1352:28619:14418 1:N:0:GAACCTAG+TCCGCATA  
GAGCGACTTCTCTCGGGCCCACAGCCTTACAGCTGTGGTGCACGGTATCCTCTGCCGAAACAGAGGTT  
GGACAAGACCGGAGGGGTCTCCTAGTTCCAAAGGAGATGTACTCCGGGCTTGTTACGACCTACCGTG  
+  
FFFFFFFFFFFFFFFFFFFFFFFFFFFFFFFFFFFFFFFFFFFFFFFFFFFFFFFFFFFFFFFFFFFFFFFFFFFFF  
FFFFFFFFFFFFFFFFFFFFFFFFFFFFFFFFFFFFFFFFFFFFFFFFFFFFFFFFFFFFFFFFFFFFFFFFFFFFF:  
@A00155:342:HHGFNDSXY:1:1352:8386:18897 1:N:0:GAACCTAG+TCCGCATA  
GAGCGACTTCTCTCGGGCCCACAGCCTTACAGCTGTGGAGCACGGTATCCTCTGCCGAAACAGAGGTT  
GGACAAGACCGGAGGGGTCTCCTAGTTCCAAAGGAGATGTACTCCGGGCTTGTTACGACCTACCGTG  
+  
FFFFFFFFFFFFFFFFFFFFFFFFFFFFFFFFFFFFFFFFFFFFFFFFFFFFFFFFFFFFFFFFFFFFFFFFFFFFF  
FFFFFFFFFFFFFFFFFFFFFFFFFFFFFFFFFFFFFFFFFFFFFFFFFFFFFFFFFFFFFFFFFFFFFFFFFFFFF:  
@A00155:342:HHGFNDSXY:1:1352:8232:18944 1:N:0:GAACCTAG+TCCGCATA  
GAGCGACTTCTCTCGGGCCCACAGCCTTACAGCTGTGGAGCACGGTATCCTCTGCCGAAACAGAGGTT  
GGACAAGACCGGAGGGGTCTCCTAGTTCCAAAGGAGATGTACTCCGGGCTTGTTACGACCTACCGTG  
+  
FFFFFFFFFFFFFFFFFFFFFFFFFFFFFFFFFFFFFFFFFFFFFFFFFFFFFFFFFFFFFFFFFFFFFFFFFFFFF  
FFFFFFFFFFFFFFFFFFFFFFFFFFFFFFFFFFFFFFFFFFFFFFFFFFFFFFFFFFFFFFFFFFFFFFFFFFFFF:  
@A00155:342:HHGFNDSXY:1:1352:8232:18944 1:N:0:GAACCTAG+TCCGCATA  
GAGCGACTTCTCTCGGGCCCACAGCCTTACAGCTGTGGAGCACGGTATCCTCTGCCGAAACAGAGGTT  
GGACAAGACCGGAGGGGTCTCCTAGTTCCAAAGGAGATGTACTCCGGGCTTGTTACGACCTACCGTG  
+

[illegible]

@A00155:342:HHGFNDSXY:1:1355:31774:29997 1:N:0:GAACCTAG+TCCGCATA

@A00155:342:HHGFNDSXY:1:1355:26765:31344 1:N:0:GAACCTAG+TCCGCATA

@A00155:342:HHGFENDSXY:1:1356:9507:4679 1:N:0:GAACCTAG+TCCGCATA

@A00155:342:HHGFENDSXY:1:1356:19533:11992 1:N:0:GAACCTAG+TCCGCATA

+

@A00155:342:HHGFENDSXY:1:1356:24370:13197 1:N:0:GAACCTAG+TCCGCATA

+

@A00155:342:HHGENDSXY:1:1356:24695:18865 1:N:0:GAACCTAG+TCCGCATA

$$+ \frac{1}{\sqrt{\pi}} \int_0^x \exp(-t^2) dt$$

@A00155:342:HHGENDSYV:1:1356:21206:23907 1:N:0:GAACCTAG+TCCGCATA

+

@A00155:342:HHGFND5XX:1:1357:11216:7764 1:N:0:GAACCTAG+TCCGCATA

ACACCTGTGGACACGGTATCTCTGCCGAAACAGAGGTTGGACAGGACCGGAGGGGTTCTCTCTAGTTTC

\_\_\_\_\_

@A00155:342:HHGFNDSXY:1:1357:29460:14904 1:N:0:GAACCTAG+TCCGCATA  
CCTCTGGCCTATGGTCATCTCAATGCCGAGAGGGATGTGAAGGGCGAGAGAGAGCGACTTCTCTCGGG  
CCCACAGCCTTACAGCTGTGGAGCACGGTATCCTCTGCCGAAACAGAGGTTGGACAAGACCGGA  
+  
FFFFFFFFFFFFFFFFFFFFFFFFFFFFFFFFFFFFFFFFFFFFFFFFFFFFFFFFFFFFFFFFFFFFFFFF  
FFFFFFFFFFFFFFFFFFFFFFFFFFFFFFFFFFFFFFFFFFFFFFFFFFFFFFFFFFFFFFFFFFFFFFFF  
@A00155:342:HHGFNDSXY:1:1357:14633:29841 1:N:0:GAACCTAG+TCCGCATA  
CTCAATGCCGAGAGGGATGTGGAGGGCGAGAGAGAGCGACTTCTCTCGGGCCCACAGCCTTACAGCTG  
TGGAGCACGGTATCCTCTGCCGAAACAGAGGTTGGACAAGACCGGAGGGGTCTCCTAGTTCCAAAGGA  
+  
FFFFFFFFFFFFFFFFFFFFFFFFFFFFFFFFFFFFFFFFFFFFFFFFFFFFFFFFFFFFFFFFFFFFFFFF  
FFFFFFFFFFFFFFFFFFFFFFFFFFFFFFFFFFFFFFFFFFFFFFFFFFFFFFFFFFFFFFFFFFFFFFFF  
@A00155:342:HHGFNDSXY:1:1357:21088:32002 1:N:0:GAACCTAG+TCCGCATA  
GATGTAGAGGGCGAGAGAGAGCGACTTCTCTCGGGCCCACAGCCTTACAGCTGTGGAGCACGGTATCC  
TCTGCCGAAACAGAGGTTGGACAAGACCGGAGGGGTCTCCTAGTTCCAAAGGAGATGTACTCCGGGCT  
+  
FF,F:FFFFFFFFFFFFFFFFFFFFFFFFFFFFFFFFFFFFFFFFFFFFFFFFFFFFFFFFFFFFFFFF  
FFFFFFFFFFFFFFFFFFFFFFFFFFFFFFFFFFFFFFFFFFFFFFFFFFFFFFFFFFFFFFFFFFFFFFFF  
@A00155:342:HHGFNDSXY:1:1357:30644:35650 1:N:0:GAACCTAG+TCCGCATA  
TGCCGAGAGGGATGTGGAGGGCGAGAGAGAGCGACTTCTCTCGGGCCCACAGCCTTACAGCTGTGGAG  
CACAGTATCCTCTGCCGAAACAGAGGTTGGACAAGACCGGAGGGGTCTCCTAGTTCCAAAGGAGATGT  
+  
FFFFFFF:FFFFFF:FFFFFF:FFFFFFFFFFFFFFFFFFFFFFFFFFFFFFFFFFFFFFFFFFFF  
F:FFFFFFFFFFFFFFFFFFFFFFFFFFFFFFFFFFFFFFFFFFFFFFFFFFFFFFFFFFFFFFFFFFFF  
@A00155:342:HHGFNDSXY:1:1358:14190:9502 1:N:0:GAACCTAG+TCCGCATA  
AGGACTCACCTCTGGCCTATGGTCATCTCAATGCCGAGAGGGATGTAGAGGGCGAGAGAGAGCGACTT  
CTCTCGGGCCCACAGCCTTACAGCTGTGGAGCACGGTATCCTCTGCCGAAACAGAGGTTGGACAAGAC  
+  
FFFFFFFFFFFFFFFFFFFFFFFFFFFFFFFFFFFFFFFFFFFFFFFFFFFFFFFFFFFFFFFFFFFFFFFF  
FFFFFFFFFFFFFFFFFFFFFFFFFFFFFFFFFFFFFFFFFFFFFFFFFFFFFFFFFFFFFFFFFFFFFFFF  
@A00155:342:HHGFNDSXY:1:1358:26449:12258 1:N:0:GAACCTAG+TCCGCATA  
GGGCGAGAGAGAGCGACTTCTCTCGGGCCCACAGCCTTACAGCTGTGGAGCACGGTATCCTCTGCCGA  
AACAGAGGTTGGACAAGACCGGAGGGGTCTCCTAGTTCCAAAGGAGATGTACTCCGGGCTTGTTACG  
+  
FFFFFFFFFFFFFFFFFFFFFFFFFFFFFFFFFFFFFFFFFFFFFFFFFFFFFFFFFFFFFFFFFFFFFFFF  
FFFFFFFFFFFFFFFFFFFFFFFFFFFFFFFFFFFFFFFFFFFFFFFFFFFFFFFFFFFFFFFFFFFFFFFF  
@A00155:342:HHGFNDSXY:1:1358:20844:18646 1:N:0:GAACCTAG+TCCGCATA  
ACTTCTCTCGGGCCCACAGCCTTACAGCTGTGGAGCACGGTATCCTCTGCCGAAACAGAGGTTGGACA  
AGACCGGAGGGGTCTCCTGGTTCCAAAGGAGATGTACTCCGGGCTTGTTACGACCTACCGTGTAAGT  
+  
FFFFFFFFFFFFFFFFFFFFFFFFFFFFFFFFFFFFFFFFFFFFFFFFFFFFFFFFFFFFFFFFFFFFFFFF  
FFFFFFFFFFFFFFFFFFFFFFFFFFFFFFFFFFFFFFFFFFFFFFFFFFFFFFFFFFFFFFFFFFFFFFFF  
@A00155:342:HHGFNDSXY:1:1358:15646:26678 1:N:0:GAACCTAG+TCCGCATA  
TGTCCACTTAAGGACTCACCTCTGGCCTATGGTCATCTCAATGCCGAGAGGGATGTGGAGGGCGAGAG  
AGAGCGACTTCTCTCGGGCCCACAGCCTTACAGCTGTGGAGCACGGTATCCTCTGCCGAAACAGAGGT  
+  
FFFFFFFFFFFFFFFFFFFFFFFFFFFFFFFFFFFFFFFFFFFFFFFFFFFFFFFFFFFFFFFFFFFFFFFF  
FFFFFFFFFFFFFFFFFFFFFFFFFFFFFFFFFFFFFFFFFFFFFFFFFFFFFFFFFFFFFFFFFFFFFFFF  
@A00155:342:HHGFNDSXY:1:1358:29758:32643 1:N:0:GAACCTAG+TCCGCATA  
GAGAGGGATGTAGAGGGCGAGAGAGAGCGACTTCTCTCGGGCCCACAGCCTTACAGCTGTGGAGCACG  
GTATCCTCTGCCGAAACAGAGGTTGGACAAGACCGGAGGGGTCTCCTAGTTCCAAAGGAGATGTACTC  
+  
FFFFFFFFFFFFFFFFFFFFFFFFFFFFFFFFFFFFFFFFFFFFFFFFFFFFFFFFFFFFFFFFFFFFFFFF  
FFFFFFFFFFFFFFFFFFFFFFFFFFFFFFFFFFFFFFFFFFFFFFFFFFFFFFFFFFFFFFFFFFFFFFFF  
@A00155:342:HHGFNDSXY:1:1358:29758:32643 1:N:0:GAACCTAG+TCCGCATA  
GAGAGGGATGTAGAGGGCGAGAGAGAGCGACTTCTCTCGGGCCCACAGCCTTACAGCTGTGGAGCACG  
GTATCCTCTGCCGAAACAGAGGTTGGACAAGACCGGAGGGGTCTCCTAGTTCCAAAGGAGATGTACTC  
+  
FFFFFFFFFFFFFFFFFFFFFFFFFFFFFFFFFFFFFFFFFFFFFFFFFFFFFFFFFFFFFFFFFFFFFFFF  
FFFFFFFFFFFFFFFFFFFFFFFFFFFFFFFFFFFFFFFFFFFFFFFFFFFFFFFFFFFFFFFFFFFFFFFF  
@A00155:342:HHGFNDSXY:1:1358:29758:32643 1:N:0:GAACCTAG+TCCGCATA  
GAGAGGGATGTAGAGGGCGAGAGAGAGCGACTTCTCTCGGGCCCACAGCCTTACAGCTGTGGAGCACG  
GTATCCTCTGCCGAAACAGAGGTTGGACAAGACCGGAGGGGTCTCCTAGTTCCAAAGGAGATGTACTC

@A00155:342:HHGFNDSXY:1:1359:8594:5321 1:N:0:GAACCTAG+TCCGCATA  
TGTCCTACTTAAGGACTCACCTCTGGCCTATGGTCATCTCAATGCCGAGAGGGATGTGGAGGGCGAGAG  
AGAGCGACTTCTCTCGGGCCCACAGCCTTACAGCTGTGGAGCACGGTATCCTCTGCCGAAACAGAGGT  
+  
FFFFFFFFFFFFFFFFFFFFFFFFFFFFFFFFFFFFF, FFFFFFFFFFFFFFFFFFFFFFFFFFFFFFFFFFFFFFFF  
FFFFFFFFFFFFFFFFFFFFFFFFFFFFFFFFFFFFFFFFFFFFFFFFFFFFFFFFFFFFFFFFFFFFFFFFFFFF  
@A00155:342:HHGFNDSXY:1:1359:16595:15953 1:N:0:GAACCTAG+TCCGCATA  
CTATGGTCATCTCAATGCCGAGAGGGATGTGGAGGGCGAGAGAGAGCGACTTCTCTCGGGCCCCACAGC  
CTTACAGCTGTGGAGCACGGTATCCTCTGCCGAAACAGAGGTTGGACAAGACCGGAGGGGTCTCCTAG  
+  
FFFFFFFFFFFFFFFFFFFFFFFFFFFFFFFFFFFFFFFFFFFFFFFFFFFFFFFFFFFFFFFFFFFFFFFFFFFF  
FFFFFFFFFFFFFFFFFFFFFFFFFFFFFFFFFFFFFFFFFFFFFFFFFFFFFFFFFFFFFFFFFFFFFFFFFFFF  
@A00155:342:HHGFNDSXY:1:1359:21603:34209 1:N:0:GAACCTAG+TCCGCATA  
ATCTCAATGCCGAGAGGGATGTGGAGGGCGAGAGAGAGCGACTTCTCTCGGGCCCCACAGCCTTACAGC  
TGTGGAGCACGGTATCCTCTGCCGAAACAGAGGTTGGACAAGACCGGAGGGGTCTCCTGTTCCAAAG  
+  
FFFFFFFFFFFFFFFFFFFFFFFFFFFFFFFFFFFFFFFFFFFFFFFFFFFFFFFFFFFFFFFFFFFFFFFFFFFF  
FFFFFFFFFFFFFFFFFFFFFFFFFFFFFFFFFFFFFFFFFFFFFFFFFFFFFFFFFFFFFFFFFFFFFFFFFFFF:  
@A00155:342:HHGFNDSXY:1:1359:14036:36605 1:N:0:GAACCTAG+TCCGCATA  
ACCTCTGTTTCGGCAGAGGATACCGTGCTCCACAGCTGTAAGGCTGTGGGCCCGAGAGAAGTCGCTCT  
CTCTCGCCCTCCACATCCCTCTCGGCATTGAGATGACCATAGGCCAGAGGAGAGTCCTTAAGTGGACA  
+  
FFFFFFFFFFFFFFFFFFFFFFFFFFFFFFFFFFFFFFFFFFFFFFFFFFFFFFFFFFFFFFFFFFFFFFFFFFFF  
FFFFFFFFFFFFFFFFFFFFFFFFFFFFFFFFFFFFFFFFFFFFFFFFFFFFFFFFFFFFFFFFFFFFFFFFFFFF:  
@A00155:342:HHGFNDSXY:1:1360:25220:8406 1:N:0:GAACCTAG+TCCGCATA  
GGATGTGGAGGGCGAGAGAGAGCGACTTCTCTCGGGCCCCACAGCCTTACAGCTGTGGAGCACGGTATC  
CTCTGCCGAAACAGAGGTTGGACAAGACCGGAGGGGTCTCCTAGTTCCAAGGAGATGTACTCC  
+  
FFFFFFFFFFFFFFFFFFFFFFFFFFFFFFFFFFFFFFFFFFFFFFFFFFFFFFFFFFFFFFFFFFFFFFFFFFFF  
FFFFFFFFFFFFFFFFFFFFFFFFFFFFFFFFFFFFFFFFFFFFFFFFFFFFFFFFFFFFFFFFFFFFFFFFFFFF:  
@A00155:342:HHGFNDSXY:1:1360:18394:16752 1:N:0:GAACCTAG+TCCGCATA  
TTACAGCTGTGGAGCACGGTATCCTCTGCCGAAACAGAGGTTGGACAAGACCGGAGGGGTCTCCTAGT  
TCAAAGGAGATGTACTCCGGGCTTGTTACGACCTACCGTGTAAGTCGTAGTCTAGTAGGCTACCTG  
+  
FF: FFFFFFFFFFFFFFFFFFFFFFFFFFFFFFFFFFFFFF, FFFFFFFFFFFFFFFFFFFFFFFFFFFFFFFFFFFF  
FFFFFFFFFFFFFFFFFFFFFFFFFFFFFFFFFFFFFFFFFFFFFFFFFFFFFFFFFFFFFFFFFFFFFFFFFFFF  
@A00155:342:HHGFNDSXY:1:1360:13431:36245 1:N:0:GAACCTAG+TCCGCATA  
CACATCCCTCTCGGCATTGAGATGACCATAGGCCAGAGGTGAGTCCTTAAGTGGACACAGCTGATCTA  
AGGCGGTGTGGCGGGGCATGGGTTTTGAACCCCATGACGGTCGGAGTCTAGTAGGCTCCCTGATGAGT  
+  
FFFFFFFFFFFFFFFFFFFFFFFFFFFFFFFFFFFFFFFFFFFFFFFFFFFFFFFFFFFFFFFFFFFFFFFFFFFF:  
FFFFFFFF: FFFFFFFFFFFFFFFFFFFFFFFFFFFFFFFFFFFFFFFFFFFFFFFFFFFFFFFFFFFFFFFFFFFFF  
@A00155:342:HHGFNDSXY:1:1361:22137:1720 1:N:0:GAACCTAG+TCCGCATA  
AGGGATGTAGAGGGCGAGAGAGAGCGACTTCTCTCGGGCCCCACAGCCTTACAGCTGTGGAGCACGGTA  
TCCTCTGCCGAAACAGAGGTTGGACAAGACCGGAGGGGTCTCCTAGTTCCAAGGAGATGTACTCCG  
+  
FFFFFFF: FFFFFFFFFFFFFFFFFFFFFFFFFFFFFF: FFFFFFFFFFFFFFFFFFFFFFFFFFFFFFFFFFFF  
FFFFFFFF: FFFFFFFFFFFFFFFFFFFFFFFFFFFFFFFFFFFFFFFFFFFFFFFFFFFFFFFFFFFFFFFFFFFFF  
@A00155:342:HHGFNDSXY:1:1361:17788:12383 1:N:0:GAACCTAG+TCCGCATA  
GAGCGACTTCTCTCGGGCCCCACAGCCTTACAGCTGTGGAGCACGGTATCCTCTGCCGAAACAGAGGTT  
GGACAAGACCGGAGGGGTCTCCTAGTTCCAAGGAGATGTACTCCGGGCTTGTTACGACCTACCGTG  
+

[illegible]



@A00155:342:HHGFNDSXY:1:1362:1488:36730 1:N:0:GAACCTAG+TCCGCATA  
 TCCACTTAAGGACTCACCTCTGGCCTATGGTCATCTCAATGCCGAGAGGGATGTGAAGGGCGAGAGAG  
 AGCGACTTCTCTCGGGCCACAGCCTTACAGCTGTGGAGCACGGTATCCTCTGCCGAAACAGAGGTTG  
 +  
 FFFFFFFFFFFFFFFFFFFFFFFFFF,FFFFF:FFFFFFFFFFFFFFFFFFFFFFFFFFFFFFFFFFFFFFFF  
 FFFFF:FFFF:FFFF:FF:FFFFFFFFFFFFFFFFFFFFFFFFFFFFFFFFFFFFFFFFFFFFFFFFFFFF  
 @A00155:342:HHGFNDSXY:1:1363:20347:12054 1:N:0:GAACCTAG+TCCGCATA  
 GCCCCGCCACACCGCCTTAGATCAGCTGTGTCCACTTAAGGACTCACCTCTGGCCTATGGTCATCTCA  
 ATGCCGAGAGGGATGTGGAGGGCGAGAGAGAGCGACTTCTCTCGGGCCACAGCCTTACAGCTGTGGA  
 +  
 FFFFFFFFFFFFFFFFFFFFFFFFFF:FFFFFFFFFFFFFFFF:FFFFFFFFFFFFFFFFFFFFFFFFFFFFFFFF  
 FFFFFFFFFF:FFFFFFFFFFFFFFFF:FFFFFFFFFFFFFFFFFFFFFFFFFFFFFFFFFFFFFFFFFFFF  
 @A00155:342:HHGFNDSXY:1:1363:26955:18176 1:N:0:GAACCTAG+TCCGCATA  
 AGAGAGCGACTTCTCTCGGGCCACAGCCTTACAGCTGTGGAGCACGGTATCCTCTGCCGAAACAGAG  
 GTTGGACAAGACCGGAGGGGTCTCCTAGTTCCAAAGGAGATGTACTCCGGGCTTGTTACACGACCTACC  
 +  
 FFFFFFFFFFFFFFFFFFFFFFFFFF:FFFFFFFFFFFFFFFF:FFFFFFFFFFFFFFFFFFFFFFFFFFFFFFFF  
 FFFFFFFFFF:FFFFFFFFFFFFFFFF:FFFFFFFFFFFFFFFFFFFFFFFFFFFFFFFFFFFFFFFFFFFF  
 @A00155:342:HHGFNDSXY:1:1363:24560:24643 1:N:0:GAACCTAG+TCCGCATA  
 CTCCTCTGGCCTATGGTCATCTCAATGCCGAGAGGGATGTGGAGGGCGAGAGAGAGCGACTTCTCTCG  
 GGCCACAGCCTTACAGCTGTGGAGCACGGTATCCTCTGCCGAAACAGAGGTTGGACAAGACCGGAGG  
 +  
 FFFFFFFFFFFFFFFFFFFFFFFFFF:FFFFFFFFFFFFFFFF:FFFFFFFFFFFFFFFFFFFFFFFFFFFFFFFF  
 FFFFFFFFFF:FFFFFFFFFFFFFFFF:FFFFFFFFFFFFFFFFFFFFFFFFFFFFFFFFFFFFFFFFFFFF  
 @A00155:342:HHGFNDSXY:1:1363:6144:29262 1:N:0:GAACCTAG+TCCGCATA  
 AGAGAGAGCGACTTCTCTCGGGCCACAGCCTTACAGCTGTGGAGCACGGTATCCTCTGCCGAAACAG  
 AGGTTGGACAAGACCGGAGGGGTCTCCTAGTTCCAAAGGAGATGTACTCCGGGCTTGTTACGACCTA  
 +  
 FFFFFFFFFFFFFFFFFFFFFFFFFF,FFFFFFFFFFFF:FFFFFFFFFFFFFFFFFFFFFFFFFFFFFFFF  
 FFFFFFFFFF:FFFFFFFFFFFF:FFFFFFFFFFFFFFFFFFFFFFFFFFFFFFFFFFFFFFFFFFFF  
 @A00155:342:HHGFNDSXY:1:1363:2880:33661 1:N:0:GAACCTAG+TCCGCATA  
 GAGAGGGATGTAGAGGGCGAGAGAGAGCGACTTCTCTCGGGCCACAGCCTTACAGCTGTGGAGCACG  
 GTATCCTCTGCCGAAACAGAGGTTGGACAAGACCGGAGGGGTCTCCTAGTTCCAAAGGAGATGTACTC  
 +  
 FFFFFFFFFFFFFFFFFFFFFFFFFF:FF:FFFFFFFFFFFFFFFFFFFFFFFFFFFFFFFFFFFFFFFF  
 FFFFFFFFFF:FFFFFFFFFFFFFFFF:FFFFFFFFFFFFFFFFFFFFFFFFFFFFFFFFFFFFFFFFFFFF  
 @A00155:342:HHGFNDSXY:1:1364:25699:14622 1:N:0:GAACCTAG+TCCGCATA  
 GAGAGGGATGTGGAGGGCGAGAGAGAGCGACTTCTCTCGGGCCACAGCCTTACAGCTGTGGAGCACG  
 GTATCCTCTGCCGAAACAGAGGTTGGACAAGACCGGAGGGGTCTCCTAGTTCCAAAGGAGATGTACTC  
 +  
 FFFFFFFFFFFFFFFFFFFFFFFFFF:FFFFFFFFFFFFFFFF:FFFFFFFFFFFFFFFFFFFFFFFFFFFFFFFF  
 FFFFFFFFFF:FFFFFFFFFFFFFFFF:FFFFFFFFFFFFFFFFFFFFFFFFFFFFFFFFFFFFFFFFFFFF  
 @A00155:342:HHGFNDSXY:1:1364:28782:18239 1:N:0:GAACCTAG+TCCGCATA  
 GTCATCTCAATGCCGAGAGGGATGTGGAGGGCGAGAGAGAGCGACTTCTCTCGGGCCACAGCCTTAC  
 AGCTGTGGAGCACGGTATCCTCTGCCGAAACAGAGGTTGGACAAGACCGGAGGGGTCTCCTGGTTCCA  
 +  
 FFFFFFFFFFFFFFFFFFFFFFFFFF:FFFFFFFFFFFFFFFF:FFFFFFFFFFFFFFFFFFFFFFFFFFFFFFFF  
 FFFFFFFFFF:FFFFFFFFFFFFFFFF:FFFFFFFFFFFFFFFFFFFFFFFFFFFFFFFFFFFFFFFFFFFF  
 @A00155:342:HHGFNDSXY:1:1364:30355:19617 1:N:0:GAACCTAG+TCCGCATA  
 TCCTCTGCCGAAACAGAGGTTGGACAAGACCGGAGGGGTCTCCTAGTTCCAAAGGAGATGTACTCCGG  
 GCTTGTTACAGACCTACCGTGTAAAGTCGTAGTCTAGTAGGCTACCTGACGAGTCCTTTTAGGACGAA  
 +  
 FFFFFFFFFFFFFFFFFFFFFFFFFF:FFFFFFFFFFFFFFFF:FFFFFFFFFFFFFFFFFFFFFFFFFFFFFFFF  
 FFFFFFFFFF:FFFFFFFFFFFFFFFF:FFFFFFFFFFFFFFFFFFFFFFFFFFFFFFFFFFFFFFFFFFFF

[illegible]



[illegible]

@A00155:342:HHGFNDSXY:1:1369:4128:8390 1:N:0:GAACCTAG+TCCGCATA  
GAGCGACTTCTCTCGGGCCCCACAGCCTTACAGCTGTGGAGCACGGTATCCTCTGCCGAAACAGAGGTTG  
GGACAAGACCGGAGGGGTCTCCTAGTTCCAAAGGAGATGTACTCCGGGCTTGTTACGACCTACCGTG  
+  
FFFFFFFFFFFFFFFFFFFFFFFFFFFFFFFFFFFFFFFFFFFFFFFFFFFFFFFFFFFFFFFFFFFFFFFFFFFFF,FFFFFFFFFFFFFFFFFFFFFFFFFFFFFFF  
FFFFFFFFFFFFFFFFFFFFFFFFFFFFFFFFFFFFFFFFFFFFFFFFFFFFFFFFFFFFFFFFFFFFFFFFFFFFFFF:FFF:FFFFFFF  
@A00155:342:HHGFNDSXY:1:1369:25536:8578 1:N:0:GAACCTAG+TCCGCATA  
AGCGACTTCTCTCGGGCCCCACAGCCTTACAGCTGTGGAGCACGGTATCCTCTGCCGAAACAGAGGTTG  
GACAAGACCGGAGGGGTCTCCTAGTTCCAAAGGAGATGTACTCCGGGCTTGTTACGACCTACCGTGT  
+  
FFFFFFFFFFFFFFFFFFFFFFFFFFFFFFFFFFFFFFFFFFFFFFFFFFFFFFFFFFFFFFFFFFFFFFFFFFFFF:FFFFFF:FFFFFFFFFFFFFFFFFFFFFFFFFFFFFFF  
FFFFFFFFFFFFFFFFFFFFFFFFFFFFFFFFFFFFFFFFFFFFFFFFFFFFFFFFFFFFFFFFFFFFFFFFFFFFFFF:FFFFFFFFFF:FFFFFFFFFFFFFFF:FFFFFFFFFFFFFFFFFFFFFFFFFFFFFFF  
@A00155:342:HHGFNDSXY:1:1369:14199:17127 1:N:0:GAACCTAG+TCCGCATA  
GAGCGACTTCTCTCGGGCCCCACAGCCTTACAGCTGTGGAGCACGGTATCCTCTGCCGAAACAGAGGTTG  
GGACAAGACCGGAGGGGTCTCCTAGTTCCAAAGGAGATGTACTCCGGGCTTGTTACGACCTACCGTG  
+  
FFFF,FFFFFFFFFFFFFFFFFFFFFFFFFFFFFFFFFFFFFFFFFFFFFFFFFFFFFFFFFFFFFFFFFFFFFFFFF:FFFFFFFFFFFFFFFFFFFFFFF:FFFFF,FFFFF:FFFFF:F  
FFFFFFFFFF,F:FF:,FF:FFFFFFFF:FFFF:::F:,F,FFFF:FF,FFFFFFFFFF,FF,FFFF,F  
@A00155:342:HHGFNDSXY:1:1369:24198:19601 1:N:0:GAACCTAG+TCCGCATA  
TGTCCTTAAGGACTCACCTCTGGCCTATGGTCATCTCAATGCCGAGAGGGATGTGGAGGGCGAGAG  
AGAGCGACTTCTCTCGGGCCCCACAGCCTTACAGCTGTGGAGCACGGTATCCTCTGCCGAAACAGAGGT  
+  
FFFFFFFFFFFFFFFFFFFFFFFFFFFFFFFFFFFFFFFFFFFFFFFFFFFFFFFFFFFFFFFFFFFFFFFFFFFFF:FFFFFFFFFFFFFFFFFFFFFFF  
FFFFFFFFFFFFFFFFFFFFFFFFFFFFFFFFFFFFFFFFFFFFFFFFFFFFFFFFFFFFFFFFFFFFFFFFFFFFFFF:FFFFFFFFFFFFFFFFFFFFFFFFFFFFFFFFFFFFFFFFFFFFFFF  
@A00155:342:HHGFNDSXY:1:1369:26992:22467 1:N:0:GAACCTAG+TCCGCATA  
CTCTCGGGCCCCACAGCCTTACAGCTGTGGAGCACGATATCCTCTGCCGAAACAGAGGTTGGACAAGAC  
CGGAGGGGTCTCCTAGTTCCAAAGGAGATGTACTCCGGGCTTGTTACGACCTACCGTGTAAGTCGTA  
+  
FFFFFFFFFFFFFFFFFFFFFFFFFFFFFFFFFFFFFFFFFFFFFFFFFFFFFFFFFFFFFFFFFFFFFFFFFFFFF:FFFFFFFFFFFFFFFFFFFFFFFFFFFFFFFFFFFFFFF:FF  
FFFFFFFFFFFFFFFFFF,FFFFFFFFF:FFFFFFFFFFFFFFFFFFFFFFFFFFFFFFFFFFFFFFFFFFFFF:FFFFFFFFFFFFFFFFFFFFFFFFFFFFFFFFFFFFFFF  
@A00155:342:HHGFNDSXY:1:1370:14913:6872 1:N:0:GAACCTAG+TCCGCATA  
GCGACTTCTCTCGGGCCCCACAGCCTTACAGCTGTGGAGCACGGTATCCTCTGCCGAAACAGAGGTTGG  
ACAAGACCGGAGGGGTCTCCTAGTTCCAAAGGAGATGTACTCCGGGCTTGTTACGACCTACCGTGTA  
+  
FFFFFFFFF:FFFFFFFFFFFFFFFFFFFFFFFFFFFFFFFFFFFFFFFFFFFFFFFFFFFFFFFFFFFFFFFFFFFFF:FFF:FFFFFFF  
FFFFF:FFFF:FFFFFFFFFFFFFFFFFFFFFFFFFFFFFFFFFFFFFFFFFFFFFFFFFFFFFFFFFFFFFFFFFFFFF,FFF  
@A00155:342:HHGFNDSXY:1:1370:24180:7451 1:N:0:GAACCTAG+TCCGCATA  
TGTGGAGGGCGAGAGAGAGCGACTTCTCTCGGGCCCCACAGCCTTACAGCTGTGGAGCACGGTATCCTC  
TGCCGAAACAGAGGTTGGACAAGACCGGAGGGGTCTCCTAGTTCCATAGGAGATGTACTCCGGG  
+  
FFFFFFFFFFFFFFFFFFFFFFFFFFFFFFFFFFFFFFFFFFFFFFFFFFFFFFFFFFFFFFFFFFFFFFFFFFFFF:FFFFFFFFFFFFFFFFFFFFFFFFFFFFFFFFFFFFFFF  
FFFFFFFFFFFFFFFFFFFFFFFFFFFFFFFFFFFFFFFFFFFFFFFFFFFFFFFFFFFFFFFFFFFFFFFFFFFFFFF  
@A00155:342:HHGFNDSXY:1:1370:13476:11115 1:N:0:GAACCTAG+TCCGCATA  
CCTTACAGCTGTGGAGCACGGTATCCTCTGCCGAAACAGAGGTTGGACAAGACCGGAGGGGTCTCCTA  
GTTCCAAAGGAGATGTACTCCGGGCTTGTTACGACCTACCGTGTAAGTCGTAGTCTAGTAGGCTACC  
+  
FF:FFFFFFFFFFFFFFFFFFFFFFFFFFFFFFFFFFFFFFFFFFFFFFFFFFFFFFFFFFFFFFFFFFFFFFFFFFFFF  
FFFFFFFFFFFFFFFFFFFFFFFFFFFFFFFFFFFFFFFFFFFFFFFFFFFFFFFFFFFFFFFFFFFFFFFFFFFFFFF,FF,FFFFFFFFFFFFFFFFFFFFFFFFFFFFFFFFFFFFFFF,FFFFFFFFF  
@A00155:342:HHGFNDSXY:1:1370:18828:20635 1:N:0:GAACCTAG+TCCGCATA  
ATCTCAATGCCGAGAGGGATGTAGAGGGCGAGAGAGAGCGACTTCTCTCGGGCCCCACAGCCTTACAGC  
TGTGGAGCACGGTATCCTCTGCCGAAACAGAGGTTGGACAAGACCGGAGGGGTCTCCTAGTTCCAAAG  
+  
FFFFFFFFFFFFFFFFFFFFFFFFFFFFFFFFFFFFFFFFFFFFFFFFFFFFFFFFFFFFFFFFFFFFFFFFFFFFF  
FFFFFFFFFFFFFFFFFFFFFFFFFFFFFFFFFFFFFFFFFFFFFFFFFFFFFFFFFFFFFFFFFFFFFFFFFFFFFFF:FFFFFFFFFFFF,:FFFFFFFFFFFFFFFFFFFFFFFFFFFFFFFFF

[illegible]

@A00155:342:HHGFNDSXY:1:1373:12219:12070 1:N:0:GAACCTAG+TCCGCATA  
GAGAGAGCGACTTCTCTCGGGCCACAGCCTTACAGCTGTGGAGCACGGTATCCTCTGCCGAAACAGA  
GGTTGGACAAGACCGGAGGGGTCTCCTAGTTCCAAAGGAGATGTACTCCGGGCTTGTTACG

+

FFFFFFFFFFFFFFFFFFFFFFFFFFFFFFFFFFFFFFFFFFFFFFFFFFFFFFFFFFFFFFFFFFFFFFFF  
FFFFFFFFFFFFFFFFFFFFFFFFFFFFFFFFFFFFFFFFFFFFFFFFFFFFFFFFFFFFFFFFFFFFFFFF

@A00155:342:HHGFNDSXY:1:1373:12219:25723 1:N:0:GAACCTAG+TCCGCATA  
CTCTGGCCTATGGTCATCTCAATGCCGAGAGGGATGTGAAGGGCGAGAGAGAGCGACTTCTCTCGGGC  
CCACAGCCTTACAGCTGTGGAGCACGGTATCCTCTGCCGAAACAGAGGTTGGACAAGACCGGAGGGGT

+

FFFFFFFFFFFFFFFFFFFFFFFF:FFFFFF,FFFFFFFFFFFFFFFFFFFFFFFFFFFFFFFFFFFFFFFF  
FFFFFFFFFFFFFFFFFFFFFFFF:FFFFFFFFFFFFFFFFFFFFFFFFFFFFFFFFFFFFFFFFFFFFFFFF

@A00155:342:HHGFNDSXY:1:1373:9055:27759 1:N:0:GAACCTAG+TCCGCATA  
AGCGACTTCTCTCGGGCCACAGCCTTACAGCTGTGGAGCACGGTATCCTCTGCCGAAACAGAGGTTG  
GACAAGACCGGAGGGGTCTCCTGGTTCCAAAGGAGATGTACTCCGGGCTTGTTACGACCTACCGTGT

+

FFFFF,FFFFFFFFFFFFFFFFFFFFFFFFFFFFFFFFFFFFFFFFFFFFFFFFFFFFFFFF,FFFFFFF  
FFFFFFFFFFFFFFFFFFFFFFFFFFFFFFFFFFFFFFFFFFFFFFFFFFFFFFFFFFFFFFFFFFFFFFFF

@A00155:342:HHGFNDSXY:1:1373:9435:28103 1:N:0:GAACCTAG+TCCGCATA  
AGCGACTTCTCTCGGGCCACAGCCTTACAGCTGTGGAGCACGGTATCCTCTGCCGAAACAGAGGTTG  
GACAAGACCGGAGGGGTCTCCTGGTTCCAAAGGAGATGTACTCCGGGCTTGTTACGACCTACCGTGT

+

FFFFFFFFFFFFFFFFFFFFFFFFFFFFFFFFFFFFFFFFFFFFFFFFFFFFFFFFFFFFFFFF:FFFFF  
FFFFFFFFFFFFFFFFFFFFFFFFFFFFFFFFFFFFFFFFFFFFFFFFFFFFFFFFFFFFFFFFFFFFFFFF:FF

@A00155:342:HHGFNDSXY:1:1373:28004:31861 1:N:0:GAACCTAG+TCCGCATA  
CTCAATGCCGAGAGGGATGTGGAGGGCGAGAGAGAGCGACTTCTCTCGGGCCACAGCCTTACAGCTG  
TGGAGCACGGTATCCTCTGCCGAAACAGAGGTTGGACAAGACCGGAGGGGTCTCCTAGTTCCAAAGGA

+

FFFFFFFFFFFFFFFFFFFFFFFF:FFFFFFFFFFFFFFFFFFFFFFFFFFFFFFFFFFFFFFFFFFFFFFFF  
FFFFFFFFFFFFFFFFFFFFFFFFFFFFFFFFFFFFFFFFFFFFFFFFFFFFFFFFFFFFFFFFFFFFFFFF

@A00155:342:HHGFNDSXY:1:1374:27308:15280 1:N:0:GAACCTAG+TCCGCATA  
CTCAATGCCGAGAGGGATGTAGAGGGCGAGAGAGAGCGACTTCTCTCGGGCCACAGCCTTACAGCTG  
TGGAGCACGGTATCCTCTGCCGAAACAGAGGTTGGACAAGACCGGAGGGGTCTCCTAGTTCCAAAGGA

+

FFFFFFFFFFFFFFFFFFFFFFFFFFFFFFFFFFFFFFFFFFFFFFFFFFFFFFFFFFFFFFFF:FFFFF  
FFFFFFFFFFFFFFFF:FFFFFFFFFFFFFFFFFFFFFFFFFFFFFFFFFFFFFFFFFFFFFFFFFFFFFFFF

@A00155:342:HHGFNDSXY:1:1374:5032:19476 1:N:0:GAACCTAG+TCCGCATA  
CAATGCCGAGAGGGATGTGGAGGGCGAGAGAGAGCGACTTCTCTCGGGCCACAGCCTTACAGCTGTG  
GAGCACGGTATCCTCTGCCGAAACAGAGGTTGGACAAGACCGGAGGGGTCTCCTAGTTCCAAAGGAGA

+

FFFFFFFFFFFFFFFF:FFFFFF,,FFFFFFFFFFFFFFFFFFFFFFFFFFFFFFFFFFFFFFFF:FFFFFFF  
FFFFFFFFF:FFFFFFFFFFFFFFFFFFFFFFFFFFFFFFFFFFFFFFFFFFFFFFFFFFFFFFFFFFFFFFF

@A00155:342:HHGFNDSXY:1:1374:20193:21966 1:N:0:GAACCTAG+TCCGCATA  
GAGCGACTTCTCTCGGGCCACAGCCTTACAACTGTGGAGCACGGTATCCTCTGCCGAAACAGAGGTT  
GGACAAGACCGGAGGGGTCTCCTAGTTCCAAAGGAGATGTACTCCGGGCTTGTTACGACCTACCGTG

+

FFFFFFFFFFFFFFFFFFFFFFFFFFFFFFFFFFFFFFFFFFFFFFFFFFFFFFFFFFFFFFFFFFFFFFFF  
FFFFFFFFFFFFFFFFFFFFFFFFFFFFFFFFFFFFFFFFFFFFFFFFFFFFFFFFFFFFFFFFFFFFFFFF

@A00155:342:HHGFNDSXY:1:1375:29559:10034 1:N:0:GAACCTAG+TCCGCATA  
CGAGAGGGATGTGGAGGGCGAGAGAGAGCGACTTCTCTCGGGCCACAGCCTTACAGCTGTGGAGCAC  
GGTATCCTCTGCCGAAACAGAGGTTGGACAAGACCGGAGGGGTCTCCTAGTTCCAAAGGAGATGTA

+

:FF:FF,:FFF,:FFFFFFFF:FFFF:FFFFFFFFFFFF:F:FF:FF::F,F,FFFFFFFF:FF:FFF  
:FFF,FFFFFF,FFFFFFFF:F:FFFFF:FFFFFFFFFF:FF:FF::F,:FFFF,FF:,::F

@A00155:342:HHGFNDSXY:1:1375:6108:16548 1:N:0:GAACCTAG+TCCGCATA  
GATCAGCTGTGTCCACTTAAGGACTCACCTCTGGCCTATGGTCATCTCAATGCCGAGAGGGATGTGAA  
GGGCGAGAGAGAGCGACTTCTCTCGGGCCCACAGCCTTACAGCTGTGGAGCACGGTATCCTCTGCCGA  
+  
FFFFFFFFFFFFFFFFFFFFFFF,FFFFFFFFFFFFFFFFFFFFFFF:FFFFFFFFFFFFFFFFFFFFFFFFFFFFF  
FFFFFFFFFFFFFFFFFFFFFFFFFFFFFFFFFFFFFFFFFFFFFFFFFFFFFFFFFFFFFFFFFFFFFFFFFFFFF  
@A00155:342:HHGFNDSXY:1:1375:20916:26193 1:N:0:GAACCTAG+TCCGCATA  
ACCTCTGTTTCGGCAGAGGATACCGTGCTCCACAGCTGTAAGGCTGTGGCCCCGAGAGAAGTCGCTCT  
CTCTCGCCCTCCACATCCCTCTCGGCATTGAGATGACCATAGGCCAGAGGAGAGTCCTTAAGTGGACA  
+  
FFFFFFFFFFFFFFFFFFFFFFFFFFFFFFFFFFFFFFFFFFFFFFFFFFFFFFFFFFFFFFFFFFFFFFFFFFFFF  
FFFFFFFFFFFFFFFFFFFFFFFFFFFFFFFFFFFFFFFFFFFFFFFFFFFFFFFFFFFFFFFFFFFFFFFFFFFFF  
@A00155:342:HHGFNDSXY:1:1375:21233:26490 1:N:0:GAACCTAG+TCCGCATA  
ACCTCTGTTTCGGCAGAGGATACCGTGCTCCACAGCTGTAAGGCTGTGGCCCCGAGAGAAGTCGCTCT  
CTCTCGCCCTCCACATCCCTCTCGGCATTGAGATGACCATAGGCCAGAGGAGAGTCCTTAAGTGGACA  
+  
FFFFFFFFFFFFFFFFFFFFFFFFFFFFFFFFFFFFFFFFFFFFFFFFFFFFFFFFFFFFFFFFFFFFFFFFFFFFF  
FFFFFFFFFFFFFFFFFFFFFFFFFFFFFFFFFFFFFFFFFFFFFFFFFFFFFFFFFFFFFFFFFFFFFFFFFFFFF  
@A00155:342:HHGFNDSXY:1:1375:1036:36980 1:N:0:GAACCTAG+TCCGCATA  
TTAAGGACTCACCTCTGGCCTATGGTCATCTCAATGCCGAGAGGGATGTAGAGGGCGAGAGAGAGCGA  
CTTCTCTCGGGCCCACAGCCTTACAGCTGTGGAGCACGGTATCCTCTGCCGAAACAGAGGTTGGACAA  
+  
F,:FFFFFFFFFFFFFFFFFFF::,:FFF:FFFF,FFFFFF:F:FFFF,F,,FFFFFFFFFFFFFFFFFFFFF  
F::FFF:FFFFFFFFFFFFFFFFF:FFFFFF:F,FFFF:FFFF,FFFFFFFFFFFFF:FFFFFF,FFF:FFF  
@A00155:342:HHGFNDSXY:1:1376:28420:5963 1:N:0:GAACCTAG+TCCGCATA  
ACTTCTCTCGGGCCCACAGCCTTACAGCTGTGGAGCACGGTATCCTCTGCCGAAACAGAGGTTGGACA  
AGACCGGAGGGGTCTCCTAGTTCAAAGGAGATGTACTCCGGGCTTGTTACGACCTACCGTGTAAGT  
+  
FFFFFFFFFFFFFFFFFFFFFFFFFFFFFFFFFFFFFFFFFFFFFFFFFFFFFFFFFFFFFFFFFFFFFFFFFFFFF  
FFFFFFFFFFFFFFFFFFFFFFFFFFFFFFFFFFFFFFFFFFFFFFFFFFFFFFFFFFFFFFFFFFFFFFFFFFFFF,FFF  
@A00155:342:HHGFNDSXY:1:1376:8603:6402 1:N:0:GAACCTAG+TCCGCATA  
CCCACAGCCTTACAGCTGTGGAGCACGGTATCCTCTGCCGAAACAGAGGTTGGACAAGACCGGAGGGG  
TCTCTGGTTCCAAAGGAGATGTACTCCGGGCTTGTTACGACCTACCGTGTAAGTCGTAGTCTAGTA  
+  
FFFFFFFFFFF:FFFFFFFFFFFFFFFFFFFFFFFFFFFFFFFFFFFFFFFFFFFFFFFFFFFFFFFFFFFFF:F:FFFFFFFFFF  
FFFFFFFFFFFFFFFFFFFFFFFFFFFFFFFFFFFFFFFFFFFFFFFFFFFFFFFFFFFFFFFFFFFFFFFFFFFFF  
@A00155:342:HHGFNDSXY:1:1376:8829:6574 1:N:0:GAACCTAG+TCCGCATA  
CCCACAGCCTTACAGCTGTGGAGCACGGTATCCTCTGCCGAAACAGAGGTTGGACAAGACCGGAGGGG  
TCTCTGGTTCCAAAGGAGATGTACTCCGGGCTTGTTACGACCTACCGTGTAAGTCGTAGTCTAGTA  
+  
FFFFFFFFFFFFFFFFFFFFFFFFFFFFFFFFFFFFFFFFFFFFFFFFFFFFFFFFFFFFFFFFFFFFFFFFFFFFF  
FFFFFFFFFFFFFFFFFFFFFFFFFFFFFFFFFFFFFFFFFFFFFFFFFFFFFFFFFFFFFFFFFFFFFFFFFFFFF  
@A00155:342:HHGFNDSXY:1:1376:17020:19570 1:N:0:GAACCTAG+TCCGCATA  
AAGGACTCTCCTCTGGCCTATGGTCATCTCAATGCCGAGAGGGATGTGGAGGGCGAGAGAGAGCGACT  
TCTCTCGGGCCCACAGCCTTACAGCTGTGGAGCACGGTATCCTCTGCCGAAACAGAGGTTGGAC  
+  
FFFFFFFFFFFFFFFFFFFFFFFFFFFFFFFFFFFFFFFFFFFFFFFFFFFFFFFFFFFFFFFFFFFFFFFFFFFFF  
FFFFFFFFFFFFFFFFFFFFFFFFFFFFFFFFFFFFFFFFFFFFFFFFFFFFFFFFFFFFFFFFFFFFFFFFFFFFF  
@A00155:342:HHGFNDSXY:1:1376:26666:34178 1:N:0:GAACCTAG+TCCGCATA  
GACTTCTCTCGGGCCCACAGCCTTACAGCTGTGGAGCACGGTATCCTCTGCCGAAACAGAGGTTGGAC  
AAGACCGGAGGGGTCTCCTGGTTCCAAAGGAGATGTACTCCGGGCTTGTTACGACCTACCGTGTAAG  
+  
FFFFFFFFFFFFFFFFFFFFFFFFFFFFFFFFFFFFFFFFFFFFFFFFFFFFFFFFFFFFFFFFFFFFFFFFFFFFF  
FFFFFFFFFFFFFFFFFFFFFFFFFFFFFFFFFFFFFFFFFFFFFFFFFFFFFFFFFFFFFFFFFFFFFFFFFFFFF  
@A00155:342:HHGFNDSXY:1:1376:26666:34178 1:N:0:GAACCTAG+TCCGCATA  
GACTTCTCTCGGGCCCACAGCCTTACAGCTGTGGAGCACGGTATCCTCTGCCGAAACAGAGGTTGGAC  
AAGACCGGAGGGGTCTCCTGGTTCCAAAGGAGATGTACTCCGGGCTTGTTACGACCTACCGTGTAAG





@A00155:342:HHGFNDSXY:1:1401:12933:26616 1:N:0:GAACCTAG+TCCGCATA  
TTAAGGACTCTCCTCTGGCCTATGGTCATCTCAATGCCGAGAGGGATGTGGAGGGCGAGAGAGAGCGA  
CTTCTCTCGGGCCCACAGCCTTACAGCTGTGGAGCACGGTATCCTCTGCCGAAACAGAGGTTGGACAA  
+  
FFFFFFFFFFFFFFFFFFFFFFFF:FFFFFFFFFFFFFFFF:FFFFFFFF:FFFFFFFFFFFFFFFF:FFFFFFF  
FFFFFFFFFFFFFFFFFFFFFFFFFFFFFFFFFFFFFFFFFFFFFFFFFFFFFFFFFFFFFFFFFFFFFFFFFFFFF  
@A00155:342:HHGFNDSXY:1:1402:25464:5791 1:N:0:GAACCTAG+TCCGCATA  
GGGCGAGAGAGAGCGACTTCTCTCGGGCCCACAGCCTTACAGCTGTGGAGCACGGTATCCTCTGCCGA  
AACAGAGGTTGGACAAGACCGGAGGGGTCTCCTAGTTCCAAAGGAGATGTACTCCGGGCTTGTTCACG  
+  
FFF:FFFFFFFFFFFFFFFFFFFFFFFFFFFFFFFFFFFFFFFFFFFFFFFFFFFFFFFFFFFFFFFFFFFFFFFFF  
FFFFFFFFFFFFFFFFFFFFFFFFFFFFFFFFFFFFFFFF:FFFFFFFFFFFFFFFF:FFFFFFFFFFFFFFFFF  
@A00155:342:HHGFNDSXY:1:1402:22110:30859 1:N:0:GAACCTAG+TCCGCATA  
TCCTCTGCCGAAACAGAGGTTGGACAAGACCGGAGGGGTCTCCTAGTTCCAAAGGAGATGTACTCCGG  
GCTTGTTCACGACCTACCGTGTAAAGTCGTAGTCTAGTAGGCTACCTGACGAGTCCTTTTTAGGACGAA  
+  
FFFFFFFFFFFFFFFFFFFFFFFFFFFFFFFFFFFFFFFFFFFFFFFFFFFFFFFFFFFFFFFFFFFFFFFFFFFFF  
FF:FFFFFFFFFFFFFFFFFFFFFFFFFFFFFFFFFFFFFFFFFFFFFFFFFFFFFFFFFFFFFFFFFFFFFFFFF,FFFFFFFFF  
@A00155:342:HHGFNDSXY:1:1403:21630:6261 1:N:0:GAACCTAG+TCCGCATA  
TTACAGCTGTGGAGCACGGTATCCTCTGCCGAAACAGAGGTTGGACAAGACCGGAGGGGTCTCCTAGT  
TCCAAAGGAGATGTACTCCGGGCTTGTTCACGACCTACCGTGTAAAGTCGTAGTCTAGTAGGCTACCTG  
+  
FFFFFFFFFFFFFFFFFFFFFFFFFFFFFFFF:FFFFFFFFFFFFFFFFFFFFFFFF:FFFFFFFFFFFFFFFFFFFFF  
FFFFFFFFFFFF:FFFFFFFFFFFF:FFFFFFFFFFFFFFFFFFFFFFFF:FFFFFFFFFFFFFFFFFFFFFFFF:F  
@A00155:342:HHGFNDSXY:1:1403:8829:8359 1:N:0:GAACCTAG+TCCGCATA  
GAGAGAGCGACTTCTCTCGGGCCCACAGCCTTACAGCTGTGGAGCACGGTATCCTCTGCCGAAACAGA  
GGTTGGACAAGACCGGAGGGGTCTCCTGTTCCAAAGGAGATGTACTCCGGGCTTGTTCACGACCTAC  
+  
FFFFFFFFFFFFFFFFFFFFFFFFFFFFFFFFFFFFFFFF:FFFFFFFFFFFF:F:FFFFFFFFFFFFFFFFFFFFF  
FFFFFFFFFFFFFFFFFFFFFFFFFFFFFFFFFFFFFFFF:FFFFFFFFFFFFFFFFFFFFFFFFFFFFFFFF:FFFFF  
@A00155:342:HHGFNDSXY:1:1403:3577:8844 1:N:0:GAACCTAG+TCCGCATA  
AGAGAGAGCGACTTCTCTCGGGCCCACAGCCTTACAGCTGTGGAGCACGGTATCCTCTGCCGAAACAG  
AGGTTGGACAAGACCGGAGGGGTCTCCTAGTTCCAAAGGAGATGTACTCCGGGCTTGTTCACGACCTA  
+  
FFFFFFFFFFFFFFFFFFFFFFFFFFFFFFFFFFFFFFFF:FFFFFFF:FFFFFFFFFFFFFFFFFFFF:FFFFFFFFFFFFF  
FFFFF:FFFFFFFFFFFFFFFFFFFFFFFFFFFFFFFFFFFFFFFFFFFFFFFFFFFFFFFFFFFFFFFFFFFFF  
@A00155:342:HHGFNDSXY:1:1403:26982:15060 1:N:0:GAACCTAG+TCCGCATA  
CTTCTCTCGGGCCCACAGCCTTACAGCTGTGGAGCACGGTATCCTCTGCCGAAACAGAGGTTGGACAA  
GACCGGAGGGGTCTCCTAGTTCCAAAGGAGATGTACTCCGGGCTTGTTCACGACCTACCGTGTAAAGTC  
+  
FFFFFFFFFFFFFFFFFFFFFFFFFFFFFFFF:FFFFF:FFFFF:FFFFFFFFFFFFFFFFFFFFFFFFFFFFFFFFF  
FFFF:, ,FFFFFFFFFFFFFFFFFFFFFFFFFFFFFFFF:FFFFFFFFFFFFFFFFFFFFFFFFFFFFFFFFF  
@A00155:342:HHGFNDSXY:1:1403:27597:15092 1:N:0:GAACCTAG+TCCGCATA  
GCTGTGTCCACTTAAGGACTCACCTCTGGCCTATGGTCATCTCAATGCCGAGAGGGATGTAGAGGGCG  
AGAGAGAGCGACTTCTCTCGGGCCCACAGCCTTACAGCTGTGGAGCACGGTATCCTCTGCCGAAACAG  
+  
FFFFFFFFFFFFFFFFFFFFFFFFFFFFFFFFFFFFFFFFFFFFFFFFFFFFFFFFFFFFFFFFFFFFFFFFFFFFF  
FFFFFFFFFFFFFFFFFFFFFFFFFFFFFFFFFFFFFFFF:FFFFFFFFFFFFFFFFFFFFFFFF:FFFFFFFFFFFFF  
@A00155:342:HHGFNDSXY:1:1403:27272:15154 1:N:0:GAACCTAG+TCCGCATA  
CTTCTCTCGGGCCCACAGCCTTACAGCTGTGGAGCACGGTATCCTCTGCCGAAACAGAGGTTGGACAA  
GACCGGAGGGGTCTCCTAGTTCCAAAGGAGATGTACTCCGGGCTTGTTCACGACCTACCGTGTAAAGTC  
+  
FFFFFFFFF:FFFFFFFFFFFFFFFF:FFFFFFF,FFFFFFFFFFFF:FFFFFFFFFFFF:FFFF:FFFFFFF  
FFFFFFFFF:FFFFFFFFFFFFFFFFFFFFFFFFFFFFFFFF:FFF,FFFFFFFFFFFFFFFFFFFFFFFF:FFFFFFF:FFF

@A00155:342:HHGFNDSXY:1:1403:18358:35227 1:N:0:GAACCTAG+TCCGCATA  
CTCCACAGCTGTAAGGCTGTGGGCCCGAGAGAAGTCGCTCTCTCTCGCCCTCCACATCCCTCTCGGCA  
TTGAGATGACCATAGGCCAGAGGTGAGTCCTTAAGTGACACAGCTGATCTAAGGCGGTGTGGCGGGG  
+  
FFFFFFFFFFFFFFFFFFFFFFFFFFFFFFFFFFFFFFFFFFFFFFFFFFFFFFFFFFFFFFFFFFFFFFFFFFFFF:  
FFF:FFFFFFFFFFFFFFFFFFFFFFFFFFFFFFFFFFFFFFFFFFFFFFFFFFFFFFFFFFFFFFFFFFFFFFFFF:  
@A00155:342:HHGFNDSXY:1:1403:18204:35274 1:N:0:GAACCTAG+TCCGCATA  
CTCCACAGCTGTAAGGCTGTGGGCCCGAGAGAAGTCGCTCTCTCTCGCCCTCCACATCCCTCTCGGCA  
TTGAGATGACCATAGGCCAGAGGTGAGTCCTTAAGTGACACAGCTGATCTAAGGCGGTGTGGCGGGG  
+  
FFFFFFFFFFFFFFFFFFFFFFFFFFFFFFFFFFFFFFFFFFFFFFFFFFFFFFFFFFFFFFFFFFFFFFFFFFFFF:  
FFFFFFFFFFFFFFFFFFFFFFFFFFFFFFFFFFFFFFFFFFFFFFFFFFFFFFFFFFFFFFFFFFFFFFFFFFFFF:  
@A00155:342:HHGFNDSXY:1:1404:6479:1501 1:N:0:GAACCTAG+TCCGCATA  
ATCTCAATGCCGAGAGGGATGTGGAGGGCGAGAGAGAGCGACTTCTCTCGGGCCCACAGCCTTACAGC  
TGTGGAGCACGGTATCCTCTGCCGAAACAGAGGTTGGACAAGACCGGAGGGGTCTCCTAGTTCCAAAG  
+  
FFFFFFFFFFFFFFFFFFFFFFFFFFFFFFFFFFFFFFFFFFFFFFFFFFFFFFFFFFFFFFFFFFFFFFFFFFFFF:  
FFFFFFFFFFFFFFFFFFFFFFFFFFFFFFFFFFFFFFFFFFFFFFFFFFFFFFFFFFFFFFFFFFFFFFFFFFFFF:  
@A00155:342:HHGFNDSXY:1:1404:16613:2331 1:N:0:GAACCTAG+TCCGCATA  
CCGCCACACCGCCTTAGATCAGCTGTGTCCACTTAAGGACTCACCTCTGGCCTATGGTCATCTCAATG  
CCGAGAGGGATGTGGAGGGCGAGAGAGAGCGACTTCTCTCGGGCCCACAGCCTTACAGCTGTGGAGCA  
+  
FFFFFFFFFFFFFFF:FFFFFFFFFFFFFFFFFFFFF:FFFFFFFFFFFFFFFFFFFFFFFFFFFFFFFFFFFFF,  
FFFFFFFFFFFFF,FFFFFFFFFFFFFFFFFFFFFFFFFFFFF:FFFFFFFFFFFFFFFFFFFFFFFFFFFFF:  
@A00155:342:HHGFNDSXY:1:1404:6903:16423 1:N:0:GAACCTAG+TCCGCATA  
GTCCACTTAAGGACTCACCTCTGGCCTATGGTCATCTCAATGCCGAGAGGGATGTGAAGGGCGAGAGA  
GAGCGACTTCTCTCGGGCCCACAGCCTTACAGCTGTGGAGCACGGTATCCTCTGCCGAAACAGAGGTT  
+  
FFFFFFF:FFFFFFFFFFFFFFFFFFFFFFFFFFFFF:FFFFFFFFF:FFFFFFFFFFFFFFFFFFFFFFFFFFFFF  
FFFFFFFFFFFFFFFFFFFFFFFFFFFFF:FFFFFFFFFFFFFFFFFFFFFFFFFFFFFFFFFFFFFFFFFFFFF  
@A00155:342:HHGFNDSXY:1:1404:7491:17096 1:N:0:GAACCTAG+TCCGCATA  
AGTTTTCGTCCTAAAAAGGACTCGTCAGGTAGCCTACTAGACTACGACTTAC  
+  
::FFFFFFFFF:FF:FFFFFFFFFFFFFFFFFFFFFFFFFFFFFFFFFFFFFFFFFFFFFFFFFFFFF  
@A00155:342:HHGFNDSXY:1:1404:3667:19774 1:N:0:GAACCTAG+TCCGCATA  
CTTCTCTCGGGCCCACAGCCTTACAGCTGTGGAGCACGGTATCCTCTGCCGAAACAGAGGTTGGACAA  
GACCGGAGGGGTCTCCTAGTTCCAAAGGAGATGTACTCCGGGCTTGTTACGACCTACCGTGTAAGTC  
+  
FFFFFFFFFFFFFFFFFFFFFFFFFFFFFFFFFFFFFFFFFFFFFFFFFFFFFFFFFFFFFFFFFFFFFFFFFFFFF:  
FFFFFFFFFFFFFFFFFFFFFFFFFFFFFFFFFFFFFFFFFFFFFFFFFFFFFFFFFFFFFFFFFFFFFFFFFFFFF:  
@A00155:342:HHGFNDSXY:1:1405:10149:21261 1:N:0:GAACCTAG+TCCGCATA  
CTCAATGCCGAGAGGGATGTAGAGGGCGAGAGAGAGCGACTTCTCTCGGGCCCACAGCCTTACAGCTG  
TGGAGCACGGTATCCTCTGCCGAAACAGAGGTTGGACAAGACCGGAGGGGTCTCCTAGTTCCAAAGGA  
+  
FFFFFFFFFFFFFFFFFFFFFFFFFFFFFFFFFFFFFFFFFFFFFFFFFFFFFFFFFFFFFFFFFFFFFFFFFFFFF:  
FFFFFFFFFFFFFFFFFFFFFFFFFFFFFFFFFFFFFFFFFFFFFFFFFFFFFFFFFFFFFFFFFFFFFFFFFFFFF:  
@A00155:342:HHGFNDSXY:1:1406:4065:2237 1:N:0:GAACCTAG+TCCGCATA  
ACTTCTCTCGGGCCCACAGCCTTACAGCTGTGGAGCACGGTATCCTCTGCCGAAACAGAGGTTGGACA  
AGACCGGAGGGGTCTCCTAGTTCCAAAGGAGATGTACTCCGACTTGTTACGACCTACCGTGTAAGT  
+  
FFFFFFFFFFFFFFFFFFFFFFFFFFFFFFFFFFFFFFFFFFFFFFFFFFFFFFFFFFFFFFFFFFFFFFFFFFFFF:  
FFFFFFFFFFFFFFFFFFFFFFFFFFFFFFFFFFFFFFFFFFFFFFFFFFFFFFFFFFFFFFFFFFFFFFFFFFFFF:  
@A00155:342:HHGFNDSXY:1:1406:30156:30608 1:N:0:GAACCTAG+TCCGCATA  
CACGGTATCCTCTGCCGAAACAGAGGTTGGACAAGACCGGAGGGGTCTCCTAGTTCCAAAGGAGATGT

ACTCCGGGCTTGTTACGACCTACCGTGTAAGTCGTAGTCTAGTAGGCTACCTGACGAGTCCTTTTTTA  
+  
FFFFFFFFF:FFFFFF:FFFFFFFFFFFFFFFFFFFFFFFFFFFFFFFFFFFFFFFFFFFFFFFFFFFFFFFF  
FFFFFFFFFFFFFFFFFFFFFFFFFFFFFFFFFFFFFFFFFFFFFFFFFFFFFFFFFFFFFFFFFFFFFFFFF:FFFFFFFFFFFFFFFF  
@A00155:342:HHGFNDSXY:1:1406:28158:33818 1:N:0:GAACCTAG+TCCGCATA  
GGCGAGAGAGAGCGACTTCTCTCGGGCCCACAGCCTTACAGCTGTGGAGCACGGTATCCTCTGCCGAA  
ACAGAGGTTGGACAAGACCGGAGGGGTCTCCTAGTTCCAAAGGAGATGTACTCCGGGCTTGTTACGA  
+  
FFFFFFFFFFFFFFFFFFFFFFFFFFFFFFFFFFFFFFFFFFFFFFFFFFFFFFFFFFFFFFFFFFFFFFFFF:FFF  
FFFFFFFFFFFFFFFFFFFFFFFFFFFFFFFFFFFFFFFFFFFFFFFFFFFFFFFFFFFFFFFFFFFFFFFFF  
@A00155:342:HHGFNDSXY:1:1407:9661:7889 1:N:0:GAACCTAG+TCCGCATA  
AGGGCGAGAGAGAGCGACTTCTCTCGGGCCCACAGCCTTACAGCTGTGGAGCACGGTATCCTCTGCCG  
AAACAGAGGTTGGACAAGACCGGAGGGGTCTCCTAGTTCCAAAGGAGATGTACTCCGGGCTTGTTAC  
+  
FFFFFFFFFFFFFFFFFFFFFFFFFFFFFFFFFFFFFFFFFFFFFFFFFFFFFFFFFFFFFFFFFFFFFFFFF  
FFFFFFFFFFFFFFFFFFFFFFFFFFFFFFFFFFFFFFFFFFFFFFFFFFFFFFFFFFFFFFFFFFFFFFFFF,FF  
@A00155:342:HHGFNDSXY:1:1407:3432:25191 1:N:0:GAACCTAG+TCCGCATA  
GTCATCTCAATGCCGAGAGGGATGTAGAGGGCGAGAGAGAGCGACTTCTCTCGGGCCCACAGCCTTAC  
AGCTGTGGAGCACGGTATCCTCTGCCGAAACAGAGGTTGGACAAGACCGGAGGGGTCTCCTAGTTCCA  
+  
FFFFFFFFFFFFFFFFFFFFFFFFFFFFFFFFFFFFFFFFFFFFFFFFFFFFFFFFFFFFFFFFFFFFFFFFF  
FFFFFFFFFFFFFFFFFFFFFFFFFFFFFFFFFFFFFFFFFFFFFFFFFFFFFFFFFFFFFFFFFFFFFFFFF,FF  
@A00155:342:HHGFNDSXY:1:1408:30029:12602 1:N:0:GAACCTAG+TCCGCATA  
GAGGGCGAGAGAGAGCGACTTCTCTCGGGCCCACAGCCTTACAGCTGTGGAGCACGGTATCCTCTGCC  
GAAACAGAGGTTGGACAAGACCGGAGGGGTCTCCTAGTTCCAAAGGAGATGTACTCCGGGCTTGTTCA  
+  
FFFFF:FFFFFFFFFFFFFFFFFFFFFFFFFFFFFFFFFFFFFFFFFFFFFFFFFFFFFFFFFFFFFFFFF  
FFFFFFFFFFFFFFFFFFFFFFFFFFFFFFFFFFFFFFFFFFFFFFFFFFFFFFFFFFFFFFFFFFFFFFFFF  
@A00155:342:HHGFNDSXY:1:1408:17508:12680 1:N:0:GAACCTAG+TCCGCATA  
AAAGACTCACCTCTGGCCTATGGTCATCTCAATGCCGAGAGGGATGTGGAGGGCGAGAGAGAGCGACT  
TCTCTCGGGCCCACAGCCTTACAGCTGTGGAGCACGGTATCCTCTGCCGAAACAGAGGTTGGACAAGA  
+  
FFF:FFF,FFF:F,FFFFFFFFFFFFFFFFFFFFFFFFFFFFFFFFFFFFFFFFFFFFFFFFFFFFFFFFF  
FFFFFFFFF:F:FFFFFFFF:FFFF,F,:,:FFFFFFFF:FFFF,:FFFF:FFFFFFFF,F:FFFFFFFF  
@A00155:342:HHGFNDSXY:1:1408:29523:14732 1:N:0:GAACCTAG+TCCGCATA  
GAGCGACTTCTCTCGGGCCCACAGCCTTACAGCTGTGGAGCACGGTATCCTCTGCCGAAACAGAGGTT  
GGACAAGACCGGAGGGGTCTCCTGGTTCCAAAGGAGATGTACTCCGGGCTTGTTACGACCTACCGTG  
+  
FFFFFFFFFFFFFFFFF:FFFFFFFFFFFFFFFFFFFFFFFFFFFFFFFFFFFFFFFFFFFFFFFFFFFFFFFF  
FFFFFFFFFFFFFFFFFFFFFFFFFFFFFFFFFFFFFFFFFFFFFFFFFFFFFFFFFFFFFFFFFFFFFFFFF  
@A00155:342:HHGFNDSXY:1:1408:17571:18897 1:N:0:GAACCTAG+TCCGCATA  
AGCGACTTCTCTCGGGCCCACAGCCTTACAGCTGTGGAGCACGGTATCCTCTGCCGAAACAGAGGTTG  
GACAAGACCGGAGGGGTCTCCTAGTTCCAAAGGAGATGTACTCCGGGCTTGTTACGACCTACCGTGT  
+  
FFFFFFF:FFFFFFFFFFFFFFFFFFFFFFFFFFFFFFFFFFFFFFFFFFFFFFFFFFFFFFFFFFFFFFFFF  
FFFFFFFFFFFFFFFFFFFFFFFFFFFFFFFFFFFFFFFFFFFFFFFFFFFFFFFFFFFFFFFFFFFFFFFFF  
@A00155:342:HHGFNDSXY:1:1408:18891:29387 1:N:0:GAACCTAG+TCCGCATA  
ACTTCTCTCGGGCCCACAGCCTTACAGCTGTGGAGCACGGTATCCTCTGCCGAAACAGAGGTTGGACA  
AGACCGGAGGGGTCTCCTAGTTCCAAAGGAGATGTACTCCGGGCTTGTTACGACCTACCGTGTAAG  
+  
FFFFFFFFFFFFFFFFFFFFFFFFFFFFFFFFFFFFFFFFFFFFFFFFFFFFFFFFFFFFFFFFF:FFFFFFF:FFFFFFFFF:FFF  
FFFFFFFFFFFFFFFFFFFFFFFFFFFFFFFFFFFFFFFFFFFFFFFFFFFFFFFFFFFFFFFFF,FFFFFFFFFFFFFFFFFFFFFFFFF  
@A00155:342:HHGFNDSXY:1:1408:19759:31923 1:N:0:GAACCTAG+TCCGCATA  
AGAGAGAGCGACTTCTCTCGGGCCCACAGCCTTACAGCTGTGGAGCACGGTATCCTCTGCCGAAACAG

AGGTTGGACAAGACCGGAGGGGTCTCCTAGTTCCAAAGGAGATGTACTCCGGGCTTGTTACACGACCTA  
+  
FFFFFFFFFFFFFFFFFFFFFFFFFFFFFFFFFFFFFFFFFFFFFFFFFFFFFFFFFFFFFFFFFFFFFFFFFFFF  
FFFFFFFFFFFFFF:FFFFFFFFFFFFFFFFFFFFFFFFFFFFFFFFFFFFFFFFFFFFFFFFFFFFFFFFFFFF  
@A00155:342:HHGFNDSXY:1:1409:20745:5259 1:N:0:GAACCTAG+TCCGCATA  
TCCTCTGCCGAAACAGAGGTTGGACAAGACCGGAGGGGTCTCCTAGTTCCAAAGGAGATGTACTCCGG  
GCTTGTTACACGACCTACCGTGTAAGTCGTAGTCTAGTAGGCTACCTGACGAGTCCTTTTTAGGACGAA  
+  
FFFFFFFFFFFFFFFFFFFFFFFFFFFFFFFFFFFFFFFFFFFFFFFFFFFFFFFFFFFFFFFFFFFFFFFFFFFF  
FFFFFFFFFFFFFFFFFFFFFFFFFFFFFFFFFFFFFFFFFFFFFFFFFFFFFFFFFFFFFFFFFFFFFFFFFFFF  
@A00155:342:HHGFNDSXY:1:1409:17381:7889 1:N:0:GAACCTAG+TCCGCATA  
CTTCTCTCGGGCCACAGCCTTACAGCTGTGGAGCACGGTATCCTCTGCCGAAACAGAGGTTGGACAA  
GACCGGAGGGGTCTCCTGGTTCCAAAGGAGATGTACTCCGGGCTTGTTACACGACCTACCGTGTAAGTC  
+  
FFFFFFFFFFFFFFFFFFFFFFFFFFFFFFFFFFFFFFFFFFFFFFFFFFFFFFFFFFFFFFFFFFFFFFFFFFFF  
FFFFFFFFFFFFFFFFFFFFFFFFFFFFFFFFFFFFFFFFFFFFFFFFFFFFFFFFFFFFFFFFFFFFFFFFFFFF  
@A00155:342:HHGFNDSXY:1:1409:13512:14935 1:N:0:GAACCTAG+TCCGCATA  
GAGGGCGAGAGAGAGCGACTTCTCTCGGGCCACAGCCTTACAGCTGTGGAGCACGGTATCCTCTGCC  
GAAACAGAGGTTGGACAAGACCGGAGGGGTCTCCTAGTTCCAAAGGAGATGTACTCCGGGCTTGTTCA  
+  
FFFFFFFFFFFFFFFFFFFFFFFFFFFFFFFFFFFFFFFFFFFFFFFFFFFFFFFFFFFFFFFFFFFFFFFFFFFF  
FFFFFFFFFFFFFFFFFFFFFFFFFFFFFFFFFFFFFFFFFFFFFFFFFFFFFFFFFFFFFFFFFFFFFFFFFFFF  
@A00155:342:HHGFNDSXY:1:1409:6641:17942 1:N:0:GAACCTAG+TCCGCATA  
GCGACTTCTCTCGGGCCACAGCCTTACAGCTGTGGAGCACGGTATCCTCTGCCGAAACAGAGGTTGG  
ACAAGACCGGAGGGGTCTCCTAGTTCCAAAGGAGATGTACTCCGGGCTTGTTACACGACCTACCGTGTA  
+  
FFFFFFFFFFFFFFFFFFFFFFFFFFFFFFFFFFFFFFFFFFFFFFFFFFFFFFFFFFFFFFFFFFFFFFFFFFFF  
FFFFFFFFFFFFFFFFFFFFFFFFFFFFFFFFFFFFFFFFFFFFFFFFFFFFFFFFFFFFFFFFFFFFFFFFFFFF  
@A00155:342:HHGFNDSXY:1:1409:19081:22200 1:N:0:GAACCTAG+TCCGCATA  
AGAGAGAGCGACTTCTCTCGGGCCACAGCCTTACAGCTGTGGAGCACGGTATCCTCTGCCGAAACAG  
AGGTTGGACAAGACCGGAGGGGTCTCCTAGTTCCAAAGGAGATGTACTCCGGGCTTGTTACACGACCTA  
+  
FFFFFFFFFFFFFFFFFFFFFFFFFFFFFFFFFFFFFFFFFFFFFFFFFFFFFFFFFFFFFFFFFFFFFFFFFFFF  
FFFFFFFFFFFFFFFFFFFFFFFFFFFFFFFFFFFFFFFFFFFFFFFFFFFFFFFFFFFFFFFFFFFFFFFFFFFF  
@A00155:342:HHGFNDSXY:1:1409:28664:25144 1:N:0:GAACCTAG+TCCGCATA  
GTATCCTCTGCCGAAACAGAGGTTGGACAAGACCGGAGGGGTCTCCTAGTTCCAAAGGAGATGTACTC  
CGGGCTTGTTACACGACCTACCGTGTAAGTCGTAGTCTAGTAGGCTACCTGACGAGTCCTTTTTAGGAC  
+  
FFFFFFFFFFFFFFFFFFFFFFFFFFFFFFFFFFFFFFFFFFFFFFFFFFFFFFFFFFFFFFFFFFFFFFFFFFFF  
FFFFFFFFFFFFFFFFFFFFFFFFFFFFFFFFFFFFFFFFFFFFFFFFFFFFFFFFFFFFFFFFFFFFFFFFFFFF  
@A00155:342:HHGFNDSXY:1:1409:29116:25426 1:N:0:GAACCTAG+TCCGCATA  
GTATCCTCTGCCGAAACAGAGGTTGGACAAGACCGGAGGGGTCTCCTAGTTCCAAAGGAGATGTACTC  
CGGGCTTGTTACACGACCTACCGTGTAAGTCGTAGTCTAGTAGGCTACCTGACGAGTCCTTTTTAGGAC  
+  
FFFFFFFFFFFFFFFFFFFFFFFFFFFFFFFFFFFFFFFFFFFFFFFFFFFFFFFFFFFFFFFFFFFFFFFFFFFF  
FFFFFFFFFFFFFFFFFFFFFFFFFFFFFFFFFFFFFFFFFFFFFFFFFFFFFFFFFFFFFFFFFFFFFFFFFFFF  
@A00155:342:HHGFNDSXY:1:1409:11614:29716 1:N:0:GAACCTAG+TCCGCATA  
ACTTCTCTCGGGCCACAGCCTTACAGCTGTGGAGCACGGTATCCTCTGCCGAAACAGAGGTTGGACA  
AGACCGGAGGGGTCTCCTAGTTCCAAAGGAGATGTACTCCGGGCTTGTTACACGACCTACCGTGTAAGT  
+  
FFFFFFFFFFFFFFFFFFFFFFFFFFFFFFFFFFFFFFFFFFFFFFFFFFFFFFFFFFFFFFFFFFFFFFFFFFFF  
FFFFFFFFFFFFFFFFFFFFFFFFFFFFFFFFFFFFFFFFFFFFFFFFFFFFFFFFFFFFFFFFFFFFFFFFFFFF  
@A00155:342:HHGFNDSXY:1:1410:9805:8547 1:N:0:GAACCTAG+TCCGCATA  
GAGAGGGATGTGGAGGGCGAGAGAGAGCGACTTCTCTCGGGCCACAGCCTTACAGCTGTGGAGCACG

GTATCCTCTGCCGAAACAGAGGTTGGACAAGACCGGAGGGGTCTCCTAGTTCCAAAGGAGATGTACTC  
+  
FFFFFFFFFFFFFFFFFFFFFFFFFFFFFFFFFFFFFFFFFFFFFFFFFFFFFFFFFFFFFFFFFFFFFFFF  
FFFFFFFFFFFFFFFFFFFFFFFFFFFFFFFFFFFFFFFFFFFFFFFFFFFFFFFFFFFFFFFFFFFFFFFF  
@A00155:342:HHGFNDSXY:1:1410:6696:22044 1:N:0:GAACCTAG+TCCGCATA  
GAGCGACTTCTCTCGGGCCACAGCCTTACAGCTGTGGAGCACGGTATCCTCTGCCGAAACAGAGGTT  
GGACAAGACCGGAGGGGTCTCCTAGTTCCAAAGGAGATGTACTCCGGGCTTGTTACGACCTACCGTG  
+  
FFFFFFFFFFFFFFFFFFFFFFFFFFFFFFFFFFFFFFFFFFFFFFFFFFFFFFFFFFFFFFFFFFFFFFFF  
FFFFFFFFFFFFFFFFFFFFFFFFFFFFFFFFFFFFFFFFFFFFFFFFFFFFFFFFFFFFFFFFFFFFFFFF  
@A00155:342:HHGFNDSXY:1:1410:1597:26459 1:N:0:GAACCTAG+TCCGCATA  
CCTTACAGCTGTGGTGACGGTATCCTCTGCCGAAACAGAGGTTGGACAAGACCGGAGGGGTCTCCTA  
GTTCCAAAGGAGATGTACTCCGGGCTTGTTACGACCTACCGTGTAAGTCGTAGTCTAGTAGGCTACC  
+  
FFFFFFFFFFFF:FFFFFF:FFFFFFFFFFFFFFFFFFFFFFFFFFFFFFFFFFFFFFFFFFFFFFFF: :FFFFFFFFFFFFFFFF  
FFFFF:FFFFFFFFFFFFFFFFFFFFFFFFFFFFFFFFFFFFFFFFFFFFFFFFFFFFFFFFFFFFFFFF  
@A00155:342:HHGFNDSXY:1:1410:2121:27649 1:N:0:GAACCTAG+TCCGCATA  
ACTTCTCTCGGGCCACAGCCTTACAGCTGTGGAGCACGGTATCCTCTGCCGAAACAGAGGTTGGACA  
AGACCGGAGGGGTCTCCTAGTTCCAAAGGAGATGTACTCCGGGCTTGTTACGACCTACCGTGTAAGT  
+  
FFFFFFFFFFFFFFFFFFFFFFFFFFFFFFFFFFFFFFFFFFFFFFFFFFFFFFFFFFFFFFFFFFFFFFFF  
FF:FFFFFFFFFFFFFFFFFFFFFFFFFFFFFFFFFFFFFFFFFFFFFFFFFFFFFFFFFFFFFFFFFFFF,FFFFFFFFFFFFFFFF  
@A00155:342:HHGFNDSXY:1:1410:25319:35697 1:N:0:GAACCTAG+TCCGCATA  
GAGCGACTTCTCTCGGGCCACAGCCTTACAGCTGTGGAGCACGGTATCCTCTGCCGAAACAGAGGTT  
GGACAAGACCGGAGGGGTCTCCTAGTTCCAAAGGAGATGTACTCCGGGCTTGTTTACGACCTACCGTG  
+  
FFFFFFFFFFFFFFFFFFFFFFFFFFFFFFFFFFFFFFFFFFFFFFFFFFFFFFFFFFFFFFFFFFFFFFFF  
FFFFFFFFFFFFFFFFFFFFFFFFFFFFFFFFFFFFFFFFFFFFFFFFFFFFFFFFFFFFFFFFFFFFFFFF  
@A00155:342:HHGFNDSXY:1:1411:26756:11193 1:N:0:GAACCTAG+TCCGCATA  
CCACATCCCTCTCGGTATTGAGATGACCATAGGCCAGAGGTGAGTCCTTAAGTGACACAGCTGATCT  
AAGGCGGTGTGGCGGGGCATGGGTTGAACCCCATGACGGTCGGAGTCTAGTAGGCTCCCTGATGAG  
+  
FFFFFFFFFFFFFFFFFFFF:FFFFFFFFFFFFFFFFFFFFFFFFFFFFFFFFFFFFFFFFFFFFFFFFFFFF  
FFFFFFFFFFFFFFFFFFFFFFFFFFFFFFFFFFFFFFFFFFFFFFFFFFFFFFFFFFFFFFFFFFFFFFFF  
@A00155:342:HHGFNDSXY:1:1411:9136:23202 1:N:0:GAACCTAG+TCCGCATA  
TGGTCATCTCAATGCCGAGAGGGATGTGGAGGGCGAGAGAGAGCGACTTCTCTCGGGCCACAGCCTT  
ACAGCTGTGGAGCACGGTATCCTCTGCCGAAACAGAGGTTGGACAAGACCGGAGGGGTCTCCTAGTTC  
+  
FFFFFFFFFFFFFFFFFFFF:FFFFFFFFFFFFFFFFFFFFFFFFFFFFFFFFFFFFFFFFFFFFFFFFFFFF, F  
FFFFFFFFFFFFFFFFFFFFFFFFFFFFFFFFFFFFFFFFFFFFFFFFFFFFFFFFFFFFFFFFFFFFFFFF  
@A00155:342:HHGFNDSXY:1:1412:10945:17033 1:N:0:GAACCTAG+TCCGCATA  
GGATGTGGAGGGCGAGAGAGAGCGACTTCTCTCGGGCCACAGCCTTACAGCTGTGGAGCACGGTATC  
CTCTGCCGAAACAGAGGTTGGACAAGACCGGAGGGGTCTCCTAGTTCCAAAGGAGATGTACTCC  
+  
FFF:FFFFFFFFFFFFFFFFFFFFFFFFFFFFFFFFFFFFFFFFFFFFFFFFFFFFFFFFFFFFFFFFFFFF  
FFFFFFFFFFFF:FFFFFFFFFFFFFFFFFFFFFFFFFFFFFFFFFFFFFFFFFFFFFFFFFFFFFFFFFFFF  
@A00155:342:HHGFNDSXY:1:1412:21649:17315 1:N:0:GAACCTAG+TCCGCATA  
AGCGACTTCTCTCGGGCCACAGCCTTACAGCTGTGGAGCACGGTATCCTCTGCCGAAACAGAGGTTG  
GACAAGACCGGAGGGGTCTCCTAGTTCCAAAGGAGATGTACTCCGGGCTTGTTACGACCTACCGTGT  
+  
FFFFFFFFFFFFFFFFFFFFFFFFFFFFFFFFFFFFFFFFFFFFFFFFFFFFFFFFFFFFFFFFFFFFFFFF  
FFFFFFFFFFFFFFFFFFFFFFFFFFFFFFFFFFFFFFFFFFFFFFFFFFFFFFFFFFFFFFFFFFFFFFFF:FFFFFFF  
@A00155:342:HHGFNDSXY:1:1413:7943:1532 1:N:0:GAACCTAG+TCCGCATA  
AAGGACTCACCTCTGGCCTATGGTCATCTCAATGCCGAGAGGGATGTGAAGGGCGAGAGAGAGCGACT

TCTCTCGGGCCACAGCCTTACAGCTGTGGAGCACGGTATCCTCTGCCGAAACAGAGGTTGGACAAGA  
+  
FFFFFFFFFFFFFFFFFFFFFFFFFFFFFFFFFFFFFFFFFFFFFFFFFFFFFFFFFFFFFFFFFFFFF:FFFFFFFFFFFFFFFFFFFFFFFFFFFFFFF  
FFFFFFFFFFFFFFFFFFFFFFFFFFFFFFFFFFFFFFFFFFFFFFFFFFFFFFFFFFFFFFFFFFFFFFFFF:FFFFFFFFFFFFFFFFFFFFFFFFFFFFFFF  
@A00155:342:HHGFNDSXY:1:1413:31512:2206 1:N:0:GAACCTAG+TCCGCATA  
ATCTCAATGCCGAGAGGGATGTGGAGGGCGAGAGAGAGCGACTTCTCTCGGGCCCACAGCCTTACAGC  
TGTGGAGCACGGTATCCTCTGCCGAAACAGAGGTTGGACAAGACCGGAGGGGTCTCCTAGTTCCAAAG  
+  
FFFFFFFFFFFFFFFFFFFFFFFFFFFFFFFFFFFFFFFFFFFFFFFFFFFFFFFFFFFFFFFFFFFFFFFFF  
FFFFFFFFFFFFFFFFFFFFFFFFFFFFFFFFFFFFFFFFFFFFFFFFFFFFFFFFFFFFFFFFFFFFFFFFF:FFFFFFFFFFFFFFFFFFFFFFFFFFFFFFF  
@A00155:342:HHGFNDSXY:1:1413:3739:21496 1:N:0:GAACCTAG+TCCGCATA  
GGATGTGGAGGGCGAGAGAGAGCGACTTCTCTCGGGCCCACAGCCTTACAGCTGTGGAGCACGGTATC  
CTCTGCCGAAACAGAGGTTGGACAAGACCGGAGGGGTCTCCTAGTTCCAAAGGAGATGTACTCC  
+  
FFFFFFFFFFFFFFFFFFFFFFFFFFFFFFFFFFFFFFFFFFFFFFFFFFFFFFFFFFFFFFFFFFFFFFFFF  
FFFFFFFFFFFFFFFFFFFFFFFFFFFFFFFFFFFFFFFFFFFFFFFFFFFFFFFFFFFFFFFFFFFFFFFFF:FFFFFFFFFFFFFFFFFFFFFFFFFFFFFFF, FFFFFFFFFFFFFFFF  
@A00155:342:HHGFNDSXY:1:1413:30183:34444 1:N:0:GAACCTAG+TCCGCATA  
CTTCTCTCGGGCCCACAGCCTTACAGCTGTGGAGCACGGTATCCTCTGCCGAAACAGAGGTTGGACAA  
GACCGGAGGGGTCTCCTAGTTCCAAAGGAGATGTACTCCGGGCTTGTTTCACGACCTACCGTGTA  
+  
FFFFFFFFFFFFFFFFFFFFFFFFFFFF:F, FFFFFFFFFFFFFFFFFFFFFFFFFFFFFFFFFFFFFF:FFFFFFFFFFFFFFFFFFFFFFFFFFFF:F  
FFFFFFFFFFFFFFFFFFFFFFFFFFFFFFFFFFFFFFFFFFFFFFFFFFFFFFFFFFFFFFFFFFFFFFFFF:FFFFFFFFFFFFFFFFFFFFFFFFFFFFFFFFF  
@A00155:342:HHGFNDSXY:1:1414:11017:2002 1:N:0:GAACCTAG+TCCGCATA  
TGTTTCGGCAGAGGATACCGTGCTCCACAGCTGTAAGGCTGTGGGCCCCGAGAGAAGTCGCTCTCTCTC  
GCCCTCTACATCCCTCTCGGCATTGAGATGACCATAGGCCAGAGGTGAGTCCTTAAGTGGACACAGCT  
+  
FFFFFFFFFFFFFFFFFFFFFFFFFFFFFFFFFFFFFFFFFFFFFFFFFFFFFFFFFFFFFFFFFFFFFFFFF:FFFFFFFFFFFFFFFFFFFFFFFFFFFFFFFFF  
FFFFFFFFFFFFFFFFFFFFFFFFFFFFFFFFFFFFFFFFFFFFFFFFFFFFFFFFFFFFFFFFFFFFFFFFF:FFFFFFFFFFFFFFFFFFFFFFFFFFFFFFFFF  
@A00155:342:HHGFNDSXY:1:1414:30002:4100 1:N:0:GAACCTAG+TCCGCATA  
CGAGAGAGAGCGACTTCTCTCGGGCCCACAGCCTTACAGCTGTGGAGCACGGTATCCTCTGCCGAAAC  
AGAGGTTGGACAAGACCGGAGGGGTCTCCTTGTTCCAAAGGAGATGTACTCCGGGCTTGTTTCACGACC  
+  
FFFFFFFFFFFFFFFFFFFFFFFFFFFFFFFFFFFFFFFFFFFFFFFFFFFFFFFFFFFFFFFFFFFFFFFFF:FFFFFFFFFFFFFFFFFFFFFFFFFFFFFFFFF  
FFFFFFFFFFFFFFFFFFFFFFFFFFFFFFFFFFFFFFFFFFFFFFFFFFFFFFFFFFFFFFFFFFFFFFFFF:FFFFFFFFFFFFFFFFFFFFFFFFFFFFFFFFF  
@A00155:342:HHGFNDSXY:1:1414:7853:27242 1:N:0:GAACCTAG+TCCGCATA  
CCACATCCCTCTCGGCATTGAGATGACCATAGGCCAGAGGTGAGTCCTTAAGTGGACACAGCTGATCT  
AAGGCGGTGTGGCGGGCATGGGTTTGAACCCCATGACGGTCGGAGTCTAGTAGGCTCCCTGATGAG  
+  
FFFFFFFFFFFFFFFFFFFFFFFFFFFF:FFFFFFFFFFFF, FFFFFFFFFFFFFFFFFFFFFFFFFFFFFFFFFFFFFF:FFFFFFFFFFFFFFFFFFFFFFFFFFFFFFFFF  
FFFFFFFFFFFFFFFFFFFFFFFFFFFFFFFFFFFFFFFFFFFFFFFFFFFFFFFFFFFFFFFFFFFFFFFFF:FFFFFFFFFFFFFFFFFFFFFFFFFFFFFFFFF  
@A00155:342:HHGFNDSXY:1:1415:6867:1047 1:N:0:GAACCTAG+TCCGCATA  
GACTCACCTCTGGCCTATGGTCATCTCAATGCCGAGAGGGATGTGGAGGGCGAGAGAGAGCGACTTCT  
CTCGGGCCCACAGCCTTACAGCTGTGGAGCACGGTATCCTTTGCCGAAACAGAGGTTGGAC  
+  
FFFFFFFFFFFFFFFFFFFFFFFFFFFFFFFFFFFFFFFFFFFFFFFFFFFFFFFFFFFFFFFFFFFFFFFFF:FFFFFFF, FFFF:FFFFFFFFFFFFFFFFFFFFFFFFFFFFF  
FFFFFFFFFFFFFFFFFFFFFFFFFFFFFFFFFFFFFFFFFFFFFFFFFFFFFFFFFFFFFFFFFFFFFFFFF:FFFFFFFFFFFFFFFFFFFFFFFFFFFFFFFFF  
@A00155:342:HHGFNDSXY:1:1415:28384:5149 1:N:0:GAACCTAG+TCCGCATA  
TCGGCAGAGGATACCGTGCTCCACAGCTGTAAGGCTGTGGGCCCCGAGAGAAGTCGCTCTCTCTCGCCC  
TCTACATCCCTCTCGGCATTGAGATGACCATAGGCCAGAGGTGAGTCCTTAAGTGGACACA  
+  
FFFFFFFFFFFFFFFFFFFFFFFFFFFFFFFFFFFFFFFFFFFFFFFFFFFFFFFFFFFFFFFFFFFFFFFFF:FFFFFFFFFFFFFFFFFFFFFFFFFFFFFFFFF  
FFFFFFFFFFFFFFFFFFFFFFFFFFFFFFFFFFFFFFFFFFFFFFFFFFFFFFFFFFFFFFFFFFFFFFFFF:FFFFFFFFFFFFFFFFFFFFFFFFFFFFFFFFF  
@A00155:342:HHGFNDSXY:1:1415:10791:17174 1:N:0:GAACCTAG+TCCGCATA  
AGGGATGTGGAGGGCGAGAGAGAGCGACTTCTCTCGGGCCCACAGCCTTACAGCTGTGGAGCACGGTA

TCCTCTGCCGAAACAGAGGTTGGACAAGACCGGAGGGGTCTCCTAGTTCCAAAGGAGATGTACT  
+  
FFFFFFFFFFFFFFFFFFFFFFFFFFFFFFFFFFFFFFFFFFFFFFFFFFFFFFFFFFFFFFFFFFFFFFFF  
FFFFFFFFFFFFFFFFFFFFFFFFFFFFFFFFFFFFFFFFFFFFFFFFFFFFFFFFFFFFFFFFFFFFFFFF  
@A00155:342:HHGFNDSXY:1:1415:20311:19351 1:N:0:GAACCTAG+TCCGCATA  
CTCCTCTGGCCTATGGTCATCTCAATGCCGAGAGGGATGTGGAGGGCGAGAGAGAGCGACTTCTCTCG  
GGCCACAGCCTTACAGCTGTGGAGCACGGTATCCTCTGCCGAAACAGAGGTTGGACAAGACCGGAGG  
+  
FFFFFFFFFFFFFFFFFFFFFFFFFFFFFFFFFFFFFFFFFFFFFFFFFFFFFFFFFFFFFFFFFFFFFFFF:FFFFFFF  
FFFFFFFFFFFFFFFFFFFFFFFFFFFFFFFFFFFFFFFFFFFFFFFFFFFFFFFFFFFFFFFFFFFFFFFF  
@A00155:342:HHGFNDSXY:1:1416:1877:1297 1:N:0:GAACCTAG+TCCGCATA  
CTTCTCTCGGGCCACAGCCTTACAGCTGTGGAGCACGGTATCCTCTGCCGAAACAGAGGTTGGACAA  
GACCGGAGGGGTCTCCTAGTTCCAAAGGAGATGTACTCCGGGCTTGTTACGACCTACCGTGTAAGTC  
+  
FFFFF:FFFFFFFFFFFFFFFFFFFFFFFFFFFFFFFFFFFFFFFFFFFFFFFFFFFFFFFFFFFFFFFF  
FFFFFFFFFFFFFFFFFFFFFFFFFFFFFFFFFFFFFFFFFFFFFFFFFFFFFFFFFFFFFFFFFFFFFFFF:FFFFFFF::FFFFFFFFFFFFFFFFFFFFFFFF  
@A00155:342:HHGFNDSXY:1:1416:15176:6699 1:N:0:GAACCTAG+TCCGCATA  
ACCCCTCCGGTCTTGTCCAACCTCTGTTTCGGCAGAGGATACCGTGCTCCACAGCTGTAAGGCTGTGG  
GCCCGAGAGAAGTCGCTCTCTCTCGCCCTCTACATCCCTCTCGGCATTGAGATGACCATAGGCCAGAG  
+  
FFFFFFFFFFFFFFF:FFFFFFFFFFFFFFFFFFFFFFFFFFFFFFFFFFFFFFFFFFFFFFFFFFFFFFFF  
FFFFFFFFFFFFFFFFFFFFFFFFFFFFFFFFFFFFFFFFFFFFFFFFFFFFFFFFFFFFFFFFFFFFFFFF:FFFFFFF  
@A00155:342:HHGFNDSXY:1:1417:24243:8406 1:N:0:GAACCTAG+TCCGCATA  
GATGTGGAGGGCGAGAGAGAGCGACTTCTCTCGGGCCACAGCCTTACAGCTGTGGAGCACGGTATCC  
TCTGCCGAAACAGAGGTTGGACAAGACCGGAGGGGTCTCCTAGTTCCAAAGGAGATGTACTCCGGGCT  
+  
FFFFFFFFFFFFFFFFFFFFFFFFFFFFFFFFFFFFFFFFFFFFFFFFFFFFFFFFFFFFFFFFFFFFFFFF  
FFFFFFFFFFFFFFF:FFFFFFFFFFFFFFFFFFFFFFFFFFFFFFFFFFFFFFFFFFFFFFFFFFFFFFFF  
@A00155:342:HHGFNDSXY:1:1417:20347:19132 1:N:0:GAACCTAG+TCCGCATA  
CTTCTCTCGGGCCACAGCCTTACAGCTGTGGAGCACGGTATCCTCTGCCGAAACAGAGGTTGGACAA  
GACCGGAGGGGTCTCCTGGTTCCAAAGGAGATGTACTCCGGGCTTGTTACGACCTACCGTGTAAGTC  
+  
FFFFFFFFFFFFFFFFFFFFFFFFFFFFFFFFFFFFFFFFFFFFFFFFFFFFFFFFFFFFFFFFFFFFFFFF  
FFFFFFFFFFFFFFFFFFFFFFFFFFFFFFFFFFFFFFFFFFFFFFFFFFFFFFFFFFFFFFFFFFFFFFFF:FFFFFFF  
@A00155:342:HHGFNDSXY:1:1417:20184:23077 1:N:0:GAACCTAG+TCCGCATA  
GAGAGGGATGTAGAGGGCGAGAGAGAGCGACTTCTCTCGGGCCACAGCCTTACAGCTGTGGAGCACG  
GTATCCTCTGCCGAAACAGAGGTTGGACAAGACCGGAGGGGTCTCCTAGTTCCAAAGGAGATGTACTC  
+  
FFFFFFFFFFFFFFFFFFFFFFFFFFFFFFFFFFFFFFFFFFFFFFFFFFFFFFFFFFFFFFFFFFFFFFFF  
FFFFFFFFFFFFFFFFFFFFFFFFFFFFFFFFFFFFFFFFFFFFFFFFFFFFFFFFFFFFFFFFFFFFFFFF  
@A00155:342:HHGFNDSXY:1:1418:10402:2096 1:N:0:GAACCTAG+TCCGCATA  
TGCCCCGCCACACCGCCTTAGATCAGCTGTGTCCACTTAAGGACTCACCTCTGGCCTATGGTCATCTC  
AATGCCGAGAGGGATGTGGAGGGCGAGAGAGAGCGACTTCTCTCGGGCCACAGCCTTACAGCTGTGG  
+  
::FFFFF:FFFFF:FF:FFFFFFFFFFFFFFFFFFFFFFFFFFFFFFFFFFFFFFFFFFFFFFFFFFFF  
FFFFFFFFF:FFFFFFFFF:FFFFFFFFFFFFFFFFFFFFFFFFFFFFFFFFFFFFFFFFFFFFFFFFFFFF  
@A00155:342:HHGFNDSXY:1:1418:5810:8641 1:N:0:GAACCTAG+TCCGCATA  
GTAAGGCTGTGGGCCCGAGAGAAGTCGCTCTCTCTCGCCCTCCACATCCCTCTCGGCATTGAGATGAC  
CATAGGCCAGAGGTGAGTCCTTAAGTGGACACAGCTGATCTAAGGCGGTGTGGCGGGGCATGGGTTTG  
+  
FFFFFFFFFFFFFFFFFFFFFFFFFFFFFFFFFFFFFFFFFFFFFFFFFFFFFFFFFFFFFFFFFFFFFFFF,FFFFFFFFF  
FFFFFFFFFFFFFFFFFFFFFFFFFFFFFFFFFFFFFFFFFFFFFFFFFFFFFFFFFFFFFFFFFFFFFFFF:FFF  
@A00155:342:HHGFNDSXY:1:1418:8558:15029 1:N:0:GAACCTAG+TCCGCATA  
CTCAATGCCGAGAGGGATGTGGAGGGCGAGAGAGAGCGACTTCTCTCGGGCCACAGCCTTACAGCTG



TGGAGCACGGTATCCTCTGCCGAAACAGAGGTTGGACAAGACCGGAGGGGTCTCCTAGTTCCAAAGGA  
+  
FFFFFFFFFFFFFFFFFFFFFFFFFFFFFFFFFFFFFFFFFFFFFFFFFFFFFFFFFFFFFFFFFFFFFFFF  
FFFFFFFFFFFFFFFFFFFFFFFFFFFFFFFFFFFFFFFFFFFFFFFFFFFFFFFFFFFFFFFFFFFFFFFF  
@A00155:342:HHGFNDSXY:1:1418:5927:19179 1:N:0:GAACCTAG+TCCGCATA  
ATCTCAATGCCGAGAGGGATGTGGAGGGCGAGAGAGAGCGACTTCTCTCGGGCCCACAGCCTTACAGC  
TGTGGAGCACGGTATCCTCTGCCGAAACAGAGGTTGGACAAGACCGGAGGGGTCTCCTAGTTCCAAAG  
+  
FFFFFFFFFFFFFF:FFFFFF:FFFFFFFFFFFFFFFFFFFFFFFFFFFFFFFFFFFFFFFFFFFFFFFF  
FFFFFFFFFFFFFFFFFFFFFFFFFFFFFFFFFFFFFFFFFFFFFFFFFFFFFFFFFFFFFFFFFFFFFFFF  
@A00155:342:HHGFNDSXY:1:1418:24704:23641 1:N:0:GAACCTAG+TCCGCATA  
ACTTCTCTCGGGCCCACAGCCTTACAGCTGTGGAGCACGGTATCCTCTGCCGAAACAGAGGTTGGACA  
AGACCGGAGGGGTCTCCTAGTTCCAAAGGAGATGTACTCCGGGCTTGTTACGACCTACCGTGTAAGT  
+  
FFFFFFFFFFFFFFFFFFFFFFFFFFFFFFFFFFFFFFFFFFFFFFFFFFFFFFFFFFFFFFFFFFFFFFFF  
FFFF:FFFFFFFFFFFFFFFFFFFFFFFFFFFFFFFFFFFFFFFFFFFFFFFFFFFFFFFFFFFFFFFF  
@A00155:342:HHGFNDSXY:1:1418:16179:27790 1:N:0:GAACCTAG+TCCGCATA  
CTCAATGCCGAGAGGGATGTGGAGGGCGAGAGAGAGCGACTTCTCTCGGGCCCACAGCCTTACAGCTG  
TGGAGCACGGTATCCTCTGCCGAAACAGAGGTTGGACAAGACCGGAGGGGTCTCCTAGTTCCAAAGGA  
+  
FFFFFFFFFFFFFFFFFFFFFFFFFFFFFFFFFFFFFFFFFFFFFFFFFFFFFFFFFFFFFFFFFFFFFFFF  
FFFFFFFFFFFFFFFFFFFFFFFFFFFFFFFFFFFFFFFFFFFFFFFFFFFFFFFFFFFFFFFFFFFFFFFF  
@A00155:342:HHGFNDSXY:1:1418:20952:28291 1:N:0:GAACCTAG+TCCGCATA  
CTTCTCTCGGGCCCACAGCCTTACAGCTGTGGAGCACGGTATCCTCTGCCGAAACAGAGGTTGGACAA  
GACCGGAGGGGTCTCCTAGTTCCAAAGGAGATGTACTCCGGGCTTGTTACGACCTACCGTGTAAGTC  
+  
FFFFFFFFFFFFFFFFFFFFFFFFFFFF,FFFFFFFFFFFFFFFFFFFFFFFFFFFFFFFFFFFFFFFFFFFF  
:FFFFFFFFFFFFFFFFFFFFFFFFFFFFFFFFFFFFFFFFFFFFFFFFFFFFFFFFFFFFFFFFFFFF  
@A00155:342:HHGFNDSXY:1:1419:14199:2628 1:N:0:GAACCTAG+TCCGCATA  
AGCGACTTCTCTCGGGCCCACAGCCTTACAGCTGTGGAGCACGGTATCCTCTGCCGAAACAGAGGTTG  
GACAAGACCGGAGGGGTCTCCTAGTTCCAAAGGAGATGTACTCCGGGCTTGTTACGACCTACCGTGT  
+  
FFFFFFFFFFFFFFFFFFFFFFFFFFFFFFFFFFFFFFFFFFFFFFFFFFFFFFFFFFFFFFFFFFFFFFFF  
FFFFF:FFFFFFFFFFFFFFFFFFFFFFFFFFFFFFFFFFFFFFFFFFFFFFFFFFFFFFFFFFFFFFFF  
@A00155:342:HHGFNDSXY:1:1419:7310:14622 1:N:0:GAACCTAG+TCCGCATA  
CTTCTCTCGGGCCCACAGCCTTACAGCTGTGGAGCACGGTATCCTCTGCCGAAACAGAGGTTGGACAA  
GACCGGAGGGGTCTCCTAGTTCCAAAGGAGATGTACTCCGGGCTTGTTACGACCTACCGTGTAAGTC  
+  
FFFFFFFFFFFFFFFFFFFFFFFFFFFFFFFFFFFFFFFFFFFFFFFFFFFFFFFFFFFFFFFFFFFFFFFF  
FFFFFFFFFFFFFFFFFFFFFFFFFFFFFFFFFFFFFFFFFFFFFFFFFFFFFFFFFFFFFFFFFFFFFFFF  
@A00155:342:HHGFNDSXY:1:1419:24189:20494 1:N:0:GAACCTAG+TCCGCATA  
GTAAGGCTGTGGGCCCCGAGAGAAGTCGCTCTCTCTCGCCCTCCACATCCCTCTCGGCATTGAGATGAC  
CATAGGCCAGAGGTGAGTCCTTAAGTGACACAGCTGATCTAAGGCGGTGTGGCGGGGCATGGGTTTG  
+  
FFFFFFFFFFFFFFFFFFFFFFFFFFFFFFFFFFFFFFFFFFFFFFFFFFFFFFFFFFFFFFFFFFFFFFFF  
FFF:FFFFFFFFFFFFFFFFFFFFFFFFFFFFFFFFFFFFFFFFFFFFFFFFFFFFFFFFFFFFFFFF  
@A00155:342:HHGFNDSXY:1:1420:12011:12211 1:N:0:GAACCTAG+TCCGCATA  
AGAGCGACTTCTCTCGGGCCCACAGCCTTACAGCTGTGGAGCACGGTATCCTCTGCCGAAACAGAGGT  
TGGACAAGACCGGAGGGGTCTCCTAGTTCCAAAGGAGATGTACTCCAGGCTTGTTACGACCTACCGT  
+  
FFFFFFFFFFFFFFFFFFFFFFFFFFFFFFFFFFFFFFFFFFFFFFFFFFFFFFFFFFFFFFFFFFFFFFFF  
FFFFFFFFFFFFFFFFFFFFFFFFFFFFFFFFFFFFFFFFFFFFFFFFFFFFFFFFFFFFFFFFFFFFFFFF  
@A00155:342:HHGFNDSXY:1:1420:31946:21621 1:N:0:GAACCTAG+TCCGCATA  
GAGAGGGATGTAGAGGGCGAGAGAGAGCGACTTCTCTCGGGCCCACAGCCTTACAGCTGTGGAGCACG

GTATCCTCTGCCGAAACAGAGGTTGGACAAGACCGGAGGGGTCTCCTAGTTCCAAAGGAGATGTACTC  
+  
FFFFFFFF:FFFF:FFFFFFFFFFFFFFFF,FFFFFFFFFFFFFFFFFFFFFFFF:FFFFFFFF  
FFFFFFFFFFFFFFFF:FFFFFFFFFFFFFFFFFFFFFFFFFFFFFFFFFFFFFFFFFFFFFFFF  
@A00155:342:HHGFNDSXY:1:1420:10773:28040 1:N:0:GAACCTAG+TCCGCATA  
TGTTTCGGCAGAGGATACCGTGCTCCACAGCTGTAAGGCTGTGGGCCCGAGAGAAGTCGCTCTCTCTC  
GCCCTTCACATCCCTCTCGGCATTGAGATGACCATAGGCCAGAGGTGAGTCCTTAAGTGGACACAGCT  
+  
FFFFFFFFFFFFFFFFFFFFFFFFFFFFFFFFFFFFFFFFFFFFFFFFFFFFFFFF:FFFFFFFFFFFF  
FFFFFFFFFFFFFFFFFFFFFFFFFFFFFFFFFFFFFFFFFFFFFFFFFFFFFFFFFFFFFFFFFFFF  
@A00155:342:HHGFNDSXY:1:1420:32190:28307 1:N:0:GAACCTAG+TCCGCATA  
CAATGCCGAGAGGGATGTGGAGGGCGAGAGAGAGCGACTTCTCTCGGGCCCACAGCCTTACAGCTGTG  
GAGCACGGTATCCTCTGCCGAAACAGAGGTTGGACAAGACCGGAGGGGTCTCCTAGTTCCAAAGGAGA  
+  
FFFFFFFFFFFFFFFFFFFFFFFFFFFFFFFFFFFFFFFFFFFFFFFFFFFFFFFFFFFFFFFFFFFF  
FFFFFFFF:FFFFFFFFFFFFFFFFFFFFFFFFFFFFFFFFFFFFFFFF:FFFFFFFFFFFF:FFFFFFFFFFFF  
@A00155:342:HHGFNDSXY:1:1420:20094:33004 1:N:0:GAACCTAG+TCCGCATA  
GCGACTTCTCTCGGGCCCACAGCCTTACAGCTGTGGAGCACGGTATCCTCTGCCGAAACAGAGGTTGG  
ACAAGACCGGAGGGGTCTCCTAGTTCCAAAGGAGATGTACTCCGGGCTTGTTACAGACCTACCGTGTA  
+  
FFFF:,FFFFFFFFFFFFFFFFFFFFFFFFFFFFFFFFFFFFFFFFFFFFFFFFFFFFFFFFFFFFFFFF  
FFFF:FFFFFFFFFFFFFFFFFFFFFFFFFFFFFFFFFFFFFFFF:FFF:FFFFFFFFFFFFFFFFFFFF  
@A00155:342:HHGFNDSXY:1:1421:27606:5431 1:N:0:GAACCTAG+TCCGCATA  
GGATGTGGAGGGCGAGAGAGAGCGACTTCTCTCGGGCCCACAGCCTTACAGCTGTGGAGCACGGTATC  
CTCTGCCGAAACAGAGGTTGGACAAGACCGGAGGGGTCTCCTAGTTCCAAAGGAGATGTACTCC  
+  
FFF:FFFFFFFFFFFF:FFFFFFFFFFFFFFFFFFFFFFFFFFFFFFFF, F:FFFFFFFF:FFFFFFFFFFFF  
FFFFFFFFFFFFFFFFFFFFFFFFFFFFFFFF, FFF:FF:FFFFFFFFFFFF:FFFFFF:FFFF:FF  
@A00155:342:HHGFNDSXY:1:1421:4164:7044 1:N:0:GAACCTAG+TCCGCATA  
GATGTGGAGGGCGAGAGAGAGCGACTTCTCTCGGGCCCACAGCCTTACAGCTGTGGAGCACGGTATCC  
TCTGCCGAAACAGAGGTTGGACAAGACCGGAGGGGTCTCCTAGTTCCAAAGGAGATGTACTCCGGGCT  
+  
FFFFFFFFFFFFFFFFFFFFFFFFFFFFFFFFFFFFFFFFFFFFFFFFFFFFFFFFFFFFFFFFFFFF  
FFFFFFFFFFFFFFFFFFFFFFFFFFFFFFFFFFFFFFFFFFFFFFFFFFFFFFFFFFFFFFFFFFFF  
@A00155:342:HHGFNDSXY:1:1422:5050:14090 1:N:0:GAACCTAG+TCCGCATA  
ATCTCAATGCCGAGAGGGATGTGGAGGGCGAGAGAGAGCGACTTCTCTCGGGCCCACAGCCTTACAGC  
TGTGGAGCACGGTATCCTCTGCCGAAACAGAGGTTGGACAAGACCGGAGGGGTCTCCTGGTTCCAAAG  
+  
FFFFFFFFFFFF:FFFFFFFFFFFFFFFFFFFFFFFFFFFFFFFFFFFFFFFFFFFFFFFFFFFFFFFF:FFFF  
FF:FFFFFFFF:FFFFFFFFFFFFFFFFFFFFFFFFFFFFFFFF:FFFFFFFFFFFFFFFFFFFFFFFFFFFF  
@A00155:342:HHGFNDSXY:1:1422:15826:34788 1:N:0:GAACCTAG+TCCGCATA  
GATGTGGAGGGCGAGAGAGAGCGACTTCTCTCGGGCCCACAGCCTTACAGCTGTGGAGCACGGTATCC  
TCTGCCGAAACAGAGGTTGGACAAGACCGGAGGGGTCTCCTAGTTCCAAAGGAGATGTACTCCGGGCT  
+  
FF:FFFFFFFFFFFFFFFFFFFFFFFFFFFFFFFFFFFFFFFFFFFFFFFFFFFFFFFFFFFFFFFFFFFF  
FFFFFFFFFFFFFFFFFFFFFFFFFFFFFFFFFFFFFFFFFFFFFFFF:FFFFFFFFFFFFFFFFFFFFFFFF  
@A00155:342:HHGFNDSXY:1:1422:23800:35603 1:N:0:GAACCTAG+TCCGCATA  
GAGGGCGAGAGAGAGCGACTTCTCTCGGGCCCACAGCCTTACAGCTGTGGAGCACGGTATCCTCTGCC  
GAAACAGAGGTTGGACAAGACCGGAGGGGTCTCCTAGTTCCAAAGGAGATGTACTCCGGGCTTGTTCA  
+  
FFFFFFFFFFFFFFFFFFFFFFFFFFFF:FFFFFFFFFFFFFFFFFFFFFFFFFFFFFFFFFFFFFFFFFFFF  
:FFFFFFFFFFFFFFFFFFFFFFFFFFFFFFFFFFFFFFFF:FFFFFFFFFFFFFFFFFFFFFFFFFFFF  
@A00155:342:HHGFNDSXY:1:1422:11749:35837 1:N:0:GAACCTAG+TCCGCATA  
ATCTCAATGCCGAGAGGGATGTGGAGGGCGAGAGAGAGCGACTTCTCTCGGGCCCACAGCCTTACAGC

TGTGGAGCACGGTATCCTCTGCCGAAACAGAGGTTGGAAAAGACCGGAGGGGTCTCCTAGTTCCA  
+  
FF::FFF:F,,FFF,,:FF,:F,F:::FF,F:FF:,,,FF:F,F,,F,:,:F:FFFFFF:FFFFFF  
:,,, :FFFF:,FFFFFF,FFF:F:FFF,:FF:,FFFF,FF,:,,,FFFFFFF,F:F:,FF,F  
@A00155:342:HHGFNDSXY:1:1423:3974:17581 1:N:0:GAACCTAG+TCCGCATA  
TTAAGGACTCTCCTCTGGCCTATGGTCATCTCAATGCCGAGAGGGATGTGGAGGGCGAGAGAGCGA  
CTTCTCTCGGGCCCACAGCCTTACAGCTGTGGAGCACGGTATCCTCTGCCGAAACAGAGGTTGGACAA  
+  
FFFFFFFFFFFFFFFFFFFFFFFFFFFFFFFFFFFFFFFFFFFFFFFFFFFFFFFFFFFFFFFFFFFFFFFFF:FFFFFFFFFFFFFFFFF  
FFFFFFFFFFFFFFFFFFFFFFFFFFFFFFFFFFFFFFFFFFFFFFFFFFFFFFFFFFFFFFFFFFFFFFFFF:FFFFFFFFFFFFFFFFF  
@A00155:342:HHGFNDSXY:1:1423:8341:27993 1:N:0:GAACCTAG+TCCGCATA  
CTTCTCTCGGGCCCACAGCCTTACAGCTGTGGAGCACGGTATCCTCTGCCGAAACAGAGGTTGGACAA  
GACCGGAGGGGTCTCCTGGTTCCAAAGGAGATGTACTCCGGGCTTGTTCACGACCTACCGTGTAAGTC  
+  
FFFFFFFFFFFFFFFFFFFFFFFFFFFFFFFFFFFFFFFFFFFFFFFFFFFFFFFFFFFFFFFFFFFFFFFFF  
FFFFFFFFFFFFFFFFFFFFFFFFFFFFFFFFFFFFFFFFFFFFFFFFFFFFFFFFFFFFFFFFFFFFFFFFF  
@A00155:342:HHGFNDSXY:1:1423:16658:35978 1:N:0:GAACCTAG+TCCGCATA  
TCCACTTAAGGACTCACCTCTGGCCTATGGTCATCTCAATGCCGAGAGGGATGTGAAGGGCGAGAGAG  
AGCGACTTCTCTCGGGCCCACAGCCTTACAGCTGTGGAGCACGGTATCCTCTGCCGAAACAGAGGTTG  
+  
FFFFFFFFFFFFFFFFFFFFFFFFFFFFFFFFFFFFFFFFFFFFFFFFFFFFFFFFFFFFFFFFFFFFFFFFF  
FFFFFFFFFFFFFFFFFFFFFFFFFFFFFFFFFFFFFFFFFFFFFFFFFFFFFFFFFFFFFFFFFFFFFFFFF  
@A00155:342:HHGFNDSXY:1:1425:5954:5384 1:N:0:GAACCTAG+TCCGCATA  
ATCTCTATGCCGAGAGGGATGTGGAGGGCGAGAGAGAGCGACTTCTCTCGGGCCCACAGCCTTACAGC  
TGTGGAGCACGGTATCCTCTGCCGAAACAGAGGTTGGACAAGACCGGAGGGGTCTCCTAGTTCCAAAG  
+  
FFFFFFFFFFFFFFF:FFFFFFFFFFFFFFFFFFFFFFFFFFFFFFFFFFFFFFFFFFFFFFFFFFFFFFFFF  
FFFFFFFFFFFFFFFFFFFFFFFFFFFFFFFFFFFFFFFFFFFFFFFFFFFFFFFFFFFFFFFFFFFFFFFFF:FFF  
@A00155:342:HHGFNDSXY:1:1425:5348:12477 1:N:0:GAACCTAG+TCCGCATA  
ATGCCGAGAGGGATGTGGAGGGCGAGAGAGAGCGACTTCTCTCGGGCCCACAGCCTTACAGCTGTGGA  
GCACGGTATCCTCTGCCGAAACAGAGGTTGGACAAGACCGGAGGGGTCTCCTAGTTCCAAAGGAGAT  
+  
FFFFFFFFFFFFFFFFFFFFFFFFFFFFFFFFFFFFFFFFFFFFFFFFFFFFFFFFFFFFFFFFFFFFFFFFF  
FFFFFFFFFFFFFFFFFFFFFFFFFFFFFFFFFFFFFFFFFFFFFFFFFFFFFFFFFFFFFFFFFFFFFFFFF  
@A00155:342:HHGFNDSXY:1:1425:28393:29653 1:N:0:GAACCTAG+TCCGCATA  
AGATCAGCTGTGTCCACTTAAGGACTCACCTCTGGCCTATGGTCATCTCAATGCCGAGAGGGATGTGA  
AGGGCGAGAGAGAGCGACTTCTCTCGGGCCCACAGCCTTACAGCTGTGGAGCACGGTATCCTCTGCCG  
+  
FFFFFFFFFFFFFFFFFFFFFFFFFFFFFFFFFFFFFFFFFFFFFFFFFFFFFFFFFFFFFFFFFFFFFFFFF,FFFFFFFFF:FFFFFFFFFFFFFFFFF  
FFFFFFFFFFFFFFFFFFFFFFFFFFFFFFFFFFFFFFFFFFFFFFFFFFFFFFFFFFFFFFFFFFFFFFFFF:FFFFFFFFFFFFFFFFF  
@A00155:342:HHGFNDSXY:1:1425:24930:33552 1:N:0:GAACCTAG+TCCGCATA  
GGATGTAGAGGGCGAGAGAGAGCGACTTCTCTCGGGCCCACAGCCTTACAGCTGTGGAGCACGGTATC  
CTCTGCCGAAACAGAGGTTGGACAAGACCGGAGGGGTCTCCTAGTTCCAAAGGAGATGTACTCC  
+  
FFFFF,FFFFFFFFFFFFFFFFFFFFFFFFFFFFFFFFFFFFFFFFFFFFFFFFFFFFFFFFFFFFFFFFF:FFFFFFFFFFFFFFFFF  
FFFFFFFFFFFFFFFFFFFFFFFFFFFFFFFFFFFFFFFFFFFFFFFFFFFFFFFFFFFFFFFFFFFFFFFFF  
@A00155:342:HHGFNDSXY:1:1426:16920:21057 1:N:0:GAACCTAG+TCCGCATA  
ACCTCTGTTTCGGCAGAGGATACCGTGCTCCACAGCTGTAAGGCTGTGGGGCCGAGAGAAGTCGCTCT  
CTCTCGCCCTCCACATCCCTCTCGGCATTGAGATGACCATAGGCCAGAGGAGTCTTAAGTGGACA  
+  
FFFFFFFFFFFFFFFFFFFFFFFFFFFFFFFFFFFFFFFFFFFFFFFFFFFFFFFFFFFFFFFFFFFFFFFFF:FFFFFFFFFFF  
FFFFFFF:FFFFFFFFFFFFFFFFFFFFFFFFFFFFFFFFFFFFFFFFFFFFFFFFFFFFFFFFFFFFFFFFF:  
@A00155:342:HHGFNDSXY:1:1426:7771:29951 1:N:0:GAACCTAG+TCCGCATA  
GAGCGACTTCTCTCGGGCCCACAGCCTTACAGCTGTGGAGCACGGTATCCTCTGCCGAAACAGAGGTT

GGACAAGACCGGAGGGGTCTCCTAGTTCCAAAGGAGATGTACTCCGGGCTTGTTACGACCTACCGTG  
+  
F:FFFFFFFFFFFFFFFF:FFF:FFFFFFFFFFFFFFFFFFFFFFFFFFFFFFFFFFFFFFFFFFFFFFFFF  
FFFFFFFFFFFFFFFFFFFFFFFFFFFFFFFFFFFFFFFFFFFFFFFFFFFFFFFFFFFFFFFFFFFFFFFFF:FFFFF  
@A00155:342:HHGFNDSXY:1:1426:8133:30483 1:N:0:GAACCTAG+TCCGCATA  
TGCCCCGCCACACCGCCTTAGATCAGCTGTGTCCACTTAAGGACTCACCTCTGGCCTATGGTCATCTC  
AATGCCGAGAGGGATGTGGAGGGCGAGAGAGAGCGACTTCTCTCGGGCCACAGCCTTACAGCTGTGG  
+  
FFFFFFFFFFFFFFFFFFFFFFFFFFFFFFFFFFFFFFFFFFFFFFFFFFFFFFFFFFFFFFFFFFFFFFFFF  
FFFFFFFFFFFFFFFFFFFFFFFFFFFFFFFFFFFFFFFFFFFFFFFFFFFFFFFFFFFFFFFFFFFFFFFFF  
@A00155:342:HHGFNDSXY:1:1426:28438:31203 1:N:0:GAACCTAG+TCCGCATA  
AAGGACTCACCTCTGGCCTATGGTCATCTCAATGCCGAGAGGGATGTGGAGGGCGAGAGAGAGCGACT  
TCTCTCGGGCCACAGCCTTACAGCTGTGGAGCACGGTATCCTCTGCCGAAACAGAGGTTGGAC  
+  
FFFFFFFFFFFFFFFFFFFFFFFFFFFFFFFFFFFFFFFFFFFFFFFFFFFFFFFFFFFFFFFFFFFFFFFFF  
FFFFFFFFFFFFFFFFFFFFFFFFFFFFFFFFFFFFFFFFFFFFFFFFFFFFFFFFFFFFFFFFFFFFFFFFF  
@A00155:342:HHGFNDSXY:1:1428:11324:8672 1:N:0:GAACCTAG+TCCGCATA  
CCACCACACCGCCTTAGATCAGCTGTGTCCACTTAAGGACTCACCTCTGGCCTATGGTCATCTCAATG  
CCGAGAGGGATGTGGAGGGCGAGAGAGAGCGACTTCTCTCGGGCCACAGCCTTACAGCTGTGGAGCA  
+  
FFFFFFFFFFFFFFFFFFFFFFFFFFFFFFFFFFFFFFFFFFFFFFFFFFFFFFFFFFFFFFFFFFFFFFFFF  
FFFFFFFFF:FFFFFFFFFFFFFFFFFFFFFFFFFFFFFFFFFFFFFFFFFFFFFFFFFFFFFFFFFFFFFFFFF  
@A00155:342:HHGFNDSXY:1:1428:30156:13823 1:N:0:GAACCTAG+TCCGCATA  
TCCTCTGCCGAAACAGAGGTTGGACAAGACCGGAGGGGTCTCCTGGTTCCAAAGGAGATGTACTCCGG  
GCTTGTTACGACCTACCGTGTAAGTCGTAGTCTAGTAGGCTACCTGACGAGTCCTTTTTAGGACGAA  
+  
FFFFFFFFFFFFFFFFFFFFFFFFFFFFFFFFFFFFFFFFFFFFFFFFFFFFFFFFFFFFFFFFFFFFFFFFF  
FFFFFFFFFFFFFFFFFFFFFFFFFFFFFFFFFFFFFFFFFFFFFFFFFFFFFFFFFFFFFFFFFFFFFFFFF,F:FFFFFFF  
@A00155:342:HHGFNDSXY:1:1429:9227:16094 1:N:0:GAACCTAG+TCCGCATA  
TTACAGCTGTGGAGCACGGTATCCTCTGCCGAAACAGAGGTTGGACAAGACCGGAGGGGTCTCCTAGT  
TCCAAAGGAGATGTACTCCGGGCTTGTTACGACCTACCGTGTAAGTCGTAGTCTAGTAGGCTAC  
+  
FFFFFFFFFFFFFFFFFFFFFFFFFFFFFFFFFFFFFFFFFFFFFFFFFFFFFFFFFFFFFFFFFFFFFFFFF  
FFFFFFFFFFFFFFFFFFFFFFFFFFFFFFFFFFFFFFFFFFFFFFFFFFFFFFFFFFFFFFFFFFFFFFFFF  
@A00155:342:HHGFNDSXY:1:1429:3938:23907 1:N:0:GAACCTAG+TCCGCATA  
CGACTTCTCTCGGGCCACAGCCTTACAGCTGTGGAGCACGGTATCCTCTGCCGAAACAGAGGTTGGA  
CAAGACCGGAGGGGTCTCCTAGTTCCAAAGGAGATGTACTCCGGGCTTGTTACGACCTACCGTGTA  
+  
FFFFFFFFFFFFFFFFFFFFFFFFFFFFFFFFFFFFFFFFFFFFFFFFFFFFFFFFFFFFFFFFFFFFFFFFF  
FFFFFFFFFFFFFFFFFFFFFFFFFFFFFFFFFFFFFFFFFFFFFFFFFFFFFFFFFFFFFFFFFFFFFFFFF  
@A00155:342:HHGFNDSXY:1:1429:31078:26256 1:N:0:GAACCTAG+TCCGCATA  
ACTTAAGGACTCACCTCTGGCCTATGGTCATCTCAATGCCGAGAGGGATGTGGAGGGCGAGAGAGAGC  
GACTTCTCTCGGGCCACAGCCTTACAGCTGTGGAGCACGGTATCCTCTGCCGAAACAGAGGTTGGAC  
+  
FFFFFFFFFFFFFFFFFFFFFFFFFFFFFFFFFFFFFFFFFFFFFFFFFFFFFFFFFFFFFFFFFFFFFFFFF  
FFFFFFFFFFFFFFFFFFFFFFFFFFFFFFFFFFFFFFFFFFFFFFFFFFFFFFFFFFFFFFFFFFFFFFFFF  
@A00155:342:HHGFNDSXY:1:1429:16233:28855 1:N:0:GAACCTAG+TCCGCATA  
TGCCCCGCCACACCGCCTTAGATCAGCTGTGTCCACTTAAGGACTCACCTCTGGCCTATGGTCATCTC  
AATGCCGAGAGGGATGTGGAGGGCGAGAGAGAGCGACTTCTCTCGGGCCACAGCCTTACAGCTGTGG  
+  
:FFFFFFF:FFFFFFFFFFFFFFFF:FFFFFFFFF:F,:FFFFFFF:FFFFF,FFFFF:FFFFFFFFFFFF  
:FFF,:F,FFFFFF,: ,FFFFFFFFF,FFF:FFFFF,FFFFFFFFFFFFFFFFFFFFFFFFFFFFF  
@A00155:342:HHGFNDSXY:1:1430:13901:21026 1:N:0:GAACCTAG+TCCGCATA  
AGCGACTTCTCTCGGGCCACAGCCTTACAGCTGTGGAGCACGGTATCCTCTGCCGAAACAGAGGTTG

GACAAGACCGGAGGGGTCTCCTAGTTCCAAAGGAGATGTACTCCGGGCTTGTTACGACCTACCGTGT  
+  
FFFFFFFFFFFFFF:FFFF,FFFFFFFF::FFFFFFFF,FF::FFFFFF:FFFFFF:F,,FF:FFFFFF:FFFFFF,  
,FFFF:F:F:F,F,:FFFFFFFFFFFF:FF,FFF:FFFF:FFFFFF:F::,,::,,FFFFFFFF:F:FF,:  
@A00155:342:HHGFNDSXY:1:1430:21694:28510 1:N:0:GAACCTAG+TCCGCATA  
TTAAGGACTCTCCTCTGGCCTATGGTCATCTCAATGCCGAGAGGGATGTGGAGGGCGAGAGAGAGCGA  
CTTCTCTCGGGCCACAGCCTTACAGCTGTGGAGCACGGTATCCTCTGCCGAAACAGAGGTTGGACAA  
+  
FFFFFFFFFFFFFFFFFFFFFFFFFFFFFFFFFFFFFFFFFFFFFFFFFFFFFFFFFFFFFFFFFFFFFFFFFFFFFFFF  
FFFFFFFFFFFFFFFFFFFFFFFFFFFFFFFFFFFFFFFFFFFFFFFFFFFFFFFFFFFFFFFFFFFFFFFFFFFFFFFF  
@A00155:342:HHGFNDSXY:1:1430:2609:29716 1:N:0:GAACCTAG+TCCGCATA  
GGTATCCTCTGCCGAAACAGAGGTTGGACAAGACCGGAGGGGTCTCCTAGTTCCAAAGGAGATGTACT  
CCGGGCTTGTTACGACCTACCGTGTAAAGTCGTAGTCTAGTAGGCTACCTGACGAGTCCTTTTATAGGA  
+  
FFFFFFFFFFFFFFFFFFFFFFFFFFFFFFFFFFFFFFFFFFFFFFFFFFFFFFFFFFFFFFFFFFFFFFFFFFFFFFFF  
FFFFFFFFFFFFFFFFFFFFFFFFFFFFFFFFFFFFFFFFFFFFFFFFFFFFFFFFFFFFFFFFFFFFFFFFFFFFFFFF  
@A00155:342:HHGFNDSXY:1:1430:20907:35728 1:N:0:GAACCTAG+TCCGCATA  
GAGAGAGCGACTTCTCTCGGGCCACAGCCTTACAGCTGTGGAGCACGGTATCCTCTGCCGAAACAGA  
GGTTGGACAAGACCGGAGGGGTCTCCTAGTTCCAAAGGAGATGTACTCCGGGCTTGTTACGACCTAC  
+  
FFFFFFF,FFFF:FFF:FFF:FFFFFF::F:FF:F:FFFFFFF::FF::FFFFFFFFFFFFFFFFFFFFFFF  
FFFFFF:FFFFFFFF,FFF:F:FFFF:FFFF:FFFF,FFFF:FFFF:FFFF:FFFFFFFF:FFFFFF  
@A00155:342:HHGFNDSXY:1:1431:29821:10927 1:N:0:GAACCTAG+TCCGCATA  
TGTGGAGGGCGAGAGAGAGCGACTTCTCTCGGGCCACAGCCTTACAGCTGTGGAGCACGGTATCCTC  
TGCCGAAACAGAGGTTGGACAAGACCGGAGGGGTCTCCTAGTTCCAAAGGAGATGTACTCCGGG  
+  
:F:FFFFFFFFFFFFFFFFFFFFFFFFFFFFFFFFFFFFFFFFFFFFFFFFFFFFFFFFFFFFFFFFFFFFFFFFFFFF  
FFFFFFFFFFFFFFFFFFFFFFFFFFFFFFFFFFFFFFFFFFFFFFFFFFFFFFFFFFFFFFFFFFFFFFFFFFFFFFFF  
@A00155:342:HHGFNDSXY:1:1431:32994:18270 1:N:0:GAACCTAG+TCCGCATA  
AGCGACTTCTCTCGGGCCACAGCCTTACAGCTGTGGAGCACGGTATCCTCTGCCGAAACAGAGGTTG  
GACAAGACCGGAGGGGTCTCCTAGTTCCAAAGGAGATGTACTCCGGGCTTGTTACGACCTACCGTGT  
+  
FFFF:FFFFFFFFFFFFFFFF,FFFFFFFFFFFFFFFFFFFFFFFFFFFFFFFFFFFFFFFFFFFFFFFFFFFFFFF  
FFFFFFFFFFFFFFFFFFFFFFFFFFFFFFFFFFFFFFFFFFFFFFFFFFFFFFFFFFFFFFFFFFFFFFFFFFFFFFF  
@A00155:342:HHGFNDSXY:1:1431:29767:20196 1:N:0:GAACCTAG+TCCGCATA  
CCTTACAGCTGTGGAGCACGGTATCCTCTGCCGAAACAGAGGTTGGACAAGACCGGAGGGGTCTCCTG  
GTTCCAAAGGAGATGTACTCCGGGCTTGTTACGACCTACCGTGTAAAGTCGTAGTCTAGTAGGCTACC  
+  
FFFFFFFFFFFFFFFFFFFFFFFFFFFFFFFFFFFFFFFFFFFFFFFFFFFFFFFFFFFFFFFFFFFFFFFFFFFFFFF  
FFFFFFFFFFFFFFFFFFFFFFFFFFFFFFFFFFFFFFFFFFFFFFFFFFFFFFFFFFFFFFFFFFFFFFFFFFFFFFF  
@A00155:342:HHGFNDSXY:1:1431:17716:20369 1:N:0:GAACCTAG+TCCGCATA  
CTTCTCTCGGGCCACAGCCTTACAGCTGTGGAGCACGGTATCCTCTGCCGAAACAGAGGTTGGACAA  
GACCGGAGGGGTCTCCTAGTTCCAAAGGAGATGTACTCCGGGCTTGTTACGACCTACCGTGTAAAGTC  
+  
FFFFFFFFFFFFFFFFFFFFFFFFFFFFFFFFFFFFFFFFFFFFFFFFFFFFFFFFFFFFFFFFFFFFFFFFFFFFFFF  
FFFFFFFFFFFFFFFFFFFFFFFFFFFFFFFFFFFFFFFFFFFFFFFFFFFFFFFFFFFFFFFFFFFFFFFFFFFFFFF  
@A00155:342:HHGFNDSXY:1:1431:18213:24956 1:N:0:GAACCTAG+TCCGCATA  
CTTCTCTCGGGCCACAGCCTTACAGCTGTGGAGCACGGTATCCTCTGCCGAAACAGAGGTTGGACAA  
GACCGGAGGGGTCTCCTAGTTCCAAAGGAGATGTACTCCGGGCTTGTTACGACCTACCGTGTAAAGTC  
+  
FFFFFFFFFFFFFFFFFFFFFFFFFFFFFFFFFFFFFFFFFFFFFFFFFFFFFFFFFFFFFFFFFFFFFFFFFFFFFFF  
FFFFFFFFFFFFFFFFFFFFFFFFFFFFFFFFFFFFFFFFFFFFFFFFFFFFFFFFFFFFFFFFFFFFFFFFFFFFFFF  
@A00155:342:HHGFNDSXY:1:1431:17029:28009 1:N:0:GAACCTAG+TCCGCATA  
TTAAGGACTCACCTCTGGCCTATGGTCATCTCAATGCCGAGAGGGATGTGAAGGGCGAGAGAGAGCGA

TTCTCTCGGGCCACAGCCTTACAGCTGTGGAGCACGGTATCCTCTGCCGAAACAGAGGTTGGACAA  
+  
FFFFFFFFFFFFFFFFFFFFFFFFFFFFFFFFFFFFFFFFFFFFFFFFFFFFFFFFFFFFFFFFFFFFF, FFFFFFFFFFFFFFFFFFFFFFFF  
FFFFFFFFFFFFFFFFFFFFFFFFFFFFFFFFFFFFFFFFFFFFFFFFFFFFFFFFFFFFFFFFFFFFFFFFF  
@A00155:342:HHGFNDSXY:1:1432:30219:6793 1:N:0:GAACCTAG+TCCGCATA  
CAATGCCGAGAGGGATGTGGAGGGCGAGAGAGAGCGACTTCTCTCGGGCCCACAGCCTTACAGCTGTG  
GAGCACGGTATCCTCTGCCGAAACAGAGGTTGGACAAGACCGGAGGGGTCTCCTAGTTCAAAGGAGA  
+  
FFFFFFFFFFFFFFFFFFFFFFFFFFFFFFFFFFFFFFFFFFFFFFFFFFFFFFFFFFFFFFFFFFFFFFFFF: FFFFFFFFFFFFFFFFFFFFFFFF  
FFFFFFFFFFFFFFFFFFFFFFFFFFFFFFFFFFFFFFFFFFFFFFFFFFFFFFFFFFFFFFFFFFFFFFFFF  
@A00155:342:HHGFNDSXY:1:1432:19904:22467 1:N:0:GAACCTAG+TCCGCATA  
TCTCTCTCGGGCCCACAGCCTTACAGCTGTGGAGCACGGTATCCTCTGCCGAAACAGAGGTTGGACAAG  
ACCGGAGGGGTCTCCTAGTTCAAAGGAGATGTACTCCGGGCTTGTTACGACCTACCGTGTAAGTCG  
+  
FFFFFFFFFFFFFFFFFFFFFFFFFFFFFFFFFFFFFFFFFFFFFFFFFFFFFFFFFFFFFFFFFFFFFFFFF: FFFFFFFFFFFFFFFF  
FFFFFFFFFFFFFFFFFFFFFFFFFFFFFFFFFFFFFFFFFFFFFFFFFFFFFFFFFFFFFFFFFFFFFFFFF: FFFFFFFFFFFFFFFFFFFFFFFF  
@A00155:342:HHGFNDSXY:1:1433:9028:8234 1:N:0:GAACCTAG+TCCGCATA  
GGCCTATGGTCATCTCAATGCCGAGAGGGATGTGGAGGGCGAGAGAGGGCGACTTCTCTCGGGCCCAC  
AGCCTTACAGCTGTGGAGCACGGTATCCTCTGCCGAAACAGAGGTTGGACAAGACCGGAGGGGTCTCC  
+  
FFFFFFFFFFFFFFFFFFFFFFFFFFFFFFFFFFFFFFFFFFFFFFFFFFFFFFFFFFFFFFFFFFFFFFFFF  
FFFFFFFFFFFFFFFFFFFFFFFFFFFFFFFFFFFFFFFFFFFFFFFFFFFFFFFFFFFFFFFFFFFFFFFFF: FFFFFFFFFFFFFFFFFFFFFFFF  
@A00155:342:HHGFNDSXY:1:1433:27670:14121 1:N:0:GAACCTAG+TCCGCATA  
GTATCCTCTGCCGAAACAGAGGTTGGACAAGACCGGAGGGGTCTCCTGGTTCAAAGGAGATGTACTC  
CGGGCTTGTTACGACCTACCGTGTAAGTCGTAGTCTAGTAGGCTACCTGACGAGTCCTTTTTAGGAC  
+  
FFFFFFFFFFFFFFFFFFFFFFFFFFFFFFFFFFFFFFFFFFFFFFFFFFFFFFFFFFFFFFFFFFFFFFFFF  
FFFFFFFFFFFFFFFFFFFFFFFFFFFFFFFFFFFFFFFFFFFFFFFFFFFFFFFFFFFFFFFFFFFFFFFFF: FFF  
@A00155:342:HHGFNDSXY:1:1433:29161:26443 1:N:0:GAACCTAG+TCCGCATA  
CTCTGGCCTATGGTCATCTCAATGCCGAGAGGGATGTGAAGGGCGAGAGAGAGCGACTTCTCTCGGGC  
CCACAGCCTTACAGCTGTGGAGCACGGTATCCTCTGCCGAAACAGAGGTTGGACAAGACCGGAGGGGT  
+  
FFFF: FFFFFF: FF, FFFFFFFFF: F, FF: FFFF, : F:: FFF:, FFFFFFFFF: FF, : FFFFFFFFFF  
FFFFFFFF, FFFFFFFFF: FFFF: : FFFFF, , FFFFFFFFF: FFFF: , FFFFFFFFF: : FFFFF  
@A00155:342:HHGFNDSXY:1:1433:5638:27696 1:N:0:GAACCTAG+TCCGCATA  
GTCCAACCTCTGTTTCGGCAGAGGATACCGTGCTCCACAGCTGTAAGGCTGTGGGCCCCGAGAGAAGTC  
GCTCTCTCTCGCCCTTCACATCCCTCTCGGCATTGAGATGACCATAGGCCAGAGGTGAGTCCTTAAGT  
+  
FFFFFFFFFFFFFFFFFFFFFFFFFFFFFFFFFFFFFFFFFFFFFFFFFFFFFFFFFFFFFFFFFFFFFFFFF: FFFFFFFFFFFFFFFFFFFFFFFF  
FFFFFFFFFFFFFFFFFFFFFFFFFFFFFFFFFFFFFFFFFFFFFFFFFFFFFFFFFFFFFFFFFFFFFFFFF, FFFFFFFFFFFFFFFFFFFFFFFF  
@A00155:342:HHGFNDSXY:1:1433:7554:32017 1:N:0:GAACCTAG+TCCGCATA  
CGACTTCTCTCGGGCCCACAGCCTTACAGCTGTGGAGCACGGTATCCTCTGCCGAAACAGAGGTTGGA  
CAAGACCGGAGGGGTCTCCTAGTTCAAAGGAGATGTACTCCGGGCTTGTTACGACCTACCGTGTA  
+  
FFFFF: : FFFFFFFFFFFFFFFFFF: FFFFFFFFFF: FF, FFFF: : FFF, FF: : FFFF, FFFF: FFF: F: FF  
FFFFFFFF: F: FFFFFFFFF, FFFFFFFFFF: FFF: FFF, F, FFFF, FFFFFFFFF: FFFF: : F: FF  
@A00155:342:HHGFNDSXY:1:1433:22336:35477 1:N:0:GAACCTAG+TCCGCATA  
GGCATTGAGATGACCATAGGCCAGAGGTGAGTCCTTAAGTGGACACAGCTGATCTAAGGCGGTGTGGC  
GGGGCATGGGTTTGAACCCCATGACGGTCGGAGTCTAGTAGGCTCCCTGATGAGTCCGTTCCAAGGA  
+  
FFFFFFFFFFFFFFFFFFFFFFFFFFFFFFFFFFFFFFFFFFFFFFFFFFFFFFFFFFFFFFFFFFFFFFFFF  
FFFFFFFFFFFFFFFFFFFFFFFFFFFFFFFFFFFFFFFFFFFFFFFFFFFFFFFFFFFFFFFFFFFFFFFFF  
@A00155:342:HHGFNDSXY:1:1433:22625:35603 1:N:0:GAACCTAG+TCCGCATA  
GGCATTGAGATGACCATAGGCCAGAGGTGAGTCCTTAAGTGGACACAGCTGATCTAAGGCGGTGTGGC

GGGGCATGGGTTTGAACCCCATGACGGTCGGAGTCTAGTAGGCTCCCTGATGAGTCCGTTC AAGGA  
+  
FFFF,FFFFFFFFFFFFFFFFFFFFFFFFFFFFFFFFFFFFFFFFFFFFFFFFFFFFFFFFFFFFFFF:FFFFFFFFFFFFFFFFFFFFFFFFFFFFFFFFF  
FFFFFFFFFFFFFFFFFFFFFFFFFFFFFFFFFFFFFFFFFFFFFFFFFFFFFFFFFFFFFFFFFFFFFFFFF  
@A00155:342:HHGFNDSXY:1:1434:16089:13573 1:N:0:GAACCTAG+TCCGCATA  
GTCATCTCAATGCCGAGAGGGATGTGGAGGGCGAGAGAGAGCGACTTCTCTCGGGCCCACAGCCTTAC  
AGCTGTGGAGCACGGTATCCTCTGCCGAAACAGAGGTTTGACAAGACCGGAGGGGTCTCCTAGTTCCA  
+  
FFFFFFFFFFFFFFFFF:FFFFFFF:FFFFFFFFFFFFFFFFFFFFFFFFFFFFFFFFFFFFFFFFFFFFF  
FFFFFFFFFFFFFFFFFFFFFFFFFFFFFFFFFFFFFFFFFFFFFFFFFFFFFFFFFFFFFFFFFFFFFFFFF  
@A00155:342:HHGFNDSXY:1:1434:13449:31454 1:N:0:GAACCTAG+TCCGCATA  
GAGCGACTTCTCTCGGGCCCCACAGCCTTACAGCTGTGGAGCACGGTATCCTCTGCCGAAACAGAGGTT  
GGACAAGACCGGAGGGGTCTCCTAGTTCAAAGGAGATGTACTCCGGGCTTGTTACGACCTACCGTG  
+  
FFFFFFFFFFFFFFFFFFFFFFFFFFFFFFFFFFFFFFFFFFFFFFFFFFFFFFFFFFFFFFFFFFFFFFFFF  
FFFFFFFFFFFFFFFFFFFFFFFFFFFFFFFFFFFFFFFFFFFFFFFFFFFFFFFFFFFFFFFFFFFFFFFFF  
@A00155:342:HHGFNDSXY:1:1434:22607:31751 1:N:0:GAACCTAG+TCCGCATA  
TGTTTTCGGCAGAGGATACCGTGCTCCACAGCTGTAAGGCTGTGGGCCCCGAGAGAAGTCGCTCTCTCTC  
GCCCTCCACATCCCTCTCGGCATTGAGATGACCATAGGCCAGAGGTGAGTCCTTAAGTGGACACAGCT  
+  
FFFFFFFFFFFFFFFFFFFFFFFFFFFFFFFFFFFFFFFFFFFFFFFFFFFFFFFFFFFFFFFFFFFFFFFFF  
FFFFFFFFFFFFFFFFFFFFFFFFFFFFFFFFFFFFFFFFFFFFFFFFFFFFFFFFFFFFFFFFFFFFFFFFF  
@A00155:342:HHGFNDSXY:1:1435:3396:3521 1:N:0:GAACCTAG+TCCGCATA  
GTATCCTCTGCCGAAACAGAGGTTTGACAAGACCGGAGGGGTCTCCTAGTTCAAAGGAGATGTACTC  
CGGGCTTGTTACGACCTACCGTGTAAGTCGTAGTCTAGTAGGCTACCTGACGAGTCCATTTAG  
+  
FFFFFFFFFFFFFFFFFFFFFFFFFFFFFFFFFFFFFFFFFFFFFFFFFFFFFFFFFFFFFFFFFFFFFFFFF  
FFFFFFFFFFFFFFFFFFFFFFFFFFFFFFFFFFFFFFFFFFFFFFFFFFFFFFFFFFFFFFFFFFFFFFFFF  
@A00155:342:HHGFNDSXY:1:1436:29767:2033 1:N:0:GAACCTAG+TCCGCATA  
ACTTCTCTCGGGCCCACAGCCTTACAGCTGTGGAGCACGGTATCCTCTGCCGAAACAGAGGTTTGACA  
AGACCGGAGGGGTCTCCTAGTTCAAAGGAGATGTACTCCGGGCTTGTTACGACCTACCGTGTAAGT  
+  
FFFFFFFFFFFFFFFFFFFFFFFFFFFFFFFFFFFFFFFFFFFFFFFFFFFFFFFFFFFFFFFFFFFFFFFFF  
FFFFFFFFFFFFFFFFFFFFFFFFFFFFFFFFFFFFFFFFFFFFFFFFFFFFFFFFFFFFFFFFFFFFFFFFF  
@A00155:342:HHGFNDSXY:1:1436:6876:15687 1:N:0:GAACCTAG+TCCGCATA  
GAGCGACTTCTCTCGGGCCCACAGCCTTACAGCTGTGGAGCACGGTATCCTCTGCCGAAACAGAGGTT  
GGACAAGACCGGAGGGGTCTCCTGGTTCAAAGGAGATGTACTCCGGGCTTGTTACGACCTACCGTG  
+  
FFFFFFFFFFFFFFFFFFFFFFFFFFFFFFFFFFFFFFFFFFFFFFFFFFFFFFFFFFFFFFFFFFFFFFFFF  
FFFFFFFFFFFFFFFFFFFFFFFFFFFFFFFFFFFFFFFFFFFFFFFFFFFFFFFFFFFFFFFFFFFFFFFFF  
@A00155:342:HHGFNDSXY:1:1436:7392:17863 1:N:0:GAACCTAG+TCCGCATA  
ATCTCAATGCCGAGAGGGATGTGGAGGGCGAGAGAGAGCGACTTCTCTCGGGCCCACAGCCTTACAGC  
TGTGGAGCACGGTATCCTCTGCCGAAACAGAGGTTTGACAAGACCGGAGGGGTCTCCTGGTTCAAAG  
+  
FFFFFFFFFFFFFFFFFFFFFFFFFFFFFFFFFFFFFFFFFFFFFFFFFFFFFFFFFFFFFFFFFFFFFFFFF  
FFFFFFFFFFFFFFFFFFFFFFFFFFFFFFFFFFFFFFFFFFFFFFFFFFFFFFFFFFFFFFFFFFFFFFFFF  
@A00155:342:HHGFNDSXY:1:1436:17273:18787 1:N:0:GAACCTAG+TCCGCATA  
CTCAATGCCGAGAGGGATGTGGAGGGCGAGAGAGAGCGACTTCTCTTGGGCCCACAGCCTTACAGCTG  
TGGAGCACGGTATCCTCTGCCGAAACAGAGGTTTGACAAGACCGGAGGGGTCTCCTAGTTCAAAGGA  
+  
FFFFFFFFFFFFFFFFFFFFFFFFFFFFFFFFFFFFFFFFFFFFFFFFFFFFFFFFFFFFFFFFFFFFFFFFF  
FFFFFFFFFFFFFFFFFFFFFFFFFFFFFFFFFFFFFFFFFFFFFFFFFFFFFFFFFFFFFFFFFFFFFFFFF  
@A00155:342:HHGFNDSXY:1:1436:10167:25614 1:N:0:GAACCTAG+TCCGCATA  
GAGCGACTTCTCTCGGGCCCACAGCCTTACAGCTGTGGAGCACGGTATCCTCTGCCGAAACAGAGGTT

GGACAAGACCGGAGGGGTCTCCTAGTTCCAAAGGAGATGTACTCCGGGCTTGTTACGACCTACCGTG  
+  
FFFFFFFFFFFFFFFFFFFFFFFFFFFFFFFFFFFFFFFFFFFFFFFFFFFFFFFFFFFFFFFFFFFFFFFF:FF  
FFFFFFFFFFFFFFFFFFFFFFFFFFFFFFFFFFFFFFFFFFFFFFFFFFFFFFFFFFFFFFFFFFFFFFFF  
@A00155:342:HHGFNDSXY:1:1437:25979:12571 1:N:0:GAACCTAG+TCCGCATA  
GGACTCTCCTCTGGCCTATGGTCATCTCAATGCCGAGAGGGATGTGGAGGGCGAGAGAGAGCGACTTC  
TCTCGGGCCACAGCCTTACAGCTGTGGAGCACGGTATCCTCTGCCGAAACAGAGGTTGGACAAGACC  
+  
FFFFFFFFFFFFFFFFFFFFFFFFFFFFFFFFFFFFFFFFFFFFFFFFFFFFFFFFFFFFFFFFFFFFFFFF:FFFFFFFFFFFFFFFFFFFFFFFFFFFFFFFF  
FFFFFFFFFFFFFFFFFFFFFFFFFFFFFFFFFFFFFFFFFFFFFFFFFFFFFFFFFFFFFFFFFFFFFFFF  
@A00155:342:HHGFNDSXY:1:1437:30174:22842 1:N:0:GAACCTAG+TCCGCATA  
TGTAGAGGGCGAGAGAGAGCGACTTCTCTCGGGCCACAGCCTTACAGCTGTGGAGCACGGTATCCTC  
TGCCGAAACAGAGGTTGGACAAGACCGGAGGGGTCTCCTAGTTCCAAAGGAGATGTACTCCGGGCTTG  
+  
FFFFFFFFFFFFFFFFFFFFFFFFFFFFFFFFFFFFFFFFFFFFFFFFFFFFFFFFFFFFFFFFFFFFFFFF:FFFFFFFFFFFFFFFFFFFFFFFFFFFFFFFF  
FFFFFFFFFFFFFFFFFFFFFFFFFFFFFFFFFFFFFFFFFFFFFFFFFFFFFFFFFFFFFFFFFFFFFFFF,FFFFFFFFFFFFFFFFFFFFFFFFFFFFFFFF  
@A00155:342:HHGFNDSXY:1:1438:31159:13432 1:N:0:GAACCTAG+TCCGCATA  
CCTTACAGCTGTGGAGCACGGTATCCTCTGCCGAAACAGAGGTTGGACAAGACCGGAGGGGTCTCCTG  
GTTCCAAAGGAGATGTACTCCGGGCTTGTTACGACCTACCGTGTAAGTCGTAGTCTAGTAGGCTACC  
+  
FFFF:FFFFFFFFFFFFFFFFFFFFFFFFFFFFFFFFFFFFFFFFFFFFFFFFFFFFFFFFFFFFFFFF:FF:FFFFFFFFFFFFFFFFFFFFFFFF  
FFFFFFFFFFFFFFFFFFFFFFFFFFFFFFFFFFFFFFFFFFFFFFFFFFFFFFFFFFFFFFFFFFFFFFFF,FFFFFFFFFFFFFFFFFFFFFFFFFFFFFFFF  
@A00155:342:HHGFNDSXY:1:1438:9598:14199 1:N:0:GAACCTAG+TCCGCATA  
TCCACTTAAGGACTCACCTCTGGCCTATGGTCATCTCAATGCCGAGAGGGATGTAGAGGGCGAGAGAG  
AGCGACTTCTCTCGGGCCACAGCCTTACAGCTGTGGAGCACGGTATCCTCTGCCGAAACAGAGGTTG  
+  
FFFFFFFFFFFFFFFFFFFFFFFFFFFFFFFFFFFFFFFFFFFFFFFFFFFFFFFFFFFFFFFFFFFFFFFF  
FFFFFFFFFFFFFFFFFFFFFFFFFFFFFFFFFFFFFFFFFFFFFFFFFFFFFFFFFFFFFFFFFFFFFFFF  
@A00155:342:HHGFNDSXY:1:1438:29559:15671 1:N:0:GAACCTAG+TCCGCATA  
ATGCCGAGAGGGATGTGGAGGGCGAGAGAGAGCGACTTCTCTCGGGCCACAGCCTTACAGCTGTGGA  
GCACGGTATCCTCTGCCGAAACAGAGGTTGGACAAGACCGGAGGGGTCTCCAGTTCCAAAGGAGATG  
+  
FF:FFFFFFFFFFFFFFFFFFFFFFFFFFFFFFFFFFFFFFFFFFFFFFFFFFFFFFFFFFFFFFFFFFFFFFFF  
FFFFFFFF:FFFFFFFFFFFFFFFFFFFFFFFFFFFFFFFFFFFFFFFFFFFFFFFFFFFFFFFFFFFFFFFF  
@A00155:342:HHGFNDSXY:1:1438:17264:20275 1:N:0:GAACCTAG+TCCGCATA  
GTATCCTCTGCCGAAACAGAGGTTGGACAAGACCGGAGGGGTCTCCTAGTTCCAAAGGAGATGTACTC  
CGGGCTTGTTACGACCTACCGTGTAAGTCGTAGTCTAGTAGGCTACCTGACGAGTCCT  
+  
FFFFFFFFFFFFFFFFFFFFFFFFFFFFFFFFFFFFFFFFFFFFFFFFFFFFFFFFFFFFFFFFFFFFFFFF:FFF  
FFFF:FFFFFFFFFFFFFFFFFFFFFFFFFFFFFFFFFFFFFFFFFFFFFFFFFFFFFFFFFFFFFFFF  
@A00155:342:HHGFNDSXY:1:1438:8495:24345 1:N:0:GAACCTAG+TCCGCATA  
ACTTCTCTCGGGCCACAGCCTTACAGCTGTGGAGCACGGTATCCTCTGCCGAAACAGAGGTTGGACA  
AGACCGGAGGGGTCTCCTAGTTCCAAAGGAGATGTACTCCGGGCTTGTTACGACCTACCGTGTAAGT  
+  
FFF:FFFFFFFFFFFFFFFFFFFFFFFFFFFFFFFFFFFFFFFFFFFFFFFFFFFFFFFFFFFFFFFF  
FFFFFFFFFFFFFFFFFFFFFFFFFFFFFFFFFFFFFFFFFFFFFFFFFFFFFFFFFFFFFFFF:FF:FFFFFFFFFFFFFFFF:FFF  
@A00155:342:HHGFNDSXY:1:1438:29957:36933 1:N:0:GAACCTAG+TCCGCATA  
AAGGACTCACCTCTGGCCTATGGTCATCTCAATGCCGAGAGGGATGTAGAGGGCGAGAGAGAGCGACT  
TCTCTCGGGCCACAGCCTTACAGCTGTGGAGCACGGTATCCTCTGCCGAAACAGAGGTTGGACAAGA  
+  
FFFFFFFFFFFFFFFFFFFFFFFFFFFFFFFFFFFFFFFFFFFFFFFFFFFFFFFFFFFFFFFFFFFFFFFF  
FFFFFFFFFFFFFFFFFFFFFFFFFFFFFFFFFFFFFFFFFFFFFFFFFFFFFFFFFFFFFFFFFFFFFFFF  
@A00155:342:HHGFNDSXY:1:1439:13639:2472 1:N:0:GAACCTAG+TCCGCATA  
TGCCGAGAGGGATGTGGAGGGCGAGAGAGAGCGACTTCTCTCGGGCCACAGCCTTACAGCTGTGGAG



CACGGTATCCTCTGCCGAAACAGAGGTTGGACAAGACCGGAGGGGTCTCCTAGTTCCAAAGGAGATGT  
+  
FFFFFFFFFFFFFFFFFFFFFFFFFFFFFFFFFFFFFFFFFFFFFFFFFFFFFFFFFFFFFFFFFFFFFFFFFFFFFFFF  
FFFFFFFFFFFFFFFFFFFFFFFFFFFFFFFFFFFFFFFFFFFFFFFFFFFFFFFFFFFFFFFFFFFFFFFFFFFFFFFF  
@A00155:342:HHGFNDSXY:1:1439:19443:23766 1:N:0:GAACCTAG+TCCGCATA  
GGATGTGGAGGGCGAGAGAGAGCGACTTCTCTCGGGCCACAGCCTTACAGCTGTGGAGCACGGTATC  
CTCTGCCGAAACAGAGGTTGGACAAGACCGGAGGGGTCTCCTAGTTCCAAAGGAGATGTACTCC  
+  
FFFFFFFFFFFFFFFFFFFFFFFFFFFFFFFFFFFFFFFFFFFFFFFFFFFFFFFFFFFFFFFFFFFFFFFFFFFFFFFF  
FFFFFFFFFFFFFFFFFFFFFFFFFFFFFFFFFFFFFFFFFFFFFFFFFFFFFFFFFFFFFFFFFFFFFFFFFFFFFFFF  
@A00155:342:HHGFNDSXY:1:1439:20735:24408 1:N:0:GAACCTAG+TCCGCATA  
TCTCTCGGGCCACAGCCTTACAGCTGTGGAGCACGGTATCCTCTGCCGAAACAGAGGTTGGACAAGA  
CCGGAGGGGTCTCCTAGTTCCAAAGGAGATGTACTCCGGGCTTGTTACAGACCTACCGTGTAAAGTCGT  
+  
FFFFFFFFFFFFFFFFFFFFFFFFFFFFFFFFFFFFFFFFFFFFFFFFFFFFFFFFFFFFFFFFFFFFFFFFFFFFFFFF  
FFFFFFFFFFFFFFFFFFFFFFFFFFFFFFFFFFFFFFFFFFFFFFFFFFFFFFFFFFFFFFFFFFFFFFFFFFFFFFFF  
@A00155:342:HHGFNDSXY:1:1439:19768:24768 1:N:0:GAACCTAG+TCCGCATA  
GGATGTGGAGGGCGAGAGAGAGCGACTTCTCTCGGGCCACAGCCTTACAGCTGTGGAGCACGGTATC  
CTCTGCCGAAACAGAGGTTGGACAAGACCGGAGGGGTCTCCTAGTTCCAAAGGAGATGTACTCC  
+  
FFFFFFFFFFFFFFFFFFFFFFFFFFFFFFFFFFFFFFFFFFFFFFFFFFFFFFFFFFFFFFFFFFFFFFFFFFFFFFFF  
FFFFFFFFFFFFFFFFFFFFFFFFFFFFFFFFFFFFFFFFFFFFFFFFFFFFFFFFFFFFFFFFFFFFFFFFFFFFFFFF  
@A00155:342:HHGFNDSXY:1:1439:9444:27273 1:N:0:GAACCTAG+TCCGCATA  
TCGGCAGAGGATACCGTGCTCCACAGCTGTAAGGCTGTGGGCCCGAGAGAAGTCGCTCTCTCTCGCCC  
TCTACATCCCTCTCGGCATTGAGATGACCATAGGCCAGAGGTGAGTCCTTAAGTG  
+  
FFFFFFFFFFFFFFFFFFFFFFFFFFFFFFFFFFFFFFFFFFFFFFFFFFFFFFFFFFFFFFFFFFFFFFFFFFFFFFFF  
FFFFFFFFFFFFFFFFFFFFFFFFFFFFFFFFFFFFFFFFFFFFFFFFFFFFFFFFFFFFFFFFFFFFFFFFFFFFFFFF  
@A00155:342:HHGFNDSXY:1:1440:29857:17065 1:N:0:GAACCTAG+TCCGCATA  
ATCTCAATGCCGAGAGGGATGTAGAGGGCGAGAGAGAGCGACTTCTCTCGGGCCACAGCCTTACAGC  
TGTGGAGCACGGTATCCTCTGCCGAAACAGAGGTTGGACAAGACCGGAGGGGTCTCCTAGTTCCAAAG  
+  
FFFFFFFFFFFFFFFFFFFFFFFFFFFFFFFFFFFFFFFFFFFFFFFFFFFFFFFFFFFFFFFFFFFFFFFFFFFFFFFF  
FFFFFFFFFFFFFFFFFFFFFFFFFFFFFFFFFFFFFFFFFFFFFFFFFFFFFFFFFFFFFFFFFFFFFFFFFFFFFFFF  
@A00155:342:HHGFNDSXY:1:1440:21866:22388 1:N:0:GAACCTAG+TCCGCATA  
CCCACAGCCTTACAGCTGTGGAGCACGGTATCCTCTGCCGAAACAGAGGTTGGACAAGACCGGAGGGG  
TCTCCTAGTTCCAAAGGAGATGTACTCCGGGCTTGTTACAGACCTACCGTGTAAAGTCGTAGTCTAGTA  
+  
FFFFFFF:FFFFFFFFFFFFFFFFFFFFFFFFFFFFFFFFFFFFFFFFFFFFFFFFFFFFFFFFFFFFFFFFFFFFFFF,FFFFFFFF,FFFFFFF:FF  
FFFFFFFFFFFFFFFFFFFFFFFFFFFFFFFFFFFFFFFFFFFFFFFFFFFFFFFFFFFFFFFFFFFFFFFFFFFFFFF,FFFFFFFFF:FF,F,:FFFFF  
@A00155:342:HHGFNDSXY:1:1440:5665:35133 1:N:0:GAACCTAG+TCCGCATA  
ACCTCTGTTTCGGCAGAGGATACCGTGCTCCACAGCTGTAAGGCTGTGGGCCCGAGAGAAGTCGCTCT  
CTCTCGCCCTCCACATCCCTCTCGGCATTGAGATGACCATAGGCCAGAGGAGAGTCCTTAAGTGGACA  
+  
FFFFFFFFFFFFFFFFFFFFFFFFFFFFFFFFFFFFFFFFFFFFFFFFFFFFFFFFFFFFFFFFFFFFFFFFFFFFFFFF  
FFFFFFFFFFFFFFFFFFFFFFFFFFFFFFFFFFFFFFFFFFFFFFFFFFFFFFFFFFFFFFFFFFFFFFFFFFFFFFF:FFF,FFFFFFFFFFFFFFFFF:  
@A00155:342:HHGFNDSXY:1:1440:24460:36088 1:N:0:GAACCTAG+TCCGCATA  
AGAGGGATGTGGAGGGCGAGAGAGAGCGACTTCTCTCGGGCCACAGCCTTACAGCTGTGGAGCACGG  
TATCCTCTGCCGAAACAGAGGTTGGACAAGACCGGAGGGGTCTCCTAGTTCCAAAGGAGATGTACTCC  
+  
FFFFFFFFFFFFFFFFFFFFFFFFFFFFFFFFFFFFFFFFFFFFFFFFFFFFFFFFFFFFFFFFFFFFFFFFFFFFFFF:FFFFFFFFFFFFFFFFF  
FFFFFFFFFFFFFFFFFFFFFFFFFFFFFFFFFFFFFFFFFFFFFFFFFFFFFFFFFFFFFFFFFFFFFFFFFFFFFFF  
@A00155:342:HHGFNDSXY:1:1441:21811:5697 1:N:0:GAACCTAG+TCCGCATA  
GCGAGAGAGAGCGACTTCTCTCGGGCCACAGCCTTACAGCTGTGGAGCACGGTATCCTCTGCCGAAA

CAGAGGTTGGACAAGACCGGAGGGGTCTCCTAGTTCCTCAAAGGAGATGTACTCCGGGCTGTTACACGAC  
 +  
 FFFFFFFFFFFFFFFFFFFFFFFFFFFFFFFFFFFFFFFFFFFFFFFFFFFFFFFFFFFFFFFFFFFFFFFFFF:FFFFFFFFFFFFF  
 FFFFFFFFFFFFFFFFFFFFFFFFFFFFFFFFFFFFFFFFFFFFFFFFFFFFFFFFFFFFFFFFFFFFFFFFFF:FFFFFFFFFFFF  
 @A00155:342:HHGFNDSXY:1:1441:28004:11256 1:N:0:GAACCTAG+TCCGCATA  
 CATCTCAATGCCGAGAGGGATGTGGAGGGCGAGAGAGAGCGACTTCTCTCGGGCCCACAGCCTTACAG  
 CTGTGGAGCACGGTATCCTCTGCCGAAACAGAGGTTGGACAAGACCGGAGGGGTCTCCTAGTTCCTCAA  
 +  
 FFFFFFFFFFFFFFFFFFFFFF:F,FFFFFFFFFFFFFFFFFFFFFFFFFFFFFFFFFFFFFFFFFFFFFFFFF:F:FFF  
 FFFFFFFFFFFFFFFFFFFFFFFFFFFFFFFFFFFFFFFFFFFFFFFFFFFFFFFFFFFFFFFFFFFFFFFFFF  
 @A00155:342:HHGFNDSXY:1:1441:9362:14262 1:N:0:GAACCTAG+TCCGCATA  
 GAGAGGGATGTGGAGGGCGAGAGAGAGCGACTTCTCTCGGGCCCACAGCCTTACAGCTGTGGAGCACG  
 GTATCCTCTGCCGAAACAGAGGTTGGACAAGACCGGAGGGGTCTCCTAGTTCCTCAAAGGAGATGTACTC  
 +  
 FFFFFFFFFFFFFFFFFFFFFFFFFFFFFFFFFFFFFFFFFFFFFFFFFFFFFFFFFFFFFFFFFFFFFFFFFF  
 FFFFFFFFFFFFFFFFFFFFFFFFFFFFFFFFFFFFFFFFFFFFFFFFFFFFFFFFFFFFFFFFFFFFFFFFFF  
 @A00155:342:HHGFNDSXY:1:1441:8269:19914 1:N:0:GAACCTAG+TCCGCATA  
 CTATGGTCATCTCAATGCCGAGAGGGATGTGGAGGGCGAGAGAGAGCGACTTCTCTCGGGCCCACAGC  
 CTTACAGCTGTGGAGCACGGTATCCTCTGCCGAAACAGAGGTTGGACAAGACCGGAGGGGTCTCCTAG  
 +  
 FFFFFFFFFFFFFFFFFFFFFFFFFFFFFFFFFFFFFFFFFFFFFFFFFFFFFFFFFFFFFFFFFFFFFF,FFFF:FFFFFFFFFFFFF  
 FFF:FFFFFFFFFFFFFFFFFFFFFFFFFFFFFFFFFFFFFFFFFFFFFFFFFFFFFFFFFFFFFFFFFFFFF  
 @A00155:342:HHGFNDSXY:1:1441:31024:24596 1:N:0:GAACCTAG+TCCGCATA  
 CTTCTCTCGGGCCCACAGCCTTACAGCTGTGGAGCACGGTATCCTCTGCCGAAACAGAGGTTGGACAA  
 GACCGGAGGGGTCTCCTGGTTCCAAAGGAGATGTACTCCGGGCTTGTTACGACCTACCGTGTAAGTC  
 +  
 FFFFFFFFFFFFFFFFFFFFFF,F,FFFFFFFFFFFF:FFFFFFFFFFFFFFFFFFFFFFFFFFFFFFFFFFFFF  
 FFFFFFFFFFFFFFFFFFFFFFFFFFFFFFFFFFFFFFFFFFFFFFFFFFFFFFFFFFFFFFFFFFFFFFFFFF  
 @A00155:342:HHGFNDSXY:1:1441:1515:28729 1:N:0:GAACCTAG+TCCGCATA  
 CGACTTCTCTCGGGCCCACAGCCTTACAGCTGTGGAGCACGGTATCCTCTGCCGAAACAGAGGTTGGA  
 CAAGACCGGAGGGGTCTCCTAGTTCCTCAAAGGAGATGTACTCCGGGCTTGTTACGACCTACCGTGTA  
 +  
 FFFFFFFFFFFFFFFFFF:FFFFFFFFFFFFFFFFFFFFFFFFFFFFFFFFFFFFFFFFFFFFFFFFFFFFF:FFFFFFFFFFFF  
 FFFFFFFFFFFFFFFFFFFFFFFFFFFFFFFFFFFFFFFFFFFFFFFFFFFFFFFFFFFFFFFFFFFFFFFFFF:FF:FFFFFFFFFFFFF  
 @A00155:342:HHGFNDSXY:1:1442:30391:2143 1:N:0:GAACCTAG+TCCGCATA  
 TATGGAGGGCGAGAGAGAGCGACTTCTCTCGGGCCCACAGCCTTACAGCTGTGGAGCACGGTATCCTC  
 TGCCGAAACAGAGGTTGGACAAGACCGGAGGGGTCTCCTAGTTCCTCAAAGGAGATGTACTCCGGG  
 +  
 :FFFFFFFFFFFFFFFFFFFFFFFFFFFFFFFFFFFFFFFFFFFFFFFFFFFFFFFFFFFFFFFFFFFFF:FFFFF  
 FF:FFFFFFFFFFFFFFFFFFFFFFFFFFFFFFFFFFFFFFFFFFFFFFFFFFFFFFFFFFFFFFFFFFFFF  
 @A00155:342:HHGFNDSXY:1:1442:1976:3286 1:N:0:GAACCTAG+TCCGCATA  
 CGAGAGGGATGTGGAGGGCGAGAGAGAGCGACTTCTCTCGGGCCCACAGCCTTACAGCTGTGGAGCAC  
 GGTATCCTCTGCCGAAACAGAGGTTGGACAAGACCGGAGGGGTCTCCTAGTTCCTCAAAGGAGATGTAC  
 +  
 FFFFFFFFFFFFFFFFFFFFFFFFFFFFFFFFFFFFFFFFFFFFFFFFFFFFFFFFFFFFFFFFFFFFFFFFFF  
 FFFFFFFFFFFFFFFFFFFFFFFFFFFFFFFFFFFFFFFFFFFFFFFFFFFFFFFFFFFFFFFFFFFFFFFFFF  
 @A00155:342:HHGFNDSXY:1:1442:17318:14137 1:N:0:GAACCTAG+TCCGCATA  
 TGTAGAGGGCGAGAGAGAGCGACTTCTCTCGGGCCCACAGCCTTACAGCTGTGGAGCACGGTATCCTC  
 TGCCGAAACAGAGGTTGGACAAGACCGGAGGGGTCTCCTAGTTCCTCAAAGGAGATGTACTCCGGG  
 +  
 FFFFFFFFFFFFFFFFFFFFFFFFFFFFFFFFFFFFFFFFFFFFFFFFFFFFFFFFFFFFFFFFFFFFFFFFFF  
 FFFFFFFFFFFFFFFFFFFFFFFFFFFFFFFFFFFFFFFFFFFFFFFFFFFFFFFFFFFFFFFFFFFFFFFFFF  
 @A00155:342:HHGFNDSXY:1:1442:17481:14418 1:N:0:GAACCTAG+TCCGCATA  
 TGTAGAGGGCGAGAGAGAGCGACTTCTCTCGGGCCCACAGCCTTACAGCTGTGGAGCACGGTATCCTC

TGCCGAAACAGAGGTTGGACAAGACCGGAGGGGTCTCCTAGTTCCAAAGGAGATGTACTCCGGG  
+  
FFFFFFFFFFFFFFFFFFFFFFFFFFFFFFFFFFFFFFFFFFFFFFFFFFFFFFFFFFFFF:FFFFFFFFFFFFFFFFFFFFFFFFFFFFFFFF  
FFFFFFFFFFFFFFFFFFFFFFFFFFFFFFFFFFFFFFFFFFFFFFFFFFFFFFFFFFFFFFFFF::FFFFFFF  
@A00155:342:HHGFNDSXY:1:1443:5918:14779 1:N:0:GAACCTAG+TCCGCATA  
CAGCCTTACAGCTGTGGAGCACGGTATCCTCTGCCGAAACAGAGGTTGGACAAGACCGGAGGGGTCTC  
CTAGTTCCAAAGGAGATGTACTCCGGGCTTGTTACACGACCTACCGTGTAAAGTCGTAGTCTAGTAGGCT  
+  
FFFFFFF:FFFF:FFFFFFFFFFFFFFFFFFFFFFFFFFFFFFFFFFFFFFFFFFFFFFFFFFFFFFFF  
FFFFFFFFFFFFFFFFFFFFFFFFFFFFFFFFFFFFFFFFFFFFFFFFFFFFFFFFFFFFFFFFF,FFFFFF:FF:FFFFFFFFFFFFFFFF  
@A00155:342:HHGFNDSXY:1:1443:19479:20635 1:N:0:GAACCTAG+TCCGCATA  
TCCTCTGCCGAAACAGAGGTTGGACAAGACCGGAGGGGTCTCCTAGTTCCAAAGGAGATGTACTCCGG  
GCTTGTTACACGACCTACCGTGTAAAGTCGTAGTCTAGTAGGCTACCTGACGAGTCCTTTTTAGGACGAA  
+  
FFFFFFFFFFFFFFFFFFFFFFFFFFFFFFFFFFFFFFFFFFFFFFFFFFFFFFFFFFFFFFFFF  
FFFFFFFFFFFFFFFFFFFFFFFFFFFFFFFFFFFFFFFFFFFFFFFFFFFFFFFFFFFFFFFFF  
@A00155:342:HHGFNDSXY:1:1444:22218:1110 1:N:0:GAACCTAG+TCCGCATA  
AGGGATGTAGAGGGCGAGAGAGAGCGACTTCTCTCGGGCCCACAGCCTTACAGCTGTGGAGCACGGTA  
TCCTCTGCCGAAACAGAGGTTGGACAAGACCGGAGGGGTCTCCTAGTTCCAAAGGAGATGTACTCCGG  
+  
FFFFFFFFFFFFFFFFFFFFFFFFFFFFFFFFFFFFFFFFFFFFFFFFFFFFFFFFFFFFFFFFF:FFFFFF:FFFFFFFFFFFFFFFFF:FFFF:  
FFFFFFFFFFFFFFFFFFFFFFFFFFFFFFFFF:FFFFFFFFF:FFFFFFFFFFFFFFFFF:FFFFFFFFFFFFFFFFF  
@A00155:342:HHGFNDSXY:1:1444:29206:5666 1:N:0:GAACCTAG+TCCGCATA  
GGATGTGGAGGGCGAGAGAGAGCGACTTCTCTCGGGCCCACAGCCTTACAGCTGTGGAGCACGGTATC  
CTCTGCCGAAACAGAGGTTGGACAAGACCGGAGGGGTCTCCTAGTTCCAAAGGAGATGTACTC  
+  
F:FFF,FFFF:F::FFFFFFFFF,FFFFFFFF:F:FFFFFFFFF,FFFFFFFFF,FFF:FFFF  
FFFFFFFF,FFF,FFFFFFFFF:F:FFFFFF:FF:FFFFFFFFF:FFF::FFFFFFFFF  
@A00155:342:HHGFNDSXY:1:1444:14805:6120 1:N:0:GAACCTAG+TCCGCATA  
ATCTCAATGCCGAGAGGGATGTGGAGGGCGAGAGAGAGCGACTTCTCTCGGGCCCACAGCCTTACAGC  
TGTGGAGCACGGTATCCTCTGCCGAAACAGAGGTTGGACAAGACCGGAGGGGTCTCCTAGTTCCAAAG  
+  
FFFFFFFFFFFFFFFFFFFFFFFFFFFFFFFFFFFFFFFFFFFFFFFFFFFFFFFFFFFFFFFFF  
FFFFFFFFFFFFFFFFFFFFFFFFFFFFFFFFFFFFFFFFFFFFFFFFFFFFFFFFFFFFFFFFF:FFFFFFFFFFFFFFFF  
@A00155:342:HHGFNDSXY:1:1444:31458:12007 1:N:0:GAACCTAG+TCCGCATA  
AGCGACTTCTCTCGGGCCCACAGCCTTACAGCTGTGGAGCACGGTATCCTCTGCCGAAACAGAGGTTG  
GACAAGACCGGAGGGGTCTCCTGGTTCCAAAGGAGATGTACTCCGGGCTTGTTACACGACCTACCGTGT  
+  
FFFFFFFFFFFFFFFFFFFFFFFFFFFFFFFFFFFFFFFFFFFFFFFFFFFFFFFFFFFFFFFFF:FFFFFFFFFFFFFFFFFFFFFFFF  
FFFFFFFFFFFFFFFFFFFFFFFFFFFFFFFFFFFFFFFFFFFFFFFFFFFFFFFFFFFFFFFFF  
@A00155:342:HHGFNDSXY:1:1444:8983:23970 1:N:0:GAACCTAG+TCCGCATA  
GTATCCTCTGCCGAAACAGAGGTTGGACAAGACCGGAGGGGTCTCCTGGTTCCAAAGGAGATGTACTC  
CGGGCTTGTTACACGACCTACCGTGTAAAGTCGTAGTCTAGTAGGCTACCTGACGAGTCCTTTTTAGGAC  
+  
FFFFFFFFFFFFFFFFFFFFFFFFFFFFFFFFFFFFFFFFFFFFFFFFFFFFFFFFFFFFFFFFF  
FFFFFFFFFFFFFFFFFFFFFFFFFFFFFFFFFFFFFFFFFFFFFFFFFFFFFFFFFFFFFFFFF  
@A00155:342:HHGFNDSXY:1:1444:8965:24032 1:N:0:GAACCTAG+TCCGCATA  
GTATCCTCTGCCGAAACAGAGGTTGGACAAGACCGGAGGGGTCTCCTGGTTCCAAAGGAGATGTACTC  
CGGGCTTGTTACACGACCTACCGTGTAAAGTCGTAGTCTAGTAGGCTACCTGACGAGTCCTTTTTAGGAC  
+  
FFFFFFFFFFFFFFFFFFFFFFFFFFFFFFFFFFFFFFFFFFFFFFFFFFFFFFFFFFFFFFFFF  
FFFFFFFFFFFFFFFFFFFFFFFFFFFFFFFFFFFFFFFFFFFFFFFFFFFFFFFFFFFFFFFFF  
@A00155:342:HHGFNDSXY:1:1444:15664:24142 1:N:0:GAACCTAG+TCCGCATA  
TGTCCACTTAAGGACTCACCTCTGGCCTATGGTCATCTCAATGCCGAGAGGGATGTAGAGGGCGAGAG

AGAGCGACTTCTCTCGGGCCACAGCCTTACAGCTGTGGAGCACGGTATCCTCTGCCGAAACAGAGGT  
+  
FFFFFFFFFFFFFFFFFFFFFFFFFFFFFFFFFFFFFFFFFFFFFFFFFFFFFFFFFFFFFFFFFFFFFFFF  
FFFFFFFF:FFFFFFFFFFFFFFFFFFFFFFFFFFFFFFFFFFFFFFFFFFFFFFFFFFFFFFFFFFFFFFFF  
@A00155:342:HHGFNDSXY:1:1444:8223:30671 1:N:0:GAACCTAG+TCCGCATA  
AGAGAGCGACTTCTCTCGGGCCACAGCCTTACAGCTGTGGAGCACGGTATCCTCTGCCGAAACAGAG  
GTTGGACAAGACCGGAGGGGTCTCCTAGTTCCAAAGGAGATGTACTCCGGGCTTGTTACAG  
+  
FFFFFFFFFFFFFFFFFFFFFFFFFFFFFFFFFFFFFFFFFFFFFFFFFFFFFFFFFFFFFFFFFFFFFFFF  
FFFFFFFFFFFFFFFFFFFFFFFFFFFFFFFFFFFFFFFFFFFFFFFFFFFFFFFFFFFFFFFFFFFFFFFF  
@A00155:342:HHGFNDSXY:1:1445:2636:21214 1:N:0:GAACCTAG+TCCGCATA  
AATGCCGAGAGGGATGTGGAGGGCGAGAGAGAGCGACTTCTCTCGGGCCACAGCCTTACAGCTGTGG  
AGCACGGTATCCTCTGCCGAAACAGAGGTTGGACAAGACCGGAGGGGTCTCCTAGTTCCAAAGGAGAT  
+  
FFFFFFFFFFFFFFFFFFFFFFFFFFFFFFFFFFFFFFFFFFFFFFFFFFFFFFFFFFFFFFFFFFFFFFFF  
FFFFFFFFFFFFFFFFFFFFFFFFFFFFFFFFFFFFFFFFFFFFFFFFFFFFFFFFFFFFFFFFFFFFFFFF  
@A00155:342:HHGFNDSXY:1:1445:23701:28291 1:N:0:GAACCTAG+TCCGCATA  
CTTCTCTCGGGCCACAGCCTTACAGCTGTGGAGCACGGTATCCTCTGCCGAAACAGAGGTTGGACAA  
GACCGGAGGGGTCTCCTAGTTCCAAAGGAGATGTACTCCGGGCTTGTTACGACCTACCGTGTA  
+  
FFFFFFFFFFFFFFFFFFFFFFFFFFFFFFFFFFFFFFFFFFFFFFFFFFFFFFFFFFFFFFFFFFFFFFFF  
FFFFFFFFFFFFFFFFFFFFFFFFFFFFFFFFFFFFFFFFFFFFFFFFFFFFFFFFFFFFFFFFFFFFFFFF  
@A00155:342:HHGFNDSXY:1:1446:8603:12132 1:N:0:GAACCTAG+TCCGCATA  
GGATGTGGAGGGCGAGAGAGAGCGACTTCTCTCGGGCCACAGCCTTACAGCTGTGGAGCACGGTATC  
CTCTGCCGAAACAGAGGTTGGACAAGACCGGAGGGGTCTCCTAGTTCCAAAGGAGATGTA  
+  
FFFFFFFFFFFFFFFFFFFFFFFFFFFFFFFFFFFFFFFFFFFFFFFFFFFFFFFFFFFFFFFFFFFFFFFF  
FFFFFFFFFFFFFFFFFFFFFFFFFFFFFFFFFFFFFFFFFFFFFFFFFFFFFFFFFFFFFFFFFFFFFFFF  
@A00155:342:HHGFNDSXY:1:1446:12915:22044 1:N:0:GAACCTAG+TCCGCATA  
TTAGATCAGCTGTGTCCACTTAAGGACTCACCTCTGGCCTATGGTCATCTCAATGCCGAGAGGGATGT  
GGAGGGCGAGAGAGAGCGACTTCTCTCGGGCCACAGCCTTACAGCTGTGGAGCACGGTATCCTCTGC  
+  
FFFFFFFFFFFFFFFFFFFFFFFFFFFFFFFFFFFFFFFFFFFFFFFFFFFFFFFFFFFFFFFFFFFFFFFF  
FFFFFFFFFFFFFFFFFFFFFFFFFFFFFFFFFFFFFFFFFFFFFFFFFFFFFFFFFFFFFFFFFFFFFFFF  
@A00155:342:HHGFNDSXY:1:1446:11379:36166 1:N:0:GAACCTAG+TCCGCATA  
CTCTGGCCTATGGTCATCTCAATGCCGAGAGGGATGTGAAGGGCGAGAGAGAGCGACTTCTCTCGGGC  
CCACAGCCTTACAGCTGTGGAGCACGGTATCCTCTGCCGAAACAGAGGTTGGACAAGACCGGAGGGGT  
+  
FFFFFFFFFFFFFFFFFFFFFFFFFFFFFFFFFFFFFFFFFFFFFFFFFFFFFFFFFFFFFFFFFFFFFFFF  
FFFFFFFFFFFFFFFFFFFFFFFFFFFFFFFFFFFFFFFFFFFFFFFFFFFFFFFFFFFFFFFFFFFFFFFF  
@A00155:342:HHGFNDSXY:1:1447:8250:11522 1:N:0:GAACCTAG+TCCGCATA  
GGATGTAGAGGGCGAGAGAGAGCGACTTCTCTCGGGCCACAGCCTTACAGCTGTGGAGCACGGTATC  
CTCTGCCGAAACAGAGGTTGGACAAGACCGGAGGGGTCTCCTAGTTCCAAAGGAGATGTACTCC  
+  
FFFFFFFFFFFFFFFFFFFFFFFFFFFFFFFFFFFFFFFFFFFFFFFFFFFFFFFFFFFFFFFFFFFFFFFF  
FFFFFFFFFFFFFFFFFFFFFFFFFFFFFFFFFFFFFFFFFFFFFFFFFFFFFFFFFFFFFFFFFFFFFFFF  
@A00155:342:HHGFNDSXY:1:1447:3332:15718 1:N:0:GAACCTAG+TCCGCATA  
AGAGAGAGCGACTTCTCTCGGGCCACAGCCTTACAGCTGTGGAGCACGGTATCCTCTGCCGAAACAG  
AGGTTGGACAAGACCGGAGGGGTCTCCTAGTTCCAAAGGAGATGTACTCCGGGCTTGTTACGACCTA  
+  
FFFFFFFFFFFFFFFFFFFFFFFFFFFFFFFFFFFFFFFFFFFFFFFFFFFFFFFFFFFFFFFFFFFFFFFF  
FFFFFFFFFFFFFFFFFFFFFFFFFFFFFFFFFFFFFFFFFFFFFFFFFFFFFFFFFFFFFFFFFFFFFFFF  
@A00155:342:HHGFNDSXY:1:1447:6849:17206 1:N:0:GAACCTAG+TCCGCATA  
TGTCCACTTAAGGACTCACCTCTGGCCTATGGTCATCTCAATGCCGAGAGGGATGTGGAGGGCGAGAG

AGAGCGACTTCTCTCGGGCCCACAGCCTTACAGCTGTGGAGCACGGTATCCTCTGCCGAAACAGAGGT  
+  
FFFFFFFFFFFFFFFFFFFFFFFFFFFFFFFFFFFFFFFFFFFFFFFFFFFFFFFFFFFFFFFF:FF:FFFF:FFFFFFFFFFFF  
FFFFFFFFFFFFFFFFFFFFFFFFFFFFFFFFFFFFFFFFFFFFFFFFFFFFFFFFFFFFFFFF,FFFFFFFFFFFFFFFF:FFFFFFFFFFFFFFFF:FFF  
@A00155:342:HHGFNDSXY:1:1447:25500:26240 1:N:0:GAACCTAG+TCCGCATA  
TTAAGGACTCACCTCTGGCCTATGGTCATCTCAATGCCGAGAGGGATGTGGAGGGCGAGAGAGAGCGA  
CTTCTCTCGGGCCCACAGCCTTACAGCTGTGGAGCACGGTATCCTCTGCCGAAACAGAGGTTGGACAA  
+  
FFFFFFFFFFFFFFFFFFFFFFFFFFFFFFFFFFFFFFFFFFFFFFFFFFFFFFFFFFFFFFFFFFFFFFFF  
FFFFFFFFFFFFFFFFFFFFFFFFFFFFFFFFFFFFFFFFFFFFFFFFFFFFFFFFFFFFFFFFFFFFFFFF  
@A00155:342:HHGFNDSXY:1:1448:17698:12790 1:N:0:GAACCTAG+TCCGCATA  
AAGGACTCACCTCTGGCCTATGGTCATCTCAATGCCGAGAGGGATGTAGAGGGCGAGAGAGAGCGACT  
TCTCTCGGGCCCACAGCCTTACAGCTGTGGAGCACGGTATCCTCTGCCGAAACAGAGGTTGGACAAGA  
+  
FFFFFFFFFFFFFFFFFFFFFFFFFFFFFFFFFFFFFFFFFFFFFFFFFFFFFFFFFFFFFFFFFFFFFFFF  
FFFFFFFFFFFFFFFFFFFFFFFFFFFFFFFFFFFFFFFFFFFFFFFFFFFFFFFFFFFFFFFFFFFFFFFF  
@A00155:342:HHGFNDSXY:1:1448:18005:13166 1:N:0:GAACCTAG+TCCGCATA  
AAGGACTCACCTCTGGCCTATGGTCATCTCAATGCCGAGAGGGATGTAGAGGGCGAGAGAGAGCGACT  
TCTCTCGGGCCCACAGCCTTACAGCTGTGGAGCACGGTATCCTCTGCCGAAACAGAGGTTGGACAAGA  
+  
FFFFFFFFFFFFFFFFFFFFFFFFFFFFFFFFFFFFFFFFFFFFFFFFFFFFFFFFFFFFFFFFFFFFFFFF  
FFFFFFFFFFFFFFFFFFFFFFFFFFFFFFFFFFFFFFFFFFFFFFFFFFFFFFFFFFFFFFFFFFFFFFFF  
@A00155:342:HHGFNDSXY:1:1448:29098:18161 1:N:0:GAACCTAG+TCCGCATA  
CTATGGTCATCTCAATGCCGAGAGGGATGTGGAGGGCGAGAGAGAGCGACTTCTCTCGGGCCCACAGC  
CTTACAGCTGTGGAGCACGGTATCCTCTGCCGAAACAGAGGTTGGACAAGACCGGAGGGGTCTCCTAG  
+  
FF:FFFFFFFFFFFFFFFFFFFFFFFF:FF:F:FFFFFFFFFFFFFFFFFFFFFFFFFFFFFFFFFFFFFFFF  
FFFFFFFFFFFFFFFFFFFFFFFFFFFFFFFFFFFFFFFFFFFFFFFFFFFFFFFFFFFFFFFFFFFFFFFF:F  
@A00155:342:HHGFNDSXY:1:1449:8250:10081 1:N:0:GAACCTAG+TCCGCATA  
CTTCTCTCGGGCCCACAGCCTTACAGCTGTGGAGCACGGTATCCTCTGCCGAAACAGAGGTTGGACAA  
GACCGGAGGGGTCTCCTAGTTCAAAGGAGATGTACTCCGTGCTTGTTACGACCTACCGTGTAAGTC  
+  
FFFFFFFFFFFFFFFFFFFFFFFFFFFFFFFFFFFFFFFFFFFFFFFFFFFFFFFFFFFFFFFFFFFFFFFF  
F:FFFFFFFFFFFFFFFFFFFFFFFFFFFFFFFFFFFFFFFFFFFFFFFFFFFFFFFFFFFFFFFF:FFFFFFFFFFFF  
@A00155:342:HHGFNDSXY:1:1449:13304:36213 1:N:0:GAACCTAG+TCCGCATA  
CCTTACAGCTGTGGAGCACGGTATCCTCTGCCGAAACAGAGGTTGGACAAGACCGGAGGGGTCTCCTG  
GTTCAAAGGAGATGTACTCCGGGCTTGTTACGACCTACCGTGTAAGTCGTAGTCTAGTAGGCTACC  
+  
FFFFFFFFFFFFFFFFFFFFFFFFFFFFFFFFFFFFFFFFFFFFFFFFFFFFFFFFFFFFFFFFFFFFFFFF  
FFFFFFFF:FFFF:FFFFFFFFFFFFFFFFFFFFFFFFFFFFFFFFFFFFFFFFFFFFFFFFFFFFFFFFFFFF  
@A00155:342:HHGFNDSXY:1:1450:27425:2613 1:N:0:GAACCTAG+TCCGCATA  
GTCATCTCAATGCCGAGAGGGATGTAGAGGGCGAGAGAGAGCGACTTCTCTCGGGCCCACAGCCTTAC  
AGCTGTGGAGCACGGTATCCTCTGCCGAAACAGAGGTTGGACAAGACCGGAGGGGTCTCC  
+  
FFFFFFFFFFFFFFFFFFFFFFFFFFFFFFFFFFFFFFFFFFFFFFFFFFFFFFFFFFFFFFFFFFFFFFFF  
FFFFFFFFFFFFFFFFFFFFFFFFFFFFFFFFFFFFFFFFFFFFFFFFFFFFFFFFFFFFFFFF:FFFFFFFFFFFF  
@A00155:342:HHGFNDSXY:1:1450:5240:2863 1:N:0:GAACCTAG+TCCGCATA  
TGTGTCCACTTAAGGACTCACCTCTGGCCTATGGTCATCTCTATGCCGAGAGGGATGTGGAGGGCGAG  
AGAGAGCGACTTCTCTCGGGCCCACAGCCTTACAGCTGTGGAGCACGGTATCCTCTGCCGAAACAGAG  
+  
FFFFFFFFFFFFFFFFFFFFFFFFFFFFFFFFFFFFFFFFFFFFFFFFFFFFFFFFFFFFFFFFFFFFFFFF  
:FFFFFFFFFFFFFFFFFFFF:F,FFFFFFFFFFFFFFFFFFFFFFFFFFFFFFFFFFFFFFFFFFFFFFFFFFFF  
@A00155:342:HHGFNDSXY:1:1450:31521:9486 1:N:0:GAACCTAG+TCCGCATA  
TCTCTCGGGCCCACAGCCTTACAGCTGTGGAGCACGGTATCCTCTGCCGAAACAGAGGTTGGACAAGA

```
CCGGAGGGGTCTCCTAGTTCCAAAGGAGATGTACTCCGGGCTTGTTACACGACCTACCGTGTAAAGTCGT  
+  
FFFFFFFFFFFFFFFFFFFFFFFFFFFFFFFFFFFFFFFFFFFFFFFFFFFFFFFFFFFFF:FFFFFFFFFFFFFFFFFFFFFFFFFFFFFFFFFFFFFFFFFFFFF  
FFFFFFFFFFFFFFFFFFFFFFFFFFFFFFFFFFFFFFFFFFFFFFFFFFFFFFFFFFFFFFFFFFFFFFFFFFFFFFFFFFFFFFFFFFFFFFFFFFFFFFFFFFFFF:  
@A00155:342:HHGFNDSXY:1:1450:31485:9518 1:N:0:GAACCTAG+TCCGCATA  
TCTCTCGGGCCCACAGCCTTACAGCTGTGGAGCACGGTATCCTCTGCCGAAACAGAGGTTGGACAAGA  
CCGGAGGGGTCTCCTAGTTCCAAAGGAGATGTACTCCGGGCTTGTTACACGACCTACCGTGTAAAGTCGT  
+  
FFFFFFFFFFFFFFFFFFFFFFFFFFFFFFFFFFFFFFFFFFFFFFFFFFFFFFFFFFFFF:FFFFFFFFFFFFFFFFFFFFFFFFFFFFFFFFFFFFFFFFFFFFF:F:F  
FFFFFFFFFFFFFFFFFFFFFFFFFFFFFFFFFFFFFFFFFFFFFFFFFFFFFFFFFFFFFFFFFFFFFFFFFFFFFFFFFFFFFFFFFFFFFFFFFFFFFFFFFFFFF  
@A00155:342:HHGFNDSXY:1:1450:12409:16376 1:N:0:GAACCTAG+TCCGCATA  
AATGCCGAGAGGGATGTGGAGGGCGAGAGAGAGCGACTTCTCTCGGGCCCACAGCCTTACAGCTGTGG  
AGCACGGTATCCTCTGCCGAAACAGAGGTTGGACAAGACCGGAGGGGTCTCCTAGTTCCAAAGGAGAT  
+  
FFFFFFFFFFFFFFFFFFFFFFFFFFFFFFFFFFFFFFFFFFFFFFFFFFFFFFFFFFFFFFFFFFFFFFFFFFFFFFFFFFFFFFFFFFFFFFFFFFFFFFFFFFFFF  
FFF:FFFFFFFFFFFFFFFFFFFFFFFFFFFFFFFFFFFFFFFFFFFFFFFFFFFFFFFFFFFFFFFFFFFFFFFFFFFFFFFFFFFFFFFFFFFFFFFFFFFFFFFFFFFFF  
@A00155:342:HHGFNDSXY:1:1450:9100:16783 1:N:0:GAACCTAG+TCCGCATA  
ACTTCTCTCGGGCCCACAGCCTTACAGCTGTGGAGCACGGTATCCTCTGCCGAAACAGAGGTTGGACA  
AGACCGGAGGGGTCTCCTAGTTCCAAAGGAGATGTACTCCGGGCTTGTTACACGACCTACCGTGTAAAGT  
+  
FFFFFFFFFFFFFFFFFFFFFFFFFFFFFFFFFFFFFFFFFFFFFFFFFFFFFFFFFFFFFFFFFFFFFFFFFFFFFFFFFFFFFFFFFFFFFFFFFFFFFFFFFFFFF  
FFFFFFFFFFFFFFFFFFFFFFFFFFFFFFFFFFFFFFFFFFFFFFFFFFFFFFFFFFFFFFFFFFFFFFFFFFFFFFFFFFFFFFFFFFFFFFFFFFFFFFFFFFFFF,FF  
@A00155:342:HHGFNDSXY:1:1450:5312:17362 1:N:0:GAACCTAG+TCCGCATA  
AGATCAGCTGTGTCCACTTAAGGACTCACCTCTGGCCTATGGTCATCTCAATGCCGAGAGGGATGTAG  
AGGGCGAGAGAGAGCGACTTCTCTCGGGCCCACAGCCTTACAGCTGTGGAGCACGGTATCCTCTGCCG  
+  
FFFFFFFFFFFFFFFFFFFFFFFFFFFFFFFFFFFFFFFFFFFFFFFFFFFFFFFFFFFFFFFFFFFFFFFFFFFFFFFFFFFFFFFFFFFFFFFFFFFFFFFFFFFFF,F,FF  
FFFFFFFFFFFFFFFFFFFFFFFFFFFFFFFFFFFFFFFFFFFFFFFFFFFFFFFFFFFFFFFFFFFFFFFFFFFFFFFFFFFFFFFFFFFFFFFFFFFFFFFFFFFFF  
@A00155:342:HHGFNDSXY:1:1451:10999:4100 1:N:0:GAACCTAG+TCCGCATA  
GAGCGACTTCTCTCGGGCCCACAGCCTTACAGCTGTGGAGCACGGTATCCTCTGCCGAAACAGAGGTT  
GGACAAGACCGGAGGGGTCTCCTAGTTCCAAAGGAGATGTACTCCGGGCTTGTTACACGACCTACCGTG  
+  
FFFFFFFFFFFFFFFFFFFFFFFFFFFFFFFFFFFFFFFFFFFFFFFFFFFFFFFFFFFFFFFFFFFFFFFFFFFFFFFFFFFFFFFFFFFFFFFFFFFFFFFFFFFFF  
FFFFFFFFFFFFFFFFFFFFFFFFFFFFFFFFFFFFFFFFFFFFFFFFFFFFFFFFFFFFFFFFFFFFFFFFFFFFFFFFFFFFFFFFFFFFFFFFFFFFFFFFFFFFF:  
@A00155:342:HHGFNDSXY:1:1451:11812:5040 1:N:0:GAACCTAG+TCCGCATA  
GGCCAGAGGTGAGTCCTTAAGTGGACACAGCTGATCTAAGGCGGTGTGGCGGGGCATGGGTTTTAACCC  
CATGACGGTCGGAGTCTAGTAGGCTCCCTGATGAGTCCGTTCCAAGGACGAAACCGTCGTTACTCT  
+  
FFFFFFFFFFFFFFFFFFFFFFFFFFFFFFFFFFFFFFFFFFFFFFFFFFFFFFFFFFFFFFFFFFFFFFFFFFFFFFFFFFFFFFFFFFFFFFFFFFFFFFFFFFFFF  
FFFFFFFFFFFFFFFFFFFFFFFFFFFFFFFFFFFFFFFFFFFFFFFFFFFFFFFFFFFFFFFFFFFFFFFFFFFFFFFFFFFFFFFFFFFFFFFFFFFFFFFFFFFFF,  
@A00155:342:HHGFNDSXY:1:1451:4390:11318 1:N:0:GAACCTAG+TCCGCATA  
CAATGCCGAGAGGGATGTGGAGGGCGAGAGAGAGCGACTTCTCTCGGGCCCACAGCCTTACAGCTGTG  
GAGCACGGTATCCTCTGCCGAAACAGAGGTTGGACAAGACCGGAGGGGTCTCCTAGTTCCAAAGGAGA  
+  
FFFFFFFFFFFFFFFFFFFFFFFFFFFFFFFFFFFFFFFFFFFFFFFFFFFFFFFFFFFFFFFFFFFFFFFFFFFFFFFFFFFFFFFFFFFFFFFFFFFFFFFFFFFFF,  
FFFFFFFFFFFFFFFFFFFFFFFFFFFFFFFFFFFFFFFFFFFFFFFFFFFFFFFFFFFFFFFFFFFFFFFFFFFFFFFFFFFFFFFFFFFFFFFFFFFFFFFFFFFFF,  
@A00155:342:HHGFNDSXY:1:1451:16179:17331 1:N:0:GAACCTAG+TCCGCATA  
GCGAGAGAGAGCGACTTCTCTCGGGCCCACAGCCTTACAGCTGTGGAGCACGGTATCCTCTGCCGAAA  
CAGAGGTTGGACAAGACCGGAGGGGTCTCCTAGTTCCAAAGGAGATGTACTCCGGGCTTGTTACACGAC  
+  
FFFFFFFFFFFFFFFFFFFFFFFFFFFFFFFFFFFFFFFFFFFFFFFFFFFFFFFFFFFFFFFFFFFFFFFFFFFFFFFFFFFFFFFFFFFFFFFFFFFFFFFFFFFFF  
FFFFFFFFFFFFFFFFFFFFFFFFFFFFFFFFFFFFFFFFFFFFFFFFFFFFFFFFFFFFFFFFFFFFFFFFFFFFFFFFFFFFFFFFFFFFFFFFFFFFFFFFFFFFF:  
@A00155:342:HHGFNDSXY:1:1451:27715:27978 1:N:0:GAACCTAG+TCCGCATA  
AAGGACTCACCTCTGGCCTATGGTCATCTCAATGCCGAGAGGGATGTGAAGGGCGAGAGAGAGCGACT
```

TCTCTCGGGCCACAGCCTTACAGCTGTGGAGCACGGTATCCTCTGCCGAAACAGAGGTTGGACAAGA  
+  
FFFFFFFFFFFFFFFFFFFFFFFFFFFFFFFFFFFFFFFFFFFFFFFFFFFFFFFFFFFFF:FFFFFFFFFFFFFFFFFFFFFFFFFFFFFFFFFFFFF  
FFFF:FFFFFFFFFFFFFFFFFFFFFFFFFFFFFFFFFFFFFFFFFFFFFFFFFFFFFFFFFFFFF:FFFFFFFFFFFFFFFFFFFFFFFFFFFFFFFFFFFFF  
@A00155:342:HHGFNDSXY:1:1451:11840:29418 1:N:0:GAACCTAG+TCCGCATA  
CTTCTCTCGGGCCACAGCCTTACAGCTGTGGAGCACGGTATCCTCTGCCGAAACAGAGGTTGGACAA  
GACCGGAGGGGTCTCCTAGTTCAAAGGAGATGTACTCCGGGCTTGTTACGACCTACCGTGTAAGTC  
+  
FFFFFFFFFFFFFFFFFFFFFFFFFFFFFFFFFFFFFFFFFFFFFFFFFFFFFFFFFFFFF:FFFFFFFFFFFFFFFFFFFFFFFFFFFFFFFFFFFFF  
:FFFFFFFFFFFF,FFFFFF:F:FFFFFFFFFFFFFFFFFFFFFFFFFFFFFFFFFFFFF:FFFFFFFFFFFF  
@A00155:342:HHGFNDSXY:1:1451:18213:31657 1:N:0:GAACCTAG+TCCGCATA  
GAGCGACTTCTCTCGGGCCACAGCCTTACAGCTGTGGAGCACGGTATCCTCTGCCGAAACAGAGGTT  
GGACAAGACCGGAGGGGTCTCCTAGTTCAAAGGAGATGTACTCCGGGCTTGTTACGACCT  
+  
FFFFFFFFFFF:,FFFFFFFFF,FFFFFFFFFFFFFFFFFFFF,FFFFFFFFFFFFFFFFFFFFFFFFFFFFFFFFFFFFF:FFFFFFF  
FFFFFFFFF:FFFFFFFFFFFFFFFFFFFF:FFFFFFFFFFFFF:F::FFFFFFFFFFFF:FFFFFFF  
@A00155:342:HHGFNDSXY:1:1451:23647:35149 1:N:0:GAACCTAG+TCCGCATA  
CTCTGGCCTATGGTCATCTCAATGCCGAGAGGGATGTGGAGGGCGAGAGAGAGCGACTTCTCTCGGGC  
CCACAGCCTTACAGCTGTGGAGCACGGTATCCTCTGCCGAAACAGAGGTTGGACAAGACCGGAGGGGT  
+  
FFFFFFFFFFFFFFFFFFFFFFFFFFFFFFFFFFFFFFFFFFFFFFFFFFFFFFFFFFFFF:FFFFFFFFFFFFFFFFFFFFFFFFFFFFFFFFFFFFF  
FFFFFFFFFFFFFFFFFFFFFFFFFFFFFFFFFFFFFFFFFFFFFFFFFFFFFFFFFFFFFFFFFFFFFFFFFFFFFFFFFFFFFFFFFFFFFFFFFFFFF  
@A00155:342:HHGFNDSXY:1:1452:30418:1031 1:N:0:GAACCTAG+TCCGCATA  
AGGGATGTGGAGGGCGAGAGAGAGCGACTTCTCTCGGGCCACAGCCTTACAGCTGTGGAGCACGGTA  
TCCTCTGCCGAAACAGAGGTTGGACAAGACCGGAGGGGTCTCCTAGTTCAAAGGAGATGTACTCCGG  
+  
FFFFFFFFFFFFFFFFFFFFFFFFFFFFFFFFFFFFFFFFFFFFFFFFFFFFFFFFFFFFFFFFFFFFFFFFFFFFFFFFFFFFFFFFFFFFFFFFFFFFF  
FFFFFFFFFFFFFFFFFFFFFFFFFFFFFFFFFFFFFFFFFFFFFFFFFFFFFFFFFFFFFFFFFFFFFFFFFFFFFFFFFFFFFFFFFFFFFFFFFFFFF  
@A00155:342:HHGFNDSXY:1:1452:7609:31172 1:N:0:GAACCTAG+TCCGCATA  
CAAGCCCGGAGTACATCTCCTTTGGAAGTAGGAGACCCCTCCGGTCTTGCCAACCTCTGTTTTCGGCA  
GAGGATACCGTGCTCCACAGCTGTAAGGCTGTGGGCCCGAGAGAAGTCGCTCTCTCTCGCCCTCCACA  
+  
FFFFFFFFFFFFFFFFFFFFFFFFFFFFFFFFFFFFFFFFFFFFFFFFFFFFFFFFFFFFFFFFFFFFFFFFFFFFFFFFFFFFFFFFFFFFFFFFFFFFF  
FFFFFFFFFFFFFFFFFFFFFFFFFFFFFFFFFFFFFFFFFFFFFFFFFFFFFFFFFFFFFFFFFFFFFFFFFFFFFFFFFFFFFFFFFFFFFFFFFFFFF  
@A00155:342:HHGFNDSXY:1:1452:7581:31187 1:N:0:GAACCTAG+TCCGCATA  
CAAGCCCGGAGTACATCTCCTTTGGAAGTAGGAGACCCCTCCGGTCTTGCCAACCTCTGTTTTCGGCA  
GAGGATACCGTGCTCCACAGCTGTAAGGCTGTGGGCCCGAGAGAAGTCGCTCTCTCTCGCCCTCCACA  
+  
FFFFFFFFFFFFFFFFFFFFFFFFFFFFFFFFFFFFFFFFFFFFFFFFFFFFFFFFFFFFFFFFFFFFFFFFFFFFFFFFFFFFFFFFFFFFFFFFFFFFF  
F:FFFFFFFFFFFFFFFFFFFFFFFFFFFFFFFFFFFFFFFFFFFFFFFFFFFFFFFFFFFFFFFFFFFFFFFFFFFFFFFFFFFFFFFFFFFFFFFFFFFFF  
@A00155:342:HHGFNDSXY:1:1453:30029:1047 1:N:0:GAACCTAG+TCCGCATA  
TGGTCATCTCAATGCCGAGAGGGATGTGGAGGGCGAGAGAGAGCGACTTCTCTCGGGCCCACAGCCTT  
ACAGCTGTGGAGCACGGTATCCTCTGCCGAAACAGAGGTTGGACAAGACCGGAGGGGTCTCCTAGTTC  
+  
FFFFFFFFFFFFFFFFFFFFFFFFFFFFFFFFFFFFFFFFFFFFFFFFFFFFFFFFFFFFFFFFFFFFFFFFFFFFFFFFFFFFFFFFFFFFFFFFFFFFF  
FFFFFFFFFFFFFFFFFFFFFFFFFFFFFFFFFFFFFFFFFFFFFFFFFFFFFFFFFFFFFFFFFFFFFFFFFFFFFFFFFFFFFFFFFFFFFFFFFFFFF  
@A00155:342:HHGFNDSXY:1:1453:15176:11271 1:N:0:GAACCTAG+TCCGCATA  
AGAGAGAGCGACTTCTCTCGGGCCACAGCCTTACAGCTGTGGAGCACGGTATCCTCTGCCGAAACAG  
AGGTTGGACAAGACCGGAGGGGTCTCCTAGTTCAAAGGAGATGTACTCCGGGCTTGTTACGAC  
+  
FFFFFFFFFFFFFFFFFFFFFFFFFFFFFFFFFFFFFFFFFFFFFFFFFFFFFFFFFFFFFFFFFFFFFFFFFFFFFFFFFFFFFFFFFFFFFFFFFFFFF  
FFFFFFFFFFFFFFFFFFFFFFFFFFFFFFFFFFFFFFFFFFFFFFFFFFFFFFFFFFFFFFFFFFFFFFFFFFFFFFFFFFFFFFFFFFFFFFFFFFFFF  
@A00155:342:HHGFNDSXY:1:1453:17571:12164 1:N:0:GAACCTAG+TCCGCATA  
GGATGTGGAGGGCGAGAGAGAGCGACTTCTCTCGGGCCCACAGCCTTACAGCTGTGGAGCACGGTATC

CTCTGCCGAAACAGAGGTTGGACAAGACCGGAGGGGTCTCCTAGTTCCAAAGGAGATGTACTCC  
+  
FFFFFFFFFFFFFFFFFFFFFFFFFFFFFFFFFFFFFFFFFFFFFFFFFFFFFFFFFFFFFFFFFFFFFFFF  
FFFFFFFFFFFFFF:FFFFFFFFFFFFFFFFFFFFFFFFFFFFFFFFFFFFFFFFFFFFFFFFFFFFFFFF  
@A00155:342:HHGFNDSXY:1:1453:24135:21966 1:N:0:GAACCTAG+TCCGCATA  
TCCTCTGCCGAAACAGAGGTTGGACAAGACCGGAGGGGTCTCCTAGTTCCAAAGGAGATGTACTCCGG  
GCTTGTTACGACCTACCGTGTAAGTCGTAGTCTAGTAGGCTACCTGACGAGTCCTTTTAGGACGAA  
+  
FFFFFFFFFFFFFFFFFFFFFFFFFFFFFFFFFFFFFFFFFFFFFFFFFFFFFFFFFFFFFFFFFFFFFFFF  
FFFFFFFFFFFFFFFFFFFFFFFFFFFFFFFFFFFFFFFFFFFFFFFFFFFFFFFFFFFFFFFFFFFFFFFF  
@A00155:342:HHGFNDSXY:1:1454:5086:22044 1:N:0:GAACCTAG+TCCGCATA  
CTCCTCTGGCCTATGGTCATCTCAATGCCGAGAGGGATGTGGAGGGCGAGAGAGAGCGACTTCTCTCG  
GGCCACAGCCTTACAGCTGTGGAGCACGGTATCCTCTGCCGAAACAGAGGTTGGACAAGACCGGAGG  
+  
FFFFFFFFFFFFFFFFFFFFFFFFFFFFFFFFFFFFFFFFFFFFFFFFFFFFFFFFFFFFFFFFFFFFFFFF  
FFFFFFFFFFFFFFFFFFFFFFFFFFFFFFFFFFFFFFFFFFFFFFFFFFFFFFFFFFFFFFFFFFFFFFFF  
@A00155:342:HHGFNDSXY:1:1454:10926:34256 1:N:0:GAACCTAG+TCCGCATA  
GAGAAGGATGTGGAGGGCGAGAGAGAGCGACTTCTCTCGGGCCACAGCCTTACAGCTGTGGAGCACG  
GTATCCTCTGCCGAAACAGAGGTTGGACAAGACCGGAGGGGTCTCCTAGTTCCAAAGGAGATGTACTC  
+  
FFFFFFFFFFFFFFFFFFFFFFFFFFFFFFFFFFFFFFFFFFFFFFFFFFFFFFFFFFFFFFFFFFFFFFFF  
FFFFFFFFFFFFFFFFFFFFFFFFFFFFFFFFFFFFFFFFFFFFFFFFFFFFFFFFFFFFFFFFFFFFFFFF  
@A00155:342:HHGFNDSXY:1:1454:28122:36104 1:N:0:GAACCTAG+TCCGCATA  
TTCTCTCGGGCCACAGCCTTACAGCTGTGGAGCACGGTATCCTCTGCCGAAACAGAGGTTGGACAAG  
ACCGGAGGGGTCTCCTAGTTCCAAAGGAGATGTACTCCGGGCTTGTTACGACCTACCGTGTAAGTCG  
+  
FFFFFFFFFFFFFFFFFFFFFFFFFFFFFFFFFFFFFFFFFFFFFFFFFFFFFFFFFFFFFFFFFFFFFFFF  
FFFFFFFFFFFFFFFFFFFFFFFFFFFFFFFFFFFFFFFFFFFFFFFFFFFFFFFFFFFFFFFFFFFFFFFF  
@A00155:342:HHGFNDSXY:1:1455:28592:7858 1:N:0:GAACCTAG+TCCGCATA  
CAGCTGTGGAGCACGGTATCCTCTGCCGAAACAGAGGTTGGACAAGACCGGAGGGGTCTCCTGGTTCC  
AAAGGAGATGTACTCCGGGCTTGTTACGACCTACCGTGTAAGTCGTAGTCTAGTAGGCTACCTGACG  
+  
FFFFFFFFFFFFFFFFFFFFFFFFFFFFFFFFFFFFFFFFFFFFFFFFFFFFFFFFFFFFFFFFFFFFFFFF  
FFFFFFFFFFFFFFFFFFFFFFFFFFFFFFFFFFFFFFFFFFFFFFFFFFFFFFFFFFFFFFFFFFFFFFFF  
@A00155:342:HHGFNDSXY:1:1455:6424:18411 1:N:0:GAACCTAG+TCCGCATA  
GTCATCTCAATGCCGAGAGGGATGTAGAGGGCGAGAGAGAGCGACTTCTCTCGGGCCACAGCCTTAC  
AGCTGTGGAGCACGGTATCCTCTGCCGAAACAGAGGTTGGACAAGACCGGAGGGGTCTCCTAGTTCCA  
+  
FFFFFFFFFFFFFFFFFFFFFFFFFFFFFFFFFFFFFFFFFFFFFFFFFFFFFFFFFFFFFFFFFFFFFFFF  
FFFFFFFFFFFFFFFFFFFFFFFFFFFFFFFFFFFFFFFFFFFFFFFFFFFFFFFFFFFFFFFFFFFFFFFF  
@A00155:342:HHGFNDSXY:1:1455:14705:25144 1:N:0:GAACCTAG+TCCGCATA  
AGAGAGAGCGACTTCTCTCGGGCCACAGCCTTACAGCTGTGGAGCACGGTATCCTCTGCCGAAACAG  
AGGTTGGACAAGACCGGAGGGGTCTCCTAGTTCCAAAGGAGATGTACTCCGGGCTTGTTACGACCTA  
+  
FFFFFFFFFFFFFFFFFFFFFFFFFFFFFFFFFFFFFFFFFFFFFFFFFFFFFFFFFFFFFFFFFFFFFFFF  
FFFFFFFFFFFFFFFFFFFFFFFFFFFFFFFFFFFFFFFFFFFFFFFFFFFFFFFFFFFFFFFFFFFFFFFF  
@A00155:342:HHGFNDSXY:1:1455:10339:26819 1:N:0:GAACCTAG+TCCGCATA  
TTAGATCAGCTGTGTCCACTTAAGGACTCACCTCTGGCCTATGGTCATCTCAATGCCGAGAGGGATGT  
GGAGGGCGAGAGAGAGCGACTTCTCTCGGGCCACAGCCTTACAGCTGTGGAGCACGGTATCCTCTGC  
+  
FFFFFFFFFFFFFFFFFFFFFFFFFFFFFFFFFFFFFFFFFFFFFFFFFFFFFFFFFFFFFFFFFFFFFFFF  
FFFFFFFFFFFFFFFFFFFFFFFFFFFFFFFFFFFFFFFFFFFFFFFFFFFFFFFFFFFFFFFFFFFFFFFF  
@A00155:342:HHGFNDSXY:1:1455:23267:33927 1:N:0:GAACCTAG+TCCGCATA  
TTACAGCTGTGGAGCACGGTATCCTCTGCCGAAACAGAGGTTGGACAAGACCGGAGGGGTCTCCTAGT



TCCAAAGGAGATGTACTCCGGGCTTGTTACGACCTACCGTGTAAGTCGTAGTCTAGTAGGCTACCTG  
+  
:FFFFFFFFFFFFFFFFFFFFFFFFFFFFFFFFFFFFFFFFFFFFFFFFFFFFFFFFFFFFFFFFFFFFFFFF  
FFFFFFFFFFFFFFFFFFFFFFFFFFFFFFFFFFFFFFFFFFFFFFFFFFFFFFFFFFFFFFFFFFFFFFFF  
@A00155:342:HHGFNDSXY:1:1456:10601:14465 1:N:0:GAACCTAG+TCCGCATA  
ACTTCTCTCGGGCCACAGCCTTACTGCTGTGGAGCACGGTATCCTCTGCCGAAACAGAGGTTGGACA  
AGACCGGAGGGGTCTCCTAGTTCCAAAGGAGATGTACTCCGGGCTTGTTACGACCTACCGTGTAAGT  
+  
FFFFFFFFFFFFFFFFFFFFFFFFFFFFFFFFFFFFFFFFFFFFFFFFFFFFFFFFFFFFFFFFFFFFFFFF  
FFFFFFFFFFFFFFFFFFFFFFFFFFFFFFFFFFFFFFFFFFFFFFFFFFFFFFFFFFFFFFFFFFFFFFFF  
@A00155:342:HHGFNDSXY:1:1457:19922:8155 1:N:0:GAACCTAG+TCCGCATA  
ATCTCAATGCCGAGAGGGATGTAGAGGGCGAGAGAGAGCGACTTCTCTCGGGCCACAGCCTTACAGC  
TGTGGAGCACGGTATCCTCTGCCGAAACAGAGGTTGGACAAGACCGGAGGGGTCTCCTAGTTCCAAAG  
+  
FFFFFFFFFFFFFFFFFFFF,FFFFFFFFFFFFFFFFFFFFFFFFFFFFFFFFFFFFFFFFFFFFFFFFFFFF  
FFFFFFFFFFFFFFFFFFFFFFFFFFFFFFFFFFFFFFFFFFFFFFFFFFFFFFFFFFFFFFFFFFFFFFFF:F  
@A00155:342:HHGFNDSXY:1:1457:17481:13228 1:N:0:GAACCTAG+TCCGCATA  
ACCTCTGTTTCGGCAGAGGATACCGTGCTCCACAGCTGTAAGGCTGTGGGCCCGAGAGAAGTCGCTCT  
CTCTCGCCCTCCACATCCCTCTCGGCATTGAGATGACCATAGGCCAGAGGAGAGTCCTTAAGTGGACA  
+  
FFFFFFFFFFFFFFFFFFFFFFFFFFFFFFFFFFFFFFFFFFFFFFFFFFFFFFFFFFFFFFFFFFFFFFFF  
FFFFFFFFFFFFFFFFFFFFFFFFFFFFFFFFFFFFFFFFFFFFFFFFFFFFFFFFFFFFFFFFFFFFFFFF:FFFF  
@A00155:342:HHGFNDSXY:1:1457:27796:25927 1:N:0:GAACCTAG+TCCGCATA  
CACCTCTGGCCTATGGTCATCTCAATGCCGAGAGGGATGTGAAGGGCGAGAGAGAGCGACTTCTCTCG  
GGCCACAGCCTTACAGCTGTGGAGCACGGTATCCTCTGCCGAAACAGAGGTTGGACAAGACCGGAG  
+  
FFFFFFFFFFFFFFFF:F:FFFFFFFFFFFFFFFFFFFFFFFFFFFFFFFFFFFFFFFFFFFFFFFFFFFF  
FFFFFFFFFFFFFFFFFFFFFFFFFFFFFFFFFFFFFFFFFFFFFFFFFFFFFFFFFFFFFFFFFFFFFFFF:FFFFF  
@A00155:342:HHGFNDSXY:1:1458:1289:14215 1:N:0:GAACCTAG+TCCGCATA  
TTAAGGACTCTCCTCTGGCCTATGGTCATCTCAATGCCGAGAGGGATGTGGAGGGCGAGAGAGAGCGA  
CTTCTCTCGGGCCACAGCCTTACAGCTGTGGAGCACGGTATCCTCTGCCGAAACAGAGGTTGGACAA  
+  
FFFFFF:FFFFFFFFFFFF:FFFFFFFFFFFFFFFFFFFFFFFFFFFFFFFFFFFFFFFFFFFFFFFFFFFF  
FFFFFFFFFFFFFFFFFFFFFFFFFFFFFFFFFFFFFFFFFFFFFFFFFFFFFFFFFFFFFFFFFFFFFFFF:FFFFF:FFFF:F  
@A00155:342:HHGFNDSXY:1:1458:10637:28087 1:N:0:GAACCTAG+TCCGCATA  
TTCTCTCGGGCCACAGCCTTACAGCTGTGGAGCACGGTATCCTCTGCCGAAACAGAGGTTGGACAAG  
ACCGGAGGGGTCTCCTAGTTCCAAAGGAGATGTACTCCGGGCTTGTTACGACCTACCGTGTAAGTCG  
+  
FFFFFFFFFFFFFFFFFFFFFFFFFFFFFFFFFFFFFFFFFFFFFFFFFFFFFFFFFFFFFFFFFFFFFFFF  
FFFFFFFFFFFFFFFFFFFFFFFFFFFFFFFFFFFFFFFFFFFFFFFFFFFFFFFFFFFFFFFFFFFFFFFF:FFFFFFFFFFFFFFFFFFFF  
@A00155:342:HHGFNDSXY:1:1458:25852:33614 1:N:0:GAACCTAG+TCCGCATA  
TTACAGCTGTGGAGCACGGTATCCTCTGCCGAAACAGATGTTGGACAAGACCGGAGGGGTCTCCTAGT  
TCCAAAGGAGATGTACTCCGGGCTTGTTACGACCTACCGTGTAAGTCGTAGTCTAGTAGGCTACCT  
+  
F,FFFFFFFF::FFFFFFFF:FFFFFFFF,,:FFFF:FF,FFFF:FFF:F:FFFFFF,:  
FFFF:FFFFFF,FF,,FF,F:FF,,,FFFF:FFF:FFF:F:FFF:FFFFFFFFF::FF,:FF  
@A00155:342:HHGFNDSXY:1:1459:3613:13823 1:N:0:GAACCTAG+TCCGCATA  
ATCCTCTGCCGAAACAGAGGTTGGACAAGACCGGAGGGGTCTCCTGGTTCCAAAGGAGATGTACTCCG  
GGCTTGTTACGACCTACCGTGTAAGTCGTAGTCTAGTAGGCTACCTGACGAGTCCTTTTTAGGACGA  
+  
FFFFFFFFFFFFFFFFFFFFFFFFFFFFFFFFFFFFFFFFFFFFFFFFFFFFFFFFFFFFFFFFFFFFFFFF  
FFFFFFFFFFFFFFFFFFFFFFFFFFFFFFFFFFFFFFFFFFFFFFFFFFFFFFFFFFFFFFFFFFFFFFFF,:FFFFFFFFFFFFFFFFFFFF  
@A00155:342:HHGFNDSXY:1:1459:6813:15327 1:N:0:GAACCTAG+TCCGCATA  
TGTCCACTTAAGGACTCACCTCTGGCCTATGGTCATCTCAATGCCGAGAGGGATGTAGAGGGCGAGAG

AGAGCGACTTCTCTCGGGCCCACAGCCTTACAGCTGTGGAGCACGGTATCCTCTGCCGAAACAGAGGT  
+  
FFFFFFFF:FFFFFFFFFFFFFFFFFFFFFFFFFFFFFFFFFFFFFFFFFFFFFFFFFFFFFFFFFFFFFFFF:FFF:FFFFFFFF  
FFFFFFFFFFFFFFFFFFFFFFFFFFFFFFFFFFFFFFFFFFFFFFFFFFFFFFFFFFFFFFFFFFFFFFFF:FFFF  
@A00155:342:HHGFNDSXY:1:1459:16857:26616 1:N:0:GAACCTAG+TCCGCATA  
TATGGAGGGCGAGAGAGAGCGACTTCTCTCGGGCCCACAGCCTTACAGCTGTGGAGCACGGTATCCTC  
TGCCGAAACAGAGGTTGGACAAGACCGGAGGGGTCTCCTAGTTCAAAGGAGATGTACTCCGGG  
+  
:FFFFFFFFFFFFFFFFFFFFFFFFFFFFFFFFFFFFFFFFFFFFFFFFFFFFFFFFFFFFFFFF:FFFF,FFFF  
FFFFFFFFFFFFFFFFFFFFFFFFFFFFFFFFFFFFFFFFFFFFFFFFFFFFFFFFFFFFFFFFFFFFFFFF  
@A00155:342:HHGFNDSXY:1:1459:12391:28902 1:N:0:GAACCTAG+TCCGCATA  
ATCTCAATGCCGAGAGGGATGTGGAGGGCGAGAGAGAGCGACTTCTCTCGGGCCCACAGCCTTACAGC  
TGTGGAGCACGGTATCCTCTGCCGAAACAGAGGTTGGACAAGACCGGAGGGGTCTCCTAGTTCAAAG  
+  
FFFFFFFFFFFFFFFFFFFFFFFFFFFFFFFFFFFFFFFFFFFFFFFFFFFFFFFFFFFFFFFFFFFFFFFF  
FFFFFFFFFFFFFFFFFFFFFFFFFFFFFFFFFFFFFFFFFFFFFFFFFFFFFFFFFFFFFFFFFFFFFFFF  
@A00155:342:HHGFNDSXY:1:1459:5918:31626 1:N:0:GAACCTAG+TCCGCATA  
CTGTGTCCACTTAAGGACTCACCTCTGGCCTATGGTCATCTCAATGCCGAGAGGGATGTGGAGGGCGA  
GAGAGAGCGACTTCTCTCGGGCCCACAGCCTTACAGCTGTGGAGCACGGTATCCTCTGCCGAAACAGA  
+  
F:,FF:FFFF::FF:FFF:FFFFFFFFFFFFFFFFFFFFFFFFFFFFFFFF:FF:FF:FFFFFFFF,::FFFFFFFF  
FF:FFFFFFFFFFFFFFFFFFFFFFFFFFFFFFFFFFFFFFFF:FFFFFFFF:FF::F:FFFFFFFF  
@A00155:342:HHGFNDSXY:1:1460:21603:2832 1:N:0:GAACCTAG+TCCGCATA  
ACCTCTGGCCTATGGTCATCTCAATGCCGAGAGGGATGTGGAGGGCGAGAGAGAGCGACTTCTCTCG  
GCCACAGCCTTACAGCTGTGGAGCACGGTATCCTCTGCCGAAACAGAGGTTGGACAAGAC  
+  
FFFFFFFFFFFFFFFFFFFFFFFFFFFFFFFFFFFFFFFFFFFFFFFFFFFFFFFFFFFFFFFFFFFFFFFF  
FFFFFFFFFFFFFFFFFFFFFFFFFFFFFFFFFFFFFFFFFFFFFFFFFFFFFFFFFFFFFFFFFFFFFFFF  
@A00155:342:HHGFNDSXY:1:1460:20645:32800 1:N:0:GAACCTAG+TCCGCATA  
GGCGAGAGAGAGCGACTTCTCTCGGGCCCACAGCCTTACAGCTGTGGAGCACGGTATCCTCTGCCGAA  
ACAGAGGTTGGACAAGACCGGAGGGGTCTCCTAGTTCAAAGGAGATGTACTCCGGGCTTGTTACGA  
+  
FFFFFFFFFFFFFFFFFFFFFFFFFFFFFFFFFFFFFFFFFFFFFFFFFFFFFFFFFFFFFFFFFFFFFFFF  
FFFFFFFFFFFFFFFFFFFFFFFFFFFFFFFFFFFFFFFFFFFFFFFFFFFFFFFFFFFFFFFFFFFFFFFF  
@A00155:342:HHGFNDSXY:1:1461:1371:11443 1:N:0:GAACCTAG+TCCGCATA  
GGCAGAGGATACCGTGCTCCACAGCTGTAAGGCTGTGGGCCGAGAGAAGTCGCTCTCTCTCGCCCTT  
CACATCCCTCTCGGCATTGAGATGACCATAGGCCAGAGGTGAGTCCTTAAGTGGACACAGCTGA  
+  
FFFFFFFFFFF,FFFFFFFFFFFFFFFFFFFFFFFFFFFFFFFF:FFFFFFFFFFFFFFFFFFFFFFFFFFFFFFFF  
FFFFFFFFFFFFFFFFFFFFFFFFFFFFFFFF:FFFFFFFFFFFFFFFFFFFFFFFFFFFFFFFFFFFFFFFF  
@A00155:342:HHGFNDSXY:1:1461:7997:19382 1:N:0:GAACCTAG+TCCGCATA  
GGGCGAGAGAGAGCGACTTCTCTCGGGCCCACAGCCTTACAGCTGTGGAGCACGGTATCCTCTGCCGA  
AACAGAGGTTGGACAAGACCGGAGGGGTCTCCTAGTTCAAAGGAGATGTACTCCGGGCTTGTTACG  
+  
FFFFFFFFFFFFFFFFFFFFFFFFFFFFFFFFFFFFFFFF:FFFFFFFF:FFFFFFFFFFFFFFFFFFFFFFFF  
FFFFFFFFFFFFFFFFFFFFFFFFFFFFFFFF:FFFFFFFFFFFFFFFFFFFFFFFFFFFFFFFFFFFFFFFF:  
@A00155:342:HHGFNDSXY:1:1461:19732:22514 1:N:0:GAACCTAG+TCCGCATA  
CCTCTGGCCTATGGTCATCTCAATGCCGAGAGGGATGTGAAGGGCGAGAGAGAGCGACTTCTCTCGGG  
CCCACAGCCTTACAGCTGTGGAGCACGGTATCCTCTGCCGAAACAGAGGTTGGACAAGAC  
+  
FFFFFFFFFFFFFFFFFFFFFFFFFFFFFFFFFFFFFFFFFFFFFFFFFFFFFFFFFFFFFFFFFFFFFFFF  
FFFFFFFFFFFFFFFFFFFFFFFFFFFFFFFFFFFFFFFFFFFFFFFFFFFFFFFFFFFFFFFFFFFFFFFF  
@A00155:342:HHGFNDSXY:1:1461:10511:24079 1:N:0:GAACCTAG+TCCGCATA  
GGGCGAGAGAGAGCGACTTCTCTCGGGCCCACAGCCTTACAGCTGTGGAGCACGGTATCCTCTGCCGA

AACAGAGGTTGGACAAGACCGGAGGGGTCTCCTAGTTCCAAAGGAGATGTACTCCGGGCTTGTTACAG  
+  
FFFFFFFFFFFFFFFFFFFFFFFFFFFFFFFFFFFFFFFFFFFFFFFFFFFFFFFFFFFFFFFFFFFFFFFF:FFFFFFFFFFFFFFFF  
FFFFFFFFFFFFFFFFFFFFFFFFFFFFFFFFFFFFFFFFFFFFFFFFFFFFFFFFFFFFFFFFFFFFFFFFFFFFFFFF  
@A00155:342:HHGFNDSXY:1:1461:31060:31767 1:N:0:GAACCTAG+TCCGCATA  
GCGACTTCTCTCGGGCCACAGCCTTACAGCTGTGGAGCACGGTATCCTCTGCCGAAACAGAGGTTGG  
ACAAGACCGGAGGGGTCTCCTAGTTCCAAAGGAGATGTACTCCGGGCTTGTTACGACCTACCGAGT  
+  
F,:FF,FF:FF,FF,FFFFFFFF,FFFF,FF::F,FFFFFF:FF:::FFFF,,FFFFFFFF,FF,F,  
FFFFFF,F,FFFFFFFFFFFFFFFF,:FFFFFF,F,FFFFFFFF,FFFF:::FFFF:FFFFFFFF:F,FF  
@A00155:342:HHGFNDSXY:1:1462:4679:3458 1:N:0:GAACCTAG+TCCGCATA  
TATCCTCTGCCGAAACAGAGGTTGGACAAGACCGGAGGGGTCTCCTAGTTCCAAAGGAGATGTACTCC  
GGGCTTGTTACGACCTACCGTGTAAAGTCGTAGTCTAGTAGGCTACCTGACGAGTCCTTTTATAGGAC  
+  
FFFFFFFFFFFFFFFFFFFFFFFFFFFFFFFFFFFFFFFFFFFFFFFFFFFFFFFFFFFFFFFFFFFFFFFF:FFFFFFFF:FFFFFFFFFFFFFFFFFFFFFFFFFFFFFFFF  
FFFFFFFFFFFFFFFFFFFFFFFFFFFFFFFFFFFFFFFFFFFFFFFFFFFFFFFFFFFFFFFFFFFFFFFF,FFFFFFFFFFFFFFFFFFFFFFFF:FF  
@A00155:342:HHGFNDSXY:1:1463:5593:1877 1:N:0:GAACCTAG+TCCGCATA  
ATCCTCTGCCGAAACAGAGGTTGGACAAGGCCGGAGGGGTCTCCTAGTTCCAAAGGAGATGTACTCCG  
GGCTTGTTACGACCTACCGTGTAAAGTCGTAGTCTAGTAGGCTACCTGACGAGTCCTTTTATAGGACGA  
+  
FFFFFFFFFFFFFFFFFFFFFFFFFFFFFFFFFFFFFFFF,FFFFFFFFFFFFFFFFFFFFFFFFFFFFFFFFFFFFFFFFFFFFFFFFFFFFFFFF  
FFFFFFFFFFFFFFFFFFFFFFFFFFFFFFFFFFFFFFFF:FFFFFFFFFFFFFFFFFFFFFFFF:FFFFFFFFFFFFFFFFFFFFFFFF  
@A00155:342:HHGFNDSXY:1:1463:2058:5462 1:N:0:GAACCTAG+TCCGCATA  
GAGAGGGATATGGAGGGCGAGAGAGAGCGACTTCTCTCGGGCCACAGCCTTACAGCTGTGGAGCACG  
GTATCCTCTGCCGAAACAGAGGTTGGACAAGACCGGAGGGGTCTCCTAGTTCCAAAGGAGATGTACTC  
+  
FFFFFFFFFFFFFFFFFFFFFFFF,FFFFFFFFFFFFFFFFFFFFFFFFFFFFFFFF:FFFFF:FF,FFFFFFFFFFFFFFFFFFFFFFFF:  
FFFFFFFFFFFFFFFF:F:FFFFFFFFFFFFFFFFFFFFFFFFFFFFFFFF,FFFFFFFFFFFFFFFFFFFFFFFFFFFFFFFF  
@A00155:342:HHGFNDSXY:1:1464:29107:4272 1:N:0:GAACCTAG+TCCGCATA  
GAGAGAGCGACTTCTCTCGGGCCACAGCCTTACAGCTGTGGAGCACGGTATCCTCTGCCGAAACAGA  
GGTTGGACAAGACCGGAGGGGTCTCCTGGTTCCAAAGGAGATGTACTCCGGGCTTGTTACGACCTAC  
+  
FFFFFFFFFFFFFFFFFFFFFFFFFFFFFFFFFFFFFFFFFFFFFFFFFFFFFFFFFFFFFFFFFFFFFFFFFFFFFFFFFFFFFFFF  
FFFFFFFFFFFFFFFFFFFFFFFFFFFFFFFFFFFFFFFFFFFFFFFFFFFFFFFFFFFFFFFFFFFFFFFFFFFFFFFF:FF  
@A00155:342:HHGFNDSXY:1:1464:7346:33943 1:N:0:GAACCTAG+TCCGCATA  
GCGACTTCTCTCGGGCCACAGCCTTACATCTGTGGAGCACGGTATCCTCTGCCGAAACAGAGGTTGG  
ACAAGACCGGAGGGGTCTCCTAGTTCCAAAGGAGATGTACTCCGGGCTTGTTACGACCTACCGTGT  
+  
FFFFFFFFFFFFFFFFFFFFFFFFFFFFFFFFFFFFFFFFFFFFFFFFFFFFFFFFFFFFFFFFFFFFFFFFFFFFFFFF  
FFFF,FFFFFFFFFFFFFFFFFFFFFFFFFFFFFFFFFFFFFFFFFFFFFFFFFFFFFFFFFFFFFFFFFFFFFFFF  
@A00155:342:HHGFNDSXY:1:1464:28103:36198 1:N:0:GAACCTAG+TCCGCATA  
TGGTCATCTCTATGCCGAGAGGGATGTGGAGGGCGAGAGAGAGCGACTTCTCTCGGGCCACAGCCTT  
ACAGCTGTGGAGCACGGTATCCTCTGCCGAAACAGAGGTTGGACAAGACCGGAGGGGTCTCCTAGTTC  
+  
FFFFFFFFFFFFFFFFFFFFFFFFFFFFFFFFFFFFFFFFFFFFFFFFFFFFFFFFFFFFFFFFFFFFFFFFFFFFFFFF  
FFFFFFFFFFFFFFFFFFFFFFFFFFFFFFFFFFFFFFFFFFFFFFFFFFFFFFFFFFFFFFFFFFFFFFFFFFFFFFFF  
@A00155:342:HHGFNDSXY:1:1465:25825:11334 1:N:0:GAACCTAG+TCCGCATA  
CTTCTCTCGGGCCACAGCCTTACAGCTGTGGAGCACGGTATCCTCTGCCGAAACAGAGGTTGGACAA  
GACCGGAGGGGTCTCCTAGTTCCAAAGGAGATGTACTCCGGGCTTGTTACGACCTACCGTGTAAAGTC  
+  
FFFFFFFFFFFFFFFFFFFFFFFFFFFFFFFFFFFFFFFFFFFFFFFFFFFFFFFFFFFFFFFFFFFFFFFFFFFFFFFF  
FFFFFFFFFFFFFFFFFFFFFFFFFFFFFFFFFFFFFFFFFFFFFFFFFFFFFFFFFFFFFFFFFFFFFFFFFFFFFFFF  
@A00155:342:HHGFNDSXY:1:1465:14904:12900 1:N:0:GAACCTAG+TCCGCATA  
CTTCTCTCGGGCCACAGCCTTACAGCTGTGGAGCACGGTATCCTCTGCCGAAACAGAGGTTGGACAA

GACCGGAGGGGTCTCCTAGTTCCAAAGGAGATGTACTCCGGGCTTGTTACGACCTACCGTGTAAGTC  
+  
FF:FFFFFFFFFFFFFFFFFFFFFFFF:FFFFFFFF:FFFFFFFFFFFFFFFFFFFFFFFFFFFFFFFFFFFFFFFF,FFFF  
FFFF:FFFFFFFFFFFFFFFFFFFFFFFFFFFFFFFF:FFFFFFFFFFFFFFFFFFFFFFFFFFFFFFFFFFFFFFFF,FFFFFFF  
@A00155:342:HHGFNDSXY:1:1465:29713:15906 1:N:0:GAACCTAG+TCCGCATA  
CTTCTCTCGGGCCCACAGCCTTACAGCTGTGGAGCACGGTATCCTCTGCCGAAACAGAGGTTGGACAA  
GACCGGAGGGGTCTCCTAGTTCCAAAGGAGATGTACTCCGGGCTTGTTACGACCTACCGTGTAAGTC  
+  
FFF:FFFFFFFF:FFFFF:FFFFFFFFFFFFFFFFFFFF::FFF,FFF:FFF,FFFFFFFFFFFFFFFFFFFF  
FFFFFFFFFFFFFFFFFFFFFFFFFFFFFFFFFFFFFFFFFFFFFFFFFFFFFFFF:FFFF:FFF:FFFFFFFFF:F:F,:FF  
@A00155:342:HHGFNDSXY:1:1465:30364:21731 1:N:0:GAACCTAG+TCCGCATA  
CTCAATGCCGAGAGGGATGTGGAGGGCGAGAGAGAGCGACTTCTCTCGGGCCCACAGCCTTACAGCTG  
TGGAGCACGGTATCCTCTGCCGAAACAGAGGTTGGACAAGACCGGAGGGGTCTCCTAGTTCCAAAGGA  
+  
FFFFFFFFFFFFFFFFFFFFFFFF:FFFFFFFFFFFFFFFFFFFFFFFFFFFFFFFFFFFFFFFFFFFFFFFFFFFF  
FFFFFFFFFFFFFFFFFFFFFFFFFFFFFFFFFFFFFFFFFFFFFFFFFFFFFFFF:FFF:FFFFFFFFFFFFFFFFFFFF  
@A00155:342:HHGFNDSXY:1:1465:16242:27868 1:N:0:GAACCTAG+TCCGCATA  
CCTCTGGCCTATGGTCATCTCAATGCCGAGAGGGATGTGGAGGGCGAGAGAGAGCGACTTCTCTCGGG  
CCCACAGCCTTACAGCTGTGGAGCACGGTATCCTCTGCCGAAACAGAGGTTGGACAAGACCGGAGGGG  
+  
FFFFFFFFFFFFFFFFFFFFFFFFFFFFFFFF:FFFF:FFFFFFFFFFFFFFFFFFFF:F:FFFF:FFFF  
FFFFFFFFFFFFFFFFFFFFFFFFFFFFFFFFFFFFFFFFFFFFFFFFFFFFFFFFFFFFFFFFFFFFFFFFFFFF  
@A00155:342:HHGFNDSXY:1:1465:22128:31485 1:N:0:GAACCTAG+TCCGCATA  
TTCTCTCGGGCCCACAGCCTTACAGCTGTGGAGCACGGTATCCTCTGCCGAAACAGAGGTTGGACAAG  
ACCGGAGGGGTCTCCTAGTTCCAAAGGAGATGTACTCCGGGCTAGTTACGACCTACCGTGTAAGTCG  
+  
FFFFFFFFFFFFFFFFFFFFFFFFFFFFFFFFFFFFFFFFFFFFFFFFFFFFFFFFFFFFFFFFFFFFFFFFFFFF  
FFFFFFFFFFFFFFFFFFFFFFFFFFFFFFFFFFFFFFFFFFFFFFFFFFFFFFFFFFFFFFFFFFFFFFFFFFFF:FFFFFFFFF:F:FFFF  
@A00155:342:HHGFNDSXY:1:1465:3721:32769 1:N:0:GAACCTAG+TCCGCATA  
CTTCTCTCGGGCCCACAGCCTTACAGCTGTTGAGCACGGTATCCTCTGCCGAAACAGAGGTTGGACAA  
GACCGGAGGGGTCTCCTAGTTCCAAAGGAGATGTACTCCGGGCTTGTTACGACCTACCGTGTAAGTC  
+  
:FFFFFFFFFFFFFFFF,FFFFFFFFFFFF,,FFFFFFFFFFFFFFFFFFFFFFFF:FFFFFFFF:FFFF  
FFFFFFFFFFFFFFFFFFFFFFFFFFFFFFFFFFFFFFFFFFFFFFFFFFFFFFFFFFFFFFFFFFFFFFFFFFFF:FFFFFFF  
@A00155:342:HHGFNDSXY:1:1466:3043:3286 1:N:0:GAACCTAG+TCCGCATA  
TGTGGAGGGCGAGAGAGAGCGACTTCTCTCGGGCCCACAGCCTTACAGCTGTGGAGCACGGTATCCTC  
TGCCGAAACAGAGGTTGGACAAGACCGGAGGGGTCTCCTAGTTCCAAAGAGATGTACTCCGGG  
+  
FFFFFFFFFFFFFFFFFFFFFFFFFFFFFFFFFFFFFFFFFFFFFFFFFFFFFFFFFFFFFFFFFFFFFFFFFFFF:FFFFFFFFFFFFFFFFFFFF:FFFF  
FFFFFFFFF:FFFFFFFFFFFFFFFF:FFFFFFFFFFFFFFFFFFFFFFFFFFFFFFFFFFFFFFFFFFFFFFFFFFFF  
@A00155:342:HHGFNDSXY:1:1466:28854:6214 1:N:0:GAACCTAG+TCCGCATA  
TGCTCCACAGCTGTAAGGCTGTGGGCCCCGAGAGAAGTCGCTCTCTCTCGCCCTCCACATCCCTCTCGG  
CATTGAGATGACCATAGGCCAGAGGTGAGTCCTTAAGTGGACACAGCTGATCTAAGGCGGTGTGGTGG  
+  
FFFFFFFFFFFFFFFFFFFFFFFFFFFFFFFFFFFFFFFFFFFFFFFFFFFFFFFFFFFFFFFFFFFFFFFFFFFF  
FF:FFFFFFFFFFFFFFFFFFFFFFFFFFFFFFFFFFFFFFFFFFFFFFFFFFFFFFFFFFFFFFFFFFFFFFFFFFFF:FFFFFFF  
@A00155:342:HHGFNDSXY:1:1466:17897:31422 1:N:0:GAACCTAG+TCCGCATA  
CTTCTCTCGGGCCCACAGCCTTACAGCTGTGGAGCACGGTATCCTCTGCCGAAACAGAGGTTGGACAA  
GACCGGAGGGGTCTCCTAGTTCCAAAGGAGATGTACTCCGGGCTTGTTACGACCTACCGTGTAAGTC  
+  
FFFFFFFFFFFFFFFFFFFFFFFFFFFFFFFFFFFFFFFFFFFFFFFFFFFFFFFFFFFFFFFFFFFFFFFFFFFF  
F:FFFFFFFFFFFFFFFF:FFFFFFFFFFFFFFFFFFFFFFFFFFFFFFFFFFFFFFFFFFFFFFFFFFFFFFFFFFFF  
@A00155:342:HHGFNDSXY:1:1468:31566:5776 1:N:0:GAACCTAG+TCCGCATA  
GGATGTGGAGGGCGAGAGAGAGCGACTTCTCTCGGGCCCACAGCCTTACAGCTGTGGAGCACGGTATC

CTCTGCCGAAACAGAGGTGGACAAGACCGGAGGGGTCTCCTGGTTCCAAAGGAGATGTACTCC  
+  
FFFFFFFFFFFFFFFFFFFFFFFFFFFFFFFFFFFFF:FFFFFFFFF:FFFFFFFFFF:F:FFFFFFFFFFFFFFFFFFFFFFF  
FFFFFFFFFFFFFFFFFFFFFFFFFFFFFFFFFFFFFFFFFFFFF:FFFFFFFFFFFFFFFFFFFFFFFFFFFFFFFFFFFFF  
@A00155:342:HHGFNDSXY:1:1468:30888:15405 1:N:0:GAACCTAG+TCCGCATA  
TGGTCATCTCAATGCCGAGAGGGATGTGGGGGCGAGAGAGAGCGACTTCTCTCGGGCCCACAGCCTT  
ACAGCTGTGGAGCACGGTATCCTCTGCCGAAACAGAGGTTGGACAAGACCGGAGGGGTCTCCTAGTTC  
+  
FFFFFFFFFFFFFFFFFFFFFFFFFFFFFFFFFFFFF:FFFFFFFFFFFFFFFFFFFFFFFFFFFFFFFFFFFFFFFFFFFFF  
FFFFF:FFFFFFFFFFFFFFFFF:FFFFFFFFFFFFFFFFF,FFFFFFFFFFFFFFFFFFFFFFFFFFFFFFFFF:F  
@A00155:342:HHGFNDSXY:1:1469:15881:5760 1:N:0:GAACCTAG+TCCGCATA  
CAGCCTTACAGCTGTGGAGCACGGTATCCTCTGCCGAAACAGAGGTTGGACAAGACCGGAGGGGTCTC  
CTAGTTCAAAGGAGATGTACTCCGGGCTTGTTACGACCTACCGTGTAAGTCGTAGTCTAGTAGGCT  
+  
FFFFFFFFFFFFFFFFFFFFFFFFFFFFFFFFFFFFF:FFFFFFFFFFFFFFFFFFFFFFFFFFFFFFFFFFFFFFFFFFFFF  
FFFFFFFFFFFFFFFFFFFFFFFFFFFFFFFFFFFFFFFFFFFFF:FFFFFFFFFFFFFFFFFFFFFFFFFFFFFFFFFFFFF  
@A00155:342:HHGFNDSXY:1:1469:17544:8891 1:N:0:GAACCTAG+TCCGCATA  
GAGCGACTTCTCTCGGGCCCACAGCCTTACAGCTGTGGAGCACGGTATCCTCTGCCGAAACAGAGGTT  
GGACAAGACCGGAGGGGTCTCCTAGTTCAAAGGAGATGTACTCCGGGCTTGTTACGACCTACCGTG  
+  
FFFFFFFFFFFFFFFFFFFFFFFFFFFFFFFFFFFFF:FFFFFFFFFFFFFFFFFFFFFFFFFFFFFFFFFFFFF  
FFFFFFFFFFFFFFFFFFFFFFFFFFFFFFFFFFFFF:FFFFFFFFFFFFFFFFFFFFFFFFFFFFFFFFFFFFF,FFFFF  
@A00155:342:HHGFNDSXY:1:1469:32678:12430 1:N:0:GAACCTAG+TCCGCATA  
GACTTCTCTCGGGCCCACAGCCTTACAGCTGTGGAGCACGGTATCCTCTGCCGAAACAGAGGTTGGAC  
AAGACCGGAGGGGTCTCCTAGTTCAAAGGAGATGTACTCCGGGCTTGTTACGACCTACCGTGTAAG  
+  
FFFFFFFFFFFFFFFFFFFFFFFFFFFFF,,FFF:FFFFFFFFFFFFFFFFFFFFFFFFFFFFFFFFFFFFFFFFFFFFF  
FFFFFFFFFFFFFFFFFFFFFFFFFFFFFFFFFFFFF:FFFFF  
@A00155:342:HHGFNDSXY:1:1469:30056:16157 1:N:0:GAACCTAG+TCCGCATA  
ATCTCAATGCCGAGAGGGATGTGGAGGGCGAGAGAGAGCGACTTCTCTCGGGCCCACAGCCTTACAGC  
TGTGGAGCACGGTATCCTCTGCCGAAACAGAGGTTGGACAAGACCGGAGGGGTCTCCTAGTTCCATAG  
+  
FFFFFFFFFFFFFFFFFFFFFFFFFFFFFFFFFFFFF:FF,FFF:FFFFFFFF:FFFFFFFFF  
FFF:FFFFFFFFFFFFFFFFFFFFFFFFFFFFF:FFFFFFFFFFFFFFFFFFFFFFFFFFFFFFFFFFFFF:FFFFF  
@A00155:342:HHGFNDSXY:1:1470:7618:14434 1:N:0:GAACCTAG+TCCGCATA  
CTCTGCCGAAACAGAGGTTGGACAAGACCGGAGGGGTCTCCTAGTTCAAAGGAGATGTACTCCGGGC  
TTGTTACGACCTACCGTGTAAGTCGTAGTCTAGTAGGCTACCTGACGAGTCCTTTTAGGACGAAAC  
+  
FFFFFFFFFFFFFFFFFFFFFFFFFFFFF,FFFFFFFFFFFFFFFFFFFFFFFFFFFFFFFFFFFFFFFFFFFFF  
FFFFF:FFFFFFFFFFFFFFFFFFFFFFFFFFFFF:FFFFFFFFFFFFFFFFFFFFFFFFFFFFFFFFFFFFF:FFF  
@A00155:342:HHGFNDSXY:1:1470:20934:21652 1:N:0:GAACCTAG+TCCGCATA  
ACCTCTGTTTCGGCAGAGGATACCGTGCTCCACAGCTGTAAGGCTGTGGCCCCGAGAGAAGTCGCTCT  
CTCTCGCCCTTACATCCCTCTCGGCATTGAGATGACCATAGGCCAGAGGTGAGTCCTTAAG  
+  
FFFFFFFFFFFFFFFFFFFFFFFFFFFFF:FFFFFFFFFFFFFFFFFFFFFFFFFFFFFFFFFFFFFFFFFFFFF  
FFFFFFFFFFFFFFFFFFFFFFFFFFFFF,FFFFFFFFFFFFFFFFFFFFFFFFFFFFFFFFFFFFFFFFFFFFF:  
@A00155:342:HHGFNDSXY:1:1470:19741:26631 1:N:0:GAACCTAG+TCCGCATA  
GGGCGAGAGAGAGCGACTTCTCTCGGGCCCACAGCCTTACAGCTGTGGAGCACGGTATCCTCTGCCGA  
AACAGAGGTTGGACAAGACCGGAGGGGTCTCCTAGTTCAAAGGAGATGTACTCCGGGCTAGTTCAG  
+  
F:,FFFFFFFFFFFFFFFFFFFFFFFFFFFFF:,FFFFFFFFFFFFFFFFFFFFFFFFFFFFFFFFFFFFF,FFFFFFFFFFFFFFFFF  
FFFF,FFFF,,FFFFFFFFFFFFFFFFFFFFFFFFFFFFF:FFFF,FFFFFFFFF:F:FFF,FFFFFFF  
@A00155:342:HHGFNDSXY:1:1471:13982:6887 1:N:0:GAACCTAG+TCCGCATA  
TCAATGCCGAGAGGGATGTGGAGGGCGAGAGAGAGCGACTTCTCTCGGGCCCACAGCCTTACAGCTGT

GGAGCACGGTATCCTCTGCCGAAACAGAGGTTGGACAAGACCGGAGGGGTCTCCTAGTTCCAAAGGAG  
+  
FFFFFFFFFFFF:FFFF:FFFFFFFFFFFFFFFFFFFFFFFFFFFFFFFFFFFFFFFFFFFFFFFFFFFFFFFFFFFFFFFF  
FFFFFFFFFFFFFFFFFFFFFFFFFFFFFFFFFFFFFFFFFFFFFFFFFFFFFFFFFFFFFFFFFFFFFFFFFFFFFFFFFFFF  
@A00155:342:HHGFNDSXY:1:1471:5701:9768 1:N:0:GAACCTAG+TCCGCATA  
GAGCGACTTCTCTCGGGCCACAGCCTTACAGCTGTGGAGCACGGTATCCTCTGCCGAAACAGAGGTT  
GGACAAGACCGGAGGGGTCTCCTGGTTCCAAAGGAGATGTACTCCGGGCTTGTTACGACCTACCGTG  
+  
:FFFFFFFFFFFFFFFFFFFFFFFFFFFFFFFFFFFFFFFF:F,FFFF:FFFF:FFFFFF,FFFFFF:FFFFFFFF:FFF  
FFFF:FFFFFFFFFFFFFFFFFFFFFFFFFFFFFFFFFFFFFFFF:FFFFFFFFFFFF:FFFFFFFFFFFFFFFFFFFF  
@A00155:342:HHGFNDSXY:1:1471:28682:15530 1:N:0:GAACCTAG+TCCGCATA  
CTTCTCTCGGGCCACAGCCTTACAGCTGTGGAGCACGGTATCCTCTGCCGAAACAGAGGTTGGACAA  
GACCGGAGGGGTCTCCTAGTTCCAAAGGAGATGTACTCCGGGCTTGTTACGACCTACCGTGTAAGTC  
+  
FFFFFFFFFFFFFFFFFFFFFFFFFFFFFFFFFFFFFFFFFFFFFFFFFFFFFFFFFFFFFFFFFFFFFFFFFFFFFFFFFFFF  
FFFFFFFFFFFFFFFFFFFFFFFFFFFFFFFFFFFFFFFFFFFFFFFFFFFFFFFFFFFFFFFFFFFFFFFFFFFFFFFFFFFF  
@A00155:342:HHGFNDSXY:1:1471:22525:22341 1:N:0:GAACCTAG+TCCGCATA  
GAGAGAGCGACTTCTCTCGGGCCACAGCCTTACAGCTGTGGAGCACGGTATCCTCTGCCGAAACAGA  
GGTTGGACAAGACCGGAGGGGTCTCCTAGTTCCAAAGGAGATGTACTCCGGGCTTGTTACGACCTAC  
+  
FFFFFFFFFFFFFFFFFFFFFFFFFFFFFFFFFFFFFFFFFFFFFFFFFFFFFFFFFFFFFFFFFFFFFFFFFFFFFFFFFFFF  
FFFFFFFFFFFFFFFFFFFFFFFFFFFFFFFFFFFFFFFFFFFFFFFFFFFFFFFFFFFFFFFFFFFFFFFFFFFFFFFFFFFF  
@A00155:342:HHGFNDSXY:1:1471:23954:23750 1:N:0:GAACCTAG+TCCGCATA  
GAGAGAGCGACTTCTCTCGGGCCACAGCCTTACAGCTGTGGAGCACGGTATCCTCTGCCGAAACAGA  
GGTTGGACAAGACCGGAGGGGTCTCCTAGTTCCAAAGGAGATGTACTCCGGGCTTGTTACGACCTAC  
+  
FFFFFFFFFFFFFFFFFFFFFFFFFFFFFFFFFFFFFFFFFFFFFFFFFFFFFFFFFFFFFFFFFFFFFFFFFFFFFFFFFFFF  
FFFFFFFFFFFF:FFFFFFFFFFFFFFFFFFFFFFFFFFFFFFFFFFFFFFFFFFFFFFFFFFFFFFFFFFFFFFFFFFFF:F  
@A00155:342:HHGFNDSXY:1:1471:13557:24377 1:N:0:GAACCTAG+TCCGCATA  
CTCAATGCCGAGAGGGATGTGGAGGGCGAGAGAGAGCGACTTCTCTCGGGCCACAGCCTTACAGCTG  
TGGAGCACGGTATCCTCTGCCGAAACAGAGGTTGGACAAGACCGGAGGGGTCTCCTGGTTCCAAAGGA  
+  
FFFFFFFFFFFFFFFFFFFFFFFFFFFFFFFFFFFFFFFFFFFFFFFFFFFFFFFFFFFFFFFFFFFFFFFFFFFFFFFFFFFF  
FFFFFFFFFFFFFFFFFFFFFFFFFFFFFFFFFFFFFFFFFFFFFFFFFFFFFFFFFFFFFFFFFFFFFFFFFFFFFFFFFFFF  
@A00155:342:HHGFNDSXY:1:1471:12228:24925 1:N:0:GAACCTAG+TCCGCATA  
CTCAATGCCGAGAGGGATGTGGAGGGCGAGAGAGAGCGACTTCTCTCGGGCCACAGCCTTACAGCTG  
TGGAGCACGGTATCCTCTGCCGAAACAGAGGTTGGACAAGACCGGAGGGGTCTCCTGGTTCCAAAGGA  
+  
FFFFFFFFFFFFFFFFFFFFFFFFFFFFFFFFFFFFFFFFFFFFFFFFFFFFFFFFFFFFFFFFFFFFFFFFFFFFFFFFFFFF  
FFFFFFFFFFFFFFFFFFFFFFFFFFFFFFFFFFFFFFFFFFFFFFFFFFFFFFFFFFFFFFFFFFFFFFFFFFFFFFFFFFFF  
@A00155:342:HHGFNDSXY:1:1471:25861:25457 1:N:0:GAACCTAG+TCCGCATA  
GAGAGCGACTTCTCTCGGGCCACAGCCTTACAGCTGTGGAGCACGGTATCCTCTGCCGAAACAGAGG  
TTGGACAAGACAGAGGGGTCTCCTAGTTCCAAAGGAGATGTACTCCGGGCTTGTTACGACCTACCG  
+  
FFFFFFFFFFFFFFFFFFFFFFFFFFFFFFFFFFFFFFFFFFFFFFFFFFFFFFFFFFFFFFFFFFFFFFFFFFFFFFFFFFFF  
FFFFFFFFFFFFFFFFFFFFFFFFFFFFFFFFFFFFFFFFFFFFFFFFFFFFFFFFFFFFFFFFFFFFFFFFFFFFFFFFFFFF  
@A00155:342:HHGFNDSXY:1:1471:9688:34272 1:N:0:GAACCTAG+TCCGCATA  
TCCTCTGCCGAAACAGAGGTTGGACAAGACCGGAGGGGTCTCCTGGTTCCAAAGGAGATGTACTCCGG  
GCTTGTTACGACCTACCGTGTAAGTCGTAGTCTAGTAGGCTACCTGACGAGTCCTTTTAGGACGAA  
+  
FFFFFFFFFFFFFFFFFFFFFFFFFFFFFFFFFFFFFFFFFFFFFFFFFFFFFFFFFFFFFFFFFFFFFFFFFFFFFFFFFFFF  
FFFFFFFFFFFFFFFFFFFFFFFFFFFFFFFFFFFFFFFFFFFFFFFFFFFFFFFFFFFFFFFFFFFFFFFFFFFFFFFFFFFF  
@A00155:342:HHGFNDSXY:1:1472:2076:4679 1:N:0:GAACCTAG+TCCGCATA  
CTTCTCTCGGGCCACAGCCTTACAGCTGTGGAGCACGGTATCCTCTGCCGAAACAGAGGTTGGACAA

GACCGGAGGGGTCTCCTAGTTCCAAAGGAGATGTACTCCGGGCTTGTTACGACCTACCG  
+  
FFFFFFFFFFFFFFFFFFFFFFFFFFFFFFFFFFFFFFFFFFFFFFFFFFFFFFFFFFFFFFFFFFFFFFFF  
FFFFFFFFFFFFFFFFFFFFFFFFFFFFFFFFFFFFFFFFFFFFFFFFFFFFFFFFFFFFFFFFFFFFFFFF  
@A00155:342:HHGFNDSXY:1:1472:8567:23876 1:N:0:GAACCTAG+TCCGCATA  
GGATGTGGAGGGCGAGAGAGAGCGACTTCTCTCGGGCCACAGCCTTACAGCTGTGGAGCACGGTATC  
CTCTGCCGAAACAGAGGTTGGACAAGACCGGAGGGGTCTCCTGGTTCCAAAGGAGATGTACTCC  
+  
FFFFFFFFFFFFFFFFFFFFFFFFFFFFFFFFFFFFFFFFFFFFFFFFFFFFFFFFFFFFFFFFFFFFFFFF  
FFFFFFFFFFFFFFFFFFFFFFFFFFFFFFFFFFFFFFFFFFFFFFFFFFFFFFFFFFFFFFFFFFFFFFFF  
@A00155:342:HHGFNDSXY:1:1472:3016:25128 1:N:0:GAACCTAG+TCCGCATA  
AGGGCGAGAGAGAGCGACTTCTCTCGGGCCACAGCCTTACAGCTGTGGAGCACGGTATCCTCTGCCG  
AAACAGAGGTTGGACAAGACCGGAGGGGTCTCCTAGTTCCAAAGGAGATGTACTCCGGGCTTGTTAC  
+  
FFFFFFFFFFFFFFFFFFFFFFFFFFFFFFFFFFFFFFFFFFFFFFFFFFFFFFFFFFFFFFFFFFFFFFFF  
FFFFFFFFFFFFFFFFFFFFFFFFFFFFFFFFFFFFFFFFFFFFFFFFFFFFFFFFFFFFFFFFFFFFFFFF  
@A00155:342:HHGFNDSXY:1:1472:19388:26490 1:N:0:GAACCTAG+TCCGCATA  
CTCTCGCCCTCCACATCCCTCTCGGCATTGAGATGACCATAGGCCAGAGGTGAGTCCTTAAGTGGACA  
CAGCTGATCTAAGGCGGTGTGGCGGGGCATGGGTTTGAACCCCATGACGGTCGGAGTCTAGTAGGCT  
+  
FFFFFFFFFFFFFFFFFFFFFFFFFFFFFFFFFFFFFFFFFFFFFFFFFFFFFFFFFFFFFFFFFFFFFFFF  
FFFFFFFFFFFFFFFFFFFFFFFFFFFFFFFFFFFFFFFFFFFFFFFFFFFFFFFFFFFFFFFFFFFFFFFF  
@A00155:342:HHGFNDSXY:1:1472:28971:32064 1:N:0:GAACCTAG+TCCGCATA  
CCACATCCCTCTCGGCATTGAGATGACCATAGGCCAGAGGTGAGTCCTTAAGTGGACACAGCTGATCT  
AAGGCGGTGTGGCGGGGCATGGGTTTGAACCCCATGACGGTCGGAGTCTAGTAGGCTCCCTGATGAG  
+  
FFFFFFFFFFFFFFFFFFFFFFFFFFFFFFFFFFFFFFFFFFFFFFFFFFFFFFFFFFFFFFFFFFFFFFFF  
FFFFFFFFFFFFFFFFFFFFFFFFFFFFFFFFFFFFFFFFFFFFFFFFFFFFFFFFFFFFFFFFFFFFFFFF  
@A00155:342:HHGFNDSXY:1:1473:13521:12226 1:N:0:GAACCTAG+TCCGCATA  
CCTTACAGCTGTGGAGCACGGTATCCTCTGCCGAAACAGAGGTTGGACAAGACCGGAGGGGTCTCCTA  
GTTCCAAAGGAGATGTACTCCGGGCTTGTTACGACCTACCGTGTAAGTCGTAGTCTAGTAGGCTACC  
+  
FFFFFFFFFFFFFFFFFFFFFFFFFFFFFFFFFFFFFFFFFFFFFFFFFFFFFFFFFFFFFFFFFFFFFFFF  
FFFFFFFFFFFFFFFFFFFFFFFFFFFFFFFFFFFFFFFFFFFFFFFFFFFFFFFFFFFFFFFFFFFFFFFF  
@A00155:342:HHGFNDSXY:1:1473:14344:34757 1:N:0:GAACCTAG+TCCGCATA  
TGTCCACTTAAGGACTCACCTCTGGCCTATGGTCATCTCAATGCCGAGAGGGATGTGGAGGGCGAGAG  
AGAGCGACTTCTCTCGGGCCACAGCCTTACAGCTGTGGAGCACGGTATCCTCTGCCGAAACAGAGGT  
+  
FFFFFFFFFFFFFFFFFFFFFFFFFFFFFFFFFFFFFFFFFFFFFFFFFFFFFFFFFFFFFFFFFFFFFFFF  
FFFFFFFFFFFFFFFFFFFFFFFFFFFFFFFFFFFFFFFFFFFFFFFFFFFFFFFFFFFFFFFFFFFFFFFF  
@A00155:342:HHGFNDSXY:1:1474:10945:10457 1:N:0:GAACCTAG+TCCGCATA  
AGGGCGAGAGAGAGCGACTTCTCTCGGGCCACAGCCTTACAGCTGTGGAGCACGGTATCCTCTGCCG  
AAACAGAGGTTGGACAAGACCGGAGGGGTCTCCTAGTTCCAAAGGAGATGTACTCCGGGCTTGTTAC  
+  
FFFFFFFFFFFFFFFFFFFFFFFFFFFFFFFFFFFFFFFFFFFFFFFFFFFFFFFFFFFFFFFFFFFFFFFF  
FFFFFFFFFFFFFFFFFFFFFFFFFFFFFFFFFFFFFFFFFFFFFFFFFFFFFFFFFFFFFFFFFFFFFFFF  
@A00155:342:HHGFNDSXY:1:1474:14271:12461 1:N:0:GAACCTAG+TCCGCATA  
GAGCGACTTCTCTCGGGCCACAGCCTTACAGCTGTGGAGCACGGTATCCTCTGCCGAAACAGAGGTT  
GGACAAGACCGGAGGGGTCTCCTAGTTCCAAAGGAGATGTACTCCGGGCTTGTTACGACCTACCGTG  
+  
FFFFFFFFFFFFFFFFFFFFFFFFFFFFFFFFFFFFFFFFFFFFFFFFFFFFFFFFFFFFFFFFFFFFFFFF  
FFFFFFF:FFFFFFFFFFFFFFFFFFFFFFFFFFFFFFFFFFFFFFFFFFFFFFFFFFFFFFFFFFFFFFFF  
@A00155:342:HHGFNDSXY:1:1474:19533:13808 1:N:0:GAACCTAG+TCCGCATA  
AGGGATGTGGAGGGCGAGAGAGAGCGACTTCTCTCGGGCCACAGCCTTACAGCTGTGGAGCACGGTA

TCCTCTGCCGAAACAGAGGTTGGACAAGACCGGAGGGGTCTCCTAGTTCCAAAGGAGATGTACTCCGG  
+  
FFFFFFFF:FFFFFFFFFFFFFFFFFFFFFFFFFFFFFFFFFFFFFFFFFFFFFFFFFFFFFFFFFFFFFFFF  
FFFFFFFFFFFFFFFFFFFFFFFFFFFFFFFFFFFFFFFFFFFFFFFFFFFFFFFFFFFFFFFFFFFFFFFF  
@A00155:342:HHGFNDSXY:1:1474:28239:18458 1:N:0:GAACCTAG+TCCGCATA  
CCATGCCCGCCACACCGCCTTAGATCAGCTGTGTCCACTTAAGGACTCACCTCTGGCCTATGGTCAT  
CTCAATGCCGAGAGGGATGTGGAGGGCGAGAGAGAGCGACTTCTCTCGGGCCCACAGCCTTACAGCTG  
+  
FFFFFFFFFFFFFFFFFFFFFFFF:FFFFFFFFFFFFFFFFFFFFFFFFFFFFFFFFFFFFFFFFFFFFFFFF  
FFFFFFFFFFFFFFFFFFFFFFFF:FFFFFFFFFFFFFFFFFFFFFFFFFFFFFFFFFFFFFFFFFFFFFFFF  
@A00155:342:HHGFNDSXY:1:1474:16260:18474 1:N:0:GAACCTAG+TCCGCATA  
ATGTGGAGGGCGAGAGAGAGCGACTTCTCTCGGGCCCACAGCCTTACAGCTGTGGAGCACGGTATCCT  
CTGCCGAAACAGAGGTTGGACAAGACCGGAGGGGTCTCCTAGTTCCAAAGGAGATGTACTCCGGGCTT  
+  
FFFFFFFFF:FFFFFFFFFFFFFFFFFFFFFFFFFFFFFFFFFFFFFFFFFFFFFFFFFFFFFFFFFFFFFFF  
FFFFFFFFFFFFFFFFFFFFFFFF:FFFFFFFFFFFFFFFFFFFFFFFFFFFFFFFFFFFFFFFFFFFFFFF  
@A00155:342:HHGFNDSXY:1:1475:3206:1063 1:N:0:GAACCTAG+TCCGCATA  
ACTTCTCTCGGGCCCACAGCCTTACAGCTGTGGAGCACGGTATCCTCTGCCGAAACAGAGGTTGGACA  
AGACCGGAGGGGTCTCCTGGTTCCAAAGGAGATGTACTCCGGGCTTGTTACGACCTACCGTGTAAGT  
+  
FFFFFFFFFFFFFFFFFFFFFFFFFFFFFFFFFFFFFFFFFFFFFFFFFFFFFFFFFFFFFFFFFFFFFFFF  
F,FFFFFFFFFFFFFFFFFFFFFFFFFFFFFFFFFFFFFFFFFFFFFFFFFFFFFFFFFFFFFFFFFFFFFFF  
@A00155:342:HHGFNDSXY:1:1475:13096:11021 1:N:0:GAACCTAG+TCCGCATA  
ACTAGACTACGACTTACACGGTAGGTCGTGAACAAGCCCGGAGTACATCTCCTTTGGAAGTACAGAC  
CCCTCCGGTCTTGTCCAACCTCTGTTTCGGCAGAGGATACCGTGCTCCACAGCTGTAAGGCTGTGGGC  
+  
FFFFFFFFFFF:FFF,FFFF,FFFFFFFFFFFFFFFFFFFFFFFF:FFFFFFFFFFFFFFFF:FFF:FFF:FFFF  
FFFFFFFFFFFFFFFFFFFFFFFFFFFFFFFFFFFFFFFFFFFFFFFFFFFFFFFFFFFFFFFFFFFFFFFF  
@A00155:342:HHGFNDSXY:1:1475:23366:11522 1:N:0:GAACCTAG+TCCGCATA  
GCGACTTCTCTCGGGCCCACAGCCTTACAGCTGTGGAGCACGGTATCCTCTGCCGAAACAGAGGTTGG  
ACAAGACCGGAGGGGTCTCCTGGTTCCAAAGGAGATGTACTCCGGGCTTGTTACGACCTACCGTGTA  
+  
FFFFFFFFFFFFFFFFFFFFFFFFFFFFFFFFFFFFFFFFFFFFFFFFFFFFFFFFFFFFFFFFFFFFFFFF  
FFFFFFFFFFFFFFFFFFFFFFFFFFFFFFFFFFFFFFFFFFFFFFFFFFFFFFFFFFFFFFFFFFFFFFFF  
@A00155:342:HHGFNDSXY:1:1476:22092:28823 1:N:0:GAACCTAG+TCCGCATA  
CTTCTCTCGGGCCCACAGCCTTACAGCTGTGGAGCACGGTATCCTCTGCCGAAACAGAGGTTGGACAA  
GACCGGAGGGGTCTCCTAGTTCCAAAGGAGATGTACTCCGGGCTTGTTACGACCTACCGTGTAAGTC  
+  
FFFFFFFFFFFFFFFFFFFFFFFFFFFFFFFFFFFFFFFFFFFFFFFFFFFFFFFFFFFFFFFFFFFFFFFF  
FFFFFFFFFFFFFFFFFFFFFFFFFFFFFFFFFFFFFFFFFFFFFFFFFFFFFFFFFFFFFFFFFFFFFFFF  
@A00155:342:HHGFNDSXY:1:1476:4218:29465 1:N:0:GAACCTAG+TCCGCATA  
AGCGACTTCTCTCGGGCCCACAGCCTTACAGCTGTGGAGCACGGTATCCTCTGCCGAAACAGAGGTTG  
GACAAGACCGGAGGGGTCTCCTAGTTCCAAAGGAGATGTACTCCGGGCTTGTTACGACCTACC  
+  
:FFFFFFFFFFFFFFFFFFFFFFFF:FFFFFFFFF::FFFFFFFFFFFFFFFF,FFFFFFFFFFFFFFFFFFFF  
FFFFF,FFF:FFFFFFFFFFFFFFFFFFFFFFFFFFFFFFFF:FFFFF:FFFFFFFFFFFFFFFFFFFF  
@A00155:342:HHGFNDSXY:1:1476:7428:33552 1:N:0:GAACCTAG+TCCGCATA  
ATCCTCTGCCGAAACAGAGGTTGGACAAGACCGGAGGGGTCTCCTAGTTCCAAAGGAGATGTACTCCG  
GGCTTGTTACGACCTACCGTGTAAGTCGTAGTCTAGTAGGCTACCTGACGAGTCCTTTT  
+  
FFFFFFFFFFF:FFFFFFFFFFFFFFFFFFFFFFFFFFFFFFFFFFFFFFFFFFFFFFFFFFFFFFFFFFFF  
FFFFFFFFFFFFFFFFFFFFFFFF,FFFFFFFFFFFFFFFFFFFFFFFFFFFFFFFFFFFFFFFFFFFFF  
@A00155:342:HHGFNDSXY:1:1477:24451:5196 1:N:0:GAACCTAG+TCCGCATA  
TTCTCTCGGGCCCACAGCCTTACAGCTGTGGAGCACGGTATCCTCTGCCGAAACAGAGGTTGGACAAG



ACCGGAGGGGTCTCCTAGTTCCAAAGGAGATGTACTCCGGGCTTGTTACGACCTACCGTGTAAGTCG  
+  
:FFFF:FFF:FFFFFFFFF,:F:FFFF:F::FFFF,FF,:FFFFFFFFF:FFFF,F,FFFFFFFF,  
FFFFFFFF:F:FFFFFFFFFFFF,FFF:FF,FFFFFFFFFFFFFFFF:FFFFFFFFFFFF:FFFFFFF:  
@A00155:342:HHGFNDSXY:1:1477:4417:11240 1:N:0:GAACCTAG+TCCGCATA  
GGATGTAGAGGGCGAGAGAGAGCGACTTCTCTCGGGCCACAGCCTTACAGCTGTGGAGCACGGTATC  
CTCTGCCGAAACAGAGGTTGGACAAGACCGGAGGGGTCTCCTAGTTCCAAAGGAGATGTACTCC  
+  
FFFFFFFFFFFFFFFF:FFFFFFFFFFFFFFFFFFFFFFFFFFFFFFFF:FFFFFFFFFFFFFFFFFFFFFFF  
FFFFFFFFFFFFFFFFFFFFFFFF:FFFFFFFFFFFF:FFFFFFFFFFFFFFFFFFFFFFFF:FFFFF  
@A00155:342:HHGFNDSXY:1:1477:32967:14027 1:N:0:GAACCTAG+TCCGCATA  
GACTTCTCTCGGGCCACAGCCTTACAGCTGTGGAGCACGGTATCCTCTGCCGAAACAGAGGTTGGAC  
AAGACCGGAGGGGTCTCCTAGTTCCAAAGGAGATGTACTCCGGGCTTGTTACGACCTACCGTGTAAG  
+  
FFFFFFFFFFFFFFFFFFFF,:FFFFFFFFFFFFFFFF:FFFFFFFFFFFFFFFFFFFFFFFFFFFF  
FFFFFFFFFFFFFFFFFFFFFFFFFFFFFFFFFFFFFFFFFFFFFFFF:FFFFFFFFFFFFFFFFFFFFFFF  
@A00155:342:HHGFNDSXY:1:1477:16251:32831 1:N:0:GAACCTAG+TCCGCATA  
ACTTCTCTCGGGCCACAGCCTTACAGCTGTGGAGCACGGTATCCTCTGCCGAAACAGAGGTTGGACA  
AGACCGGAGGGGTCTCCTAGTTCCAAAGGAGATGTACTCCGGGCTTGTTACGACCTACCGTGTAAGT  
+  
FFFFFFFFFFFFFFFFFFFFFFFFFFFFFFFFFFFFFFFFFFFFFFFFFFFFFFFFFFFFFFFFFFFFF  
FFFFFFFFFFFFFFFFFFFFFFFFFFFFFFFFFFFFFFFFFFFFFFFFFFFFFFFFFFFFFFFFFFFFF  
@A00155:342:HHGFNDSXY:1:1478:2239:9690 1:N:0:GAACCTAG+TCCGCATA  
GCGACTTCTCTCGGGCCACAGCCTTACAGCTGTGGAGCACGGTATCCTCTGCCGAAACAGAGGTTGG  
ACAAGACCGGAGGGGTCTCCTGGTTCCAAAGGAGATGTACTCCGGGCTTGTTACGACCTACC  
+  
FF:FFFFFF:FFFFFFF,:FFFFFFF,FFFFFFF,FFFFFFF,FFFFFFF,FFFFFFF:FFFFFFF  
FFFF,FFFFFFFFFFFFFFFFFFFFFFFFFFFF,FF,FF,FFFFFFFFFFFFFFFFFFFFFFFFFFFF  
@A00155:342:HHGFNDSXY:1:1478:27190:13103 1:N:0:GAACCTAG+TCCGCATA  
ACTTCTCTCGGGCCACAGCCTTACAGCTGTGGAGCACGGTATCCTCTGCCGAAACAGAGGTTGGACA  
AGACCGGAGGGGTCTCCTAGTTCCAAAGGAGATGTACTCCGGGCTTGTTACGACCTACCGTGTAAGT  
+  
FFFFFFF:FFFFFFFFFFFFFFFFFFFFFFFFFFFFFFFFFFFFFFFFFFFFFFFFFFFFFFFFFFFFF  
F:,FFFFFFFFFFFFFFFFFFFFFFFFFFFFFFFFFFFFFFFFFFFFFFFF:FFFFFFFFFFFFFFFFFFFF  
@A00155:342:HHGFNDSXY:1:1478:29550:24205 1:N:0:GAACCTAG+TCCGCATA  
AAGGACTCACCTCTGGCCTATGGTCATCTCAATGCCGAGAGGGATGTGAAGGGCGAGAGAGAGCGACT  
TCTCTCGGGCCACAGCCTTACAGCTGTGGAGCACGGTATCCTCTGCCGAAACAGAGGTTGGACAAGA  
+  
FFFFFFFFFFFFFFFFFFFFFFFFFFFFFFFFFFFFFFFFFFFFFFFFFFFFFFFFFFFFFFFFFFFFF  
FFFFFFFFFFFFFFFFFFFFFFFFFFFFFFFFFFFFFFFFFFFFFFFFFFFFFFFFFFFFFFFFFFFFF  
@A00155:342:HHGFNDSXY:1:1501:32389:5447 1:N:0:GAACCTAG+TCCGCATA  
ATCTCAATGCCGAGAGGGATGTGGAGGGCGAGAGAGAGCGACTTCTCTCGGGCCACAGCCTTACAGC  
TGTGGAGCACGGTATCCTCTGCCGAAACAGAGGTTGGACAAGACCGGAGGGGTCTCCTAGTTCCAAAG  
+  
FFFFFFFFFFFFFFF,FFFFFF,FFFFFFFFFFFFFFFFFFFFFFFFFFFFFFFFFFFFFFFFFFFFF  
FFFFFFFFFFFFFFFFFFFFFFFFFFFFFFFFFFFFFFFF:FFFFFFFFF:FFFFFFFFFFFFFFFFFFFFF  
@A00155:342:HHGFNDSXY:1:1501:10682:16673 1:N:0:GAACCTAG+TCCGCATA  
TTCTCTCGGGCCACAGCCTTACAGCTGTGGAGCACGGTATCCTCTGCCGAAACAGAGGTTGGACAAG  
ACCGGAGGGGTCTCCTAGTTCCAAAGGAGATGTACTCCGGGCTTGTTACGACCTACCGTGTAAGTCG  
+  
FFFFFFFFFFFFFFFFFFFF:FFFFFFFFFFFFFFFFFFFFFFFFFFFFFFFFFFFFFFFFFFFFFFFFFFFF  
FFFFFFFFFFFFFFFFFFFFFFFFFFFFFFFFFFFFFFFFFFFFFFFF:FFFFFFFFFFFFFFFFFFFFF  
@A00155:342:HHGFNDSXY:1:1501:15546:17519 1:N:0:GAACCTAG+TCCGCATA  
TGTGTCCACTTAAGGACTCACCTCTGGCCTATGGTCATCTCAATGCCGAGAGGGATGTGGAGGGCGAG

AGAGAGCGACTTCTCTCGGGCCACAGCCTTACAGCTGTGGAGCACGGTATCCTCTGCCGAAACAGAG  
+  
FFFFFFFFFFFFFFFFFFFFFFFFFFFFFFFFFFFFFFFFFFFFFFFFFFFFFFFFFFFFFFFFFFFFFFFF  
FFFFFFFFFFFFFFFFFFFFFFFFFFFFFFFFFFFFFFFFFFFFFFFFFFFFFFFFFFFFFFFFFFFFFFFF  
@A00155:342:HHGFNDSXY:1:1501:20030:34428 1:N:0:GAACCTAG+TCCGCATA  
GGATGTGGAGGGCGAGAGAGAGCGACTTCTCTCGGGCCACAGCCTTACAGCTGTGGAGCACGGTATC  
CTCTGCCGAAACAGAGGTTGGACAAGACCGAGGGGTCTCCTAGTTCCAAAGGAGATGTACTCC  
+  
FFFFFFFFFFFFFFFFFFFFFFFFFFFFFFFFFFFFFFFFFFFFFFFFFFFFFFFFFFFFFFFFFFFFFFFF  
FFFFFFFFFFFFFFFFFFFFFFFFFFFFFFFFFFFFFFFFFFFFFFFFFFFFFFFFFFFFFFFFFFFFFFFF:FFFF  
@A00155:342:HHGFNDSXY:1:1502:27796:2910 1:N:0:GAACCTAG+TCCGCATA  
CTCTGCCGAAACAGAGGTTGGACAAGACCGAGGGGTCTCCTAGTTCCAAAGGAGATGTACTCCGGGC  
TTGTTACAGACCTACCGTGTAAAGTCGTAGTCTAGTAGGCTACCTGACGAGTCCTTTTAGGACGAAAC  
+  
FFFFFFFFFFFFFFFFFFFFFFFFFFFFFFFFFFFFFFFFFFFFFFFFFFFFFFFFFFFFFFFFFFFFFFFF:FFFFFFFFFFFFFFFFFFFF  
FFFFFFFFFFFFFFFFFFFFFFFFFFFFFFFFFFFFFFFFFFFFFFFFFFFFFFFFFFFFFFFFFFFFFFFF:FFFF  
@A00155:342:HHGFNDSXY:1:1502:14262:22874 1:N:0:GAACCTAG+TCCGCATA  
ACCTCTGTTTCGGCAGAGGATACCGTGCTCCACAGCTGTAAGGCTGTGGGCCCGAGAGAAGTCGCTCT  
CTCTCGCCCTCCACATCCCTCTCGGCATTGAGATGACCATAGGCCAGAGGAGAGTCCTTAAGTGGACA  
+  
FFFFFFFFFFFFFFFFFFFFFFFFFFFFFFFFFFFFFFFFFFFFFFFFFFFFFFFFFFFFFFFFFFFF,FFFFFFFF  
FFFFFFFFFFFFFFFFFFFFFFFFFFFFFFFFFFFFFFFFFFFFFFFFFFFFFFFFFFFFFFFFFFFFFFFF:FFFF  
@A00155:342:HHGFNDSXY:1:1502:11605:35399 1:N:0:GAACCTAG+TCCGCATA  
GGATGTGGAGGGCGAGAGAGAGCGACTTCTCTCGGGCCACAGCCTTACAGCTGTGGAGCACGGTATC  
CTCTGCCGAAACAGAGGTTGGACAAGACCGAGGGGTCTCCTAGTTCCAAAGGAGATGTACTCC  
+  
FFF:FFFFFFFFFFFFFFFFFFFFFFFFFFFFFFFFFFFFFFFFFFFFFFFFFFFFFFFFFFFFFFFFFFFF,FFFFFFFFFFFFFFFFFFFF  
FFFFFFFFFFFFFFFFFFFFFFFFFFFFFFFFFFFFFFFFFFFFFFFFFFFFFFFFFFFFFFFFFFFFFFFF  
@A00155:342:HHGFNDSXY:1:1502:10203:36918 1:N:0:GAACCTAG+TCCGCATA  
GGATGTGGAGGGCGAGAGAGAGCGACTTCTCTCGGGCCACAGCCTTACAGCTGTGGAGCACGGTATC  
CTCTGCCGAAACAGAGGTTGGACAAGACCGAGGGGTCTCCTAGTTCCAAAGGAGATGTACTCC  
+  
FFFFFFFFFFFFFFFFFFFFFFFFFFFFFFFFFFFFFFFFFFFFFFFFFFFFFFFFFFFFFFFFFFFF,F:FFFF:FFFFFFFFFFFFFFFF  
FFFFFFFFFFFFFFFFFFFFFFFFFFFFFFFFFFFFFFFFFFFFFFFFFFFFFFFFFFFFFFFFFFFFFFFF  
@A00155:342:HHGFNDSXY:1:1503:20057:3850 1:N:0:GAACCTAG+TCCGCATA  
CTTCTCTCGGGCCACAGCCTTACAGCTGTGGAGCACGGTATCCTCTGCCGAAACAGAGGTTGGACAA  
GACCGGAGGGGTCTCCTAGTTCCAAAGGAGATGTACTCCGGGCTTGTTACGACCTACCGTGTAAAGTC  
+  
FFFFFFFFFFFFFFFFFFFFFFFFFFFFFFFFFFFFFFFFFFFFFFFFFFFFFFFFFFFFFFFFFFFFFFFFFF  
FFFFFFFFFFFFFFFFFFFFFFFFFFFFFFFFFFFFFFFFFFFFFFFFFFFFFFFFFFFFFFFFFFFFFFFF  
@A00155:342:HHGFNDSXY:1:1503:26558:4492 1:N:0:GAACCTAG+TCCGCATA  
ATCTCAATGCCGAGAGGGAGGTGGAGGGCGAGAGAGAGCGACTTCTCTCGGGCCACAGCCTTACAGC  
TGTGGAGCACGGTATCCTCTGCCGAAACAGAGGTTGGACAAGACCGAGGGGTCTCCTAGTTCCAAAG  
+  
FF:F:FFFFFFFFFFFFFFFF,FFFFFFFFFFFFFFFF:FFFFFF:FFFFFFFFFFFFFFFFFFFFFFFF  
FFFF:FF:FFFF:FF:FFFF:FFFFFFFFFFFFFFFFFFFF,FFF:FFFFFFFFFFFFFFFFFFFF  
@A00155:342:HHGFNDSXY:1:1503:23204:7075 1:N:0:GAACCTAG+TCCGCATA  
ACCTCTGTTTCGGCAGAGGATACCGTGCTCCACAGCTGTAAGGCTGTGGGCCCGAGAGAAGTCGCTCT  
CTCTCGCCCTTACATCCCTCTCGGCATTGAGATGACCATAGGCCAGAGGTGAGTCCTTAAGTGGACA  
+  
FFFFFFFFFFFFFFFFFFFFFFFFFFFFFFFFFFFFFFFFFFFFFFFFFFFFFFFFFFFFFFFFFFFF  
FFFFFFFFFFFFFFFFFFFFFFFFFFFFFFFFFFFFFFFFFFFFFFFFFFFFFFFFFFFFFFFFFFFF,FFFFFFFFFFFFFFFFFFFFF:  
@A00155:342:HHGFNDSXY:1:1503:11080:7467 1:N:0:GAACCTAG+TCCGCATA  
CGAGAGGGATGTGGAGGGCGAGAGAGAGCGACTTCTCTCGGGCCACAGCCTTACAAGTGTGGAGCAC

GGTATCCTCTGCCGAAACAGAGGTTGGACAAGACCGGAGGGGTCTCCTAGTTCCAAAGGAGATGTACT  
+  
FFFFFFFFFFFFFFFFFFFFFFFFFFFFFFFFFFFFFFFFFFFFFFFFFFFFFFFFFFFFFFFFFFFFFFFF  
FFFFFFFFFFFFFFFFFFFFFFFFFFFFFFFFFFFFFFFFFFFFFFFFFFFFFFFFFFFFFFFFFFFFFFFF  
@A00155:342:HHGFNDSXY:1:1503:14082:20713 1:N:0:GAACCTAG+TCCGCATA  
TGCCGAGAGGGATGTGGAGGGCGAGAGAGAGCGACTTCTCTCGGGCCACAGCCTTACAGCTGTGGAG  
CACGGTATCCTCTGCCGAAACAGAGGTTGGACAAGACCGGAGGGGTCTCCTAGTTCCAAAGGAGATGT  
+  
FFFFFFFFFFFFFFFFFFFFFFFFFFFFFFFFFFFFFFFFFFFFFFFFFFFFFFFFFFFFFFFFFFFFFFFF  
FFFFFFFFFFFFFFFFFFFFFFFFFFFFFFFFFFFFFFFFFFFFFFFFFFFFFFFFFFFFFFFFFFFFFFFF  
@A00155:342:HHGFNDSXY:1:1503:13476:29183 1:N:0:GAACCTAG+TCCGCATA  
GAGGGCGAGAGAGAGCGACTTCTCTCGGGCCACAGCCTTACAGCTGTGGAGCACGGTATCCTCTGCC  
GAAACAGAGGTTGGACAAGACCGGAGGGGTCTCCTAGTTCCAAAGGAGATGTACTCCGGGCTTGTTCA  
+  
FFFFFFFFFFFFFFFFFFFFFFFFFFFFFFFFFFFFFFFFFFFFFFFFFFFFFFFFFFFFFFFFFFFFFFFF  
FFFFFFFFFFFFFFFFFFFFFFFFFFFFFFFFFFFFFFFFFFFFFFFFFFFFFFFFFFFFFFFFFFFFFFFF  
@A00155:342:HHGFNDSXY:1:1503:5529:32142 1:N:0:GAACCTAG+TCCGCATA  
AGCGACTTCTCTCGGGCCACAGCCTTACAGCTGTGGAGCACGGTATCCTCTGCCGAAACAGAGGTTG  
GACAAGACCGGAGGGGTCTCCTAGTTCCAAAGGAGATGTACTCCGGGCTTGTTACGACCTACCGTGT  
+  
FFFFFFFFFFFFFFFFFFFFFFFFFFFFFFFFFFFFFFFFFFFFFFFFFFFFFFFFFFFFFFFFFFFFFFFF  
FFFFFFFFFFFFFFFFFFFFFFFFFFFFFFFFFFFFFFFFFFFFFFFFFFFFFFFFFFFFFFFFFFFFFFFF  
@A00155:342:HHGFNDSXY:1:1503:22137:35258 1:N:0:GAACCTAG+TCCGCATA  
TGTAGAGGGCGAGAGAGAGCGACTTCTCTCGGGCCACAGCCTTACAGCTGTGGAGCACGGTATCCTC  
TGCCGAAACAGAGGTTGGACAAGACCGGAGGGGTCTCCTAGTTCCAAAGGAGATGTACTCCGGG  
+  
FFFFFFFFFFFFFFFFFFFFFFFFFFFFFFFFFFFFFFFFFFFFFFFFFFFFFFFFFFFFFFFFFFFFFFFF  
FFFFFFFFFFFFFFFFFFFFFFFFFFFFFFFFFFFFFFFFFFFFFFFFFFFFFFFFFFFFFFFFFFFFFFFF  
@A00155:342:HHGFNDSXY:1:1503:22318:35258 1:N:0:GAACCTAG+TCCGCATA  
TGTAGAGGGCGAGAGAGAGCGACTTCTCTCGGGCCACAGCCTTACAGCTGTGGAGCACGGTATCCTC  
TGCCGAAACAGAGGTTGGACAAGACCGGAGGGGTCTCCTAGTTCCAAAGGAGATGTACTCCGGG  
+  
FFFFFFFFFFFFFFFFFFFFFFFFFFFFFFFFFFFFFFFFFFFFFFFFFFFFFFFFFFFFFFFFFFFFFFFF  
FFFFFFFFFFFFFFFFFFFFFFFFFFFFFFFFFFFFFFFFFFFFFFFFFFFFFFFFFFFFFFFFFFFFFFFF  
@A00155:342:HHGFNDSXY:1:1504:6786:3035 1:N:0:GAACCTAG+TCCGCATA  
TCCACTTAAGGACTCACCTCTGGCCTATGGTCATCTCAATGCCGAGAGTGATGTGGAGGGCGAGAGAG  
AGCGACTTCTCTCGGGCCACAGCCTTACAGCTGTGGAGCACGGTATCCTCTGCCGAAACAGAGGTTG  
+  
:FFF:FFFFFFFFFFFFFFFF:FFFFFFFFFFFFFFFF:FF:FFF:,F:FF:FFFF:FFFFFFFF  
FFFFFFFFFFFFFFFF:FFF:FFFFFF,FFF,FFFFFFFF:FFF:FFFFFFFF:FFFFFF:F:F  
@A00155:342:HHGFNDSXY:1:1505:17852:11177 1:N:0:GAACCTAG+TCCGCATA  
TTAAGGACTCTCCTCTGGCCTATGGTCATCTCAATGCCGAGAGGGATGTGGAGGGCGAGAGAGCGA  
CTTCTCTCGGGCCACAGCCTTACAGCTGTGGAGCACGGTATCCTCTGCCGAAACAGAGGTTGGACAA  
+  
FFFFFFFFFFFFFFFFFFFFFFFF:FFFFFFFFFFFFFFFFFFFFFFFFFFFFFFFF:FFFFFFFFFFFF  
FFFFFFFFFFFFFFFFFFFFFFFFFFFFFFFFFFFFFFFFFFFFFFFFFFFFFFFFFFFFFFFFFFFFFFFF  
@A00155:342:HHGFNDSXY:1:1505:16857:24236 1:N:0:GAACCTAG+TCCGCATA  
GCGACTTCTCTCGGGCCACAGCCTTACAGCTGTGGAGCACGGTATCCTCTGCCGAAACAGAGGTTGG  
ACAAGACCGGAGGGGTCTCCTAGTTCCAAAGGAGATGTACTCCGGGCTTGTTACGACCTACCGTGT  
+  
:FFFF:::,F::FFFFFF,FF:,FF:,FFFF:FFFF:,F:FF,F:FF,,FFFFFF:FFFFF  
:FF::FF:,FFFFFFF,,FFF,FF:FFFF:FFFF:F:FFFF:FF,:FF:F:,FF,,FF,,,FF  
@A00155:342:HHGFNDSXY:1:1505:6479:26115 1:N:0:GAACCTAG+TCCGCATA  
ACCTCTGTTTCGGCAGAGGATACCGTGCTCCACAGCTGTAAGGCTGTGGGCCCGAGAGAAGTCGCTCT

CTCTCGCCCTCCACATCCCTCTCGGCATTGAGATGACCATAGGCCAGAGGAGAGTCCTTAAGTGGACA  
+  
FFFFFFFFFFFFFFFFFFFF,FFFFFFFF:FFFFFFFF:FFF:FFFFFFFF:FFFFFFFF:FF:FFFFFFFF  
FFFFFFFFFFFFFFFFFFFFFFFFFFFF,F,FFFFFFFFFFFFFFFFFFFFFFFF:FFFFFFFFFFFF  
@A00155:342:HHGFNDSXY:1:1505:5005:31955 1:N:0:GAACCTAG+TCCGCATA  
ACCTCTGTTTCGGCAGAGGATACCGTGCTCCACAGCTGTAAGGCTGTGGCCCCGAGAGAAGTCGCTCT  
CTCTCGCCCTCCACATCCCTCTCGGCATTGAGATGACCATAGGCCAGAGGAGAGTCCTTAAGTGGACA  
+  
FFFFFFFFFFFFFFFFFFFFFFFF:FFFFFFFFFFFFFFFF,FFFFFFFFFFFFFFFFFFFFFFFFFFFF  
FFFFFFFFFFFFFFFFFFFFFFFFFFFF:FFFFFFFFFFFFFFFFFFFFFFFFFFFFFFFFFFFFFFFFFFFF  
@A00155:342:HHGFNDSXY:1:1506:23095:21668 1:N:0:GAACCTAG+TCCGCATA  
TAGATCAGCTGTGTCCACTTAAGGACTCACCTCTGGCCTATGGTCATCTCTATGCCGAGAGGGATGTG  
GAGGGCGAGAGAGAGCGACTTCTCTCGGGCCCACAGCCTTACAGCTGTGGAGCACGGTATCCTCTGCC  
+  
FFFFFFFFFFFFFFFFFFFFFFFFFFFFFFFFFFFFFFFFFFFFFFFFFFFFFFFFFFFFFFFF:FFFFFF:FFF  
F:FFFFFFFFFFFFFFFFFFFFFFFFFFFFFFFFFFFFFFFFFFFFFFFFFFFFFFFFFFFFFFFF:FFFFFFFF  
@A00155:342:HHGFNDSXY:1:1506:32018:35399 1:N:0:GAACCTAG+TCCGCATA  
TGTCCACTTAAGGACTCTCCTCTGGCCTATGGTCATCTCAATGCCGAGAGGGATGTGGAGGGCGAGAG  
AGAGCGACTTCTCTCGGGCCCACAGCCTTACAGCTGTGGAGCACGGTATCCTCTGCCGAAACAGAGGT  
+  
FFFFFFFFFFFFFFFFFFFFFFFFFFFFFFFFFFFFFFFFFFFFFFFFFFFFFFFFFFFFFFFF:FFFFFFFFFFFF  
FFFFFFFFFFFFFFFFFFFFFFFFFFFFFFFFFFFFFFFFFFFFFFFFFFFFFFFFFFFFFFFF:FFFFFFFFFFFF:FFFF  
@A00155:342:HHGFNDSXY:1:1507:22733:12242 1:N:0:GAACCTAG+TCCGCATA  
TCTCTCGGGCCCACAGCCTTACAGCTGTGGAGCACGGTATCCTCTGCCGAAACAGAGGTTGGACAAGA  
CCGGAGGGGTCTCCTAGTTCCAAAGGAGATGTACTCCGGGCTTGTTACAGACCTACCGTGTAAGTCGT  
+  
FFFFFFFFFFFFFFFFFFFFFFFFFFFFFFFFFFFFFFFFFFFFFFFFFFFFFFFFFFFFFFFF:FF  
FFFFFFFFFFFFFFFFFFFFFFFFFFFFFFFFFFFFFFFFFFFFFFFFFFFFFFFFFFFFFFFFFFFFFFFFFFFF  
@A00155:342:HHGFNDSXY:1:1507:18593:30718 1:N:0:GAACCTAG+TCCGCATA  
CCTTACAGCTGTGGAGCACGGTATCCTCTGCCGAAACAGAGGTTGGACAAGACCGGAGGGGTCTCCTA  
GTTCCAAAGGAGATGTACTCCGGGCTTGTTACAGACCTACCGTGTAAGTCGTAGTCTAGTAGGCTACC  
+  
FF,FFFFFFFFFFFFFFFFFFFFFFFFFFFFFFFFFFFFFFFFFFFFFFFFFFFFFFFFFFFFFFFFFFFF  
FFFFFFFFFFFFFFFFFFFFFFFFFFFF,FFFFFFFFFFFFFFFF:FFFFFFFFFFFFFFFFFFFFFFFF  
@A00155:342:HHGFNDSXY:1:1508:3360:3959 1:N:0:GAACCTAG+TCCGCATA  
GGATGTGGAGGGCGAGAGAGAGCGACTTCTCTCGGGCCCACAGCCTTACAGCTGTGGAGCACGGTATC  
CTCTGCCGAAACAGAGGTTGGACAAGACCGGAGGGGTCTCCTAGTTCCAAAGGAGATGTACT  
+  
FFFFFFFFFFFFFFFFFFFFFFFFFFFFFFFFFFFFFFFFFFFFFFFFFFFFFFFFFFFFFFFFFFFF  
FFFFFFFFFFFFFFFFFFFFFFFF:FFFFFFFFFFFFFFFFFFFFFFFFFFFFFFFF,FFFFFFFFFFFF  
@A00155:342:HHGFNDSXY:1:1508:31530:23312 1:N:0:GAACCTAG+TCCGCATA  
CAATGCCGAGAGGGATGTAGAGGGCGAGAGAGAGCGACTTCTCTCGGGCCCACAGCCTTACAGCTGTG  
GAGCACGGTATCCTCTGCCGAAACAGAGGTTGGACAAGACCGGAGGGGTCTCCTAGTTCCAAAGGAGA  
+  
FFFFFFFFFFFFFFFFFFFFFFFFFFFFFFFFFFFFFFFFFFFFFFFFFFFFFFFFFFFFFFFF:FFFFFFFFFFFF  
FFFFFFFFFFFFFFFFFFFFFFFFFFFFFFFFFFFFFFFFFFFFFFFFFFFFFFFFFFFFFFFFFFFFFFFFFFFF  
@A00155:342:HHGFNDSXY:1:1508:2826:32002 1:N:0:GAACCTAG+TCCGCATA  
CTTCTCTCGGGCCCACAGCCTTACAGCTGTGGAGCACGGTATCCTCTGCCGAAACAGAGGTTGGACAA  
GACCGGAGGGGTCTCCTAGTTCCAAAGGAGATGTACTCCGGACTTGTTACAGACCTACCGTGTA  
+  
FFFFFFFFFFFFFFFFFFFFFFFFFFFF:FFFFFF:FFFFFFFFFFFFFFFFFFFF,FFFFFFFFFFFFFFFFFFFF  
FFFFFFFFFFFFFFFFFFFFFFFFFFFF,FFFFFFFFFFFFFFFF:FFFFFFFFFFFFFFFFFFFFFFFF,  
@A00155:342:HHGFNDSXY:1:1508:5005:35900 1:N:0:GAACCTAG+TCCGCATA  
CTTCTCTCGGGCCCACAGCCTTACAGCTGTGGAGCACGGTATCCTCTGCCGAAACAGAGGTTGGACAA

GACCGGAGGGGTCTCCTAGTTCCAAAGGAGATGTACTCCGGACTTGTTACGACCTACCGTGTA  
+  
FFFFFFFFFFFFFFFFFFFFFFFF,FFF:FFFF:,FFFF,FFFFFFFFFFFFFFFFFFFFFFFFFFFF  
F:FFFFFFFFFFFFFFFFFFFFFFFF:F:FFFFFFFFFFFFFFFFFFFFFFFF:FFFFFFFFFFFFFFF  
@A00155:342:HHGFNDSXY:1:1509:3956:25097 1:N:0:GAACCTAG+TCCGCATA  
TTACAGCTGTGGAGCACGGTATCCTCTGCCGAAAAAGAGGTTGGACAAGACCGGAGGGGTCTCCTAGT  
TCCAAAGGAGATGTACTCCGGGCTTGTTACGACCTACCGTGTAAGTCGTAGTCTAGTAGGCTACCTG  
+  
FFFFFFFFFFFFFFFFFFFFFFFFFFFFFFFF:FFFF:,F:F:FFFFFFFF:FFFFFFFFFFFFFFFFFFFF  
FFF:FFF:FFFFFFFF:FFFFFFFFFFFFFFFF:FFFFF,FFFFFFFF:FF:FFFFFFFFFFFFFF  
@A00155:342:HHGFNDSXY:1:1510:9570:12242 1:N:0:GAACCTAG+TCCGCATA  
AGGGATGTGGAGGGCGAGAGAGAGCGACTTCTCTCGGGCCACAGCCTTACAGCTGTGGAGCACGGTA  
TCCTCTGCCGAAACAGAGGTTGGACAAGACCGGAGGGGTCTCCTAGTTCCAAAGGAAATGTACTCCGG  
+  
FFFFFFFFFFFFFFFFFFFFFFFFFFFFFFFFFFFFFFFFFFFFFFFFFFFFFFFFFFFFFFFF:FFFFFFFFFFFFFFFFFFFF  
FFFFFFFFFFFFFFFFFFFFFFFFFFFFFFFFFFFFFFFFFFFFFFFFFFFFFFFFFFFFFFFFFFFFFFFFFFFF  
@A00155:342:HHGFNDSXY:1:1510:2248:31657 1:N:0:GAACCTAG+TCCGCATA  
GCCGAAACAGAGGTTGGACAAGACCGGAGGGGTCTCCTAGTTCCAAAGGAGATGTACTCCGGGCTTGT  
TCACGACCTACCGTGTAAGTCGTAGTCTAGTAGGCTACCTGACGAGTCCTTTTTAGGACGAAACTTAC  
+  
FFFFFFFFFFFFFFFFFFFFFFFFFFFFFFFFFFFFFFFFFFFFFFFFFFFFFFFFFFFFFFFF,FFFFFFFFFFFFFFFFFFFF  
FFFFFFFFFFFFFFFFFFFFFFFFFFFFFFFFFFFFFFFFFFFFFFFFFFFFFFFFFFFFFFFFFFFFFFFFFFFF  
@A00155:342:HHGFNDSXY:1:1510:2926:31861 1:N:0:GAACCTAG+TCCGCATA  
GCCGAAACAGAGGTTGGACAAGACCGGAGGGGTCTCCTAGTTCCAAAGGAGATGTACTCCGGGCTTGT  
TCACGACCTACCGTGTAAGTCGTAGTCTAGTAGGCTACCTGACGAGTCCTTTTTAGGACGAAACTTAC  
+  
FFFFFFFFFFFFFFFFFFFFFFFFF::FFFFFFFFFFFFFFFFFFFFFFFFFFFFFFFFFFFFFFFFFFFFF  
FFFFFFFFFFFFFFF,FFFFFFFFFFFFFFFFFFFFFFFFFFFFFFFFFFFFFFFFFFFFFFFFFFFFFFFFFFFF  
@A00155:342:HHGFNDSXY:1:1511:3477:11960 1:N:0:GAACCTAG+TCCGCATA  
ATGCCGAGAGGGATGTGGAGGGCGAGAGAGAGCGACTTCTCTCGGGCCACAGCCTTACAGCTGTGGA  
GCACGGTATCCTCTGCCGAAACAGAGGTTGGACAAGACCGGAGGGGTCTCCTAGTTCCAAAGGAGATG  
+  
FFFFFFFFFFFFFFF:FFFFF:F:F,FFFFFFFFFFFFFFFFFFFFFFFF:FFFFF:,FFFFFFFFFFFFFFFF  
FFFFFFFFFFFFFFFFFFFFFFFFF:,FFF,FFFFFFFF:FFFFFFFFFFFF,FFFFFFFFFFFFFFFFFFFF  
@A00155:342:HHGFNDSXY:1:1511:32768:14810 1:N:0:GAACCTAG+TCCGCATA  
TGTGGAGGGCGAGAGAGAGCGACTTCTCTCGGGCCACAGCCTTACAGCTGTGGAGCACGGTATCCTC  
TGCCGAAACAGAGGTTGGACAAGACCGGAGGGGTCTCCTAGTTCCAAAGGAGATGTACTCCGGG  
+  
FFFFFFFFFFFFFFFFFFFFFFFFFFFFFFFFFFFFFFFFFFFFFFFFFFFFFFFFFFFFFFFF:FFFFFFFF  
:FFFFFFFFFFFFFFFFFFFFFFFFFFFFFFFFFFFFFFFFFFFFFFFFFFFFFFFFFFFFFFFFFFFFF  
@A00155:342:HHGFNDSXY:1:1511:2645:16438 1:N:0:GAACCTAG+TCCGCATA  
ATGCCGAGAGGGATGTAGAGGGCGAGAGAGAGCGACTTCTCTCGGGCCACAGCCTTACAGCTGTGGA  
GCACGGTATCCTCTGCCGAAACAGAGGTTGGACAAGACCGGAGGGGTCTCCTAGTTCCAAAGGAGAT  
+  
FFFFF:FFFFFFFFFFFF:FFFFFFFFFFFFFFFF::FFFFF,FFFFFFFFFFFFFFFFFFFFFFFFFFFF  
FF:FFFFFFFFFFFFFFFFFFFFFFFFFFFFFFFFFFFFFFFFFFFFFFFFFFFFFFFFFFFFFFFFFFFF  
@A00155:342:HHGFNDSXY:1:1511:27218:32910 1:N:0:GAACCTAG+TCCGCATA  
TTACAGCTGTGGAGCACGGTATCCTCTGCCGAAACAGAGGTTGGACAAGACCGGAGGGGTCTCCTAGT  
TCCAAAGGAGATGTACTCCGGGCTTGTTACGACCTACCGTGTAAGTCGTAGTCTAATAGGCTACCTG  
+  
,FFFFFFFFFFFFFFFF:FFFFFFFFFFFFFFFFFFFFFFFFFFFFFFFFFFFFFFFF:FFFFFFFFFFFFFFF  
FFFFFFFFFFFFFFFFFFFFFFFFFFFFFFFFFFFFFFFFFFFF:, ,FFFFFFFF:FFFFFFFFFFFF,FFFFF  
@A00155:342:HHGFNDSXY:1:1513:8630:19257 1:N:0:GAACCTAG+TCCGCATA  
GGATGTGGAGGGCGAGAGAGAGCGACTTCTCTCGGGCCACAGCCTTACAGCTGTGGAGCACGGTATC

CTCTGCCGAAACAGAGGTTGGACAAGACCGGAGGGGTCTCCTGGTTCCAAAGGAGATGTACTCC  
+  
FFFFF:FFFFFFFFFFFFF:,FFFFFFFFFFFFF:FFF:FFFFFFFFFFFFFFFFFFFFFFFFFFFFFFFFFFFFF:FF  
FFFFFFFFFFFFFFFFFFFFFFFFFFFFFFFFFFFFFFFFFFFFFFFFFFFFFFFFFFFFFFFFFFFFFFFFFFFF  
@A00155:342:HHGFNDSXY:1:1513:17978:19789 1:N:0:GAACCTAG+TCCGCATA  
GGATGTGGAGGGCGAGAGAGAGCGACTTCTCTCGGGCCACAGCCTTACAGCTGTGGAGCACGGTATC  
CTCTGCCGAAACAGAGGTTGGACAAGACCGGAGGGGTCTCCTGGTTCCAAAGGAGATGTACTCC  
+  
FFFFFFFFFFFFFFFFFFFFFFFFFFFFFFFFFFFFFFFFFFFFFFFFFFFFFFFFFFFFFFFFFFFFFFFFFFFF:FFF  
FFFFFFFFFFFFFFFFFFFFFFFFFFFFFFFFFFFFFFFFFFFFFFFFFFFFFFFFFFFFFFFFFFFFFFFFFFFF  
@A00155:342:HHGFNDSXY:1:1513:17472:22983 1:N:0:GAACCTAG+TCCGCATA  
CTTCTCTCGGGCCACAGCCTTACAGCTGTGGTGCACGGTATCCTCTGCCGAAACAGAGGTTGGACAA  
GACCGGAGGGGTCTCCTAGTTCCAAAGGAGATGTACTCCGGGCTTGTTACGACCTACCGTGTAAGTC  
+  
FFFFFFFFFFFFFFFFFFFFFFFFFFFFFFFFFFFFFFFFFFFFFFFFFFFFFFFFFFFFFFFFFFFFFFFFFFFF  
FFFFFFFFFFFFFFFFFFFFFFFFFFFFFFFFFFFFFFFFFFFFFFFFFFFFFFFFFFFFFFFFFFFFFFFFFFFF  
@A00155:342:HHGFNDSXY:1:1513:11397:31469 1:N:0:GAACCTAG+TCCGCATA  
CACCTCTGGCCTATGGTCATCTCAATGCCGAGAGGGATGTGAAGGGCGAGAGAGAGCGACTTCTCTCG  
GGCCACAGCCTTACAGCTGTGGAGCACGGTATCCTCTGCCGAAACAGAGGTTGGACAAGACCGGAG  
+  
FFFFFFFFFFFFFFFFFFFFFFFFFFFFFFFFFFFFFFFFFFFFF:FFFFFFFFFFFFFFFFFFFFFFFFFFFFF  
FFFFF:FFFFFFFFFFFFFFFFFFFFFFFFFFFFFFFFFFFFF:FFFFF,FFFFF:FFFFF  
@A00155:342:HHGFNDSXY:1:1514:28863:20134 1:N:0:GAACCTAG+TCCGCATA  
TGTTTTCGGCAGAGGATACCGTGCTCCACAGCTGTAAGGCTGTGGGCCGAGAGAAGTCGCTCTCTCTC  
GCCCTCCACATCCCTCTCGGCATTGAGATGACCATAGGCCAGAGGTGAGTCCTTAAGTGACACAGCT  
+  
FFF:FFFFFFFFFFFFFFFFFFFFFFFFFFFFF:FFFFFFFFFFFFFFFFFFFFFFFFFFFFFFFFFFFFF  
FFFFFFFFF:,FFFFFFFFFFFF,FFFFFFFFFF:FFFFFFFFFFFFFFFFFFFFFFFFFFFFFFFFFFFFF  
@A00155:342:HHGFNDSXY:1:1514:7102:23124 1:N:0:GAACCTAG+TCCGCATA  
GAGAGAGCGACTTCTCTCGGGCCACAGCCTTACAGCTGTGGAGCACGGTATCCTCTGCCGAAACAGA  
GGTTGGACAAGACCGGAGGGGTCTCCTAGTTCCAAAGGAGATGTACTCCGGGCTTGTTACGACCTAC  
+  
FFFFFFFFFFFFFFFFFFFFFFFFFFFFFFFFFFFFF:FFFFFFFFFFFFFFFFFFFFFFFFFFFFFFFFFFFFF  
FFFFFFFFFFFFFFFFFFFFFFFFFFFFF:FFFFFFFFFFFFFFFFF,FFFFF:FFFFFFFFFFFFFFFFFFFFF  
@A00155:342:HHGFNDSXY:1:1515:22092:2957 1:N:0:GAACCTAG+TCCGCATA  
GGGCGAGAGAGAGCGACTTCTCTCGGGCCACAGCCTTACAGCTGTGGAGCACGGTATCCTCTGCCGA  
AACAGAGGTTGGACAAGACCGGAGGGGTCTCCTGGTTCCAAAGGAGATGTACTCCGGGC  
+  
FFFFFFFFFFFFFFFFFFFFF:FFFFFFFFFFFFFFFFFFFFFFFFFFFFFFFFFFFFFFFFFFFFFFFFFFFFF  
FFFFFFFFFFFFFFFFFFFFFFFFFFFFF:FFFFFFFFFFFFFFFFFFFFFFFFFFFFFFFFFFFFF  
@A00155:342:HHGFNDSXY:1:1515:18747:14951 1:N:0:GAACCTAG+TCCGCATA  
GCGACTTCTCTCGGGCCACAGCCTTACAGCTGTGGAGCACGGTATCCTCTGCCGAAACAGAGGTTGG  
ACAAGACCGGAGGGGTCTCCTAGTTCCAAAGGAGATGTACTCCGGGCTTGTTACGACCTACCGTGTA  
+  
FFFFFFFFFFFFFFFFFFFFFFFFFFFFFFFFFFFFFFFFFFFFFFFFFFFFFFFFFFFFFFFFFFFFFFFFFFFF:FFFFF  
FFFFFFFFFFFFFFFFFFFFFFFFFFFFFFFFFFFFFFFFFFFFFFFFFFFFFFFFFFFFFFFFFFFFFFFFFFFF  
@A00155:342:HHGFNDSXY:1:1515:11659:18709 1:N:0:GAACCTAG+TCCGCATA  
AGAGAGAGCGACTTCTCTCGGGCCACAGCCTTACAGCTGTGGAGCACGGTATCCTCTGCCGAAACAG  
AGGTTGGACAAGACCGGAGGGGTCTCCTGGTTCCAAAGGAGATGTACTCCGGGCTTGTTACGACCTA  
+  
FFFFFFFFFFFFFFFFFFFFFFFFFFFFFFFFFFFFFFFFFFFFFFFFFFFFFFFFFFFFFFFFFFFFFFFFFFFF  
FFFFFFFFFFFFFFFFFFFFFFFFFFFFFFFFFFFFFFFFFFFFFFFFFFFFFFFFFFFFFFFFFFFFFFFFFFFF  
@A00155:342:HHGFNDSXY:1:1515:19759:20588 1:N:0:GAACCTAG+TCCGCATA  
CTTCTCTCGGGCCACAGCCTTACAGCTGTGGAGCACGGTATCCTCTGCCGAAACAGAGGTTGGACAA

GACCGAGGGGTCTCCTAGTTCCAAAGGAGATGTACTCCGGGCTTGTTACGACCTACCGTGTAAAGTC  
+  
FFFFFFFFFFFFFFFFFFFFFFFFFFFFFFFFFFFFFFFFFFFFFFFFFFFFFFFFFFFFF:FFFFFFFFFFFFFFFFFFFFFFFFFFFFFFFFFFFFF  
:FF:FFFFFFFFFFFFFFFFFFFFFFFFFFFFFFFFFFFFFFFFFFFFFFFFFFFFFFFFFFFFFFFFFFFFFFFFFFFFFFFFFFFFFFFFFFFFF  
@A00155:342:HHGFNDSXY:1:1515:13919:28260 1:N:0:GAACCTAG+TCCGCATA  
ATCTCAATGCCGAGAGGGATGTGGAGGGCGAGAGAGAGCGACTTCTCTCGGGCCCACAGCCTTACAGC  
TGTGGAGCACGGTATCCTCTGCCGAAACAGAGGTTGGACAAGACCGGAGGGGTCTCCTAGTTCCAAAG  
+  
FFFFFFFFFFFFFFFFFFFFFFFFFFFFFFFFFFFFFFFFFFFFFFFFFFFFFFFFFFFFF,FFFFFFFFFFFFFFFFFFFFFFFFFFFFFFFFFFFFF  
FFFFFFFFFFFFFFFFFFFFFFFFFFFFFFFFFFFFFFFFFFFFFFFFFFFFFFFFFFFFFFFFFFFFFFFFFFFFFFFFFFFFFFFFFFFFFFFFFFFFF  
@A00155:342:HHGFNDSXY:1:1516:31774:3881 1:N:0:GAACCTAG+TCCGCATA  
GGATGTGGAGGGCGAGAGAGAGCGACTTCTCTCGGGCCCACAGCCTTACAGCTGTGGAGCACGGTATC  
CTCTGCCGAAACAGAGGTTGGACAAGACCGGAGGGGTCTCCTAGTTCCAAAGGAGATGTACTCC  
+  
FFFFFFFFFFFFFFFFFFFFFFFFFFFFFFFFFFFFFFFFFFFFFFFFFFFFFFFFFFFFFFFFFFFFFFFFFFFFFFFFFFFFFFFFFFFFFFFFFFFFF  
FFFFFFFFFFFFFFFFFFFFFFFFFFFFFFFFFFFFFFFFFFFFFFFFFFFFFFFFFFFFFFFFFFFFFFFFFFFFFFFFFFFFFFFFFFFFFFFFFFFFF  
@A00155:342:HHGFNDSXY:1:1516:13847:25692 1:N:0:GAACCTAG+TCCGCATA  
AGGACTCACCTCTGGCCTATGGTCATCTCAATGCCGAGAGGGATGTGAAGGGCGAGAGAGAGCGACTT  
CTCTCGGGCCCACAGCCTTACAGCTGTGGAGCACGGTATCCTCTGCCGAAACAGAGGTTGGACAAGAC  
+  
FFFFFFFFFFFFFFFFFFFFFFFFFFFFFFFFFFFFFFFFFFFFFFFFFFFFFFFFFFFFFFFFFFFFFFFFFFFFFFFFFFFFFFFFFFFFFFFFFFFFF  
FFFFFFFFFFFFFFFFFFFFFFFFFFFFFFFFFFFFFFFFFFFFFFFFFFFFFFFFFFFFFFFFFFFFFFFFFFFFFFFFFFFFFFFFFFFFFFFFFFFFF  
@A00155:342:HHGFNDSXY:1:1516:22498:25833 1:N:0:GAACCTAG+TCCGCATA  
ACCATAGGCCAGAGGTGAGTCCTTAAGTGGACACAGCTGATCTAAGGCGGTGTAGCGGGGCATGGGTT  
TGAACCCCATGACGGTCGAGTCTAGTAGGCTCCCTGATGAGTCCGTTCCAAGGACGAAACCGTCGT  
+  
FFFFFFFFFFFFFFFFFFFFFFFFFFFFFFFFFFFFFFFFFFFFFFFFFFFFFFFFFFFFFFFFFFFFFFFFFFFFFFFFFFFFFFFFFFFFFFFFFFFFF  
FFFFFFFFFFFFFFFFFFFFFFFFFFFFFFFFFFFFFFFFFFFFFFFFFFFFFFFFFFFFFFFFFFFFFFFFFFFFFFFFFFFFFFFFFFFFFFFFFFFFF  
@A00155:342:HHGFNDSXY:1:1516:20672:25895 1:N:0:GAACCTAG+TCCGCATA  
GAGGGCGAGAGAGAGCGACTTCTCTCGGGCCCACAGCCTTACAGCTGTGGAGCACGGTATCCTCTGCC  
GAAACAGAGGTTGGACAAGACCGGAGGGGTCTCCTAGTTCCAAAGGAGATGTACTCCGGGCTTGTTCA  
+  
FFFFFFFFFFFFFFF:FFFFFFFFFFFFFFFFFFFFFFFFFFFFFFFFFFFFFFFFFFFFFFFFFFFFFFFFFFFFFFFFFFFFFFFFFFFFFFFFFFFFF  
FF:FFF:FF:FFFFFFFFF:F:FFFFFFFFFFFFFFFFFFFFFFFFFFFFFFFFFFFFFFFFFFFFFFFFFFFFFFFFFFFFFFFFFFFFFFFFFFFFF  
@A00155:342:HHGFNDSXY:1:1517:8811:11209 1:N:0:GAACCTAG+TCCGCATA  
TCCACTTAAGGACTCACCTCTGGCCTATGGTCATCTCAATGCCGAGAGGGATGTGAAGGGCGAGAGAG  
AGCGACTTCTCTCGGGCCCACAGCCTTACAGCTGTGGAGCACGGTATCCTCTGCCGAAACAGAGGTTG  
+  
FF:FFFFFFFFFFFFFFFFFFFFFFFFFFFFFFFFFFFFFFFFFFFFFFFFFFFFFFFFFFFFFFFFFFFFFFFFFFFFFFFFFFFFFFFFFFFFFFFFFFFFF  
FFFFFFFFFFFFFFFFFFFFFFFFFFFFFFFFFFFFFFFFFFFFFFFFFFFFFFFFFFFFFFFFFFFFFFFFFFFFFFFFFFFFFFFFFFFFFFFFFFFFF  
@A00155:342:HHGFNDSXY:1:1517:26937:13542 1:N:0:GAACCTAG+TCCGCATA  
ACTTCTCTCGGGCCCACAGCCTTACAGCTGTGGAGCACGGTATCCTCTGCCGAAACAGAGGTTGGACA  
AGACCGGAGGGGTCTCCTAGTTCCAAAGGAGATGTACTCCGGGCTTGTTACGACCTACCGTGTAAAGT  
+  
FFFFFFFFFFFFFFFFFFFFFFFFFFFFFFFFFFFFFFFFFFFFFFFFFFFFFFFFFFFFFFFFFFFFFFFFFFFFFFFFFFFFFFFFFFFFFFFFFFFFF  
FFFFFFFFFFFFFFFFFFFFFFFFFFFFFFFFFFFFFFFFFFFFFFFFFFFFFFFFFFFFFFFFFFFFFFFFFFFFFFFFFFFFFFFFFFFFFFFFFFFFF  
@A00155:342:HHGFNDSXY:1:1517:12554:13745 1:N:0:GAACCTAG+TCCGCATA  
CAATGCCGAGAGGGATGTAGAGGGCGAGAGAGAGCGACTTCTCTCGGGCCCACAGCCTTACAGCTGTG  
GAGCACGGTATCCTCTGCCGAAACAGAGGTTGGACAAGACCGGAGGGGTCTCCTAGTTCCAAAGGAGA  
+  
FFFFFFFFFFFFFFFFFFFFFFFFFFFFFFFFFFFFFFFFFFFFFFFFFFFFFFFFFFFFFFFFFFFFFFFFFFFFFFFFFFFFFFFFFFFFFFFFFFFFF  
FFFFFFFFFFFFFFFFFFFFFFFFFFFFFFFFFFFFFFFFFFFFFFFFFFFFFFFFFFFFFFFFFFFFFFFFFFFFFFFFFFFFFFFFFFFFFFFFFFFFF  
@A00155:342:HHGFNDSXY:1:1517:24867:18537 1:N:0:GAACCTAG+TCCGCATA  
GACTTCTCTCGGGCCCACAGCCTTACAGCTGTGGAGCACGGTATCCTCTGCCGAAACAGAGGTTGGAC

AAGACCGGAGGGGTCTCCTAGTTCCAAAGGAGATGTACTCCGGGCTTGTTACACGACCTACCGTGTAAG  
+  
FFFFFFFFFFFFFFFFFFFFFFFFFFFFFFFFFFFFFFFFFFFFF:FFFFFFFFF:FFFFFFFFFFFFFFFFFFFFFFFFFFFF  
FFFFF:FFFFFFFFFFFFFFF:FFFFFFFFFFFFFFFFFFFFFFFFFFFFFFFFFFFFFFFFFFFFFFFFFFFFFFFFFFFF  
@A00155:342:HHGFNDSXY:1:1518:6686:7435 1:N:0:GAACCTAG+TCCGCATA  
AGGGCGAGAGAGAGCGACTTCTCTCGGGCCCACAGCCTTACAGCTGTGGAGCACGGTATCCTCTGCCG  
AAACAGAGGTTGGACAAGACCGGAGGGGTCTCCTAGTTCCAAAGGAGATGTACTCCGAGCTTGTTAC  
+  
FFFFFFFFFFFFFFFFFFFFFFFFFFFFFFFFFFFFFFFFFFFFFFFFFFFFFFFFFFFFFFFFFFFFFFFFFFFFF:FFFFFFFFF:FFF  
FFFFFF:FFFFFFFFFFFFFFF:FFFFFFFFFFFFFFFFFFFFFFFFFFFFFFFFFFFF:F::FFFFFFFFFFFFFFFFFF  
@A00155:342:HHGFNDSXY:1:1518:23330:9142 1:N:0:GAACCTAG+TCCGCATA  
TGCCGAGAGGGATGTGGAGGGCGAGAGAGAGCGACTTCTCTCGGGCCCACAGCCTTACAGCTGTGGAG  
CACGGTATCCTCTGCCGAAACAGAGGTTGGACAAGACCGGAGGGGTCTCCTAGTTCCAAAGGAGATGT  
+  
FFFFFFF:FFFF,FFFFFFFFFFFFFFFFFFFFFFFFFFFFFFFFFFFFFFFFFFFFFFFFFFFFFFFFFFFFF  
FFFFFFFFFFFFFFFFFFFFFFFFFFFFFFFFFFFFFFFFFFFFFFFFFFFFFFFFFFFFFFFFFFFFFFFFFFFFF  
@A00155:342:HHGFNDSXY:1:1518:25825:11052 1:N:0:GAACCTAG+TCCGCATA  
AGCTGTGTCCACTTAAGGACTCACCTCTGGCCTATGGTCATCTCAATGCCGAGAGGGATGTGAAGGGC  
GAGAGAGAGCGACTTCTCTCGGGCCCACAGCCTTACAGCTGTGGAGCACGGTATCCTCTGCCGAAACA  
+  
FFFFFFFFFFFFFFFFFFFFFFFFFFFF,FFFFFFFFFFFFFFFFFFFFFFFFFFFFFFFFFFFFFFFFFFFFFFFFFFFFF  
FFFFFFFFFFFFFFFFFFFF:FFFFFFFFF,FFFFFFFF,FFFFFFFFFFFFFFFFFFFFFFFFFFFFFFFFFFFF:F,:  
@A00155:342:HHGFNDSXY:1:1518:1425:27132 1:N:0:GAACCTAG+TCCGCATA  
ACCGTCATGGGGGTTCAAACCCATGCCCCGCCACACCGCCTTAGATCAGCTGTGTCCACTTAAGGACT  
CACCTCTGGCCTATGGTCATCTCAATGCCGAGAGGGATGTGGAGGGCGAGAGAGAGCGACTTCTCTCG  
+  
F,FF::FFF,:F:F::FFFFFFFFF:FF:F,:::FFF:::F:F:FF,FF:FFFF:FF:F::F:F:FFFF  
F,,FFFF,,FFF,:FF::,FFF:F,,F,F,,,FFF:FFFFF:,FF:FFFF,FFF,F::,FFFF  
@A00155:342:HHGFNDSXY:1:1519:30400:2253 1:N:0:GAACCTAG+TCCGCATA  
CTCCACATCCCTCTCGGCATTGAGATGACCATAGGCCAGAGGTGAGTCCTTAAGTGGACACAGCTGAT  
CTAAGGCGGTGTGGCGGGCATGGGTTTGAACCCCATGACGGTCGGAGTCTAGTAGGCTCCCTGATG  
+  
FFFFFFF:FFFFFFFFF:FF,FFF:FFFFFFFFFFFFFFFFFFFF:FFFFFFFFFF:FFFFFFFFFFFFFFFFFFFFF  
FFF,FFFFFFFFFFFFFFFFFFFF:FF:FFFFFFFFFFFFFFFFFFFFFFFFFFFFFFFFFFFF:FFFFFFFFFFFFFFFFFF:FF  
@A00155:342:HHGFNDSXY:1:1519:2880:20541 1:N:0:GAACCTAG+TCCGCATA  
CGAGAGAGAGCGACTTCTCTCGGGCCCACAGCCTTACAGCTGTGGAGCACGGTATCCTCTGCCGAAAC  
AGAGGTTGGACAAGACCGGAGGGGTCTCCTAGTTCCAAAGGAGATGTACTCCGGGCTTGTTACGACC  
+  
FFFFFFFFFFFFF:FFFFFFFFFFFFFFFFFFFFFFFFFFFFFFFFFFFF,FF:FFFFFFFFFFFFFFFFFFFFFFFFFFFF,FFFFF  
FFFF,FF:FFFFFFFFF:FFFFF:FFFFFFFFFFFFFFFFFFFFFFFFFFFFFFFFFFFFF:FFFFFFFFFFFFFFFFFFFF  
@A00155:342:HHGFNDSXY:1:1519:3305:27258 1:N:0:GAACCTAG+TCCGCATA  
TAAGTGGACACAGCTGATCTAAGGCGGTGTGGCGGGGCATGGGTTTGAACCCCATGACGGTCGGAGT  
CTAGTAGGCTCCCTGATGAGTCCGTTCCAAGGACGACACCGTCGTTACTCTTCGAGTTGTGTAAGTTT  
+  
FFFFFFFFFFFFFFFFFFFFFFFFFFFFFFFFFFFFFFFFFFFFFFFFFFFFFFFFFFFFFFFFFFFFFFFFFFFFF  
FFFFFFFFFFFFFFFFFFFFFFFFFFFFFFFFFFFFFFFFFFFFF:, :FFFFFFFFF:FFFFFFFFFFFFFFFFFFFFF  
@A00155:342:HHGFNDSXY:1:1519:12029:31093 1:N:0:GAACCTAG+TCCGCATA  
ACCTCTGTTTCGGCAGAGGATACCGTGCTCCACAGCTGTAAGGCTGTGGGCCCGAGAGAAGTCGCTCT  
CTCTCGCCCTTCACATCCCTCTCGGCATTGAGATGACCATAGGCCAGAGGTGAGTCCTTAAGTGGACA  
+  
:FFFFFFFFFFFFFFFFFFFFF,FFFFFFFFF:FFF:FFFFFFFFF:,FFFFFFFF:FFF:FFFFFFFFFFFFF,F:  
:FFF,FFFF,:FFFFFFFFF,FFF:FFF,FFF:,FFFFF:,FFF,FF:FFFFFFFFFFFFFFFFF:,,:F  
@A00155:342:HHGFNDSXY:1:1520:25120:2190 1:N:0:GAACCTAG+TCCGCATA  
CCACATCCCTCTCGGCATTGAGATGACCATAGGCCAGAGGTGAGTCCTTAAGTGGACACAGCTGATCT



AAGGCGGTGTGGCGGGGCATGGGTTTGAACCCCATGACGGTCGGAGTCTAGTAGGCTCCCTGATGAG  
+  
FFFFFFFFFFFFFFFFFFFFFFFFFFFFFFFFFFFFFFFFFFFFFFFFFFFFFFFFFFFFFFFFFFFFFFFFF  
FFFFFFFFFFFFFFFFFFFFFFFFFFFFFFFFFFFFFFFFFFFFFFFFFFFFFFFFFFFFFFFFFFFFFFFFF:  
@A00155:342:HHGFNDSXY:1:1520:17879:6089 1:N:0:GAACCTAG+TCCGCATA  
TCCACTTAAGGACTCACCTCTGGCCTATGGTCATCTCAATGCCGAGAGGGATGTGAAGGGCGAGAGAG  
AGCGACTTCTCTCGGGCCACAGCCTTACAGCTGTGGAGCACGGTATCCTCTGCCGAAACAGAGGTTG  
+  
FFFFFFFFFFFFFFFFFFFFFFFFFFFFFFFFFFFFFFFFFFFFFFFFFFFFFFFFFFFFFFFFFFFFFFFFF  
FFFFFFFFFFFFFFFFFFFFFFFFFFFFFFFFFFFFFFFFFFFFFFFFFFFFFFFFFFFFFFFFFFFFFFFFF:FFFFFFFFFFFFFFFFFFFFFFFFF  
@A00155:342:HHGFNDSXY:1:1520:15456:8187 1:N:0:GAACCTAG+TCCGCATA  
TCCACTTAAGGACTCACCTCTGGCCTATGGTCATCTCAATGCCGAGAGGGATGTGAAGGGCGAGAGAG  
AGCGACTTCTCTCGGGCCACAGCCTTACAGCTGTGGAGCACGGTATCCTCTGCCGAAACAGAGGTTG  
+  
:FFFFFFFFFFFFFFFFFFFFFFFFFFFFFFFFFFFFFFFFFFFFFFFFFFFFFFFFFFFFFFFFFFFFFFFFF:FFFFFFFFFFFF:FFFFFFFFF  
FFF:FFFFFFFFFFFFFFFFFFFFFFFFFFFFFFFFFFFFFFFFFFFFFFFFFFFFFFFFFFFFFFFFFFFFF:FFFFFFFFFFFF:FFF:FFFFFFFFFFFFF:F:FFFFFFFFF  
@A00155:342:HHGFNDSXY:1:1520:3495:10958 1:N:0:GAACCTAG+TCCGCATA  
ATCTCAATGCCGAGAGGGATGTGGAGGGCGAGAGAGAGCGACTTCTCTCGGGCCACAGCCTTACAGC  
TGTGGAGCACGGTATCCTCTGCCGAAACAGAGGTTGACAAGACCGGAGGGGTCTCCTGGTTCCAAAG  
+  
FFFFFFFFFFFF:FF:FF:FFFF,,FFFFFFFFFFFFFFFFFFFF:FF:FFFFFFFFFFFFFFFFFFFFFFFFF:FFFF  
FFFFFFFFFFFFF,FFFFFFFFFFFFFFFFFFFFFFFFFFFFFFFFFFFFFFFFFFFFFFFFFFFFFFFFFFFFF:FFFFFFFFFFFFF  
@A00155:342:HHGFNDSXY:1:1520:21721:23516 1:N:0:GAACCTAG+TCCGCATA  
TGGTCATCTCAATGCCGAGAGGGATGTGGAGGGCGAGAGAGAGCGACTTCTCTCGGGCCACAGCCTT  
ACAGCTGTGGAGCACGGTATCCTCTGCCGAAACAGAGGTTGACAAGACCGGAGGGGTCTCCTAGTTC  
+  
FFFFFFFFFFFFFFFFFFFFFFFFFFFFFFFFFFFFFFFFFFFFFFFFFFFFFFFFFFFFFFFFFFFFFFFFF::  
:FFFFFFFFFFFFFFFFFFFFFFFFFFFFFFFFFFFFFFFFFFFFFFFFFFFFFFFFFFFFFFFFFFFFFFFFF,FFFFFFFFFFFFFFFFFFFFFFFFFFFFFFFFFFFFFFFFFFFFFFFFF  
@A00155:342:HHGFNDSXY:1:1520:4842:26506 1:N:0:GAACCTAG+TCCGCATA  
CCTTACAGCTGTGGAGCACGGTATCCTCTGCCGAAACAGAGGTTGACAAGACCGGAGGGGTCTCCTG  
GTTCCAAAGGAGATGTACTCCGGCTTGTTACAGACCTACCGTGTAAGTCGTAGTCTAGTAGGCTACC  
+  
FFFFFFFFFFFFFFFFFFFFFFFFFFFFFFFFFFFFFFFFFFFFFFFFFFFFFFFFFFFFFFFFFFFFFFFFF  
FFFFFFFFFFFFFFFFFFFFFFFFFFFFFFFFFFFFFFFFFFFFFFFFFFFFFFFFFFFFFFFFFFFFFFFFF  
@A00155:342:HHGFNDSXY:1:1520:7563:34507 1:N:0:GAACCTAG+TCCGCATA  
TATCCTCTGCCGAAACAGAGGTTGACAAGACCGGAGGGGTCTCCTAGTTCCAAAGGAGATGTACTCC  
GGGCTTGTTACAGACCTACCGTGTAAGTCGTAGTCTAGTAGGCTACCTGACGAGTCCTT  
+  
FFFFF:FFFF::FFFFFFFF:FFFFFFFFF,F,FF,FFFFFFFFFFFFFFFFFFFFFFFFF,,FFFFFFFFF,  
,FFFFFFFFFFFF,FFFFF:FFFFF,:FFFFFFFFFFFF,FFFFFFFFF:FFFFFFFFF,FF  
@A00155:342:HHGFNDSXY:1:1521:23005:21324 1:N:0:GAACCTAG+TCCGCATA  
TTAGATCAGCTGTGTCCACTTAAGGACCCACCTCTGGCCTATGGTCATCTCAATGCCGAGAGGGATGT  
GGAGGGCGAGAGAGAGCGACTTCTCTCGGGCCACAGCCTTACAGCTGTGGAGCACGGTATCCTCTGC  
+  
:FFFFFFFFFFFFFFFFFFFFFFFFFFFFFFFFFFFFFFFFFFFFFFFFFFFFFFFFFFFFFFFFFFFFFFFFF  
FFFFFFFFFFFFFFFFFFFFFFFFFFFFFFFFFFFFFFFFFFFFFFFFFFFFFFFFFFFFFFFFFFFFFFFFF  
@A00155:342:HHGFNDSXY:1:1522:23737:20087 1:N:0:GAACCTAG+TCCGCATA  
ACCTCTGTTTCGGCAGAGGATACCGTGCTCCACAGCTGTAAGGCTGTGGGCCCCGAGAGAAGTCGCTCT  
CTCTCGCCCTCCACATCCCTCTCGGCATTGAGATGACCATAGGCCAGAGGAGAGTCCTTAAGTGGACA  
+  
FFFFFFFFFFFFFFFFFFFFFFFFFFFFFFFFFFFFFFFFFFFFFFFFFFFFFFFFFFFFFFFFFFFFFFFFF  
FFFFFFFFFFFFFFFFFFFFFFFFFFFFFFFFFFFFFFFFFFFFFFFFFFFFFFFFFFFFFFFFFFFFFFFFF,F:FFFFFFFFFFFFFFFFFFFFFFFFFFFFFFFFFFFFFFFFF  
@A00155:342:HHGFNDSXY:1:1522:18249:23265 1:N:0:GAACCTAG+TCCGCATA  
TGTGGAGGGCGAGAGAGAGCGACTTCTCTCGGGCCACAGCCTTACAGCTGTGGAGCACGGTATCCTC

TGCCGAAACAGAGGTTGGACAAGACCGGAGGGGTCTCCTAGTTCCAAAGGAGATGTACTCCGGG  
+  
FFFFFFFFFFFFFFFFFFFFFFFFFFFFFFFFFFFFFFFFFFFFFFFFFFFFFFFFFFFFFFFFFFFFFFFF  
FFFFFFFFFFFFFFFFFFFFFFFFFFFFFFFFFFFFFFFFFFFFFFFFFFFFFFFFFFFFFFFFFFFFFFFF  
@A00155:342:HHGFNDSXY:1:1522:16143:26725 1:N:0:GAACCTAG+TCCGCATA  
ATCTCAATGCCGAGAGGGATGTAGAGGGCGAGAGAGAGCGACTTCTCTCGGGCCACAGCCTTACAGC  
TGTGGAGCACGGTATCCTCTGCCGAAACAGAGGTTGGACAAGACCGGAGGGGTCTCCTAGTTCCAAAG  
+  
FFFFFFFFFFFFFFFFFFFFFFFF:FFFFFFFFFFFFFFFFFFFFFFFFFFFFFFFFFFFFFFFFFFFFF  
FFFFFFFFFFFFFFFFFFFFFFFFFFFFFFFFFFFFFFFFFFFFFFFFFFFFFFFFFFFFFFFFFFFFFFFF  
@A00155:342:HHGFNDSXY:1:1522:5656:32424 1:N:0:GAACCTAG+TCCGCATA  
CCTTACAGCTGTGGAGCACGGTATCCTCTGCCGAAACAGAGGTTGGACAAGACCGGAGGGGTCTCCTA  
GTTCCAAAGGAGATGTACTCCGGGCTTGTTACGACCTACCGTGTAAGTCGTAGTCTAG  
+  
FFFFFFFFFFFFFFFFFFFFFFFF:FFFFFF:FFFFFFF,FFFFFFFFFFFFFFFFFFFFFFFFFFFF  
FFFFFFFFFFFFFFFFFFFFFFFFFFFFFFFFFFFFFFFFFFFFFFFFFFFFFFFFFFFFFFFFFFFFFFFF  
@A00155:342:HHGFNDSXY:1:1523:18991:8766 1:N:0:GAACCTAG+TCCGCATA  
ACATCCCTCTCGGCATTGAGATGACCATAGGCCAGAGGTGAGTCCTTAAGTGGACACAGCTGATCTAA  
GGCGGTGTGGCGGGGCATGGGTTTGAACCCCATGACGGTCGGAGTCTAGTAGGCTCCCTGATGAGTC  
+  
F:FF:,F:FFF,F,:F:FFFF:FFFFFFFF:FFFFFFFFFFFFFFFF:F,F:FFF,FF::FF,FFFF  
FF:,FFFFFFFF,F:FFFF,F:FFFFFFFFFFFF:FFFFFF:F,FFFFFFFFF::F,FFFF:FFFF  
@A00155:342:HHGFNDSXY:1:1523:26503:20995 1:N:0:GAACCTAG+TCCGCATA  
TTCTCTCGGGCCACAGCCTTACAGCTGTGGAGCACGGTATCCTCTGCCGAAACAGAGGTTGGACAAG  
ACCGGAGGGGTCTCCTAGTTCCAAAGGAGATGTACTCCGGGCTTGTTACGACCTACCGTGTAAGTC  
+  
FFFFFFFFFFFFFFFFFFFFFFFFFFFFFFFFFFFFFFFFFFFFFFFFFFFFFFFFFFFFFFFFFFFFFFFF  
FFFFFFFFFFFFFFFFFFFFFFFFFFFFFFFFFFFFFFFFFFFFFFFFFFFFFFFFFFFFFFFFFFFFFFFF  
@A00155:342:HHGFNDSXY:1:1524:6126:24471 1:N:0:GAACCTAG+TCCGCATA  
TGTAGAGGGCGAGAGAGAGCGACTTCTCTCGGGCCACAGCCTTACAGCTGTGGAGCACGGTATCCTC  
TGCCGAAACAGAGGTTGGACAAGACCGGAGGGGTCTCCTAGTTCCAAAGGAGATGTACTCCGGG  
+  
FF:FFFFFFFFFFFFFFFFFFFFFFFFFFFFFFFFFFFFFFFFFFFFFFFFFFFFFFFFFFFFFFFFFFFF,FFF:FFFFFFFFFFFF:FFFFF  
FFFFFFFFFFFFFFFFFFFFFFFFFFFFFFFFFFFFFFFFFFFFFFFFFFFFFFFFFFFFFFFFFFFFFFFF  
@A00155:342:HHGFNDSXY:1:1524:1597:26647 1:N:0:GAACCTAG+TCCGCATA  
GTCATCTCAATGCCGAGAGGGATGTAGAGGGCGAGAGAGAGCGACTTCTCTCGGGCCACAGCCTTAC  
AGCTGTGGAGCACGGTATCCTCTGCCGAAACAGAGGTTGGACAAGACCGGAGGGGTCTCCTAGTTCCA  
+  
FFFFFFFFF:FFFF:F:FFFF,FFFF:FFFFFFFFFFFFFFFFFFFFFFFFFFFFFFFFFFFFFFFF:FFFF:FFFF  
FFFFFFFF:FFFF:FFFF:FFFFF:FFFF::FF,FFFFFFFF:FFF,:FFF,FFFF:FF:FFFFFFFF  
@A00155:342:HHGFNDSXY:1:1525:23059:6668 1:N:0:GAACCTAG+TCCGCATA  
AGCGACTTCTCTCGGGCCACAGCCTTACAGCTGTGGAGCACGGTATCCTCTGCCGAAACAGAGGTTG  
GACAAGACCGGAGGGGTCTCCAGTTCCAAAGGAGATGTACTCCGGGCTTGTTACGACCTACCGTGT  
+  
FFFFFFFFFFFFFFFFFFFFFFFFFFFFFFFFFFFFFFFFFFFFFFFFFFFFFFFFFFFFFFFFFFFFFFFF  
FFFFFFFFFFFFFFFFFFFFFFFFFFFFFFFFFFFFFFFFFFFFFFFFFFFFFFFFFFFFFFFFFFFF,F,FFFFFFFFFFFF  
@A00155:342:HHGFNDSXY:1:1525:23068:6872 1:N:0:GAACCTAG+TCCGCATA  
AGCGACTTCTCTCGGGCCACAGCCTTACAGCTGTGGAGCACGGTATCCTCTGCCGAAACAGAGGTTG  
GACAAGACCGGAGGGGTCTCCAGTTCCAAAGGAGATGTACTCCGGGCTTGTTACGACCTACCGTGT  
+  
FFFFFFFFFFFFFFF:FFFFFFFFFFFFFFFFFFFFFFFFFFFFFFFFFFFFFFFFFFFFFFFFFFFFFFFF:FFFFFFFFFFFFFFF  
FFFFFFFFFFFFFFFFFFFFFFFFFFFFFFFFFFFFFFFFFFFFFFFFFFFFFFFFFFFFFFFFFFFFFFFF  
@A00155:342:HHGFNDSXY:1:1525:23077:6887 1:N:0:GAACCTAG+TCCGCATA  
AGCGACTTCTCTCGGGCCACAGCCTTACAGCTGTGGAGCACGGTATCCTCTGCCGAAACAGAGGTTG

GACAAGACCGGAGGGGTCTCCAGTTCCAAAGGAGATGTACTCCGGGCTTGTTACGACCTACCGTGT  
+  
FFFFFFFFFFFFFFFFFFFFFFFFFFFFFFFFFFFFFFFFFFFFFFFFFFFFFFFFFFFFFFFFFFFFFFFF  
FFFFFFFFFFFFFFFFFFFFFFFFFFFFFFFFFFFFFFFFFFFFFFFFFFFFFFFFFFFFFFFFFFFFFFFF  
@A00155:342:HHGFNDSXY:1:1525:9733:12179 1:N:0:GAACCTAG+TCCGCATA  
ACTTCTCTCGGGCCACAGCCTTACAGCTGTGGAGCACGGTATCCTCTGCCGAAACAGAGGTTGGACA  
AGACCGGAGGGGTCTCCTGGTTCCAAAGGAGATGTACTCCGGGCTTGTTACGACCTACCGTGTAAGT  
+  
FF:FFFFFFFFFFFFFFFFFFFFFFFFFFFFFFFFFFFFFFFFFFFFFFFFFFFFFFFFFFFFFFFFFFFF  
FFFFFFFFFFFFFFFFFFFFFFFFFFFFFFFFFFFFFFFFFFFFFFFFFFFFFFFFFFFFFFFFFFFFFFFF  
@A00155:342:HHGFNDSXY:1:1525:29839:13526 1:N:0:GAACCTAG+TCCGCATA  
CTCAATGCCGAGAGGGATGTGGAGGGCGAGAGAGAGCGACTTCTCTCGGGCCACAGCCTTACAGCTG  
TGGAGCACGGTATCCTCTGCCGAAACAGAGGTTGGACAAGACCGGAGGGGTCTCCTAGTTCCAAAGGA  
+  
FF:FFFFFFFFFFFFFFFFFFFFFFFFFFFFFFFFFFFFFFFFFFFFFFFFFFFFFFFFFFFFFFFFFFFF  
FFFFFFFFFFFFFFFFFFFFFFFFFFFFFFFFFFFFFFFFFFFFFFFFFFFFFFFFFFFFFFFFFFFFFFFF  
@A00155:342:HHGFNDSXY:1:1525:24569:22185 1:N:0:GAACCTAG+TCCGCATA  
ACTTCTCTCGGGCCACAGCCTTACAGCTGTGGAGCACGGTATCCTCTGCCGAAACAGAGGTTGGACA  
AGACCGGAGGGGTCTCCTAGTTCCAAAGGAGATGTACTCCGGGCTTGTTACGACCTACCGTGTAAGT  
+  
FFFFFFFFFFFFFFFFFFFFFFFFFFFFFFFFFFFFFFFFFFFFFFFFFFFFFFFFFFFFFFFFFFFF,FFFFFFFFFFFFFFFFFFFFFFFFFFFFFFFFFFFFFFFF  
FFFFFFFFFFFFFFFFFFFFFFFFFFFFFFFFFFFFFFFFFFFFFFFFFFFFFFFFFFFFFFFFFFFFFFFF  
@A00155:342:HHGFNDSXY:1:1525:24388:22279 1:N:0:GAACCTAG+TCCGCATA  
ACTTCTCTCGGGCCACAGCCTTACAGCTGTGGAGCACGGTATCCTCTGCCGAAACAGAGGTTGGACA  
AGACCGGAGGGGTCTCCTAGTTCCAAAGGAGATGTACTCCGGGCTTGTTACGACCTACCGTGTAAGT  
+  
FFFFFFFFFFFFFFFFFFFFFFFFFFFFFFFFFFFFFFFFFFFFFFFFFFFFFFFFFFFFFFFFFFFF,FFFFFFFFFFFFFFFFFFFFFFFFFFFFFFFFFFFFF  
FFFFFFFFFFFFFFFFFFFFFFFFFFFFFFFFFFFFFFFFFFFFFFFFFFFFFFFFFFFFFFFFFFFFFFFF  
@A00155:342:HHGFNDSXY:1:1526:26078:30499 1:N:0:GAACCTAG+TCCGCATA  
GGATGTAGAGGGCGAGAGAGAGCGACTTCTCTCGGGCCACAGCCTTACAGCTGTGGAGCACGGTATC  
CTCTGCCGAAACAGAGGTTGGACAAGACCGGAGGGGTCTCCTAGTTCCAAAGGAGATGTACTCC  
+  
FFF:FFFFFFFFFFFFFFFFFFFF:FF:FFFFF:FFFFFFFFFFFFFFFFFFFFFFFFFFFFFFFFFFFF  
FFFFFFFFFFFFFFFFFFFFFFFFFFFFFFFFFFFFFFFFFFFFFFFFFFFFFFFFFFFFFFFFFFFF:FFFFFFFFFFFFFFFF  
@A00155:342:HHGFNDSXY:1:1527:27760:5259 1:N:0:GAACCTAG+TCCGCATA  
GGATGTGGAGGGCGAGAGAGAGCGACTTCTCTCGGGCCACAGCCTTACAGCTGTGGAGCACGGTATC  
CTCTGCCGAAACAGAGGTTGGACAAGACCGGAGGGGTCTCCTAGTTCCAAAGGAG  
+  
FFFFFFFFFFFFFFFFFFFFFFFFFFFFFFFFFFFFFFFFFFFFFFFFFFFFFFFFFFFFFFFFFFFF,FFFFFFFFFFFFFFFFFFFFFFFFFFFFFFFFFFFF  
FFFFFFFFFFFF:FFFFFFFFFFFFFFFFFFFFFFFFFFFFFFFFFFFFFFFFFFFFFFFFFFFFFFFFFFFF  
@A00155:342:HHGFNDSXY:1:1527:3794:36652 1:N:0:GAACCTAG+TCCGCATA  
TGTCCACTTAAGGACTCACCTCTGGCCTATGGTCATCTCAATGCCGAGAGGGATGTGGAGGGCGAGAG  
AGAGCGACTTCTCTCGGGCCACAGCCTTACAGCTGTGGAGCACGGTATCCTCTGCCGAAACAGAGGT  
+  
FFFFFFFFFFFFFFFFFFFFFFFFFFFFFFFFFFFFFFFFFFFFFFFFFFFFFFFFFFFFFFFFFFFF  
FFFFFFFFFFFFFFFFFFFFFFFFFFFFFFFFFFFFFFFFFFFFFFFFFFFFFFFFFFFFFFFFFFFF:FFFFFFFFFFFFFFFF  
@A00155:342:HHGFNDSXY:1:1527:3812:36714 1:N:0:GAACCTAG+TCCGCATA  
TGTCCACTTAAGGACTCACCTCTGGCCTATGGTCATCTCAATGCCGAGAGGGATGTGGAGGGCGAGAG  
AGAGCGACTTCTCTCGGGCCACAGCCTTACAGCTGTGGAGCACGGTATCCTCTGCCGAAACAGAGGT  
+  
FFFFFFFFFFFFFFFFFFFFFFFFFFFFFFFFFFFFFFFFFFFFFFFFFFFFFFFFFFFFFFFFFFFF:FFFFF,F:FF,FFFFFFFFFFFF  
FFFFFFFFFFFFFFFFFFFFFFFFFFFFFFFFFFFFFFFFFFFFFFFFFFFFFFFFFFFFFFFFFFFF  
@A00155:342:HHGFNDSXY:1:1527:3269:36746 1:N:0:GAACCTAG+TCCGCATA  
TGTCCACTTAAGGACTCACCTCTGGCCTATGGTCATCTCAATGCCGAGAGGGATGTGGAGGGCGAGAG

AGAGCGACTTCTCTCGGGCCACAGCCTTACAGCTGTGGAGCACGGTATCCTCTGCCGAAACAGAGGT  
+  
FFFFFFFFFFFFFFFFFFFFFFFFFFFFFFFFFFFFFFFFFFFFFFFFFFFFFFFFFFFFFFFFFFFFF:FFFFFFFFFFFFFFFFFFFF  
FFFFFFFFFFFFFFFFFFFF,FFFFFFFFFFFFFFFFFFFFFFFFFFFF,FFFFFFFFFFFF:FFFFFFFFFFFFFFFFFFFFFFFF  
@A00155:342:HHGFNDSXY:1:1528:3757:3302 1:N:0:GAACCTAG+TCCGCATA  
TGTCCTTAAGGACTCACCTCTGGCCTATGGTCATCTCAATGCCGAGAGGGATGTGGAGGGCGAGAG  
AGAGCGACTTCTCTCGGGCCACAGCCTTACAGCTGTGGAGCACGGTATCCTCTGCCGAAACAGAGGT  
+  
FFFFFFFFFFFFFFFFFFFFFFFFFFFFFFFFFFFFFFFFFFFFFFFFFFFFFFFFFFFFFFFFFFFF,FFF:F:FFFFFFFFFFFFFFF  
FFFFFFFFFFFFFFFFFFFFFFFFFFFFFFFFFFFFFFFFFFFFFFFFFFFFFFFFFFFFFFFFFFFFF:FFFFFFFFFFFFFFFFFFFF  
@A00155:342:HHGFNDSXY:1:1528:5575:13557 1:N:0:GAACCTAG+TCCGCATA  
GTGTCCACTTAAGGACTCACCTCTGGCCTATGGTCATCTCAATGCCGAGAGGGATGTAGAGGGCGAGA  
GAGAGCGACTTCTCTCGGGCCACAGCCTTACAGCTGTGGAGCACGGTATCCTCTGCCGAAACAGAGG  
+  
F:FFFFFFFFFFFFFFFFF:FFFFFFFFFFFFFFFFFFFF,FFFFFFFFFFFFFFFFFFFFFFFFFFFFFFFFFFFFFFFFFFFFF  
FFFFFFFFFFFFFFFFFFFFFFFFFFFFFFFFFFFFFFFFFFFFFFFFFFFFFFFFFFFFFFFFFFFFF:FFFFFFFFFFFF:F:FFFFFFFFFFFFFFFFFFFF,FFFFFFFFFFFFFFFFFFFFF  
@A00155:342:HHGFNDSXY:1:1528:27715:32017 1:N:0:GAACCTAG+TCCGCATA  
GAGAGGGATGTAGAGGGCGAGAGAGAGCGACTTCTCTCGGGCCACAGCCTTACAGCTGTGGAGCACG  
GTATCCTCTGCCGAAACAGAGGTTGGACAAGACCGGAGGGGTCTCCTAGTTCAAAGGAGATGTACTC  
+  
FFFFFFFFFFFFFFFFFFFFFFFFFFFF:FFFFFFF:FFFFFFF:FFFFFFFFFFFFFFFFFFFFFFFFFFFFFFFFFFFFF  
FFFFFFFFFFFFFFFFFFFFFFFFFFFFFFFFFFFFFFFFFFFFFFFFFFFFFFFFFFFFFFFFFFFFF:FFFFFFFFFFFFF:FFFFFFFFFFFFFFFFFFFFFFFFFFFFF,FFFFFFFFFFFFFFFFFFFFF  
@A00155:342:HHGFNDSXY:1:1529:29297:1344 1:N:0:GAACCTAG+TCCGCATA  
TGTCCTTAAGGACTCACCTCTGGCCTATGGTCATCTCAATGCCGAGAGGGATGTGGAGGGCGAGAG  
AGAGCGACTTCTCTCGGGCCACAGCCTTACAGCTGTGGAGCACGGTATCCTCTGCCGAAACAGAGGT  
+  
FFFFFFFFFFFFFFFFFFFFFFFFFFFFFFFFFFFF:FFFFFFFFFFFFFFFFFFFFF:FFFFFFF:FFF:FFFFFFFFFFFF:FFFF  
FFFFFFFFFFFFFFFFFFFFF:FFFFFFFFFFFFFFFFFFFFF:FFFFFFFFFFFF:FFFFFFFFFFFFFFFFFFFFFFFFFFFFF  
@A00155:342:HHGFNDSXY:1:1529:8006:5995 1:N:0:GAACCTAG+TCCGCATA  
GTATCCTCTGCCGAAACAGAGGTTGGACAAGACCGGAGGGGTCTCCTAGTTCAAAGGAGATGTACTC  
CGGGCTTGTTACGACCTACCGTGTAAGTCGTAGTCTAGTAGGCTACCTGACGAGTCCTTTTTAGG  
+  
FFFFFFFFFFFFFFFFFFFFFFFFFFFFFFFFFFFFF:FFFFFFFFFFFFFFFFFFFFFFFFFFFFFFFFFFFFFFFFFFFFF  
FFFFFFFFFFFFFFFFFFFFFFFFFFFFFFFFFFFFFFFFFFFFFFFFFFFFFFFFFFFFFFFFFFFF,FFFFFFFFFFFFFFFFFFFFF:FFFFF  
@A00155:342:HHGFNDSXY:1:1529:22996:7717 1:N:0:GAACCTAG+TCCGCATA  
TCCGGTCTTGTTCAACCTCTGTTTCGGCAGAGGATACCGTGCTCCACAGCTGTAAGGCTGTGGGCCCCG  
AGAGAAGTCGCTCTCTCTCGCCCTTCACATCCCTCTCGGCATTGAGATGACCATAGGCCAGAGGTGAG  
+  
FFFFFFFFFFFFFFFFFFFFFFFFFFFFFFFFFFFFF:FFFFFFFFFFFFFFFFFFFFFFFFFFFFFFFFFFFFFFFFFFFFF  
FFFFF:FFFFF:FFFFFFFFFFFFFFFFFFFFFFFFFFFFFFFFFFFFF,F:FFFFFFFFFFFFFFFFFFFFFFFFFFFFF  
@A00155:342:HHGFNDSXY:1:1529:3251:9095 1:N:0:GAACCTAG+TCCGCATA  
ACCATAGGCCAGAGGTGAGTCCTTAAGTGGACACAGCTGATCTAAGGCGGTGTAGCGGGGCATGGGTT  
TGAACCCCATGACGGTCGGAGTCTAGTAGGCTCCCTGATGAGTCCGTTCAAAGGACGAAACCGTCGT  
+  
FFFFFFFFFFFFFFFFFFFFFFFFFFFFFFFFFFFFF:FFFFFFFFFFFFFFFFFFFFFFFFFFFFFFFFFFFFFFFFFFFFF  
FFFFFFFFFFFFFFFFFFFFFFFFFFFFFFFFFFFFFFFFFFFFFFFFFFFFFFFFFFFFFFFFFFFFF,FFF  
@A00155:342:HHGFNDSXY:1:1529:29460:10895 1:N:0:GAACCTAG+TCCGCATA  
CCTTACAGCTGTGGAGCACGGTATCCTCTGCCGAAACAGAGGTTGGACAAGACCGGAGGGGTCTCCTA  
GTTCAAAGGAGATGTACTCCGGGCTTGTTACGACCTACCGTGTAAGTCGTAGTCTAGTAGGCTACC  
+  
FF:F:FFFFFFFFFFFFFFFFF:FFFFFFFFFFFFFFFFFFFFFFFFFFFFFFFFFFFFF:FFFFFFFFFFFFFFFFFFFFF  
FFFFFFFFFFFFFFFFFFFFFFFFFFFFFFFFFFFFFFFFFFFFFFFFFFFFFFFFFFFFFFFFFFFFF:FFFFFFFFFFFFF:FF:FFFFFFFFF  
@A00155:342:HHGFNDSXY:1:1529:31665:15781 1:N:0:GAACCTAG+TCCGCATA  
GAGCGACTTCTCTCGGGCCACAGCCTTACAGCTGTGGAGCACGGTATCCTCTGCCGAAACAGAGGTT

GACAAGACCGGAGGGGTCTCCTAGTTCCAAAGGAGATGTACTCCGGGCTTGTTACACGACCTACCGTG  
+  
FFFFFFFFFFFFFFFFFFFFFFFFFFFFFFFFFFFFFFF:FFFFFFFFFFFFFFFFFFFFFFFFFFFFFFFFFFFF  
FFFFFFFFFFFFFFFFFFFFFFFFFFFFFFFFFFFFFFFFFFFFFFFFFFFFFFFFFFFFFFFFFFFFFFFFFFFFFFFFFF  
@A00155:342:HHGFNDSXY:1:1529:9227:35227 1:N:0:GAACCTAG+TCCGCATA  
GAGGGCGAGAGAGAGCGACTTCTCTCGGGCCCACAGCCTTACAGCTGTGGAGCACGGTATCCTCTGCC  
GAAACAGAGGTTGGACAAGACCGGAGGGGTCTCCTAGTTCCAAAGGAGATGTACTCCGGGCTTGTTCA  
+  
FFFFFFFFFFFFFFFFFFFFFFFFFFFFFFFFFFFFFFFFFFFFFFF:FFFFFFFFFFFFFFFFFFFFFFFFFFFFF  
FFFFFFFFFFFFFFFFFFFFFFFFFFFFFFFFFFFFFFFFFFFFFFFFFFFFFFFFFFFFFFFFFFFFFFFFFFFFFFFFFF  
@A00155:342:HHGFNDSXY:1:1530:9543:22279 1:N:0:GAACCTAG+TCCGCATA  
CACTTAAGGACTCACCTCTGGCCTATGGTCATCTCAATGCCGAGAGGGATGTGAAGGGCGAGAGAGAG  
CGACTTCTCTCGGGCCCACAGCCTTACAGCTGTGGAGCACGGTATCCTCTGCCGAAACAGAGGT  
+  
FFFFFFFFFFFFFFFFFFFFFFFFFFFFFFFFFFFFFFFFFFFFFFFFFFFFFFF:FFFFFFFFFFFFFFFFFFFFFFFFF  
FFFFFFFFFFFFFFFFFFFFFFFFFFFFFFFFFFFFFFFFFFFFFFFFFFFFFFFFFFFFFFFFFFFFFFFFFFFFFFFFFF  
@A00155:342:HHGFNDSXY:1:1530:1841:22811 1:N:0:GAACCTAG+TCCGCATA  
AAGGACTCTCCTCTGGCCTATGGTCATCTCAATGCCGAGAGGGATGTGGAGGGCGAGAGAGAGCGACT  
TCTCTCGGGCCCACAGCCTTACAGCTGTGGAGCACGGTATCCTCTGCCGAAACAGAGGTTGGACAAGA  
+  
FFFFFFFFFFFFFFFFFFFFFFFFFFFFFFFFFFFFFFFFFFFFFFFFFFFFFFF:FFFFFFFFFFFF:F  
FFFFFFFFFFFFFFFFFFFFFFFF,FFFF:FFFFFFFFFFFFFFFFFFFFFFFF,FFFFF,FFFFFFFF:FFFFF  
@A00155:342:HHGFNDSXY:1:1530:11559:26960 1:N:0:GAACCTAG+TCCGCATA  
TATCCTCTGCCGAAACAGAGGTTGGACAAGACCGGAGGGGTCTCCTAGTTCOAAGGGAGATGTACTCC  
GGGCTTGTTACGACCTACCGTGTAAAGTCGTAGTCTAGTAGGCTACCTGACGAGTCCTTTTTAGGACG  
+  
FFFFFFFFFFFFF:FFFFFFFFFFFFFFFFFFFFFFFFFFFFFFFFFFFFFFF:FFFFFFFFFFFFFFFF,F  
FFFFFFFFFFFFFFFFFFFFFFFFFFFFFFFFFFFFFFFFFFFFFFFFFFFFFFF:FFFFFFFFFFFFFFFFF:FFFFF:  
@A00155:342:HHGFNDSXY:1:1530:10673:27117 1:N:0:GAACCTAG+TCCGCATA  
AGGGCGAGAGAGAGCGACTTCTCTCGGGCCCACAGCCTTACAGCTGTGGAGCACGGTATCCTCTGCCG  
AAACAGAGGTTGGACAAGACCGGAGGGGTCTCCTGGTTCCAAGGAGATGTACTCCGGGCTTGTTAC  
+  
FFFFFFFFFFFFFFFFFFFFFFFF,FFFFFFFF:FFFFFFFFFFFFFF,FFFF:FFFF:F,FFFFFFFFFFFFFFFF  
FFFFFFFF,FFFFFFFF,FFFFFFFF:FFFFFFFF:FFF,FFFFFFFFFFFFFFFF,FFFFFFFF:FF  
@A00155:342:HHGFNDSXY:1:1531:27127:21605 1:N:0:GAACCTAG+TCCGCATA  
CTCAATGCCGAGAGGGATGTGGAGGGCGAGAGAGAGCGACTTCTCTCGGGCCCACAGCCTTTCAGCTG  
TGGAGCACGGTATCCTCTGCCGAAACAGAGGTTGGACAAGACCGGAGGGGTCTCCTAGTTCCAAGGA  
+  
FFFFFFFFFFFFFFFFFFFFFFFFFFFFFFF,FF:FFFFFFFFFFFFFFFFFFFFFFFFFFFFFFFFFFFFFFF:FFFFFFFFF  
FFFFFFFFFFFFFFFFFFFFFFFFFFFFFFFFFFFFFFFFFFFFFFFFFFFFFFFFFFFFFFFFFFFFFFFFFFFFFFFFFF  
@A00155:342:HHGFNDSXY:1:1531:20139:23688 1:N:0:GAACCTAG+TCCGCATA  
GAGAGCGACTTCTCTCGGGCCCACAGCCTTACAGCTGTGGAGCACGGTATCCTCTGCCGAAACAGAGG  
TTGGACAAGACCGGAGGGGTCTCCTAGTTCOAAGGAGATGTACTCCGGCATGTTACGACCTACCG  
+  
FFFFFFFFFFFFFFFFFFFFFFFFFFFFFFFFFFFFFFFFFFFFFFFFFFFFFFFFFFFFFFFFFFFFFFFFFFFFFFFFFF  
FFFFFFFFFFFFFFFFFFFFFFFFFFFFFFFFFFFFFFFFFFFFFFFFFFFFFFFFFFFFFFFFFFFFFFFFFFFFFFFFFF  
@A00155:342:HHGFNDSXY:1:1531:29749:34788 1:N:0:GAACCTAG+TCCGCATA  
GGCGAGAGAGAGCGACTTCTCTCGGGCCCACAGCCTTACAGCTGTGGAGCACGGTATCCTCTGCCGAA  
ACAGAGGTTGGACAAGACCGGAGGGGTCTCCTAGTTCOAAGGAGATGTACTCCGGGCTTGTTACGA  
+  
FFFFFFFFFFFFFFFFFFFFFFFFFFFFFFFFFFFFFFFFFFFFFFFFFFFFFFFFFFFFFFFFFFFFFFFFFFFFFFFFFF  
FFFFFFFFFFFFFFFFFFFFFFFFFFFFFFFFFFFFFFFFFFFFFFFFFFFFFFFFFFFFFFFFFFFFFFFFFFFFFFFFFF  
@A00155:342:HHGFNDSXY:1:1532:9064:1595 1:N:0:GAACCTAG+TCCGCATA  
TCAATGCCGAGAGGGATGTAGAGGGCGAGAGAGAGCGACTTCTCTCGGGCCCACAGCCTTACAGCTGT

GGAGCACGGTATCCTCTGCCGAAACAGAGGTTGGACAAGACCGGAGGGGTCTCCTAGTTCCAAAGGAG  
+  
FFFFFFFFFFFFFFFF:FFFFFFFF:FFFFFFFF:F,FFF::F,F:FFFFFFFF:F:FFFFFFFF:F  
FFFF:FFFFFFFFFFFFFFFF:FFFFFFF,:FFFFFF:FF:F:FFFF,FFFFFFFFFFFFFFFF:F  
@A00155:342:HHGFNDSXY:1:1532:31186:11318 1:N:0:GAACCTAG+TCCGCATA  
CACCTCTGGCCTATGGTCATCTCAATGCCGAGAGGGATGTGAAGGGCGAGAGAGAGCGACTTCTCTCG  
GGCCACAGCCTTACAGCTGTGGAGCACGGTATCCTCTGCCGAAACAGAGGTTGGACAAGACCGGAG  
+  
FFFFFFFFFFFFFFFF:FFFFFFFF:FFFFFFF:FFFFFFFFFFFFFFFFFFFFFFFFFFFFFFFFFFFFF  
FFFFFFFFFFFFFFFFFFFFFFFFFFFFFFFFFFFFFFFFFFFFFFFFFFFFFFFFFFFFFFFFFFFFF  
@A00155:342:HHGFNDSXY:1:1532:22525:24283 1:N:0:GAACCTAG+TCCGCATA  
CGAGAGGGATGTAGAGGGCGAGAGAGAGCGACTTCTCTCGGGCCACAGCCTTACAGCTGTGGAGCAC  
GGTATCCTCTGCCGAAACAGAGGTTGGACAAGACCGGAGGGGTCTCCTAGTTCCAAAGGAGATGTACT  
+  
FF::FFFFFFFFFFFFFFFFFFFFFFFFFFFFFFFFFFFFFFFFFFFFFFFFFFFFFFFFFFFFFFFFF  
FFFFFFFFFFFF:FFFFFFFFFFFFFFFF:FFFFFFFFFFFFFFFFFFFFFFFFFFFFFFFFFFFFF  
@A00155:342:HHGFNDSXY:1:1532:31774:25614 1:N:0:GAACCTAG+TCCGCATA  
CCGAGAGGGATGTGAGGGCGAGAGAGAGCGACTTCTCTCGGGCCACAGCCTTACAGCTGTGGAGCA  
CGGTATCCTCTGCCGAAACAGAGGTTGGACAAGACCGGAGGGGTCTCCTAGTTCCAAAGGAGATGTAC  
+  
FFFFFFFFFFFFFFFFFFFFFFFFFFFFFFFFFFFFFFFFFFFFFFFFFFFFFFFFFFFFFFFFFFFF:FFFFFFFFFFFFF  
FFFFFFFFFFFFFFFFFFFFFFFFFFFFF:FFF,FF:FFFFFFFFFFFFFFFFFFFFFFFFFFFFFFFFF  
@A00155:342:HHGFNDSXY:1:1532:26449:30608 1:N:0:GAACCTAG+TCCGCATA  
GAGCGACTTCTCTCGGGCCACAGCCTTACAGCTGTGGAGCACGGTATCCTCTGCCGAAACAGAGGTT  
GGACAAGACCGGAGGGGTCTCCTAGTTCCAAAGGAGATGTACTCCGGGCTTGTTACGACCTACCGTG  
+  
FFFFFFFFFFFFFFFFFFFFFFFFFFFFFFFFFFFFFFFFFFFFFFFFFFFFFFFFFFFFFFFFFFFFF  
FFFFFFFFFFFFFFFFFFFFFFFFFFFFF:FFF,FF:FFFFFFFFFFFFFFFFFFFFFFFFFFFFFFFFF  
@A00155:342:HHGFNDSXY:1:1532:8712:33113 1:N:0:GAACCTAG+TCCGCATA  
GGATGTGAGGGCGAGAGAGAGCGACTTCTCTCGGGCCACAGCCTTACAGCTGTGGAGCACGGTATC  
CTCTGCCGAAACAGGGGTTGGACAAGACCGGAGGGGTCTCCTAGTTCCAAAGGAGATGTACTCC  
+  
FFFFF:FF:FFFF:FFFFFFFFFFFFFFFFFFFFF:FFFFFFFFFFFF:F:FFFFFFFFFFFFFFFF:FF  
FFFFFFFFFFFFFFFFFFFFFFFFFFFFFFFFFFFFF:FFFFFFFFFFFFFFFFFFFFFFFFFFFFFFFFF  
@A00155:342:HHGFNDSXY:1:1534:14787:11068 1:N:0:GAACCTAG+TCCGCATA  
AAGGACTCTCCTCTGGCCTATGGTCATCTCAATGCCGAGAGGGATGTGGAGGGCGAGAGAGAGCGACT  
TCTCTCGGGCCACAGCCTTACAGCTGTGGAGCACGGTATCCTCTGCCGAAACAGAGGTTGGACAAGA  
+  
FFFFFFFFFFFFFFFFFFFFF:FFFFFFFFFFFFFFFFFFFFFFFFFFFFFFFFFFFFFFFFFFFFFFFFF  
FFFFFFFFFFFFFFFFFFFFF,FFFFFFFFFFFFFFFFFFFFFFFFFFFFFFFFFFFFF:FFFFFFFFFFFFF  
@A00155:342:HHGFNDSXY:1:1534:13810:18584 1:N:0:GAACCTAG+TCCGCATA  
TATCCTCTGCCGAAACAGAGGTTGGACAAGACCGGAGGGGTCTCCTGGTTCCAAAGGAGATGTACTCC  
GGGCTTGTTACGACCTACCGTGTAAGTCGTAGTCTAGTAGGCTACCTGACGAGTCCTTTTAGGACG  
+  
FFFFFFFFFFFFFFFFFFFFFFFFFFFFFFFFFFFFFFFFFFFFFFFFFFFFFFFFFFFFFFFFFFFFF  
FFFFFFFFFFFFFFFFFFFFFFFFFFFFFFFFFFFFFFFFFFFFFFFFFFFFFFFFFFFFFFFFFFFFF  
@A00155:342:HHGFNDSXY:1:1535:8079:9251 1:N:0:GAACCTAG+TCCGCATA  
GGATGTGAGGGCGAGAGAGAGCGACTTCTCTCGGGCCACAGCCTTACAGCTGTGGAGCACGGTATC  
CTCTGCCGAAACAGAGGTTGGACAAGACCGGAGGGGTCTCCTAGTTCCAAAGGAGATGTACTCC  
+  
F:F:FF:FFFFFFFFFFFF:FFFFFFF,FFFFF,F,FFFFFFFFFFFF,FFF:::F:FF:FFF:FFFFF  
:,FFFFFFFF:FF:FFFF:F:FFFF,FFF:FFF:FFFF:,FFFF,FFFFFFFF::FFFFF  
@A00155:342:HHGFNDSXY:1:1535:25382:16485 1:N:0:GAACCTAG+TCCGCATA  
CTTCTCTCGGGCCACAGCCTTACAGCTGTGGAGCACGGTATCCTCTGCCGAAACAGAGGTTGGACAA

GACCGGAGGGGTCTCCTAGTTCCAAAGGAGATGTACTCCGGGCTTGTTACGACCTACCGTGTAAGTC  
+  
FFFFFFFFFFFF:FFFFFFFFFFFF::FFFF,FFFFFFFFFFFFFFFFFFFFFFFFFFFFFFFFFFFFFFFFFFFFFFFFFFFF:FFF  
FFFFFFFFFFFFFFFFFFFFFFFFFFFFFFFFFFFFFFFFFFFFFFFFFFFFFFFFFFFFFFFFFFFFFFFFFFFFFFFFFFFF:FFF  
@A00155:342:HHGFNDSXY:1:1535:15194:23578 1:N:0:GAACCTAG+TCCGCATA  
CTCAATGCCGAGAGGGATGTGGAGGGCGAGAGAGAGCGACTTCTCTCGGGCCCACAGCCTTACAGCTG  
TGGAGCACGGTATCCTCTGCCGAAACAGAGGTTGGACAAGACCGGAGGGGTCTCCTAGTTCCAAAGGA  
+  
FFFFFFFFFFFFF:FFFF:F:FFFFFFFFFFFFFFFFFFFFFFFFFFFFFFFFFFFF:F:FFFFFFFFFFFFFFFFFFFFFFFFFFFF  
FFFFFFFFFFFFFFFFFFFFFFFFFFFFFFFFFFFFFFFFFFFFFFFFFFFFFFFFFFFFFFFFFFFFFFFFFFFFFFFFFFFF,FFFF  
@A00155:342:HHGFNDSXY:1:1535:15727:24314 1:N:0:GAACCTAG+TCCGCATA  
TGCCGAGAGGGATGTAGAGGGCGAGAGAGAGCGACTTCTCTCGGGCCCACAGCCTTACAGCTGTGGAG  
CACGGTATCCTCTGCCGAAACAGAGGTTGGACAAGACCGGAGGGGTCTCCTAGTTCCAAAGGAGATGT  
+  
FFFFFFFFFFFFFFFFFFFFFFFFFFFFFFFFFFFFFFFFFFFFFFFFFFFFFFFFFFFFFFFFFFFFFFFFFFFF:FFFFFFFFFF  
FFFFFFFFFFFFFFFFFFFFFFFFFFFFFFFFFFFFFFFFFFFFFFFFFFFFFFFFFFFFFFFFFFFFFFFFFFFFFFFFFFFF  
@A00155:342:HHGFNDSXY:1:1535:6099:27993 1:N:0:GAACCTAG+TCCGCATA  
GTCATCTCAATGCCGAGAGGGATGTGGAGGGCGAGAGAGAGCGACTTCTCTCGGGCCCACAGCCTTAC  
AGCTGTGGAGCACGGTATCCTCTGCCGAAACAGAGGTTGGACAAGACCGGAGGGGTCTCCTAGTTCCA  
+  
FFFFFFFFFFFFFFFFFFFFF:FFFF:FFFFFFFFFFFF,FFFFFFFFFFFFFFFFFFFFFFFFFFFFFFFFFFFFFFFFFFFFF  
FFFFFFFFFFFFFFFFFFFFFFFFFFFFFFFFFFFFFFFFFFFFFFFFFFFFFFFFFFFFFFFFFFFFFFFFFFFFFFFFFFFF  
@A00155:342:HHGFNDSXY:1:1535:23213:28917 1:N:0:GAACCTAG+TCCGCATA  
ATCTCAATGCCGAGAGGGATGTAGAGGGCGAGAGAGAGCGACTTCTCTCGGGCCCACAGCCTTACAGC  
TGTGGAGCACGGTATCCTCTGCCGAAACAGAGGTTGGACAAGACCGGAGGGGTCTCCTAGTTCCAAAG  
+  
FFFFFFFFFFFFFFFFFFFFFFFFFFFFF:F:FFFFFFFFFFFFFFFFFFFFFFFFFFFFFFFFFFFFFFFFFFFFFFFFFFFFF  
FFFFFFFFFFFFFFFFFFFFFFFFFFFFFFFFFFFFFFFFFFFFFFFFFFFFFFFFFFFFFFFFFFFFFFFFFFFFFFFFFFFF  
@A00155:342:HHGFNDSXY:1:1535:6632:29700 1:N:0:GAACCTAG+TCCGCATA  
GTCATCTCAATGCCGAGAGGGATGTGGAGGGCGAGAGAGAGCGACTTCTCTCGGGCCCACAGCCTTAC  
AGCTGTGGAGCACGGTATCCTCTGCCGAAACAGAGGTTGGACAAGACCGGAGGGGTCTCCTAGTTCCA  
+  
FFFFFFFFFFFFFFFFFFFFFFFFFFFFFFFFFFFFFFFFFFFFFFFFFFFFFFFFFFFFFFFFFFFFFFFFFFFFF  
FFFFFFFFFFFFFFFFFFFFFFFFFFFFFFFFFFFFFFFFFFFFFFFFFFFFFFFFFFFFFFFFFFFFFFFFFFFFFFFFFFFF  
@A00155:342:HHGFNDSXY:1:1535:17083:33552 1:N:0:GAACCTAG+TCCGCATA  
GGATGTGGAGGGCGAGAGAGAGCGACTTCTCTCGGGCCCACAGCCTTACAGCTGTGGAGCACGGTATC  
CTCTGCCGAAACAGAGGTTGGACAAGACCGGAGGGGTCTCCTAGTTCCAAAGGAGATGTACTCC  
+  
FFFFFFFFFFFFFFFFFFFFFFFFFFFFFFFFFFFFFFFFFFFFFFFFFFFFFFFFFFFFFFFFFFFFFFFFFFFFF  
FFFFFFFFFFFFFFFFFFFFFFFFFFFFFFFFFFFFFFFFFFFFFFFFFFFFFFFFFFFFFFFFFFFFFFFFFFFFFFFFFFFF  
@A00155:342:HHGFNDSXY:1:1536:7817:2065 1:N:0:GAACCTAG+TCCGCATA  
CAGCCTTACAGCTGTGGAGCACGGTATCCTCTGCCGAAACAGAGGTTGGACAAGACCGGAGGGGTCTC  
CTGTTCCAAAGGAGATGTACTCCGGGCTTGTTACGACCTACCGTGTAAGTCGTAGTCTAGTAGGCT  
+  
FFFFFFFFFFFFFFFFFFFFFFFFFFFFFFFFFFFFFFFFFFFFFFFFFFFFFFFFFFFFFFFFFFFFFFFFFFFFF  
FFFFFFFFFFFF:FFFFFFFFFFFFFFFFFFFFF:FFFFFFFFFFFFFFFFFFFFFFFFFFFFFFFFFFFF:FFFF:FFFF  
@A00155:342:HHGFNDSXY:1:1536:20564:9392 1:N:0:GAACCTAG+TCCGCATA  
CGAGAGAGAGCGACTTCTCTCGGGCCCACAGCCTTACAGCTGTGGAGCACGGTATCCTCTGCCGAAAC  
AGAGGTTGGACAAGACCGGAGGGGTCTCCTAGTTCCAAAGGAGATGTACTCCGGGCTTGTTACGACC  
+  
FFFFFFFFFFFFF:F:FFFFFFFFF::F:FFFFFFFFFFFFFFFFFFFF:FFFFFFFF:FFFFFFFFFFFFFFFFFFFFF  
FFFFFFFFFFFFFFFFFFFFFFFFFFFFFFFFFFFFFFFFFFFF:FFFFFFFFFFFFFFFFFFFFFFFFFFFFFFFFFFFFF  
@A00155:342:HHGFNDSXY:1:1536:14841:29700 1:N:0:GAACCTAG+TCCGCATA  
GGATGTGGAGGGCGAGAGAGAGCGACTTCTCTCGGGCCCACAGCCTTACAGCTGTGGAGCACGGTATC

CTCTGCCGAAACAGAGGTTGGACAAGACCGGAGGGGTCTCCTGGTTCCAAAGGAGATGTACTCC  
+  
FFFFFFFFFFFFFFFFFFFFFFFFFFFFFFFFFFFFFFFFFFFFFFFFFFFFFFFFFFFFFFFFFFFFFFFF  
FFFFFFFFFFFFFFFFFFFFFFFFFFFFFFFFFFFFFFFFFFFFFFFFFFFFFFFFFFFFFFFFFFFFFFFF  
@A00155:342:HHGFNDSXY:1:1537:6099:3787 1:N:0:GAACCTAG+TCCGCATA  
CTTCTCTCGGGCCCACAGCCTTACAGCTGTGGAGCACGGTATCCTCTGCCGAAACAGAGGTTGGACAA  
GACCGGAGGGGTCTCCTAGTTCCAAAGGAGATGTACTCCGGGCTTGTTACAGACCTACCGTGTAAGTC  
+  
FFFFFFFFFFFFFFFFFFFFFFFFFFFFFFFFFFFFFFFFFFFFFFFFFFFFFFFFFFFFFFFFFFFFFFFF  
FFFFFFFFFFFFFFFFFFFFFFFFFFFFFFFFFFFFFFFFFFFFFFFFFFFFFFFFFFFFFFFFFFFFFFFF,FFF  
@A00155:342:HHGFNDSXY:1:1537:7075:7294 1:N:0:GAACCTAG+TCCGCATA  
CTCAATGCCGAGAGGGATGTGGAGGGCGAGAGAGAGCGACTTCTCTCGGGCCCACAGCCTTACAGCTG  
TGGAGCACGGTATCCTCTGCCGAAACAGAGGTTGGACAAGACCGGAGGGGTCTCCTAGTTCCAAAGGA  
+  
FFFFFFFFFFFFFFFFFFFFFFFFFFFFFFFFFFFFFFFFFFFFFFFFFFFFFFFFFFFFFFFFFFFFFFFF  
FFFFFFFFFFFFFFFFFFFFFFFFFFFFFFFFFFFFFFFFFFFFFFFFFFFFFFFFFFFFFFFFFFFFFFFF:FFF  
@A00155:342:HHGFNDSXY:1:1537:7527:13338 1:N:0:GAACCTAG+TCCGCATA  
CTTCTCTCGGGCCCACAGCCTTACAGCTGTGGAGCACGGTATCCTCTGCCGAAACAGAGGTTGGACAA  
GACCGGAGGGGTCTCCTAGTTCCAAAGGAGATGTACTCCGGGCTTGTTACAGACCTACCGTGTAAGTC  
+  
FFFFFFFFFFFFFFFFFFFFFFFFFFFFFFFFFFFFFFFFFFFFFFFFFFFFFFFFFFFFFFFFFFFFFFFF  
FFFFFFFFFFFFFFFFFFFFFFFFFFFFFFFFFFFFFFFFFFFFFFFFFFFFFFFFFFFFFFFFFFFFFFFF:FF  
@A00155:342:HHGFNDSXY:1:1537:14950:17394 1:N:0:GAACCTAG+TCCGCATA  
CTTCTCTCGGGCCCACAGCCTTACAGCTGTGGAGCACGGTATCCTCTGCCGAAACAGAGGTTGGACAA  
GACCGGAGGGGTCTCCTGGTTCCAAAGGAGATGTACTCCGGGCTTGTTACAGACCTACCGTGTAAGTC  
+  
FFFFFFFFFFFFFFFFFFFFFFFFFFFFFFFFFFFFFFFFFFFFFFFFFFFFFFFFFFFFFFFFFFFFFFFF  
:FFFFFFFFFFFFFFFFFFFFFFFFFFFFFFFFFFFFFFFFFFFFFFFFFFFFFFFFFFFFFFFFFFFFFFFF  
@A00155:342:HHGFNDSXY:1:1537:12355:25958 1:N:0:GAACCTAG+TCCGCATA  
CTTCTCTCGGGCCCACAGCCTTACAGCTGTGGAGCACGGTATCCTCTGCCGAAACAGAGGTTGGACAA  
GACCGGAGGGGTCTCCTGGTTCCAAAGGAGATGTACTCCGGGCTTGTTACAGACCTACCGTGTAAGTC  
+  
FFFFFFFFFFFFFFFFFFFFFFFFFFFFFFFFFFFFFFFFFFFFFFFFFFFFFFFFFFFFFFFFFFFFFFFF  
FFFFFFFFFFFFFFFFFFFFFFFFFFFFFFFFFFFFFFFFFFFFFFFFFFFFFFFFFFFFFFFFFFFFFFFF:F  
@A00155:342:HHGFNDSXY:1:1538:22426:3724 1:N:0:GAACCTAG+TCCGCATA  
CAAGCCCGGAGTACATCTCCTTTGGAAGTACTAGAGACCCCTCCGGTCTTGTTCAACCTCTGTTTCGGCA  
GAGGATACCGTGCTCCACAGCTGTAAGGCTGTGGGCCCGAGAGAAGTCGCTCTCTCGCCCTCCACA  
+  
FFFFFFFFFFFFFFFFFFFFFFFFFFFFFFFFFFFFFFFFFFFFFFFFFFFFFFFFFFFFFFFFFFFFFFFF:FFF  
FFFFFFFFFFFF:FFFFFFFFFFFF:FFFFFFFFFFFFFFFFFFFFFFFFFFFFFFFFFFFFFFFFFFFFF:  
@A00155:342:HHGFNDSXY:1:1538:2112:14638 1:N:0:GAACCTAG+TCCGCATA  
GAGCGACTTCTCTCGGGCCCACAGCCTTACAGCTGTGGAGCACGGTATCCTCTGCCGAAACAGAGGTT  
GGACAAGACCGGAGGGGTCTCCTAGTTCCAAAGGAGATGTACTCCGGGCTTGTTACAGAC  
+  
FFFFFFF:FFFF:FFFFFFFFFFFFFFFFFFFFFFFFFFFFFFFFFFFFFFFFFFFFFFFFFFFFFFFFF  
FFFFFFFFFFFFFFFFFFFFFFFFFFFFFFFFFFFFFFFFFFFFFFFFFFFFFFFFFFFFFFFFFFFFFFFF  
@A00155:342:HHGFNDSXY:1:1538:5186:35243 1:N:0:GAACCTAG+TCCGCATA  
CTCTCGCCCTCCACATCCCTCTCGGCATTGAGATGACCATAGGCCAGAGGTGAGTCCTTAAGTGGACA  
CAGCTGATCTAAGGCGGTGTGGCGGGGCATGGGTTTGAACCCCATGACGGTCGGAGTCTAGTAGGCT  
+  
FFFFFFFFFFFFFFFFFFFFFFFFFFFFFFFFFFFFFFFFFFFFFFFFFFFFFFFFFFFFFFFFFFFFFFFF  
FFFFFFFFFFFFFFFFFFFFFFFFFFFFFFFFFFFFFFFFFFFFFFFFFFFFFFFFFFFFFFFFFFFFFFFF:FFF  
@A00155:342:HHGFNDSXY:1:1539:4987:1611 1:N:0:GAACCTAG+TCCGCATA  
CTCTGGCCTATGGTCATCTCAATGCCGAGAGGGATGTGAAGGGCGAGAGAGAGCGACTTCTCTCGGGC



CCACAGCCTTACAGCTGTGGAGCACGGTATCCTCTGCCGAAACAGAGGTTGGACAAGACCGGAGGGGT  
+  
FFFFFFFFFFFFFFFFFFFFFFFF:FFFFFF,FFF,,FFFF:FFFFFFFFFFFFFFFFFFFFFFFFFFFF  
FFFF,FFFF,F:FFFFFFFFFFFFFFFF:FFFFFF:FFFF:FF:FFFFFFFFFFFFFFFFFFFFFFFF  
@A00155:342:HHGFNDSXY:1:1539:27245:6433 1:N:0:GAACCTAG+TCCGCATA  
GAGAGGGATGTAGAGGGCGAGAGAGAGCGACTTCTCTCGGGCCACAGCCTTACAGCTGTGGAGCACG  
GTATCCTCTGCCGAAACAGAGGTTGGACAAGACCGGAGGGGTCTCCTAGTTCCAAAGGAGATGTACTC  
+  
FFFFFFFFFFFFFFFFFFFFFFFF:FFFFFFFFFFFFFFFFFFFFFFFFFFFFFFFF:FF,FFFFFFFFFFFF  
FFF:FFFFFFFFFFFFFFFFFFFFFFFFFFFFFFFF:FFFF:FFFFFFFFFFFFFFFFFFFFFFFFFFFF  
@A00155:342:HHGFNDSXY:1:1539:2202:11819 1:N:0:GAACCTAG+TCCGCATA  
TGTGGAGGGCGAGAGAGAGCGACTTCTCTCGGGCCACAGCCTTACAGCTGTGGAGCACGGTATCCTC  
TGCCGAAACAGAGGTTGGACAAGACCGGAGGGGTCTCCTAGTTCCAAAGGAGATGTACTCCGGG  
+  
FFFFFFFFFFFFFFFFFFFFFFFFFFFFFFFFFFFFFFFF:FFFFFFFFFFFFFFFFFFFFFFFFFFFF  
FFFFFFFFFFFFFFFFFFFFFFFFFFFFFFFFFFFFFFFFFFFFFFFF:FFFFFFFFFFFFFFFFFFFF  
@A00155:342:HHGFNDSXY:1:1539:15664:20228 1:N:0:GAACCTAG+TCCGCATA  
GAGAGGGATGTGGAGGGCGAGAGAGAGCGACTTCTCTCGGGCCACAGCCTTACAGCTGTGGAGCACG  
GTATCCTCTGCCGAAACAGAGGTTGGACAAGACCGGAGGGGTCTCCTAGTTCCAAAGGAGATGTACTC  
+  
FFFFFFFFFFFFFFFFFFFFFFFFFFFFFFFFFFFFFFFFFFFFFFFFFFFFFFFFFFFFFFFFFFFFFFFFFFFF  
FFFFFFFFFFFFFFFFFFFFFFFF,FFFFFFFFFFFFFFFFFFFFFFFFFFFFFFFFFFFFFFFFFFFFFFFF:FFFFF  
@A00155:342:HHGFNDSXY:1:1539:28357:21292 1:N:0:GAACCTAG+TCCGCATA  
CGACTTCTCTCGGGCCACAGCCTTACAGCTGTGGAGCACGGTATCCTCTGCCGAAACAGAGGTTGGA  
CAAGACCGGAGGGGTCTCCTGGTTCCAAAGGAGATGTACTCCGGGCTTGTTACGACCTACCGTG  
+  
FFFFFFFFFFFFFFFFFFFFFFFFFFFFFFFF:FFFFFFFFFFFFFF:FFFFFFFFFFFFFFFFFFFFFFFF:FFFF  
FFFFFFFFFFFFFFFFFFFFFFFF,FFFFFF:FFFFFFFFFFFFFFFFFFFFFFFFFFFFFFFF:FFF  
@A00155:342:HHGFNDSXY:1:1540:30680:2268 1:N:0:GAACCTAG+TCCGCATA  
TGCTCCACAGCTGTAAGGCTGTGGGCCCAGAGAAAGTCGCTCTCTCGCCCTCCACATCCCTCTCGG  
CATTGAGATGACCATAGGCCAGAGGTGAGTCCTTAAGTGGACACAGCTGATCTAAGGCGGTGTGGC  
+  
FFFFFFFFFFFFFFFFFFFFFFFFFFFFFFFFFFFFFFFFFFFFFFFFFFFFFFFFFFFFFFFFFFFFFFFFFFFF  
FF:FFFFFFFFFFFFFFFFFFFFFFFFFFFFFFFFFFFFFFFFFFFFFFFFFFFFFFFFFFFFFFFFFFFF  
@A00155:342:HHGFNDSXY:1:1540:18728:6151 1:N:0:GAACCTAG+TCCGCATA  
CTTCTCTCGGGCCACAGCCTTACAGCTGTGGAGCACGGTATCCTCTGCCGAAACAGAGGTTGGACAA  
GACCGGAGGGGTCTCCTAGTTCCAAAGGAGATGTACTCCGGGCTTGTTACGACCTACCGTGTAAGTC  
+  
FFFFFFFFFFFFFFFFFFFFFFFFFFFFFFFFFFFFFFFFFFFFFFFFFFFFFFFFFFFFFFFFFFFFFFFFFFFF  
FFFFFFFFFFFFFFFFFFFFFFFFFFFFFFFFFFFFFFFFFFFFFFFFFFFFFFFFFFFFFFFFFFFFFFFFFFFF  
@A00155:342:HHGFNDSXY:1:1540:18647:7952 1:N:0:GAACCTAG+TCCGCATA  
CTTCTCTCGGGCCACAGCCTTACAGCTGTGGAGCACGGTATCCTCTGCCGAAACAGAGGTTGGACAA  
GACCGGAGGGGTCTCCTAGTTCCAAAGGAGATGTACTCCGGGCTTGTTACGACCTACCGTGTAAGTC  
+  
FFFFFFFFFFFFFFFFFFFFFFFFFFFFFFFFFFFFFFFFFFFFFFFF:FFFFFFFFFFFFFFFFFFFFFFFFFFFF  
FFFFFFFFFFFFFFFFFFFFFFFF:FFFFFFFFFFFFFF:FFFFFFFFFFFFFFFFFFFFFFFFFFFFFFFFFFFF  
@A00155:342:HHGFNDSXY:1:1540:16685:12790 1:N:0:GAACCTAG+TCCGCATA  
GAGCGACTTCTCTCGGGCCACAGCCTTAACTGTGGAGCACGGTATCCTCTGCCGAAACAGAGGTT  
GGACAAGACCGGAGGGGTCTCCTAGTTCCAAAGGAGATGTACTCCGGGCTTGTTACGACCTACCGTG  
+  
FFFFFFFFFFFFFFFFFFFFFFFFFFFFFFFFFFFFFFFFFFFFFFFFFFFFFFFFFFFFFFFFFFFFFFFFFFFF  
FFFFFFFFFFFFFFFFFFFFFFFFFFFFFFFFFFFFFFFFFFFFFFFFFFFFFFFFFFFFFFFFFFFFFFFFFFFF:  
@A00155:342:HHGFNDSXY:1:1540:5963:30201 1:N:0:GAACCTAG+TCCGCATA  
TCTCTCGGGCCACAGCCTTACAGCTGTGGAGCACGGTATCCTCTGCCGAAACAGAGGTTGGACAAGA

CCGGAGGGGTCTCTGGTTCCAAAGGAGATGTACTCCGGGCTTGTTACGACCTACCGTGTAAGTCGT  
+  
FFFFFFFFFFFFFFFFFFFFFFFFFFFFFFFFFFFFFFFFFFFFFFFFFFFFFFFFFFFFFFFFFFFFFFFF  
FFFFFFFFFFFFFFFFFFFFFFFFFFFFFFFFFFFFFFFFFFFFFFFFFFFFFFFFFFFFFFFFFFFFFFFF  
@A00155:342:HHGFNDSXY:1:1540:6596:33082 1:N:0:GAACCTAG+TCCGCATA  
AGCGACTTCTCTCGGGCCACAGCCTTACAGCTGTGGAGCACGGTATCCTCTGCCGAAACAGAGGTTG  
GACAAGACCGGAGGGGTCTCCTAGTTCCAAAGGAGATGTACTCCGGGCTTGTTACGACCTACCGTGT  
+  
FFFFFFFFFFFFFFFFFFFFFFFFFFFFFFFFFFFFFFFFFFFFFFFFFFFFFFFFFFFFFFFFFFFFFFFF  
FFFFFFFFFFFFFFFFFFFFFFFFFFFFFFFFFFFFFFFFFFFFFFFFFFFFFFFFFFFFFFFFFFFFFFFF  
@A00155:342:HHGFNDSXY:1:1541:17716:15452 1:N:0:GAACCTAG+TCCGCATA  
CTCTGGCCTATGGTCATCTCAATGCCGAGAGGGATGTGGAGGGCGAGAGAGAGCGACTTCTCTCGGC  
CCACAGCCTTACAGCTGTGGAGCACGGTATCCTCTGCCGAAACAGAGGTTGGACAAGACCGGAGGGT  
+  
FFFFFFFFFFFFFFFFFFFFFFFFFFFFFFFFFFFFFFFFFFFFFFFFFFFFFFFFFFFFFFFFFFFFFFFF  
FFFFFFFFFFFFFFFFFFFFFFFFFFFFFFFFFFFFFFFFFFFFFFFFFFFFFFFFFFFFFFFFFFFFFFFF  
@A00155:342:HHGFNDSXY:1:1541:25012:18850 1:N:0:GAACCTAG+TCCGCATA  
CACCTCTGGCCTATGGTCATCTCAATGCCGAGAGGGATGTAGAGGGCGAGAGAGAGCGACTTCTCTCG  
GGCCACAGCCTTACAGCTGTGGAGCACGGTATCCTCTGCCGAAACAGAGGTTGGACAAGACCGGAGG  
+  
FFFFFFFFFFFFFFFFFFFFFFFFFFFFFFFFFFFFFFFFFFFFFFFFFFFFFFFFFFFFFFFFFFFFFFFF  
FFFFFFFFFFFFFFFFFFFFFFFFFFFFFFFFFFFFFFFFFFFFFFFFFFFFFFFFFFFFFFFFFFFFFFFF  
@A00155:342:HHGFNDSXY:1:1541:12355:22013 1:N:0:GAACCTAG+TCCGCATA  
ACTACGACTTACACGGTAGGTCTGAACAAGCCCGAGTACATCTCCTTTGGAAGTACAGAGACCCCTC  
CGGTCTTGTCCAACCTCTGTTTCGGCAGAGGATACCGTGCTCCACAGCTGTAAGGCTGTGGGCCCGAG  
+  
FFFFFFFFFFFFFFFFFFFFFFFFFFFFFFFFFFFFFFFFFFFFFFFFFFFFFFFFFFFFFFFFFFFFFFFF  
FFFFFFFFFFFFFFFFFFFFFFFFFFFFFFFFFFFFFFFFFFFFFFFFFFFFFFFFFFFFFFFFFFFFFFFF  
@A00155:342:HHGFNDSXY:1:1541:27172:28541 1:N:0:GAACCTAG+TCCGCATA  
TCCCTCTCGGCATTGAGATGACCATAGGCCAGAGGTGAGTCCTTAAGTGGACACAGCTGATCTAAGGC  
GGTGTGGCGGGGCATGGGTTTAAACCCCATGACGGTCGGAGTCTAGTAGGCTCCCTGATG  
+  
FFFFFFFFFFFFFFFFFFFFFFFFFFFFFFFFFFFFFFFFFFFFFFFFFFFFFFFFFFFFFFFFFFFFFFFF  
FFFFFFFFFFFFFFFFFFFFFFFFFFFFFFFFFFFFFFFFFFFFFFFFFFFFFFFFFFFFFFFFFFFFFFFF  
@A00155:342:HHGFNDSXY:1:1541:19569:30686 1:N:0:GAACCTAG+TCCGCATA  
TGTTTCGGCAGAGGATACCGTGCTCCACAGCTGTAAGGCTGTGGGCCCGAGAGAAGTCGCTCTCTCTC  
GCCCTCCACATCCCTCTCGGCATTGAGATGACCATAGGCCAGAGGTGAGTCCTTAAGTGGACACAGCT  
+  
FFFFFFFFFFFFFFFFFFFFFFFFFFFFFFFFFFFFFFFFFFFFFFFFFFFFFFFFFFFFFFFFFFFFFFFF  
FFFFFFFFFFFFFFFFFFFFFFFFFFFFFFFFFFFFFFFFFFFFFFFFFFFFFFFFFFFFFFFFFFFFFFFF  
@A00155:342:HHGFNDSXY:1:1542:15121:14184 1:N:0:GAACCTAG+TCCGCATA  
GGGATGTGGAGGGCGAGAGAGAGCGACTTCTCTCGGGCCACAGCCTTACAGCTGTGGAGCACGGTAT  
CCTCTGCCGAAACAGAGGTTGGACAAGACCGGAGGGGTCTCCTGGTTCCAAAGGAGATGTACTCCGGG  
+  
FFFFFFFFFFFFFFFFFFFFFFFFFFFFFFFFFFFFFFFFFFFFFFFFFFFFFFFFFFFFFFFFFFFFFFFF  
FFFFFFFFFFFFFFFFFFFFFFFFFFFFFFFFFFFFFFFFFFFFFFFFFFFFFFFFFFFFFFFFFFFFFFFF  
@A00155:342:HHGFNDSXY:1:1542:28420:22623 1:N:0:GAACCTAG+TCCGCATA  
ACCTCTGTTTCGGCAGAGGATACCGTGCTCCACAGCTGTAAGGCTGTGGGCCCGAGAGAAGTCGCTCT  
CTCTCGCCCTCCACATCCCTCTCGGCATTGAGATGACCATAGGCCAGAGGAGAGTCCTTAAGTGGACA  
+  
FFFFFFFFFFFFFFFFFFFFFFFFFFFFFFFFFFFFFFFFFFFFFFFFFFFFFFFFFFFFFFFFFFFFFFFF  
FFFFFFFFFFFFFFFFFFFFFFFFFFFFFFFFFFFFFFFFFFFFFFFFFFFFFFFFFFFFFFFFFFFFFFFF  
@A00155:342:HHGFNDSXY:1:1542:12472:24878 1:N:0:GAACCTAG+TCCGCATA  
AGAGAGAGCGACTTCTCTCGGGCCACAGCCTTACAGCTGTGGAGCACGGTATCCTCTGCCGAAACAG

AGGTTGGACAAGACCGGAGGGGTCTCCTAGTTCCAAAGGAGATGTACTCCGGGCTTGTTACGACCT  
+  
FFFFFFFFFFFFFFFFFFFFFFFFFFFFFFFFFFFFFFFFFFFFFFFFFFFFFFFFFFFFFFFFFFFFFFFF  
FFFFFFFFFFFFFFFFFFFFFFFFFFFFFFFFFFFFFFFFFFFFFFFFFFFFFFFFFFFFFFFFFFFFFFFF  
@A00155:342:HHGFNDSXY:1:1542:26069:24972 1:N:0:GAACCTAG+TCCGCATA  
AGGGCGAGAGAGAGCGACTTCTCTCGGGCCCACAGCCTTACAGCTGTGGAGCACGGTATCCTCTGCCG  
AAACAGAGGTTGGACAAGACCGGAGGGGTCTCCTAGTTCCAAAGGAGATGTACTCCGGGCTTGTTAC  
+  
FFFFFFFFFFFFFFFFFFFFFFFFFFFFFFFFFFFFFFFFFFFFFFFFFFFFFFFFFFFFFFFFFFFFFFFF  
FFFFFFFFFFFFFFFFFFFFFFFFFFFFFFFFFFFFFFFFFFFFFFFFFFFFFFFFFFFFFFFFFFFFFFFF  
@A00155:342:HHGFNDSXY:1:1542:6497:27712 1:N:0:GAACCTAG+TCCGCATA  
GATGTGGAGGGCGAGAGAGAGCGACTTCTCTCGGGCCCACAGCCTTACAGCTGTGGAGCACGGTATCC  
TCTGCCGAAACAGAGGTTGGACAAGACCGGAGGGGTCTCCTAGTTCCAAAGGAGATGTACTCCGGGCT  
+  
FFFFFFFFFFFFFFFFFFFFFFFFFFFFFFFFFFFFFFFFFFFFFFFFFFFFFFFFFFFFFFFFFFFFFFFF  
FFFFFFFFFFFFFFFFFFFFFFFFFFFFFFFFFFFFFFFFFFFFFFFFFFFFFFFFFFFFFFFFFFFFFFFF  
@A00155:342:HHGFNDSXY:1:1542:2266:27868 1:N:0:GAACCTAG+TCCGCATA  
CTTCTCTCGGGCCCACAGCCTTACAGCTGTGGAGCACGGTATCCTCTGCCGAAACAGAGGTTGGACAA  
GACCGGAGGGGTCTCCTAGTTCCAAAGGAGATGTACTCCGGGCTTGTTACGACCTACCGTGTAAG  
+  
FFFFFFFFFFFFFFFFFFFFFFFFFFFF,FFFF:FFFFFFFFFFFFFFFFFFFFFFFFFFFFFFFFFFFF  
FFFFFFFFFFFFFFFFFFFFFFFFFFFFFFFFFFFFFFFFFFFFFFFFFFFFFFFFFFFFFFFFFFFFFFFF  
@A00155:342:HHGFNDSXY:1:1542:23240:32471 1:N:0:GAACCTAG+TCCGCATA  
TCCTCTGCCGAAACAGAGGTTGGACAAGACCGGAGGGGTCTCCTGTTCCAAAGGAGATGTACTCCGG  
GCTTGTTACGACCTACCGTGTAAGTCGTAGTCTAGTAGGCTACCTGACGAGTCCTTTTTAGGACGAA  
+  
FFF,F:FFFFF,FFFFFFFF:FFFFFFFFFFFFFFFFFFFFFFFFFFFFFFFFFFFFFFFFFFFF:FFFF:FFFFFFFFFF  
FF:,F,FFFFFFFFFF,FF,FFFFF,FFFFFFFFFFFF,FFFFF:FFFFFFFFFFFF:F,,FFFFFFFF:F  
@A00155:342:HHGFNDSXY:1:1543:3197:15734 1:N:0:GAACCTAG+TCCGCATA  
GGACTCTCCTCTGGCCTATGGTCATCTCAATGCCGAGAGGGATGTGGAGGGCGAGAGAGAGCGACTTC  
TCTCGGGCCCACAGCCTTACAGCTGTGGAGCACGGTATCCTCTGCCGAAACAGAGGTTGGACAAGACC  
+  
FFFFFFFFFFFFFFFFFFFFFFFFFFFFFFFFFFFF:F:F:FFF:FFFFFFFFFFFFFFFFFFFFFFFFFFFF  
FFFFFFFFFFFFFFFFFFFFFFFFFFFFFFFFFFFFFFFFFFFFFFFFFFFFFFFFFFFFFFFFFFFFFFFF  
@A00155:342:HHGFNDSXY:1:1543:13991:23156 1:N:0:GAACCTAG+TCCGCATA  
TTCTCTCGGGCCCACAGCCTTACAGCTGTGGAGCACGGTATCCTCTGCCGAAACAGAGGTTGGACAAG  
ACCGGGGGGTCTCCTAGTTCCAAAGGAGATGTACTCCGGGCTTGTTACGACCTACCG  
+  
FFFFFFFFFFFFFFFFFFFFFFFFFFFFFFFFFFFF:FFFFFFFFFFFFFFFFFFFFFFFFFFFFFFFFFFFF  
FFFFFFFFFFFFFFFFFFFFFFFFFFFFFFFFFFFFFFFFFFFFFFFFFFFFFFFFFFFFFFFFFFFFFFFF  
@A00155:342:HHGFNDSXY:1:1543:7844:29324 1:N:0:GAACCTAG+TCCGCATA  
CTGGCCTATGGTCATCTCAATGCCGAGAGGGATGTGGAGGGCGAGAGAGAGCGACTTCTCTCGGGCCC  
ACAGCCTTACAGCTGTGGAGCACGGTATCCTCTGCCGAAACAGAGGTTGGACAAGACCGGAGGGGTCT  
+  
FFFFFFFFFFFFFFFFFFFFFFFFFFFFFFFFFFFF:FFFFFFFFFFFFF:FFFFFFFFFFFFFFFFFFFFFFFFFFFF  
FFFFFFF:FFFFFFFFFFFFFFFFFFFFFFFFFFFFFFFFFFFF:FFFFFFFFFFFFFFFFFFFFFFFFFFFF  
@A00155:342:HHGFNDSXY:1:1544:26603:3975 1:N:0:GAACCTAG+TCCGCATA  
ACCTCTGTTTCGGCAGAGGATACCGTGCTCCACAGCTGTAAGGCTGTGGGCCCCGAGAGAAGTCGCTCT  
CTCTCGCCCTCCACATCCCTCTCGGCATTGAGATGACCATAGGCCAGAGGAGAGTCCTTAAGTGACA  
+  
FFFFFFFFFFFFFFFFFFFFFFFFFFFFFFFFFFFF:FFFFFFFFFFFFFFFFFFFFFFFFFFFFFFFFFFFF  
FFFFFFFFFFFFFFFFFFFFFFFFFFFFFFFFFFFFFFFFFFFFFFFFFFFFFFFFFFFFFFFFFFFFFFFF  
@A00155:342:HHGFNDSXY:1:1544:8034:16313 1:N:0:GAACCTAG+TCCGCATA  
GTATCCTCTGCCGAAACAGAGGTTGGACAAGACCGGAGGGGTCTCCTAGTTCCAAAGGAGATGTACTC

CGGGCTTGTTACGACCTACCGTGTAAGTCGTAGTCTAGTAGGCTACCTGACGAGTCCTTTTTTAGGAC  
+  
FFFFFFFFFFFFFFFFFFFFFFFFFFFFFFFFFFFFFFFFFFFFFFFFFFFFFFFFFFFFFFFFFFFFFFFFFFFF  
FFFFFFFF:FFFFFFFFFFFFFFFFFFFFFFFFFFFFFFFFFFFFFFFFFFFFFFFFFFFFFFFFFFFFFFFFFFFF  
@A00155:342:HHGFNDSXY:1:1544:28411:18505 1:N:0:GAACCTAG+TCCGCATA  
TTCTCTCGGGCCACAGCCTTACAGCTGTGGAGCACGGTATCCTCTGCCGAAACAGAGGTTGGACAAG  
ACCGGAGGGGTCTCCTAGTTCCAAAGGAGATGTACTCCGGGCTTGTTACGACCTACCGTGTAAGTCG  
+  
FFFFFFFFFFFFFFFFFFFFF:,FFFFFFFFFFFFFFFFFFFF,FFFFFFFFFFFFFFFFFFFFFFFFFFFFF  
FFFFF:FFFFFFFFFFFFFFFFFFFFFFFFFFFFFFFFFFFFFFFFFFFFFFFFFFFFFFFFFFFFFFFFFFFF,FFFF  
@A00155:342:HHGFNDSXY:1:1544:28420:18521 1:N:0:GAACCTAG+TCCGCATA  
TTCTCTCGGGCCACAGCCTTACAGCTGTGGAGCACGGTATCCTCTGCCGAAACAGAGGTTGGACAAG  
ACCGGAGGGGTCTCCTAGTTCCAAAGGAGATGTACTCCGGGCTTGTTACGACCTACCGTGTAAGTCG  
+  
FFFFFFFFFFFFFFFFFFFFF:FFFFFFFFF:FF:FFFFFFFFFFFFFFFFFFFFFFFFFFFFFFFFFFFFF  
FFFFF,FFFFFFFFFFFFFFFFFFFFF,FFFFFFFF,FFFFFFFFFFFFFFFFFFFFFFFFFFFFFFFFFFFF  
@A00155:342:HHGFNDSXY:1:1544:27760:20290 1:N:0:GAACCTAG+TCCGCATA  
TCCACTTAAGGACTCACCTCTGGCCTATGGTCATCTCAATGCCGAGAGGGATGTGGAGGGCGAGAGAG  
AGCGACTTCTCTCGGGCCACAGCCTTACAGCTGTGGAGCACGGTATCCTCTGCCGAAACAGAGGTTG  
+  
FFFFFFFFFFFFFFFFFFFFFFFFFFFFFFFFFFFFFFFFFFFFFFFFFFFFFFFFFFFFFFFFFFFFF:FFFF:F,FFFFFFFFFFFFFFFF  
FFFFFFFFFFFFFFFFFFFFFFFFFFFFF:FFFFFFFFFFFFFFFFF:FF:FFFFFFFFFFFFFFFFFFFFFFFFFFFFF  
@A00155:342:HHGFNDSXY:1:1544:13883:26882 1:N:0:GAACCTAG+TCCGCATA  
AGGGCGAGAGAGAGCGACTTCTCTCGGGCCACAGCCTTACAGCTGTGGAGCACGGTATCCTCTGCCG  
AAACAGAGGTTGGACAAGACCGGAGGGGTCTCCTAGTTCCAAAGGAGATGTACTCCGGGCTTGTTAC  
+  
FFFFFFFFFFFFFFFFFFFFFFFFFFFFFFFFFFFFFFFFFFFFFFFFFFFFFFFFFFFFFFFFFFFFF:FFFFFFFF  
FFFFFFFFFFFFFFFFFFFFFFFFFFFFF:FFFFFFFFFFFFFFFFF:FF:FFFFFFFFFFFFFFFFFFFFFFFFFFFFF  
@A00155:342:HHGFNDSXY:1:1544:27868:28933 1:N:0:GAACCTAG+TCCGCATA  
TCCACTTAAGGACTCACCTCTGGCCTATGGTCATCTCAATGCCGAGAGGGATGTGGAGGGCGAGAGAG  
AGCGACTTCTCTCGGGCCACAGCCTTACAGCTGTGGAGCACGGTATCCTCTGCCGAAACAGAGGTTG  
+  
FFFFFFFFF::FF:FFFF,FFFF::FFFF:FFFFFFFF:FFF:F:FFFF:FFFFFFFFFFFFFFFFFFFFF  
FFFF:FFFFFFFFFFFF:F,FFF:FF:,FFF:FFF:FFFFFFFF:FFF:FFFFFFFFF:FFFF,FFFF  
@A00155:342:HHGFNDSXY:1:1545:29496:8891 1:N:0:GAACCTAG+TCCGCATA  
CAATGCCGAGAGGGATGTAGAGGGCGAGAGAGAGCGACTTCTCTCGGGCCACAGCCTTACAGCTGTG  
GAGCACGGTATCCTCTGCCGAAACAGAGGTTGGACAAGACCGGAGGGGTCTCCTAGTTCCAAAGGAGA  
+  
FFFFFFFFFFFFFFFFFFFFFFFFFFFFFFFFFFFFFFFFFFFFFFFFFFFFFFFFFFFFFFFFFFFFF  
FFFFFFFFFFFFFFFFFFFFFFFFFFFFF:FFFFFFFFFFFFFFFFF:FF:FFFFFFFFFFFFFFFFFFFFFFFFFFFFF  
@A00155:342:HHGFNDSXY:1:1545:5520:10645 1:N:0:GAACCTAG+TCCGCATA  
GGACTCACCTCTGGCCTATGGTCATCTCAATGCCGAGAGGGATGTGGAGGGCGAGAGAGAGCGACTTC  
TCTCGGGCCACAGCCTTACAGCTGTGGAGCACGGTATCCTCTGCCGAAACAGAGGTTGGACAAGACC  
+  
FFF:FFFFFFFFFFFF,FFFF:FFFFFFFF,FFFFFF,FFFFFF:F:FFFFFFFFFFFFFFFFFFFFF  
FF:FFF:FFFFFFFFFFFFFFFFFFFFFFFFFFFFFFFFFFFFF:FFFFFFFFF:FFFF,F:FFF  
@A00155:342:HHGFNDSXY:1:1545:16450:12884 1:N:0:GAACCTAG+TCCGCATA  
CGACTTCTCTCGGGCCACAGCCTTACAGCTGTGGAGCACGGTATCCTCTGCCGAAACAGAGGTTGGA  
CAAGACCGGAGGGGTCTCCTGGTTCCAAAGGAGATGTACTCCGGGCTTGTTACGACCTACCGTGTA  
+  
FFFF,FFFFFFFFFFFFFFFFFFFFFFFFFFFFFFFFFFFFFFFFFFFFFFFFFFFFFFFFFFFFFFFFFFFF  
FFFFFF:FFFFFFFFFFFFFFFFFFFFF,FFFFFFFFFFFFF:FFFFFFFFFFFFF,FFF:FFFF  
@A00155:342:HHGFNDSXY:1:1546:9995:3051 1:N:0:GAACCTAG+TCCGCATA  
CTTCTCTCGGGCCACAGCCTTACAGCTGTGGAGCACGGTATCCTCTGCCGAAACAGAGGTTGGACAA

```
GACCGGAGGGGTCTCCTGGTTCCAAAGGAGATGTACTCCGGGCTTGTTACGACCTACCGTGTAAGTC  
+  
FFFFFFFFFFFFFFFFFFFFFFFFFFFFFFFFFFFFF:FFFFFFFFFFFFFFFFFFFFFFFFFFFFFFF, FFFFFFFFFF  
FFFFFFFFFFFFFFFFFFFFFFFFFFFFFFFFFFFFF:FFFFFFFFFF:FFFFFFF, FFFFFFFFFFFFFFFFFFFFFFFF  
@A00155:342:HHGFNDSXY:1:1546:32696:10207 1:N:0:GAACCTAG+TCCGCATA  
GAGCGACTTCTCTCGGGCCCACAGCCTTACAGCTGTGGAGCACGGTATCCTCTGCCGAAACAGAGGTT  
GGACAAGACCGGAGGGGTCTCCTAGTTCCAAAGGAGATGTACTCCGGACTTGTTACGACCTACCGTG  
+  
FFFFFFFFFFFFFFFFFFFFFFFFFFFFF, FFF:FFFFFFFFFFFFFFFFFFFFFFFFFFFFFFFFFFFFFFFFF  
FFFFFFFFFFFFFFFFFFFFFFFFFFFFFFFFFFFFF:FFFFFFFFFFFFFFFFFFFFFFFFFFFFF  
@A00155:342:HHGFNDSXY:1:1547:12789:14935 1:N:0:GAACCTAG+TCCGCATA  
TGCCGAGAGGGATGTGGAGGGCGAGAGAGAGCGACTTCTCTCGGGCCCCACAGCCTTACAGCTGTGGAG  
CACGGTATCCTCTGCCGAAACAGAGGTTGGACAAGACCGGAGGGGTCTCCTAGTTCCAAAGGAGATGT  
+  
FFFFFFFFFFFFFFFFFFFFFFFFFFFFFFFFFFFFFFFFFFFFFFFFFFFFFFFFFFFFFFFFFFFFFFFFFFFFF  
FFFFFFFFFFFFFFFFFFFFFFFFFFFFFFFFFFFFF:FFFFFFF:FFFFFFFFFFFFFFFFFFFFFFFFFFFFF, FFF  
@A00155:342:HHGFNDSXY:1:1547:20627:26850 1:N:0:GAACCTAG+TCCGCATA  
ACTTCTCTCGGGCCCACAGCCTTACAGCTGTGGAGCACGGTATCCTCTGCCGAAACAGAGGTTGGACA  
AGACCGGAGGGGTCTCCTAGTTCCAAAGGAGATGTACTCCGGGCTTGTTACGACCTACCGTGTAAGT  
+  
FFFFFFFFFFFFFFFFFFFFFFFFFFFFF:FFFFFFFFFFFFFFFFFFFFFFFFFFFFFFFFFFFFFFFFF:FFFFFFFFFFF  
FFFFFFFFFFFFFFFFFFFFFFFFFFFFFFFFFFFFF:FFF, FFF:FF  
@A00155:342:HHGFNDSXY:1:1548:22318:16470 1:N:0:GAACCTAG+TCCGCATA  
ACCTCTGTTTCGGCAGAGGATACC GTGCTCCACAGCTGTAAGGCTGTGGGCCCGAGAGAAGTCGCTCT  
CTCTCGCCCTCCACATCCCTCTCGGCATTGAGATGACCATAGGCCAGAGGAGAGTCTTAAGTGGACA  
+  
FFFFFFFFFFFFFFFFFFFFFFFFFFFFFFFFFFFFFFFFFFFFFFFFFFFFFFFFFFFFFFFFFFFFFFFFFFFFF:FFFF  
FFFFFFFFFFFFFFFFFFFFFFFFFFFFFFFFFFFFF:FFFFFFFFFFFFFFFFFFFFFFFFFFFFFFFFFFFFF  
@A00155:342:HHGFNDSXY:1:1548:20980:30060 1:N:0:GAACCTAG+TCCGCATA  
ATCCTCTGCCGAAACAGAGGTTGGACAAGACCGGAGGGGTCTCCTAGTTCCAAAGGAGATGTACTCCG  
GGCTTGTTACGACCTACCGTGTAAGTCGTAGTCTAGTAGGCTACCTGACGAGTCCTTTTTTAGGACGA  
+  
FFFFFFFFFFFFFFFFFFFFFFFFFFFFFFFFFFFFFFFFFFFFFFFFFFFFFFFFFFFFFFFFFFFFFFFFFFFFF  
FFFFFFFFFFFFFFFFFFFFFFFFFFFFFFFFFFFFF: :FFFFFFFFFFFFFFFFFFFFFFFFFFFFFFFFFFFFF  
FFFFFFFFFFFFFFFFFFFFFFFFFFFFFFFFFFFFF:FFFFFFFFFFFFFFFFFFFFFFFFFFFFFFFFFFFFF  
@A00155:342:HHGFNDSXY:1:1550:22191:2848 1:N:0:GAACCTAG+TCCGCATA  
AGAGAGAGCGACTTCTCTCGGGCCCACAGCCTTACAGCTGTGGAGCACGGTATCCTCTGCCGAAACAG  
AGGTTGGACAAGACCGGAGGGGTCTCCTAGTTCCAAAGGAGATGTACTCCGGGCTTGTTACGACCTA  
+  
FFFFFFFFFFFFFFFFFFFFFFFFFFFFFFFFFFFFFFFFFFFFFFFFFFFFFFFFFFFFFFFFFFFFFFFFFFFFF  
FFFFFFFFFFFFFFFFFFFFFFFFFFFFFFFFFFFFF:FFFFFFFFFFFFFFFFFFFFFFFFFFFFFFFFFFFFF  
@A00155:342:HHGFNDSXY:1:1550:13476:12680 1:N:0:GAACCTAG+TCCGCATA  
GGATGTGGAGGGCGAGAGAGAGCGACTTCTCTCGGGCCCACAGCCTTACAGCTGTGGAGCACGGTATC  
CTCTGCCGAAACAGAGGTTGGACAAGACCGGAGGGGTCTCCTAGTTCCAAAGGAGATGTAC
```

GTATCCTCTGCCGAAACAGAGGTTGGACAAGACCGGAGGGGTCTCCTAGTTCCAAAGGAGATGTACTC  
+  
:FFF::FF,,,FF,FFFF:,FFFF:FF,F:F,F,FF::F,:FF:, :FFFF,FF:F:F:FF:FF:FFFF  
FFFFFFFFFFFF:FFFFFFFFFFFFF:FFFF,FFFF:F,FFFFFFFFFFFFFFFFF,:F,F,FFFF:FF  
@A00155:342:HHGFNDSXY:1:1550:16387:21825 1:N:0:GAACCTAG+TCCGCATA  
CAATGCCGAGAGGGATGTGGAGGGCGAGAGAGAGCGACTTCTCTCGGGCCCACAGCCTTACAGCTGTG  
GAGCACGGTATCCTCTGCCGAAACAGAGGTTGGACAAGACCGGAGGGGTCTCCTAGTTCCAAAGGAGA  
+  
FFFFFFFFFFFFFFFF:FF:FFFFFFFFFFFFFFFFFFFFFFFFFFFFFFFFFFFFFFFFFFFFFFFFFFFFF  
FFFFFFFFFFFFFFFFFFFFFFFFFFFFFFFFFFFFFFFFFFFFFFFFFFFFFFFFFFFFFFFFFFFFFFFFFFFF  
@A00155:342:HHGFNDSXY:1:1550:11903:25300 1:N:0:GAACCTAG+TCCGCATA  
GGATGTGGAGGGCGAGAGAGAGCGACTTCTCTCGGGCCCACAGCCTTACAGCTGTGGAGCACGGTATC  
CTCTGCCGAAACAGAGGTTGGACAAGACCGGAGGGGTCTCCTAGTTCCAAAGGAGATGTACTCC  
+  
FFF,FFFFFFFFFFFFFFFFFFFFFFFFFFFFFFFFFFFFFFFFFFFFFFFFFFFFFFFFFFFFFFFFFFFFF  
:FFFFFFFFFFFF:FF,FFFFFFFF,FF:FFFFFFFFFFFFFFFFFFFFFFFF:FFFF:FFFFFFFFFFFF  
@A00155:342:HHGFNDSXY:1:1550:11767:26318 1:N:0:GAACCTAG+TCCGCATA  
GGATGTGGAGGGCGAGAGAGAGCGACTTCTCTCGGGCCCACAGCCTTACAGCTGTGGAGCACGGTATC  
CTCTGCCGAAACAGAGGTTGGACAAGACCGGAGGGGTCTCCTAGTTCCAAAGGAGATGTACTCC  
+  
FFFFFFFFFFFFFFFFFFFFFFFFFFFFFFFFFFFFFFFFFFFFFFFFFFFFFFFFFFFFFFFFFFFFFFFFFFFF  
FFFFFFFFFFFFFFFFFFFFFFFFFFFFFFFFFFFFFFFFFFFFFFFFFFFFFFFFFFFFFFFFFFFFFFFFFFFF  
@A00155:342:HHGFNDSXY:1:1551:23122:2707 1:N:0:GAACCTAG+TCCGCATA  
AGGGATGTGGAGGGCGAGAGAGAGCGACTTCTCTCGGGCCCACAGCCTTACAGCTGTGGAGCACGGTA  
TCCTCTGCCGAAACAGAGGTTGGACAAGACCGGAGGGGTCTCCTAGTTCCAAAGGAGATGTACTCCGG  
+  
FFFFFFFFFFFFFFFFFFFFFFFFFFFFFFFFFFFFFFFFFFFFFFFFFFFFFFFFFFFFFFFFFFFFFFFFFFFF  
FFFFFFFFFFFFFFFFFFFFFFFFFFFFFFFFFFFFFFFFFFFFFFFFFFFFFFFFFFFFFFFFFFFFFFFFFFFF  
@A00155:342:HHGFNDSXY:1:1551:20057:4163 1:N:0:GAACCTAG+TCCGCATA  
TCGGCAGAGGATACCGTGCTCCACAGCTGTAAGGCTGTGGGCCCCGAGAGAAGTCGCTCTCTCTCGCCC  
TTCACATCCCTCTCGGCATTGAGATGACCATAGGCCAGAGGTGAGTCCTTAAGTGGAC  
+  
FFFFFFFFFFFFFFFFFFFFFFFFFFFFFFFFFFFFFFFFFFFFFFFFFFFFFFFFFFFFFFFFFFFFFFFFFFFF  
FFFFFFFFFFFFFFFFFFFFFFFFFFFFFFFFFFFFFFFFFFFFFFFFFFFFFFFFFFFFFFFFFFFFFFFFFFFF  
@A00155:342:HHGFNDSXY:1:1551:31485:20290 1:N:0:GAACCTAG+TCCGCATA  
GGGCGAGAGAGAGCGACTTCTCTCGGGCCCACAGCCTTACAGCTGTGGAGCACGGTATCCTCTGCCGA  
AACAGAGGTTGGACAAGACCGGAGGGGTCTCCTAGTTCCAAAGGAGATGTACTCCGGGCTTGTTAC  
+  
FFFFFFFFFFFFFFFFFFFFFFFFFFFFFFFFFFFFFFFFFFFFFFFFFFFFFFFFFFFFFFFFFFFFFFFFFFFF  
FFFFFFFFFFFFFFFFFFFFFFFFFFFFFFFFFFFFFFFFFFFFFFFFFFFFFFFFFFFFFFFFFFFFFFFFFFFF  
@A00155:342:HHGFNDSXY:1:1552:16260:3881 1:N:0:GAACCTAG+TCCGCATA  
GAGCGACTTCTCTCGGGCCCACAGCCTTACAGCTGTGGAGCACGGTATCCTCTGCCGAAACAGAGGTT  
GGACAAGACCGGAGGGGTCTCCTAGTTCCAAAGGAGATGTACTCCGGGCTTGTTACGACCTACCGTG  
+  
F:FFF,:FFFFFFFFFFFFFFFFFFFFFFFFFFFFFFFFFFFFFFFFFFFFFFFFFFFFFFFFFFFFFFFFFFFF  
FFFFFFFFFFFFFFFFFFFFFFFFFFFFFFFFFFFFFFFFFFFFFFFFFFFFFFFFFFFFFFFFFFFFFFFFFFFF  
@A00155:342:HHGFNDSXY:1:1552:4824:6120 1:N:0:GAACCTAG+TCCGCATA  
CTCCTCTGGCCTATGGTCATCTCAATGCCGAGAGGGATGTGGAGGGCGAGAGAGAGCGACTTCTCTCG  
GGCCCACAGCCTTACAGCTGTGGAGCACGGTATCCTCTGCCGAAACAGAGGTTGGACAAGACCGGAGG  
+  
FFFFFFFFFFFFFFFFFFFFFFFFFFFFFFFFFFFFFFFFFFFFFFFFFFFFFFFFFFFFFFFFFFFFFFFFFFFF  
FFFFFFFFFFFF:FFFFFFFFF,FFFFFF: :FFFFFFFFFFFFFFFFFFFFFFFFFFFFFFFFFFFFFFFFFFFF  
@A00155:342:HHGFNDSXY:1:1552:22688:10723 1:N:0:GAACCTAG+TCCGCATA  
CACAGCTGATCTAAGGCGGTGTGGCGGGGCATGGGTTTGAACCCCATGACGGTCGGAGTCTAGTAGG

CTCCCTGATGAGTCCGTTCCAAGGACGAAACCGTCGTTACTCTTCGAGTTGTGTAAGTTTCGTCCTAA  
+  
FFFFFFFFFFFFFFFFFFFFFFFFFFFFFFFFFFFFFFFFFFFFFFFFFFFFFFFFFFFFFFFFFFFFFFFF  
FFFFFFFFFFFFFFFFFFFFFFFFFFFFFFFFFFFFFFFFFFFFFFFFFFFFFFFFFFFFFFFFFFFFFFFF  
@A00155:342:HHGFNDSXY:1:1552:27055:13338 1:N:0:GAACCTAG+TCCGCATA  
CTCCTCTGGCCTATGGTCATCTCAATGCCGAGAGGGATGTGGAGGGCGAGAGAGAGCGACTTCTCTCG  
GGCCACAGCCTTACAGCTGTGGAGCACGGTATCCTCTGCCGAAACAGAGGTTGGACAAGACCGGAGG  
+  
FFFFFFFFFFFFFFFFFFFFFFFFFFFFFFFFFFFFFFFFFFFFFFFFFFFFFFFFFFFFFFFFFFFFFFFF  
F:F:FFFFFFFF:FFFFFFFF:FFFFFFFF:FFFFFFFF:FFFFFFFF:FFFFFFFF:FFFFFFFF:FF  
@A00155:342:HHGFNDSXY:1:1552:19180:20932 1:N:0:GAACCTAG+TCCGCATA  
CTTCTCTCGGGCCACAGCCTTACAGCTGTGGAGCACGGTATCCTCTGCCGAAACAGAGGTTGGACAA  
GACCGGAGGGGTCTCCTAGTTCCAAAGGAGATGTACTCCGGGCTTGTTACGACCTACCGTGTAAGTC  
+  
FFFFFF:FFF,F,:FFFFFFFFFFFF,FFF:FFFF,,FFFF,,FFFFFFFFFFFFFFFFFFFFFFFF  
FFF:FFF:F,FFF:FF:FFF:FFFFFFFF:F,FFFFFF,F:FFF:FFFF,F::FFFFFFFF:FFF:F:F  
@A00155:342:HHGFNDSXY:1:1552:32090:23249 1:N:0:GAACCTAG+TCCGCATA  
GAGGGCGAGAGAGAGCGACTTCTCTCGGGCCACAGCCTTACAGCTGTGGAGCACGGTATCCTCTGCC  
GAAACAGAGGTTGGACAAGACCGGAGGGGTCTCCTAGTTCCAAAGGAGATGTACTCCGGGCTTGTTCA  
+  
FFFFFFFFFFFFFFFFFFFFFFFFFFFFFFFFFFFFFFFFFFFFFFFFFFFFFFFFFFFFFFFFFFFFFFFF  
FFFFFFFFFFFFFFFFFFFFFFFFFFFFFFFFFFFFFFFFFFFFFFFFFFFFFFFFFFFFFFFFFFFFFFFF  
@A00155:342:HHGFNDSXY:1:1553:13810:9314 1:N:0:GAACCTAG+TCCGCATA  
ACTTCTCTCGGGCCACAGCCTTACAGCTGTGGAGCACGGTATCCTCTGCCGAAACAGAGGTTGGACA  
AGACCGGAGGGGTCTCCTAGTTCCAAAGGAGATGTACTCCGGGCTTGTTACGACCTAC  
+  
FFFFFFFFFFFFFFFFFFFFFFFFFFFFFFFFFFFFFFFFFFFFFFFFFFFFFFFFFFFFFFFFFFFFFFFF  
FFFFFFFFFFFFFFFFFFFFFFFFFFFFFFFFFFFFFFFFFFFFFFFFFFFFFFFFFFFFFFFFFFFFFFFF  
@A00155:342:HHGFNDSXY:1:1553:25807:14904 1:N:0:GAACCTAG+TCCGCATA  
GAGCGACTTCTCTCGGGCCACAGCCTTACAGCTGTGGAGCACGGTATCCTCTGCCGAAACAGAGGTT  
GGACAAGACCGGTGGGGTCTCCTAGTTCCAAAGGAGATGTACTCCGGGCTTGTTACGACCTACCGTG  
+  
FFFFFFFFFFFFFFFFFFFFFFFFFFFFFFFFFFFFFFFFFFFFFFFFFFFFFFFFFFFFFFFFFFFFFFFF:F  
FFFFFFFFFFFFFFFFFFFFFFFFFFFFFFFFFFFFFFFFFFFFFFFFFFFFFFFFFFFFFFFFFFFFFFFF  
@A00155:342:HHGFNDSXY:1:1553:23113:19163 1:N:0:GAACCTAG+TCCGCATA  
ACCTCTGTTTCGGCAGAGGATACCGTGCTCCACAGCTGTAAGGCTGTGGGCCCGAGAGAAGTCGCTCT  
CTCTCGCCCTCTACATCCCTCTCGGCATTGAGATGACCATAGGCCAGAGGTGAGTCCTTAAGTGGACA  
+  
FFFFFFFFFFFFFFFFFFFFFFFFFFFFFFFFFFFFFFFFFFFFFFFFFFFFFFFFFFFFFFFFFFFFFFFF  
FFFFFFFFFFFFFFFFFFFFFFFFFFFFFFFFFFFFFFFFFFFFFFFFFFFFFFFFFFFFFFFFFFFFFFFF  
@A00155:342:HHGFNDSXY:1:1553:7554:23563 1:N:0:GAACCTAG+TCCGCATA  
TGTGGAGGGCGAGAGAGAGCGACTTCTCTCGGGCCACAGCCTTACAGCTGTGGAGCACGGTATCCTC  
TGCCGAAACAGAGGTTGGACAAGACCGGAGGGGTCTCCTAGTTCCAAAGGAGATGTACTCCGGGCTTG  
+  
FFFFFFFFFFFFFFFFFFFFFFFFFFFFFFFFFFFFFFFFFFFFFFFFFFFFFFFFFFFFFFFFFFFFFFFF  
FFFFFFFFFFFFFFFFFFFFFFFFFFFFFFFFFFFFFFFFFFFFFFFFFFFFFFFFFFFFFFFFFFFFFFFF  
@A00155:342:HHGFNDSXY:1:1553:24334:28604 1:N:0:GAACCTAG+TCCGCATA  
CTTCTCTCGGGCCACAGCCTTACAGCTGTGGAGCACGGTATCCTCTGCCGAAACAGAGGTTGGACAA  
GACCGGAGGGGTCTACTAGTTCCAAAGGAGATGTACTCCGGGCTTGTTACGACCTACCGTGTAAGTC  
+  
FFFFFFFFFFFFFFFFFFFFFFFFFFFFFFFFFFFFFFFFFFFFFFFFFFFFFFFFFFFFFFFF:F,FFFFFF:F  
:FFFFFFFFFFFF,FFF:FFFFFFFFFFFFFFFFFFFFFFFFFFFFFFFFFFFFFFFFFFFFFFFF  
@A00155:342:HHGFNDSXY:1:1553:9073:34585 1:N:0:GAACCTAG+TCCGCATA  
ATCTCAATGCCGAGAGGGATGTGGAGGGCGAGAGAGAGCGACTTCTCTCGGGCCACAGCCTTACAGC

TGTGGAGCACGGTATCCTCTGCCGAAACAGAGGTTGGACAAGACCGGAGGGGTCTCCTAGTTCCAAAG  
+  
FFFFFFFFFFFFFFFFFFFFFFFFFFFFFFFFFFFFFFFFFFFFFFFFFFFFFFFFFFFFFFFFFFFFFFFF  
FFFFFFFFFFFFFFFFFFFFFFFFFFFFFFFFFFFFFFFFFFFFFFFFFFFFFFFFFFFFFFFFFFFFFFFF  
@A00155:342:HHGFNDSXY:1:1554:29008:7200 1:N:0:GAACCTAG+TCCGCATA  
ACATCCCTCTCGGCATTGAGATGACCATAGGCCAGAGGTGAGTCCTTAAGTGGACACAGCTGATCTAA  
GGCGGTGTGGCGGGCATGGGTTTGAACCCCATGACGGTCGGAGTCTAGTAGGCTCCCTGATGAGTC  
+  
FF:FFFFFFFFFFFFFFFFFFFFFFFFFFFFFFFFFFFFFFFFFFFFFFFFFFFFFFFFFFFFFFFFFFFF  
FFFFFFFFFFFFFFFFFFFFFFFFFFFFFFFFFFFFFFFFFFFFFFFFFFFFFFFFFFFFFFFFFFFFFFFF  
@A00155:342:HHGFNDSXY:1:1554:17644:9314 1:N:0:GAACCTAG+TCCGCATA  
GAGCGACTTCTCTCGGGCCCACAGCCTTACAGCTGTGGAGCACGGTATCCTCTGCCGAAACAGAGGTT  
GGACAAGACCGGAGGGGTCTCCTAGTTCCAAAGGAGATGTACTCCGGGCTTGTTACGACCTACCGTG  
+  
FFFFFFFFFFFFFFFFFFFFFFFFFFFFFFFFFFFFFFFFFFFFFFFFFFFFFFFFFFFFFFFFFFFFFFFF  
FFFFFFFFFFFFFFFFFFFFFFFFFFFFFFFFFFFFFFFFFFFFFFFFFFFFFFFFFFFFFFFFFFFFFFFF  
@A00155:342:HHGFNDSXY:1:1554:6008:13745 1:N:0:GAACCTAG+TCCGCATA  
AGAGAGAGCGACTTCTCTCGGGCCCACAGCCTTACAGCTGTGGAGCACGGTATCCTCTGCCGAAACAG  
AGGTTGGACAAGACCGGAGGGGTCTCCTAGTTCCAAAGGAGATGTACTCCGGGCTTGTTT  
+  
FFFFFFFFFFFFFFFFFFFFFFFFFFFFFFFFFFFFFFFFFFFFFFFFFFFFFFFFFFFFFFFFFFFFFFFF  
FFFFFFFFFFFFFFFFFFFFFFFFFFFFFFFFFFFFFFFFFFFFFFFFFFFFFFFFFFFFFFFFFFFFFFFF  
@A00155:342:HHGFNDSXY:1:1554:13666:14606 1:N:0:GAACCTAG+TCCGCATA  
TTCTCTCGGGCCCACAGCCTTACAGCTGTGGAGCACGGTATCCTCTGCCGAAACAGAGGTTGGACAAG  
ACCGGAGGGGTCTCCTAGTTCCAAAGGAGATGTACTCCGGGCTTGTTACGACCTACCGTGTAAGTCG  
+  
FFFFFFFFFFFFFFFFFFFFFFFFFFFFFFFFFFFFFFFFFFFFFFFFFFFFFFFFFFFFFFFFFFFFFFFF  
FFFFFFFFFFFFFFFFFFFFFFFFFFFFFFFFFFFFFFFFFFFFFFFFFFFFFFFFFFFFFFFFFFFFFFFF  
@A00155:342:HHGFNDSXY:1:1554:17219:24079 1:N:0:GAACCTAG+TCCGCATA  
ACTTCTCTCGGGCCCACAGCCTTACAGCTGTGGAGCACGGTATCCTCTGCCGAAACAGAGGTTGGAGA  
AGACCGGAGGGGTCTCCTAGTTCCAAAGGAGATGTACTCCGGGCTTGTTACGACCTACCGTGTAAGT  
+  
FFFFFFFFFFFFFFFFFFFFFFFFFFFFFFFFFFFFFFFFFFFFFFFFFFFFFFFFFFFFFFFFFFFFFFFF  
FF:FFFFFFFFFFFF,FFFF:FFFF:FFFFFFFFFFFFFFFFFFFFFFFF,FFFFFFFFFF:FFFFF:FF  
@A00155:342:HHGFNDSXY:1:1554:17173:24659 1:N:0:GAACCTAG+TCCGCATA  
ACTTCTCTCGGGCCCACAGCCTTACAGCTGTGGAGCACGGTATCCTCTGCCGAAACAGAGGTTGGAGA  
AGACCGGAGGGGTCTCCTAGTTCCAAAGGAGATGTACTCCGGGCTTGTTACGACCTACCGTGTAAGT  
+  
FF:FFFFFFFFFFFFFFFFFFFFFFFFFFFFFFFFFFFFFFFFFFFFFFFFFFFFFFFFFFFFFFFFFFFF  
FFFFFFFFFFFFFFFFFFFFFFFFFFFFFFFFFFFFFFFFFFFFFFFFFFFFFFFFFFFFFFFFFFFFFFFF  
@A00155:342:HHGFNDSXY:1:1554:12093:34648 1:N:0:GAACCTAG+TCCGCATA  
GTGGAGGGCGAGAGAGAGCGACTTCTCTCGGGCCCACAGCCTTACAGCTGTGGAGCACGGTATCCTCT  
GCCGAAACAGAGGTTGGACAAGACCGGAGGGGTCTCCTAGTTCCAAAGGAGATGTACTCCGGGCTTGTT  
+  
FFFFFFFFFFFFFFFFFFFFFFFFFFFFFFFFFFFFFFFFFFFFFFFFFFFFFFFFFFFFFFFFFFFFFFFF  
FFFFFFFFFFFFFFFFFFFFFFFFFFFFFFFFFFFFFFFFFFFFFFFFFFFFFFFFFFFFFFFFFFFFFFFF  
@A00155:342:HHGFNDSXY:1:1554:11677:35305 1:N:0:GAACCTAG+TCCGCATA  
GTGGAGGGCGAGAGAGAGCGACTTCTCTCGGGCCCACAGCCTTACAGCTGTGGAGCACGGTATCCTCT  
GCCGAAACAGAGGTTGGACAAGACCGGAGGGGTCTCCTAGTTCCAAAGGAGATGTACTCCGGGCTTGTT  
+  
FFFFFFFFFFFFFFFFFFFFFFFFFFFFFFFFFFFFFFFFFFFFFFFFFFFFFFFFFFFFFFFFFFFFFFFF  
:FFFFFFFFFFFF:FFFFFF:FFFFFFFFFFFFFFFFFFFFFFFFFFFFFFFFFFFFFFFFFFFFFFFF  
@A00155:342:HHGFNDSXY:1:1554:13738:35336 1:N:0:GAACCTAG+TCCGCATA  
GTGGAGGGCGAGAGAGAGCGACTTCTCTCGGGCCCACAGCCTTACAGCTGTGGAGCACGGTATCCTCT



GCCGAAACAGAGGTTGGACAAGACCGGAGGGGTCTCCTAGTTCCAAAGGAGATGTACTCCGGGCTTGT  
+  
FFFFFFFFFFFFFFFFFFFFFFFFFFFFFFFFFFFFFFFFFFFFFFFFFFFFFFFFFFFFFFFFFFFFFFFF  
FFFFFFFFFFFFFFFFFFFFFFFFFFFFFFFFFFFFFFFFFFFFFFFFFFFFFFFFFFFFFFFFFFFFFFFF  
@A00155:342:HHGFNDSXY:1:1555:26476:4570 1:N:0:GAACCTAG+TCCGCATA  
GTCATCTCAATGCCGAGAGGGATGTGGAGGGCGAGAGAGAGCGACTTCTCTCGGGCCCACAGCCTTAC  
AGCTGTGGAGCACGGTATCCTCTGCCGAAACAGAGGTTGGACAAGACCGGAGGGGTCTCCTAGTTCCA  
+  
FFFFFFFFFFFFFFFFFFFFFFFFFFFFFFFFFFFFFFFFFFFFFFFFFFFFFFFFFFFFFFFFFFFFFFFF  
FFFFF:FFFFFFFFFFFFFFFFFFFFFFFFF:F:FFFFFFFFFFFFFFFFFFFFFFFFFFFFFFFFFFFF  
@A00155:342:HHGFNDSXY:1:1555:15004:8625 1:N:0:GAACCTAG+TCCGCATA  
CAATGCCGAGAGGGATGTGGAGGGCGAGAGAGAGCGACTTCTCTCGGGCCCACAGCCTTACAGCTGTG  
GAGCACGGTATCCTCTGCCGAAACAGAGGTTGGACAAGACCGGAGGGGTCTCCTGGTTCCAAAGGAGA  
+  
FFFFFFFFFFFFFFFFFFFF:FFFFFFFFFFFFFFFFFFFFFFFFFFFFFFFFFFFFFFFFFFFFFFFFFFFF  
FFFFFFFFFFFFFFFFFFFFFFFFFFFFFFFFFFFFFFFFFFFF:FFFF:FFFFFFFFFFFFFFFFFFFF:FFFF  
@A00155:342:HHGFNDSXY:1:1555:2772:34914 1:N:0:GAACCTAG+TCCGCATA  
TGTGGAGGGCGAGAGAGAGCGACTTCTCTCGGGCCCACAGCCTTACAGCTGTGGAGCACGGTATCCTC  
TGCCGAAACAGAGGTTGGACAAGACCGGAGGGGTCTCCTAGTTCCAAAGGAGATGTACTCCGGG  
+  
FFFFFFFFFFFFFFFFFFFF:FFFFFFFFFFFF:,F:FFFFFFFFFFFFFFFF:FFFFFFFFFFFF:FFFFF  
FF:FFFFFFFFFFFFFFFFFFFF:FFFFFFFF:F,FFFFFFFFFFFFFFFFFFFFFFFFFFFFFFFFFFFF  
@A00155:342:HHGFNDSXY:1:1556:7563:12336 1:N:0:GAACCTAG+TCCGCATA  
CTCCTCTGGCCTATGGTCATCTCAATGCCGAGAGGGATGTGGAGGGCGAGAGAGAGCGACTTCTCTCG  
GGCCCACAGCCTTACAGCTGTGGAGCACGGTATCCTCTGCCGAAACAGAGGTTGGACAAGACCGGAGG  
+  
FFFFFFFFFFFFFFFFFFFFFFFFFFFFFFFFFFFF:FFFFFFFFFFFFFFFFFFFFFFFFFFFFFFFFFFFF  
FFFFFFFFFFFFFFFFFFFFFFFFFFFFFFFFFFFFFFFFFFFFFFFFFFFFFFFFFFFFFFFFFFFFFFFF  
@A00155:342:HHGFNDSXY:1:1556:7500:18270 1:N:0:GAACCTAG+TCCGCATA  
GTCATCTCAATGCCGAGAGGGATGTGGAGGGCGAGAGAGAGCGACTTCTCTCGGGCCCACAGCCTTAC  
AGCTGTGGAGCACGGTATCCTCTGCCGAAACAGAGGTTGGACAAGACCGGAGGGGTCTCCTAGTTCCA  
+  
FFFFFFFFFFFFF,FFFFFFFFF:FFFFFFFFFFFFFFFFFFFFFFFFFFFFFFFFFFFF:FFFFFFFFF  
FFFFFFFFFFFFFFFFFFFFFFFFFFFFFFFFFFFF,FFFFFFFFFFFFFFFFFFFFFFFFFFFFFFFFFFFF  
@A00155:342:HHGFNDSXY:1:1556:9326:25911 1:N:0:GAACCTAG+TCCGCATA  
AAGGACTCTCCTCTGGCCTATGGTCATCTCAATGCCGAGAGGGATGTGGAGGGCGAGAGAGAGCGACT  
TCTCTCGGGCCCACAGCCTTACAGCTGTGGAGCACGGTATCCTCTGCCGAAACAGAGGTTGGACAAGA  
+  
FFFFFFFFFFFFFFFFFFFFFFFFFFFFFFFFFFFF,FFFFFFFF:F:FFFFFFFFFFFFFFFFFFFFFFFF  
FFFFFFFFFFFFFFFFFFFFF,FFFFFFFFFFFFFFFFFFFFFFFFFFFFFFFFFFFFFFFFFFFFFFFFFFFF  
@A00155:342:HHGFNDSXY:1:1557:27914:3396 1:N:0:GAACCTAG+TCCGCATA  
TGGTCATCTCAATGCCGAGAGGGATGTAGAGGGCGAGAGAGAGCGACTTCTCTCGGGCCCACAGCCTT  
ACAGCTGTGGAGCACGGTATCCTCTGCCGAAACAGAGGTTGGACAAGACCGGAGGGGTCTCCTAGTTC  
+  
FFFFFFFFFFFFFFFFFFFFFFFFFFFFFFFFFFFFFFFFFFFFFFFFFFFFFFFFFFFFFFFFFFFFFFFF  
FFFFFFFFFFFFFFFFFFFFFFFFFFFFFFFFFFFFFFFFFFFFFFFFFFFFFFFFFFFFFFFFFFFFFFFF  
@A00155:342:HHGFNDSXY:1:1557:15881:32503 1:N:0:GAACCTAG+TCCGCATA  
GGATGTGGAGGGCGAGAGAGAGCGACTTCTCTCGGGCCCACAGCCTTACAGCTGTGGAGCACGGTATC  
CTCTGCCGAAACAGAGGTTGGACAAGACCGGAGGGGTCTCCTAGTTCCAAAGGAGATGTACT  
+  
FFFFFFFFFFFFFFFFFFFFFFFFFFFFFFFFFFFFFFFFFFFFFFFFFFFFFFFFFFFFFFFFFFFFFFFF:FF  
FFFFFFFFFFFFFFFFFFFFFFFFFFFFFFFFFFFFFFFFFFFFFFFFFFFFFFFFFFFFFFFFFFFFFFFF  
@A00155:342:HHGFNDSXY:1:1558:10077:17722 1:N:0:GAACCTAG+TCCGCATA  
GTATCCTCTGCCGAAACAGAGGTTGGACAAGACCGGAGGGGTCTCCTAGTTCCAAAGGAGATGTACTC

CGGGCTTGTTACGACCTACCGTGTAAGTCGTAGTCTAGTAGGCTACCTGACGAGTCCTTTTTAGGAC  
+  
FFFFFF:FFFFFFFFFFFFFFFF:FFFFFFFFFFFFFFFFFFFFFFFFFFFFFFFFFFFFFFFF  
FFFFFFFFFFFFFFFFFFFFFFFFFFFFFFFF:FFFFFFFF:FFFFFFFFFFFFFFFFFFFFFFFF  
@A00155:342:HHGFNDSXY:1:1558:13006:28401 1:N:0:GAACCTAG+TCCGCATA  
GGATGTGGAGGGCGAGAGAGAGCGACTTCTCTCGGGCCACAGCCTTACAGCTGTGGAGCACGGTATC  
CTCTGCCGAAACAGAGGTTGGACAAGACCGGAGGGGTCTCCTAGTTCAAAGGAGATGTACTCC  
+  
FFFFFFFFFFFFFFFFFFFFFFFFFFFFFFFFFFFFFFFFFFFFFFFFFFFFFFFFFFFFFFFF  
FFFFFF:FFFFFFFFFFFFFFFF:F,FFFFFFFFFFFFFFFFFFFFFFFFFFFFFFFF  
@A00155:342:HHGFNDSXY:1:1558:4444:31516 1:N:0:GAACCTAG+TCCGCATA  
TGGAGGGCGAGAGAGAGCGACTTCTCTCGGGCCACAGCCTTACAGCTGTGGAGCACGGTATCCTCTG  
CCGAAACAGAGGTTGGACAAGACCGGAGGGGTCTCCTAGTTCAAAGGAGATGTACTCCGGGCTTGTT  
+  
FFFFFFFFFFFFFFFFFFFFFFFF:FFFFFFFFFFFFFFFFFFFFFFFFFFFFFFFFFFFFFFFF  
FFFFFFFFFFFFFFFFFFFFFFFFFFFFFFFF:FFFFFFFFFFFFFFFFFFFFFFFF  
@A00155:342:HHGFNDSXY:1:1558:23285:36996 1:N:0:GAACCTAG+TCCGCATA  
AGAGAGAGCGACTTCTCTCGGGCCACAGCCTTACAGCTGTGGAGCACGGTATCCTCTGCCGAAACAG  
AGGTTGGACAAGACCGGAGGGGTCTCCTAGTTCAAAGGAGATGTACTCCGGGCTTGTTACGAC  
+  
FFFFFFFFFFFFFFFFFFFFFFFFFFFFFFFFFFFFFFFFFFFFFFFFFFFFFFFFFFFFFFFF  
FFFFFFFFF:FFFFFFFFFFFFFFFFFFFFFFFFFFFFFFFFFFFFFFFFFFFFFFFF  
@A00155:342:HHGFNDSXY:1:1559:20220:3662 1:N:0:GAACCTAG+TCCGCATA  
TGTGTCCACTTAAGGACTCACCTCTGGCCTATGGTCATCTCAATGCCGAGAGGGATGTGAAGGGCGAG  
AGAGAGCGACTTCTCTCGGGCCACAGCCTTACAGCTGTGGAGCACGGTATCCTCTGCCGAAACAGAG  
+  
FFFFFFFFFFFFFFFFFFFFFFFFFFFFFFFFFFFFFFFFFFFFFFFFFFFFFFFFFFFFFFFF:FFFFF  
FFFFFFFFFFFFFFFFFFFFFFFFFFFFFFFFFFFFFFFFFFFFFFFFFFFFFFFFFFFFFFFF  
@A00155:342:HHGFNDSXY:1:1559:30246:6120 1:N:0:GAACCTAG+TCCGCATA  
GTCTTGTCCAACCTCTGTTTCGGCAGAGGATACCGTGCTCCACAGCTGTAAGGCTGTGGGCCCGAGAG  
AAGTCGCTCTCTCTCGCCCTCCACATCCCTCTCGGCATTGAGATGACCATAGGCCAGAGGTG  
+  
FFFFFFFFFFFFFFFFFFFFFFFFFFFFFFFFFFFFFFFFFFFFFFFFFFFFFFFFFFFFFFFF  
FFFFFFFFFFFFFFFFFFFFFFFFFFFFFFFFFFFFFFFFFFFFFFFFFFFFFFFFFFFFFFFF  
@A00155:342:HHGFNDSXY:1:1559:22236:12070 1:N:0:GAACCTAG+TCCGCATA  
GATGTGGAGGGCGAGAGAGAGCGACTTCTCTCGGGCCACAGCCTTACAGCTGTGGAGCACGGTATCC  
TCTGCCGAAACAGAGGTTGGACAAGACCGGAGGGGTCTCCTAGTTCAAAGGAGATGTACTCCGGGCT  
+  
FFFFFFFFFFFFFFFFFFFFFFFFFFFFFFFFFFFFFFFFFFFFFFFFFFFFFFFFFFFFFFFF  
FFFFFFFFFFFFFFFFFFFFFFFFFFFFFFFFFFFFFFFFFFFFFFFFFFFFFFFFFFFFFFFF  
@A00155:342:HHGFNDSXY:1:1559:24894:17769 1:N:0:GAACCTAG+TCCGCATA  
ACCCCTCCGGTCTTGTCCAACCTCTGTTTCGGCAGAGGATACCGTGCTCCACAGCTGTAAGGCTGTGG  
GCCCGAGAGAAGTCGCTCTCTCTCGCCCTCTACATCCCTCTCGGCATTGAGATGACCATAGGCCAGAG  
+  
FFFFFFFFFFFFF:,FFFFFFFFFFFFFFFFFFFFFFFFFFFFFFFFFFFFFFFF:FFFFFFF  
FFFFFFFFFFFFFFFFFFFFFFFFFFFFFFFFFFFFFFFFFFFFFFFFFFFFFFFFFFFFFFFF:F:FFF:FFF  
@A00155:342:HHGFNDSXY:1:1559:23574:33520 1:N:0:GAACCTAG+TCCGCATA  
TGTCCACTTAAGGACTCACCTCTGGCCTATGGTCATCTCAATGCCGAGAGGGATGTGAAGGGCGAGAG  
AGAGCGACTTCTCTCGGGCCACAGCCTTACAGCTGTGGAGCACGGTATCCTCTGCCGAAACAGAGGT  
+  
FFFFFFFFFFFFFFFFFFFFFFFFFFFFFFFFFFFFFFFFFFFFFFFFFFFFFFFFFFFFFFFF  
:FFFFFFFFFFFFFFFFFFFFFFFFFFFFFFFFFFFFFFFFFFFFFFFFFFFFFFFFFFFFFFFF  
@A00155:342:HHGFNDSXY:1:1560:20274:6887 1:N:0:GAACCTAG+TCCGCATA  
GGGCGAGAGAGAGCGACTTCTCTCGGGCCACAGCCTTACAGCTGTGGAGCACGGTATCCTCTGCCGA

AACAGAGGTTGGACAAGACCGGAGGGGTCTCCTGGTTCCAAAGGAGATGTACTCCGGGCTTGTTACG  
+  
::FFFFFF:FFFFFFF,FFFFFF:FFFFFFF,FFFFFFFFFFFFFFFF:FFFFFF:FFF  
FFF::FFFFFFFFFFFFFFFFFFFFFFFFF,FFFFFFFFF,FFFFFFFFFFFFFFFF:FFFFFF:  
@A00155:342:HHGFNDSXY:1:1561:10619:2065 1:N:0:GAACCTAG+TCCGCATA  
CTTCTCTCGGGCCACAGCCTTACAGCTGTGGAGCACGGTATCCTCTGCCGAAACAGAGGTTGGACAA  
GACCGGAGGGGTCTCCTGGTTCCAAAGGAGATGTACTCCGGGCTTGTTACGACCTACCGTGT  
+  
FFFFFFFFFFFFFFFFFFFFFFFFFFFFFFFFFFFFFFFFFFFFFFFFFFFFFFFFFFFFFFFFFFFF  
FFFFFFFFFFFFFFFFFFFFFFFFFFFFFFFFFFFFFFFFFFFFFFFFFFFFFFFFFFFFFFFFFFFF  
@A00155:342:HHGFNDSXY:1:1561:32461:18912 1:N:0:GAACCTAG+TCCGCATA  
TTAAGGACTCTCCTCTGGCCTATGGTCATCTCAATGCCGAGAGGGATGTGGAGGGCGAGAGAGCGA  
CTTCTCTCGGGCCACAGCCTTACAGCTGTGGAGCACGGTATCCTCTGCCGAAACAGAGGTTGGACAA  
+  
FFFFFFFFFFFFFFFFFFFFFFFFFFFFFFFFFFFFFFFFFFFFFFFFFFFFFFFFFFFFFFFFFFFF  
FFFFFFFFFFFFFFFFFFFFFFFFFFFFFFFFFFFFFFFFFFFFFFFFFFFFFFFFFFFFFFFFFFFF:FFFFFFF  
@A00155:342:HHGFNDSXY:1:1561:28357:24424 1:N:0:GAACCTAG+TCCGCATA  
CTCTGGCCTATGGTCATCTCAATGCCGAGAGGGATGTAGAGGGCGAGAGAGAGCGACTTCTCTCGGGC  
CCACAGCCTTACAGCTGTGGAGCACGGTATCCTCTGCCGAAACAGAGGTTGGACAAGACCGGAGGGGT  
+  
FFFFFFFFFFFFFF:FF:FFFFFFFFFFFFFFFF:F:FFFF,FF:FFFFFFFFFFFFFFFF:FFF  
FFFFFF::FFFFFFFFFFFFFFFFFFFFFFFFFFFF:FFFF:F:F:FFF:FFFF:FF:FFFFFFF  
@A00155:342:HHGFNDSXY:1:1561:14968:25034 1:N:0:GAACCTAG+TCCGCATA  
GGACTCACCTCTGGCCTATGGTCATCTCAATGCCGAGAGGGATGTGAAGGGCGAGAGAGAGCGACTTC  
TCTCGGGCCACAGCCTTACAGCTGTGGAGCACGGTATCCTCTGCCGAAACAGAGGTTGGAC  
+  
FFFFFFFFFFFFFFFFFFFFFFFFFFFFFFFFFFFFFFFFFFFFFFFFFFFFFFFFFFFFFFFFFFFF  
FFFFFFFFFFFFFFFFFFFFFFFFFFFFFFFFFFFFFFFFFFFFFFFFFFFFFFFFFFFFFFFFFFFF,FFFFFFF  
@A00155:342:HHGFNDSXY:1:1561:3640:25363 1:N:0:GAACCTAG+TCCGCATA  
TGTCCACTTAAGGACTCTCCTCTGGCCTATGGTCATCTCAATGCCGAGAGGGATGTGGAGGGCGAGAG  
AGAGCGACTTCTCTCGGGCCACAGCCTTACAGCTGTGGAGCACGGTATCCTCTGCCGAAACAGAGGT  
+  
FFFFFFFFFFFFFFFFFFFFFFFFFFFFFFFFFFFFFFFFFFFFFFFFFFFFFFFFFFFFFFFFFFFF  
FFFFF,FFFFFFFFFFFFFFFFFFFF:F,FFFFFFFFF:FFFFFFFFFFFFFFFFFFFFFFFF  
@A00155:342:HHGFNDSXY:1:1562:30770:2738 1:N:0:GAACCTAG+TCCGCATA  
AGAGAGAGCGACTTCTCTCGGGCCACAGCCTTACAGCTGTGGAGCACGGTATCCTCTGCCGAAACAG  
AGGTTGGACAAGACCGGAGGGGTCTCCTGGTTCCAAAGGAGATGTACTCCGGGCTTGTTAC  
+  
FFFFFFFFFFFF:FFFFFFFFFFFFFFFFFFFFFFFFFFFFFFFFFFFFFFFFFFFFFFFFFFFFFFFF  
FFFFFFFFFFFFFFFFFFFFFFFFFFFFFFFFFFFFFFFFFFFF:FFFFFFFFFFFFFFFFFFFF  
@A00155:342:HHGFNDSXY:1:1562:4869:7921 1:N:0:GAACCTAG+TCCGCATA  
GCTGTGTCCACTTAAGGACTCACCTCTGGCCTATGGTCATCTCAATGCCGAGAGGGATGTGAAGGGCG  
AGAGAGAGCGACTTCTCTCGGGCCACAGCCTTACAGCTGTGGAGCACGGTATCCTCTGCCGAAACAG  
+  
FFFFFFFFFFFFFFFFFFFFFFFFFFFFFFFFFFFF,FFFFFFFFFFFFFFFFFFFF:FFFFFFF:FFFF  
FFFFFFFFFFFFFFFFFFFFFFFFFFFFFFFFFFFFFFFFFFFFFFFFFFFFFFFFFFFFFFFFFFFF  
@A00155:342:HHGFNDSXY:1:1562:13422:26490 1:N:0:GAACCTAG+TCCGCATA  
CGAGAGGGATGTGGAGGGCGAGAGAGAGCGACTTCTCTCGGGCCACAGCCTTACAGCTGTGGAGCAC  
GGTATCCTCTGCCGAAACAGAGGTTGGACAAGACCGGAGGGGTCTCCTAGTTCCAAAGGAGATGTACT  
+  
,FFFF,F:FFF:F:F,F,F,FFFF,FFFF:F:FFFF:F:,,,F,FF:F:F,FFFF,:FFF,,FFFF  
FFFF:F:FFFFFFFFF,FFFFFF:F,F:FFFFFF,FFF:F,F:FFFF:FF:FFFFFF:FFF:FFF  
@A00155:342:HHGFNDSXY:1:1563:15826:7044 1:N:0:GAACCTAG+TCCGCATA  
AGCGACTTCTCTCGGGCCACAGCCTTACAGCTGTGGAGCACGGTATCCTCTGCCGAAACAGAGGTTG

GACAAGACCGGAGGGGTCTCCTAGTTCCAAAGGAGATGTACTCCGGGCTTGTTACGACCTACCGTGT  
+  
FFFFFFFFF:FFFFFFFFFFFFFFFF:FFFFFFFFFFFFFFFFFFFFFFFFFFFFFFFFFFFFFFFFFFFFFFFFF:FFFFFFFFFFFF  
FFFFFFFFFFFFFFFFFFFFFFFFFFFFFFFFFFFFFFFFFFFFFFFFFFFFFFFFFFFFFFFFFFFFFFFFF:FFFFFFFFF:F:FF  
@A00155:342:HHGFNDSXY:1:1563:9037:14826 1:N:0:GAACCTAG+TCCGCATA  
TCTCTCGGGCCACAGCCTTACAGCTGTGGAGCACGGTATCCTCTGCCGAAACAGAGGTTGGACAAGA  
CCGGAGGGGTCTCCTAGTTCCAAAGGAGATGTACTCCGGGCTTGTTACGACCTACCGTGTAAAGTCGT  
+  
FFFFFFFFFFFFFFFFFFFFFFFF:FFF::FFFFFFFFFFFFFFFFFFFFFFFFFFFFFFFFFFFFFFFFFFFFFFFFF  
FFFFFFFFFFFFFFFFFFFFFFFFFFFFFFFFFFFFFFFFFFFFFFFFFFFFFFFFFFFFFFFFFFFFFFFFF,FFFFFFFFFFFFFFFFFFFFFFFFF  
@A00155:342:HHGFNDSXY:1:1563:15953:15843 1:N:0:GAACCTAG+TCCGCATA  
GAGCGACTTCTCTCGGGCCACAGCCTTACAGCTGTGGAGCACGGTATCCTCTGCCGAAACAGAGGTT  
GGACAAGACCGGAGGGGTCTCCTAGTTCCAAAGGAGATGTACTCCGGGCTTGTTACGACCTACCGTG  
+  
FFFFFFFFFFFFFFFFFFFFFFFFFFFFFFFFFFFFFFFFFFFFFFFFFFFFFFFFFFFFFFFFFFFFFFFFF  
FFFFFFFFFFFFFFFFFFFFFFFFFFFFFFFFFFFFFFFFFFFFFFFFFFFFFFFFFFFFFFFFFFFFFFFFF  
@A00155:342:HHGFNDSXY:1:1563:1515:31673 1:N:0:GAACCTAG+TCCGCATA  
AGCACGGTATCCTCTGCCGAAACAGAGGTTGGACAAGACCGGAGGGGTCTCCTGGTTCCAAAGGAGAT  
GTACTCCGGGCTTGTTACGACCTACCGTGTAAAGTCGTAGTCTAGTAGGCTACCTGACGAGTCCTTTT  
+  
FFFFFFFFFFFFFFFFFFFFFFFF:FFFFFFFFFFFFFFFFFFFFFFFFFFFFFFFFFFFFFFFFFFFFFFFFFFFFF  
FFFFFFFFFFFFFFFFFFFFF,FFFFFFFFFFFFFFFFFFFFFFFFFFFFFFFFFFFFFFFFFFFFFFFFFFFFF  
@A00155:342:HHGFNDSXY:1:1563:2772:35008 1:N:0:GAACCTAG+TCCGCATA  
GGATGTGGAGGGCGAGAGAGAGCGACTTCTCTCGGGCCACAGCCTTACAGCTGTGGTGCACGGTATC  
CTCTGCCGAAACAGAGGTTGGACAAGACCGGAGGGGTCTCCTAGTTCCAAAGGAGATGTACTCC  
+  
FFFFFFFFFFFFFFFFFFFFFFFFFFFFFFFFFFFFFFFFFFFFFFFFFFFFFFFFFFFFFFFFFFFFFFFFF  
FFFFFFFFFFFFFFFFFFFFFFFFFFFFFFFFF,FFFFFFFFFFFFFFFFFFFFFFFFFFFFFFFFFFFFFFFFFFFFF:FFFFFFFFFFFFF  
@A00155:342:HHGFNDSXY:1:1564:8486:34225 1:N:0:GAACCTAG+TCCGCATA  
CTTCTCTCGGGCCACAGCCTTACAGCTGTGGAGCACGGTATCCTCTGCCGAAACAGAGGTTGGACAA  
GACCGGAGGGGTCTCCTAGTTCCAAAGGAGATGTACTCCGGGCTTGTTACGACCTACCGTGTAAAGTC  
+  
FFFFFFFFFFFFFFFFFFFFFFFFFFFFFFFFFFFFFFFFFFFFFFFFFFFFFFFFFFFFFFFFFFFFFFFFF  
FFFFFFFFFFFFFFFFFFFFFFFFFFFFFFFFFFFFFFFFFFFFFFFFFFFFFFFFFFFFFFFFFFFFFFFFF  
@A00155:342:HHGFNDSXY:1:1565:30373:6277 1:N:0:GAACCTAG+TCCGCATA  
TTCTCTCGGGCCACAGCCTTACAGCTGTGGAGCACGGTATCCTCTGCCGAAACAGAGGTTGGACAAG  
ACCGGAGGGGTCTCCTAGTTCCAAAGGAGATGTACTCCGGGCTTGTTACGACCTACCGTGTAAAGTCG  
+  
F,F:F,FF::FFFFFFFFFFFFF,FFFF:FFFFFFFFF,FFFF:FFFFFFFFFFFFFFFFF:FFFFFFFFF  
F:FFFFF,::FFFFF:FFF:F,FFFFFFFFFFFFFFFFFFFFFFFFFFFFFFFFF,FFFFFFFFFFFFFFFFFFFFF  
@A00155:342:HHGFNDSXY:1:1565:23014:19366 1:N:0:GAACCTAG+TCCGCATA  
GAGAGAGCGACTTCTCTCGGGCCACAGCCTTACAGCTGTGGAGCACGGTATCCTCTGCCGAAACAGAG  
GTTGGACAAGACCGGAGGGGTCTCCTGGTTCCAAAGGAGATGTACTCCGGGCTTGTTACGACCTAC  
+  
FFFFFFFFFFFFFFFFFFFFFFFFFFFFFFFFFFFFFFFFFFFFFFFFFFFFFFFFFFFFFFFFFFFFFFFFF  
FFFFFFFFFFFFFFFFFFFFFFFFFFFFFFFFFFFFFFFFFFFFFFFFFFFFFFFFFFFFFFFFFFFFFFFFF  
@A00155:342:HHGFNDSXY:1:1565:32307:26694 1:N:0:GAACCTAG+TCCGCATA  
TTCTCTCGGGCCACAGCCTTACAGCTGTGGAGCACGGTATCCTCTGCCGAAACAGAGGTTGGACAAG  
ACCGGAGGGGTCTCCTAGTTCCAAAGGAGATGTACTCCGGGCTTGTTACGACCTACCGTGTAAAGTCG  
+  
FFFFFFFFFFFFFFFFFFFFFFFFFFFFFFFFFFFFFFFFFFFFFFFFFFFFFFFFFFFFFFFFFFFFFFFFF  
FFFFFFFFFFFFFFFFFFFFF:FFFFFFFFFFFFFFFFFFFFFFFFFFFFFFFFF::FFFFFFFFFFFFFFFFFFFFF  
@A00155:342:HHGFNDSXY:1:1565:29134:33473 1:N:0:GAACCTAG+TCCGCATA  
AGAGAGAGCGACTTCTCTCGGGCCACAGCCTTACAGCTGTGGAGCACGGTATCCTCTGCCGAAACAG

AGGTTGGACAAGACCGGAGGGGTCTCCTAGTTCCAAAGGAGATGTACTCCGGGCTTGTTACACGACCTA  
+  
FFFFFFFFFFFFFFFFFFFFFFFFFFFFFFFFFFFFFFFFFFFFFFFFFFFFFFFFFFFFFFFFFFFFFFFF  
FFFFFFFFFFFFFFFFFFFFFFFFFFFFFFFFFFFFFFFFFFFFFFFFFFFFFFFFFFFFFFFFFFFFFFFF  
@A00155:342:HHGFNDSXY:1:1566:30445:1391 1:N:0:GAACCTAG+TCCGCATA  
GAGCGACTTCTCTCGGGCCCACAGCCTTACAGCTGTGGAGCACGGTATCCTCTGCCGAAACAGAGGTT  
GGACAAGACCGGAGGGGTCTCCTAGTTCCAAAGGAGATGTACTCCGGGCTTGTTACACGACCTACCGTG  
+  
FFFFFFFFFFFFFFFFFFFFFFFFFFFFFFFFFFFFFFFFFFFFFFFFFFFFFFFFFFFFFFFFFFFFFFFF  
FFFFFFFFFFFFFFFFFFFFFFFFFFFFFFFFFFFFFFFFFFFFFFFFFFFFFFFFFFFFFFFFFFFFFFFF  
@A00155:342:HHGFNDSXY:1:1566:31991:2942 1:N:0:GAACCTAG+TCCGCATA  
GAGCGACTTCTCTCGGGCCCACAGCCTTACAGCTGTGGAGCACGGTATCCTCTGCCGAAACAGAGGTT  
GGACAAGACCGGAGGGGTCTCCTAGTTCCAAAGGAGATGTACTCCGGGCTTGTTACACGACCTACCGTG  
+  
FFFFF:FFFFFFFFFFFFFFFFFFFFFFFFFFFFFFFFFFFFFFFFFFFFFFFFFFFFFFFFFFFFFFFF  
FFFFFFFFFFFFFFFFFFFFFFFFFFFFFFFFFFFFFFFFFFFFFFFFFFFFFFFFFFFFFFFFFFFFFFFF  
@A00155:342:HHGFNDSXY:1:1566:11288:8829 1:N:0:GAACCTAG+TCCGCATA  
CCTCTGGCCTATGGTCATCTCAATGCCGAGAGGGATGTGGAGGGCGAGAGAGAGCGACTTCTCTCGGG  
CCCACAGCCTTACAGCTGTGGAGCACGGTATCCTCTGCCGAAACAGAGGTTGGACAAGACCGGA  
+  
FFFFFFFFFFFFFFFFFFFFFFFFFFFFFFFFFFFFFFFFFFFFFFFFFFFFFFFFFFFFFFFFFFFFFFFF  
FFFFFFFFFFFFFFFFFFFFFFFFFFFFFFFFFFFFFFFFFFFFFFFFFFFFFFFFFFFFFFFFFFFFFFFF  
@A00155:342:HHGFNDSXY:1:1566:18258:13823 1:N:0:GAACCTAG+TCCGCATA  
TTACAGCTGTGGAGCACGGTATCCTCTGCCGAAACAGAGGTTGGACAAGACCGGAGGGGTCTCCTAGT  
TCCAAAGGAGATGTACTCCGGGCTTGTTACACGACCTACCGTGTAAGTCGTAGTCTAGTAGGCTACCTG  
+  
FFFFFFFFFFFFFFFFFFFFFFFFFFFFFFFFFFFFFFFFFFFFFFFFFFFFFFFFFFFFFFFFFFFFFFFF  
FFFFFFFFFFFFFFFFFFFFFFFFFFFFFFFFFFFFFFFFFFFFFFFFFFFFFFFFFFFFFFFFFFFFFFFF  
@A00155:342:HHGFNDSXY:1:1566:19289:24158 1:N:0:GAACCTAG+TCCGCATA  
TTCTCTCGGGCCCACAGCCTTACAGCTGTGGAGCACGGTATCCTCTGCCGAAACAGAGGTTGGACAAG  
ACCGGAGGGGTCTCCTGGTTCCAAAGGAGATGTACTCCGGGCTTGTTACACGACCTACCGTGTAAGTCG  
+  
FFFFFFFFFFFFFFFFFFFFFFFFFFFFFFFFFFFFFFFFFFFFFFFFFFFFFFFFFFFFFFFFFFFFFFFF  
FFFFFFFFFFFFFFFFFFFFFFFFFFFFFFFFFFFFFFFFFFFFFFFFFFFFFFFFFFFFFFFFFFFFFFFF  
@A00155:342:HHGFNDSXY:1:1566:31367:26663 1:N:0:GAACCTAG+TCCGCATA  
ATCTCAATGCCGAGAGGGATGTGGAGGGCGAGAGAGAGCGACTTCTCTCGGGCCCACAGCCTTACAGC  
TGTGGAGCACGGTATCCTCTGCCGAAACAGAGGTTGGACAAGATCGGAGGGGTCTCCTAGTTCCAAAG  
+  
FFFFFFFFFFFFFFFFFFFFFFFFFFFFFFFFFFFFFFFFFFFFFFFFFFFFFFFFFFFFFFFFFFFFFFFF  
FFFFFFFFFFFFFFFFFFFFFFFFFFFFFFFFFFFFFFFFFFFFFFFFFFFFFFFFFFFFFFFFFFFFFFFF  
@A00155:342:HHGFNDSXY:1:1566:28113:34961 1:N:0:GAACCTAG+TCCGCATA  
CCGAAACAGAGGTTGGACAAGACCGGAGGGGTCTCCTAGTTCCAAAGGAGATGTACTCCGGGCTTGTT  
CACGACCTACCGTGTAAGTCGTAGTCTAGTAGGCTACCTGATGAGTCCTTTTAGGACGAAAC  
+  
FFFFFFFFFFFFFFFFFFFFFFFFFFFFFFFFFFFFFFFFFFFFFFFFFFFFFFFFFFFFFFFFFFFFFFFF  
FFFFFFFFFFFFFFFFFFFFFFFFFFFFFFFFFFFFFFFFFFFFFFFFFFFFFFFFFFFFFFFFFFFFFFFF  
@A00155:342:HHGFNDSXY:1:1566:6903:35556 1:N:0:GAACCTAG+TCCGCATA  
ACTTCTCTCGGGCCCACAGCCTTACAGCTGTGGAGCACGGTATCCTCTGCCGAAACAGAGGTTGGACA  
AGACCGGAGGGGTCTCCTAGTTCCAAAGGAGATGTACTCCGGGCTTGTTACACGACCTACCGTGTAAGT  
+  
FFFFFFFFFFFFFFFFFFFFFFFFFFFFFFFFFFFFFFFFFFFFFFFFFFFFFFFFFFFFFFFFFFFFFFFF, FFFFFFFFFFFFFFFFFF  
FFFFFFFFFFFFFFFFFFFFFFFFFFFFFFFFFFFFFFFFFFFFFFFFFFFFFFFFFFFFFFFFFFFFFFFF: FFFFFFFF  
@A00155:342:HHGFNDSXY:1:1567:4661:2394 1:N:0:GAACCTAG+TCCGCATA  
AGCGACTTCTCTCGGGCCCACAGCCTTACAGCTGTGGAGCACGGTATCCTCTGCCGAAACAGAGGTTG

GACAAGACCGGAGGGGTCTCCTAGTTCCAAAGGAGATGTACTCCGGGCTTGTTACGACCTACCGTGT  
+  
FFFFFFFFFFFFFFFFFFFFFFFFFFFFFFFFFFFFFFFFFFFFFFFFFFFFFFFFFFFFFFFFFFFFFFFFFFFF, FFFFFFFFFFFFFFFFFFFFFFFFFFFFFFFF  
FFFFFFFFFFFFFFFFFFFFFFFFFFFFFFFFFFFFFFFFFFFFFFFFFFFFFFFFFFFFFFFFFFFFFFFFFFFFFFFF  
@A00155:342:HHGFNDSXY:1:1567:8467:10269 1:N:0:GAACCTAG+TCCGCATA  
TTACAGCTGTGGAGCACGGTATCCTCTGCCGAAACAGAGGTTGGACAAGACCGGAGGGGTCTCCTAGT  
TCCAAAGGAGATGTACTCCGGGCTTGTTACGACCTACCGTGTAAGTCGTAGTCTAGTAGGCTACCTG  
+  
FFFFFFFFFFFFFFFFFFFFFFFFFFFFFFFFFFFFFFFFFFFFFFFFFFFFFFFFFFFFFFFFFFFFFFFFFFFFFFFF  
FFFFFFFFFFFFFFFFFFFFFFFFFFFFFFFFFFFFFFFFFFFFFFFFFFFFFFFFFFFFFFFFFFFFFFFFFFFFFFFF  
@A00155:342:HHGFNDSXY:1:1567:23990:10911 1:N:0:GAACCTAG+TCCGCATA  
CCTTACAGCTGTGGAGCACGGTATCCTCTGCCGAAACAGAGGTTGGACAAGACCGGAGGGGTCTCCTA  
GTTCCAAAGGAGATGTACTCCGGGCTTGTTACGACCTACCGTGTAAGTCGTAGTCTAGTAGGCTACC  
+  
FFFFFFFFFFFFFFFFFFFFFFFFFFFFFFFFFFFFFFFFFFFFFFFFFFFFFFFFFFFFFFFFFFFFFFFFFFFFFFFF  
FFFFFFFFFFFFFFFFFFFFFFFFFFFFFFFFFFFFFFFFFFFFFFFFFFFFFFFFFFFFFFFFFFFFFFFFFFFFFFFF  
@A00155:342:HHGFNDSXY:1:1567:9778:13792 1:N:0:GAACCTAG+TCCGCATA  
GAGAGCGACTTCTCTCGGGCCCACAGCCTTACAGCTGTGGAGCACGGTATCCTCTGCCGAAACAGAGG  
TTGGACAAGACCGGAGGGGTCTCCTAGTTCCAAAGGAGATGTACTCCGGGCTTGTTACGACCTACCG  
+  
FFFFFFFFFF:FFFFFFFFFFFFFFFFFFFFFFFFFFFFFFFFFFFFFFFFFFFFFFFFFFFFFFFFFFFFFFFFFFFF  
FFFFFFFFFF:FFFFFFFFFFFFFFFFFFFFFFFFFFFFFFFFFFFFFFFFFFFFFFFFFFFFFFFFFFFFFFFFFFFF  
@A00155:342:HHGFNDSXY:1:1567:7545:16626 1:N:0:GAACCTAG+TCCGCATA  
TTACAGCTGTGGAGCACGGTATCCTCTGCCGAAACAGAGGTTGGACAAGACCGGAGGGGTCTCCTAGT  
TCCAAAGGAGATGTACTCCGGGCTTGTTACGACCTACCGTGTAAGTCGTAGTCTAGTAGGCTACCTG  
+  
FFFFFFFFFFFFFFFFFFFFFFFFFFFFFFFFFFFFFFFFFFFFFFFFFFFFFFFFFFFFFFFFFFFFFFFFFFFFFFFF  
FFFFFFFFFFFFFFFFFFFFFFFFFFFFFFFFFFFFFFFFFFFFFFFFFFFFFFFFFFFFFFFFFFFFFFFFFFFFFFFF  
@A00155:342:HHGFNDSXY:1:1567:29514:23046 1:N:0:GAACCTAG+TCCGCATA  
AAGGACTCACCTCTGGCCTATGGTCATCTCTATGCCGAGAGGGATGTGGAGGGCGAGAGAGAGCGACT  
TCTCTCGGGCCCACAGCCTTACAGCTGTGGAGCACGGTATCCTCTGCCGAAACAGAGGTTGGACAAGA  
+  
FFFFFFFFFFFFFFFFFFFFFFFFFFFFFFFFFFFFFFFFFFFFFFFFFFFFFFFFFFFFFFFFFFFFFFFFFFFFFFFF  
FFFFFFFFFFFFFFFFFFFFFFFFFFFFFFFFFFFFFFFFFFFFFFFFFFFFFFFFFFFFFFFFFFFFFFFFFFFFFFFF  
@A00155:342:HHGFNDSXY:1:1567:27805:30358 1:N:0:GAACCTAG+TCCGCATA  
GTATCCTCTGCCGAAACAGAGGTTGGACAAGACCGGAGGGGTCTCCTAGTTCCAAAGGAGATGTACTC  
CGGGCTTGTTACGACCTACCGTGTAAGTCGTAGTCTAGTAGGCTACCTGACGAGTCCTTTTTAGGAC  
+  
FFFFFFFFFFFFFFFFFFFFFFFFFFFFFFFFFFFFFFFFFFFFFFFFFFFFFFFFFFFFFFFFFFFFFFFFFFFFFFFF  
FFFFFFFFFFFFFFFFFFFFFFFFFFFFFFFFFFFFFFFFFFFFFFFFFFFFFFFFFFFFFFFFFFFFFFFFFFFFFFFF  
@A00155:342:HHGFNDSXY:1:1568:31575:29183 1:N:0:GAACCTAG+TCCGCATA  
TTAAGGACTCACCTCTGGCCTATGGTCATCTCAATGCCGAGAGGGATGTGGAGGGCGAGAGAGAGCGA  
CTTCTCTCGGGCCCACAGCCTTACAGCTGTGGAGCACGGTATCCTCTGCCGAAACAGAGGTTGGACAA  
+  
F:FFFFFFFFFFFFFFFFFFFFFFFFFFFFFFFFFFFFFFFFFFFFFFFFFFFFFFFFFFFFFFFFFFFFFFFFFFFF  
FFFFFFFFFFFFFFFFFFFFFFFFFFFFFFFFFFFFFFFFFFFFFFFFFFFFFFFFFFFFFFFFFFFFFFFFFFFF,F  
@A00155:342:HHGFNDSXY:1:1569:9046:7263 1:N:0:GAACCTAG+TCCGCATA  
CTTCTCTCGGGCCCACAGCCTTACAGCTGTGGAGCACGGTATCCTCTGCCGAAACAGAGGTTGGACAA  
GACCGGAGGGGTCTCCTAGTTCCAAAGGAGATGTACTCCGGGCTTGTTACGACCTACCGTGTAAGTC  
+  
FFFFFFFFFFFFFFFFFFFFFFFFFFFFFFFFFFFFFFFFFFFFFFFFFFFFFFFFFFFFFFFFFFFFFFFFFFFFFFFF  
FFFFFFFFFFFFFFFFFFFFFFFFFFFFFFFFFFFFFFFFFFFFFFFFFFFFFFFFFFFFFFFFFFFFFFFFFFFFFFFF  
@A00155:342:HHGFNDSXY:1:1569:1542:17534 1:N:0:GAACCTAG+TCCGCATA  
GATCAGCTGTGTCCACTTAAGGACTCACCTCTGGCCAATGGTCATCTCAATGCCGAGAGGGATGTGGA

GGGCGAGAGAGAGCGACTTCTCTCGGGCCCACAGCCTTACAGCTGTGGAGCACGGTATCCTCTGC  
+  
FFFFFFFFFFFFFFFFFFFFFFFFFFFFFFFFFFFFFFFFFFFFFFFFFFFFFFFFFFFFFFFFFFFFFFFF  
FFFFFFFF:F:F:FFF:FFFFFFFFFFFFFFFFFFFFFFFF:FFFFFFFFFFFFFFFFFFFFFFFF  
@A00155:342:HHGFNDSXY:1:1569:22553:20509 1:N:0:GAACCTAG+TCCGCATA  
AGAGAGAGCGACTTCTCTCGGGCCCACAGCCTTACAGCTGTGGAGCACGGTATCCTCTGCCGAAACAG  
AGGTTGGACAAGACCGGAGGGGTCTCCTGGTTCCAAAGGAGATGTACTCCGGGCTTGTTACGACCTA  
+  
FFFFFFFFFFFFFFFFFFFFFFFFFFFFFFFFFFFFFFFFFFFFFFFFFFFFFFFFFFFFFFFFFFFFFFFF  
FFFFFFFFFFFF:FFFFFF:FFFFFFFFFFFFFFFFFFFFFFFFFFFFFFFFFFFFFFFFFFFFFFFF  
@A00155:342:HHGFNDSXY:1:1569:21522:21073 1:N:0:GAACCTAG+TCCGCATA  
TTCTCTCGGGCCCACAGCCTTACAGCTGTGGAGCACGGTATCCTCTGCCGAAACAGAGGTTGGACAAG  
ACCGGAGGGGTCTCCTAGTTCCAAAGGAGATGTACTCCGGGCTTGTTACGACCTACCGTGTAAGTCG  
+  
FFFFFFFFFFFFFFFFFFFFFFFFFFFFFFFFFFFFFFFFFFFFFFFFFFFFFFFFFFFFFFFFFFFFFFFF  
FFFFFFFFFFFFFFFFFFFF:FFFFF:FFFFFFFFFFFFFFFFFFFFFFFFFFFFFFFFFFFFFFFFFFFF  
@A00155:342:HHGFNDSXY:1:1569:29668:26882 1:N:0:GAACCTAG+TCCGCATA  
CTCCTCTGGCCTATGGTCATCTCAATGCCGAGAGGGATGTGGAGGGCGAGAGAGAGCGACTTCTCTCG  
GGCCCACAGCCTTACAGCTGTGGAGCACGGTATCCTCTGCCGAAACAGAGGTTGGACAAGACCGGAGG  
+  
FFF,F:F:F:F,FFF,:FFFFFF:FFFF::FF:FFFFFFFFFFFF,FFFFF::F:F:FFF:F,FFFF:F  
FF:F,FFF:FFFFFFFFFFFFFFFFFFFFFFFF,FFF,FFFFFFFFFFFF:FF,FF,,FFFFFFFFFFFF:F::  
@A00155:342:HHGFNDSXY:1:1569:12780:30076 1:N:0:GAACCTAG+TCCGCATA  
CTATGGTCATCTCAATGCCGAGAGGGATGTGGAGGGCGAGAGAGAGCGACTTCTCTCGGGCCCACAGC  
CTTACAGCTGTGGAGCACGGTATCCTCTGCCGAAACAGAGGTTGGACAAGACCGGAGGGGTCTCCTAG  
+  
:F:FFFFFFFFFFFFFFFFFFFF:FFFFFFFFFFFFFFFFFFFFFFFFFFFFFFFFFFFFFFFFFFFF:FFFFFFFFFFFFFFFFFFFF  
FFFFFFFFFFFF,FFFF:FFFFFFFFFFFFFFFFFFFFFFFFFFFFFFFFFFFFFFFFFFFF:FFFFFFFFFFFFFFFFFFFF  
@A00155:342:HHGFNDSXY:1:1570:10592:5525 1:N:0:GAACCTAG+TCCGCATA  
ATCTCAATGCCGAGAGGGATGTGGAGGGCGAGAGAGAGCGACTTCTCTCGGGCCCACAGCCTTACAGC  
TGTGGAGCACGGTATCCTCTGCCGAAACAGAGGTTGGACAAGACCGGAGGGGTCTCCTGGTTCCAAAG  
+  
FFFFFFFFFFFFFFFFFFFFFFFFFFFFFFFFFFFFFFFFFFFF:FFFFFFFFFFFFFFFFFFFFFFFFFFFF  
FFFFFFFFFFFFFFFFFFFFFFFFFFFFFFFFFFFFFFFFFFFFFFFFFFFFFFFFFFFFFFFFFFFFFFFF  
@A00155:342:HHGFNDSXY:1:1570:14253:8672 1:N:0:GAACCTAG+TCCGCATA  
CTCGGGCCCACAGCCTTACAGCTGTGGAGCACGGTATCCTCTGCCGAAACAGAGGTTGGACAAGACCG  
GAGGGGTCTCCTAGTTCCAAAGGAGATGTACTCCGGGCTTGTTACGACCTACCGTGTAAGTCGTAGT  
+  
FFFFFFFFFFFFFFFFFFFFFFFFFFFFFFFFFFFFFFFFFFFF:FFFFFFFFFFFFFFFFFFFFFFFFFFFF  
FFFFFFFFFFFFFFFFFFFFFFFFFFFFFFFFFFFFFFFFFFFFFFFFFFFFFFFFFFFFFFFFFFFFFFFF  
@A00155:342:HHGFNDSXY:1:1570:29252:8719 1:N:0:GAACCTAG+TCCGCATA  
TCCTCTGCCGAAACAGAGGTTGGACAAGACCGGAGGGGTCTCCTAGTTCCAAAGGAGATGTACTCCGG  
GCTTGTTACGACCTACCGTGTAAGTCGTAGTCTAGTAGGCTACCTGACGAGTCCTTTTTAGGACGAA  
+  
FFFFFFFFFFFFFFFFFFFFFFFFFFFFFFFFFFFF:FFFFFFFFFFFFFFFFFFFFFFFFFFFFFFFFFFFF  
FFFFFFFFFFFFFFFFFFFFFFFFFFFFFFFFFFFFFFFFFFFFFFFFFFFFFFFFFFFFFFFFFFFFFFFF  
@A00155:342:HHGFNDSXY:1:1571:14145:2942 1:N:0:GAACCTAG+TCCGCATA  
CTTCTCTCGGGCCCACAGCCTAACAGCTGTGGAGCACGGTATCCTCTGCCGAAACAGAGGTTGGACAA  
GACCGGAGGGGTCTCCTAGTTCCAAAGGAGATGTACTCCGGGCTTGTTACGACCTACCGTGTAAGTC  
+  
:FFFFFFFFFFFFFFFFFFFFFFFFFFFF:F,:FFFFFF,FFFFFFFFFFFFFFFFFFFFFFFFFFFF  
FFFFFFFFFFFFFFFFFFFFFFFFFFFFFFFFFFFF:FFFFFFFFFFFFFFFFFFFFFFFFFFFF:FFFFFFF  
@A00155:342:HHGFNDSXY:1:1571:22281:8453 1:N:0:GAACCTAG+TCCGCATA  
GGCGAGAGAGAGCGACTTCTCTCGGGCCCACAGCCTTACAGCTGTGGAGCACGGTATCCTCTGCCGAA

ACAGAGGTTGGACAAGACCGGAGGGGTCTCCTAGTTCCAAAGGAGATGTACTCCGGGCTTGTTACGA  
+  
FFFFFFFFFFFFFF:FFFFFFFFFFFFFFFFFFFFFFFFFFFFFFFFFFFFFFFFFFFFFFFFFFFFFFFF  
FFFFFFFFFFFFFFFFFFFFFFFFFFFFFFFFFFFFFFFFFFFFFFFFFFFFFFFFFFFFFFFFFFFFFFFF  
@A00155:342:HHGFNDSXY:1:1571:14443:11600 1:N:0:GAACCTAG+TCCGCATA  
GAGCGACTTCTCTCGGGCCACAGCCTTACAGCTGTGGAGCACGGTATCCTCTGCCGAAACAGAGGTT  
GGACAAGACCGGAGGGGTCTCCTAGTTCCAAAGGAGATGTACTCCGGGCTTGTTACGACCTACCGTG  
+  
FFFFFFF:FFFFFFFFFFFFFFFFFFFFFFFFFFFFFFFFFFFFFFFFFFFFFFFFFFFFFFFFFFFFFFF:FFFFFFF:FFFFFFFFFFFFFFF  
FFFFFFFFFFFFFFFFFFFFFFFFFFFFFFFFFFFFFFFFFFFFFFFFFFFFFFFFFFFFFFFFFFFFFFFF  
@A00155:342:HHGFNDSXY:1:1571:18665:29215 1:N:0:GAACCTAG+TCCGCATA  
ACCTCTGTTTCGGCAGAGGATACCGTGCTCCACAGCTGTAAGGCTGTGGGCCCCGAGAGAAGTCGCTCT  
CTCTCGCCCTTACATCCCTCTCGGCATTGAGATGACCATAGGCCAGAGGTGAGTCCTTAAGTGGACA  
+  
FFFFFFFFFFFFFFFFFFFFFFFFFFFFFFFFFFFFFFFFFFFFFFFFFFFFFFFFFFFFFFFFFFFFFFFF  
FFFFFFFFFFFFFFFFFFFFFFFFFFFFFFFFFFFFFFFFFFFFFFFFFFFFFFFFFFFFFFFFFFFFFFFF  
@A00155:342:HHGFNDSXY:1:1571:18855:36057 1:N:0:GAACCTAG+TCCGCATA  
ACCTCTGTTTCGGCAGAGGATACCGTGCTCCACAGCTGTAAGGCTGTGGGCCCCGAGAGAAGTCGCTCT  
CTCTCGCCCTTACATCCCTCTCGGCATTGAGATGACCATAGGCCAGAGGTGAGTCCTTAAGTGGAC  
+  
FFFFFFFFFFFFFFFFFFFFFFFFFFFFFFFFFFFFFFFFFFFFFFFFFFFFFFFFFFFFFFFFFFFFFFFF  
FFFFFFFFFFFF:FFFFFFFFFFFFFFFFFFFFFFFFFFFFFFFFFFFFFFFFFFFFFFFFFFFFFFFF  
@A00155:342:HHGFNDSXY:1:1571:18783:36683 1:N:0:GAACCTAG+TCCGCATA  
ACCTCTGTTTCGGCAGAGGATACCGTGCTCCACAGCTGTAAGGCTGTGGGCCCCGAGAGAAGTCGCTCT  
CTCTCGCCCTTACATCCCTCTCGGCATTGAGATGACCATAGGCCAGAGGTGAGTCCTTAAGTGGACA  
+  
FFFFFFFFFFFFFFFFFFFFFFFFFFFFFFFFFFFFFFFFFFFFFFFFFFFFFFFFFFFFFFFFFFFFFFFF  
FFFFFFFFFFFFFFFFFFFFFFFFFFFFFFFFFFFFFFFFFFFFFFFFFFFFFFFFFFFFFFFFFFFFFFFF  
@A00155:342:HHGFNDSXY:1:1572:30581:4726 1:N:0:GAACCTAG+TCCGCATA  
CTCTGCCGAAACAGAGGTTGGACAAGACCGGAGGGGTCTCCTAGTTCCAAAGGAGATGTACTCCGGGC  
TTGTTACGACCTACCGTGTAAGTCGTAGTCTAGTAGGCTACCTGACGAGTCCTTTTAGGACGAAAC  
+  
FFFFFFFFFFFFFFFFFFFFFFFFFFFFFFFFFFFFFFFFFFFFFFFFFFFFFFFFFFFFFFFFFFFFFFFF  
FFFFFFFFFFFFFFFFFFFFFFFFFFFFFFFFFFFFFFFFFFFFFFFFFFFFFFFFFFFFFFFFFFFFFFFF  
@A00155:342:HHGFNDSXY:1:1572:21332:7905 1:N:0:GAACCTAG+TCCGCATA  
CAATGCCGAGAGGGATGTGGAGGGCGAGAGAGAGCGACTTCTCTCGGGCCCACAGCCTTACAGCTGTG  
GAGCACGGTATCCTCTGCCGAAACAGAGGTTGGACAAGACCGGAGGGGTCTCCTGGTTCCAAAGGAG  
+  
FFFFFFFFFFFFFFFFFFFFFF:FFFFFFFFFFFFFFFFFFFFFFFFFFFFFFFFFFFFFFFFFFFFFFFF  
FFFFFFFFFFFFFFFFFFFFFFFFFFFFFFFFFFFFFFFFFFFFFFFFFFFFFFFFFFFFFFFFFFFFFFFF  
@A00155:342:HHGFNDSXY:1:1572:26937:19492 1:N:0:GAACCTAG+TCCGCATA  
GAGGGCGAGAGAGAGCGACTTCTCTCGGGCCCACAGCCTTACAGCTGTGGAGCACGGTATCCTCTGCC  
GAAACAGAGGTTGGACAAGACCGGAGGGGTCTCCTAGTTCCAAAGGAGATGTACTCCGGGCTTGTTCA  
+  
FFFFFFFFFFFFFFFFFFFFFFFFFFFFFFFFFFFFFFFFFFFFFFFFFFFFFFFFFFFFFFFFFFFFFFFF  
FFFFFFFFFFFFFFFFFFFFFFFFFFFFFFFFFFFFFFFFFFFFFFFFFFFFFFFFFFFFFFFFFFFFFFFF  
@A00155:342:HHGFNDSXY:1:1572:31376:24361 1:N:0:GAACCTAG+TCCGCATA  
CCTTACAGCTGTGGAGCACGGTATCCTCTGCCGAAACAGAGGTTGGACAAGACCGGAGGGGTCTCCTG  
GTTCCAAAGGAGATGTACTCCGGGCTTGTTACGACCTACCGTGTAAGTCGTAGTCTAGTAGGCTACC  
+  
FFFFFFFFFFFFFFFFFFFFFFFFFFFFFFFFFFFFFFFFFFFFFFFFFFFFFFFFFFFFFFFFFFFFFFFF  
FFFFFFFFFFFFFFFFFFFFFFFFFFFFFFFFFFFFFFFFFFFFFFFFFFFFFFFFFFFFFFFFFFFFFFFF  
@A00155:342:HHGFNDSXY:1:1572:12753:25676 1:N:0:GAACCTAG+TCCGCATA  
CTTCTCTCGGGCCCACAGCCTTACAGCTGTGGAGCACGGTATCCTCTGCCGAAACAGAGGTTGGACAA



GACCGAGGGGTCTCCTAGTTCCAAAGGAGATGTACTCCGGGCTTGTTACACGACCTACCGTGTAAGTC  
+  
FFFFFFFFFFFFFFFFFFFFFFFFF:FFFFFFFFFFFFFFFFFFFFFFFFFFFFFFFFFFFFFFFFFFFFF  
FFFFFFFFFFFFFFFFFFFFFFFFFFFFFFFFFFFFFFFFFFFFFFFFFFFFFFFFFFFFFFFFFFFFFFFFF:FFFFFFF  
@A00155:342:HHGFNDSXY:1:1572:22055:26725 1:N:0:GAACCTAG+TCCGCATA  
ACCTCTGTTTCGGCAGAGGATACCGTGCTCCACAGCTGTAAGGCTGTGGCCCCGAGAGAAGTCGCTCT  
CTCTCGCCCTCCACATCCCTCTCGGCATTGAGATGACCATAGGCCAGAGGTGAGTCCTTAAGTGGAC  
+  
FFFFFFFFFFFFFFFFFFFFFFFFFFFFFFFFFFFFFFFFFFFFFFFFFFFFFFFFFFFFFFFFFFFFFFFFF  
FFFFFFFFFFFFFFFFFFFFFFFFFFFFFFFFFFFFFFFFFFFFFFFFFFFFFFFFFFFFFFFFFFFFFFFFF:FFFFFFFFFFFFFFFFFFFFF  
@A00155:342:HHGFNDSXY:1:1572:25708:29763 1:N:0:GAACCTAG+TCCGCATA  
GGATGTGGAGGGCGAGAGAGAGCGACTTCTCTCGGGCCCACAGCCTTACAGCTGTGGAGCACGGTATC  
CTCTGCCGAAACAGAGGTTGGACAAGACCGGAGGGGTCTCCTAGTTCCAAAGGAGATGTACTCC  
+  
FFFFF:FFFFFFFFFFFFFFFFFFFFFFFFFFFFFFFFFFFFFFFFFFFFFFFFFFFFFFFFFFFFFFFFFFFFF:FFFFFFFFFFFFFFFFFFFFF  
FFFFFFFFFFFFFFFFFFFFFFFFFFFFFFFFFFFFFFFFFFFFFFFFFFFFFFFFFFFFFFFFFFFFFFFFF  
@A00155:342:HHGFNDSXY:1:1573:10357:6809 1:N:0:GAACCTAG+TCCGCATA  
TCCACTTAAGGACTCTCCTCTGGCCTATGGTCATCTCAATGCCGAGAGGGATGTGGAGGGCGAGAGAG  
AGCGACTTCTCTCGGGCCCACAGCCTTACAGCTGTGGAGCACGGTATCCTCTGCCGAAACAGAGGTTG  
+  
FFFFFF:FFFFFFFFFFFFFFFFFFFFFFFFFFFFFFFFFFFFFFFFFFFFFFFFFFFFFFFFFFFFFFFFFFF,FFFF,FFFFFFFFFFFFFFFFFFFFF  
FFFFFFFFFFFFFFFFFFFFFFFFFFFFFFFFFFFFFFFFFFFFFFFFFFFFFFFFFFFFFFFFFFFFFFFFF:F:FFFFFFFFFFFFFFFFFFFFFFFFFFFFFFFFFFFFFFFFFFFFFFFFFFFFF  
@A00155:342:HHGFNDSXY:1:1573:9579:19930 1:N:0:GAACCTAG+TCCGCATA  
CTTCTCTCGGGCCCACAGCCTTACAGCTGTGGAGCACGGTATCCTCTGCCGAAACAGAGGTTGGACAA  
GACCGGAGGGGTCTCCTAGTTCCAAAGGAGATGTACTCCGGGCTTGTTACACGACCTACCGTGTAAGTC  
+  
FFFFFFFFFFFFFFFFFFFFFFFFFFFFFFFFFFFFFFFFFFFFFFFFFFFFFFFFFFFFFFFFFFFFFFFFF  
FFFFFFFFFFFFFFFFFFFFFFFFFFFFFFFFFFFFFFFFFFFFFFFFFFFFFFFFFFFFFFFFFFFFFFFFF:FFFFFFFFFFFFFFFFFFFFFFFFFFFFFFFFFFFFFFFFFFFFFFFFFFFFF  
@A00155:342:HHGFNDSXY:1:1573:5746:21496 1:N:0:GAACCTAG+TCCGCATA  
CTTCTCTCGGGCCCACAGCCTTACAGCTGTGGAGCACGGTATCCTCTGCCGAAACAGAGGTTGGACAA  
GACCGGAGGGGTCTCCTAGTTCCAAAGGAGATGTACTCCGGGCTTGTTACACGACCTACCGTGTAAGTC  
+  
FFFFFFFFFFFFFFFFFFFFFFFFFFFFFFFFFFFFFFFFFFFFFFFFFFFFFFFFFFFFFFFFFFFFFFFFF,FFFFFFFFFFFFF:FFFFFFFFFFFFF:FFFFFF:FFFFFFFFFFFFF  
FFFFFFFFFFFFFFFFFFFFFFFFFFFFFFFFFFFFFFFFFFFFFFFFFFFFFFFFFFFFFFFFFFFFFFFFF:FFFFFFFFFFFFF  
@A00155:342:HHGFNDSXY:1:1573:21305:28839 1:N:0:GAACCTAG+TCCGCATA  
ACTTCTCTCGGGCCCACAGCCTTACAGCTGTGGAGCACGGTATCCTCTGCCGAAACAGAGGTTGGACA  
AGACCGGAGGGGTCTCCTAGTTCCAAAGGAGATGTACTCCGGGCTTGTTACACGACCTACCGTGTAAGT  
+  
FFFFFFFFFFFFFFFFFFFFFFFFFFFFFFFFFFFFFFFFFFFFFFFFFFFFFFFFFFFFFFFFFFFFFFFFF  
FFFFFFFFFFFFFFFFFFFFFFFFFFFFFFFFFFFFFFFFFFFFFFFFFFFFFFFFFFFFFFFFFFFFFFFFF:FFFFFFFFFFFFFFFFFFFFFFFFFFFFFFFFFFFFFFFFFFFFFFFFFFFFF  
@A00155:342:HHGFNDSXY:1:1573:25889:30201 1:N:0:GAACCTAG+TCCGCATA  
CTTCTCTCGGGCCCACAGCCTTACAGCTGTGGAGCACGGTATCCTCTGCCGAAACAGAGGTTGGACAA  
GACCGGAGGGGTCTCCTGGTTCCAAAGGAGATGTACTCCGGGCTTGTTACACGACCTACCGTGTAAGTC  
+  
FFFFFFFFFFFFFFFFFFFFFFFFFFFFFFFFFFFFFFFFFFFFFFFFFFFFFFFFFFFFFFFFFFFFFFFFF  
FFFFFFFFFFFFFFFFFFFFFFFFFFFFFFFFFFFFFFFFFFFFFFFFFFFFFFFFFFFFFFFFFFFFFFFFF:FF:FFFFFFFFFFFFFFFFFFFFFFFF:FFFFFFFFFFFFFFFFFFFFF  
@A00155:342:HHGFNDSXY:1:1573:8504:33098 1:N:0:GAACCTAG+TCCGCATA  
AGAGAGCGACTTCTCTCGGGCCCACAGCCTTACAGCTGTGGAGCACGGTATCCTCTGCCGAAACAGAG  
GTTGGACAAGACCGGAGGGGTCTCCTAGTTCCAAAGGAGATGTACTCCGGGCTTGTTACACGACCTACC  
+  
FFFFFFFFFFFFFFFFFFFFFFFFFFFFFFFFFFFFFFFFFFFFFFFFFFFFFFFFFFFFFFFFFFFFFFFFF  
FFFFFFFFFFFF,FFFFFFFFFFFFF:FFFFFFFFFFFFFFFFFFFFFFFFFFFFFFFFFFFFFFFFFFFFF  
@A00155:342:HHGFNDSXY:1:1573:8250:33599 1:N:0:GAACCTAG+TCCGCATA  
AGAGAGCGACTTCTCTCGGGCCCACAGCCTTACAGCTGTGGAGCACGGTATCCTCTGCCGAAACAGAG

GTTGGACAAGACCGGAGGGGTCTCCTAGTTCCAAAGGAGATGTACTCCGGGCTTGTTACGACCTACC  
+  
FFFFFFFFFFFFFFFFFFFFFFFFFFFFFFFFFFFFFFFFFFFFFFFFFFFFFFFFFFFFFFFFFFFFFFFF:FFFFFFFF  
FFFFFFFFFFFFFFFFFFFFFFFFFFFFFFFFFFFFFFFFFFFFFFFFFFFFFFFFFFFFFFFFFFFFFFFF:FFFFFFFFFFFFFFFF  
@A00155:342:HHGFNDSXY:1:1574:8684:29904 1:N:0:GAACCTAG+TCCGCATA  
TCCTCTGCCGAAACAGAGGTTGGACAAGACCGGAGGGGTCTCCTAGTTCCAAAGGAGATGTACTCCGG  
GCTTGTTACGACCTACCGTGTAAGTCGTAGTCTAGTAGGCTACCTGACGAGTCCTTTTTAGGACGAA  
+  
,FFFFFFFFFFFFFFF:FFFFFFFFF:F:FFFFFFFF:FFFFFFFF:FFFFFFFF:FFFF,F,F,FFFFFFFF  
FF:::FFFFF,F:FFFFFFFF,FFFF,FFFF:FF,FFFFFFFFFFFF:FF,FFF,FFF,,:,F,FFFFFFFF  
@A00155:342:HHGFNDSXY:1:1574:7319:32581 1:N:0:GAACCTAG+TCCGCATA  
CTTCTCTCGGGCCACAGCCTTACAGCTGTGGAGCACGGTATCCTCTGCCGAAACAGAGGTTGGACAA  
GACCGGAGGGGTCTCCTAGTTCCAAAGGAGATGTACTCCGGGCTTGTTACGACCTACCGTGTAAGTC  
+  
FFFFFFFFFFFFFFFFFFFFFFFFFFFFFFFFFFFFFFFFFFFFFFFFFFFFFFFFFFFFFFFFFFFFFFFF  
FFFFFFFFFFFFFFFFFFFFFFFFFFFFFFFFFFFFFFFFFFFFFFFFFFFFFFFFFFFFFFFFFFFFFFFF  
@A00155:342:HHGFNDSXY:1:1575:1551:1485 1:N:0:GAACCTAG+TCCGCATA  
GCGACTTCTCTCGGGCCACAGCCTTACAGCTGTGGAGCACGGTATCCTCTGCCGAAACAGAGGTTGG  
ACAAGACCGGAGGGGTCTCCTAGTTCCAAAGGAGATGTACTCCGGGCTTGTTACGACCTACCGTGTA  
+  
FFFFFFFFFFFFFFFFFFFFFFFFFFFFFFFFFFFFFFFFFFFFFFFFFFFFFFFFFFFFFFFFFFFFFFFF  
FFFFFFFFFFFFFFFFFFFFFFFFFFFFFFFFFFFFFFFFFFFFFFFFFFFFFFFFFFFFFFFFFFFFFFFF:  
@A00155:342:HHGFNDSXY:1:1575:3658:23359 1:N:0:GAACCTAG+TCCGCATA  
CCTCTGCCGAAACAGAGGTTGGACAAGACCGGAGGGGTCTCCTAGCTCCAAAGGAGATGTACTCCGGG  
CTTGTTACGACCTACCGTGTAAGTCGTAGTCTAGTAGGCTACCTGACGAGTCCTTTTTAGGACGAA  
+  
FFFF:FFFFFFFFFFFFFFFFF:,FFFFFFFFFFFF:F:FFF,FFFFFFFF:FFFFFFFFFFFFFFFFFFFF:FF  
FF::FFF:FFFFFFFFFFFF,FFFF:FFFFFFFFFFFF:F:FFF:F,FF:FFFFFF,FF:FFFFFFFF  
@A00155:342:HHGFNDSXY:1:1575:13928:26083 1:N:0:GAACCTAG+TCCGCATA  
GAGATGTACTCCGGGCTTGTTACGACCTACCGTGTAAGTCGTAGTCTAGTAGGCTACCTGACGAGTC  
CTTTTTAGGACGAACTTACACAACCTCGAAGAGTAACGACGGTTTCGTCCTTGAACGGACTIONCATCA  
+  
FFFFFFFFFFFFFFFFFFFFFFFFFFFFFFFFFFFFFFFFFFFFFFFFFFFFFFFFFFFFFFFFFFFFFFFF,FFFFFFFFFFFFFFFF  
FFFFFFFF,FFFFFFFF:FFFFFFFFFFFFFFFFFFFFFFFFFFFFFFFFFFFFFFFFFFFFFFFF:::FFFFFFFFFFFF  
@A00155:342:HHGFNDSXY:1:1576:6180:29951 1:N:0:GAACCTAG+TCCGCATA  
ATCTCAATGCCGAGAGGGATGTGGAGGGCGAGAGAGAGCGACTTCTCTCGGGCCACAGCCTTACAGC  
TGTGGAGCACGGTATCCTCTGCCGAAACAGAGGTTGGACAAGACCGGAGGGGTCTCCTGGTTCCAAAG  
+  
FFFFFFFFFFFFFFFFFFFFFFFFF:,FFFFFFFFFFFFFFFFFFFFFFFFFFFFFFFFFFFFFFFFFFFFFFFF  
FFFFFFFFFFFFFFFF:FFFFFFFFFFFFFFFFFFFFFFFF:FFFFFFFFFFFFFFFFFFFFFFFFFFFFFFFF  
@A00155:342:HHGFNDSXY:1:1576:1316:30138 1:N:0:GAACCTAG+TCCGCATA  
GGCCAGAGGTGAGTCCTTAAGTGGACACAGCTGATCTAAGGCGGTGTAGCGGGGCATGGGTTTGAACC  
CCCATGACGGTCGGAGTCTAGTAGGCTCCCTGATGAGTCCGTTCCAAGGACGAAACCGTCGTTACTCT  
+  
FFFFFFFFFFFFFFFFFFFFFFFFFFFFFFFFFFFFFFFFFFFFFFFFFFFFFFFFFFFFFFFFFFFFFFFF,FFFFFFFFFFFFFFFF  
FFFFFFFFFFFFFFFFFFFFFFFFFFFFFFFFFFFFFFFFFFFFFFFFFFFFFFFFFFFFFFFFFFFFFFFF,FFFFFFFFFFFFFFFF  
@A00155:342:HHGFNDSXY:1:1576:14488:32002 1:N:0:GAACCTAG+TCCGCATA  
TATCTCTGCCGAAACAGAGGTTGGACAAGACCGGAGGGGTCTCCTAGTTCCAAAGGAGATGTACTCC  
GGGCTTGTTACGACCTACCGTGTAAGTCGTAGTCTAGTAGGCTACCTGACGAGTCCTTTTTAGGACG  
+  
:FFFFFFFFFFFFFFFFFFFFFFFFFFFFFFFFFFFFFFFFFFFFFFFFFFFFFFFFFFFFFFFFFFFFFFFF  
FFFFF:FFFFFFFFFFFFFFFFFFFFFFFFFFFFFFFFFFFFFFFFFFFFFFFFFFFFFFFFFFFFFFFF:FFFF  
@A00155:342:HHGFNDSXY:1:1577:16721:11945 1:N:0:GAACCTAG+TCCGCATA  
GACTTCTCTCGGGCCACAGCCTTACAGCTGTGGAGCACGGTATCCTCTGCCGAAACAGAGGTTGGAC

AAGACCGGAGGGGTCTCCTAGTTCCAAAGGAGATGTACTCCGGGCTTGTTACACGACCTACCGTGT  
+  
FFFFFFFFFFFFFFFFFFFFFFFFFFFFFFFFFFFFFFFFFFFFFFFFFFFFFFFFFFFFFFFFFFFFFFFFFFFFFFFF  
FFFFFFFFFFFFFFFFFFFFFFFFFFFFFFFFFFFFFFFFFFFFFFFFFFFFFFFFFFFFFFFFFFFFFFFFFFFFFFFF,FF  
@A00155:342:HHGFNDSXY:1:1577:25446:20791 1:N:0:GAACCTAG+TCCGCATA  
CTTCTCTCGGGCCCACAGCCTTACAGCTGTGGAGCACGGTATCCTCTGCCGAAACAGAGGTTGGACAA  
GACCGGAGGGGTCTCCTAGTTCCAAAGGAGATGTACTCCGGGCTTGTTACACGACCTACCGTGTAAGTC  
+  
FFFFFFFFFFFFFFFFFFFFFFFFFFFFFFFFFFFFFFFFFFFFFFFFFFFFFFFFFFFFFFFFFFFFFFFFFFFFFFFF  
FFFFFFFFFFFFFFFFFFFFFFFFFFFFFFFFFFFFFFFFFFFFFFFFFFFFFFFFFFFFFFFFFFFFFFFFFFFFFFFF:FFFFF  
@A00155:342:HHGFNDSXY:1:1577:12952:26584 1:N:0:GAACCTAG+TCCGCATA  
CTCTATGCCGAGAGGGATGTGGAGGGCGAGAGAGAGCGACTTCTCTCGGGCCCACAGCCTTACAGCTG  
TGGAGCACGGTATCCTCTGCCGAAACAGAGGTTGGACAAGACCGGAGGGGTCTCCTAGTTCCAAAGGA  
+  
FFFFFFFFFFFFFFFFFFFFFFFFFFFFFFFFFFFFFFFFFFFFFFFFFFFFFFFFFFFFFFFFFFFFFFFFFFFFFFFF  
FFFFFFFFFFFFFFFFFFFFFFFFFFFFFFFFFFFFFFFFFFFFFFFFFFFFFFFFFFFFFFFFFFFFFFFFFFFFFFFF,FFF  
@A00155:342:HHGFNDSXY:1:1577:7835:30686 1:N:0:GAACCTAG+TCCGCATA  
TTAAGGACTCACCTCTGGCCTATGGTCATCTCAATGCCGAGAGGGATGTGGAGGGCGAGAGAGAGCGA  
CTTCTCTCGGGCCCACAGCCTTACAGCTGTGGAGCACGGTATCCTCTGCCGAAACAGAGGTTGGACAA  
+  
FFFFFFFFFFFFFFFFFFFFFFFFFFFFFFFFFFFFFFFFFFFFFFFFFFFFFFFFFFFFFFFFFFFFFFFFFFFFFFFF  
FFFFFFFFFFFFFFFFFFFFFFFFFFFFFFFFFFFFFFFFFFFFFFFFFFFFFFFFFFFFFFFFFFFFFFFFFFFFFFFF  
@A00155:342:HHGFNDSXY:1:1578:23845:10535 1:N:0:GAACCTAG+TCCGCATA  
CTTCTCTCGGGCCCACAGCCTTACAGCTGTGGAGCACGGTATCCTCTGCCGAAACAGAGGTTGGACAA  
GACCGGAGGGGTCTCCTAGTTCCAAAGGAGATGTACTCCGGGCTTGTTACACGACCTACCGTGTAAGTC  
+  
FFFFFFFFFFFFFFFFFFFFFFFFFFFFFFFFFFFFFFFFFFFFFFFFFFFFFFFFFFFFFFFFFFFFFFFFFFFFFFFF  
FFFFFFFFFFFFFFFFFFFFFFFFFFFFFFFFFFFFFFFFFFFFFFFFFFFFFFFFFFFFFFFFFFFFFFFFFFFFFFFF  
@A00155:342:HHGFNDSXY:1:1578:29405:11960 1:N:0:GAACCTAG+TCCGCATA  
CTTCTCTCGGGCCCACAGCCTTACAGCTGTGGAGCACGGTATCCTCTGCCGAAACAGAGGTTGGACAA  
GACCGGAGGGGTCTCCTAGTTCCAAAGGAGATGTACTCCGGGCTTGTTACACGACCTACCGTGTAAGTC  
+  
FFFFFFFFFFFFFFFFFFFFFFFFFFFFFFFFFFFFFFFFFFFFFFFFFFFFFFFFFFFFFFFFFFFFFFFFFFFFFFFF  
FFFFFFFFFFFFFFFFFFFFFFFFFFFFFFFFFFFFFFFFFFFFFFFFFFFFFFFFFFFFFFFFFFFFFFFFFFFFFFFF  
@A00155:342:HHGFNDSXY:1:1578:28167:13166 1:N:0:GAACCTAG+TCCGCATA  
ATCCTCTGCCGAAACAGAGGTTGGACAAGACCGGAGGGGTCTCCTGGTTCCAAAGGAGATGTACTCCG  
GGCTTGTTACACGACCTACCGTGTAAGTCGTAGTCTAGTAGGCTACCTGACGAGTCCTTTTAGGACGA  
+  
FFFFFFFFFFFFFFFFFFFFFFFFFFFFFFFFFFFFFFFFFFFFFFFFFFFFFFFFFFFFFFFFFFFFFFFFFFFFFFFF  
FFFFFFFFFFFFFFFFFFFFFFFFFFFFFFFFFFFFFFFFFFFFFFFFFFFFFFFFFFFFFFFFFFFFFFFFFFFFFFFF  
@A00155:342:HHGFNDSXY:1:1578:22426:27242 1:N:0:GAACCTAG+TCCGCATA  
GAGCGACTTCTCTCGGGCCCACAGCCTTACAGCTGTGGAGCACGGTATCCTCTGCCGAAACAGAGGTT  
GGACAAGACCGGAGGGGTCTCCTAGTTCCAAAGGAGATGTACTCCGGGCTTGTTACACGACCTACCGTG  
+  
FFFFFFFFFFFFFFFFFFFFFFFFFFFFFFFFFFFFFFFFFFFFFFFFFFFFFFFFFFFFFFFFFFFFFFFFFFFFFFFF  
FFFFF:FFFFFFFFFFFFFFFFFFFFFFFFFFFFFFFFFFFFFFFFFFFFFFFFFFFFFFFFFFFFFFFFFFFFFFFF  
@A00155:342:HHGFNDSXY:1:1601:13449:14293 1:N:0:GAACCTAG+TCCGCATA  
GGATGTGGAGGGCGAGAGAGAGCGACTTCTCTCGGGCCCACAGCCTTACAGCTGTGGAGCACGGTATC  
CTCTGCCGAAACAGAGGTTGGACAAGACCGGAGGGGTCTCCTAGTTCCAAAGGAGATGTACTCC  
+  
FFFFFFFFFFFF:FFFFFFFFFFFFFFFFFFFFFFFFFFFFFFFFFFFFFFFFFFFFFFFFFFFFFFFFFFFFFFFF  
FFFFFFFFFFFFFFFFFFFFFFFFFFFFFFFFFFFFFFFFFFFFFFFFFFFFFFFFFFFFFFFFFFFFFFFFFFFFFFFF  
@A00155:342:HHGFNDSXY:1:1601:9362:19492 1:N:0:GAACCTAG+TCCGCATA  
ATCTCAATGCCGAGAGGGATGTGGAGGGCGAGAGAGAGCGACTTCTCTCGGGCCCACAGCCTTACAGC

TGTGGAGCACGGTATCCTCTGCCGAAACAGAGGTTGGACAAGACCGGAGGGGTCTCCTAGTTCCAAAG  
+  
FFFFFFFFFFFFFFFFFFFFFFFFFFFFFFFFFFFFFFFFFFFFFFFFFFFFFFFFFFFFFFFFFFFFFFFF  
FFFFFFFFFFFFFFFFFFFFFFFFFFFFFFFFFFFFFFFFFFFFFFFFFFFFFFFFFFFFFFFFFFFFFFFF,FFFFFFFF  
@A00155:342:HHGFNDSXY:1:1601:11216:23766 1:N:0:GAACCTAG+TCCGCATA  
GGGCGAGAGAGAGCGACTTCTCTCGGGCCCACAGCCTTACAGCTGTGGAGCACGGTATCCTCTGCCGA  
AACAGAGGTTGGACAAGACCGGAGGGGTCTCCTGGTTCCAAAGGAGATGTACTCCGGGCTTGTTACG  
+  
FFFFFFFFFFFFFFFFFFFFFFFFFFFFFFFFFFFFFFFFFFFFFFFFFFFFFFFFFFFFFFFFFFFFFFFF  
FF:FFFFFFFFFFFFFFFFFFFFFFFFFFFFFFFFFFFFFFFFFFFFFFFFFFFFFFFFFFFFFFFFFFFF  
@A00155:342:HHGFNDSXY:1:1601:12373:25895 1:N:0:GAACCTAG+TCCGCATA  
TGCCGAGAGGGATGTGGAGGGCGAGAGAGAGCGACTTCTCTCGGGCCCACAGCCTTACAGCTGTGGAG  
CACGGTATCCTCTGCCGAAACAGAGGTTGGACAAGACCGGAGGGGTCTCCTAGTTCCAAAGGAGATGT  
+  
FFFFF:FFFFFFFFFFFFFFFFFFFFFFFFFFFFFFFFFFFFFFFFFFFFFFFFFFFFFFFFFFFFFFFF:F:  
FFFFF::FFFFFFFFFFFFFFFFFFFFFFFFFFFFFFFFFFFFFFFFFFFFFFFFFFFFFFFFFFFFFFFF:FFFFF  
@A00155:342:HHGFNDSXY:1:1601:16080:30655 1:N:0:GAACCTAG+TCCGCATA  
GAGGGCGAGAGAGAGCGACTTCTCTCGGGCCCACAGCCTTACAGCTGTGGAGCACGGTATCCTCTGCC  
GAAACAGAGGTTGGACAAGACCGGAGGGGTCTCCTGGTTCCAAAGGAGATGTACTCCGGGCTTGTTCA  
+  
FFFFFFFFFFFFFFFFFFFFFFFFFFFFFFFFFFFFFFFFFFFFFFFFFFFFFFFFFFFFFFFFFFFFFFFF  
F:FFFFFFFFFFFFFFFFFFFFFFFFFFFFFFFFFFFFFFFFFFFFFFFFFFFFFFFFFFFFFFFFFFFFFFFF  
@A00155:342:HHGFNDSXY:1:1601:14570:31704 1:N:0:GAACCTAG+TCCGCATA  
GAGGGCGAGAGAGAGCGACTTCTCTCGGGCCCACAGCCTTACAGCTGTGGAGCACGGTATCCTCTGCC  
GAAACAGAGGTTGGACAAGACCGGAGGGGTCTCCTGGTTCCAAAGGAGATGTACTCCGGGCTTGTTCA  
+  
,FFFFF,FFFFFFFFF,F:FFF:FFFF:FFFFFFFF::FFFFFFFFF,FFFF:F:F:F:FF,FFFF,:  
FFFF:FFF,FFFF,FFFF,FFFF:FF,:FFFFFFFFFFFFFFFFFFFFFFFFFFFFFFFF:FF,FFF:FF:FFF  
@A00155:342:HHGFNDSXY:1:1602:6153:15060 1:N:0:GAACCTAG+TCCGCATA  
CTTCTCTCGGGCCCACAGCCTTACAGCTGTGGAGCACGGTATCCTCTGCCGAAACAGAGGTTGGACAA  
GACCGGAGGGGTCTCCTAGTTCCAAAGGAGATGTACTCCGGGCTTGTTACGACCTACCGTGTAAGTC  
+  
FFFFFFFFFFFFFFFFFFFFF:FFFFFFFFFFFFFFFFFFFFFFFFFFFFFFFFFFFFFFFFFFFFFFFF,FFFFFFFFFFFFFFFFFFFFF  
FFF:FFFFFFFFFFFFFFFFFFFFFFFFFFFFFFFFFFFFFFFFFFFFFFFFFFFFFFFFFFFFFFFFFFFF,FFF  
@A00155:342:HHGFNDSXY:1:1603:10999:3881 1:N:0:GAACCTAG+TCCGCATA  
AGGGCGAGAGAGAGCGACTTCTCTCGGGCCCACAGCCTTACAGCTGTGGAGCACGGTATCCTCTGCCG  
AAACAGAGGTTGGACAAGACCGGAGGGGTCTCCTAGTTCCAAAGGAGATGTACTCCGGGCTTGTTAC  
+  
FFFF:FFFFFFFFFFFFFFFFFFFFF:FFFFFFFFFFFFFFFFFFFFFFFFFFFFFFFFFFFFFFFFFFFFF  
FFFFFFFFFFFFFFFFFFFFF:FFFFFFFFFFFFFFFFFFFFF:FFFFFFFFFFFF:FFFFFFFFF:FFFFFFFF  
@A00155:342:HHGFNDSXY:1:1603:1253:24987 1:N:0:GAACCTAG+TCCGCATA  
ATCTCAATGCCGAGAGGGATGTGGAGGGCGAGAGAGAGCGACTTCTCTCGGGCCCACAGCCTTACAGC  
TGTGGAGCACGGTATCCTCTGCCGAAACAGAGGTTGGACAAGACCGGAGGGGTCTCCTAGTTCCAAAG  
+  
FFFFFFFFFFFFFFFFFFFFF:FFFF:FFFFFFFFFFFFFFFFFFFFFFFFFFFFFFFFFFFFFFFFFFFFF  
FF:FFFFFFFFFFFFFFFFFFFFF:FFFFFFFFFFFFFFFFF,FFFFFFFFFFFFFFFFFFFF:FF,FFFF:FF  
@A00155:342:HHGFNDSXY:1:1604:25843:6668 1:N:0:GAACCTAG+TCCGCATA  
GACTTCTCTCGGGCCCACAGCCTTACAGCTGTGGAGCACGGTATCCTCTGCCGAAACAGAGGTTGGAC  
AAGACCGGAGGGGTCTCCTAGTTCCAAAGGAGATGTACTCCGGGCTTGTTACGACCTACCGTGTAAG  
+  
FFFFF:FFFFFFFFFFFFFFFFFFFFF:FFFFFFFFFFFFFFFFFFFFFFFFFFFFFFFFFFFFFFFFFFFFF  
FFFFFFFFFFFFF:FFFFFFFFFFFFFFFFFFFFF:FFFFFFFFF:FFFFFFFFFFFFFFFFFFFFF  
@A00155:342:HHGFNDSXY:1:1604:26241:18129 1:N:0:GAACCTAG+TCCGCATA  
CGACTTCTCTCGGGCCCACAGCCTTACAGCTGTGGAGCACGGTATCCTCTGCCGAAACAGAGGTTGGA

CAAGACCGGAGGGGTCTCCTAGTTCCAAAGGAGATGTACTCCGGGCTTGTTACAGACCTACCGTGTA  
+  
FFFFFFFFFFFFFFFFFFFFFFFFFFFFFFFFFFFFFFFFFFFFFFFFFFFFFFFFFFFFFFFFFFFFFFFF  
FFF::FF,FFFFFFFFFFFFFFFFFFFFFFFFFFFFFFFFFFFFFFFFFFFFFFFFFFFFFFFFFFFFFFFF  
@A00155:342:HHGFNDSXY:1:1605:15944:18239 1:N:0:GAACCTAG+TCCGCATA  
TGCCGAGAGGGATGTGGAGGGCGAGAGAGAGCGACTTCTCTCGGGCCACAGCCTTACAGCTGTGGAG  
CACGGTATCCTCTGCCGAAACAGAGGTTGGACAAGACCGGAGGGGTCTCCTGGTTCCAAAGGAGATGT  
+  
FFFFFFFFFFFFFFFFFFFFFFFFFFFFFFFFFFFFFFFFFFFFFFFFFFFFFFFFFFFFFFFFFFFFFFFF  
FFFFFFFFFFFFFFFFFFFFFFFFFFFFFFFFFFFFFFFFFFFFFFFFFFFFFFFFFFFFFFFFFFFFFFFF  
@A00155:342:HHGFNDSXY:1:1606:25319:2691 1:N:0:GAACCTAG+TCCGCATA  
CTTCTCTCGGGCCACAGCCTTACAGCTGTGGAGCACGGTATCCTCTGCCGAAACAGAGGTTGGACAA  
GACCGGAGGGGTCTCCTAGTTCCAAAGGAGATGTACTCCGGGCTTGTTACAGACCTACCGTGTAAGTC  
+  
FFFFFFFFFFFFFFFFFFFFFFFFFFFFFFFFFFFFFFFFFFFFFFFFFFFFFFFFFFFFFFFFFFFFFFFF  
FFFFFFFFFFFFFFFFFFFFFFFFFFFFFFFFFFFFFFFFFFFFFFFFFFFFFFFFFFFFFFFFFFFFFFFF  
@A00155:342:HHGFNDSXY:1:1606:24596:8046 1:N:0:GAACCTAG+TCCGCATA  
CTTCTCTCGGGCCACAGCCTTACAGCTGTGGAGCACGGTATCCTCTGCCGAAACAGAGGTTGGACAA  
GACCGGAGGGGTCTCCTAGTTCCAAAGGAGATGTACTCCGGGCTTGTTACAGACCTACCGTGTAAGTC  
+  
FFFFFFFFFFFFFFFFFFFFFFFFFFFFFFFFFFFFFFFFFFFFFFFFFFFFFFFFFFFFFFFFFFFFFFFF  
FFFFFFFFFFFFFFFFFFFFFFFFFFFFFFFFFFFFFFFFFFFFFFFFFFFFFFFFFFFFFFFFFFFFFFFF  
@A00155:342:HHGFNDSXY:1:1606:30418:11772 1:N:0:GAACCTAG+TCCGCATA  
CAATGCCGAGAGGGATGTAGAGGGCGAGAGAGAGCGACTTCTCTCGGGCCACAGCCTTACAGCTGTG  
GAGCACGGTATCCTCTGCCGAAACAGAGGTTGGACAAGACCGGAGGGGTCTCCTAGTTCCAAAGGAGA  
+  
FFFFFFFFFFFFFFFFFFFFFFFFFFFFFFFFFFFFFFFFFFFFFFFFFFFFFFFFFFFFFFFFFFFFFFFF  
FFFFFFFFFFFFFFFFFFFFFFFFFFFFFFFFFFFFFFFFFFFFFFFFFFFFFFFFFFFFFFFFFFFFFFFF  
@A00155:342:HHGFNDSXY:1:1606:15591:24486 1:N:0:GAACCTAG+TCCGCATA  
TGGTCATCTCAATGCCGAGAGGGATGTGGAGGGCGAGAGAGAGCGACTTCTCTCGGGCCACAGCCTT  
ACAGCTGTGGAGCACGGTATCCTCTGCCGAAACAGAGGTTGGACAAGACCGGAGGGGTCTCCTAGTTC  
+  
FFFFFFFFFFFFFFFFFFFFFFFFFFFFFFFFFFFFFFFFFFFFFFFFFFFFFFFFFFFFFFFFFFFFFFFF  
FFFFFFFFFFFFFFFFFFFFFFFFFFFFFFFFFFFFFFFFFFFFFFFFFFFFFFFFFFFFFFFFFFFFFFFF  
@A00155:342:HHGFNDSXY:1:1607:20175:13510 1:N:0:GAACCTAG+TCCGCATA  
GTATCCTCTGCCGAAACAGAGGTTGGACAAGACCGGAGGGGTCTCCTAGTTCCAAAGGAGATGTACTC  
CGGGCTTGTTACAGACCTACCGTGTAAGTCGTAGTCTAGTAGGCTACCTGACGAGTCCTTTTAGGAC  
+  
FFFFFFFFFFFFFFFFFFFFFFFFFFFFFFFFFFFFFFFFFFFFFFFFFFFFFFFFFFFFFFFFFFFFFFFF  
FFFFFFFFFFFFFFFFFFFFFFFFFFFFFFFFFFFFFFFFFFFFFFFFFFFFFFFFFFFFFFFFFFFFFFFF  
@A00155:342:HHGFNDSXY:1:1607:13123:23124 1:N:0:GAACCTAG+TCCGCATA  
AGCGACTTCTCTCGGGCCACAGCCTTACAGCTGTGGAGCACGGTATCCTCTGCCGAAACAGAGGTTG  
GACAAGACCGGAGGGGTCTCCTAGTTCCAAAGGAGATGTACTCCGGACTTGTTACAGACCTACCGTGT  
+  
FFFFFFFFFFFFFFFFFFFFFFFFFFFFFFFFFFFFFFFFFFFFFFFFFFFFFFFFFFFFFFFFFFFFFFFF  
FFFF:FFFFFFFFFFFFFFFFFFFFFFFFFFFFFFFFFFFFFFFFFFFFFFFFFFFFFFFFFFFFFFFF:F:FFFF  
@A00155:342:HHGFNDSXY:1:1607:23411:27508 1:N:0:GAACCTAG+TCCGCATA  
TAGTCTAGTAGGCTACCTGACGAGTCCTTTTAGGACGAACTTACACAACCTCGAAGAGTAACGACGG  
TTTCGTCCTTGGAACGGACTIONCATCAGGGAGCCTACTAGACTCCAACCGTCATGGGGGTTCAAACCCAT  
+  
FFFFFFFFFFFFFFFFFFFFFFFFFFFFFFFFFFFFFFFFFFFFFFFFFFFFFFFFFFFFFFFFFFFFFFFF  
FFFF,FFFFFFFFFFFFFFFFFFFFFFFFFFFFFFFFFFFFFFFFFFFFFFFFFFFFFFFFFFFFFFFFFFFF  
@A00155:342:HHGFNDSXY:1:1607:21124:36793 1:N:0:GAACCTAG+TCCGCATA  
AGACTCACCTCTGGCCTATGGTCATCTCAATGCCGAGAGGGATGTGGAGGGCGAGAGAGAGCGACTTC

TCTCGGGCCACAGCCTTACAGCTGTGGAGCACGGTATCCTCTGCCGAAACAGAGGTTGGACAAGACC  
+  
FFFFFFFFFFFFFFFFFFFFFFFFFFFFFFFFFFFFFFFFFFFFFFFFFFFFFFFFFFFFFFFFFFFFFFFF  
FFFFFFFFFFFFFFFFFFFFFFFFFFFFFFFFFFFFFFFFFFFFFFFFFFFFFFFFFFFFFFFFFFFFFFFF:FF  
@A00155:342:HHGFNDSXY:1:1608:17716:5400 1:N:0:GAACCTAG+TCCGCATA  
GGATGTGGAGGGCGAGAGAGAGCGACTTCTCTCGGGCCACAGCCTTACAGCTGTGGAGCACGGTATC  
CTCTGCCGAAACAGAGGTTGGACAAGACCGAGGGGTCTCCTAGTTCAAAGGAGATGTACTCC  
+  
FFFFFFFFFFFFFFFFFFFFFFFFFFFFFFFFFFFFFFFFFFFFFFFFFFFFFFFFFFFFFFFFFFFFFFFF:FFFFFFFFFFFFFFFF  
FFFFFFFFFFFFFFFFFFFFFFFFFFFFFFFFFFFFFFFFFFFFFFFFFFFFFFFFFFFFFFFFFFFFFFFF:FFFF  
@A00155:342:HHGFNDSXY:1:1608:14326:7858 1:N:0:GAACCTAG+TCCGCATA  
ACCTCTGTTTCGGCAGAGGATACCGTGCTCCACAGCTGTAAGGCTGTGGGCCCCGAGAGAAGTCGCTCT  
CTCTCGCCCTCCACATCCCTCTCGGCATTGAGATGACCATAGGCCAGAGGAGAGTCCTTAAGTGGACA  
+  
FFFFFFFFFFFFFFFFFFFFFFFFFFFFFFFFFFFFFFFFFFFFFFFFFFFFFFFFFFFFFFFFFFFFFFFF  
FFFFFFFFFFFFFFFFFFFFFFFFFFFFFFFFFFFFFFFFFFFFFFFFFFFFFFFFFFFFFFFFFFFFFFFF  
@A00155:342:HHGFNDSXY:1:1608:25364:11537 1:N:0:GAACCTAG+TCCGCATA  
ACTTCTCTCGGGCCACAGCCTTACAGCTGTGGAGCACGGTATCCTCTGCCGAAACAGAGGTTGGACA  
AGACCGGAGGGGTCTCCTAGTTCAAAGGAGATGTACTCCGGGCTTGTTACGACCTACCGTGTAAG  
+  
FFFFFFFF,FFFFFFFF,FFFFF,:FFFFFFFFFFFFFFFF,F:FFFFFFFF:FFFF,F  
F,FFFFFFFFFFFFFFFF:FFFFFFFFFFFFFFFF:FFFF,FFFFFFFF:FFFF,FFF:FFFF  
@A00155:342:HHGFNDSXY:1:1608:21169:15953 1:N:0:GAACCTAG+TCCGCATA  
CTTCTCTCGGGCCACAGCCTTACAGCTGTGGAGCACGGTATCCTCTGCCGAAACAGAGGTTGGACAA  
GACCGGAGGGGTCTCCTGGTTCAAAGGAGATGTACTCCGGGCTTGTTACGACCTACCGTGTAAGTC  
+  
FFFFFFFFFFFFFFFFFFFFFFFFFFFFFFFFFFFFFFFFFFFFFFFFFFFFFFFFFFFFFFFFFFFFFFFF  
FFFFFFFFFFFFFFFFFFFFFFFFFFFFFFFFFFFFFFFFFFFFFFFFFFFFFFFFFFFFFFFFFFFFFFFF:FFFFFFFFFFFF  
@A00155:342:HHGFNDSXY:1:1608:32217:27383 1:N:0:GAACCTAG+TCCGCATA  
TGCTCCACAGCTGTAAGGCTGTGGGCCCCGAGAGAAGTCGCTCTCTCTCGCCCTCCACATCCCTCTCGG  
CATTGAGATGACCATAGGCCAGAGGTGAGTCCTTAAGTGGACACAGCTGATCTAAGGCGGTGTGGTG  
+  
FFFFFFFFFFFFFFFFFFFFFFFFFFFFFFFFFFFFFFFFFFFFFFFFFFFFFFFFFFFFFFFFFFFFFFFF  
FFFFF:FFFFFFFFFFFFFFFF:FFFFFFFFFFFFFFFF:FFFFFFFFFFFFFFFF:F:FFFFF  
@A00155:342:HHGFNDSXY:1:1608:3540:28166 1:N:0:GAACCTAG+TCCGCATA  
GGATGTGGAGGGCGAGAGAGAGCGACTTCTCTCGGGCCACAGCCTTACAGCTGTGGAGCACGGTATC  
CTCTGCCGAAACAGAGGTTGGACAAGACCGAGGGGTCTCCTAGTTCAAAGGAGATGTACTCC  
+  
FFFFF:FFFFFFFFFFFFFFFF:FFFFFFFFFFFFFFFF:FFFFFFFF,FFFFFFFFFFFFFFFF:FFFFF  
FFFFFFFFFFFFFFFFFFFFFFFFFFFFFFFFFFFFFFFFFFFFFFFFFFFFFFFFFFFFFFFFFFFFFFFF  
@A00155:342:HHGFNDSXY:1:1608:27154:32518 1:N:0:GAACCTAG+TCCGCATA  
GGCGAGAGAGAGCGACTTCTCTCGGGCCACAGCCTTACAGCTGTGGAGCACGGTATCCTCTGCCGAA  
ACAGAGGTTGGACAAGACCGGAGGGGTCTCCTAGTTCAAAGGAGATGTACTCCGGGCTTGTTACGA  
+  
FFFFFFFFFFFFFFFFFFFFFFFF,FFFFFFFFFFFFFFFFFFFFFFFF:FFFFFFFFFFFFFFFFFFFFFFFF  
FFFFFFFFFFFFFFFFFFFFFFFFFFFFFFFFFFFFFFFFFFFFFFFFFFFFFFFFFFFFFFFFFFFFFFFF  
@A00155:342:HHGFNDSXY:1:1608:23231:35994 1:N:0:GAACCTAG+TCCGCATA  
GACTTCTCTCGGGCCACAGCCTTACAGCTGTGGAGCACGGTATCCTCTGCCGAAACAGAGGTTGGAC  
AAGACCGGAGGGGTCTCCTGGTTCAAAGGAGATGTACTCCGGGCTTGTTACGACCTACCGTGTAAG  
+  
F:FFFFFFFFFFFFFFFFFFFFFFFF:FFFFFFFFFFFFFFFFFFFFFFFFFFFFFFFFFFFFFFFFFFFF  
FFFFFFFFFFFFFFFFFFFFFFFFFFFFFFFFFFFFFFFF:FFFFFFFFFFFFFFFFFFFFFFFF  
@A00155:342:HHGFNDSXY:1:1609:19443:2973 1:N:0:GAACCTAG+TCCGCATA  
TCAATGCCGAGAGGGATGTAGAGGGCGAGAGAGAGCGACTTCTCTCGGGCCACAGCCTTACAGCTGT

GGAGCACGGTATCCTCTGCCGAAACAGAGGTTGGACAAGACCGGAGGGGTCTCCTAGTTCCAAAGGAG  
+  
FFFFFFFFFFFFFFFF:FFFFFFFFFFFFFFFFFFFFFFFFFFFFFFFFFFFFFFFFFFFFFFFF  
F:FFFFFFFFFFFFFFFFFFFFFFFFFFFFFFFFFFFFFFFFFFFFFFFFFFFFFFFFFFFFFFFF  
@A00155:342:HHGFNDSXY:1:1609:13105:23249 1:N:0:GAACCTAG+TCCGCATA  
CTTCTCTCGGGCCCACAGCCTTACAGCTGTGGAGCACGGTATCCTCTGCCGAAACAGAGGTTGGACAA  
GACCGGAGGGGTCTCCTAGTTCCAAAGGAGATGTACTCCGGGCTTGTTACGACCTACCGTGTAAGTC  
+  
FFFFFFFFFFFFFFFFFFFFFFFF:FFFFFFFFFFFFFFFFFFFFFFFFFFFFFFFFFFFFFFFF  
FFFFFFFFFFFFFFFFFFFFFFFFFFFFFFFFFFFFFFFFFFFFFFFFFFFFFFFFFFFFFFFF  
@A00155:342:HHGFNDSXY:1:1609:26910:29121 1:N:0:GAACCTAG+TCCGCATA  
GTCATCTCAATGCCGAGAGGGATGTGGAGGGCGAGAGAGAGCGACTTCTCTCGGGCCCACAGCCTTAC  
AGCTGTGGAGCACGGTATCCTCTGCCGAAACAGAGGTTGGACAAGACCGGAGGGGTCTCCTAGTTCCA  
+  
FFFFFFFFFFFFFFFFFFFFFFFFFFFFFFFFFFFFFFFFFFFFFFFFFFFFFFFFFFFFFFFF  
FFFFFFFFFFFFFFFFFFFFFFFFFFFFFFFFFFFFFFFFFFFFFFFFFFFFFFFFFFFFFFFF:FFFFF  
@A00155:342:HHGFNDSXY:1:1609:26313:33411 1:N:0:GAACCTAG+TCCGCATA  
ACTTCTCTCGGGCCCACAGCCTTACAGCTGTGGAGCACGGTATCCTCTGCCGAAACAGAGGTTGGACA  
AGACCGGAGGGGTCTCCTGTTCCAAAGGAGATGTACTCCGGGCTTGTTACGACCTACCGTGTAAGT  
+  
FFFFFFFFFFFFFFFFFFFFFFFFFFFFFFFFFFFFFFFFFFFFFFFFFFFFFFFFFFFFFFFF  
FFFFFFFFFFFFFFFFFFFFFFFFFFFFFFFFFFFFFFFFFFFFFFFFFFFFFFFFFFFFFFFF  
@A00155:342:HHGFNDSXY:1:1609:27326:34162 1:N:0:GAACCTAG+TCCGCATA  
GTCATCTCAATGCCGAGAGGGATGTGGAGGGCGAGAGAGAGCGACTTCTCTCGGGCCCACAGCCTTAC  
AGCTGTGGAGCACGGTATCCTCTGCCGAAACAGAGGTTGGACAAGACCGGAGGGGTCTCCTAGTTCCA  
+  
FFFFFFFFFFFFFFFFFFFFFFFFFFFFFFFFFFFFFFFFFFFFFFFFFFFFFFFFFFFFFFFF  
FFFFFFFFFFFFFFFFFFFFFFFFFFFFFFFFFFFFFFFFFFFFFFFFFFFFFFFFFFFFFFFF  
@A00155:342:HHGFNDSXY:1:1609:27263:34240 1:N:0:GAACCTAG+TCCGCATA  
GTCATCTCAATGCCGAGAGGGATGTGGAGGGCGAGAGAGAGCGACTTCTCTCGGGCCCACAGCCTTAC  
AGCTGTGGAGCACGGTATCCTCTGCCGAAACAGAGGTTGGACAAGACCGGAGGGGTCTCCTAGTTCCA  
+  
FFFFFFFFFFFFFFFFFFFFFFFFFFFFFFFFFFFFFFFFFFFFFFFFFFFFFFFFFFFFFFFF  
FFFFFFFFFFFFFFFFFFFFFFFFFFFFFFFFFFFFFFFFFFFFFFFFFFFFFFFFFFFFFFFF  
@A00155:342:HHGFNDSXY:1:1609:12897:36260 1:N:0:GAACCTAG+TCCGCATA  
TGTCCACTTAAGGACTCACCTCTGGCCTATGGTCATCTCAATGCCGAGAGGGATGTGGAGGGCGAGAG  
AGAGCGACTTCTCTCGGGCCCACAGCCTTACAGCTGTGGAGCACGGTATCCTCTGCCGAAACAGAGGT  
+  
FFFFFFFFFFFFFFFFFFFFFFFFFFFFFFFFFFFFFFFFFFFFFFFFFFFFFFFFFFFFFFFF  
FFFFFFFFFFFFFFFFFFFFFFFFFFFFFFFFFFFFFFFFFFFFFFFFFFFFFFFFFFFFFFFF  
@A00155:342:HHGFNDSXY:1:1609:12807:36385 1:N:0:GAACCTAG+TCCGCATA  
TGTCCACTTAAGGACTCACCTCTGGCCTATGGTCATCTCAATGCCGAGAGGGATGTGGAGGGCGAGAG  
AGAGCGACTTCTCTCGGGCCCACAGCCTTACAGCTGTGGAGCACGGTATCCTCTGCCGAAACAGAGGT  
+  
FFFFFFFFFFFFFFF:FFFFFFFFFFFFFFFFFFFFFFFFFFFFFFFFFFFFFFFFFFFFFFFF  
FFFFFFFFF:FFFFFFFFFFFFFFFFFFFFFFFFFFFFFFFFFFFFFFFFFFFFFFFFFFFFFFFF  
@A00155:342:HHGFNDSXY:1:1610:26657:6261 1:N:0:GAACCTAG+TCCGCATA  
GAGAGGGATGTAGAGGGCGAGAGAGAGCGACTTCTCTCGGGCCCACAGCCTTACAGCTGTGGAGCACG  
GTATCCTCTGCCGAAACAGAGGTTGGACAAGACCGGAGGGGTCTCCTAGTTCCAAAGGAGATGTACTC  
+  
FFFFFFFFFFFFFFFFFFFFFFFFFFFFFFFFFFFFFFFFFFFFFFFFFFFFFFFFFFFFFFFF  
FFFFFFFFFFFFFFFFFFFFFFFFFFFFFFFFFFFFFFFFFFFFFFFFFFFFFFFFFFFFFFFF  
@A00155:342:HHGFNDSXY:1:1610:14380:35070 1:N:0:GAACCTAG+TCCGCATA  
ATCTCAATGCCGAGAGGGATGTAGAGGGCGAGAGAGAGCGACTTCTCTCGGGCCCACAGCCTTACAGC

TGTGGAGCACGGTATCCTCTGCCGAAACAGAGGTTGGACAAGACCGGAGGGGTCTCCTAGTTCCAAAG  
 +  
 FFFFFFFFFFFFFFFFFFFFFFFFFFFFFFFFFFFFFFFFFFFFFFFFFFFFFFFFFFFFFFFFFFFFFFFFFF,:FFFF  
 FFFFFFFFFFFFFFFFFFFFFFFFFFFFFFFFFFFFFFFFFFFFFFFFFFFFFFFFFFFFFFFFFFFFFFFFFF  
 @A00155:342:HHGFNDSXY:1:1610:32461:35947 1:N:0:GAACCTAG+TCCGCATA  
 GTCATCTCAATGCCGAGAGGGATGTGGAGGGCGAGAGAGAGCGACTTCTCTCGGGCCCACAGCCTTAC  
 AGCTGTGGAGCACGGTATCCTCTGCCGAAACAGAGGTTGGACAAGACCGGAGGGGTCTCCTAGTTCCA  
 +  
 FFFFFFFFFFFFFFFFFFFFFFFFFFFFFFFFFFFFFFFFFFFFFFFFFFFFFFFFFFFFFFFFFFFFFFFFFF  
 FFFFFFFFFFFFFFFFFFFFFFFFFFFFFFFFFFFFFFFFFFFFFFFFFFFFFFFFFFFFFFFFFFFFFFFFFF  
 @A00155:342:HHGFNDSXY:1:1611:15727:10504 1:N:0:GAACCTAG+TCCGCATA  
 CTCAATGCCGAGAGGGATGTGGAGGGCGAGAGAGAGCGACTTCTCTCGGGCCCACAGCCTTACAGCTG  
 TGGAGCACGGTATCCTCTGCCGAAACAGAGGTTGGACAAGACCGGAGGGGTCTCCTAGTTCCAAAGGA  
 +  
 FFFFFFFFFFFFFFFFFFFFFFFFFFFFFFFFFFFFFFFFFFFFFFFFFFFFFFFFFFFFFFFFFFFFFFFFFF  
 FFFFFFFFFFFFFFFFFFFFFFFFFFFFFFFFFFFFFFFFFFFFFFFFFFFFFFFFFFFFFFFFFFFFFFFFFF  
 @A00155:342:HHGFNDSXY:1:1611:12418:12383 1:N:0:GAACCTAG+TCCGCATA  
 ACTTCTCTCGGGCCCACAGCCTTACAGCTGTGGAGCACGGTATCCTCTGCCGAAACAGAGGTTGGACA  
 AGACCGGAGGGGTCTCCTGTTCCAAAGGAGATGTACTCCGGGCTTGTTACGACCTACCGTGTAAGT  
 +  
 FFFFFFFFFFFFFFFFFFFFFFFFFFFFFFFFFFFFFFFFFFFFFFFFFFFFFFFFFFFFFFFFFFFFFFFFFF  
 FFFFFFFFFFFFFFFFFFFFFFFFFFFFFFFFFFFFFFFFFFFFFFFFFFFFFFFFFFFFFFFFFFFFFFFFFF  
 @A00155:342:HHGFNDSXY:1:1611:7401:31125 1:N:0:GAACCTAG+TCCGCATA  
 GAGGGCGAGAGAGAGCGACTTCTCTCGGGCCCACAGCCTTACAGCTGTGGAGCACGGTATCCTCTGCC  
 GAAACAGAGGTTGGACAAGACCGGAGGGGTCTCCTAGTTCCAAAGGAGATGTACTCCGGGCTTGTTCA  
 +  
 :FFFFFFFFFFFFFFFFFFFFFFFFFFFFFFFFFFFFFFFFFFFFFFFFFFFFFFFFFFFFFFFFFFFFFFFFF  
 FFFFFFFFFFFFFFFFFFFFFFFFFFFFFFFFFFFFFFFFFFFFFFFFFFFFFFFFFFFFFFFFFFFFFFFFFF  
 @A00155:342:HHGFNDSXY:1:1611:14742:34225 1:N:0:GAACCTAG+TCCGCATA  
 ATGCCGAGAGGGATGTAGAGGGCGAGAGAGAGCGACTTCTCTCGGGCCCACAGCCTTACAGCTGTGGA  
 GCACGGTATCCTCTGCCGAAACAGAGGTTGGACAAGACCGGAGGGGTCTCCTAGTTCCAAAGGAGATG  
 +  
 FFFFFFFFFFFFFFFFFFFFFFFFFFFFFFFFFFFFFFFFFFFFFFFFFFFFFFFFFFFFFFFFFFFFFFFFFF,FFFFFFFF  
 FFFFFFFFFFFFFFFFFFFFFFFFFFFFFFFFFFFFFFFFFFFFFFFFFFFFFFFFFFFFFFFFFFFFFFFFFF  
 @A00155:342:HHGFNDSXY:1:1612:22290:6872 1:N:0:GAACCTAG+TCCGCATA  
 AGAGAGCGACTTCTCTCGGGCCCACAGCCTTACAGCTGTGGAGCACGGTATCCTCTGCCGAAACAGAG  
 GTTGGACAAGACCGGAGGGGTCTCCTAGTTCCAAAGGAGATGTACTCCGGGCTTGTTACGACCTACC  
 +  
 FFFFFFFFFFFFFFFFFFFFFFFFFFFFFFFFFFFFFFFFFFFFFFFFFFFFFFFFFFFFFFFFFFFFFFFFFF  
 FFFFFFFFFFFFFFFFFFFFFFFFFFFFFFFFFFFFFFFFFFFFFFFFFFFFFFFFFFFFFFFFFFFFFFFFFF  
 @A00155:342:HHGFNDSXY:1:1612:29387:34663 1:N:0:GAACCTAG+TCCGCATA  
 AGAGGGATGTGGAGGGCGAGAGAGAGCGACTTCTCTCGGGCCCACAGCCTTACAGCTGTGGAGCACGG  
 TATCCTCTGCCGAAACAGAGGTTGGACAAGACCGGAGGGGTCTCCTAGTTCCAAAGGAGATGTACTCC  
 +  
 FFFFFFFFFFFFFFFFFFFFFFFFFFFFFFFFFFFFFFFFFFFFFFFFFFFFFFFFFFFFFFFFFFFFFFFFFF  
 FFFFFFFFFFFFFFFFFFFFFFFFFFFFFFFFFFFFFFFFFFFFFFFFFFFFFFFFFFFFFFFFFFFFFFFFFF  
 @A00155:342:HHGFNDSXY:1:1612:22064:35227 1:N:0:GAACCTAG+TCCGCATA  
 ACTTCTCTCGGGCCCACAGCCTTACAGCTGTGGAGCACGGTATCCTCTGCCGAAACAGAGGTTGGACA  
 AGACCGGAGGGGTCTCCTAGTTCCAAAGGAGATGTACTCCGGGCTTGTTACGACCTACCGTGTAAG  
 +  
 FFFFFFFFFFFFFFFFFFFFFFFFFFFFFFFFFFFFFFFFFFFFFFFFFFFFFFFFFFFFFFFFFFFFFFFFFF  
 FFFFFFFFFFFFFFFFFFFFFFFFFFFFFFFFFFFFFFFFFFFFFFFFFFFFFFFFFFFFFFFFFFFFFFFFFF  
 @A00155:342:HHGFNDSXY:1:1612:15022:36652 1:N:0:GAACCTAG+TCCGCATA  
 ATCTCAATGCCGAGAGGGATGTGGAGGGCGAGAGAGAGCGACTTCTCTCGGGCCCACAGCCTTACAGC



TGTGGAGCACGGTATCCTCTGCCGAAACAGAGGTTGGACAAGACCGGAGGGGTCTCCTAGTTCCAAAG  
 +  
 FFFFFFFFFFFFFFFFFFFFFFFFFFFFFFFFFFFFFFFFFFFFFFFFFFFFFFFFFFFFFFFFFFFFFFFFFF,FFFFFFF  
 FFFFFFFFFFFFFFFFFFFFFFFFFFFFFFFFFFFFFFFFFFFFFFFFFFFFFFFFFFFFFFFFFFFFFFFFFF  
 @A00155:342:HHGFNDSXY:1:1612:17888:36918 1:N:0:GAACCTAG+TCCGCATA  
 ACTTCTCTCGGGCCACAGCCTTACAGCTGTGGAGCACGGTATCCTCTGCCGAAACAGAGGTTGGACA  
 AGACCGGAGGGGTCTCCTAGTTCCAAAGGAGATGTACTCCGGGCTTGTTACGACCTACCGTGTAAG  
 +  
 FFFFFFFFFFFFFFFFFFFFFFFFFF,F:FFFF:FFFFFFFFFFFFFFFFFFFFFFFFFFFFFFFFFFFFFFFF  
 FFFFFFFFFFFFFFFFFFFFFF:FFFFFFFFFFFFFFFFFFFFFFFFFFFFFFFFFFFFFFFFFFFFFFFFFFFF  
 @A00155:342:HHGFNDSXY:1:1613:24334:21277 1:N:0:GAACCTAG+TCCGCATA  
 GAGGGCGAGAGAGAGCGACTTCTCTCGGGCCACAGCCTTACAGCTGTGGAGCACGGTATCCTCTGCC  
 GAAACAGAGGTTGGACAAGACCGGAGGGGTCTCCTAGTTCCAAAGGAGATGTACTCCGGGCTTGTTCA  
 +  
 FFFFFFFFFFFFFFFFFFFFFFFFFFFFFFFFFFFFFFFFFFFFFFFFFFFFFFFFFFFFFFFFFFFFFFFFFF  
 FFFFFFFFFFFFFFFFFFFFFFFFFFFFFFFFFFFFFFFFFFFFFFFFFFFFFFFFFFFFFFFFFFFFFFFFFF  
 @A00155:342:HHGFNDSXY:1:1613:5963:23750 1:N:0:GAACCTAG+TCCGCATA  
 GTATCCTCTGCCGAAACAGAGGTTGGACAAGACCGGAGGGGTCTCCTAGTTCCAAAGGAGATGTACTC  
 CGGGCTTGTTACGACCTACCGTGTAAGTCGTAGTCTAGTAGGCTACCTGAAGAGTCCTTTTTAGGAC  
 +  
 FFFFFFFFFFFFFFFFFFFFFFFFFFFFFFFFFFFFFFFFFFFFFFFFFFFFFFFFFFFFFFFFFFFFFFFFFF  
 FFFFFFFFFFFFFFFFFFFFFFFFFFFFFFFFFFFFFF:FFFFFFFFFFFFFFFFFFFFF:FFFFFFFFFFFFFFFFFFFFF:FFF  
 @A00155:342:HHGFNDSXY:1:1613:10013:24251 1:N:0:GAACCTAG+TCCGCATA  
 ATCTCAATGCCGAGAGGGATGTAGAGGGCGAGAGAGAGCGACTTCTCTCGGGCCACAGCCTTACAGC  
 TGTGGAGCACGGTATCCTCTGCCGAAACAGAGGTTGGACAAGACCGGAGGGGTCTCCTAGTTCCAAAG  
 +  
 FFFFFFFFFFFFFFFFFFFFFFFFFFFFFFFFFFFFFFFFFFFFFFFFFFFFFFFFFFFFFFFFFFFFFFFFFF  
 FFFFFFFFFFFFFF:FFFFFFFFFFFFFFFFFFFFFFFFFFFFFFFFFFFFFFFFFFFFFFFFFFFFFFFFFFFF,FFFFFFF  
 @A00155:342:HHGFNDSXY:1:1613:12988:29246 1:N:0:GAACCTAG+TCCGCATA  
 GCGACTTCTCTCGGGCCACAGCCTTACAGCTGTGGAGCACGGTATCCTCTGCCGAAACAGAGGTTGG  
 ACAAGACCGGAGGGGTCTCCTAGTTCCAAAGGAGATGTACTCCGGGCTTGTTACGACCTACCGTGTA  
 +  
 FFFFFFFFFFFFFFFFFFFFFFFFFFFFFFFFFFFFFFFFFFFFFFFFFFFFFFFFFFFFFFFFFFFFFFFFFF  
 FFFFFFFFFFFFFFFFFFFFFFFFFFFFFFFFFFFFFFFFFFFFFFFFFFFFFFFFFFFFFFFFFFFFFFFFFF  
 @A00155:342:HHGFNDSXY:1:1613:3170:31782 1:N:0:GAACCTAG+TCCGCATA  
 GGATGTAGAGGGCGAGAGAGAGCGACTTCTCTCGGGCCACAGCCTTACAGCTGTGGAGCACGGTATC  
 CTCTGCCGAAACAGAGGTTGGACAAGACCGGAGGGGTCTCCTAGTTCCAAAGGAGATGTACTCC  
 +  
 :FFFFFFFFFFFFFFF,FFFFFFFFFFFFFFFFF:FFFFFFFFFFFFFFFFF,F:FFFFFFFFFFFFFFFFFFFFF  
 FFFFFFFFFFFFFFFFFFFFFFFFFF:FFFFFFFFFFFFFFFFFFFFFFFFFFFFFFFFFFFFFFFFFFFFF  
 @A00155:342:HHGFNDSXY:1:1614:4788:14418 1:N:0:GAACCTAG+TCCGCATA  
 AAAAAGGACTCGTCAGGTAGCCTACTAGACTACGACTTACACGGTAGGTCG  
 +  
 FFFFFFFFFFFFFFFFFFFFFFFFFFFFFFFFFFFFFFFFFFFFFFFFFFFFFFFFFFFFFFFFFFFFFF  
 @A00155:342:HHGFNDSXY:1:1614:26160:20838 1:N:0:GAACCTAG+TCCGCATA  
 ATGCCGAGAGGGATGTGGAGGGCGAGAGAGAGCGACTTCTCTCGGGCCACAGCCTTACAGCTGTGGA  
 GCACGGTATCCTCTGCCGAAACAGAGGTTGGACAAGACCGGAGGGGTCTCCTAGTTCCAAAGGAGATG  
 +  
 FFFFFFFFFFFFFF:FFFFFFFFFFFFFFFFFFFFF:FFFFFFFFFFFFFFFFFFFFFFFFFFFFFFFFFFFFF  
 FFFFFFFFFFFFFFFFFFFFFFFFFFFFFFFFFFFFFF:FFFFFFFFFFFFFFFFFFFFFFFFFFFFFFFFFFFFF  
 @A00155:342:HHGFNDSXY:1:1614:14796:30968 1:N:0:GAACCTAG+TCCGCATA  
 GTCATCTCAATGCCGAGAGGGATGTGGAGGGCGAGAGAGAGCGACTTCTCTCGGGCCACAGCCTTAC  
 AGCTGTGGAGCACGGTATCCTCTGCCGAAACAGAGGTTGGACAAGACCGGAGGGGTCTCCTAGTTCCA  
 +

FFFFFFFFFFFFFFFFFFFFFFFFFFFFFFFFFFFFFFFFFFFFFFFFFFFFFFFFFFFFFFFFFFFFFFFF  
FFFFFFFFFFFFFFFFFFFFFFFFFFFFFFFFFFFFFFFFFFFFFFFFFFFFFFFFFFFFFFFFFFFFFFFF  
@A00155:342:HHGFNDSXY:1:1614:21043:32174 1:N:0:GAACCTAG+TCCGCATA  
GAGCGACTTCTCTCGGGCCCACAGCCTTACAGCTGTGGAGCACGGTATCCTCTGCCGAAACAGAGGTT  
GGACAAGACCGGAGGGGTCTCCTAGTTCCAAAGGAGATGTACTCCGGGCTTGTTACGACCTACCGTG  
+  
FFFFFFFFFFFFFF:FFFF:FFFFFFFFFFFFFFFF:FFFF,FFFFFFFFFFFFFFFFFFFFFFFF  
FFFFFFFFFFFFFFFFFFFFFFFFFFFFFFFFFFFFFFFFFFFFFFFFFFFFFFFFFFFFFFFFFFFFFFFF  
@A00155:342:HHGFNDSXY:1:1615:18918:30060 1:N:0:GAACCTAG+TCCGCATA  
CTTCTCTCGGGCCCACAGCCTTACAGCTGTGGAGCACGGTATCCTCTGCCGAAACAGAGGTTGGACAA  
GACCGGAGGGGTCTCCTGGTTCCAAAGGAGATGTACTCCGGGCTTGTTACGACCTACCGTGTAAGTC  
+  
F:FFFFFFFFFFFFFFFFFFFFFFFF:FFFFFFFF,FFFFFFFFFFFFFFFF:FFF:FFF,:F:FFF  
:FFF:,FF:FFF:FFFFFFFFFFFFFFFF:F:FFF,FF,,FF:F:F::FFFFFF,FFFF,:FFF,F  
@A00155:342:HHGFNDSXY:1:1615:10999:32941 1:N:0:GAACCTAG+TCCGCATA  
GTGTCCACTTAAGGACTCACCTCTGGCCTATGGTCATCTCAATGCCGAGAGGGATGTGAAGGGCGAGA  
GAGAGCGACTTCTCTCGGGCCCACAGCCTTACAGCTGTGGAGCACGGTATCCTCTGCCGAAACAGAGG  
+  
FFFFFFFFFFFFFFFFFFFFFFFFFFFFFFFFFFFFFFFFFFFFFFFFFFFFFFFFFFFFFFFF:FFFF:F:FFFFFFFF  
FFFFFFFF:FFF:FFFFFFFFFFFFFFFFFFFFFFFFFFFFFFFFFFFFFFFF,FFFFFFFFFFFFFFFF  
@A00155:342:HHGFNDSXY:1:1616:18566:1266 1:N:0:GAACCTAG+TCCGCATA  
GTGTCCACTTAAGGACTCACCTCTGGCCTATGGTCATCTCAATGCCGAGAGGGATGTGGAGGGCGAGA  
GAGAGCGACTTCTCTCGGGCCCACAGCCTTACAGCTGTGGAGCACGGTATCCTCTGCCGAAACAGAGG  
+  
FFFFFFF:FFFFFFFFFFFFFFFFFFFFFFFFFFFFFFFFFFFFFFFFFFFFFFFFFFFFFFFF:FFFFFFFF  
FF:FFFFFFFFFFFFFFFFFFFFFFFFFFFFFFFFFFFFFFFFFFFFFFFFFFFFFFFFFFFFFFFF  
@A00155:342:HHGFNDSXY:1:1616:9299:25488 1:N:0:GAACCTAG+TCCGCATA  
GAGAGGGATGTAGAGGGCGAGAGAGAGCGACTTCTCTCGGGCCCACAGCCTTACAGCTGTGGAGCACG  
GTATCCTCTGCCGAAACAGAGGTTGGACAAGACCGGAGGGGTCTCCTAGTTCCAAAGGAGATGTACTC  
+  
FFFFFFFF,FFFFFFFFFFFFFFFFFFFFFFFFFFFFFFFFFFFFFFFF:FFFFFFFFFFFFFFFF  
FFFFFFFFFFFFFFFFFFFFFFFFFFFFFFFFFFFFFFFFFFFFFFFFFFFFFFFF:FFFFFFFFFFFFFFFF  
@A00155:342:HHGFNDSXY:1:1616:3278:25770 1:N:0:GAACCTAG+TCCGCATA  
TTACAGCTGTGGAGCACGGTATCCTCTGCCGAAACAGAGGTTGGACAAGACCGGAGGGGTCTCCTAGT  
TCCAAAGGAGATGTACTCCGGGCTTGTTACGACCTACCGTGTAAGTCGTAGTCTAGTAGGCTACCTG  
+  
FFFFFFFFFFFFFFFFFFFFFFFF:FFFFFFFF:FFFFFFFFFFFFFFFFFFFFFFFFFFFFFFFF  
FFFFFFFFFFFFFFFFFFFFFFFF:FFFFFFFF:FFFFF,FFFFFFFFFFFFFFFFFFFFFFFF  
@A00155:342:HHGFNDSXY:1:1617:30156:12164 1:N:0:GAACCTAG+TCCGCATA  
TGTAGAGGGCGAGAGAGAGCGACTTCTCTCGGGCCCACAGCCTTACAGCTGTGGAGCACGGTATCCTC  
TGCCGAAACAGAGGTTGGACAAGACCGGAGGGGTCTCCTAGTTCCAAAGGAGATGTACTCCGGG  
+  
FFFFFFFFFFFFFFFFFFFFFFFFFFFFFFFFFFFFFFFFFFFFFFFFFFFFFFFFFFFFFFFF  
FFFFFFFFFFFFFFFFFFFFFFFFFFFFFFFFFFFFFFFFFFFFFFFF,FFFFFFFFFFFFFFFF  
@A00155:342:HHGFNDSXY:1:1617:19235:25817 1:N:0:GAACCTAG+TCCGCATA  
CAATGCCGAGAGGGATGTAGAGGGCGAGAGAGAGCGACTTCTCTCGGGCCCACAGCCTTACAGCTGTG  
GAGCACGGTATCCTCTGCCGAAACAGAGGTTGGACAAGACCGGAGGGGTCTCCTAGTTCCAAAGGAGA  
+  
FFFFFFFFFFFFFFFF:FFFFFFFFFFFFFFFFFFFFFFFFFFFFFFFFFFFFFFFFFFFFFFFF  
FFFFFFFFFFFFFFFFFFFFFFFFFFFFFFFFFFFFFFFFFFFFFFFFFFFFFFFF:FFFFFFFFFFFF  
@A00155:342:HHGFNDSXY:1:1619:10366:7232 1:N:0:GAACCTAG+TCCGCATA  
TGCCGAGAGGGATGTGGAGGGCGAGAGAGAGCGACTTCTCTCGGGCCCACAGCCTTACAGCTGTGGAG  
CACGGTATCCTCTGCCGAAACAGAGGTTGGACAAGACCGGAGGGGTCTCCTGGTTCCAAAGGAGAT  
+

FFFFFFFFFFFF,FFFFFFFFFFFFFFFFFFFFFFFFFFFFFFFFFFFFFFFFFFFFFFFFFFFFFFFFFFFFFFFF  
FFFFFFFFFFFFFFFFFFFFFFFFFFFFFFFFFFFFFFFFFFFFFFFFFFFFFFFFFFFFFFFFFFFFFFFFFFFFFFFF  
@A00155:342:HHGFNDSXY:1:1619:10239:7326 1:N:0:GAACCTAG+TCCGCATA  
TGCCGAGAGGGATGTGGAGGGCGAGAGAGAGCGACTTCTCTCGGGCCCACAGCCTTACAGCTGTGGAG  
CACGGTATCCTCTGCCGAAACAGAGGTTGGACAAGACCGGAGGGGTCTCCTGGTTCCAAAGGAGAT  
+  
FFFFFFFFFFFFFF:FFFFFFFFFFFFFFFFFFFFFFFFFFFFFFFFFFFFFFFFFFFFFFFFFFFFFFFFFFFFFF  
FFFFFFFFFFFFFFFFFFFFFFFFFFFFFFFFFFFFFFFFFFFFFFFFFFFFFFFFFFFFFFFFFFFFFFFFFFFFFF  
@A00155:342:HHGFNDSXY:1:1619:12735:12680 1:N:0:GAACCTAG+TCCGCATA  
GCGACTTCTCTCGGGCCCACAGCCTTACAGCTGTGGAGCACGGTATCCTCTGCCGAAACAGAGGTTGG  
ACAAGACCGGAGGGGTCTCCTAGTTCCAAAGGAGATGTACTCCGGGCTTGTTACGACCTACC  
+  
FFFFFFFFFFFFFFFFFFFFFFFFFFFFFFFFFFFFFFFFFFFFFFFFFFFFFFFFFFFFFFFFFFFFFFFFFFFFFF  
FFFFFFFFFFFFFFFFFFFFFFFFFFFFFFFFFFFFFFFFFFFFFFFFFFFFFFFFFFFFFFFFFFFFFFFFFFFFFF  
@A00155:342:HHGFNDSXY:1:1619:9064:28401 1:N:0:GAACCTAG+TCCGCATA  
GAGGGATGTAGAGGGCGAGAGAGAGCGACTTCTCTCGGGCCCACAGCCTTACAGCTGTGGAGCACGGT  
ATCCTCTGCCGAAACAGAGGTTGGACAAGACCGGAGGGGTCTCCTAGTTCCAAAGGAGATGTACTCCG  
+  
FFFFFFFFFFFF:FFFFFFFFFFFFFFFFFFFFFFFFFFFFFFFFFFFFFFFFFFFFFFFFFFFFFFFFFFFFFF  
FFFFFFFFFFFFFFFFFFFFFFFFFFFFFFFFFFFFFFFFFFFFFFFFFFFFFFFFFFFFFFFFFFFFFFFFFFFF,FFFF  
@A00155:342:HHGFNDSXY:1:1619:30716:32831 1:N:0:GAACCTAG+TCCGCATA  
CTTCTCTCGGGCCCACAGCCTTACAGCTGTGGAGCACGGTATCCTCTGCCGAAACAGAGGTTGGACAA  
GACCGGAGGGGTCTCCTAGTTCCAAAGGAGATGTACTCCGGGCTTGTTACGACCTACCGTGTAAGTC  
+  
FFFFFFFFFFFFFFFFFFFFFFFFFFFFFFFFFFFFFFFFFFFFFFFFFFFFFFFFFFFFFFFFFFFFFFFFFFFF  
FFFFFFFFFFFFFFFFFFFFFFFFFFFFFFFFFFFFFFFFFFFFFFFFFFFFFFFFFFFFFFFFFFFFFFFFFFFF:FFFFFFFFFFFF  
@A00155:342:HHGFNDSXY:1:1619:31331:33238 1:N:0:GAACCTAG+TCCGCATA  
CTTCTCTCGGGCCCACAGCCTTACAGCTGTGGAGCACGGTATCCTCTGCCGAAACAGAGGTTGGACAA  
GACCGGAGGGGTCTCCTAGTTCCAAAGGAGATGTACTCCGGGCTTGTTACGACCTACCGTGTAAGTC  
+  
FFFFFFF,,FFFFFFFFFFFF,F:FFFF::FFFFFFFFFFFFFFFFFFFF:FFFFFFFFFFFF:FFFFFFF  
:F:F,FF::FFFFFF:FFFFFF,FFFFF:,F::FFFFFFFF:FFFF:FFFFFFFF:FFFFFF,FFFFF:,F:  
@A00155:342:HHGFNDSXY:1:1619:9453:36495 1:N:0:GAACCTAG+TCCGCATA  
TCTGCCGAAACAGAGGTTGGACAAGACCGGAGGGGTCTCCTAGTTCCAAAGGAGATGTACTCCGGGCT  
TGTTACGACCTACCGTGTAAGTCGTAGTCTAGTAGGCTACCTGACGAGTCCTTTTTAGGACGAACT  
+  
FFFFFFFFFFFFFFFFFFFFFFFFFFFFFFFFFFFFFFFFFFFFFFFFFFFFFFFFFFFFFFFFFFFFFFFFFFFF  
FFFFFFFFFFFFFFFFFFFFFFFFFFFFFFFFFFFFFFFFFFFFFFFFFFFFFFFFFFFFFFFFFFFFFFFFFFFF:FFFFFFFFFFFF  
@A00155:342:HHGFNDSXY:1:1620:8196:1689 1:N:0:GAACCTAG+TCCGCATA  
TCTGCCGAAACAGAGGTTGGACAAGACCGGAGGGGTCTCCTAGTTCCAAAGGAGATGTACTCCGGGCT  
TGTTACGACCTACCGTGTAAGTCGTAGTCTAGTAGGCTACCTGACGAGTCCTTTTTAGGACGAACT  
+  
FFFFFFFFFFFFFFFFFFFFFFFFFFFFFFFFFFFFFFFFFFFFFFFFFFFFFFFFFFFFFFFFFFFFFFFFFFFF  
FFFFFFFFFFFFFFFFFFFFFFFFFFFFFFFFFFFFFFFFFFFFFFFFFFFFFFFFFFFFFFFFFFFFFFFFFFFF:FFFFFFFFFFFF  
@A00155:342:HHGFNDSXY:1:1620:8929:3458 1:N:0:GAACCTAG+TCCGCATA  
GAGAGGGATGTGGAGGGCGAGAGAGAGCGACTTCTCTCGGGCCCACAGCCTTACAGCTGTGGAGCACG  
GTATCCTCTGCCGAAACAGAGGTTGGACAAGACCGGAGGGGTCTCCTAGTTCCAAAGGAGATGTACTC  
+  
FFFFFFFFFFFFFFFFFFFFFFFFFFFFFFFFFFFFFFFFFFFFFFFFFFFFFFFFFFFFFFFFFFFFFFFFFFFF  
FFFFFFFFFFFFFFFFFFFFFFFFFFFFFFFFFFFFFFFFFFFFFFFFFFFFFFFFFFFFFFFFFFFFFFFFFFFF  
@A00155:342:HHGFNDSXY:1:1620:21151:10911 1:N:0:GAACCTAG+TCCGCATA  
CACATCCCTCTCGGCATTGAGATGACCATAGGCCAGAGGTGAGTCCTTAAGTGGACACAGCTGATCTA  
AGGCGGTGTGGTGGGGCATGGGTTTGAACCCCATGACGGTCGGAGTCTAGTAGGCTCCCTGATGAGT  
+

```

FFFFFFFFFFFFFFFFFFFFFFFFFFFFFFFFFFFFFFFFFFFFFFFFFFFFFFFFFFFFFFFFFFFFFFFFFFFF:FFFFFFFFFF:FFFFFFF
FFFFFFFFFFFFFFFFFFFFFFFFFFFFFFFFFFFFFFFFFFFFFFFFFFFFFFFFFFFFFFFFFFFFFFFFFFFF:FFFFFFFFFF:FFFFFFF
@A00155:342:HHGFNDSXY:1:1620:31177:21574 1:N:0:GAACCTAG+TCCGCATA
GGATGTGGAGGGCGAGAGAGAGCGACTTCTCTCGGGCCCACAGCCTTACAGCTGTGGAGCACGGTATC
CTCTGCCGAAACAGAGGTTGGACAAGACCGGAGGGGTCTCCTAGTTCCAAAGGAGATGTACTCC
+
FFFFFFFFFFFFFFFF:FFFFFFFFFF:FFFFFFFFFFFFFFFFFFFFFFFFFFFFFFFFFFFFFFFFFFFFFFFF:FFFFFFFFFF
FFFFFFFFFFFFFFFFFFFFFFFFFFFFFFFFFFFFFFFFFFFFFFFFFFFFFFFFFFFFFFFFFFFFFFFFFFFF
@A00155:342:HHGFNDSXY:1:1620:15157:22451 1:N:0:GAACCTAG+TCCGCATA
ACTTCTCTCGGGCCCACAGCCTTACAGCTGTGGAGCACGGTATCCTCTGCCGAAACAGAGGTTGGACA
AGACCGGAGGGGTCTCCTAGTTCCAAAGGAGATGTACTCCGGGCTTGTTACGACCTACCGTGTAGT
+
FFFFFFFFFFFFFFFFFFFFFFFFFFFFFFFFFFFFFFFFFFFFFFFFFFFFFFFFFFFFFFFFFFFFFFFFFFFF
FFFFFFFFFFFFFFFFFFFFFFFFFFFFFFFFFFFFFFFFFFFFFFFFFFFFFFFFFFFFFFFFFFFFFFFFFFFF
@A00155:342:HHGFNDSXY:1:1620:28583:31203 1:N:0:GAACCTAG+TCCGCATA
GAGCGACTTCTCTCGGGCCCACAGCCTTACAGCTGTGGAGCACGGTATCCTCTGCCGAAACAGAGGTT
GGACAAGACCGGAGGGGTCTCCTGGTTCCAAAGGAGATGTACTCCGGGCTTGTTACGACCTACCGTG
+
FFFFFFFFFFFFFFFFFFFFFFFFFFFFFFFFFFFFFFFFFFFFFFFFFFFFFFFFFFFFFFFFFFFFFFFFFFFF
FFFFFFFFFFFFFFFFFFFFFFFFFFFFFFFFFFFFFFFFFFFFFFFFFFFFFFFFFFFFFFFFFFFFFFFFFFFF:FFFFFFFFFF:FFFFFFFFFFFFFFFFFFFF:F
@A00155:342:HHGFNDSXY:1:1621:27769:3208 1:N:0:GAACCTAG+TCCGCATA
ATCTCAATGCCGAGAGGGATGTGGAGGGCGAGAGAGAGCGACTTCTCTCGGGCCCACAGCCTTACAGC
TGTGGAGCACGGTATCCTCTGCCGAAACAGAGGTTGGACAAGACCGGAGGGGTCTCCTAGTTCCAAAG
+
FF::FFFFF:FFFFF::FFFFF,FFFF,F,FFFF::,FFFFFFFFFFFF:FFFFF:FFFFFFFFFFFF
::FFFFF:FFFFFFFFFFFFFFFF:FFFFFFFFFF:FF:FFF:F:FF,FFFFFFFF:FF:F:FFFFF:FFFF
@A00155:342:HHGFNDSXY:1:1622:25156:7670 1:N:0:GAACCTAG+TCCGCATA
TGTCCTTAAGGACTCTCCTCTGGCCTATGGTCATCTCAATGCCGAGAGGGATGTGGAGGGCGAGAG
AGAGCGACTTCTCTCGGGCCCACAGCCTTACAGCTGTGGAGCACGGTATCCTCTGCCGAAACAGAGGT
+
FFFFFFFFFFFFFFFFFFFFFFFFFFFFFFFFFFFFFFFFFFFFFFFFFFFFFFFFFFFFFFFFFFFFFFFFFFFF
FFFFFFFFFFFFFFFFFFFFFFFFFFFFFFFFFFFFFFFFFFFFFFFFFFFFFFFFFFFFFFFFFFFFFFFFFFFF
@A00155:342:HHGFNDSXY:1:1622:21404:15515 1:N:0:GAACCTAG+TCCGCATA
CCACATCCCTCTCGGCATTGAGATGACCATAGGCCAGAGGTGAGTCCTTAAGTGGACACAGCTGATCT
AAGGCGGTGTGGCGGGCATGTGTTGAACCCCATGACGGTCGGAGTCTAGTAGGCTCCCTGATG
+
F:FF::F:,F:FF::,,F,FFF,:F,F:,F:F,FF,FFF::FFF,,,FFFF:F,:FFFF:FFFF,F:,,:
,FFFF,,FF,:,FF,FF,FFF,:F,FF::F,FF,FFFF,FFF:F:F,F,,FF,,F:FFF,F,:FF
@A00155:342:HHGFNDSXY:1:1622:18783:30577 1:N:0:GAACCTAG+TCCGCATA
GGATGTGGAGGGCGAGAGAGAGCGACTTCTCTCGGGCCCACAGCCTTACAGCTGTGGAGCACGGTATC
CTCTGCCGAAACAGAGGTTGGACAAGACCGGAGGGGTCTCCTAGTTCCAAAGGAGATGTACTCC
+
FFFFFFFFFFFFFFFFFFFFFFFFFFFFFFFFFFFFFFFFFFFFFFFFFFFFFFFFFFFFFFFFFFFFFFFFFFFF
FFFFFFFFFFFFFFFFFFFFFFFFFFFFFFFFFFFFFFFFFFFFFFFFFFFFFFFFFFFFFFFFFFFFFFFFFFFF:FFFFFFFFFFFFFFFFFF
@A00155:342:HHGFNDSXY:1:1622:18747:30859 1:N:0:GAACCTAG+TCCGCATA
GGATGTGGAGGGCGAGAGAGAGCGACTTCTCTCGGGCCCACAGCCTTACAGCTGTGGAGCACGGTATC
CTCTGCCGAAACAGAGGTTGGACAAGACCGGAGGGGTCTCCTAGTTCCAAAGGAGATGTACTCC
+
FFFFFFFFFFFFFFFFFFFFFFFFFFFFFFFFFFFFFFFFFFFFFFFFFFFFFFFFFFFFFFFFFFFFFFFFFFFF
FFFFFFFFFFFFFFFFFFFFFFFFFFFFFFFFFFFFFFFFFFFFFFFFFFFFFFFFFFFFFFFFFFFFFFFFFFFF
@A00155:342:HHGFNDSXY:1:1623:4915:2957 1:N:0:GAACCTAG+TCCGCATA
CACCTCTGGCCTATGGTCATCTCAATGCCGAGAGGGATGTGGAGGGCGAGAGAGAGCGACTTCTCTCG
GGCCCACAGCCTTACAGCTGTGGAGCACGGTATCCTCTGCCGAAACAGAGGTTGGACAAGACCGGAGG
+

```

FFFFFFFFFFFFFFFFFFFFFFFFFFFFFFFFFFFFFFFFFFFFFFFFFFFFFFFFFFFFFFFFFFFFFFFF  
FFFFFFFFFFFFFFFFFFFFFFFFFFFFFFFFFFFFFFFFFFFFFFFFFFFFFFFFFFFFFFFFFFFFFFFF  
@A00155:342:HHGFNDSXY:1:1623:21504:5290 1:N:0:GAACCTAG+TCCGCATA  
TATCCTCTGCCGAAACAGAGGTTGGACAAGACCGGAGGGGTCTCCTAGTTCCAAAGGAGATGTACTCC  
GGGCTTGTTACGACCTACCGTGTAAGTCGTAGTCTAGTAGGCTACCTGACGAGTCCTTTTAGGACG  
+  
FFFFFFFFFFFFFFFFFFFFFFFFFFFFFFFFFFFFFFFFFFFFFFFFFFFFFFFFFFFFFFFFFFFFFFFF  
FFFFFFFFFFFFFFFFFFFFFFFFFFFFFFFFFFFFFFFFFFFFFFFFFFFFFFFFFFFFFFFFFFFFFFFF  
@A00155:342:HHGFNDSXY:1:1623:20961:7232 1:N:0:GAACCTAG+TCCGCATA  
TTAAGGACTCACCTCTGGCCTATGGTCATCTCAATGCCGAGAGGGATGTGAAGGGCGAGAGAGAGCGA  
CTTCTCTCGGGCCACAGCCTTACAGCTGTGGAGCACGGTATCCTCTGCCGAAACAGAGGTTGGACAA  
+  
FFFFFFFFFFFFFFFFFFFFFFFFFFFFFFFFFFFFFFFFFFFFFFFFFFFFFFFFFFFFFFFFFFFFFFFF  
FFFFFFFFFFFFFFFFFFFFFFFFFFFFFFFFFFFFFFFFFFFFFFFFFFFFFFFFFFFFFFFFFFFFFFFF  
@A00155:342:HHGFNDSXY:1:1623:27281:14888 1:N:0:GAACCTAG+TCCGCATA  
TGCCCCGCCACACCGCCTTAGATCAGCTGTGTCCACTTAAGGACTCACCTCTGGCCTATGGTCATCTC  
AATGCCGAGAGGGATGTGGAGGGCGAGAGAGAGCGACTTCTCTCGGGCCACAGCCTTACAGCTGTGG  
+  
FFFFFFFFFFFFFFFFFFFFFFFFFFFFFFFFFFFFFFFFFFFFFFFFFFFFFFFFFFFFFFFFFFFFFFFF  
FFFFFFFFFFFFFFFFFFFFFFFFFFFFFFFFFFFFFFFFFFFFFFFFFFFFFFFFFFFFFFFFFFFFFFFF  
@A00155:342:HHGFNDSXY:1:1623:3188:33317 1:N:0:GAACCTAG+TCCGCATA  
GATGTGGAGGGCGAGAGAGAGCGACTTCTCTCGGGCCACAGCCTTACAGCTGTGGAGCACGGTATGC  
TCTGCCGAAACAGAGGTTGGACAAGACCGGAGGGGTCTCCTAGTTCCAAAGGAGATGTACTCCGGGCT  
+  
FFFFFFFFFFFFFFFFFFFFFFFFFFFFFFFFFFFFFFFFFFFFFFFFFFFFFFFFFFFFFFFFFFFFFFFF  
FFFFFFFFFFFFFFFFFFFFFFFFFFFFFFFFFFFFFFFFFFFFFFFFFFFFFFFFFFFFFFFFFFFFFFFF  
@A00155:342:HHGFNDSXY:1:1623:5159:33974 1:N:0:GAACCTAG+TCCGCATA  
AGCGACTTCTCTCGGGCCACAGCCTTACAGCTGTGGAGCACGGTATCCTCTGCCGAAACAGAGGTTG  
GACAAGACCGGAGGGGTCTCCTAGTTCCAAAGGAGATGTACTCCGGGCTTGTTACGACCTACCGTGT  
+  
FFFFFFFFFFFFFFFFFFFFFFFFFFFFFFFFFFFFFFFFFFFFFFFFFFFFFFFFFFFFFFFFFFFFFFFF  
FFFFFFFFFFFFFFFFFFFFFFFFFFFFFFFFFFFFFFFFFFFFFFFFFFFFFFFFFFFFFFFFFFFFFFFF  
@A00155:342:HHGFNDSXY:1:1623:2555:35383 1:N:0:GAACCTAG+TCCGCATA  
GGATGTGGAGGGCGAGAGAGAGCGACTTCTCTCGGGCCACAGCCTTACAGCTGTGGAGCACGGTATC  
CTCTGCCGAAACAGAGGTTGGACAAGACCGGAGGGGTCTCCTAGTTCCAAAGGAGATGTACTCC  
+  
FFFFFFFFFFFFFFFFFFFFFFFFFFFFFFFFFFFFFFFFFFFFFFFFFFFFFFFFFFFFFFFFFFFFFFFF  
FFFFFFFFFFFFFFFFFFFFFFFFFFFFFFFFFFFFFFFFFFFFFFFFFFFFFFFFFFFFFFFFFFFFFFFF  
@A00155:342:HHGFNDSXY:1:1624:12472:27633 1:N:0:GAACCTAG+TCCGCATA  
GAGAGGGATGTGGAGGGCGAGAGAGAGCGACTTCTCTCGGGCCACAGCCTTACAGCTGTGGAGCACG  
GTATCCTCTGCCGAAACAGAGGTTGGACAAGACCGGAGGGGTCTCCTAGTTCCAAAGGAGATGTACTC  
+  
FFFFFFFFFFFFFFFFFFFFFFFFFFFFFFFFFFFFFFFFFFFFFFFFFFFFFFFFFFFFFFFFFFFFFFFF  
FFFFFFFFFFFFFFFFFFFFFFFFFFFFFFFFFFFFFFFFFFFFFFFFFFFFFFFFFFFFFFFFFFFFFFFF  
@A00155:342:HHGFNDSXY:1:1624:20573:34240 1:N:0:GAACCTAG+TCCGCATA  
ATGCCCCGCCACACCGCCTTAGATCAGCTGTGTCCACTTAAGAACTCACCTCTGGCCTATGGTCATCT  
CAATGCCGAGAGGGATGTGGAGGGCGAGAGAGAGCGACTTCTCTCGGGCCACAGCCTTACAGC  
+  
FFFFFFFFFFFFFFFFFFFFFFFFFFFFFFFFFFFFFFFFFFFFFFFFFFFFFFFFFFFFFFFFFFFFFFFF  
FFFFFFFFFFFFFFFFFFFFFFFFFFFFFFFFFFFFFFFFFFFFFFFFFFFFFFFFFFFFFFFFFFFFFFFF  
@A00155:342:HHGFNDSXY:1:1624:21269:37043 1:N:0:GAACCTAG+TCCGCATA  
ATGCCCCGCCACACCGCCTTAGATCAGCTGTGTCCACTTAAGAACTCACCTCTGGCCTATGGTCATCT  
CAATGCCGAGAGGGATGTGGAGGGCGAGAGAGAGCGACTTCTCTCGGGCCACAGCCTTACAGC  
+

FFFFFFFFFFFFFFFFFFFFFFFFFFFFFFFFFFFFFFFFFFFFFFFFFFFFFFFFFFFFFFFFFFFFFFFFFFFFFFFF  
FFFFFFFFFFFFFFFFFFFFFFFFFFFFFFFFFFFFFFFFFFFFFFFFFFFFFFFFFFFFFFFFFFFFFFFFFFFFFFFF  
@A00155:342:HHGFNDSXY:1:1625:22110:1454 1:N:0:GAACCTAG+TCCGCATA  
CACATCCCTCTCGGCATTGAGATGACCATAGGCCAGAGGTGAGTCCTTAAGTGGACACAGCTGATCTA  
AGGCGGTGTGGCGGGGCATGGGTTTGAACCCCCATGACGGTCGGAGTCTAGTAGGCTCCCTGATGAG  
+  
FFF:FFFFFF:FFFFF,:FFFF:FFFFFFFFFFFFFFFFFFFFFFFFFFFFFFFFFFFFFFFFFFFFFFFF:FFFFFFFFF:FFFFF:FFF  
FFFFFF,FFFFFF:,FF,FF:F::FFFFFFFFFFFFFFFFFFFFFFFFFFFFFFFFFFFFFFFFFFFFFFFF:FFFFFFFFFFFFFFFF  
@A00155:342:HHGFNDSXY:1:1625:30752:4022 1:N:0:GAACCTAG+TCCGCATA  
ACCTCTGTTTCGGCAGAGGATACCGTGCTCCACAGCTGTAAGGCTGTGGGCCCCGAGAGAAGTCGCTCT  
CTCTCGCCCTCCACATCCCTCTCGGCATTGAGATGACCATAGGCCAGAGGAGAGTCCTTAAGTGGACA  
+  
FFFFFFFFFFFFFFFFFFFFFFFFFFFFFFFFFFFFFFFFFFFFFFFFFFFFFFFFFFFFFFFFFFFFFFFFFFFFFFFF:FFFFFFFFF  
FFFFFFFFFFFFFFFFFFFFFFFFFFFFFFFFFFFFFFFFFFFFFFFFFFFFFFFFFFFFFFFFFFFFFFFFFFFFFFFF:FFFFFFFFF  
@A00155:342:HHGFNDSXY:1:1625:11134:5181 1:N:0:GAACCTAG+TCCGCATA  
TCTCTCGGGCCACAGCCTTACAGCTGTGGAGCACGGTATCCTCTGCCGAAACAGAGGTTGGACAAGA  
CCGAGAGGGTCTCCTAGTTCCAAAGGAGATGTACTCCGGGCTTGTTACAGACCTACCGTGTAAGTCGT  
+  
FFFFFFFFFFFFFFFFFFFFFFFFFFFFFFFFFFFFFFFFFFFFFFFFFFFFFFFFFFFFFFFFFFFFFFFFFFFFFFFF:FFFFFFFFF  
FFFFFFFFFFFFFFFFFFFFFFFFFFFFFFFFFFFFFFFFFFFFFFFFFFFFFFFFFFFFFFFFFFFFFFFFFFFFFFFF:FFFFFFFFF  
@A00155:342:HHGFNDSXY:1:1625:8684:5885 1:N:0:GAACCTAG+TCCGCATA  
CAGCCTTACAGCTGTGGAGCACGGTATCCTCTGCCGAAACAGAGGTTGGACAAGACCGAGGGGTCTC  
CTAGTTCCAAAGGAGATGTACTCCGGGCTTGTTACAGACCTACCGTGTAAGTCGTAGTCTAGTAGGCT  
+  
FFFFFFFFFFFFFFFFFFFFFFFFFFFFFFFFFFFFFFFFFFFFFFFFFFFFFFFFFFFFFFFFFFFFFFFFFFFFFFFF:FFFFFFFFF  
FFFFFFFFFFFFFFFFFFFFFFFFFFFFFFFFFFFFFFFFFFFFFFFFFFFFFFFFFFFFFFFFFFFFFFFFFFFFFFFF:FFFFFFFFF  
@A00155:342:HHGFNDSXY:1:1625:16911:24643 1:N:0:GAACCTAG+TCCGCATA  
AATGCCGAGAGGGATGTGGAGGGCGAGAGAGAGCGACTTCTCTCGGGCCACAGCCTTACAGCTGTGG  
AGCACGGTATCCTCTGCCGAAACAGAGGTTGGACAAGACCGAGGGGTCTCCTAGATCCAAAGGAGAT  
+  
FFFFFFFF:FFFFFFFFFFFFFFFFFFFFFFFFFFFFFFFFFFFFFFFFFFFFFFFFFFFFFFFFFFFFFFFFFFFFFFFF:FFFFFFFFF  
FFFFFFFFFFFFFFFFFFFFFFFFFFFFFFFFFFFFFFFFFFFFFFFFFFFFFFFFFFFFFFFFFFFFFFFFFFFFFFFF:FFFFFFFFF  
@A00155:342:HHGFNDSXY:1:1625:15239:26976 1:N:0:GAACCTAG+TCCGCATA  
GAGAGGGATGTAGAGGGCGAGAGAGAGCGACTTCTCTCGGGCCACAGCCTTACAGCTGTGGAGCACG  
GTATCCTCTGCCGAAACAGAGGTTGGACAAGACCGAGGGGTCTCCTAGTTCCAAAGGAGATGTACTC  
+  
FFFFFFFFFFFFFFFFFFFFFFFFFFFFFFFFFFFFFFFFFFFFFFFFFFFFFFFFFFFFFFFFFFFFFFFFFFFFFFFF:FFFFFFFFF  
FFFFFFFFFFFFFFFFFFFFFFFFFFFFFFFFFFFFFFFFFFFFFFFFFFFFFFFFFFFFFFFFFFFFFFFFFFFFFFFF:FFFFFFFFF  
@A00155:342:HHGFNDSXY:1:1626:14389:16391 1:N:0:GAACCTAG+TCCGCATA  
TCTCAATGCCGAGAGGGATGTGGAGGGCGAGAGAGAGCGACTTCTCTCGGGCCACAGCCTTACAGCT  
GTGGAGCACGGTATCCTCTGCCGAAACAGAGGTTGGACAAGACCGAGGGGTCTCCTAGTTCCAAAGG  
+  
FFFFFFFFFFFFFFFFFFFFFFFFFFFFFFFFFFFFFFFFFFFFFFFFFFFFFFFFFFFFFFFFFFFFFFFFFFFFFFFF:FFFFFFFFF  
FFFFFFFFFFFFFFFFFFFFFFFFFFFFFFFFFFFFFFFFFFFFFFFFFFFFFFFFFFFFFFFFFFFFFFFFFFFFFFFF:FFFFFFFFF  
@A00155:342:HHGFNDSXY:1:1626:3983:26428 1:N:0:GAACCTAG+TCCGCATA  
CTCTGGCCTATGGTCATCTCAATGCCGAGAGGGATGTAGAGGGCGAGAGAGAGCGACTTCTCTCGGGC  
CCACAGCCTTACAGCTGTGGAGCACGGTATCCTCTGCCGAAACAGAGGTTGGACAAGACCGAGGGGT  
+  
FFFFFFFFF:FFFFFFFFFFFF:FFFF:FFFFFF:F:FFFFFFFFFFFFFFFFF:FFFFFFFFFFFFFFFFF  
FFFFFFFFF:FFFFFFFFFFFFFFFFFFFFFFFFFFFFFFFFFFFFFFFFFFFFFFFFFFFFFFFFFFFFFFFFF  
@A00155:342:HHGFNDSXY:1:1626:15582:30232 1:N:0:GAACCTAG+TCCGCATA  
CTTCTCTCGGGCCACAGCCTTACAGCTGTGGAGCACGGTATCCTCTGCCGAAACAGAGGTTGGACAA  
GACCGGAGGGGTCTCCTAGTTCCAAAGGAGATGTACTCCGGGCTTGTTACAGACCTACCGTGTAAGTC  
+

FFFFFFFFFFFFFFFFFFFFFFFFFFFFFFFFFFFFFFFFFFFFFFFFFFFFFFFFFFFFFFFFFFFFFFFFFFFFFFFFFFFFF:  
FFFFFFFFFFFFFFFFFFFFFFFFFFFFFFFFFFFFFFFFFFFFFFFFFFFFFFFFFFFFFFFFFFFFFFFFFFFFFFFFFFFF  
@A00155:342:HHGFNDSXY:1:1626:1551:35963 1:N:0:GAACCTAG+TCCGCATA  
CTATGGTCATCTCAATGCCGAGAGGGATGTGGAGGGCGAGAGAGAGCGACTTCTCTCGGGCCCACAGC  
CTTACAGCTGTGGAGCACGGTATCCTCTGCCGAAACAGAGGTTGGACAAGACCGGAGGGGTCTCCTAG  
+  
FFFFFFFFFFFFFFFFFFFFFFFFFFFFFFFFFFFFFFFFFFFFFFFFFFFFFFFFFFFFFFFFFFFFFFFFFFFFFFFFFFFF:  
FFFFFFFFFFFFFFFFFFFFFFFFFFFFFFFFFFFFFFFFFFFFFFFFFFFFFFFFFFFFFFFFFFFFFFFFFFFFFFFFFFFF:  
@A00155:342:HHGFNDSXY:1:1627:23809:20556 1:N:0:GAACCTAG+TCCGCATA  
ACCCCTCCGGTCTTGTC AACCTCTGTTTCGGCAGAGGATACC GTCTCCACAGCTGTAAGGCTGTGG  
GCCCGAGAGAAGTCGCTCTCTCGCCCTCCACATCCCTCTCGGCATTGAGATGACCATAGGCCAGAG  
+  
FFFFFFFFFFFFFFFFFFFFFFFFFFFFFFFFFFFFFFFFFFFFFFFFFFFFFFFFFFFFFFFFFFFFFFFFFFFFFFFFFFFF:  
FFFFFFFFFFFFFFFFFFFFFFFFFFFFFFFFFFFFFFFFFFFFFFFFFFFFFFFFFFFFFFFFFFFFFFFFFFFFFFFFFFFF:  
@A00155:342:HHGFNDSXY:1:1628:24343:5822 1:N:0:GAACCTAG+TCCGCATA  
CGACTTCTCTCGGGCCCCACAGCCTTACAGCTGTGGAGCACGGTATCCTCTGCCGAAACAGAGGTTGGA  
CAAGACCGGAGGGGTCTCCTAGTTCAAAGGAGATGTACTCCGGGCTTG TTCACGACCTACCGTGTAA  
+  
FFFFFFFFFFFFFFFFFFFFFFFFFFFFFFFFFFFFFFFFFFFFFFFFFFFFFFFFFFFFFFFFFFFFFFFFFFFFFFFFFFFF:  
FFFFFFFFFFFFFFFFFFFFFFFFFFFFFFFFFFFFFFFFFFFFFFFFFFFFFFFFFFFFFFFFFFFFFFFFFFFFFFFFFFFF:  
@A00155:342:HHGFNDSXY:1:1628:25265:34851 1:N:0:GAACCTAG+TCCGCATA  
TTCTCTCGGGCCCACAGCCTTACAGCTGTGGAGCACGGTATCCTCTGCCGAAACAGAGGTTGGACAAG  
ACCGGAGGGGTCTCCTAGTTCAAAGGAGATGTACTCCGGGCTTG T TCACGACCTACCGTGTAAAGTCG  
+  
FFFFFFFFFFFFFFFFFFFFFFFFFFFFFFFFFFFFFFFFFFFFFFFFFFFFFFFFFFFFFFFFFFFFFFFFFFFFFFFFFFFF:  
FFFFFFFFFFFFFFFFFFFFFFFFFFFFFFFFFFFFFFFFFFFFFFFFFFFFFFFFFFFFFFFFFFFFFFFFFFFFFFFFFFFF:  
@A00155:342:HHGFNDSXY:1:1629:25880:4288 1:N:0:GAACCTAG+TCCGCATA  
AGAGAGAGCGACTTCTCTCGGGCCCACAGCCTTACAGCTGTGGAGCACGGTATCCTCTGCCGAAACAG  
AGGTTGGACAAGACCGGAGGGGTCTCCTGGTTCAAAGGAGATGTACTCCGGGCTTG TTCACGACCTA  
+  
FFFFFFFFFFFFFFFFFFFFFFFFFFFFFFFFFFFFFFFFFFFFFFFFFFFFFFFFFFFFFFFFFFFFFFFFFFFFFFFFFFFF:  
FFFFFFFFFFFFFFFFFFFFFFFFFFFFFFFFFFFFFFFFFFFFFFFFFFFFFFFFFFFFFFFFFFFFFFFFFFFFFFFFFFFF:  
@A00155:342:HHGFNDSXY:1:1629:13711:12962 1:N:0:GAACCTAG+TCCGCATA  
GACTTCTCTCGGGCCCACAGCCTTACAGCTGTGGAGCACGGTATCCTCTGCCGAAACAGAGGTTGGAC  
AAGACCGGAGGGGTCTCCTAGTTCAAAGGAGATGTACTCCGGGCTTG TTCACGACCTACCGTGTAA  
+  
FFFFFFFFFFFFFFFFFFFFFFFFFFFFFFFFFFFFFFFFFFFFFFFFFFFFFFFFFFFFFFFFFFFFFFFFFFFFFFFFFFFF:  
FFFFFFFFFFFFFFFFFFFFFFFFFFFFFFFFFFFFFFFFFFFFFFFFFFFFFFFFFFFFFFFFFFFFFFFFFFFFFFFFFFFF:  
@A00155:342:HHGFNDSXY:1:1629:23773:13385 1:N:0:GAACCTAG+TCCGCATA  
CTCAATGCCGAGAGGGATGTGGAGGGCGAGAGAGAGCGACTTCTCTCGGGCCCACAGCCTTACAGCTG  
TGGAGCACGGTATCCTCTGCCGAAACAGAGGTTGGACAAGACCGGAGGGGTCTCCTAGTTCAAAGGA  
+  
FFFFFFFFFFFFFFFFFFFFFFFFFFFFFFFFFFFFFFFFFFFFFFFFFFFFFFFFFFFFFFFFFFFFFFFFFFFFFFFFFFFF:  
FFFFFFFFFFFFFFFFFFFFFFFFFFFFFFFFFFFFFFFFFFFFFFFFFFFFFFFFFFFFFFFFFFFFFFFFFFFFFFFFFFFF:  
@A00155:342:HHGFNDSXY:1:1629:25789:14465 1:N:0:GAACCTAG+TCCGCATA  
AGCGACTTCTCTCGGGCCCACAGCCTTACAGCTGTGGAGCACGGTATCCTCTGCCGAAACAGAGGTTG  
GACAAGACCGGAGGGGTCTCCTAGTTCAAAGGAGATGTACTCCGGGCTTG TTCACGACCTACCGTGT  
+  
FFFFFFFFFFFFFFFFFFFFFFFFFFFFFFFFFFFFFFFFFFFFFFFFFFFFFFFFFFFFFFFFFFFFFFFFFFFFFFFFFFFF:  
FFFFFFFFFFFFFFFFFFFFFFFFFFFFFFFFFFFFFFFFFFFFFFFFFFFFFFFFFFFFFFFFFFFFFFFFFFFFFFFFFFFF:  
@A00155:342:HHGFNDSXY:1:1629:7762:21198 1:N:0:GAACCTAG+TCCGCATA  
GAGCGACTTCTCTCGGGCCCACAGCCTTACAGCTGTGGAGCACGGTATCCTCTGCCGAAACAGAGGTT  
GGACAAGACCGGAGGGGTCTCCTAGTTCAAAGGAGATGTACTCCGGGCTTG TTCACGACCTACCGT

FFFFFFFFFFFFFFFFFFFFFFFFFFFFFFFFFFFFFFFFFFFFFFFFFFFFFFFFFFFFFFFFFFFFFFFF  
FFFFFFFFFFFFFFFFFFFFFFFFFFFFFFFFFFFFFFFFFFFFFFFFFFFFFFFFFFFFFFFFFFFFFFFF  
@A00155:342:HHGFNDSXY:1:1629:26106:32111 1:N:0:GAACCTAG+TCCGCATA  
TTCTCTCGGGCCACAGCCTTGCAGCTGTGGAGCACGGTATCCTCTGCCGAAACAGAGGTTGGACAAG  
ACCGGAGGGGTCTCCTAGTTCCAAAGGAGATGTACTCCGGGCTTGTTACGACCTACCGTGTAAGTCG  
+  
FFFFFFFFFFFFFFFFFFFFFFFFFFFFFFFFFFFFFFFFFFFFFFFFFFFFFFFFFFFFFFFFFFFFFFFF  
FFFFFFFFFFFFFFFFFFFFFFFFFFFFFFFFFFFFFFFFFFFFFFFFFFFFFFFFFFFFFFFFFFFFFFFF  
@A00155:342:HHGFNDSXY:1:1629:6262:36104 1:N:0:GAACCTAG+TCCGCATA  
TCCGGTCTTGTCCAACCTCTGTTTCGGCAGAGGATACCGTGCTCCACAGCTGTAAGGCTGTGGGCCCCG  
AGAGAAGTCGCTCTCTCTCGCCCTTCACATCCCTCTCGGCATTGAGATGACCATAGGCCAGAGGTGAG  
+  
FFFFFFFFFFFFFFFFFFFFFFFF:FFF:F,FFFFFF::FFF:FFFFFFFFFFFFFFFFFFFFFFFFFFFFF  
FFFFFFFFFFFFFFFFFFFFFFFFFFFFFFFFFFFFFFFFFFFFFFFFFFFFFFFFFFFFFFFFFFFFFFFF  
@A00155:342:HHGFNDSXY:1:1630:8666:17910 1:N:0:GAACCTAG+TCCGCATA  
GAGAGGGATGTGGAGGGCGAGAGAGAGCGACTTCTCTCGGGCCACAGCCTTACAGCTGTGGAGCACG  
GTATCCTCTGCCGAAACAGAGGTTGGACAAGACCGGAGGGGTCTCCTAGTTCCAAAGGAGATGTACTC  
+  
FFFFFFFFFFFFFFFFFFFFFFFFFFFFFFFFFFFFFFFFFFFFFFFFFFFFFFFFFFFFFFFFFFFFFFFF  
FFFFFFFFFFFFFFFFFFFFFFFFFFFFFFFFFFFFFFFFFFFFFFFFFFFFFFFFFFFFFFFFFFFFFFFF  
@A00155:342:HHGFNDSXY:1:1630:18927:35274 1:N:0:GAACCTAG+TCCGCATA  
AATGCCGAGAGGGATGTAGAGGGCGAGAGAGAGCGACTTCTCTCGGGCCACAGCCTTACAGCTGTGG  
AGCACGGTATCCTCTGCCGAAACAGAGGTTGGACAAGACCGGAGGGGTCTCCTAGTTCCAAAGGAGAT  
+  
FFFFFFFFFFFFFFFFFFFFFFFFFFFFFFFFFFFFFFFF:FFFFFFFFFFFFFFFFFFFFFFFFFFFFFFFF  
FFFFFFFFFFFFFFFFFFFFFFFF:FFFFFFFFFFFFFFFFFFFFFFFFFFFFFFFFFFFFFFFFFFFFFFFF  
@A00155:342:HHGFNDSXY:1:1631:15845:16094 1:N:0:GAACCTAG+TCCGCATA  
TGTTTCGGCAGAGGATACCGTGCTCCACAGCTGTAAGGCTGTGGGCCCCGAGAGAAGTCGCTCTCTC  
GCCCTCTACATCCCTCTCGGCATTGAGATGACCATAGGCCAGAGGTGAGTCCTTAAGTGGACACAGCT  
+  
FFFFFFFFFFFFFFFFFFFFFFFFFFFFFFFF:FFFF:FFFFFFFFFFFFFFFFFFFFFFFFFFFFFFFF  
FFFFFFFFFFFFFFFFFFFFFFFFFFFFFFFFFFFFFFFFFFFFFFFFFFFFFFFFFFFFFFFFFFFFFFFF:  
@A00155:342:HHGFNDSXY:1:1631:2908:16799 1:N:0:GAACCTAG+TCCGCATA  
GGGCGAGAGAGAGCGACTTCTCTCGGGCCACAGCCTTACAGCTGTGGAGCACGGTATCCTCTGCCGA  
AACAGAGGTTGGACAAGACCGGAGGGGTCTCCTGGTTCCAAAGGAGATGTACTCCGGGCTTGTTACG  
+  
FFFFFFFFFFFFFFFFFFFFFFFFFFFFFFFF:FFFFFFFFFFFFFFFFFFF,F:FFFFFF:FFFFFFF  
FFFF:FFFFFFFFFFFF:FFFFFFFFFFFFFFFF:FFF:FFF:FFFFFFFFFF:FFFFFFFFFFFFF  
@A00155:342:HHGFNDSXY:1:1631:23484:19711 1:N:0:GAACCTAG+TCCGCATA  
GAGAGGGATGTGGAGGGCGAGAGAGAGCGACTTCTCTCGGGCCACAGCCTTACAGCTGTGGAGCACG  
GTATCCTCTGCCGAAACAGAGGTTGGACAAGACCGGAGGGGTCTCCTAGTTCCAAAGGAGATGTACTC  
+  
FFFFFFFFFFF:FFFFFFFFFFFFFFFFFFFFFFFFFFFFFFFFFFFFFFFFFFFFFFFFFFFFFFFFFFFF  
FFFFFFFFFFFFFFFFFFFFFFFFFFFFFFFFFFFFFFFFFFFFFFFFFFFFFFFFFFFFFFFFFFFFFFFF:  
@A00155:342:HHGFNDSXY:1:1631:1452:33035 1:N:0:GAACCTAG+TCCGCATA  
CCTCTGGCCTATGGTCATCTCAATGCCGAGAGGGATGTGGAGGGCGAGAGAGAGCGACTTCTCTCGGG  
CCCACAGCCTTACAGCTGTGGAGCACGGTATCCTCTGCCGAAACAGAGGTTGGACAAGAC  
+  
FFFFFFFFF:FFFFFFFFFFFFFFFFFFFFFFFF:FFFFFFFFFFFFFFFF:FFFF:FFFFFFFFFF:FFF  
FFFFFFFFFFFFFFFFFFFFFFFFFFFFFFFFFFFFFFFFFFFFFFFFFFFFFFFFFFFFFFFF:FFFFFFF:FFFF:F  
@A00155:342:HHGFNDSXY:1:1632:27317:9471 1:N:0:GAACCTAG+TCCGCATA  
CACAGCCTTACAGCTGTGGAGCACGGTATCCTCTGCCGAAACAGAGGTTGGACAAGACCGGAGGGGTC  
TCCTAGTTCCAAAGGAGATGTACTCCGGGCTTGTTACGACCTACCGTGTAAGTCGTAGTCTAGTAGG  
+



FFFFFFFFFFFFFFFFFFFFFFFFFFFFFFFFFFFFFFFFFFFFFFFFFFFFFFFFFFFFFFFFFFFFFFFF  
FFFFFFFFFFFFFFFFFFFFFFFFFFFFFFFFFFFFFFFFFFFFFFFFFFFFFFFFFFFFFFFFFFFFFFFF  
@A00155:342:HHGFNDSXY:1:1632:20735:26506 1:N:0:GAACCTAG+TCCGCATA  
AGAGAGAGCGACTTCTCTCGGGCCCACAGCCTTACAGCTGTGGAGCACGGTATCCTCTGCCGAAACAG  
AGGTTGGACAAGACCGGAGGGGTCTTCTAGTTCCAAAGGAGATGTACTCCGGGCTTGTTACGACCTA  
+  
FFFFFFFFFFFFFFFFFFFFFFFFFFFFFFFFFFFFFFFFFFFFFFFFFFFFFFFFFFFFFFFFFFFFFFFF  
FFFFFFFFFFFFFFFFFFFFFFFFFFFFFFFFFFFFFFFFFFFFFFFFFFFFFFFFFFFFFFFFFFFFFFFF:  
@A00155:342:HHGFNDSXY:1:1633:29351:18349 1:N:0:GAACCTAG+TCCGCATA  
GGGCGAGAGAGAGCGACTTCTCTCGGGCCCACAGCCTTACAGCTGTGGAGCACGGTATCCTCTGCCGA  
AACAGAGGTTGGACAAGACCGGAGGGGTCTCCTAGTTCCAAAGGAGATGTACTCCGGGCTTGTTACG  
+  
FFFFFFFFFFFFFFFFFFFFFFFFFFFFFFFFFFFFFFFFFFFFFFFFFFFFFFFFFFFFFFFFFFFFFFFF:  
FFFFFFFFFFFFFFFFFFFFFFFFFFFFFFFFFFFFFFFFFFFFFFFFFFFFFFFFFFFFFFFFFFFFFFFF:  
@A00155:342:HHGFNDSXY:1:1633:22842:22169 1:N:0:GAACCTAG+TCCGCATA  
CGAGAGAGAGCGACTTCTCTCGGGCCCACAGCCTTACAGCTGTGGAGCACGGTATCCTCTGCCGAAAC  
AGAGGTTGGACAAGACCGGAGGGGTCTCCTAGTTCCAAAGGAGATGTACTCCGGGCTTGTTACGACC  
+  
FFFFFFFFFFFFFFFFFFFFFFFFFFFFFFFFFFFFFFFFFFFFFFFFFFFFFFFFFFFFFFFFFFFFFFFF:  
FFFFFFFFFFFFFFFFFFFFFFFFFFFFFFFFFFFFFFFFFFFFFFFFFFFFFFFFFFFFFFFFFFFFFFFF:  
@A00155:342:HHGFNDSXY:1:1633:30942:24925 1:N:0:GAACCTAG+TCCGCATA  
CTCAATGCCGAGAGGGATGTGGAGGGCGAGAGAGAGCGACTTCTCTCGGGCCCACAGCCTTACAGCTG  
TGGAGCACGGTATCCTCTGCCGAAACAGAGGTTGGACAAGACCGGAGGGGTCTCCTGGTTCCAAAGGA  
+  
FFFFFFFFFFFFFFFFFFFFFFFFFFFFFFFFFFFFFFFFFFFFFFFFFFFFFFFFFFFFFFFFFFFFFFFF:  
FFFFFFFFFFFFFFFFFFFFFFFFFFFFFFFFFFFFFFFFFFFFFFFFFFFFFFFFFFFFFFFFFFFFFFFF:  
@A00155:342:HHGFNDSXY:1:1634:20835:1094 1:N:0:GAACCTAG+TCCGCATA  
GACTTCTCTCGGGCCCACAGCCTTACAGCTGTGGAGCACGGTATCCTCTGCCGAAACAGAGGTTGGAC  
AAGACCGGAGGGGTCTCCTGGTTCCAAAGGAGATGTACTCCGGGCTTGTTACGACCTACCGTGTAAG  
+  
FFFFFFFFFFFFFFFFFFFFFFFFFFFFFFFFFFFFFFFFFFFFFFFFFFFFFFFFFFFFFFFFFFFFFFFF:  
FFFFFFFFFFFFFFFFFFFFFFFFFFFFFFFFFFFFFFFFFFFFFFFFFFFFFFFFFFFFFFFFFFFFFFFF:  
@A00155:342:HHGFNDSXY:1:1634:29451:10786 1:N:0:GAACCTAG+TCCGCATA  
GAGCGACTTCTCTCGGGCCCACAGCCTTACAGCTGTGGAGCACGGTATCCTCTGCCGAAACAGAGGTT  
GGACAAGACCGGAGGGGTCTCCTAGTTCCAAAGGAGATGTACTCCGGGCTTGTTACGACCTACCGTG  
+  
FFFFFFFFFFFFFFFFFFFFFFFFFFFFFFFFFFFFFFFFFFFFFFFFFFFFFFFFFFFFFFFFFFFFFFFF:  
FFFFFFFFFFFFFFFFFFFFFFFFFFFFFFFFFFFFFFFFFFFFFFFFFFFFFFFFFFFFFFFFFFFFFFFF:  
@A00155:342:HHGFNDSXY:1:1634:3947:33348 1:N:0:GAACCTAG+TCCGCATA  
GTCCACTTAAGGACTCACCTCTGGCCTATGGTCATCTCAATGCCGAGAGGGATGTGGAGGGCGAGAGA  
GAGCGACTTCTCTCGGGCCCACAGCCTTACAGCTGTGGAGCACGGTATCCTCTGCCGAAACAGAGGTT  
+  
FFFFFFFFFFFFFFFFFFFFFFFFFFFFFFFFFFFFFFFFFFFFFFFFFFFFFFFFFFFFFFFFFFFFFFFF:  
FFFFFFFFFFFFFFFFFFFFFFFFFFFFFFFFFFFFFFFFFFFFFFFFFFFFFFFFFFFFFFFFFFFFFFFF:  
@A00155:342:HHGFNDSXY:1:1635:17788:13009 1:N:0:GAACCTAG+TCCGCATA  
AAGGACTCACCTCTGGCCTATGGTCATCTCAATGCCGAGAGGGATGTAGAGGGCGAGAGAGAGCGACT  
TCTCTCGGGCCCACAGCCTTACAGCTGTGGAGCACGGTATCCTCTGCCGAAACAGAGGTTGGACAAGA  
+  
FFFFFFFFFFFFFFFFFFFFFFFFFFFFFFFFFFFFFFFFFFFFFFFFFFFFFFFFFFFFFFFFFFFFFFFF:  
FFFFFFFFFFFFFFFFFFFFFFFFFFFFFFFFFFFFFFFFFFFFFFFFFFFFFFFFFFFFFFFFFFFFFFFF:  
@A00155:342:HHGFNDSXY:1:1635:11062:21997 1:N:0:GAACCTAG+TCCGCATA  
GTCATCTCAATGCCGAGAGGGATGTGGAGGGCGAGAGAGAGCGACTTCTCTCGGGCCCACAGCCTTAC  
AGCTGTGGAGCACGGTATCCTCTGCCGAAACAGAGGTTGGACAAGACCGGAGGGGTCTCCTAGTTCCA  
+

FFFFFFFFF:F:FFF:F::FF,FFFFFFFFFFFFFFFFFFFFFFF::FFFFFFFFFFFFFFFFFFFFFFF  
FFFFFFFFFFFFFFFFF:FFFFFF:FFF,FFFFF:FF:FFFFFFFFFFFFFFFFFFFFFFFFFFFFFFFFF  
@A00155:342:HHGFNDSXY:1:1635:31439:28980 1:N:0:GAACCTAG+TCCGCATA  
AGAGCGACTTCTCTCGGGCCACAGCCTTACAGCTGTGGAGCACGGTATCCTCTGCCGAAACAGAGGT  
TGGACAAGACCGGAGGGGTCTCTGGTTCCAAAGGAGATGTACTCCGGGCTTGTTCACGAC  
+  
FFFFFFFFFFFFFFFFFFFFFFFFFFFFFFFFF:FFFFFFFFFFFFFFFFFFFFFFFFFFFFFFFFF  
FFFFFFF:FFFFFFFFFFFFFFFFFFFFFFFFFFFFFFFFF:FFFFFFFFFFFFFFFFFFFFFFF  
@A00155:342:HHGFNDSXY:1:1635:15691:36057 1:N:0:GAACCTAG+TCCGCATA  
TGTGTCCACTTAAGGACTCACCTCTGGCCTATGGTCATCTCAATGCCGAGAGGGATGTGAAGGGCGAG  
AGAGAGCGACTTCTCTCGGGCCACAGCCTTACAGCTGTGGAGCACGGTATCCTCTGCCGAAACAGAG  
+  
FFFFFFFFFFFFFFFFFFFFFFFFFFFFFFFFF:FFFFFFF,FF::F,FFFFFFF,FFFFFFFFFFFFFFF  
FFFFFFFFFFFFFFFFFFFFFFFFFFFFFFF,F:FFFF,FFFFF:FFFFFFFFF:F,F:F:FFFFFFFFF::F:  
@A00155:342:HHGFNDSXY:1:1636:20980:16031 1:N:0:GAACCTAG+TCCGCATA  
AGACTCACCTCTGGCCTATGGTCATCTCAATGCCGAGAGGGATGTGGAGGGCGAGAGAGAGCGACTTC  
TCTCGGGCCACAGCCTTACAGCTGTGGAGCACGGTATCCTCTGCCGAAACAGAGGTTGGACAAGACC  
+  
FFFFFFFFFFFFFFFFFFFFFFFFFFFFFFFFF:FFFFFFFFFFFFFFFFFFFFFFFFFFFFFFFFF:FF  
FFFFFFFFFFFFFFFFFFFFFFFFFFFFFFFFF:FFFFFFF:FFFFFFFFFFFFFFFFFFFFFFF  
@A00155:342:HHGFNDSXY:1:1636:2889:22310 1:N:0:GAACCTAG+TCCGCATA  
TCCTCTGCCGAAACAGAGGTTGGACAAGACCGGAGGGGTCTCCTAGTTCCAAAGGAGATGTACTCCGG  
GCTTGTTCACGACCTACCGTGTAAGTCGTAGTCTAGTAGGCTACCTGACGAGTCCTTTTAGGACGAA  
+  
FFFFFFFFFFFFFFFFFFFFFFFFFFFFFFFFF:FFFFFFFFFFFFFFFFFFFFFFFFFFFFFFFFF  
FFFFFFFFFFFFFFFFFFFFFFFFFFFFFFFFF:FFFFFFFFFFFFFFFFFFFFFFFFFFFFFFFFF  
@A00155:342:HHGFNDSXY:1:1636:24532:22748 1:N:0:GAACCTAG+TCCGCATA  
GAGGGCGAGAGAGAGCGACTTCTCTCGGGCCACAGCCTTACAGCTGTGGAGCACGGTATCCTCTGCC  
GAAACAGAGGTTGGACAAGACCGGAGGGGTCTCCTAGTTCCAAAGGAGATGTACTCCGGGCTTGTTC  
+  
FFFFFFFFFFFFFFFFFFFFFFFFFFFFFFFFF:FFFFFFFFF  
FFFFFFFFFFFFFFFFFFFFFFFFFFFFFFFFF:FFFFFFFFFFFFFFFFFFFFFFFFFFFFFFFFF  
@A00155:342:HHGFNDSXY:1:1636:22797:28260 1:N:0:GAACCTAG+TCCGCATA  
ACCTCTGTTTCGGCAGAGGATACCGTGCTCCACAGCTGTAAGGCTGTGGGCCCGAGAGAAGTCGCTCT  
CTCTCGCCCTCCACATCCCTCTCGGTATTGAGATGACCATAGGCCAGAGGTGAGTCCTTAAGTGGACA  
+  
FFFFFFFFFFFFFFFFFFFFFFFFFFFFFFFFF:FFFFFFF  
FFFFFFFFFFFFFFFFFFFFFFFFFFFFFFFFF:FFFFFFFFFFFFFFFFFFFFFFFFFFFFFFFFF:  
@A00155:342:HHGFNDSXY:1:1637:22761:1861 1:N:0:GAACCTAG+TCCGCATA  
TGTTTCGGCAGAGGATACCGTGCTCCACAGCTGTAAGGCTGTGGGCCCGAGAGAAGTCGCTCTCTCTC  
GCCCTTCACATCCCTCTCGGCATTGAGATGACCATAGGCCAGAGGTGAGTCCTTAAGTGGACACAGCT  
+  
FFFFFFFFFFFFFFFFFFFFFFFFFFFFFFFFF:FFFFFFFFFFFFFFFFFFFFFFFFFFFFFFFFF  
FFFFFFFFFFFFFFFFFFFFFFFFFFFFFFFFF:FFFFFFFFFFFFFFFFFFFFFFFFFFFFFFFFF  
@A00155:342:HHGFNDSXY:1:1637:27606:4492 1:N:0:GAACCTAG+TCCGCATA  
CCCACAGCCTTACAGCTGTGGAGCACGGTATCCTCTGCCGAAACAGAGGTTGGACAAGACCGGAGGGG  
TCTCCTAGTTCCAAAGGAGATGTACTCCGGGCTTGTTCACGACCTACCGTGTAAGTCGTAGTCTAGTA  
+  
FFFFFFFFFFFFFFFFFFFFFFFFFFFFFFFFF:FFFFFFFFFFFFFFFFFFFFFFFFFFFFFFFFF  
FFFFFFFFFFFFFFFFFFFFFFFFFFFFFFFFF:FFF:FFFFFFFFFFFFFFFFFFFFFFF  
@A00155:342:HHGFNDSXY:1:1637:29731:13244 1:N:0:GAACCTAG+TCCGCATA  
CTCAATGCCGAGAGGGATGTGGAGGGCGAGAGAGAGCGACTTCTCTCGGGCCACAGCCTTACAGCTG  
TGGAGCACGGTATCCTCTGCCGAAACAGAGGTTGGACAAGACCGGAGGGGTCTCCTAGTTCCAAAGGA  
+

[illegible]

FFFFFFFFFFFF:FFFFFFFFFFFF:FFFFFFFFFFFF,FFFFFFFFFFFF  
F:FFFFFFFFFFFF,FFFFFFFFFFFF:FFFF  
@A00155:342:HHGFNDSXY:1:1639:4851:16407 1:N:0:GAACCTAG+TCCGCATA  
TTAAGGACTCACCTCTGGCCTATGGTCATCTCAATGCCGAGAGGGATGTGGGGGGCGAGAGAGCGA  
CTTCTCTCGGGCCCACAGCCTTACAGCTGTGGAGCACGGTATCCTCTGCCGAAACAGAGG  
+  
FFFFFFFFFFFFFFFFFFFFFFFFFFFFFFFFFFFFFFFFFFFFFFFFFFFFFFFFFFFF:FFFF  
FFFFFFFFFFFFFFFFFFFFFFFF,FFFFFFFFFFFF:FFFFFFFFFFFFFFFF  
@A00155:342:HHGFNDSXY:1:1639:28673:16517 1:N:0:GAACCTAG+TCCGCATA  
GCGACTTCTCTCGGGCCCACAGCCTTACAGCTGTGGAGCACGGTATCCTCTGCCGAAACAGAGGTTGG  
ACAAGACCGGAGGGGTCTCCTAGTTCCAAAGGAGATGTACTCCGGGCTTGTTACGACCTACCGTGTA  
+  
FFFFFFFFFFFFFFFFFFFFFFFFFFFFFFFFFFFFFFFFFFFFFFFFFFFFFFFFFFFF  
FFFFFFFFFFFFFFFFFFFFFFFFFFFFFFFFFFFFFFFFFFFFFFFFFFFFFFFFFFFF  
@A00155:342:HHGFNDSXY:1:1639:17607:21339 1:N:0:GAACCTAG+TCCGCATA  
TCTGTTTCGGCAGAGGATACCGTGCTCCACAGCTGTAAGGCTGTGGGCCCAGAGAAGTCGCTCTCTC  
TCGCCCTTACATCCCTCTCGGCATTGAGATGACCATAGGCCAGAGGTGAGTCCTTAAGTGACACAG  
+  
FFFFFFFFFFFFFFFFFFFFFFFFFFFFFFFFFFFFFFFFFFFFFFFFFFFFFFFFFFFF  
FFFFFFFFFFFFFFFFFFFFFFFF:FFFFFFFFFFFF,FFFFFFFFFFFFFFFF  
@A00155:342:HHGFNDSXY:1:1639:8350:25692 1:N:0:GAACCTAG+TCCGCATA  
AAGGACTCACCTCTGGCCTATGGTCATCTCAATGCCGAGAGGGATGTAGAGGGCGAGAGAGCGACT  
TCTCTCGGGCCCACAGCCTTACAGCTGTGGAGCACGGTATCCTCTGCCGAAACAGAGGTTGGACAAGA  
+  
FFFFFFFFFFFFFFFFFFFFFFFFFFFFFFFFFFFFFFFFFFFFFFFFFFFFFFFFFFFF  
FFFFFFFFFFFFFFFFFFFFFFFFFFFFFFFFFFFFFFFFFFFFFFFFFFFFFFFFFFFF  
@A00155:342:HHGFNDSXY:1:1639:29523:28635 1:N:0:GAACCTAG+TCCGCATA  
TCTCTCGGGCCCACAGCCTTACAGCTGTGGAGCACGGTATCCTCTGCCGAAACAGAGGTTGGACAAGA  
CCGAGAGGGTCTCCTAGTTCCAAAGGAGATGTACTCCGGGCTTGTTACGACCTACCGTGTAAGTCGT  
+  
FFF,FFFFFFFFFFFFFFFFFFFF,F:, ,FFFFFFFF:FFFFFFFFFFFFFFFF  
FFFFFFFFFFFFFFFFFFFFFFFFFFFFFFFFFFFFFFFF:FFF,FFFFFFFFFFFFFFFF  
@A00155:342:HHGFNDSXY:1:1639:6135:29778 1:N:0:GAACCTAG+TCCGCATA  
TTAAGGACTCACCTCTGGCCTATGGTCATCTCAATGCCGAGAGGGATGTGGAGGGCGAGAGAGCGA  
CTTCTCTCGGGCCCACAGCCTTACAGCTGTGGAGCACGGTATCCTCTGCCGAAACAGAGG  
+  
FFFFFFFFFFFFFFFF:FFFFFFFFFFFFFFFFFFFFFFFF:FFFFFFFFFFFFFFFF  
FFFFFFFFFFFFFFFFFFFFFFFFFFFFFFFFFFFFFFFF,FFFFFFFFFFFFFFFF  
@A00155:342:HHGFNDSXY:1:1640:10583:3286 1:N:0:GAACCTAG+TCCGCATA  
ATCTCAATGCCGAGAGGGATGTAGAGGGCGAGAGAGAGCGACTTCTCTCGGGCCCACAGCCTTACAGC  
TGTGGAGCACGGTATCCTCTGCCGAAACAGAGGTTGGACAAGACCGGAGGGGTCTCCTAGTTCCAAAG  
+  
FFFFFFFFFFFFFFFFFFFFFFFFFFFFFFFFFFFFFFFFFFFFFFFFFFFFFFFFFFFF  
FFFFFFFFFFFFFFFFFFFFFFFFFFFFFFFFFFFFFFFFFFFFFFFFFFFFFFFFFFFF  
@A00155:342:HHGFNDSXY:1:1640:19623:10426 1:N:0:GAACCTAG+TCCGCATA  
AGAGAGAGCGACTTCTCTCGGGCCCACAGCCTTACAGCTGTGGAGCACGGTATCCTCTGCCGAAACAG  
AGGTTGGACAAGACCGGAGGGGTCTCCTAGTTCCAAAGGAGATGTACTCCGGGCTTGTTACGACCTA  
+  
FFFFFFFFFFFFFFFFFFFFFFFFFFFFFFFFFFFFFFFF:FFFFFFFFFFFF:FFFFFFFF  
FFFFF:FFFFF:F:FFFF:FFFFFFFF:FFF::FFFF:FFFF:FFFF:F:FF,FFFFFFFF  
@A00155:342:HHGFNDSXY:1:1640:25889:15107 1:N:0:GAACCTAG+TCCGCATA  
GCTGTGTCCACTTAAGGACTCACCTCTGGCCTATGGTCATCTCAATGCCGAGAGGGATGTAGAGGGCG  
AGAGAGAGCGACTTCTCTCGGGCCCACAGCCTTACAGCTGTGGAGCACGGTATCCTCTGCCGAAACAG  
+

FFFFFFFFFFFFFFFF:FFFFFFFFFFFFFFFFFFFFFFFFFFFFFFFFFFFFFFFFFFFFFFFF  
FFFFFFFFFFFFFFFFFFFFFFFFFFFFFFFFFFFFFFFFFFFFFFFFFFFFFFFFFFFFFFFF  
@A00155:342:HHGFNDSXY:1:1640:3721:28510 1:N:0:GAACCTAG+TCCGCATA  
TGGTCATCTCAATGCCGAGAGGGATGTGGAGGGCGAGAGAGCGACTTCTCTCGGGCCCCACAGCCTT  
ACAGCTGTGGAGCACGGTATCCTCTGCCGAAACAGAGGTTGGACAAGACCGGAGGGGTC  
+  
FFFFFFFFFFFFFFFFFFFFFF:FFF:FFFFFFFFFFFFFFFFFFFFFFFFFFFFFFFF:FFFFFFFFFFFFFFFFFFFFFF  
FFFFFFFFFFFFFFFFFFFFFF,FFFFFFFFFFFFFFFFFFFFFFFFFFFFFFFFFFFFFFFFFFFFFFFF  
@A00155:342:HHGFNDSXY:1:1640:6903:32174 1:N:0:GAACCTAG+TCCGCATA  
ACTTCTCTCGGGCCCCACAGCCTTACAGCTGTGGAGCACGGTATCCTCTGCCGAAACAGAGGTTGGACA  
AGACCGGAGGGGTCTCCTGTTCCAAAGGAGATGTACTCCGGGCTTGTTACGACCTACCGTGTAAG  
+  
FFFFFFFFFFFFFFFFFFFFFFFFFFFFFFFFFFFFFFFFFFFFFFFFFFFFFFFFFFFFFFFF,FFFFFFFFFFFFFFFFFFFFFFFFFFFFFFFF  
FFFFFFFFFFFFFFFFFFFFFFFFFFFFFFFFFFFFFFFFFFFFFFFFFFFFFFFFFFFFFFFFFFFFFFFF:FF:FF  
@A00155:342:HHGFNDSXY:1:1641:7392:4335 1:N:0:GAACCTAG+TCCGCATA  
CTCTGCCGAAACAGAGGTTGGACAAGACCGGAGGGGTCTCCTAGTTCCAAAGGAGATGTACTCCGGGC  
TTGTTACGACCTACCGTGTAAGTCGTAGTCTAGTAGGCTACCTGACGAGTCTTTTTTAGGACGAAAC  
+  
FFFFFFFFFFFFFFFFFFFFFFFFFFFFFFFFFFFFFFFFFFFFFFFFFFFFFFFFFFFFFFFF,FFFFFFFFFFFFFFFFFFFFFFFFFFFFFFFF  
FFFFFFFFFFFFFFFFFFFFFFFFFFFFFFFFFFFFFFFFFFFFFFFFFFFFFFFFFFFFFFFFFFFFFFFF:FFFFFFFFFFFFFFFFFFFFFFFF  
@A00155:342:HHGFNDSXY:1:1641:3676:33379 1:N:0:GAACCTAG+TCCGCATA  
CTTCTCTCGGGCCCCACAGCCTTACAGCTGTGGAGCACGGTATCCTCTGCCGAAACAGAGGTTGGACAA  
GACCGGAGGGGTCTCCTAGTTCCAAAGGAGATGTACTCCGGGCTTGTTACGACCTACCGTGTAAGTC  
+  
FFFFFFFFFFFFFFFFFFFFFFFFFFFFFFFFFFFFFFFFFFFFFFFFFFFFFFFFFFFFFFFF:FFFFFFFFFFFFFFFFFFFFFFFFFFFFFFFF  
FFFFFFFFFFFFFFFFFFFFFFFFFFFFFFFFFFFFFFFFFFFFFFFFFFFFFFFFFFFFFFFFFFFFFFFF,FFF  
@A00155:342:HHGFNDSXY:1:1642:7292:9956 1:N:0:GAACCTAG+TCCGCATA  
TTACAGCTGTGGAGCACGGTATCCTCTGCCGAAACAGAGGTTGGACAAGACCGGAGGGGTCTCCTAGT  
TCCAAAGGAGATGTACTCCGGGCTTGTTACGACCTACCGTGTAAGTCGTAGTCTAGTAGGCTACCTG  
+  
FFFFFFFFF:FFFFFFFFFFFFFFFFFFFFFF,FFFFFFFFFFF:FFFFFFFFFFFFFFFFFFFFFFFFFFFFFFFFFFFFFFFF  
FFFFFFFFFFFFFFFFFFFFFFFFFFFFFFFF:F:FFFFFFFFFFFFFFFFFFFFFFFFFFFFFFFFFFFFFFFF:FFFFFFFFF  
@A00155:342:HHGFNDSXY:1:1642:10393:11663 1:N:0:GAACCTAG+TCCGCATA  
TCTCTCGGGCCCCACAGCCTTACAGCTGTGGAGCACGGTATCCTCTGCCGAAACAGAGGTTGGACAAGA  
CCGGAGGGGTCTCCTAGTTCCAAAGGAGATGTACTCCGGGCTTGTTACGACCTACCGTGTAAGTCGT  
+  
FFFFFFFFFFFFFFFFFFFFFFFFFFFFFFFFFFFFFFFFFFFFFFFFFFFFFFFFFFFFFFFFFFFFFFFF:FFFFFFFF  
FFFFFFFFFFFFFFFFFFFFFFFFFFFFFFFFFFFFFFFFFFFFFFFFFFFFFFFFFFFFFFFFFFFFFFFF  
@A00155:342:HHGFNDSXY:1:1642:16604:12524 1:N:0:GAACCTAG+TCCGCATA  
CTTACAGCTGTGGAGCACGGTATCCTCTGCCGAAACAGAGGTTGGACAAGACCGGAGGGGTCTCCTAG  
TTCCAAAGGAGATGTACTCCGGGCTTGTTACGACCTACCGTGTAAGTCGTAGTCTAGTAGGCTACCT  
+  
FFFFFFFFFFFFFFFFFFFFFFFFFFFFFFFFFFFFFFFFFFFFFFFFFFFFFFFFFFFFFFFFFFFFFFFF,FF  
FFFFFFFFFFFFFF:FFFFFFFFFFFFFFFFFFFFFFFFFFFFFFFFFFFFFFFFFFFFFFFFFFFFFFFF  
@A00155:342:HHGFNDSXY:1:1642:13105:14043 1:N:0:GAACCTAG+TCCGCATA  
GAGAGGGATGTGGAGGGCGAGAGAGAGCGACTTCTCTCGGGCCCCACAGCCTTACAGCTGTGGAGCACG  
GTATCCTCTGCCGAAACAGAGGTTGGACAAGACCGGAGGGGTCTCCTAGTTCCAAAGGAGATGTACTC  
+  
FFFFFFF:FFFFFFFFFFFFFFFFFFFFFFFFFFFFFFFFFFFFFFFFFFFFFFFFFFFFFFFF:FFFFFFF  
FFFFFFFFF::FF:FFFFFF:FFFFFFFF:FFFFFFFFFFFFFFFFFFFFFFFFFFFFFFFF  
@A00155:342:HHGFNDSXY:1:1642:4426:23062 1:N:0:GAACCTAG+TCCGCATA  
AGAAGTCGCTCTCTCTCGCCCTCCACATCCCTCTCGGCATTGAGATGACCATAGGCCAGAGGTGAGTC  
CTTAAGTGACACAGCTGATCTAAGGCGGTGTGGCGGGGCATGGGTTTGAACCCCATGACGGTCGGA  
+

FFFFFFFFFFFFFFFFFFFFFFFFFFFFFFFFFFFFFFFFFFFFFFFFFFFFFFFFFFFFFFFFFFFFFFFF  
FFFFFFFFFFFFFFFFFFFFFFFFFFFFFFFFFFFFFFFFFFFFFFFFFFFFFFFFFFFFFFFFFFFFFFFF  
@A00155:342:HHGFNDSXY:1:1642:22923:34178 1:N:0:GAACCTAG+TCCGCATA  
GGATGTAGAGGGCGAGAGAGAGCGACTTCTCTCGGGCCACAGCCTTACAGCTGTGGAGCACGGTATC  
CTCTGCCGAAACAGAGGTTGGACAAGACCGGAGGGGTCTCCTAGTTCCAAAGGAGATGTACTCCGGGC  
+  
FFFFFFFFFFFFFFFFFFFFFFFFFFFFFFFFFFFFFFFFFFFFFFFFFFFFFFFFFFFFFFFFFFFFFFFF  
FFFFFFFFFFFFFFFFFFFFFFFFFFFFFFFFFFFFFFFFFFFFFFFFFFFFFFFFFFFFFFFFFFFFFFFF:  
@A00155:342:HHGFNDSXY:1:1643:5801:3834 1:N:0:GAACCTAG+TCCGCATA  
GAGCGACTTCTCTCGGGCCACAGCCTTACAGCTGTGGAGCACGGTATCCTCTGCCGAAACAGAGGTT  
GGACAAGACCGGAGGGGTCTCCTAGTTCCAAAGGAGATGTACTCCGGGCTTGTTACGACCTACCGTG  
+  
FFFFFFFFFFFFFFFFFFFFFFFFFFFFFFFFFFFFFFFFFFFFFFFFFFFFFFFFFFFFFFFFFFFFFFFF  
FFFFFFFFFFFFFFFFFFFFFFFFFFFFFFFFFFFFFFFFFFFFFFFFFFFFFFFFFFFFFFFFFFFFFFFF:  
@A00155:342:HHGFNDSXY:1:1643:32154:12680 1:N:0:GAACCTAG+TCCGCATA  
AGGGATGTGGAGGGCGAGAGAGAGCGACTTCTCTCGGGCCACAGCCTTACAGCTGTGGAGCACGGTA  
TCCTCTGCCGAAACAGAGGTTGGACAAGACCGGAGGGGTCTCCTGGTTCCAAAGGAGATGTACTCCGG  
+  
FFFFFFFFFFFFFFFFFFFFFFFFFFFFFFFFFFFFFFFFFFFFFFFFFFFFFFFFFFFFFFFFFFFFFFFF,F,FFFFFFFFFFFFFF:FFFFF  
FFFFFFFFFFFFFFFFFFFFFFFFFFFFFFFFFFFFFFFFFFFFFFFFFFFFFFFFFFFFFFFFFFFFFFFF:FFFFF  
@A00155:342:HHGFNDSXY:1:1643:14669:32002 1:N:0:GAACCTAG+TCCGCATA  
GAGCGACTTCTCTCGGGCCACAGCCTTACAGCTGTGGAGCACGGTATCCTCTGCCGAAACAGAGGTT  
GGACAAGACCGGAGGGGTCTCCTAGTTCCAAAGGAGATGTACTCCGGGCTTGTTACGACCTACCGTG  
+  
FFFFFFFFFFFFFFFFFFFFFFFFFFFFFFFFFFFFFFFFFFFFFFFFFFFFFFFFFFFFFFFFFFFFFFFF  
FFFFFFFFFFFFFFFFFFFFFFFFFFFFFFFFFFFFFFFFFFFFFFFFFFFFFFFFFFFFFFFFFFFFFFFF  
@A00155:342:HHGFNDSXY:1:1644:8278:7623 1:N:0:GAACCTAG+TCCGCATA  
TGTAGAGGGCGAGAGAGAGCGACTTCTCTCGGGCCACAGCCTTACAGCTGTGGAGCACGGTATCCTC  
TGCCGAAACAGAGGTTGGACAAGACCGGAGGGGTCTCCTAGTTCCAAAGGAGATGTACTCCGGG  
+  
FFFFFFFFFFFFFFFFFFFFFFFFFFFFFFFFFFFFFFFFFFFFFFFFFFFFFFFFFFFFFFFFFFFFFFFF  
FFFFFFFFFFFFFFFFFFFFFFFFFFFFFFFFFFFFFFFFFFFFFFFFFFFFFFFFFFFFFFFFFFFFFFFF  
@A00155:342:HHGFNDSXY:1:1644:18439:12759 1:N:0:GAACCTAG+TCCGCATA  
AAGGACTCTCCTCTGGCCTATGGTCATCTCAATGCCGAGAGGGATGTGGAGGGCGAGAGAGAGCGACT  
TCTCTCGGGCCACAGCCTTACAGCTGTGGAGCACGGTATCCTCTGCCGAAACAGAGGTTGGACAAGA  
+  
FFFFFFFFFFFFFFFFFFFFFFFFFFFFFFFFFFFFFFFFFFFFFFFFFFFFFFFFFFFFFFFFFFFFFFFF  
FFFFFFFFFFFFFFFFFFFFFFFFFFFFFFFFFFFFFFFFFFFFFFFFFFFFFFFFFFFFFFFFFFFFFFFF:  
@A00155:342:HHGFNDSXY:1:1644:27832:20509 1:N:0:GAACCTAG+TCCGCATA  
GAGCGACTTCTCTCGGGCCACAGCCTTACAGCTGTGGAGCACGGTATCCTCTGCCGAAACAGAGGTT  
GGACAAGACCGGAGGGGTCTCCTAGTTCCAAAAGAGATGTACTCCGGGCTTGTTACGACCTACCGTG  
+  
FFFFFFFFFFFFFFFFFFFFFFFFFFFFFFFFFFFFFFFFFFFFFFFFFFFFFFFFFFFFFFFFFFFFFFFF  
FFFFFFFFFFFFFFFFFFFFFFFFFFFFFFFFFFFFFFFFFFFFFFFFFFFFFFFFFFFFFFFFFFFFFFFF  
@A00155:342:HHGFNDSXY:1:1644:3712:33379 1:N:0:GAACCTAG+TCCGCATA  
GAGCGACATCTCTCGGGCCACAGCCTTACAGCTGTGGAGCACGGTATCCTCTGCCGAAACAGAGGTT  
GGACAAGACCGGAGGGGTCTCCTAGTTCCAAAGGAGATGTACTCCGGGCTTGTTACGACCTACCGTG  
+  
FFFFFFFFFFFFFFFFFFFFFFFFFFFFFFFF,F,FFFFFFFF:FFFFFFFFFFFFFFFF:FFFFF  
FFFFFFFFFFFFFFFFFFFFFFFFFFFFFFFFFFFFFFFFFFFFFFFFFFFFFFFFFFFFFFFFFFFFFFFF  
@A00155:342:HHGFNDSXY:1:1644:10854:36417 1:N:0:GAACCTAG+TCCGCATA  
GTCATCTCAATGCCGAGAGGGATGTGGAGGGCGAGAGAGAGCGACTTCTCTCGGGCCACAGCCTTAC  
AGCTGTGGAGCACGGTATCCTCTGCCGAAACAGAGGTTGGACAAGACCGGAGGGGTCTCCTAGTTCCA  
+

FFFFFFFFFFFFFFFFFFFFFFFFFFFFFFFFFFFFFFFFFFFFFFFFFFFFFFFFFFFFFFFFFFFFFFFF  
FFFFFFFFFFFFFFFFFFFFFFFFFFFFFFFFFFFFFFFFFFFFFFFFFFFFFFFFFFFFFFFFFFFFFFFF:FFFFFFFFFFFF:FFFFFFFF  
@A00155:342:HHGFNDSXY:1:1645:6271:5619 1:N:0:GAACCTAG+TCCGCATA  
TAAGTGGACACAGCTGATCTAAGGCGGTGTGGCGGGCATGGGTTTGAACCCCATGACGGTCGGAGT  
CTAGTAGGCTCCCTGATGAGTCCGTTCCAAGGACGAAACCGTCGTTACTCTTTGAGTTGTGTAAGTTT  
+  
FFFFFFFFFFFFFFFFFFFFFFFFFFFF,FFFFFF,FFFFFFFFFFFFFFFFFFFFFFFFFFFF:FFFFFFFFFFFFFFFFFFFF  
FFFFFFFFFFFFFFFFFFFFFFFFFFFFFFFFFFFFFFFFFFFFFFFFFFFFFFFFFFFFFFFFFFFFFFFF,FFFFFFFFFFFFFFFFFFFF  
@A00155:342:HHGFNDSXY:1:1645:12048:16971 1:N:0:GAACCTAG+TCCGCATA  
GGGCGAGAGAGAGCGACTTCTCTCGGGCCACAGCCTTACAGCTGTGGAGCACGGTATCCTCTGCCGA  
AACAGAGGTTGGACAAGACCGGAGGGGTCTCCTAGTTCCAAAGGAGATGTACTCCGGGCTTGTTACAG  
+  
F:FF,F,FFFFFFFFFFFFFFFFFFFF,FFFFFFFFFFFF,FF:F::FFF:FFFFFFFFFFFFFFFFFFFF:FFFFFFF  
FFFFFFFFFFFF:FFFFFFFFFFFFFFFFFFFF:FFFFFFF,FFFF:FFFFFFFFFFFFFFFFFFFF:F:FFF:,FFFFF  
@A00155:342:HHGFNDSXY:1:1645:18078:24471 1:N:0:GAACCTAG+TCCGCATA  
GTCATCTCAATGCCGAGAGGGATGTGGAGGGCGAGAGAGAGCGACTTCTCTCGGGCCACAGCCTTAC  
AGCTGTGGAGCACGGTATCCTCTGCCGAAACAGAGGTTGGACAAGACCGGAGGGGTCTCCTGGTTCCA  
+  
FFFFFFFFFFFFFFFFFFFFFFFFFFFFFFFFFFFFFFFFFFFFFFFFFFFFFFFFFFFFFFFFFFFFFFFF  
FFFFFFFFFFFFFFFFFFFFFFFFFFFFFFFFFFFFFFFFFFFFFFFFFFFFFFFFFFFFFFFFFFFFFFFF:FFFFFFFFFFFFFFFF:F  
@A00155:342:HHGFNDSXY:1:1645:10140:26663 1:N:0:GAACCTAG+TCCGCATA  
TCTTGTTCAACCTCTGTTTCGGCAGAGGATACCGTGCTCCACAGCTGTAAGGCTGTGGGCCCCGAGAGA  
AGTCGCTCTCTCTCGCCCTTACATCCCTCTCGGCATTGAGATGACCATAGGCCAGAGGTGAGTCCTT  
+  
FFFFFFFFFFFFFFFFFFFFFFFFFFFFFFFFFFFFFFFFFFFFFFFFFFFFFFFFFFFFFFFFFFFFFFFF  
FFFFFFFFFFFFFFFFFFFFFFFFFFFFFFFFFFFFFFFFFFFFFFFFFFFFFFFFFFFFFFFFFFFFFFFF  
@A00155:342:HHGFNDSXY:1:1646:11605:2895 1:N:0:GAACCTAG+TCCGCATA  
GATGTAGAGGGCGAGAGAGAGCGACTTCTCTCGGGCCACAGCCTTACAGCTGTGGAGCACGGTATCC  
TCTGCCGAAACAGAGGTTGGACAAGACCGGAGGGGTCTCCTAGTTCCAAAGGAGATGTACTCCGGGCT  
+  
FFFFFFFFFFFFFFFFFFFFFFFFFFFFFFFFFFFFFFFFFFFFFFFFFFFFFFFFFFFFFFFFFFFFFFFF  
FFFFFFFFFFFFFFFFFFFFFFFFFFFFFFFFFFFFFFFFFFFFFFFFFFFFFFFFFFFFFFFFFFFFFFFF:FFFFFFFFFFFFF  
@A00155:342:HHGFNDSXY:1:1646:24957:9142 1:N:0:GAACCTAG+TCCGCATA  
CTCGGGCCACAGCCTTACAGCTGTGGAGCACGGTATCCTCTGCCGAAACAGAGGTTGGACAAGACCG  
GAGGGGTCTCCTAGTTCCAAAGGAGATGTACTCCGGGCTTGTTACGACCTACCGTGTAAAGTCGAGT  
+  
FFFFFFFFFFFFFFFFFFFFFFFFFFFFFFFFFFFFFFFFFFFFFFFFFFFFFFFFFFFFFFFFFFFFFFFF  
FFFFFFFFFFFFFFFFFFFFFFFFFFFFFFFFFFFFFFFFFFFFFFFFFFFFFFFFFFFFFFFFFFFFFFFF:FFFFF:FFFFFFFFFFFF  
@A00155:342:HHGFNDSXY:1:1646:19135:19946 1:N:0:GAACCTAG+TCCGCATA  
GGATGTAGAGGGCGAGAGAGAGCGACTTCTCTCGGGCCACAGCCTTACAGCTGTGGAGCACGGTATC  
CTCTGCCGAAACAGAGGTTGGACAAGACCGGAGGGGTCTCCTAGTTCCAAAGGAGATGTACTCC  
+  
FFFFFFFFFFFFFFFFFFFFFFFFFFFFFFFFFFFFFFFFFFFFFFFFFFFFFFFFFFFFFFFFFFFFFFFF  
FFFFFFFFFFFFFFFFFFFFFFFFFFFFFFFFFFFFFFFFFFFFFFFFFFFFFFFFFFFFFFFFFFFFFFFF  
@A00155:342:HHGFNDSXY:1:1646:12635:23625 1:N:0:GAACCTAG+TCCGCATA  
GGATGTGGAGGGCGAGAGAGAGCGACTTCTCTCGGGCCACAGCCTTACAGCTGTGGAGCACGGTATC  
CTCTGCCGAAACAGAGGTTGGACAAGACCGGAGGGGTCTCCTAGTTCCAAAGGAGATGTACTCC  
+  
FFFFFFFFFFFFFFFFFFFFFFFFFFFFFFFFFFFFFFFFFFFFFFFFFFFFFFFFFFFFFFFFFFFFFFFF  
FFFFFFFFFFFFFFFFFFFF:FFFFFFFFFFFFFFFFFFFFFFFFFFFFFFFFFFFFFFFFFFFFFFFFFFFF  
@A00155:342:HHGFNDSXY:1:1646:8404:33959 1:N:0:GAACCTAG+TCCGCATA  
CATCTCAATGCCGAGAGGGATGTGGAGGGCGAGAGAGAGCGACTTCTCTCGGGCCACAGCCTTACAG  
CTGTGGAGCACGGTATCCTCTGCCGAAACAGAGGTTGGACAAGACCGGAGGGGTCTCCTAGTTCCAAA  
+

[illegible]



FFFFFFFFFFFFFFFFFFFFFFFFFFFFFFFFFFFFFFFFFFFFFFFFFFFFFFFFFFFFFFFFFFFFFFFFFFFFFFFF  
FFFFFFFFFFFFFFFFFFFFFFFFFFFFFFFFFFFFFFFFFFFFFFFFFFFFFFFFFFFFFFFFFFFFFFFFFFFFFFFF:FFFF  
@A00155:342:HHGFNDSXY:1:1649:8703:21261 1:N:0:GAACCTAG+TCCGCATA  
GGGCGAGAGAGCGACTTCTCTCGGGCCACAGCCTTACAGCTGTGGAGCACGGTATCCTCTGCCGA  
AACAGAGGTTGGACAAGACCGGAGGGGTCTCCTAGTTCCAAAGGAGATGTACTCCGGGCTTGTTACG  
+  
FFFFFFFFFFFFFFFFFFFFFFFFFFFFFFFFFFFFFFFFFFFFFFFFFFFFFFFFFFFFFFFFFFFFFFFFFFFFFFFF  
FFFFFFFFFFFFFFFFFFFFFFFFFFFFFFFFFFFFFFFFFFFFFFFFFFFFFFFFFFFFFFFFFFFFFFFFFFFFFFFF  
@A00155:342:HHGFNDSXY:1:1649:29939:24471 1:N:0:GAACCTAG+TCCGCATA  
GTCCACTTAAGGACTCACCTCTGGCTTATGGTCATCTCAATGCCGAGAGGGATGTGGAGGGCGAGAGA  
GAGCGACTTCTCTCGGGCCACAGCCTTACAGCTGTGGAGCACGGTATCCTCTGCCGAAACAGAGGTT  
+  
FFFFFFFFFFFFFFFFFFFFFFFFFFFFFFFFFFFFFFFFFFFFFFFFFFFFFFFFFFFFFFFFFFFFFFFFFFFFFFFF  
FFFFFFFFFFFFFFFFFFFFFFFFFFFFFFFFFFFFFFFFFFFFFFFFFFFFFFFFFFFFFFFFFFFFFFFFFFFFFFFF  
@A00155:342:HHGFNDSXY:1:1649:3613:36746 1:N:0:GAACCTAG+TCCGCATA  
AAGGACTCACCTCTGGCCTATGGTCATCTCAATGCCGAGAGGGATGTGGAGGGCGAGAGAGAGCGACT  
TCTCTCGGGCCACAGCCTTACAGCTGTGGAGCACGGTATCCTCTGCCGAAACAGAGGTTGGACAAGA  
+  
FFFFFFFFFFFFFFFFFFFFFFFFFFFFFFFFFFFFFFFFFFFFFFFFFFFFFFFFFFFFFFFFFFFFFFFFFFFFFFFF  
FFFFFFFFFFFFFFFFFFFFFFFFFFFFFFFFFFFFFFFFFFFFFFFFFFFFFFFFFFFFFFFFFFFFFFFFFFFFFFFF  
@A00155:342:HHGFNDSXY:1:1650:18078:2581 1:N:0:GAACCTAG+TCCGCATA  
CTGTGTCCACTTAAGGACTCACCTCTGGCCTATGGTCATCTCAATGCCGAGAGGGATGTAGAGGGCGA  
GAGAGAGCGACTTCTCTCGGGCCACAGCCTTACAGCTGTGGAGCACGGTATCCTCTGCCGAAACAGA  
+  
FFFFFFFFFFFFFFFFFFFFFFFFFFFFFFFFFFFFFFFFFFFFFFFFFFFFFFFFFFFFFFFFFFFFFFFFFFFFFFFF  
FFFFFFFFFFFFFFFFFFFFFFFFFFFFFFFFFFFFFFFFFFFFFFFFFFFFFFFFFFFFFFFFFFFFFFFFFFFFFFFF  
@A00155:342:HHGFNDSXY:1:1650:8558:21699 1:N:0:GAACCTAG+TCCGCATA  
GTCATCTCAATGCCGAGAGGGATGTGGAGGGCGAGAGAGAGCGACTTCTCTCGGGCCACAGCCTTAC  
AGCTGTGGAGCACGGTATCCTCTGCCGAAACAGAGGTTGGACAAGACCGGAGGGGTCTCCTAGTTCCA  
+  
FFFFFFFFFFFFFFFFFFFFFFFFFFFFFFFFFFFFFFFFFFFFFFFFFFFFFFFFFFFFFFFFFFFFFFFFFFFFFFFF  
FFFFFFFFFFFFFFFFFFFFFFFFFFFFFFFFFFFFFFFFFFFFFFFFFFFFFFFFFFFFFFFFFFFFFFFFFFFFFFFF  
@A00155:342:HHGFNDSXY:1:1650:31702:26616 1:N:0:GAACCTAG+TCCGCATA  
CTTCTCTCGGGCCACAGCCTTACAGCTGTGGAGCACGGTATCCTCTGCCGAAACAGAGGTTGGACAA  
GACCGGAGGGGTCTCCTAGTTCCAAAGGAGATGTACTCCGGGCTTGTTACGACCTACCGTGTA  
+  
FFFFFFFFFFFFFFFFFFFFFFFFFFFFFFFFFFFFFFFFFFFFFFFFFFFFFFFFFFFFFFFFFFFFFFFFFFFFFFFF  
FFFFFFFFFFFFFFFFFFFFFFFFFFFFFFFFFFFFFFFFFFFFFFFFFFFFFFFFFFFFFFFFFFFFFFFFFFFFFFFF  
@A00155:342:HHGFNDSXY:1:1650:14253:31751 1:N:0:GAACCTAG+TCCGCATA  
GAGCGACTTCTCTCGGGCCACAGCCTTACAGCTGTGGAGCACGGTATCCTCTGCCGAAACAGAGGTT  
GGACAAGACCGGAGGGGTCTCCTAGTTCCAAAGGAGATGTACTCCGGGCTTGTTACGACCTACCGTG  
+  
FFFFFFFFFFFFFFFFFFFFFFFFFFFFFFFFFFFFFFFFFFFFFFFFFFFFFFFFFFFFFFFFFFFFFFFFFFFFFFFF  
FFFFFFFFFFFFFFFFFFFFFFFFFFFFFFFFFFFFFFFFFFFFFFFFFFFFFFFFFFFFFFFFFFFFFFFFFFFFFFFF  
@A00155:342:HHGFNDSXY:1:1651:1353:6057 1:N:0:GAACCTAG+TCCGCATA  
TTAAGGACTCACCTCTGGCCTATGGTCATCTCAATGCCGAGAGGGATGTGGAGGGCGAGAGAGCGA  
CTTCTCTCGGGCCACAGCCTTACAGCTGTGGAGCACGGTATCCTCTGCCGAAACAGAGGTTGGACAA  
+  
FFFFFFFFFFFFFFFFFFFFFFFFFFFFFFFFFFFFFFFFFFFFFFFFFFFFFFFFFFFFFFFFFFFFFFFFFFFFFFFF  
F:FFFFFFFFFFFFFFFFFFFFFFFFFFFFFFFFFFFFFFFFFFFFFFFFFFFFFFFFFFFFFFFFFFFFFFFFFFFF  
@A00155:342:HHGFNDSXY:1:1651:18774:23109 1:N:0:GAACCTAG+TCCGCATA  
TTAAGGACTCTCCTCTGGCCTATGGTCATCTCAATGCCGAGAGGGATGTGGAGGGCGAGAGAGCGA  
CTTCTCTCGGGCCACAGCCTTACAGCTGTGGAGCACGGTATCCTCTGCCGAAACAGAGGTTGGACAA  
+

FFFFF:FFFFFFFFFFFFFFFFFFFFFFFFFFFFFFFFFFFFFFFFFFFFFFFFFFFFFFFFFFFFFFFFFFFFF  
FFFFFFFFFFFFFFFFFFFFFFFFFFFFFFFFFFFFFFFFFFFFFFFFFFFFFFFFFFFFFFFFFFFFFFFFFFFFF  
@A00155:342:HHGFNDSXY:1:1651:21468:26804 1:N:0:GAACCTAG+TCCGCATA  
TCCTCTGCCGAAACAGAGGTTTGACAAGACCGGAGGGGTCTCCTAGTTCCAAAGGAGATGTACTCCGG  
GCTTGTTACGACCTACCGTGTAAGTCGTAGTCTAGTAGGCTACCTGACGAGTCCTTTTAGGACGAA  
+  
FFFFFFFFFFFFFFFFFFFFFFFFFFFFFFFFFFFFFFFFFFFFFFFFFFFFFFFFFFFFFFFFFFFFFFFFFFFFF  
FFFFFFFFFFFFFFFFFFFFFFFFFFFFFFFFFFFFFFFFFFFFFFFFFFFFFFFFFFFFFFFFFFFFFFFFFFFFF  
@A00155:342:HHGFNDSXY:1:1651:2329:30013 1:N:0:GAACCTAG+TCCGCATA  
TGTCCACTTAAGGACTCACCTCTGGCCTATGGTCATCTCAATGCCGAGAGGGATGTGAAGGGCGAGAG  
AGAGCGACTTCTCTCGGGCCCACAGCCTTACAGCTGTGGAGCACGGTATCCTCTGCCGAAACAGAGGT  
+  
FFFFF:FFFFFFFFFFFFFFFFFFFFFFFFFFFFFFFFFFFFFFFFFFFFFFFFFFFFFFFFFFFFFFFFFFFFF  
FFFFFFFFFFFFFFFFFFFFFFFFFFFFFFFFFFFFFFFFFFFFFFFFFFFFFFFFFFFFFFFFFFFFFFFFFFFFF  
@A00155:342:HHGFNDSXY:1:1651:32027:34914 1:N:0:GAACCTAG+TCCGCATA  
GAGCGACTTCTCTCGGGCCCACAGCCTTACAGCTGTGGAGCACGGTATCCTCTGCCGAAACAGAGGTT  
GGACAAGACCGGAGGGGTCTCCTAGTTCCAAAGGAGATGTACTCCGGGCTTGTTACGACCTACCGTG  
+  
FFFFFFFFFFFFFFFFFFFFFFFFFFFFFFFFFFFFFFFFFFFFFFFFFFFFFFFFFFFFFFFFFFFFFFFFFFFFF  
FFFFFFFFFFFFFFFFFFFFFFFFFFFFFFFFFFFFFFFFFFFFFFFFFFFFFFFFFFFFFFFFFFFFFFFFFFFFF  
@A00155:342:HHGFNDSXY:1:1652:25735:5259 1:N:0:GAACCTAG+TCCGCATA  
AGGGATGTGGAGGGCGAGAGAGAGCGACTTCTCTCGGGCCCACAGCCTTACAGCTGTGGAGCACGGTA  
TCCTCTGCCGAAACAGAGGTTGGACAAGACCGGAGGGGTCTCCTAGTTCCAAAGGAGATGTACTCCGG  
+  
FFFFFFFFFFFFFFFFFFFFFFFFFFFFFFFFFFFFFFFFFFFFFFFFFFFFFFFFFFFFFFFFFFFFFFFFFFFFF  
FFFFFFFFFFFFFFFFFFFFFFFFFFFFFFFFFFFFFFFFFFFFFFFFFFFFFFFFFFFFFFFFFFFFFFFFFFFFF  
@A00155:342:HHGFNDSXY:1:1652:16080:9674 1:N:0:GAACCTAG+TCCGCATA  
TTCTCTCGGGCCCACAGCCTTACAGCTGTGGAGCACGGTATCCTCTGCCGAAACAGAGGTTGGACAAG  
ACCGGAGGGGTCTCCTAGTTCCAAAGGAGATGTACTCCGGGCTTGTTACGACCTACCGTGTAAGTCG  
+  
FFFFFFFFFFFFFFFFFFFFFFFFFFFFFFFFFFFFFFFFFFFFFFFFFFFFFFFFFFFFFFFFFFFFFFFFFFFFF  
FFFFFFFFFFFFFFFFFFFFFFFFFFFFFFFFFFFFFFFFFFFFFFFFFFFFFFFFFFFFFFFFFFFFFFFFFFFFF  
@A00155:342:HHGFNDSXY:1:1652:8748:16297 1:N:0:GAACCTAG+TCCGCATA  
CACCTCTGGCCTATGGTCATCTCAATGCCGAGAGGGATGTGGAGGGCGAGAGAGAGCGACTTCTCTCG  
GGCCCACAGCCTTACAGCTGTGGAGCACGGTATCCTCTGCCGAAACAGAGGTTGGACAAGACCGGAGG  
+  
FFFFFFFFFFFFFFFFFFFFFFFFFFFFFFFFFFFFFFFFFFFFFFFFFFFFFFFFFFFFFFFFFFFFFFFFFFFFF  
FFFFFFFFFFFFFFFFFFFFFFFFFFFFFFFFFFFFFFFFFFFFFFFFFFFFFFFFFFFFFFFFFFFFFFFFFFFFF  
@A00155:342:HHGFNDSXY:1:1652:18078:19335 1:N:0:GAACCTAG+TCCGCATA  
CCCACAGCCTTACAGCTGTGGAGCACGGTATCCTCTGCCGAAACAGAGGTTGGACAAGACCGGAGGGG  
TCTCCTAGTTCCAAAGGAGATGTACTCCGGGCTTGTTACGACCTACCGTGTAAGTCGTAGTCTAGTA  
+  
FFFFFFFFFFFFFFFFFFFFFFFFFFFFFFFFFFFFFFFFFFFFFFFFFFFFFFFFFFFFFFFFFFFFFFFFFFFFF  
FFFFFFFFFFFFFFFFFFFFFFFFFFFFFFFFFFFFFFFFFFFFFFFFFFFFFFFFFFFFFFFFFFFFFFFFFFFFF  
@A00155:342:HHGFNDSXY:1:1652:19569:19601 1:N:0:GAACCTAG+TCCGCATA  
ATCTCAATGCCGAGAGGGATGTGGAGGGCGAGAGAGAGCGACTTCTCTCGGGCCCACAGCCTTACAGC  
TGTGGAGCACGGTATCCTCTGCCGAAACAGAGGTTGGACAAGACCGGAGGGGTCTCCTAGTTCCAAAG  
+  
:FFFFFFFFF:FFFFFFFFFFFFFFFFFFFFFFFFFFFFFFFFFFFFFFFFFFFFFFFFFFFFFFFFFFFFFFFFF  
FFFFFFFFFFFFFFFFFFFFFFFFFFFFFFFFFFFFFFFFFFFFFFFFFFFFFFFFFFFFFFFFFFFFFFFFFFFFF  
@A00155:342:HHGFNDSXY:1:1652:20446:24064 1:N:0:GAACCTAG+TCCGCATA  
AGAGAGAGCGACTTCTCTCGGGCCCACAGCCTTACAGCTGTGGAGCACGGTATCCTCTGCCGAAACAG  
AGGTTGGACAAGACCGGAGGGGTCTCCTGGTTCCAAAGGAGATGTACTCCGGGCTTGTTACGACCTA  
+

```
FFFFFFFFFFFFFFFFFFFFFFFFFFFFFFFFFFFFFFFFFFFFFFFFFFFFFFFFFFFFFFFFFF:FFF  
FFFFFFFFFFFFFFFFFFFFFFFFFFFFFFFFFFFFFFFFFFFFFFFFFFFFFFFFFFFFFFFFFFFFF:  
@A00155:342:HHGFNDSXY:1:1652:18539:32722 1:N:0:GAACCTAG+TCCGCATA  
AAAGACTCACCTCTGGCCTATGGTCATCTCAATGCCGAGAGGGATGTGGAGGGCGAGAGAGCGACT  
TCTCTCGGGCCCACAGCCTTACAGCTGTGGAGCACGGTATCCTCTGCCGAAACAGAGGTTGGACAAGA  
+  
FFFFFFFFFFFFFFFFFFFFFFFFFFFFFFFFFFFFFFFFFFFFFFFFFFFFFFFFFFFFFFFFFFFFF  
FFFFFFFFFFFFFFFFFFFFFFFFFFFFFFFFFFFFFFFFFFFFFFFFFFFFFFFFFFFFFFFFFFFFF:  
@A00155:342:HHGFNDSXY:1:1653:15139:7451 1:N:0:GAACCTAG+TCCGCATA  
CTTCTCTCGGGCCCACAGCCTTACAGCTGTGGAGCACGGTATCCTCTGCCGAAACAGAGGTTGGACAA  
GACCGAGGGGTCTCCTAGTTCCAAAGGAGATGTACTCCGGGCTTGTTACGACCTACCGTGTA  
+  
FFFFFFFFFFFFFFFFFFFFFFFFFFFFFFFFFFFFFFFFFFFFFFFFFFFFFFFFFFFFFFFFFFFFF  
FFFFFFFFFFFFFFFFFFFFFFFFFFFFFFFFFFFFFFFFFFFFFFFFFFFFFFFFFFFFFFFFFFFFF:  
@A00155:342:HHGFNDSXY:1:1653:6813:15734 1:N:0:GAACCTAG+TCCGCATA  
CAATGCCGAGAGGGATGTAGAGGGCGAGAGAGAGCGACTTCTCTCGGGCCCACAGCCTTACAGCTGTG  
GAGCACGGTATCCTCTGCCGAAACAGAGGTTGGACAAGACCGGAGGGGTCTCCTAGTTCCAAAGGAGA  
+  
FFFFFFFFFFFFFFFFFFFFFFFFFFFFFFFFFFFFFFFFFFFFFFFFFFFFFFFFFFFFFFFFFFFFF  
FFFFFFFFFFFFFFFFFFFFFFFFFFFFFFFFFFFFFFFFFFFFFFFFFFFFFFFFFFFFFFFFFFFFF:  
@A00155:342:HHGFNDSXY:1:1653:31060:24189 1:N:0:GAACCTAG+TCCGCATA  
AGAGAGAGCGACTTCTCTCGGGCCCACAGCCTTACAGCTGTGGAGCACGGTATCCTCTGCCGAAACAG  
AGGTTGGACAAGACCGGAGGGGTCTCCTGGTTCCAAAGGAGATGTACTCCGGGCTTGTTACGACCT  
+  
FFFFFFFFFFFFFFFFFFFFFFFFFFFFFFFFFFFFFFFFFFFFFFFFFFFFFFFFFFFFFFFFFFFFF  
FFFFFFFFFFFFFFFFFFFFFFFFFFFFFFFFFFFFFFFFFFFFFFFFFFFFFFFFFFFFFFFFFFFFF:  
@A00155:342:HHGFNDSXY:1:1653:21676:26944 1:N:0:GAACCTAG+TCCGCATA  
GTCATCTCAATGCCGAGAGGGATGTGGAGGGCGAGAGAGAGCGACTTCTCTCGGGCCCACAGCCTTAC  
AGCTGTGGAGCACGGTATCCTCTGCCGAAACAGAGGTTGGACAAGACCGGAGGGGTCTCCTAGTTCCA  
+  
FFFFFFFFFFFFFFFFFFFFFFFFFFFFFFFFFFFFFFFFFFFFFFFFFFFFFFFFFFFFFFFFFFFFF,  
FFFFFFFFFFFFFFFFFFFFFFFFFFFFFFFFFFFFFFFFFFFFFFFFFFFFFFFFFFFFFFFFFFFFF,  
@A00155:342:HHGFNDSXY:1:1653:20645:27821 1:N:0:GAACCTAG+TCCGCATA  
CTCAATGCCGAGAGGGATGTGGAGGGCGAGAGAGAGCAACTTCTCTCGGGCCCACAGCCTTACAGCTG  
TGGAGCACGGTATCCTCTGCCGAAACAGAGGTTGGACAAGACCGGAGGGGTCTCCTAGTTCCAAAGGA  
+  
FFFFFFFFFFFFFFFFFFFFFFFFFFFFFFFFFFFFFFFFFFFFFFFFFFFFFFFFFFFFFFFFFFFFF:  
FFFFFFFFFFFFFFFFFFFFFFFFFFFFFFFFFFFFFFFFFFFFFFFFFFFFFFFFFFFFFFFFFFFFF,  
@A00155:342:HHGFNDSXY:1:1653:2763:28667 1:N:0:GAACCTAG+TCCGCATA  
AGAGAGCGACTTCTCTCGGGCCCACAGCCTTACAGCTGTGGAGCACGGTATCCTCTGCCGAAACAGAG  
GTTGGACAAGACCGGAGGGGTCTCCTAGTTCCAAAGGAGATGTACTCCGACTTGTTACGACCTACC  
+  
FFFFFFFFFFFFFFFFFFFFFFFFFFFFFFFFFFFFFFFFFFFFFFFFFFFFFFFFFFFFFFFFFFFFF:  
FFFFFFFFFFFFFFFFFFFFFFFFFFFFFFFFFFFFFFFFFFFFFFFFFFFFFFFFFFFFFFFFFFFFF,  
@A00155:342:HHGFNDSXY:1:1653:24415:30749 1:N:0:GAACCTAG+TCCGCATA  
GAGAGGGATGTGGAGGGCGAGAGAGAGCGACTTCTCTCGGGCCCACAGCCTTACAGCTGTGGAGCACG  
GTATCCTCTGCCGAAACAGAGGTTGGACAAGACCGGAGGGGTCTCCAGTTCCAAAGGAGATGTACTC  
+  
FFFFFFFFFFFFFF:FFFFFFFFFFFFFFFFFFFFFFFFFFFFFFFFFFFFFFFFFFFFFFFFFFFFFFFF  
FFFFFFFFFFFFFFFFFFFFFFFFFFFFFFFFFFFFFFFFFFFFFFFFFFFFFFFFFFFFFFFFFFFFF,  
@A00155:342:HHGFNDSXY:1:1653:21377:32377 1:N:0:GAACCTAG+TCCGCATA  
TCCACTTAAGGACTCACCTCTGGCCTATGGTCATCTCAATGCCGAGAGGGATGTGGAGGGCGAGAGAG  
AGCGACTTCTCTCGGGCCCACAGCCTTACAGCTGTGGAGCACGGTATCCTCTGCCGAAACAGAGGTTG
```

FFFFFFFFF:FFFFFF,FFFFFFFFFFFFFFFFFFFFFFFFFFFFFFFFFFFFFFFFFFFFFFFFFFFFFFFFFFFFFFFF  
FFFFFFFFFFFFFFFFFFFFFFFFFFFFFFFFFFFFFFFFFFFFFFFFFFFFFFFFFFFFFFFFFFFFFFFFFFFFFFFF  
@A00155:342:HHGFNDSXY:1:1653:26666:33677 1:N:0:GAACCTAG+TCCGCATA  
GAGAGGGATGTGGAGGGCGAGAGAGAGCGACTTCTCTCGGGCCCACAGCCTTACAGCTGTGGAGCACG  
GTATCCTCTGCCGAAACAGAGGTTGGACAAGACCGGAGGGGTCTCCAGTTCCAAAGGAGATGTACTC  
+  
FFFFFFFFFFFFFFFFFFFFFFFFFFFFFFFFFFFFFFFFFFFFFFFFFFFFFFFFFFFFFFFFFFFFFFFFFFFFFFFF  
FFFFFFFFFFFFFFFFFFFFFFFFFFFFFFFFFFFFFFFFFFFFFFFFFFFFFFFFFFFFFFFFFFFFFFFFFFFFFFFF  
@A00155:342:HHGFNDSXY:1:1654:4065:2769 1:N:0:GAACCTAG+TCCGCATA  
ATCTCAATGCCGAGAGGGATGTGGAGGGCGAGAGAGAGCGACTTCTCTCGGGCCCACAGCCTTACAGC  
TGTGGAGCACGGTATCCTCTGCCGAAACAGAGGTTGGACAAGACCGGAGGGGTCTCCTGGTTCCAAAG  
+  
FF:F:F:FFFFFFFFFFFFFF:FFFF,FFFFFFFFFFFFFFFFFFFFFFFFFFFFFFFFFFFFFFFFFFFFFFFFFFFFF:  
FFFFFFFFFFFFFFFFFFFFFFFFFFFFFFFFFFFFFFFFFFFFFFFFFFFFFFFFFFFFFFFFFFFFFFFFFFFFFFFF:  
@A00155:342:HHGFNDSXY:1:1654:14733:6527 1:N:0:GAACCTAG+TCCGCATA  
CAATGCCGAGAGGGATGTGGAGGGCGAGAGAGAGCGACTTCTCTCGGGCCCACAGCCTTACAGCTGTG  
GAGCACGGTATCCTCTGCCGAAACAGAGGTTGGACAAGACCGGAGGGGTCTCCTAGTTCCAAAGGAGA  
+  
FFFFFFFFF:FFFFFFFFFFFFFFFFFFFFFFFFFFFFFFFFFFFFFFFFFFFFFFFFFFFFFFFFFFFFFFFFFFFFF  
FFFFFFFFFFFFFFFFFFFFFFFFFFFFFFFFFFFFFFFFFFFFFFFFFFFFFFFFFFFFFFFFFFFFFFFFFFFFFFFF:FFF  
@A00155:342:HHGFNDSXY:1:1654:28492:10160 1:N:0:GAACCTAG+TCCGCATA  
CCTTACAGCTGTGGAGCACGGTATCCTCTGCCGAAACAGAGGTTGGACAAGACCGGAGGGGTCTCCTG  
GTTCCAAAGGAGATGTACTCCGGGCTTGTTACGACCTACCGTGTAAGTCGTAGTCTAGTAGGCTACC  
+  
FFFFFFFFFFFFFFFFFFFFFFFFFFFFFFFFFFFFFFFFFFFFFFFFFFFFFFFFFFFFFFFFFFFFFFFFFFFFF:  
FFFFFFFFFFFFFFFFFFFFFFFFFFFFFFFFFFFFFFFFFFFFFFFFFFFFFFFFFFFFFFFFFFFFFFFFFFFFF  
@A00155:342:HHGFNDSXY:1:1654:21721:11209 1:N:0:GAACCTAG+TCCGCATA  
GATGTGGAGGGCGAGAGAGAGCGACTTCTCTCGGGCCCACAGCCTTACAGCTGTGGAGCACGGTATCC  
TCTGCCGAAACAGAGGTTGGACAAGACCGGAGGGGTCTCCTAGTTCCAAAGGAGATGTACTCCGGGCT  
+  
FFFFFFFFFFFFFFFFFFFFFFFFFFFFFFFFFFFFFFFFFFFFFFFFFFFFFFFFFFFFFFFFFFFFFFFFFFFFF:  
:FFFF:FFFFFFFFFFFFFFFFFFFFFFFFFFFFFFFFFFFFFFFFFFFFFFFFFFFFFFFFFFFFFFFFFFFFF  
@A00155:342:HHGFNDSXY:1:1654:29930:11616 1:N:0:GAACCTAG+TCCGCATA  
ATCTCAATGCCGAGAGGGATGTGGAGGGCGAGAGAGAGCGACTTCTCTCGGGCCCACAGCCTTACAGC  
TGTGGAGCACGGTATCCTCTGCCGAAACAGAGGTTGGACAAGACCGGAGGGGTCTCCTAGTTCCAAAG  
+  
FFFFFFFFFFFFFFFFFFFFFFFFFFFFFFFFFFFFFFFFFFFFFFFFFFFFFFFFFFFFFFFFFFFFFFFFFFFFF  
FFFFFFFFFFFFFFFFFFFFFFFFFFFFFFFFFFFFFFFFFFFFFFFFFFFFFFFFFFFFFFFFFFFFFFFFFFFFF:  
@A00155:342:HHGFNDSXY:1:1654:21685:12430 1:N:0:GAACCTAG+TCCGCATA  
GATGTGGAGGGCGAGAGAGAGCGACTTCTCTCGGGCCCACAGCCTTACAGCTGTGGAGCACGGTATCC  
TCTGCCGAAACAGAGGTTGGACAAGACCGGAGGGGTCTCCTAGTTCCAAAGGAGATGTACTCCGGGCT  
+  
FFFF,FFFFFFFFFFFFFFFFFFFFFFFFFFFFFFFFFFFFFFFFFFFFFFFFFFFFFFFFFFFFFFFFFFFFF  
FFFFFFFFFFFFFFFFFFFFFFFFFFFFFFFFFFFFFFFFFFFFFFFFFFFFFFFFFFFFFFFFFFFFFFFFFFFFF:  
@A00155:342:HHGFNDSXY:1:1654:5737:21324 1:N:0:GAACCTAG+TCCGCATA  
CTCAATGCCGAGAGGGATGTGGAGGGCGAGAGAGAGCGACTTCTCTCGGGCCCACAGCCTTACAGCTG  
TGGAGCACGGTATCCTCTGCCGAAACAGAGGTTGGACAAGACCGGAGGGGTCTCCTAGTTCCAAAGGA  
+  
FFFFFFFFFFFFFFFFFFFF,FFFFFFFFFFFFFFFFFFFFFFFFFFFFFFFFFFFFFFFFFFFFFFFFFFFFFFFFFFFF  
FFFFFFFFFFFFFFFFFFFFFFFFFFFFFFFFFFFFFFFFFFFFFFFFFFFFFFFFFFFFFFFFFFFFFFFFFFFFF  
@A00155:342:HHGFNDSXY:1:1654:4580:22388 1:N:0:GAACCTAG+TCCGCATA  
ATCTCAATGCCGAGAGGGATGTAGAGGGCGAGAGAGAGCGACTTCTCTCGGGCCCACAGCCTTACAGC  
TGTGGAGCACGGTATCCTCTGCCGAAACAGAGGTTGGACAAGACCGGAGGGGTCTCCTAGTTCCAAAG  
+

FFFFFFFFFFFFFFFF:FFFFFFFFFFFFFFFF:FFFFFFFFFFFFFFFFFFFFFFFFFFFFFFFF  
FFFFFFFF:FFFFFFFFFFFFFFFFFFFFFFFFFFFFFFFFFFFFFFFFFFFFFFFFFFFFFFFF  
@A00155:342:HHGFNDSXY:1:1655:14570:6872 1:N:0:GAACCTAG+TCCGCATA  
CTCTGGCCTATGGTCATCTCAATGCCGAGAGGGATGTAGAGGGCGAGAGAGAGCGACTTCTCTCGGGC  
CCACAGCCTTACAGCTGTGGAGCACGGTATCCTCTGCCGAAACAGAGGTTGGACAAGACCGGAGGGGT  
+  
FFFFFFFFFFFFFFFFFFFFFFFFFFFFFFFF:FFFFFFFFFFFFFFFFFFFFFFFFFFFFFFFF  
FFFFFFFF:FFFFFFFFFFFFFFFFFFFFFFFFFFFFFFFFFFFFFFFFFFFFFFFFFFFFFFFF  
@A00155:342:HHGFNDSXY:1:1655:8495:19116 1:N:0:GAACCTAG+TCCGCATA  
TGCCGAAACAGAGGTTGGACAAGACCGGAGGGGTCTCCTAGTTCCAAAGGAGATGTACTCCGGGCTTG  
TTCACGACCTACCGTGTAAGTCGTAGTCTAGTAGGCTACCTGACGAGTCCTTTTAGGAC  
+  
FFFFFFFFFFFFFFFFFFFFFFFFFFFFFFFFFFFFFFFFFFFFFFFFFFFFFFFFFFFFFFFF  
FFFFFFFFFFFFFFFFFFFFFFFF:F:FFFFFFFFFFFFFFFFFFFFFFFFFFFFFFFF  
@A00155:342:HHGFNDSXY:1:1655:10294:20760 1:N:0:GAACCTAG+TCCGCATA  
TTAAGGACTCTCCTCTGGCCTATGGTCATCTCAATGCCGAGAGGGATGTGGAGGGCGAGAGAGAGCGA  
CTTCTCTCGGGCCACAGCCTTACAGCTGTGGAGCACGGTATCCTCTGCCGAAACAGAGGTTGGAC  
+  
FFFFFFFFFFFFFFFFFFFFFFFFFFFFFFFFFFFFFFFFFFFFFFFFFFFFFFFFFFFFFFFF  
FFFFFFFFFFFFFFFFFFFFFFFFFFFFFFFF,FFFFFFFFFFFFFFFFFFFFFFFFFFFFFFFF  
@A00155:342:HHGFNDSXY:1:1655:31123:24518 1:N:0:GAACCTAG+TCCGCATA  
ATGCCGAGAGGGATGTGGAGGGCGAGAGAGAGCGACTTCTCTCGGGCCACAGCCTTACAGCTGTGGA  
GCACGGTATCCTCTGCCGAAACAGAGGTTGGACAAGACCGGAGGGGTCTCCTAGTTCCAAAGGAGATG  
+  
FFFFFFFFFFFFFFFFFFFFFFFFFFFFFFFFFFFFFFFF:FFFFFFFFFFFFFFFFFFFFFFFF  
FFFFFFFFFFFFFFFFFFFFFFFFFFFFFFFFFFFFFFFFFFFFFFFFFFFFFFFFFFFFFFFF:FFFFFFF  
@A00155:342:HHGFNDSXY:1:1656:9091:20807 1:N:0:GAACCTAG+TCCGCATA  
ATCTCAATGCCGAGAGGGATGTGGAGGGCGAGAGAGAGCGACTTCTCTCGGGCCACAGCCTTACAGC  
TGTGGAGCACGGTATCCTCTGCCGAAACAGAGGTTGGACAAGACCGGAGGGGTCTCCTAGTTCCAAAG  
+  
FFFFFFFFFFFFFFFFFFFFFFFFFFFFFFFFFFFFFFFF:FFFFFFFFFFFF:FFFFFF:FFFF  
FFFFFFFFFFFFFFFFFFFFFFFFFFFFFFFFFFFFFFFFFFFFFFFFFFFFFFFFFFFFFFFF  
@A00155:342:HHGFNDSXY:1:1656:15980:22091 1:N:0:GAACCTAG+TCCGCATA  
CAATGCCGAGAGGGATGTGGAGGGCGAGAGAGAGCGACTTCTCTCGGGCCACAGCCTTACAGCTGTG  
GAGCACGGTATCCTCTGCCGAAACAGAGGTTGGACAAGACCGGAGGGGTCTCCTAGTTCCAAAGGAGA  
+  
FFFFFFFFFFFFFFFFFFFF,FFFFFFFFFFFFFFFFFFFFFFFFFFFFFFFFFFFFFFFF  
FFFFFFFFFFFFFFFFFFFFFFFF:FFFF:FFFFFFFFFFFFFFFF:FFFFFFFFFFFF:FFFFFFF  
@A00155:342:HHGFNDSXY:1:1656:21178:24142 1:N:0:GAACCTAG+TCCGCATA  
CGAGAGAGAGCGACTTCTCTCGGGCCACAGCCTTACAGCTGTGGAGCACGGTATCCTCTGCCGAAAC  
AGAGGTTGGACAAGACCGGAGGGGTCTCCTGGTTCCAAAGGAGATGTACTCCGGGCTTGTTACGACC  
+  
FFFFFFFFFFFFFFFFFFFFFFFF:FFFFFFFFFFFFFFFFFFFFFFFFFFFFFFFFFFFFFFFF  
FFFFFFFFFFFFFFFFFFFFFFFFFFFFFFFFFFFFFFFFFFFFFFFFFFFFFFFFFFFFFFFF  
@A00155:342:HHGFNDSXY:1:1656:19913:28369 1:N:0:GAACCTAG+TCCGCATA  
CAATGCCGAGAGGGATGTAGAGGGCGAGAGAGAGCGACTTCTCTCGGGCCACAGCCTTACAGCTGTG  
GAGCACGGTATCCTCTGCCGAAACAGAGGTTGGACAAGACCGGAGGGGTCTCCTAGTTCCAAAGGAGA  
+  
FFFFFFFFFFFFFFFFFFFFFFFF:FFFFFFFFFFFFFFFFFFFFFFFFFFFFFFFF:FFFFFFF  
FFFFFFFFFFFFFFFF:FFFFFFFFFFFFFFFFFFFFFFFFFFFFFFFF,FFFFFFFFFFFF:FFF  
@A00155:342:HHGFNDSXY:1:1656:27299:30326 1:N:0:GAACCTAG+TCCGCATA  
CTTCTCTCGGGCCACAGCCTTACAGCTGTGGAGCACGGTATCCTCTGCCGAAACAGAGGTTGGACAA  
GACCGGAGGGGTCTCCTAGTTCCAAAGGAGATGTACTCCGGGCTTGTTACGACCTACCGTGTAAGTC  
+

:FF:FFFF,F:FFFFFF,FF:FFFFFFFF:FFFFFFFFFF:FFFFFFFF:F:FFFF:,FFF:FFF:FF  
:FFF::F:,FFFFFFFF,FFFFFF:F,F:FFFF,FF,FFFFFFFFFFFF:FFFFFFFFFFFF:F  
@A00155:342:HHGFNDSXY:1:1657:10782:7607 1:N:0:GAACCTAG+TCCGCATA  
CAATGCCGAGAGGGATGTGGAGGGCGAGAGAGCGACTTCTCTCGGGCCCACAGCCTTACAGCTGTG  
GAGCACGGTATCCTCTGCCGAAACAGAGGTTGGACAAGACCGGAGGGGTACCTAGTTCCAAAGGAGA  
+  
FFFFFFFFFFFFFFFFFFFFFFFFFFFFFFFFFFFFFFFFFFFFFFFFFFFFFFFFFFFFFFFFFFFF  
FFFFFFFF:FFFFFFFFFFFFFFFFFFFFFFFFFFFF::,,F:,F,,,F,FF,F:, :FFFFFF:F:F  
@A00155:342:HHGFNDSXY:1:1657:3387:19977 1:N:0:GAACCTAG+TCCGCATA  
CTGTGTCCACTTAAGGACTCACCTCTGGCCTATGGTCATCTCAATGCCGAGAGGGATGTGGAGGGCGA  
GAGAGAGCGACTTCTCTCGGGCCCACAGCCTTACAGCTGTGGAGCACGGTATCCTCTGCCGAAACAGA  
+  
FFFFFFFFFFFFFFFFFFFFFFFFFFFFFFFFFFFFFFFFFFFFFFFFFFFFFFFFFFFFFFFFFFFF  
FFFFFFFFFFFFFFFFFFFFFFFFFFFF:FFFFFFFF:FFFFFFFFFFFFFFFFFFFFFFFFFFFFFFFF  
@A00155:342:HHGFNDSXY:1:1657:16251:32111 1:N:0:GAACCTAG+TCCGCATA  
TCGGCAGAGGATACCGTGCTCCACAGCTGTAAGGCTGTGGGCCCGAGAGAAGTCGCTCTCTCTCGCCC  
TCTACATCCCTCTCGGCATTGAGATGACCATAGGCCAGAGGTGAGTCCTTAAGTGGACACA  
+  
FFFFFFFFFFFFFFFFFFFFFFFFFFFFFFFFFFFFFFFFFFFFFFFFFFFFFFFFFFFFFFFFFFFF:  
FFFFFFFFFFFFFFFFFFFF:FFFFFFFFFFFFFFFFFFFFFFFFFFFFFFFFFFFFFFFFFFFFF  
@A00155:342:HHGFNDSXY:1:1657:9715:32471 1:N:0:GAACCTAG+TCCGCATA  
CTTCTCTCGGGCCCACAGCCTTACAGCTGTGGAGCACGGTATCCTCTGCCGAAACAGAGGTTGGACAA  
GACCGGAGGGGTCTCCTAGTTCCAAAGGAGATGTACTCCGGGCTTGTTACGACCTACCGTGTAAGTC  
+  
FFFFFFFFFFFFFFFFFFFFFFFFFFFF:FFFFFFFFFFFFFFFFFFFFFFFFFFFF,FFFFFFFFFFFFFFFF  
FFFFFFFFFFFFFFFFFFFFFFFFFFFFFFFFFFFF,FFFFFFFFFFFF:FFFFFFFFFFFFFFFFFFFFF  
@A00155:342:HHGFNDSXY:1:1658:29731:17848 1:N:0:GAACCTAG+TCCGCATA  
GATCAGCTGTGTCCACTTAAGGACTCACCTCTGGCCTATGGTCATCTCAATGCCGAGAGGGATGTGAA  
GGGCGAGAGAGAGCGACTTCTCTCGGGCCCACAGCCTTACAGCTGTGGAGCACGGTATCCTCTGCCGA  
+  
FFFFFFFFFFFFFFFFFFFFFFFFFFFFFFFFFFFFFFFFFFFFFFFFFFFFFFFFFFFFFFFFFFFF  
FFFFFFFFFFFFFFFFFFFFFFFFFFFFFFFFFFFFFFFFFFFFFFFFFFFFFFFFFFFFFFFFFFFFF  
@A00155:342:HHGFNDSXY:1:1659:7383:7232 1:N:0:GAACCTAG+TCCGCATA  
GTCATCTCAATGCCGAGAGGGATGTGGAGGGCGAGAGAGAGCGACTTCTCTCGGGCCCACAGCCTTAC  
AGCTGTGGAGCACGGTATCCTCTGCCGAAACAGAGGTTGGACAAGACCGGAGGGGTCTCCTAGTTCCA  
+  
FFFFFFFFFFFFFFFFFFFFFFFFFFFF:FF,FFFFFFFF:FFFFFFFFFFFF,FFFFFFFFFFFFFFFFFFFF  
:FFFFFF:FFFFFFFFFFFFFFFFFFFFFFFFFFFFFFFFFFFFFFFFFFFFFFFFFFFFFFFFFFFFF  
@A00155:342:HHGFNDSXY:1:1659:13458:18537 1:N:0:GAACCTAG+TCCGCATA  
GAGCGACTTCTCTCGGGCCCACAGCCTTACAGCTGTGGAGCACGGTATCCTCTGCCGAAACAGAGGTT  
GGACAAGACCGGAGGGGTCTCCTAGTTCCAAAGGAGATGTACTCCGGGCTTGTTACGACCTACCGTG  
+  
FFFFFFFFFFFFFFFFFFFFFFFFFFFFFFFFFFFFFFFFFFFFFFFFFFFFFFFFFFFFFFFFFFFF  
FFFFFFFFFFFFFFFFFFFFFFFFFFFFFFFFFFFFFFFFFFFFFFFFFFFFFFFFFFFFFFFFFFFFF  
@A00155:342:HHGFNDSXY:1:1660:5141:2691 1:N:0:GAACCTAG+TCCGCATA  
ACCTCTGTTTCGGCAGAGGATACCGTGCTCCACAGCTGTAAGGCTGTGGGCCCGAGAGAAGTCGCTCT  
CTCTCGCCCTTACATCCCTCTCGGCATTGAGATGACCATAGGCCAGAGGTGAGTCCTTAAGTGGACA  
+  
FFFFFFFFFFFFF:FFFFFFFFFFFF:FF,FFFFF:FFFFFFFFFFFFF:F:F::FFFFFFFFFFFFFFFF  
FFFFFFFF:FFFFFFFFFFFFFFFFFFFFFFFFFFFFFFFFFFFF:FF,FFFFFFFFFFFF:FFFF:FFFFF:  
@A00155:342:HHGFNDSXY:1:1660:2293:19366 1:N:0:GAACCTAG+TCCGCATA  
GGCAGAGGATACCGTGCTCCACAGCTGTAAGGCTGTGGGCCCGAGAGAAGTCGCTCTCTCTCGCCCTT  
CACATCCCTCTCGGCATTGAGATGACCATAGGCCAGAGGTGAGTCCTTAAGTGGAC  
+

FF:FF:FFFFFFFF:FF:FFFFFFFFFFFFFF:FFFF:FFFFFFFFFFFFFFFFFFFFFFFFFFFFFFF  
FFFFFFFFFFFFFF:FFFF,:FFFF:FFFFFFFFFFFFFFFFFFFFFFFFFFFFFF:FFFF  
@A00155:342:HHGFNDSXY:1:1660:21287:19914 1:N:0:GAACCTAG+TCCGCATA  
TGTCCACTTAAGGACTCACCTCTGGCCTATGGTCATCTCAATGCCGAGAGGGATGTGAAGGGCGAGAG  
AGAGCGACTTCTCTCGGGCCACAGCCTTACAGCTGTGGAGCACGGTATCCTCTGCCGAAACAGAGGT  
+  
FFFFFFFFFFFFFFFFFFFFFFFFFFFFFFFFFFFFFFFFFFFFFFFFFFFFFFFFFFFFFFFFFFFFFFF  
FFFFFFFFFFFFFFFFFFFFFFFFFFFFFFFFFFFFFFFFFFFFFFFFFFFFFFFFFFFFFFFFFFFFFFF,FFFFFFFFFFFFFFFFFFFFFFFFF  
@A00155:342:HHGFNDSXY:1:1660:10999:20102 1:N:0:GAACCTAG+TCCGCATA  
TTAAGGACTCACCTCTGGCCTATGGTCATCTCAATGCCGAGAGGGATGTAGAGGGCGAGAGAGAGCGA  
CTTCTCTCGGGCCACAGCCTTACAGCTGTGGAGCACGGTATCCTCTGCCGAAACAGAGGTTGGACAA  
+  
FFFFFFFFFFFFFFFFFFFFFF:FFFFFFF:FFFFFFFF:FFFFFFFFFFFFFFFF:FFFFFF:FFFFFF  
FFFFFFFFF,FFFF:FF:FFFFFF:FFFFF:FFFFFFFFFFFFFFFFFFFFFF,FF:FF:FFFFFF  
@A00155:342:HHGFNDSXY:1:1661:24849:8296 1:N:0:GAACCTAG+TCCGCATA  
AGAGAGAGCGACTTCTCTCGGGCCACAGCCTTACAGCTGTGGAGCACGGTATCCTCTGCCGAAACAG  
AGGTTGGACAAGACCGGAGGGGTCTCCTAGTTCCAAAGGAGATGTACTCCGGGCTTGTTACGACCTA  
+  
FFFFFFFFFFFFFFFFFFFFFFFFFFFFFFFFFFFFFFFFFFFFFFFFFFFFFFFFFFFFFFFFFFFFFFF  
FFFFFFFFFFFFFFFFFFFFFFFFFFFFFFFFFFFFFFFFFFFFFFFFFFFFFFFFFFFFFFFFFFFFFFF:FFFFFFFFFFFFFFFFFFFFFFF  
@A00155:342:HHGFNDSXY:1:1661:18376:17065 1:N:0:GAACCTAG+TCCGCATA  
GTCATCTCAATGCCGAGAGGGATGTGGAGGGCGAGAGAGAGCGACTTCTCTCGGGCCACAGCCTTAC  
AGCTGTGGAGCACGGTATCCTCTGCCGAAACAGAGGTTGGACAAGACCGGAGGGGTCTCCTAGTTCCA  
+  
FFFFFFFFFFFFFFFFFFFFFFFFFFFFFF:FFFFFFFFFFFFFFFFFFFFFFFFFFFFFFFFFFFFFFFFF  
FFFFFFFFFFFFFFFFFFFFFFFFFFFFFFFFFFFFFFFFFFFFFFFFFFFFFFFFFFFFFFFFFFFFFFF  
@A00155:342:HHGFNDSXY:1:1661:26078:18881 1:N:0:GAACCTAG+TCCGCATA  
CCAACCTCTGTTTCGGCAGAGGATACCGTGCTCCACAGCTGTAAGGCTGTGGGGCCGAGAGAAGTCGC  
TCTCTCTCGCCCTTACATCCCTCTCGGCATTGAGATGACCATAGGCCAGAGGTGAGTCCTTAAGTGG  
+  
FFFFFFFFFFFFFFFFFFFFFFFFFFFFFFFFFFFFFFFFFFFFFFFFFFFFFFFFFFFFFFFFFFFFFFF  
FFFFFFFFFFFFFFFFFFFFFFFFFFFFFFFFFFFFFFFFFFFFFFFFFFFFFFFFFFFFFFFFFFFFFFF:FFFFF,FFFFFFFFFFFFFFFFF  
@A00155:342:HHGFNDSXY:1:1661:27064:19116 1:N:0:GAACCTAG+TCCGCATA  
CTTCTCTCGGGCCACAGCCTTACAGCTGTGGAGCACGGTATCCTCTGCCGAAACAGAGGTTGGACAA  
GACCGGAGGGGTCTCCTAGTTCCAAAGGAGATGTACTCCGGGCTTGTTACGACCTACCGTGTAAGTC  
+  
FFFFFFFFFFFFFFFFFFFFFFFFFFFFFFFFFFFFFFFFFFFFFFFFFFFFFFFFFFFFFFFFFFFFFFF  
:FFFFFFFFFFFFFFFFFFFFFFFFFFFFFFFFFFFFFFFFFFFFFF:FFFFFFFFFFFFFFFFFFFFFFFFF  
@A00155:342:HHGFNDSXY:1:1661:22453:20807 1:N:0:GAACCTAG+TCCGCATA  
GACTTCTCTCGGGCCACAGCCTTACAGCTGTGGAGCACGGTATCCTCTGCCGAAACAGAGGTTGGAC  
AAGACCGGAGGGGTCTCCTAGTTCCAAAGGAGATGTACTCCGGGCTTGTTACGACCTACCGTGTAAG  
+  
FFF:FFFFFFFFFFFFFFFFFFFFFFFFFFFFFFFFFFFFFFFFFFFFFFFFFFFFFFFFFFFFFFFFF  
FFFFFFFFFFFFFFFFFFFFFFFFFFFFFFFFFFFFFFFFFFFFFFFFFFFFFFFFFFFFFFFFFFFFFFF,FFFFFFFFF,FFFFFFFFFFFFFFFFF:  
@A00155:342:HHGFNDSXY:1:1661:13304:28322 1:N:0:GAACCTAG+TCCGCATA  
TGGTCATCTCAATGCCGAGAGGGATGTGGAGGGCGAGAGAGAGCGACTTCTCTCGGGCCACAGCCTT  
ACAGCTGTGGAGCACGGTATCCTCTGCCGAAACAGAGGTTGGACAAGACCGGAGGGGTCTCCTGGTTC  
+  
FFFFFFFFFFFFFFFFFFFFFFFFFFFFFFFFFFFFFFFFFFFFFFFFFFFFFFFFFFFFFFFFFFFFFFF  
FFFFFFF:FFFFFFFFFFFFFFFFFFFFFFFFFFFFFFFFFFFFFFFFFFFFFFFFFFFFFFFFFFFFFFFFF  
@A00155:342:HHGFNDSXY:1:1662:26901:17957 1:N:0:GAACCTAG+TCCGCATA  
CCTCTGGCCTATGGTCATCTCAATGCCGAGAGGGATGTGAAGGGCGAGAGAGAGCGACTTCTCTCGGG  
CCACAGCCTTACAGCTGTGGAGCACGGTATCCTCTGCCGAAACAGAGGTTGGACAAGACCGGAGGGG  
+

FFFFFFFFFFFFFFFFFFFFFFFFFFFFFFFFFFFFFFFFFFFFFFFFFFFFFFFFFFFFFFFFFFFFFFFFFFFFFFFFFFFF:FFFFFFFFFFFFFFFF  
FFFFFFFFFFFFFFFFFFFFFFFFFFFFFFFFFFFFFFFFFFFFFFFFFFFFFFFFFFFFFFFFFFFFFFFFFFFFFFFFFFFF:FFFFFFFFFFFFFFFF  
@A00155:342:HHGFNDSXY:1:1662:14262:36933 1:N:0:GAACCTAG+TCCGCATA  
CACAGCCTTACAGCTGTGGAGCACGGTATCCTCTGCCGAAACAGAGGTTGGACAAGACCGGAGGGGTA  
TCCTAGTTCCAAAGGAGATGTACTCCGGGCTTGTTACACGACCTACCGTGTAAGTCGTAGTCTAGTAGG  
+  
FFFFFFFFFFFFFFFFFFFFFFFFFFFFFFFFFFFFFFFFFFFFFFFFFFFFFFFFFFFFFFFFFFFFFFFFFFFFFFFFFFFF:FFFFFFFFFFFFFFFF  
FFFFFFFFFFFFFFFFFFFFFFFFFFFFFFFFFFFFFFFFFFFFFFFFFFFFFFFFFFFFFFFFFFFFFFFFFFFFFFFFFFFF:FFFFFFFFFFFFFFFF  
@A00155:342:HHGFNDSXY:1:1663:6180:4867 1:N:0:GAACCTAG+TCCGCATA  
CCACATCCCTCTCGGCATTGAGATGACCATAGGCCAGAGGTGAGTCCTTCAGTGGACACAGCTGATCT  
AAGCGGTGTGGCGGGCATGGGTTTGAACCCCATGACGGTCGGAGTCTAGTAGGCTCCCTGATGAG  
+  
FFFFFFFFFFFFFFFFFFFFFFFFFFFFFFFFFFFFFFFFFFFFFFFFFFFFFFFFFFFFFFFFFFFFFFFFFFFFFFFFFFFF,FFFFFFFF:FF,F:FFFFFFFFFFFFFFFF,FFFFFFFFF:FFF,FFFF  
FFFFFFFF:FFFFFFFFFFFFFFFFFFFFFFFFFFFFFFFFFFFFFFFFFFFFFFFFFFFFFFFFFFFFFFFFFFFFFFFFFFFF:FFFFFF:FF:FFFFFFFFFFFFFFFF  
@A00155:342:HHGFNDSXY:1:1663:11831:13150 1:N:0:GAACCTAG+TCCGCATA  
ATGCCGAGAGGGATGTGGAGGGCAGAGAGAGCGACTTCTCTCGGGCCCCACAGCCTTACAGCTGTGGA  
GCACGGTATCCTCTGCCGAAACAGAGGTTGGACAAGACCGGAGGGGTCTCCTAGTTCCAAAGGAGATG  
+  
FFFFFFFFFFFFFFFFFFFFFFFFFFFFFFFFFFFFFFFFFFFFFFFFFFFFFFFFFFFFFFFFFFFFFFFFFFFFFFFFFFFF:FFFFFFFFFFFFFFFF  
FFFF:FFFFFFFFFFFFFFFFFFFFFFFFFFFFFFFFFFFFFFFFFFFFFFFFFFFFFFFFFFFFFFFFFFFFFFFFFFFF,FFFFFF:FFFFFF:FFFFFFFFFFFFFFFF  
@A00155:342:HHGFNDSXY:1:1663:24035:25927 1:N:0:GAACCTAG+TCCGCATA  
ACTTCTCTCGGGCCACAGCCTTACAGCTGTGGAGCACGGTATCCTCTGCCGAAACAGAGGTTGGACA  
AGACCGGAGGGGTCTCCTGGTTCCAAAGGAGATGTACTCCGGGCTTGTTACACGACCTACCGTGTAAGT  
+  
FFFFFFFFFFFFFFFFFFFFFFFFFFFFFFFFFFFFFFFFFFFFFFFFFFFFFFFFFFFFFFFFFFFFFFFFFFFFFFFFFFFF:FFFFFFFFFFFFFFFF  
FFFFFFFFFFFFFFFFFFFFFFFFFFFFFFFFFFFFFFFFFFFFFFFFFFFFFFFFFFFFFFFFFFFFFFFFFFFFFFFFFFFF:FFFFFFFFFFFFFFFF  
@A00155:342:HHGFNDSXY:1:1663:12310:31485 1:N:0:GAACCTAG+TCCGCATA  
CAGCCTTACAGCTGTGGAGCACGGTATCCTCTGCCGAAACAGAGGTTGGACAAGACCGGAGGGGTCTC  
CTAGTTCCAAAGGAGATGTACTCCGGGCTTGTTACACGACCTACCGTGTAAGTCGTAGTCTAGTAGGCT  
+  
FFFFFFFFFFFFFFFFFFFFFFFFFFFFFFFFFFFFFFFFFFFFFFFFFFFFFFFFFFFFFFFFFFFFFFFFFFFFFFFFFFFF:FFFFFFFFFFFFFFFF  
FFFFFFFFFFFFFFFFFFFFFFFFFFFFFFFFFFFFFFFFFFFFFFFFFFFFFFFFFFFFFFFFFFFFFFFFFFFFFFFFFFFF:FFFFFFFFFFFFFFFF  
@A00155:342:HHGFNDSXY:1:1664:3640:4601 1:N:0:GAACCTAG+TCCGCATA  
TAGGCCAGAGGTGAGTCCTTAAGTGACACAGCTGATCTAAGGCGGTGTAGCGGGGCATGGGTTTGAA  
CCCCCATGACGGTCGGAGTCTAGTAGGCTCCCTGATGAGTCCGTTCCAAGGACGAAACCGTCGTTACT  
+  
FFFFFFFFFFFFFFFF:FF:FFFF,,,:FFFFFFFF,FFFFFFFFFFFFFFFFFFFFFFFF,,:FFF:FFFFFFFF  
FFFFFFFF:FFFFFFFFFFFFFFFFFFFFFFFFFFFFFFFFFFFFFFFFFFFFFFFFFFFFFFFFFFFFFFFFFFFFFFFFFFFF,,FFFFFFFF  
@A00155:342:HHGFNDSXY:1:1665:18521:1313 1:N:0:GAACCTAG+TCCGCATA  
CTCAATGCCGAGAGGGATGTGGAGGGCGAGAGAGAGCGACTTCTCTCGGGCCCCACAGCCTTACAGCTG  
TGGAGCACGGTATCCTCTGCCGAAACAGAGGTTGGACAAGACCGGAGGGGTCTCCTAGT  
+  
FFFFF:FFFFFFFFFFFFFFFFFFFFFFFFFFFFFFFFFFFFFFFFFFFFFFFFFFFFFFFFFFFFFFFFFFFFFFFFFFFF,FFFFFFFFFFFFFFFF  
FFFFFFFFFFFFFFFFFFFFFFFFFFFFFFFFFFFFFFFFFFFFFFFFFFFFFFFFFFFFFFFFFFFFFFFFFFFFFFFFFFFF  
@A00155:342:HHGFNDSXY:1:1665:30101:23563 1:N:0:GAACCTAG+TCCGCATA  
TATCCTCTGCCGAAACAGAGGTTGGACAAGACCGGAGGGGTCTCCTGGTTCCAAAGGAGATGTACTCC  
GGGCTTGTTACACGACCTACCGTGTAAGTCGTAGTCTAGTAGGCTACCTGACGAGTCCTTTTTAGGACG  
+  
FFFFFFFFFFFFFFFFFFFFFFFFFFFFFFFFFFFFFFFFFFFFFFFFFFFFFFFFFFFFFFFFFFFFFFFFFFFFFFFFFFFF:::FFFFFFFFFFFFFFFF  
FFFF:FFF:FFFFFFFFFFFFFFFFFFFFFFFFFFFFFFFFFFFFFFFFFFFFFFFFFFFFFFFFFFFFFFFFFFFFFFFFFFFF,FFFFFFFFFFFFFFFF  
@A00155:342:HHGFNDSXY:1:1665:30291:23766 1:N:0:GAACCTAG+TCCGCATA  
GATCAGCTGTGTCCACTTAAGGACTCACCTCTGGCCTATGGTCATCTCAATGCCGAGAGGGATGTGAA  
GGGCGAGAGAGAGCGACTTCTCTCGGGCCCCACAGCCTTACAGCTGTGGAGCACGGTATC



FFFFFFFFFFFFFFFFFFFFFFFFFFFFFFFFFFFFFFFFFFFFFFFFFFFFFFFFFFFFFFFFFFFFFFFF  
FFFFFFFFFFFFFFFFFFFFFFFFFFFFFFFFFFFFFFFFFFFFFFFFFFFFFFFFFFFFFFFFFFFFFFFF  
@A00155:342:HHGFNDSXY:1:1665:5547:34804 1:N:0:GAACCTAG+TCCGCATA  
CTTCTCTCGGGCCACAGCCTTACAGCTGTGGAGCACGGTATCCTCTGCCGAAACAGAGGTTGGACAA  
GACCGGAGGGGTCTCCTGGTTCCAAAGGAGATGTACTCCGGGCTTGTTACGACCTACCGTGTAAGTC  
+  
FFFFFFFFFFFFFFFFFFFFFFFFFFFFFFFFFFFFFFFFFFFFFFFFFFFFFFFFFFFFFFFFFFFFFFFF  
FFFFFFFFFFFFFFFFFFFFFFFFFFFFFFFFFFFFFFFFFFFFFFFFFFFFFFFFFFFFFFFFFFFFFFFF  
@A00155:342:HHGFNDSXY:1:1666:27914:4022 1:N:0:GAACCTAG+TCCGCATA  
TGCCGAGAGGGATGTGGAGGGCGAGAGAGAGCGACTTCTCTCGGGCCACAGCCTTACAGCTGTGGAG  
CACGATATCCTCTGCCGAAACAGAGGTTGGACAAGACCGGAGGGGTCTCCTAGTTCCAAAGGAGATGT  
+  
FFFFFFFFFFFFFF:FFFFFFFFFFFFFFFFFFFFFFFFFFFFFFFFFFFFFFFFFFFFFFFFFFFFFFFF  
FFFFFFFFFFFFFFFFFFFFFFFFFFFFFFFFFFFFFFFFFFFFFFFFFFFFFFFFFFFFFFFFFFFFFFFF  
@A00155:342:HHGFNDSXY:1:1666:6253:10441 1:N:0:GAACCTAG+TCCGCATA  
CTCAATGCCGAGAGGGATGTGGAGGGCGAGAGAGAGCGACTTCTCTCGGGCCACAGCCTTACAGCTG  
TGGAGCACGGTATCCTCTGCCGAAACAGAGGTTGGACAAGACCGGAGGGGTCTCCTAGTTCCAAAGGA  
+  
FFFFFFFFFFFFFF:F,FF:FFFFFFFF,F:FFF:FFFFFFFFFFFFFFFFFFFFFFFFFFFFFFFF  
:FFFFFFFFFFFFFFFFFFFFFFFFFFFFFFFFFFFFFFFFFFFFFFFFFFFFFFFFFFFFFFFFFFFF  
@A00155:342:HHGFNDSXY:1:1666:29279:18161 1:N:0:GAACCTAG+TCCGCATA  
ATCTCAATGCCGAGAGGGATGTGGAGGGCGAGAGAGAGCGACTTCTCTCGGGCCACAGCCTTACAGC  
TGTGGAGCACGGTATCCTCTGCCGAAACAGAGGTTGGACAAGACCGGAGGGGTCTCCTGGTTCCAAAG  
+  
FFF:FFFFFFFFFFFFFF:FFFFFFFF:FFFFFFFFFFFFFFFFFFFFFFFF:FFF::F:FFFFFFFFFFFF  
FFFFFFF::FFFFF:FFFFFFFFFFFFFFFFFFFFFFFFFFFFFFFFFFFFFFFF,FFFFFFFFFFFFFFFFFFFFF  
@A00155:342:HHGFNDSXY:1:1666:17363:19038 1:N:0:GAACCTAG+TCCGCATA  
GCGACTTCTCTCGGGCCACAGCCTTACAGCTGTGGAGCACGGTATCCTCTGCCGAAACAGAGGTTGG  
ACAAGACCGGAGGGGTCTCCTAGTTCCAAAGGAGATGTACTCCGGGCTTGTTACGACCTACCGTGTA  
+  
FFFFFFFFFFFFFFFFFFFFFFFFFFFFFFFFFFFFFFFFFFFFFFFFFFFFFFFFFFFFFFFFFFFFFFFF  
FFFFFFFFFFFFFFFFFFFFFFFFFFFFFFFFFFFFFFFFFFFFFFFFFFFFFFFFFFFFFFFFFFFFFFFF  
@A00155:342:HHGFNDSXY:1:1667:6126:1799 1:N:0:GAACCTAG+TCCGCATA  
CTTCTCTCGGGCCACAGCCTTACAGCTGTGGAGCACGGTATCCTCTGCCGAAACAGAGGTTGGACAA  
GACCGGAGGGGTCTCCTGGTTCCAAAGGAGATGTACTCCGGGCTTGTTACGACCTACCGTGTAAGTC  
+  
FFFFFFFFFFFF:FFFFFFFFFFFF:FFFFFFFFFFFFFFFFFFFFFFFFFFFFFFFFFFFFFFFFFFFF  
FFFFFFFFFFFFFFFFFFFFFFFFFFFFFFFFFFFFFFFF:FFFFFFFF:FFFF:FFFFFFFF:FFFFFFFFFFFF,FFFFFF  
@A00155:342:HHGFNDSXY:1:1667:3477:30467 1:N:0:GAACCTAG+TCCGCATA  
GGGCGAGAGAGAGCGACTTCTCTCGGGCCACAGCCTTACAGCTGTGGAGCACGGTATCCTCTGCCGA  
AACATAGGTTGGACAAGACCGGAGGGGTCTCCTAGTTCCAAAGGAGATGTACTCCGGGCTTGTTACG  
+  
FFFFFFFFFFFFFFFFFFFFFFFFFFFFFFFFFFFFFFFFFFFFFFFFFFFFFFFFFFFFFFFFFFFFFFFF  
FFFFFFF:F:FFFFFFFFFFFFFFFFFFFFFFFFFFFFFFFF,FFFFFFFFFFFFFFFFFFFFFFFFFFFFF  
@A00155:342:HHGFNDSXY:1:1668:26530:3004 1:N:0:GAACCTAG+TCCGCATA  
GAGCGACTTCTCTCGGGCCACAGCCTTACAGCTGTGGAGCACGGTATCCTCTGCCGAAACAGAGGTT  
GGACAAGACCGGAGGGGTCTCCTAGTTCCAAAGGAGATGTACTCCGGGCTTGTTACGACCTACCGTG  
+  
FFFFFFFFFFFFFFFFFFFFFFFFFFFFFFFFFFFFFFFFFFFFFFFFFFFFFFFFFFFFFFFFFFFFFFFF  
FFFFFFFFFFFFFFFFFFFFFFFFFFFFFFFFFFFFFFFFFFFFFFFFFFFFFFFFFFFFFFFFFFFFFFFF:FFF  
@A00155:342:HHGFNDSXY:1:1668:24632:16250 1:N:0:GAACCTAG+TCCGCATA  
GGGCGAGAGAGAGCGACTTCTCTCGGGCCACAGCCTTACAGCTGTGGAGCACGGTATCCTCTGCCGA  
AACAGAGGTTGGACAAGACCGGAGGGGTCTCCTAGTTCCAAAGGAGATGTACTCCGGGCTTGTTACG  
+

```
FFFFFFFFFFFFFFFFFFFFFFFFFFFFFFFFFFFFFFFFFFFFFFFFFFFFFFFFFFFFF:FFFFFFFFFFFFFFFFFFFFFFFFFFFFFFF  
FFFFFFFFFFFFFFFFFFFFFFFFFFFFFFFFFFFFFFFFFFFFFFFFFFFFFFFFFFFFFFFFFFFFFFFFFFFFFFFFFFFFFFFFFFFFFFFFF  
@A00155:342:HHGFNDSXY:1:1668:18466:16752 1:N:0:GAACCTAG+TCCGCATA  
CTCTATGCCGAGAGGGATGTGGAGGGCGAGAGAGAGCGACTTCTCTCGGGCCCACAGCCTTACAGCTG  
TGGAGCACGGTATCCTCTGCCGAAACAGAGGTTGGACAAGACCGGAGGGGTCTCCTAGTTCAAAGGA  
+  
FFFFFFFFFFFFFFFFFFFFFFFFFFFFFFFFFFFFFFFFFFFFFFFFFFFFFFFFFFFFFFFFFFFFFFFFFFFFFFFFFFFFFFFFFFFFF  
FFFFFFFFFFFFFFFFFFFFFFFFFFFFFFFFFFFFFFFFFFFFFFFFFFFFFFFFFFFFFFFFFFFFFFFFFFFFFFFFFFFFFFFFFFFFF  
@A00155:342:HHGFNDSXY:1:1668:13584:18067 1:N:0:GAACCTAG+TCCGCATA  
TGTGGAGGGCGAGAGAGAGCGACTTCTCTCGGGCCCACAGCCTTACAGCTGTGGAGCACGGTATCCTC  
TGCCGAAACAGAGGTTGGACAAGACCGGAGGGGTCTCCTAGTTCAAAGGAGATGTACT  
+  
FFFFFFFFF:FFFFFFFFFFFFFFFFFFFFFFFFFFFFFFFFFFFFFFFFFFFFFFFFFFFFFFFFFFFFFFFFFFFFFFFFFFFFFFFFFFFFF  
FFFFFFFFFFFFFFFFFFFFFFFFFFFFFFFFFFFFFFFFFFFFFFFFFFFFFFFFFFFFFFFFFFFFFFFFFFFFFFFFFFFFFFFFFFFFF  
@A00155:342:HHGFNDSXY:1:1668:13648:18082 1:N:0:GAACCTAG+TCCGCATA  
TGTGGAGGGCGAGAGAGAGCGACTTCTCTCGGGCCCACAGCCTTACAGCTGTGGAGCACGGTATCCTC  
TGCCGAAACAGAGGTTGGACAAGACCGGAGGGGTCTCCTAGTTCAAAGGAGATGTACT  
+  
FF,FFFFFFFFFFFFFFFFFFFFFFFFFFFFFFFFFFFFFFFFFFFFFFFFFFFFFFFFFFFFFFFFFFFFFFFFFFFFFFFFFFFFFFFFFFF  
FFFFFFFFFFFFFFFFFFFFFFFFFFFFFFFFFFFFFFFFFFFFFFFFFFFFFFFFFFFFFFFFFFFFFFFFFFFFFFFFFFFFFFFFFFFFF:FF  
@A00155:342:HHGFNDSXY:1:1668:11758:19664 1:N:0:GAACCTAG+TCCGCATA  
TGTGGAGGGCGAGAGAGAGCGACTTCTCTCGGGCCCACAGCCTTACAGCTGTGGAGCACGGTATCCTC  
TGCCGAAACAGAGGTTGGACAAGACCGGAGGGGTCTCCTAGTTCAAAGGAGATGTACT  
+  
FFFFFFFFFFFFFFFFFFFFFFFFFFFFFFFFFFFFFFFFFFFFFFFFFFFFFFFFFFFFFFFFFFFFFFFFFFFFFFFFFFFFFFFFFFFFF  
FFFFFFFFFFFFFFFFFFFFFFFFFFFFFFFFFFFFFFFFFFFFFFFFFFFFFFFFFFFFFFFFFFFFFFFFFFFFFFFFFFFFFFFFFFFFF  
@A00155:342:HHGFNDSXY:1:1668:15311:22623 1:N:0:GAACCTAG+TCCGCATA  
GGGCGAGAGAGAGCGACTTCTCTCGGGCCCACAGCCTTACAGCTGTGGAGCACGGTATCCTCTGCCGA  
AACAGAGGTTGGACAAGACCGGAGGGGTCTCCTAGTTCAAAGGAGATGTACTCCGGGCTTGTTACAG  
+  
FFFFFFFFFFFFFFFFFFFFFFFFFFFFFFFFFFFFFFFFFFFFFFFFFFFFFFFFFFFFFFFFFFFFFFFFFFFFFFFFFFFFFFFFFFFFF:FFFFFFFFF  
FFFFFFFFFFFFFFFFF:FF:FFFFFFFFFFFFFFFFFFFFFFFFFFFFFFFFFFFFFFFFFFFFFFFFFFFFFFFFFFFFFFFFFFFFFFFFF:FFFFFFF:F:  
@A00155:342:HHGFNDSXY:1:1669:29776:10723 1:N:0:GAACCTAG+TCCGCATA  
AGCGACTTCTCTCGGGCCCACAGCCTTACAGCTGTGGAGCACGGTATCCTCTGCCGAAACAGAGGTTG  
GACAAGACCGGAGGGGTCTCCTGTTCAAAGGAGATGTACTCCGGGCTTGTTACGACCTACCGTGT  
+  
FFFFFFFFFFFFFFFFFFFFFFFFFFFFFFFFFFFFFFFFFFFFFFFFFFFFFFFFFFFFFFFFFFFFFFFFFFFFFFFFFFFFFFFFFFFFF  
FFFFFFFFFFFFFFFFFFFFFFFFFFFFFFFFFFFFFFFFFFFFFFFFFFFFFFFFFFFFFFFFFFFFFFFFFFFFFFFFFFFFFFFFFFFFF  
@A00155:342:HHGFNDSXY:1:1669:30436:11835 1:N:0:GAACCTAG+TCCGCATA  
AGAGAGAGCGACTTCTCTCGGGCCCACAGCCTTACAGCTGTGGAGCACGGTATCCTCTGCCGAAACAG  
AGGTTGGACAAGACCGGAGGGGTCTCCTAGTTCAAAGGAGATGTACTCCGGGCTTGTTACGACCTA  
+  
FFFFFFFFFFFFFFFFFFFFFFFFFFFFFFFFFFFFFFFFFFFFFFFFFFFFFFFFFFFFFFFFFFFFFFFFFFFFFFFFFFFFFFFFFFFFF  
FFFFFFFFFFFFFFFFF:FFFFFFFFFFFFFFFFFFFFFFFFFFFFFFFFFFFFFFFFFFFFFFFFFFFFFFFFFFFFFFFFFFFFFFFFF:FFFFFFFFFFFFF  
@A00155:342:HHGFNDSXY:1:1669:30960:21825 1:N:0:GAACCTAG+TCCGCATA  
GAGCGACTTCTCTCGGGCCCACAGCCTTACAGCTGTGGAGCACGGTATCCTCTGCCGAAACAGAGGTT  
GGACAAGACCGGAGGGGTCTCCTAGTTCAAAGGAGATGTACTCCGGGCTTGTTACGACCTACCGTG  
+  
FFFFFFFFFFFFFFFFFFFFFFFFFFFFFFFFFFFFFFFFFFFFFFFFFFFFFFFFFFFFFFFFFFFFFFFFFFFFFFFFFFFFFFFFFFFFF  
FF:FFFFFFFFFFFFFFFFFFFFFFFFFFFFFFFFFFFFFFFFFFFFFFFFFFFFFFFFFFFFFFFFFFFFFFFFFFFFFFFFFFFFFFFFFFFFF  
@A00155:342:HHGFNDSXY:1:1669:19714:22106 1:N:0:GAACCTAG+TCCGCATA  
GGATGTGGAGGGCGAGAGAGAGCGACTTCTCTCGGGCCCACAGCCTTACAGCTGTGGAGCACGGTATC  
CTCTGCCGAAACAGAGGTTGGACAAGACCGGAGGGGTCTCCTAGTTCAAAGGAGATGTACTCC
```

```
FFFFFFFFFFFFFFFFFFFFFFFFFFFFFFFFFFFFFFFFFFFFFFFFFFFFFFFFFFFFF:FFFFFFFFFFFFFFFFFFFFFFFFFFFFFFFFFFFFFFFFFFFFFFFFFFFFFFF  

FFFFFFFFFFFFFFFFFFFFFFFFFFFFFFFFFFFFFFFFFFFFFFFFFFFFFFFFFFFFFFFFFFFFFFFFFFFFFFFFFFFFFFFFFFFFFFFFFFFFFFFFFFFFFFFFFFFFFFFF  

@A00155:342:HHGFNDSXY:1:1669:30165:24361 1:N:0:GAACCTAG+TCCGCATA  

GAGCGACTTCTCTCGGGCCCACAGCCTTACAGCTGTGGAGCACGGTATCCTCTGCCGAAACAGAGGTT  

GGACAAGACCGGAGGGGTCTCCTAGTTCCAAAGGAGATGTACTCCGGGCTTGTTACGACCTACCGTG  

+  

FFFFFFFFFFFFFFFFFFFFFFFFFFFFFFFFFFFFFFFFFFFFFFFFFFFFFFFFFFFFFFFFFFFFFFFFFFFFFFFFFFFFFFFFFFFFFFFFFFFFFFFFFFFFFFFF  

FFFFFFFFFFFFFFFFFFFFFFFFFFFFFFFFFFFFFFFFFFFFFFFFFFFFFFFFFFFFFFFFFFFFFFFFFFFFFFFFFFFFFFFFFFFFFFFFFFFFFFFFFFFFFFFF  

@A00155:342:HHGFNDSXY:1:1669:27733:29888 1:N:0:GAACCTAG+TCCGCATA  

AGAGAGAGCGACTTCTCTCGGGCCCACAGCCTTACAGCTGTGGAGCACGGTATCCTCTGCCGAAACAG  

AGGTTGGACAAGACCGGAGGGGTCTCCTAGTACC AAAGGAGATGTACTCCGGGCTTGTTACGACCTA  

+  

F,F:FFFFFFFFFFFFFFFF,F:FFFFFFFF:F::FFF:F:FFFF:FFFF,: ,FFF:FF,F,,FFFF,  

FF:,F:FFFF:F,F:FFF,,,FFFF:FF,,,FFFF:,FFFFFFFFFFFFFFFF, :FFF:F,:F:F::FFF  

@A00155:342:HHGFNDSXY:1:1670:6795:9659 1:N:0:GAACCTAG+TCCGCATA  

CTCTGGCCTATGGTCATCTCAATGCCGAGAGGGATGTGAAGGGCGAGAGAGAGCGACTTCTCTCGGGC  

CCACAGCCTTACAGCTGTGGAGCACGGTATCCTCTGCCGAAACAGAGGTTGGACAAGACCGGAGGGGT  

+  

FFFFFFFFFFFFFFFFFFFFFFFFFFFFFFFFFFFFFFFF:FFFF:FFFFFFFF:FFFFFFFF,FFFFFFFFFFFFFFFFFFFFFFFF:  

FFFFFFFFFFFFFFFFFFFFFFFFFFFFFFFFFFFFFFFF:FFFFFFFFFFFFFFFFFFFFFFFFFFFFFFFFFFFFFFFF  

@A00155:342:HHGFNDSXY:1:1670:28546:23249 1:N:0:GAACCTAG+TCCGCATA  

GAGAGAGCGACTTCTCTCGGGCCCACAGCCTTACAGCTGTGAAGCACGGTATCCTCTGCCGAAACAGA  

GGTTGGACAAGACCGGAGGGGTCTCCTAGTTC AAAGGAGATGTACTCCGGGCTTGTTACGACCTAC  

+  

FFFFFFFFFFFFFFFFFFFFFFFFFFFFFFFFFFFFFFFFFFFFFFFFFFFFFFFFFFFFFFFFFFFFFFFFFFFFFFFFFFFFFFFFFFFFFFFFFFFFFFFFFFFFFFFF  

FFFFF:FFFFFFFFFFFFFFFFFFFFFFFFFFFFFFFFFFFFFFFF:FFFFFFFFFFFFFFFFFFFFFFFFFFFFFFFFFFFFFFFF  

@A00155:342:HHGFNDSXY:1:1670:12373:24893 1:N:0:GAACCTAG+TCCGCATA  

CTCAATGCCGAGAGGGATGTGGAGGGCGAGAGAGAGCGACTTCTCTCGGGCCCACAGCCTTACAGCTG  

TGGAGCACGGTATCCTCTGCCGAAACAGAGGTTGGACAAGACCGGAGGGGTCTCCTAGTTC AAAGGA  

+  

FFFFFFFFFFFFFFFFFFFFFFFFFFFFFFFFFFFFFFFFFFFFFFFFFFFFFFFFFFFFFFFFFFFFFFFFFFFFFFFFFFFFFFFFFFFFFFFFFFFFFFFFFFFFFFFF  

FFFFFFFFFFFFFFFFFFFFFFFFFFFFFFFFFFFFFFFFFFFFFFFFFFFFFFFFFFFFFFFFFFFFFFFFFFFFFFFFFFFFFFFFFFFFFFFFFFFFFFFFFFFFFFFF  

@A00155:342:HHGFNDSXY:1:1671:9878:2973 1:N:0:GAACCTAG+TCCGCATA  

GGATGTAGAGGGCGAGAGAGAGCGACTTCTCTCGGGCCCACAGCCTTACAGCTGTGGAGCACGGTATC  

CTCTGCCGAAACAGAGGTTGGACAAGACCGGAGGGGTCTCCTAGTTC AAAGGAGATGTACTCC  

+  

FFFFFFFFFFFFFFFFFFFFFFFFFFFFFFFFFFFFFFFFFFFFFFFFFFFFFFFFFFFFFFFFFFFFFFFFFFFFFFFFFFFFFFFFFFFFFFFFFFFFFFFFFFFFFFFF  

FFFFFFFFFFFFFFFFFFFFFFFFFFFFFFFFFFFFFFFFFFFFFFFFFFFFFFFFFFFFFFFFFFFFFFFFFFFFFFFFFFFFFFFFFFFFFFFFFFFFFFFFFFFFFFFF  

@A00155:342:HHGFNDSXY:1:1671:3549:5165 1:N:0:GAACCTAG+TCCGCATA  

CTGCTCTCGGGCCCACAGCCTTACAGCTGTGGAGCACGGTATCCTCTGCCGAAACAGAGGTTGGACAA  

GACCGGAGGGGTCTCCTAGTTC AAAGGAGATGTACTCCGGGCTTGTTACGACCTACCGTGTAAGTC  

+  

FF,FFFFFFFFFFFFFFFF:F,FFFFFFFFFFFFFFFF,FFFFFFFFFFFF:FFFFF::FFFFFFFF:FFFFFFF  

FFFF,F,,FF:FFFFFFFFFFFFFFFFFFFFFFFFFFFFFFFFFFFFFFFF:FF,F,FFFF:F:FFFFFFFFFFFFFFFF  

@A00155:342:HHGFNDSXY:1:1671:3712:5916 1:N:0:GAACCTAG+TCCGCATA  

CTTCTCTCGGGCCCACAGCCTTACAGCTGTGGAGCACGGTATCCTCTGCCGAAACAGAGGTTGGACAA  

GACCGGAGGGGTCTCCTAGTTC AAAGGAGATGTACTCCGGGCTTGTTACGACCTACCGTGTAAGTC  

+  

FFFFFFFFFFFFFFFFFFFFFFFFFFFFFFFFFFFFFFFF:FFFFFFFFFFFFFFFFFFFFFFFFFFFFFFFFFFFFFFFFFFFFFFFFFFFFFFFFFFFFFFFF  

FFFFFFFFFFFFFFFFFFFFFFFFFFFFFFFFFFFFFFFFFFFFFFFFFFFFFFFFFFFFFFFFFFFFFFFFFFFFFFFFFFFFFFFFFFFFFFFFFFFFFFFFFFFFFFFF  

@A00155:342:HHGFNDSXY:1:1671:7482:13448 1:N:0:GAACCTAG+TCCGCATA  

GGCGAGAGAGAGCGACTTCTCTCGGGCCCACAGCCTTACAGCTGTGGAGCACGGTATCCTCTGCCGAA  

ACAGAGGTTGGACAAGACCGGAGGGGTCTCCTAGTTC AAAGGAGATGTACTCCGGGCTTGTTACGA
```

:FFFFFFFFFFFFFFFFFFFFFFFFFFFFFFFF:F:FFFFFFFFFFFFFF:FFFFFFFFFFFFFFFF  
FFFF:FFFFFFFFFFFFFFFFFFFFFFFFFFFFFFFFFFFFFFFFFFFFFFFFFFFFFFFFFFFFFFFF  
@A00155:342:HHGFNDSXY:1:1671:22489:17707 1:N:0:GAACCTAG+TCCGCATA  
ATCTCAATGCCGAGAGGGATGTGGAGGGCGAGAGAGAGCGACTTCTCTCGGGCCCACAGCCTTACAGC  
TGTGGAGCACGGTATCCTCTGCCGAAACAGAGGTTGGACAAGACCGGAGGGGTCTCCTGGTT  
+  
FFFFFFFFFFFFFFFFFFFFFF:F:FFFFFFFFFFFFFFFFFFFFFFFFFFFFFFFFFFFFFFFFFFFFFFF  
FFFFFFFFFFFFFFFFFFFFFFFFFFFFFFFFFFFFFFFFFFFFFFFFFFFFFFFFFFFFFFFFFFFFFFF  
@A00155:342:HHGFNDSXY:1:1671:15383:20932 1:N:0:GAACCTAG+TCCGCATA  
ATGCCGAGAGGGATGTGGAGGGCGAGAGAGAGCGACTTCTCTCGGGCCCACAGCCTTACAGCTGTGGA  
GCACGGTATCCTCTGCCGAAACAGAGGTTGGACAAGACCGGAGGGGTCTCCTAGTTCCAAAGGAGATG  
+  
FFFFFFFFFFFFFFFFFFFFFF:FFFFFFFFFFFFFFFFFFFFFFFFFFFFFFFFFFFFFFFFFFFFFF:FFFFFFFFFFFF  
FFFFFFFFFFFFFFFFFFFFFFFFFFFFFFFFFFFFFFFFFFFFFFFFFFFFFFFFFFFFFFFFFFFFFF:F:FFFFFFFFFFFFF  
@A00155:342:HHGFNDSXY:1:1671:14850:30874 1:N:0:GAACCTAG+TCCGCATA  
CTGTGTCCACTTAAGGACTCACCTCTGGCCTATGGTCATCTCAATGCCGAGAGGGATGTGGAGGGCGA  
GAGAGAGCGACTTCTCTCGGGCCCACAGCCTTACAGCTGTGGAGCACGGTATCCTCTGCCGAAACA  
+  
FFFFFFFFFFFFFFFFFFFFFFFFFFFFFFFFFFFFFF:FFFFFFFFFFFFFFFFFFFFFFFFFFFFFFFFFFFFFFF  
FFFFFFFFFFFFFFFFFFFFFFFFFFFFFFFFFFFFFFFFFFFFFFFFFFFFFFFFFFFFFFFFFFFFFFF  
@A00155:342:HHGFNDSXY:1:1671:17002:33724 1:N:0:GAACCTAG+TCCGCATA  
CATCTCAATGCCGAGAGGGATGTGGAGGGCGAGAGAGAGCGACTTCTCTCGGGCCCACAGCCTTACAG  
CTGTGGAGCACGGTATCCTCTGCCGTAACAGAGGTTGGACAAGACCGGAGGGGTCTCCTAGTTCCAAA  
+  
FFFFFFFFFFFFFFFFFFFFFFFFFFFFFFFFFFFFFFFFFFFFFFFFFFFFFFFFFFFFFFFFFFFFFFFFF  
FFFFFFFFFFFFFFFFFFFFFFFFFFFFFFFFFFFFFFFFFFFFFFFFFFFFFFFFFFFFFFFFFFFFFFF  
@A00155:342:HHGFNDSXY:1:1671:3115:35352 1:N:0:GAACCTAG+TCCGCATA  
ACTTCTCTCGGGCCCACAGCCTTACAGCTGTGGAGCACGGTATCCTCTGCCGAAACAGAGGTTGGACA  
AGACCGGAGGGGTCTCCTAGTTCCAAAGGAGATGTACTCCGGGCTTGTTACGACCTACC  
+  
FFFFFFFFFFF,FFFFFF:FFFF::,FFFFFF:FF,F,FF:FF:F,, :FFFF,FF:FFFF:FFFFF  
FF,FFF:FFFFFFFFFFFFFFFFFFFFFFFFFFFFFFF,F:FFFFFF:FFFF,FF:FFFFFF  
@A00155:342:HHGFNDSXY:1:1672:20021:3161 1:N:0:GAACCTAG+TCCGCATA  
GACTTCTCTCGGGCCCACAGCCTTACAGCTGTGGAGCACGGTATCCTCTGCCGAAACAGAGGTTGGAC  
AAGACCGGAGGGGTCTCCTAGTTCCAAAGGAGATGTACTCCGGGCTTGTTACGACCTACCGTGTAAG  
+  
:FFFFF,FFFFFFFFFFFFFFFF:FFF,F:F:FFFF:,FFFFF::FFF:FFF:FFFF:FFF:FFFFF  
FF:FFFFFFFFFFFFFFFFFFFFFFFFFFFFFF:FFFF:FF:FFFFFFFFFFFF:FFFFFFFFFFFFFFF,F:F  
@A00155:342:HHGFNDSXY:1:1672:24207:3302 1:N:0:GAACCTAG+TCCGCATA  
CTTCTCTCGGGCCCACAGCCTTACAGCTGTGGAGCACGGTATCCTCTGCCGAAACAGAGGTTGGACAA  
GACCGGAGGGGTCTCCTGGTTCCAAAGGAGATGTACTCCGGGCTTGTTACGACCTACCGTGTAAGTC  
+  
FFFFFFFFFFFFFFFFFFFFFFFFFFFFFFFFFFFFFFFFFFFFFF:FFFFFFFFFFFFFFFFFFFFFFFFFFFFFFF  
F:FFFFFFFFFFFFFFFFFFFFFFFFFFFFFFFFFFFFFFFFFFFFFFFFFFFFFFFFFFFFFFFFFFFFFFF  
@A00155:342:HHGFNDSXY:1:1672:14498:13322 1:N:0:GAACCTAG+TCCGCATA  
CTCAATGCCGAGAGGGATGTGGAGGGCGAGAGAGAGCGACTTCTCTCGGGCCCACAGCCTTACAGCTG  
TGGAGCACGGTATCCTCTGCCGAAACAGAGGTTGGACAAGACCGGAGGGGTCTCCTAGTTCCAAAGGA  
+  
FFFFFFFFFFFFFFFFFFFFFF:FFFFFFFFFFFFFFFFFFFFFFFFFFFFFFFFFFFFFFFFFFFFFFF  
FFFFFFFFFFFFFFFFFFFFFFFFFFFFFFFFFFFFFFFFFFFFFFFFFFFFFFFFFFFFFFFFFFFFFFF  
@A00155:342:HHGFNDSXY:1:1672:20148:14465 1:N:0:GAACCTAG+TCCGCATA  
GCTGTGTCCACTTAAGGACTCACCTCTGGCCTATGGTCATCTCAATGCCGAGAGGGATGTAGAGGGCG  
AGAGAGAGCGACTTCTCTCGGGCCCACAGCCTTACAGCTGTGGAGCACGGTATCCTCTGCCGAAACAG  
+

FFFFFFFFFFFFFFFFFFFFFFFFFFFFFFFFFFFFFFFFFFFFFFFFFFFFFFFFFFFFFFFFFFFFFFFFFFFFFFFF  
FFFFFFFFFFFFFFFFFFFFFFFFFFFFFFFFFFFFFFFFFFFFFFFFFFFFFFFFFFFFFFFFFFFFFFFFFFFFFFFF  
@A00155:342:HHGFNDSXY:1:1672:29704:20275 1:N:0:GAACCTAG+TCCGCATA  
ATCTCAATGCCGAGAGGGATGTGGAGGGCGAGAGAGAGCGACTTCTCTCGGGCCCACAGCCTTACAGC  
TGTGGAGCACGGTATCCTCTGCCGAAACAGAGGTTGGACAAGACCGGAGGGGTCTCCTAGTTCCAAAG  
+  
FFFFFFFFFFFFFFFF,FFFFFFFF:FFFFFFFFFFFFFFFFFFFFFFFFFFFFFFFF:FFFF:FFFF  
FFFFFFFFFFFFFFFFFFFFFFFFFFFFFFFF:FFFFFFFFFFFFFFFF,FFFFFFFFFFFFFFFFFFFFFFFF:FF  
@A00155:342:HHGFNDSXY:1:1672:11044:28322 1:N:0:GAACCTAG+TCCGCATA  
CTTCTCTCGGGCCCACAGCCTTACAGCTGTGGAGCACGGTATCCTCTGCCGAAACAGAGGTTGGACAA  
GACCGGAGGGGTCTCCTAGTTCCAAAGGAGATGTACTCCGGGCTTGTTACGACCTACCGTGTAAGTC  
+  
FFFFFFFFFFFFFFFFFFFFFFFFFFFFFFFFFFFFFFFFFFFFFFFFFFFFFFFFFFFFFFFFFFFFFFFF:FFFFFFFF:FFFF  
:FFFFFFFFFFFFFFFFFFFFFFFFFFFFFFFFFFFFFFFFFFFFFFFFFFFFFFFFFFFFFFFF:FFFFF,FFFFFFFF  
@A00155:342:HHGFNDSXY:1:1672:25229:32878 1:N:0:GAACCTAG+TCCGCATA  
ATGACCATAGGCCAGAGGTGAGTCCTTAAGTGGACACAGCTGATCTAAGGCGGTGTGGCGGGGCATGG  
GTTTGAACCCCATGACGGTCGGAGTCTAGTAGGCTTCTGATGAGTCCGTTCCAAGGACGAAACCGT  
+  
FFFFFFFFFFFFFFFFFFFFFFFFFFFFFFFFFFFFFFFFFFFFFFFFFFFFFFFFFFFFFFFFFFFFFFFFFFFF  
FFFFFFFFFFFFFFFFFFFFFFFFFFFFFFFFFFFFFFFF:FFFFF,FFFFFFFFFFFFFFFFFFFFFFFF:FFFF  
@A00155:342:HHGFNDSXY:1:1672:9390:35790 1:N:0:GAACCTAG+TCCGCATA  
GACTTCTCTCGGGCCCACAGCCTTACAGCTGTGGAGCACGGTATCCTCTGCCGAAACAGAGGTTGGAC  
AAGACCGGAGGGGTCTCCTAGTTCCAAAGGAGATGTACTCCGGGCTTGTTACGACCTACCGTGTAAG  
+  
FFFFFFFFFFFFFFFFFFFFFFFFFFFFFFFFFFFFFFFFFFFFFFFFFFFFFFFFFFFFFFFFFFFFFFFFFFFF  
FFFFFFFFFFFFFFFFFFFFFFFFFFFFFFFFFFFFFFFFFFFFFFFFFFFFFFFFFFFFFFFFFFFFFFFF:FFFFFFFFFFFFFFFF  
@A00155:342:HHGFNDSXY:1:1673:9326:4460 1:N:0:GAACCTAG+TCCGCATA  
ATCTCAATGCCGAGAGGGATGTAGAGGGCGAGAGAGAGCGACTTCTCTCGGGCCCACAGCCTTACAGC  
TGTGGAGCACGGTATCCTCTGCCGAAACAGAGGTTGGACAAGACCGGAGGGGTCTCCTAGTTCCAAAG  
+  
FFFFFFFFFFFFFFFFFFFFFFFFFFFFFFFFFFFFFFFFFFFFFFFFFFFFFFFFFFFFFFFFFFFFFFFFFFFF  
FFFFFFFFFFFFFFFFFFFFFFFFFFFFFFFFFFFFFFFFFFFFFFFFFFFFFFFFFFFFFFFFFFFFFFFFFFFF  
@A00155:342:HHGFNDSXY:1:1673:27118:4648 1:N:0:GAACCTAG+TCCGCATA  
GCTGTGTCCACTTAAGGACTCACCTCTGGCCTATGGTCATCTCAATGCCGAGAGGGATGTGAAGGGCG  
AGAGAGAGCGACTTCTCTCGGGCCCACAGCCTTACAGCTGTGGAGCACGGTATCCTCTGCCGAAACAG  
+  
FF:FFFFFFFFFFFFFFFFFFFFFFFFFFFFFFFF:FFFFFFFFFFFFFFFFFFFFFFFF:FFFFFFFF,FFFFFFFF  
FFFFFFFFFFFFFFFFFFFFFFFFFFFFFFFFFFFFFFFFFFFFFFFFFFFFFFFFFFFFFFFFFFFFFFFFFFFF  
@A00155:342:HHGFNDSXY:1:1673:18710:4930 1:N:0:GAACCTAG+TCCGCATA  
GGATGTGGAGGGCGAGAGAGAGCGACTTCTCTCGGGCCCACAGCCTTACAGCTGTGGAGCACGGTATC  
CTCTGCCGAAACAGAGGTTGGACAAGACCGGAGGGGTCTCCTAGTTCCAAAGGAGATGTACTCC  
+  
FFF:FFFFFFFFFFFFFFFFFFFFFFFFFFFFFFFFFFFFFFFFFFFFFFFFFFFFFFFFFFFFFFFFFFFFFFFF  
FFFFFFFFFFFFFFFFFFFFFFFFFFFFFFFFFFFFFFFFFFFFFFFFFFFFFFFFFFFFFFFFFFFFFFFFFFFF  
@A00155:342:HHGFNDSXY:1:1673:32524:4993 1:N:0:GAACCTAG+TCCGCATA  
AGAGAGAGCGACTTCTCTCGGGCCCACAGCCTTACAGCTGTGGAGCACGGTATCCTCTGCCGAAACAG  
AGGTTGGACAAGACCGGAGGGGTCTCCTAGTTCCAAAGGAGATGTACTCCGGGCTTGTTACGACCT  
+  
FFFFFFFFF:FFFFFFFFFFFFFFFFFFFFFFFF, :FFFFFFFFFFFFFFFF:FFFFFFFFFFFFFFFFFFFF  
FFF,FFFFFFFF:FFF:FFFFFFFFFFFFFFFF:FFFFFFFFF:FFFFFFFF:F:FFFFFFFF:FFFFF  
@A00155:342:HHGFNDSXY:1:1673:25238:6370 1:N:0:GAACCTAG+TCCGCATA  
CTTCTCTCGGGCCCACAGCCTTACAGCTGTGGAGCACGGTATCCTCTGCCGAAACAGAGGTTGGACAA  
GACCGGAGGGGTCTCCTAGTTCCAAAGGAGATGTACTCCGGGCTTGTTACGACCTACCGTGTAAGTC  
+

FFFFFFFFFFFFFFFFFFFFFFFFFF:FFFFFFFFFFFFFFFFFFFFFFFFFFFFFFFFFFFFFFFF:FFFFFFFFFFFFFFFF:FFFFFFFFFFFF  
 FFFFFFFFFFFFFFFFFFFFFFFFFF:FFFFFFFFFFFFFFFFFFFFFFFFFFFFFFFF:FFFFFFFFFFFFFF,FFFFFFFF  
 @A00155:342:HHGFNDSXY:1:1673:7048:31391 1:N:0:GAACCTAG+TCCGCATA  
 GAGGGCGAGAGAGAGCGACTTCTCTCGGGCCACAGCCTTACAGCTGTGGAGCACGGTATCCTCTGCC  
 GAAACAGAGGTTGGACAAGACCGGAGGGGTCTCCTAGTTCCAAAGGAGATGTACTCCGGGCTTGTTCA  
 +  
 FFFFFFFFFFFFFFFFFF:FFF:FFFFFFFFF,,F,F,FFFFFFFFFFFF,,FFFFFF:FFFFFFFFFFFF  
 FFFF:FFFF:FF:FFFFFFFFFFFFFFFFFFFFFFFF,FFFFFFFFFFFFFFFFFFFFFFFF:FFFFFFFF  
 @A00155:342:HHGFNDSXY:1:1674:7455:5635 1:N:0:GAACCTAG+TCCGCATA  
 AGCGACTTCTCTCGGGCCACAGCCTTACAGCTGTGGAGCACGGTATCCTCTGCCGAAACAGAGGTTG  
 GACAAGACCGGAGGGGTCTCCTAGATCCAAAGGAGATGTACTCCGGGCTTGTTACGACCTACCGTGT  
 +  
 FFFFFFFFFFFFFFFFFF:FFFFFFFF:FFFFFFFFFFFFFFFF,FFFFF,FFFFFFFFFFFFFFFFFFFF:FFFFF  
 FFFFF:FFFFFFFFFFFFFFFFFFFF,FFFFF:FFFFFFFFFFFFFFFF, :FFF,FF:F:FFFFFFFF, :F  
 @A00155:342:HHGFNDSXY:1:1674:25545:8375 1:N:0:GAACCTAG+TCCGCATA  
 GTCATCTCAATGCCGAGAGGGATGTGGAGGGCGAGAGAGAGCGACTTCTCTCGGGCCACAGCCTTAC  
 AGCTGTGGAGCACGGTATCCTCTGCCGAAACAGAGGTTGGACAAGACCGGAGGGGTCTCCTAGTTCCA  
 +  
 FFFFFFFFFFFFFFFFFFFFFFFFFF:FFFFFFFFFFFFFFFFFFFFFFFFFFFFFFFFFFFFFFFF:FFF  
 FFFFFFFFFFFFFFFFFFFFFFFFFFFFFFFFFFFFFFFFFFFFFFFFFFFFFFFFFFFFFFFFFFFFFFFFFF  
 @A00155:342:HHGFNDSXY:1:1674:3803:16908 1:N:0:GAACCTAG+TCCGCATA  
 CTTCTCTCGGGCCACAGCCTTACAGCTGTGGAGCACGGTATCCTCTGCCGAAACAGAGGTTGGACAA  
 GACCGGAGGGGTCTCCTAGTTCCAAAGGAGATGTACTCCGGGCTTGTTACGACCTACCGTGTAAGTC  
 +  
 FFFFFFFFFFFFFFFFFFFFFFFFFF: :FFFFFFFFFFFFFFFFFFFFFFFFFFFFFFFFFFFFFFFFFFFF  
 FFFFFFFFFFFFFFFFFFFFFFFFFFFFFFFFFFFFFFFFFFFFFFFFFFFFFFFFFFFFFFFFFFFFFFFFFF  
 @A00155:342:HHGFNDSXY:1:1674:23990:26099 1:N:0:GAACCTAG+TCCGCATA  
 CCGAGAGGGATGTAGAGGGCGAGAGAGAGCGACTTCTCTCGGGCCACAGCCTTACAGCTGTGGAGCA  
 CGGTATCCTCTGCCGAAACAGAGGTTGGACAAGACCGGAGGGGTCTCCTAGTTCCAAAG  
 +  
 FFFFF:FFFFFFFFFFFFFFFFFFFFFFFFFFFFFFFFFFFFFFFFFFFFFFFFFFFFFFFFFFFFFFFFFFFF  
 ,FFFFFFFF:FFFFFFFFFFFFFFFFFFFFFFFF:FFFFFFFFFFFF:FFFFFFFF:FFFFF  
 @A00155:342:HHGFNDSXY:1:1674:25084:26490 1:N:0:GAACCTAG+TCCGCATA  
 AGGGCGAGAGAGAGCGACTTCTCTCGGGCCACAGCCTTACAGCTGTGGAGCACGGTATCCTCTGCCG  
 AAACAGAGGTTGGACAAGACCGGAGGGGTCTCCTAGTTCCAAAGGAGATGTACTCCGGGCTTGTTAC  
 +  
 FFFFFFFFFFFFFFFFFF:FFFFFFFFFFFFFFFFFFFFFFFFFFFFFFFFFFFFFFFF:F:FFFFFFFFFFFF  
 FFFFFFFFFFFFFFFFFFFFFFFFFFFFFFFFFFFFFFFFFFFFFFFFFFFFFFFFFFFFFFFFFFFFFFFFFF  
 @A00155:342:HHGFNDSXY:1:1674:15691:26663 1:N:0:GAACCTAG+TCCGCATA  
 TTACAGCTGTGGAGCACGGTATCCTCTGCCGAAACAGAGGTTGGACAAGACCGGAGGGGTCTCCTAGT  
 TCCAAAGGAGATGTACTCCGGGCTTGTTACGACCTACCGTGTAAGTCGTAGTCTAGTAGGCTACCTG  
 +  
 FFFFFFFFFFFFFFFFFFFFFFFFFF:FFFFFFFFFFFFFFFFFFFFFFFFFFFFFFFFFFFFFFFFFFFFFFFF  
 FFFFFFFFFFFFFFFFFFFFFFFFFFFFFFFFFFFFFFFFFFFFFFFFFFFFFFFFFFFFFFFFFFFFFFFFFF  
 @A00155:342:HHGFNDSXY:1:1674:7600:31219 1:N:0:GAACCTAG+TCCGCATA  
 CTCAATGCCGAGAGGGATGTGGAGGGCGAGAGAGAGCGACTTCTCTCGGGCCACAGCCTTACAGCTG  
 TGGAGCACGGTATCCTCTGCCGAAACAGAGGTTGGACAAGACCGGAGGGGTCTCCTAGTTCCAAAGGA  
 +  
 FFFFFFFFFFFFFFFFFF:FFFFFFFFFFFFFFFFFFFFFFFFFFFFFFFFFFFFFFFFFFFFFFFFFFFFF  
 FFFFFFFFFFFFFFFFFFFFFFFFFF:FFFFFFFFFFFFFFFFFFFFFFFFFFFFFFFFFFFFFFFFFFFFF  
 @A00155:342:HHGFNDSXY:1:1675:28863:17942 1:N:0:GAACCTAG+TCCGCATA  
 GGGCGAGAGAGAGCGACTTCTCTCGGGCCACAGCCTTACAGCTGTGGAGCACGGTATCCTCTGCCGA  
 AACAGAGGTTGGACAAGACCGGAGGGGTCTCCTAGTTCCAAAGGAGATGTACTCCGGGCTTGTTACG  
 +

FFFFFFFFFFFFFFFFFFFFFFFFFFFFFFFFFFFFFFFFFFFFFFFFFFFFFFFFFFFFFFFFFFFFFFFF  
FFFF:FFFFFFFF:FFFFFFFFFFFFFFFFFFFFFFFFFFFFFFFFFFFFFFFFFFFFFFFFFFFFFFFF:FFFF  
@A00155:342:HHGFNDSXY:1:1675:12608:29716 1:N:0:GAACCTAG+TCCGCATA  
AGGGCGAGAGAGAGCGACTTCTCTCGGGCCACAGCCTTACAGCTGTGGAGCACGGTATCCTCTGCCG  
AAACAGAGGTTGGACAAGACCGGAGGGGTCTCCTAGTTCCAAAGGAGATGTACTCCGGGCTTGTTTAC  
+  
FFFFFFFFFFFFFFFFFFFFFFFFFFFFFFFFFFFFFFFFFFFFFFFFFFFFFFFFFFFFFFFFFFFFFFFF  
FFFFFFFFFFFFFFFFFFFFFFFFFFFFFFFFFFFFFFFFFFFFFFFFFFFFFFFFFFFFFFFFFFFFFFFF  
@A00155:342:HHGFNDSXY:1:1675:3558:35274 1:N:0:GAACCTAG+TCCGCATA  
CTTCTCTCGGGCCACAGCCTTACAGCTGTGGAGCACGGTATCCTCTGCCGAAACAGAGGTTGGACAA  
GACCGGAGGGGTCTCCTAGTTCCAAAGGAGATGTACTCCGGGCTTGTTTACGACCTACCGTGTAAGTC  
+  
FFFFFFFFFFFFFFFFFFFFFFFFFFFFFFFFFFFFFFFFFFFFFFFFFFFFFFFFFFFFFFFFFFFFFFFF  
FFFFFFFFFFFFFFFFFFFFFFFFFFFFFFFFFFFFFFFFFFFFFFFFFFFFFFFFFFFFFFFFFFFFFFFF  
@A00155:342:HHGFNDSXY:1:1675:8865:36605 1:N:0:GAACCTAG+TCCGCATA  
CTATGGTCATCTCAATGCCGAGAGGGATGTGGAGGGCGAGAGAGAGCGACTTCTCTCGGGCCACAGC  
CTTACAGCTGTGGAGCACGGTATCCTCTGCCGAAACAGAGGTTGGACAAGACCGGAGGGGTCTCCTAG  
+  
FFFFFFFFFFFFFFFFFFFFFFFFFFFFFFFFFFFFFFFFFFFFFFFFFFFFFFFFFFFFFFFFFFFFFFFF  
FFFFFFFFFFFFFFFFFFFFFFFFFFFFFFFFFFFFFFFFFFFFFFFFFFFFFFFFFFFFFFFFFFFFFFFF  
@A00155:342:HHGFNDSXY:1:1676:26549:6386 1:N:0:GAACCTAG+TCCGCATA  
GAGAGGGATGTGGAGGGCGAGAGAGAGCGACTTCTCTCGGGCCACAGCCTTACAGCTGTGGAGCACG  
GTATCCTCTGCCGAAACAGAGGTTGGACAAGACCGGAGGGGTCTCCTGGTTCCAAAGGAGATGTACTC  
+  
FFFFFFFFFFFFFFFFFFFFFFFFFFFFFFFFFFFFFFFFFFFFFFFFFFFFFFFFFFFFFFFFFFFFFFFF  
FFFFFFFFFFFFFFFFFFFFFFFFFFFFFFFFFFFFFFFFFFFFFFFFFFFFFFFFFFFFFFFFFFFFFFFF:FFF  
@A00155:342:HHGFNDSXY:1:1676:7075:23484 1:N:0:GAACCTAG+TCCGCATA  
GATGTGGAGGGCGAGAGAGAGCGACTTCTCTCGGGCCACAGCCTTACAGCTGTGGAGCACGGTATCC  
TCTGCCGAAACAGAGGTTGGACAAGACCGGAGGGGTCTCCTAGTTCCAAAGGAGATGTAC  
+  
F::FFFFFFFFFFFFFFFFFFFFFFFFFFFFFFFFFFFFFFFFFFFFFFFFFFFFFFFFFFFFFFFFFFFF  
FFFFFFFF:FFFFFFFFFFFFFFFFFFFFFFFFFFFFFFFFFFFFFFFFFFFFFFFFFFFFFFFFFFFFFFFF  
@A00155:342:HHGFNDSXY:1:1676:27471:24706 1:N:0:GAACCTAG+TCCGCATA  
CTCGGGCCACAGCCTTACAGCTGTGGAGCACGGTATCCTCTGCCGAAACAGAGGTTGGACAAGACCG  
GAGGGGTCTCCTAGTTCCAAAGGAGATGTACTCCGGGCTTGTTTACGACCTACCGTGTAAGTCGTAGT  
+  
FFFFFFFFFFFFFFFFFFFFFFFFFFFFFFFFFFFFFFFFFFFFFFFFFFFFFFFFFFFFFFFFFFFFFFFF:FFFF  
FFFFFFFFFFFFFFFFFFFFFFFFFFFFFFFFFFFFFFFFFFFFFFFFFFFFFFFFFFFFFFFFFFFFFFFF:  
@A00155:342:HHGFNDSXY:1:1677:2781:4899 1:N:0:GAACCTAG+TCCGCATA  
CAGCCTTACAGCTGTGGAGCACGGTATCCTCTGCCGAAACAGAGGTTGGACAAGACCGGAGGGGTCTC  
CTAGTTCCAAAGGAGATGTACTCCGGGCTTGTTTACGACCTACCGTGTAAGTCGTAGTCTAGTAGGCT  
+  
FFFFFFFFFFFFFFFFFFFFFFFFFFFFFFFFFFFFFFFFFFFFFFFFFFFFFFFFFFFFFFFFFFFFFFFF  
FFFFFFFFFFFFFFFFFFFFFFFFFFFFFFFFFFFFFFFFFFFFFFFFFFFFFFFFFFFFFFFFFFFFFFFF  
@A00155:342:HHGFNDSXY:1:1677:27841:31798 1:N:0:GAACCTAG+TCCGCATA  
GAGCGACTTCTCTCGGGCCACAGCCTTACAGCTGTGGAGCACGGTATCCTCTGCCGAAACAGAGGTT  
GGACAAGACCGGAGGGGTCTCCTAGTTCCAAAGGAGATGTACTCCGGGCTTGTTTACGACCTACCGTG  
+  
FFFFFFFFFFFFFFFFFFFFFFFFFFFFFFFFFFFFFFFFFFFFFFFFFFFFFFFFFFFFFFFFFFFFFFFF  
FFFFFF:FFFFFFFFFFFFFFFFFFFFFFFFFFFFFFFFFFFFFFFFFFFFFFFFFFFFFFFFFFFFFFFF:F  
@A00155:342:HHGFNDSXY:1:1678:16206:13088 1:N:0:GAACCTAG+TCCGCATA  
GGATGTGGAGGGCGAGAGAGAGCGACTTCTCTCGGGCCACAGCCTTACAGCTGTGGAGCACGGTATC  
CTCTGCCGAAACAGAGGTTGGACAAGACCGGAGGGGTCTCCTGGTTCCAAAGGAGATGTACTCC  
+

FFFFFFFFFFFFFFFFFFFFFFFFFFFFFFFFFFFFFFFFFFFFFFFFFFFFFFFFFFFFFFFFFFFFFFFF  
FFFFFFFFFFFFFFFFFFFFFFFFFFFFFFFFFFFFFFFFFFFFFFFFFFFFFFFFFFFFFFFFFFFFFFFF  
@A00155:342:HHGFNDSXY:1:1678:25464:14904 1:N:0:GAACCTAG+TCCGCATA  
ACTTCTCTCGGGCCACAGCCTTACAGCTGTGGAGCACGGTATCCTCTGCCGAAACAGAGGTTGGACA  
AGACCGGAGGGGTCTCCTAGTTCCAAAGGAGATGTACTCCGGGCTTGTTACGACCTACC  
+  
FFFFFFFFFFFFFFFFFFFFFFFFFFFFFFFFFFFFFFFFFFFFFFFFFFFFFFFFFFFFFFFFFFFFFFFF  
FFFFFFFFFFFFFFFFFFFFFFFFFFFFFFFFFFFFFFFFFFFFFFFFFFFFFFFFFFFFFFFFFFFFFFFF  
@A00155:342:HHGFNDSXY:1:1678:16604:19758 1:N:0:GAACCTAG+TCCGCATA  
TAGAGGGCGAGAGAGAGCGACTTCTCTCGGGCCACAGCCTTACAGCTGTGGAGCACGGTATCCTCTG  
CCGAAACAGAGGTTGGACAAGACCGGAGGGGTCTCCTAGTTCCAAAGGAGATGTACTCCGGGCTTGTT  
+  
FFFFFFFFFFFFFFFFFFFFFFFFFFFFFFFFFFFFFFFFFFFFFFFFFFFFFFFFFFFFFFFFFFFFFFFF  
FFFFFFFFFFFFFFFFFFFFFFFFFFFFFFFFFFFFFFFFFFFFFFFFFFFFFFFFFFFFFFFFFFFFFFFF  
@A00155:342:HHGFNDSXY:1:1678:27281:24565 1:N:0:GAACCTAG+TCCGCATA  
CAATGCCGAGAGGGATGTGGAGGGCGAGAGAGAGCGACTTCTCTCGGGCCACAGCCTTACAGCTGTG  
GAGCACGGTATCCTCTGCCGAAACAGAGGTTGGACAAGACCGGAGGGGTCTCCTAGTTCCAAAGGAGA  
+  
FFFFFFFFFFFFFFFFFFFFFFFFFFFFFFFFFFFFFFFFFFFFFFFFFFFFFFFFFFFFFFFFFFFFFFFF  
FFFFFFFFFFFFFFFFFFFFFFFFFFFFFFFFFFFFFFFFFFFFFFFFFFFFFFFFFFFFFFFFFFFFFFFF  
@A00155:342:HHGFNDSXY:1:2101:28465:29152 1:N:0:GAACCTAG+TCCGCATA  
ATCTCAATGCCGAGAGGGATGTGGAGGGCGAGAGAGAGCGACTTCTCTCGGGCCACAGCCTTACAGC  
TGTGGAGCACGGTATCCTCTGCCGAAACAGAGGTTGGACAAGACCGGAGGGGTCTCCAAGTTCCAAAG  
+  
FFFFFFFFFFFFFFFFFFFFFFFFFFFFFFFFFFFFFFFFFFFFFFFFFFFFFFFFFFFFFFFFFFFFFFFF  
FFFFFFFFFFFFFFFFFFFFFFFFFFFFFFFFFFFFFFFFFFFFFFFFFFFFFFFFFFFFFFFFFFFFFFFF  
@A00155:342:HHGFNDSXY:1:2101:7256:29684 1:N:0:GAACCTAG+TCCGCATA  
CCCACAGCCTTACAGCTGTGGAGCACGGTATCCTCTGCCGAAACAGAGGTTGGACAAGACCGGAGGGG  
TCTCCTAGTTCCAAAGGAGATGTACTCCGGGCTTGTTACGACCTACCGTGTAAGTCGTAGTCTAGTA  
+  
FF:FFFFFFFF:FFFFF,FFFFFFFFFFFFFFFF:FFFFFFFF:FFFFFFFFFFFFFFFF, :FF  
FFFFFFFF: :FFFFFFFF:FFFFF:FFFFFFFFFFFFFFFFFFFFFFFFFFFFFFFFFFFFFFFF  
@A00155:342:HHGFNDSXY:1:2101:32172:36448 1:N:0:GAACCTAG+TCCGCATA  
GAAACCGTCGTTACTCTTCGAGTTGTGTAAGTTTCGTCCTAAAAAGGACTCGTCAGGTAGCCTACTAG  
ACTACGACTTACACGGTAGTCTGTAACAAGCCCGGAGTACATCTCCTTTGGAAGTGGAGACCCCTC  
+  
FFFFFFFFFFFFFFFF:FFFFFFFFFFFFFFFF:FFFFFFFFFFFFFFFF:FFFFFF:FFFFFF,  
FFFFFFFF:FFFFFFFFFFFFFFFF:FF,FFFFFFFF, ,F:FFFFFFFF:FFFFFF:FFF:F  
@A00155:342:HHGFNDSXY:1:2102:29658:4789 1:N:0:GAACCTAG+TCCGCATA  
ATCTCAATGCCGAGAGGGATGTGGAGGGCGAGAGAGAGCGACTTCTCTCGGGCCACAGCCTTACAGC  
TGTGGAGCACGGTATCCTCTGCCGAAACAGAGGTTGGACAAGACCGGAGGGGTCTCCAAGTTCCAAAG  
+  
FFFFFFFFFFFFFFFFFFFFFFFFFFFFFFFFFFFFFFFFFFFFFFFFFFFFFFFFFFFFFFFFFFFFFFFF  
FFFFFFFFFFFFFFFFFFFFFFFFFFFFFFFFFFFFFFFFFFFFFFFFFFFFFFFFFFFFFFFFFFFFFFFF  
@A00155:342:HHGFNDSXY:1:2102:4616:8609 1:N:0:GAACCTAG+TCCGCATA  
TGCCCCGCCACACCGCCTTAGATCAGCTGTGTCCACTTAAGGACTCACCTCTGGCCTATGGTCATCTC  
AATGCCGAGAGGGATGTGGAGGGCGAGAGAGAGCGACTTCTCTCGGGCCACAGCCTTACAGCTGTGG  
+  
FFFFFFFFFFFFFFFF,FFFFFFFFFFFFFFFFFFFFFFFFFFFFFFFFFFFFFFFFFFFFFFFF  
FFFFFFFFFFFFFFFFFFFFFFFF:FFFFFFFFFFFFFFFFFFFFFFFFFFFFFFFF:FFFFFFFF  
@A00155:342:HHGFNDSXY:1:2102:13467:10535 1:N:0:GAACCTAG+TCCGCATA  
GCTGTGTCCACTTAAGGACTCACCTCTGGCCTATGGTCATCTCAATGCCGAGAGGGATGTGGAGGGCG  
AGAGAGAGCGACTTCTCTCGGGCCACAGCCTTACAGCTGTGGTGCACGGTATCCTCTGCCGAAACAG  
+



FFFFFFFFFFFFFFFFFFFFFFFFFFFFFFFFFFFFFFFFFFFFFFFFFFFFFFFFFFFFFFFFFFFFFFFFFFFF  
FFFFFF:FFFF:FFFFFFFFFFFFFFFFFFFFFF,FFFFFF,FFFFFFFFFFFFFFFFFFFFFFFFFFFFF  
@A00155:342:HHGFNDSXY:1:2102:4300:11005 1:N:0:GAACCTAG+TCCGCATA  
TGCCCCGCCACACCGCCTTAGATCAGCTGTGTCCACTTAAGGACTCACCTCTGGCCTATGGTCATCTC  
AATGCCGAGAGGGATGTGGAGGGCGAGAGAGAGCGACTTCTCTCGGGCCACAGCCTTACAGCTGTGG  
+  
FFFFFFFF:FFFFFFFF:F:FF:FFFFFFFFFFFFFFFF:FFFFFFFFFFFFFFFFFFFFFFFFFFFFFFFF  
FFFFFF:FFF:FFFFFFFFFFFFFFFFFFFFFF:FFFFFFFFFFFFFFFFFFFFFFFFFFFFFFFFFFFFF  
@A00155:342:HHGFNDSXY:1:2102:13087:23218 1:N:0:GAACCTAG+TCCGCATA  
GTGTCCACTTAAGGACTCACCTCTGGCCTATGGTCATCTCTATGCCGAGAGGGATGTGGAGGGCGAGA  
GAGAGCGACTTCTCTCGGGCCACAGCCTTACAGCTGTGGAGCACGGTATCCTCTGCCGAAACAGAGG  
+  
FFFFFFFFFFFFFFFFFFFFFFFFFFFFFFFFFFFFFFFFFFFFFFFFFFFFFFFFFFFFFFFFFFFFFFFF  
FFF:FFFFFFFFFFFFFFFFFFFFFFFFFFFFFFFFFFFFFFFFFFFFFFFFFFFFFFFFFFFFFFFFFFFF  
@A00155:342:HHGFNDSXY:1:2102:13096:23328 1:N:0:GAACCTAG+TCCGCATA  
GTGTCCACTTAAGGACTCACCTCTGGCCTATGGTCATCTCTATGCCGAGAGGGATGTGGAGGGCGAGA  
GAGAGCGACTTCTCTCGGGCCACAGCCTTACAGCTGTGGAGCACGGTATCCTCTGCCGAAACAGAGG  
+  
FFFFFFFFFFFFFFFFFFFFFFFFFFFFFFFFFFFFFFFFFFFFFFFFFFFFFFFFFFFFFFFFFFFFFFFF  
FFFFFFFFFFFFFFFFFFFFFFFFFFFFFFFF:FFFFFFFFFFFF:FFFFFFFFFFFFFFFFFFFFFFFF  
@A00155:342:HHGFNDSXY:1:2102:11026:33708 1:N:0:GAACCTAG+TCCGCATA  
TGCCGAGAGGGATGTAGAGGGCGAGAGAGAGCGACTTCTCTCGGGCCACAGCCTTACAGCTGTGGAG  
CACGGTATCCTCTGCCGAAACAGAGGTTGGACAAGACCGGAGGGGTCTCCTAGTTCCAAAGGAGATGT  
+  
FFFFFFFFFFFFFFFFFFFFFFFFFFFFFFFFFFFFFFFFFFFFFFFFFFFFFFFFFFFFFFFFFFFFFFFF  
FFFFFFFFFFFFFFFFFFFFFFFFFFFFFFFFFFFFFFFFFFFFFFFFFFFFFFFFFFFFFFFFFFFFFFFF  
@A00155:342:HHGFNDSXY:1:2103:28357:10457 1:N:0:GAACCTAG+TCCGCATA  
ACTTCTCTCGGGCCACAGCCTTACAGCTGTGGAGCACGGTATCCTCTGCCGAAACAGAGGTTGGACA  
AGACCGGAGGGGTCTCCTGGTTCCAAAGGAGATGTACTCCGGGCTTGTTACGACCTACCGTGTAAGT  
+  
FFFFFFFFFFFFFFFFFFFFFFFFFFFFFFFFFFFFFFFFFFFFFFFFFFFFFFFFFFFFFFFFFFFFFFFF  
FFFFFFFFFFFFFFFFFFFFFFFFFFFFFFFFFFFFFFFFFFFFFFFFFFFFFFFFFFFFFFFFFFFFFFFF  
@A00155:342:HHGFNDSXY:1:2103:9525:14606 1:N:0:GAACCTAG+TCCGCATA  
GAGAGGGATGTGGAGGGCGAGAGAGAGCGACTTCTCTCGGGCCACAGCCTTACAGCTGTGGAGCACG  
GTATCCTCTGCCGAAACAGAGGTTGGACAAGACCGGAGGGGTCTCCTAGTTCCAAAGGAGATGTACTC  
+  
FFFFFFFFFFFFFFFFFFFFFFFFFFFFFFFFFFFFFFFFFFFFFFFFFFFFFFFFFFFFFFFFFFFFFFFF  
FFFFFFFFFFFFFFFFFFFFFFFFFFFFFFFFFFFFFFFFFFFFFFFFFFFFFFFFFFFFFFFFFFFFFFFF  
@A00155:342:HHGFNDSXY:1:2103:22498:19977 1:N:0:GAACCTAG+TCCGCATA  
CACCTCTGGCCTATGGTCATCTCAATGCCGAGAGGGATGTGGAGGGCGAGAGAGAGCGACTTCTCTCG  
GGCCACAGCCTTACAGCTGTGGAGCACGGTATCCTCTGCCGAAACAGAGGTTGGACAAGACCGGAGG  
+  
FFFFFFFFFFFFFF:FFFFFFFFFFFFFFFFFFFFFFFFFFFFFFFFFFFFFFFFFFFFFFFFFFFFFFFF  
FFFFFFFFFFFFFFFFFFFFFFFFFFFFFFFFFFFFFFFFFFFFFFFFFFFFFFFFFFFFFFFFFFFFFF:FFFFFF  
@A00155:342:HHGFNDSXY:1:2103:22263:24361 1:N:0:GAACCTAG+TCCGCATA  
CAATGCCGAGAGGGATGTAGAGGGCGAGAGAGAGCGACTTCTCTCGGGCCACAGCCTTACAGCTGTG  
GAGCACGGTATCCTCTGCCGAAACAGAGGTTGGACAAGACCGGAGGGGTCTCCTAGTTCCAAAGGAGA  
+  
FFFFFFFFFFFFFFFFFFFFFFFF:FFFFFFFFFFFF:FFFFFFFFFFFFFFFFFFFFFFFFFFFFF::FFFFFF  
FFFFFF:FFFFFFFFFFFFFFFFFFFFFFFFFFFF,FFFFFF:FFFFFFFFFFFF,FFFFFFFFFFFFF  
@A00155:342:HHGFNDSXY:1:2103:27389:28166 1:N:0:GAACCTAG+TCCGCATA  
TCCTCTGCCGAAACAGAGGTTGGACAAGACCGGAGGGGTCTCCTAGTTCCAAAGGAGATGTACTCCGG  
GCTTGTTACGACCTACCGTGTAAGTCGTAGTCTAGTAGGCTACCTGACGAGTCCTTTTAGGACGAA  
+

FFFFFFFFFFFFFFFFFFFFFFFFFFFFFFFFFFFFFFFFFFFFFFFFFFFFFFFFFFFFFFFFFFFFFFFF  
FFFFFFFFFFFFFFFFFFFFFFFFFFFFFFFFFFFFFFFFFFFFFFFFFFFFFFFFFFFFFFFFFFFFFFFF  
@A00155:342:HHGFNDSXY:1:2104:17390:6214 1:N:0:GAACCTAG+TCCGCATA  
TGTAGAGGGCGAGAGAGAGCGACTTCTCTCGGGCCACAGCCTTACAGCTGTGGAGCACGGTATCCTC  
TGCCGAAACAGAGGTTGGACAAGACCGGAGGGGTCTCCTAGTTCCAAAGGAGATGTACTCCGGG  
+  
FFFFFFFFFFFFFFFFFFFFFFFFFFFFFFFFFFFFFFFFFFFFFFFFFFFFFFFFFFFFFFFFFFFFFFFF  
FFFFFFFFFFFFFFFFFFFFFFFFFFFFFFFFFFFFFFFFFFFFFFFFFFFFFFFFFFFFFFFFFFFFFFFF  
@A00155:342:HHGFNDSXY:1:2104:25183:11851 1:N:0:GAACCTAG+TCCGCATA  
AGCGACTTCTCTCGGGCCACAGCCTTACAGCTGTGGAGCACGGTATCCTCTGCCGAAACAGAGGTTG  
GACAAGACCGGAGGGGTCTCCTAGTTCCAAAGGAGATGTACTCCGGGCTTGTTACGACCTACCGTGT  
+  
FFFFFFFFFFFFFFFFFFFFFFFFFFFFFFFFFFFFFFFFFFFFFFFFFFFFFFFFFFFFFFFFFFFFFFFF  
FFFFFFFFFFFFFFFFFFFFFFFFFFFFFFFFFFFFFFFFFFFFFFFFFFFFFFFFFFFFFFFFFFFFFFFF  
@A00155:342:HHGFNDSXY:1:2104:8133:17080 1:N:0:GAACCTAG+TCCGCATA  
AGGGCGAGAGAGAGCGACTTCTCTCGGGCCACAGCCTTACAGCTGTGGAGCACGGTATCCTCTGCCG  
AAACAGAGGTTGGACAAGACCGGAGGGGTCTCCTAGTTCCAAAGGAGATGTACTCCGAGCTTGTTAC  
+  
FFFFFFFFFFFFFFFFFFFFFFFFFFFFFFFFFFFFFFFFFFFFFFFFFFFFFFFFFFFFFFFFFFFFFFFF  
FFFFFFFFFFFFFFFFFFFFFFFFFFFFFFFFFFFFFFFFFFFFFFFFFFFFFFFFFFFFFFFFFFFFFFFF  
@A00155:342:HHGFNDSXY:1:2104:31060:24158 1:N:0:GAACCTAG+TCCGCATA  
CTTCTCTCGGGCCACAGCCTTACAGCTGTGGAGCACGGTATCCTCTGCCGAAACAGAGGTTGGACAA  
GACCGGAGGGGTCTCCTAGTTCCAAAGGAGATGTACTCCGGGCTTGTTACGACCTACCGTGTAAGTC  
+  
FFFFFFFFFFFFFFFFFFFFFFFFFFFFFFFFFFFFFFFFFFFFFFFFFFFFFFFFFFFFFFFFFFFFFFFF  
FFFFFFFFFFFFFFFFFFFFFFFFFFFFFFFFFFFFFFFFFFFFFFFFFFFFFFFFFFFFFFFFFFFFFFFF  
@A00155:342:HHGFNDSXY:1:2104:8630:25269 1:N:0:GAACCTAG+TCCGCATA  
TGTTTTCGGCAGAGGATACCGTGCTCCACAGCTGTAAGGCTGTGGGCCCGAGAGAAGTCGCTCTCTC  
GCCCTTACATCCCTCTCGGCATTGAGATGACCATAGGCCAGAGGTGAGTCCTTAAGTGGACACAGCT  
+  
FFFFFFFFFFFFFFFFFFFFFFFFFFFFFFFFFFFFFFFFFFFFFFFFFFFFFFFFFFFFFFFFFFFFFFFF  
FFFFFFFFFFFFFFFFFFFFFFFFFFFFFFFFFFFFFFFFFFFFFFFFFFFFFFFFFFFFFFFFFFFFFFFF  
@A00155:342:HHGFNDSXY:1:2104:18945:26381 1:N:0:GAACCTAG+TCCGCATA  
ACCTCTGTTTTCGGCAGAGGATACCGTGCTCCACAGCTGTAAGGCTGTGGGCCCGAGAGAAGTCGCTCT  
CTCTCGCCCTCCACATCCCTCTCGGCATTGAGATGACCATAGGCCAGAGGAGAGTCCTTAAGTGGACA  
+  
FFFFFFFFFFFFFFFFFFFFFFFFFFFFFFFFFFFFFFFFFFFFFFFFFFFFFFFFFFFFFFFFFFFFFFFF  
FFFFFFFFFFFFFFFFFFFFFFFFFFFFFFFFFFFFFFFFFFFFFFFFFFFFFFFFFFFFFFFFFFFFFFFF  
@A00155:342:HHGFNDSXY:1:2104:21169:30577 1:N:0:GAACCTAG+TCCGCATA  
ACCTCTGTTTTCGGCAGAGGATACCGTGCTCCACAGCTGTAAGGCTGTGGGCCCGAGAGAAGTCGCTCT  
CTCTCGCCCTCCACATCCCTCTCGGCATTGAGATGACCATAGGCCAGAGGAGAGTCCTTAAGTGGACA  
+  
FFFFFFFFFFFFFFFFFFFFFFFFFFFFFFFFFFFFFFFFFFFFFFFFFFFFFFFFFFFFFFFFFFFFFFFF  
FFFFFFFFFFFFFFFFFFFFFFFFFFFFFFFFFFFFFFFFFFFFFFFFFFFFFFFFFFFFFFFFFFFFFFFF  
@A00155:342:HHGFNDSXY:1:2104:6840:30812 1:N:0:GAACCTAG+TCCGCATA  
CAGCCTTACAGCTGTGGAGCACGGTATCCTCTGCCGAAACAGAGGTTGGACAAGACCGGAGGGGTCTC  
CTAGTTCCAAAGGAGATGTACTCCGGGCTTGTTACGACCTACCGTGTAAGTCGTAGTCTAGTAGGCT  
+  
FFFFFFF:FFFFFFFFFFFFFFFFFFFFFFFFFFFFFFFFFFFFFFFFFFFFFFFFFFFFFFFFFFFFFFFF  
FFFFFFFFFFFFFFFFFFFFFFFFFFFFFFFFFFFFFFFFFFFFFFFFFFFFFFFFFFFFFFFFFFFFFFFF  
@A00155:342:HHGFNDSXY:1:2104:26142:31203 1:N:0:GAACCTAG+TCCGCATA  
TGCCGAGAGGGATGTAGAGGGCGAGAGAGAGCGACTTCTCTCGGGCCACAGCCTTACAGCTGTGGAG  
CACGGTATCCTCTGCCGAAACAGAGGTTGGACAAGACCGGAGGGGTCTCCTAGTTCCAAAGGAGATGT  
+

FFFFFFFFFFFFFFFFFFFFFFFFFFFFFFFFFFFFFFFFFFFFFFFFFFFFFFFFFFFFFFFFFFFFFFFF  
FFFFFFFFFFFFFFFFFFFFFFFFFFFFFFFFFFFFFFFFFFFFFFFFFFFFFFFFFFFFFFFFFFFFFFFF:FFFFFF  
@A00155:342:HHGFNDSXY:1:2104:7780:32628 1:N:0:GAACCTAG+TCCGCATA  
ATCCTCTGCCGAAACAGAGGTTGGACAAGACCGGAGGGGTCTCCTAGTTCCAAAGGAGATGTACTCCG  
GGCTTGTTACGACCTACCGTGTAAGTCGTAGTCTAGTAGGCTACCTGACGAGTCCTTTTATAGGACGA  
+  
FFFFFFFFFFFFFFFFFFFFFFFFFFFFFFFFFFFFFFFFFFFFFFFFFFFFFFFFFFFFFFFFFFFFFFFF  
FFFFFFFFFFFFFFFFFFFFFFFFFFFFFFFFFFFFFFFFFFFFFFFFFFFFFFFFFFFFFFFFFFFFFFFF:FFFFFF  
@A00155:342:HHGFNDSXY:1:2105:4743:1908 1:N:0:GAACCTAG+TCCGCATA  
GACTTCTCTCGGGCCACAGCCTTACAGCTGTGGAGCACGGTATCCTCTGCCGAAACAGAGGTTGGAC  
AAGACCGGAGGGGTCTCCTAGTTCCAAAGGAGATGTACTCCGGGCTTGTTACGACCTACCGTGTAAG  
+  
FFFFFFFFFFFF:FFFF:FFFFFFFFFFFFFFFFFFFFFFFFFFFFFFFFFFFFFFFFFFFFFFFFFFFF:FFFF:FFFFFFFF  
FFFFFFFFFFFF:FFFFF:FFFFFFFFF:FFF:FFFF:FFFFFFFFFFFFFFFFFFFFFFFFFFFF,FFF,F  
@A00155:342:HHGFNDSXY:1:2105:25798:4272 1:N:0:GAACCTAG+TCCGCATA  
AGGGATGTGGAGGGCGAGAGAGAGCGACTTCTCTCGGGCCACAGCCTTACAGCTGTGGAGCACGGTA  
TCCTCTGCCGAAACAGAGGTTGGACAAGACCGGAGGGGTCTCCTAGTTCCAAAGGAGATGTACTCCGG  
+  
FFFFFFFFFFFFFFFFFFFFFFFFFFFFFFFFFFFFFFFFFFFFFFFFFFFFFFFFFFFFFFFFFFFFFFFF  
FFFFFFFFFFFFFFFFFFFFFFFFFFFFFFFFFFFFFFFFFFFFFFFFFFFFFFFFFFFFFFFFFFFFFFFF  
@A00155:342:HHGFNDSXY:1:2106:22634:1423 1:N:0:GAACCTAG+TCCGCATA  
CTTCTCTCGGGCCACAGCCTTACAGCTGTGGAGCACGGTATCCTCTGCCGAAACAGAGGTTGGACAA  
GACCGGAGGGGTCTCCTAGTTCCAAAGGAGATGTACTCCGGGCTTGTTACGACCTACCGTGTAAGT  
+  
FFFFFFFFFFFFFFFFFFFFFFFFFFFFFFFFFFFFFFFFFFFFFFFFFFFFFFFFFFFFFFFFFFFFFFFF:FFFFFFFF  
FFFFFFFFFFFFFFFFFFFFFFFFFFFFFFFFFFFFFFFFFFFFFFFFFFFFFFFFFFFFFFFFFFFFFFFF:FFFFFFFF  
@A00155:342:HHGFNDSXY:1:2106:9959:5650 1:N:0:GAACCTAG+TCCGCATA  
GGACTCACCTCTGGCCTATGGTCATCTCAATGCCGAGAGGGATGTAGAGGGCGAGAGAGAGCGACTTC  
TCTCGGGCCACAGCCTTACAGCTGTGGAGCACGGTATCCTCTGCCGAAACAGAGGTTGGACAAGACC  
+  
FFFFFFFFFFFFFFFFFFFFFFFFFFFFFFFFFFFFFFFFFFFFFFFFFFFFFFFFFFFFFFFFFFFFFFFF  
FFFFFFFFFFFFFFFFFFFFFFFFFFFFFFFFFFFFFFFFFFFFFFFFFFFFFFFFFFFFFFFFFFFFFFFF  
@A00155:342:HHGFNDSXY:1:2106:22435:15013 1:N:0:GAACCTAG+TCCGCATA  
GGATGTGGAGGGCGAGAGAGAGCGACTTCTCTCGGGCCACAGCCTTACAGCTGTGGAGCACGGTATC  
CTCTGCCGAAACAGAGGTTGGACAAGACCGGAGGGGTCTCCTAGTTCCAAAGGAGATGTACTCC  
+  
FFFFFFFFFFFFFFFFFFFFFFFFFFFFFFFFFFFFFFFFFFFFFFFFFFFFFFFFFFFFFFFFFFFFFFFF  
FFFFFFFFFFFFFFFFFFFFFFFFFFFFFFFFFFFFFFFFFFFFFFFFFFFFFFFFFFFFFFFFFFFFFFFF:FF  
@A00155:342:HHGFNDSXY:1:2107:25509:9878 1:N:0:GAACCTAG+TCCGCATA  
TGCCGAGAGGGATGTGGAGGGCGAGAGAGAGCGACTTCTCTCGGGCCACAGCCTTACAGCTGTGGAG  
CACGGTATCCTCTGCCGAAACAGAGGTTGGACAAGACCGGAGGGGTCTCCTAGTTCCAAAGGAGATGT  
+  
FFFFFFFFFFFFFFFFFFFFFFFFFFFFFFFFFFFFFFFFFFFFFFFFFFFFFFFFFFFFFFFFFFFFFFFF  
FFFFFFFFFFFFFFFFFFFFFFFFFFFFFFFFFFFFFFFFFFFFFFFFFFFFFFFFFFFFFFFFFFFFFFFF  
@A00155:342:HHGFNDSXY:1:2107:10592:35712 1:N:0:GAACCTAG+TCCGCATA  
ACTTCTCTCGGGCCACAGCCTTACAGCTGTGGAGCACGGTATCCTCTGCCGAAACAGAGGTTGGACA  
AGACCGGAGGGGTCTCCTAGTTCCAAAGGAGATGTACTCCGGGCTTGTTACGACCTACCGTGTAAGT  
+  
FFFFFFFFFFFFFFFFFFFFFFFFFFFFFFFFFFFFFFFFFFFFFFFFFFFFFFFFFFFFFFFFFFFFFFFF  
FFFFFFFFFFFFFFFFFFFFFFFFFFFFFFFFFFFFFFFFFFFFFFFFFFFFFFFFFFFFFFFFFFFFFFFF,F:  
@A00155:342:HHGFNDSXY:1:2107:2085:36198 1:N:0:GAACCTAG+TCCGCATA  
TGTGGCGGGCATGGGTTTGAACCCCATGACGGTCGGAGTCTAGTAGGCTCCCTGATGAGTCCGTTC  
CAAGGACGAAACCGTCGTTACTCTTTGAGTTGTGTAAGTTTCGTCCTAAAAAGGACTCGTCAGG  
+

[illegible]

FFFFFFFFFFFFFFFFFFFFFFFFFFFFFFFFFFFFFFFFFFFFFFFFFFFFFFFFFFFFFFFFFFFFFFFF  
FFFFFFFFFFFFFFFFFFFFFFFFFFFFFFFFFFFFFFFFFFFFFFFFFFFFFFFFFFFFFFFFFFFFFFFF  
@A00155:342:HHGFNDSXY:1:2112:14597:3380 1:N:0:GAACCTAG+TCCGCATA  
AAGGACTCACCTCTGGCCTATGGTCATCTCAATGCCGAGAGGGATGTGAAGGGCGAGAGAGAGCGACT  
TCTCTCGGGCCACAGCCTTACAGCTGTGGAGCACGGTATCCTCTGCCGAAACAGAGGTTGGACAAGA  
+  
FFFFFFFFFFFFFFFFFFFFFFFFFFFFFFFFFFFFFFFFFFFFFFFFFFFFFFFFFFFFFFFFFFFFFFFF  
FFFFFFFFFFFFFFFFFFFFFFFFFFFFFFFFFFFFFFFFFFFFFFFFFFFFFFFFFFFFFFFFFFFFFFFF  
@A00155:342:HHGFNDSXY:1:2112:3188:26146 1:N:0:GAACCTAG+TCCGCATA  
ACTTCTCTCGGGCCACAGCCTTACAGCTGTGGAGCACGGTATCCTCTGCCGAAACAGAGGTTGGACA  
AGACCGGAGGGGTCTCCTAGTTCCAAAGGAGATGTACTCCGGGCTTGTTACGACCTACCGTGTAAGT  
+  
FFFFFFFFFFFFFFFFFFFFFFFFFFFFFFFFFFFFFFFFFFFFFFFFFFFFFFFFFFFFFFFFFFFFFFFF  
F:FFFFFFFFFFFFFFFFFFFFFFFFFFFFFFFFFFFFFFFFFFFFFFFFFFFFFFFFFFFFFFFF:FFFF:FFF  
@A00155:342:HHGFNDSXY:1:2112:13566:31939 1:N:0:GAACCTAG+TCCGCATA  
GGATGTAGAGGGCGAGAGAGAGCGACTTCTCTCGGGCCACAGCCTTACAGCTGTGGAGCACGGTATC  
CTCTGCCGAAACAGAGGTTGGACAAGACCGGAGGGGTCTCCTAGTTCCAAAGGAGATGTACTCC  
+  
FFFFFFFFFFFFFFFFFFFFFFFFFFFFFFFFFFFFFFFFFFFFFFFFFFFFFFFFFFFFFFFFFFFFFFFF  
FFFFFFFFFFFFFFFFFFFFFFFFFFFFFFFFFFFFFFFFFFFFFFFFFFFFFFFFFFFFFFFFFFFFFFFF  
@A00155:342:HHGFNDSXY:1:2112:3378:33144 1:N:0:GAACCTAG+TCCGCATA  
AAAGACTCACCTCTGGCCTATGGTCATCTCAATGCCGAGAGGGATGTGGAGGGCGAGAGAGAGCGACT  
TCTCTCGGGCCACAGCCTTACAGCTGTGGAGCACGGTATCCTCTGCCGAAACAGAGGTTGGACAAGA  
+  
FFFFFFFFFFFFFFFFFFFFFFFFFFFFFFFFFFFFFFFFFFFFFFFFFFFFFFFFFFFFFFFFFFFFFFFF:  
FFFFFFFFFFFFFFFFFFFFFFFFFFFFFFFFFFFFFFFFFFFFFFFFFFFFFFFFFFFFFFFFFFFFFFFF:  
@A00155:342:HHGFNDSXY:1:2112:10022:35603 1:N:0:GAACCTAG+TCCGCATA  
GAGCGACTTCTCTCGGGCCACAGCCTTACAGCTGTGGAGCACGGTATCCTCTGCCGAAACAGAGGTT  
GGACAAGACCGGAGGGGTCTCCTAGTTCCAAAGGAGATGTACTCCGGGCTTGTTACGACCTACCGTG  
+  
FFFFFFFFFFFFFFFFFFFFFFFFFFFFFFFFFFFFFFFFFFFFFFFFFFFFFFFFFFFFFFFFFFFFFFFF  
FFFFFFFFFFFFFFFFFFFFFFFFFFFFFFFFFFFFFFFFFFFFFFFFFFFFFFFFFFFFFFFFFFFFFFFF:  
@A00155:342:HHGFNDSXY:1:2113:29306:6277 1:N:0:GAACCTAG+TCCGCATA  
GGATGTGGAGGGCGAGAGAGAGCGACTTCTCTCGGGCCACAGCCTTACAGCTGTGGAGCACGGTATC  
CTCTGCCGAAACAGAGGTTGGACAAGACCGGAGGGGTCTCCTAGTTCCAAAGGAGATGTACTCC  
+  
FFF,FFFFFFFFFFFFFFFFFFFFFFFFFFFFFFFFFFFFFFFFFFFFFFFFFFFFFFFFFFFFFFFFFFFF  
FFFFFFFFFFFFFFFFFFFFFFFFFFFFFFFFFFFFFFFFFFFFFFFFFFFFFFFFFFFFFFFFFFFFFFFF  
@A00155:342:HHGFNDSXY:1:2113:13223:7513 1:N:0:GAACCTAG+TCCGCATA  
ACTTCTCTCGGGCCACAGCCTTACAGCTGTGGAGCACGGTATCCTCTGCCGAAACAGAGGTTGGACA  
AGACCGGAGGGGTCTCCTAGTTCCAAAGGAGATGTACTCCGGGCTTGTTACGACCTACCGTGTAAGT  
+  
FFFFFFFFFFFFFFFFFFFFFFFFFFFFFFFFFFFFFFFFFFFFFFFFFFFFFFFFFFFFFFFFFFFFFFFF  
FFFFFFFFFFFFFFFFFFFFFFFFFFFFFFFFFFFFFFFFFFFFFFFFFFFFFFFFFFFFFFFFFFFFFFFF  
@A00155:342:HHGFNDSXY:1:2113:23574:13479 1:N:0:GAACCTAG+TCCGCATA  
GAGAGCGACTTCTCTCGGGCCACAGCCTTACAGCTGTGGAGCACGGTATCCTCTGCCGAAACAGAGG  
TTGGACAAGACCGGAGGGGTCTCCTAGTTCCAAAGGAGATGTACTCCGGGCTTGTTACGACCTACCG  
+  
FFFFFFFFFFFFFFFFFFFFFFFFFFFFFFFFFFFFFFFFFFFFFFFFFFFFFFFFFFFFFFFFFFFFFFFF  
FFFFFFFFFFFFF:FFFFFFFFFFFFFFFFFFFFFFFFFFFFFFFFFFFFFFFFFFFFFFFFFFFFFFFFF:F  
@A00155:342:HHGFNDSXY:1:2113:20844:23062 1:N:0:GAACCTAG+TCCGCATA  
CTCAATGCCGAGAGGGATGTGGAGGGCGAGAGAGAGCGACTTCTCTCGGGCCACAGCCTTACAGCTG  
TGGTGACGGTATCCTCTGCCGAAACAGAGGTTGGACAAGACCGGAGGGGTCTCCTAGTTCCAAAGGA  
+

FFFFFFFFF:FFFFFFFFFFFFFFFFFFFFFFFFFFFFFFFFFFFFFFFFFFFFFFFFFFFFFFFFFFFFFFFFF:FFF  
FFFFFFFFFFFFFFFFFFFFFFFFFFFFFFFFFFFFFFFFFFFFFFFFFFFFFFFFFFFFFFFFFFFFFFFFF  
@A00155:342:HHGFNDSXY:1:2113:8883:31501 1:N:0:GAACCTAG+TCCGCATA  
TCCACTTAAGGACTCTCCTCTGGCCTATGGTCATCTCAATGCCGAGAGGGATGTGGAGGGCGAGAGAG  
AGCGACTTCTCTCGGGCCACAGCCTTACAGCTGTGGAGCACGGTATCCTCTGCCGAAACAGAGGTTG  
+  
FFF:FF,FF:FFFF,FFFFFFFF,FF,FFFFFFFFFFFFFFFFFFFFFFFF:FFF:F,FFF:FFFFFFFFF  
FFFFFFFF:FFFFFFFF:FFFFFF,FF,FFFF:FF:FF:FFFF:FFF:FFFFFFFF:FFF:FFF  
@A00155:342:HHGFNDSXY:1:2113:10050:32111 1:N:0:GAACCTAG+TCCGCATA  
TCCACTTAAGGACTCTCCTCTGGCCTATGGTCATCTCAATGCCGAGAGGGATGTGGAGGGCGAGAGAG  
AGCGACTTCTCTCGGGCCACAGCCTTACAGCTGTGGAGCACGGTATCCTCTGCCGAAACAGAGGTTG  
+  
FFFFFFFFFFFFFFFFFFFFFFFFFFFFFFFFFFFFFFFFFFFFFFFFFFFFFFFFFFFFFFFFFFFFFFFFF  
FFFFFFFFFFFFFFFFFFFFFFFFFFFFFFFFFFFFFFFFFFFFFFFFFFFFFFFFFFFFFFFFFFFFFFFFF  
@A00155:342:HHGFNDSXY:1:2113:26901:32831 1:N:0:GAACCTAG+TCCGCATA  
GCGAGAGAGAGCGACTTCTCTCGGGCCACAGCCTTACAGCTGTGGAGCACGGTATCCTCTGCCGAA  
CAGAGGTTGGACAAGACCGGAGGGGTCTCCTAGTTCCAAAGGAGATGTACTCCGGGCTTGTTACGAC  
+  
FFFFFFFFFFFFFFFFFFFFFFFFFFFFFFFFFFFFFFFFFFFFFFFFFFFFFFFFFFFFFFFFFFFFFFFFF  
FFFFFFFFFFFFFFFFFFFFFFFFFFFFFFFFFFFFFFFFFFFFFFFFFFFFFFFFFFFFFFFFFFFFFFFFF:FF  
@A00155:342:HHGFNDSXY:1:2113:27724:35822 1:N:0:GAACCTAG+TCCGCATA  
AGGGATGTGGAGGGCGAGAGAGAGCGACTTCTCTCGGGCCACAGCCTTACAGCTGTAGAGCACGGTA  
TCCTCTGCCGAAACAGAGGTTGGACAAGACCGGAGGGGTCTCCTAGTTCCAAAGGAGATGTACTCCG  
+  
FFFFFFFFFFFFFFFFFFFFFFFFFFFFFFFFFFFFFFFFFFFFFFFFFFFFFFFFFFFFFFFFFFFFFFFFF  
FFFFFFFFFFFFFFFFFFFFFFFFFFFFFFFFFFFFFFFFFFFFFFFFFFFFFFFFFFFFFFFFFFFFFFFFF:FF  
@A00155:342:HHGFNDSXY:1:2114:26341:8061 1:N:0:GAACCTAG+TCCGCATA  
CTTCTCTCGGGCCACAGCCTTACAGCTGTGGAGCACGGTATCCTCTGCCGAAACAGAGGTTGGACAA  
GACCGGAGGGGTCTCCTAGTTCCAAAGGAGATGTACTCCGGGCTTGTTACGACCTACCA  
+  
FFFFFFFFFFFFFFFFFFFFFFFFFFFFFFFFFFFFFFFFFFFFFFFFFFFFFFFFFFFFFFFFFFFFFFFFF  
FFFFFFFFFFFFFFFFFFFFFFFFFFFFFFFFFFFFFFFFFFFFFFFFFFFFFFFFFFFFFFFFFFFFFFFFF  
@A00155:342:HHGFNDSXY:1:2114:2284:20447 1:N:0:GAACCTAG+TCCGCATA  
AGGGCGAGAGAGAGCGACTTCTCTCGGGCCACAGCCTTACAGCTGTGGAGCACGGTATCCTCTGCCG  
AAACAGAGGTTGGACAAGACCGGAGGGGTCTCCTAGTTCCAAAGGAGATGTACTCCGGGCTTGTTAC  
+  
FF,FFFFFFFF:FF,FFFFFFFFFFFFFFFFFFFFFFFF:FF:FFF:,FFFF:F:FFFF:FF,F:,FFFF:  
FF::FFF,:FFFF,FFFFFF:FFFFFFFF:FF:FFFF,FF:,FFFF,,FF:FFF:FFFFFFFFF  
@A00155:342:HHGFNDSXY:1:2114:21441:32017 1:N:0:GAACCTAG+TCCGCATA  
CTATGGTCATCTCAATGCCGAGAGGGATGTGGAGGGCGAGAGAGAGCGACTTCTCTCGGGCCACAGC  
CTTACAGCTGTGGAGCACGGTATCCTCTGCCGAAACAGAGGTTGGACAAGACCGGAGGGGTCTCCTAG  
+  
FFFFFFFFFFFFFFFFFFFFFFFFFFFFFFFFFFFFFFFFFFFFFFFFFFFFFFFFFFFFFFFFFFFFFFFFF  
FFFFFFFFFFFFFFFFFFFFFFFFFFFFFFFFFFFFFFFFFFFFFFFFFFFFFFFFFFFFFFFFFFFFFFFFF  
@A00155:342:HHGFNDSXY:1:2115:5258:35744 1:N:0:GAACCTAG+TCCGCATA  
GGATGTGGAGGGCGAGAGAGAGCGACTTCTCTCGGGCCACAGCCTTACAGCTGTGGAGCACGGTATC  
CTCTGCCGAAACAGAGGTTGGACAAGACCGGAGGGGTCTCCTGGTTCCAAAGGAGATGTACTCC  
+  
FFFFFFFFFFFFFFFFFFFFFFFFFFFFFFFFFFFFFFFFFFFFFFFFFFFFFFFFFFFFFFFFFFFFFFFFF  
FFFFFFFFFFFFFFFFFFFFFFFFFFFFFFFFFFFFFFFFFFFFFFFFFFFFFFFFFFFFFFFFFFFFFFFFF  
@A00155:342:HHGFNDSXY:1:2116:18150:33019 1:N:0:GAACCTAG+TCCGCATA  
CTTCTCTCGGGCCACAGCCTTACAGCTGTGGAGCACGGTATCCTCTGCCGAAACAGAGGTTGGACAA  
GACCGGAGGGGTCTCCTAGTTCCAAAGGAGATGTACTCCGGGCTTGTTACGACCTACC  
+

FFFFFFFFFFFFFFFFFFFFFFFFFFFFFFFFFFFFFFFFFFFFFFFFFFFFFFFFFFFFFFFFFFFFFFFF  
FFFFFFFFFFFFFFFFFFFFFFFFFFFFFFFFFFFFFFFFFFFFFFFFFFFFFFFFFFFFFFFFFFFFFFFF  
@A00155:342:HHGFNDSXY:1:2117:3549:19132 1:N:0:GAACCTAG+TCCGCATA  
TCGGCAGAGGATACCGTGCTCCACAGCTGTAAGGCTGTGGGCCCGAGAGAAGTCGCTCTCTCGCCC  
TCCACATCCCTCTCGGCATTGAGATGACCATAGGCCAGAGGAGAGTCCTTAAGTG  
+  
FFFFFFFFFFFFFFFFFFFFFFFFFFFFFFFFFFFFFFFFFFFFFFFFFFFFFFFFFFFFFFFFFFFFFFFF  
FFFFFFFFFFFFFFFFFFFFFFFFFFFFFFFFFFFFFFFFFFFFFFFFFFFFFFFFFFFFFFFFFFFFFFFF  
@A00155:342:HHGFNDSXY:1:2118:27778:6104 1:N:0:GAACCTAG+TCCGCATA  
GAGCGACTTCTCTCGGGCCCACAGCCTTACAGCTGTGGAGCACGGTATCCTCTGCCGAAACAGAGGTT  
GGACAAGACCGGAGGGGTCTCCTAGTTCCAAAGGAGATGTACTCCGGGCTTGTTACGACCTACCGTG  
+  
FF:FFFFFFFFFFFFFFFFFFFFFFFFFFFFFFFFFFFFFFFFFFFFFFFFFFFFFFFFFFFFFFFFFFFF  
FFFFFFFFFFFFFFFFFFFFFFFFFFFFFFFFFFFFFFFFFFFFFFFFFFFFFFFFFFFFFFFFFFFFFFFF  
@A00155:342:HHGFNDSXY:1:2118:1533:6558 1:N:0:GAACCTAG+TCCGCATA  
GGCAGAGGATACCGTGCTCCACAGCTGTAAGGCTGTGGGCCCGAGAGAAGTCGCTCTCTCTCGCCCTC  
TACATCCCTCTCGGCATTGAGATGACCATAGGCCAGAGGTGAGTCCTTAAGTGGACACAGCTGATCT  
+  
FFFFFFFFFFFFFFFFFF:FFFFFFFFFFFFFFFF:FFFF:FFF:FFFFFFFF:FFFF,F,FFF:FFFF:FFFF  
FFFFFFFFFFFF,FFFF,FF:F,:FFFF,:FFFF:FFFFFFFF,FF:,FFF,FFF:FFFFFFFF:FFFF  
@A00155:342:HHGFNDSXY:1:2118:16929:7733 1:N:0:GAACCTAG+TCCGCATA  
AGAGAGAGCGACTTCTCTCGGGCCCACAGCCTTACAGCTGTGGAGCACGGTATCCTCTGCCGAAACAG  
AGGTTGGACAAGACCGGAGGGGTCTCCTGGTTCCAAAGGAGATGTACTCCGGGCTTGTTACGACCTA  
+  
FFFFFFFFFFFFFFFFFFFFFFFFFFFFFFFFFFFFFFFFFFFFFFFFFFFFFFFFFFFFFFFFFFFF:FFFFFFFFFFFFFFFF  
FFFFFFFFFFFFFFFFFFFFFFFFFFFFFFFFFFFFFFFFFFFFFFFFFFFFFFFFFFFFFFFFFFFFFFFF  
@A00155:342:HHGFNDSXY:1:2118:32072:10473 1:N:0:GAACCTAG+TCCGCATA  
AGCGACTTCTCTCGGGCCCACAGCCTTACAGCTGTGGAGCACGGTATCCTCTGCCGAAACAGAGGTTG  
GACAAGACCGGAGGGGTCTCCTAGTTCCAAAGGAGATGTACTCCGGGCTTGTTACGACCTACCGTGT  
+  
FFFFFFFFFFFFFFFFFFFFFFFFFF:FFFFFFFFFFFFFFFFFFFFFFFFFFFFFFFFFFFFFFFFFFFF  
FFFFFFFFFFFFFFFFFFFFFFFFFFFFFFFFFFFFFFFFFFFFFFFFFFFFFFFFFFFFFFFFFFFF:FFFFFFFFFFFFFFFF  
@A00155:342:HHGFNDSXY:1:2118:24523:36166 1:N:0:GAACCTAG+TCCGCATA  
CTTCTCTCGGGCCCACAGCCTTACAGCTGTGGAGCACGGTATCCTCTGCCGAAACAGAGGTTGGACAA  
GACCGGAGGGGTCTCCTAGTTCCAAAGGAGATGTACTCCGGGCTTGTTACGACCTACCGTGTAAGTC  
+  
FFFFFFFFFFFFFFFFFFFFFFFFFFFFFFFFFFFFFFFFFFFFFFFFFFFFFFFFFFFFFFFFFFFF  
FFFFFFFFFFFFFFFFFFFFFFFFFFFFFFFFFFFFFFFFFFFFFFFFFFFFFFFFFFFFFFFFFFFF  
@A00155:342:HHGFNDSXY:1:2119:2130:5337 1:N:0:GAACCTAG+TCCGCATA  
CTTCTCTCGGGCCCACAGCCTTACAGCTGTGGAGCACGGTATCCTCTGCCGAAACAGAGGTTGGACAA  
GACCGGAGGGGTCTCCTAGTTCCAAAGGAGATGTACTCCGGGCTTGTTACGACCTACC  
+  
FFFFFFFFFFFFFFFFFFFFFFFFFFFFFFFFFFFFFFFFFFFFFFFFFFFFFFFFFFFFFFFFFFFF  
:FFFFFFFFFFFFFFFFFFFFFFFFFFFFFFFFFFFFFFFFFFFFFFFFFFFFFFFFFFFF:FFFFFFFF  
@A00155:342:HHGFNDSXY:1:2119:23918:12571 1:N:0:GAACCTAG+TCCGCATA  
ACCCCTCCGGTCTTGTCCAACCTCTGTTTCGGCAGAGGATACCGTGCTCCACAGCTGTAAGGCTGTGG  
GCCCGAGAGAAGTCGCTCTCTCTCGCCCTCCACATCCCTCTCGGCATTGAGATGACCATAGGCCAGAG  
+  
FFFFFFFFFFFFFFFFFFFFFFFFFFFFFFFFFFFFFFFFFFFFFFFFFFFFFFFFFFFFFFFFFFFF  
FFFFFFFFFFFFFFFFFFFFFFFFFFFFFFFFFFFFFFFFFFFFFFFFFFFFFFFFFFFFFFFFFFFF  
@A00155:342:HHGFNDSXY:1:2120:6605:6355 1:N:0:GAACCTAG+TCCGCATA  
TGACCATAGGCCAGAGGTGAGTCCTTAAGTGGACACAGCTGATCTAAGGCGGTGTGGCGGGGCATGGG  
TTTGAACCCCATGACGGTCGGAGTCTAGTAGGCTCCCTGATGAGTCCGTTCCAAGGACGACACCGTC  
+

FFFFFFFFFFFFFFFFFFFFFFFFFFFFFFFFFFFFFFFFFFFFFFFFFFFFFFFFFFFFFFFFFFFFFFFF  
FFFFFFFFFFFFFFFFFFFFFFFFFFFFFFFFFFFFFFFFFFFFFFFFFFFFFFFFFFFFFFFFFFFFFFFF,F,FFFFF  
@A00155:342:HHGFNDSXY:1:2120:27787:9596 1:N:0:GAACCTAG+TCCGCATA  
GAGAGGGATGTGGAGGGCGAGAGAGAGCGACTTCTCTCGGGCCCACAGCCTTACAGCTGTGGAGCACG  
GTATCCTCTGCCGAAACAGAGGTTGGACAAGACCGGAGGGGTCTCCTAGTTCCAAAGGAGATGTACTC  
+  
F:FFFFFFFFFFFFFFFFFFFFFFFFFFFFFFFFFFFFFFFFFFFFFFFFFFFFFFFFFFFFFFFFFFFFFFFF  
FFFFFFFFFFFFFFFFFFFFFFFFFFFFFFFFFFFFFFFFFFFFFFFFFFFFFFFFFFFFFFFFFFFFFFFF  
@A00155:342:HHGFNDSXY:1:2120:29279:12680 1:N:0:GAACCTAG+TCCGCATA  
GAGAGCGACTTCTCTCGGGCCCACAGCCTTACAGCTGTGGAGCACGGTATCCTCTGCCGAAACAGAGG  
TTGGACAAGACCGGAGGGGTCTCCTAGTTCCAAAGGAGATGTACTCCGGGCTTGTTACGACCTACCG  
+  
FFFFFFFFFFFFFFFFFFFFFFFFFFFFFFFFFFFFFFFFFFFFFFFFFFFFFFFFFFFFFFFFFFFFFFFF  
FFFFFFFFFFFFFFFFFFFFFFFFFFFFFFFFFFFFFFFFFFFFFFFFFFFFFFFFFFFFFFFFFFFFFFFF,F,FFFFFFFFFFFFFFFF  
@A00155:342:HHGFNDSXY:1:2120:25446:21324 1:N:0:GAACCTAG+TCCGCATA  
AGCGACTTCTCTCGGGCCCACAGCCTTACAGCTGTGGAGCACGGTATCCTCTGCCGAAACAGAGGTTG  
GACAAGACGGGAGGGGTCTCCTAGTTCCAAAGGAGATGTACTCCGGGCTTGTTACGACCTACCGTGT  
+  
F:FFFFFFFFFFFFFFFFFFFFFFFF:FFFFFFFFFFFFFFFFFFFFFFFFFFFFFFFFFFFFFFFF:FF  
FFFFFFFFFFFFFFFFFFFFFFFFFFFFFFFFFFFFFFFFFFFFFFFFFFFFFFFFFFFFFFFFFFFFFFFF:FFFFFFFFFFFFFFFF  
@A00155:342:HHGFNDSXY:1:2120:28212:23422 1:N:0:GAACCTAG+TCCGCATA  
GAGAGGGATGTGGAGGGCGAGAGAGAGCGACTTCTCTCGGGCCCACAGCCTTACAGCTGTGGAGCACG  
GTATCCTCTGCCGAAACAGAGGTTGGACAAGACCGGAGGGGTCTCCTAGTTCCAAAGGAGATGTACTC  
+  
FFFFFFFFFFFFFFFFFFFFFFFFFFFFFFFFFFFFFFFFFFFFFFFFFFFFFFFFFFFFFFFFFFFFFFFF  
FFFFFFFFFFFFFFFFFFFFFFFFFFFFFFFFFFFFFFFFFFFFFFFFFFFFFFFFFFFFFFFFFFFFFFFF  
@A00155:342:HHGFNDSXY:1:2120:15935:23860 1:N:0:GAACCTAG+TCCGCATA  
TCCTCTGCCGAAACAGAGGTTGGACAAGACCGGAGGGGTCTCCTAGTTCCAAAGGAGATGTACTCCGG  
GCTTGTTACGACCTACCGTGTAAGTCGTAGTCTAGTAGGCTACCTGACGAGTCCTTTTTAGGACGAA  
+  
FFFFFFFFFFFFFFFFFFFFFFFFFFFFFFFFFFFFFFFFFFFFFFFFFFFFFFFFFFFFFFFFFFFFFFFF  
FFFFFFFFFFFFFFFFFFFFFFFFFFFFFFFFFFFFFFFFFFFFFFFFFFFFFFFFFFFFFFFFFFFFFFFF  
@A00155:342:HHGFNDSXY:1:2120:31910:34522 1:N:0:GAACCTAG+TCCGCATA  
ATCCTCTGCCGAAACAGAGGTTGGACAAGACCGGAGGGGTCTCCTAGTTCCAAAGGAGATGTACTCCG  
GGCTTGTTACGACCTACCGTGTAAGTCGTAGTCTAGTAGGCTACCTGACGAGTCCTTTTTAGGACGA  
+  
FFFFFFFFFFFFFFFFFFFFFFFFFFFFFFFFFFFFFFFFFFFFFFFFFFFFFFFFFFFFFFFFFFFFFFFF  
FFFFFF:FFFFFF:FFFFFFFFFFFFFFFFFFFFFFFFFFFFFFFFFFFFFFFFFFFFFFFFFFFFFFFF:FF:  
@A00155:342:HHGFNDSXY:1:2121:5159:18349 1:N:0:GAACCTAG+TCCGCATA  
CTTCTCTCGGGCCCACAGCCTTACAGCTGTGGAGCACGGTATCCTCTGCCGAAACAGAGGTTGGACAA  
GACCGGAGGGGTCTCCTAGTTCCAAAGGAGATGTACTCCGGGCTTGTTACGACCTACCGTGTAAGTC  
+  
FFFFFFFFFFFFFFFFFFFFFFFFFFFFFFFFFFFFFFFFFFFFFFFFFFFFFFFFFFFFFFFF:FFFFFF:FFFFFFF  
:FFFFFFFFFFFFFFFFFFFFFFFF,F,FFFFFFFFFFFFFFFFFFFFFFFFFFFFFFFF,FFFFFFFFFFFFFFFF  
@A00155:342:HHGFNDSXY:1:2121:3522:34021 1:N:0:GAACCTAG+TCCGCATA  
ATCTCAATGCCGAGAGGGATGTGGAGGGCGAGAGAGAGCGACTTCTCTCGGGCCCACAGCCTTACAGC  
TGTGGAGCACGGTATCCTCTGCCGAAACAGAGGTTGGACAAGACCGGAGGGGTCTCCTAGTTCCAAAG  
+  
FFFFFFFFFFFFFFFFFFFFFFFF:FFFFFFFFFFFFFFFFFFFFFFFFFFFFFFFFFFFFFFFFFFFFFFFF  
FFFFFFFFFFFFFFFFFFFFFFFFFFFFFFFFFFFFFFFFFFFFFFFFFFFFFFFFFFFFFFFFFFFFFFFF  
@A00155:342:HHGFNDSXY:1:2122:18069:15562 1:N:0:GAACCTAG+TCCGCATA  
CTTCTCTCGGGCCCACAGCCTTACAGCTGTGGAGCACGGTATCCTCTGCCGAAACAGAGGTTGGACAA  
GACCGGTGGGGTCTCCTAGTTCCAAAGGAGATGTACTCCGGGCTTGTTACGACCTACCGTGTAAGTC  
+



FFFFFFFFFFFFFFFFFFFFFFFF:FFFFFFF:FFFFFFFFFFFFFFFFFFFFFFFFFFFFFFFFFFFFFFFFFFFFFFFFFFFFFFFFFFFFFFFF  
 FFFFFFFFFFFFFFFFFFFFFFFF:FFFFFFFFFFFFFFFFFFFFFFFFFFFFFFFFFFFFFFFFFFFFFFFFFFFFFFFFFFFFFFFF:FFFFF  
 @A00155:342:HHGFNDSXY:1:2122:29857:17691 1:N:0:GAACCTAG+TCCGCATA  
 CTTCTCTCGGGCCACAGCCTTACAGCTGTGGAGCACGGTATCCTCTGCCGAAACAGAGGTTGGACAA  
 GACCGGAGGGGTCTCCTAGTTCCAAAGGAGATGTACTCCGGGCTTGTTACGACCTACCGTGTAAGTC  
 +  
 FFFFFFFFFFFFFFFFFFFFFFFF:FFFFFFFFFFFFFFFFFFFFFFFFFFFFFFFFFFFFFFFFFFFFFFFFFFFFFFFFFFFFFFFF  
 FFFFFFFFFFFFFFFFFFFFFFFF:FFFFFFFFFFFFFFFFFFFFFFFFFFFFFFFFFFFFFFFFFFFFFFFFFFFFFFFFFFFFFFFF  
 @A00155:342:HHGFNDSXY:1:2122:29342:23782 1:N:0:GAACCTAG+TCCGCATA  
 GACTTCTCTCGGGCCACAGCCTTACAGCTGTGGAGCACGGTATCCTCTGCCGAAACAGAGGTTGGAC  
 AAGACCGGAGGGGTCTCCTGGTTCACAAAGGAGATGTACTCCGGGCTTGTTACGACCTACCGTGTAAG  
 +  
 FFFFFFFFFFFFFFFFFFFFFFFF:FFFFFFFFFFFFFFFFFFFFFFFFFFFFFFFFFFFFFFFFFFFFFFFFFFFFFFFFFFFFFFFF  
 FFFFFFFFFFFFFFFFFFFFFFFF:FFFFFFFFFFFFFFFFFFFFFFFFFFFFFFFFFFFFFFFFFFFFFFFFFFFFFFFFFFFFFFFF  
 @A00155:342:HHGFNDSXY:1:2122:19199:33238 1:N:0:GAACCTAG+TCCGCATA  
 CTTCTCTCGGGCCACAGCCTTACAGCTGTGGAGCACGGTATCCTCTGCCGAAACAGAGGTTGGACAA  
 GACCGGAGGGGTCTCCTAGTTCCAAAGGAGATGTACTCCGGGCTTGTTACGACCTACCGTGTAAGTC  
 +  
 FFFFFFFFFFFFFFFFFFFFFFFF:FFFFFFFFFFFFFFFFFFFFFFFFFFFFFFFFFFFFFFFFFFFFFFFFFFFFFFFFFFFFFFFF  
 FFFFFFFFFFFFFFFFFFFFFFFF:FFFFFFFFFFFFFFFFFFFFFFFFFFFFFFFFFFFFFFFFFFFFFFFFFFFFFFFFFFFFFFFF  
 @A00155:342:HHGFNDSXY:1:2122:1362:36511 1:N:0:GAACCTAG+TCCGCATA  
 GAGCGACTTCTCTCGGGCCACAGCCTTACAGCTGTGGAGCACGGTATCCTCTGCCGAAACAGAGGTT  
 GGACAAGACCGGAGGGGTCTCCTAGTTCCAAAGGAGATGTACTCCGGGCTTGTTACGACCTACCGTG  
 +  
 F:FFFFFFFFFFFFFFFFFFFFFFFFFFFFFFFFFFFFFFFFFFFFFFFFFFFFFFFFFFFFFFFF: F:FFFF  
 FFFFFF:FFFFFFFFFFFFFFFFFFFF,FFFFFFFFFFFF:FFFFFFFFFFFFFFFFFFFF:FFFFFFFF:FF:F  
 @A00155:342:HHGFNDSXY:1:2123:12210:6574 1:N:0:GAACCTAG+TCCGCATA  
 ACTTCTCTCGGGCCACAGCCTTACAGCTGTGGAGCACGGTATCCTCTGCCGAAACAGAGGTTGGACA  
 AGACCGGAGGGGTCTCCTAGTTCCAAAGGAGATGTACTCCGGGCTTGTTACGACCTACCGTGTAAGT  
 +  
 FFFFFFFFFFFFFFFFFFFFFFFF:FFFFFFFFFFFFFFFFFFFFFFFFFFFFFFFFFFFFFFFFFFFFFFFFFFFFFFFFFFFFFFFF  
 FFFFFFFFFFFFFFFFFFFFFFFF:FFFFFFFFFFFFFFFFFFFFFFFFFFFFFFFFFFFFFFFFFFFFFFFFFFFFFFFFFFFFFFFF  
 @A00155:342:HHGFNDSXY:1:2123:18954:9111 1:N:0:GAACCTAG+TCCGCATA  
 CTTACAGCTGTGGAGCACGGTATCCTCTGCCGAAACAGAGGTTGGACAAGACCGGAGGGGTCTCCTAG  
 TTCCAAAGGAGATGTACTCCGGGCTTGTTACGACCTACCGTGTAAGTCGTAGTCTAGTAAGCTACCT  
 +  
 FFF:FFFFFFFFFFFFFFFFFFFFFFFFFFFFFFFFFFFFFFFFFFFFFFFFFFFFFFFFFFFFFFFF:FFFFFFFF  
 FFFFFFFFFFFFFFFFFFFFFFFF:FFFFFFFFFFFFFFFFFFFFFFFFFFFFFFFFFFFFFFFFFFFFFFFFFFFFFFFFFFFFFFFF  
 @A00155:342:HHGFNDSXY:1:2123:9968:14935 1:N:0:GAACCTAG+TCCGCATA  
 GCGACTTCTCTCGGGCCACAGCCTTACAGCTGTGGAGCACGGTATCCTCTGCCGAAACAGAGGTTGG  
 ACAAGACCGGAGGGGTCTCCTAGTTCCAAAGGAGATGTACTCCGGGCTTGTTACGACCTACCG  
 +  
 FFFFFFFFFFFFFFFFFFFFFFFF:FFFFFFFFFFFFFFFFFFFFFFFFFFFFFFFFFFFFFFFFFFFFFFFFFFFFFFFFFFFFFFFF  
 FFFF:FFFFFFFFFFFFFFFFFFFFFFFFFFFFFFFFFFFFFFFFFFFFFFFFFFFFFFFFFFFFFFFF:FFFFFFFF  
 @A00155:342:HHGFNDSXY:1:2123:4544:20415 1:N:0:GAACCTAG+TCCGCATA  
 ACTTCTCTCGGGCCACAGCCTTACAGCTGTGGAGCACGGTATCCTCTGCCGAAACAGAGGTTGGACA  
 AGACCGGAGGGGTCTCCTAGTTCCAAAGGAGATGTACTCCGGGCTTGTTACGACCTACC  
 +  
 FFFFFFFFFFFFFFFFFFFFFFFF:FFFFFFFFFFFFFFFFFFFFFFFFFFFFFFFFFFFFFFFFFFFFFFFFFFFFFFFFFFFFFFFF  
 FF:FFFFFFFFFFFFFFFF:FFFFFFFFFFFFFFFFFFFFFFFFFFFFFFFFFFFFFFFFFFFFFFFFFFFFFFFF  
 @A00155:342:HHGFNDSXY:1:2124:3450:28667 1:N:0:GAACCTAG+TCCGCATA  
 TTACAGCTGTGGAGCACGGTATCCTCTGCCGAAACAGAGGTTGGACAAGACCGGAGGGGTCTCCTAGT  
 TCCAAAGGAGATGTACTCCGGGCTTGTTACGACCTACCGTGTAAGTCGTAGTCTAGTAGGCTACCTG  
 +

FFFFFFFFFFFFFFFFFFFFFFFFFFFFFFFFFFFFFFFFFFFFFFFFFFFFFFFFFFFFFFFFFFFFFFFFFFFFFFFF  
FFFFFFFFFFFFFFFFFFFFFFFFFFFFFFFFFFFFFFFFFFFFFFFFFFFFFFFFFFFFFFFFFFFFFFFFFFFFFFFF  
@A00155:342:HHGFNDSXY:1:2124:31882:31156 1:N:0:GAACCTAG+TCCGCATA  
GAGGGCGAGAGAGAGCGACTTCTCTCGGGCCACAGCCTTACAGCTGTGGAGCACGGTATCCTCTGCC  
GAAACAGAGGTTGGACAAGACCGGAGGGGTCTCCTAGTTCCAAAGGAGATGTACTCCGGGCTTGTTC  
+  
:FFFFFFFFFFFFFFFFFFFFFFFFFFFFFFFFFFFFFFFFFFFFFFFFFFFFFFFFFFFFFFFFFFFFFFFFFFFF  
FFFFFFFFFFFFFFFFFFFFFFFFFFFFFFFFFFFFFFFFFFFFFFFFFFFFFFFFFFFFFFFFFFFFFFFFFFFF  
@A00155:342:HHGFNDSXY:1:2125:23231:10755 1:N:0:GAACCTAG+TCCGCATA  
AGCGACTTCTCTCGGGCCACAGCCTTACAGCTGTGGAGCACGGTATCCTCTGCCGAAACAGAGGTTG  
GACAAGACCGGAGGGGTCTCCTAGTTCCAAAGGAGATGTACTCCGGGCTTGTTCACGACCTACCGTGT  
+  
FFFFFFFFFFFFFFFFFFFFFFFFFFFFFFFFFFFFFFFFFFFFFFFFFFFFFFFFFFFFFFFFFFFFFFFFFFFF  
FFFFFFFFFFFFFFFFFFFFFFFFFFFFFFFFFFFFFFFFFFFFFFFFFFFFFFFFFFFFFFFFFFFFFFFFFFFF  
@A00155:342:HHGFNDSXY:1:2125:2917:12806 1:N:0:GAACCTAG+TCCGCATA  
AGGGCGAGAGAGAGCGACTTCTCTCGGGCCACAGCCTTACAGCTGTAGAGCACGGTATCCTCTGCCG  
AAACAGAGGTTGGACAAGACCGGAGGGGTCTCCTAGTTCCAAAGGAGATGTACTCCGGGCTTGTTC  
+  
FFFFFFFFFFFFFF:FFFFFFFFFFFFFFFFFFFFFFFFFFFFFFFFFFFFFFFFFFFFFFFFFFFFFFFFFFFF  
FFFFFFFFFFFFFFFFFFFFFFFFFFFFFFFFFFFFFFFFFFFFFFFFFFFFFFFFFFFFFFFFFFFFFFFFFFFF  
@A00155:342:HHGFNDSXY:1:2125:1940:18004 1:N:0:GAACCTAG+TCCGCATA  
CCACATCCCTCTCGGCATTGAGATGACCATAGGCCAGAGGTGAGTCCTTAAGTGGACACAGCTGATCT  
AAGGCGGTGTGGCGGGCATGGGTTTGAACCCCATGACGGTCGGAGTCTAGTAGGCTCCCTGATGAG  
+  
FFFFFFFFFFFFFFFFFFFFFFFF:F:FFFFFFFFFFFFFFFFFFFFFFFFFFFFFFFFFFFFFFFFFFFFFFFFF:FFFFFFFF  
FFFFFFF,FFFFFFFFFFFF,FFFFFF:FFFFFFFFFFFFFFFFFFFF:FFF:F:F:FFF:FFF,FFFFFF:FFF  
@A00155:342:HHGFNDSXY:1:2125:7500:22247 1:N:0:GAACCTAG+TCCGCATA  
GAGCGACTTCTCTCGGGCCACAGCCTTACAGCTGTGGAGCACGGTATCCTCTGCCGAAACAGAGGTT  
GGACAAGACCGGAGGGGTCTCCTAGTTCCAAAGGAGATGTACTCCGGGCTTGTTCACGACCTACCGTG  
+  
FFFFFFFFFFFFFFFFFFFFFFFFFFFFFFFFFFFFFFFFFFFFFFFFFFFFFFFFFFFFFFFFFFFFFFFFFFFF  
FFFFFFFFF:FFFFFFFFFFFFFFFFFFFFFFFFFFFFFFFFFFFFFFFFFFFFFFFFFFFFFFFFFFFFFFFFF:F  
@A00155:342:HHGFNDSXY:1:2126:1994:5541 1:N:0:GAACCTAG+TCCGCATA  
GGATGTGGAGGGCGAGAGAGAGCGACTTCTCTCGGGCCACAGCCTTACAGCTGTGGAGCACGGTATC  
CTCTGCCGAAACAGAGGTTGGACAAGACCGGAGGGGTCTCCTGGTTCCAAAGGAGATGTACTCC  
+  
FFF:FFFFFFFFFFFFFFFFFFFFFFFFFFFFFFFFFFFFFFFFFFFFFFFFFFFFFFFFFFFFFFFFFFFFF:FFFFFFFF  
FFFF:FFFF:FFFFFFFFFFFFFFFFFFFFFFFFFFFFFFFFFFFFFFFFFFFFFFFFFFFFFFFFFFFFFFFFF:FFFFFFFF  
@A00155:342:HHGFNDSXY:1:2126:30743:25394 1:N:0:GAACCTAG+TCCGCATA  
GCATTGAGATGACCATAGGCCAGAGGTGAGTCCTTAAGTGGACACAGCTGATCTAAGGCGGTGTAGCG  
GGGCATGGGTTTGAACCCCATGACGGTCGGAGTCTAGTAGGCTCCCTGATGAGTCCGTTCCAAGGAC  
+  
FFFFFFFFFFFFFFFFFFFFFFFFFFFFFFFFFFFFFFFFFFFFFFFFFFFFFFFFFFFFFFFFFFFFFFFFFFFF,FFFFFFFF  
FFFFFFFFFFFFFFFFFFFFFFFFFFFFFFFFFFFFFFFFFFFFFFFFFFFFFFFFFFFFFFFFFFFFFFFFFFFF  
@A00155:342:HHGFNDSXY:1:2127:22580:3082 1:N:0:GAACCTAG+TCCGCATA  
GGATGTGGAGGGCGAGAGAGAGCGACTTCTCTCGGGCCACAGCCTTACAGCTGTGGAGCACGGTATC  
CTCTGCCGAAACAGAGGTTGGACAAGACCGGAGGGGTCTCCTAGTTCCAAAGGAGATGTACT  
+  
FFFFFFFFFFFFFFFFFFFFFFFFFFFFFFFFFFFFFFFFFFFFFFFFFFFFFFFFFFFFFFFFFFFFFFFFFFFF  
FFFFFFFFFFFFFFFFFFFFFFFFFFFFFFFFFFFFFFFFFFFFFFFFFFFFFFFFFFFFFFFFFFFFFFFFFFFF:FF  
@A00155:342:HHGFNDSXY:1:2127:30798:9549 1:N:0:GAACCTAG+TCCGCATA  
GGATGTGGAGGGCGAGAGAGAGCGACTTCTCTCGGGCCACAGCCTTACAGCTGTGGAGCACGGTATC  
CTCTGCCGAAACAGAGGTTGGACAAGACCGGAGGGGTCTCCTAGTTCCAAAGGAGATGTACTCC  
+

FFF:FFFFFFFFFFFFFFFFFFFFFFFFFFFFFFFFFFFFFFFFFFFFFFFFFFFFFFFFFFFFFFFFFFF  
FFFFFFFFFFFFFFFFFFFFFFFFFFFFFFFFFFFFFFFFFFFFFFFFFFFFFFFFFFFFFFFFFFFF  
@A00155:342:HHGFNDSXY:1:2127:2817:33113 1:N:0:GAACCTAG+TCCGCATA  
GGATGTGGAGGCGAGAGAGAGCGACTTCTCTCGGGCCCACAGCCTTACAGCTGTGGAGCACGGTATC  
CTCTGCCGAAACAGAGGTTGGACAAGACCGGAGGGGTCTCCTAGTTCAAAGGAGATGTACTCC  
+  
FFFFFFFFFFFFFFFFFFFFFFFFFFFFFFFFFFFFFFFFFFFFFFFFFFFFFFFFFFFFFFFFFFFF  
FFFFFFFFFFFFFFFFFFFFFFFFFFFFFFFFFFFFFFFFFFFFFFFFFFFFFFFFFFFFFFFFFFFF  
@A00155:342:HHGFNDSXY:1:2129:6497:2347 1:N:0:GAACCTAG+TCCGCATA  
TCCTCTGCCGAAACAGAGGTTGGACAAGACCGGAGGGGTCTCCTGGTTCAAAGGAGATGTACTCCGG  
GCTTGTTACGACCTACCGTGTAAGTCGTAGTCTAGTAGGCTACCTGACGAGTCCTTTTTAGGACGAA  
+  
,FFFFFF,FFFFFF,FF:F,FFFFFFFFFF:FF::F,:FFFFFFFFFFFF:FF:FFFF:FFF,FFF  
FF,:FFFFFFFFFFFF,FFFFFFFFFFFFFFFFFFFFFFFFFFFFFFFFFFFFFFFF,F,FFF:  
@A00155:342:HHGFNDSXY:1:2129:15944:10504 1:N:0:GAACCTAG+TCCGCATA  
CGAGAGGGATGTAGAGGCGAGAGAGAGCGACTTCTCTCGGGCCCACAGCCTTACAGCTGTGGAGCAC  
GGTATCCTCTGCCGAAACAGAGGTTGGACAAGACCGGAGGGGTCTCCTAGTTCAAAGGAGATGTACT  
+  
FFFFFFFFFFFFFFFFFFFFFFFFFFFFFFFFFFFFFFFFFFFFFFFFFFFFFFFFFFFFFFFFFFFF  
FFFFFFFFFFFFFFFFFFFFFFFFFFFFFFFFFFFFFFFFFFFFFFFFFFFFFFFFFFFFFFFFFFFF  
@A00155:342:HHGFNDSXY:1:2129:4878:10911 1:N:0:GAACCTAG+TCCGCATA  
CCTTACAGCTGTGGAGCACGGTATCCTCTGCCGAAACAGAGGTTGGACAAGACCGGAGGGGTCTCCTA  
GTTCAAAGGAGATGTACTCCGGGCTTGTTACGACCTACCGTGTAAGTCGTAGTCTAGTAGGCTACC  
+  
FFFFFFFFFFFFFFFFFFFFFFFFFFFFFFFFFFFFFFFFFFFFFFFFFFFFFFFFFFFFFFFFFFFF  
FFFFFFFFFFFFFFFFFFFFFFFFFFFFFFFFFFFFFFFFFFFFFFFFFFFFFFFFFFFFFFFFFFFF  
@A00155:342:HHGFNDSXY:1:2129:21423:13604 1:N:0:GAACCTAG+TCCGCATA  
ATGCCGAGAGGGATGTGGAGGCGAGAGAGAGCGACTTCTCTCGGGCCCACAGCCTTACAGCTGTGGA  
GCACGGTATCCTCTGCCGAAACAGAGGTTGGACAAGACCGGAGGGGTCTCCTGGTTCAAAGGAGATG  
+  
FFFFFFFFFFFFFFFFFFFFFFFFFFFFFFFFFFFFFFFFFFFFFFFFFFFFFFFFFFFFFFFFFFFF  
FFFFFFFFFFFFFFFFFFFFFFFFFFFFFFFFFFFFFFFFFFFFFFFFFFFFFFFFFFFFFFFFFFFF  
@A00155:342:HHGFNDSXY:1:2129:9489:18051 1:N:0:GAACCTAG+TCCGCATA  
ACCTCTGTTTCGGCAGAGGATACCGTGCTCCACAGCTGTAAGGCTGTGGGCCCGAGAGAAGTCGCTCT  
CTCTCGCCCTCCACATCCCTCTCGGCATTGAGATGACCATAGGCCAGAGGAGAGTCCTTAAGTGGAC  
+  
FFFFFFF,F,F:,F,FF:FFFFFFF:FFFFF:FF,FFFFFF,FF:FFF:F:FFFF:FFF,:,::F:F  
F:FFFF:FFFF:F,F,,::FFF::,FFF,F,FFFFFFFFF:F::F,::FFFF:FFFF,,FFF:F:FF  
@A00155:342:HHGFNDSXY:1:2129:30879:20619 1:N:0:GAACCTAG+TCCGCATA  
CTTCTCTCGGGCCCACAGCCTTACAGCTGTGGAGCACGGTATCCTCTGCCGAAACAGAGGTTGGACAA  
GACCGGAGGGGTCTCCTGGTTCAAAGGAGATGTACTCCGGGCTTGTTACGACCTACCGTGTAAGTC  
+  
F:FFFFFFFFFFFFFFFF:FFFF:F:FFF,FFFFFF,FFFF::FFFF:FFFF:FFFF:FFFFFFFF  
FFFF:F,FF:F,FF:FF::FFFFFFFF,FFFFFFFF:F:F:FFF:FFFFFFFFFFFF,FFFF::F  
@A00155:342:HHGFNDSXY:1:2129:19217:23187 1:N:0:GAACCTAG+TCCGCATA  
CTTCTCTCGGGCCCACAGCCTTACAGCTGTGGAGCACGGTATCCTCTGCCGAAACAGAGGTTGGACAA  
GACCGGAGGGGTCTCCTAGTTCAAAGGAGATGTACTCCGGGCTTGTTACGACCTACCGTGTAAGTC  
+  
FFFFFFFFFFFFFFFFFFFFFFFFFFFFFFFFFFFFFFFFFFFFFFFFFFFFFFFFFFFFFFFFFFFF  
FFFFFFFFFFFFFFFFFFFFFFFFFFFFFFFFFFFFFFFFFFFFFFFFFFFFFFFFFFFFFFFFFFFF  
@A00155:342:HHGFNDSXY:1:2129:20772:24940 1:N:0:GAACCTAG+TCCGCATA  
GTCATCTCAATGCCGAGAGGGATGTGGAGGCGAGAGAGAGCGACTTCTCTCGGGCCCACAGCCTTAC  
AGCTGTGGAGCACGGTATCCTCTGCCGAAACAGAGGTTGGACAAGACCGGAGGGGTCTCCTGGTTCCA

FFFFFFFFFFFFFFFF:FFF:FFFF:FFFFFFFFFFFFFFFFFFFFFFFF:FFFF:FFFFFFFFFFFFFFFF,FFF  
FFFFFFFFFFFFFFFFFFFFFFFFFFFFFFFFFFFFFFFFFFFFFFFFFFFFFFFFFFFFFFFFFFFFFFFF  
@A00155:342:HHGFNDSXY:1:2129:12527:26349 1:N:0:GAACCTAG+TCCGCATA  
GGATGTAGAGGGCGAGAGAGAGCGACTTCTCTCGGGCCACAGCCTTACAGCTGTGGAGCACGGTATC  
CTCTGCCGAAACAGAGGTTGGACAAGACCGGAGGGGTCTCCTAGTTCCAAAGGAGATGTACTCC  
+  
FFFFFFFFFFFFFFFFFFFFFFFFFFFFFFFFFFFFFFFFFFFFFFFFFFFFFFFFFFFFFFFFFFFFFFFF  
FFFFFFFFFFFFFFFFFFFFFFFFFFFFFFFFFFFFFFFFFFFFFFFFFFFFFFFFFFFFFFFFFFFFFFFF  
@A00155:342:HHGFNDSXY:1:2129:7581:29653 1:N:0:GAACCTAG+TCCGCATA  
CTTCTCTCGGGCCACAGCCTTACAGCTGTGGAGCACGGTATCCTCTGCCGAAACAGAGGTTGGACAA  
GACCGGAGGGGTCTCCTAGTTCCAAAGGAGGTGTACTCCGGGCTTGTTACGACCTACCGTGTAAGTC  
+  
FFFFFFFFFFFFFFFFFFFFFFFF:F:FFFF,FFFFFFFFFFFFFFFFFFFFFFFFFFFFFFFFFFFFFFFF  
FFF:FFFF:,FFFFFFFFF:FFFF:FFFF,:FFFFFFFFF,F:FFFFFFFFF:F:FFFFF  
@A00155:342:HHGFNDSXY:1:2130:18819:1767 1:N:0:GAACCTAG+TCCGCATA  
AAAGACTCACCTCTGGCCTATGGTCATCTCAATGCCGAGAGGGATGTGGAGGGCGAGAGAGAGCGACT  
TCTCTCGGGCCACAGCCTTACAGCTGTGGAGCACGGTATCCTCTGCCGAAACAGAGGTTGGACAAGA  
+  
FFFFFFFFFFFFFFFFFFFFFFFFFFFFFFFFFFFFFFFF:FFFFFFFFFFFFFFFFFFFFFFFFFFFFFFF  
FFFFFFFFFFFFFFFFFFFFFFFFFFFFFFFFFFFFFFFFFFFFFFFFFFFFFFFFFFFFFFFFFFFFFFFF  
@A00155:342:HHGFNDSXY:1:2130:28302:14152 1:N:0:GAACCTAG+TCCGCATA  
ACCTCTGTTTTCGGCAGAGGATACCGTGCTCCACAGCTGTAAGGCTGTGGGCCCGAGAGAAGTCGCTCT  
CTCTCGCCCTCTACATCCCTCTCGGCATTGAGATGACCATAGGCCAGAGGTGAGTCCTTAAGTGACA  
+  
FFFFFFFFFFF:FFFF:F:FFFFFFFFFFFFFFFF:FFFFFFFFFFFFFFFFFFFFFFFF:FFFF::FFFF  
FFFFFFFF:FFFFFFFFFFFFFFFFFFFFFFFFFFFFFFFFFFFFFFFFFFFFFFFF:FFFFFFFF:FFFFFFFF  
@A00155:342:HHGFNDSXY:1:2130:5520:22420 1:N:0:GAACCTAG+TCCGCATA  
AAGGACTCACCTCTGGCCTATGGTCATCTCAATGCCGAGAGGGATGTGAAGGGCGAGAGAGAGCGACT  
TCTCTCGGGCCACAGCCTTACAGCTGTGGAGCACGGTATCCTCTGCCGAAACAGAGGTTGGACAAGA  
+  
FFFFFFFFFFFFFFFFFFFFFFFFFFFFFFFFFFFFFFFFFFFFFFFFFFFFFFFFFFFFFFFFFFFFFFFF  
FFFFFFFFFFFFFFFFFFFFFFFFFFFFFFFFFFFFFFFFFFFFFFFFFFFFFFFFFFFFFFFF:FFFFFFFFFFFF  
@A00155:342:HHGFNDSXY:1:2130:25635:25128 1:N:0:GAACCTAG+TCCGCATA  
CGACTTCTCTCGGGCCACAGCCTTACAGCTGTGGAGCACGGTATCCTCTGCCGAAACAGAGGTTGGA  
CAAGACCGGAGGGGTCTCCTAGTTCCAAAGGAGATGTACTCCGGGCTTGTTACGACCTACCGTGTA  
+  
FFFFF:FFFFFFFFFFFFFFFFFFFFFFFF,FFFFFFFFF:F:FFF,FF:F,F:FFFFFFFFF,FFF  
FFF,FFF::F::FFFFFFFF,FF,FFFFFFFF:F,FFFFFFFF::FFFFF,FFFFFFFFF:,F,FF  
@A00155:342:HHGFNDSXY:1:2130:26612:25160 1:N:0:GAACCTAG+TCCGCATA  
GGATGTGGAGGGCGAGAGAGAGCGACTTCTCTCGGGCCACAGCCTTACAGCTGTGGAGCACGGTATC  
CTCTGCCGAAACAGAGGTTGGACAAGACCGGAGGGGTCTCCTAGTTCCAAAGGAGATGTACTCC  
+  
FFFFFFFFFFFFFFFFFFFFFFFFFFFFFFFFFFFFFFFFFFFFFFFFFFFFFFFFFFFFFFFFFFFFFFFF  
FFFFFFFFFFFFFFFFFFFFFFFFFFFFFFFFFFFFFFFFFFFFFFFFFFFFFFFFFFFFFFFFFFFFFFFF  
@A00155:342:HHGFNDSXY:1:2130:19768:27461 1:N:0:GAACCTAG+TCCGCATA  
AGCGACTTCTCTCGGGCCACAGCCTTACAGCTGTGGAGCACGGTATCCTCTGCCGAAACAGAGGTTG  
GACAAGACCGGAGGGGTCTCCTGGTTCCAAAGGAGATGTACTCCGGGCTTGTTACGACCTACCGTGT  
+  
FFFFFFFFFFFFFFFFFFFFFFFFFFFFFFFF:FFFFFFFFFFFFFFFFFFFFFFFFFFFFFFFFFFFFFFFF  
FFFFFFFFFFFFFFFFFFFFFFFFFFFFFFFFFFFFFFFFFFFFFFFFFFFFFFFFFFFFFFFF,FFFFFFF  
@A00155:342:HHGFNDSXY:1:2130:20103:27665 1:N:0:GAACCTAG+TCCGCATA  
AGCGACTTCTCTCGGGCCACAGCCTTACAGCTGTGGAGCACGGTATCCTCTGCCGAAACAGAGGTTG  
GACAAGACCGGAGGGGTCTCCTGGTTCCAAAGGAGATGTACTCCGGGCTTGTTACGACCTACCGTGT  
+

FFFFFFFFFFFFFFFFFFFFFFFFFFFFFFFFFFFFFFFFFFFFFFFFFFFFFFFFFFFFFFFFFFFFFFFF  
FFFFFFFFFFFFFFFFFFFFFFFFFFFFFFFFFFFFFFFFFFFFFFFFFFFFFFFFFFFFFFFFFFFFFFFF  
@A00155:342:HHGFNDSXY:1:2130:25301:32252 1:N:0:GAACCTAG+TCCGCATA  
TTAGATCAGCTGTGTCCACTTAAGGACTCACCTCTGGCCTATGGTCATCTCAATGCCGAGAGGGATGT  
GGAGGGCGAGAGAGAGCGACTTCTCTCGGGCCACAGCCTTACAGCTGTGGAGCACGGTATCCTCTGC  
+  
FFFFFFFFFFFFFFFFFFFFFFFFFFFFFFFFFFFFFFFFFFFFFFFFFFFFFFFFFFFFFFFFFFFFFFFF  
FFFFFFFFFFFFFFFFFFFFFFFFFFFFFFFFFFFFFFFFFFFFFFFFFFFFFFFFFFFFFFFFFFFFFFFF,FFFFFFFF  
@A00155:342:HHGFNDSXY:1:2132:24858:23249 1:N:0:GAACCTAG+TCCGCATA  
CGACTTCTCTCGGGCCACAGCCTTACAGCTGTGGAGCACGGTATCCTCTGCCGAAACAGAGGTTGGA  
CAAGACCGGAGGGGTCTCCTAGTTCCAAAGGAGATGTACTCCGGGCTTGTTACGACCTACC  
+  
FFFFFFFFFFFFFFFFFFFFFFFFFFFFFFFFFFFFFFFFFFFFFFFFFFFFFFFFFFFFFFFFFFFFFFFF  
FFFFFFFFFFFFFFFFFFFFFFFFFFFFFFFFFFFFFFFFFFFFFFFFFFFFFFFFFFFFFFFFFFFFFFFF:FF  
@A00155:342:HHGFNDSXY:1:2133:32506:4429 1:N:0:GAACCTAG+TCCGCATA  
CTCAATGCCGAGAGGGATGTAGAGGGCGAGAGAGAGCGACTTCTCTCGGGCCACAGCCTTACAGCTG  
TGGAGCACGGTATCCTCTGCCGAAACAGAGGTTGGACAAGACCGGAGGGGTCTCCTAGTTCCAAAGGA  
+  
FFF::FFFFFFFFF:,FFFFFFFFFFFFFFFFFFFFFFFFFFFFFFFFFFFFFFFFFFFFFFFFFFFFFFFFF,FFFFF  
FFFFFFFFF:FFFFFFFFFFFFFFFFFFFFFFFFFFFFFFFFFFFFFFFFFFFFFFFFFFFFFFFFFFFFFFFFF,FFFFF  
@A00155:342:HHGFNDSXY:1:2133:20302:13510 1:N:0:GAACCTAG+TCCGCATA  
CTTCTCTCGGGCCACAGCCTTACAGCTGTGGAGCACGGTATCCTCTGCCGAAACAGAGGTTGGACAA  
GACCGGAGGGGTCTCCTGGTTCCAAAGGAGATGTACTCCGGGCTTGTTACGACCTACCGTGTAAGTC  
+  
FFFFFFFFFFFFFFFFFFFFFFFFFFFFFFFFFFFFFFFFFFFFFFFFFFFFFFFFFFFFFFFFFFFFFFFF  
FFFFFFFFFFFFFFFFFFFFFFFFFFFFFFFFFFFFFFFFFFFFFFFFFFFFFFFFFFFFFFFFFFFFFFFF:FFFFFFFFFFFFFFFFFFFFFFFFF  
@A00155:342:HHGFNDSXY:1:2133:21612:15280 1:N:0:GAACCTAG+TCCGCATA  
GATCAGCTGTGTCCACTTAAGGACTCACCTCTGGCCTATGGTCATCTCAATGCCGAGAGGGATGTGAA  
GGGCGAGAGAGAGCGACTTCTCTCGGGCCACAGCCTTACAGCTGTGGAGCACGGTATCCTCTGCCGA  
+  
FFFFFFFFFFFFFFFFFFFFFFFFFFFFFFFFFFFFFFFFFFFFFFFFFFFFFFFFFFFFFFFFFFFFFFFF:FFFFF  
FFFFFFFFFFFFFFFFFFFFFFFFFFFFFFFFFFFFFFFFFFFFFFFFFFFFFFFFFFFFFFFFFFFFFFFF  
@A00155:342:HHGFNDSXY:1:2133:20356:22279 1:N:0:GAACCTAG+TCCGCATA  
CTTCTCTCGGGCCACAGCCTTACAGCTGTGGAGCACGGTATCCTCTGCCGAAACAGAGGTTGGACAA  
GACCGGAGGGGTCTCCTGGTTCCAAAGGAGATGTACTCCGGGCTTGTTACGACCTACCGTGTAAGTC  
+  
FFFFFFFFFFFFFFFFFFFFFFFFFFFFFFFFFFFFFFFFFFFFFFFFFFFFFFFFFFFFFFFFFFFFFFFF  
FFFFFFFFFFFFFFFFFFFFFFFFFFFFFFFFFFFFFFFFFFFFFFFFFFFFFFFFFFFFFFFFFFFFFFFF:FFFFFFFFFFFFFFFFFFFFFFFFF  
@A00155:342:HHGFNDSXY:1:2134:15365:4930 1:N:0:GAACCTAG+TCCGCATA  
TTAAGGACTCACCTCTGGCCTATGGTCATCTCAATGCCGAGAGGGATGTAGAGGGCGAGAGAGCGA  
CTTCTCTCGGGCCACAGCCTTACAGCTGTGGAGCACGGTATCCTCTGCCGAAACAGAGGTTGGACAA  
+  
FFFFFFFFFFFFFFFFFFFFFFFFFFFFFFFFFFFFFFFFFFFFFFFFFFFFFFFFFFFFFFFFFFFFFFFF  
F:FFFFFFFFFFFFFFFFFFFFFFFFFFFFFFFFFFFFFFFFFFFFFFFFFFFFFFFFFFFFFFFFFFFFFFFFF  
@A00155:342:HHGFNDSXY:1:2134:30798:8641 1:N:0:GAACCTAG+TCCGCATA  
CTTCTCTCGGGCCACAGCCTTACAGCTGTGGAGCACGGTATCCTCTGCCGAAACAGAGGTTGGACAA  
GACCGGAGGGGTCTCCTAGTTCCAAAGGAGATGTACTCCGGGCTTGTTACGACCTACCGTGTAAGTC  
+  
FFFFFFFFFFFFFFFFFFFFFFFFFFFFFFFFFFFFFFFFFFFFFFFFFFFFFFFFFFFFFFFFFFFFFFFF  
FFF:FFFFFFFFFFFFFFFFFFFFFFFFFFFFFFFFFFFFFFFFFFFFFFFFFFFFFFFFFFFFFFFFFFFFF:FFFFF  
@A00155:342:HHGFNDSXY:1:2134:15781:12258 1:N:0:GAACCTAG+TCCGCATA  
GATGTGGAGGGCGAGAGAGAGCGACTTCTCTCGGGCCACAGCCTTACAGCTGTGGAGCACGGTATCC  
TCTGCCGAAACAGAGGTTGGACAAGACCGGAGGGGTCTCCTAGTTCCAAAGGAGATGTACTCCGGGCT  
+

FFFFFFFFFFFFFFFFFFFFFFFFFFFFFFFFFFFFFFFFFFFFFFFFFFFFFFFFFFFFFFFFFFFFFFFF  
FFFFFFFFFFFFFFFFFFFFFFFFFFFFFFFFFFFFFFFFFFFFFFFFFFFFFFFFFFFFFFFFFFFFFFFF  
@A00155:342:HHGFNDSXY:1:2134:8784:30452 1:N:0:GAACCTAG+TCCGCATA  
CTTCTCTCGGGCCACAGCCTTACAGCTGTGGAGCACGGTATCCTCTGCCGAAACAGAGGTTGGACAA  
GACCGGAGGGGTCTCCTAGTTCCAAAGGAGATGTACTCCGGGCTTGTTACGACCTACCGTGTAAGTC  
+  
FFFFFFFFFFFFFFFFFFFFFFFFFFFFFFFFFFFFFFFFFFFFFFFFFFFFFFFFFFFFFFFFFFFFFFFF  
FFFFFFFFFFFFFFFFFFFFFFFFFFFFFFFFFFFFFFFFFFFFFFFFFFFFFFFFFFFFFFFFFFFFFFFF  
@A00155:342:HHGFNDSXY:1:2135:25599:1141 1:N:0:GAACCTAG+TCCGCATA  
AGGGATGTAGAGGGCGAGAGAGAGCGACTTCTCTCGGGCCACAGCCTTACAGCTGTGGAGCACGGTA  
TCCTCTGCCGAAACAGAGGTTGGACAAGACCGGAGGGGTCTCCTAGTTCCAAAGGAGATGTACTCCGG  
+  
FFFFF::F:FF:FFFFFFFFFFFFFFFFFFFFFFFFFFFFFFFFFFFFFFFFFFFFFFFFFFFFFFFF  
FFFFFFFFFFFFFFFFFFFFFFFFFFFFFFFFFFFFFFFFFFFFFFFFFFFFFFFFFFFFFFFFFFFFFFFF  
@A00155:342:HHGFNDSXY:1:2135:26603:12900 1:N:0:GAACCTAG+TCCGCATA  
GTATCCTCTGCCGAAACAGAGGTTGGACAAGACCGGAGGGGTCTCCTGGTTCCAAAGGAGATGTACTC  
CGGGCTTGTTACGACCTACCGTGTAAGTCGTAGTCTAGTAGGCTACCTGACGAGTCCTTTTATAGGAC  
+  
FFFFFFFFFFFFFFFFFFFFFFFFFFFFFFFFFFFFFFFFFFFFFFFFFFFFFFFFFFFFFFFFFFFFFFFF  
FFFFFFFFFFFFFFFFFFFFFFFFFFFFFFFFFFFFFFFFFFFFFFFFFFFFFFFFFFFFFFFFFFFFFFFF  
@A00155:342:HHGFNDSXY:1:2135:30662:14669 1:N:0:GAACCTAG+TCCGCATA  
TTAAGGACTCTCCTCTGGCCTATGGTCATCTCAATGCCGAGAGGGATGTGGAGGGCGAGAGAGAGCGA  
CTTCTCTCGGGCCACAGCCTTACAGCTGTGGAGCACGGTATCCTCTGCCGAAACAGAGGTTGGACAA  
+  
FFFFFFFFFFFFFFFFFFFFFFFFFFFFFFFFFFFFFFFFFFFFFFFFFFFFFFFFFFFFFFFFFFFFFFFF  
FFFFFFFFFFFFFFFFFFFFFFFFFFFFFFFFFFFFFFFFFFFFFFFFFFFFFFFFFFFFFFFFFFFFFFFF  
@A00155:342:HHGFNDSXY:1:2135:4517:21465 1:N:0:GAACCTAG+TCCGCATA  
CTTCTCTCGGGCCACAGCCTTACAGCTGTGGAGCACGGTATCCTCTGCCGAAACAGAGGTTGGACAA  
GACCGGAGGGGTCTCCTAGTTCCAAAGGAGATGTACTCCGGGCTTGTTACGACCTACCGTGTAAGTC  
+  
FFFFFFFFFFFFFFFFFFFFFFFFFFFFFFFFFFFFFFFFFFFFFFFFFFFFFFFFFFFFFFFFFFFFFFFF  
FFFFFFFFFFFFFFFFFFFFFFFFFFFFFFFFFFFFFFFFFFFFFFFFFFFFFFFFFFFFFFFFFFFFFFFF  
@A00155:342:HHGFNDSXY:1:2135:31521:30718 1:N:0:GAACCTAG+TCCGCATA  
AAGGCTGTGGGCCCAGAGAAGTCGCTCTCTCTCGCCCTCCACATCCCTCTCGGCATTGAGATGACCA  
TAGGCCAGAGGTGAGTCCTTAAGTGACACAGCTGATCTAAGGCGGTGTGGCGGGCATGGGTTTGAA  
+  
FFFFFFFFFFFFFFFFFFFFFFFFFFFFFFFFFFFFFFFFFFFFFFFFFFFFFFFFFFFFFFFFFFFFFFFF  
FFFFFFFFFFFFFFFFFFFFFFFFFFFFFFFFFFFFFFFFFFFFFFFFFFFFFFFFFFFFFFFFFFFFFFFF  
@A00155:342:HHGFNDSXY:1:2135:21667:32033 1:N:0:GAACCTAG+TCCGCATA  
AGAGAGAGCGACTTCTCTCGGGCCACAGCCTTACAGCTGTGGAGCACGGTATCCTCTGCCGAAACAG  
AGGTTGGACAAGACCGGAGGGGTCTCCTAGTTCCAAAGGAGATGTACTCCGGGCTTGTTACGACCTA  
+  
FFFFFFFFFFFFFFFFFFFFFFFFFFFFFFFFFFFFFFFFFFFFFFFFFFFFFFFFFFFFFFFFFFFFFFFF  
FFFFFFFFFFFFFFFFFFFFFFFFFFFFFFFFFFFFFFFFFFFFFFFFFFFFFFFFFFFFFFFFFFFFFFFF  
@A00155:342:HHGFNDSXY:1:2135:21314:33395 1:N:0:GAACCTAG+TCCGCATA  
AGAGAGAGCGACTTCTCTCGGGCCACAGCCTTACAGCTGTGGAGCACGGTATCCTCTGCCGAAACAG  
AGGTTGGACAAGACCGGAGGGGTCTCCTAGTTCCAAAGGAGATGTACTCCGGGCTTGTTACGACCTA  
+  
FFFFFFFFFFFFFFFFFFFFFFFFFFFFFFFFFFFFFFFFFFFFFFFFFFFFFFFFFFFFFFFFFFFFFFFF  
FFFFFFFFFFFFFFFFFFFFFFFFFFFFFFFFFFFFFFFFFFFFFFFFFFFFFFFFFFFFFFFFFFFFFFFF  
@A00155:342:HHGFNDSXY:1:2136:23737:3239 1:N:0:GAACCTAG+TCCGCATA  
AGAGAGAACGACTTCTCTCGGGCCACAGCCTTACAGCTGTGGAGCACGGTATCCTCTGCCGAAACAG  
AGGTTGGACAAGACCGGAGGGGTCTCCTAGTTCCAAAGGAGATGTACTCCGGGCTTGTTACGACCTA  
+

FFFFFFFFFFFFFFFFFFFFFFFFFFFFFFFFFFFFFFFFFFFFFFFFFFFFFFFFFFFFFFFFFFFFFFFF  
FFFFFFFFFFFFFFFFFFFFFFFFFFFFFFFFFFFFFFFFFFFFFFFFFFFFFFFFFFFFFFFFFFFFFFFF:FFFFFFFFFFFF  
@A00155:342:HHGFNDSXY:1:2136:26567:22138 1:N:0:GAACCTAG+TCCGCATA  
TTCTCTCGGGCCACAGCCTTACAGCTGTGGAGCACGGTATCCTCTGCCGAAACAGAGGTTGGACAAG  
ACCGGAGGGGTCTCCCAGTTCCAAAGGAGATGTACTCCGGGCTTGTTACGACCTACCGTGTAAGTCG  
+  
FFFFFFFFFFFFFFFFFFFFFFFFFFFFFFFFFFFFFFFFFFFFFFFFFFFFFFFFFFFFFFFFFFFFFFFF  
FFFFFFFFFFFFFFFFFFFFFFFFFFFFFFFFFFFFFFFFFFFFFFFFFFFFFFFFFFFFFFFFFFFFFFFF:FF  
@A00155:342:HHGFNDSXY:1:2137:6153:3537 1:N:0:GAACCTAG+TCCGCATA  
GTCATCTCAATGCCGAGAGGGATGTGGAGGGCGAGAGAGAGCGACTTCTCTCGGGCCACAGCCTTAC  
AGCTGTGGAGCACGGTATCCTCTGCCGAAACAGAGGTTGGACAAGACCGGAGGGGTCTCCTAGTTCCA  
+  
FFFFFFFFFFFFFFFFFFFFFFFFFFFFFFFFFFFFFFFFFFFFFFFFFFFFFFFFFFFFFFFFFFFFFFFF  
FFFFFFFFFFFFFFFFFFFFFFFFFFFFFFFFFFFFFFFFFFFFFFFFFFFFFFFFFFFFFFFFFFFFFFFF  
@A00155:342:HHGFNDSXY:1:2137:23493:8046 1:N:0:GAACCTAG+TCCGCATA  
TGTTTTCGGCAGAGGATACCGTGCTCCACAGCTGTAAGGCTGTGGGCCCGAGAGAAGTCGCTCTCTCTC  
GCCCTCCACATCCCTCTCGGCATAGAGATGACCATAGGCCAGAGGTGAGTCCTTAAGTGGACACAGCT  
+  
FFFFFFFFFFFFFFFFFFFFFFFFFFFFFFFFFFFFFFFFFFFFFFFFFFFFFFFFFFFFFFFFFFFFFFFF  
FFFFFFFFFFFFFFFFFFFFFFFFFFFFFFFFFFFFFFFFFFFFFFFFFFFFFFFFFFFFFFFFFFFFFFFF  
@A00155:342:HHGFNDSXY:1:2137:16387:9361 1:N:0:GAACCTAG+TCCGCATA  
GAGCGACTTCTCTCGGGCCACAGCCTTACAGCTGTGGAGCACGGTATCCTCTGCCGAAACAGAGGTT  
GGACAAGACCGGAGGGGTCTCCTAGTTCCAAAGGAGATGTACTCCGGGCTTGTTACGACCTACCGTG  
+  
FFFFFFFFFFFFFFFFFFFFFFFFFFFFFFFFFFFFFFFFFFFFFFFFFFFFFFFFFFFFFFFFFFFFFFFF  
FFFFFFFFFFFFFFFFFFFFFFFFFFFFFFFFFFFFFFFFFFFFFFFFFFFFFFFFFFFFFFFFFFFFFFFF  
@A00155:342:HHGFNDSXY:1:2137:10872:13463 1:N:0:GAACCTAG+TCCGCATA  
GAGCGACTTCTCTCGGGCCACAGCCTTACAGCTGTGGAGCACGGTATCCTCTGCCGAAACAGAGGTT  
GGACAAGACCGGAGGGGTCTCCTAGTTCCAAAGGAGATGTACTCCGGGCTTGTTACGACCTACCGTG  
+  
FFFFFFFFFFFFFFFFFFFFFFFFFFFFFFFFFFFFFFFFFFFFFFFFFFFFFFFFFFFFFFFFFFFFFFFF  
FFFFFFFFFFFFFFFFFFFFFFFFFFFFFFFFFFFFFFFFFFFFFFFFFFFFFFFFFFFFFFFFFFFFFFFF  
@A00155:342:HHGFNDSXY:1:2137:28836:22811 1:N:0:GAACCTAG+TCCGCATA  
GAGCGACTTCTCTCGGGCCACAGCCTTACAGCTGTGGAGCACGGTATCCTCTGCCGAAACAGAGGTT  
GGACAAGACCGGAGGGGTCTCCTAGTTCCAAAGGAGATGTACTCCGGGCTTGTTACGA  
+  
FFFFFFFFFFFFFFFFFFFFFFFFFFFFFFFFFFFFFFFFFFFFFFFFFFFFFFFFFFFFFFFFFFFFFFFF  
FFFFFF:FFFFFFFFFFFFFFFFFFFFFFFFFFFFFFFFFFFFFFFFFFFFFFFFFFFFFFFFFFFFFFFF  
F,F::F,FFFFFFFFFFFFFFFFFFFFFFFFFFFFFFFFFFFFFFFFFFFFFFFFFFFFFFFFFFFFFFFF  
@A00155:342:HHGFNDSXY:1:2138:11288:4946 1:N:0:GAACCTAG+TCCGCATA  
AGAGAGAGCGACTTCTCTCGGGCCACAGCCTTACAGCTGTGGAGCACGGTATCCTCTGCCGAAACAG  
AGGTTGGACAAGACCGGAGGGGTCTCCTGGTTCCAAAGGAGATGTACTCCGGGCTTGTTACGACCTA  
+  
FFFFF:FFFFFFFFFFFF:F:FFFFFFFFFFFFFFFFFFFFFFFFFFFFFFFFFFFFFFFFFFFFFFFF  
F,F::F,FFFFFFFFFFFFFFFFFFFFFFFFFFFFFFFFFFFFFFFFFFFFFFFFFFFFFFFFFFFFFFFF  
@A00155:342:HHGFNDSXY:1:2138:15076:10097 1:N:0:GAACCTAG+TCCGCATA  
TATGCCGAGAGGGATGTGGAGGGCGAGAGAGAGCGACTTCTCTCGGGCCACAGCCTTACAGCTGTGG  
AGCACGGTATCCTCTGCCGAAACAGAGGTTGGACAAGACCGGAGGGGTCTCCTAGTTCCAAAGGAGAT  
+  
FFFFFFFFFFFFFFFFFFFFFFFFFFFFFFFFFFFFFFFFFFFFFFFFFFFFFFFFFFFFFFFFFFFFFFFF  
FFFFFFFFFFFFFFFFFFFFFFFFFFFFFFFFFFFFFFFFFFFFFFFFFFFFFFFFFFFFFFFFFFFFFFFF  
@A00155:342:HHGFNDSXY:1:2138:23294:16031 1:N:0:GAACCTAG+TCCGCATA  
CCCTCCACATCCCTCTCGGCATTGAGATGACCATAGGCCAGAGGTGAGTCCTTAAGTGGACACAGCTG  
ATCTAAGGCGGTGTGGCGGGGCATGGGTTTGAACCCCATGACGGTCGGAGTCTAGTAGGCTTCCTGA  
+

FFFFFFFFFFFFFFFFFFFFF::FFFFFFFFFFFFFF:FFFFFFFFFFFFFFFFFFFFFFFFFFFFFFFFFFFFFFFFFFFFFFFFFFFFFFFF  
FFFFFFFFFFFFFFFFFFFF:F:FF,F:FFF:FFFFFFFFFFFF:FFFFFFFFFFFF:FFFFFFFFFFFFFFFFFFFFFFFFFFFFFFFF  
@A00155:342:HHGFNDSXY:1:2138:2302:19257 1:N:0:GAACCTAG+TCCGCATA  
CTTACAGCTGTGGAGCACGGTATCCTCTGCCGAAACAGAGGTTGGACAAGACCGGAGGGGTCTCCTAG  
TTCAAAGGAGATGTACTCCGGGCTTGTTACGACCTACCGTGTAAAGTCGTAGTCTAGTAGGCTACCT  
+  
FFFFFFFFFFFFFFFFFFFFFFFFFFFFFFFFFFFFFFFFFFFFFFFFFFFFFFFFFFFFFFFFFFFFFFFFFFFFFFFFFFFFF  
FFFFFFFFFFFFFFFFFFFFFFFFFFFFFFFFFFFFFFFFFFFFFFFFFFFFFFFFFFFFFFFFFFFFFFFFFFFFFFFFFFFF:F:  
@A00155:342:HHGFNDSXY:1:2138:11559:31250 1:N:0:GAACCTAG+TCCGCATA  
GGATGTAGAGGGCGAGAGAGAGCGACTTCTCTCGGGCCCACAGCCTTACAGCTGTGGAGCACGGTATC  
CTCTGCCGAAACAGAGGTTGGACAAGACCGGAGGGGTCTCCTAGTTCAAAGGAGATGTACTCC  
+  
FFFFFFFFFFFFFFFFFFFFFFFFFFFFFFFFFFFFFFFFFFFFFFFFFFFFFFFFFFFFFFFFFFFFFFFFFFFFFFFFFFFFF  
FFFFFFFFFFFFFFFFFFFFFFFFFFFFFFFFFFFFFFFFFFFFFFFFFFFFFFFFFFFFFFFFFFFFFFFFFFFFFFFFFFFF  
@A00155:342:HHGFNDSXY:1:2138:1063:33301 1:N:0:GAACCTAG+TCCGCATA  
AGAGAGCGACTTCTCTCGGGCCCACAGCCTTACAGCTGTGGAGCACGGTATCCTCTGCCGAAACAGAG  
GTTGGACAAGACCGGAGGGGTCTCCTAGTTCAAAGGAGATGTACTCCGGGCTTGTTACGAC  
+  
FF:F,FFF:FFF,FFFF:FFFFFFFFFFFFFFFFFFFFFFFFF:F,F:FFFFFFFFFFFFFF:F::FFF:F  
FFFFFFFFFFFFFFF:FFFFFFFF:F:FFF:FFFFFFFFFFFF,FFFFFF:F:F:FFFF,FFFF  
@A00155:342:HHGFNDSXY:1:2139:7021:12900 1:N:0:GAACCTAG+TCCGCATA  
GAGCGACTTCTCTCGGGCCCACAGCCTTACAGCTGTGGAGCACGGTATCCTCTGCCGAAACAGAGGTT  
GGACAAGACCGGAGGGGTCTCCTAGTTCAAAGGAGATGTACTCCGGGCTTGTTACGACCTACCGTG  
+  
FFFFFFFFFFFFFFFFFFFFFFFFFFFFFFFFFFFFFFFFFFFFFFFFFFFFFFFFFFFFFFFFFFFFFFFFFFFFFFFFFFFFF  
FFFFFFFFFFFFFFFFFFFFFFFFFFFFFFFFFFFFFFFFFFFFFFFFFFFFFFFFFFFFFFFFFFFFFFFFFFFFFFFFFFFF  
@A00155:342:HHGFNDSXY:1:2139:27471:31563 1:N:0:GAACCTAG+TCCGCATA  
TCTCTGCCGAAACAGAGGTTGGACAAGACCGGAGGGGTCTCCTAGTTCAAAGGAGATGTACTCCGG  
GCTTGTTACGACCTACCGTGTAAAGTCGTAGTCTAGTAGGCTACCTGACGAGTCCTTTTTAGGAC  
+  
FFFFFFFFFFFFFFFFFFFFFFFFFFFFFFFFFFFFFFFFFFFFFFFFFFFFFFFFFFFFFFFFFFFFFFFFFFFFFFFFFFFFF  
FFFFFFFFFFFFFFFFFFFFFFFFFFFFFFFFFFFFFFFFFFFFFFFFFFFFFFFFFFFFFFFFFFFFFFFFFFFFFFFFFFFF  
@A00155:342:HHGFNDSXY:1:2140:19768:14121 1:N:0:GAACCTAG+TCCGCATA  
TGCCGAGAGGGATGTGGAGGGCGAGAGAGAGCGACTTCTCTCGGGCCCACAGCCTTACAGCTGTGGAG  
CACGGTATCCTCTGCCGAAACAGAGGTTGGACAAGACCGGAGGGGTCTCCTGGTTCAAAGGAGATGT  
+  
FFFFFFFFFFFFFFFFFFFFFFFFFFFFFFFFFFFFFFFFFFFFFFFFFFFFFFFFFFFFFFFFFFFFFFFFFFFFFFFFFFFFF  
FFFFFFFFFFFFFFFFFFFFFFFFFFFFFFFFFFFFFFFFFFFFFFFFFFFFFFFFFFFFFFFFFFFFFFFFFFFFFFFFFFFF  
@A00155:342:HHGFNDSXY:1:2140:17734:16078 1:N:0:GAACCTAG+TCCGCATA  
CTCAATGCCGAGAGGGATGTGGAGGGCGAGAGAGAGCGACTTCTCTCGGGCCCACAGCCTTACAGCTG  
TGGAGCACGGTATCCTCTGCCGAAACAGAGGTTGGACAAGACCGGAGGGGTCTCCTAGTTCAAAGGA  
+  
FFFFFFFFFFFFFFFFFFFFFFFFFFFFFFFFFFFFFFFFFFFFFFFFFFFFFFFFFFFFFFFFFFFFFFFFFFFFFFFFFFFFF  
FFFFFFFFFFFFFFFFFFFFFFFFFFFFFFFFFFFFFFFFFFFFFFFFFFFFFFFFFFFFFFFFFFFFFFFFFFFFFFFFFFFF  
@A00155:342:HHGFNDSXY:1:2140:16351:16532 1:N:0:GAACCTAG+TCCGCATA  
GAGGGCGAGAGAGAGCGACTTCTCTCGGGCCCACAGCCTTACAGCTGTGGAGCACGGTATCCTCTGCC  
GAAACAGAGGTTGGACAAGACCGGAGGGGTCTCCTAGTTCAAAGGAGATGTACTCCGGGCTTGTTCA  
+  
FFFFFFFFFFFFFFFFFFFFFFFFFFFFFFFFFFFFFFFFFFFFFFFFFFFFFFFFFFFFFFFFFFFFFFFFFFFFFFFFFFFFF  
FFFFFFFFFFFFFFFFFFFFFFFFFFFFFFFFFFFFFFFFFFFFFFFFFFFFFFFFFFFFFFFFFFFFFFFFFFFFFFFFFFFF  
@A00155:342:HHGFNDSXY:1:2140:9896:22827 1:N:0:GAACCTAG+TCCGCATA  
CTCAATGCCGAGAGGGATGTGGAGGGCGAGAGAGAGCGACTTCTCTCGGGCCCACAGCCTTACAGCTG  
TGGAGCACGGTATCCTCTGCCGAAACAGAGGTTGGACAAGACCGGAGGGGTCTCCTGGTTCAAAGGA



FFFFFFFFFFFFFFFFFFFFFFFFFFFFFFFFFFFFFFFFFFFFFFFFFFFFFFFFFFFFFFFFFFFFFFFF  
FFFFFFFFFFFFFFFFFFFFFFFFFFFFFFFFFFFFFFFFFFFFFFFFFFFFFFFFFFFFFFFFFFFFFFFF  
@A00155:342:HHGFNDSXY:1:2140:19669:29324 1:N:0:GAACCTAG+TCCGCATA  
GAGAGAGAGCGACTTCTCTCGGGCCACAGCCTTACAGCTGTGGAGCACGGTATCCTCTGCCGAAACA  
GAGGTTGGACAAGACCGGAGGGGTCTCCTAGTTCCAAAGGAGATGTACTCCGAGCTTGTTACGACCT  
+  
FFFFFFFFFFFFFFFF:FFFFFFFFFFFFFFFFFFFFFFFFFFFFFFFFFFFFFFFFFFFFFFFFFFFFFFF  
FFFFFFFFFFFFFFFFFFFFFFFFFFFFFFFFFFFFFFFFFFFFFFFFFFFFFFFFFFFFFFFFFFFFFFFF  
@A00155:342:HHGFNDSXY:1:2140:23665:30483 1:N:0:GAACCTAG+TCCGCATA  
CTATGGTCATCTCAATGCCGAGAGGGATGTGGAGGGCGAGAGAGAGCGACTTCTCTCGGGCCACAGC  
CTTACAGCTGTGGAGCACGGTATCCTCTGCCGAAACAGAGGTTGGACAAGACCGGAGGGGTCTCCTAG  
+  
FFFFFFFFFFFFFFFFFFFFFFFF:FFFFFFFFFFFFFFFFFFFFFFFFFFFFFFFFFFFFFFFFFFFFFFFF  
FFFFFFFFFFFFFFFFFFFFFFFFFFFFFFFFFFFFFFFFFFFFFFFFFFFFFFFFFFFFFFFFFFFFFFFF  
@A00155:342:HHGFNDSXY:1:2140:23918:31548 1:N:0:GAACCTAG+TCCGCATA  
CTCTGGCCTATGGTCATCTCAATGCCGAGAGGGATGTGGAGGGCGAGAGAGAGCGACTTCTCTCGGGC  
CCACAGCCTTACAGCTGTGGAGCACGGTATCCTCTGCCGAAACAGAGGTTGGACAAGACCGGAGGGGT  
+  
FFFFFFFFFFFFFFFFFFFFFFFFFFFFFFFFFFFFFFFFFFFFFFFFFFFFFFFFFFFFFFFFFFFFFFFF  
FFFFFFFFFFFFFFFFFFFFFFFFFFFFFFFFFFFFFFFFFFFFFFFFFFFFFFFFFFFFFFFFFFFFFFFF  
@A00155:342:HHGFNDSXY:1:2140:2935:35289 1:N:0:GAACCTAG+TCCGCATA  
ATGCCGAGAGGGATGTGGAGGGCGAGAGAGAGCGACTTCTCTCGGGCCACAGCCTTACAGCTGTGGA  
GCACGGTATCCTCTGCCGAAACAGAGGTTGGACAAGACCGGAGGGGTCTCCTAGTTCCAAAGGAGATG  
+  
FFFFFFFFFFFFFFFFFFFFFFFFFFFFFFFFFFFFFFFFFFFFFFFFFFFFFFFFFFFFFFFFFFFFFFFF  
FFFFFFFFFFFFFFFFFFFFFFFFFFFFFFFFFFFFFFFFFFFFFFFFFFFFFFFFFFFFFFFFFFFFFFFF  
@A00155:342:HHGFNDSXY:1:2141:10872:2127 1:N:0:GAACCTAG+TCCGCATA  
GTCATCTCAATGCCGAGAGGGATGTGGAGGGCGAGAGAGAGCGACTTCTCTCGGGCCACAGCCTTAC  
AGCTGTGGAGCACGGTATCCTCTGCCGAAACAGAGGTTGGACAAGACCGGAGGGGTCTCCTAGTTCCA  
+  
FFFFFFFFFFFFFFFFFFFFFFFFFFFFFFFFFFFFFFFFFFFFFFFFFFFFFFFFFFFFFFFFFFFFFFFF  
FFFFFFFFFFFFFFFFFFFFFFFFFFFFFFFFFFFFFFFFFFFFFFFFFFFFFFFFFFFFFFFFFFFFFFFF  
@A00155:342:HHGFNDSXY:1:2141:30011:3333 1:N:0:GAACCTAG+TCCGCATA  
ATCTCAATGCCGAGAGGGATGTGGAGGGCGAGAGAGAGCGACTTCTCTCGGGCCACAGCCTTACAGC  
TGTGGAGCACGGTATCCTCTGCCGAAACAGAGGTTGGACAAGACCGGAGGGGTCTCCTGGTTCCAAAG  
+  
FFFFFFFFFFFFFFFFFFFFFFFF,FFFFFFFFFFFFFFFFFFFFFFFFFFFFFFFFFFFFFFFFFFFFFFFF  
FF:FFFFFFFFFFFFFFFFFFFFFFFF:FFFFFFFFFFFFFFFFFFFFFFFFFFFFFFFFFFFFFFFFFFFF  
@A00155:342:HHGFNDSXY:1:2141:11397:7513 1:N:0:GAACCTAG+TCCGCATA  
GCCCCACCACACCGCCTTAGATCAGCTGTGTCCACTTAAGGACTCACCTCTGGCCTATGGTCATCTCA  
ATGCCGAGAGGGATGTGGAGGGCGAGAGAGAGCGACTTCTCTCGGGCCACAGCCTTACA  
+  
FFFFFFFFFFFFFFFFFFFFFFFFFFFFFFFFFFFFFFFFFFFFFFFFFFFFFFFFFFFFFFFFFFFFFFFF  
FFFFFFFFFFFFFFFFFFFFFFFFFFFFFFFFFFFFFFFFFFFFFFFFFFFFFFFFFFFFFFFFFFFFFFFF  
@A00155:342:HHGFNDSXY:1:2141:32805:9017 1:N:0:GAACCTAG+TCCGCATA  
CTGTGTCCACTTAAGGACTCACCTCTGGCCTATGGTCATCTCAATGCCGAGAGGGATGTGGAGGGCGA  
GAGAGAGCGACTTCTCTCGGGCCACAGCCTTACAGCTGTGGAGCACGGTATCCTCTGCCGAAACAGA  
+  
FFFFFFFFFF:FFFFFFFFFFFFFFFFFFFFFFFFFFFFFFFFFFFFFFFFFFFFFFFFFFFFFFFFFFFFF  
FFFFFFFFFFFFFFFFFFFFFFFFFFFFFFFFFFFFFFFFFFFFFFFFFFFFFFFFFFFFFFFFFFFFFFFF:  
@A00155:342:HHGFNDSXY:1:2141:6858:9799 1:N:0:GAACCTAG+TCCGCATA  
CAATGCCGAGAGGGATGTGGAGGGCGAGAGAGAGCGACTTCTCTCGGGCCACAGCCTTACAGCTGTG  
GAGCACGGTATCCTCTGCCGAAACAGAGGTTGGACAAGACCGGAGGGGTCTCCTAGTTCCA  
+

FFFFFFFFFFFFFFFF:FFFFFFFFFFFFFFFFFFFFFFFFFFFFFFFFFFFFFFFFFFFFFFFF  
FFFFFFFF:F:FFFFFFFFFFFFFFFFFFFFFFFFFFFFFFFFFFFFFFFFFFFFFFFF  
@A00155:342:HHGFNDSXY:1:2141:19660:10238 1:N:0:GAACCTAG+TCCGCATA  
ACCTCTGGCCTATGGTCATCTCAATGCCGAGAGGGATGTAGAGGGCGAGAGAGAGCGACTTCTCTCGG  
GCCACAGCCTTACAGCTGTGGAGCACGGTATCCTCTGCCGAAACAGAGGTTGGACAAGACCGGAGGG  
+  
FFFFFFFFFFFFFFFFFFFFFFFFFFFFFFFFFFFFFFFFFFFFFFFFFFFFFFFFFFFFFFFF  
FFFFFFFFFFFFFFFFFFFFFFFFFFFFFFFFFFFFFFFFFFFFFFFFFFFFFFFFFFFFFFFF  
@A00155:342:HHGFNDSXY:1:2141:31295:24095 1:N:0:GAACCTAG+TCCGCATA  
AGAGAGAGCGACTTCTCTCGGGCCACAGCCTTACAGCTGTGGAGCACGGTATCCTCTGCCGAAACAG  
AGGTTGGACAAGACCGGAGGGGTCTCCTAGTTCCAAAGGAGATGTACTCCGGGCTTGTTACGACCT  
+  
FFFFFFFFFFFFFFFFFFFFFFFFFFFFFFFFFFFFFFFFFFFFFFFFFFFFFFFFFFFFFFFF  
FFF:FFFFFFFFFFFFFFFFFFFFFFFFFFFFFFFFFFFFFFFFFFFFFFFFFFFFFFFF  
@A00155:342:HHGFNDSXY:1:2141:22571:25426 1:N:0:GAACCTAG+TCCGCATA  
GCTCCACAGCTGTAAGGCTGTGGGCCCGAGAGAAGTCGCTCTCTCTGCCCTCCACATCCCTCTCGGC  
ATTGAGATGACCATAGGCCAGAGGTGAGTCCTTAAGTGACACAGCTGATCTAAGGCGGTGTGGTGGG  
+  
FFFFFFFFFFFFFFFFFFFFFFFFFFFFFFFFFFFFFFFFFFFFFFFFFFFFFFFFFFFFFFFF  
FFFFFFFFFFFFFFFF:FFFFFFFFFFFFFFFFFFFFFFFFFFFFFFFFFFFFFFFFFFFFFFFF  
@A00155:342:HHGFNDSXY:1:2141:17852:29559 1:N:0:GAACCTAG+TCCGCATA  
GGGCGAGAGAGAGCGACTTCTCTCGGGCCACAGCCTTACAGCTGTGGAGCACGGTATCCTCTGCCGA  
AACAGAGGTTGGACAAGACCGGAGGGGTCTCCTAGTTCCAAAGGAGATGTACTCCGGGCTTGTTACG  
+  
FFFFFFFFFFFFFFFFFFFFFFFFFFFFFFFFFFFFFFFFFFFFFFFFFFFFFFFFFFFFFFFF:FFFFFFFF  
FFFFFFFFFFFFFFFFFFFFFFFFFFFFFFFFFFFFFFFFFFFFFFFFFFFFFFFFFFFFFFFF  
@A00155:342:HHGFNDSXY:1:2142:16966:12524 1:N:0:GAACCTAG+TCCGCATA  
GAGAGGGATGTGGAGGGCGAGAGAGAGCGACTTCTCTCGGGCCACAGCCTTACAGCTGTGGAGCACG  
GTATCCTCTGCCGAAACAGAGGTTGGACAAGACCGGAGGGGTCTCCTAGTTCCAAAGGAGATGTACTC  
+  
FFFFFFFFFFFFFFFFFFFFFFFFFFFFFFFFFFFFFFFFFFFFFFFFFFFFFFFFFFFFFFFF  
FFFFFFFFFFFFFFFFFFFFFFFFFFFFFFFFFFFFFFFFFFFFFFFFFFFFFFFFFFFFFFFF  
@A00155:342:HHGFNDSXY:1:2143:29966:1407 1:N:0:GAACCTAG+TCCGCATA  
ACTTCTCTCGGGCCACAGCCTTACAGCTGTGGAGCACGGTATCCTCTGCCGAAACAGAGGTTGGACA  
AGACCGGAGGGGTCTCCTAGTTCCAAAGGAGATGTACTCCGGGCTTTTTCACGACCTACCGTGTAAAG  
+  
FFFFFFFFFFFFFFFFFFFFFFFFFFFFFFFFFFFFFFFFFFFFFFFFFFFFFFFFFFFFFFFF,FFFFFFFF  
FFFFFFFFFFFFFFFFFFFFFFFFFFFFFFFFFFFFFFFFFFFFFFFFFFFFFFFFFFFFFFFF  
@A00155:342:HHGFNDSXY:1:2143:10682:6965 1:N:0:GAACCTAG+TCCGCATA  
GGATGTGGAGGGCGAGAGAGAGCGACTTCTCTCGGGCCACAGCCTTACAGCTGTGGAGCACGGTATC  
CTCTGCCGAAACAGAGGTTGGACAAGACCGGAGGGGTCTCCTAGTTCCAAAGGAGATGTACTCC  
+  
FFFFFFFFFFFFFFFFFFFFFFFFFFFFFFFFFFFFFFFFFFFFFFFFFFFFFFFFFFFFFFFF  
FFFFFFFFFFFFFFFFFFFFFFFFFFFFFFFFFFFFFFFFFFFFFFFFFFFFFFFFFFFFFFFF  
@A00155:342:HHGFNDSXY:1:2143:11812:9111 1:N:0:GAACCTAG+TCCGCATA  
GCTGTGTCCACTTAAGGACTCACCTCTGGCCTATGGTCATCTCAATGCCGAGAGGGATGTAGAGGGCG  
AGAGAGAGCGACTTCTCTCGGGCCACAGCCTTACAGCTGTGGAGCACGGTATCCTCTGCCGAAACAG  
+  
F:FFFFFFFFFFFFFFFFFFFFFFFFFFFFFFFFFFFFFFFFFFFFFFFFFFFFFFFF:FFFFF:FFFFFFFFFFFFFFFFFFFFFFFF:FF  
FFFFFFFFF:FFFFFFFF:FFFFFFFFF:FF,FFF::FFFFF,FFFFFFFFFFFFFFFFFFFFFFFF,FFF  
@A00155:342:HHGFNDSXY:1:2143:3992:9659 1:N:0:GAACCTAG+TCCGCATA  
CTCCTCTGGCCTATGGTCATCTCAATGCCGAGAGGGATGTGGAGGGCGAGAGAGAGCGACTTCTCTCG  
GGCCACAGCCTTACAGCTGTGGAGCACGGTATCCTCTGCCGAAACAGAGGTTGGACAAGACCGGAGG  
+

FFFFFFFFFFFFFFFFFFFFFFFFFFFFFFFFFFFFFFFFFFFFFFFFFFFFFFFFFFFFFFFFFFFFFFFF  
FFFFFFFFFFFFFFFFFFFFFFFFFFFFFFFFFFFFFFFFFFFFFFFFFFFFFFFFFFFFFFFFFFFFFFFF  
@A00155:342:HHGFNDSXY:1:2143:7898:13886 1:N:0:GAACCTAG+TCCGCATA  
CTCAATGCCGAGAGGGATGTGGAGGGCGAGAGAGAGCGACTTCTCTCGGGCCCACAGCCTTACAGCTG  
TGGAGCACGGTATCCTCTGCCGAAACAGAGGTTGGACAAGACCGGAGGGGTCTCCTAGTTCCAAAGGA  
+  
FFFFFFFFFFFFFFFFFFFFFFFFFFFFFFFFFFFFFFFFFFFFFFFFFFFFFFFFFFFFFFFFFFFFFFFF  
FFFFFFFFFFFFFF,FFFFFFFFFFFFFFFFFFFFFFFFFFFFFFFFFFFFFFFFFFFFFFFFFFFFFFFF  
@A00155:342:HHGFNDSXY:1:2143:4553:25786 1:N:0:GAACCTAG+TCCGCATA  
GGATGTGGAGGGCGAGAGAGAGCGACTTCTCTCGGGCCCACAGCCTTACAGCTGTGGAGCACGGTATC  
CTCTGCCGAAACAGAGGTTGGACAAGACCGGAGGGGTCTCCTAGTTCCAAAGGAGATG  
+  
FFFFFFFFFFFFFFFFFFFFFFFFFFFFFFFFFFFFFFFFFFFFFFFFFFFFFFFFFFFFFFFFFFFFFFFF  
FFFFFFFFFFFFFFFFFFFFFFFFFFFFFFFFFFFFFFFFFFFFFFFFFFFFFFFFFFFFFFFFFFFFFFFF  
@A00155:342:HHGFNDSXY:1:2144:20039:9298 1:N:0:GAACCTAG+TCCGCATA  
AGAGAGAGCGACTTCTCTCGGGCCCACAGCCTTACAGCTGTGGAGCACGGTATCCTCTGCCGAAACAG  
AGGTTGGACAAGACCGGAGGGGTCTCCTGGTTCCAAAGGAGATGTACTCCGGGCTTGTTACAGACCTA  
+  
FFFFFFFFFFFFFFFFFFFFFFFFFFFFFFFFFFFFFFFFFFFFFFFFFFFFFFFFFFFFFFFFFFFFFFFF  
FFFFFFFFFFFFFFFFFFFFFFFFFFFFFFFFFFFFFFFFFFFFFFFFFFFFFFFFFFFFFFFFFFFFFFFF  
@A00155:342:HHGFNDSXY:1:2144:27579:9799 1:N:0:GAACCTAG+TCCGCATA  
TTAAGGACTCACCTCTGGCCTATGGTCATCTCAATGCCGAGAGGGATGTGGAGGGCGAGAGAGAGCGA  
CTTCTCTCGGGCCCACAGCCTTACAGCTGTGGAGCACGGTATCCTCTGCCGAAACAGAGG  
+  
FFFFFFFFFFFFFFFFFFFFFFFFFFFFFFFFFFFFFFFFFFFFFFFFFFFFFFFFFFFFFFFFFFFFFFFF  
FFFFFFFFFFFFFFFFFFFFFFFFFFFFFFFFFFFFFFFFFFFFFFFFFFFFFFFFFFFFFFFFFFFFFFFF  
@A00155:342:HHGFNDSXY:1:2144:11577:33567 1:N:0:GAACCTAG+TCCGCATA  
AAGGACTCACCTCTGGCCTATGGTCATCTCAATGCCGAGAGGGATGTGGAGGGCGAGAGAGAGCGACT  
TCTCTCGGGCCCACAGCCTTACAGCTGTGGAGCACGGTATCCTCTGCCGAAACAGAGGTTGGACAAGA  
+  
FFFFFFFFFFFFFFFFFFFFFFFFFFFFFFFFFFFFFFFFFFFFFFFFFFFFFFFFFFFFFFFFFFFFFFFF  
FFFFFFFFFFFFFFFFFFFFFFFFFFFFFFFFFFFFFFFFFFFFFFFFFFFFFFFFFFFFFFFFFFFFFFFF  
@A00155:342:HHGFNDSXY:1:2145:12355:4319 1:N:0:GAACCTAG+TCCGCATA  
ACCTCTGTTTCGGCAGAGGATACCGTGCTCCACAGCTGTAAGGCTGTGGGCCCGAGAGAAGTCGCTCT  
CTCTCGCCCTCCACATCCCTCTCGGCATTGAGATGACCATAGGCCAGAGGTGAGTCCTTAAGTGGACA  
+  
FFFFFFFFFFFFFFFFFFFFFFFFFFFFFFFFFFFFFFFFFFFFFFFFFFFFFFFFFFFFFFFFFFFFFFFF  
FFFFFFFFFFFFFFFFFFFFFFFFFFFFFFFFFFFFFFFFFFFFFFFFFFFFFFFFFFFFFFFFFFFFFFFF  
@A00155:342:HHGFNDSXY:1:2145:16568:6731 1:N:0:GAACCTAG+TCCGCATA  
CTGCCGAAACAGAGGTTGGACAAGACCGGAGGGGTCTCCTAGTTCCAAAGGAGATGTACTCCGGGCTT  
GTTACAGACCTACCGTGTAAGTCGTAGTCTAGTAGGCTACCTGACGAGTCCTTTTAGGACGAACTT  
+  
FFFFFFFFFFFF:F:FFFFFFFFFFFFFFFFFFFFFFFFFFFFFFFFFFFFFFFFFFFFFFFFFFFFFFFF  
FFFFFFFFFFFFFFFFFFFFFFFFFFFFFFFFFFFFFFFFFFFFFFFFFFFFFFFFFFFFFFFFFFFFFFFF  
@A00155:342:HHGFNDSXY:1:2145:2718:25363 1:N:0:GAACCTAG+TCCGCATA  
GGACTCTCCTCTGGCCTATGGTCATCTCAATGCCGAGAGGGATGTGGAGGGCGAGAGAGAGCGACTTC  
TCTCGGGCCCACAGCCTTACAGCTGTGGAGCACGGTATCCTCTGCCGAAACAGAGGTTGGACAA  
+  
FFFFFFFFFFFFFFFFFFFFFFFFFFFFFFFFFFFFFFFFFFFFFFFFFFFFFFFFFFFFFFFFFFFFFFFF  
FFFFFFFFFFFFFFFFFFFFFFFFFFFFFFFFFFFFFFFFFFFFFFFFFFFFFFFFFFFFFFFFFFFFFFFF  
@A00155:342:HHGFNDSXY:1:2146:24207:1955 1:N:0:GAACCTAG+TCCGCATA  
CACCTCTGGCCTATGGTCATCTCAATGCCGAGAGGGATGTGGAGGGCGAGAGAGAGCGACTTCTCTCG  
GGCCCACAGCCTTACAGCTGTGGAGCACGGTATCCTCTGCCGAAACAGAGGTTGGACAAGACCGGAGG  
+

FFFFFFFFFFFFFFFFFFFFFFFFFFFFFFFFFFFFFFFFFFFFFFFFFFFFFFFFFFFFFFFFFFFFFFFFFFFFFFFF  
FFFFFFFFFFFFFFFFFFFFFFFFFFFFFFFFFFFFFFFFFFFFFFFFFFFFFFFFFFFFFFFFFFFFFFFFFFFFFFFF  
@A00155:342:HHGFNDSXY:1:2146:22896:5196 1:N:0:GAACCTAG+TCCGCATA  
AGCGACTTCTCTCGGGCCCACAGCCTTACAGCTGTGGAGCACGGTATCCTCTGCCGAAACAGAGGATG  
GACAAGACCGGAGGGGTCTCCTAGTTCAAAGGAGATGTACTCCGGGCTTGTTACACGACCTACCGTGT  
+  
FFFFFFF:FF:FFFF:F:FFFFFFF,FFFFFFF:FFFFFFFFFFFFFFFFFFFFFFFF,F,FFF,  
FFFFFF:FFFFFFFFFFFFFFFFFFFFFFFFFFFFFFFFFFFFFFFFFFFFFFFFFFFFFFFFFFFFFFFF:  
@A00155:342:HHGFNDSXY:1:2146:30544:8641 1:N:0:GAACCTAG+TCCGCATA  
GCGAGAGAGAGCGACTTCTCTCGGGCCCACAGCCTTACAGCTGTGGAGCACGGTATCCTCTGCCGAAA  
CAGAGGTTGGACAAGACCGGAGGGGTCTCCTAGTTCAAAGGAGATGTACTCCGGGCTTGTTACACGAC  
+  
FFFFFFFFFFFFFFFFFFFFFFFFFFFFFFFFFFFFFFFFFFFFFFFFFFFFFFFFFFFFFFFFFFFFFFFFFFFF  
FFFFFFF:FFFFFFFFFFFFFFFFFFFFFFFFFFFFFFFFFFFFFFFFFFFFFFFFFFFFFFFFFFFFFFFF:FFF  
@A00155:342:HHGFNDSXY:1:2146:12084:12493 1:N:0:GAACCTAG+TCCGCATA  
AGCGACTTCTCTCGGGCCCACAGCCTTACAGCTGTGGAGCACGGTATCCTCTGCCGAAACAGAGGTTG  
GACAAGACCGGAGGGGTCTCCTGTTCAAAGGAGATGTACTCCGGGCTTGTTACACGACCTACCGTGT  
+  
FFFFFFFFFFFFFFFFFFFFFFFFFFFFFFFFFFFFFFFFFFFFFFFFFFFFFFFFFFFFFFFFFFFFFFFFFFFF  
FFFFFFFFFFFFFFFFFFFFFFFFFFFFFFFFFFFFFFFFFFFFFFFFFFFFFFFFFFFFFFFFFFFFFFFFFFFF  
@A00155:342:HHGFNDSXY:1:2146:3974:18427 1:N:0:GAACCTAG+TCCGCATA  
GAGCGACTTCTCTCGGGCCCACAGCCTTACAGCTGTGGAGCACGGTATCCTCTGCCGAAACAGAGGTT  
GGACAAGACCGGAGGGGTCTCCTAGTTCAAAGGAGATGTACTCCGGGCTTGTTACACGACCTACCGTG  
+  
FFFFFFFFFFFFFFFFFFFFFFFFFFFFFFFFFFFFFFFFFFFFFFFFFFFFFFFFFFFFFFFFFFFFFFFFFFFF  
FFFFFFFFFFFFFFFFFFFFFFFFFFFFFFFFFFFFFFFFFFFFFFFFFFFFFFFFFFFFFFFFFFFFFFFFFFFF  
@A00155:342:HHGFNDSXY:1:2146:14181:21230 1:N:0:GAACCTAG+TCCGCATA  
GGATGTAGAGGGCGAGAGAGAGCGACTTCTCTCGGGCCCACAGCCTTACAGCTGTGGAGCACGGTATC  
CTCTGCCGAAACAGAGGTTGGACAAGACCGGAGGGGTCTCCTAGTTCAAAGGAGATGTACTCCGGGC  
+  
FFFFFFFFFFFFFFFFFFFFFFFFFFFFFFFFFFFFFFFFFFFFFFFFFFFFFFFFFFFFFFFFFFFFFFFFFFFF  
FFFFFFFFFFFFFFFFFFFFFFFFFFFFFFFFFFFFFFFFFFFFFFFFFFFFFFFFFFFFFFFFFFFFFFFFFFFF  
@A00155:342:HHGFNDSXY:1:2146:8422:29293 1:N:0:GAACCTAG+TCCGCATA  
GTATCCTCTGCCGAAACAGAGGTTGGACAAGACCGGAGGGGTCTCCTAGTTCAAAGGAGATGTACTC  
CGGGCTTGTTACACGACCTACCGTGTAAGTCGTAGTCTAGTAGGCTACCTGACGAGTCCTTTTTAGGAC  
+  
FFFFFFFFFFFFFFFFFFFFFFFFFFFFFFFFFFFFFFFFFFFFFFFFFFFFFFFFFFFFFFFFFFFFFFFFFFFF  
FFFFFFFFFFFFFFFFFFFFFFFFFFFFFFFFFFFFFFFFFFFFFFFFFFFFFFFFFFFFFFFFFFFFFFFFFFFF  
@A00155:342:HHGFNDSXY:1:2146:4942:36166 1:N:0:GAACCTAG+TCCGCATA  
GTATCCTCTGCCGAAACAGAGGTTGGACAAGACCGGAGGGGTCTCCTAGTTCAAAGGAGATGTACTC  
CGGGCTTGTTACACGACCTACCGTGTAAGTCGTAGTCTAGTAGGCTACCTGACGAGTCCTTTTTAGGAC  
+  
FF:F,FFFFFFFFFFFFFFFFFFFFFFFFFFFFFFFFFFFFFFFFFFFFFFFFFFFFFFFFFFFFFFFFFFFF  
FF:,FFFF:FFFFFFFFFFFFFFFFFFFFFFFFFFFFFFFFFFFFFFFFFFFFFFFFFFFFFFFFFFFFF,  
@A00155:342:HHGFNDSXY:1:2147:14823:7717 1:N:0:GAACCTAG+TCCGCATA  
TGTGGAGGGCGAGAGAGAGCGACTTCTCTCGGGCCCACAGCCTTACAGCTGTGGAGCACGGTATCCTC  
TGCCGAAACAGAGGTTGGACAAGACCGGAGGGGTCTCCTGGTTCAAAGGAGATG  
+  
FFFFFFFFFFFFFFFFFFFFFFFFFFFFFFFFFFFFFFFFFFFFFFFFFFFFFFFFFFFFFFFFFFFFFFFFFFFF  
FFFFFFF,FF:FFFFFFFFFFFFFFFFFFFFFFFFFFFFFFFFFFFFFFFFFFFFFFFFFFFFFFFFFFFF  
@A00155:342:HHGFNDSXY:1:2147:10465:8500 1:N:0:GAACCTAG+TCCGCATA  
ATGCCGAGAGGGATGTGGAGGGCGAGAGAGAGCGACTTCTCTCGGGCCCACAGCCTTACAGCTGTGGA  
GCACGGTATCCTCTGCCGAAACAGAGGTTGGACAAGACCGGAGGGGTCTCCTGGTTCAAAGGAGATG  
+

FFFFFFFFFFFFFF, , FFFFF:FF, FFFFFFFFFFFFFFFF:FFF:FFFFFFFFFFFFFF, , FFFFF:FFF  
FFFFFFFFFFFFFFFFFFFFFFFFFFFFFFFFFFFFFFFFFFFFFFFFFFFFFFFFFFFFFFFFFFFFFFFFFFFFFFFF  
@A00155:342:HHGFNDSXY:1:2147:28944:8844 1:N:0:GAACCTAG+TCCGCATA  
ACTTCTCTCGGGCCACAGCCTTACAGCTGTGGAGCACGGTATCCTCTGCCGAAACAGAGGTTGGACA  
AGACCGGAGGGGTCTCCTAGTTCCAAAGGAGATGTACTCCGGGCTTGTTACGACCTACCGTGTAAGT  
+  
FFFFFFFFFFFFFFFFFFFFFFFFFFFFFFFFFFFFFFFFFFFFFFFFFFFFFFFFFFFFFFFFFFFFFFFFFFFFFFFF  
F, FFFFFFFFFFFFFFFFFF:FFFFFFFFFFFFFFFFFFFFFFFFFFFFFFFFFFFFFFFFFFFFFFFFFFFFFFFF  
@A00155:342:HHGFNDSXY:1:2147:10285:18458 1:N:0:GAACCTAG+TCCGCATA  
GCGACTTCTCTCGGGCCACAGCCTTACAGCTGTGGAGCACGGTATCCTCTGCCGAAACAGAGGTTGG  
ACAAGACCGGAGGGGTCTCCTAGTTCCAAAGGAGATGTACTCCGGGCTTGTTACGACCTACCGTGTA  
+  
FFFFFFFFFFFFFFFFFFFFFFFFFFFFFFFFFFFFFFFFFFFFFFFFFFFFFFFFFFFFFFFFFFFFFFFFFFFFFFFF  
FFFFF:FFFFFFFFFFFFFFFFFFFFFFFFFFFFFFFFFFFFFFFFFFFFFFFFFFFFFFFFFFFFFFFFFFFFFFFF  
@A00155:342:HHGFNDSXY:1:2148:23303:32362 1:N:0:GAACCTAG+TCCGCATA  
CGACTTCTCTCGGGCCACAGCCTTACAGCTGTGGAGCACGGTATCCTCTGCCGAAACAGAGGTTGGA  
CAAGACCGGAGGGGTCTCCTAGTTCCAAAGGAGATGTACTCCGGGCTTGTTACGACCTACCGGTAA  
+  
FFFFFFFFFFFFFFFFFFFFFFFFFFFFFFFFFFFFFFFFFFFFFFFFFFFFFFFFFFFFFFFFFFFFFFFFFFFFFFFF  
FFFFFFFFFFFFFFFFFFFFFFFFFFFFFFFFFFFFFFFFFFFFFFFFFFFFFFFFFFFFFFFFFFFFFFFFFFFFFFFF  
@A00155:342:HHGFNDSXY:1:2149:17770:14199 1:N:0:GAACCTAG+TCCGCATA  
TACTCCGGGCTTGTTACGACCTACCGTGTAAGTCGTAGTCTAGTAGGCTACCTGACGAGTCCTTTTT  
AGGACGAACTTACACAACCTCAAAGAGTAACGACGGTTTCGTCCTTGGAACGGACTIONCATCA  
+  
FFFFFFFFFFFFFFFFFFFFFFFFFFFFFFFFFFFFFFFFFFFFFFFFFFFFFFFFFFFFFFFFFFFFFFFFFFFFFFFF  
FFFFFFFFFFFFFFFFFFFFFFFFFFFFFFFFFFFFFFFFFFFFFFFFFFFFFFFFFFFFFFFFFFFFFFFFFFFFFFFF  
@A00155:342:HHGFNDSXY:1:2149:30318:18740 1:N:0:GAACCTAG+TCCGCATA  
ACCTCTGTTTCGGCAGAGGATACCGTGCTCCACAGCTGTAAGGCTGTGGGCCCGAGAGAAGTCGCTCT  
CTCTCGCCCTCCACATCCCTCTCGGCATTGAGATGACCATAGGCCAGAGGTGAGTCCTTAAGTGGACA  
+  
FFFFFFFFFFFFFFFFFFFFFFFFFFFFFFFFFFFFFFFFFFFFFFFFFFFFFFFFFFFFFFFFFFFFFFFFFFFFF:FFFFFFFF  
FFFFFFFFFFFFFFFFFFFFFFFFFFFFFFFFFFFFFFFFFFFFFFFFFFFFFFFFFFFFFFFFFFFFFFFFFFFFFFFF  
@A00155:342:HHGFNDSXY:1:2149:23240:35509 1:N:0:GAACCTAG+TCCGCATA  
GAGAGGGATGTAGAGGGCGAGAGAGAGCGACTTCTCTCGGGCCACAGCCTTACAGCTGTGGAGCACG  
GTATCCTCTGCCGAAACAGAGGTTGGACAAGACCGGAGGGGTCTCCTAGTTCCAAAGGAGATGTACTC  
+  
FFFFFFFFFFFFFFFFFFFFFFFFFFFFFFFFFFFFFFFFFFFFFFFFFFFFFFFFFFFFFFFFFFFFFFFFFFFFF:FFF:FFFFFFFFFFFFFFFF  
FFFFFFFFFFFFFFFFFFFFFFFFFFFFFFFFFFFFFFFFFFFFFFFFFFFFFFFFFFFFFFFFFFFFFFFFFFFFFFFF  
@A00155:342:HHGFNDSXY:1:2151:10185:20290 1:N:0:GAACCTAG+TCCGCATA  
GGATGTGGAGGGCGAGAGAGAGCGACTTCTCTCGGGCCACAGCCTTACAGCTGTGGAGCACGGTATC  
CTCTGCCGAAACAGAGGTTGGACAAGACCGGAGGGGTCTCCTGGTTCCAAAGGAGATGTACTCC  
+  
FFFFFFFFFFFFFFFFFFFFFFFFFFFFFFFFFFFFFFFFFFFFFFFFFFFFFFFFFFFFFFFFFFFFFFFFFFFFFFFF  
FFFFFFFFFFFFFFFFFFFFFFFFFFFFFFFFFFFFFFFFFFFFFFFFFFFFFFFFFFFFFFFFFFFFFFFFFFFFFFFF  
@A00155:342:HHGFNDSXY:1:2151:4734:32111 1:N:0:GAACCTAG+TCCGCATA  
GGGCGAGAGAGAGCGACTTCTCTCGGGCCACAGCCTTACAGCTGTGGAGCACGGTATCCTCTGCCGA  
AACAGAGGTTGGACAAGACCGGAGGGGTCTCCTGGTTCCAAAGGAGATGTACTCCGGGCTTGTTACG  
+  
FFF:FFFFFFFFFFFFFFFFFFFFFFFFFFFFFFFFFFFFFFFFFFFFFFFFFFFFFFFFFFFFFFFFFFFFFFFF  
FFFFFFFFFFFFFFFFFFFFFFFFFFFFFFFFFFFFFFFFFFFFFFFFFFFFFFFFFFFFFFFFFFFFFFFFFFFFFFFF  
@A00155:342:HHGFNDSXY:1:2151:4128:34162 1:N:0:GAACCTAG+TCCGCATA  
GGGCGAGAGAGAGCGACTTCTCTCGGGCCACAGCCTTACAGCTGTGGAGCACGGTATCCTCTGCCGA  
AACAGAGGTTGGACAAGACCGGAGGGGTCTCCTGGTTCCAAAGGAGATGTACTCCGGGCTTGTTACG  
+

```
FFFFFFFFFFFFFFFFFFFFFFFFFFFFFFFFFFFFFFFFFFFFFFFFFFFFFFFFFFFFFFFFFFFFF:FFFFFFFFFFFFFF  
:FFFFFFFF,FFFFFFFFFFFFFFFFFFFFFFFFFFFFFFFFFFFFFFFFFFFFFFFFFFFFFFFFFFFFFF@A00155:342:HHGFNDSXY:1:2152:6569:15405 1:N:0:GAACCTAG+TCCGCATA  
ATCTCAATGCCGAGAGGGATGTGGAGGGCGAGAGAGAGCGACTTCTCTCGGGCCCACAGCCTTACAGC  
TGTGGAGCACGGTATCCTCTGCCGAAACAGAGGTTTGACAAGACCGGAGGGGTCTCCAAGTTCAAAG  
+  
FFFFFFFFFFFFFFFFFFFFFFFFFFFFFFFFFFFFFFFFFFFFFFFFFFFFFFFFFFFFFFFFFFFFF,FFFFF  
FFFFFFFFFFF,FFF:FFFFFFFFFFFFFFFFFFFFFFFFFFFFFFFFFFFFFFFFFFFFFFFFFFFFF:FFFFFFFFFF:FFFFFFFFF:  
@A00155:342:HHGFNDSXY:1:2152:3857:17096 1:N:0:GAACCTAG+TCCGCATA  
GTCATCTCAATGCCGAGAGGGATGTGGAGGGCGAGAGAGAGCGACTTCTCTCGGGCCCACAGCCTTAC  
AGCTGTGGAGCACGGTATCCTCTGCCGAAACAGAGGTTTGACAAGACCGGAGGGGTCTCCTAGTTCCA  
+  
FFFFFFFFFFFFFFFFFFFFFFFFFFFFFFFFFFFFFFFFFFFFFFFFFFFFFFFFFFFFFFFFFFFFF  
FFFFFFFFFFFFFFFFFFFFFFFFFFFFFFFFFFFFFFFFFFFFFFFFFFFFFFFFFFFFFFFFFFFFF:FFFFFFFFFFFFFFFFFFFFFFFFFFFFF  
@A00155:342:HHGFNDSXY:1:2152:32235:17801 1:N:0:GAACCTAG+TCCGCATA  
GGCGAGAGAGAGCGACTTCTCTCGGGCCCACAGCCTTACAGCTGTGGAGCACGGTATCCTCTGCCGAA  
ACAGAGGTTTGACAAGACCGGAGGGGTCTCCTAGTTCAAAGGAGATGTACTCCGGGCTTGTTACAG  
+  
FFFFFFFFFFFFFFFFFFFFFFFFFFFFFFFFFFFFFFFFFFFFFFFFFFFFFFFFFFFFFFFFFFFFF:FFFFFFFFFFFFFFFFFFFFFFFFFFFFF  
FFFFFFFFFFFFFFFFFFFF,FFFFFFFFFFFFFFFFFFFFFFFFFFFFFFFFFFFFFFFFFFFFFFFFFFFFF::FFFFFFFFFFFFF  
@A00155:342:HHGFNDSXY:1:2152:4463:20369 1:N:0:GAACCTAG+TCCGCATA  
ATGCCGAGAGGGATGTAGAGGGCGAGAGAGAGCGACTTCTCTCGGGCCCACAGCCTTACAGCTGTGGA  
GCACGGTATCCTCTGCCGAAACAGAGGTTTGACAAGACCGGAGGGGTCTCCTAGTTCAAAGGAGAT  
+  
FFFFF:FFF,:.:FFFFFFFFFFFFFFFFFFFFFFFFFFFFFFFFFFFFFFFFFFFFFFFFFFFFF:FFFFFFFFFFFFFFFFFFFFFFFFFFFFF  
FFFF:FFFFFFFFFFFF,FFFFFFFFFFFFFFFFFFFFFFFFFFFFFFFFFFFFFFFFFFFFFFFFFFFFF:FFFFFFFFFFFFF,F:FF  
@A00155:342:HHGFNDSXY:1:2152:11153:25692 1:N:0:GAACCTAG+TCCGCATA  
GAGCGACTTCTCTCGGGCCCACAGCCTTACAGCTGTGGAGCACGGTATCCTCTGCCGAAACAGAGGTT  
GGACAAGACCGGAGGGGTCTCCTGGTTCAAAGGAGATGTACTCCGGGCTTGTTACAGACCTACCGTG  
+  
FFFFFFFFF:FFFFFF:FFFFFFFFFFFFFFFFFFFFFFFFFFFFFFFFFFFFFFFFFFFFFFFFFFFFF:FFFFFFFFFFFFFFFFFFFFF:FFFFFFFFFFFFFFFFFFFFF:  
FFFFFFFFFFFFFFFFF:FFFFFFFFF:FFFFFF:FFFFFFF,FFFFF,FFFF,F,FF:FFFFFFFFFFFFFFFF:F:FFF  
@A00155:342:HHGFNDSXY:1:2153:10818:15342 1:N:0:GAACCTAG+TCCGCATA  
GCGACTTCTCTCGGGCCCACAGCCTTACAGCTGTGGAGCACGGTATCCTCTGCCGAAACAGAGGTTGG  
ACAAGACCGGAGGGGTCTCCTAGTTCAAAGGAGATGTACTCCGGGCTTGTTACAGACCTACCGTGTA  
+  
FFFFFFFFFFFFFFFFFFFFFFFFFFFFFFFFFFFFFFFFFFFFFFFFFFFFFFFFFFFFFFFFFFFFF  
FFFFFFFFFFFFFFFFFFFFFFFFFFFFFFFFFFFFFFFFFFFFFFFFFFFFFFFFFFFFFFFFFFFFF:FFFFF  
@A00155:342:HHGFNDSXY:1:2153:7907:18129 1:N:0:GAACCTAG+TCCGCATA  
TTCTCTCGGGCCCACAGCCTTACAGCTGTGGAGCACGGTATCCTCTGCCGAAACAGAGGTTGGACAAG  
ACCGGAGGGGTCTCCTAGTTCAAAGGAGATGTACTCCGGGCTTGTTACAGACCTACCGTGTAAGTC  
+  
FFFFFFFFFFFFFFFFFFFFFFFFFFFFFFFFFFFFFFFFFFFFFFFFFFFFFFFFFFFFFFFFFFFFF:FFFFFFFFFFFFFFFFFFFFF  
FFFFFFFFFFFFFFFFFFFFFFFFFFFFFFFFFFFFFFFFFFFFFFFFFFFFFFFFFFFFFFFFFFFFF  
@A00155:342:HHGFNDSXY:1:2153:17454:30217 1:N:0:GAACCTAG+TCCGCATA  
AGGGCGAGAGAGAGCGACTTCTCTCGGGCCCACAGCCTTACAGCTGTGGAGCACGGTATCCTCTGCCG  
AAACAGAGGTTTGACAAGACCGGAGGGGTCTCCTAGTTCAAAGGAGATGTACTCCGGGCTTGTTAC  
+  
FFFFFFFFFFFFFFFFFFFFFFFFFFFFFFFFFFFFFFFFFFFFFFFFFFFFFFFFFFFFFFFFFFFFF  
FFFFFFFFFFFFFFFFFFFFFFFFFFFFFFFFFFFFFFFFFFFFFFFFFFFFFFFFFFFFFFFFFFFFF  
@A00155:342:HHGFNDSXY:1:2153:24885:33818 1:N:0:GAACCTAG+TCCGCATA  
GGATGTAGAGGGCGAGAGAGAGCGACTTCTCTCGGGCCCACAGCCTTACAGCTGTGGAGCACGGTATC  
CTCTGCCGAAACAGAGGTTTGACAAGACCGGAGGGGTCTCCTAGTTCAAAGGAGATGTACTCC
```

FFFFFFFF:FFFFFFFFFFFFFFFFFFFFFFFFFFFFFFFFFFFFFFFFFFFFFFFFFFFFFFFFFFFFFFFFFFFFFFFF:FF  
FFFFFFFFFFFFFFFFFFFFFFFFFFFFFFFFFFFFFFFFFFFFFFFFFFFFFFFFFFFFFFFFFFFFFFFFFFFFFFFF  
@A00155:342:HHGFNDSXY:1:2153:10854:36135 1:N:0:GAACCTAG+TCCGCATA  
GAGGGCGAGAGAGAGCGACTTCTCTCGGGCCCACAGCCTTACAGCTGTGGAGCACGGTATCCTCTGCC  
GAAACAGAGGTTGGACAAGACCGGAGGGGTCTCCTAGTTCCAAAGGAGATGTACTCCGGGCTTGTTC  
+  
FFFFFFFFFFFFFFFFFFFFFFFFFFFFFFFFFFFFFFFFFFFFFFFFFFFFFFFFFFFFFFFFFFFFFFFFFFFFFFFF  
FFFFFFFFFFFFFFFFFFFFFFFFFFFFFFFFFFFFFFFFFFFFFFFFFFFFFFFFFFFFFFFFFFFFFFFFFFFFFFFF  
@A00155:342:HHGFNDSXY:1:2154:29062:16438 1:N:0:GAACCTAG+TCCGCATA  
CTCAATGCCGAGAGGGATGTGGAGGGCGAGAGAGAGCGACTTCTCTCGGGCCCACAGCCTTACAGCTG  
TGGAGCACGGTATCCTCTGCCGAAACAGAGGTTGGACAAGACCGGAGGGGTCTCCTGGTTCCAAAGGA  
+  
FFFFFFFFFFFFFFFFFFFFFFFFFFFFFFFFFFFFFFFFFFFFFFFFFFFFFFFFFFFFFFFFFFFFFFFFFFFFFFFF  
FFFFFFFFFFFFFFFFFFFFFFFFFFFFFFFFFFFFFFFFFFFFFFFFFFFFFFFFFFFFFFFFFFFFFFFFFFFFFFFF  
@A00155:342:HHGFNDSXY:1:2154:28899:21950 1:N:0:GAACCTAG+TCCGCATA  
GAGAGGGATGTGGAGGGCGAGAGAGAGCGACTTCTCTCGGGCCCACAGCCTTACAGCTGTGGAGCACG  
GTATCCTCTGCCGAAACAGAGGTTGGACAAGACCGGAGGGGTCTCCTAGTTCCAAAGGAGATGTACTC  
+  
FFFFFFFFFFFFFFFFFFFFFFFFFFFFFFFFFFFFFFFFFFFFFFFFFFFFFFFFFFFFFFFFFFFFFFFFFFFFFFFF  
FFFFFFFFFFFFFFFFFFFFFFFFFFFFFFFFFFFFFFFFFFFFFFFFFFFFFFFFFFFFFFFFFFFFFFFFFFFFFFFF  
@A00155:342:HHGFNDSXY:1:2155:1452:4069 1:N:0:GAACCTAG+TCCGCATA  
GGATGTGGAGGGCGAGAGAGAGCGACTTCTCTCGGGCCCACAGCCTTACAGCTGTGGAGCACGGTATC  
CTCTGCCGAAACAGAGGTTGGACAAGACCGGAGGGGTCTCCTAGTTCCAAAGGAGATGTACT  
+  
FFFFFFFFFFFFFFFFFFFFFFFFFFFFFFFFFFFFFFFFFFFFFFFFFFFFFFFFFFFFFFFFFFFFFFFFFFFFFFFF  
FFF:FFFFFFFF:FFFFFFFF:FF:FFFF:FFFFFFFFFFFFFFFFFFFF,FFFFFFFF:FF  
@A00155:342:HHGFNDSXY:1:2155:17933:25848 1:N:0:GAACCTAG+TCCGCATA  
CCTTACAGCTGTGGAGCACGGTATCCTCTGCCGAAACAGAGGTTGGACAAGACCGGAGGGGTCTCCTA  
GTTCCAAAGGAGATGTACTCCGACTTGTTACGACCTACCGTGTAAGTCGTAGTCTAGTAGGCTACC  
+  
FF:FFFFFFFFFFFFFFFFFFFFFFFFFFFFFFFFFFFFFFFFFFFFFFFFFFFFFFFFFFFFFFFFFFFFFFFF  
FFFFFFFFFFFFFFFFFFFFFFFFFFFFFFFFFFFFFFFFFFFFFFFFFFFFFFFFFFFFFFFFFFFFFFFF  
@A00155:342:HHGFNDSXY:1:2155:18376:27148 1:N:0:GAACCTAG+TCCGCATA  
GGCCAGAGGTGAGTCCTTAAGTGGACACAGCTGATCTAAGGCGGTGTGGCGGGGCATGGGTTTGAACC  
CCCATGACGGTCGGAGTCTAGTAGGCTCCCTGATGAGTCCGTTCCAAGGACGACACCGTCGTTACTCT  
+  
FFFFFFFFFFFFFFFFFFFFFFFFFFFFFFFFFFFFFFFFFFFFFFFFFFFFFFFFFFFFFFFFFFFFFFFF:FFF  
FFFFFFFFFFFFFFFFFFFFFFFFFFFFFFFFFFFFFFFFFFFFFFFFFFFFFFFFFFFFFFFFFFFF,,FFFFFFFF  
@A00155:342:HHGFNDSXY:1:2156:8504:3035 1:N:0:GAACCTAG+TCCGCATA  
GGATGTAGAGGGCGAGAGAGAGCGACTTCTCTCGGGCCCACAGCCTTACAGCTGTGGAGCACGGTATC  
CTCTGCCGAAACAGAGGTTGGACAAGACCGGAGGGGTCTCCTAGTTCCAAAGGAGATGTACTCC  
+  
FFFFFFFFFFFFFFFFFFFFFFFFFFFFFFFFFFFFFFFFFFFFFFFFFFFFFFFFFFFFFFFFFFFFFFFFFFFF  
FFFFFFFFFFFFFFFFFFFFFFFFFFFFFFFF:FF,FFFFFFFFFFFFFFFFFFFF,FFFFFFFF:F  
@A00155:342:HHGFNDSXY:1:2156:32145:3677 1:N:0:GAACCTAG+TCCGCATA  
CAAGCCCGGAGTACATCTCCTTTGGAAGTAGGAGACCCCTCCGGTCTTGTCCAACCTCTGTTTCGGCA  
GAGGATACCGTGCTCCACAGCTGTAAGGCTGTGGGCCCGAGAGAAGTCGCTCTCTCTCGCCCTCTACA  
+  
FFFFFFFFFFFFFFFFFFFFFFFFFFFFFFFFFFFFFFFFFFFFFFFFFFFFFFFFFFFFFFFFFFFFFFFFFFFF  
FFFFFFFFFFFFFFFFFFFFFFFFFFFFFFFFFFFFFFFFFFFFFFFFFFFFFFFFFFFFFFFFFFFFFFFFFFFF  
@A00155:342:HHGFNDSXY:1:2156:17580:4100 1:N:0:GAACCTAG+TCCGCATA  
CTCAATGCCGAGAGGGATGTAGAGGGCGAGAGAGAGCGACTTCTCTCGGGCCCACAGCCTTACAGCTG  
TGGAGCACGGTATCCTCTGCCGAAACAGAGGTTGGACAAGACCGGAGGGGTCTCCTAGTTCCAAAGGA  
+

FFFFFFFFFFFFFFFFFFFFFFFFFFFFFFFFFFFFFFFFFFFFFFFFFFFFFFFFFFFFFFFFFFFFFFFF  
FFFFFFFFFFFFFFFFFFFFFFFFFFFFFFFFFFFFFFFFFFFFFFFFFFFFFFFFFFFFFFFFFFFFFFFF  
@A00155:342:HHGFNDSXY:1:2156:7726:20290 1:N:0:GAACCTAG+TCCGCATA  
TGCCCCGCCACACCGCCTTAGATCAGCTGTGTCCACTTAAGGACTCACCTCTGGCCTATGGTCATCTC  
AATGCCGAGAGGGATGTGGAGGGCGAGAGAGAGCGACTTCTCTCGGGCCCACAGCCTTACAGCTGTGG  
+  
FFFFFFFFFFFFFFFFFFFFFFFFFFFFFFFFFFFFFFFFFFFFFFFFFFFFFFFFFFFFFFFFFFFFFFFF  
FFFFFFFFFFFFFFFFFFFFFFFFFFFFFFFFFFFFFFFFFFFFFFFFFFFFFFFFFFFFFFFFFFFFFFFF  
@A00155:342:HHGFNDSXY:1:2156:7120:21308 1:N:0:GAACCTAG+TCCGCATA  
TGCCCCGCCACACCGCCTTAGATCAGCTGTGTCCACTTAAGGACTCACCTCTGGCCTATGGTCATCTC  
AATGCCGAGAGGGATGTGGAGGGCGAGAGAGAGCGACTTCTCTCGGGCCCACAGCCTTACAGCTGTGG  
+  
FFFFFFFFFFFFFFFFFFFFFFFFFFFFFFFFFFFFFFFFFFFFFFFFFFFFFFFFFFFFFFFFFFFFFFFF  
F:FFFFFF,::FF,FFF,FFFFFFFFFFFF:FF:FFF:FFFFFFFFFFFFFFFFFFFFFFFF:FFFFFFF  
@A00155:342:HHGFNDSXY:1:2156:5638:21903 1:N:0:GAACCTAG+TCCGCATA  
AGAGAGAGCGACTTCTCTCGGGCCCACAGCCTTACAGCTGTGGAGCACGGTATCCTCTGCCGAAACAG  
AGGTTGGACAAGACCGGAGGGGTCTCCTAGTTCCAAAGGAGATGTACTCCGGGCTTGTTACAGACCTA  
+  
FFFFFFFFFFFFFFFFFFFFFFFFFFFFFFFFFFFFFFFFFFFFFFFFFFFFFFFFFFFFFFFFFFFFFFFF  
FFFFFFFFFFFFFFFFFFFFFFFFFFFFFFFFFFFFFFFFFFFFFFFFFFFFFFFFFFFFFFFFFFFFFFFF  
@A00155:342:HHGFNDSXY:1:2156:7446:22874 1:N:0:GAACCTAG+TCCGCATA  
CCTTACAGCTGTGGAGCACGGTATCCTCTGCCGAAACAGAGGTTGGACAAGACCGGAGGGGTCTCCTA  
GTTCCAAAGGAGATGTACTCCGGGCTTGTTACAGACCTACCGTGTAAGTCGTAGTCTAGTAGGCTACC  
+  
FFFFFFF:FFFFFF:FFFFFFFFFFFFFFFFFFFFFFFFFFFFFFFFFFFFFFFFFFFFFFFFFFFFFFFF  
FFFFFFFFFFFFFFFFFFFFFFFFFFFFFFFFFFFFFFFFFFFFFFFFFFFFFFFFFFFFFFFFFFFFFFFF  
@A00155:342:HHGFNDSXY:1:2157:24279:14074 1:N:0:GAACCTAG+TCCGCATA  
AGAGAGAGCGACTTCTCTCGGGCCCACAGCCTTACAGCTGTGGAGCACGGTATCCTCTGCCGAAACAG  
AGGTTGGACAAGACCGGAGGGGTCTCCTAGTTCCAAAGGAGATGTACTCCGGGCTTGTTACAGACCTA  
+  
FFFFFFFFFFFFFFFFFFFFFFFFFFFFFFFFFFFFFFFFFFFFFFFFFFFFFFFFFFFFFFFFFFFFFFFF  
FFFFFFFFFFFFFFFFFFFFFFFFFFFFFFFFFFFFFFFFFFFFFFFFFFFFFFFFFFFFFFFFFFFFFFFF:  
@A00155:342:HHGFNDSXY:1:2157:26232:15013 1:N:0:GAACCTAG+TCCGCATA  
GATGTAGAGGGCGAGAGAGAGCGACTTCTCTCGGGCCCACAGCCTTACAGCTGTGGAGCACGGTATCC  
TCTGCCGAAACAGAGGTTGGACAAGACCGGAGGGGTCTCCTAGTTCCAAAGGAGATGTACTCCGGGCT  
+  
FFFFFFFFFFFFFFFFFFFFFFFFFFFFFFFFFFFFFFFFFFFFFFFFFFFFFFFFFFFFFFFFFFFFFFFF  
FFFFFFFFFFFFFFFFFFFFFFFFFFFFFFFFFFFFFFFFFFFFFFFFFFFFFFFFFFFFFFFFFFFFFFFF  
@A00155:342:HHGFNDSXY:1:2157:9010:15875 1:N:0:GAACCTAG+TCCGCATA  
CTTCTCTCGGGCCCACAGCCTTACAGCTGTGGAGCACGGTATCCTCTGCCGAAACAGAGGTTGGACAA  
GACCGGAGGGGTCTCCTGGTTCCAAAGGAGATGTACTCCGGGCTTGTTACAGACCTACCGTGTAAGTC  
+  
FFFFFFFFFFFFFFFFFFFFFFFFFFFFFFFFFFFFFFFFFFFFFFFFFFFFFFFFFFFFFFFFFFFFFFFF  
F:FFFFFFFFFFFFFFFFFFFFFFFFFFFFFFFFFFFFFFFFFFFFFFFFFFFFFFFFFFFFFFFFFFFFFFFF  
@A00155:342:HHGFNDSXY:1:2157:16034:22060 1:N:0:GAACCTAG+TCCGCATA  
ATCTCAATGCCGAGAGGGATGTAGAGGGCGAGAGAGAGCGACTTCTCTCGGGCCCACAGCCTTACAGC  
TGTGGAGCACGGTATCCTCTGCCGAAACAGAGGTTGGACAAGACCGGAGGGGTCTCCTAGTTCCAAAG  
+  
FFF:FFFFFFFFFFFFFFFFFFFFFFFFFFFFFFFFFFFFFFFFFFFFFFFFFFFFFFFFFFFFFFFFFFFF  
FFFFFFFFFFFFFFFFFFFFFFFFFFFFFFFFFFFFFFFFFFFFFFFFFFFFFFFFFFFFFFFFFFFFFFFF:  
@A00155:342:HHGFNDSXY:1:2158:11397:14152 1:N:0:GAACCTAG+TCCGCATA  
CAATGCCGAGAGGGATGTAGAGGGCGAGAGAGAGCGACTTCTCTCGGGCCCACAGCCTTACAGCTGTG  
GAGCACGGTATCCTCTGCCGAAACAGAGGTTGGACAAGACCGGAGGGGTCTCCTAGTTCCAAAGGAGA  
+



FFFFFFFFFFFFFFFFFFFFFFFFFFFFFFFFFFFFFFFFFFFFFFFFFFFFFFFFFFFFFFFFFFFFFFFF  
FFFFFFFFFFFFFFFFFFFFFFFFFFFFFFFFFFFFFFFFFFFFFFFFFFFFFFFFFFFFFFFFFFFFFFFF  
@A00155:342:HHGFNDSXY:1:2158:10185:16407 1:N:0:GAACCTAG+TCCGCATA  
GAGCGACTTCTCTCGGGCCACAGCCTTACAGCTGTGGAGCACGGTATCCTCTGCCGAAACAGAGGTT  
GGACAAGACCGGAGGGGTCTCCTAGTTCCAAAGGAGATGTACTCCGGGCTTGTTACACGAC  
+  
FFFFFFFFFFFFFFFFFFFFFFFFFFFFFFFFFFFFFFFFFFFFFFFFFFFFFFFFFFFFFFFFFFFFFFFF  
FFFFFFFFFFFFFFFFFFFFFFFFFFFFFFFFFFFFFFFFFFFFFFFFFFFFFFFFFFFFFFFFFFFFFFFF  
@A00155:342:HHGFNDSXY:1:2158:12111:26663 1:N:0:GAACCTAG+TCCGCATA  
AGCGACTTCTCTCGGGCCACAGCCTTACAGCTGTGGAGCACGGTATCCTCTGCCGAAACAGAGGTTG  
GACAAGACCGGAGGGGTCTCCTAGTTCCAAAGGAGATGTACTCCGGGCTTGTTACACGACCTACCGTGT  
+  
FFFFFFFFFFFFFFFFFFFFFFFFFFFFFFFFFFFFFFFFFFFFFFFFFFFFFFFFFFFFFFFFFFFFFFFF  
FFFFFFFFFFFFFFFFFFFFFFFFFFFFFFFFFFFFFFFFFFFFFFFFFFFFFFFFFFFFFFFFFFFFFFFF  
@A00155:342:HHGFNDSXY:1:2158:8703:30091 1:N:0:GAACCTAG+TCCGCATA  
TCCTCTGCCGAAACAGAGGTTGGACAAGACCGGAGGGGTCTCCTAGTTCCATAGGAGATGTACTCCGG  
GCTTGTTACACGACCTACCGTGTAAAGTCGTAGTCTAGTAGGCTACCTGACGAGTCCTTTTTAGGACGAA  
+  
FFFFFFFFFFFFFFFFFFFFFFFFFFFFFFFFFFFFFFFFFFFFFFFFFFFFFFFFFFFFFFFFFFFFFFFF  
FFF:FFFFFFFFF:FFFFF:F:FFFFFFFFFFFFFFFFFFFFFFFFFFFFFFFFFFFFFFFFFFFFFFFF  
@A00155:342:HHGFNDSXY:1:2159:13187:27367 1:N:0:GAACCTAG+TCCGCATA  
CTCTGGCCTATGGTCATCTCAATGCCGAGAGGGATGTGAAGGGCGAGAGAGAGCGACTTCTCTCGGGC  
CCACAGCCTTACAGCTGTGGAGCACGGTATCCTCTGCCGAAACAGAGGTTGGACAAGAC  
+  
FFFFFFFFFFFFFFFFFFFFFFFFFFFFFFFFFFFFFFFFFFFFFFFFFFFFFFFFFFFFFFFFFFFFFFFF  
FFFFFFFFFFFFFFFFFFFFFFFFFFFFFFFFFFFFFFFFFFFFFFFFFFFFFFFFFFFFFFFFFFFFFFFF  
@A00155:342:HHGFNDSXY:1:2159:27950:29168 1:N:0:GAACCTAG+TCCGCATA  
CTTCTCTCGGGCCACAGCCTTACAGCTGTGGAGCACGGTATCCTCTGCCGAAACAGAGGTTGGACAA  
GACCGGAGGGGTCTCCTAGTTCCAAAGGAGATGTACTCCGGGCTTGTTACACGACCTACCGTGTAAAGTC  
+  
FFFFFFFFFFFFFFFFFFFFFFFFFFFFFFFFFFFFFFFFFFFFFFFFFFFFFFFFFFFFFFFFFFFFFFFF  
FFFFFFFFFFFFFFFFFFFFFFFFFFFFFFFFFFFFFFFFFFFFFFFFFFFFFFFFFFFFFFFFFFFFFFFF  
@A00155:342:HHGFNDSXY:1:2159:26982:30812 1:N:0:GAACCTAG+TCCGCATA  
CTTCTCTCGGGCCACAGCCTTACAGCTGTGGAGCACGGTATCCTCTGCCGAAACAGAGGTTGGACAA  
GACCGGAGGGGTCTCCTAGTTCCAAAGGAGATGTACTCCGGGCTTGTTACACGACCTACCGTGTAAAGTC  
+  
FFFFFFFFFFFFFFFFFFFFFFFFFFFFFFFFFFFFFFFFFFFFFFFFFFFFFFFFFFFFFFFFFFFFFFFF  
:FFFFFFFFFFFFFFFFFFFFFFFFFFFFFFFFFFFFFFFFFFFFFFFFFFFFFFFFFFFFFFFFFFFFFFFF  
@A00155:342:HHGFNDSXY:1:2159:21169:33520 1:N:0:GAACCTAG+TCCGCATA  
CAATGCCGAGAGGGATGTGGAGGGCGAGAGAGAGCGACTTCTCTCGGGCCACAGCCTTACAGCTGTG  
GAGCACGGTATCCTCTGCCGAAACAGAGGTTGGACAAGACCGGAGGGGTCTCCTAGTTCCAAAGGAGA  
+  
FFFFFFFFFFFFFFFFF:FFFFFFFFFFFFFFFFFFFFFFFFFFFFFFFFFFFFFFFFFFFFFFFFFFFFF  
FFFFFFFFFFFFFFFFFFFFFFFFFFFFFFFFFFFFFFFFFFFFFFFFFFFFFFFFFFFFFFFFFFFFFFFF  
@A00155:342:HHGFNDSXY:1:2159:20907:36385 1:N:0:GAACCTAG+TCCGCATA  
TCAATGCCGAGAGGGATGTGGAGGGCGAGAGAGAGCGACTTCTCTCGGGCCACAGCCTTACAGCTGT  
GGAGCACGGTATCCTCTGCCGAAACAGAGGTTGGACAAGACCGGAGGGGTCTCCTAGTTCCAAAG  
+  
F:FFF::::::::::F,:,,,F:FF,:FF::F,:F:F::,:,:,,,F:FFF,:F,F,F:,F,F  
:,FF::,F::F,,F:FF,FF:F::FFF:F,FF::,FFFF,,F:F::FF,,:F,,F:FFF,F::F  
@A00155:342:HHGFNDSXY:1:2160:23918:12289 1:N:0:GAACCTAG+TCCGCATA  
GTCATCTCAATGCCGAGAGGGATGTGGAGGGCGAGAGAGAGCGACTTCTCTCGGGCCACAGCCTTAC  
AGCTGTGGAGCACGGTATCCTCTGCCGAAACAGAGGTTGGACAAGACCGGAGGGGTCTCCTAGTTCCA  
+

FFFFFFFFFFFFFFFF:FFFFFFFFFFFFFFFFFFFFFFFFFFFFFFFFFFFFFFFFFFFFFFFF  
FFFFFFFFFFFFFFFFFFFFFFFFFFFFFFFFFFFFFFFFFFFFFFFFFFFFFFFFFFFFFFFF  
@A00155:342:HHGFNDSXY:1:2160:23927:12367 1:N:0:GAACCTAG+TCCGCATA  
GTCATCTCAATGCCGAGAGGGATGTGGAGGGCGAGAGAGAGCGACTTCTCTCGGGCCCACAGCCTTAC  
AGCTGTGGAGCACGGTATCCTCTGCCGAAACAGAGGTTGGACAAGACCGGAGGGGTCTCCTAGTTCCA  
+  
FFFFFFFFFFFFFFFF,FFFFFFFFFFFFFFFFFFFFFFFFFFFFFFFFFFFFFFFFFFFFFFFF  
FFFFFFFFFFFFFFFFFFFFFFFF:FFFFFFFFFFFFFFFFFFFFFFFFFFFFFFFFFFFFFFFF,F  
@A00155:342:HHGFNDSXY:1:2160:26666:18490 1:N:0:GAACCTAG+TCCGCATA  
CATCTCAATGCCGAGAGGGATGTGGAGGGCGAGAGAGAGCGACTTCTCTCGGGCCCACAGCCTTACAG  
CTGTGGAGCACGGTATCCTCTGCCGAAACAGAGGTTGGACAAGACCGGAGGGGTCTCCTAGTTCCAAA  
+  
FFFFFFFFFFFFFFFFFFFFFFFFFFFFFFFFFFFFFFFFFFFFFFFFFFFFFFFFFFFFFFFF  
FFFFFFFFFFFFFFFFFFFFFFFFFFFFFFFFFFFFFFFFFFFFFFFFFFFFFFFFFFFFFFFF  
@A00155:342:HHGFNDSXY:1:2160:23149:20854 1:N:0:GAACCTAG+TCCGCATA  
TTAGATCAGCTGTGTCCACTTAAGGACTCACCTCTGGCCTATGGTCATCTCAATGCCGAGAGGGATGT  
GGAGGGCGAGAGAGAGCGACTTCTCTCGGGCCCACAGCCTTACAGCTGTGGAGCACGGTATCCTCTGC  
+  
FFFFFFFFFFFFFFFFFFFFFFFFFFFFFFFFFFFFFFFFFFFFFFFFFFFFFFFFFFFFFFFF,FFF  
FFFFFFFFFFFFFFFFFFFFFFFFFFFFFFFFFFFFFFFFFFFFFFFFFFFFFFFFFFFFFFFF  
@A00155:342:HHGFNDSXY:1:2161:31051:3881 1:N:0:GAACCTAG+TCCGCATA  
TCCTCTGCCGAAACAGAGGTTGGACAAGACCGGAGGGGTCTCCTGGTTCCAAAGGAGATGTACTCCGG  
GCTTGTTACGACCTACCGTGTAAGTCGTAGTCTAGTAGGCTACCTGACGAGTCCTTTTAGGACGAA  
+  
FFFFFFFFFFFFFFFFFFFFFFFFFFFFFFFFFFFFFFFFFFFFFFFFFFFFFFFFFFFFFFFF  
FFFFFFFFFFFFFFFFFFFFFFFFFFFFFFFFFFFFFFFFFFFFFFFFFFFFFFFFFFFFFFFF  
@A00155:342:HHGFNDSXY:1:2161:22516:10488 1:N:0:GAACCTAG+TCCGCATA  
CTTCTCTCGGGCCCACAGCCTTACAGCTGTGGAGCACGGTATCCTCTGCCGAAACAGAGGTTGGACAA  
GACCGGAGGGGTCTCCTGGTTCCAAAGGAGATGTACTCCGGGCTTGTTACGACCTACCGTGTAAGTC  
+  
FFFFFFFFFFFFFFFFFFFFFFFFFFFFFFFFFFFFFFFFFFFFFFFFFFFFFFFFFFFFFFFF  
FFFFFFFFFFFFFFFFFFFFFFFFFFFFFFFFFFFFFFFFFFFFFFFFFFFFFFFFFFFFFFFF  
@A00155:342:HHGFNDSXY:1:2161:24677:26099 1:N:0:GAACCTAG+TCCGCATA  
GGATGTGGAGGGCGAGAGAGAGCGACTTCTCTCGGGCCCACAGCCTTACAAGTGTGGAGCACGGTATC  
CTCTGCCGAAACAGAGGTTGGACAAGACCGGAGGGGTCTCCTAGTTCCAAAGGAGATGTACTCC  
+  
FFFFFFFFFFFFFFFFFFFFFFFFFFFFFFFFFFFFFFFFFFFFFFFFFFFFFFFFFFFFFFFF  
FFFFFFFFFFFFFFFFFFFFFFFFFFFFFFFFFFFFFFFFFFFFFFFFFFFFFFFFFFFFFFFF  
@A00155:342:HHGFNDSXY:1:2161:14913:28260 1:N:0:GAACCTAG+TCCGCATA  
CCTCTGTTTCGGCAGAGGATACCGTGCTCCACAGCTGTAAGGCTGTGGGCCCGAGAGAAGTCGCTCTC  
TCTCGCCCTCTACATCCCTCTCGGCATTGAGATGACCATAGGCCAGAGGTGAGTCCTTAAGTGGACAC  
+  
FFFFFFFFFFFFFFFFFFFFFFFFFFFFFFFFFFFFFFFFFFFFFFFFFFFFFFFFFFFFFFFF  
FFFFFFFFFFFFFFFFFFFFFFFFFFFFFFFFFFFFFFFFFFFFFFFFFFFFFFFFFFFFFFFF  
@A00155:342:HHGFNDSXY:1:2161:20193:30044 1:N:0:GAACCTAG+TCCGCATA  
CGAGAGAGAGCGACTTCTCTCGGGCCCACAGCCTTACAGCTGTGGAGCACGGTATCCTCTGCCGAAAC  
AGAGGTTGGACAAGACCGGAGGGGTCTCCTAGTTCCAAAGGAGATGTACTCCGGGCTTGTTACGACC  
+  
FFFFFFFFFFFFFFFFFFFFFFFFFFFFFFFFFFFFFFFFFFFFFFFFFFFFFFFFFFFFFFFF  
FFFFFFFFFFFFFFFFFFFFFFFFFFFFFFFFFFFFFFFFFFFFFFFFFFFFFFFFFFFFFFFF:FFFFFFFFFFFFFFFFFFFFFFFFFFFFFFFF:FFFF  
@A00155:342:HHGFNDSXY:1:2162:4924:9893 1:N:0:GAACCTAG+TCCGCATA  
TATCCTCTGCCGAAACAGAGGTTGGACAAGACCGGAGGGGTCTCCTAGTTCCAAAGGAGATGTACTCC  
GGGCTTGTTACGACCTACCGTGTAAGTCGTAGTCTAGTAGGCTACCTGACGAGTCCTTTTAGGACG  
+

[illegible]

```

FFFFFFFFFFFFFFFFFFFFFFFFFFFFFFFFFFFFFFFFFFFFFFFFFFFFFFFFFFFFFFFFFFFFF:FFFFFFFFFFFFFFFFFFFFFFFFFFFFFFFFFFFFF
FFFFFFFFFFFFFFFFFFFFFFFFFFFFFFFFFFFFFFFFFFFFFFFFFFFFFFFFFFFFFFFFFFFFFFFFFFFFFFFFFFFFFFFFFFFFFFFFFFFFFFFFFFFFF
@A00155:342:HHGFNDSXY:1:2168:8486:1251 1:N:0:GAACCTAG+TCCGCATA
ATCCTCTGCCGAAACAGAGGTTGGACAAGACCGGAGGGGTCTCCTATTTCAAAGGAGATGTACTCCG
GGCTTGTTACGACCTACCGTGTAAGTCGTAGTCTAGTAGGCTACCTGACGAGTCCTTTTTAGGACGA
+
F:F::FFFFFFFFFFFFFF:FFFFFFFFFFFFFFF,:F:FF,F,FFF,F,FFF:FFFF,F,F,:,FF,F:,
,,,F:F:FFFF:FFFFFFF,:FFFF:, ,F:F:FFFFFFFFFFFFFF,,FF:F:FFFF,F,FFF,F,FFFF
@A00155:342:HHGFNDSXY:1:2168:19732:35540 1:N:0:GAACCTAG+TCCGCATA
AGAGAGAGCGACTTCTCTCGGGCCCACAGCCTTACAGCTGTGGAGCACGGTATCCTCTGCCGAAACAG
AGGTTGGACAAGACCGGAGGGGTCTCCTAGTTCAAAGGAGATGTACTCCGGGCTTGTTTC
+
FFFFFFFFFFFFFFFFFFFFFFFFFFFFFFFFFFFFFFFFFFFFFFFFFFFFFFFFFFFFFFFFFFFFF:FFFFFFFFFFFFFFFFFFFFFFFFFFFFFFFFFFFFF
FFFFFFFFFFFFFFF:FFFFFFFFFFFFFFFFFFFFFFF:FFFFFFFFFFFFFFFFFFFFFFFFFFFFFFFFFFFFF,FFFF
@A00155:342:HHGFNDSXY:1:2169:21314:11600 1:N:0:GAACCTAG+TCCGCATA
CACATCCCTCTCGGCATTGAGATGACCATAGGCCAGAGGTGAGTCCTTAAGTGGACACAGCTGATCTA
AGGCGGTGTGGCGGGGCATGGGTTTGAACCCCCATGACGGTCGGAGTCTAGTAGGCTCCCTGATGAGT
+
FFFFFFFFFFFFF:FFFFFFFFFFFFFFFFFFFFFFFFFFFFFFFFFFFFFFFFFFFFFFFFFFFFFFFFFFFFF
FFFFFFFFFFFFF:FFFFFFFFFFFFFFFFFFFFFFF:FFFFFFFFFFFFFFFFFFFFFFFFFFFFFFFFFFFFF,FFFFF:FFFFFFFFFFFFFFFFFFFFF
@A00155:342:HHGFNDSXY:1:2169:4716:24001 1:N:0:GAACCTAG+TCCGCATA
AGCGACTTCTCTCGGGCCCACAGCCTTACAGCTGTGGAGCACGGTATCCTCTGCCGAAACAGAGGTTG
GACAAGACCGGAGGGGTCTCCTAGTTCAAAGGAGATGTACTCCGGGCTTGTTACGACCTACCGTGT
+
FFFFFFFFFFFFFFFFFFFFFFFFFFFFFFFFFFFFFFFFFFFFFFFFFFFFFFFFFFFFFFFFFFFFF:FFFFFFFFFFFFFFFFFFFFFFFFFFFFFFFFFFFFF
FFFFFFFFFFFFFFFFFFFFFFFFFFFFFFFFFFFFF:FFFFFFF:FFFFFFFFFFFFFFFFFFFFFFFFFFFFFFFFFFFFF,FFFFFFF
@A00155:342:HHGFNDSXY:1:2169:1145:28557 1:N:0:GAACCTAG+TCCGCATA
ACTTCTCTCGGGCCCACAGCCTTACAGCTGTGGAGCACGGTATCCTCTGCCGAAACAGAGGTTGGACA
AGACCGGAGGGGTCTCCTGGTTCAAAGGAGATGTACTCCGGGCTTGTTACGACCTACCGTGTAAGT
+
:FFFFFFFFFFFFFFFFFFFFFFFFFFFFFFFFFFFFFFFFFFFFFFFFFFFFFFFFFFFFFFFFFFFFF,FFFFFFFFFFFFF:FFFFFFFFFFFFFFFFFFFFF
FF,FFFFFFFFFFFFFFFFFFFFFFFFFFFFFFFFFFFFF,: :FFFFFFFFFFFFF:FF:FFF:FFFF:FFF:FFFFFFFFFFFFFFFFFFFFF
@A00155:342:HHGFNDSXY:1:2169:3224:31908 1:N:0:GAACCTAG+TCCGCATA
ATGCCGAGAGGGATGTGGAGGGCGAGAGAGAGCGACTTCTCTCGGGCCCACAGCCTTACAGCTGTGGA
GCACGGTATCCTCTGCCGAAACAGAGGTTGGACAAGACCGGAGGGGTCTCCTAGTTCAAAGGAG
+
FFFFFFFFFFFFF:F:FFFFFFFFFFFFF:FFFFFFFFFFFFFFFFFFFFFFFFFFFFFFFFFFFFFFFFFFFFF:FFFFFFFFFFFFFFFFFFFFFFFFFFFFF
FFFFFFFFFFFFFFFFFFFFFFFFFFFFFFFFFFFFF,FFFFFFFFFFFFFFFFFFFFFFFFFFFFFFFFFFFFF:FFFFFFFFFFFFFFFFFFFFF
@A00155:342:HHGFNDSXY:1:2169:26946:34914 1:N:0:GAACCTAG+TCCGCATA
ATCTCAATGCCGAGAGGGATGTAGAGGGCGAGAGAGAGCGACTTCTCTCGGGCCCACAGCCTTACAGC
TGTGGAGCACGGTATCCTCTGCCGAAACAGAGGTTGGACAAGACCGGAGGGGTCTCCTAGTTCAAAG
+
FFFFFFFFFFFFFFFFFFFFFFFFFFFFFFFFFFFFFFFFFFFFFFFFFFFFFFFFFFFFFFFFFFFFF:FFFFFFFFFFFFFFFFFFFFFFFFFFFFFFFFFFFFF
FFFFFFFFFFFFFFFFFFFFFFFFFFFFFFFFFFFFF:FFFFFFFFFFFFFFFFFFFFFFFFFFFFFFFFFFFFF:FFFFFFFFFFFFFFFFFFFFF
@A00155:342:HHGFNDSXY:1:2169:25907:36996 1:N:0:GAACCTAG+TCCGCATA
TTCTCTCGGGCCCACAGCCTTACAGCTGTGGAGCACGGTATCCTCTGCCGAAACAGAGGTTGGACAAG
ACCGGAGGGGTCTCCTAGTTCAAAGGAGATGTACTCCGGGCTTGTTACGACCTACCGTGTAAAGTCG
+
FFFFFFFFFFFFF:FFFFFFFFFFFFF:FFFFFFFFFFFFFFFFFFFFFFFFFFFFFFFFFFFFF:FFFFFFFFFFFFFFFFFFFFFFFFFFFFFFFFFFFFF
FFFFFFFFFFFFFFFFFFFFFFFFFFFFFFFFFFFFF:FFFFFFFFFFFFFFFFFFFFFFFFFFFFFFFFFFFFF:FFFFFFFFFFFFFFFFFFFFF
@A00155:342:HHGFNDSXY:1:2170:25717:1282 1:N:0:GAACCTAG+TCCGCATA
TTCTCTCGGGCCCACAGCCTTACAGCTGTGGAGCACGGTATCCTCTGCCGAAACAGAGGTTGGACAAG
ACCGGAGGGGTCTCCTAGTTCAAAGGAGATGTACTCCGGGCTTGTTACGACCTACCGTGTAAAGTCG
+

```

FFFFFFFFFFFFFFFFFFFFFFFFFFFFFFFFFFFFFFFFFFFFFFFFFFFFFFFFFFFFFFFFFFFFFFFF  
FFFFFFFFFFFFFFFFFFFFFFFFFFFFFFFFFFFFFFFFFFFFFFFFFFFFFFFFFFFFFFFFFFFFFFFF:FFFFFFFFFFFFFFFFFFFFF  
@A00155:342:HHGFNDSXY:1:2170:28402:6715 1:N:0:GAACCTAG+TCCGCATA  
TGCCGAGAGGGATGTAGAGGGCGAGAGAGAGCGACTTCTCTCGGGCCCACAGCCTTACAGCTGTGGAG  
CACGGTATCCTCTGCCGAAACAGAGGTTGGACAAGACCGGAGGGGTCTCCTAGTTCCAAAGGAG  
+  
FFFFF:FFFFFFFF:FFFFFFFFFFFFFFFFFFFFFFFFFFFFFFFFFFFFFFFFFFFFFFFFFFFFFFFF  
FFFFFFFFFFFFFFFFFFFFFFFFFFFFFFFFFFFFFFFFFFFFFFFFFFFFFFFFFFFFFFFFFFFFFFFF:FFFFF  
@A00155:342:HHGFNDSXY:1:2170:2998:8750 1:N:0:GAACCTAG+TCCGCATA  
TTACAGCTGTGGAGCACGGTATCCTCTGCCGAAACAGAGGTTGGACAAGACCGGAGGGGTCTCCTGGT  
TCCAAAGGAGATGTACTCCGGGCTTGTTACGACCTACCGTGTAAGTCGTAGTCTAGTAGGCTACCTG  
+  
FFFFFFFFFFFFFFFFFFFFFFFFFFFFFFFFFFFFFFFFFFFFFFFFFFFFFFFFFFFFFFFFFFFFFFFF  
FFFFFFFFFFFFFFFFFFFFFFFFFFFFFFFFFFFFFFFFFFFFFFFFFFFFFFFFFFFFFFFFFFFFFFFF  
@A00155:342:HHGFNDSXY:1:2170:3242:9361 1:N:0:GAACCTAG+TCCGCATA  
TTACAGCTGTGGAGCACGGTATCCTCTGCCGAAACAGAGGTTGGACAAGACCGGAGGGGTCTCCTGGT  
TCCAAAGGAGATGTACTCCGGGCTTGTTACGACCTACCGTGTAAGTCGTAGTCTAGTAGGCTACCTG  
+  
FFFFFFFFFFFF:FFFFFFFFFFFFFFFFFFFFFFFFFFFFFFFFFFFFFFFFFFFFFFFFFFFFFFFFFFFF  
FFFFFFFFFFFFFFFFFFFFFFFFFFFFFFFFFFFFFFFFFFFFFFFFFFFFFFFFFFFFFFFFFFFFFFFF:FFFF:FF  
@A00155:342:HHGFNDSXY:1:2170:32696:11710 1:N:0:GAACCTAG+TCCGCATA  
ATGGGGGTTCAAACCCATGCCCGCCACACCGCCTTAGATCAGCTGTGTCCACTTAAGGACTCACCTC  
TGGCCTATGGTCATCTCAATGCCGAGAGGGATGTGGAGGGCGAGAGAGAGCGACTTCTCT  
+  
FFFFFFFFFFFFFFFFFFFFFFFFFFFFFFFFFFFFFFFFFFFFFFFFFFFFFFFFFFFFFFFFFFFFFFFF  
FFFFFFFFFFFFFFFFFFFFFFFFFFFFFFFFFFFFFFFFFFFFFFFFFFFFFFFFFFFFFFFFFFFFFFFF  
@A00155:342:HHGFNDSXY:1:2170:6705:24377 1:N:0:GAACCTAG+TCCGCATA  
ATGCCGAGAGGGATGTGGAGGGCGAGAGAGAGCGACTTCTCTCGGGCCCACAGCCTTACAGCTGTGGA  
GCACGGTATCCTCTGCCGAAACAGAGGTTGGACAAGACCGGAGGGGTCTCCTAGTTCCAAAGGAGATG  
+  
FFFFFFFFFFFFFFF:FFFFFFFFFFFFFFFFFFFFFFFFFFFFFFFFFFFFFFFFFFFFFFFFFFFFFFFF  
FFFFFFFFFFFFFFF:FFFFFFFFF:FFFFFFFFFFFFFFFFFFFFFFFFFFFFFFFFFFFFFFFFFFFFFFF  
@A00155:342:HHGFNDSXY:1:2170:16378:28134 1:N:0:GAACCTAG+TCCGCATA  
TTCTCTCGGGCCCACAGCCTTACAGCTGTGGAGCACGGTATCCTCTGCCGAAACAGAGGTTGGACAAG  
ACCGGAGGGGTCTCCTAGTTCCAAAGGAGATGTACTCCGGGCTTGTTACGACCTACCGTGTAAGTCG  
+  
FFFFFFFFFFFFFFFFFFFFFFFFFFFFFFFFFFFFFFFFFFFFFFFFFFFFFFFFFFFFFFFFFFFFFFFF  
FFFFFFFFFFFFFFFFFFFFFFFFFFFFFFFFFFFFFFFFFFFFFFFFFFFFFFFFFFFFFFFFFFFFFFFF  
@A00155:342:HHGFNDSXY:1:2170:14064:29857 1:N:0:GAACCTAG+TCCGCATA  
GAGAGGGATGTGGAGGGCGAGAGAGAGCGACTTCTCTCGGGCCCACAGCCTTACAGCTGTGGAGCACG  
GTATCCTCTGCCGAAACAGAGGTTGGACAAGACCGGAGGGGTCTCCTAGTTCCAAAGGAGATGTACT  
+  
FFF:FFFFFFFFFFFFFFFFFFFFFFFFFFFFFFFFFFFFFFFFFFFFFFFFFFFFFFFFFFFFFFFFFFFF  
FFFFFFFFFFFFFFFFFFFFFFFFFFFFFFFFFFFFFFFFFFFFFFFFFFFFFFFFFFFFFFFFFFFFFFFF  
@A00155:342:HHGFNDSXY:1:2171:10728:7044 1:N:0:GAACCTAG+TCCGCATA  
AATGCCGAGAGGGATGTGGAGGGCGAGAGAGAGCGACTTCTCTCGGGCCCACAGCCTTACAGCTGTGG  
AGCACGGTATCCTCTGCCGAAACAGAGGTTGGACAAGACCGGAGGGGTCTCCTAGTTCCAAAGGAGAT  
+  
FFFFFFFFFFFFFFFFFFFFFFFFFFFFFFFFFFFFFFFFFFFFFFFFFFFFFFFFFFFFFFFFFFFFFFFF  
FFFFFFFFFFFFFFFFFFFFFFFFFFFFFFFFFFFFFFFFFFFFFFFFFFFFFFFFFFFFFFFFFFFFFFFF  
@A00155:342:HHGFNDSXY:1:2171:15826:18474 1:N:0:GAACCTAG+TCCGCATA  
AAGGACTCACCTCTGGCCTATGGTCATCTCAATGCCGAGAGGGATGTAGAGGGCGAGAGAGAGCGACT  
TCTCTCGGGCCCACAGCCTTACAGCTGTGGAGCACGGTATCCTCTGCCGAAACAGAGGTTGGACAAGA  
+

FFFFFFFFFFFFFFFFFFFFFFFFFFFFFFFFFFFFFFFFFFFFFFFFFFFFFFFFFFFFFFFFFFFFFFFF  
FFFFFFFFFFFFFFFFFFFFFFFFFFFFFFFFFFFFFFFFFFFFFFFFFFFFFFFFFFFFFFFFFFFFFFFF  
@A00155:342:HHGFNDSXY:1:2171:27190:21684 1:N:0:GAACCTAG+TCCGCATA  
TGTCCACTTAAGGACTCTCCTCTGGCCTATGGTCATCTCAATGCCGAGAGGGATGTGGAGGGCGAGAG  
AGAGCGACTTCTCTCGGGCCACAGCCTTACAGCTGTGGAGCACGGTATCCTCTGCCGAAACAGAGGT  
+  
FFFFFFFFFFFF:FFFFFF:FFFFFFFFFFFFFFFFFFFFFFFFFFFFFFFFFFFFFFFFFFFFFFFF,FFFFFFFFFFFFFFFF  
FFFFFFFFFFFFFFFF:F:FFFFFF:FFFFFFFFFFFFFFFFFFFFFFFFFFFFFFFFFFFFFFFFFFFFFFFF:FFFFFFFF  
@A00155:342:HHGFNDSXY:1:2172:30897:11882 1:N:0:GAACCTAG+TCCGCATA  
GAGAGGGATGTGGAGGGCGAGAGAGAGCGACTTCTCTCGGGCCACAGCCTTACAGCTGTGGAGCACG  
GTATCCTCTGCCGAAACAGAGGTTGGACAAGACCGGAGGGGTCTCCTGGTTCCAAAGGAGATGTACTC  
+  
FFFFFFFFFFFFFFFFFFFFFFFFFFFFFFFFFFFFFFFFFFFFFFFFFFFFFFFFFFFFFFFFFFFFFFFF  
FFFFFFFFFFFFFFFFFFFFFFFFFFFFFFFFFFFFFFFFFFFFFFFFFFFFFFFFFFFFFFFFFFFFFFFF:FFFFFFFFFFFFFFFF  
@A00155:342:HHGFNDSXY:1:2172:29143:27383 1:N:0:GAACCTAG+TCCGCATA  
GGGCGAGAGAGAGCGACTTCTCTCGGGCCACAGCCTTACAGCTGTGGAGCACGGTATCCTCTGCCGA  
AACAGAGGTTGGACAAGACCGGAGGGGTCTCCTAGTTCCAAAGGAGATGTACTCCGGGC  
+  
FFFFFFFFF,FFFFFFFF,FFFFF,F,FF,FFFFFF:FFFFFF,FFFFF,FF,FFFFFFFF,F:F:F:,FF  
FF:FFFF,,FFF:FF,FFFFFFFF:FFFFFFFFFFFFFFFF:FFFFFF:F,FFFF,:F:::  
@A00155:342:HHGFNDSXY:1:2172:13910:33223 1:N:0:GAACCTAG+TCCGCATA  
CTTCTCTCGGGCCACAGCCTTACAGCTGTGGAGCACGGTATCCTCTGCCGAAACAGAGGTTGGACAA  
GACCGGAGGGGTCTCCTAGTTCCAAAGGAGATGTACTCCGGGCTTGTTACGACCTACC  
+  
FFFFFFFFFFFFFFFFFFFFFFFFFFFFFFFFFFFFFFFFFFFFFFFFFFFFFFFFFFFFFFFFFFFFFFFF  
FFFFFFFFFFFFFFFFFFFFFFFFFFFFFFFFFFFFFFFFFFFFFFFFFFFFFFFFFFFFFFFFFFFFFFFF  
@A00155:342:HHGFNDSXY:1:2172:13566:33285 1:N:0:GAACCTAG+TCCGCATA  
CTTCTCTCGGGCCACAGCCTTACAGCTGTGGAGCACGGTATCCTCTGCCGAAACAGAGGTTGGACAA  
GACCGGAGGGGTCTCCTAGTTCCAAAGGAGATGTACTCCGGGCTTGTTACGACCTACC  
+  
FFFFFFFFFFFFFFFFFFFFFFFFFFFFFFFFFFFFFFFFFFFFFFFFFFFFFFFFFFFFFFFFFFFFFFFF  
FFFFFFFFFFFFFFFFFFFFFFFFFFFFFFFFFFFFFFFFFFFFFFFFFFFFFFFFFFFFFFFFFFFFFFFF  
@A00155:342:HHGFNDSXY:1:2173:15600:1579 1:N:0:GAACCTAG+TCCGCATA  
CTTCTCTCGGGCCACAGCCTTACAAGTGTGGAGCACGGTATCCTCTGCCGAAACAGAGGTTGGACAA  
GACCGGAGGGGTCTCCTAGTTCCAAAGGAGATGTACTCCGGGCTTGTTACGACCTACCGTGTAAGTC  
+  
FFFFFFFFFFFFFFFFFFFFFFFFFFFFFFFFFFFFFFFFFFFFFFFFFFFFFFFFFFFFFFFFFFFFFFFF  
FFFFFFFFFFFFFFFFFFFFFFFFFFFFFFFFFFFFFFFFFFFFFFFFFFFFFFFFFFFFFFFFFFFFFFFF:FF  
@A00155:342:HHGFNDSXY:1:2173:12608:9549 1:N:0:GAACCTAG+TCCGCATA  
GGATACCGTGCTCCACAGCTGTAAGGCTGTGGGCCGAGAGAAGTCGCTCTCTCTCGCCCTCCACATC  
CCTCTCGGCATTGAGATGACCATAGGCCAGAGGTGAGTCCTTAAGTGGACACAGCTGATCTAAGGCGG  
+  
FFFFFFFFFFFFFFFFFFFFFFFFFFFFFFFFFFFFFFFFFFFFFFFFFFFFFFFFFFFFFFFFFFFFFFFF  
FFFFFFFFFFFFFFFFFFFFFFFFFFFFFFFFFFFFFFFFFFFFFFFFFFFFFFFFFFFFFFFFFFFFFFFF  
@A00155:342:HHGFNDSXY:1:2173:25473:12508 1:N:0:GAACCTAG+TCCGCATA  
ACCTCTGTTTCGGCAGAGGATACCGTGCTCCACAGCTGTAAGGCTGTGGGCCGAGAGAAGTCGCTCT  
CTCTCGCCCTCCACATCCCTCTCGGCATTGAGATGACCATAGGCCAGAGGAGAGTCCTTAAGTGGACA  
+  
FFFFFFFFFFFFFFFFFFFFFFFFFFFFFFFFFFFFFFFFFFFFFFFFFFFFFFFFFFFFFFFFFFFFFFFF:FF  
FFFFFFFFFFFFFFFFFFFFFFFFFFFFFFFFFFFFFFFFFFFFFFFFFFFFFFFFFFFFFFFFFFFFFFFF  
@A00155:342:HHGFNDSXY:1:2173:8305:17315 1:N:0:GAACCTAG+TCCGCATA  
GGGCGAGAGAGAGCGACTTCTCTCGGGCCACAGCCTTACAGCTGTGGAGCACGGTATCCTCTGCCGA  
AACAGAGGTTGGACAAGACCGGAGGGGTCTCCTAGTTCCAAAGGAGATGTACTCCGGGCTTGTTACG  
+

```

FFFFFFFFFFFFFFFFFFFFFFFFFFFFFFFFFFFFFFFFFFFFFFFFFFFFFFFFFFFFFFFFFFFFF:FFFFFFFFFF:FFFFFFFFFF:
FFFFFFFFFFFFFFFFFFFFFFFFFFFFFFFFFFFFFFFFFFFFFFFFFFFFFFFFFFFFFFFFFFFFFFF:FF
@A00155:342:HHGFNDSXY:1:2173:5791:26866 1:N:0:GAACCTAG+TCCGCATA
GGATGTGGAGGCGAGAGAGAGCGACTTCTCTCGGGCCCACAGCCTTACAGCTGTGGAGCACGGTATC
CTCTGCCGAAACAGAGGTTGGACAAGACCGGAGGGGTCTCCTAGTTCCAAAGGAGATGTACTCC
+
FFFFFFFFFFFFFFFFFFFFFFFFFFFFFFFFFFFFFFFFFFFFFFFFFFFFFFFFFFFFFFFFFFFFFFF
FFFFFFFFFFFFFF:F,FFFFFFFF:FFFFFFFFFFFFFFFFFFFFFFFFFFFFFFFFFFFFFFFFFFFFF
@A00155:342:HHGFNDSXY:1:2173:22435:28416 1:N:0:GAACCTAG+TCCGCATA
GTATCCTCTGCCGAAACAGAGGTTGGACAAGACCGGAGGGGTCTCCTAGTTCCAAAGGAGATGTACTC
CGGGCTTGTTTCACGACCTACCGTGTAAGTCGTAGTCTAGTAGGCTACCTGACGAGTCCTT
+
FFFFFFFFFFFFFFFFFFFFFFFFFFFFFFFFFFFFFFFFFFFFFFFFFFFFFFFFFFFFFFFFFFFFFFF:F
FFFFFFFFFFFFFFFFFFFFFFFFFFFFFFFFFFFFFFFFFFFFFFFFFFFFFFFFFFFFFFFFFFFFFFF
@A00155:342:HHGFNDSXY:1:2174:5575:1188 1:N:0:GAACCTAG+TCCGCATA
TTACAGCTGTGGAGCACGGTATCCTCTGCCGAAACAGAGGTTGGACAAGACCGGAGGGGTCTCCTAGT
TCCAAAGGAGATGTACTCCGGGCTTGTTTCACGACCTACCGTGTAAGTCGTAGTCTAGTAGGCTACCTG
+
FFFFFFFFF:FFFFFFFFFFFFFFFFFFFFFFFFFFFFFFFFFFFFFFFFFFFFFFFFFFFFFFFFFFFFF,FFFFFFFFFFFFFFFFFFFFF
FFFFFFFFFFFFFFFFFFFFFFFFFFFFFFFFFFFFFFFFFFFFFFFFFFFFFFFFFFFFF,FFF:FFFFFFFFFFFFFFFFFFFFFFFFFFFFF
@A00155:342:HHGFNDSXY:1:2175:6244:9831 1:N:0:GAACCTAG+TCCGCATA
ATCTCTATGCCGAGAGGGATGTGGAGGGCGAGAGAGAGCGACTTCTCTCGGGCCCACAGCCTTACAGC
TGTGGAGCACGGTATCCTCTGCCGAAACAGAGGTTGGACAAGACCGGAGGGGTCTCCTAGTTCCAAAG
+
FFFFFFFFFFFFFFF:FFFFFFFFF:FFFFFFFFFFFFFFFFFFFFFFFFFFFFF:FFFFFFFFFFFFFFF:FFFFFFFFFFFFFFF
FFFFFFFFFFFFFFFFFFFFFFFFFFFFFFFFFFFFF:FFFFFFFFFFFFFFFFFFFFFFFFFFFFFFFFFFFFFFFFFFFFFFFFFFFFF
@A00155:342:HHGFNDSXY:1:2175:10800:11428 1:N:0:GAACCTAG+TCCGCATA
AAGGACTCACCTCTGGCCTATGGTCATCTCAATGCCGAGAGGGATGTGGAGGGCGAGAGAGAGCGACT
TCTCTCGGGCCCACAGCCTTACAGCTGTGGAGCACGGTATCCTCTGCCGAAACAGAGGTTGGACAAGA
+
FFFFFFFFFFFFFFFFFFFFFFFFFFFFFFFFFFFFFFFFFFFFFFFFFFFFFFFFFFFFFFFFFFFFFFF
FFFFFFFFFFFFFFFFFFFFFFFFFFFFFFFFFFFFFFFFFFFFFFFFFFFFFFFFFFFFFFFFFFFFFFF
@A00155:342:HHGFNDSXY:1:2175:9372:20071 1:N:0:GAACCTAG+TCCGCATA
GTATCCTCTGCCGAAACAGAGGTTGGACAAGACCGGAGGGGTCTCCTAGTTCCAAAGGAGATGTACTC
CGGGCTTGTTTCACGACCTACCGTGTAAGTCGTAGTCTAGTAGGCTACCTGACGAGTCCTTTTTAGGAC
+
FFFFFFFFFFFFFFFFFFFFFFFFFFFFFFFFFFFFFFFFFFFFFFFFFFFFFFFFFFFFFFFFFFFFFFF
FFFFFFFFFFFFFFFFFFFFFFFFFFFFFFFFFFFFFFFFFFFFFFFFFFFFFFFFFFFFFFFFFFFFFFF
@A00155:342:HHGFNDSXY:1:2175:19090:21214 1:N:0:GAACCTAG+TCCGCATA
TGTGGAGGGCGAGAGAGAGCGACTTCTCTCGGGCCCACAGCCTTACAGCTGTGGAGCACGGTATCCTC
TGCCGAAACAGAGGTTGGACAAGACCGGAGGGGTCTCCTAGTTCCAAAGGAGATGTACTCCGGG
+
F:FFFFFFFFFFFFF:FFFFFFFFFFFFFFFFFFFF,F:FFFFFFF:FFFFFFFFFFFF:F,FF:FFFFFFFFFFFFFFF
F:FFFFFFFFFFFF::FFFFFFFFFFFF,FFF:FFFFFFFF:FFFFFFF:FFFFFFFFFFFFFFFFFFFFF:FFFF
@A00155:342:HHGFNDSXY:1:2175:22182:25097 1:N:0:GAACCTAG+TCCGCATA
GAGAGGGATGTGGAGGGCGAGAGAGAGCGACTTCTCTCGGGCCCACAGCCTTACAGCTGTGGAGCACG
GTATCCTCTGCCGAAACAGAGGTTGGACAAGACCGGAGGGGTCTCCTAGTTCCAAAGGAGATGTACTC
+
FFFFFFFFFFFFFFFFFFFFFFFFFFFFFFFFFFFFFFFFFFFFFFFFFFFFFFFFFFFFFFFFFFFFFFF
FFFFFFFFFFFFFFFFFFFFFFFFFFFFFFFFFFFFF:FFFFFFFFFFFFFFFFFFFFF:FFFFFFFFFFFFFFFFFFFFF
@A00155:342:HHGFNDSXY:1:2175:30581:29966 1:N:0:GAACCTAG+TCCGCATA
CTCTGGCCTATGGTCATCTCAATGCCGAGAGGGATGTGGAGGGCGAGAGAGAGCGACTTCTCTCGGGC
CCACAGCCTTACAGCTGTGGAGCACGGTATCCTCTGCCGAAACAGAGGTTGGACAAGACCGGAGGGGT
+

```

```

FFFFFFFFFFFFFFFFFFFFFFFFFFFFFFFFFFFFFFFFFFFFFFFFFFFFFFFFFFFFFFFFFFFFF:FFF:FFFFFFFFFFFFFFFFFFFF
FFFFFFFFFFFFFFFFFFFFFFFFFFFFFFFFFFFFFFFFFFFFFFFFFFFFFFFFFFFFFFFFFFFFF
@A00155:342:HHGFNDSXY:1:2175:25482:33473 1:N:0:GAACCTAG+TCCGCATA
CCTCTGCCGAAACAGAGGTTGGACAAGACCGGAGGGGTCTCCTAGTTCCAAAGGAGATGTACTCCGGG
CTTGTTACACGACCTACCGTGTAAGTCGTAGTCTAGTAGGCTACCTGACGAGTCCTTTTTAGGACGAAA
+
FFFFFFFFFFFFFFFFFFFFFFFFFFFFFFFFFFFFFFFFFFFFFFFFFFFFFFFFFFFFFFFFFFFFF
FFFFFFFFFFFFFFFFFFFFFFFFFFFFFFFFFFFFFFFFFFFFFFFFFFFFFFFFFFFFFFFFFFFFF
@A00155:342:HHGFNDSXY:1:2176:16803:16501 1:N:0:GAACCTAG+TCCGCATA
AATGCCGAGAGGGATGTGGAGGGCGAGAGAGAGCGACTTCTCTCGGGCCCACAGCCTTACAGCTGTGG
AGCACGGTATCCTCTGCCGAAACAGAGGTTGGACAAGACCGGAGGGGTCTCCTAGTTCCAAAGGAGAT
+
FFFFFFFFFFFFFFFFFFFFFFFFFFFFFFFFFFFFFFFFFFFFFFFFFFFFFFFFFFFFFFFFFFFFF
FFFFFFFFFFFFFFFFFFFFFFFFFFFFFFFFFFFFFFFFFFFFFFFFFFFFFFFFFFFFFFFFFFFFF
@A00155:342:HHGFNDSXY:1:2176:16957:16517 1:N:0:GAACCTAG+TCCGCATA
AATGCCGAGAGGGATGTGGAGGGCGAGAGAGAGCGACTTCTCTCGGGCCCACAGCCTTACAGCTGTGG
AGCACGGTATCCTCTGCCGAAACAGAGGTTGGACAAGACCGGAGGGGTCTCCTAGTTCCAAAGGAGAT
+
FFFFFFF:FFFFFFFFFFFFFFFFFFFFFFFFFFFFFFFFFFFFFFFFFFFFFFFFFFFFFFFFFFFFF
FFFFFFFFFFFFFFFFFFFFFFFFFFFFFFFFFFFFFFFFFFFFFFFFFFFFFFFFFFFFFFFFFFFFF
@A00155:342:HHGFNDSXY:1:2176:20193:28761 1:N:0:GAACCTAG+TCCGCATA
CAAGCCCGAGTACATCTCCTTTGGAAGTAGGAGACCCCTCCGGTCTTGTCCAACCTCTGTTTCGGCA
GAGGATACCGTGCTCCACAGCTGTAAGGCTGTGGGCCCGAGAGAAGTCGCTCTCTCTCGCCCTCCACA
+
FFFFFFFFFFFFFFFFFFFFFFFFFFFFFFFFFFFFFFFFFFFFFFFFFFFFFFFFFFFFFFFFFFFFF
FFFFFFFFFFFFFFFFFFFFFFFFFFFFFFFFFFFFFFFFFFFFFFFFFFFFFFFFFFFFFFFFFFFFF
@A00155:342:HHGFNDSXY:1:2177:25536:13150 1:N:0:GAACCTAG+TCCGCATA
GCGACTTCTCTCGGGCCCACAGCCTTACAGCTGTGGAGCACGGTATCCTCTGCCGAAACAGAGGTTGG
ACAAGACCGGAGGGGTCTCCTGGTTCCAAAGGAGATGTACTCCGGGCTTGTTACACGACCTACCG
+
FFFFFFFFFFFFFFFFFFFFFFFFFFFFFFFFFFFFFFFFFFFFFFFFFFFFFFFFFFFFFFFFFFFFF
FFFFFFFFFFFFFFFFFFFFFFFFFFFFFFFFFFFFFFFFFFFFFFFFFFFFFFFFFFFFFFFFFFFFF:F
@A00155:342:HHGFNDSXY:1:2177:5801:25661 1:N:0:GAACCTAG+TCCGCATA
GAGGGCGAGAGAGAGCGACTTCTCTCGGGCCCACAGCCTTACAGCTGTGGAGCACGGTATCCTCTGCC
GAAACAGAGGTTGGACAAGACCGGAGGGGTCTCCTAGTTCCAAAGGAGATGTACTCCGGGCTTGTTCA
+
FFF,FFFFFFFFFFFF,FFFFFFFFFFFFFFFFFFFFFFFFFFFFFFFFFFFFFFFFFFFFFFFFFFFF:,FFF::FFFFF
F:FFFFFF,F::FFFFFFFFF:FFFFFFF:F:FFFFFF:F,FFFFFFFF:FFFFFFF:FFFFFFFFFF
@A00155:342:HHGFNDSXY:1:2177:29704:27383 1:N:0:GAACCTAG+TCCGCATA
TGTGTCCACTTAAGGACTCACCTCTGGCCTATGGTCATCTCAATGCCGAGAGGGATGTAGAGGGCGAG
AGAGAGCGACTTCTCTCGGGCCCACAGCCTTACAGCTGTGGAGCACGGTATCCTCTGCCGAAACAGAG
+
FFFFFFFFFFFFFFFFFFFFFFFFFFFFFFFFFFFFFFFFFFFFFFFFFFFFFFFFFFFFFFFFFFFFF
FFFFFFFFFFFFFFFFFFFFFFFFFFFFFFFFFFFFFFFFFFFFFFFFFFFFFFFFFFFFFFFFFFFFF
@A00155:342:HHGFNDSXY:1:2177:29514:27461 1:N:0:GAACCTAG+TCCGCATA
TGTGTCCACTTAAGGACTCACCTCTGGCCTATGGTCATCTCAATGCCGAGAGGGATGTAGAGGGCGAG
AGAGAGCGACTTCTCTCGGGCCCACAGCCTTACAGCTGTGGAGCACGGTATCCTCTGCCGAAACAGAG
+
FFFFFFFFFFFFFFFFFFFFFFFFFFFFFFFFFFFFFFFFFFFFFFFFFFFFFFFFFFFFFFFFFFFFF
FFFFFFFFFFFFFFFFFFFFFFFFFFFFFFFFFFFFFFFFFFFFFFFFFFFFFFFFFFFFFFFFFFFFF
@A00155:342:HHGFNDSXY:1:2177:29668:27602 1:N:0:GAACCTAG+TCCGCATA
TGTGTCCACTTAAGGACTCACCTCTGGCCTATGGTCATCTCAATGCCGAGAGGGATGTAGAGGGCGAG
AGAGAGCGACTTCTCTCGGGCCCACAGCCTTACAGCTGTGGAGCACGGTATCCTCTGCCGAAACAGAG
+

```



FFFFFFFFFFFFFFFFFFFFFFFFFFFFFFFFFFFFFFFFFFFFFFFFFFFFFFFFFFFFFFFF:FFFF:FFFFFFFFFFFFF  
FFFFFFFFFFFFFFFFFFFFFFFFFFFFFFFFFFFFFFFFFFFFFFFFFFFFFFFFFFFFFFFF:FFFFFFFFFFFFFFFFFFFFFFFFFFFFFFFF  
@A00155:342:HHGFNDSXY:1:2178:7853:4100 1:N:0:GAACCTAG+TCCGCATA  
GGGCGAGAGAGAGCGACTTCTCTCGGGCCACAGCCTTACAGCTGTGGAGCACGGTATCCTCTGCCGA  
AACAGAGGTTGGACAAGACCGGAGGGGTCTCCTGGTTCCAAAGGAGATGTACTCCGGGCTTGTTACG  
+  
FFFFFFFFFFFFFFFFFFFFFFFFFFFFFFFFFFFFFFFFFFFFFFFFFFFFFFFFFFFFFFFFFFFFFFFF  
FFFFFFFFFFFFFFFFFFFFFFFFFFFFFFFFFFFFFFFFFFFFFFFFFFFFFFFFFFFFFFFF:FFFFFFFFFFFFFFFFFFFFFFFF  
@A00155:342:HHGFNDSXY:1:2178:28203:6809 1:N:0:GAACCTAG+TCCGCATA  
GGATGTGGAGGGCGAGAGAGAGCGACTTCTCTCGGGCCACAGCCTTACAGCTGTGGAGCACGGTATC  
CTCTGCCGAAACAGAGGTTGGACAAGACCGGAGGGGTCTCCTAGTTCCAAAGGAGATGTACTCC  
+  
FFFFF:FFFFFFFFFFFFFFFFFFFFFFFFFFFFFFFFFFFFFFFFFFFFFFFFFFFFFFFFFFFFFFFF:FFFFFFFFFFFFFFFFFFFFFFFF  
FFFFFFFFFFFFFFFFFFFFFFFFFFFFFFFFFFFFFFFFFFFFFFFFFFFFFFFFFFFFFFFFFFFFFFFF  
@A00155:342:HHGFNDSXY:1:2178:24532:8750 1:N:0:GAACCTAG+TCCGCATA  
GAGGGCGAGAGAGAGCGACTTCTCTCGGGCCACAGCCTTACAGCTGTGGAGCACGGTATCCTCTGCC  
GAAACAGAGGTTGGACAAGACCGGAGGGGTCTCCTAGTTCCAAAGGAGATGTACTCCGGGCTTGTTCA  
+  
FFFFFFFFFFFFFFFFFFFFFFFFFFFFFFFFFFFFFFFFFFFFFFFFFFFFFFFFFFFFFFFFFFFFFFFF  
FFFFFFFFFFFFFFFFFFFFFFFFFFFFFFFFFFFFFFFFFFFFFFFFFFFFFFFFFFFFFFFFFFFFFFFF  
@A00155:342:HHGFNDSXY:1:2201:15212:9862 1:N:0:GAACCTAG+TCCGCATA  
CCGCCACACCGCCTTAGATCAGCTGTGTCCACTTAAGGACTCACCTCTGGCCTATGGTCATCTCAATG  
CCGAGAGGGATGTGGAGGGCGAGAGAGAGCGACTTCTCTCGGGCCACAGCCTTACAGCTGTGGAGC  
+  
FF,FFFFF:FFF:FFFFFFFFFFFFFFFFFFFFFFFF:FFF::FF:FFFFFFFFFF::FF:FFFFFFFF,FFFFFFF  
:FFF:FFFFF:FFFFF,FFFFFFFFFFFFFFFFFFFFFFFFFFFFFFFF,FFFFFFFFFFFFFFFFFFFFFFFF:FF  
@A00155:342:HHGFNDSXY:1:2201:8088:27586 1:N:0:GAACCTAG+TCCGCATA  
GAGGGCGAGAGAGAGCGACTTCTCTCGGGCCACAGCCTTACAGCTGTGGAGCACGGTATCCTCTGCC  
GAAACAGAGGTTGGACAAGACCGGAGGGGTCTCCTAGTTCCAAAGGAGATGTACTCCGGGCTTGTTCA  
+  
FFFFFFFFF,FFFFFFFFFFFFFFFFFFFFFFFFFFFFFFFF:FFFFFFF,FFFFFFFFFFFFFFFFFFFFFFFFFFFFFFFF  
FFFFFFFFF,FFFFFFFFFFFF,FF:FFFFFFFFFFFFFFFF:FFFFFFFFFFFFFFFFFFFFFFFFFFFFFFFF  
@A00155:342:HHGFNDSXY:1:2201:8015:27649 1:N:0:GAACCTAG+TCCGCATA  
GAGGGCGAGAGAGAGCGACTTCTCTCGGGCCACAGCCTTACAGCTGTGGAGCACGGTATCCTCTGCC  
GAAACAGAGGTTGGACAAGACCGGAGGGGTCTCCTAGTTCCAAAGGAGATGTACTCCGGGCTTGTTCA  
+  
FFFFFFFFFFFFFFFFFFFFFFFFFFFFFFFFFFFFFFFFFFFFFFFFFFFFFFFFFFFFFFFFFFFFFFFF:FFFFFFFFFFFFF  
FFFFFFFFFFFFFFFFFFFF,FFF:FFFFFFFFFFFFF,FFFFFFFFFFFF:FFFF,FFFFFFFFFFFFFFFFFFFF  
@A00155:342:HHGFNDSXY:1:2201:23656:29371 1:N:0:GAACCTAG+TCCGCATA  
CTCTGGCCTATGGTCATCTCAATGCCGAGAGGGATGTGGAGGGCGAGAGAGAGCGACTTCTCTCGGGC  
CCACAGCCTTACAGCTGTGGAGCACGGTATCCTCTGCCGAAACAGAGGTTGGACAAGACCGGAGGGGT  
+  
FFFFFFFFFFFFFFFFFFFFFFFFFFFFFFFFFFFFFFFFFFFFFFFFFFFFFFFFFFFFFFFFFFFFFFFF:FFFFFFFFFFFFFFFFFFFFFFFF  
FFFFFFFFFFFFFFFFFFFFFFFFFFFFFFFFFFFFFFFFFFFFFFFFFFFFFFFFFFFFFFFFFFFFFFFF:FFFFFFFFFFFFFFFFFFFFFFFF  
@A00155:342:HHGFNDSXY:1:2201:18674:36088 1:N:0:GAACCTAG+TCCGCATA  
ATGCCGAGAGGGATGTGGAGGGCGAGAGAGAGCGACTTCTCTCGGGCCACAGCCTTACAGCTGTGGA  
GCACGGTATCCTCTGCCGAAACAGAGGTTGGACAAGACCGGAGGGGTCTCCTGGTTCCAAAGGAGATG  
+  
FFFFFFFFFFFF:FFFFFFFFFFFFFFFFFFFFFFFFFFFFFFFFFFFFFFFFFFFFFFFFFFFFFFFFFFFFFFFF  
FFFFFFFFFFFFFFFFFFFFFFFFFFFFFFFFFFFFFFFFFFFFFFFFFFFFFFFFFFFFFFFFFFFFFFFF  
@A00155:342:HHGFNDSXY:1:2201:25581:36495 1:N:0:GAACCTAG+TCCGCATA  
GTCATCTCAATGCCGAGAGGGATGTGGAGGGCGAGAGAGAGCGACTTCTCTCGGGCCACAGCCTTAC  
AGCTGTGGAGCACGGTATCCTCTGCCGAAACAGAGGTTGGACAAGACCGGAGGGGTCTCCTAGTTCCA  
+

FFFFFFFFFFFFFFFF,F:FFFFFFFFFFFFFFFF:FFFFFFFFFFFFFFFFFFFFFFFFFFFFFFFF:FFFF  
:FFFFFFFF:FF:FFFFFFFFFFFFFFFF:FFFFFFFFFFFFFFFFFFFFFFFF:FFFFFFFFFFFF:F,FF:FFFF  
@A00155:342:HHGFNDSXY:1:2202:26892:4820 1:N:0:GAACCTAG+TCCGCATA  
AGCGACTTCTCTCGGGCCACAGCCTTACAGCTGTGGAGCACGGTATCCTCTGCCGAAACAGAGGTTG  
GACAAGACCGAGGGGTCTCCTAGTTCCAAAGGGGATGTACTCCGGGCTTGTTACGACCTACCGTGT  
+  
FFFFFFFFFFFFFFFFFFFFFFFFFFFFFFFF:FFFFFFFFFFFFFFFFFFFFFFFFFFFFFFFFFFFFFFFF  
FFFFFFFFFFFFFFFFFFFFFFFFFFFFFFFFFFFFFFFF:FFFFFFFFFFFFFFFFFFFFFFFFFFFFFFFF:FFFFFFFF  
@A00155:342:HHGFNDSXY:1:2202:24144:7921 1:N:0:GAACCTAG+TCCGCATA  
CTCTGGCCTATGGTCATCTCAATGCCGAGAGGGATGTGGAGGGCGAGAGAGAGCGACTTCTCTCGGGC  
CCACAGCCTTACAGCTGTGGAGCACGGTATCCTCTGCCGAAACAGAGGTTGGACAAGACCGAGGGGT  
+  
FFFFFFFFFFFFFFFFFFFFFFFFFFFFFFFFFFFFFFFFFFFFFFFFFFFFFFFFFFFFFFFFFFFFFFFF  
FFFFFFFFFFFF:FFFFFF:FFFFFFFFFFFFFFFFFFFFFFFFFFFFFFFFFFFFFFFFFFFFFFFFFFFF:F:  
@A00155:342:HHGFNDSXY:1:2202:24903:9048 1:N:0:GAACCTAG+TCCGCATA  
TGCCGAGAGGGATGTGGAGGGCGAGAGAGAGCGACTTCTCTCGGGCCACAGCCTTACAGCTGTGGAG  
CACGGTATCCTCTGCCGAAACAGAGGTTGGACAAGACCGAGGGGTCTCCTAGTTCCAAAGGAGATGT  
+  
FFFFFFFFFFFFF:F:FFFFFFFFFFFFFFFFFFFFFFFFFFFFFFFFFFFFFFFFFFFFFFFFFFFFFFFF  
FFFFFFFFFFFFFFFFFFFFFFFFFFFFFFFFFFFFFFFFFFFFFFFFFFFFFFFFFFFFFFFFFFFFFFFFFFFF  
@A00155:342:HHGFNDSXY:1:2202:27010:12258 1:N:0:GAACCTAG+TCCGCATA  
CCTTACAGCTGTGGAGCACGGTATCCTCTGCCGAAACAGAGGTTGGACAAGACCGAGGGGTCTCCTG  
GTTCCAAAGGAGATGTACTCCGGGCTTGTTACGACCTACCGTGTAAGTCGTAGTCTAGTAGGCTACC  
+  
FFFFFFFFFFFFFFFFFFFFFFFFFFFFFFFFFFFFFFFFFFFFFFFFFFFFFFFFFFFFFFFFFFFFFFFF  
FFFFFFFFFFFFFFFFFFFF:FFFFFFFFFFFFFFFFFFFFFFFFFFFFFFFFFFFFFFFFFFFFFFFFFFFF  
@A00155:342:HHGFNDSXY:1:2202:26621:17628 1:N:0:GAACCTAG+TCCGCATA  
ACCTCTGTTTCGGCAGAGGATACCGTGCTCCACAGCTGTAAGGCTGTGGGCCCCGAGAGAAGTCGCTCT  
CTCTCGCCCTCCACATCCCTCTCGGCATTGAGATGACCATAGGCCAGAGGTGAGTCCTTAAGTGGACA  
+  
FFFFFFFFFFFFFFFFFFFFFFFFFFFFFFFFFFFFFFFF:FFFFFFFFFFFFFFFFFFFFFFFFFFFFFFFF  
FFFFFFFFFFFFFFFFFFFFFFFFFFFFFFFF:FFFFFFFFFFFFFFFFFFFFFFFFFFFFFFFFFFFFFFFF  
@A00155:342:HHGFNDSXY:1:2202:25464:20979 1:N:0:GAACCTAG+TCCGCATA  
CAATGCCGAGAGGGATGTAGAGGGCGAGAGAGAGCGACTTCTCTCGGGCCACAGCCTTACAGCTGTG  
GAGCACGGTATCCTCTGCCGAAACAGAGGTTGGACAAGACCGAGGGGTCTCCTAGTTCCAAAGGAGA  
+  
FFFFFFFFFFFFFFFFFFFFFFFFFFFFFFFFFFFFFFFFFFFFFFFFFFFFFFFFFFFFFFFFFFFFFFFF  
FFFFFFFFFFFFFFFFFFFFFFFFFFFFFFFFFFFFFFFF:FFFFFFF,FFFFFFFFFFFFFFFFFFFFFFFF, :FFFF  
@A00155:342:HHGFNDSXY:1:2202:32036:31109 1:N:0:GAACCTAG+TCCGCATA  
CCTCTGGCCTATGGTCATCTCAATGCCGAGAGGGATGTGAAGGGCGAGAGAGAGCGACTTCTCTCGGG  
CCCACAGCCTTACAGCTGTGGAGCACGGTATCCTCTGCCGAAACAGAGGTTGGACAAGACCGGA  
+  
FFFFFFFFFFFFFFFFFFFFFFFFFFFFFFFFFFFFFFFFFFFFFFFFFFFFFFFFFFFFFFFFFFFFFFFF  
FFFFFFFFFFFFFFFFFFFFFFFFFFFFFFFFFFFFFFFFFFFFFFFFFFFFFFFFFFFFFFFFFFFFFFFF  
@A00155:342:HHGFNDSXY:1:2204:2003:1391 1:N:0:GAACCTAG+TCCGCATA  
TTACAGCTGTGGAGCACGGTATCCTCTGCCGAAACAGAGGTTGGACAAGACCGAGGGGTCTCCTAGT  
TCCAAAGGAGATGTACTCCGGGCTTGTTACGACCTACCGTGTAAGTCGTAGTCTAGTAGGCTACCTG  
+  
:FFFFFFFFFFFFFFFFFFFFFFFFFFFFFFFFFFFFFFFFFFFFFFFFFFFFFFFFFFFFFFFFFFFFFFFF  
FFFFFFFFFFFFFFFFFFFFFFFFFFFFFFFFFFFFFFFFFFFFFFFFFFFFFFFFFFFF:FFFFF:FFFFFFFF:FFF:FFFF  
@A00155:342:HHGFNDSXY:1:2204:12228:28025 1:N:0:GAACCTAG+TCCGCATA  
AAGGACTCACCTCTGGCCTATGGTCATCTCAATGCCGAGAGGGATGTGGAGGGCGAGAGAGAGCGACT  
TCTCTCGGGCCACAGCCTTACAGCTGTGGAGCACGGTATCCTCTGCCGAAACAGAGGTTGGACAAGA  
+

FFFFFFFFFFFFFFFFFFFFFFFFFFFFFFFFFFFFFFFFFFFFFFFFFFFFFFFFFFFFFFFFFFFFFFFF  
FFFFFFFFFFFFFFFFFFFFFFFFFFFFFFFFFFFFFFFFFFFFFFFFFFFFFFFFFFFFFFFFFFFFFFFF  
@A00155:342:HHGFNDSXY:1:2205:27624:4867 1:N:0:GAACCTAG+TCCGCATA  
GAGAGCGACTTCTCTCGGGCCACAGCCTTACAGCTGTGGAGCACGGTATCCTCTGCCGAAACAGAGG  
TTGGACAAGACCGGAGGGGTCTCCTAGTTCCAAAGGAGATGTACTCCGGGCTTGTTACGACCTACCG  
+  
FFFFFFFFFFFFFFFFFFFFFFFFFFFFFFFFFFFFFFFFFFFFFFFFFFFFFFFFFFFFFFFFFFFFFFFF  
FFFFFFFFFFFFFFFFFFFFFFFFFFFFFFFFFFFFFFFFFFFFFFFFFFFFFFFFFFFFFFFFFFFFFFFF  
@A00155:342:HHGFNDSXY:1:2205:17770:9157 1:N:0:GAACCTAG+TCCGCATA  
CACCTCTGGCCTATGGTCATCTCAATGCCGAGAGGGATGTGGAGGGCGAGAGAGAGCGACTTCTCTCG  
GGCCACAGCCTTACAGCTGTGGAGCACGGTATCCTCTGCCGAAACAGAGGTTGGACAAGACCGGAGG  
+  
FFFFFFFFFFFFFFFFFFFFFFFFFFFFFFFFFFFFFFFFFFFFFFFFFFFFFFFFFFFFFFFFFFFFFFFF  
FFFFFFFFFFFFFFFFFFFFFFFFFFFFFFFFFFFFFFFFFFFFFFFFFFFFFFFFFFFFFFFFFFFFFFFF  
@A00155:342:HHGFNDSXY:1:2205:6334:13182 1:N:0:GAACCTAG+TCCGCATA  
CTTCTCTCGGGCCACAGCCTTACAGCTGTGGAGCACGGTATCCTCTGCCGAAACAGAGGTTGGACAA  
GACCGGAGGGGTCTCCTAGTTCCAAAGGAGATGTACTCCGGGCTTGTTACGACCTACCGTGTAAGTC  
+  
FFFFFFFFFFFFFFFFFFFFFFFF,FFFFFFFFFFFFFFFF,FF:FF:FFFFFFFFFFFFFFFFFFFFFFFF  
,FFFFFFFFFFFFFFFFFFFFFFFFFFFFFFFFFFFFFFFFFFFFFFFFFFFFFFFFFFFFFFFF:FFFFFFFF  
@A00155:342:HHGFNDSXY:1:2205:14696:15233 1:N:0:GAACCTAG+TCCGCATA  
TTAAGGACTCTCCTCTGGCCTATGGTCATCTCAATGCCGAGAGGGATGTGGAGGGCGAGAGAGAGCGA  
CTTCTCTCGGGCCACAGCCTTACAGCTGTGGAGCACGGTATCCTCTGCCGAAACAGAGGTTGGACAA  
+  
FFFFFFFFFFFFFFFFFFFFFFFFFFFFFFFFFFFFFFFFFFFFFFFFFFFFFFFFFFFFFFFFFFFFFFFF  
FFFFFFFFFFFFFFFFFFFFFFFF,FFFFFFFFFFFFFFFF:FFFFFFFFFFFFFFFFFFFFFFFFFFFFFFFF  
@A00155:342:HHGFNDSXY:1:2205:3929:15687 1:N:0:GAACCTAG+TCCGCATA  
GATGTGGAGGGCGAGAGAGAGCGACTTCTCTCGGGCCACAGCCTTACAGCTGTGGAGCACGGTATCC  
TCTGCCGAAACAGAGGTTGGACAAGACCGGAGGGGTCTCCTAGTTCCAAAGGAGATGTACTCCGGGCT  
+  
FFFFF:FFFFFFFFFFFFFFFFFFFFFFFFFFFFFFFFFFFFFFFFFFFFFFFFFFFFFFFFFFFFFFFF  
FFFFFFFFFFFFFFFFFFFFFFFFFFFFFFFFFFFFFFFFFFFFFFFFFFFFFFFFFFFFFFFF:FF,FFFFFFFF  
@A00155:342:HHGFNDSXY:1:2205:29134:18161 1:N:0:GAACCTAG+TCCGCATA  
GGTCTTGTCCAACCTCTGTTTCGGCAGAGGATACCGTGCTCCACAGCTGTAAGGCTGTGGGCCCGAGA  
GAAGTCGCTCTCTCTCGCCCTTACATCCCTCTCGGCATTGAGATGACCATAGGCCAGAG  
+  
FFFFFFFFFFFFFFFFFFFFFFFFFFFFFFFFFFFFFFFFFFFFFFFFFFFFFFFFFFFFFFFFFFFFFFFF  
FFFFFFFFFFFFFFFFFFFFFFFFFFFFFFFFFFFFFFFFFFFFFFFFFFFFFFFFFFFFFFFFFFFFFFFF  
@A00155:342:HHGFNDSXY:1:2205:13774:21277 1:N:0:GAACCTAG+TCCGCATA  
GAGGGCGAGAGAGAGCGACTTCTCTCGGGCCACAGCCTTACAGCTGTGGAGCACGGTATCCTCTGCC  
GAAACAGAGGTTGGACAAGACCGGAGGGGTCTCCTAGTTCCAAAGGAGATGTACTCCGGGCTTGTTCA  
+  
FFFFFFFFFFFFFFFF:FFFF:FF:FFF:FFFFFFFFFFFFFFFFFFFFFFFFFFFFFFFF: :F:F:,FFF,FF  
FFFFFFFF:FF,FFFFFFFFFFFF:FF:FFFFFFFFFFFFFFFF:FFFFFFFFFFFFFFFF: ,FFFFFF:FF  
@A00155:342:HHGFNDSXY:1:2205:6216:22467 1:N:0:GAACCTAG+TCCGCATA  
GACTTCTCTCGGGCCACAGCCTTACAGCTGTGGAGCACGGTATCCTCTGCCGAAACAGAGGTTGGAC  
AAGACCGGAGGGGTCTCCTAGTTCCAAAGGAGATGTACTCCGGGCTTGTTACGACCTACCGTGTAAG  
+  
FFFFFFFFFFFFFFFFFFFFFFFF:FFFF:FFFFFFFFFFFFFFFFFFFFFFFFFFFFFFFFFFFFFFFF  
:FFFFFFFFFFFFFFFFFFFFFFFF,FFFFFFFFFFFFFFFFFFFFFFFFFFFFFFFF:FFFFFFFF:F:FFF  
@A00155:342:HHGFNDSXY:1:2205:22544:22498 1:N:0:GAACCTAG+TCCGCATA  
TTCTCTCGGGCCACAGCCTTACAGCTGTGGAGCACGGTATCCTCTGCCGAAACAGAGGTTGGACAAG  
ACCGGAGGGGTCTCCTAGTTCCAAAGGAGATGTACTCCGGGCTTGTTACGACCTACCGTGTAAGTCG  
+

FFFFFFFFFFFFFFFFFFFFFFFFFFFFFFFFFFFFFFFFFFFFFFFFFFFFFFFFFFFFFFFFFFFFF  
@A00155:342:HHGFNDSXY:1:2206:7030:8688 1:N:0:GAACCTAG+TCCGCATA  
AGAGAGAGCGACTACTCTCGGGCCCACAGCCTTACAGCTGTGGAGCACGGTATCCTCTGCCGAAACAG  
AGGTTGGACAAGACCGGAGGGGTCTCCTAGTTCCAAAGGAGATGTACTCCGGGCTTGTTACGACCTA  
+  
FFFFFFFFFFFFFFFFFFFFFFFFFFFFFFFFFFFFFFFFFFFFFFFFFFFFFFFFFFFFFFFFFFFFF  
FFFFFFFFFFFFFF:F:FFFFFFFFFFFFFFFFFFFFFFFFFFFFFFFFFFFFFFFFFFFFFFFFFFFF:  
@A00155:342:HHGFNDSXY:1:2206:7274:15812 1:N:0:GAACCTAG+TCCGCATA  
GAGGGCGAGAGAGAGCGACTTCTCTCGGGCCCACAGCCTTACAGCTGTGGAGCACGGTATCCTCTGCC  
GAAACAGAGGTTGGACAAGACCGGAGGGGTCTCCTAGTTCCAAAGGAGATGTACTCCGGGCTTGTTCA  
+  
FFFFFFFFFFFFFFFFFFFFFFFFFFFFFFFFFFFFFFFFFFFFFFFFFFFFFFFFFFFFFFFFFFFFF  
FFFFFFFFFFFFFF:F:FFFFFFFFFFFFFFFFFFFFFFFFFFFFFFFFFFFFFFFFFFFFFFFFFFFF:  
@A00155:342:HHGFNDSXY:1:2206:9245:26052 1:N:0:GAACCTAG+TCCGCATA  
AAGGACTCTCCTCTGGCCTATGGTCATCTCAATGCCGAGAGGGATGTGGAGGGCGAGAGAGCGACT  
TCTCTCGGGCCCACAGCCTTACAGCTGTGGAGCACGGTATCCTCTGCCGAAACAGAGGTTGGACAAGA  
+  
FFFFFFFFFFFFFFFFFF:F:FFFFFFFFFFFFFFFFFFFFFFFFFFFFFFFFFFFFFFFFFFFFF:  
FFFFFFFFFFFFFFFF,F:FFFFFFFFFFFFFFFFFFFFFFFFFFFFFFFFFFFFFFFFFFFFF:  
@A00155:342:HHGFNDSXY:1:2207:27670:4163 1:N:0:GAACCTAG+TCCGCATA  
TTCTCTCGGGCCCCACAGCCTTACAGCTGTGGAGCACGGTATCCTCTGCCGAAACAGAGGTTGGACAAG  
ACCGGAGGGGTCTCCTGGTTCCAAAGGAGATGTACTCCGGGCTTGTTACGACCTACCGTGTAAGTCG  
+  
FFFFFFFFFFFFFFFFFFFFFFFFFFFFFFFFFFFFFFFFFFFFFFFFFFFFFFFFFFFFFFFFFFFFF  
FFFFFFFFFFFFFFFFFFFFFFFFFFFFFFFFFFFFFFFFFFFFFFFFFFFFFFFFFFFFFFFFFFFFF:  
@A00155:342:HHGFNDSXY:1:2207:15700:5290 1:N:0:GAACCTAG+TCCGCATA  
AGGGCGAGAGAGAGCGACTTCTCTCGGGCCCACAGCCTTACAGCTGTGGAGCACGGTATCCTCTGCCG  
AAACAGAGGTTGGACAAGACCGGAGGGGTCTCCTAGTTCCAAAGGAGATGTACTCCGGGCTTGTTAC  
+  
FFFFFFFFFFFFFFFFFFFFFFFFFFFFFFFFFFFFFFFFFFFFFFFFFFFFFFFFFFFFFFFFFFFFF,  
FFFFFFFFFFFFFFFFFFFFFFFFFFFFFFFFFFFFFFFFFFFFFFFFFFFFFFFFFFFFFFFFFFFFF:  
@A00155:342:HHGFNDSXY:1:2207:20555:6308 1:N:0:GAACCTAG+TCCGCATA  
TCCACATCCCTCTCGGCATTGAGATGACCATAGGCCAGAGGTGAGTCCTTAAGTGGACACAGCTGATC  
TAAGGCGGTGTGGCGGGCATGGGTTTGAACCCCATGACGGTCGGAGTCTAGTAGGCTCCCTGATGA  
+  
FFFFFFFFFFFFFFFFFFFFFFFFFFFFFFFFFFFFFFFFFFFFFFFFFFFFFFFFFFFFFFFFFFFFF  
FFFFFFFFFFFFFFFFFFFFFFFFFFFFFFFFFFFFFFFFFFFFFFFFFFFFFFFFFFFFFFFFFFFFF:  
@A00155:342:HHGFNDSXY:1:2207:30183:17534 1:N:0:GAACCTAG+TCCGCATA  
TTACAGCTGTGGAGCACGGTATCCTCTGCCGAAACAGAGGTTGGACAAGACCGGAGGGGTCTCCTAGT  
TCCAAAGGAGATGTACTCCGGGCTTGTTACGACCTACCGTGTAAGTCGTAAGTCTAGTAGGCTACCTG  
+  
FF:FFFFFFFFFFFFFFFFFFFFFFFFFFFFFFFFFFFFFFFFFFFFFFFFFFFFFFFFFFFFFFFFFFFFF  
FFFFFFFFFFFFFFFFFF:F:FFFFFFFFFFFFFFFFFFFFFFFFFFFFFFFFFFFFFFFFFFFFFFFFFFFF:  
@A00155:342:HHGFNDSXY:1:2207:10122:18082 1:N:0:GAACCTAG+TCCGCATA  
CCGCCACACCGCCTTAGATCAGCTGTGTCCAATTAAAGACTCACCTCTGGCCTATGGTCATCTCAATG  
CCGAGAGGGATGTGGTGGGCGAGAGAGAGCGACTTCTCTCGGGCCCACAGCCTTACAGCTGTGGAGCA  
+  
FFFFFFFFFFFFFFFFFFFFFFFFFFFFFFFFFFFFFFFFFFFFFFFFFFFFFFFFFFFFFFFFFFFFF:  
FFFFFFFFFFFFFFFFFFFFFFFFFFFFFFFFFFFFFFFFFFFFFFFFFFFFFFFFFFFFFFFFFFFFF:  
@A00155:342:HHGFNDSXY:1:2207:10547:18724 1:N:0:GAACCTAG+TCCGCATA  
CCGCCACACCGCCTTAGATCAGCTGTGTCCAATTAAAGACTCACCTCTGGCCTATGGTCATCTCAATG  
CCGAGAGGGATGTGGTGGGCGAGAGAGAGCGACTTCTCTCGGGCCCACAGCCTTACAGCTGTGGAGCA

```

FFFFFFFFFFFFFFFFFFFFFFFFFFFFFFFFFFFFFFFFFFFFFFFFFFFFFFFFFFFFFFFFFFFFF
FFFFFFFFFFFFFFFFFFFFFFFFFFFFFFFFFFFFFFFFFFFFFFFFFFFFFFFFFFFFFFFFFFFFF
@A00155:342:HHGFNDSXY:1:2207:10393:19241 1:N:0:GAACCTAG+TCCGCATA
CCGCCACACCGCCTTAGATCAGCTGTGTCCACTTAAGGACTCACCTCTGGCCTATGGTCATCTCAATG
CCGAGAGGGATGTGGTGGGCGAGAGAGAGCGACTTCTCTCGGGCCCACAGCCTTACAGCTGTGGAGCA
+
FF:FFFFFFFFFFFFFFFFFFFFFFFFFFFFFFFFFFFFFFFFFFFFFFFFFFFFFFFFFFFFFFFFF
FFFFFFFFFFFFFFFFFFFFFFFFFFFFFFFFFFFFFFFFFFFFFFFFFFFFFFFFFFFFFFFFFFFFF
@A00155:342:HHGFNDSXY:1:2207:32190:27774 1:N:0:GAACCTAG+TCCGCATA
GAGAGGGATGTGGAGGGCGAGAGAGAGCGACTTCTCTCGGGCCCACAGCCTTACAGCTGTGGAGCACG
GTATCCTCTGCCGAAACAGAGGTTTGACAAGACCGGAGGGGTCTCCTAGTTCAAAGGAGATGTACTC
+
FFFFFFFFFFFFFFFFFFFFFFFFFFFFFFFFFFFFFFFFFFFFFFFFFFFFFFFFFFFFFFFFFFFFF, FFFFFFFFFFFFFFFFFFFFFFFFFFFFFFFFFFFFFFFFFFFFFFFFFFFFFFFFFFFFFF: FFFFFFFFFFFFFFFF: FFFF
FFFFFFFFFFFFFFFFFFFFFFFFFFFFFFFFFFFFFFFFFFFFFFFFFFFFFFFFFFFFFFFFFFFFF: FFFFFFFFFFFFFFFFFFFFFFFFFFFFFFFFFFFFFFFFFFFFFFFFFFFFFFFFFFFFFF
@A00155:342:HHGFNDSXY:1:2207:2437:36902 1:N:0:GAACCTAG+TCCGCATA
GCGAGAGAGAGCGACTTCTCTCGGGCCCACAGCCTTACAGCTGTGGAGCACGGTATCCTCTGCCGAAA
CAGAGGTTTGACAAGACCGGAGGGGTCTCCTAGTTCAAAGGAGATGTACTCCGGGCTTGTTACACGAC
+
FFFFFFFFFFFFFFFFFFFFFFFFFFFFFFFFFFFFFFFFFFFFFFFFFFFFFFFFFFFFFFFFFFFFF: FFFFFFFFFFFFFFFFFFFFFFFFFFFFFFFFFFFFFFFFFFFFFFFFFFFFFFFFFFFFFF: FFFFFFFFFFFFFFFF
FFFFFFFFFFFFFFFFFFFFFFFFFFFFFFFFFFFFFFFFFFFFFFFFFFFFFFFFFFFFFFFFFFFFF: FFFFFFFFFFFFFFFFFFFFFFFFFFFFFFFFFFFFFFFFFFFFFFFFFFFFFFFFFFFFFF
@A00155:342:HHGFNDSXY:1:2208:2808:3912 1:N:0:GAACCTAG+TCCGCATA
GCTCCACAGCTGTAAGGCTGTGGGCCCCGAGAGAAGTCGCTCTCTCTCGCCCTCCACATCCCTCTCGGC
ATTGAGATGACCATAGGCCAGAGGTGAGTCCTTAAGTGGACACAGCTGATCTAAGGCGGTGTGGCGGG
+
FFFFFFFFFFFFFFFFFFFFFFFFFFFFFFFFFFFFFFFFFFFFFFFFFFFFFFFFFFFFFFFFFFFFF
FFFFFFFFFFFFFFFFFFFFFFFFFFFFFFFFFFFFFFFFFFFFFFFFFFFFFFFFFFFFFFFFFFFFF: FFFFFFFFFFFFFFFF: FFFFFFFFFFFFFFFF: FFFFFFFFFFFFFFFF
@A00155:342:HHGFNDSXY:1:2208:2790:4131 1:N:0:GAACCTAG+TCCGCATA
GCTCCACAGCTGTAAGGCTGTGGGCCCCGAGAGAAGTCGCTCTCTCTCGCCCTCCACATCCCTCTCGGC
ATTGAGATGACCATAGGCCAGAGGTGAGTCCTTAAGTGGACACAGCTGATCTAAGGCGGTGTGGCGGG
+
FFFFFFFFFFFFFFFFFFFFFFFFFFFFFFFFFFFFFFFFFFFFFFFFFFFFFFFFFFFFFFFFFFFFF
FFFFFFFFFFFFFFFFFFFFFFFFFFFFFFFFFFFFFFFFFFFFFFFFFFFFFFFFFFFFFFFFFFFFF: FFFF: FFFFFFFFFFFFFFFFFFFFFFFF: FFFFFFFFFFFFFFFF
@A00155:342:HHGFNDSXY:1:2208:19994:12132 1:N:0:GAACCTAG+TCCGCATA
AGAGAGAGCGACTTCTCTCGGGCCCACAGCCTTACAGCTGTGGAGCACGGTATCCTCTGCCGAAACAG
AGGTTTGACAAGACCGGAGGGGTCTCCTAGTTCAAAGGAGATGTACTCCGGGCTTGTTACACGACCT
+
FFFFF: FFFFFFFFFFFFFFFFFFFFFFFFFFFFFFFFFFFFFFFFFFFFFFFFFFFFFFFFFFFFFF: FFFFFFFFFFFFFFFFFFFFFFFFFFFFFFFFFFFFFFFFFFFFFFFFFFFFFFFFFFFFFF
FFFFFFFFFFFFFFFFFFFFFFFFFFFFFFFFFFFFFFFFFFFFFFFFFFFFFFFFFFFFFFFFFFFFF: FFF: FFFFFFFFFFFFFFFFFFFFFFFF: FFFFFFFFFFFFFFFF
@A00155:342:HHGFNDSXY:1:2208:18059:18333 1:N:0:GAACCTAG+TCCGCATA
ATGCCCGCCACACCGCCTTAGATCAGCTGTGTCCACTTAAGGACTCACCTCTGGCCTATGGTCATCT
CAATGCCGAGAGGGATGTGGAGGGCGAGAGAGAGCGACTTCTCTCGGGCCCACAGCCTTACAGCTGTG
+
FFFFFFFFFFFFFFFFFFFFFFFFFFFFFFFFFFFFFFFFFFFFFFFFFFFFFFFFFFFFFFFFFFFFF: FFFFFFFFFFFFFFFFFFFFFFFFFFFFFFFFFFFFFFFFFFFFFFFFFFFFFFFFFFFFFF
FFFFFFFFFFFFFFFFFFFFFFFFFFFFFFFFFFFFFFFFFFFFFFFFFFFFFFFFFFFFFFFFFFFFF: FFFFFFFFFFFFFFFFFFFFFFFFFFFFFFFFFFFFFFFFFFFFFFFFFFFFFFFFFFFFFF
@A00155:342:HHGFNDSXY:1:2209:16134:4257 1:N:0:GAACCTAG+TCCGCATA
TCAATGCCGAGAGGGATGTGGAGGGCGAGAGAGAGCGACTTCTCTCGGGCCCACAGCCTTACAGCTGT
GGAGCACGGTATCCTCTGCCGAAACAGAGGTTTGACAAGACCGGAGGGGTCTCCTAGTTCAAAGGAG
+
FFFFFFFFFFFFFFFFFFFFFFFFFFFFFFFFFFFFFFFFFFFFFFFFFFFFFFFFFFFFFFFFFFFFF: FFFFFFFFFFFFFFFF
FFFFFFFFFFFFFF: FFFFFFFFFFFFFFFF: FFF: FF: FFFFFFFF: FFFFFFFFFFFFFFFF: FFFFFFFF, : FFFFFFFFFFFFFFFF
@A00155:342:HHGFNDSXY:1:2209:26151:6230 1:N:0:GAACCTAG+TCCGCATA
AGAGAGAGCGACTTCTCTCGGGCCCACAGCCTTACAGCTGTGGAGCACGGTATCCTCTGCCGAAACAG
AGGTTTGACAAGACCGGAGGGGTCTCCTGGTTCAAAGGAGATGTACTCCGGGCTTGTTACACGACCTA
+

```

FFFFFFFFFFFFFFFFFFFFFFFFFFFFFFFFFFFFFFFFFFFFFFFFFFFFFFFFFFFFFFFFFFFFFFFF  
FFFFFFFFFFFFFFFFFFFFFFFFFFFFFFFFFFFFFFFFFFFFFFFFFFFFFFFFFFFFFFFFFFFFFFFF:FFFFFFFFFFFFF  
@A00155:342:HHGFNDSXY:1:2209:4996:7044 1:N:0:GAACCTAG+TCCGCATA  
AGCGACTTCTCTCGGGCCCACAGCCTTACAGCTGTGGAGCACGGTATCCTCTGCCGAAACAGAGGTTG  
GACAAGACCGGAGGGGTCTCCTAGTTCCAAAGGAGATGTACTCCGGGCTTGTTACGACCTACC  
+  
FFFFFFFFFFFFFFFFFFFFFFFFFFFFFFFFFFFFFFFFFFFFFFFFFFFFFFFFFFFFFFFFFFFFFFFF  
FFFFFFFFFFFFFFFFFFFFFFFFFFFFFFFFFFFFFFFFFFFFFFFFFFFFFFFFFFFFFFFFFFFFFFFF  
@A00155:342:HHGFNDSXY:1:2209:28628:10989 1:N:0:GAACCTAG+TCCGCATA  
CAATGCCGAGAGGGATGTGGAGGGCGAGAGAGAGCGACTTCTCTCGGGCCCACAGCCTTACAGCTGTG  
GAGCACGGTATCCTCTGCCGAAACAGAGGTTGGACAAGACCGGAGGGGTCTCCTAGTTCCAAAG  
+  
FFFFFFFFFFFFFFFFFFFFFFFFFFFFFFFFFFFFFFFFFFFFFFFFFFFFFFFFFFFFFFFFFFFFFFFF: , FFFFFFFF  
FFFFFFFFFFFFFFFFFFFFFFFFFFFFFFFFFFFFFFFFFFFFFFFFFFFFFFFFFFFFFFFFFFFFFFFF  
@A00155:342:HHGFNDSXY:1:2209:14452:19069 1:N:0:GAACCTAG+TCCGCATA  
CGCTCTCTCTCGCCCTCCACATCCCTCTCGGCATTGAGATGACCATAGGCCAGAGGTGAGTCCTTAAG  
TGGACACAGCTGATCTAAGGCGGTGTGGTGGGGCATGGGTTTGAACCCCATGACGGTCGGAGTCTAG  
+  
FFFFFFFFFFFFFFFFFFFFFFFFFFFFFFFFFFFFFFFFFFFFFFFFFFFFFFFFFFFFFFFFFFFFFFFF  
FFFFFFFFFFFFFFFFFFFFFFFFFFFFFFFFFFFFFFFFFFFFFFFFFFFFFFFFFFFFFFFFFFFFFFFF  
@A00155:342:HHGFNDSXY:1:2209:19443:19319 1:N:0:GAACCTAG+TCCGCATA  
GGATGTGGAGGGCGAGAGAGAGCGACTTCTCTCGGGCCCACAGCCTTACAGCTGTGGAGCACGGTATC  
CTCTGCCGAAACAGAGGTTGGACAAGACCGGAGGGGTCTCCTAGTTCCAAAGGAGATGTACTCC  
+  
FFF:FFFFFFFFFFFFFFFFFFFFFFFFFFFFFFFFFFFFFFFFFFFFFFFFFFFFFFFFFFFFFFFFFFFF  
FFFFFFFFFFFFFFFFFFFFFFFFFFFFFFFFFFFFFFFFFFFFFFFFFFFFFFFFFFFFFFFFFFFFFFFF  
@A00155:342:HHGFNDSXY:1:2209:32154:20635 1:N:0:GAACCTAG+TCCGCATA  
GGATGTGGAGGGCGAGAGAGAGCGACTTCTCTCGGGCCCACAGCCTTACAGCTGTGGAGCACGGTATC  
CTCTGCCGAAACAGAGGTTGGACAAGACCGGAGGGGTCTCCTAGTTCCAAAGGAGATGTACTCC  
+  
FF, FF:FFFFFFFFFFFFFFFFFFFFFFFFFFFFFFFFFFFFFFFFFFFFFFFFFFFFFFFFFFFFFFFF: FF  
FFFFFFFFFFFFFFFFFFFFFFFFFFFFFFFFFFFFFFFFFFFFFFFFFFFFFFFFFFFFFFFFFFFFFFFF: FFFFFFFF  
@A00155:342:HHGFNDSXY:1:2209:12020:23312 1:N:0:GAACCTAG+TCCGCATA  
TGTCCACTTAAGGACTCACCTCTGGCCTATGGTCATCTCAATGCCGAGAGGGATGTGAAGGGCGAGAG  
AGAGCGACTTCTCTCGGGCCCACAGCCTTACAGCTGTGGAGCACGGTATCCTCTGCCGAAACAGAGGT  
+  
FFFFFFFFFFFFFFFFFFFFFFFFFFFFFFFFFFFFFFFFFFFFFFFFFFFFFFFFFFFFFFFFFFFFFFFF  
FFFFFFFFFFFFFFFFFFFFFFFFFFFFFFFFFFFFFFFFFFFFFFFFFFFFFFFFFFFFFFFFFFFFFFFF: FFFFFFFF  
@A00155:342:HHGFNDSXY:1:2210:23204:1564 1:N:0:GAACCTAG+TCCGCATA  
ACCTCTGTTTTCGGCAGAGGATACCGTGCTCCACAGCTGTAAGGCTGTGGGCCCCGAGAGAAGTCGCTCT  
CTCTCGCCCTCCACATCCCTCTCGGCATTGAGATGACCATAGGCCAGAGGAGAGTCCTTAAG  
+  
FFFFFFFFFFFFFFFFFFFFFFFFFFFFFFFFFFFFFFFFFFFFFFFFFFFFFFFFFFFFFFFFFFFFFFFF  
FFFFFFFFFFFFFFFFFFFFFFFFFFFFFFFFFFFFFFFFFFFFFFFFFFFFFFFFFFFFFFFFFFFFFFFF  
@A00155:342:HHGFNDSXY:1:2210:23466:7999 1:N:0:GAACCTAG+TCCGCATA  
CTTCTCTCGGGCCCACAGCCTTACAGCTGTGGAGCACGGTATCCTCTGCCGAAACAGAGGTTGGACAA  
GACCGGAGGGGTTTCTAGTTCCAAAGGAGATGTACTCCGGGCTTGTTACGACCTACCGTGTAAGTC  
+  
FFFFFFFFFFFFFFFFFFFFFFFFFFFFFFFFFFFFFFFFFFFFFFFFFFFFFFFFFFFFFFFFFFFFFFFF  
FFFFFFFFFFFFFFFFFFFFFFFFFFFFFFFFFFFFFFFFFFFFFFFFFFFFFFFFFFFFFFFFFFFFFFFF: FFFFFFFF  
@A00155:342:HHGFNDSXY:1:2210:15582:23281 1:N:0:GAACCTAG+TCCGCATA  
ACCTCTGTTTTCGGCAGAGGATACCGTGCTCCACAGCTGTAAGGCTGTGGGCCCCGAGAGAAGTCGCTCT  
CTCTCGCCCTTACATCCCTCTCGGCATTGAGATGACCATAGGCCAGAGGTGAGTCCTTAAGTGACA  
+

FFFFFFFFFFFFFFFFFFFFFFFFFFFFFFFFFFFFFFFFFFFFFFFFFFFFFFFFFFFFFFFFFFFFFFFF  
FFFFFFFFFFFFFFFF:FFFFFFFFFFFFFFFFFFFFFFFFFFFFFFFFFFFFFFFFFFFFFFFFFFFFFFFF  
@A00155:342:HHGFNDSXY:1:2210:32027:28401 1:N:0:GAACCTAG+TCCGCATA  
CGACTTCTCTCGGGCCACAGCCTTACAGCTGTGGAGCACGGTATCCTCTGCCGAAACAGAGGTTGGA  
CAAGACCGAGGGGTCTCCTAGTTCCAAAGGAGATGTACTCCGGGCTTGTTACGACCTACCGTGTA  
+  
FFFFFFFFFFFFFFFFFFFFFFFFFFFFFFFFFFFFFFFFFFFFFFFFFFFFFFFFFFFFFFFFFFFFFFFF  
FFFFFFFFFFFFFFFFFFFFFFFF,FFFFFFFFFFFFFFFFFFFFFFFFFFFFFFFFFFFFFFFFFFFFFFFF  
@A00155:342:HHGFNDSXY:1:2211:30165:2628 1:N:0:GAACCTAG+TCCGCATA  
GTCCACTTAAGGACTCACCTCTGGCCTATGGTCATCTCAATGCCGAGAGGGATGTGGAGGGCGAGAGA  
GAGCGACTTCTCTCGGGCCACAGCCTTACAGCTGTGGAGCACGGTATCCTCTGCCGAAACAGAGGTT  
+  
FFFFFFFFFFFFFFFFFFFFFFFFFFFFFFFFFFFFFFFFFFFFFFFFFFFFFFFFFFFFFFFFFFFFFFFF  
FFFFFFFFFFFFFFFFFFFFFFFFFFFFFFFFFFFFFFFFFFFFFFFFFFFFFFFFFFFFFFFFFFFFFFFF  
@A00155:342:HHGFNDSXY:1:2211:16568:28432 1:N:0:GAACCTAG+TCCGCATA  
CTTCTCTCGGGCCACAGCCTTACAGCTGTGGAGCACGGTATCCTCTGCCGAAACAGAGGTTGACAA  
GACCGGAGGGGTCTCCTAGTTCCAAAGGAGATGTACTCCGACTTGTTACGACCTACCGTGTAAGTC  
+  
FFFFFFFFFFFFFFFFFFFFFFFFFFFFFFFFFFFFFFFFFFFFFFFFFFFFFFFFFFFFFFFFFFFFFFFF  
FFFFFFFFFFFFFFFFFFFFFFFFFFFFFFFFFFFFFFFFFFFFFFFFFFFFFFFFFFFFFFFFFFFFFFFF  
@A00155:342:HHGFNDSXY:1:2211:16975:32017 1:N:0:GAACCTAG+TCCGCATA  
GAGAGGGATGTGGAGGGCGAGAGAGAGCGACTTCTCTCGGGCCACAGCCTTACAGCTGTGGAGCACG  
GTATCCTCTGCCGAAACAGAGGTTGGACAAGACCGGAAGGGTCTCCTAGTTCCAAAGGAGATGTACTC  
+  
FFFFFFFFFFFFFFFFFFFFFFFFFFFFFFFFFFFFFFFFFFFFFFFFFFFFFFFFFFFFFFFFFFFFFFFF  
FFFFFFFFFFFFFFFFFFFFFFFFFFFFFFFFFFFFFFFFFFFFFFFFFFFFFFFFFFFFFFFFFFFFFFFF  
@A00155:342:HHGFNDSXY:1:2212:19687:22153 1:N:0:GAACCTAG+TCCGCATA  
CCTTACAGCTGTGGAGCACGGTATCCTCTGCCGAAACAGAGGTTGGACAAGACCGGAGGGGTCTCCTG  
GTTCCAAAGGAGATGTACTCCGGGCTTGTTACGACCTACCGTGTAAGTCGTAGTCTAGTAGGCTACC  
+  
FFFFFFFFFFFFFFFFFFFFFFFFFFFFFFFFFFFFFFFFFFFFFFFFFFFFFFFFFFFFFFFFFFFFFFFF  
FFFFFFFFFFFFFFFFFFFFFFFFFFFFFFFFFFFFFFFFFFFFFFFFFFFFFFFFFFFFFFFFFFFFFFFF  
@A00155:342:HHGFNDSXY:1:2212:18231:30499 1:N:0:GAACCTAG+TCCGCATA  
TTACACGGTAGGTCTGAACAAGCCCGGAGTACATCTCCTTTGGAAGTACAGACCCCTCCGGTCTTG  
TCCAACCTCTGTTTCGGCAGAGGATACCGTGCTCCACAGCTGTAAGGCTGTGGGCCCAGAGAAAGTCG  
+  
FFFFFFFFFFFFFFFFFFFFFFFFFFFFFFFFFFFFFFFFFFFFFFFFFFFFFFFFFFFFFFFFFFFFFFFF  
FFFFFFFFFFFF:FFFFFFFFFFFFFFFFFFFFFFFFFFFFFFFFFFFFFFFFFFFFFFFFFFFFFFFFFFFF  
@A00155:342:HHGFNDSXY:1:2212:16107:34679 1:N:0:GAACCTAG+TCCGCATA  
GAGCGACTTCTCTCGGGCCACAGCCTTACAGCTGTGGAGCACGGTATCCTCTGCCGAAACAGAGGTT  
GGACAAGACCGGAGGGGTCTCCTAGTTCCAAAGGAGATGTACTCCGGGCTTGTTACGACCTACCG  
+  
FFFFFFFFFFFFFFFFFFFFFFFFFFFFFFFFFFFFFFFFFFFFFFFFFFFFFFFFFFFFFFFFFFFFFFFF  
FFFFFFFFFFFFFFFFFFFFFFFF:F:FFFFFFFFFFFFFFFFFFFFFFFFFFFFFFFFFFFFFFFFFFFFF  
@A00155:342:HHGFNDSXY:1:2213:20066:12414 1:N:0:GAACCTAG+TCCGCATA  
GACTTCTCTCGGGCCACAGCCTTACAGCTGTGGAGCACGGTATCCTCTGCCGAAACAGAGGTTGGAC  
AAGACCGGAGGGGTCTCCTAGTTCCAAAGGAGATGTACTCCGGGCTTGTTACGACCTACCGTGTAAG  
+  
FFFFFFFFFFFFFFFFFFFFFFFFFFFFFFFFFFFFFFFFFFFFFFFFFFFFFFFFFFFFFFFFFFFFFFFF  
FF:FFFFFFFFFFFF:FFFFFFFFFFFFFFFFFFFFFFFFFFFFFFFFFFFFFFFFFFFFFFFFFFFFFFF  
@A00155:342:HHGFNDSXY:1:2214:11116:25441 1:N:0:GAACCTAG+TCCGCATA  
ATCTCAATGCCGAGAGGGATGTAGAGGGCGAGAGAGAGCGACTTCTCTCGGGCCACAGCCTTACAGC  
TGTGGAGCACGGTATCCTCTGCCGAAACAGAGGTTGGACAAGACCGGAGGGGTCTCCTAGTTCCAAAG  
+

FFFFFFFFFFFFFFFFFFFFFFFFFFFFFFFFFFFFFFFFFFFFFFFFFFFFFFFFFFFFFFFFFFFFF  
FFFFFFFFFFFFFFFFFFFFFFFFFFFFFFFFFFFFFFFFFFFFFFFFFFFFFFFFFFFFFFFFFFFFF  
@A00155:342:HHGFNDSXY:1:2214:15157:25457 1:N:0:GAACCTAG+TCCGCATA  
AGATCAGCTGTGTCCACTTAAGGACTCACCTCTGGCCTATGGTCATCTCAATGCCGAGAGGGATGTGA  
AGGGCGAGAGAGAGCGACTTCTCTCGGGCCCACAGCCTTACAGCTGTGGAGCACGGTATCCTCTGCCG  
+  
FFFFFFFFFFFFFFFFFFFFFFFFFFFFFFFFFFFFFFFFFFFFFFFFFFFFFFFFFFFFFFFFFFFFF,FFF  
FFFFFFFFFFFFFFFFFFFFFFFFFFFFFFFFFFFFFFFFFFFFFFFFFFFFFFFFFFFFFFFFFFFFF,FFFFFFF  
@A00155:342:HHGFNDSXY:1:2214:27236:25676 1:N:0:GAACCTAG+TCCGCATA  
CACAGCCTTACAGCTGTGGAGCACGGTATCCTCTGCCGAAACAGAGGTTGGACAAGACCGGAGGGGT  
TCCTAGTTCCAAGGAGATGTACTCCGGGCTTGTTACAGACCTACCGTGTAAGTCGTAGTCTAGTAGG  
+  
FFFFFFF:FFFFFFFFFFFFFFFFFFFFFFFFFFFFFFFFFFFFFFFFFFFFFFFFFFFFFFFFFFFFF  
FFFFFFFFFFFFFFFFFFFFFFFFFFFFFFFFFFFFFFFFFFFFFFFFFFFFFFFFFFFFFFFFFFFFF:FFFF  
@A00155:342:HHGFNDSXY:1:2214:2067:30499 1:N:0:GAACCTAG+TCCGCATA  
GGACTCACCTCTGGCCTATGGTCATCTCAATGCCGAGAGGGATGTGGAGGGCGAGAGAGAGCGACTTC  
TCTCGGGCCCACAGCCTTACAGCTGTGGAGCACGGTATCCTCTGCCGAAACAGAGGTTGGACAAGACC  
+  
FFFFFFFFFFFFFFFFFFFFFFFFFFFFFFFFFFFFFFFFFFFFFFFFFFFFFFFFFFFFFFFFFFFFF  
FFFFFFFFFFFFFFFFFFFFFFFFFFFFFFFFFFFFFFFFFFFFFFFFFFFFFFFFFFFFFFFFFFFFF  
@A00155:342:HHGFNDSXY:1:2215:25807:3724 1:N:0:GAACCTAG+TCCGCATA  
ACCGTGCTCCACAGCTGTAAGGCTGTGGGCCCGAGAGAAGTCGCTCTCTCTCGCCCTCCACATCCCTC  
TCGGCATTGAGATGACCATAGGCCAGAGGTGAGTCCTTAAGTGGACACAGCTGATCTAAGGCGGTGTG  
+  
FFFFFFFFFFFFFFFFFFFFFFFFFF:FF,FFFFF,FFFFFFFFFFFFFFFFFFFFFFFFFF:FF:FF:F:FF:FFFF  
FF:FFF:FFFFFFFFFFFF:FF,FFFFFFFFFFFFFFFFFFFFFFFF,F,FFFFFFFFFFFFFFFFFFFF:FFFF,F  
@A00155:342:HHGFNDSXY:1:2215:5656:10974 1:N:0:GAACCTAG+TCCGCATA  
ACCTCTGTTTCGGCAGAGGATACCGTGCTCCACAGCTGTAAGGCTGTGGGCCCGAGAGAAGTCGCTCT  
CTCTCGCCCTTACATCCCTCTCGGCATTGAGATGACCATAGGCCAGAGGTGAGTCCTTAAGTGGACA  
+  
FFFFFFFFFFFFFFFFFFFFFFFFFFFFFFFFFFFFFFFFFFFFFFFFFFFFFFFFFFFFFFFFFFFFF,FFFFFFFFFFFFFFFFFFFFFFFFFFFFF  
FFFFFFFFFFFFFFFFFFFFFFFFFFFFFFFFFFFFFFFFFFFFFFFFFFFFFFFFFFFFFFFFFFFFF,FFFFFFFF:FFF:FFF:,F  
@A00155:342:HHGFNDSXY:1:2215:5710:21308 1:N:0:GAACCTAG+TCCGCATA  
GGATGTGGAGGGCGAGAGAGAGCGACTTCTCTCGGGCCCACAGCCTTACAGCTGTGGAGCACGGTATC  
CTCTGCCGAAACAGAGGTTGGACAAGACCGGAGGGGTCTCCTAGTTCCAAGGAGATGTACTCC  
+  
FFFFFFFFFFFFFFFFFFFFFFFFFFFFFFFFFFFFFFFFFFFFFFFFFFFFFFFFFFFFFFFFFFFFF  
FFFFFFFFFFFFFFFFFFFFFFFFFFFFFFFFFFFFFFFFFFFF:FFFFFFFFF:FFF,FFFFFFFFFFFFFFFF  
@A00155:342:HHGFNDSXY:1:2215:5186:27696 1:N:0:GAACCTAG+TCCGCATA  
TCGGCAGAGGATACCGTGCTCCACAGCTGTAAGGCTGTGGGCCCGAGAGAAGTCGCTCTCTCTCGCCC  
TTCACATCCCTCTCGGCATTGAGATGACCATAGGCCAGAGGTGAGTCCTTAAGTGGACACA  
+  
FFFFFFF,:FFFF:FFFFFF:FFF,FFFFFFFFF:FFFFFFF,FFFF:FFFFFFFFFFFFFFFFFFFF,  
FFFFFFFFFFFFFFFFFFFF,FFFFFFFFFFFFFFFFF:FFFFFFFFFFFF:FFFFFFFFFFFFFFFF  
@A00155:342:HHGFNDSXY:1:2215:16315:34851 1:N:0:GAACCTAG+TCCGCATA  
GGATGTGGAGGGCGAGAGAGAGCGACTTCTCTCGGGCCCACAGCCTTACAGCTGTGGAGCACGGTATC  
CTCTGCCGAAACAGAGGTTGGACAAGACCGGAGGGGTCTCCTAGTTCCAAGGAGATGTACTCC  
+  
FFFFFFFFFFFFFFFFFFFFFFFFFFFFFFFFFFFFFFFFFFFFFFFFFFFFFFFFFFFFFFFFFFFFF:FFFFFFFFFFFFFFFFFFFF  
FFFFFFFFFFFFFFFFFFFF:FFFFFFFFFFFFFFFFFFFFFFFFFFFFFFFFFFFFFFFFFFFFFFFFFFFFF  
@A00155:342:HHGFNDSXY:1:2216:20066:3082 1:N:0:GAACCTAG+TCCGCATA  
CTTCTCTCGGGCCCACAGCCTTACAGCTGTGGAGCACGGTATCCTCTGCCGAAACAGAGGTTGGACAA  
GACCGGAGGGGTCTCCTAGTTCCAAGGAGATGTACTCCGGGCTTGTTACAGACCTACCGTGTAAGTC



FFFFFFFFFFFFFFFFFFFFFFFFFFFFFFFFFFFFFFFFFFFFFFFFFFFFFFFFFFFFFFFFFFFFFFFFFFFFFFFF  
FFFFFFFFFFFFFFFFFFFFFFFFFFFFFFFFFFFFFFFFFFFFFFFFFFFFFFFFFFFFFFFFFFFFFFFFFFFFFFFF:FFF  
@A00155:342:HHGFNDSXY:1:2216:9263:7795 1:N:0:GAACCTAG+TCCGCATA  
CTTCTCTCGGGCCCACAGCCTTACAGCTGTGGAGCACGGTATCCTCTGCCGAAACAGAGGTTGGACAA  
GACCGGTGGGGTCTCCTAGTTCCAAAGGAGATGTACTCCGGGCTTGTTACGACCTACCGTGTAAGTC  
+  
FFFFFFFFFFFFFFFFFFFFFFFFFFFFFFFFFFFFFFFFFFFFFFFFFFFFFFFFFFFFFFFFFFFFFFFFFFFFFFFF  
FFFFFFFFFFFFFFFFFFFFFFFFFFFFFFFFFFFFFFFFFFFFFFFFFFFFFFFFFFFFFFFFFFFFFFFFFFFFFFFF  
@A00155:342:HHGFNDSXY:1:2216:32072:28541 1:N:0:GAACCTAG+TCCGCATA  
ACCTCTGTTTCGGCAGAGGATACCGTGCTCCACAGCTGTAAGGCTGTGGGCCCCGAGAGAAGTCGCTCT  
CTCTCGCCCTCCACATCCCTCTCGGCATTGAGATGACCATAGGCCAGAGGAGAGTCCTTAAG  
+  
FFFFFFFFFFFFFFFFFFFFFFFFFFFFFFFFFFFFFFFFFFFFFFFFFFFFFFFFFFFFFFFFFFFFFFFFFFFFFFFF  
FFFFFFFFFFFFFFFFFFFFFFFFFFFFFFFFFFFFFFFFFFFFFFFFFFFFFFFFFFFFFFFFFFFFFFFFFFFFFFFF  
@A00155:342:HHGFNDSXY:1:2217:1542:6042 1:N:0:GAACCTAG+TCCGCATA  
ACCTCTGTTTCGGCAGAGGATACCGTGCTCCACAGCTGTAAGGCTGTGGGCCCCGAGAGAAGTCGCTCT  
CTCTCGCCCTCCACATCCCTCTCGGCATTGAGATGACCATAGGCCAGAGGTGAGTCCTTAAGTGGACA  
+  
F:FFFFFFFFFFFFFFFFFFFFFFFFFFFFFFFFFFFFFFFFFFFFFFFFFFFFFFFFFFFFFFFFFFFFFFFFFFFF  
FFFFFF:FFF:FFF:FFF,F,FFFFFF:,FFFFFF:FF:FFFFFF:FFF:FFFFFFFF:FFFF,,F,FF  
@A00155:342:HHGFNDSXY:1:2217:7220:13870 1:N:0:GAACCTAG+TCCGCATA  
CTCTGGCCTATGGTCATCTCAATGCCGAGAGGGATGTGGAGGGCGAGAGAGAGCGACTTCTCTCGGGC  
CCACAGCCTTACAGCTGTGGAGCACGGTATCCTCTGCCGAAACAGAGGTTGGACAAGACCGGAGGGGT  
+  
FFF:FFFFF,FFFFFFFFFFFFFFFFFFFFFFFFFFFFFFFFFFFFFFFFFFFFFFFFFFFFFFFFFFFFFFFFFFFF  
FFFFFF:FFFFFFFFFFFFFFFFFFFFFFFFFFFFFFFFFFFFFFFFFFFFFFFFFFFFFFFFFFFFFFFFFFFF:FF  
@A00155:342:HHGFNDSXY:1:2217:12988:13996 1:N:0:GAACCTAG+TCCGCATA  
GGATGTGGAGGGCGAGAGAGAGCGACTTCTCTCGGGCCCACAGCCTTACAGCTGTGGAGCACGGTATC  
CTCTGCCGAAACAGAGGTTGGACAAGACCGGAGGGGTCTCCTAGGTCCAAAGGAGATGTACTCC  
+  
FFFFFFFFFFFFFFFFFFFFFFFFFFFFFFFFFFFFFFFFFFFFFFFFFFFFFFFFFFFFFFFFFFFFFFFFFFFFFFFF  
FFFFFFFFFFFFFFFFFFFFFFFFFFFFFFFFFFFFFFFFFFFFFFFFFFFFFFFFFFFFFFFFFFFFFFFFFFFFFFFF  
@A00155:342:HHGFNDSXY:1:2217:7401:15436 1:N:0:GAACCTAG+TCCGCATA  
GTATCCTCTGCCGAAACAGAGGTTGGACAAGACCGGAGGGGTCTCCTAGTTCCAAAGGAGATGTACTC  
CGGGCTTGTTACGACCTACCGTGTAAGTCGTAGTCTAGTAGGCTACCTGACGAGTCCTTTTATAGGAC  
+  
FF:FFFFFFFFFFFFFFFFFFFFFFFFFFFFFFFFFFFFFFFFFFFFFFFFFFFFFFFFFFFFFFFFFFFFFFFFFFFF  
FFFFFFFFFFFFFFFFFFFFFFFFFFFFFFFFFFFFFFFFFFFFFFFFFFFFFFFFFFFFFFFFFFFFFFFFFFFF,FFFFFFFFFFFFFFFFFFFF:FF  
@A00155:342:HHGFNDSXY:1:2217:30481:20619 1:N:0:GAACCTAG+TCCGCATA  
TCCTCTGCCGAAACAGAGGTTGGACAAGACCGGAGGGGTCTCCTAGTTCCAAAGGAGATGTACTCCGG  
GCTTGTTACGACCTACCGTGTAAGTCGTAGTCTAGTAGGCTACCTGACGAGTCCTTTTATAGGACGAA  
+  
FFFFFFFFFFFFFFFFFFFFFFFFFFFFFFFFFFFFFFFFFFFFFFFFFFFFFFFFFFFFFFFFFFFFFFFFFFFFFFFF  
F:FFFFFFFFFFFFFFFFFFFFFFFFFFFFFFFFFFFFFFFFFFFFFFFFFFFFFFFFFFFFFFFFFFFFFFFFFFFF  
@A00155:342:HHGFNDSXY:1:2217:27651:21261 1:N:0:GAACCTAG+TCCGCATA  
GAGAGAGCGACTTCTCTCGGGCCCACAGCCTTACAGCTGTGGAGCACGGTATCCTCTGCCGAAACAGA  
GGTTGGACAAGACCGGAGGGGTCTCCTAGTTCCAAAGGAGATGTACTCCGGGCTTGTT  
+  
FFFFFFFFFFFFFFFFFFFFFFFFFFFFFFFFFFFFFFFFFFFFFFFFFFFFFFFFFFFFFFFFFFFFFFFFFFFFFFFF  
FFFFFFFFFFFFFFFFFFFFFFFFFFFFFFFFFFFFFFFFFFFFFFFFFFFFFFFFFFFFFFFFFFFFFFFFFFFFFFFF  
@A00155:342:HHGFNDSXY:1:2217:10285:28040 1:N:0:GAACCTAG+TCCGCATA  
TTCTCTCGGGCCCACAGCCTTACAGCTGTGGAGCACGGTATCCTCTGCCGAAACAGAGGTTGGACAAG  
ACCGGAGGGGTCTCCTAGTTCCAAAGGAGATGTACTCCGGGCTTGTTACGACCTACCGTGTAAGTCG  
+

FFFFFFFFFFFFFFFFFFFFFFFFFFFFFFFFFFFFFFFFFFFFFFFFFFFFFFFFFFFFFFFFFFFFFFFF  
FFFFFFFFFFFFFFFF:FFFFFFFFFFFFFFFFFFFFFFFFFFFFFFFFFFFFFFFFFFFFFFFFFFFFFFFF  
@A00155:342:HHGFNDSXY:1:2217:20383:33912 1:N:0:GAACCTAG+TCCGCATA  
GAGAGAGCGACTTCTCTCGGGCCACAGCCTTACAGCTGTGGAGCACGGTATCCTCTGCCGAAACAGA  
GGTTGGACAAGACCGGAGGGGTCTCCTAGTTCCAAAGGAGATGTACTCCGGGCTTGTTCACGACCTAC  
+  
FFFFFFFFFFFFFFFFFFFFFFFFFFFFFFFFFFFFFFFFFFFFFFFFFFFFFFFFFFFFFFFFFFFFFFFF  
FFFFFFFFFFFFFFFF:FFFFFFFFFFFFFFFFFFFFFFFFFFFFFFFFFFFFFFFFFFFFFFFFFFFFFFFF  
@A00155:342:HHGFNDSXY:1:2217:26729:35196 1:N:0:GAACCTAG+TCCGCATA  
TCAATGCCGAGAGGGATGTAGAGGGCGAGAGAGAGCGACTTCTCTCGGGCCACAGCCTTACAGCTGT  
GGAGCACGGTATCCTCTGCCGAAACAGAGGTTGGACAAGACCGGAGGGGTCTCCTAGTTCCAAAGGAG  
+  
FFFFFFFFFFFFFFFFFFFFFFFFFFFFFFFFFFFFFFFFFFFFFFFFFFFFFFFFFFFFFFFFFFFFFFFF:FFFFFFFF  
FFFFFFFFFFFFFFFF:FFFFFFFFFFFFFFFFFFFFFFFFFFFFFFFFFFFFFFFFFFFFFFFFFFFFFFFF  
@A00155:342:HHGFNDSXY:1:2218:24252:9737 1:N:0:GAACCTAG+TCCGCATA  
ATCTCAATGCCGAGAGGGATGTAGAGGGCGAGAGAGAGCGACTTCTCTCGGGCCACAGCCTTACAGC  
TGTGGAGCACGGTATCCTCTGCCGAAACAGAGGTTGGACAAGACCGGAGGGGTCTCCTAGTTCCAAAG  
+  
FFFFFFFFFFFFFFFFFFFFFFFFFFFFFFFFFFFFFFFFFFFFFFFFFFFFFFFFFFFFFFFFFFFFFFFF  
FFFFFFFFFFFFFFFF:FFFFFFFFFFFFFFFFFFFFFFFFFFFFFFFFFFFFFFFFFFFFFFFFFFFFFFFF  
@A00155:342:HHGFNDSXY:1:2218:4209:13291 1:N:0:GAACCTAG+TCCGCATA  
CTCAATGCCGAGAGGGATGTGGAGGGCGAGAGAGAGCGACTTCTCTCGGGCCACAGCCTTACAGCTG  
TGGAGCACGGTATCCTCTGCCGAAACAGAGGTTGGACAAGACCGGAGGGGTCTCCTAGTTCCAAAGGA  
+  
FFFFFFFFFFFFF,:FF::,F,FFFFF:FFFFFFFFFFFFFFFFFFFF,FFFFFFFFF,FFFFFFF::FFF:FFF  
,FFFFFF:FFFF,FFFFFF:F:F:F:FFFFFFFFFFFFFFFFFFFFFFFFFFFFFFFFFFFF:FFF:FFFFFFFFF,F  
@A00155:342:HHGFNDSXY:1:2218:8260:16391 1:N:0:GAACCTAG+TCCGCATA  
AAGGACTCACCTCTGGCCCATGGTCATCTCAATGCCGAGAGGGATGTGGAGGGCGAGAGAGAGCGACT  
TCTCTCGGGCCACAGCCTTACAGCTGTGGAGCACGGTATCCTCTGCCGAAACAGAGGTTGGACAAGA  
+  
FFFFFFFFFFFFFFF,FF:FFFFFFFFFFFFFFFFFFFFFFFFFFFFFFFFFFFFFFFFFFFFFFFF:FFFFFFFFF:FFFFFFFFF  
:FFFFFFFFFFFFFFFFFFFF:F:FFFFFFFFFFFFF,FFF:FFFFFFFFFFFFFFFF:FFFFFFFFF:FFFF:FF  
@A00155:342:HHGFNDSXY:1:2219:17481:3239 1:N:0:GAACCTAG+TCCGCATA  
GGGCGAGAGAGAGCGACTTCTCTCGGGCCACAGCCTTACAGCTGTGGAGCACGGTATCCTCTGCCGA  
AACAGAGGTTGGACAAGACCGGAGGGGTCTCCTAGTTCCAAAGGAGATGTACTCCGGGCTTGTTCACG  
+  
FFFFFFF:F:FFFFF:FFF,F,,FFFF,FFFFFFFFF:FFF:FFFFFFFFFFFFFFFF:FFFFFFFFF::FFF  
FFFFFFF:,FFFFFFFFFFFF:FFFFFF:F,FFFFFFFFFFFFFFFFFFFFF,:FFFFFFFFFFFFFFFFFFFFF:  
@A00155:342:HHGFNDSXY:1:2219:23972:23844 1:N:0:GAACCTAG+TCCGCATA  
GGATGTGGAGGGCGAGAGAGAGCGACTTCTCTCGGGCCACAGCCTTACAGCTGTGGAGCACGGTATC  
CTCTGCCGAAACAGAGGTTGGACAAGACCGGAGGGGTCTCCTAGTTCCAAAGGAGATGTACTCC  
+  
FFFFFFFFFFFFFFFFFFFFFFFFFFFFFFFFFFFFFFFFFFFFFFFFFFFFFFFFFFFFFFFFFFFFFFFF  
FFFFFFFFFFFFFFFF:FFFFFFFFFFFFFFFFFFFFFFFFFFFFFFFFFFFFFFFFFFFFFFFF  
@A00155:342:HHGFNDSXY:1:2219:4309:26960 1:N:0:GAACCTAG+TCCGCATA  
ACCTACCGTGTAAGTCGTAGTCTAGTAGGCTACCTGACGAGTCCTTTTAGGACGAACTTACACAAC  
TCGAAGAGTAACGACGGTTTCGTCTTGAACGGACTCATCAGGGAGCCTACTAGACTCCGACCGTCA  
+  
FFFFFFFFFFFFFFFFFFFFFFFFF:F:FFFFFFFFFFFFFFFFFFFFFFFF:FFFFFFFFF:F,FFFF:FFFFFFFFF  
:FFFFFFF:FFFFFFFFFFFFF:F:FFFFFFF:,FFF,FFFFFFFFF:F,FFFFFFFFF:FFFF:FFF  
@A00155:342:HHGFNDSXY:1:2219:4689:33943 1:N:0:GAACCTAG+TCCGCATA  
GATGTGGAGGGCGAGAGAGAGCGACTTCTCTCGGGCCACAGCCTTACAAGTGTGGAGCACGGTATCC  
TCTGCCGAAACAGAGGTTGGACAAGACCGGAGGGGTCTCCTAGTTCCAAAGGAGATGTACTCCGGGCT  
+

FFFFFFFFFFFFFFFFFFFFFFFFFFFFFFFFFFFFFFFFFFFFFFFFFFFFFFFFFFFFFFFFFFFFFFFF  
FFFFFFFFFFFFFFFFFFFFFFFFFFFFFFFFFFFFFFFFFFFFFFFFFFFFFFFFFFFFFFFFFFFFFFFF  
@A00155:342:HHGFNDSXY:1:2220:21441:4085 1:N:0:GAACCTAG+TCCGCATA  
AAAGACTCACCTCTGGCCTATGGTCATCTCAATGCCGAGAGGGATGTGGAGGGCGAGAGAGAGCGACT  
TCTCTCGGGCCCACAGCCTTACAGCTGTGGAGCACGGTATCCTCTGCCGAAACAGAGGTTGGAC  
+  
FFFFFFFFFFFFFFFFFFFFFFFFFFFFFFFFFFFFFFFFFFFFFFFFFFFFFFFFFFFFFFFFFFFFFFFF  
FFFFFFFFFFFFFFFFFFFFFFFFFFFFFFFFFFFFFFFFFFFFFFFFFFFFFFFFFFFFFFFFFFFFFFFF  
@A00155:342:HHGFNDSXY:1:2220:1542:26271 1:N:0:GAACCTAG+TCCGCATA  
ATGCCGAGAGGGATGTGGAGGGCGAGAGAGAGCGACTTCTCTCGGGCCCACAGCCTTACAGCTGTGGA  
GCACGGTATCCTCTGCCGAAACAGAGGTTGGACAAGACCGGAGGGGTCTCCTAGTTCCAAAGGAGATG  
+  
FFFFFFFFFFFFFFFFFFFFFFFFFFFFFFFFFFFFFFFFFFFFFFFFFFFFFFFFFFFFFFFFFFFFFFFF  
FFFFFFFFFFFFFFFFFFFFFFFFFFFFFFFFFFFFFFFFFFFFFFFFFFFFFFFFFFFFFFFFFFFFFFFF  
@A00155:342:HHGFNDSXY:1:2220:20482:29982 1:N:0:GAACCTAG+TCCGCATA  
GAGCGACTTCTCTCGGGCCCACAGCCTTACAGCTGTGGAGCACGGTATCCTCTGCCGAAACAGAGGTT  
GGACAAGACCGGAGGGGTCTCCTGGTTCCAAAGGAGATGTACTCCGGGCTTGTTACAGACCTACCGTG  
+  
FFFFFFFFFFFFFFFFFFFFFFFFFFFFFFFFFFFFFFFFFFFFFFFFFFFFFFFFFFFFFFFFFFFFFFFF  
FFFFFFFFFFFFFFFFFFFFFFFFFFFFFFFFFFFFFFFFFFFFFFFFFFFFFFFFFFFFFFFFFFFFFFFF  
@A00155:342:HHGFNDSXY:1:2220:16532:36636 1:N:0:GAACCTAG+TCCGCATA  
ATGCCGAGAGGGATGTGGAGGGCGAGAGAGAGCGACTTCTCTCGGGCCCACAGCCTTACAGCTGTGGA  
GCACGGTATCCTCTGCCGAAACAGAGGTTGGACAAGACCGGAGGGGTCTCCTGGTTCCAAAGGAGATG  
+  
FFFFFFFFFFFFFFFFFFFFFFFFFFFFFFFFFFFFFFFFFFFFFFFFFFFFFFFFFFFFFFFFFFFFFFFF  
FFFFFFFFFFFFFFFFFFFFFFFFFFFFFFFFFFFFFFFFFFFFFFFFFFFFFFFFFFFFFFFFFFFFFFFF  
@A00155:342:HHGFNDSXY:1:2221:12852:3082 1:N:0:GAACCTAG+TCCGCATA  
CTTCTCTCGGGCCCACAGCCTTACAGCTGTGGAGCACGGTATCCTCTGCCGAAACAGAGGTTGGACAA  
GACCGGAGGGGTCTCCTGGTTCCAAAGGAGATGTACTCCGGGCTTGTTACAGACCTACCGTGTAAGTC  
+  
FFFFFFFFF:FFFFFFFF:FF:FFFFFFFFFFFFFFFF:FFFFFFFFF:FFFFFFFFFFFFFFFFFFFF  
FFF:,FFF,:FFFFFFFF:F:FFFFFF:FFFFFF,FFFF,:F:FFFFFFFF:F:FFF:,FF,FFF,FFF  
@A00155:342:HHGFNDSXY:1:2221:18602:7999 1:N:0:GAACCTAG+TCCGCATA  
ATGCCGAGAGGGATGTAGAGGGCGAGAGAGAGCGACTTCTCTCGGGCCCACAGCCTTACAGCTGTGGA  
GCACGGTATCCTCTGCCGAAACAGAGGTTGGACAAGACCGGAGGGGTCTCCTAGTTCCAAAGGAGATG  
+  
FFFFFFFFFFFFFFFFFFFFFFFFFFFFFFFFFFFFFFFFFFFFFFFFFFFFFFFFFFFFFFFFFFFFFFFF  
FFFFFFFFFFFFFFFFFFFFFFFFFFFFFFFFFFFFFFFFFFFFFFFFFFFFFFFFFFFFFFFFFFFFFFFF  
@A00155:342:HHGFNDSXY:1:2221:4435:9518 1:N:0:GAACCTAG+TCCGCATA  
GAGAGAGCGACTTCTCTCGGGCCCACAGCCTTACAGCTGTGGAGCACGGTATCCTCTGCCGAAACAGA  
GGTTGGACAAGACCGGAGGGGTCTCCTGGTTCCAAAGGAGATGTACTCCGGGCTTGTTCA  
+  
FFFFFFFFFFFFFFFFFFFFFFFFFFFFFFFFFFFFFFFFFFFFFFFFFFFFFFFFFFFFFFFFFFFFFFFF  
FFFFFFFFFFFFF:FFFFFFFFFFFFFFFFFFFFFFFF:FFFFFFFFFFFFFFFFFFFFFFFFFFFF  
@A00155:342:HHGFNDSXY:1:2221:30011:15045 1:N:0:GAACCTAG+TCCGCATA  
GAGGGCGAGAGAGAGCGACTTCTCTCGGGCCCACAGCCTTACAGCTGTGGAGCACGGTATCCTCTGCC  
GAAACAGAGGTTGGACAAGACCGGAGGGGTCTCCTAGTTCCAAAGGAGATGTACTCCGGGCTTGTTCA  
+  
FFFFFFFFFFFFFFFFFFFFFFFFFFFFFFFFFFFFFFFFFFFFFFFFFFFFFFFFFFFFFFFFFFFFFFFF  
FFFF:F:FFFFFFFFFFFFFFFFFFFFFFFFFFFFFFFF:FFFFFFFFFFFFFFFFFFFFFFFFFFFF  
@A00155:342:HHGFNDSXY:1:2221:28962:16016 1:N:0:GAACCTAG+TCCGCATA  
GAGGGCGAGAGAGAGCGACTTCTCTCGGGCCCACAGCCTTACAGCTGTGGAGCACGGTATCCTCTGCC  
GAAACAGAGGTTGGACAAGACCGGAGGGGTCTCCTAGTTCCAAAGGAGATGTACTCCGGGCTTGTTCA  
+

FFFFFFFFFFFFFFFFFFFFFFFFFFFFFFFFFFFFFFFFFFFFFFFFFFFFFFFFFFFFFFFFFFFFFFFF  
FFFFFFFFFFFFFFFFFFFFFFFFFFFFFFFFFFFFFFFFFFFFFFFFFFFFFFFFFFFFFFFFFFFFFFFF  
@A00155:342:HHGFNDSXY:1:2222:17635:15186 1:N:0:GAACCTAG+TCCGCATA  
AAGGACTCTCCTCTGGCCTATGGTCATCTCAATGCCGAGAGGGATGTGGAGGGCGAGAGAGAGCGACT  
TCTCTCGGGCCACAGCCTTACAGCTGTGGAGCACGGTATCCTCTGCCGAAACAGAGGTTGGACAAGA  
+  
FFFFFFFFFFFFFFFFFFFFFFFFFFFFFFFFFFFFFFFFFFFFFFFFFFFFFFFFFFFFFFFFFFFFFFFF  
FFFFFFFFFFFFFFFFFFFFFFFFFFFFFFFFFFFFFFFFFFFFFFFFFFFFFFFFFFFFFFFFFFFFFFFF:FF  
@A00155:342:HHGFNDSXY:1:2222:20980:21668 1:N:0:GAACCTAG+TCCGCATA  
GCGAGAGAGAGCGACTTCTCTCGGGCCACAGCCTTACAGCTGTGGAGCACGGTATCCTCTGCCGAAA  
CAGAGGTTGGACAAGACCGGAGGGGTCTCCTGGTTCCAAAGGAGATGTACTCCGGGCTTGTTACACGAC  
+  
FFFFFFFFFFFFFFFFFFFFFFFFFFFFFFFFFFFFFFFFFFFFFFFFFFFFFFFFFFFFFFFFFFFFFFFF  
FFFFFFFFFFFFFFFFFFFFFFFFFFFFFFFFFFFFFFFFFFFFFFFFFFFFFFFFFFFFFFFFFFFFFFFF:FF  
@A00155:342:HHGFNDSXY:1:2222:7600:28119 1:N:0:GAACCTAG+TCCGCATA  
GGATGTGGAGGGCGAGAGAGAGCGACTTCTCTCGGGCCACAGCCTTACAGCTGTGGAGCACGGTATC  
CTCTGCCGAAACAGAGGTTGGACAAGACCGGAGGGGTCTCCTGGTTCCAAAGGAGATGTACTCC  
+  
FFFFFFFFFFFFFF:FFFFFFFFFFFFFF:FFFF:FFFFFFFFFFFFFFFFFFFFFFFFFFFFFFFFFFFF  
FFFFFFFFFFFF:FFFFFFFFFFFFFFFFFFFF:FFFFFFFFFFFFFFFFFFFFFFFFFFFFFFFFFFFF  
@A00155:342:HHGFNDSXY:1:2222:19180:30608 1:N:0:GAACCTAG+TCCGCATA  
AAGGACTCTCCTCTGGCCTATGGTCATCTCAATGCCGAGAGGGATGTGGAGGGCGAGAGAGAGCGACT  
TCTCTCGGGCCACAGCCTTACAGCTGTGGAGCACGGTATCCTCTGCCGAAACAGAGGTTGGACAAGA  
+  
FFFFFFFFFFFFFFFFFFFFFFFFFFFFFFFFFFFFFFFFFFFFFFFFFFFFFFFFFFFFFFFFFFFF:FFFFFFFFFFFFFFFFFFFFFFFFFFFF  
FFFFFFFFFFFFFFFFFFFFFFFFFFFFFFFFFFFFFFFFFFFFFFFFFFFFFFFFFFFFFFFFFFFFFFFFFFFF  
@A00155:342:HHGFNDSXY:1:2223:31711:11256 1:N:0:GAACCTAG+TCCGCATA  
GAGCGACTTCTCTCGGGCCACAGCCTTACAGCTGTGGAGCACGGTATCCTCTGCCGAAACAGAGGTT  
GGACAAGACCGGAGGGGTCTCCTAGTTCCAAAGGAGATGTACTCCGGGCTTGTTACACGACCTACCGTG  
+  
FFFFF:FFFFFFFFFFFFFFFFFFFFFFFFFFFFFFFFFFFFFFFFFFFFFFFFFFFFFFFFFFFF:FFFFFFFF  
FFFFFFFFFFFFFFFFFFFFFFFFFFFFFFFFFFFFFFFFFFFFFFFFFFFFFFFFFFFFFFFFFFFFFFFFFFFF  
@A00155:342:HHGFNDSXY:1:2223:32081:11835 1:N:0:GAACCTAG+TCCGCATA  
GAGCGACTTCTCTCGGGCCACAGCCTTACAGCTGTGGAGCACGGTATCCTCTGCCGAAACAGAGGTT  
GGACAAGACCGGAGGGGTCTCCTAGTTCCAAAGGAGATGTACTCCGGGCTTGTTACACGACCTACCGTG  
+  
FFFFFFFFFFFFFFFFFFFFFFFFFFFFFFFFFFFFFFFFFFFFFFFFFFFFFFFFFFFF:FFF:FFFFFFFFFFFFFFFFFFFF  
FFFFF:FFFFFFFFFFFFFFFFFFFFFFFFFFFF:FFFFFFFFFFFFFFFFFFFFFFFFFFFF:FFFF:FFFFF  
@A00155:342:HHGFNDSXY:1:2224:7301:3051 1:N:0:GAACCTAG+TCCGCATA  
GTGGAGCACGGTATCCTCTGCCGAAACAGAGGTTGGACAAGACCGGAGGGGTCTCCTAGTTCCAAAGG  
AGATGTACTCCGGGCTTGTTACACGACCTACCGTGTAAGTCGTAGTCTAGTAGGCTACCTGACGAGTCC  
+  
FFFFFFFFFFFFFFFFFFFFFFFFFFFFFFFFFFFFFFFFFFFFFFFFFFFFFFFFFFFFFFFFFFFF  
FFFFFFFFFFFFFFFFFFFF:FFFFFFFFFFFFFFFFFFFFFFFFFFFF,FFFFFFFFFFFF:FF:FFFFFFFFFFFFF  
@A00155:342:HHGFNDSXY:1:2224:20772:11099 1:N:0:GAACCTAG+TCCGCATA  
GGGCGAGAGAGAGCGACTTCTCTCGGGCCACAGCCTTACAGCTGTGGAGCACGGTATCCTCTGCCGA  
AACAGAGGTTGGACAAGACCGGAGGGGTCTCCTAGTTCCAAAGGAGATGTACTCCGGGCTTGTTACG  
+  
FFFFFFFFFFFF:FFFFFFFFFFFFFFFFFFFFFFFFFFFFFFFFFFFFFFFFFFFFFFFFFFFFFFFFFFFF  
FFFFFFFFFFFFFFFFFFFFFFFFFFFFFFFFFFFFFFFFFFFF:FFFFFFFFFFFFFFFFFFFFFFFFFFFFF  
@A00155:342:HHGFNDSXY:1:2224:21775:11428 1:N:0:GAACCTAG+TCCGCATA  
GGGCGAGAGAGAGCGACTTCTCTCGGGCCACAGCCTTACAGCTGTGGAGCACGGTATCCTCTGCCGA  
AACAGAGGTTGGACAAGACCGGAGGGGTCTCCTAGTTCCAAAGGAGATGTACTCCGGGCTTGTTACG  
+

FFF:FFFFFFFFFFFFFFFFFFFFFFFFFFFFFFFFFFFFFFFFFFFFFFFFFFFFFFFFFFFFFFFF  
FFFFFFFFFFFFFFFFFFFF,FFFF:FFFFFFFFFFFFFFFFFFFFFFFFFFFFFFFFFFFFFFFFFFFFF:FFFFFFFFFFFF:FFFFFFFFFFFFF  
@A00155:342:HHGFNDSXY:1:2224:12301:17848 1:N:0:GAACCTAG+TCCGCATA  
AAGGACTCTCCTCTGGCCTATGGTCATCTCAATGCCGAGAGGGATGTGGAGGGCGAGAGAGAGCGACT  
TCTCTCGGGCCACAGCCTTACAGCTGTGGAGCACGGTATCCTCTGCCGAAACAGAGGTTGGACAAGA  
+  
FFFFFFFFFFFFFFFFFFFFFFFFFFFFFFFFFFFFFFFFFFFFFFFFFFFFFFFFFFFFFFFFFFFFF  
FFFFFFFFFFFFFFFFFFFFFFFFFFFFFFFFFFFFFFFFFFFFFFFFFFFFFFFFFFFFFFFFFFFFF  
@A00155:342:HHGFNDSXY:1:2224:19452:30420 1:N:0:GAACCTAG+TCCGCATA  
GGATGTGGAGGGCGAGAGAGAGCGACTTCTCTCGGGCCACAGCCTTACAGCTGTGGAGCACGGTATC  
CTCTGCCGAAACAGAGGTTGGACAAGACCGGAGGGGTCTCCTAGTTCCAAAGGAGATGTACTCC  
+  
FFFFFFFFFFFFFFFFFFFFFFFFFFFFFFFFFFFFFFFFFFFFFFFFFFFFFFFFFFFFFFFFFFFFF  
FFFFFFFFFFFFFFFFFFFFFFFFFFFFFFFFFFFFFFFFFFFFFFFFFFFFFFFFFFFFF:FFFF:FFFFFFFFFFFFF:  
@A00155:342:HHGFNDSXY:1:2225:27588:26506 1:N:0:GAACCTAG+TCCGCATA  
CTTCTCTCGGGCCACAGCCTTACAGCTGTGGAGCACGGTATCCTCTGCCGAAACAGAGGTTGGACAA  
GACCGGAGGGGTCTCCTAGTTCCAAAGGAGATGTACTCCGGGCTTGTTACGACCTACCGTGTAAGTC  
+  
FFFFFFFFFFFFFFFFFFFFFFFFFFFFFFFFFFFFFFFFFFFFFFFFFFFFFFFFFFFFFFFFFFFFF  
FFFFFFFFFFFFFFFFFFFFFFFFFFFFFFFFFFFFFFFFFFFFFFFFFFFFFFFFFFFFF:FFFF:FFFFFFFFFFFFF:  
@A00155:342:HHGFNDSXY:1:2226:10936:16360 1:N:0:GAACCTAG+TCCGCATA  
AATGCCGAGAGGGATGTGGAGGGCGAGAGAGAGCGACTTCTCTCGGGCCACAGCCTTACAGCTGTGG  
AGCACGGTATCCTCTGCCGAAACAGAGGTTGGACAAGACCGGAGGGGTCTCCTAGTTCCAAAGGAGAT  
+  
FFFFFFFFFFFFFFFFFFFFFFFFFFFFFFFFFFFFFFFFFFFFFFFFFFFFFFFFFFFFFFFFFFFFF  
FFFFFFFFFFFFFFFFFFFFFFFFFFFFFFFFFFFFFFFFFFFFFFFFFFFFFFFFFFFFF:FFFF:FFFFFFFFFFFFF:  
@A00155:342:HHGFNDSXY:1:2226:30689:17033 1:N:0:GAACCTAG+TCCGCATA  
TCGGCAGAGGATACCGTGCTCCACAGCTGTAAAGCTGTGGGCCCGAGAGAAGTCGCTCTCTCTCGCCC  
TCCACATCCCTCTCGGCATTGAGATGACCATAGGCCAGAGGTGAGTCCTTAAGTGGACACA  
+  
FFFFFFFFFFFFFFFFFFFFFFFFFFFFFFFFFFFFFFFFFFFFFFFFFFFFFFFFFFFFFFFFFFFFF  
FFFFFFFFFFFFFFFFFFFFFFFFFFFFFFFFFFFFFFFFFFFFFFFFFFFFFFFFFFFFF:FFFF:FFFFFFFFFFFFF:  
@A00155:342:HHGFNDSXY:1:2226:1181:21324 1:N:0:GAACCTAG+TCCGCATA  
GGATGTGGAGGGCGAGAGAGAGCGACTTCTCTCGGGCCACAGCCTTACAGCTGTGGAGCACGGTATC  
CTCTGCCGAAACAGAGGTTGGACAAGACCGGAGGGGTCTCCTAGTTCCAAAGGAGATGTAC  
+  
FFFFFFFFFFFFFFFFFFFF:FFFFFFFFFFFFFFFFFFFFFFFFFFFF:FFFFFFFFFFFF:FFFFFFFFFFFF:FFFFFFF  
FFFFFFFFFFFFFFFFFFFF:,FFFFFFFFF:FFFFFFFFFFFF:FFFFFFFFF:FFF:,F:FFFFFF:  
@A00155:342:HHGFNDSXY:1:2226:19967:23453 1:N:0:GAACCTAG+TCCGCATA  
CAATGCCGAGAGGGATGTGGAGGGCGAGAGAGAGCGACTTCTCTCGGGCCACAGCCTTACAGCTGTG  
GAGCACGGTATCCTCTGCCGAAACGGAGGTTGGACAAGACCGGAGGGGTCTCCTAGTTCCAAAGGAGA  
+  
FFFFFFFFFFFFFFFFFFFFFFFFFFFFFFFFFFFFFFFFFFFFFFFFFFFFFFFFFFFFF:FFFFFFFFFFFFFFFFFFFFFFFFFFFFF  
FFFFFFFFFFFFFFFFFFFFFFFFFFFFFFFFFFFF,FFFFFFFFFFFF:FFFFFFFFF:FFFFFFFFF:FFFFFFFFF:FFFFFFFFF  
@A00155:342:HHGFNDSXY:1:2226:12255:25160 1:N:0:GAACCTAG+TCCGCATA  
TTCTCTCGGGCCACAGCCTTACAGCTGTGGAGCACGGTATCCTCTGCCGAAACAGAGGTTGGACAAG  
ACCGGAGGGGTCTCCTAGTTCCAAAGGAGATGTACTCCGGGCTTGTTACGACCTACCGTGTAAGTCG  
+  
FFFFFFFFFFFFFFFFFFFFFFFFFFFFFFFFFFFFFFFFFFFFFFFFFFFFFFFFFFFFFFFFFFFFF  
FFFFFFFFFFFFFFFFFFFFFFFFFFFFFFFFFFFFFFFFFFFFFFFFFFFFFFFFFFFFF:FFFF:FFFFFFFFFFFFF:  
@A00155:342:HHGFNDSXY:1:2226:13657:28620 1:N:0:GAACCTAG+TCCGCATA  
AGAGAGAGCGACTTCTCTCGGGCCACAGCCTTACAGCTGTGGAGCACGGTATCCTCTGCCGAAACAG  
AGGTTGGACAAGACCGGAGGGGTCTCCTAGTTCCAAAGGAGATGTACTCCGACTTGTTACGACCTA  
+

FFFFFFFFFFFFFFFFFFFFFFFFFFFFFFFFFFFFFFFFFFFFFFFFFFFFFFFFFFFFFFFFFFFFFFFFF  
FFFFFFFFFFFFFFFFFFFFFFFFFFFFFFFFFFFFFFFFFFFFFFFFFFFFFFFFFFFFFFFFFFFFFFFFF:  
@A00155:342:HHGFNDSXY:1:2226:9182:29042 1:N:0:GAACCTAG+TCCGCATA  
TGTCCAACCTCTGTTTCGGCAGAGGATACCGTGCTCCACAGCTGTAAGGCTGTGGGCCCGAGAGAAGT  
CGCTCTCTCTCGCCCTTCACATCCCTCTCGGCATTGAGATGACCATAGGCCAGAGGTGAGTCCTTAAG  
+  
FFFFFFFFFFFFFFFFFFFFFFFFFFFFFFFFFFFFFFFFFFFFFFFFFFFFFFFFFFFFFFFFFFFFFFFFF  
FFFFFFFFFFFFFFFFFFFFFFFFFFFFFFFFFFFFFFFFFFFFFFFFFFFFFFFFFFFFFFFFFFFFFFFFF:FFFFFFFFFFFFFFFFFFFFF  
@A00155:342:HHGFNDSXY:1:2226:20283:30326 1:N:0:GAACCTAG+TCCGCATA  
GGATGTGGAGGGCGAGAGAGAGCGACTTCTCTCGGGCCACAGCCTTACAGCTGTGGAGCACGGTATC  
CTCTGCCGAAACAGAGGTTGGACAAGACCGGAGGGGTCTCCTAGTTCCAAAGGAGATGTACTCC  
+  
FFFFFFFFFFFFFFFFFFFFFFFFFFFFFFFFFFFFFFFFFFFFFFFFFFFFFFFFFFFFFFFFFFFFFFFFF  
FFFFFFFFFFFFFFFFFFFFFFFFFFFFFFFFFFFFFFFFFFFFFFFFFFFFFFFFFFFFFFFFFFFFFFFFF:FFFFFFFFFFFFFFFFFFFFF  
@A00155:342:HHGFNDSXY:1:2227:3323:6746 1:N:0:GAACCTAG+TCCGCATA  
TTACAGCTGTGGAGCACGGTATCCTCTGCCGAAACAGAGGTTGGACAAGACCGGAGGGGTCTCCTAGT  
TCCAAAGGAGATGTACTCCGGGCTTGTTACGACCTACCGTGTAAGTCGTAAGTCTAGTAGGCTACCTG  
+  
FFFFFFFFFFFFFFFFFFFFFFFFFFFFFFFFFFFFFFFFFFFFFFFFFFFFFFFFFFFFFFFFFFFFFFFFF  
FFFFFFFFFFFFFFFFFFFFFFFFFFFFFFFFFFFFFFFFFFFFFFFFFFFFFFFFFFFFFFFFFFFFFFFFF:FFFFFFFFFFFFF:FFFFFFFFFFFFFFFFFFFFF  
@A00155:342:HHGFNDSXY:1:2227:9019:13291 1:N:0:GAACCTAG+TCCGCATA  
CTTCTCTCGGGCCACAGCCTTACAGCTGTGGAGCACGGTATCCTCTGCCGAAACAGAGGTTGGACAA  
GACCGGAGGGGTCTCCTAGTTCCAAAGGAGATGTACTCCGGGCTTGTTACGACCTACCGTGTAAGTC  
+  
FFFFFFFFFFFFFFFFFFFFFFFFFFFF,FFFFFFFFFFFFFFFFFFFFFFFFFFFFFFFFFFFFFFFFFFFFF  
FFFFFFFFFFFFFFFFFFFFFFFFFFFFFFFFFFFFFFFFFFFFFFFFFFFFFFFFFFFFFFFFFFFFFFFFF  
@A00155:342:HHGFNDSXY:1:2227:22580:15295 1:N:0:GAACCTAG+TCCGCATA  
GAGAGCGACTTCTCTCGGGCCACAGCCTTACAGCTGTGGAGCACGGTATCCTCTGCCGAAACAGAGG  
TTGGACAAGACCGGAGGGGTCTCCTAGTTCCAAAGGAGATGTACTCCGGGCTTGTTACGACCTACCG  
+  
FFFFFFFFFFFFFFFFFFFFFFFFFFFFFFFFFFFFFFFFFFFFFFFFFFFFFFFFFFFFFFFFFFFFFFFFF  
FFFFFFFFFFFFFFFFFFFFFFFFFFFFFFFFFFFFFFFFFFFFFFFFFFFFFFFFFFFFFFFFFFFFFFFFF:FFFFFFFFFFFFFFFFFFFFF:F  
@A00155:342:HHGFNDSXY:1:2227:30662:20212 1:N:0:GAACCTAG+TCCGCATA  
AGAGAGAGCGACTTCTCTCGGGCCACAGCCTTACAGCTGTGGAGCACGGTATCCTCTGCCGAAACAG  
AGGTTGGACAAGACCGGAGGGGTCTCCTAGTTCCAAAGGAGATGTACTCCGGGCTTGTTACGACCTA  
+  
FFFFFFFFFFFFFFFFFFFFFFFFFFFFFFFFFFFFFFFFFFFFFFFFFFFFFFFFFFFFFFFFFFFFFFFFF  
FFFFFFF:FFFFFFF:FFFFFFFFFFFFFFFFFFFFFFFFFFFFFFFFFFFFFFFFFFFFFFFFFFFFF:F:FFFFF  
@A00155:342:HHGFNDSXY:1:2227:1624:36276 1:N:0:GAACCTAG+TCCGCATA  
AGAGAGAGCGACTTCTCTCGGGCCACAGCCTTACAGCTGTGGAGCACGGTATCCTCTGCCGAAACAG  
AGGTTGGACAAGACCGGAGGGGTCTCCTAGTTCCAAAGGAGATGTACTCCGGACTTGTTACGACCTA  
+  
FFFFFFFFFFFFFFFFFFFFFFFFFFFF:FFFFFFFFFFFFFFFFFFFFFFFFFFFFFFFFFFFFFFFFFFFFF  
FF:FFFFFFFFFFFFF:FFFFFFFFFFFFFFFFFFFFFFFFFFFFFFFFFFFFFFFFFFFFFFFFFFFFF  
@A00155:342:HHGFNDSXY:1:2228:12210:2566 1:N:0:GAACCTAG+TCCGCATA  
GAGAGCGACTTCTCTCGGGCCACAGCCTTACAGCTGTGGAGCACGGTATCCTCTGCCGAAACAGAGG  
TTGGACAAGACCGGAGGGGTCTCCTGGTTCCAAAGGAGATGTACTCCGGGCTTGTTACGACCTACCG  
+  
FFFFFFFFFFFFFFFFFFFFFFFFFFFFFFFFFFFFFFFFFFFFFFFFFFFFFFFFFFFFFFFFFFFFFFFFF  
FFFFFFFFFFFFFFFFFFFFFFFFFFFFFFFFFFFFFFFFFFFFFFFFFFFFFFFFFFFFFFFFFFFFFFFFF:  
@A00155:342:HHGFNDSXY:1:2228:8938:4257 1:N:0:GAACCTAG+TCCGCATA  
GGCGAGAGAGAGCGACTTCTCTCGGGCCACAGCCTTACAGCTGTGGAGCACGGTATCCTCTGCCGAA  
ACAGAGGTTGGACAAGACCGGAGGGGTCTCCTAGTTCCAAAGGAGATGTACTCCGGGCTTGTTACGA  
+

:F:FFFFFFFF:FFF:FFFFFFFFFFFFFFFFFFFFFFFF:FFFF:FF:FFFFFFFFFFFFFFFF  
FFFFFFFF,FFFFFFFF:FFFFFFFF:FF:FFFFFFFF:FFFFFFFF:FFFF,FF,F::FFFFFFFF,F  
@A00155:342:HHGFNDSXY:1:2228:22498:10551 1:N:0:GAACCTAG+TCCGCATA  
ATCCTCTGCCGAAACAGAGGTTGGACAAGACCGGAGGGGTCTCCTGGTTCCAAAGGAGATGTACTCCG  
GGCTTGTTACGACCTACCGTGTAAGTCGTAGTCTAGTAGGCTACCTGACGAGTCCTTTTATAGGACGA  
+  
FFFFFFFFFFFFFFFFFFFFFFFFFFFFFFFFFFFFFFFFFFFFFFFFFFFFFFFFFFFFFFFF  
FFFFFFFFFFFFFFFFFFFFFFFF:FFFFFFFFFFFFFFFF:FFFFFFFFFFFFFFFF  
@A00155:342:HHGFNDSXY:1:2228:3287:15013 1:N:0:GAACCTAG+TCCGCATA  
ATCCTCTGCCGAAACAGAGGTTGGACAAGACCGGAGGGGTCTCCTAGTTCCAAAGGAGATGTACTCCG  
GGCTTGTTACGACCTACCGTGTAAGTCGTAGTCTAGTAGGCTACCTGACGAGTCCTTTTATAGGACGA  
+  
FFFFFFFFFFFFFFFFFFFFFFFFFFFFFFFF:FF:FFFFFFFFFFFFFFFFFFFFFFFFFFFFFFFF  
FFFFFFFFFFFFFFFFFFFFFFFF,FFFFFFFFFFFFFFFFFFFFFFFFFFFFFFFF:FFFFFFFF:F  
@A00155:342:HHGFNDSXY:1:2228:8015:28181 1:N:0:GAACCTAG+TCCGCATA  
AGAGAGAGCGACTTCTCTCGGGCCACAGCCTTACAGCTGTGGAGCACGGTATCCTCTGCCGAAACAG  
AGGTTGGACAAGACCGGAGGGGTCTCCTAGTTCCAAAGGAGATGTACTCCGGGCTTGTTACGACCTA  
+  
FFFFFFFFFFFFFFFFFFFFFFFFFFFFFFFF:FFFFFFFFFFFFFFFF:FFFFFFFFFFFFFFFF  
FFFFFFFFFFFFFFFF:FFFFFFFFFFFFFFFFFFFFFFFFFFFFFFFF:FFF:FFFFFFFF:FFFFFFF:  
@A00155:342:HHGFNDSXY:1:2228:21784:29262 1:N:0:GAACCTAG+TCCGCATA  
GTCGCTCTCTCTCGCCCTCCACATCCCTCTCGGCATTGAGATGACCATAGGCCAGAGGTGAGTCCTTA  
AGTGACACAGCTGATCTAAGGCGGTGTGGCGGGCATGGGTTTGAACCCCATGACGGTCGGAGTC  
+  
:FFFFF:,FFFFFFFFFFFFFFFF:FF:F:FFFFF:FFFF::FFF,FF,::,F:FFFFF::  
FF,,:FF:FF::FFFFFFFF,FF,F:FFFFF:FFF,::FFF:FFFFFFFF,FFFFFF,FF:F  
@A00155:342:HHGFNDSXY:1:2228:29903:31892 1:N:0:GAACCTAG+TCCGCATA  
TCTCTCGGGCCACAGCCTTACAGCTGTGGAGCACGGTATCCTCTGCCGAAACAGAGGTTGGACAAGA  
CCGGAGGGGTCTCCTAGTTCCAAAGGAGATGTACTCCGGGCTTGTTACGACCTACCGTGTAAGTC  
+  
FFFF::F::FFFF:FFFF:FF,FFFFFFFF:FFFFFFFFFFFFFFFF:FFFF:F:F:FFFF:F  
F::FF:F,FFFFFFFF:FF,F,F:FFFFFFFF:FFF:F:FFFF,FF,FFFFFFFF  
@A00155:342:HHGFNDSXY:1:2228:10402:36761 1:N:0:GAACCTAG+TCCGCATA  
AGAGAGAGCGACTTCTCTCGGGCCACAGCCTTACAGCTGTGGAGCACGGTATCCTCTGCCGAAACAG  
AGGTTGGACAAGACCGGAGGGGTCTCCTGGTTCCAAAGGAGATGTACTCCGGGCTTGTTACGACCTA  
+  
FFFFFF:FFFFFFFFFFFFFFFFFFFFFFFFFFFFFFFFFFFFFFFFFFFFFFFFFFFFFFFF  
FFFFFF::FFF,FFFFFFFFFFFFFFFFFFFFFFFFFFFFFFFF:FFFFFFFF  
@A00155:342:HHGFNDSXY:1:2229:5511:1235 1:N:0:GAACCTAG+TCCGCATA  
TGTTTCGGCAGAGGATACCGTGCTCCACAGCTGTAAGGCTGTGGGCCCGAGAGAAGTCGCTCTCTCTC  
GCCCTTACATCCCTCTCGGCATTGAGATGACCATAGGCCAGAGGTGAGTCCTTAAGTGACACAGCT  
+  
FFFFFFFFFFFFFFFFFFFFFFFFFFFFFFFFFFFFFFFFFFFFFFFFFFFFFFFF:FFFFFFFF  
FFFFFFFFFFFFFFFFFFFFFFFF:FFFFFFFFFFFFFFFFFFFFFFFFFFFFFFFF  
@A00155:342:HHGFNDSXY:1:2229:1515:3270 1:N:0:GAACCTAG+TCCGCATA  
GGATGTGGAGGGCGAGAGAGCGACTTCTCTCGGGCCACAGCCTTACAGCTGTGGAGCACGGTATC  
CTCTGCCGAAACAGAGGTTGGACAAGACCGGAGGGGTCTCCTGGTTCCAAAGGAGATGTACTCC  
+  
FFFFFFFFFFFFFFFFFFFFFFFFFFFFFFFFFFFFFFFF:FFFFFFFF,FFFFFFF  
FFFFFFFF,FFFFFF:FFFFFF:FFFFFFFFFFFFFFFFFFFFFFFF,FFFF:  
@A00155:342:HHGFNDSXY:1:2229:14615:8547 1:N:0:GAACCTAG+TCCGCATA  
ACTTCTCTCGGGCCACAGCCTTACAGCTGTGGAGCACGGTATCCTCTGCCGAAACAGAGGTTGGACA  
AGACCGGAGGGGTCTCCTAGTTCCAAAGGAGATGTACTCCGGGCTTGTTACGACCTACCGTGTAAGT  
+

FFFFFFFFFFFFFFFFFFFFFFFFFFFFFFFFFFFFFFFFFFFFFFFFFFFFFFFFFFFFFFFFFFFFFFFF  
FFFFFFFFFFFFFFFFFFFFFFFFFFFFFFFFFFFFFFFFFFFFFFFFFFFFFFFFFFFFFFFFFFFFFFFF  
@A00155:342:HHGFNDSXY:1:2229:25889:8750 1:N:0:GAACCTAG+TCCGCATA  
TGTCCACTTAAGGACTCTCCTCTGGCCTATGGTCATCTCAATGCCGAGAGGGATGTGGAGGGCGAGAG  
AGAGCGACTTCTCTCGGGCCACAGCCTTACAGCTGTGGAGCACGGTATCCTCTGCCGAAACAGAGGT  
+  
FFFFFFFFFFFFFFFFFFFFFFFFFFFFFFFFFFFFFFFFFFFFFFFFFFFFFFFFFFFFFFFFFFFFFFFF  
FFFFFFFFFFFFFFFFFFFFFFFFFFFFFFFF,F,FFFFFFFFFFFFFFFFFFFFFFFFFFFFFFFFFFFFF  
@A00155:342:HHGFNDSXY:1:2229:1515:16110 1:N:0:GAACCTAG+TCCGCATA  
TCTGGCCTATGGTCATCTCAATGCCGAGAGGGATGTGGAGGGCGAGAGAGAGCGACTTCTCTCGGGCC  
CACAGCCTTACAGCTGTGGAGCACGGTATCCTCTGCCGAAACAGAGGTTGGACAAGACCGGAGGGGTC  
+  
FFFFFFFFFFFFFFFFFFFFFFFFFFFFFFFFFFFFFFFFFFFFFFFFFFFFFFFFFFFFFFFFFFFFFFFF:FFFFFFFFFFFFFFFFFFFF  
FFFFFFFFFFFFFFFFFFFFFFFFFFFFFFFFFFFFFFFFFFFFFFFFFFFFFFFFFFFFFFFFFFFFFFFF:FFF,FFF:FFFFFFFF,FFFF::F:FFFFFFFF  
@A00155:342:HHGFNDSXY:1:2229:21088:18505 1:N:0:GAACCTAG+TCCGCATA  
GCTGTGTCCACTTAAGGACTCACCTCTGGCCTATGGTCATCTCAATGCCGAGAGGGATGTGGAGGGCG  
AGAGAGAGCGACTTCTCTCGGGCCACAGCCTTACAGCTGTGGAGCACGGTATCCTCTGCCGAAACAG  
+  
FFFFFFFFFFFFFFFFFFFFFFFFFFFFFFFFFFFFFFFFFFFFFFFFFFFFFFFFFFFFFFFFFFFFFFFF  
FFFFFFFFFFFFFFFFFFFFFFFFFFFFFFFFFFFFFFFFFFFFFFFFFFFFFFFFFFFFFFFFFFFFFFFF,F,FFFFFFFFFFFFFFFFFFFF  
@A00155:342:HHGFNDSXY:1:2229:11198:21355 1:N:0:GAACCTAG+TCCGCATA  
CTTCTCTCGGGCCACAGCCTTACAGCTGTGGAGCACGGTATCCTCTGCCGAAACAGAGGTTGGACAA  
GACCGGAGGGGTCTCCTAGTTCCAAAGGAAATGTACTCCGGGCTTGTTACGACCTACCGTGTAAGTC  
+  
FFFFFFFFFFFFFFFFFFFFFFFFFFFFFFFFFFFFFFFFFFFFFFFFFFFFFFFFFFFFFFFFFFFFFFFF  
FFFFFFFFFFFFFFFFFFFFFFFFFFFFFFFFFFFFFFFFFFFFFFFFFFFFFFFFFFFFFFFFFFFFFFFF:FFFFFFFFFFFFFFFFFFFF  
@A00155:342:HHGFNDSXY:1:2229:7636:34507 1:N:0:GAACCTAG+TCCGCATA  
CTTCTCTCGGGCCACAGCCTTACAGCTGTGGAGCACGGTATCCTCTGCCGAAACAGAGGTTGGACAA  
GACCGGAGGGGTCTCCTAGTTCCAAAGGAGATGTACTCCGGGCTTGTTACGACCTACCGTGTAAG  
+  
FFFFFFFFFFFFFFFFFFFFFFFFFFFFFFFFFFFFFFFFFFFFFFFFFFFFFFFFFFFFFFFFFFFFFFFF  
FFFFFFFFFFFFFFFFFFFFFFFFFFFFFFFFFFFFFFFFFFFFFFFFFFFFFFFFFFFFFFFFFFFFFFFF:FFFFF  
@A00155:342:HHGFNDSXY:1:2229:5394:37043 1:N:0:GAACCTAG+TCCGCATA  
CTTCTCTCGGGCCACAGCCTTACAGCTGTGGAGCACGGTATCCTCTGCCGAAACAGAGGTTGGACAA  
GACCGGAGGGGTCTCCTAGTTCCAAAGGAGATGTACTCCGGGCTTGTTACGACCTACCGTGTAAG  
+  
F,FFFFFFFFFFFFFFFFFFFFFFFFFFFFFFFFFFFFFFFFFFFFFFFFFFFFFFFFFFFFFFFFFFFFFFFF:FFFFFFFFFFFFFFFFFFFF  
FFFFFFFFFFFFFFFFFFFFFFFFFFFFFFFFFFFFFFFFFFFFFFFFFFFFFFFFFFFFFFFFFFFFFFFF,FFFFF  
@A00155:342:HHGFNDSXY:1:2230:27823:23406 1:N:0:GAACCTAG+TCCGCATA  
AGAGAGAGCGACTTCTCTCGGGCCACAGCCTTACAGCTGTGGAGCACGGTATCCTCTGCCGAAACAG  
AGGTTGGACAAGACCGGAGGGGTCTCCTAGTTCCAAAGGAGATGTACTCCGGGCTTGTTACGACCTA  
+  
FFFFFFFFFFFFFFFFFFFFFFFFFFFFFFFFFFFFFFFFFFFFFFFFFFFFFFFFFFFFFFFFFFFFFFFF:FFFFFFFFFFFF:FFFFFFFFF  
FFFFFFFFFFFFFFFFFFFFFFFFFFFFFFFFFFFFFFFFFFFFFFFFFFFFFFFFFFFFFFFFFFFFFFFF:FFFFF:FFF:FFFFFFFFF  
@A00155:342:HHGFNDSXY:1:2230:28339:29684 1:N:0:GAACCTAG+TCCGCATA  
AGGGATGTAGAGGGCGAGAGAGAGCGACTTCTCTCGGGCCACAGCCTTACAGCTGTGGAGCACGGTA  
TCCTCTGCCGAAACAGAGGTTGGACAAGACCGGAGGGGTCTCCTAGTTCCAAAGGAGATGTACTCCG  
+  
FFFFFFFFFFFFFFFFFFFFFFFFFFFFFFFFFFFFFFFFFFFFFFFFFFFFFFFFFFFFFFFFFFFFFFFF:FFFFFFFFFFFFFFFFFFFF  
FFFFFFFFFFFFFFFFFFFFFFFFFFFFFFFFFFFFFFFFFFFFFFFFFFFFFFFFFFFFFFFFFFFFFFFF:FFF:FFFFFFFFFFFFFFFFFFFF  
@A00155:342:HHGFNDSXY:1:2230:29107:31015 1:N:0:GAACCTAG+TCCGCATA  
AGGGATGTAGAGGGCGAGAGAGAGCGACTTCTCTCGGGCCACAGCCTTACAGCTGTGGAGCACGGTA  
TCCTCTGCCGAAACAGAGGTTGGACAAGACCGGAGGGGTCTCCTAGTTCCAAAGGAGATGTACTCCG  
+



FFFFFFFFFFFFFFFFFFFFFFFFFFFFFFFFFFFFFFFFFFFFFFFFFFFFFFFFFFFFFFFFFFFFFFFF  
FFFFFFFFFFFFFFFFFFFFFFFFFFFFFFFFFFFFFFFFFFFFFFFFFFFFFFFFFFFFFFFFFFFFFFFF:FFFFFFFFFFFFFFFFFFFFFFFF  
@A00155:342:HHGFNDSXY:1:2230:14733:33959 1:N:0:GAACCTAG+TCCGCATA  
ATCTCAATGCCGAGAGGGATGTGGAGGGCGAGAGAGAGCGACTTCTCTCGGGCCCACAGCCTTACAGC  
TGTGGAGCACGGTATCCTCTGCCGAAACAGAGGTTGGACAAGACCGGAGGGGTCTCCTAGTTCCAAAG  
+  
FFFFFFFFF:FFFFFFFFFFFFFFFFFFFFFFFFFFFFFFFFFFFFFFFFFFFFFFFFFFFFFFFFFFFFFFFF  
FFFFFFFFFFFFFFFFFFFFFFFFFFFFFFFFFFFFFFFFFFFFFFFFFFFFFFFFFFFFFFFFFFFFFFFF  
@A00155:342:HHGFNDSXY:1:2231:8892:2550 1:N:0:GAACCTAG+TCCGCATA  
GAGCGACTTCTCTCGGGCCCACAGCCTTACAGCTGTGGAGCACGGTATCCTCTGCCGAAACAGAGGTT  
GGACAAGACCGGAGGGGTCTCCTAGTTCCAAAGGAGATGTACTCCGGGCTTGTTACGACCTACCGTG  
+  
FFFFFFFFFFFFFFFFFFFFFFFFFFFFFFFFFFFFFFFFFFFFFFFFFFFFFFFFFFFFFFFFFFFFFFFF:FFFFFFFFFFFFFFFFFFFFFFFF  
FFFFFFFFFFFFFFFFFFFFFFFFFFFFFFFFFFFFFFFFFFFFFFFFFFFFFFFFFFFFFFFFFFFFFFFF:FFFFFFFFF,FFFFFFFFFFFFFFFF  
@A00155:342:HHGFNDSXY:1:2231:9218:7529 1:N:0:GAACCTAG+TCCGCATA  
GAGCGACTTCTCTCGGGCCCACAGCCTTACAGCTGTGGAGCACGGTATCCTCTGCCGAAACAGAGGTT  
GGACAAGACCGGAGGGGTCTCCTAGTTCCAAAGGAGATGTACTCCGGGCTTGTTACGACCTACCGTG  
+  
FFFFFFFFFFFFFFFFFFFFFFFFFFFFFFFFFFFFFFFFFFFFFFFFFFFFFFFFFFFFFFFFFFFFFFFF:FFF:FFFFFFFFFFFFFFFF  
FFFFFFFFF:FFFFFFFFFFFFFFFFFFFFFFFFFFFFFFFFFFFFFFFFFFFFFFFFFFFFFFFFFFFFFFFF:FFFFFFFFFFFFF:  
@A00155:342:HHGFNDSXY:1:2231:20220:16720 1:N:0:GAACCTAG+TCCGCATA  
GAGCGACTTCTCTCGGGCCCACAGCCTTACAGCTGTGGAGCACGGTATCCTCTGCCGAAACAGAGGTT  
GGACAAGACCGGAGGGGTCTCCTGGTTCCAAAGGAGATGTACTCCGGGCTTGTTACGACCTACCGTG  
+  
FFFFFFFFFFFFFFFFFFFFFFFFFFFFFFFFFFFFFFFFFFFFFFFFFFFFFFFFFFFFFFFFFFFFFFFF  
FFFFFFFFFFFFFFFFFFFFFFFFFFFFFFFFFFFFFFFFFFFFFFFFFFFFFFFFFFFFFFFFFFFFFFFF  
@A00155:342:HHGFNDSXY:1:2231:16034:24126 1:N:0:GAACCTAG+TCCGCATA  
GGATGTGGAGGGCGAGAGAGAGCGACTTCTCTCGGGCCCACAGCCTTACAGCTGTGGAGCACGGTATC  
CTCTGCCGAAACAGAGGTTGGACAAGACCGGAGGGGTCTCCTAGTTCCAAAGGAGATGTACTCC  
+  
FFFFFFFFFFFFFFFFFFFFFFFFFFFFFFFFFFFFFFFFFFFFFFFFFFFFFFFFFFFFFFFFFFFFFFFF:FFFFFFFFFFFFFFFFFFFFFFFF  
FFFFFFFFF:FFFFFFFFFFFFFFFFFFFFFFFFFFFFFFFFFFFFFFFFFFFFFFFFFFFFFFFFFFFFFFFF,FFFF  
@A00155:342:HHGFNDSXY:1:2231:16324:25254 1:N:0:GAACCTAG+TCCGCATA  
CTTCTCTCGGGCCCACAGCCTTACAGCTGTGGAGCACGGTATCCTCTGCCGAAACAGAGGTTGGACAA  
GACCGGAGGGGTCTCCTGGTTCCAAAGGAGATGTACTCCGGGCTTGTTACGACCTACCGTGTAAGTC  
+  
FFFFFFFFFFFFFFFFFFFFFFFFFFFFFFFFFFFFFFFFFFFFFFFFFFFFFFFFFFFFFFFFFFFFFFFF:FFFF  
FFFFFFFFFFFFFFFFFFFFFFFFFFFFFFFFFFFFFFFFFFFFFFFFFFFFFFFFFFFFFFFFFFFFFFFF:FFFFFFFFFFFFFFFFFFFFFFFF  
@A00155:342:HHGFNDSXY:1:2231:28004:31673 1:N:0:GAACCTAG+TCCGCATA  
CGAGAGAGAGCGACTTCTCTCGGGCCCACAGCCTTACAGCTGTGGAGCACGGTATCCTCTGCCGAAAC  
AGAGGTTGGACAAGACCGGAGGGGTCTCCTAGTTCCAAAGGAGATGTACTCCGGGCTTGTTACGACC  
+  
FFFFFFFFFFFFFFFFFFFFFFFFFFFFFFFFFFFFFFFFFFFFFFFFFFFFFFFFFFFFFFFFFFFFFFFF:FFFFFFF:FFFFFFFFFFFFFFFF  
FFFFFFFFFFFFFFFFFFFFFFFFFFFFFFFFFFFFFFFFFFFFFFFFFFFFFFFFFFFFFFFFFFFFFFFF:FFFFFFFFFFFFFFFFFFFFFFFF  
@A00155:342:HHGFNDSXY:1:2232:18891:11162 1:N:0:GAACCTAG+TCCGCATA  
CAGCCTTACAGCTGTGGAGCACGGTATCCTCTGCCGAAACAGAGGTTGGACAAGACCGGAGGGGTCTC  
CTGTTCCAAAGGAGATGTACTCCGGGCTTGTTACGACCTACCGTGTAAGTCGTAGTCTAGTAGGCT  
+  
FFFFFFFFFFFFFFFFFFFFFFFFFFFFFFFFFFFFFFFFFFFFFFFFFFFFFFFFFFFFFFFFFFFFFFFF  
FFFFFFFFFFFFFFFFFFFFFFFFFFFFFFFFFFFFFFFFFFFFFFFFFFFFFFFFFFFFFFFFFFFFFFFF  
@A00155:342:HHGFNDSXY:1:2232:32353:18944 1:N:0:GAACCTAG+TCCGCATA  
GGATGTGGAGGGCGAGAGAGAGCGACTTCTCTCGGGCCCACAGCCTTACAGCTGTGGAGCACGGTATC  
CTCTGCCGAAACAGAGGTTGGACAAGACCGGAGGGGTCTCCTAGTTCCAAAGGAGATGTACTCC  
+

FFFFFFFF:FFFFFFFFFFFFFFFFFFFFFFFFFFFFFFFFFFFFFFFFFFFFFFFFFFFFFFFFFFFFFFFF  
FFFFFFFFFFFFFFFFFFFFFFFFFFFFFFFFFFFFFFFFFFFFFFFFFFFFFFFFFFFFFFFF:FFFFFFFFFFFFFFFF  
@A00155:342:HHGFNDSXY:1:2232:13928:21292 1:N:0:GAACCTAG+TCCGCATA  
GGGCGAGAGAGAGCGACTTCTCTCGGGCCACAGCCTTACAGCTGTGGAGCACGGTATCCTCTGCCGA  
AACAGAGGTTGGACAAGACCGGAGGGGTACCTAGTTCCAAAGGAGATGTACTCCGGGCTTGTTACG  
+  
FFFFFFFFFFFFFFFFFFFFFFFFFFFFFFFFFFFFFFFFFFFFFFFFFFFFFFFFFFFFFFFFFFFFFFFF  
FFFFFFFFFFFFFFFFFFFFFFFFFFFFFFFFFFFFFFFFFFFFFFFFFFFFFFFFFFFFFFFF:FFFFFFFFFFFF  
@A00155:342:HHGFNDSXY:1:2232:18511:22654 1:N:0:GAACCTAG+TCCGCATA  
TTACAGCTGTGGAGCACGGTATCCTCTGCCGAAACAGAGGTTGGACAAGACCGGAGGGGTCTCCTAGT  
TCCAAAGGAGATGTACTCCGGGCTTGTTACGACCTACCGTGTAAGTCGTAGTCTAGTAGGCTACCTG  
+  
FFFFFFFFFFFFFFFFFFFFFFFFFFFFFFFFFFFFFFFFFFFFFFFFFFFFFFFFFFFFFFFFFFFFFFFF  
FFFFFFFFFFFFFFFFFFFFFFFFFFFFFFFFFFFFFFFFFFFFFFFFFFFFFFFFFFFFFFFF:FFFFFFFFFFFF  
@A00155:342:HHGFNDSXY:1:2232:24288:31782 1:N:0:GAACCTAG+TCCGCATA  
AGCGACTTCTCTCGGGCCACAGCCTTACAGCTGTGGAGCACGGTATCCTCTGCCGAAACAGAGGTTG  
GACAAGACCGGAGGGGTCTCCTAGTTCCAAAGGAGATGTACTCCGGGCTTGTTACGACCTACCGTGT  
+  
FFFFFFFFFFFFFFFFFFFFFFFFFFFFFFFFFFFFFFFFFFFFFFFFFFFFFFFFFFFFFFFFFFFFFFFF  
FFFF:FFFFFFFFFFFFFFFFFFFFFFFFFFFFFFFFFFFFFFFFFFFFFFFFFFFFFFFFFFFFFFFFFFFF  
@A00155:342:HHGFNDSXY:1:2232:19461:33786 1:N:0:GAACCTAG+TCCGCATA  
GGGCGAGAGAGAGCGACTTCTCTCGGGCCACAGCCTTACAGCTGTGGAGCACGGTATCCTCTGCCGA  
AACAGAGGTTGGACAAGACCGGAGGGGTCTCCTAGTTCCAAAGGAGATGTACTCCGGGCTTGTTACG  
+  
FFFFFFFFFFFFFFFFFFFFFFFFFFFFFFFFFFFFFFFFFFFFFFFFFFFFFFFFFFFFFFFFFFFFFFFF  
FFFFFFFFFFFFFFFFFFFFFFFFFFFFFFFFFFFFFFFFFFFFFFFFFFFFFFFFFFFFFFFFFFFFFFFFFFFF  
@A00155:342:HHGFNDSXY:1:2232:31313:36808 1:N:0:GAACCTAG+TCCGCATA  
AGCGACTTCTCTCGGGCCACAGCCTTACAGCTGTGGAGCACGGTATCCTCTGCCGAAACAGAGGTTG  
GACAAGACCGGAGGGGTCTCCTGGTTCCAAAGGAGATGTACTCCGGGCTTGTTACGACCTACCGTGT  
+  
FFFFFFFFFFFFFFFFFFFFFFFFFFFFFFFFFFFFFFFFFFFFFFFFFFFFFFFFFFFFFFFFFFFFFFFF  
FFFFFFFF,FFFFFFFFFFFFFFFFFFFFFFFFFFFFFFFFFFFFFFFFFFFFFFFFFFFFFFFFFFFFFFFF:  
@A00155:342:HHGFNDSXY:1:2233:6027:23578 1:N:0:GAACCTAG+TCCGCATA  
ATCTCAATGCCGAGAGGGATGTAGAGGGCGAGAGAGAGCGACTTCTCTCGGGCCACAGCCTTACAGC  
TGTGGAGCACGGTATCCTCTGCCGAAACAGAGGTTGGACAAGACCGGAGGGGTCTCCTAGTTCCAAAG  
+  
FFFFFFFFFFFF:FFFFFFFFFFFFFFFFFFFFFFFFFFFFFFFFFFFFFFFFFFFFFFFFFFFFFFFFFFFF:  
FFFFFFFF:FFFFFFFFFFFFFFFFFFFFFFFFFFFFFFFFFFFFFFFFFFFFFFFFFFFFFFFFFFFFFFFFFFFF  
@A00155:342:HHGFNDSXY:1:2233:5990:24612 1:N:0:GAACCTAG+TCCGCATA  
ATCTCAATGCCGAGAGGGATGTAGAGGGCGAGAGAGAGCGACTTCTCTCGGGCCACAGCCTTACAGC  
TGTGGAGCACGGTATCCTCTGCCGAAACAGAGGTTGGACAAGACCGGAGGGGTCTCCTAGTTCCAAAG  
+  
FFFFFFFFFFFFFFFFFFFFFFFFFFFF,FFFFFFFFFFFFFFFFFFFFFFFFFFFFFFFFFFFFFFFFFFFF:FFFF  
FFFFFFFFFFFFFFFFFFFFFFFFFFFFFFFFFFFFFFFFFFFFFFFFFFFFFFFFFFFFFFFF:F,FFFFFFFFFFFF:FFFFFFFFFFFF  
@A00155:342:HHGFNDSXY:1:2233:22824:25081 1:N:0:GAACCTAG+TCCGCATA  
TTAAAGACTCACCTCTGGCCTATGGTCATCTCAATGCCGAGAGGGATGTGGAGGGCGAGAGAGAGCGA  
CTTCTCTCGGGCCACAGCCTTACAGCTGTGGAGCACGGTATCCTCTGCCGAAACAGAGGTTGGACAA  
+  
FFFFFFFFFFFFFFFFFFFFFFFFFFFFFFFFFFFFFFFFFFFFFFFFFFFFFFFFFFFFFFFF:FFFFFFFFF:FFFFFF:FFFF:FFFF:F  
FFFFFFFFFFFF:FFFFFFFFFFFFFFFFFFFF:FFFFFFFFF:FFFFFFFFFFFFFFFFFFFFFFFFFFFFF  
@A00155:342:HHGFNDSXY:1:2233:19578:32362 1:N:0:GAACCTAG+TCCGCATA  
GGATGTAGAGGGCGAGAGAGAGCGACTTCTCTCGGGCCACAGCCTTACAGCTGTGGAGCACGGTATC  
CTCTGCCGAAACAGAGGTTGGACAAGACCGGAGGGGTCTCCTAGTTCCAAAGGAGATGTACTCC  
+

```
FFFFFFFFFFFFFFFFFFFFFFFFFFFFFFFFFFFFFFFFFFFFFFFFFFFFFFFFFFFFFFFFFFFFF:FFFFFFFFFFFFFFFFFFFFFFF  
FFFFFFFFFFFFFFFFFFFFFFFFFFFFFFFFFFFFFFFFFFFFFFFFFFFFFFFFFFFFFFFFFFFFFFF  
@A00155:342:HHGFNDSXY:1:2234:23683:1767 1:N:0:GAACCTAG+TCCGCATA  
AACCCATGCCCCACCACACCGCCTTAGATCAGCTGTGTCCACTTAAGGACTCACCTCTGGCCTATGGT  
CATCTCAATGCCGAGAGGGATGTGGAGGGCGAGAGAGAGCGACTTCTCTCGGGCCCACAGCCTTACAG  
+  
F:FFFFFFFFFFFFFFFFFFFFFFFFFFFFFFFFFFFFFFFFFFFFFFFFFFFFFFFFFFFFFFFFFFFFF  
FFFFFFFFFFFFFFFFFFFFFFFFFFFFFFFFFFFFFFFFFFFFFFFFFFFFFFFFFFFFFFFFFFFFFFF  
@A00155:342:HHGFNDSXY:1:2234:22869:15546 1:N:0:GAACCTAG+TCCGCATA  
CAATGCCGAGAGGGATGTGGAGGGCGAGAGAGAGCGACTTCTCTCGGGCCCACAGCCTTACAGCTGTG  
GAGCACGGTATCCTCTGCCGAAACAGAGGTTGGACAAGACCGGAGGGGTCTCCTAGTTCCAAAGGAGA  
+  
FFFFFFFFFFFFFFFFFFFFFFFFFFFFFFFFFFFFFFFFFFFFFFFFFFFFFFFFFFFFFFFFFFFFFFF  
FFFFFFFFFFFFFFFFFFFFFFFFFFFFFFFFFFFFFFFFFFFFFFFFFFFFFFFFFFFFFFFFFFFFFFF  
@A00155:342:HHGFNDSXY:1:2234:16993:32988 1:N:0:GAACCTAG+TCCGCATA  
CTTCTCTCGGGCCCACAGCCTTACAGCTGTGGAGCACGGTATCCTCTGCCGAAACAGAGGTTGGACAA  
GACCGAGAGGGTCTCCTAGTTCCAAAGGAGATGTACTCCGGGCTTGTTACGACCTACCGTGTAAGTC  
+  
FFFFFFFFFFFFFFFFFFFFFFFFFFFFFFFFFFFFFFFFFFFFFFFFFFFFFFFFFFFFFFFFFFFFFFF  
FFFFFFFFFFFFFFFFFFFFFFFFFFFFFFFFFFFFFFFFFFFFFFFFFFFFFFFFFFFFFFFFFFFFFFF  
@A00155:342:HHGFNDSXY:1:2234:4218:33599 1:N:0:GAACCTAG+TCCGCATA  
TCTCTCGGGCCCACAGCCTTACAGCTGTGGAGCACGGTATCCTCTGCCGAAACAGAGGTTGGACAAGA  
CCGGAGGGGTCTCCTAGTTCCAAAGGAGATGTACTCCGGGCTTGTTACGACCTACCGTGTAAGTCGT  
+  
FFFFFFFFFFFFFFFFFFFFFFFFFFFFFFFFFFFFFFFFFFFFFFFFFFFFFFFFFFFFFFFFFFFFFFF  
FFFFFFFFFFFFFFFFFFFFFFFFFFFFFFFFFFFFFFFFFFFFFFFFFFFFFFFFFFFFFFFFFFFFFFF  
@A00155:342:HHGFNDSXY:1:2234:20455:36292 1:N:0:GAACCTAG+TCCGCATA  
TTAGATCAGCTGTGTCCACTTAAGGACTCACCTCTGGCCTATGGTCATCTCAATGCCGAGAGGGATGT  
AGAGGGCGAGAGAGAGCGACTTCTCTCGGGCCCACAGCCTTACAGCTGTGGAGCACGGTATCCTCTGC  
+  
FFFFFFFFFFFFFFFFFFFFFFFFFFFFFFFFFFFFFFFFFFFFFFFFFFFFFFFFFFFFFFFFFFFFFFF:F,FFFFFFFF  
FFFFFFFFFFFFFFFFFFFFFFFFFFFFFFFFFFFFFFFFFFFFFFFFFFFFFFFFFFFFFFFFFFFFFFF  
@A00155:342:HHGFNDSXY:1:2235:4074:14278 1:N:0:GAACCTAG+TCCGCATA  
GGATGTGGAGGGCGAGAGAGAGCGACTTCTCTCGGGCCCACAGCCTTACAGCTGTGGAGCACGGTATC  
CTCTGCCGAAACAGAGGTTGGACAAGACCGGAGGGGTCTCCTAGTTCCAAAGGAGATGTACTCC  
+  
FFFFFFFFFFFFFFFFFFFFFFFFFFFFFFFFFFFFFFFFFFFFFFFFFFFFFFFFFFFFFFFFFFFFFFF:FFFFFFFFFFFFFFFFFFFFF  
FFFFFFFFFFFFFFFFFFFFFFFFFFFFFFFFFFFFFFFFFFFFFFFFFFFFFFFFFFFFFFFFFFFFFFF  
@A00155:342:HHGFNDSXY:1:2235:21251:20509 1:N:0:GAACCTAG+TCCGCATA  
CACAGCCTTACAGCTGTGGAGCACGGTATCCTCTGCCGAAACAGAGGTTGGACAAGACCGGAGGGGTC  
TCCTAGTTCCAAAGGAGATGTACTCCGGGCTTGTTACGACCTACCGTGTAAGTCGTAGTCTAGTAGG  
+  
FFFFFFFFFFFFFFFFFFFFFFFFFFFFFFFFFFFFFFFFFFFFFFFFFFFFFFFFFFFFFFFFFFFFFFF  
FFFFFFFFFFFFFFFFFFFFFFFFFFFFFFFFFFFFFFFFFFFFFFFFFFFFFFFFFFFFFFFFFFFFFFF  
@A00155:342:HHGFNDSXY:1:2236:25635:5901 1:N:0:GAACCTAG+TCCGCATA  
GGATGTGGAGGGCGAGAGAGAGCGACTTCTCTCGGGCCCACAGCCTTACAGCTGTGGAGCACGGTATC  
CTCTGCCGAAACAGAGGTTGGACAAGACCGGAGGGGTCTCCTGGTTCCAAAGGAG  
+  
FFFFFFFFFFFFFFFFFFFFFFFFFFFFFFFFFFFFFFFFFFFFFFFFFFFFFFFFFFFFFFFFFFFFFFF  
FFFFFFFFFFFFFFFFFFFFFFFFFFFFFFFFFFFFFFFFFFFFFFFFFFFFFFFFFFFFFFFFFFFFFFF,FFFF  
@A00155:342:HHGFNDSXY:1:2236:11930:9377 1:N:0:GAACCTAG+TCCGCATA  
CTATGGTCATCTCAATGCCGAGAGGGATGTGGAGGGCGAGAGAGAGCGACTTCTCTCGGGCCCACAGC  
CTTACAGCTGTGGAGCACGGTATCCTCTGCCGAAACAGAGGTTGGACAAGACCGGAGGGGTCTCCTA
```

FFFFF::FFFFFFFFFFFF,F:FFFFFFFFFFFF,FFF:FFFFFFFFFFFF,FFFFF,F:FFFF:FFF  
FF:FFFF,:FFFFFFFF:FFFF:FFFFFFFFFFFF:, :FFFFF,:FF:FFFF,F:F:FF::,FFFFF  
@A00155:342:HHGFNDSXY:1:2236:2989:33254 1:N:0:GAACCTAG+TCCGCATA  
AGAGAGAGCGACTTCTCTCGGGCCCCACAGCCTTACAGCTGTGGAGCACGGTATCCTCTGCCGAAACAG  
AGGTTGGACAAGACCGGAGGGGTCTCCTGGTTCCAAAGGAGATGTACTCCGGGCTTGTTACGACCTA  
+  
FFFFFFFFFFFFFFFFFFFFFFFFFFFFFFFFFFFFFFFFFFFFFFFFFFFFFFFFFFFFFFFFFFFFFFFFF:FFFFFFFFFFFFFFFFFFFFFFFFFFFFF  
FFFFFFFFFFFFFFFFFFFFFFFFFFFFFFFFFFFFFFFFFFFFFFFFFFFFFFFFFFFFFFFFFFFFFFFFFFFFF  
@A00155:342:HHGFNDSXY:1:2237:7509:16877 1:N:0:GAACCTAG+TCCGCATA  
CAATGCCGAGAGGGATGTGGAGGGCGAGAGAGAGCGACTTCTCTCGGGCCCCACAGCCTTACAGCTGTG  
GAGCACGGTATCCTCTGCCGAAACAGAGGTTGGACAAGACCGGAGGGGTCTCCTAGTTCCAAAGGAGA  
+  
FFFFFFFFFFFF:FFFF,FFFFFFFF:FFFFFFFFFFFFFFFFFFFFFFFFFFFFFFFFFFFFFFFFFFFFF,FFFFFFFF  
FFFFFFFFFFFFFFFFFFFFFFFFFFFFFFFFFFFFFFFFFFFFFFFFFFFFFFFFFFFFFFFFFFFFFFFFFFFFF:FFFFFFFFFFFFFFFFFFFFFFFFFFFFF  
@A00155:342:HHGFNDSXY:1:2237:17146:18662 1:N:0:GAACCTAG+TCCGCATA  
GGATGTGGAGGGCGAGAGAGAGCGACTTCTCTCGGGCCCCACAGCCTTACAGCTGTGGAGCACGGTATC  
CTCTGCCGAAACAGAGGTTGGACAAGACCGGAGGGGTCTCCTAGTTCCAAAGGAGATGTACTCC  
+  
FFFFFFFFFFFFFFFFFFFFFFFFFFFFFFFFFFFFFFFFFFFFFFFFFFFFFFFFFFFFFFFFFFFFFFFFFFFFF  
FFFFFFFFFFFFFFFFFFFF:FFFFFFFFFFFFFFFFFFFFFFFFFFFFFFFFFFFFFFFFFFFFFFFFFFFFFFFFFFFFF  
@A00155:342:HHGFNDSXY:1:2238:21766:1423 1:N:0:GAACCTAG+TCCGCATA  
AGAGAGAGCGACTTCTCTCGGGCCCCACAGCCTTACAGCTGTGGAGCACGGTATCCTCTGCCGAAACAG  
AGGTTGGACAAGACCGGAGGGGTCTCCTGGTTCCAAAGGAGATGTACTCCGGGCTTGTTACGACCTA  
+  
FFFFFFFFFFFFFFFFFFFFFFFFFFFFFFFFFFFFFFFFFFFFFFFFFFFFFFFFFFFFFFFFFFFFFFFFFFFFF  
FFFFFFFFFFFFFFFFFFFFFFFFFFFFFFFFFFFFFFFFFFFFFFFFFFFFFFFFFFFFFFFFFFFFFFFFFFFFF  
@A00155:342:HHGFNDSXY:1:2238:3278:15624 1:N:0:GAACCTAG+TCCGCATA  
GGATGTGGAGGGCGAGAGAGAGCGACTTCTCTCGGGCCCCACAGCCTTACAGCTGTGGAGCACGGTATC  
CTCTGCCGAAACAGAGGTTGGACAAGACCGGAGGGGTCTCCTAGTTCCAAAGGAGATGTACTC  
+  
FFF:FFFFFFFFFFFFFFFFFFFFFFFFFFFFFFFFFFFFFFFFFFFFFFFFFFFFFFFFFFFFFFFFFFFFF  
FFFFFFFFFFFFFFFFFFFFFFFFFFFFFFFFFFFFFFFFFFFFFFFFFFFFFFFFFFFFFFFFFFFFF,FFFFFFFF:FFFFFFFFFFFFFFFFFFFFF  
@A00155:342:HHGFNDSXY:1:2238:23583:31250 1:N:0:GAACCTAG+TCCGCATA  
CAATGCCGAGAGGGATGTGGAGGGCGAGAGAGAGCGACTTCTCTCGGGCCCCACAGCCTTACAGCTGTG  
GAGCACGGTATCCTCTGCCGAAACAGAGGTTGGACAAGACCGGAGGGGTCTCCTAGTTCCAAAGGAGA  
+  
FFFFFFFFFFFFFFFFFFFFFFFFFFFFFFFFFFFFFFFFFFFFFFFFFFFFFFFFFFFFFFFFFFFFFFFFFFFFF  
FFFFFFFFFFFFFFFFFFFFFFFFFFFFFFFFFFFFFFFFFFFFFFFFFFFFFFFFFFFFFFFFFFFFFFFFFFFFF  
@A00155:342:HHGFNDSXY:1:2239:27778:9987 1:N:0:GAACCTAG+TCCGCATA  
GAGAGAGCGACTTCTCTCGGGCCCCACAGCCTTACAGCTGTGGAGCACGGTATCCTCTGCCGAAACAGA  
GGTTGGACAAGACCGGAGGGGTCTCCTAGTTCCAAAGGAGATGTACTCCGGGCTTGTTACGACCTAC  
+  
FFFFFFFFFFFFFFFFFFFFFFFFFFFFFFFFFFFFFFFFFFFFFFFFFFFFFFFFFFFFFFFFFFFFFFFFFFFFF  
FFFF:FFFFF,FFF:FFFFFFFFFFFFFFFFFFFFFFFFFFFFFFFFFFFFFFFFFFFFFFFFFFFFFFFFFFFFF,FFFFFFFFFFFFFFFFFFFFFFFFFFFFF  
@A00155:342:HHGFNDSXY:1:2239:30047:12696 1:N:0:GAACCTAG+TCCGCATA  
GAGAGAGCGACTTCTCTCGGGCCCCACAGCCTTACAGCTGTGGAGCACGGTATCCTCTGCCGAAACAGA  
GGTTGGACAAGACCGGAGGGGTCTCCTAGTTCCAAAGGAGATGTACTCCGGGCTTGTTACGACCTAC  
+  
FFFFFFFFFFFFFFFFFFFFFFFFFFFFFFFFFFFFFFFFFFFFFFFFFFFFFFFFFFFFFFFFFFFFFFFFFFFFF  
FFFFFFFFFFFFFFFFFFFF:FFFFFFFFFFFF:FFFFFFFFFFFFFFFFFFFFFFFFFFFFFFFFFFFFFFFFFFFFF:FFFFFFFF  
@A00155:342:HHGFNDSXY:1:2239:10773:20807 1:N:0:GAACCTAG+TCCGCATA  
CCTTACAGCTGTGGAGCACGGTATCCTCTGCCGAAACAGAGGTTGGACAAGACCGGAGGGGTCTCCTA  
GTTCCAAAGGAGATGTACTCCGGGCTTGTTACGACCTACCGTGTAAAGTCGTAGTCTAGTAGGCTACC  
+

FFFFFFFFFFFFFFFFFFFFFFFFFFFFFFFFFFFFFFFFFFFFFFFFFFFFFFFFFFFFFFFFFFFFFFFF  
FFFFFFFFFFFFFFFFFFFFFFFFFFFFFFFFFFFFFFFFFFFFFFFFFFFFFFFFFFFFFFFFFFFFFFFF::FFFFFF:FFFFFF  
@A00155:342:HHGFNDSXY:1:2239:29984:35665 1:N:0:GAACCTAG+TCCGCATA  
CTTCTCTCGGGCCCACAGCCTTACAGCTGTGGAGCACGGTATCCTCTGCCGAAACAGAGGTTGGACAA  
GACCGGAGGGGTCTCCTAGTTCCAAAGGAGATGTACTCCGGGCTTGTTACGACCTACCGTGTAAGTC  
+  
FFFFFFFFFFFFFFFFFFFFFFFFFFFFFFFFFFFFFFFFFFFFFFFFFFFFFFFFFFFFFFFFFFFFFFFF  
FFFFFFFFFFFFFFFFFFFFFFFFFFFFFFFFFFFFFFFFFFFFFFFFFFFFFFFFFFFFFFFFFFFFFFFF:FFFF:FFF  
@A00155:342:HHGFNDSXY:1:2240:29460:11678 1:N:0:GAACCTAG+TCCGCATA  
ATGCCCCGCCACACCGCCTTAGATCAGCTGTGTCCACTTAAGGACTCACCTCTGGCCTATGGTCATCT  
CAATGCCGAGAGGGATGTGGAGGGCGAGAGAGAGCGACTTCTCTCGGGCCCACAGCCTTACAGCTGTG  
+  
FFFFFFFFFFFFFFFFFFFFFFFFFFFFFFFFFFFFFFFFFFFFFFFFFFFFFFFFFFFFFFFFFFFFFFFF  
FFFFFFFFFFFFFFFFFFFFFFFFFFFFFFFFFFFFFFFFFFFFFFFFFFFFFFFFFFFFFFFFFFFFFFFF  
@A00155:342:HHGFNDSXY:1:2240:15311:12038 1:N:0:GAACCTAG+TCCGCATA  
GCGACTTCTCTCGGGCCCACAGCCTTACAGCTGTGGAGCACGGTATCCTCTGCCGAAACAGAGGTTGG  
ACAAGACCGGAGGGGTCTCCTAGTTCCAAAGGAGATGTACTCCGGGCTTGTTACGACCTACCGTGTA  
+  
FFFFFFFFFFFFFFFFFFFFFFFFFFFFFFFFFFFFFFFFFFFFFFFFFFFFFFFFFFFFFFFFFFFFFFFF  
FFFFFFFFFFFFFFFFFFFFFFFFFFFFFFFFFFFFFFFFFFFFFFFFFFFFFFFFFFFFFFFFFFFFFFFF  
@A00155:342:HHGFNDSXY:1:2240:6216:25848 1:N:0:GAACCTAG+TCCGCATA  
AGCGACTTCTCTCGGGCCCACAGCCTTACAGCTGTGGAGCACGGTATCCTCTGCCGAAACAGAGGTTG  
GACAAGACCGGAGGGGTCTCCTAGTTCCAAAGGAGATGTACTCCGGGCTTGTTACGACCTACCGTGT  
+  
FFFFFFFFFFFFFFFFFFFFFFFFFFFFFFFFFFFFFFFFFFFFFFFFFFFFFFFFFFFFFFFFFFFFFFFF  
FFFFFFFFFFFFFFFFFFFFFFFFFFFFFFFFFFFFFFFFFFFFFFFFFFFFFFFFFFFFFFFFFFFFFFFF  
@A00155:342:HHGFNDSXY:1:2240:23900:27539 1:N:0:GAACCTAG+TCCGCATA  
CTTCTCTCGGGCCCACAGCCTTACAGCTGTGGAGCACGGTATCCTCTGCCGAAACAGAGGTTGGACAA  
GACCGGAGGGGTCTCCTAGTTCCAAAGGAGATGTACTCCGGGCTTGTTACGACCTACCGTGTAAGTC  
+  
FFFFFFFFFFFFFFFFFFFFFFFFFFFFFFFFFFFFFFFFFFFFFFFFFFFFFFFFFFFFFFFFFFFFFFFF  
FFFFFFFFFFFFFFFFFFFFFFFFFFFFFFFFFFFFFFFFFFFFFFFFFFFFFFFFFFFFFFFFFFFFFFFF,FFFFFFFFFFFFFFFFFFFFFFFF:FFF  
@A00155:342:HHGFNDSXY:1:2240:16116:31626 1:N:0:GAACCTAG+TCCGCATA  
AGAGAGAGCGACTTCTCTCGGGCCCACAGCCTTACAGCTGTGGAGCACGGTATCCTCTGCCGAAACAG  
AGGTTGGACAAGACCGGAGGGGTCTCCTGGTTCCAAAGGAGATGTACTCCGGGCTTGTTACGACCTA  
+  
FFFFFFFFFFFFFFFFFFFFFFFFFFFFFFFFFFFFFFFFFFFFFFFFFFFFFFFFFFFFFFFFFFFFFFFF  
FFFFFFFFFFFFFFFFFFFFFFFFFFFFFFFFFFFFFFFFFFFFFFFFFFFFFFFFFFFFFFFFFFFFFFFF:  
@A00155:342:HHGFNDSXY:1:2240:20437:32503 1:N:0:GAACCTAG+TCCGCATA  
GAGGGCGAGAGAGAGCGACTTCTCTCGGGCCCACAGCCTTACAGCTGTGGAGCACGGTATCCTCTGCC  
GAAACAGAGGTTGGACAAGACCGGAGGGGTCTCCTAGTTCCAAAGGAGATGTACTCCGGGCTTGTTCA  
+  
:FFFF,FFF,FFFF,FFF::F:::FFFFFFFF:FFF:FFF:FF,F,FFFF,FFFFFFFFFFFF  
FFF,FFFF,FF,FFFF,:,FFF,FFFFFFFF::FF:F,:FFFFFFFFFFFF,FFFFFFFF,FF::FFF  
@A00155:342:HHGFNDSXY:1:2240:12617:36839 1:N:0:GAACCTAG+TCCGCATA  
CCACCACACCGCCTTAGATCAGCTGTGTCCACTTAAGGACTCACCTCTGGCCTATGGTCATCTCAATG  
CCGAGAGGGATGTGGAGGGCGAGAGAGAGCGACTTCTCTCGGGCCCACAGCCTTACAGCTGTGGAGCA  
+  
FFFFFFFFFFFFFFFFFFFFFFFFFFFFFFFFFFFFFFFFFFFFFFFFFFFFFFFFFFFFFFFFFFFFFFFF  
FFFFF:FFF:FFFFFFFFFFFFFFFFFFFFFFFFFFFFFFFFFFFFFFFFFFFFFFFFFFFFFFFFFFFF  
@A00155:342:HHGFNDSXY:1:2241:26377:1078 1:N:0:GAACCTAG+TCCGCATA  
TGGTCATCTCAATGCCGAGAGGGATGTGGAGGGCGAGAGAGAGCGACTTCTCTCGGGCCCACAGCCTT  
ACAGCTGTGGAGCACGGTATCCTCTGCCGAAACAGAGGTTGGACAAGACCGGAGGGGTC  
+

FFFFFFFFFFFFFFFFFFFFFFFFF,F,FFFFFFFFFFFFFFFFFFFFFFFF:FFFFFFFFFFFFFFFFFFFF  
FFFFF:FFFFFFFFFFFFFFFFFFFFFFFFFFFFFFFFFFFFFFFFFFFFFFFFFFFFF  
@A00155:342:HHGFNDSXY:1:2241:24939:16908 1:N:0:GAACCTAG+TCCGCATA  
GGGCGAGAGAGAGCGACTTCTCTCGGGCCCACAGCCTTACAGCTGTGGAGCACGGTATCCTCTGCCGA  
AACAGAGGTTGGACAAGACCGGAGGGGTCTCCTAGTTCCAAAGGAGATGTACTCCGGGCTTGTTACAG  
+  
FFFFFFFFFFFFFFF:FFFFFFFFFFFFFFF,FFFFFFFFFFFFFFFFFFFFFFFF:FFFF:FFFFFFFFFFFFFFF:F:FF  
FFFFFFFFFFFFFFFFFFFFF:FFFFFFFFFFFFFFF:FFFFFFFFFFFFFFF:FFF:FFFFFFFFF:FFFFFFFFFFFF:  
@A00155:342:HHGFNDSXY:1:2241:31738:25269 1:N:0:GAACCTAG+TCCGCATA  
TGCCGAGAGGGATGTGGAGGGCGAGAGAGAGCGACTTCTCTCGGGCCCACAGCCTTACAGCTGTGGAG  
CACGGTATCCTCTGCCGAAACAGAGGTTGGACAAGACCGGAGGGGTCTCCTAGTTCCAAAGGAGATG  
+  
FFFFFFFFFFFFFFF,FFFFFFFFFFFFFFFFF:FFFFFFFFFFFFFFFFFFFFFFFFFFFF,FF:FFFFFFFFFFFFFFF  
FFFFFFFFF,FFFFFFFFF:FFFFFFFFF:FFFF:FFFFFFFFFFFFFFFFFFFF,FFFFFFFFFFFF,FF:F  
@A00155:342:HHGFNDSXY:1:2241:21432:26991 1:N:0:GAACCTAG+TCCGCATA  
TTAAGGACTCTCCTCTGCGCTATGGTCATCTCAATGCCGAGAGGGATGTGGAGGGCGAGAGAGAGCGA  
CTTCTCTCGGGCCCACAGCCTTACAGCTGTGGAGCACGGTATCCTCTGCCGAAACAGAGGTTGGACAA  
+  
FFFFFFFFFFFFFFFFFFFFFFFFFFFFFFFFFFFFFFFFFFFFFFFFFFFFFFFFF:FFFFFFFFFFFFFFFFFFFFF  
F:FFFFFFFFFFFFFFFFFFFFFFFFFFFFFFFFFFFFFFFFFFFFFFFFFFFFFFFFFFFF,FFFFFFFFFFFF  
@A00155:342:HHGFNDSXY:1:2241:29649:32800 1:N:0:GAACCTAG+TCCGCATA  
CGACTTCTCTCGGGCCCACAGCCTTACAGCTGTGGAGCACGGTATCCTCTGCCGAAACAGAGGTTGGA  
CAAGACCGGAGGGGTCTCCTAGTTCCAAAGGAGATGTACTCCGGGCTTGTTACGACCTACCGTGTA  
+  
FFFF,FFFF:FFFFFFFFFFFFFFFFFFFFFFFFFFFFFFFFFFFFFFFFFFFFFFFFFFFFFFFFFFFFF  
FFFFFFFFFFFFFFFFFFFFFFFFFFFFFFFFFFFFFFFFFFFFFFFFFFFFFFFFFFFFFFFFFFFFFFFFFFFF  
@A00155:342:HHGFNDSXY:1:2242:6470:1078 1:N:0:GAACCTAG+TCCGCATA  
CCTCTGCCGAAACAGAGGTTGGACAAGACCGGAGGGGTCTCCTAGTTCCAAAGGAGATGTACTCCAGG  
CTTGTTACGACCTACCGTGTAAGTCGTAGTCTAGTAGGCTACCTGACGAGTCCTTTTtaggacgaaa  
+  
FFFFFFFFFFFFFFFFFFFFFFFFFFFFFFFFFFFFFFFFFFFFFFFFFFFFFFFFFFFF:FFFFFFFFFFFFF  
FFFFFFFFFFFFFFFFFFFFFFFFFFFFFFFFFFFFFFFFFFFFFFFFFFFFFFFFFFFFFFFFFFFF,FFFFFFFFFFFFF  
@A00155:342:HHGFNDSXY:1:2242:6298:22576 1:N:0:GAACCTAG+TCCGCATA  
GAGCGACTTCTCTCGGGCCCACAGCCTTACAGCTGTGGAGCACGGTATCCTCTGCCGAAACAGAGGTT  
GGACAAGACCGGAGGGGTCTCCTAGTTCCAAAGGAGATGTACTCCGGGCTTGTTACGACCTACCGTG  
+  
FFFFFFFFFFFFFFFFFFFFFFFFFFFFFFFFFFFF:FFF:FFFFFFFFFFFFFFFFF:FFFF:FFFFFFFFFFFFFFF  
FFFFFFFFFFFFFFFFFFFFF:FFFFFFFFFFFFFFFFFFFFFFFFFFFFFFFFFFFFFFFFFFFFFFFFFFFFF  
@A00155:342:HHGFNDSXY:1:2243:15501:4977 1:N:0:GAACCTAG+TCCGCATA  
CTTCTCTCGGGCCCACAGCCTTACAGCTGTGGAGCACGGTATCCTCTGCCGAAACAGAGGTTGGACAA  
GACCGGAGGGGTCTCCTAGTTCCAAAGGAGATGTACTCCGGGCTTGTTACGACCTACCGTGTAAGTC  
+  
FFFFFFFFFFFFFFFFFFFFFFFFFFFFFFFFFFFFFFFFFFFFFFFFFFFFFFFFFFFFFFFFFFFFFFFFFFFF  
FFFFFFFFFFFFFFFFFFFFFFFFFFFFFFFFFFFFFFFFFFFFFFFFFFFFFFFFFFFFFFFFFFFFFFFFFFFF  
@A00155:342:HHGFNDSXY:1:2243:30653:17973 1:N:0:GAACCTAG+TCCGCATA  
AGAGCGACTTCTCTCGGGCCCACAGCCTTACAGCTGTGGAGCACGGTATCCTCTGCCGAAACAGAGGT  
TGGACAAGACCGGAGGGGTCTCCTGGTTCCAAAGGAGATGTACTCCGGGCTTGTTACGACCTACCGT  
+  
FFFFFFFFFFFFFFFFFFFFFFFFFFFFFFFFFFFFFFFFFFFFFFFFFFFFFFFFFFFFFFFFFFFFFFFFFFFF  
FFFFFFFFFFFFFFFFFFFFFFFFFFFFFFFFFFFFFFFFFFFFFFFFFFFFFFFFFFFFFFFFFFFF:FFFFFFFFFFFFF  
@A00155:342:HHGFNDSXY:1:2243:12048:23202 1:N:0:GAACCTAG+TCCGCATA  
GATGTGGAGGGCGAGAGAGAGCGACTTCTCTCGGGCCCACAGCCTTACAGCTGTGGAGCACGGTATCC  
TCTGCCGAAACAGAGGTTGGACAAGACCGGAGGGGTCTCCTGGTTCCAAAGGAGATGTACTCCGGGCT

FFFFFFFFFFFFFFFFFFFFFFFFFFFFFFFFFFFFFFFFFFFFFFFFFFFFFFFFFFFFFFFFFFFFFFFF  
FFFFFFFFFFFFFFFFFFFFFFFFFFFFFFFFFFFFFFFFFFFFFFFFFFFFFFFFFFFFFFFFFFFFFFFF  
@A00155:342:HHGFNDSXY:1:2243:4237:23610 1:N:0:GAACCTAG+TCCGCATA  
GATGTAGAGGGCGAGAGAGAGCGACTTCTCTCGGGCCACAGCCTTACAGCTGTGGAGCACGGTATCC  
TCTGCCGAAACAGAGGTTGGACAAGACCGGAGGGGTCTCCTAGTTCAAAGGAGATGTACTCCGGGCT  
+  
FFFFFFFFFFFFFFFFFFFFFFFFFFFFFFFFFFFFFFFFFFFFFFFFFFFFFFFFFFFFFFFFFFFFFFF:FFF  
FFFFFFFFFFFFFFFFFFFFFFFFFFFFFFFFFFFFFFFFFFFFFFFFFFFFFFFFFFFFFFFFFFFFFFF,FFFFFF:FFFFFFFF  
@A00155:342:HHGFNDSXY:1:2244:20166:11397 1:N:0:GAACCTAG+TCCGCATA  
CACCTCTGGCCTATGGTCATCTCAATGCCGAGAGGGATGTGGAGGGCGAGAGAGCGACTTCTCTCG  
GGCCACAGCCTTACAGCTGTGGAGCACGGTATCCTCTGCCGAAACAGAGGTTGGACAAGACCGGAGG  
+  
FFFFFFFFFFFFFFFFFFFFFFFFFFFFFFFFFFFFFFFFFFFFFFFFFFFFFFFFFFFFFFFFFFFFFFFF  
FFFFFFFFFFFFFFFFFFFFFFFFFFFFFFFFFFFFFFFFFFFFFFFFFFFFFFFFFFFFFFFFFFFFFFFF  
@A00155:342:HHGFNDSXY:1:2244:18638:29011 1:N:0:GAACCTAG+TCCGCATA  
GGGCGAGAGAGAGCGACTTCTCTCGGGCCACAGCCTTACAGCTGTGGAGCACGGTATCCTCTGCCGA  
AACAGAGGTTGGACAAGACCGGAGGGGTCTCCTGGTTCAAAGGAGATGTACTCCGGGCTTGTTACG  
+  
FFF:FFFFFFFFFFFFFFFFFFFF:FF,FFF:FFFF:FF:FFFFFFFFFFFFFFFFFFFFFFFFFFFFF  
FFFFFFFFFFFFFFFFFFFFFFFFFFFFFFFFFFFFFFFFFFFFFFFFFFFFFFFFFFFFFFFFFFFFFFFF  
@A00155:342:HHGFNDSXY:1:2244:19108:29450 1:N:0:GAACCTAG+TCCGCATA  
GGGCGAGAGAGAGCGACTTCTCTCGGGCCACAGCCTTACAGCTGTGGAGCACGGTATCCTCTGCCGA  
AACAGAGGTTGGACAAGACCGGAGGGGTCTCCTGGTTCAAAGGAGATGTACTCCGGGCTTGTTACG  
+  
FFFFFFFFFFFFFFFFFFFFFFFFFFFFFFFFFFFFFFFFFFFFFFFFFFFFFFFFFFFFFFFFFFFFFFFF  
FFFFFFFFFFFFFFFFFFFF:FFFFFFFFFFFFFFFFFFFFFFFFFFFFFFFFFFFFFFFFFFFFFFFFFFFF:FF  
@A00155:342:HHGFNDSXY:1:2244:3956:36307 1:N:0:GAACCTAG+TCCGCATA  
GGACTCTCCTCTGGCCTATGGTCATCTCAATGCCGAGAGGGATGTGGAGGGCGAGAGAGAGCGACTTC  
TCTCGGGCCACAGCCTTACAGCTGTGGAGCACGGTATCCTCTGCCGAAACAGAGGTTGGACAAGACC  
+  
FFFFFFFFFFFFFFFFFFFFFFFFFFFFFFFFFFFFFFFFFFFFFFFFFFFFFFFFFFFFFFFFFFFFFFFF  
FFFFFFFFFFFFFFFFFFFFFFFFFFFFFFFFFFFFFFFFFFFFFFFFFFFFFFFFFFFFFFFFFFFFFFFF  
@A00155:342:HHGFNDSXY:1:2245:9146:17895 1:N:0:GAACCTAG+TCCGCATA  
CGACTTCTCTCGGGCCACAGCCTTACAGCTGTGGAGCACGGTATCCTCTGCCGAAACAGAGGTTGGA  
CAAGACCGGAGGGGTCTCCTGGTTCAAAGGAGATGTACTCCGGGCTTGTTACGACCTACCGTGTA  
+  
FFFFFFFFFFFFFFFFFFFFFFFFFFFFFFFFFFFFFFFFFFFFFFFFFFFFFFFFFFFFFFFFFFFFFFFF  
FFFFFFFFFFFFFFFFFFFFFFFFFFFFFFFFFFFFFFFFFFFFFFFFFFFFFFFFFFFFFFFFFFFFFFFF:  
@A00155:342:HHGFNDSXY:1:2245:19117:23265 1:N:0:GAACCTAG+TCCGCATA  
ATCTCAATGCCGAGAGGGATGTGGAGGGCGAGAGAGAGCGACTTCTCTCGGGCCACAGCCTTACAGC  
TGTGGAGCACGGTATCCTCTGCCGAAACAGAGGTTGGTCAAGACCGGAGGGGTCTCCTA  
+  
FFFFFFFFFFFFFF,FFFFFFFFFFFFFFFFFFFFFFFFFFFFFFFFFFFFFFFFFFFFFFFFFFFFFFFF  
FFFFFFFFFFFFFFFFFFFFFFFFFFFFFFFFFFFFFFFFFFFFFFFFFFFFFFFFFFFFFFFFFFFFFFFF:  
@A00155:342:HHGFNDSXY:1:2245:5276:32894 1:N:0:GAACCTAG+TCCGCATA  
TGCCGAGAGGGATGTGGAGGGCGAGAGAGAGCGACTTCTCTCGGGCCACAGCCTTACAGCTGTGGAG  
CACGGTATCCTCTGCCGAAACAGAGGTTGGACAAGACCGGAGGGGTCTCCTAGTTCAAAGGAGATGT  
+  
FFFFFFFFFFFF,FFFFFFFFFFFFFFFFFFFFFFFFFFFFFFFFFFFFFFFFFFFFFFFFFFFFFFFF:  
F:FFF:FFFFFFFFFFFFFFFF:FFFFFFFFFFFFFFFF:FFFFFFFFFFFFFFFF:FFFFFFFFFFFFFFFF  
@A00155:342:HHGFNDSXY:1:2245:5828:35665 1:N:0:GAACCTAG+TCCGCATA  
TCCACTTAAGGACTCACCTCTGGCCTATGGTCATCTCAATGCCGAGAGGGATGTGGAGGGCGAGAGAG  
AGTGACTIONCTCTCGGGCCACAGCCTTACAGCTGTGGAGCACGGTATCCTCTGCCGAAACAGAGGTTG  
+

FFFFFFFFFFFFFFFFFFFFFFFFFFFFFFFFFFFFFFFFFFFFFFFFFFFFFFFFFFFFFFFFFFFFFFFF  
FFFFFFFFFFFFFFFFFFFFFFFFFFFFFFFFFFFFFFFFFFFFFFFFFFFFFFFFFFFFFFFFFFFFFFFF  
@A00155:342:HHGFNDSXY:1:2245:20509:36542 1:N:0:GAACCTAG+TCCGCATA  
GGATGTGGAGGGCGAGAGAGAGCGACTTCTCTCGGGCCACAGCCTTACAGCTGTGGAGCACGGTATC  
CTCTGCCGAAACAGAGGTTGGACAAGACCGGAGGGGTCTCCTAGTTCCAAAGGAGATGTACTCC  
+  
FFFFFFFFFFFFFFFFFFFFFFFFFFFFFFFFFFFFFFFFFFFFFFFFFFFFFFFFFFFFFFFFFFFFFFFF  
FFFFFFFFFFFFFFFFFFFFFFFFFFFFFFFFFFFFFFFFFFFFFFFFFFFFFFFFFFFFFFFFFFFFFFFF  
@A00155:342:HHGFNDSXY:1:2246:6741:12602 1:N:0:GAACCTAG+TCCGCATA  
GGGCGAGAGAGAGCGACTTCTCTCGGGCCACAGCCTTACAGCTGTGGAGCACGGTATCCTCTGCCGA  
AACAGAGGTTGGACAAGACCGGAGGGGTCTCCTAGTTCCAAAGGAGATGTACTCCGGGCTTGTTACG  
+  
FFFFFFFFFFFF:FFFFFFFFFFFFFFFFFFFFFFFFFFFFFFFFFFFFFFFFFFFFFFFFFFFFFFFFFFFFF:FFFFFFFFF:FFFFFFFFF  
FFFFFFFFFFFF:FFFFFFFFFFFFF:FFFFFFFFFFFF:FFFFFFFFF,FFFFFFFFFFFF:F:FFFFFFFFFFFF  
@A00155:342:HHGFNDSXY:1:2246:8585:24502 1:N:0:GAACCTAG+TCCGCATA  
CTCTGCCGAAACAGAGGTTGGACAAGACCGGAGGGGTCTCCTAGTTCCAAAGGAGATGTACTCCGGGC  
TTGTTACGACCTACCGTGTAAGTCGTAGTCTAGTAGGCTACCTGACGAGTCCTTTTTAGGACGAAAC  
+  
F:FFFFFFFFFFFF:FFFFF:FFFFFFFFFFFF:FFFFFFFFFFFFFFFFF:FFFFFFFF,FF:FF:FFFFFFFFFFFF  
FFFF:FFFFF,FFFFFFFFFFFFFFFFFFFFFFFFFFFFF:FFFFFFFFFFFFFFFFFFFFFFFFFFFFF:F:FFFF:F  
@A00155:342:HHGFNDSXY:1:2246:18521:28714 1:N:0:GAACCTAG+TCCGCATA  
GACTTCTCTCGGGCCACAGCCTTACAGCTGTGGAGCACGGTATCCTCTGCCGAAACAGAGGTTGGAC  
AAGACCGGAGGGGTCTCCTAGTTCCAAAGGAGATGTACTCCGGGCTTGTTACGACCTACCGTGTAAG  
+  
FFFFFFFFFFFFFFFFFFFFFFFFFFFFF,FFFFFFFFFFFFFFFFFFFFFFFFFFFFFFFFFFFFFFFFFFFFF  
FFFFFFFFFFFFFFFFFFFFFFFFFFFFFFFFFFFFFFFFFFFFFFFFFFFFFFFFFFFFFFFFFFFFFFFFFFFFF  
@A00155:342:HHGFNDSXY:1:2246:13105:30295 1:N:0:GAACCTAG+TCCGCATA  
TCGGCAGAGGATACCGTGCTCCACAGCTGTAAGGCTGTGGGCCCGAGAGAAGTCGCTCTCTCTCGCCC  
TCCACATCCCTCTCGGCATTGAGATGACCATAGGCCAGAGGTGAGTCCTTAAGTGGACACA  
+  
FFFFFFFFFFFFFFFFFFFFFFFFFFFFFFFFFFFFFFFFFFFFFFFFFFFFFFFFFFFFFFFFFFFFFFFF  
FFFFFFFFFFFFFFFFFFFFFFFFFFFFFFFFFFFFFFFFFFFFFFFFFFFFFFFFFFFFFFFFFFFFFFFFFF:FF  
@A00155:342:HHGFNDSXY:1:2247:15257:10504 1:N:0:GAACCTAG+TCCGCATA  
GAGCGACTTCTCTCGGGCCACAGCCTTACAGCTGTGGAGCACGGTATCCTCTGCCGAAACAGAGGTT  
GGACAAGACCGGAGGGGTCTCCTAGTTCCAAAGGAGATGTACTCCGGGCTTGTTACGACCTACCGTG  
+  
FFFFFFFFFFFFFFFFFFFFFFFFFFFFFFFFFFFFFFFFFFFFFFFFFFFFFFFFFFFFFFFFFFFFFFFF  
FFFFFFFFFFFFFFFFFFFFFFFFFFFFFFFFFFFFFFFFFFFFFFFFFFFFFFFFFFFFFFFFFFFFFFFFFFFFF  
@A00155:342:HHGFNDSXY:1:2247:10538:23218 1:N:0:GAACCTAG+TCCGCATA  
AGCGACTTCTCTCGGGCCACAGCCTTACAGCTGTGGAGCACGGTATCCTCTGCCGAAACAGAGGTTG  
GACAAGACCGGAGGGGTCTCCTGGTTCCAAAGGAGATGTACTCCGGGCTTGTTACGACCTACCGTGT  
+  
FFFFFFFFFFFFFFFFFFFFFFFFFFFFFFFFFFFFFFFFFFFFFFFFFFFFFFFFFFFFFFFFFFFFFFFF  
FFFFFFFFFFFFFFFFFFFFFFFFFFFFFFFFFFFFFFFFFFFFFFFFFFFFFFFFFFFFFFFFFFFFFFFFFFFFF  
@A00155:342:HHGFNDSXY:1:2248:32759:24627 1:N:0:GAACCTAG+TCCGCATA  
TAGACTACGACTTACACGGTAGGTGCTGAACAAGCCCGGAGTACATCTCCTTTGGAACCAGGAGACCC  
CTCCGGTCTTGTTCAACCTCTGTTTCGGCAGAGGATACCGTGCTCCACAGCTGTAAGGCTGTGGGCC  
+  
FFFFFFFFFFFFFFFFFFFFFFFFFFFFFFFFFFFFFFFFFFFFFFFFFFFFFFFFFFFFFFFFFFFFFFFF:FFF  
FFFFFFFFFFFFFFFFFFFFFFFFFFFFFFFFFFFFFFFFFFFFFFFFFFFFFFFFFFFFFFFFFFFFFFFFFFFFF  
@A00155:342:HHGFNDSXY:1:2248:21287:30311 1:N:0:GAACCTAG+TCCGCATA  
TCCTCTGCCGAAACAGAGGTTGGACAAGACCGGAGGGGTCTCCTAGTTCCAAAGGAGATGTACTCCGG  
GCTTGTTACGACCTACCGTGTAAGTCGTAGTCTAGTAGGCTACCTGACGAGTCCTTTTTAGGACGAA  
+



FFFFFFFFFFFFFFFFFFFFFFFFFFFFFFFFFFFFFFFFFFFFFFFFFFFFFFFFFFFFFFFFFFFFFFFF  
FFFFFFFFFFFFFFFFFFFFFFFFFFFFFFFFFFFFFFFFFFFFFFFFFFFFFFFFFFFFFFFFFFFFFFFF:FFFFFFFFFFFFFFFFFFFFFFFFFFFFFFFF  
@A00155:342:HHGFNDSXY:1:2248:23303:36746 1:N:0:GAACCTAG+TCCGCATA  
ATCTCAATGCCGAGAGGGATGTGGAGGGCGAGAGAGAGCGACTTCTCTCGGGCCACAGCCTTACAGC  
TGTGGAGCACGGTATCCTCTGCCGAAACAGAGGTTGGACAAGACCGGAGGGGTCTCCTAGTTCCAAAG  
+  
FFFFFFFFFFFFFFFFFFFFFFFFFFFFFFFFFFFFFFFFFFFFFFFFFFFFFFFFFFFFFFFFFFFFFFFF  
FFFFFFFFFFFFFFFFFFFFFFFFFFFFFFFFFFFFFFFFFFFFFFFFFFFFFFFFFFFFFFFFFFFFFFFF  
@A00155:342:HHGFNDSXY:1:2249:11451:17628 1:N:0:GAACCTAG+TCCGCATA  
ACCTCTGTTTCGGCAGAGGATACCGTGCTCCACAGCTGTAAGGCTGTGGGCCCCGAGAGAAGTCGCTCT  
CTCTCGCCCTCCACATCCCTCTCGGCATTGAGATGACCATAGGCCAGAGGTGAGTCCTTAAGTGGACA  
+  
FFFFFFFFFFFFFFFFFFFFFFFFFFFFFFFFFFFFFFFFFFFFFFFFFFFFFFFFFFFFFFFFFFFFFFFF,FFFFFFFF  
FFFFFFFFFFFFFFFFFFFFFFFFFFFFFFFFFFFFFFFFFFFFFFFFFFFFFFFFFFFFFFFFFFFFFFFF  
@A00155:342:HHGFNDSXY:1:2249:11487:18411 1:N:0:GAACCTAG+TCCGCATA  
ACCTCTGTTTCGGCAGAGGATACCGTGCTCCACAGCTGTAAGGCTGTGGGCCCCGAGAGAAGTCGCTCT  
CTCTCGCCCTCCACATCCCTCTCGGCATTGAGATGACCATAGGCCAGAGGTGAGTCCTTAAGTGGACA  
+  
FFFFFFFFFFFFFFFFFFFFFFFFFFFFFFFFFFFFFFFFFFFFFFFFFFFFFFFFFFFFFFFFFFFFFFFF  
FFFFFFFFFFFFFFFFFFFFFFFFFFFFFFFFFFFFFFFFFFFFFFFFFFFFFFFFFFFFFFFFFFFFFFFF:FFFFF  
@A00155:342:HHGFNDSXY:1:2250:15356:32565 1:N:0:GAACCTAG+TCCGCATA  
ATCTCAATGCCGAGAGGGATGTAGAGGGCGAGAGAGAGCGACTTCTCTCGGGCCACAGCCTTACAGC  
TGTGGAGCACGGTATCCTCTGCCGAAACAGAGGTTGGACAAGACCGGAGGGGTCTCCTAGTTCCAAAG  
+  
FFFFFFFFFFFFFFFFFFFFFFFF:FFFFFFFFFFFFFFFFFFFFFFFFFFFFFFFFFFFFFFFFFFFFFFFF  
FFFFFFFFFFFFFFFFFFFFFFFFFFFFFFFFFFFFFFFFFFFFFFFFFFFFFFFFFFFFFFFFFFFFFFFF  
@A00155:342:HHGFNDSXY:1:2251:24505:20541 1:N:0:GAACCTAG+TCCGCATA  
CTGTGTCCACTTAAGGACTCACCTCTGGCCTATGGTCATCTCAATGCCGAGAGGGATGTGGTGGGCGA  
GAGAGAGCGACTTCTCTCGGGCCACAGCCTTACAGCTGTGGAGCACGGTATCCTCTGCCGAAACAGA  
+  
FFFFFFFFFFFFFFFFFFFFFFFFFFFFFFFFFFFFFFFFFFFFFFFFFFFFFFFFFFFFFFFFFFFFFFFF  
FFFFFFFFFFFFFFFFFFFFFFFFFFFFFFFFFFFFFFFFFFFFFFFFFFFFFFFFFFFFFFFFFFFFFFFF  
@A00155:342:HHGFNDSXY:1:2251:8874:34929 1:N:0:GAACCTAG+TCCGCATA  
GGTATCCTCTGCCGAAACAGAGGTTGGACAAGACCGGAGGGGTCTCCTAGTTCCAAAGGAGATGTACT  
CCGGGCTTGTTACAGACCTACCGTGTAAGTCGTAGTCTAGTAGGCTACCTGACGAGTCCTTTTAGGA  
+  
FFFFFFFFFFFFFFFFFFFFFFFFFFFFFFFFFFFFFFFFFFFFFFFFFFFFFFFFFFFFFFFFFFFFFFFF  
FFFFFFFFFFFFFFFFFFFFFFFFFFFFFFFFFFFFFFFFFFFFFFFFFFFFFFFFFFFFFFFFFFFFFFFF  
@A00155:342:HHGFNDSXY:1:2252:9950:18724 1:N:0:GAACCTAG+TCCGCATA  
GGACTCTCCTCTGGCCTATGGTCATCTCAATGCCGAGAGGGATGTGGAGGGCGAGAGAGAGCGACTTC  
TCTCGGGCCACAGCCTTACAGCTGTGGAGCACGGTATCCTCTGCCGAAACAGAGGTTGGACAAGACC  
+  
FFFFFFFFFFFFFFFFFFFFFFFFFFFFFFFFFFFFFFFFFFFFFFFFFFFFFFFFFFFFFFFFFFFFFFFF  
FFFFFFFFFFFFFFFFFFFFFFFFFFFFFFFFFFFFFFFFFFFFFFFFFFFFFFFFFFFFFFFFFFFFFFFF  
@A00155:342:HHGFNDSXY:1:2252:12662:32628 1:N:0:GAACCTAG+TCCGCATA  
TGTAGAGGGCGAGAGAGAGCGACTTCTCTCGGGCCACAGCCTTACAGCTGTGGAGCACGGTATCCTC  
TGCCGAAACAGAGGTTGGACAAGACCGGAGGGGTCTCCTAGTTCCAAAGGAGATGTACTCCGGG  
+  
FFFFFFFFFFFFFFFFFFFFFFFFFFFFFFFFFFFFFFFFFFFFFFFFFFFFFFFFFFFFFFFFFFFFFFFF  
FFFFFFFFFFFFFFFFFFFFFFFFFFFFFFFFFFFFFFFFFFFFFFFFFFFFFFFFFFFFFFFFFFFFFFFF  
@A00155:342:HHGFNDSXY:1:2252:8241:33833 1:N:0:GAACCTAG+TCCGCATA  
TCCACTTAAGGACTCACCTCTGGCCTATGGTCATCTCAATGCCGAGAGGGATGTGAAGGGCGAGAGAG  
AGCGACTTCTCTCGGGCCACAGCCTTACAGCTGTGGAGCACGGTATCCTCTGCCGAAACAGAGGTTG  
+

FFFFFFFFFFFFFFFFFFFFFFFFFFFFFFFFFFFFFFFFFFFFFFFFFFFFFFFFFFFFFFFFFFFFFFFF  
FFFFFFFFFFFFFFFFFFFFFFFFFFFFFFFFFFFFFFFFFFFFFFFFFFFFFFFFFFFFFFFFFFFFFFFF  
@A00155:342:HHGFNDSXY:1:2253:26630:13636 1:N:0:GAACCTAG+TCCGCATA  
CAATGCCGAGAGGGATGTGGAGGGCGAGAGAGAGCGACTTCTCTCGGGCCCACAGCCTTACAGCTGTG  
GAGCACGGTATCCTCTGCCGAAACAGAGGTTGGACAAGACCGGAGGGGTCTCCTGGTTCCAAAGGAGA  
+  
FFFFFFFFFFFFFFFFFFFFFFFFFFFFFFFFFFFFFFFFFFFFFFFFFFFFFFFFFFFFFFFFFFFFFFFF  
FFFFFFFFFFFFFFFFFFFFFFFFFFFFFFFFFFFFFFFFFFFFFFFFFFFFFFFFFFFFFFFFFFFFFFFF  
@A00155:342:HHGFNDSXY:1:2253:4689:17879 1:N:0:GAACCTAG+TCCGCATA  
CTCGGGCCCACAGCCTTACAGCTGTGGAGCACGGTATCCTCTGCCGAAACAGAGGTTGGACAAGACCG  
GAGGGGTCTCCTAGTTCCAAAGGAGATGTACTCCGGGCTTGTTACGACCTACCGTGTAAGTCGTAGT  
+  
FFFFFFFFFFFFFFFFFFFFFFFFFFFFFFFFFFFFFFFFFFFFFFFFFFFFFFFFFFFFFFFFFFFFFFFF  
FFFFFFFFFFFFFFFFFFFFFFFFFFFFFFFFFFFFFFFFFFFFFFFFFFFFFFFFFFFFFFFFFFFFFFFF  
@A00155:342:HHGFNDSXY:1:2254:28293:4993 1:N:0:GAACCTAG+TCCGCATA  
AGAGAGAGCGACTTCTCTCGGGCCCACAGCCTTACAGCTGTGGAGCACGGTATCCTCTGCCGAAACAG  
AGGTTGGACAAGACCGGAGGGGTCTCCTAGTTCCAAAGGAGATGTACTCCGGGCTTGTTT  
+  
FFFFFFFFFFFFFFFFFFFFFFFFFFFFFFFFFFFFFFFFFFFFFFFFFFFFFFFFFFFFFFFFFFFFFFFF  
FFFFFFFFFFFF:FFFFFFFFFFFFFFFFFFFFFFFFFFFFFFFFFFFFFFFFFFFFFFFFFFFFFFFFFFFF  
@A00155:342:HHGFNDSXY:1:2254:3206:7513 1:N:0:GAACCTAG+TCCGCATA  
GGGCGAGAGAGAGCGACTTCTCTCGGGCCCACAGCCTTACAGCTGTGGAGCACGGTATCCTCTGCCGA  
AACAGAGGTTGGACAAGACCGGAGGGGTCTCCTAGTTCCATAGGAGATGTACTCCGGGCTTGTTACG  
+  
FFFFFFFFFFFF:F,F:FFFFFFFF,FFFF:FF:FFFFFFFF:FFFFFFFFFFFF:FFFFFFFFFFFF  
FFFF:FFFFFFFFFFFFF::FF:FFF,FFF:FFFFFFFF,FFFFFFFFFFFFF:FFFFFFFFFFFF  
@A00155:342:HHGFNDSXY:1:2254:28185:11099 1:N:0:GAACCTAG+TCCGCATA  
GTCATCTCAATGCCGAGAGGGATGTAGAGGGCGAGAGAGAGCGACTTCTCTCGGGCCCACAGCCTTAC  
AGCTGTGGAGCACGGTATCCTCTGCCGAAACAGAGGTTGGACAAGACCGGAGGGGTCTC  
+  
FFFFFFFFFFFFFFFFFFFFFFFFFFFFFFFFFFFFFFFFFFFFFFFFFFFFFFFFFFFFFFFFFFFFFFFF  
FFFFFFFFFFFFFFFFFFFFFFFFFFFFFFFFFFFFFFFFFFFFFFFFFFFFFFFFFFFFFFFFFFFFFFFF  
@A00155:342:HHGFNDSXY:1:2254:2691:12884 1:N:0:GAACCTAG+TCCGCATA  
TCCTCTGCCGAAACAGAGGTTGGACAAGACCGGAGGGGTCTCCTAGTTCCAAAGGAGATGTACTCCGG  
GCTTGTTACGACCTACCGTGTAAGTCGTAGTCTAGTAGGCTACCTGACGAGTCCTTTTAGGACGAA  
+  
FFFFFFFFFFFFFFFFFFFFFFFFFFFFFFFFFFFFFFFFFFFFFFFFFFFFFFFFFFFFFFFFFFFFFFFF  
FFFFFFFFFFFFFFFFFFFFFFFFFFFFFFFFFFFFFFFFFFFFFFFFFFFFFFFFFFFFFFFFFFFFFFFF  
@A00155:342:HHGFNDSXY:1:2254:25843:13432 1:N:0:GAACCTAG+TCCGCATA  
CCACATCCCTCTCGGCATTGAGATGACCATAGGCCAGAGGTGAGTCCTTAAGTGGACACAGCTGATCT  
AAGGCGGTGTGGCGGGCATGGGTTTGAACCCCATGACGGTCGGAGTCTAGTAGGCTCCCTGATGAG  
+  
FFFFFFFFFFFFFFFFFFFFFFFFFFFFFFFFFFFFFFFFFFFFFFFFFFFFFFFFFFFFFFFFFFFFFFFF  
FFFFFFFFFFFFFFFFFFFFFFFFFFFFFFFFFFFFFFFFFFFFFFFFFFFFFFFFFFFFFFFFFFFFFFFF  
@A00155:342:HHGFNDSXY:1:2254:28863:22764 1:N:0:GAACCTAG+TCCGCATA  
GGATGTGGAGGGCGAGAGAGAGCGACTTCTCTCGGGCCCACAGCCTTACAGCTGTGGAGCACGGTATC  
CTCTGCCGAAACAGAGGTTGGACAAGACCGGAGGGGTCTCCTAGTTCCAAAGGAGATGTACTCC  
+  
FFFFFFFFFF:FFFFFFFF:FFFFFFFFFFFFFFFFFFFFFFFFFFFFFFFFFFFFFFFF:FFFFFFFFF:F,FFFFFFFF  
FFFFFFFFFFFFFFFFFFFFFFFF:FFFFFFFFFFFF:FFFFFFFFFFFF,FFFF:FF,FFFFFFFF,F  
@A00155:342:HHGFNDSXY:1:2254:8241:27633 1:N:0:GAACCTAG+TCCGCATA  
GAGCGACTTCTCTCGGGCCCACAGCCTTACAGCTGTGGAGCACGGTATCCTCTGCCGAAACAGAGGTT  
GGACAAGACCGGAGGGGTCTCCTAGTTCCAAAGGAGATGTACTCCGGGCTTGTTACGACCTACCGTG  
+

FFFFFFFFFFFFFFFFFFFFFFFFFFFFFFFFFFFFFFFFFFFFFFFFFFFFFFFFFFFFFFFFFFFFFFFFFFFF  
FFFFFFFFFFFFFFFFFFFFFFFFFFFFFFFFFFFFFFFFFFFFFFFFFFFFFFFFFFFFFFFFFFFFFFFFFFFF, FFFFF: FFFFFFFF  
@A00155:342:HHGFNDSXY:1:2254:9805:27743 1:N:0:GAACCTAG+TCCGCATA  
CTCAATGCCGAGAGGGATGTGGAGGGCGAGAGAGAGCGACTTCTCTCGGGCCCACAGCCTTACAGCTG  
TGGAGCACGGTATCCTCTGCCGAAACAGAGGTTGGACAAGACCGGAGGGGTCTCCTAGTTCCAAAGGA  
+  
FFFFFFFF: FFFFFFFFFFFFF: FFFFFFFFFFFFFFFFFFFFFFFFFFFFFFFFFFFFFFFFFFFFFFFFFFFFFF  
FFFFFFFFFFFF, FFFFFFFFFFFFFFFFFFFFFFFFFFFFFFFFFFFFF, FFFFFFFFFFFFFFFFFFFFFFFFFFFFFF  
@A00155:342:HHGFNDSXY:1:2255:10456:18662 1:N:0:GAACCTAG+TCCGCATA  
ACCTCTGTTTCGGCAGAGGATACCGTGCTCCACAGCTGTAAGGCTGTGGGCCCCGAGAGAAGTCGCTCT  
CTCTCGCCCTCTACATCCCTCTCGGCATTGAGATGACCATAGGCCAGAGGTGAGTCCTTAAGTGGAC  
+  
FFFFFFFFFFFFFFFFFFFFFFFFFFFFFFFFFFFFFFFFFFFFFFFFFFFFFFFFFFFFFFFFFFFFFFFFFFFF  
FFFFFFFFFFFFFFFFFFFFFFFFFFFFFFFFFFFFFFFFFFFFFFFFFFFFFFFFFFFFFFFFFFFFFFFFFFFF  
@A00155:342:HHGFNDSXY:1:2255:24542:29935 1:N:0:GAACCTAG+TCCGCATA  
GAGCGACTTCTCTCGGGCCCACAGCCTTACAGCTGTGGAGCACGGTATCCTCTGCCGAAACAGAGGTT  
GGACAAGACCGGAGGGGTCTCCTGGTTCCAAAGGAGATGTACTCCGGGCTTGTTACAGACCTAC  
+  
FFFFFFFFFFFFFFFFFFFFFFFFFFFFFFFFFFFFFFFFFFFFFFFFFFFFFFFFFFFFFFFFFFFFFFFFFFFF  
FFFFFFFFFFFFFFFFFFFFFFFFFFFFFFFFFFFFFFFFFFFFFFFFFFFFFFFFFFFFFFFFFFFF: : FFFFFFFFFFFFFFFF  
@A00155:342:HHGFNDSXY:1:2255:22896:31782 1:N:0:GAACCTAG+TCCGCATA  
CTTCTCTCGGGCCCACAGCCTTACAGCTGTGGAGCACGGTATCCTCTGCCGAAACAGAGGTTGGACAA  
GACCGGAGGGGTCTCCTGGTTCCAAAGGAGATGTACTCCGGGCTTGTTACAGACCTACCGTGTAAGTC  
+  
FFFFFFFFFFFFFFFFFFFFFFFFFFFFFFFFFFFFFFFFFFFFFFFFFFFFFFFFFFFFFFFFFFFFFFFFFFFF  
FFFFFFFFFFFFFFFFFFFFFFFFFFFFFFFFFFFFFFFFFFFFFFFFFFFFFFFFFFFFFFFFFFFFFFFFFFFF  
@A00155:342:HHGFNDSXY:1:2256:15998:1078 1:N:0:GAACCTAG+TCCGCATA  
TTCTCTCGGGCCCACAGCCTTACAGCTGTGGAGCACGGTATCCTCTGCCGAAACAGAGGTTGGACAAG  
ACCGGAGGGGTCTCCTAGTTCCAAAGGAGATGTACTCCGGGCTTGTTACAGACCTACCGTGTAAGTCG  
+  
FFFFFFFFFFFFFFFFFFFFFFFFFFFFFFFFFFFFFFFFFFFFFFFFFFFFFFFFFFFFFFFFFFFFFFFFFFFF  
FFFFFFFFFFFFFFFFFFFFFFFFFFFFFFFFFFFFFFFFFFFFFFFFFFFFFFFFFFFFFFFFFFFFFFFFFFFF  
@A00155:342:HHGFNDSXY:1:2256:10050:1391 1:N:0:GAACCTAG+TCCGCATA  
GAGCGACTTCTCTCGGGCCCACAGCCTTACAGCTGTGGAGCACGGTATCCTCTGCCGAAACAGAGGTT  
GGACAAGACCGGAGGGGTCTCCTAGTTCCAAAGGAGATGTACTCCGGGCTTGTTACAGACCTACCGTG  
+  
FFFFFFFFFFFFFFFFFFFFFFFFFFFFFFFFFFFF: FFFFFFFFFFFFFFFFFFFFFFFFFFFFFFFFFFFFFF  
FFFFFFFFFFFFFFFFFFFFFFFFFFFFFFFFFFFFFFFFFFFFFFFFFFFFFFFFFFFFFFFFFFFFFFFFFFFF  
@A00155:342:HHGFNDSXY:1:2256:16333:3004 1:N:0:GAACCTAG+TCCGCATA  
CACCTCTGGCCTATGGTCATCTCAATGCCGAGAGGGATGTGAAGGGCGAGAGAGAGCGACTTCTCTCG  
GGCCCACAGCCTTACAGCTGTGGAGCACGGTATCCTCTGCCGAAACAGAGGTTGGACAAGACCGGAGG  
+  
FFFFFFFFFFFFFFFFFFFFFFFFFFFFFFFFFFFFFFFFFFFF: , FFFFFFFFFFFFFFFFFFFFFFFFFFFFFF  
FFFFFFFFFFFF: FFFFFFFFFFFFFFFFFFFFFFFFFFFFFFFFFFFFF, FFFFFFF: FFFFFFFFFFFFFFFF  
@A00155:342:HHGFNDSXY:1:2256:3034:7310 1:N:0:GAACCTAG+TCCGCATA  
TAGATCAGCTGTGTCCACTTAAGGACTCACCTCTGGCCTATGGTCATCTCAATGCCGAGAGGGATGTG  
GAGGGCGAGAGAGAGCGACTTCTCTCGGGCCCACAGCCTTACAGCTGTGGAGCACGGTATCCTCTGCC  
+  
FFFFFFFFFFFFFFFFFFFFFFFFFFFFFFFFFFFFFFFFFFFFFFFFFFFFFFFFFFFFFFFFFFFFFFFFFFFF  
FFFFFFFFFFFFFFFFFFFFFFFFFFFFFFFFFFFFFFFFFFFFFFFFFFFFFFFFFFFFFFFFFFFFFFFFFFFF  
@A00155:342:HHGFNDSXY:1:2256:9995:16203 1:N:0:GAACCTAG+TCCGCATA  
CTCGGGCCCACAGCCTTACAGCTGTGGAGCACGGTATCCTCTGCCGAAACAGAGGTTGGACAAGACCG  
GAGGGGTCTCCTAGTTCCAAAGGAGATGTACTCCGGGCTTGTTACAGACCTACCGTGTAAGTCGTAGT  
+

```

FFFFFFFFFFFFFFFFFFFFFFFFFFFFFFFFFFFFFFFFFFFFFFFFFFFFFFFFFFFFFFFFFFFFFFFFF:FFFFFFFFFFFF,FFFFFFFFFFFFFFFF
FFFFFFFFFFFFFFFFFFFFFFFFFFFFFFFFFFFFFFFFFFFFFFFFFFFFFFFFFFFFFFFFFFFFFFFFF:FFFFFFFFFFFF,FFFFFF:FFFFFFFF:FFFFFFFFFFFFFFFFFFFFFFFFFFFFFFFFF:
@A00155:342:HHGFNDSXY:1:2256:32714:23766 1:N:0:GAACCTAG+TCCGCATA
GGATGTGGAGGGCGAGAGAGAGCGACTTCTCTCGGGCCCACAGCCTTACAGCTGTGGAGCACGGTATC
CTCTGCCGAAACAGAGGTTGGACAAGACCGGAGGGGTCTCCTAGTTCCAAAGGAGATGTACTCC
+
FFFFFFFFFFFFFFFFFFFFFFFFFFFFFFFFFFFFFFFFFFFFFFFFFFFFFFFFFFFFFFFFFFFFFFFFF
FFFFFFFFFFFFFFFFFFFFFFFFFFFFFFFFFFFFFFFFFFFFFFFFFFFFFFFFFFFFFFFFFFFFFFFFF:FFFFFFFFFFFFFFFFFFFFFFFFFFFFFFFFF:FFFFFFFFFFFFFFFF
@A00155:342:HHGFNDSXY:1:2256:4010:29669 1:N:0:GAACCTAG+TCCGCATA
CTTAAGGACTCTCCTCTGGCCTATGGTCATCTCAATGCCGAGAGGGATGTGGAGGGCGAGAGAGAGCG
ACTTCTCTCGGGCCCACAGCCTTACAGCTGTGGAGCACGGTATCCTCTGCCGAAACAGAGGTTGG
+
FFFFFFFFFFFFFFFFFFFFFFFFFFFFFFFFFFFFFFFFFFFFFFFFFFFFFFFFFFFFFFFFFFFFFFFFF
FFFFFFFFFFFFFFFFFFFFFFFFFFFFFFFFFFFFFFFFFFFFFFFFFFFFFFFFFFFFFFFFFFFFFFFFF:FFFF:F
@A00155:342:HHGFNDSXY:1:2256:13521:31735 1:N:0:GAACCTAG+TCCGCATA
ACTTCTCTCGGGCCCACAGCCTTACAGCTGTGGAGCACGGTATCCTCTGCCGAAACAGAGGTTGGACA
AGACCGGAGGGGTCTCCTGGTTCCAAAGGAGATGTACTCCGGGCTTGTTACGACCTACCGTGTAAGT
+
FFFFFFFFFFFF:FFFFFFFF:FF:FFFFFFFF,:FFFF:FFFF:FFFFFF:FFFF:FFFF:FFFFFF:F
FF:F,FFFFFFFFFFFF:FFFFFFFFFFFF:FFFFFFFFFFFF:F:F:FFFFFFFFFFFFFFFFF:,FF:FFFF:
@A00155:342:HHGFNDSXY:1:2257:12102:1219 1:N:0:GAACCTAG+TCCGCATA
ACTTCTCTCGGGCCCACAGCCTTACAGCTGTGGAGCACGGTATCCTCTGCCGAAACAGAGGTTGGACA
AGACCGGAGGGGTCTCCTGGTTCCAAAGGAGATGTACTCCGGGCTTGTTACGACCTACCGTGTAAGT
+
FFFFFFFFFFFFFFFFFFFFFFFFFFFFFFFFFFFFFFFFFFFFFFFFFFFFFFFFFFFFFFFFFFFFFFFFF
FFFFFFFFFFFFFFFFFFFFFFFFFFFFFFFFFFFFFFFFFFFFFFFFFFFFFFFFFFFFFFFFFFFFFFFFF
@A00155:342:HHGFNDSXY:1:2257:18900:16282 1:N:0:GAACCTAG+TCCGCATA
ATCTCTATGCCGAGAGGGATGTGGAGGGCGAGAGAGAGCGACTTCTCTCGGGCCCACAGCCTTACAGC
TGTGGAGCACGGTATCCTCTGCCGAAACAGAGGTTGGACAAGACCGGAGGGGTCTCCTAGTTCCAAAG
+
FFFFFFFFFFFFFFFFFFFFFFFFFFFFFFFFFFFFFFFFFFFFFFFFFFFFFFFFFFFFFFFFFFFFFFFFF
FFFFFFFFFFFFFFFFFFFFFFFFFFFFFFFFFFFFFFFFFFFFFFFFFFFFFFFFFFFFFFFFFFFFFFFFF:FFFFFFFF
@A00155:342:HHGFNDSXY:1:2257:6686:16517 1:N:0:GAACCTAG+TCCGCATA
AAGGACTCACCTCTGGCCTATGGTCATCTCAATGCCGAGAGGGATGTGAAGGGCGAGAGAGAGCGACT
TCTCTCGGGCCCACAGCCTTACAGCTGTGGAGCACGGTATCCTCTGCCGAAACAGAGGTTGGACAAGA
+
FFFFFFFFFFFFFFFFFFFFFFFFFFFFFFFFFFFFFFFFFFFFFFFFFFFFFFFFFFFFFFFFFFFFFFFFF
FFFFFFFFFFFFFFFFFFFFFFFFFFFFFFFFFFFFFFFFFFFFFFFFFFFFFFFFFFFFFFFFFFFFFFFFF,FFFFFFFFFFFFFFFFFFFFFFFFFFFFFFFFF
@A00155:342:HHGFNDSXY:1:2257:18032:17033 1:N:0:GAACCTAG+TCCGCATA
ATCTCTATGCCGAGAGGGATGTGGAGGGCGAGAGAGAGCGACTTCTCTCGGGCCCACAGCCTTACAGC
TGTGGAGCACGGTATCCTCTGCCGAAACAGAGGTTGGACAAGACCGGAGGGGTCTCCTAGTTCCAAAG
+
FFFFFFFFFFFFFFFFFFFFFFFFFFFFFFFFFFFFFFFFFFFFFFFFFFFFFFFFFFFFFFFFFFFFFFFFF:FFFFFFFFFFFFFFFFFFFFFFFF:FFF
FFFFFFFFFFFFFFFFFFFFFFFFFFFFFFFFFFFFFFFFFFFFFFFFFFFFFFFFFFFFFFFFFFFFFFFFF,FFFFFFFFFFFFFFFFFFFFFFFFFFFFFFFFF
@A00155:342:HHGFNDSXY:1:2258:7889:1564 1:N:0:GAACCTAG+TCCGCATA
TTCTCTCGGGCCCACAGCCTTACAGCTGTGGAGCACGGTATCCTCTGCCGAAACAGAGGTTGGACAAG
ACCGGAGGGGTCTCCTAGTTCCAAAGGAGATGTACTCCGGGCTTGTTACGACCTACCGTGTAAGTG
+
FFFFFFFFFFFFFFFFFFFFFFFFFFFFFFFFFFFFFFFFFFFFFFFFFFFFFFFFFFFFFFFFFFFFFFFFF
FFFFFFFFFFFFFFFFFFFFFFFFFFFFFFFFFFFFFFFFFFFFFFFFFFFFFFFFFFFFFFFFFFFFFFFFF:FFFFFFFFFFFFFFFFFFFF:
@A00155:342:HHGFNDSXY:1:2258:8721:20102 1:N:0:GAACCTAG+TCCGCATA
GGAGGGCGAGAGAGAGCGACTTCTCTCGGGCCCACAGCCTTACAGCTGTGGAGCACGGTATCCTCTGC
CGAAACAGAGGTTGGACAAGACCGGAGGGGTCTCCTGGTTCCAAAGGAGATGTACTCCGGGCTTGTT
+

```

FFFFFFFFFFFFFFFFFFFFFFFFFFFFFFFFFFFFFFFFFFFFFFFFFFFFFFFFFFFFFFFFFFFFFFFF  
FF:FFFFFFFFFFFFFFFFFFFFFFFFFFFFFFFFFFFFFFFFFFFFFFFFFFFFFFFFFFFFFFFFFFFFFFFF  
@A00155:342:HHGFNDSXY:1:2258:21603:20964 1:N:0:GAACCTAG+TCCGCATA  
AAGGACTCACCTCTGGCCTATGGTCATCTCAATGCCGAGAGGGATGTGGAGGGCGAGAGAGAGCGACT  
TCTCTCGGGCCCACAGCCTTACAGCTGTGGAGCACGGTATCCTCTGCCGAAACAGAGGTTGGACAAGA  
+  
FFFFFFFFFFFFFFFFFFFFFFFFFFFFFFFFFFFFFFFFFFFFFFFFFFFFFFFFFFFFFFFFFFFFFFFF  
FFFFFFFFFFFFFFFFFFFFFFFFFFFFFFFFFFFFFFFFFFFFFFFFFFFFFFFFFFFFFFFFFFFFFFFF  
@A00155:342:HHGFNDSXY:1:2258:10963:24674 1:N:0:GAACCTAG+TCCGCATA  
TGCCCCACCACACCGCCTTAGATCAGCTGTGTCCACTTAAGGACTCACCTCTGGCCTATGGTCATCTC  
AATGCCGAGAGGGATGTGGAGGGCGAGAGAGAGCGACTTCTCTCGGGCCCACAGCCTTACAGCTGTGG  
+  
FFFFFFFFFFFFFFFFFFFFFFFFFFFFFFFFFFFFFFFFFFFFFFFFFFFFFFFFFFFFFFFFFFFFFFFF  
F:FFFFFFFFFFFFFFF:FFFFFFFFFFFFFFFFFFFFFFF:FFFF:FFFFFFFFFFFFFFF:FFFFFFFFFFFFFFF  
@A00155:342:HHGFNDSXY:1:2258:5556:33786 1:N:0:GAACCTAG+TCCGCATA  
CCAACCTCTGTTTCGGCAGAGGATACCGTGCTCCACAGCTGTAAGGCTGTGGGCCCCGAGAGAAGTCGC  
TCTCTCTCGCCCTCCACATCCCTCTCGGCATTGAGATGACCATAGGCCAGAGGAGAGTCCTTAAGTGG  
+  
FFFF,FFFFFFFF:FFFFFFFFFFFFFFFFFFFFFFFFFFFFFFFFFFFFFFF:FFF,FFF:FF:FFFFFFFFFFFFFFF,FFFF  
FF:FFFFFFFFFFFFFFF,FFFFFFFFFFFFFFF,FFFFFFFFFFFFFFF:FFFFFFFFFFFFFFF:FFFF:FFFF  
@A00155:342:HHGFNDSXY:1:2259:22788:5321 1:N:0:GAACCTAG+TCCGCATA  
TATGGTCATCTCAATGCCGAGAGGGATGTGGAGGGCGAGAGAGAGCGACTTCTCTCGGGCCCACAGCC  
TTACAGCTGTGGAGCACGGTATCCTCTGCCGAAACAGAGGTTGGACAAGACCGGAGGGGTCTCCTAGT  
+  
FFFFFFFFFFFFFFFFFFFFFFFFFFFFFFFFFFFFFFFFFFFFFFFFFFFFFFFFFFFFFFFFFFFFFFFF  
:FFFFFFFFFFFFFFFFFFFFFFFFFFFFFFFFFFFFFFFFFFFFFFFFFFFFFFFFFFFFFFFFFFFFFFFF  
@A00155:342:HHGFNDSXY:1:2259:15953:29904 1:N:0:GAACCTAG+TCCGCATA  
ACCTCTGTTTCGGCAGAGGATACCGTGCTCCACAGCTGTAAGGCTGTGGGCCCCGAGAGAAGTCGCTCT  
CTCTCGCCCTTACATCCCTCTCGGCATTGAGATGACCATAGGCCAGAGGTGAGTCCTTAAGTGGACA  
+  
FFFFFFFFFFFFFFFFFFFFFFFFFFFFFFFFFFFFFFFFFFFFFFFFFFFFFFFFFFFFFFFFFFFFFFFF  
FFFFFFFFFFFFFFFFFFFFFFFFFFFFFFFFFFFFFFFFFFFFFFFFFFFFFFFFFFFFFFFFFFFFFFFF  
@A00155:342:HHGFNDSXY:1:2260:16694:15154 1:N:0:GAACCTAG+TCCGCATA  
GACTTCTCTCGGGCCCACAGCCTTACAGCTGTGGAGCACGGTATCCTCTGCCGAAACAGAGGTTGGAC  
AAGACCGGAGGGGTCTCCTAGTTCCAAAGGAGATGTACTCCGGGCTTGTTACGACCTACCGTGTAAG  
+  
FFFFFFFFFFFFFFFFFFFFFFF:FFFFFFFFFFFFFFFFFFFFFFFFFFFFFFFFFFFFFFFFFFFFFFF:FFFF  
FF:FFFFFFFFFFFFFFFFFFFFFFFFFFFFFFFFFFFFFFFFFFFFFFF,FFFFFFFFFFFFFFFFFFFFFFF  
@A00155:342:HHGFNDSXY:1:2260:2808:19695 1:N:0:GAACCTAG+TCCGCATA  
CCTTACAGCTGTGGAGCACGGTATCCTCTGCCGAAACAGAGGTTGGACAAGACCGGAGGGGTCTCCTA  
GTTCCAAAGGAGATGTACTCCGGGCTTGTTACGACCTACCGTGTAAGTCGTAGTCTAGTAGGCTACC  
+  
FFFFFFFFFFFFFFFFFFFFFFFFFFFFFFFFFFFFFFFFFFFFFFF:FFFFFFFFFFFFFFF:FFFFFFFFFFFFFFFFF  
FFFFFFFFF:FFFFFFFFF:FFFFFFFFFFFFFFFFFFFFF:FF:FFFFFFFFF:FFFFFFFFFFFFFFFFF  
@A00155:342:HHGFNDSXY:1:2261:18656:5243 1:N:0:GAACCTAG+TCCGCATA  
GGATGTGGAGGGCGAGAGAGAGCGACTTCTCTCGGGCCCACAGCCTTACAGCTGAGGAGCACGGTATC  
CTCTGCCGAAACAGAGGTTGGACAAGACCGGAGGGGTCTCCTAGTTCCAAAGGAGATGTACTCC  
+  
FFFFFFFFFFFFFFFFFFFFFFFFFFFFFFFFFFFFFFFFFFFFFFFFFFFFFFFFFFFFFFFFFFFFFFF,FFFFFFFFFFFFFFF  
FFFFFFFFFFFFFFFFFFFFFFFFFFFFFFFFFFFFFFFFFFFFFFFFFFFFFFFFFFFFFFFFFFFFFFFF  
@A00155:342:HHGFNDSXY:1:2261:30092:9142 1:N:0:GAACCTAG+TCCGCATA  
CAGCCTTACAGCTGTGGAGCACGGTTTCTCTGCCGAAACAGAGGTTGGACAAGACCGGAGGGGTCTC  
CTAGTTCCAAAGGAGATGTACTCCGGGCTTGTTACGACCTACCGTGTAAGTCGTAGTCTAGTAGGCT  
+

FFFFFFFFFFFFFFFFFFFFFFFFFFFFFFFFFFFFFFFFFFFFFFFFFFFFFFFFFFFFFFFFFFFFFFFFFFFF  
FFF:FFFFFFFFFFFFFFFFFFFFFFFFFFFFFFFFFFFFFFFFFFFFFFFFFFFFFFFFFFFFFFFFFFFFFFFF  
@A00155:342:HHGFNDSXY:1:2261:28094:9471 1:N:0:GAACCTAG+TCCGCATA  
ATCTCAATGCCGAGAGGGATGTGGAGGGCGAGAGAGAGCGACTTCTCTCGGGCCCACAGCCTTACAGC  
TGTGGAGCACGGTATCCTCTGCCGAAACAGAGGTTGGACAAGACCGGAGGGGTCTCCTGGTTCCAAAG  
+  
FFFFFFFFFFFFFFFFFFFFFFFFFFFFFFFFFFFFFFFFFFFFFFFFFFFFFFFFFFFFFFFFFFFFFFFFFFFF  
FFFFFFFFFFFFFFFFFFFFFFFFFFFFFFFFFFFFFFFFFFFFFFFFFFFFFFFFFFFFFFFFFFFFFFFFFFFF  
@A00155:342:HHGFNDSXY:1:2261:7482:15295 1:N:0:GAACCTAG+TCCGCATA  
GTATCCTCTGCCGAAACAGAGGTTGGACAAGACCGGAGGGGTCTCCTAGTTCCAAAGGAGATGTACTC  
CGGGCTTGTTACGACCTACCGTGTAAGTCGTAGTCTAGTAGGCTACCTGACGAGTCCTTTTTAGGAC  
+  
FFFFFFFFFFFFFFFFFFFFFFFFFFFFFFFFFFFFFFFFFFFFFFFFFFFFFFFFFFFFFFFFFFFFFFFFFFFF  
FFFFFFFFFFFFFFFFFFFFFFFFFFFFFFFFFFFFFFFFFFFFFFFFFFFFFFFFFFFFFFFFFFFFFFFFFFFF  
@A00155:342:HHGFNDSXY:1:2261:9588:27712 1:N:0:GAACCTAG+TCCGCATA  
CAATGCCGAGAGGGATGTGGAGGGCGAGAGAGAGCGACTTCTCTCGGGCCCACAGCCTTACAGCTGTG  
GAGCACGGTATCCTCTGCCGAAACAGAGGTTGGACAAGACCGGAGGGGTCTCCTAGTTCCAAAGGAGA  
+  
FFFFFFFFFFFFFFFFFFFFFFFFFFFFFFFFFFFFFFFFFFFFFFFFFFFFFFFFFFFFFFFFFFFFFFFFFFFF  
FFFFFFFFFFFFFFFFFFFFFFFFFFFFFFFFFFFFFFFFFFFFFFFFFFFFFFFFFFFFFFFFFFFFFFFFFFFF  
@A00155:342:HHGFNDSXY:1:2262:22715:6104 1:N:0:GAACCTAG+TCCGCATA  
AGCGACTTCTCTCGGGCCCACAGCCTTACAGCTGTGGAGCACGGTATCCTCTGCCGAAACAGAGGTTG  
GACAAGACCGGAGGGGTCTCCTAGTTCCAAAGGAGATGTACTCCGGGCTTGTTACGACCTACCGTGT  
+  
FFFFFFFFFFFFFFFFFFFFFFFFFFFFFFFFFFFFFFFFFFFFFFFFFFFFFFFFFFFFFFFFFFFFFFFFFFFF  
FFFFFFFFFFFFFFFFFFFFFFFFFFFFFFFFFFFFFFFFFFFFFFFFFFFFFFFFFFFFFFFFFFFFFFFFFFFF  
@A00155:342:HHGFNDSXY:1:2262:15962:6872 1:N:0:GAACCTAG+TCCGCATA  
CTTACAGCTGTGGAGCACGGTATCCTCTGCCGAAACAGAGGTTGGACAAGACCGGAGGGGTCTCCTAG  
TTCCAAAGGAGATGTACTCCGGGCTTGTTACGACCTACCGTGTAAGTCGTAGTCTAGTAGGCTACCT  
+  
FFFFFFFFFFFFFFFFFFFFFFFFFFFFFFFFFFFFFFFFFFFFFFFFFFFFFFFFFFFFFFFFFFFFFFFFFFFF  
FFFFFFFFFFFFFFFFFFFFFFFFFFFFFFFFFFFFFFFFFFFFFFFFFFFFFFFFFFFFFFFFFFFFFFFFFFFF  
@A00155:342:HHGFNDSXY:1:2262:9372:31000 1:N:0:GAACCTAG+TCCGCATA  
AGAGAGAGCGACTTCTCTCGGGCCCACAGCCTTACAGCTGTGGAGCACGGTATCCTCTGCCGAAACAG  
AGGTTGGACAAGACCGGAGGGGTCTCCTGGTTCCAAAGGAGATGTACTCCGGGCTTGTTACGACCTA  
+  
FFFFFFFFFFFFFFFFFFFFFFFFFFFFFFFFFFFFFFFFFFFFFFFFFFFFFFFFFFFFFFFFFFFFFFFFFFFF  
FFFFFFFFFFFFFFFFFFFFFFFFFFFFFFFFFFFFFFFFFFFFFFFFFFFFFFFFFFFFFFFFFFFFFFFFFFFF  
@A00155:342:HHGFNDSXY:1:2263:14326:16908 1:N:0:GAACCTAG+TCCGCATA  
GGATGTGGAGGGCGAGAGAGAGCGACTTCTCTCGGGCCCACAGCCTTACAGCTGTGGAGCACGGTATC  
CTCTGCCGAAACAGAGGTTGGACAAGACCGGAGGGGTCTCCTAGTTCCAAAGGAGATGTACTCC  
+  
FFF:FFFFFFFFFFFFFFFFFFFFFFFFFFFFFFFFFFFFFFFFFFFFFFFFFFFFFFFFFFFFFFFFFFFFFFFF  
FFFFFFFFFFFFFFFFFFFFFFFFFFFFFFFFFFFFFFFFFFFFFFFFFFFFFFFFFFFFFFFFFFFFFFFFFFFF  
@A00155:342:HHGFNDSXY:1:2263:9815:18270 1:N:0:GAACCTAG+TCCGCATA  
GTCATCTCAATGCCGAGAGGGATGTGGAGGGCGAGAGAGAGCGACTTCTCTCGGGCCCACAGCCTTAC  
AGCTGTGGAGCACGGTATCCTCTGCCGAAACAGAGGTTGGACAAGACCGGAGGGGTCTCCTGGTTCCA  
+  
FFFFFFFFFFFFFFFFFFFFFFFFFFFFFFFFFFFFFFFFFFFFFFFFFFFFFFFFFFFFFFFFFFFFFFFFFFFF  
FFFFFFFFFFFFFFFFFFFFFFFFFFFFFFFFFFFFFFFFFFFFFFFFFFFFFFFFFFFFFFFFFFFFFFFFFFFF  
@A00155:342:HHGFNDSXY:1:2264:22535:18474 1:N:0:GAACCTAG+TCCGCATA  
CAGCCTTACAGCTGTGGAGCACGGTATCCTCTGCCGAAACAGAGGTTGGACAAGACCGGAGGGGTCTC  
CTAGTTCCAAAGGAGATGTACTCCGGGCTTGTTACGACCTACCGTGTAAGTCGTAGTCTAGTAGGCT  
+

FFFFFFFFFFFFFFFFFFFFFFFFFFFFFFFFFFFFFFFFFFFFFFFFFFFFFFFFFFFFFFFFFFFFFFFF  
FF:FFFFFFFFFFFFFFFFFFFFFFFFFFFFFFFFFFFFFFFFFFFFFFFFFFFFFFFFFFFFFFFF:FFFF:FFFFFFFFFFFFFFFFFFFFFFFF  
@A00155:342:HHGFNDSXY:1:2264:22824:20791 1:N:0:GAACCTAG+TCCGCATA  
GTATCCTCTGCCGAAACAGAGGTTGGACAAGACCGGAGGGGTCTCCTAGTTCCAAAGGAGATGTACTC  
CGGGCTTTTTACGACCTACCGTGTAAGTCGTAGTCTAGTAGGCTACCTGACGAGTCCTTTTTAGGAC  
+  
FFFFFFFFFFFFFFFFFFFFFFFFFFFFFFFFFFFFFFFFFFFFFFFFFFFFFFFFFFFFFFFFFFFFFFFF:FFFF:F:FF  
FFFF:FFFFFFFFFFFFFFFFFFFFFFFFFFFFFFFFFFFFFFFFFFFFFFFFFFFFFFFFFFFFFFFF:FFFFF  
@A00155:342:HHGFNDSXY:1:2264:20482:25880 1:N:0:GAACCTAG+TCCGCATA  
CCTCTGTTTCGGCAGAGGATAACCGTGCTCCACAGCTGTAAGGCTGTGGGCCCGAGAGAAGTCGCTCTC  
TCTCGCCCTCCACATCCCTCTCGGCATTGAGATGACCATAGGCCAGAGGTGAGTCCTTAAGTGGACAC  
+  
FFFFFFFFFFFFFFFFFFFFFFFFFFFFFFFFFFFFFFFFFFFFFFFFFFFFFFFFFFFFFFFFFFFFFFFF:FFFFFFFFFFFFFFFFFFFFFFFF  
FFFFFFFFFFFFFFFF:FFF:FFFFFFFFFFFFFFFF:FFFF:FFFFFFFFFFFFFFFFFFFFFFFF:FFFFF  
@A00155:342:HHGFNDSXY:1:2265:10565:12806 1:N:0:GAACCTAG+TCCGCATA  
CTTAAGGACTCACCTCTGGCCTATGGTCATCTCAATGCCGAGAGGGATGTGAAGGGCGAGAGAGAGCG  
ACTTCTCTCGGGCCACAGCCTTACAGCTGTGGAGCACGGTATCCTCTGCCGAAACAGAGGTTGGACA  
+  
FFFFFFFFFFFFFFFFFFFFFFFFFFFFFFFFFFFFFFFFFFFFFFFFFFFFFFFFFFFFFFFFFFFFFFFF:FFFFFFFFFFFFFFFFFFFF  
FF:FFFFFFFFFFFFFFFFFFFFFFFFFFFFFFFFFFFFFFFFFFFFFFFFFFFFFFFFFFFFFFFF:FFF,FFFFFFFFFFFFFFFFFFFF  
@A00155:342:HHGFNDSXY:1:2265:6967:15029 1:N:0:GAACCTAG+TCCGCATA  
ATGCCGAGAGGGCTGTGGAGGGCGAGAGAGAGCGACTTCTCTCGGGCCACAGCCTTACAGCTGTGGA  
GCACGGTATCCTCTGCCGAAACAGAGGTTGGACAAGACCGGAGGGGTCTCCTAGTTCCAAAGGAGATG  
+  
FFF:F:FF:,FF,FFFFFFFF:FFFFFFFFFFFFFFFF:FFFFFFFFFFFFFFFF:FFFF:, ,FFFFFFFF:FFFF:F  
FFFF,F:FF:FFFFFFFF:F:FFFFFFFFFFFFFFFF,FFFFFFFFFFFFFFFF: :F:FFFF:  
@A00155:342:HHGFNDSXY:1:2265:4689:16438 1:N:0:GAACCTAG+TCCGCATA  
GCGACTTCTCTCGGGCCACAGCCTTACAGCTGTGGAGCACGGTATCCTCTGCCGAAACAGAGGTTGG  
ACAAGACCGGAGGGGTCTCCTGGTTCCAAAGGAGATGTACTCCGGGCTTGTTACGACCTACCGTGTA  
+  
FFFFFFFFFFFFFFFFFFFFFFFFFFFFFFFFFFFFFFFFFFFFFFFFFFFFFFFFFFFFFFFFFFFFFFFF:FFFFFFFFFFFFFFFFFFFF  
FFFF:FFFFFFFFFFFFFFFF:FFF:FFFFFFFFFFFFFFFF:FFFFFFFFFFFFFFFF:FFFFFFFFFFFFF  
@A00155:342:HHGFNDSXY:1:2265:19633:30671 1:N:0:GAACCTAG+TCCGCATA  
CATGCCCCGCCACACCGCCTTAGATCAGCTGTGTCCACTTAAGGACTCACCTCTGGCCTATGGTCATC  
TCAATGCCGAGAGGGATGTGGAGGGCGAGAGAGAGCGACTTCTCTCGGGCCACAGCCTTACAGCTGT  
+  
FFFFFFFFFFFFFFFFFFFFFFFFFFFFFFFFFFFFFFFFFFFFFFFFFFFFFFFFFFFFFFFFFFFFFFFF,FFFFFFFFFFFF  
FFFFFFFFFFFFFFFFFFFFFFFFFFFFFFFFFFFFFFFFFFFFFFFFFFFFFFFFFFFFFFFFFFFFFFFFFFFF  
@A00155:342:HHGFNDSXY:1:2265:7681:32550 1:N:0:GAACCTAG+TCCGCATA  
CCACATCCCTCTCGGCATTGAGATGACCATAGGCCAGAGGTGAGTCCTTAAGTGGACACAGCTGATCT  
AAGGCGGTGTGGCGGGCATGGGTTTGAACCCCATGACGGTCGGAGTCTAGTAGGCTCCCTGATGAG  
+  
FFFFFFFFFFFFFFFFFFFFFFFFFFFFFFFFFFFFFFFFFFFFFFFFFFFFFFFFFFFFFFFFFFFFFFFF,FFFFFFFF  
FFFFFFFFFFFFFFFFFFFFFFFFFFFFFFFFFFFFFFFF:FFFFFFFFFFFFFFFF:FFFFFFFFFFFFFFFFFFFF  
@A00155:342:HHGFNDSXY:1:2265:25437:35399 1:N:0:GAACCTAG+TCCGCATA  
ATCTCAATGCCGAGAGGGATGTGGAGGGCGAGAGAGAGCGACTTCTCTCGGGCCACAGCCTTACAGC  
TGTGGAGCACGGTATCCTCTGCCGAAACAGAGGTTGGACAAGACCGGAGGGGTCTCCTAGTTCCAAAG  
+  
FFFFFFFFFFFFFF:FFFFFFFFFFFFFFFFFFFFFFFFFFFFFFFFFFFFFFFFFFFFFFFFFFFFFFFFFFFF  
FFFFFFFFFFFFFFFFFFFFFFFFFFFFFFFFFFFFFFFFFFFFFFFFFFFFFFFFFFFFFFFFFFFFFFFFFFFF  
@A00155:342:HHGFNDSXY:1:2266:18168:29763 1:N:0:GAACCTAG+TCCGCATA  
AATGCCGAGAGGGATGTGGAGGGCGAGAGAGAGCGACTTCTCTCGGGCCACAGCCTTACAGCTGTGG  
AGCACGGTATCCTCTGCCGAAACAGAGGTTGGACAAGACCGGAGGGGTCTCCTAGTTCCAAAGGAGA  
+

FFFFFFFFFFFFFFFFFFFFFFFFFFFFFFFFFFFFFFFFFFFFFFFFFFFFFFFFFFFFFFFFFFFFFFFF  
FFFFFFFFFFFFFFFFFFFFFFFFFFFFFFFFFFFFFFFFFFFFFFFFFFFFFFFFFFFFFFFFFFFFFFFF  
@A00155:342:HHGFNDSXY:1:2267:3188:1846 1:N:0:GAACCTAG+TCCGCATA  
ATGCCGAGAGGGATGTAGAGGGCGAGAGAGCGACTTCTCTCGGGCCCACAGCCTTACAGCTGTGGA  
GCACGGTATCCTCTGCCGAAACAGAGGTTGGACAAGACCGGAGGGGTCTCCTAGTTCCAAAGGAGATG  
+  
FFFFFFFFFFFFFFFF:FFFFFFFFFFFFFFFFFFFFFFFFFFFFFFFFFFFFFFFFFFFFFFFF:FFFFFFFFFFFFFFF  
FFFFFFF:FFFFFFFFFFFFFFFF:FFFF:FFFFFFFF:FF,FFFFFFFFFFFFFFFFFFFFFFFF,FFFFF  
@A00155:342:HHGFNDSXY:1:2267:25111:3427 1:N:0:GAACCTAG+TCCGCATA  
CTCTATGCCGAGAGGGATGTGGAGGGCGAGAGAGCGACTTCTCTCGGGCCCACAGCCTTACAGCTG  
TGGAGCACGGTATCCTCTGCCGAAACAGAGGTTGGACAAGACCGGAGGGGTCTCCTAGTTCCAAAGGA  
+  
FFFFFFFFFFFFFFFFFFFFFFFFFFFFFFFFFFFFFFFFFFFFFFFFFFFFFFFFFFFFFFFFFFFFFFFF  
FFFFFFFFFFFFFFFFFFFFFFFFFFFFFFFFFFFFFFFFFFFFFFFFFFFFFFFFFFFFFFFFFFFFFFFF  
@A00155:342:HHGFNDSXY:1:2267:10285:9064 1:N:0:GAACCTAG+TCCGCATA  
CTCTGCCGAAACAGAGGTTGGACAAGACCGGAGGGGTCTCCTAGTTCCAAAGGAGATGTACTCCGGGC  
TTGTTACGACCTACCGTGTAAGTCGTAGTCTAGTAGGCTACCTGACGAGTCCTTTTTAGGACGAAAC  
+  
FFFFFFFFFFFF:FFFFFFFF:FFFFFFFFFFFFFFFFFFFFFFFFFFFFFFFF:FF:FFFFFFFF::FFFFFFF  
FFFFFFFFFFFFFFFFFFFFFFFF:FFFFFFFFFFFFFFFFFFFFFFFFFFFFFFFF:FFFFFFFFFFFFFFF  
@A00155:342:HHGFNDSXY:1:2267:4065:9502 1:N:0:GAACCTAG+TCCGCATA  
AGGGATGTGGAGGGCGAGAGAGCGACTTCTCTCGGGCCCACAGCCTTACAGCTGTGGAGCACGGTA  
TCCTCTGCCGAAACAGAGGTTGGACAAGACCGGAGGGGTCTCCTAGTTCCAAAGGAAATGTACTCCG  
+  
FFFFF,FFFFFFFFFFFFFFFF:FFFFFFFFFFFFFFFFFFFFFFFFFFFFFFFFFFFFFFFFFFFFFFFF  
FFFFFFFFFFFFFFFF:FFFFFFFFFFFFFFFF:FFFFFFFFFFFFFFFFFFFFFFFFFFFFFFFF  
@A00155:342:HHGFNDSXY:1:2267:27877:10191 1:N:0:GAACCTAG+TCCGCATA  
GGATGTGGAGGGCGAGAGAGCGACTTCTCTCGGGCCCACAGCCTTACAGCTGTGGAGCACGGTATC  
CTCTGCCGAAACAGAGGTTGGACAAGACCGGAGGGGTCTCCTAGTTCCAAAGGAGATGTACTCC  
+  
FFFFF,FFFF::FFFFFFFF:FFFF:FFFF:FFFFFFFF:F:FFFFFFFF:FFFFF:  
:FFF:F,FFFFFFFF:F,FFFFFFFF,FF:FF:FFFFFFFF:FFFFFFFF:FF:FFF  
@A00155:342:HHGFNDSXY:1:2267:3830:30264 1:N:0:GAACCTAG+TCCGCATA  
CACCTCTGGCCTATGGTCATCTCAATGCCGAGAGGGATGTGGAGGGCGAGAGAGCGACTTCTCTCG  
GGCCCACAGCCTTACAGCTGTGGAGCACGGTATCCTCTGCCGAAACAGAGGTTGGACAAGACCGGAG  
+  
FFFFFFFFFFFFFFFFFFFFFFFFFFFFFFFFFFFFFFFFFFFFFFFFFFFFFFFFFFFFFFFFFFFFFFFF  
FFFFFFFFFFFFFFFFFFFFFFFFFFFFFFFFFFFFFFFFFFFFFFFFFFFFFFFFFFFFFFFFFFFFFFFF  
@A00155:342:HHGFNDSXY:1:2268:28275:9345 1:N:0:GAACCTAG+TCCGCATA  
GAGAGGGATGTGGAGGGCGAGAGAGCGACTTCTCTCGGGCCCACAGCCTTACAGCTGTGGAGCACG  
GTATCCTCTGCCGAAACAGAGGTTGGACAAGACCGGAGGGGTCTCCTAGTTCCAAAGGAGATGTACTC  
+  
FFFFFFFFFFFFFFFFFFFFFFFFFFFFFFFFFFFFFFFFFFFFFFFFFFFFFFFFFFFFFFFFFFFFFFFF  
FFFFFFFFFFFFFFFFFFFFFFFFFFFFFFFFFFFFFFFFFFFFFFFFFFFFFFFFFFFFFFFFFFFFFFFF:FFF  
@A00155:342:HHGFNDSXY:1:2269:5683:4883 1:N:0:GAACCTAG+TCCGCATA  
TTCTCTCGGGCCCACAGCCTTACAGCTGTGGAGCACGGTATCCTCTGCCGAAACAGAGGTTGGACAAG  
ACCGGAGGGGTCTCCTAGTTCCAAAGGAGATGTACTCCGGGCTTGTTACGACCTACCGTGTAAGTC  
+  
FFFFFFFFFFFFFFFFFFFFFFFFFFFFFFFFFFFFFFFFFFFFFFFFFFFFFFFFFFFFFFFFFFFFFFFF  
FFFFFFFFFFFFFFFFFFFFFFFFFFFFFFFFFFFFFFFFFFFFFFFFFFFFFFFFFFFFFFFFFFFFFFFF  
@A00155:342:HHGFNDSXY:1:2269:17300:14575 1:N:0:GAACCTAG+TCCGCATA  
GGACTCTCCTCTGGCCTATGGTCATCTCAATGCCGAGAGGGATGTGGAGGGCGAGAGAGCGACTTC  
TCTCGGGCCCACAGCCTTACAGCTGTGGAGCACGGTATCCTCTGCCGAAACAGAGGTTGGACAAGACC  
+



[illegible]

FFFFFFFF::FFFFFF::FFFFFFFF:F,FF,FFF::F,FF,FF:F:FFF,F:F:F:FFFFFFFF,FF::FF  
FFFFFFFFFFFFFFFFFFFFFF:FFF::F:FFFFFFFFFFFFFF:FFFFFFFF:FFFF:FFFF::FFFF:  
@A00155:342:HHGFNDSXY:1:2271:10520:9721 1:N:0:GAACCTAG+TCCGCATA  
TTACAGCTGTGGAGCACGGTATCCTCTGCCGAAACAGAGGTTGGACAAGACCGGAGGGGTCTCCTAGT  
TCCAAAGGAGATGTACTCCGGGCTTGTTACGACCTACCGTGTAAGTCGTAGTCTAGTAGGCTACCTG  
+  
FFFFFFFF:FFFFFFFFFFFFFFFFFFFFFFFFFFFFFFFFFFFFFFFFFFFFFFFFFFFFFFFFFFFFFFFF:  
FFFFFFFFFFFFFFFF:FFFFFFFFFFFFFFFFFFFFFFFFFFFFFFFFFFFFFFFFFFFFFFFFFFFFFFFF:FFFF:FFFF  
@A00155:342:HHGFNDSXY:1:2271:27109:11898 1:N:0:GAACCTAG+TCCGCATA  
ACTTCTCTCGGGCCACAGCCTTACAGCTGTGGAGCACGGTATCCTCTGCCGAAACAGAGGTTGGACA  
AGACCGGAGGGGTCTCCTAGTTCCAAAGGAGATGTACTCCGGGCTTGTTACGACCTACCGTGTAAGT  
+  
FFFFFFFFFFFFFFFFFFFFFFFFFFFFFFFFFFFFFFFFFFFFFFFFFFFFFFFFFFFFFFFFFFFFFFFF  
FFFF:FFFFFFFFFFFFFFFFFFFFFFFFFFFFFFFFFFFFFFFFFFFFFFFFFFFFFFFFFFFFFFFFFFFF  
@A00155:342:HHGFNDSXY:1:2271:27163:13338 1:N:0:GAACCTAG+TCCGCATA  
ACTTCTCTCGGGCCACAGCCTTACAGCTGTGGAGCACGGTATCCTCTGCCGAAACAGAGGTTGGACA  
AGACCGGAGGGGTCTCCTAGTTCCAAAGGAGATGTACTCCGGGCTTGTTACGACCTACCGTGTAAGT  
+  
FFFFFFFFFFFFFFFFFFFFFFFFFFFFFFFFFFFFFFFFFFFFFFFFFFFFFFFFFFFFFFFFFFFFFFFF  
FF:FFFFFFFFFFFFFFFFFFFFFFFFFFFFFFFFFFFFFFFFFFFFFFFFFFFFFFFFFFFFFFFFFFFF,FFFFFFFF:FFFFFFFFFFFFFFFF  
@A00155:342:HHGFNDSXY:1:2271:31720:15374 1:N:0:GAACCTAG+TCCGCATA  
GGATGTGGAGGGCGAGAGAGAGCGACTTCTCTCGGGCCACAGCCTTACAGCTGTGGAGCACGGTATC  
CTCTGCCGAAACAGAGGTTGGACAAGACCGGAGGGGTCTCCTAGTTCCAAAGGAGATGTACTCC  
+  
FFFFFFFFFFFFFFFFFFFFFFFFFFFFFFFF,FFFFFFFFFFFFFFFFFFFFFFFFFFFFFFFFFFFFFFFFFFFF  
FFFFFFFFFFFFFFFFFFFFFFFFFFFFFFFFFFFFFFFFFFFFFFFFFFFFFFFFFFFFFFFFFFFFFFFFFFFF  
@A00155:342:HHGFNDSXY:1:2271:5213:32221 1:N:0:GAACCTAG+TCCGCATA  
GAGGGCGAGAGAGAGCGACTTCTCTCGGGCCACAGCCTTACAGCTGTGGAGCACGGTATCCTCTGCC  
GAAACAGAGGTTGGACAAGACCGGAGGGGTCTCCTAGTTCCAAAGGAGATGTACTCCGGGCTTGTTCA  
+  
FFFFFFFF:FFFFFFFFFFFFFF:FFFFFFFFFFFFFFFFFFFFFFFFFFFFFFFFFFFFFFFFFFFFFFFF  
FFFFFFFFFFFFFFFFFFFFFFFFFFFFFFFFFFFFFFFFFFFFFFFFFFFFFFFFFFFFFFFFFFFFFFFFFFFF  
@A00155:342:HHGFNDSXY:1:2272:18041:3959 1:N:0:GAACCTAG+TCCGCATA  
ATGCCGAGAGGGATGTGGAGGGCGAGAGAGAGCGACTTCTCTCGGGCCACAGCCTTACAGCTGTGGA  
GCACGGTATCCTCTGCCGAAACAGAGGTTGGACAAGACCGGAGGGGTCTCCTAGTTCCAAAGGAGATG  
+  
FFFFFFFFFFFFFFFFFFFFFFFFFFFFFFFFFFFFFFFFFFFFFFFFFFFFFFFFFFFFFFFFFFFFFFFF  
FFFFFFFFFFFFFFFFFFFFFFFFFFFFFFFFFFFFFFFFFFFFFFFFFFFFFFFFFFFFFFFFFFFFFFFFFFFF  
@A00155:342:HHGFNDSXY:1:2272:29767:15499 1:N:0:GAACCTAG+TCCGCATA  
CTTCTCTCGGGCCACAGCCTTACAGCTGTGGAGCACGGTATCCTCTGCCGAAACAGAGGTTGGACAA  
GACCGGAGGGGTCTCCTAGTTCCAAAGGAGATGTACTCCGGGCTTGTTACGACCTACCGTGTAAGTC  
+  
FFFF,F,FFFF::FFF:FFF,FFF:FFFFFFFFFFFFFF:F,FF,FFF:FFFFFFFFFFFF,FFFFFFFF  
FFFF:,FFFF:FFFF,FFFFFFFF::FFFFFFFF,F:F:FFFFFFFF:FFFFFFFF,FF::FFF,:  
@A00155:342:HHGFNDSXY:1:2272:8865:26647 1:N:0:GAACCTAG+TCCGCATA  
ACCTCTGTTTCGGCAGAGGATACCGTGCTCCACAGCTGTAAGGCTGTGGGCCCCGAGAGAAGTCGCTCT  
CTCTCGCCCTCCACATCCCTCTCGGCATTGAGATGACCATAGGCCAGAGGAGAGTCCTTAAGTGGACA  
+  
FFFFFFFFFFFFFFFFFFFFFFFFFFFFFFFFFFFFFFFFFFFFFFFFFFFFFFFFFFFFFFFFFFFFFFFF  
FFFFFFFFFFFFFFFFFFFFFFFFFFFFFFFFFFFFFFFFFFFFFFFFFFFFFFFFFFFFFFFFFFFFFFFFFFFF  
@A00155:342:HHGFNDSXY:1:2272:14145:28745 1:N:0:GAACCTAG+TCCGCATA  
GGATGTGGAGGGCGAGAGAGAGCGACTTCTCTCGGGCCACAGCCTTACAGCTGTGGAGCACGGTATC  
CTCTGCCGAAACAGAGGTTGGACAAGACCGGAGGGGTCTCCTAGTTCCAAAGGAG  
+

FFFFFFFFFFFFFFFFFFFFFFFFFFFFFFFFFFFFFFFFFFFFFFFFFFFFFFFFFFFFFFFFFFFFFFFF  
FFFFFFFFFFFFFFFFFFFFFFFFFFFFFFFFFFFFFFFFFFFFFFFFFFFFFFFFFFFFFFFFFFFFFFFF  
@A00155:342:HHGFNDSXY:1:2272:9769:32941 1:N:0:GAACCTAG+TCCGCATA  
ACCTCTGTTTCGGCAGAGGATACCGTGCTCCACAGCTGTAAGGCTGTGGGCCCCGAGAGAAGTCGCTCT  
CTCTCGCCCTCCACATCCCTCTCGGCATTGAGATGACCATAGGCCAGAGGAGAGTCCTTAAGTGGACA  
+  
FFFFFFFFFFFFFFFFFFFFFFFFFFFFFFFFFFFFFFFFFFFFFFFFFFFFFFFFFFFFFFFFFFFFFFFF:FFFFFFFFFFFFFFFFFFFFFFFF  
FFFFFFFFFFFFFFFFFFFFFFFFFFFFFFFFFFFFFFFFFFFFFFFFFFFFFFFFFFFFFFFFFFFFFFFFFFFFFFFF:FFFFFFFFFFFFFFFF  
@A00155:342:HHGFNDSXY:1:2272:4942:35133 1:N:0:GAACCTAG+TCCGCATA  
ACCTCTGTTTCGGCAGAGGATACCGTGCTCCACAGCTGTAAGGCTGTGGGCCCCGAGAGAAGTCGCTCT  
CTCTCGCCCTCCACATCCCTCTCGGCATTGAGATGACCATAGGCCAGAGGTGAGTCCTTAAGTGGACA  
+  
FFFFFFFFFFFFFFFFFFFFFFFFFFFFFFFFFFFFFFFFFFFFFFFFFFFFFFFFFFFFFFFFFFFFFFFFFFFFFFFFFFFFFFFFFFFFFFFF  
FFFFFFFFFFFFFFFFFFFFFFFFFFFFFFFFFFFFFFFFFFFFFFFFFFFFFFFFFFFFFFFFFFFFFFFFFFFFFFFFFFFFFFFFFFFFFFFF  
@A00155:342:HHGFNDSXY:1:2272:18484:36824 1:N:0:GAACCTAG+TCCGCATA  
AATGCCGAGAGGGATGTGGAGGGCGAGAGAGAGCGACTTCTCTCGGGCCCCACAGCCTTACAGCTGTGG  
AGCACGGTATCCTCTGCCGAAACAGAGGTTGGACAAGACCGGAGGGGTCTCCTGGTTCCAAAGGAGAT  
+  
FFFFFFFFFFFFFFFFFFFFFFFFFFFFFFFFFFFFFFFFFFFFFFFFFFFFFFFFFFFFFFFFFFFFFFFFFFFFFFFFFFFFFFFFFFFFFFFF  
FFFFFFFFFFFFFFFFFFFFFFFFFFFFFFFFFFFFFFFFFFFFFFFFFFFFFFFFFFFFFFFFFFFFFFFFFFFFFFFFFFFFFFFFFFFFFFFF  
@A00155:342:HHGFNDSXY:1:2273:19298:8829 1:N:0:GAACCTAG+TCCGCATA  
GGATGTGGAGGGCGAGAGAGAGCGACTTCTCTCGGGCCCCACAGCCTTACAGCTGTGGAGCACGGTATC  
CTCTGCCGAAACAGAGGTTGGACAAGACCGGAGGGGTCTCCTAGTTCCAAAGGAGATGTACTCC  
+  
FFFFFFFFFFFFFFFFFFFFFFFFFFFFFFFFFFFFFFFFFFFFFFFFFFFFFFFFFFFFFFFFFFFFFFFFFFFFFFFFFFFFFFFFFFFFFFFF  
FFFFFFFFFFFFFFFFFFFFFFFFFFFFFFFFFFFFFFFFFFFFFFFFFFFFFFFFFFFFFFFFFFFFFFFFFFFFFFFFFFFFFFFFFFFFFFFF  
@A00155:342:HHGFNDSXY:1:2273:19407:11083 1:N:0:GAACCTAG+TCCGCATA  
GAGGGCGAGAGAGAGCGACTTCTCTCGGGCCCCACAGCCTTACAGCTGTGGAGCACGGTATCCTCTGCC  
GAAACAGAGGTTGGACAAGACCGGAGGGGTCTCCTAGTTCCAAAGGAGATGTACTCCGGGCTTGTTC  
+  
FFFFFFFFFFFFFFFFFFFFFFFFFFFFFFFFFFFFFFFFFFFFFFFFFFFFFFFFFFFFFFFFFFFFFFFFFFFFFFFFFFFFFFFFFFFFFFFF  
FFFFFFFFFFFFFFFFFFFFFFFFFFFFFFFFFFFFFFFFFFFFFFFFFFFFFFFFFFFFFFFFFFFFFFFFFFFFFFFFFFFFFFFFFFFFFFFF  
@A00155:342:HHGFNDSXY:1:2273:2239:29262 1:N:0:GAACCTAG+TCCGCATA  
TTAAGGACTCTCCTCTGGCCTATGGTCATCTCAATGCCGAGAGGGATGTGGAGGGCGAGAGAGAGCGA  
CTTCTCTCGGGCCCCACAGCCTTACAGCTGTGGAGCACGGTATCCTCTGCCGAAACAGAGGTTGGACAA  
+  
FFFFFFFFF:FFFFFFFFFFFFFFFFFFFFFFFFFFFFFFFFFFFFFFFFFFFFFFFFFFFFFFFFFFFFFFFFFFFFFFFFFFFFFFFF:FFFF:FFFF:FFF,  
:FFFFFFFFFFFFFFFFFFFFFFFFFFFFFFFFFFFFFFFFFFFFFFFFFFFFFFFFFFFFFFFFFFFFFFFFFFFFFFFF:FFFF:FFFF,FFF:FFFFFFFF  
@A00155:342:HHGFNDSXY:1:2273:29432:31391 1:N:0:GAACCTAG+TCCGCATA  
CTTCTCTCGGGCCCCACAGCCTTACAGCTGTGGAGCACGGTATCCTCTGCCGAAACAGAGGTTGGACAA  
GACCGGAGGGGTCTCCTAGTTCCAAAGGAGATGTACTCCGGGCTTGTTACGACCTACCGTGTAAGTC  
+  
FFFFFFFFFFFFFFFFFFFFFFFFFFFFFFFFFFFFFFFFFFFFFFFFFFFFFFFFFFFFFFFFFFFFFFFFFFFFFFFFFFFFFFFFFFFFFFFF  
FFFFFFFFFFFFFFFFFFFFFFFFFFFFFFFFFFFFFFFFFFFFFFFFFFFFFFFFFFFFFFFFFFFFFFFFFFFFFFFFFFFFFFFFFFFFFFFF  
@A00155:342:HHGFNDSXY:1:2273:27416:36417 1:N:0:GAACCTAG+TCCGCATA  
TTCTCTCGGGCCCCACAGCCTTACAGCTGTGGAGCACGGTATCCTCTGCCGAAACAGAGGTTGGACAAG  
ACCGGAGGGGTCTCCTAGTTCCAAAGGAGATGTACTCCGGGCTTGTTACGACCTACCGTGTAAGTCG  
+  
FFFFFFFFFFFFFFFFFFFFFFFFFFFFFFFFFFFFFFFFFFFFFFFFFFFFFFFFFFFFFFFFFFFFFFFFFFFFFFFFFFFFFFFFFFFFFFFF:  
FFFFFFFFFFFFFFFFFFFFFFFFFFFFFFFFFFFFFFFFFFFFFFFFFFFFFFFFFFFFFFFFFFFFFFFFFFFFFFFFFFFFFFFFFFFFFFFF  
@A00155:342:HHGFNDSXY:1:2274:19605:17691 1:N:0:GAACCTAG+TCCGCATA  
ACCTCTGTTTCGGCAGAGGATACCGTGCTCCACAGCTGTAAGGCTGTGGGCCCCGAGAGAAGTCGCTCT  
CTCTCGCCCTCCACATCCCTCTCGGCATTGAGATGACCATAGGCCAGAGGAGAGTCCTTAAGT  
+

FFFFFFFFFFFFFFFFFFFFFFFFFFFFFFFFFFFFFFFFFFFFFFFFFFFFFFFFFFFFFFFFFFFFFFFF  
FFFFFFFFFFFFFFFFFFFFFFFFFFFFFFFFFFFFFFFFFFFFFFFFFFFFFFFFFFFFFFFFFFFFFFFF  
@A00155:342:HHGFNDSXY:1:2275:12472:15421 1:N:0:GAACCTAG+TCCGCATA  
TTGTCCAACCTCTGTTTCGGCAGAGGATACCGTGCTCCACAGCTGTAAGGCTGTGGGCCCGAGAGAAG  
TCGCTCTCTCTCGCCCTTCACATCCCTCTCGGCATTGAGATGACCATAGGCCAGAGGTGAGTCCTTAA  
+  
FFFFFFFFFFFFFFFFFFFFFFFFFFFFFFFFFFFFFFFFFFFFFFFFFFFFFFFFFFFFFFFFFFFFFFFF  
FFFFFFFFFFFFFFFFFFFFFFFFFFFFFFFFFFFFFFFFFFFFFFFFFFFFFFFFFFFFFFFFFFFFFFFF  
@A00155:342:HHGFNDSXY:1:2275:16414:30639 1:N:0:GAACCTAG+TCCGCATA  
CTTCTCTCGGGCCCACAGCCTTACAGCTGTGGAGCACGGTATCCTCTGCCGAAACAGAGGTTGGACAA  
GACCGGAGGGGTCTCCTAGTTCCAAAGGAGATGTACTCCGACTTGTTACGACCTACCGTGTAAGTC  
+  
FFFFFFFFFFFFFFFFFFFFFFFF:FFFFFFFFFFFFFFFFFFFFFFFFFFFFFFFFFFFFFFFFFFFFFFFF  
FFFFFFFFFFFFFFFFFFFFFFFFFFFFFFFFFFFFFFFFFFFFFFFFFFFFFFFFFFFFFFFFFFFFFFFF  
@A00155:342:HHGFNDSXY:1:2275:18502:33098 1:N:0:GAACCTAG+TCCGCATA  
GGGCGAGAGAGAGCGACTTCTCTCGGGCCCACAGCCTTACAGCTGTGGAGCACGGTATCCTCTGCCGA  
AACAGAGGTTGGACAAGACCGGAGGGGTCTCCTAGTTCCAAAGGAGATGTACTCCGGGCTTGTTACG  
+  
FFFFFFFFFFFFFFFFFFFFFFFF:FFFFFFFFFFFFFFFFFFFFFFFFFFFFFFFFFFFFFFFFFFFFFFFF  
FFFFFFFFFFFFFFFFFFFFFFFFFFFFFFFFFFFFFFFFFFFFFFFFFFFFFFFFFFFFFFFFFFFFFFFF,FF  
@A00155:342:HHGFNDSXY:1:2276:16839:3317 1:N:0:GAACCTAG+TCCGCATA  
ATCCTCTGCCGAAACAGAGGTTGGACAAGACCGGAGGGGTCTCCTAGTTCCAAAGGAGATGTACTCCG  
GGCTTGTTACGACCTACCGTGTAAGTCGTAGTCTAGTAGGCTACCTGACGAGTCCTTTTATAGGACGA  
+  
FFFFFFFFFFFFFFFFFFFFFFFFFFFFFFFFFFFFFFFFFFFFFFFFFFFFFFFFFFFFFFFFFFFFFFFF  
FFFFFFFFFFFFFFFFFFFFFFFFFFFFFFFF:FFFFFFFFFFFFFFFFFFFFFFFFFFFFFFFFFFFFFFFF  
@A00155:342:HHGFNDSXY:1:2276:28438:9721 1:N:0:GAACCTAG+TCCGCATA  
CTCAATGCCGAGAGGGATGTGGAGGGCGAGAGAGAGCGACTTCTCTCGGGCCCACAGCCTTACAGCTG  
TGGAGCACGGTATCCTCTGCCGAAACAGAGGTTGGACAAGACCGGAGGGGTCTCCTAGTTCCAAAGGA  
+  
FFFFFFFFFFFFFFFFFFFFFFFFFFFFFFFFFFFFFFFFFFFFFFFFFFFFFFFFFFFFFFFFFFFFFFFF  
FFFFFFFFFFFFFFFFFFFFFFFFFFFFFFFFFFFFFFFFFFFFFFFFFFFFFFFFFFFFFFFFFFFFFFFF:FF  
@A00155:342:HHGFNDSXY:1:2276:8151:17581 1:N:0:GAACCTAG+TCCGCATA  
CCTTACAGCTGTGGAGCACGGTATCCTCTGCCGAAACAGAGGTTGGACAAGACCGGAGGGGTCTCCTA  
GTTCCAAAGGAAATGTACTCCGGGCTTGTTACGACCTACCGTGTAAGTCGTAGTCTAGTAGGCTACC  
+  
FFFFFFFFFFFFFFFFFFFFFFFFFFFFFFFFFFFFFFFFFFFFFFFFFFFFFFFFFFFFFFFFFFFFFFFF  
FFFFFFFFFFFFFFFFFFFFFFFFFFFFFFFFFFFFFFFFFFFFFFFFFFFFFFFFFFFFFFFFFFFFFFFF:FFF:FFFFFFFFFFFFFFFFFFFFFFFF  
@A00155:342:HHGFNDSXY:1:2276:18249:27680 1:N:0:GAACCTAG+TCCGCATA  
TCCTCTGCCGAAACAGAGGTTGGACAAGACCGGAGGGGTCTCCTGGTTCCAAAGGAGATGTACTCCGG  
GCTTGTTACGACCTACCGTGTAAGTCGTAGTCTAGTAGGCTACCTGACGAGTCCTTTTATAGGACGAA  
+  
FFFFFFFFFFFFFFFFFFFFFFFFFFFFFFFFFFFFFFFFFFFFFFFFFFFFFFFFFFFFFFFFFFFFFFFF  
FFFFFFFFFFFFFFFFFFFFFFFFFFFFFFFFFFFFFFFFFFFFFFFFFFFFFFFFFFFFFFFFFFFFFFFF:F:FFFFFF:FF  
@A00155:342:HHGFNDSXY:1:2276:20148:33724 1:N:0:GAACCTAG+TCCGCATA  
CTCAATGCCGAGAGGGATGTGGAGGGCGAGAGAGAGCGACTTCTCTCGGGCCCACAGCCTTACAGCTG  
TGGAGCACGGTATCCTCTGCCGAAACAGAGGTTGGACAAGACCGGAGGGGTCTCCTAGTTCCAAAGGA  
+  
FFFFFFFFFFFFFFFFFFFFFFFFFFFFFFFFFFFFFFFFFFFFFFFFFFFFFFFFFFFFFFFFFFFFFFFF  
FFFFFFFFFFFFFFFFFFFFFFFFFFFFFFFFFFFFFFFFFFFFFFFFFFFFFFFFFFFFFFFFFFFFFFFF  
@A00155:342:HHGFNDSXY:1:2277:25590:4038 1:N:0:GAACCTAG+TCCGCATA  
AGCGACTTCTCTCGGGCCCACAGCCTTACAGCTGTGGAGCACGGTATCCTCTGCCGAAACAGAGGTTG  
GACAAGACCGGAGGGGTCTCCTAGTTCCAAAGGAGATGTACTCCGGGCTTGTTACGACCTACCGTGT  
+

FFFFFFFFFFFFFFFFFFFFFFFFFFFFFFFFFFFFFFFFFFFFFFFFFFFFFFFFFFFFFFFFFFFFFFFFFFFFFFFF  
FFFFFFFFFFFFFFFFFFFFFFFFFFFFFFFFFFFFFFFFFFFFFFFFFFFFFFFFFFFFFFFFFFFFFFFFFFFFFFFF:FF  
@A00155:342:HHGFNDSXY:1:2277:16938:4554 1:N:0:GAACCTAG+TCCGCATA  
TGGTCATCTCAATGCCGAGAGGGATGTGGAGGGCGAGAGAGAGCGACTTCTCTCGGGCCCACAGCCTT  
ACAGCTGTGGAGCACGGTATCCTCTGCCGAAACAGAGGTTGGACAAGACCGGAGGGGTCTCCTAGTTCC  
+  
FFFFFFFFFFFFFFFFFFFFFFFFFFFFFFFFFFFFFFFFFFFFFFFFFFFFFFFFFFFFFFFFFFFFFFFFFFFFFFFF  
FFFFFFFFFFFFFFFFFFFFFFFFFFFFFFFFFFFFFFFFFFFFFFFFFFFFFFFFFFFFFFFFFFFFFFFFFFFFFFFF  
@A00155:342:HHGFNDSXY:1:2277:2889:14450 1:N:0:GAACCTAG+TCCGCATA  
AATGCCGAGAGGGATGTAGAGGGCGAGAGAGAGCGACTTCTCTCGGGCCCACAGCCTTACAGCTGTGG  
AGCACGGTATCCTCTGCCGAAACAGAGGTTGGACAAGACCGGAGGGGTCTCCTAGTTCCAAAGGAGAT  
+  
FFFFFFFFFFFFFFFFFFFFFFFFFFFFFFFFFFFFFFFFFFFFFFFFFFFFFFFFFFFFFFFFFFFFFFFFFFFFFFFF  
F:FFFFFFFFFFFFFFFF:FFFFFFFFFFFFFFFFFFFFFFFFFFFFFFFFFFFFFFFFFFFFFFFFFFFFFFFF  
@A00155:342:HHGFNDSXY:1:2277:1678:33395 1:N:0:GAACCTAG+TCCGCATA  
ACTTCTCTCGGGCCCACAGCCTTACAGCTGTGGAGCACGGTATCCTCTGCCGAAACAGAGGTTGGACA  
AGACCGGAGGGGTCTCCTAGTTCCAAAGGAGATGTACTCCGGGCTTGTTACGACCTACCGTGTAAGT  
+  
FFFFFFFFFFFFFFFFFFFFFFFF,FFFFFFFF:FFFFFFFF::FFFFFFFFFFFF,FFFFFFFF:FFFF:  
F:FFFFFFFFFFFFFFFF:FFFF:FFFFFFFFFFFFFFFF:FFFFFFFFFFFF, :FFFFFFFF,FF  
@A00155:342:HHGFNDSXY:1:2278:23448:12602 1:N:0:GAACCTAG+TCCGCATA  
GTCATCTCAATGCCGAGAGGGATGTGGAGGGCGAGAGAGAGCGACTTCTCTCGGGCCCACAGCCTTAC  
AGCTGTGGAGCACGGTATCCTCTGCCGAAACAGAGGTTGGACAAGACCGGAGGGGTCTCCTAGTTCCA  
+  
FFFFFFFFFFFFFFFFFFFF:FFFF:FFFFFFFFFFFFFFFFFFFFFFFFFFFFFFFFFFFFFFFFFFFFFFFF:F:F  
FFFFFFFFFFFFFFFFFFFFFFFFFFFFFFFFFFFFFFFFFFFFFFFFFFFFFFFFFFFFFFFFFFFFFFFFFFFF  
@A00155:342:HHGFNDSXY:1:2278:23393:12665 1:N:0:GAACCTAG+TCCGCATA  
GTCATCTCAATGCCGAGAGGGATGTGGAGGGCGAGAGAGAGCGACTTCTCTCGGGCCCACAGCCTTAC  
AGCTGTGGAGCACGGTATCCTCTGCCGAAACAGAGGTTGGACAAGACCGGAGGGGTCTCCTAGTTCCA  
+  
FFFFFFFFFFFFFFFFFFFF:FFFFFFFFFFFFFFFFFFFF:FFFFFFFFFFFF:FFFFFFFFFFFFFFFFFFFF  
FFFFFFFFFFFFFFFFFFFFFFFFFFFFFFFFFFFFFFFFFFFFFFFFFFFFFFFFFFFFFFFFFFFFFFFFFFFF  
@A00155:342:HHGFNDSXY:1:2278:15673:17613 1:N:0:GAACCTAG+TCCGCATA  
CTTCTCTCGGGCCCACAGCCTTACAGCTGTGGAGCACGGTATCCTCTGCCGAAACAGAGGTTGGACAA  
GACCGGAGGGGTCTCCTAGTTCCAAAGGAGATGTACTCCGGGCTTGTTTACGACCTACCGTGTAAGTC  
+  
FFFFFFFFFFFFFFFFFFFFFFFFFFFFFFFFFFFFFFFFFFFFFFFFFFFFFFFFFFFFFFFFFFFFFFFFFFFF  
FFFFFFFFFFFFFFFFFFFFFFFFFFFFFFFFFFFFFFFFFFFFFFFFFFFFFFFFFFFFFFFFFFFFFFFFFFFF  
@A00155:342:HHGFNDSXY:1:2278:20500:22404 1:N:0:GAACCTAG+TCCGCATA  
TGTGGAGGGCGAGAGAGAGCGACTTCTCTCGGGCCCACAGCCTTACAGCTGTGGAGCACGGTATCCTC  
TGCCGAAACAGAGGTTGGACAAGACCGGAGGGGTCTCCTAGTTCCAAAGGAGATGTACTCCGGG  
+  
FFFF:FFFFFFFFFFFFFFFFFFFFFFFFFFFFFFFFFFFFFFFFFFFFFFFFFFFFFFFFFFFFFFFFFFFF:FFFFFFFF  
FFFFFFFFFFFFFFFFFFFFFFFFFFFFFFFFFFFFFFFFFFFFFFFFFFFFFFFFFFFFFFFFFFFFFFFFFFFF  
@A00155:342:HHGFNDSXY:1:2301:28085:1689 1:N:0:GAACCTAG+TCCGCATA  
TGTTTCGGCAGAGGATACCGTGCTCCACAGCTGTAAGGCTGTGGGCCCGAGAGAAGTCGCTCTCTC  
GCCCTCTACATCCCTCTCGGCATTGAGATGACCATAGGCCAGAGGTGAGTCCTTAAGTGGACACAGCT  
+  
FFFFFFFFFFFF:FFFFFFFF:FFFF:FFFFF:FFFFF,FFFF:FFF:FFFFFFFFF:F:FFFFF  
,FFFFFFFFFFFF,FFFF:FFF:FFFFFFFFFFFF,F:FFFFF:FFFFFFFFFFFFFFFF:FFFFFFFF:F  
@A00155:342:HHGFNDSXY:1:2301:26910:15749 1:N:0:GAACCTAG+TCCGCATA  
CTTCTCTCGGGCCCACAGCCTTACAGCTGTGGAGCACGGTATCCTCTGCCGAAACAGAGGTTGGACAA  
GACCGGAGGGGTCTCCTGGTTCCAAAGGAGATGTACTCCGGGCTTGTTACGACCTACCGTGTAAGTC  
+

FFFFFFFFFFFFFFFFFFFFFFFFFFFFFFFFFFFFFFFFFFFFFFFFFFFFFFFFFFFFFFFFFFFFFFFF  
FFFFFFFFFFFFFFFFFFFFFFFFFFFFFFFFFFFFFFFFFFFFFFFFFFFFFFFFFFFFFFFFFFFFFFFF  
@A00155:342:HHGFNDSXY:1:2301:20374:25285 1:N:0:GAACCTAG+TCCGCATA  
TCTCTCGCCCTCCACATCCCTCTCGGCATTGAGATGACCATAGGCCAGAGGTGAGTCCTTAAGTGGAC  
ACAGCTGATCTAAGGCGGTGTGGTGGGGCATGGGTTTGAACCCCATGACGGTCGGAGTC  
+  
FFFFFFFFFFFFFF:FFFF,FF:FFFFFFFFFF:FFFFFFFFF::,FFFF::,FFFF,FFFFFFFF,  
:FF:FFFF:FFFF,FF:FFFFFFFF, :FFF:,F:,FFFFFFFFF::FFFFFFFFFFFFFFFF  
@A00155:342:HHGFNDSXY:1:2302:31159:29121 1:N:0:GAACCTAG+TCCGCATA  
AGAGAGAGCGACTTCTCTCGGGCCACAGCCTTACAGCTGTGGAGCACGGTATCCTCTGCCGAAACAG  
AGGTTGGACAAGACCGGAGGGGTCTCCTAGTTCCAAAGGAGATGTACTCCGGGCTTGTTACG  
+  
FFFFFFFFFFFFFFFFFFFFFFFFFFFFFFFFFFFFFFFFFFFFFFFFFFFFFFFFFFFFFFFFFFFFFFFF  
FFFFFFFFFFFF:FFFFFFFF:FFFFFFFFFFFFFFFFFFFFFFFFFFFFFFFFFFFFFFFFFFFFFFFF  
@A00155:342:HHGFNDSXY:1:2303:23719:1235 1:N:0:GAACCTAG+TCCGCATA  
AAGGCTGTGGGCCCCGAGAGAAGTCGCTCTCTCTCGCCCTCCACATCCCTCTCGGCATTGAGATGACCA  
TAGGCCAGAGGTGAGTCCTTAAGTGGACACAGCTGATCTAAGGCGGTGTGGCGGGGCATGGGTTTGAA  
+  
FFFFFFFFFFFFFFFFFFFFFFFFFFFFFFFFFFFFFFFFFFFFFFFFFFFFFFFFFFFFFFFFFFFFFFFF  
FFFFFFFFFFFFFFFFFFFFFFFFFFFFFFFFFFFFFFFFFFFFFFFFFFFFFFFFFFFFFFFFFFFFFFFF:FFF  
@A00155:342:HHGFNDSXY:1:2303:23502:1423 1:N:0:GAACCTAG+TCCGCATA  
AAGGCTGTGGGCCCCGAGAGAAGTCGCTCTCTCTCGCCCTCCACATCCCTCTCGGCATTGAGATGACCA  
TAGGCCAGAGGTGAGTCCTTAAGTGGACACAGCTGATCTAAGGCGGTGTGGCGGGGCATGGGTTTGAA  
+  
FFFFFFFFFFFFFFFFFFFFFFFFFFFFFFFFFFFFFFFFFFFFFFFFFFFFFFFFFFFFFFFFFFFFFFFF  
FFFFFFFFFFFFFFFFFFFFFFFFFFFFFFFFFFFFFFFFFFFFFFFFFFFFFFFFFFFFFFFFFFFFFFFF  
@A00155:342:HHGFNDSXY:1:2303:18448:6010 1:N:0:GAACCTAG+TCCGCATA  
GAGCGACTTCTCTCGGGCCACAGCCTTACAGCTGTGGAGCACGGTATCCTCTGCCGAAACAGAGGTT  
GGACAAGACCGGAGGGGTCTCCTAGTTCCAAAGGAGATGTACTCCGGGCTTGTTACGACCTACCGTG  
+  
FFFFFFFFFFFFFFFFFFFFFFFFFFFFFFFFFFFFFFFFFFFFFFFFFFFFFFFFFFFFFFFFFFFFFFFF  
FFFFFFFFFFFFFFFFFFFFFFFFFFFFFFFFFFFFFFFFFFFFFFFFFFFFFFFFFFFFFFFFFFFFFFFF:FFF  
FFFFFFFFFFFFFFFFFFFFFFFFFFFFFFFFFFFFFFFFFFFFFFFFFFFFFFFFFFFFFFFFFFFFFFFF:FFF  
@A00155:342:HHGFNDSXY:1:2303:13602:10488 1:N:0:GAACCTAG+TCCGCATA  
CCCTCCACATCCCTCTCGGCATTGAGATGACCATAGGCCAGAGGTGAGTCCTTAAGTGGACACAGCTG  
ATCTAAGGCGGTGTGGCGGGGCATGGGTTTGAACCCCATGACGGTCGGAGTCTAGTAGGCTCCCTGA  
+  
FFFFFFFFFFFFFFFFFFFFFFFFFFFFFFFFFFFFFFFFFFFFFFFFFFFFFFFFFFFFFFFFFFFFFFFF  
FFFFFFFFFFFFFFFFFFFFFFFFFFFFFFFFFFFFFFFFFFFFFFFFFFFFFFFFFFFFFFFFFFFFFFFF  
@A00155:342:HHGFNDSXY:1:2303:28601:26976 1:N:0:GAACCTAG+TCCGCATA  
GAGAGAGCGACTTCTCTCGGGCCACAGCCTTACAGCTGTGGAGCACGGTATCCTCTGCCGAAACAGA  
GGTTGGACAAGACCGGAGGGGTCTCCTGGTTCCAAAGGAGATGTACTCCGGGCTTGTTACGACCTAC  
+  
FFFFFFFFFFFFFFFFFFFFFFFFFFFFFFFFFFFFFFFFFFFFFFFFFFFFFFFFFFFFFFFFFFFFFFFF  
FFFFFFFFFFFFFFFFFFFFFFFFFFFFFFFFFFFFFFFFFFFFFFFFFFFFFFFFFFFFFFFFFFFFFFFF  
@A00155:342:HHGFNDSXY:1:2303:9570:33692 1:N:0:GAACCTAG+TCCGCATA  
TGTCCACTTAAGGACTCACCTCTGGCCTATGGTCATCTCAATGCCGAGAGGGATGTGAAGGGCGAGAG  
AGAGCGACTTCTCTCGGGCCACAGCCTTACAGCTGTGGAGCACGGTATCCTCTGCCGAAACAGAGGT  
+  
FFFFFFFFFFFFFFFFFFFFFFFFFFFFFFFFFFFFFFFFFFFFFFFFFFFFFFFFFFFFFFFFFFFFFFFF  
FFFFFFFFFFFFFFFFFFFFFFFFFFFFFFFFFFFFFFFFFFFFFFFFFFFFFFFFFFFFFFFFFFFFFFFF:FFFF  
@A00155:342:HHGFNDSXY:1:2304:14172:5431 1:N:0:GAACCTAG+TCCGCATA  
TCGGCAGAGGATACCGTGCTCCACAGCTGTAAGGCTGTGGGCCCGAGAGAAGTCGCTCTCTCTCGCCC  
TTCACATCCCTCTCGGCATTGAGATGACCATAGGCCAGAGGTGAGTCCTTAAGTGGACACA  
+

FFFFFFFFFFFFFFFFFFFFFFFFFFFFFFFFFFFFFFFFFFFFFFFFFFFFFFFFFFFFFFFFFFFFFFFF  
FFFFFFFFFFFFFFFFFFFFFFFFFFFFFFFFFFFFFFFFFFFFFFFFFFFFFFFFFFFFFFFFFFFFFFFF  
@A00155:342:HHGFNDSXY:1:2304:14136:6433 1:N:0:GAACCTAG+TCCGCATA  
TCGGCAGAGGATACCGTGCTCCACAGCTGTAAGGCTGTGGGCCCGAGAGAAGTCGCTCTCTCGCCC  
TTCACATCCCTCTCGGCATTGAGATGACCATAGGCCAGAGGTGAGTCCTTAAGTGGACACA  
+  
FFFFFFFFFFFFFFFFFFFFFFFFFFFFFFFFFFFFFFFFFFFFFFFFFFFFFFFFFFFFFFFFFFFFFFFF  
FFFFFFFFFFFFFFFFFFFFFFFFFFFFFFFFFFFFFFFFFFFFFFFFFFFFFFFFFFFFFFFFFFFFFFFF  
@A00155:342:HHGFNDSXY:1:2304:21332:11193 1:N:0:GAACCTAG+TCCGCATA  
GAGCGACTTCTCTCGGGCCCACAGCCTTACAGCTGTGGAGCACGGTATCCTCTGCCGAAACAGAGGTT  
GGACAAGACCGGAGGGGTCTCCTAGTTCCAAAGGAGATGTACTCCGGGCTTGTTACGACCTACCGTG  
+  
FFFFFFFFFFFFFFFFFFFFFFFFFFFFFFFFFFFFFFFFFFFFFFFFFFFFFFFFFFFFFFFFFFFFFFFF  
FFFFFFFFFFFFFFFFFFFFFFFFFFFFFFFFFFFFFFFFFFFFFFFFFFFFFFFFFFFFFFFFFFFFFFFF  
@A00155:342:HHGFNDSXY:1:2304:16848:28917 1:N:0:GAACCTAG+TCCGCATA  
CGGCAGAGGATACCGTGCTCCACAGCTGTAAGGCTGTGGGCCCGAGAGAAGTCGCTCTCTCGCCCT  
CTACATCCCTCTCGGCATTGAGATGACCATAGGCCAGAGGTGAGTCCTTAAGTGGACACAGCTGATCT  
+  
FFFFFFFFFFFFFFFFFFFFFFFFFFFFFFFFFFFFFFFFFFFFFFFFFFFFFFFFFFFFFFFFFFFFFFFF  
FFFFFFFFFFFFFFFFFFFFFFFFFFFFFFFFFFFFFFFFFFFFFFFFFFFFFFFFFFFFFFFFFFFFFFFF  
@A00155:342:HHGFNDSXY:1:2305:11686:2127 1:N:0:GAACCTAG+TCCGCATA  
AGAGAGAGCGACTTCTCTCGGGCCCACAGCCTTACAGCTGTGGAGCACGGTATCCTCTGCCGAAACAG  
AGGTTGGACAAGACCGGAGGGGTCTCCTAGTTCCAAAGGAGATGTACTCCGGGCTTGTTACGACCTA  
+  
FFFFFFFFFFFFFFFFFFFFFFFFFFFFFFFFFFFFFFFFFFFFFFFFFFFFFFFFFFFFFFFFFFFFFFFF  
FFFFFFFFFFFFFFFFFFFFFFFFFFFFFFFFFFFFFFFFFFFFFFFFFFFFFFFFFFFFFFFFFFFFFFFF  
@A00155:342:HHGFNDSXY:1:2305:19895:24486 1:N:0:GAACCTAG+TCCGCATA  
TAGTCTAGTAGGCTACCTGACGAGTCCTTTTTAGGACGAACTTACACAACCTCGAAGAGTAACGACGG  
TTTCGTTCTTGGAACGGACTIONCATCAGGGAGCCTACTAGACTCCGACCGTCATGGGGGTTCAAACCCAT  
+  
FFFFFFFFFFFFFFFFFFFFFFFFFFFFFFFFFFFFFFFFFFFFFFFFFFFFFFFFFFFFFFFFFFFFFFFF  
FFFFFFFFFFFFFFFFFFFFFFFFFFFFFFFFFFFFFFFFFFFFFFFFFFFFFFFFFFFFFFFFFFFFFFFF:  
@A00155:342:HHGFNDSXY:1:2305:4951:31735 1:N:0:GAACCTAG+TCCGCATA  
CCTCTGGCCTATGGTCATCTCAATGCCGAGAGGGATGTGAAGGGCGAGAGAGAGCGACTTCTCTCGGG  
CCCACAGCCTTACAGCTGTGGAGCACGGTATCCTCTGCCGAAACAGAGGTTGGACAAGAC  
+  
FFFFFFFFFFFF,FFFFFFFFFFFFFFFFFFFFFFFFFFFFFFFFFFFFFFFFFFFFFFFFFFFFFFFFFFFF  
FFFFFFFFFFFF:FFFFFFFFFFFFFFFFFFFFFFFFFFFFFFFFFFFFFFFFFFFFFFFFFFFFFFFFFFFF  
@A00155:342:HHGFNDSXY:1:2306:32217:2300 1:N:0:GAACCTAG+TCCGCATA  
TTCTCTCGGGCCCACAGCCTTACAGCTGTGGAGCACGGTATCCTCTGCCGAAACAGAGGTTGGACAAG  
ACCGGAGGGGTCTCCTGGTTCCAAAGGAGATGTACTCCGGGCTTGTTACGACCTACCGTGTAAGTCG  
+  
FFFFFFFFFFFFFFFFFFFFFFFFFFFFFFFFFFFFFFFFFFFFFFFFFFFFFFFFFFFFFFFFFFFFFFFF  
FFFFFFFFFFFFFFFFFFFFFFFFFFFFFFFFFFFFFFFFFFFFFFFFFFFFFFFFFFFFFFFFFFFFFFFF  
@A00155:342:HHGFNDSXY:1:2306:25590:13213 1:N:0:GAACCTAG+TCCGCATA  
CAATGCCGAGAGGGATGTGGAGGGCGAGAGAGAGCGACTTCTCTCGGGCCCACAGCCTTACAGCTGTG  
GAGCACGGTATCCTCTGCCGAAACAGAGGTTGGACAAGACCGGAGGGGTCTCCTAGTTCCAAAGGAGA  
+  
FFFFFFFFFFFFFFFFFFFFFFFFFFFFFFFFFFFFFFFFFFFFFFFFFFFFFFFFFFFFFFFFFFFFFFFF  
FFFFFFFFFFFFFFFFFFFFFFFFFFFFFFFFFFFFFFFFFFFFFFFFFFFFFFFFFFFFFFFFFFFFFFFF:  
@A00155:342:HHGFNDSXY:1:2306:11324:29559 1:N:0:GAACCTAG+TCCGCATA  
AGAGAGAGCGACTTCTCTCGGGCCCACAGCCTTACAGCTGTGGAGCACGGTATCCTCTGCCGAAACAG  
AGGTTGGACAAGACCGGAGGGGTCTCCTAGTTCCAAAGGAGATGTACTCCGGGCTTGTTACGACCTA  
+

FFFFFFFFFFFFFFFFFFFFFFFF:FFF:FFFFFFFFFFFFFFFFFFFFFFFFFFFFFFFFFFFFFFFF  
:FFFFFFFFFFFFFFFFFFFFFFFFFFFFFFFFFFFFFFFFFFFFFFFFFFFFFFFFFFFFFFFF:FFFFFFF  
@A00155:342:HHGFNDSXY:1:2306:24297:32769 1:N:0:GAACCTAG+TCCGCATA  
GATGTAGAGGGCGAGAGAGAGCGACTTCTCTCGGGCCACAGCCTTACAGCTGTGGAGCACGGTATCC  
TCTGCCGAAACAGAGGTTGGACAAGACCGGAGGGGTCTCCTAGTTCCAAAGGAGATGTACTCCGGGCT  
+  
FFFFFFFFFFFFFFFFFFFFFFFFFFFFFFFFFFFFFFFFFFFFFFFFFFFFFFFFFFFFFFFFFFFF  
FFFFFFFFFFFFFFFFFFFFFFFFFFFFFFFFFFFFFFFFFFFFFFFFFFFFFFFFFFFFFFFFFFFF:FFFFFFFFFFFFFFFFFFFFFFFFFFFFFFFF  
@A00155:342:HHGFNDSXY:1:2306:30129:33849 1:N:0:GAACCTAG+TCCGCATA  
GGATGTAGAGGGCGAGAGAGAGCGACTTCTCTCGGGCCACAGCCTTACAGCTGTGGAGCACGGTATC  
CTCTGCCGAAACAGAGGTTGGACAAGACCGGAGGGGTCTCCTAGTTCCAAAGGAGATGTACTCC  
+  
FFFFFFFFFFFFFFFFFFFFFFFFFFFFFFFFFFFFFFFFFFFFFFFFFFFFFFFFFFFFFFFFFFFF  
FFFFFFFFFFFFFFFFFFFFFFFFFFFFFFFFFFFFFFFFFFFFFFFFFFFFFFFFFFFFFFFFFFFF  
@A00155:342:HHGFNDSXY:1:2307:12337:1125 1:N:0:GAACCTAG+TCCGCATA  
TCTCTCGGGCCACAGCCTTACAGCTGTGGAGCACGGTATCCTCTGCCGAAACAGAGGTTGGACAAGA  
CCGGAGGGGTCTCCTAGTTCCAAAGGAGATGTACTCCGGGCTTGTTACAGACCTACCGTGTAAGTCGT  
+  
FFFFFFFFFFFFFFFFFFFFFFFFFFFFFFFFFFFFFFFFFFFFFFFFFFFFFFFFFFFFFFFFFFFF  
FFFFFFFFFFFFFFFFFFFFFFFFFFFFFFFFFFFFFFFFFFFFFFFFFFFFFFFFFFFFFFFFFFFF:FFFFFFFFFFFFFFFFFFFFFFFFFFFFFFFF  
@A00155:342:HHGFNDSXY:1:2307:16667:5619 1:N:0:GAACCTAG+TCCGCATA  
GGATGTGGAGGGCGAGAGAGAGCGACTTCTCTCGGGCCACAGCCTTACAGCTGTGGAGCACGGTATC  
CTCTGCCGAAACAGAGGTTGGACAAGACCGGAGGGGTCTCCTAGTTCCAAAGGAGATGTACTCC  
+  
FFFFF:FFFFFFFFFFFFFFFFFFFFFFFFFFFFFFFFFFFFFFFFFFFFFFFFFFFFFFFFFFFF:FFFFFFFFFFFFFFFFFFFF  
FFFFFFFFFFFFFFFFFFFFFFFFFFFFFFFFFFFFFFFFFFFFFFFFFFFFFFFFFFFFFFFFFFFF,FFFFFFFFFFFFFFFF,FFFFFFF  
@A00155:342:HHGFNDSXY:1:2308:9308:6214 1:N:0:GAACCTAG+TCCGCATA  
GGATGTGGAGGGCGAGAGAGAGCGACTTCTCTCGGGCCACAGCCTTACAGCTGTGGAGCACGGTATC  
CTCTGCCGAAACAGAGGTTGGACAAGACCGGAGGGGTCTCCTAGTTCCAAAGGAGATGTACTCC  
+  
FFFFFFFFFFFFFFFFFFFFFFFFFFFFFFFFFFFFFFFFFFFFFFFFFFFFFFFFFFFFFFFFFFFF  
FFFFFFFFFFFFFFFFFFFFFFFFFFFFFFFFFFFFFFFFFFFFFFFFFFFFFFFFFFFFFFFFFFFF  
@A00155:342:HHGFNDSXY:1:2308:3839:7795 1:N:0:GAACCTAG+TCCGCATA  
ATCTCAATGCCGAGAGGGATGTGGAGGGCGAGAGAGAGCGACTTCTCTCGGGCCACAGCCTTACAGC  
TGTGGAGCACGGTATCCTCTGCCGAAACAGAGGTTGGACAAGACCGGAGGGGTCTCCTAGTTCCAAAG  
+  
FFFFFFFFFF,FFF:FFFFF:FF,FFFFFF,FFFFF:FFFFFFFFFFFF,FF,FFFFFFFFFFFFFFFF:F:F,  
FFFFFFFFFFFFFFFFFFFFFFFFFFFFFFFFFFFFFFFFFFFFFFFFFFFFFFFFFFFFFFFFFFFF  
@A00155:342:HHGFNDSXY:1:2308:10511:30373 1:N:0:GAACCTAG+TCCGCATA  
CTTCTCTCGGGCCACAGCCTTACAGCTGTGGAGCACGGTATCCTCTGCCGAAACAGAGGTTGGACAA  
GACCGGAGGGGTCTCCTGGTTCCAAAGGAGATGTACTCCGGGCTTGTTACAGACCTACCGTGTAAGTC  
+  
FFFFFFFFFFFFFFFFFFFFFFFFFFFFFFFFFFFFFFFFFFFFFFFFFFFFFFFFFFFFFFFFFFFF  
FFFFFFFFFFFFFFFFFFFFFFFFFFFFFFFFFFFFFFFFFFFFFFFFFFFFFFFFFFFFFFFFFFFF:FFFFFFFFFFFFFFFFFFFFFFFFFFFFFFFF  
@A00155:342:HHGFNDSXY:1:2308:10926:30843 1:N:0:GAACCTAG+TCCGCATA  
CTTCTCTCGGGCCACAGCCTTACAGCTGTGGAGCACGGTATCCTCTGCCGAAACAGAGGTTGGACAA  
GACCGGAGGGGTCTCCTGGTTCCAAAGGAGATGTACTCCGGGCTTGTTACAGACCTACCGTGTAAGTC  
+  
FFFFFFFFFFFFFFFFFFFFFFFFFFFFFFFFFFFFFFFFFFFFFFFFFFFFFFFFFFFFFFFFFFFF:FFFFFFFFFFFFFFFF  
FFFFFFFFFFFFFFFFFFFFFFFFFFFFFFFFFFFFFFFFFFFFFFFFFFFFFFFFFFFFFFFFFFFF:FFFFFFFFFFFFFFFFFFFFFFFFFFFFFFFF  
@A00155:342:HHGFNDSXY:1:2308:17065:34428 1:N:0:GAACCTAG+TCCGCATA  
CCACAGCCTTACAGCTGTGGAGCACGGTATCCTCTGCCGAAACAGAGGTTGGACAAGACCGGAGGGGT  
CTCCTAGTTCCAAAGGAGATGTACTCCGGGCTTGTTACAGACCTACCGTGTAAGTCGTAGTCTAGTAG  
+



FFFFFFFFFFFFFFFFFFFFFFFFFFFFFFFFFFFFFFFFFFFFFFFFFFFFFFFFFFFFFFFFFFFFFFFF  
FFFFFFFFFFFFFFFFFFFFFFFFFFFFFFFFFFFFFFFFFFFFFFFFFFFFFFFFFFFFFFFFFFFFFFFF:FFFFFFFFFFFFFFFFFFFFFFFFFFFFFFFFFFFFFFFFFFFFFFFF:FF  
@A00155:342:HHGFNDSXY:1:2308:30201:35258 1:N:0:GAACCTAG+TCCGCATA  
GGATGTGGAGGGCGAGAGAGAGCGACTTCTCTCGGGCCACAGCCTTACAGCTGTGGAGCACGGTATC  
CTCTGCCGAAACAGAGGTTGGACAAGACCGGAGGGGTCTCCTAGTTCCAAAGGAGATG  
+  
FFFFFFFFFFFFFFFFFFFFFFFFFFFFFFFFFFFFFFFFFFFFFFFFFFFFFFFFFFFFFFFFFFFFFFFF  
FFFFFFFFFFFFFFFFFFFFFFFFFFFFFFFFFFFFFFFFFFFFFFFFFFFFFFFFFFFFFFFFFFFFFFFF:FFFFFFFFFFFFFFFFFFFFFFFFFFFFFFFFFFFFFFFF  
@A00155:342:HHGFNDSXY:1:2309:3115:4319 1:N:0:GAACCTAG+TCCGCATA  
CGACTTCTCTCGGGCCACAGCCTTACAGCTGTGGAGCACGGTATCCTCTGCCGAAACAGAGGTTGGA  
CAAGACCGGAGGGGTCTCCTAGTTCCAAAGGAGATGTACTCCGGGCTTGTTACAGACCTACCGTGTA  
+  
FFFFFFFFFFFFFFFFFFFFFFFFFFFFFFFFFFFFFFFFFFFFFFFFFFFFFFFFFFFFFFFFFFFFFFFF:FF  
FFFFFFFFFFFFFFFF:FFFFFFFFFFFFFFFF:FFFFFFFF:FFFFFFFFFFFFFFFFFFFFF,,FF  
@A00155:342:HHGFNDSXY:1:2309:11388:4617 1:N:0:GAACCTAG+TCCGCATA  
GAGCGACTTCTCTCGGGCCACAGCCTTACAGCTGTGGAGCACGGTATCCTCTGCCGAAACAGAGGTT  
GGACAAGACCGGAGGGGTCTCCTGGTTCCAAAGGAGATGTACTCCGGGCTTGTTACAGACCTACCGTG  
+  
FF:F:FFF,FFFFFFFF:FFF:FFFFFFFF,FFFFFFFF:FFFFF::FFF:FFFF:FF:FF  
FFFFFFFF:FFFF:FFFFFFFF:FFFFFFFFFFFFFFFF,FFFF:,FF:F:FFF,FFF,,FFFF  
@A00155:342:HHGFNDSXY:1:2309:11216:8891 1:N:0:GAACCTAG+TCCGCATA  
GGATGTAGAGGGCGAGAGAGAGCGACTTCTCTCGGGCCACAGCCTTACAGCTGTGGAGCACGGTATC  
CTCTGCCGAAACAGAGGTTGGACAAGACCGGAGGGGTCTCCTAGTTCCAAAGGAGATGTACTCC  
+  
FFFFFFFFFFFFFFFFFFFFFFFFFFFFFFFFFFFFFFFFFFFFFFFFFFFFFFFFFFFFFFFFFFFFFFFF  
FFFFFFFFFFFFFFFFFFFFFFFFFFFFFFFFFFFFFFFFFFFFFFFFFFFFFFFFFFFFFFFFFFFFFFFF  
@A00155:342:HHGFNDSXY:1:2309:11243:24533 1:N:0:GAACCTAG+TCCGCATA  
TGTTTCGGCAGAGGATACCGTGCTCCACAGCTGTAAGGCTGTGGGCCCGAGAGAAGTCGCTCTCTC  
GCCCTCCACATCCCTCTCGGCATTGAGATGACCATAGGCCAGAGGTGAGTCCTTAAGTGGACACAGCT  
+  
FFFFFFFFFFFFFFFFFFFFFFFFFFFFFFFFFFFFFFFFFFFFFFFFFFFFFFFFFFFFFFFFFFFFFFFF  
FFFFFFFFFFFFFFFFFFFFFFFFFFFFFFFFFFFFFFFFFFFFFFFFFFFFFFFFFFFFFFFFFFFFFFFF:FFF  
@A00155:342:HHGFNDSXY:1:2309:10827:33708 1:N:0:GAACCTAG+TCCGCATA  
TGTGGAGGGCGAGAGAGAGCGACTTCTCTCGGGCCACAGCCTTACAGCTGTGGAGCACGGTATCCTC  
TGCCGAAACAGAGGTTGGACAAGACCGGAGGGGTCTCCTAGTTCCAAAGGAGATGTACTCCGGG  
+  
FFFFFFFFFFFFFFFFFFFFFFFFFFFFFFFFFFFFFFFFFFFFFFFFFFFFFFFFFFFFFFFFFFFFFFFF:FFFF  
FFFFFFFFFFFFFFFFFFFFFFFFFFFFFFFFFFFFFFFFFFFFFFFFFFFFFFFFFFFFFFFFFFFFFFFF  
@A00155:342:HHGFNDSXY:1:2310:29478:3630 1:N:0:GAACCTAG+TCCGCATA  
CTCTGCCGAAACAGAGGTTGGACAAGACCGGAGGGGTCTCCTAGTTCCAAAGGAGATGTACTCCGGGC  
TTGTTACAGACCTACCGTGTAAGTCGTAGTCTAGTAGGCTACCTGACGAGTCCTTTTAGGACGAAAC  
+  
FFFFFFFFFFFFFFFFFFFFFFFFFFFFFFFFFFFFFFFFFFFFFFFFFFFFFFFFFFFFFFFFFFFFFFFF  
FFFFFFFFFFFFFFFFFFFFFFFFFFFFFFFFFFFFFFFFFFFFFFFFFFFFFFFFFFFFFFFFFFFFFFFF  
@A00155:342:HHGFNDSXY:1:2310:20039:15092 1:N:0:GAACCTAG+TCCGCATA  
AGATCAGCTGTGTCCACTTAAGGACTCACCTCTGGCCTATGGTCTTCTCAATGCCGAGAGGGATGTGG  
AGGGCGAGAGAGAGCGACTTCTCTCGGGCCACAGCCTTACAGCTGTGGAGCACGGTATCCTCTGCCG  
+  
FFFFFFFFFFFFFFFFFFFFFFFFFFFFFFFFFFFFFFFFFFFFFFFFFFFFFFFFFFFFFFFFFFFFFFFF,FFF  
FFFFFFFFFFFFFFFFFFFFFFFFFFFFFFFFFFFFFFFFFFFFFFFFFFFFFFFFFFFFFFFFFFFFFFFF  
@A00155:342:HHGFNDSXY:1:2310:21630:27305 1:N:0:GAACCTAG+TCCGCATA  
GTGTGGTGGGGCATGGGTTTGAACCCCATGACGGTCGGAGTCTAGTAGGCTCCCTGATGAGTCCGTT  
CCAAGGACGAAACCGTCGTTACTCTTCGAGTTGTGTAAGTTTCGTCCTAAAAAGGACTCGTCAGGTAG  
+

[illegible]

FF:FFFFFFFFFFFFFFFFFFFFFFFFFFFFFFFFFFFFFFFFFFFFFFFFFFFFFFFFFFFFFFFF,FFFFFFFF  
FFFFFFFFFFFFFFFF:FFFFFFFFFFFFFFFFFFFFFFFFFFFFFFFFFFFFFFFFFFFFFFFFFFFFFFFFFFFFFFFF  
@A00155:342:HHGFNDSXY:1:2314:17788:19460 1:N:0:GAACCTAG+TCCGCATA  
GTCATCTCAATGCCGAGAGGGATGTGGAGGGCGAGAGAGAGCGACTTCTCTCGGGCCCACAGCCTTAC  
AGCTGTGGAGCACGGTATCCTCTGCCGAAACAGAGGTTGGACAAGACCGGAGGGGTCTCCTAGCTCCA  
+  
FFFFFFFFFFFFFFFFFFFFFFFFFFFFFFFFFFFFFFFFFFFFFFFFFFFFFFFFFFFFFFFFFFFFFFFF  
FFF:FFFFFFFFFFFFFFFFFFFFFFFFFFFFFFFFFFFFFFFFFFFFFFFFFFFFFFFFFFFFFFFF  
@A00155:342:HHGFNDSXY:1:2314:6117:30217 1:N:0:GAACCTAG+TCCGCATA  
TGTAGAGGGCGAGAGAGAGCGACTTCTCTCGGGCCCACAGCCTTACAGCTGTGGAGCACGGTATCCTC  
TGCCGAAACAGAGGTTGGACAAGACCGGAGGGGTCTCCTAGTTCCAAAGGAGATGTACTCCGGG  
+  
FFFFFFFFF:FFFFFFFFFFFFFFFFFFFFFFFFFFFFFFFFFFFFFFFFFFFFFFFFFFFFFFFFFFFFFFFF:FFFFFFFFF:FFFFF  
FFFFFFFFFFFFFFFFFFFFFFFFFFFFFFFFFFFFFFFFFFFFFFFFFFFFFFFFFFFFFFFFFFFFFFFF  
@A00155:342:HHGFNDSXY:1:2314:15772:32315 1:N:0:GAACCTAG+TCCGCATA  
CTCAATGCCGAGAGGGATGTGGAGGGCGAGAGAGAGCGACTTCTCTCGGGCCCACAGCCTTACAGCTG  
TGGAGCACGGTATCCTCTGCCGAAACAGAGGTTGGACAAGACCGGAGGGGTCTCCTAGTTCCAAAGGA  
+  
FFFFFFFFFFFFFFFFFFFFFFFFFFFFFFFFFFFFFFFFFFFFFFFFFFFFFFFFFFFFFFFFFFFFFFFF,FFFFFFF  
FFFFFFFFFFFFFFFFFFFFFFFFFFFFFFFFFFFFFFFFFFFFFFFFFFFFFFFFFFFFFFFFFFFFFFFF  
@A00155:342:HHGFNDSXY:1:2315:15926:14418 1:N:0:GAACCTAG+TCCGCATA  
TATCCTCTGCCGAAACAGAGGTTGGACAAGACCGGAGGGGTCTCCTGGTTCCAAAGGAGATGTACTCC  
GGGCTTGTTACGACCTACCGTGTAAGTCGTAGTCTAGTAGGCTACCTGACGAGTCCTTTTAGGACG  
+  
FFFFFFFFFFFFFFFFFFFFFFFFFFFFFFFFFFFFFFFFFFFFFFFFFFFFFFFFFFFFFFFFFFFFFFFF  
FFFFFFFFFFFFFFFFFFFFFFFFFFFFFFFFFFFFFFFFFFFFFFFFFFFFFFFFFFFFFFFFFFFFFFFF  
@A00155:342:HHGFNDSXY:1:2315:28999:21465 1:N:0:GAACCTAG+TCCGCATA  
TGTGGAGGGCGAGAGAGAGCGACTTCTCTCGGGCCCACAGCCTTACAGCTGTGGAGCACGGTATCCTC  
TGCCGAAACAGAGGTTGGACAAGACCGGAGGGGTCTCCTAGTTCCAAAGGAGATGTACTCCGGG  
+  
FFFFFFFFFFFFFFFFFFFFFFFFFFFFFFFFFFFFFFFFFFFFFFFFFFFFFFFFFFFFFFFFFFFFFFFF  
FFFFFFFFFFFFFFFFFFFFFFFFFFFFFFFFFFFFFFFFFFFFFFFFFFFFFFFFFFFFFFFFFFFFFFFF  
@A00155:342:HHGFNDSXY:1:2315:16685:28761 1:N:0:GAACCTAG+TCCGCATA  
CTCAATGCCGAGAGGGATGTGGAGGGCGAGAGAGAGCGACTTCTCTCGGGCCCACAGCCTTACAGCTG  
TGGAGCACGGTATCCTCTGCCGAAACAGAGGTTGGACAAGACCGGAGGGGTCTCCTAGTTCCAAAGGA  
+  
FFFFFFFFFFFFFFFFFFFFFFFFFFFFFFFFFFFFFFFFFFFFFFFFFFFFFFFFFFFFFFFFFFFFFFFF  
FFFFFFFFFFFFFFFFFFFFFFFFFFFFFFFFFFFFFFFFFFFFFFFFFFFFFFFFFFFFFFFFFFFFFFFF  
@A00155:342:HHGFNDSXY:1:2315:25753:31532 1:N:0:GAACCTAG+TCCGCATA  
CACCTCTGGCCTATGGTCATCTCAATGCCGAGAGGGATGTAGAGGGCGAGAGAGAGCGACTTCTCTCG  
GGCCCACAGCCTTACAGCTGTGGAGCACGGTATCCTCTGCCGAAACAGAGGTTGGACAAGACCGGAGG  
+  
:F:FFFF::FFFFF::FFF:FF:FFFFFFFFF:,FFFF:F:FFF:FFFFF,FFF::FFFFFFFFF,  
:FFFFFFFF::FFFFFFFFFFFFFFFFFFFF,FFFF:,FFFFFFFFFFFFFFFF:FFFFFFFFFFFF:FF:  
@A00155:342:HHGFNDSXY:1:2316:2293:4648 1:N:0:GAACCTAG+TCCGCATA  
GGGCGAGAGAGAGCGACTTCTCTCGGGCCCACAGCCTTACAGCTGTGGAGCACGGTATCCTCTGCCGA  
AACATAGGTTGGACAAGACCGGAGGGGTCTCCTAGTTCCAAAGGAGATGTACTCCGGGCTTGTTACG  
+  
FFFFF:FFFFF:FFFFFFFFFFFFFFFFFFFFFFFFFFFFFFFFFFFFFFFFFFFFFFFFFFFFFFFF:FFFFF  
FFFFFFFFFFFFFFFFFFFFFFFFFFFFFFFFFFFFFFFFFFFFFFFFFFFFFFFFFFFFFFFFFFFFFFFF  
@A00155:342:HHGFNDSXY:1:2316:28528:21151 1:N:0:GAACCTAG+TCCGCATA  
ATCTCAATGCCGAGAGGGATGTGGAGGGCGAGAGAGAGCGACTTCTCTCGGGCCCACAGCCTTACAGC  
TGTGGAGCACGGTATCCTCTGCCGAAACAGAGGTTGGACAAGACCGAAGGGGTCTCCTAGTTCCAAAG  
+

FFFFFFFFFFFFFFFFFFFFFFFFFFFFFFFFFFFFFFFFFFFFFFFFFFFFFFFFFFFFFFFFFFFFFFFFFFFF  
FFFFFFFFFFFFFFFFFFFFFFFFFFFFFFFFFFFFFFFFFFFFFFFFFFFFFFFFFFFFFFFFFFFFFFFFFFFF:FFFFFFFFFFFFFFFFFFFFFFFFFFFFFFFFFFFFFFFFFFFFFFFFFFFFFFFFFFFFFFFFFFFFFFFFFFFF:FFF  
@A00155:342:HHGFNDSXY:1:2316:9263:22576 1:N:0:GAACCTAG+TCCGCATA  
CTTCTCTCGGGCCACAGCCTTACAGCTGTGGAGCACGGTATCCTCTGCCGAAACAGAGGTTGGACAA  
GACCGGAGGGGTCTCCTAGTTCCAAAGGAGATGTACTCCGGGCTTGTTACGACCTACCGTGTAAGTC  
+  
FFFFFFFFFFFFFFFFFFFFFFFFFFFFFFFFFFFFFFFFFFFFFFFFFFFFFFFFFFFFFFFFFFFFFFFFFFFF  
FFFFFFFFFFFFFFFFFFFFFFFFFFFFFFFFFFFFFFFFFFFFFFFFFFFFFFFFFFFFFFFFFFFFFFFFFFFF:FFFFFFFFFFFFFFFFFFFFFFFFFFFFFFFFFFFFFFFFFFFFFFFFFFFFFFFFFFFFFFFFFFFFFFFFFFFF:F  
@A00155:342:HHGFNDSXY:1:2317:14931:4429 1:N:0:GAACCTAG+TCCGCATA  
ACAGCTGTGGAGCACGGTATCCTCTGCCGAAACAGAGGTTGGACAAGACCGGAGGGGTCTCCTAGTTCC  
CAAAGGAGATGTACTCCGGGCTTGTTACGACCTACCGTGTAAGTCGTAGTCTAGTAGGCTACCTGAC  
+  
FFFFFFFFFFFFFFFFFFFFFFFFFFFFFFFFFFFFFFFFFFFFFFFFFFFFFFFFFFFFFFFFFFFFFFFFFFFF  
FFFFFFFFFFFFFFFFFFFFFFFFFFFFFFFFFFFFFFFFFFFFFFFFFFFFFFFFFFFFFFFFFFFFFFFFFFFF:FFFFFFFFFFFFFFFFFFFFFFFFFFFFFFFFFFFFFFFFFFFFFFFFFFFFFFFFFFFFFFFFFFFFFFFFFFFF:F  
@A00155:342:HHGFNDSXY:1:2317:15203:4586 1:N:0:GAACCTAG+TCCGCATA  
CTGTGGAGCACGGTATCCTCTGCCGAAACAGAGGTTGGACAAGACCGGAGGGGTCTCCTAGTTCCAAA  
GGAGATGTACTCCGGGCTTGTTACGACCTACCGTGTAAGTCGTAGTCTAGTAGGCTACCTGAC  
+  
:F:F::F:FFF::FFFFFFFF:FF:FFFFFF,F:,F,,FF,FFFFFF,:FF,FFF:FF:FF:FF:,FFF  
:FF:FF:,FFF,F,FFFFFF:FFFF,F,:F,F,FFFFFF:FFFF:,FFFF:FF,F,F:FFFF  
@A00155:342:HHGFNDSXY:1:2317:2645:29716 1:N:0:GAACCTAG+TCCGCATA  
AGGGATGTGGAGGGCGAGAGAGAGCGACTTCTCTCGGGCCACAGCCTTACAGCTGTGGAGCACGGTA  
TCCTCTGCCGAAACAGAGGTTGGACAAGACCGGAGGGGTCTCCTAGTTCCAAAGGAGATGTACTCCGG  
+  
FFFFF,FFFFFFFFFFFFFFFFFFFFFFFFFFFFFFFFFFFFFFFFFFFFFFFFFFFFFFFFFFFFFFFFFFFF  
FFFFFFFFFFFFFFFFFFFFFFFFFFFFFFFFFFFFFFFFFFFFFFFFFFFFFFFFFFFFFFFFFFFFFFFFFFFF  
@A00155:342:HHGFNDSXY:1:2317:30906:33160 1:N:0:GAACCTAG+TCCGCATA  
GGCGAGAGAGAGCGACTTCTCTCGGGCCACAGCCTTACAGCTGTGGAGCACGGTATCCTCTGCCGAA  
ACAGAGGTTGGACAAGACCGGAGGGGTCTCCTAGTTCCAAAGGAGATGTACTCCGGGCTTGTTACGCA  
+  
FFFFFFFFFFFFFFFFFFFFFFFFFFFFFFFFFFFFFFFFFFFFFFFFFFFFFFFFFFFFFFFFFFFFFFFFFFFF:FFFFFFFFFFFFFFFFFFFFFFFFFFFFFFFFFFFFFFFFFFFFFFFFFFFFFFFFFFFFFFFFFFFFFFFFFFFF  
FFFFFFFFFFFFFFFFFFFFFFFFFFFFFFFFFFFFFFFFFFFFFFFFFFFFFFFFFFFFFFFFFFFFFFFFFFFF  
@A00155:342:HHGFNDSXY:1:2319:12274:4679 1:N:0:GAACCTAG+TCCGCATA  
CGACTTCTCTCGGGCCACAGCCTTACAGCTGTGGAGCACGGTATCCTCTGCCGAAACAGAGGTTGGA  
CAAGACCGGAGGGGTCTCCTAGTTCCAAAGGAGATGTACTCCGGGCTTGTTACGACCTACCGTGTA  
+  
FFFFFFFFFFFFFFFFFFFFFFFFFFFFFFFFFFFFFFFFFFFFFFFFFFFFFFFFFFFFFFFFFFFFFFFFFFFF  
FF:FFFFFFFFFFFFFFFFFFFFFFFFFFFFFFFFFFFFFFFFFFFFFFFFFFFFFFFFFFFFFFFFFFFFFFFFFFFF:FFF  
@A00155:342:HHGFNDSXY:1:2319:9616:19179 1:N:0:GAACCTAG+TCCGCATA  
GAGCGACTTCTCTCGGGCCACAGCCTTACAGCTATGGAGCACGGTATCCTCTGCCGAAACAGAGGTT  
GGACAAGACCGGAGGGGTCTCCTAGTTCCAAAGGAGATGTACTCCGGGCTTGTTACGACCTACCGTG  
+  
FFFFFFFFFFFFFFFFFFFFFFFFFFFFFFFFFFFFFFFFFFFFFFFFFFFFFFFFFFFFFFFFFFFFFFFFFFFF  
FFFFFFFFFFFFFFFFFFFFFFFFFFFFFFFFFFFFFFFFFFFFFFFFFFFFFFFFFFFFFFFFFFFFFFFFFFFF  
@A00155:342:HHGFNDSXY:1:2319:31647:36010 1:N:0:GAACCTAG+TCCGCATA  
CTTCTCTCGGGCCACAGCCTTACAGCTGTGGAGCACGGTATCCTCTGCCGAAACAGAGGTTGGACAA  
GACCGGAGGGGTCTCCTAGTTCCAAAGGAGATGTACTCCGGGCTTGTTACGACCTACCGTGTAAGTC  
+  
FFFFFFFFFFFFFFFFFFFFFFFFFFFFFFFFFFFFFFFFFFFFFFFFFFFFFFFFFFFFFFFFFFFFFFFFFFFF  
FFFFFFFFFFFFFFFFFFFFFFFFFFFFFFFFFFFFFFFFFFFFFFFFFFFFFFFFFFFFFFFFFFFFFFFFFFFF  
@A00155:342:HHGFNDSXY:1:2320:20591:18646 1:N:0:GAACCTAG+TCCGCATA  
TTAGATCAGCTGTGTCCACTTAAGGACTCACCTCTGGCCTATGGTCATCTCAATGCCGAGAGGGATGT  
AGAGGGCGAGAGAGAGCGACTTCTCTCGGGCCACAGCCTTACAGCTGTGGAGCACGGTATCCTCTGC

FFFFFFFFFFFFFFFFFFFFFFFFFFFFFFFFFFFFFFFFFFFFFFFFFFFFFFFFFFFFFFFFFFFFFFFF  
FFFFFFFFFFFFFFFFFFFFFFFFFFFFFFFFFFFFFFFFFFFFFFFFFFFFFFFFFFFFFFFFFFFFFFFF  
@A00155:342:HHGFNDSXY:1:2320:32750:26334 1:N:0:GAACCTAG+TCCGCATA  
ATGCCGAGAGGGATGTGGAGGGCGAGAGAGAGCGACTTCTCTCGGGCCCACAGCTTTACAGCTGTGGA  
GCACGGTATCCTCTGCCGAAACAGAGGTTGGACAAGACCGGAGGGGTCTCCTAGTTCCAAAG  
+  
FFFFFFFFFFFFFFFFFFFFFFFFFFFFFFFFFFFFFFFFFFFFFFFFFFFFFFFFFFFFFFFFFFFFFFFF  
FFFFFFFFFFFFFFFFFFFFFFFFFFFFFFFFFFFFFFFFFFFFFFFFFFFFFFFFFFFFFFFFFFFFFFFF  
@A00155:342:HHGFNDSXY:1:2320:31828:27806 1:N:0:GAACCTAG+TCCGCATA  
ATGCCGAGAGGGATGTGGAGGGCGAGAGAGAGCGACTTCTCTCGGGCCCACAGCTTTACAGCTGTGGA  
GCACGGTATCCTCTGCCGAAACAGAGGTTGGACAAGACCGGAGGGGTCTCCTAGTTCCAAAG  
+  
FFFFFFFFFFFFFFFFFFFFFFFFFFFFFFFFFFFFFFFFFFFFFFFFFFFFFFFFFFFFFFFFFFFFFFFF  
FFFFFFF:FFFFFFFFFFFFFFFFFFFFFFFFFFFFFFFFFFFFFFFFFFFFFFFFFFFFFFFFFFFFFFF:  
@A00155:342:HHGFNDSXY:1:2321:15121:5541 1:N:0:GAACCTAG+TCCGCATA  
ACTTCTCTCGGGCCCACAGCCTTACAGCTGTGGAGCACGGTATCCTCTGCCGAAACAGAGGTTGGACA  
AGACCGGAGGGGTCTCCTAGTTCCAAAGGAGATGTACTCCGGGCTTGTTACGACCTACCGTGTAAGT  
+  
FFFFFFFFFFFFFFFFFFFFFFFFFFFFFFFFFFFFFFFFFFFFFFFFFFFFFFFFFFFFFFFFFFFFFFFF  
FFFFFFFFFFFFFFFFFFFFFFFFFFFFFFFFFFFFFFFFFFFFFFFFFFFFFFFFFFFFFFFFFFFFFFFF  
@A00155:342:HHGFNDSXY:1:2321:4933:25723 1:N:0:GAACCTAG+TCCGCATA  
ATCTCAATGCCGAGAGGGATGTGGAGGGCGAGAGAGAGCGACTTCTCTCGGGCCCACAGCCTTACAGC  
TGTGGAGCACGGTATCCTCTGCCGAAACAGAGGTTGGACAAGACCGGAGGGGTCTCCTAGTTCCAAAG  
+  
FFFFFFFFFFFFFFF:FFFFFFFFFFFFFFFFFFFFFFFFFFFFFFFFFFFFFFFFFFFFFFFFFFFFFFF:FFFF  
FFFFFFFFFFFFFFFFFFFFFFFFFFFFFFFFFFFFFFFFFFFFFFFFFFFFFFFFFFFFFFFFFFFFFFF:FFFFFFFF  
@A00155:342:HHGFNDSXY:1:2322:10004:8954 1:N:0:GAACCTAG+TCCGCATA  
AGAGAGAGCGACTTCTCTCGGGCCCACAGCCTTACAGCTGTGGAGCACGGTATCCTCTGCCGAAACAG  
AGGTTGGACAAGACCGGAGGGGTCTCCTGGTTCCAAAGGAGATGTACTCCGGGCTTGTTACGACCT  
+  
FFFFFFFFFFFFFFFFFFFFFFFFFFFFFFFFFFFFFFFFFFFFFFFFFFFFFFFFFFFFFFFFFFFFFFF,FFFFFFF:FFFFF  
FFFFFFFFFFFFFFFFFFFFFFFFFFFFFFFFFFFFFFFFFFFFFFFFFFFFFFFFFFFFFFFFFFFFFFF:FFFFFFFFFFFFFFF  
@A00155:342:HHGFNDSXY:1:2322:11595:13463 1:N:0:GAACCTAG+TCCGCATA  
CCTACTAGACTCCGACCGTCATGGGGGTTCAAACCCATGCCCCACCACACCGCCTTAGATCAGCTGTG  
TCCACTTAAGGACTCACCTCTGGCCTATGGTCATCTCAATGCCGAGAGGGATGTGGAGGGCGAGAGAG  
+  
FFFFFFFFFFFFFFFFFFFFFFFFFFFFFFFFFFFFFFFFFFFFFFFFFFFFFFFFFFFFFFFFFFFFFFF:FFFFFFFFFFFFFFF  
FFFFFFFFFFFFFFFFFFFFFFFFFFFFFFFFFFFFFFFFFFFFFFFFFFFFFFFFFFFFFFFFFFFFFFF  
@A00155:342:HHGFNDSXY:1:2322:21106:18787 1:N:0:GAACCTAG+TCCGCATA  
CTCTGCCGAAACAGAGGTTGGACAAGACCGGAGGGGTCTCCTAGTTCCAAAGGAGATGTACTCCGGGC  
TTGTTACGACCTACCGTGTAAGTCGTAGTCTAGTAGGCTACCTGACGAGTCCTTTTAGGACGAAAC  
+  
FFFFFFFFFFFFFFF:FFFFFFFFFFFFFFFFFFFFFFFFFFFFFFFFFFFFFFFFFFFFFFFFFFFFFFF  
FFFFFFFFFFFFFFFFFFFFFFFFFFFFFFFFFFFFFFFFFFFFFFFFFFFFFFFFFFFFFFFFFFFFFFF:FFFFFFFFFFFFFFF:  
@A00155:342:HHGFNDSXY:1:2322:12364:20556 1:N:0:GAACCTAG+TCCGCATA  
AGAGAGAGCGACTTCTCTCGGGCCCACAGCCTTACAGCTGTGGAGCACGGTATCCTCTGCCGAAACAG  
AGGTTGGACAAGACCGGAGGGGTCTCCTAGTTCCAAAGGAGATGTACTCCGGGCTTGTTACGACCTA  
+  
FFFFFFFFFFFFFFFFFFFFFFFFFFFFFFF:FFFFFFFFFFFFFFFFFFFFFFFFFFFFFFFFFFFFFFFFFFFFFFF  
FFFFFFFFFFFFFFFFFFFFFFFFFFFFFFFFFFFFFFFFFFFFFFFFFFFFFFFFFFFFFFFFFFFFFFF:  
@A00155:342:HHGFNDSXY:1:2322:12373:20572 1:N:0:GAACCTAG+TCCGCATA  
AGAGAGAGCGACTTCTCTCGGGCCCACAGCCTTACAGCTGTGGAGCACGGTATCCTCTGCCGAAACAG  
AGGTTGGACAAGACCGGAGGGGTCTCCTAGTTCCAAAGGAGATGTACTCCGGGCTTGTTACGACCTA  
+

FFFFFFFFFFFFFF:FFFFFFFFFFFFFF,FFFF:F:FFFF:FFFF::FFFF,FFFFFFFFF::  
FFFFFFFFFFFF:FFFFFF:FFFFFFFFFFFFFF:FF:FFFFFFFF:FF:F:,F:F:FFFFFF:F  
@A00155:342:HHGFNDSXY:1:2322:25608:24643 1:N:0:GAACCTAG+TCCGCATA  
CTTCTCTCGGGCCACAGCCTTACAGCTGTGGAGCACGGTATCCTCTGCCGAAACAGAGGTTGGACAA  
GACCGGAGGGGTCTCCTGGTTCCAAAGGAGATGTACTCCGGGCTTGTTACGACCTACCGTGTAAGTC  
+  
FFFFFFFFFFFFFFFFFFFFFFFFFFFFFFFFFFFFFFFFFFFFFFFFFFFFFFFFFFFFFFFFFFFF  
FFFFFFFFFFFFFFFFFFFFFFFFFFFFFFFFFFFFFFFFFFFFFFFFFFFFFFFFFFFFFFFFFFFF  
@A00155:342:HHGFNDSXY:1:2322:5593:28651 1:N:0:GAACCTAG+TCCGCATA  
GAGAGGGATGTGGAGGGCGAGAGAGAGCGACTTCTCTCGGGCCACAGCCTTACAGCTGTGGAGCACG  
GTATCCTCTGCCGAAACAGAGGTTGGACAAGACCGGAGGGGTCTCCTGGTTCCAAAGGAGATGTACT  
+  
FFFFFFFFFFFFFFFFFFFFFFFFFFFFFFFFFFFFFFFFFFFFFFFFFFFFFFFFFFFFFFFFFFFF  
FFFFFFFFFFFFFFFFFFFFFFFFFFFFFFFFFFFFFFFFFFFFFFFFFFFFFFFFFFFFFFFFFFFF:FFFFFFFFF  
@A00155:342:HHGFNDSXY:1:2322:3821:31501 1:N:0:GAACCTAG+TCCGCATA  
ATCTCAATGCCGAGAGGGATGTAGAGGGCGAGAGAGAGCGACTTCTCTCGGGCCACAGCCTTACAGC  
TGTGGAGCACGGTATCCTCTGCCGAAACAGAGGTTGGACAAGACCGGAGGGGTCTCCTAGTTCCAAAG  
+  
FFFFFFFFFFFFFFFFFFFFFFFFFFFFFFFFFFFFFFFFFFFFFFFFFFFFFFFFFFFFFFFFFFFF,FFFF  
FFFFFFFFFFFFFFFFFFFFFFFFFFFFFFFFFFFFFFFFFFFFFFFFFFFFFFFFFFFFFFFFFFFF  
@A00155:342:HHGFNDSXY:1:2323:4191:2487 1:N:0:GAACCTAG+TCCGCATA  
CTTCTCTCGGGCCACAGCCTTACAGCTGTGGAGCACGGTATCCTCTGCCGAAACAGAGGTTGGACAA  
GACCGGAGGGGTCTCCTGGTTCCAAAGGAGATGTACTCCGGGCTTGTTACGACCTACCGTGTAAGTC  
+  
FFFFFFFFFFFFFFFFFFFFFFFFFFFFFFFFFFFFFFFFFFFFFFFFFFFFFFFFFFFFFFFFFFFF  
FFFFFFFFFFFFFFFFFFFFFFFFFFFFFFFFFFFFFFFFFFFFFFFFFFFFFFFFFFFFFFFFFFFF:FFF  
@A00155:342:HHGFNDSXY:1:2323:2862:5666 1:N:0:GAACCTAG+TCCGCATA  
GGATGTAGAGGGCGAGAGAGAGCGACTTCTCTCGGGCCACAGCCTTACAGCTGTGGAGCACGGTATC  
CTCTGCCGAAACAGAGGTTGGACAAGACCGGAGGGGTCTCCTAGTTCCAAAGGAGATGTACT  
+  
FFFFFFFFFFFFFFFFFFFFFFFFFFFFFFFFFFFFFFFFFFFFFFFFFFFFFFFFFFFFFFFFFFFF  
FFFFFFFFFFFFFFFFFFFFFFFFFFFFFFFFFFFFFFFFFFFFFFFFFFFFFFFFFFFFFFFFFFFF  
@A00155:342:HHGFNDSXY:1:2323:11333:13636 1:N:0:GAACCTAG+TCCGCATA  
TCGGCAGAGGATACCGTGCTCCACAGCTGTAAGGCTGTGGGCCCGAGAGAAGTCGCTCTCTCTCGCCC  
TTCACATCCCTCTCGGCATTGAGATGACCATAGGCCAGAGGTGAGTCCTTAAGTGGACACA  
+  
FFFFFFFFFFFFFFFFFFFFFFFFFFFFFFFFFFFFFFFFFFFFFFFFFFFFFFFFFFFFFFFFFFFF  
FFFFFFFFFFFFFFFFFFFFFFFFFFFFFFFFFFFFFFFFFFFFFFFFFFFFFFFFFFFFFFFFFFFF  
@A00155:342:HHGFNDSXY:1:2323:20509:22357 1:N:0:GAACCTAG+TCCGCATA  
AGAGCGACTTCTCTCGGGCCACAGCCTTACAGCTGTGGAGCACGGTATCCTCTGCCGAAACAGAGGT  
TGGACAAGACCGGAGGGGTCTCCTAGTTCCAAAGGAGATGTACTCCAGGCTTGTTACGACCTACCGT  
+  
FFFFFFFFFFFFFFFFFFFFFFFFFFFFFFFFFFFF:FFFFFFFFFFFFFFFFFFFFFFFFFFFFFFFFFFFF  
FFFFFFFFFFFFFFFFFFFFFFFFFFFFFFFFFFFFFFFFFFFFFFFFFFFFFFFFFFFFFFFFFFFF  
@A00155:342:HHGFNDSXY:1:2323:22336:22576 1:N:0:GAACCTAG+TCCGCATA  
TGGTCATCTCAATGCCGAGAGGGATGTGGAGGGCGAGAGAGAGCGACTTCTCTCGGGCCACAGCCTT  
ACAGCTGTGGAGCACGGTATCCTCTGCCGAAACAGAGGTTGGACAAGACCGGAGGGGTCTCCTAGTTC  
+  
FFFFFFFFFFFFFFFFFFFFFFFFFFFFFFFFFFFFFFFFFFFFFFFFFFFFFFFFFFFFFFFFFFFF  
FFFFFFFFFFFFFFFFFFFFFFFFFFFFFFFFFFFFFFFFFFFFFFFFFFFFFFFFFFFFFFFFFFFF:FFFFF  
@A00155:342:HHGFNDSXY:1:2323:12807:23171 1:N:0:GAACCTAG+TCCGCATA  
GGGCGAGAGAGAGCGACTTCTCTCGGGCCACAGCCTTACAGCTGTGGAGCACGGTATCCTCTGCCGA  
AACAGAGGTTGGACAAGACCGGAGGGGTCTCCTGGTTCCAAAGGAGATGTACTCCGGGCTTGTTAC  
+

```
FF
FFFFFFFFFFFFFFFFFFFFFFFFFFFFFFFFFFFFFFFFFFFFFFFFFFFFFFFFFFFF:FF,FFFFFF:FFFFFFFF:FF:FF
FFFFFFFFFFFFFFFFFFFFFFFFFFFFFFFFFFFFFFFFFFFFFFFFFFFFFFFFFFFFFFFFFFFFFFFFFFFFFFFFFFFFFFFF
@A00155:342:HHGFNDSXY:1:2323:7753:30170 1:N:0:GAACCTAG+TCCGCATA
TGTCCTTAAGGACTCACCTCTGGCCTATGGTCATCTCAATGCCGAGAGGGATGTGGAGGGTGAGAG
AGAGCGACTTCTCTCGGGCCCACAGCCTTACAGCTGTGGAGCACGGTATCCTCTGCCGAAACAGAGGT
+
FFFFFFFFFFFFFF:FFFFFFFFFFFFFFFFFFFFFFFFFFFFFFFFFFFFFFFFFFFFFFFFFFFFFFFFFFFFFFFFFFFFFFF
FFFFFFFFFFFFFFFFFFFFFFFFFFFFFFFFFFFFFFFFFFFFFFFFFFFFFFFFFFFFFFFFFFFFFFFFFFFFFFFFFFFFFFF
@A00155:342:HHGFNDSXY:1:2323:5385:31454 1:N:0:GAACCTAG+TCCGCATA
GGATGTGGAGGGCGAGAGAGAGCGACTTCTCTCGGGCCCACAGCCTTACAGCTGTGGAGCACGGTATC
CTCTGCCGAAACAGAGGTTGGACAAGACCGGAGGGGTCTCCTGGTTCCAAAGGAGATGTACTCC
+
FFFFFFFFFFFFFFFFFFFFFFFFFFFFFFFFFFFFFFFFFFFFFFFFFFFFFFFFFFFFFFFFFFFFFFFFFFFFFFFFFFFFFFF
FFFFFFFFFFFFFFFFFFFFFFFFFFFFFFFFFFFFFFFFFFFFFFFFFFFFFFFFFFFFFFFFFFFFFFFFFFFFFFFFFFFFFFF
@A00155:342:HHGFNDSXY:1:2324:5656:5494 1:N:0:GAACCTAG+TCCGCATA
TGTTTCGGCAGAGGATACCGTGCTCCACAGCTGTAAGGCTGTGGGCCCGAGAGAAGTCGCTCTCTCTC
GCCCTCCACATCCCTCTCGGCATAGAGATGACCATAGGCCAGAGGTGAGTCCTTAAGTGGACACAGCT
+
FFFFFFFFFFFFFFFFFFFFFFFFFFFFFFFFFFFFFFFFFFFFFFFFFFFFFFFFFFFFFFFFFFFFFFFFFFFFFFFFFFFFFFF
FFFFFFFFFFFFFFFFFFFFFFFFFFFFFFFFFFFFFFFFFFFFFFFFFFFFFFFFFFFFFFFFFFFFFFFFFFFFFFFFFFFFFFF
@A00155:342:HHGFNDSXY:1:2324:29984:22263 1:N:0:GAACCTAG+TCCGCATA
AGAGAGAGCGACTTCTCTCGGGCCCACAGCCTTACAGCTGTGGAGCACGGTATCCTCTGCCGAAACAG
AGGTTGGACAAGACCGGAGGGGTCTCCTGGTTCCAAAGGAGATGTACTCCGGGCTTGTTACGACCTA
+
FFFFFFFFFFFFFF:FFFFFFFFFFFFFFFFFFFFFFFFFFFFFFFFFFFFFFFFFFFFFFFFFFFFFFFFFFFFFFFF:F
FFFFFFFFF:FFFFFFFFFFFFFFFFFFFFFFFFFFFFFFFFFFFFFFFFFFFFFFFFFFFFFFFFFFFFFFFF:FFF
@A00155:342:HHGFNDSXY:1:2325:20130:5290 1:N:0:GAACCTAG+TCCGCATA
AAAGACTCACCTCTGGCCTATGGTCATCTCAATGCCGAGAGGGATGTGGAGGGCGAGAGAGAGCGACT
TCTCTCGGGCCCACAGCCTTACAGCTGTGGAGCACGGTATCCTCTGCCGAAACAGAGGTTGGACAAGA
+
FFFFFFFFFFFFFFFFFFFFFFFFFFFFFFFFFFFFFFFFFFFFFFFFFFFFFFFFFFFFFFFFFFFFFFFFFFFFFFFFFFFFFFF
FFFFFFFFFFFFFFFFFFFFFFFFFFFFFFFFFFFFFFFFFFFFFFFFFFFFFFFFFFFFFFFFFFFFFFFFFFFFFFFFFFFFFFF
@A00155:342:HHGFNDSXY:1:2325:10176:6277 1:N:0:GAACCTAG+TCCGCATA
TTACAGCTGTGGAGCACGGTATCCTCTGCCGAAACAGAGGTTGGACAAGACCGGAGGGGTCTCCTGGT
TCCAAAGGAGATGTACTCCGGGCTTGTTACGACCTACCGTGTAAGTCGTAGTCTAGTAGGCTACCTG
+
:F:FFFFFFFFFFFFFFFFFFFFFFFFFFFFFFFFFFFFFFFFFFFFFFFFFFFFFFFFFFFFFFFFFFFFFFFFFFFFFFFFF
FFFFFFFFFFFFFFFFFFFFFFFFFFFFFFFFFFFFFFFFFFFFFFFFFFFFFFFFFFFFFFFF:F,FFFFFF,FFFF,:FFFFFFFF
@A00155:342:HHGFNDSXY:1:2325:19388:7733 1:N:0:GAACCTAG+TCCGCATA
CGACTTCTCTCGGGCCCACAGCCTTACAGCTGTGGAGCACGGTATCCTCTGCCGAAACAGAGGTTGGA
CAAGACCGGAGGGGTCTCCTAGTTCCAAAGGAGATGTACTCCGGGCTTGTTACGACCTACC
+
FFFFFFFFFFFFFFFFFFFFFFFFFFFFFFFFFFFFFFFFFFFFFFFFFFFFFFFFFFFFFFFFFFFFFFFFFFFFFFFFFFFFFFF
FF:FFFFFFFFFFFFFFFFFFFFFFFFFFFFFFFFFFFFFFFFFFFFFFFFFFFFFFFFFFFFFFFFFFFFFFFFFFFFFFFFF
@A00155:342:HHGFNDSXY:1:2325:11514:11068 1:N:0:GAACCTAG+TCCGCATA
AGGGATGTGGAGGGCGAGAGAGAGCGACTTCTCTCGGGCCCACAGCCTTACAGCTGTGGAGCACGGTA
TCCTCTGCCGAAACAGAGGTTGGACAAGACCGGAGGGGTCTCCTAGTTCCAAAGGAGATGTACTCCGG
+
FFFFFFFFFFFFFFFFFFFFFFFFFFFFFFFFFFFFFFFFFFFFFFFFFFFFFFFFFFFFFFFFFFFFFFFFFFFFFFFFFFFFFFF
FFFFFFFFFFFFFFFFF:FFFFFFFFFFFFFFFFFFFFFFFFFFFFFFFFFFFFFFFFFFFFFFFFFFFFFFFFFFFFFFFFF
@A00155:342:HHGFNDSXY:1:2325:24053:15374 1:N:0:GAACCTAG+TCCGCATA
CAGCCTTACAGCTGTGGAGCACGGTATCCTCTGCCGAAACAGAGGTTGGACAAGACCGGAGGGGTCTC
CTAGTTCCAAAGGAGATGTACTCCGGGCTTGTTACGACCTACCGTGTAAGTCGTAGTCTAGTAGGCT
```

FFFFFFFFFFFFFFFFFFFFFFFFFFFFFFFFFFFFFFFFFFFFFFFFFFFFFFFFFFFFFFFFFFFFF:FFFFFFFFFFFFFFFFFFFFFFFFFFFFFF  
FFFFFFFFFFFFFFFFFFFFFFFFFFFFFFFFFFFFFFFFFFFFFFFFFFFFFFFFFFFFFFFFFFFFFFFFF@A00155:342:HHGFNDSXY:1:2325:29333:15843 1:N:0:GAACCTAG+TCCGCATA  
CTTCTCTCGGGCCCACAGCCTTACAGCTGTGGAGCACGGTATCCTCTGCCGAAACAGAGGTTGGACAA  
GACCGGAGGGGTCTCCTAGTTCCAAAGGAGATGTACTCCGGGCTTGTTACGACCTACCGTGTAAGTC  
+  
FFFFFFFFFFFFFFFFFFFFFFFFFFFFFFFFFFFFFFFFFFFFFFFFFFFFFFFFFFFFFFFFFFFFF:FFFFFFFF  
FFFFFFFFFFFFFFFFFFFFFFFFFFFFFFFFFFFFFFFFFFFFFFFFFFFFFFFFFFFFFFFFFFFFFFFFF@A00155:342:HHGFNDSXY:1:2325:29062:19132 1:N:0:GAACCTAG+TCCGCATA  
CGAGAGAGAGCGACTTCTCTCGGGCCCACAGCCTTACAGCTGTGGAGCACGGTATCCTCTGCCGAAAC  
AGAGGTTGGACAAGACCGGAGGGGTCTCCTAGTTCCAAAGGAGATGTACTCCGGGCTTGTTACGACC  
+  
FFFFFFFFFFFFFFFFFFFFFFFFFFFFFFFFFFFFFFFFFFFFFFFFFFFFFFFFFFFFFFFFFFFFF:FFFFFFFF  
FFFFFFFFFFFFFFFFFFFFFFFFFFFFFFFFFFFFFFFFFFFFFFFFFFFFFFFFFFFFFFFFFFFFFFFFF@A00155:342:HHGFNDSXY:1:2326:22182:10285 1:N:0:GAACCTAG+TCCGCATA  
AGAGAGAGCGACTTCTCTCGGGCCCACAGCCTTACAGCTGTGGAGCACGGTATCCTCTGCCGAAACAG  
AGGTTGGACAAGACCGGAGGGGTCTCCTAGTTCCAAAGGAGATGTACTCCGGGCTTGTTACGAC  
+  
FFFFFFFFF:FFFFFFFFFFFFFFFFFFFFFFFFFFFFFFFFFFFFFFFFFFFFFFFFFFFFFFFFFFFFF  
FFFFFFFFFFFFFFFFFFFFFFFFFFFFFFFFFFFFFFFFFFFFFFFFFFFFFFFFFFFFFFFFFFFFFFFFF@A00155:342:HHGFNDSXY:1:2326:21025:16203 1:N:0:GAACCTAG+TCCGCATA  
GAGCGACTTCTCTCGGGCCCACAGCCTTACAGCTATGGAGCACGGTATCCTCTGCCGAAACAGAGGTT  
GGACAAGACCGGAGGGGTCTCCTAGTTCCAAAGGAGATGTACTCCGGGCTTGTTACGACCTACCGTG  
+  
FFFFFFFFFFFFFFFFFFFFFFFFFFFFFFFFFFFFFFFFFFFFFFFFFFFFFFFFFFFFFFFFFFFFF:FFFFFFFF  
FFFFFFFFFFFFFFFFFFFFFFFFFFFFFFFFFFFFFFFFFFFFFFFFFFFFFFFFFFFFFFFFFFFFFFFFF@A00155:342:HHGFNDSXY:1:2326:32018:18490 1:N:0:GAACCTAG+TCCGCATA  
CTTCTCTCGGGCCCACAGCCTTACAGCTGTGGAGCACGGTATCCTCTGCCGAAACAGAGGTTGGACAA  
GACCGGAGGGGTCTCCTGGTTCCAAAGGAGATGTACTCCGGGCTTGTTACGACCTACCGTGTAAGTC  
+  
FFFFFFFFFFFFFFFFFFFFFFFFFFFFFFFFFFFFFFFFFFFFFFFFFFFFFFFFFFFFFFFFFFFFF:  
FFFFFFFFFFFFFFFFFFFFFFFFFFFFFFFFFFFFFFFFFFFFFFFFFFFFFFFFFFFFFFFFFFFFFFFFF:FFFFFF:FFF  
@A00155:342:HHGFNDSXY:1:2326:32832:32049 1:N:0:GAACCTAG+TCCGCATA  
TTAAGGACTCACCTCTGGCCTATGGTCATCTCAATGCCGAGAGGGATGTAGAGGGCGAGAGAGAGCGA  
CTTCTCTCGGGCCCACAGCCTTACAGCTGTGGAGCACGGTATCCTCTGCCGAAACAGAGGTTGGACAA  
+  
FFFF,FFFFFFFFFFFFFFFFFFFFFFFFFFFFFFFFFFFFFFFFFFFFFFFFFFFFFFFFFFFFFF:FFFFFFFFFF  
:FFFFFFFFFFFFFFFFFFFFFFFFFFFFFFFFFFFFFFFFFFFFFFFFFFFFFFFFFFFFFFFFFFFFFFFFF:FFFF:FFFFFFFFFFFFFFFF  
@A00155:342:HHGFNDSXY:1:2327:9561:2362 1:N:0:GAACCTAG+TCCGCATA  
CGGCAGAGGATACCGTGCTCCACAGCTGTAAGGCTGTGGGCCCGAGAGAAGTCGCTCTCTCTCGCCCT  
CTACATCCCTCTCGGCATTGAGATGACCATAGGCCAGAGGTGAGTCCTTAAGTGACACAGCTGATCT  
+  
FFFFFFFFFFFFFFFFFFFFFFFFFFFFFFFFFFFFFFFFFFFFFFFFFFFFFFFFFFFFFFFFFFFFF:  
FFFFFFFFFFFFFFFFFFFFFFFFFFFFFFFFFFFFFFFFFFFFFFFFFFFFFFFFFFFFFFFFFFFFFFFFF,FFFFFFFFFFFFFFFFFFFFFFFFFFFFFFFF  
@A00155:342:HHGFNDSXY:1:2327:31828:21292 1:N:0:GAACCTAG+TCCGCATA  
GTCATCTCAATGCCGAGAGGGATGTGGAGGGCGAGAGAGAGCGACTTCTCTCGGGCCCACAGCCTTAC  
AGCTGTGGAGCACGGTATCCTCTGCCGAAACAGAGGTTGGACAAGACCGGAGGGGTCTCCTAGTTCOA  
+  
FFFFFFFFFFFFFFFFFFFFFFFFFFFFFFFFFFFFFFFFFFFFFFFFFFFFFFFFFFFFFFFFFFFFF:FFFFFFFF  
FFFFFFFFFFFFFFFFFFFFFFFFFFFFFFFFFFFFFFFFFFFFFFFFFFFFFFFFFFFFFFFFFFFFFFFFF:FF  
@A00155:342:HHGFNDSXY:1:2327:12255:23093 1:N:0:GAACCTAG+TCCGCATA  
AGAGAGAGCGACTTCTCTCGGGCCCACAGCCTTACAGCTGTGGAGCACGGTATCCTCTGCCGAAACAG  
AGGTTGGACAAGACCGGAGGGGTCTCCTAGTTCCAAAGGAGATGTACTCCGGGCTTGTTACGACCTA

+  
+



```

FFFFFFFFFFFFFFFFFFFFFFFFFFFFFFFFFFFFFFFFFFFFFFFFFFFFFFFFFFFFFFFFFFFFF:FFFFFFFFFFFFFFF
FFFFFFFFFFFFFFFFFFFFFFFFFFFFFFFFFFFFFFFFFFFFFFFFFFFFFFFFFFFFFFFFFFFFFFFF:F:
@A00155:342:HHGFNDSXY:1:2327:24017:23891 1:N:0:GAACCTAG+TCCGCATA
ATCTCAATGCCGAGAGGGATGTGGAGGGCGAGAGAGAGCGACTTCTCTCGGGCCCACAGCCTTACAGC
TGTGGAGCACGGTATCCTCTGCCGAAACAGAGGTTGGACAAGACCGGAGGGGTCTCCTAGTTCCAAAG
+
FFFFFFFFFFFFFFFFFFFFFFFFFFFFFFFFFFFFFFFFFFFFFFFFFFFFFFFFFFFFFFFFFFFFFFF
FFFFFFFFFFFFFFFFFFFFFFFFFFFFFFFFFFFFFFFFFFFFFFFFFFFFFFFFFFFFFFFFFFFFFFF:FFFFFFFFFFFFFFFFFFFFFFFFFFFFFFFFFFFFFFFF
@A00155:342:HHGFNDSXY:1:2327:31195:24580 1:N:0:GAACCTAG+TCCGCATA
CTCAATGCCGAGAGGGATGTAGAGGGCGAGAGAGAGCGACTTCTCTCGGGCCCACAGCCTTACAGCTG
TGGAGCACGGTATCCTCTGCCGAAACAGAGGTTGGACAAGACCGGAGGGGTCTCCTAGTTCCAAAGGA
+
FFFFFFFFFFFFFFFFFFFFFFFFFFFFFFFFFFFFFFFFFFFFFFFFFFFFFFFFFFFFFFFFFFFFFFF,FFFFFFFFFFFFFFF
FFFFFFFFFFFFFFFFFFFFFFFFFFFFFFFFFFFFFFFFFFFFFFFFFFFFFFFFFFFFFFFFFFFFFFF:FFFFFFFFFFFFFFFFFFFFFFFFFFFFFFFFFFFFFFFF
@A00155:342:HHGFNDSXY:1:2327:6922:30577 1:N:0:GAACCTAG+TCCGCATA
TTAAGGACTCACCTCTGGCCTATGGTCATCTCAATGCCGAGAGGGATGTGGAGGGCGAGAGAGAGCGA
CTTCTCTCGGGCCCACAGCCTTACAGCTGTGGAGCACGGTATCCTCTGCCGAAACAGAGGTTGGACAA
+
FFFFFFFFFFFFFFFFFFFFFFFFFFFFFFFFFFFFFFFFFFFFFFFFFFFFFFFFFFFFFFFFFFFFFFF:F
FFFFFFFFFFFFFFFFFFFFFFFFFFFFFFFFFFFFFFFFFFFFFFFFFFFFFFFFFFFFFFFFFFFFFFF:FFFFFFFFFFFFFFFFFFFFFFFFFFFFFFFFFFFFFFF
@A00155:342:HHGFNDSXY:1:2327:30563:32252 1:N:0:GAACCTAG+TCCGCATA
ACCTCTGTTTCGGCAGAGGATACCGTGCTCCACAGCTGTAAGGCTGTGGGCCCGAGAGAAGTCGCTCT
CTCTCGCCCTCCACATCCCTCTCGGCATTGAGATGACCATAGGCCAGAGGAGAGTCCTT
+
FFFFFFFFFFFFFFFFFFFFFFFFFFFFFFFFFFFFFFFFFFFFFFFFFFFFFFFFFFFFFFFFFFFFFFF
FFFFFFFFFFFFFFFFFFFFFFFFFFFFFFFFFFFFFFFFFFFFFFFFFFFFFFFFFFFFFFFFFFFFFFF:FFFFFFFFFFFFFFFFFFFFFFFFFFFFFFFFFFFFFFF
@A00155:342:HHGFNDSXY:1:2327:31033:32690 1:N:0:GAACCTAG+TCCGCATA
CAGCCTTACAGCTGTGGAGCACGGTATCCTCTGCCGAAACAGAGGTTGGACAAGACCGGAGGGGTCTC
CTAGTTCCAAAGGAGATGTACTCCGGGCTTGTTACACGACCTACCGTGTAAGTCGTAGTCTAGTAGGCT
+
FFFFFFF:FFFFFFFFFFFFFFFFFFFFFFFFFFFFFFFFFFFFFFFFFFFFFFFFFFFFFFFFFFFFFFFFFFFFFFF
FFFFFFFFFFFFFFFFFFFFFFFFFFFFFFFFFFFFFFFFFFFFFFFFFFFFFFFFFFFFFFFFFFFFFFF:FFFFFFFFF
@A00155:342:HHGFNDSXY:1:2327:30770:32831 1:N:0:GAACCTAG+TCCGCATA
CAGCCTTACAGCTGTGGAGCACGGTATCCTCTGCCGAAACAGAGGTTGGACAAGACCGGAGGGGTCTC
CTAGTTCCAAAGGAGATGTACTCCGGGCTTGTTACACGACCTACCGTGTAAGTCGTAGTCTAGTAGGCT
+
FFFFFFFFFFFFFFFFF:FFFFFFFFFFFFFFFFFFFFFFFFFFFFFFFFFFFFFFFFFFFFFFFFFFFFFFFFFFFFFFF
FFFFFFFFFFFFFFFFFFFFFFFFFFFFFFFFFFFFFFFFFFFFFFFFFFFFFFFFFFFFFFFFFFFFFFF:FFFFFFFFFFFFFFFFFFFFFFFFFFFFFFFFFFFFFFF
@A00155:342:HHGFNDSXY:1:2327:1542:36605 1:N:0:GAACCTAG+TCCGCATA
CGAGAGAGAGCGACTTCTCTCGGGCCCACAGCCTTACAGCTGTGGAGCACGGTATCCTCTGCCGAAAC
AGAGGTTGGACAAGACCGGAGGGGTCTCCTAGTTCCAAAGGAGATGTACTCCGGGCTTGTTACACGACC
+
FFFFFFFFFFFFFFFFFFFFFFFFFFFFFFFFFFFFFFFFFFFFFFFFFFFFFFFFFFFFFFFFFFFFFFF:
FFFFFFFFFFFFFFFFFFFFFFFFFFFFFFFFFFFFFFFFFFFFFFFFFFFFFFFFFFFFFFFFFFFFFFF:FFFFFF,,FFFFFFFFFFFFF:
@A00155:342:HHGFNDSXY:1:2328:29930:10895 1:N:0:GAACCTAG+TCCGCATA
TCCTCTGCCGAAACAGAGGTTGGACAAGACCGGAGGGGTCTCCTAGTTCCAAAGGAGATGTACTCCGG
GCTTGTTACACGACCTACCGTGTAAGTCGTAGTCTAGTAGGCTACCTGACGAGTCCTTTTTAGGACGAA
+
FFFFFFFFFFFFFFFFFFFFFFFFFFFFFFFFFFFFFFFFFFFFFFFFFFFFFFFFFFFFFFFFFFFFFFF
FF:FFFFFFFFFFFFFFFFFFFFFFFFFFFFFFFFFFFFFFFFFFFFFFFFFFFFFFFFFFFFFFFFFFFFFFF::FFFFFFFFFFFFF
@A00155:342:HHGFNDSXY:1:2328:24560:34632 1:N:0:GAACCTAG+TCCGCATA
GGCCCACAGCCTTACAGCTGTGGTGACGGTATCCTCTGCCGAAACAGAGGTTGGACAAGACCGGAGG
GGTCTCCTAGTTCCAAAGGAGATGTACTCCGGGCTTGTTACACGACCTACCGTGTAAGTCGTAGTCTAG
+

```

FFFFFFFFFFFFFFFFFFFFFFFFFFFFFFFFFFFFFFFFFFFFFFFFFFFFFFFFFFFFFFFFFFFFFFFF  
FFFFFFFFFFFFFFFFFFFFFFFFFFFFFFFFFFFFFFFFFFFFFFFFFFFFFFFFFFFFFFFFFFFFFFFF  
@A00155:342:HHGFNDSXY:1:2329:13675:6887 1:N:0:GAACCTAG+TCCGCATA  
ACCTCTGTTTCGGCAGAGGATACCGTGCTCCACAGCTGTAAGGCTGTGGGCCCCGAGAGAAGTCGCTCT  
CTCTCGCCCTTCACATCCCTCTCGGCATTGAGATGACCATAGGCCAGAGGTGAGTCCTTAAGTGGACA  
+  
FFFFFFFFFFFFFFFFFFFFFFFFFFFFFFFFFFFFFFFFFFFFFFFFFFFFFFFFFFFFFFFFFFFFFFFF  
FFFFFFFFFFFFFFFFFFFFFFFFFFFFFFFFFFFFFFFFFFFFFFFFFFFFFFFFFFFFFFFFFFFFFFFF:  
@A00155:342:HHGFNDSXY:1:2329:5972:18443 1:N:0:GAACCTAG+TCCGCATA  
ATCTCAATGCCGAGAGGGATGTGGAGGGCGAGAGAGAGCGACTTCTCTCGGGCCCCACAGCCTTACAGC  
TGTGGAGCACGGTATCCTCTGCCGAAACAGAGGTTGGACAAGACCGGAGGGGTCTCCTAGTTCCAAAG  
+  
FFFFFFFFFFFFFFFFFFFFFFFFFFFFFFFFFFFFFFFFFFFFFFFFFFFFFFFFFFFFFFFFFFFFFFFF  
FFFFFFFFFFFFFFFFFFFFFFFFFFFFFFFFFFFFFFFFFFFFFFFFFFFFFFFFFFFFFFFFFFFFFFFF:  
@A00155:342:HHGFNDSXY:1:2329:25825:32816 1:N:0:GAACCTAG+TCCGCATA  
ATCTCAATGCCGAGAGGGATGTGGAGGGCGAGAGAGAGCGACTTCTCTCGGGCCCCACAGCCTTACAGC  
TGTGGAGCACGGTATCCTCTGCCGAAACAGAGGTTGGACAAGACCGGAGGGGTCTCCTAGTTCCAAAG  
+  
FFFFFFFFF:F::F:FFFF::FFFFFF:FFFFFFFFFFFF:FFFFFFFFFF,FF:FF:FFFFFFFFF::  
FF:FFFFFFFFF::FFFFFFFFFFFFFFFFFFFF:FFFFFFFFF,FF:::FFFFFFFFF:FFFFFFFFFFFF  
@A00155:342:HHGFNDSXY:1:2330:25690:12414 1:N:0:GAACCTAG+TCCGCATA  
CCCACAGCCTTACAGCTGTGGAGCACGGTATCCTCTGCCGAAACAGAGGTTGGACAAGACCGGAGGGG  
TCTCCTAGTTCCAAAGGAGATGTACTCCGGGCTTGTTACGACCTACCGTGTAAGTCGTAGTCTAGTA  
+  
FFFFFFFFFFFFFFFFFFFFFFFFFFFFFFFFFFFFFFFFFFFFFFFFFFFFFFFFFFFFFFFFFFFFFFFF  
FFFFFFFFFFFFFFFFFFFFFFFFFFFFFFFFFFFFFFFFFFFFFFFFFFFFFFFFFFFFFFFFFFFFFFFF  
@A00155:342:HHGFNDSXY:1:2330:25753:21981 1:N:0:GAACCTAG+TCCGCATA  
GAGAGCGACTTCTCTCGGGCCCCACAGCCTTACAGCTGTGGAGCACGGTATCCTCTGCCGAAACAGAGG  
TTGGACAAGACCGGAGGGGTCTCCTAGTTCCAAAGGAGATGTACTCCGGGCTTGTTACGAC  
+  
FFFFFFFFFFFFFFFFFFFF:FFFFFFFFFFFFFFFFFFFFFFFFFFFFFFFFFFFFFFFFFFFFFFFFFFFF  
FFFFFFFFFFFFFFFFFFFFFFFFFFFFFFFFFFFFFFFFFFFFFFFFFFFFFFFFFFFFFFFFFFFFFFFF  
@A00155:342:HHGFNDSXY:1:2330:27434:25520 1:N:0:GAACCTAG+TCCGCATA  
GAGAGCGACTTCTCTCGGGCCCCACAGCCTTACAGCTGTGGAGCACGGTATCCTCTGCCGAAACAGAGG  
TTGGACAAGACCGGAGGGGTCTCCTAGTTCCAAAGGAGATGTACTCCGGGCTTGTTACGAC  
+  
FFFFFFFFFFFFFFFFFFFFFFFFFFFFFFFFFFFFFFFFFFFFFFFFFFFFFFFFFFFFFFFFFFFFFFFF  
FFFFFFFFFFFFFFFFFFFFFFFFFFFFFFFFFFFFFFFFFFFFFFFFFFFFFFFFFFFFFFFFFFFFFFFF  
@A00155:342:HHGFNDSXY:1:2330:11171:26882 1:N:0:GAACCTAG+TCCGCATA  
AGGGATGTGGAGGGCGAGAGAGAGCGACTTCTCTCGGGCCCCACAGCCTTACAGCTGTGGAGCACGGTA  
TCCTCTGCCGAAACAGAGGTTGGACAAGACCGGAGGGGTCTCCTAGTTCCAAAGGAGATGTACT  
+  
FFF:F:FFFFFFFFFFFFFFFFFFFF:FFFFFFFFFFFFFFFFFFFF:FFFFFFFFFFFFFFFFFFFFF  
FFFFFFFFFFFFFFFFFFFFFFFFFFFFFFFFFFFFFFFFFFFFFFFFFFFFFFFFFFFFFFFFFFFFFFFF  
@A00155:342:HHGFNDSXY:1:2330:20121:27101 1:N:0:GAACCTAG+TCCGCATA  
CTCTATGCCGAGAGGGATGTGGAGGGCGAGAGAGAGCGACTTCTCTCGGGCCCCACAGCCTTACAGCTG  
TGGAGCACGGTATCCTCTGCCGAAACAGAGGTTGGACAAGACCGGAGGGGTCTCCTAGTTCCAAAGGA  
+  
FFFFFFFFFFFFFFFFFFFF:FFFFFFFFFFFFFFFFFFFFFFFFFFFFFFFFFFFFFFFFFFFFFFFFFFFF  
FFFFFFFFFFFFFFFFFFFFFFFFFFFFFFFFFFFFFFFFFFFFFFFFFFFFFFFFFFFFFFFFFFFFFFFF  
@A00155:342:HHGFNDSXY:1:2330:20374:27195 1:N:0:GAACCTAG+TCCGCATA  
CTCTATGCCGAGAGGGATGTGGAGGGCGAGAGAGAGCGACTTCTCTCGGGCCCCACAGCCTTACAGCTG  
TGGAGCACGGTATCCTCTGCCGAAACAGAGGTTGGACAAGACCGGAGGGGTCTCCTAGTTCCAAAGGA  
+

FFFFFFFF:FFF:,F:FFF:FFFFFFFFFFFFFFFF: F:FFFF:FFFFFFFFFFFFFFFFFFFFFFFF:FF  
FFFFFFFFFFFF:FFFFFFFFFFFF:FFFFFFFFFFFF:FFFFFFFFFFFF:FFFFFFFFFFFF:FFFFFFFF  
@A00155:342:HHGFNDSXY:1:2330:30635:27618 1:N:0:GAACCTAG+TCCGCATA  
GAGCGACTTCTCTCGGGCCCCACAGCCTTACAGCTGTGGAGCACGGTATCCTCTGCCGAAACAGAGGTT  
GGACAAGACCGGAGGGGTCTCCTAGTTCCAAAGGAGATGTACTCCGGGCTTGTTACGACCTACCGTG  
+  
:FFF:F::F:FFFFFF,FFFFFFFFFFFFFFFFFFFFFFFF:FFFF:FFFF:FFF,FF,F:FFFF::F:  
:FFFF,FF,,FFF:FFFFFFFFFFFFFFFF:FFFF:FFFF,FFFF,F::F:,FFFFFFFF,FFFFFF:,F  
@A00155:342:HHGFNDSXY:1:2330:23647:27665 1:N:0:GAACCTAG+TCCGCATA  
GAGCGACTTCTCTCGGGCCCCACAGCCTTACAGCTGTGGAGCACGGTATCCTCTGCCGAAACAGAGGTT  
GGACAAGACCGGAGGGGTCTCCTAGTTCCAAAGGAGATGTACTCCGGGCTTGTTACGACCTACCGTG  
+  
FFFFFFFFFFFFFFFFFFFFFFFFFFFFFFFFFFFFFFFF:FFFFFFFFFFFFFFFFFFFFFFFF  
FFFFFFFFFFFFFFFFFFFFFFFFFFFFFFFFFFFFFFFF:FFF:FFFFFFFFFFFFFFFFFFFFFFFF  
@A00155:342:HHGFNDSXY:1:2330:26268:30921 1:N:0:GAACCTAG+TCCGCATA  
GAGAGGGATGTGGAGGGCGAGAGAGAGCGACTTCTCTCGGGCCCCACAGCCTTACAGCTGTGGAGCACG  
GTATCCTCTGCCGAAACAGAGGTTGGACAAGACCGGAGGGGTCTCCTAGTTCCAAAGGAG  
+  
FFFFFFFFFFFFFFFFFFFFFFFFFFFFFFFFFFFFFFFFFFFFFFFFFFFFFFFFFFFFFFFFFFFFFFFF  
FFFFFFFFFFFFFFFFFFFFFFFFFFFFFFFFFFFFFFFFFFFFFFFFFFFFFFFFFFFFFFFFFFFFFFFF  
@A00155:342:HHGFNDSXY:1:2330:23574:31454 1:N:0:GAACCTAG+TCCGCATA  
GAGAGGGATGTGGAGGGCGAGAGAGAGCGACTTCTCTCGGGCCCCACAGCCTTACAGCTGTGGAGCACG  
GTATCCTCTGCCGAAACAGAGGTTGGACAAGACCGGAGGGGTCTCCTAGTTCCAAAGGAG  
+  
FFFFFFFFFFFFFFFFFFFFFFFFFFFFFFFFFFFFFFFFFFFFFFFFFFFFFFFFFFFFFFFFFFFFFFFF  
FFFFFFFFFFFFFFFFFFFFFFFFFFFFFFFFFFFFFFFFFFFFFFFF:FFFFFFFFFFFFFF,FFF:F  
@A00155:342:HHGFNDSXY:1:2331:6542:27445 1:N:0:GAACCTAG+TCCGCATA  
CCCACCACACCGCCTTAGATCAGCTGTGTCCACTTAAGGACTCACCTCTGGCCTATGGTCATCTCAAT  
GCCGAGAGGGATGTGGAGGGCGAGAGAGAGCGACTTCTCTCGGGCCCCACAGCCTTACAGCTGTGGAGC  
+  
FFFFFFFFFFFFFFFFFFFFFFFF:FFFFFFFFFFFFFFFFFFFFFFFFFFFFFFFFFFFFFFFFFFFFFFFF  
FFFFFFFFFFFFFFFFFFFFFFFFFFFFFFFFFFFFFFFFFFFFFFFFFFFFFFFFFFFFFFFFFFFFFFFF  
@A00155:342:HHGFNDSXY:1:2332:7708:12618 1:N:0:GAACCTAG+TCCGCATA  
AGAGAGAGCGACTTCTCTCGGGCCCCACAGCCTTACAGCTGTGGAGCACGGTATCCTCTGCCGAAACAG  
AGGTTGGACAAGACCGGAGGGGTCTCCTGGTTCCAAAGGAGATGTACTCCGGGCTTGTTACGACCTA  
+  
FFFFFFFFFFFFFFFFFFFFFFFFFFFFFFFFFFFFFFFFFFFFFFFFFFFFFFFFFFFFFFFFFFFFFFFF  
FFFFFFFFFFFFFFFFFFFFFFFFFFFFFFFFFFFFFFFFFFFFFFFFFFFFFFFFFFFFFFFFFFFFFFFF:FFF:  
@A00155:342:HHGFNDSXY:1:2332:28429:19038 1:N:0:GAACCTAG+TCCGCATA  
CCTCTGGCCTATGGTCATCTCAATGCCGAGAGGGATGTGGAGGGCGAGAGAGAGCGACTTCTCTCGGG  
CCCACAGCCTTACAGCTGTGGAGCACGGTATCCTCTGCCGAAACAGAGGTTGGACAAGAC  
+  
FFFFFFFFFFFFFFFFFFFFFFFF,FFFF:F:FFFFFFFF:F,FFFF:FFFFFFFFFFFFFFFFFFFFFFFF  
FFFFFFFFFFFF:FFFFFFFFFFFFFFFFFFFFFFFF:FFFFFFFFFFFFFFFFFFFFFFFF:FFFFFFFF  
@A00155:342:HHGFNDSXY:1:2332:15637:34021 1:N:0:GAACCTAG+TCCGCATA  
ACTTCTCTCGGGCCCCACAGCCTTACAGCTGTGGAGCACGGTATCCTCTGCCGAAACAGAGGTTGGACA  
AGACCGGAGGGGTCTCCTAGTTCCAAAGGAGATGTACTCCGGGCTTGTTACGACCTACCGTGTAAGT  
+  
FFFFFFFFFFFFFFFFFFFFFFFFFFFFFFFFFFFFFFFFFFFFFFFFFFFFFFFFFFFFFFFFFFFFFFFF  
FFFFFFFFFFFFFFFFFFFFFFFFFFFFFFFFFFFFFFFFFFFFFFFFFFFFFFFFFFFFFFFFFFFFFFFF  
@A00155:342:HHGFNDSXY:1:2332:15456:34053 1:N:0:GAACCTAG+TCCGCATA  
ACTTCTCTCGGGCCCCACAGCCTTACAGCTGTGGAGCACGGTATCCTCTGCCGAAACAGAGGTTGGACA  
AGACCGGAGGGGTCTCCTAGTTCCAAAGGAGATGTACTCCGGGCTTGTTACGACCTACCGTGTAAGT  
+

```

FFFFFFFFFFFFFFFFFFFFFFFFFFFFFFFFFFFFFFFFFFFFFFFFFFFFFFFFFFFFFFFFFFFFFFFFF:FFFFFFFFFFFFFFFFFFFFFFFFFFFFFFFFFFFFFFFFF
FFFFFFFFFFFFFFFFFFFFFFFFFFFFFFFFFFFFFFFFFFFFFFFFFFFFFFFFFFFFFFFFFFFFFFFFF:FFFFFFFF
@A00155:342:HHGFNDSXY:1:2333:1136:10817 1:N:0:GAACCTAG+TCCGCATA
CAATGCCGAGAGGGATGTAGAGGGCGAGAGAGAGCGACTTCTCTCGGGCCCACAGCCTTACAGCTGTG
GAGCACGGTATCCTCTGCCGAAACAGAGGTTGGACAAGACCGGAGGGGTCTCCTAGTTCAAAGGAG
+
FF:FFFFF:F:FFFFFFFF::FFFF,FF,FFF,FFF:FFFFFFFF:FFF:F,:FFF:FFFF,FFFFFF
F,F,FFF:FFFFFFFF:FF:,F:FF:FFFFFFFF:FF:FFFFFFFF,FFFF:FFFFFFFF,: ,FF:F
@A00155:342:HHGFNDSXY:1:2333:6008:11804 1:N:0:GAACCTAG+TCCGCATA
GGATGTGGAGGGCGAGAGAGAGCGACTTCTCTCGGGCCCACAGCCTTACAGCTGTGGAGCACGGTATC
CTCTGCCGAAACAGAGGTTGGACAAGACCGGAGGGGTCTCCTAGTTCAAAGGAGATGTACTCC
+
FFFFF:FFFFFFFFFFFFFFFFFFFFFFFFFFFFFFFFFFFFFFFFFFFFFFFFFFFFFFFFFFFFFFFFF
FFFFFFFFFFFFFFFFFFFFFFFFFFFFFFFFFFFFFFFFFFFFFFFFFFFFFFFFFFFFFFFFFFFFFFFF:
@A00155:342:HHGFNDSXY:1:2333:12961:12571 1:N:0:GAACCTAG+TCCGCATA
GGATGTAGAGGGCGAGAGAGAGCGACTTCTCTCGGGCCCACAGCCTTACAGCTGTGGAGCACGGTATC
CTCTGCCGAAACAGAGGTTGGACAAGACCGGAGGGGTCTCCTAGTTCAAAGGAGATGTACTCCGGGC
+
FFFFFFFFFFFFFFFFFFFFFFFFFFFFFFFFFFFFFFFFFFFFFFFFFFFFFFFFFFFFFFFFFFFFFFFFF
FFFFFFFFFFFFFFFFFFFFFFFFFFFFFFFFFFFFFFFFFFFFFFFFFFFFFFFFFFFFFFFFFFFFFFFF:FFF
@A00155:342:HHGFNDSXY:1:2333:21097:35712 1:N:0:GAACCTAG+TCCGCATA
GGATGTGGAGGGCGAGAGAGAGCGACTTCTCTCGGGCCCACAGCCTTACAGCTGTGGAGCACGGTATC
CTCTGCCGAAACAGAGGTTGGACAAGACCGGAGGGGTCTCCTAGTTCAAAGGAGATGTACTCC
+
FFFFFFFFFFFFFFFFFFFFFFFFFFFFFFFFFFFFFFFFFFFFFFFFFFFFFFFFFFFFFFFFFFFFFFFFF
FFFFFFFFFFFFFFFFFFFFFFFFFFFFFFFFFFFFFFFFFFFFFFFFFFFFFFFFFFFFFFFFFFFFFFFFF
@A00155:342:HHGFNDSXY:1:2334:25129:13072 1:N:0:GAACCTAG+TCCGCATA
TGTCCTTAAGGACTCACCTCTGGCCTATGGTCATCTCAATGCCGAGAGGGATGTGGAGGGCGAGAG
AGAGCGACTTCTCTCGGGCCCACAGCCTTACAGCTGTGGAGCACGGTATCCTCTGCCGAAACAGAGGT
+
FFFFFFFFFFFFFFFFFFFFFFFFFFFFFFFFFFFFFFFFFFFFFFFFFFFFFFFFFFFFFFFFFFFFFFFFF
FFFFFFFFFFFFFFFFFFFFFFFFFFFFFFFFFFFFFFFFFFFFFFFFFFFFFFFFFFFFFFFFFFFFFFFFF
@A00155:342:HHGFNDSXY:1:2334:11180:15530 1:N:0:GAACCTAG+TCCGCATA
AGAGAGAGCGACTTCTCTCGGGCCCACAGCCTTACAGCTGTGGAGCACGGTATCCTCTGCCGAAACAG
AGGTTGGACAAGACCGGAGGGGTCTCCTAGTTCAAAGGAGATGTACTCCGGGCTTGTTACGACCTA
+
FFFFFFFFFFFFFFFFFFFFFFFFFFFFFFFFFFFFFFFFFFFFFFFFFFFFFFFFFFFFFFFFFFFFFFFFF
FFFFFFFFFFFFFFFFFFFFFFFFFFFFFFFFFFFFFFFFFFFFFFFFFFFFFFFFFFFFFFFFFFFFFFFF:
@A00155:342:HHGFNDSXY:1:2334:24406:18677 1:N:0:GAACCTAG+TCCGCATA
CTTCTCTCGGGCCCACAGCCTTACAGCTGTGGAGCACGGTATCCTCTGCCGAAACAGAGGTTGGACAA
GACCGGAGGGGTCTCCTAGTTCAAAGGAGATGTACTCCGGGCTTGTTACGACCTACCGTGTAAGTC
+
FFFFFFFFFFFFFFFFFFFFFFFFFFFFFFFFFFFFFFFFFFFFFFFFFFFFFFFFFFFFFFFFFFFFFFFFF
FFFFFFFFFFFFFFFFFFFFFFFFFFFFFFFFFFFFFFFFFFFFFFFFFFFFFFFFFFFFFFFFFFFFFFFFF
@A00155:342:HHGFNDSXY:1:2334:21269:28369 1:N:0:GAACCTAG+TCCGCATA
CTTCTCTCGGGCCCACAGCCTTACAGCTGTGGAGCACGGTATCCTCTGCCGAAACAGAGGTTGGACAA
GACCGGAGGGGTCTCCTAGTTCAAAGGAGATGTACTCCGGGCTTGTTACGACCTACCGTGTAAGTC
+
FFFFFFFFFFFFFFFFFFFFFFFFFFFFFFFFFFFFFFFFFFFFFFFFFFFFFFFFFFFFFFFFFFFFFFFFF
FFFFFFFFFFFFFFFFFFFFFFFFFFFFFFFFFFFFFFFFFFFFFFFFFFFFFFFFFFFFFFFFFFFFFFFFF
@A00155:342:HHGFNDSXY:1:2334:8630:29778 1:N:0:GAACCTAG+TCCGCATA
GATCAGCTGTGTCCAATTAAGGACTCACCTCTGGCCTATGGTCATCTCAATGCCGAGAGGGATGTGGA
GGGCGAGAGAGAGCGACTTCTCTCGGGCCCACAGCCTTACAGCTGTGGAGCACGGTATCCTCTGCCGA
+

```

FFFFFFFFFFFFFFFFFFFFFFFFFFFFFFFFFFFFFFFFFFFFFFFFFFFFFFFFFFFFFFFFFFFFFFFF  
FFFFFFFFFFFFFFFFFFFFFFFFFFFFFFFFFFFFFFFFFFFFFFFFFFFFFFFFFFFFFFFFFFFFFFFF  
@A00155:342:HHGFNDSXY:1:2334:20907:36448 1:N:0:GAACCTAG+TCCGCATA  
GGATGTGGAGGGCGAGAGAGAGCGACTTCTCTCGGGCCCACAGCCTTACAGCTGTGGAGCACGGTATC  
CTCTGCCGAAACAGAGGTTGGACAAGACCGGAGGGGTCTCCTAGTTCCAAAGGAGATG  
+  
FFFFFFFFFFFFFFFFFFFFFFFFFFFFFFFFFFFFFFFFFFFFFFFFFFFFFFFFFFFFFFFFFFFF::FFFFFFFFFFFF:FF  
FFFFFFFFFFFFFFFFFFFFFFFFFFFFFFFFFFFFFFFFFFFFFFFFFFFFFFFFFFFFFFFFFFFF:FF  
@A00155:342:HHGFNDSXY:1:2335:9498:19695 1:N:0:GAACCTAG+TCCGCATA  
GAGGGCGAGAGAGAGCGACTTCTCTCGGGCCCACAGCCTTACAGCTGTGGAGCACGGTATCCTCTGCC  
GAAACAGAGGTTGGACAAGACCGGAGGGGTCTCCTAGTTCCAAAGGAGATGTACTCCGGGCTTGTTCA  
+  
FFFFFFFFFFFFFFFFFFFFFFFFFFFFFFFFFFFFFFFFFFFFFFFFFFFFFFFFFFFFFFFFFFFF:FFFFFFFFFFFF  
FFFFFFFFFFFFFFFFFFFFFFFFFFFFFFFFFFFFFFFFFFFFFFFFFFFFFFFFFFFFFFFFFFFF:FFFFFFFFFFFF:FFFFFFFFFFFF  
@A00155:342:HHGFNDSXY:1:2335:31801:29919 1:N:0:GAACCTAG+TCCGCATA  
CTTCTCTCGGGCCCACAGCCTTACAGCTGTGGAGCACGGTATCCTCTGCCGAAACAGAGGTTGGACAA  
GACCGGAGGGGTCTCCTAGTTCCAAAGGAGATGTACTCCGGGCTTGTTACGACCTACCGTGTAAGTC  
+  
FF,FFFFFFFFFFFFFFFFFFFFFFFFFFFFFFFFFFFFFFFFFFFFFFFFFFFFFFFFFFFFFFFFFFFF  
FFFFFFFFFFFFFFFFFFFFFFFFFFFFFFFFFFFFFFFFFFFFFFFFFFFFFFFFFFFFFFFFFFFF  
@A00155:342:HHGFNDSXY:1:2335:8142:34820 1:N:0:GAACCTAG+TCCGCATA  
CTCTGCCGAAACAGAGGTTGGACAAGACCGGAGGGGTCTCCTAGTTCCAAAGGAGATGTACTCCGGGC  
TTGTTACGACCTACCGTGTAAGTCGTAGTCTAGTAGGCTACCTGACGAGTCCTTTTAGGACGAAAC  
+  
FFFFFFFFFFFFFFFFFFFFFFFFFFFFFFFFFFFFFFFFFFFFFFFFFFFFFFFFFFFFFFFFFFFF  
FFFFFFFFFFFFFFFFFFFFFFFFFFFFFFFFFFFFFFFFFFFFFFFFFFFFFFFFFFFFFFFFFFFF  
@A00155:342:HHGFNDSXY:1:2335:6343:35900 1:N:0:GAACCTAG+TCCGCATA  
GAGAGCGACTTCTCTCGGGCCCACAGCCTTACAGCTGTGGAGCACGGTATCCTCTGCCGAAACAGAGG  
TTGGACAAGACCGGAGGGGTCTCCTAGTTCCAAAGGAGATGTACTCCGGGCTTGTTACAG  
+  
FFFFFFFFFFFFFFFFFFFF:FFFFFFFFFFFFF::FFFFFFFFFFFFFFFFFFFF:FFFFFFFF:FFFFFFFFFFFFF  
,:FFFFFFFFFFFFFFFFFFFFFFFFFFFFFFFFFFFFFFFFFFFFFFFFFFFF:FFFFFFFFFFFF:FFFFF  
@A00155:342:HHGFNDSXY:1:2336:26865:12477 1:N:0:GAACCTAG+TCCGCATA  
ACTTCTCTCGGGCCCACAGCCTTACAGCTGTGGAGCACGGTATCCTCTGCCGAAACAGAGGTTGGACA  
AGACCGGAGGGGTCTCCTAGTTCCAAAGGAGATGTACTCCGGGCTTGTTACGACCTACCGTGTAAGT  
+  
FFFFFFFFFFFFFFFFFFFFFFFFFFFFFFFFFFFFFFFFFFFFFFFFFFFFFFFFFFFFFFFFFFFF  
FFFFFFFFFFFFFFFFFFFFFFFFFFFFFFFFFFFFFFFFFFFFFFFFFFFFFFFFFFFFFFFFFFFF:FFFFFFFFFFFF  
@A00155:342:HHGFNDSXY:1:2336:19063:16814 1:N:0:GAACCTAG+TCCGCATA  
GTCATCTCAATGCCGAGAGGGATGTGGAGGGCGAGAGAGAGCGACTTCTCTCGGGCCCACAGCCTTAC  
AGCTGTGGAGCACGGTATCCTCTGCCGAAACAGAGGTTGGACAAGACCGGAGGGGTCTCCTAGTTCCA  
+  
FFFFFFFFFFFFFFFFFFFFFFFFFFFFFFFFFFFFFFFFFFFFFFFFFFFFFFFFFFFFFFFFFFFF  
FFFFFFFFFFFFFFFFFFFFFFFFFFFFFFFFFFFFFFFFFFFFFFFFFFFFFFFFFFFFFFFFFFFF  
@A00155:342:HHGFNDSXY:1:2336:12563:24784 1:N:0:GAACCTAG+TCCGCATA  
TTCTCTCGGGCCCACAGCCTTACAGCTGTGGAGCACGGTATCCTCTGCCGAAACAGAGGTTGGACAAG  
ACCGGAGGGGTCTCCTAGTTCCAAAGGAGATGTACTCCGGGCTTGTTACGACCTACCGTGTAAGTCG  
+  
FFFFFFFFFFFFFFFFFFFFFFFFFFFF::FFFFF:FFFFF:FFFFFFFFFFFF:FFFFFFFFFFFFFFFFFFFFF:  
FFFFFFFFFFFFFFFFFFFFFFFFFFFFFFFFFFFFFFFFFFFF:FFFFFFFFFFFFFFFFFFFFF,FFFFFFFFFFFF  
@A00155:342:HHGFNDSXY:1:2337:14181:14434 1:N:0:GAACCTAG+TCCGCATA  
AGACTCACCTCTGGCCTATGGTCATCTCAATGCCGAGAGGGATGTGGAGGGCGAGAGAGAGCGACTTC  
TCTCGGGCCCACAGCCTTACAGCTGTGGAGCACGGTATCCTCTGCCGAAACAGAGGTTGGACAA  
+

FFFFFFFFFFFFFFFFFFFFFFFFFFFFFFFFFFFFFFFFFFFFFFFFFFFFFFFFFFFFFFFFFFFFFFFF  
FFFFFFFFFFFFFFFFFFFFFFFFFFFFFFFFFFFFFFFFFFFFFFFFFFFFFFFFFFFFFFFFFFFFFFFF  
@A00155:342:HHGFNDSXY:1:2337:27245:18490 1:N:0:GAACCTAG+TCCGCATA  
TATCCTCTGCCGAAACAGAGGTTGGACAAGACCGGAGGGGTCTCCTAGTTCCAAAGGAGATGTACTCC  
GGGCTTGTTACGACCTACCGTGTAAGTCGTAGTCTAGTAGGCTACCTGACGAGTCCTTTTATAGGACG  
+  
FFFFFFFFFFFFFFFFFFFFFFFFFFFFFFFFFFFFFFFFFFFFFFFFFFFFFFFFFFFFFFFFFFFFFFFF  
FFFFFFFFFFFFFFFFFFFFFFFFFFFFFFFFFFFFFFFFFFFFFFFFFFFFFFFFFFFFFFFFFFFFFFFF  
@A00155:342:HHGFNDSXY:1:2337:10619:29246 1:N:0:GAACCTAG+TCCGCATA  
TCCTCTGCCGAAACAGAGGTTGGACAAGACCGGAGGGGTCTCCTAGTTCCAAAGGAGATGTACTCCGG  
GCTTGTTACGACCTACCGTGTAAGTCGTAGTCTAATAGGCTACCTGACGAGTCCTTTTATAGGACGAA  
+  
FFFFFFFFFFFFFFFFFFFFFFFFFFFFFFFFFFFFFFFFFFFFFFFFFFFFFFFFFFFFFFFFFFFFFFFF  
FF:FFFFFFFFFFFFFFFFFFFFFFFFFFFFFFFFFFFFFFFFFFFFFFFFFFFFFFFFFFFFFFFFFFFF  
@A00155:342:HHGFNDSXY:1:2337:12717:29246 1:N:0:GAACCTAG+TCCGCATA  
CATCTCAATGCCGAGAGGGATGTGGAGGGCGAGAGAGAGCGACTTCTCTCGGGCCACAGCCTTACAG  
CTGTGGAGCACGGTATCCTCTGCCGAAACAGAGGTTGGACAAGACCGGAGGGGTCTCCTGGTTCCAAA  
+  
FFFFFFFFFFFFFFFFFFFFFFFFFFFFFFFFFFFFFFFFFFFFFFFFFFFFFFFFFFFFFFFFFFFFFFFF  
FFFFFFFFFFFFFFFFFFFFFFFFFFFFFFFFFFFFFFFFFFFFFFFFFFFFFFFFFFFFFFFFFFFFFFFF  
@A00155:342:HHGFNDSXY:1:2337:6045:30248 1:N:0:GAACCTAG+TCCGCATA  
TGCCCCGCCACACCGCCTTAGATCAGCTGTGTCCACTTAAGGACTCACCTCTGGCCTATGGTCATCTC  
AATGCCGAGAGGGATGTGGAGGGCGAGAGAGAGCGACTTCTCTCGGGCCACAGCCTTACAGCTGTGG  
+  
FFFFFFFFFFFFFFFFFFFFFFFFFFFFFFFFFFFFFFFFFFFFFFFFFFFFFFFFFFFFFFFFFFFFFFFF  
FFFFFFFFFFFFFFFFFFFFFFFFFFFFFFFFFFFFFFFFFFFFFFFFFFFFFFFFFFFFFFFFFFFFFFFF  
@A00155:342:HHGFNDSXY:1:2337:23556:36526 1:N:0:GAACCTAG+TCCGCATA  
GCGAGAGAGAGCGACTTCTCTCGGGCCACAGCCTTACAGCTGTGGAGCACGGTATCCTCTGCCGAAA  
CAGAGGTTGGACAAGACCGGAGGGGTCTCCTAGTTCCAAAGGAGATGTACTCCGGGCTTGTTACGAC  
+  
FFFFFFFFFFFFFFFFFFFFFFFFFFFFFFFFFFFFFFFFFFFFFFFFFFFFFFFFFFFFFFFFFFFFFFFF  
FFFFFFFFFFFFFFFFFFFFFFFFFFFFFFFFFFFFFFFFFFFFFFFFFFFFFFFFFFFFFFFFFFFFFFFF  
@A00155:342:HHGFNDSXY:1:2338:21133:3771 1:N:0:GAACCTAG+TCCGCATA  
AGGGATGTGGAGGGCGAGAGAGAGCGACTTCTCTCGGGCCACAGCCTTACAGCTGTGGAGCACGGTA  
TCCTCTGCCGAAACAGAGGTTGGACAAGACCGGAGGGGTCTCCTAGTTCCAAAGGAGATGTACTCCGG  
+  
FFFFFFFFFFFFFFFFFFFFFFFFFFFFFFFFFFFFFFFFFFFFFFFFFFFFFFFFFFFFFFFFFFFFFFFF  
FFFFFFFFFFFFFFFFFFFFFFFFFFFFFFFFFFFFFFFFFFFFFFFFFFFFFFFFFFFFFFFFFFFFFFFF  
@A00155:342:HHGFNDSXY:1:2338:27236:5478 1:N:0:GAACCTAG+TCCGCATA  
AGAGAGAGCGACTTCTCTCGGGCCACAGCCTTACAGCTGTGGAGCACGGTATCCTCTGCCGAAACAG  
AGGTTGGACAAGACCGGAGGGGTCTCCTAGTTCCAAAGGAGATGTACTCCGGGCTTGTTACGACCTA  
+  
FFFFFFFFFFFFFFFFFFFFFFFFFFFFFFFFFFFFFFFFFFFFFFFFFFFFFFFFFFFFFFFFFFFFFFFF  
FFFFFFFFFFFFFFFFFFFFFFFFFFFFFFFFFFFFFFFFFFFFFFFFFFFFFFFFFFFFFFFFFFFFFFFF  
@A00155:342:HHGFNDSXY:1:2338:30553:11882 1:N:0:GAACCTAG+TCCGCATA  
AGCGACTTCTCTCGGGCCACAGCCTTACAGCTGTGGAGCACGGTATCCTCTGCCGAAACAGAGGTTG  
GACAAGACCGGAGGGGTCTCCTAGTTCCAAAGGAGATGTACTCCGGGCTTGTTACGACCTACCGTGT  
+  
FFFFFFFFFFFFFFFFFFFFFFFFFFFFFFFFFFFFFFFFFFFFFFFFFFFFFFFFFFFFFFFFFFFFFFFF  
FFFFF,FFFFFFFFFFFFFFFFFFFFFFFFFFFFFFFFFFFFFFFFFFFFFFFFFFFFFFFFFFFFFFFF  
@A00155:342:HHGFNDSXY:1:2338:22896:12587 1:N:0:GAACCTAG+TCCGCATA  
TGCCGAGAGGGATGTGGAGGGCGAGAGAGAGCGACTTCTCTCGGGCCACAGCCTTACAGCTGTGGAG  
CACGGTATCCTCTGCCGAAACAGAGGTTGGACAAGACCGGAGGGGTCTCCTAGTTCCAAAGGAGATGT

FFFFFFFFFFFFFFFFFFFFFFFFFFFFFFFFFFFFFFFFFFFFFFFFFFFFFFFFFFFFFFFFFFFFF  
@A00155:342:HHGFNDSXY:1:2338:21097:13416 1:N:0:GAACCTAG+TCCGCATA  
AGAGAGAGCGACTTCTCTCGGGCCCACAGCCTTACAGCTGTGGAGCACGGTATCCTCTGCCGAAACAG  
AGGTTGGACAAGACCGGAGGGGTCTCCTGGTTCCAAAGGAGATGTACTCCGGGCTTGTTACACGACCTA  
+  
FFFFFFFFFFFFFFFFFFFFFFFFFFFFFFFFFFFFFFFFFFFFFFFFFFFFFFFFFFFFFFFFFFFF:  
:F:FFFF,FFFFFF:FF:FFFF:FFFF,:FFFF,,FFFFFFFF:F:FFFF,:FFF,:F:,F:FF  
@A00155:342:HHGFNDSXY:1:2338:22562:16016 1:N:0:GAACCTAG+TCCGCATA  
CAGCCTTACAGCTGTGGAGCACGGTATCCTCTGCCGAAACAGAGGTTGGACAAGACCGGAGGGGTCTC  
TAGTTCCAAAGGAGATGTACTCCGGGCTTGTTACACGACCTACCGTGTAAGTCGTAGTCTAGTAGGCT  
+  
FFFFFFFFFFFFFFFFFFFFFFFFFFFFFFFFFFFFFFFFFFFFFFFFFFFFFFFFFFFFFFFFFFFF  
FFFFFFFFFFFFFFFFFFFFFFFFFFFFFFFFFFFFFFFFFFFFFFFFFFFFFFFFFFFFFFFFFFFF:FF:FFFFFFFFFFFFFFFFFFFF  
@A00155:342:HHGFNDSXY:1:2338:20211:17675 1:N:0:GAACCTAG+TCCGCATA  
CACCTCTGGCCTATGGTCATCTCAATGCCGAGAGGGATGTGAAGGGCGAGAGAGAGCGACTTCTCTCG  
GGCCCCACAGCCTTACAGCTGTGGAGCACGGTATCCTCTGCCGAAACAGAGGTTGGACAAGACCGGAGG  
+  
FFFFFFFFFFFFFFFFFFFFFFFFFFFFFFFFFFFFFFFFFFFFFFFFFFFFFFFFFFFFFFFFFFFF:FFFFFFFFFFFFFFFFFFFF  
FFFFFFFFFFFFFFFFFFFFFFFFFFFFFFFFFFFFFFFFFFFFFFFFFFFFFFFFFFFFFFFFFFFF  
@A00155:342:HHGFNDSXY:1:2338:30798:23171 1:N:0:GAACCTAG+TCCGCATA  
AGAGAGAGCGACTTCTCTCGGGCCCACAGCCTTACAGCTGTGGAGCACGGTATCCTCTGCCGAAACAG  
AGGTTGGACAAGACCGGAGGGGTCTCCTAGTTCCAAAGGAGATGTACTCCGGGCTTGTTACACGACCTA  
+  
FFFFFFFFF:FFFFFFFFFFFFFFFFFFFFFFFFFFFFFFFFFFFFFFFFFFFFFFFFFFFFFFFFFFFF:FF  
FFFFFFFFFFFFFFFFFFFFFFFFFFFFFFFFFFFFFFFFFFFFFFFFFFFFFFFFFFFFFFFFFFFF:FFFFFFFFFFFFFFFFFFFF  
@A00155:342:HHGFNDSXY:1:2339:23321:4961 1:N:0:GAACCTAG+TCCGCATA  
TTACAGCTGTGGAGCACGGTATCCTCTGCCGAAACAGAGGTTGGACAAGACCGGAGGGGTCTCCTAGT  
TCCAAAGGAGATGTACTCCGGGCTAGTTCACGACCTACCGTGTAAGTCGTAGTCTAGTAGGCTACCTG  
+  
:FFFFFFFFFFFFFFFFFFFFFFFFFFFFFFFFFFFFFFFFFFFFFFFFFFFFFFFFFFFFFFFFFFFF  
FFFFFFFFFFFFFFFFFFFFFFFFFFFFFFFFFFFFFFFFFFFFFFFFFFFFFFFFFFFFFFFFFFFF  
@A00155:342:HHGFNDSXY:1:2339:22869:19648 1:N:0:GAACCTAG+TCCGCATA  
GAGCGACTTCTCTCGGGCCCACAGCCTTACAGCTGTGGAGCACGGTATCCTCTGCCGAAACAGAGGTT  
GGACAAGACCGGAGGGGTCTCCTAGTTCCAAAGGAGATGTACTCCGGGCTTGTTACGACCTACCGTG  
+  
FFFFFFFFFFFFFFFFFFFFFFFFFFFFFFFFFFFFFFFFFFFFFFFFFFFFFFFFFFFFFFFFFFFF  
FFFFFFFFFFFFFFFFFFFFFFFFFFFFFFFFFFFFFFFFFFFFFFFFFFFFFFFFFFFFFFFFFFFF  
@A00155:342:HHGFNDSXY:1:2339:24614:22357 1:N:0:GAACCTAG+TCCGCATA  
CGAGAGAGAGCGACTTCTCTCGGGCCCACAGCCTTACAGCTGTGGAGCACGGTATCCTCTGCCGAAAC  
AGAGGTTGGACAAGACCGGAGGGGTCTCCTAGTTCCAAAGGAGATGTACTCCGGGCTTGTTACGACC  
+  
FFFFFFFFFFFFFFFFFFFFFFFFFFFFFFFFFFFFFFFFFFFFFFFFFFFFFFFFFFFFFFFFFFFF:FFFFFFFFFFFFFFFFFFFF  
FFFFFFFFFFFFFFFFFFFFFFFFFFFFFFFFFFFFFFFFFFFFFFFFFFFFFFFFFFFFFFFFFFFF:FFFFFFFFFFFFFFFFFFFF  
@A00155:342:HHGFNDSXY:1:2339:9986:22733 1:N:0:GAACCTAG+TCCGCATA  
AGAGAGAGCGACTTCTCTCGGGCCCACAGCCTTACAGCTGTGGAGCACGGTATCCTCTGCCGAAACAG  
AGGTTGGACAAGACCGGAGGGGTCTCCTAGTTCCAAAGGAGATGTACTCCGGGCTTGTTACGACCTA  
+  
FFFFFFFFFFFFFFFFFFFFFFFFFFFFFFFFFFFFFFFFFFFFFFFFFFFFFFFFFFFFFFFFFFFF  
FFFFFFFFFFFFFFFFFFFFFFFFFFFFFFFFFFFFFFFFFFFFFFFFFFFFFFFFFFFFFFFFFFFF:FFFFFFFFFFFFFFFF  
@A00155:342:HHGFNDSXY:1:2339:18249:30342 1:N:0:GAACCTAG+TCCGCATA  
TGTGGAGGGCGAGAGAGAGCGACTTCTCTCGGGCCCACAGCCTTACAGCTGTGGAGCACGGTATCCTC  
TGCCGAAACAGAGGTTGGACAAGACCGGAGGGGTCTCCTGGTTCCAAAGGAGATGTACTCCGGG

+

FFFFFFFFFFFFFFFFFFFFFFFFFFFFFFFFFFFFFFFFFFFFFFFFFFFFFFFFFFFFFFFFFFFFFFFF  
FFFFFFFFFFFFFFFFFFFFFFFFFFFFFFFFFFFFFFFFFFFFFFFFFFFFFFFFFFFFFFFFFFFFFFFF  
@A00155:342:HHGFNDSXY:1:2339:16007:33880 1:N:0:GAACCTAG+TCCGCATA  
AGAGAGAGCGACTTCTCTCGGGCCCACAGCCTTACAGCTGTGGAGCACGGTATCCTCTGCCGAAACAG  
AGGTTGGACAAGACCGGAGGGGTCTCCTAGTTCCAAAGGAGATGTACTCCGGGCTTGTTACGACCTA  
+  
FFFFFFFFFFFFFFFFFFFFFFFFFFFFFFFFFFFFFFFFFFFFFFFFFFFFFFFFFFFFFFFFFFFFFFFF  
FFFFFFFFFFFFFFFFFFFFFFFFFFFFFFFFFFFFFFFFFFFFFFFFFFFFFFFFFFFFFFFFFFFFFFFF  
@A00155:342:HHGFNDSXY:1:2339:7292:35884 1:N:0:GAACCTAG+TCCGCATA  
GGACTCACCTCTGGCCTATGGTCATCTCAATGCCGAGAGGGATGTAGAGGGCGAGAGAGAGCGACTTC  
TCTCGGGCCCACAGCCTTACAGCTGTGGAGCACGGTATCCTCTGCCGAAACAGAGGTTGGACAAGACC  
+  
FFFFFFFFFFFFFFFFFFFFFFFFFFFFFFFFFFFFFFFFFFFFFFFFFFFFFFFFFFFFFFFFFFFFFFFF  
FFFFFFFFFFFFFFFFFFFFFFFFFFFFFFFFFFFFFFFFFFFFFFFFFFFFFFFFFFFFFFFFFFFFFFFF  
@A00155:342:HHGFNDSXY:1:2340:12147:19366 1:N:0:GAACCTAG+TCCGCATA  
GACTTCTCTCGGGCCCACAGCCTTACAGCTGTGGAGCACGGTATCCTCTGCCGAAACAGAGGTTGGAC  
AAGACCGGAGGGGTCTCCTAGTTCCAAAGGAGATGTACTCCGGGCTTGTTACGACCTACCGTGTAAG  
+  
FFFFFFFFFFFFFFFFFFFFFFFFFFFFFFFFFFFFFFFFFFFFFFFFFFFFFFFFFFFFFFFFFFFFFFFF  
FFFFFFFFFFFFFFFFFFFFFFFFFFFFFFFFFFFFFFFFFFFFFFFFFFFFFFFFFFFFFFFFFFFFFFFF  
@A00155:342:HHGFNDSXY:1:2341:32416:1172 1:N:0:GAACCTAG+TCCGCATA  
TTACAGCTGTGGAGCACGGTATCCTCTGCCGAAACAGAGGTTGGACAAGACCGGAGGGGTCTCCTAGT  
TCCAAAGGAGATGTACTCCGGGCTTGTTACGACCTACCGTGTAAGTCGTAGTCTAGTAGGCTACCTG  
+  
,F:FFFF:FFFFFFFFFFFFFFFFFFFFFFFFFFFFFFFFFFFFFFFFFFFFFFFFFFFFFFFFFFFFF  
FFFFFFFFFFFFFFFFFFFFFFFFFFFFFFFFFFFFFFFFFFFFFFFFFFFFFFFFFFFFFFFFFFFFFFFF  
@A00155:342:HHGFNDSXY:1:2341:32262:1313 1:N:0:GAACCTAG+TCCGCATA  
TTACAGCTGTGGAGCACGGTATCCTCTGCCGAAACAGAGGTTGGACAAGACCGGAGGGGTCTCCTAGT  
TCCAAAGGAGATGTACTCCGGGCTTGTTACGACCTACCGTGTAAGTCGTAGTCTAGTAGGCTACCTG  
+  
FFFFFFF,::F::FF:F:FFFFFFFFFFFFF,FFFF,FFF:FFFFFFFFFFFF:FFFFFFFFFFFFF:  
FFFFFFFFF:FF:FFFFFFFFF:FF,,,FFF:F::FFFFFFFFFFFF,FFFF:FFFFF,:FFFFFFFFFFFF  
@A00155:342:HHGFNDSXY:1:2341:22327:2707 1:N:0:GAACCTAG+TCCGCATA  
CTCAATGCCGAGAGGGATGTGGAGGGCGAGAGAGAGCGACTTCTCTCGGGCCCACAGCCTTACAGCTG  
TGGAGCACGGTATCCTCTGCCGAAACAGAGGTTGGACAAGACCGGAGGGGTCTCCTAGTTCCAAAGGA  
+  
FFFFFFFFFFFFFFFFFFFFFFFFFFFFFFFFFFFFFFFFFFFFFFFFFFFFFFFFFFFFFFFFFFFFFFFF  
FFFFFFFFFFFFFFFFFFFFFFFFFFFFFFFFFFFFFFFFFFFFFFFFFFFFFFFFFFFFFFFFFFFFFFFF  
@A00155:342:HHGFNDSXY:1:2341:17870:5134 1:N:0:GAACCTAG+TCCGCATA  
GGGCGAGAGAGAGCGACTTCTCTCGGGCCCACAGCCTTACAGCTGTGGAGCACGGTATCCTCTGCCGA  
AACAGAGGTTGGACAAGACCGGAGGGGTCTCCTAGTTCCAAAGGAGATGTACTCCGGGCTTGTTACG  
+  
FFFFFFFFFFFFFFFFFFFFFFFFFFFFFFFFFFFFFFFFFFFFFFFFFFFFFFFFFFFFFFFFFFFFFFFF  
FFFFFFFFFFFFFFFFFFFFFFFFFFFFFFFFFFFFFFFFFFFFFFFFFFFFFFFFFFFFFFFFFFFFFFFF  
@A00155:342:HHGFNDSXY:1:2341:19153:7701 1:N:0:GAACCTAG+TCCGCATA  
GGGCGAGAGAGAGCGACTTCTCTCGGGCCCACAGCCTTACAGCTGTGGAGCACGGTATCCTCTGCCGA  
AACAGAGGTTGGACAAGACCGGAGGGGTCTCCTAGTTCCAAAGGAGATGTACTCCGGGCTTGTTACG  
+  
FFFFFFFFFFFFFFFFFFFFFFFFFFFFFFFFFFFFFFFFFFFFFFFFFFFFFFFFFFFFFFFFFFFFFFFF  
FFFFFFFFFFFFFFFFFFFFFFFFFFFFFFFFFFFFFFFFFFFFFFFFFFFFFFFFFFFFFFFFFFFFFFFF  
@A00155:342:HHGFNDSXY:1:2341:30409:8907 1:N:0:GAACCTAG+TCCGCATA  
GGGCGAGAGAGAGCGACTTCTCTCGGGCCCACAGCCTTACAGCTGTGGAGCACGGTATCCTCTGCCGA  
AACAGAGGTTGGACAAGACCGGAGGGGTCTCCTAGTTCCAAAGGAGATGTACTCCGGGCTTGTTACG  
+



```
FFFFFFFFFFFFFFFFFFFFFFFFFFFFFFFFFFFFFFFFFFFFFFFFFFFFFFFFFFFFFFFFFFFFFFFFFFFF,FFFFFFFFFFFFFFF,FFF,F
FFFFFFFFFFFF:FFFFFFFFFF:FFFFFFFFFFFFFFFFFFFF,FFFFFFFFFFFF:FFFFFFFFFFFFFFFFFFFFFFFFFFFF
@A00155:342:HHGFNDSXY:1:2341:14669:12680 1:N:0:GAACCTAG+TCCGCATA
CTCTGGCCTATGGTCATCTCAATGCCGAGAGGGATGTGGAGGGCGAGAGAGAGCGACTTCTCTCGGGC
CCACAGCCTTACAGCTGTGGAGCACGGTATCCTCTGCCGAAACAGAGGTTGGACAAGACCGGAGGGGT
+
FFFFFFFFFFFFFFFFFFFFFFFFFFFFFFFFFFFFFFFFFFFFFFFFFFFFFFFFFFFFFFFFFFFFFFFFFFFF:FFFFF
FFFFFFFFFFFFFFFFFFFFFFFFFFFFFFFFFFFFFFFFFFFFFFFFFFFFFFFFFFFFFFFFFFFFFFFFFFFF::FFFFFFFFFFFF
@A00155:342:HHGFNDSXY:1:2341:29143:14105 1:N:0:GAACCTAG+TCCGCATA
AGAGCGACTTCTCTCGGGCCCACAGCCTTACAGCTGTGGAGCACGGTATCCTCTGCCGAAACAGAGGT
TGGACAAGACCGGAGGGGTCTCCTAGTTCCAAGGAGATGTACTCCGGGCTTGTTACGACCTACCGT
+
FFFFFFFFFFFFFFFFFFFFFFFFFFFFFFFFFFFFFFFFFFFFFFFFFFFFFFFFFFFFFFFFFFFFFFFFFFFF
FFFFFFFFFFFFFFFFFFFFFFFFFFFFFFFFFFFFFFFFFFFFFFFFFFFFFFFFFFFFFFFFFFFFFFFFFFFF:FFFF,FFFFFFFFFFFF
@A00155:342:HHGFNDSXY:1:2341:13503:26506 1:N:0:GAACCTAG+TCCGCATA
GAGCGACTTCTCTCGGGCCCACAGCCTTACAGCTGTGGAGCACGTTATCCTCTGCCGAAACAGAGGTT
GGACAAGACCGGAGGGGTCTCCTAGTTCCAAGGAGATGTACTCCGGGCTTGTTACGACCTACCGTG
+
FFFFFFF:FFFFFFFFFFFFFFFFFFFFFFFFFFFFFFFFFFFFFFFFFFFFFFFFFFFFFFFFFFFFFFFFFFFF:FFFFFFFFFFFFFFFF
FFFFFFFFFFFFFFFFFFFFFFFFFFFFFFFFFFFFFFFFFFFFFFFFFFFFFFFFFFFFFFFFFFFFFFFFFFFF:F
@A00155:342:HHGFNDSXY:1:2341:12237:31078 1:N:0:GAACCTAG+TCCGCATA
AGAGAGAGCGACTTCTCTCGGGCCCACAGCCTTACAGCTGTGGAGCACGGTATCCTCTGCCGAAACAG
AGGTTGGACAAGACCGGAGGGGTCTCCTAGTTCCAAGGAGATGTACTCCGGGCTTGTTACGACCTA
+
FFFFFFFFFFFFFFFFFFFFFFFFFFFFFFFFFFFFFFFFFFFFFFFFFFFFFFFFFFFFFFFFFFFFFFFFFFFF
FFFFFFFFFFFFFFFFFFFFFFFFFFFFFFFFFFFFFFFFFFFFFFFFFFFFFFFFFFFFFFFFFFFFFFFFFFFF
@A00155:342:HHGFNDSXY:1:2341:22191:32784 1:N:0:GAACCTAG+TCCGCATA
TTACAGCTGTGGAGCACGGTATCCTCTGCCGAAACAGAGGTTGGACAAGACCGGAGGGGTCTCCTGGT
TCCAAGGAGATGTACTCCGGGCTTGTTACGACCTACCGTGTAAGTCGTAGTCTAGTAGGCTACCTG
+
FFFFFFFFFFFFFFFFFFFFFFFFFFFFFFFFFFFFFFFFFFFFFFFFFFFFFFFFFFFFFFFFFFFFFFFFFFFF:FFFFFFFFFFFFFFFF
FFFFFFFFFFFFFFFFFFFFFFFFFFFFFFFFFFFFFFFFFFFFFFFFFFFFFFFFFFFFFFFFFFFFFFFFFFFF
@A00155:342:HHGFNDSXY:1:2341:13205:33724 1:N:0:GAACCTAG+TCCGCATA
AGAGAGAGCGACTTCTCTCGGGCCCACAGCCTTACAGCTGTGGAGCACGGTATCCTCTGCCGAAACAG
AGGTTGGACAAGACCGGAGGGGTCTCCTAGTTCCAAGGAGATGTACTCCGGGCTTGTTACGACCTA
+
FFFFFFFFFFFFFFFFFFFFFFFFFFFFFFFFFFFFFFFFFFFFFFFFFFFFFFFFFFFFFFFFFFFFFFFFFFFF
FFFFFFFFFFFFFFFFFFFFFFFFFFFFFFFFFFFFFFFFFFFFFFFFFFFFFFFFFFFFFFFFFFFFFFFFFFFF
@A00155:342:HHGFNDSXY:1:2341:15989:35133 1:N:0:GAACCTAG+TCCGCATA
ACCCCTCCGGTCTTGTCAAACCTCTGTTTCGGCAGAGGATACCGTGCTCCACAGCTGTAAGGCTGTGG
GCCCCGAGAGAAGTCGCTCTCTCGCCCTCCACATCCCTCTCGGCATTGAGATGACCATAGGCCAGAG
+
FFFFFFFFFFFFFFFFFFFFFFFFFFFFFFFFFFFFFFFFFFFFFFFFFFFFFFFFFFFFFFFFFFFFFFFFFFFF:FFFFFFFFFFFFFFFF
FFFFFFFFFFFFFFFFFFFFFFFFFFFFFFFFFFFFFFFFFFFFFFFFFFFFFFFFFFFFFFFFFFFFFFFFFFFF
@A00155:342:HHGFNDSXY:1:2342:30969:22748 1:N:0:GAACCTAG+TCCGCATA
GAGCGACTTCTCTCGGGCCCACAGCCTTACAGCTGTGGAGCACGGTATCCTCTGCCGAAACAGAGGTT
GGACAAGACCGGAGGGGTCTCCTAGTTCCAAGGAGATGTACTCCGGGCTTGTTACGACCTACCGTG
+
FFFFFFFFFFFFFFFFFFFFFFFFFFFFFFFFFFFFFFFFFFFFFFFFFFFFFFFFFFFFFFFFFFFFFFFFFFFF
FFFFFFFFFFFFFFFFFFFFFFFFFFFFFFFFFFFFFFFFFFFFFFFFFFFFFFFFFFFFFFFFFFFFFFFFFFFF
@A00155:342:HHGFNDSXY:1:2342:24189:34240 1:N:0:GAACCTAG+TCCGCATA
GAGAGCGACTTCTCTCGGGCCCACAGCCTTACAGCTGTGGAGCACGGTATCCTCTGCCGAAACAGAGG
TTGGACAAGACCGGAGGGGTCTCCTGGTTCCAAGGAGATGTACTCCGGGCTTGTTACGACCTACCG
```

FFFFFFFFFFFFFFFFFFFFFFFFFFFFFFFFFFFFFFFFFFFFFFFFFFFFFFFFFFFFFFFFFFFFFFFF  
FFFFFFFFFFFFFFFFFFFFFFFFFFFFFFFFFFFFFFFFFFFFFFFFFFFFFFFFFFFFFFFFFFFFFFFF  
@A00155:342:HHGFNDSXY:1:2344:10131:33348 1:N:0:GAACCTAG+TCCGCATA  
CTCAATGCCGAGAGGGATGTGGAGGGCGAGAGAGAGCGACTTCTCTCGGGCCCACAGCCTTACAGCTG  
TGGAGCACGGTATCCTCTGCCGAAACAGAGGTTGGACAAGACCGGAGGGGTCTCCTGGTTCCAAAGGA  
+  
FFFFFFFFF,F:FFFFFF,F:FFFFF,FF:F,FFFFFFFF:FFFFFFF:FF,FFFF,FFFFFFFFF,FF  
:FFFFFFF:FFFFFFF,F,FFFFFF,:F:FFF:FFFFFFFFF:FF:FFFFFFF,:F:FFFFFF:,F  
@A00155:342:HHGFNDSXY:1:2345:1090:3912 1:N:0:GAACCTAG+TCCGCATA  
GGATGTGGAGGGCGAGAGAGAGCGACTTCTCTCGGGCCCACAGCCTTACAGCTGTGGAGCACGGTATC  
CTCTGCCGAAACAGAGGTTGGACAAGACCGGAGGGGTCTCCTAGTTCCAAAGGAGATGTACTC  
+  
FFFFFFFF:FFFFFF,FFFF:FFFF,FFF:FFFFFF,FFFFFFFFFFFFFFFFFFFFFFFF:FFFFFF:F  
FFFFFF,FF:F::F,:FFFFFFFF:F:FFF:FFFFFFFFFFFFFFFF:FFFFFFFFF,FFF  
@A00155:342:HHGFNDSXY:1:2345:7247:9095 1:N:0:GAACCTAG+TCCGCATA  
CTTCTCTCGGGCCCACAGCCTTACAGCTGTGGAGCACGGTATCCTCTGCCGAAACAGAGGTTGGACAA  
GACCGGAGGGGTCTCCTAGTTCCAAAGGAGATGTACTCCGGGCTTGTTACGACCTACCGTGTAAGTC  
+  
FFFFFFFFFFFFFFFF:FFFFFFFFFFFFFFFFFFFFFFFFFFFFFFFFFFFFFFFFFFFFFFFFFFFFFFFF  
FFFFFFFFFFFFFFFFFFFFFFFFFFFFFFFFFFFFFFFFFFFFFFFF:FFFFFFFFFFFFFFFFFFFFFFFF  
@A00155:342:HHGFNDSXY:1:2346:16613:10692 1:N:0:GAACCTAG+TCCGCATA  
AGGGATGTGGAGGGCGAGAGAGAGCGACTTCTCTCGGGCCCACAGCCTTACAGCTGTGGAGCACGGTA  
TCCTCTGCCGAAACAGAGGTTGGACAAGACCGGAGGGGTCTCCTAGTTCCAAAGGAGATGTACTCCGG  
+  
FFFFFFFFFFFFFFFFFFFFFFFFFFFFFFFFFFFFFFFFFFFFFFFFFFFFFFFFFFFFFFFFFFFFFFFF  
FFFFFFFFFFFFFFFFFFFFFFFF,FFFFFFFFFFFFFFFFFFFFFFFFFFFFFFFFFFFFFFFFFFFFFFFF:  
@A00155:342:HHGFNDSXY:1:2346:20175:22341 1:N:0:GAACCTAG+TCCGCATA  
TGTCCACTTAAGGACTCACCTCTGGCCTATGGTCATCTCTATGCCGAGAGGGATGTGGAGGGCGAGAG  
AGAGCGACTTCTCTCGGGCCCACAGCCTTACAGCTGTGGAGCACGGTATCCTCTGCCGAAACAGAGGT  
+  
FFFF,F,FFFF:FFFFFF:FFFF,FFFFFFFF:FFFFFFF,FFF,FF:F:FFF:FFF:FFFF:  
:FFFF:FF:F:FFFFFFF:FFFF:FFFFFFFFFFFFFFFF::,F,FFFFFFFFFFFFFFFFFFFFFFFF  
@A00155:342:HHGFNDSXY:1:2346:10411:25316 1:N:0:GAACCTAG+TCCGCATA  
TCAATGCCGAGAGGGATGTGGAGGGCGAGAGAGAGCGACTTCTCTCGGGCCCACAGCCTTACAGCTGT  
GGAGCACGGTATCCTCTGCCGAAACAGAGGTTGGACAAGACCGGAGGGGTCTCCTAGTTCCAAAGGAG  
+  
FFFFFFF::FFF:FFFF,:FF,F:FFFFFFFF:FFFF::FFFFFF:FFFF:FFFF:FFFF:F:F:::  
FFF:FFF,FF:F:FFFF:FFFFFFFFF,FF:FFFFFFF:,FFFFFFFFFFFFFF:,FFFFFFFFF:  
@A00155:342:HHGFNDSXY:1:2347:3911:2127 1:N:0:GAACCTAG+TCCGCATA  
CTCAATGCCGAGAGGGATGTAGAGGGCGAGAGAGAGCGACTTCTCTCGGGCCCACAGCCTTACAGCTG  
TGGAGCACGGTATCCTCTGCCGAAACAGAGGTTGGACAAGACCGGAGGGGTCTCCTAGTTCCAAAGGA  
+  
FFFFFFFFFFFFFFFFFFFFFFFFFFFFFFFFFFFFFFFFFFFFFFFFFFFFFFFFFFFFFFFFFFFFFFFF  
FFFFFFFFFFFFFFFFFFFFFFFFFFFFFFFFFFFFFFFFFFFFFFFFFFFFFFFFFFFFFFFFFFFFFFFF  
@A00155:342:HHGFNDSXY:1:2347:10529:4726 1:N:0:GAACCTAG+TCCGCATA  
GGATGTGGAGGGCGAGAGAGAGCGACTTCTCTCGGGCCCACAGCCTTACAGCTGTGGAGCACGGTATC  
CTCTGCCGAAACAGAGGTTGGACAAGACCGGAGGGGTCTCCTAGTTCCAAAGGAGATGTACTCC  
+  
FFFFFFFFFFFFFFFFFFFFFFFFFFFFFFFFFFFFFFFFFFFFFFFFFFFFFFFFFFFFFFFFFFFFFFFF  
FFFFFFFFFFFFFFFFFFFFFFFFFFFFFFFFFFFFFFFFFFFFFFFFFFFFFFFFFFFFFFFFFFFFFFFF:FFFF  
@A00155:342:HHGFNDSXY:1:2347:10682:5306 1:N:0:GAACCTAG+TCCGCATA  
GGATGTGGAGGGCGAGAGAGAGCGACTTCTCTCGGGCCCACAGCCTTACAGCTGTGGAGCACGGTATC  
CTCTGCCGAAACAGAGGTTGGACAAGACCGGAGGGGTCTCCTAGTTCCAAAGGAGATGTACTCC  
+

FFFFFFFFFFFFFFFFFFFFFFFFFFFFFFFFFFFFFFFFFFFFFFFFFFFFFFFFFFFFFFFFFFFFFFFF  
FFFFFFFFFFFFFFFFFFFFFFFFFFFFFFFFFFFFFFFFFFFFFFFFFFFFFFFFFFFFFFFFFFFFFFFF  
@A00155:342:HHGFNDSXY:1:2348:27805:7905 1:N:0:GAACCTAG+TCCGCATA  
CTCAATGCCGAGAGGGATGTGGAGGGCGAGAGAGAGCGACTTCTCTCGGGCCCACAGCCTTACAGCTG  
TGGAGCACGGTATCCTCTGCCGAAACAGAGGTTGGACAAGACCGGAGGGGTCTCCTAGTTCCAAAGGA  
+  
FFFFFFFFFFFFFFFFFFFFFFFFFFFFFFFFFFFFFFFFFFFFFFFFFFFFFFFFFFFFFFFFFFFFFFFF  
FFFFFFFFFFFFFFFFFFFFFFFFFFFFFFFFFFFFFFFFFFFFFFFFFFFFFFFFFFFFFFFFFFFFFFFF  
@A00155:342:HHGFNDSXY:1:2348:21585:8187 1:N:0:GAACCTAG+TCCGCATA  
AGAGAGAGCGACTTCTCTCGGGCCCACAGCCTTACAGCTGTGGAGCACGGTATCCTCTGCCGAAACAG  
AGGTTGGACAAGACCGGAGGGGTCTCCTAGTTCCAAAGGAGATGTACTCCGGGCTTGTTACGACCTA  
+  
FFFFFFFFFFFFFFFFFFFFFFFFFFFFFFFFFFFFFFFFFFFFFFFFFFFFFFFFFFFFFFFFFFFFFFFF  
FFFFFFFFFFFFFFFFFFFFFFFFFFFFFFFFFFFFFFFFFFFFFFFFFFFFFFFFFFFFFFFFFFFFFFFF  
@A00155:342:HHGFNDSXY:1:2348:7301:21277 1:N:0:GAACCTAG+TCCGCATA  
ATCTCAATGCCGAGAGGGATGTGGAGGGCGAGAGAGAGCGACTTCTCTCGGGCCCACAGCCTTACAGC  
TGTGGAGCACGGTATCCTCTGCCGAAACAGAGGTTGGACAAGACCGGAGGGGTCTCCTTGTTCCAAAG  
+  
FF,F,FFFFFFFF:FF:FFFFFFFFFFFFFFFFFFFFFFFF:FF:FFFFFFFF,FFF:FFFFFFFF,  
FFFFFFFF,FF:F:FFFFFFFFFFFFFFFF,F::FFFFFFFF:FFFFFF:FFFFFFFF:FFFFFFFF  
@A00155:342:HHGFNDSXY:1:2348:24388:21527 1:N:0:GAACCTAG+TCCGCATA  
GGGCGAGAGAGAGCGACTTCTCTCGGGCCCACAGCCTTACAGCTGTGGAGCACGGTATCCTCTGCCGA  
AACAGAGGTTGGACAAGACCGGAGGGGTCTCCTAGTTCCAAAGGAGATGTACTCCGGGCTTGTTACG  
+  
FFFFFFFFFFFFFFFFFFFFFFFFFFFFFFFFFFFFFFFFFFFFFFFFFFFFFFFFFFFFFFFFFFFFFFFF:FF  
FFFFFFFFFFFFFFFFFFFFFFFFFFFFFFFFFFFFFFFFFFFFFFFFFFFFFFFFFFFFFFFFFFFFFFFF  
@A00155:342:HHGFNDSXY:1:2348:2691:21621 1:N:0:GAACCTAG+TCCGCATA  
GAGAGCGACTTCTCTCGGGCCCACAGCCTTACAGCTGTGGAGCACGGTATCCTCTGCCGAAACAGAGG  
TTGGACAAGACCGGAGGGGTCTCCTAGTTCCAAAGGAGATGTACTCCGGGCTTGTTACGACCTACCG  
+  
FFFFFFFFFFFFFFFFFFFFFFFFFFFFFFFFFFFFFFFFFFFFFFFFFFFFFFFFFFFFFFFFFFFFFFFF  
FFFFFFF:FFFFFFFFFFFFFFFFFFFFFFFFFFFFFFFFFFFFFFFFFFFFFFFFFFFFFFFFFFFFFFFF  
@A00155:342:HHGFNDSXY:1:2348:15338:22357 1:N:0:GAACCTAG+TCCGCATA  
AGAGAGAGCGACTTCTCTCGGGCCCACAGCCTTACAGCTGTGGAGCACGGTATCCTCTGCCGAAACAG  
AGGTTGGACAAGACCGGAGGGGTCTCCTAGTTCCAAAGGAGATGTACTCCGGGCTTGTTACGACCTA  
+  
FFFFFFFFFFFFFFFFFFFFFFFFFFFFFFFFFFFFFFFFFFFFFFFFFFFFFFFFFFFFFFFFFFFFFFFF  
FFFFFFFFFFFF:FFFFFFFFFFFFFFFFFFFFFFFFFFFFFFFFFFFFFFFFFFFFFFFFFFFFFFFFFFFF  
@A00155:342:HHGFNDSXY:1:2348:2284:22545 1:N:0:GAACCTAG+TCCGCATA  
CACAGCCTTACAGCTGTGGAGCACGGTATCCTCTGCCGAAACAGAGGTTGGACAAGACCGGAGGGGTC  
TCCTAGTTCCAAAGGAGATGTACTCCGGGCTTGTTACGACCTACCGTGTAAGTCGTAGTCTAGTAGG  
+  
FFFFFFFFFFFF:FFFFFFFFFFFFFFFFFFFFFFFFFFFFFFFFFFFFFFFFFFFFFFFFFFFFFFFFFFFF  
FFFFFFFFFFFFFFFFFFFFFFFFFFFF:FFF:FFFFFFFFFFFFFFFFFFFF,FFFFFFFFFFFFFF:FF:FFFF  
@A00155:342:HHGFNDSXY:1:2348:31033:27774 1:N:0:GAACCTAG+TCCGCATA  
GAGCGACTTCTCTCGGGCCCACAGCCTTACAGCTGTGGAGCACGGTATCCTCTGCCGAAACAGAGGTT  
GGACAAGACCGGAGGGGTCTCCTAGTTCCAAAGGAGATGTACTCCGGGCTTGTTACGACCTACCGTG  
+  
FFFFFFFFFFFFFFFFFFFFFFFFFFFFFFFFFFFFFFFFFFFFFFFFFFFFFFFFFFFFFFFFFFFFFFFF  
FFFFFFFFFFFFFFFFFFFFFFFFFFFF:FFFFFFFFFFFF:FFFFFFFFFFFFFFFF:FFF:FF:FFFFFF:FF  
@A00155:342:HHGFNDSXY:1:2348:7066:29074 1:N:0:GAACCTAG+TCCGCATA  
GTATCCTCTGCCGAAACAGAGGTTGGACAAGACCGGAGGGGTCTCCTAGTTCCAAAGGAGATGTACTC  
CGGGCTTGTTACGACCTACCGTGTAAGTCGTAGTCTAGTAGGCTACCTGACGAGTCCTTTTAGGAC  
+

FFFFFFFFFFFFFFFFFFFFFFFFFFFFFFFFFFFFFFFFFFFFFFFFFFFFFFFFFFFFFFFFFFFFFFFF  
FFFFFFFFFFFFFFFFFFFFFFFFFFFFFFFFFFFFFFFFFFFFFFFFFFFFFFFFFFFFFFFFFFFFFFFF:FFFFFFFF  
@A00155:342:HHGFNDSXY:1:2349:22363:3270 1:N:0:GAACCTAG+TCCGCATA  
GAGAGAGCGACTTCTCTCGGGCCACAGCCTTACAGCTGTGGTGCACGGTATCCTCTGCCGAAACAGA  
GGTTGGACAAGACCGGAGGGGTCTCCTAGTTCCAAAGGAGATGTACTCCGGGCTTGTTACGACCTAC  
+  
FFFFFFFFFFFFFFFFFFFFFFFFFFFFFFFFFFFFFFFFFFFFFFFFFFFFFFFFFFFFFFFFFFFFFFFF  
FFFFFFFFFFFFFFFFFFFFFFFFFFFFFFFFFFFFFFFFFFFFFFFFFFFFFFFFFFFFFFFFFFFFFFFF  
@A00155:342:HHGFNDSXY:1:2349:27407:20369 1:N:0:GAACCTAG+TCCGCATA  
AGCGACTTCTCTCGGGCCACAGCCTTACAGCTGTGGAGCACGGTATCCTCTGCCGAAACAGAGGTTG  
GACAAGACCGGAGGGGTCTCCTAGTTCCAAAGGAGATGTACTCCGGGCTTGTTACGACCTACCGTGT  
+  
FFFFFFFFFFFFFFFFFFFFFFFFFFFFFFFFFFFFFFFFFFFFFFFFFFFFFFFFFFFFFFFFFFFFFFFF  
FFFFFFFFFFFFFFFFFFFFFFFFFFFFFFFFFFFFFFFFFFFFFFFFFFFFFFFFFFFFFFFFFFFFFFFF  
@A00155:342:HHGFNDSXY:1:2350:19542:3865 1:N:0:GAACCTAG+TCCGCATA  
CACCTCTGGCCTATGGTCATCTCAATGCCGAGAGGGATGTGAAGGGCGAGAGAGAGCGACTTCTCTCG  
GGCCACAGCCTTACAGCTGTGGAGCACGGTATCCTCTGCCGAAACAGAGGTTGGACAAGACCGGAGG  
+  
FFFFFFFFFFFFFFFFFFFFFFFFFFFFFFFFFFFFFFFFFFFFFFFFFFFFFFFFFFFFFFFFFFFFFFFF  
FFFFFFFFFFFFFFFFFFFFFFFFFFFFFFFFFFFFFFFFFFFFFFFFFFFFFFFFFFFFFFFFFFFFFFFF  
@A00155:342:HHGFNDSXY:1:2350:13304:11663 1:N:0:GAACCTAG+TCCGCATA  
ATGCCGAGAGGGATGTGGAGGGCGAGAGAGAGCGACTTCTCTCGGGCCACAGCCTTACAGCTGTGGA  
GCACGGTATCCTCTGCCGAAACAGAGGTTGGACAAGACCGGAGGGGTCTCCTAGTTCCAAAGGAGATG  
+  
FFFFFFFFFFFFFFFFFFFFFFFFFFFFFFFFFFFFFFFFFFFFFFFFFFFFFFFFFFFFFFFFFFFFFFFF:FFFFFFFF  
FFFFFFFFFFFFFFFFFFFFFFFFFFFFFFFFFFFFFFFFFFFFFFFFFFFFFFFFFFFFFFFFFFFFFFFF  
@A00155:342:HHGFNDSXY:1:2350:4716:17895 1:N:0:GAACCTAG+TCCGCATA  
TCTCTCGGGCCACAGCCTTACAGCTGTGGAGCACGGTATCCTCTGCCGAAACAGAGGTTGGACAAGA  
CCGAGAGGGGTCTCCTAGTTCCAAAGGAGATGTACTCCGGGCTTGTTACGACCTACCGTGTAAAGTCGT  
+  
FFFFFFFFFFFFFFFFFFFFFFFF:FFFFFFFFFFFFFFFFFFFFFFFFFFFFFFFF:FFFFFFFFFFFFFFFF  
FFFFFFFFFFFFFFFFFFFFFFFFFFFFFFFFFFFFFFFFFFFFFFFFFFFFFFFFFFFFFFFFFFFFFFFF  
@A00155:342:HHGFNDSXY:1:2350:18150:26349 1:N:0:GAACCTAG+TCCGCATA  
CTCTGCCGAAACAGAGGTTGGACAAGACCGGAGGGGTCTCCTAGTTCCAAAGGAGATGTACTCCGGGC  
TTGTTACGACCTACCGTGTAAAGTCGTAGTCTAGTAGGCTACCTGACGAGTCCTTTTAGGACGAAAC  
+  
FFFFFFFFFFFFFFFFFFFFFFFF:FFFFFFFFFFFFFFFFFFFFFFFFFFFFFFFF:FFFFFFFFFFFFFFFF  
FFFFFFFFFFFFFFFFFFFFFFFFFFFFFFFFFFFFFFFFFFFFFFFFFFFFFFFFFFFFFFFF:FFFFFFFF:FF  
@A00155:342:HHGFNDSXY:1:2350:27905:29183 1:N:0:GAACCTAG+TCCGCATA  
GGCCAGAGGTGAGTCCTTAAGTGGACACAGCTGATCTAAGGCGGTGTGGCGGGGCATGGGTTTGAACC  
CCCATGACGGTCGGAGTCTAGTAGGCTCCCTGATGAGTCCGTTCCAAGGACGAAACCGTCGTTACTCT  
+  
FFFFFFFFFFFFFFFFFFFFFFFFFFFFFFFFFFFFFFFFFFFFFFFFFFFFFFFFFFFFFFFFFFFFFFFF  
FFFFFFFFFFFFFFFFFFFFFFFFFFFFFFFFFFFFFFFFFFFFFFFFFFFFFFFFFFFFFFFF,FFFFFFFF  
@A00155:342:HHGFNDSXY:1:2350:26350:32534 1:N:0:GAACCTAG+TCCGCATA  
TATCCTCTGCCGAAACAGAGGTTGGACAAGACCGGAGGGGTCTCCTAGTTCCAAAGGAGATGTACTCC  
GGGCTTGTTACGACCTACCGTGTAAAGTCGTAGTCTAGTAGGCTACCTGACGAGTCCTTTTAGGACG  
+  
FFFFFFFFFFFFFFFFFFFFFFFFFFFFFFFFFFFFFFFFFFFFFFFFFFFFFFFFFFFFFFFFFFFFFFFF  
FFFFFFFFFFFFFFFFFFFFFFFFFFFFFFFFFFFFFFFFFFFFFFFFFFFFFFFFFFFFFFFFFFFFFFFF  
@A00155:342:HHGFNDSXY:1:2350:27308:34287 1:N:0:GAACCTAG+TCCGCATA  
TGTCCACTTAAGGACTCACCTCTGGCCTATGGTCATCTCAATGCCGAGAGGGATGTGGAGGGCGAGAG  
AGAGCGACTTCTCTCGGGCCACAGCCTTACAGCTGTGGAGCACGGTATCCTCTGCCGAAACAGAGGT  
+

```
FFFFFFFFFFFFFFFFFFFFFFFFFFFFFFFFFFFFFFFFFFFFFFFFFFFFFFFFFFFFFFFFFFFFF:FFF:FFFFFFFF  
FFFFFFFFFFFFFFFFFFFFFFFFFFFFFFFFFFFFFFFFFFFFFFFFFFFFFFFFFFFFFFFFFFFFFFF@A00155:342:HHGFNDSXY:1:2351:15076:10880 1:N:0:GAACCTAG+TCCGCATA  
TCCTCTGCCGAAACAGAGTTGGACAAGACCGGAGGGGTCTCCTAGTTCAAAGGAGATGTACTCCGG  
GCTTGTTACGACCTACCGTGTAAGTCGTAGTCTAGTAGGCTACCTGACGAGTCCTTTTTAGGACGAA  
+  
FFFFFFFFFFFFFFFFFFFFFFFFFFFFFFFFFFFFFFFFFFFFFFFFFFFFFFFFFFFFFFFFFFFFFFF  
FF:FFFFFFFFFFFFFFFFFFFFFFFFFFFFFFFFFFFFFFFFFFFFFFFFFFFFFFFFFFFFFFFFFFFFF@A00155:342:HHGFNDSXY:1:2351:28556:17409 1:N:0:GAACCTAG+TCCGCATA  
CTTCTCTCGGGCCCACAGCCTTACAGCTGTGGAGCACGGTATCCTCTGCCGAAACAGAGGTTGGACAA  
GACCGGAGGGGTCTCCTAGTTCAAAGGAGATGTACTCCGGGCTTGTTACGACCTACCGTGTAAGTC  
+  
FFFFFFFFFFFFFFFFFFFFFFFFFFFFFFFFFFFFFFFFFFFFFFFFFFFFFFFFFFFFFFFFFFFFFFF  
FFFFFFFFFFFFFFFFFFFFFFFFFFFFFFFFFFFFFFFFFFFFFFFFFFFFFFFFFFFFFFFFFFFFFFF@A00155:342:HHGFNDSXY:1:2351:24966:30639 1:N:0:GAACCTAG+TCCGCATA  
TCTGTTTCGGCAGAGGATACC GTGCTCCACAGCTGTAAGGCTGTGGGCCCGAGAGAAGTCGCTCTCTC  
TCGCCCTTACATCCCTCTCGGCATTGAGATGACCATAGGCCAGAGGTGAGTCCTTAAGTGGACACAG  
+  
FFFFFFFFFFFF:F:FFFFFFFFFFFFFFFFFFFFFFFFFFFFFFFFFFFFFFFFFFFFFFFFFFFFFFFFFFFFF  
FFFFFFFF:F:FFFFFFFFFFFFFFFFFFFFFFFFFFFFFFFFFFFFFFFFFFFFFFFFFFFFFFFFFFFFFFFFF@A00155:342:HHGFNDSXY:1:2352:29143:8343 1:N:0:GAACCTAG+TCCGCATA  
CTTCTCTCGGGCCCACAGCCTTACAGCTGTGGAGCACGGTATCCTCTGCCGAAACAGAGGTTGGACAA  
GACCGGAGGGGTCTCCTAGTTCAAAGGAGATGTACTCCGGGCTTGTTACGACCTACCGTGTAAGTC  
+  
FFFFFFFFFFFFFFFFFFFFFFFFFFFFFFFFFFFFFFFFFFFFFFFFFFFFFFFFFFFFFFFFFFFFFFF  
FFFF:FFFFFFFFFFFFFFFFFFFFFFFFFFFFFFFFFFFFFFFFFFFFFFFFFFFFFFFFFFFFFFFFFFFFF:FFFFFFF@A00155:342:HHGFNDSXY:1:2352:13160:16423 1:N:0:GAACCTAG+TCCGCATA  
GAGGGCGAGAGAGAGCGACTTCTCTCGGGCCCACAGCCTTACAGCTGTGGAGCACGGTATCCTCTGCC  
GAAACAGAGGTTGGACAAGACCGGAGGGGTCTCCTAGTTCAAAGGAGATGTACTCCGGGCTTGTTCA  
+  
FFFFFFFFFFFFFFFFFFFFFFFFFFFFFFFFFFFFFFFFFFFFFFFFFFFFFFFFFFFFFFFFFFFFFFF  
FFFFFFFFFFFFFFFFFFFFFFFFFFFFFFFFFFFFFFFFFFFFFFFFFFFFFFFFFFFFFFFFFFFFFFF@A00155:342:HHGFNDSXY:1:2352:18774:22420 1:N:0:GAACCTAG+TCCGCATA  
GAGAGCGACTTCTCTCGGGCCCCACAGCCTTACAGCTGTGGAGCACGGTATCCTCTGCCGAAACAGAGG  
TTGGACAAGACCGGAGGGGTCTCCTAGTTCAAAGGAGATGTACTCCGGGCTTGTTACGACCTACCG  
+  
FFFFFFFFFFFFF,:FFFF:FF,,FFFFFFFFFFFFFFFFFFFFFFFFF,:FFFFFF,F:FFFF:FFFFFFF:F:F  
FFFFFFFFFFFFFFFFFFFF,FFF:,F:F,:FF,FFF:,FFFFFFF,FFF,FFF,:FFFF,F,F,FF,F  
@A00155:342:HHGFNDSXY:1:2353:12572:5760 1:N:0:GAACCTAG+TCCGCATA  
CCACATCCCTCTCGGCATTGAGATGACCATAGGCCAGAGGTGAGTCCTTAAGTGGACACAGCTGATCT  
AAGGCGGTGTGGCGGGCATGGGTTGAACCCCATGACGGTCGGAGTCTAGTAGGCTCCCTGATGAG  
+  
FFFFFFFFFFFFFFFFFFFFFFFFFFFFFFF:FFFFFFFFFFFFFFFFFFFFFFFFFFFFFFFFFFFFFFF  
,FFFFFFFFFFFFFFFFFFFFFFFFFFFFFFFFFFFFFFFFFFFFFFFFFFFFFFFFFFFFFFFFFFFFFFF@A00155:342:HHGFNDSXY:1:2353:5394:6104 1:N:0:GAACCTAG+TCCGCATA  
GGCCTATGGTCATCTCAATGCCGAGAGGGATGTGGAGGGCGAGAGAGAGCGACTTCTCTCGGGCCCAC  
AGCCTTACAGCTGTGGAGCACGGTATCCTCTGCCGAAACAGAGGTTGGACAAGACCGGAGGGGTCTCC  
+  
FFFFFFFFFFFFFFFFFFFFFFFFFFFFFFFFFFFFFFFFFFFFFFFFFFFFFFFFFFFFFFFFFFFFFFF:FFFFFFF  
FFFFFFF::FFFFFFFFFFFFFFFFFFFFFFFFFFFFFFFFFFFFFFFFFFFFFFFFFFFFFFFFFFFFFFFFF:FFFFFFF  
@A00155:342:HHGFNDSXY:1:2353:29315:13119 1:N:0:GAACCTAG+TCCGCATA  
ACCCCTCCGGTCTTGTCCAACCTCTGTTTCGGCAGAGGATACC GTGCTCCACAGCTGTAAGGCTGTGG  
GCCGAGAGAAGTCGCTCTCTCTCGCCCTCCACATCCCTCTCGGCATTGAGATGACCATAGGCCAGAG
```

```

FFFFFFFFFFFFFFFFFFFFFFFFFFFFFFFFFFFFFFFFFFFFFFFFFFFFFFFFFFFFFFFFFFFFFFFFF:FFFFFFFFFFFFFFFFFFFFFFFFFFF
FFFFFFFFFFFFFFFFFFFFFFFFFFFFFFFFFFFFFFFFFFFFFFFFFFFFFFFFFFFFFFFFFFFFFFFFF:FFFFFFFFFFFFFFFFFFFFFFFFFFF
@A00155:342:HHGFNDSXY:1:2353:14018:14434 1:N:0:GAACCTAG+TCCGCATA
ACTTCTCTCGGGCCCACAGCCTTACAGCTGTGGAGCACGGTATCCTCTGCCGAAACAGAGGTTGGACA
AGACCGGAGGGGTCTCCTGGTTCAAAGGAGATGTACTCCGGGCTTGTTACGACCTACCGTGTAAGT
+
FFFFFFFFFFFFFFFFFFFFFFFFFFFFFFFFFFFFFFFFFFFFFFFFFFFFFFFFFFFFFFFFFFFFFFFFF
FFFFFFFFFFFFFFFFFFFFFFFFFFFFFFFFFFFFFFFFFFFFFFFFFFFFFFFFFFFFFFFFFFFFFFFFF
@A00155:342:HHGFNDSXY:1:2353:15302:18192 1:N:0:GAACCTAG+TCCGCATA
GTCCAATTAAAGGACTCACCTCTGGCCTATGGTCATCTCAATGCCGAGAGGGATGTGGAGGGCGAGAGA
GAGCGACTTCTCTCGGGCCCACAGCCTTACAGCTGTGGAGCACGGTATCCTCTGCCGAAACAGAGGTT
+
FFFFFFFFFFF:FFFFFFFFFFFFFFFFFF:FFFFFFFFFFFFFFFFFFFFFFFFFFFFFFFFFFFFFFFFF
F:FFFFFFFFFFFFFFFFFFFFFFFFFFFFFFFFFFFFFFFFFFFFFFFFFFFFFFFFFFFFFFFFFFFFFFFFF
@A00155:342:HHGFNDSXY:1:2353:20699:21308 1:N:0:GAACCTAG+TCCGCATA
GAGCGACTTCTCTCGGGCCCACAGCCTTACAGCTGTGGAGCACGTTATCCTCTGCCGAAACAGAGGTT
GGACAAGACCGGAGGGGTCTCCTAGTTCAAAGGAGATGTACTCCGGGCTTGTTACGACCTACCGTG
+
FFFFFFFFFFFFFFFFFFFFFFFFFFFFFFFFFFFFFFFFFFFFFFFFFFFFFFFFFFFFFFFFFFFFFFFFF
FFFFFFFFFFFFFFFFFFFFFFFFFFFFFFFFFFFFFFFFFFFFFFFFFFFFFFFFFFFFFFFFFFFFFFFFF
@A00155:342:HHGFNDSXY:1:2353:5837:34585 1:N:0:GAACCTAG+TCCGCATA
AGCGACTTCTCTCGGGCCCACAGCCTTACAGCTGTGGAGCACGGTATCCTCTGCCGAAACAGAGGTTG
GACAAGACCGGAGGGGTCTCCTGGTTCAAAGGAGATGTACTCCGGGCTTGTTACGACCTACCGTGT
+
FFFFFFFFFFFFFFFFFFFFFFFFFFFFFFFFFFFFFFFFFFFFFFFFFFFFFFFFFFFFFFFFFFFFFFFFF:FFFFFFFFFFFFFFFFF,
FFFFFFFF:F:FFFFF,:FFFFFFFFFFFFFFFFFFFFFFFFFFFFFFFFFFFFFFFF:FFFFFF:FFFFFF:::,F,FF
@A00155:342:HHGFNDSXY:1:2354:12066:2065 1:N:0:GAACCTAG+TCCGCATA
CAATGCCGAGAGGGATGTAGAGGGCGAGAGAGAGCGACTTCTCTCGGGCCCACAGCCTTACAGCTGTG
GAGCACGGTATCCTCTGCCGAAACAGAGGTTGGACAAGACCGGAGGGGTCTCCTAGTTCAAAGGAGA
+
FFFFFFFFFFFFFFFFFFFFFFFFFFFFFFFFFFFFFFFFFFFFFFFFFFFFFFFFFFFFFFFFFFFFFFFFF
FFFF:FFFFFFFFFFFFFFFFFFFFFFFFFFFFFFFFFFFFFFFFFFFFFFFFFFFFFFFFFFFFFFFFFFFFF:FFFFFFF
@A00155:342:HHGFNDSXY:1:2354:21658:3959 1:N:0:GAACCTAG+TCCGCATA
GCTGTGTCCAATTAAGGACTCACCTCTGGCCTATGGTCATCTCAATGCCGAGAGGGATGTAGAGGGCG
AGAGAGAGCGACTTCTCTCGGGCCCACAGCCTTACAGCTGTGGAGCACGGTATCCTCTGCCGAAACA
+
FFFFF,F:FFFF,FFF:FFFFFFFFF,:,F,F,FFFF:FFFF,:F:FFFF,F:F:FFFF:F,F
::F:FFFF,FF,,F:FFFF:,F,FFFF:,FFFF,FF:F::FF,FFF,, :FFFFFF,:::FFFF
@A00155:342:HHGFNDSXY:1:2354:32099:17754 1:N:0:GAACCTAG+TCCGCATA
GCGACTTCTCTCGGGCCCACAGCCTTACAGCTGTGGAGCACGGTATCCTCTGCCGAAACAGAGGTTGG
ACAAGACCGGAGGGGTCTCCTAGTTCAAAGGAGATGTACTCCGGGCTTGTTACGACCTACCGTGTA
+
FFFFFFFFFFFFFFFFFFFFFFFFFFFFFFFFFFFFFFFFFFFFFFFFFFFFFFFFFFFFFFFFFFFFFFFFF
FFFFFFFFFFFFFFFFFFFFFFFFFFFFFFFFFFFFFFFFFFFFFFFFFFFFFFFFFFFFFFFFFFFFFFFFF:FFF
@A00155:342:HHGFNDSXY:1:2354:6234:19617 1:N:0:GAACCTAG+TCCGCATA
GTCATCTCAATGCCGAGAGGGATGTGGAGGGCGAGAGAGAGCGACTTCTCTCGGGCCCACAGCCTTAC
AGCTGTGGAGCACGGTATCCTCTGCCGAAACAGAGGTTGGACAAGACCGGAGGGGTCTCCTAGTTCCA
+
FFFFFFFFFFFFFFFFFFFFFFFFFFFFFFFFFFFFFFFFFFFFFFFFFFFFFFFFFFFFFFFFFFFFFFFFF
FFFFFFFFFFFFFFFFFFFFFFFFFFFFFFFFFFFFFFFFFFFFFFFFFFFFFFFFFFFFFFFFFFFFFFFFF:FFFFFFFFFFFFFFFFFFFFFFFFFFF
@A00155:342:HHGFNDSXY:1:2354:23827:26788 1:N:0:GAACCTAG+TCCGCATA
GAGAGAGCGACTTCTCTCGGGCCCACAGCCTTACAGCTGTGGAGCACGGTATCCTCTGCCGAAACAGA
GGTTGGACAAGACCGGAGGGGTCTCCTAGTTCAAAGGAGATGTACTCCGGGCTTGTTACGACCTAC
+
```

FFFFFFFFFFFFFFFFFFFFFFFFFFFFFFFFFFFFFFFFFFFFFFFFFFFFFFFFFFFFFFFFFFFFFFFF  
FFFFFFFFFFFFFFFFFFFFFFFFFFFFFFFFFFFFFFFFFFFFFFFFFFFFFFFFFFFFFFFFFFFFFFFF  
@A00155:342:HHGFNDSXY:1:2356:27760:20290 1:N:0:GAACCTAG+TCCGCATA  
ACTTCTCTCGGGCCACAGCCTTACAGCTGTGGAGCACGGTATCCTCTGCCGAAACAGAGGTTGGACA  
AGACCGGAGGGGTCTCCTAGTTCCAAAGGAGATGTACTCCGGGCTTGTTACGACCTACCGTGTAAGT  
+  
FFFFFFFFFFFFFFFFFFFFFFFFFFFFFFFFFFFFFFFFFFFFFFFFFFFFFFFFFFFFFFFFFFFFFFFF  
FFFFFFFFFFFFFFFFFFFFFFFFFFFFFFFFFFFFFFFFFFFFFFFFFFFFFFFFFFFFFFFFFFFFFFFF:  
@A00155:342:HHGFNDSXY:1:2357:12156:1031 1:N:0:GAACCTAG+TCCGCATA  
TGGTCATCTCAATGCCGAGAGGGATGTGGAGGGCGAGAGAGAGCGACTTCTCTCGGGCCACAGCCTT  
ACAGCTGTGGAGCACGGTATCCTCTGCCGAAACAGAGGTTGGACAAGACCGGAGGGGTCTCCTAGTTC  
+  
FFFFFFFFFFFFFFFFFFFFFFFFFFFFFFFFFFFFFFFFFFFFFFFFFFFFFFFFFFFFFFFFFFFFFFFF:  
FFFFFFFFFFFFFFFFFFFFFFFFFFFFFFFFFFFFFFFFFFFFFFFFFFFFFFFFFFFFFFFFFFFFFFFF  
@A00155:342:HHGFNDSXY:1:2357:6822:2691 1:N:0:GAACCTAG+TCCGCATA  
TGCCGAGAGGGATGTGGAGGGCGAGAGAGAGCGACTTCTCTCGGGCCACAGCCTTACAGCTGTGGAG  
CACGGTATCCTCTGCCGAAACAGAGGTTGGACAAGACCGGAGGGGTCTCCTAGTTCCAAAGGAGATGT  
+  
FFFFFFFFFFFFFF:FFFFFFFFFFFFFFFFFFFFFFFFFFFFFFFFFFFFFFFFFFFFFFFFFFFFFFFF  
FFFFFFFFFFFFFFFFFFFFFFFFFFFFFFFFFFFFFFFFFFFFFFFFFFFFFFFFFFFFFFFFFFFFFFFF  
@A00155:342:HHGFNDSXY:1:2357:29487:5462 1:N:0:GAACCTAG+TCCGCATA  
CCTCTGGCCTATGGTCATCTCAATGCCGAGAGGGATGTGAAGGGCGAGAGAGAGCGACTTCTCTCGGG  
CCCACAGCCTTACAGCTGTGGAGCACGGTATCCTCTGCCGAAACAGAGGTTGGACAAGACCGG  
+  
FFFFFFFFFFFFFFFFFFFFFFFFFFFFFFFFFFFFFFFFFFFFFFFFFFFFFFFFFFFFFFFFFFFFFFFF:  
FF::FFFFFFFFFFFFFFFFFFFFFFFF:FF,F:FFFF,FFFFFFFF,FFF:F,, :FF:FFFFFFFF  
@A00155:342:HHGFNDSXY:1:2357:15221:13698 1:N:0:GAACCTAG+TCCGCATA  
AGCGACTTCTCTCGGGCCACAGCCTTACAGCTGTGGAGCACGGTATCCTCTGCCGAAACAGAGGTTG  
GACAAGACCGGAGGGGTCTCCTAGTTCCAAAGGAGATGTACTCCGGGCTTGTTACGACCTACCGTGT  
+  
FFFFFFFFFFFFFFFFFFFFFFFFFFFFFFFFFFFFFFFFFFFFFFFFFFFFFFFFFFFFFFFFFFFFFFFF:  
FFFFFFFFFFFFFFFFFFFFFFFFFFFFFFFFFFFFFFFFFFFFFFFFFFFFFFFFFFFFFFFFFFFFFFFF  
@A00155:342:HHGFNDSXY:1:2357:2284:15217 1:N:0:GAACCTAG+TCCGCATA  
GCGACTTCTCTCGGGCCACAGCCTTACAGCTGTGGAGCACGGTATCCTCTGCCGAAACAGAGGTTGG  
ACAAGACCGGAGGGGTCTCCTAGTTCCAAAGGAGATGTACTCCGGGCTTGTTACGACCTACCGTGTA  
+  
FFFFFFFFFFFFFFFFFFFFFFFFFFFFFFFFFFFFFFFFFFFFFFFFFFFFFFFFFFFFFFFFFFFFFFFF:  
FFFF,FFFF:FFFFFFFFFFFFFFFFFFFFFFFF:FFFFFFFF:FFFFF:FFFF:FFF::FFFF:F:FF  
@A00155:342:HHGFNDSXY:1:2357:9652:27821 1:N:0:GAACCTAG+TCCGCATA  
CTCAATGCCGAGAGGGATGTAGAGGGCGAGAGAGAGCGACTTCTCTCGGGCCACAGCCTTACAGCTG  
TGGAGCACGGTATCCTCTGCCGAAACAGAGGTTGGACAAGACCGGAGGGGTCTCCTAGTTCCAAAGGA  
+  
FFFFFFFFFFFFFF:FFFFFFFFFFFFFFFFFFFFFFFFFFFFFFFFFFFFFFFFFFFFFFFFFFFFFFFF  
FFFFFFFFFFFFFFFFFFFFFFFFFFFFFFFFFFFFFFFFFFFFFFFFFFFFFFFFFFFFFFFFFFFFFFFF  
@A00155:342:HHGFNDSXY:1:2357:28058:34522 1:N:0:GAACCTAG+TCCGCATA  
GTCATCTCAATGCCGAGAGGGATGTAGAGGGCGAGAGAGAGCGACTTCTCTCGGGCCACAGCCTTAC  
AGCTGTGGAGCACGGTATCCTCTGCCGAAACAGAGGTTGGACAAGACCGGAGGGGTCTCC  
+  
FFFFFFFFFFFFFFFFFFFFFFFFFFFFFFFFFFFFFFFFFFFFFFFFFFFFFFFFFFFFFFFFFFFFFFFF  
FFFFFFFFFFFFFFFFFFFFFFFFFFFFFFFFFFFFFFFFFFFFFFFFFFFFFFFFFFFFFFFFFFFFFFFF  
@A00155:342:HHGFNDSXY:1:2358:31168:6277 1:N:0:GAACCTAG+TCCGCATA  
GTGTGGCGGGGCATGGGTTTGAACCCCATGACGGTCGGAGTCTAGTAGGCTCCCTGATGAGTCCGTT  
CCAAGGACGAAACCGTCGTTACTCTTTGAGTTGTGTAAGTTTCGTCCTAAAAAGGACTCGTCAGGTAG  
+

FFFF:FFFFFFFFFFFFFFFFFFFFFFFFFFFFFFFFFFFFFFFFFFFFFFFFFFFFFFFFFFFFFFFFFFFFF  
FFFFFFFFFFFFFFFFFFFFFFFF:FFFFF:FFFFF:FFFFFFFFFFFFF::FFFFF:FFFFFFFFFFFF:F  
@A00155:342:HHGFNDSXY:1:2358:15745:6903 1:N:0:GAACCTAG+TCCGCATA  
GGATGTGGAGGGCGAGAGAGAGCGACTTCTCTCGGGCCACAGCCTTACAGCTGTGGAGCACGGTATC  
CTCTGCCGAAACAGAGGTTGGACAAGACCGGAGGGGTCTCCTGGTTCCAAAGGAGATGTACTCC  
+  
FFFFFFFFFFFFFFFFFFFFFFFFFFFFFFFFFFFFFFFFFFFFFFFFFFFFFFFFFFFFFFFFFFFFF:FFFFFFFFFFFFFFFFFFFFF  
FFFFFFFFFFFFF:FFFFFFFFFFFFFFFFFFFFFFFFFFFFFFFFFFFFFFFFFFFFF:FF:FFFFFFFFFFFFFFFFFFFFF  
@A00155:342:HHGFNDSXY:1:2358:24786:7560 1:N:0:GAACCTAG+TCCGCATA  
GGGCGAGAGAGAGCGACTTCTCTCGGGCCACAGCCTTACAGCTGTGGAGCACGGTATCCTCTGCCGA  
AACAGAGGTTGGACAAGACCGGAGGGGTCTCCTAGTTCCAAAGGAGATGTACTCCGGGCTTGTTACAG  
+  
FFFFFFFFFFFFFFFFFFFFFFFFFFFFFFFFFFFFFFFFFFFFFFFFFFFFFFFFFFFFFFFFFFFFF  
FFFFFFFFFFFFFFFFFFFFFFFFFFFFFFFFFFFFFFFFFFFFFFFFFFFFFFFFFFFFFFFFFFFFF  
@A00155:342:HHGFNDSXY:1:2358:16486:26287 1:N:0:GAACCTAG+TCCGCATA  
GAGAGGGATGTGGAGGGCGAGAGAGAGCGACTTCTCTCGGGCCACAGCCTTACAGCTGTGGAGCACG  
GTATCCTCTGCCGAAACAGAGGTTGGACAAGACCGGAGGGGTCTCCTAGTTCCAAAGGAGATGTACTC  
+  
FFFFFFFFFFFF:FFFFFFFFFFFFFFFFFFFFFFFFFFFFFFFFFFFFFFFFFFFFFFFFFFFFFFFFFFFFF  
FFFFFFFFFFFFFFFFFFFFFFFFFFFFFFFFFFFFFFFFFFFFF:FFFFFFFFFFFFFFFFFFFFFFFFFFFFF:FFFFF  
@A00155:342:HHGFNDSXY:1:2358:30300:29700 1:N:0:GAACCTAG+TCCGCATA  
CTCTGGCCTATGGTCATCTCAATGCCGAGAGGGATGTGAAGGGCGAGAGAGAGCGACTTCTCTCGGGC  
CCACAGCCTTACAGCTGTGGAGCACGGTATCCTCTGCCGAAACAGAGGTTGGACAAGACCGG  
+  
FFFFFFFFFFFFFFFFFFFFFFFFFFFFF::FFFFFFFFFFFFFFFFFFFF:FFFFFFFFFFFFFFFFFFFFFFFFFFFFF  
FFFFFFFFFFFFFFFFFFFFFFFFFFFFFFFFFFFFFFFFFFFFFFFFFFFFFFFFFFFFFFFFFFFFF  
@A00155:342:HHGFNDSXY:1:2359:10737:6903 1:N:0:GAACCTAG+TCCGCATA  
GTGTCCACTTAAGGACTCACCTCTGGCCTATGGTCATCTCAATGCCGAGAGGGATGTAGAGGGCGAGA  
GAGAGCGACTTCTCTCGGGCCACAGCCTTACAGCTGTGGAGCACGGTATCCTCTGCCGAAACAGAG  
+  
F:FFFFFFF,FFFFFF,FFFFFFFFFFFFFFFFFFFFFFFFFFFFFFFFFFFFFFFFFFFFF:FFFFFFF:FFFFFFF,FFFFF  
FFFF:FFFFFFFFFFFFFFFFFFFFF:FFF:FF:F:F,F:FFFFFFFFFFFFF,FFF:FFFFFFF  
@A00155:342:HHGFNDSXY:1:2359:2663:11992 1:N:0:GAACCTAG+TCCGCATA  
ATCTCAATGCCGAGAGGGATGTAGAGGGCGAGAGAGAGCGACTTCTCTCGGGCCACAGCCTTACAGC  
TGTGGAGCACGGTATCCTCTGCCGAAACAGAGGTTGGACAAGACCGGAGGGGTCTCCTAGTTCCAAAG  
+  
FFFFFFFFFFFFFFFFFFFF:FFFF,FF:FFFFFFFFFFFFFFFFFFFFFFFFFFFFFFFFFFFFFFFFFFFFF  
FFFFFFFFFFFFFFFFFFFFFFFFFFFFFFFFFFFFFFFFFFFFF,FFFFFFFFFFFFFFFFFFFFFFFFFFFFF  
@A00155:342:HHGFNDSXY:1:2359:2492:24032 1:N:0:GAACCTAG+TCCGCATA  
AGAGAGAGCGACTTCTCTCGGGCCACAGCCTTACAGCTGTGGAGCACGGTATCCTCTGCCGAAACAG  
AGGTTGGACAAGACCGGAGGGGTCTCCTAGTTCCAAAGGAGATGTACTCCGGGCTTGTTACGACCT  
+  
FFFFFFFFFFFFFFFFFFFFFFFFFFFFFFFFFFFFFFFFFFFFF:FFFFFFFFFFFFFFFFFFFFF:FFFFFFFFF  
FFFFFFFFFFFFF:FFFFFFFFFFFFFFFFFFFFFFFFFFFFFFFFFFFFFFFFFFFFF:F:FFFFFFFFFFFF:FFFF  
@A00155:342:HHGFNDSXY:1:2359:22761:32800 1:N:0:GAACCTAG+TCCGCATA  
CTTCTCTCGGGCCACAGCCTTACAGCTGTGGAGCACGGTATCCTCTGCCGAAACAGAGGTTGGACAA  
GACCGGAGGGGTCTCTTAGTTCCAAAGGAGATGTACTCCGGGCTTGTTACGACCTACCGTGTAAGTC  
+  
FFFFFFFFFFFFFFFFFFFFFFFFFFFFFFFFFFFFFFFFFFFFFFFFFFFFFFFFFFFFFFFFFFFFF  
:FFFFFFFFFFFFFFFFFFFFFFFFFFFFFFFFFFFFFFFFFFFFFFFFFFFFFFFFFFFFFFFFFFFFF  
@A00155:342:HHGFNDSXY:1:2360:29966:3349 1:N:0:GAACCTAG+TCCGCATA  
GAGCGACTTCTCTCGGGCCACAGCCTTACAGCTGTGGAGCACGGTATCCTCTGCCGAAACAGAGGTT  
GGACAAGACCGGAGGGTCTCCTAGTTCCAAAGGAGATGTACTCCGGGCTTGTTACGACCTACCGTG  
+



FFFFFFFFFFFFFFFFFFFFFFFFFFFFFFFFFFFFFFFFFFFFFFFFFFFFFFFFFFFFFFFFFFFFFFFFFFFFFFFF  
FFFFFFFFFFFFFFFFFFFFFFFFFFFFFFFFFFFFFFFFFFFFFFFFFFFFFFFFFFFFFFFFFFFFFFFFFFFFFFFF:F  
@A00155:342:HHGFNDSXY:1:2360:26729:11240 1:N:0:GAACCTAG+TCCGCATA  
GAGCGACTTCTCTCGGGCCCACAGCCTTACAGCTGTGGAGCACGGTATCCTCTGCCGAAACAGAGGTT  
GGACAAGACCGGAGGGGTCTCCTGGTTCCAAAGGAGATGTACTCCGGGCTTGTTACGACCTACCGTG  
+  
FFFFFFFFFFFFFFFFFFFFFFFFFFFFFFFFFFFFFFFFFFFFFFFFFFFFFFFFFFFFFFFFFFFFFFFFFFFFFFFF:F  
FFFFFFFFFFFFFFFFFFFFFFFFFFFFFFFFFFFFFFFFFFFFFFFFFFFFFFFFFFFFFFFFFFFFFFFFFFFFFFFF  
@A00155:342:HHGFNDSXY:1:2360:21658:24064 1:N:0:GAACCTAG+TCCGCATA  
ATGCCGAGAGGGATGTGGAGGGCGAGAGAGAGCGACTTCTCTCGGGCCCACAGCCTTACAGCTGTGGA  
GCACGGTATCCTCTGCCGAAACAGAGGTTGGACAAGACCGGAGGGGTCTCCTAGTTCCAAAGGAGATG  
+  
FFFFFFFFFFFFFFFFFFFFFFFFFFFFFFFFFFFFFFFFFFFFFFFFFFFFFFFFFFFFFFFFFFFFFFFFFFFFFFFF  
FFFFFFFFFFFFFFFFFFFFFFFFFFFFFFFFFFFFFFFFFFFFFFFFFFFFFFFFFFFFFFFFFFFFFFFFFFFFFFFF  
@A00155:342:HHGFNDSXY:1:2360:29704:26506 1:N:0:GAACCTAG+TCCGCATA  
TGGTCATCTCAATGCCGAGAGGGATGTGGAGGGCGAGAGAGAGCGACTTCTCTCGGGCCCACAGCCTT  
ACAGCTGTGGAGCACGGTATCCTCTGCCGAAACAGAGGTTGGACAAGACCGGAGGGGTCTCCTAGTTC  
+  
FFFFFFFFFFFFFFFF:F  
FFFFFFFFFFFFFFFFFFFFFFFFFFFFFFFFFFFFFFFFFFFFFFFFFFFFFFFFFFFFFFFFFFFFFFFFFFFFFFFF  
@A00155:342:HHGFNDSXY:1:2361:13711:11240 1:N:0:GAACCTAG+TCCGCATA  
ACCTCTGTTTTCGGCAGAGGATACCGTGCTCCACAGCTGTAAGGCTGTGGGCCCCGAGAGAAGTCGCTCT  
CTCTCGCCCTTCACATCCCTCTCGGCATTGAGATGACCATAGGCCAGAGGTGAGTCCTTAAGTGGACA  
+  
FFFFFFFFFFFFFFFF:F  
FFFFFFFFFFFFFFFFFFFFFFFFFFFFFFFFFFFFFFFFFFFFFFFFFFFFFFFFFFFFFFFFFFFFFFFFFFFFFFFF  
@A00155:342:HHGFNDSXY:1:2361:19361:30170 1:N:0:GAACCTAG+TCCGCATA  
TGTGGAGGGCGAGAGAGAGCGACTTCTCTCGGGCCCACAGCCTTACAGCTGTGGAGCACGGTATCCTC  
TGCCGAAACAGAGGTTGGACAAGACCGGAGGGGTCTCCTAGTTCCAAAGGAGATGTACTCCGGGCTTG  
+  
:FFFFFFFFFFFFFFFFFFFFFFFFFFFFFFFFFFFFFFFFFFFFFFFFFFFFFFFFFFFFFFFFFFFFFFFFFFFFFFFF  
FFFFFFFFFFFFFFFFFFFFFFFFFFFFFFFFFFFFFFFFFFFFFFFFFFFFFFFFFFFFFFFFFFFFFFFFFFFFFFFF  
@A00155:342:HHGFNDSXY:1:2361:13621:31469 1:N:0:GAACCTAG+TCCGCATA  
AGCCTTACAGCTGTGGAGCACGGTATCCTCTGCCGAAACAGAGGTTGGACAAGACCGGAGGGGTCTCC  
TAGTTCCAAAGGAGATGTACTCCGGGCTTGTTACGACCTACCGTGTAAGTCGTAGTCTAGTAGGCTA  
+  
FFFFFFFFFFFFFFFFFFFFFFFFFFFFFFFFFFFFFFFFFFFFFFFFFFFFFFFFFFFFFFFFFFFFFFFFFFFFFFFF  
FFFFFFFFFFFFFFFFFFFFFFFFFFFFFFFFFFFFFFFFFFFFFFFFFFFFFFFFFFFFFFFFFFFFFFFFFFFFFFFF  
@A00155:342:HHGFNDSXY:1:2361:31801:37027 1:N:0:GAACCTAG+TCCGCATA  
TCTCTCGCCCTCCACATCCCTCTCGGCATTGAGATGACCATAGGCCAGAGGTGAGTCCTTAAGTGGAC  
ACAGCTGATCTAAGGCGGTGTGGCGGGCATGGGTTTGAACCCCATGACGGTCGGAGTCTAGTAGGC  
+  
FFFF:FFFFFFFF:F  
F:FF:FFFFFFFF:F  
@A00155:342:HHGFNDSXY:1:2362:20518:1767 1:N:0:GAACCTAG+TCCGCATA  
CGTCCATAAAAGGACTCGTCAGGTAGCCTACTAGACTACGACTTACACGGTAGGTCTGAACAAGCCC  
GGAGTACATCTCCTTTGGAAGTAGGAGACCCCTCCGGTCTTGTTCAACCTCTGTTTCGGCAGAGGATA  
+  
FFFFFFFFFFFFFFFFFFFFFFFFFFFFFFFFFFFFFFFFFFFFFFFFFFFFFFFFFFFFFFFFFFFFFFFFFFFFFFFF  
FFFFFFFFFFFFFFFFFFFFFFFFFFFFFFFFFFFFFFFFFFFFFFFFFFFFFFFFFFFFFFFFFFFFFFFFFFFFFFFF  
@A00155:342:HHGFNDSXY:1:2362:32253:25254 1:N:0:GAACCTAG+TCCGCATA  
CGAGAGGGATGTGGAGGGCGAGAGAGAGCGACTTCTCTCGGGCCCACAGCCTTACAGCTGTGGAGCAC  
GGTATCCTCTGCCGAAACAGAGGTTGGACAAGACCGGAGGGGTCTCCTAGTTCCAAAGGAGATGTACT  
+

FFFF,FFFFFFFFFFFFFFFF:FFFF:FF:FFFF:FFFFFFFFFFFFFFFFFFFFFFFFFFFFFFFFFFFF  
FFF:FFFF:FFFFFFFFFFFFFFFFFFFFFFFFFFFF,FFFFFFFFFFFFFFFFFFFFFFFFFFFF:FFFFFFFFFFFF  
@A00155:342:HHGFNDSXY:1:2362:6515:34162 1:N:0:GAACCTAG+TCCGCATA  
GGATGTAGAGGGCGAGAGAGAGCGACTTCTCTCGGGCCACAGCCTTACAGCTGTGGAGCACGGTATC  
CTCTGCCGAAACAGAGGTTGGACAAGACCGGAGGGGTCTCCTAGTTCCAAAGGAGATGTACTCC  
+  
FFFFFFFFFFFFFFFFFFFFFFFFFFFFFFFFFFFFFFFFFFFFFFFFFFFFFFFFFFFFFFFFFFFF,F:FFFF  
FFF:F:FFFFFFFFFFFF:FFFFFFFFFFFFFFFF:FFF:FFFFFFFFFFFFFFFF:FFFFFFFFFFFF  
@A00155:342:HHGFNDSXY:1:2362:6506:34178 1:N:0:GAACCTAG+TCCGCATA  
GGATGTAGAGGGCGAGAGAGAGCGACTTCTCTCGGGCCACAGCCTTACAGCTGTGGAGCACGGTATC  
CTCTGCCGAAACAGAGGTTGGACAAGACCGGAGGGGTCTCCTAGTTCCAAAGGAGATGTACTCC  
+  
FFFFFFFFFFFFFFFFFFFFFFFFFFFFFFFFFFFFFFFFFFFFFFFFFFFFFFFFFFFFFFFFFFFF:FFF:FFFFFFFFFFFF  
FFFFFFFFFFFFFFFFFFFFFFFFFFFFFFFFFFFFFFFFFFFFFFFFFFFFFFFFFFFFFFFFFFFF:FFFFF,FFFFFFFFFFFFFFFFFFFF  
@A00155:342:HHGFNDSXY:1:2362:31946:36871 1:N:0:GAACCTAG+TCCGCATA  
TTCTCTCGGGCCACAGCCTTACAGCTGTGGAGCACGGTATCCTCTGCCGAAACAGAGGTTGGACAAG  
ACCGGAGGGGTCTCCTAGTTCCAAAGGAGATGTACTCCGGGCTTGTTACGACCTACCGTGTAAGTCG  
+  
FFFFFFFFF:FFF:FF:FFF:FFFFFF:FF,:FF:FFFFFFFFFFFF:FFFFFFFF:FFF:FFFFFFF  
FFFF:::FF:FFFFFFFFFFFF:FFF:FF:FFFFFFFFF::F:FF,FF:F:FFFFFFFFF:F,:FFF  
@A00155:342:HHGFNDSXY:1:2363:16848:34178 1:N:0:GAACCTAG+TCCGCATA  
TACCGTGTAAGTCGTAGTCTAGTAGGCTACCTGACGAGTCCTTTTAGGACGAACTTACACAACCTCG  
AAGAGTAACGACGGTTTCGTCCTTGAACGGACTCATCAGGGAGCCTACTAGACTCCGACCGTCATGG  
+  
FFFFF,FFFFFFFFFFFFFFFFFFFFFFFFFFFFFFFFFFFFFFFFFFFFFFFFFFFFFFFFFFFF:FFF:FFFFFFFF:FF  
FFFFFFFFFFFFFFFFFFFFFFFFFFFFFFFFFFFFFFFFFFFFFFFFFFFFFFFFFFFFFFFFFFFF:FFF,FFFFFFFFFFFFFFFF:FF  
@A00155:342:HHGFNDSXY:1:2364:3712:8484 1:N:0:GAACCTAG+TCCGCATA  
GTCATCTCAATGCCGAGAGGGATGTGGTGGGCGAGAGAGAGCGACTTCTCTCGGGCCACAGCCTTAC  
AGCTGTGGAGCACGGTATCCTCTGCCGAAACAGAGGTTGGACAAGACCGGAGGGGTCTCCTAGTTCCA  
+  
FFFFFFFFFFFFFFFFFFFF:FFFFFFFFFFFFFFFFFFFFFFFFFFFFFFFFFFFF::FFFFFFFFFFFFFFFFFFFFFFFFFFFF  
FFFFFFFFFFFFFFFFFFFFFFFFFFFFFFFFFFFFFFFFFFFFFFFFFFFFFFFFFFFFFFFFFFFF:FFFFFF:  
@A00155:342:HHGFNDSXY:1:2364:32560:36025 1:N:0:GAACCTAG+TCCGCATA  
GGGCGAGAGAGAGCGACTTCTCTCGGGCCACAGCCTTACAGCTGTGGAGCACGGTATCCTCTGCCGA  
AACAGAGGTTGGACAAGACCGGAGGGGTCTCCTGGTTCCAAAGGAGATGTACTCCGGGCTTGTTACG  
+  
FFFFFFFFFFFFFFFFFFFF:FFFFFFFFFFFFFFFFFFFFFFFFFFFFFFFFFFFFFFFFFFFFFFFFFFFFFFFFFFFF  
FFFFFFFFFFFF,FFFFFFFFFFFFFFFFFFFF,FFFFFFFFFFFFFFFFFFFFFFFFFFFFFFFFFFFF  
@A00155:342:HHGFNDSXY:1:2365:15501:1564 1:N:0:GAACCTAG+TCCGCATA  
GAGAGGGATGTAGAGGGCGAGAGAGAGCGACTTCTCTCGGGCCACAGCCTTACAGCTGTGGAGCACG  
GTATCCTCTGCCGAAACAGAGGTTGGACAAGACCGGAGGGGTCTCCTAGTTCCAAAGGAGATGTACTC  
+  
FFFFFFFFFFFFFFFFFFFFFFFFFFFFFFFFFFFFFFFFFFFFFFFFFFFFFFFFFFFFFFFFFFFF  
FFFFFFFFFFFFFFFFFFFFFFFFFFFFFFFFFFFFFFFFFFFFFFFFFFFFFFFFFFFFFFFFFFFF:FFFFFFFFFFFFFFFFFFFFFFFFFFFF  
@A00155:342:HHGFNDSXY:1:2365:18186:13009 1:N:0:GAACCTAG+TCCGCATA  
TTAGATCAGCTGTGTCCACTTAAGGACTCACCTCTGGCCTATGGTCATCTCAATGCCGAGAGGGATGT  
AGAGGGCGAGAGAGAGCGACTTCTCTCGGGCCACAGCCTTACAGCTGTGGAGCACGGTATCCTCTGC  
+  
FFFFFFF:FFFFFFFFFFFFFFFFFFFFFFFFFFFFFFFFFFFFFFFFFFFFFFFFFFFFFFFFFFFF  
FFFFFFFFFFFFFFFFFFFFFFFFFFFFFFFFFFFFFFFFFFFFFFFFFFFFFFFFFFFFFFFFFFFF  
@A00155:342:HHGFNDSXY:1:2365:17526:16094 1:N:0:GAACCTAG+TCCGCATA  
TCTCTCGGGCCACAGCCTTACAGCTGTGGAGCACGGTATCCTCTGCCGAAACAGAGGTTGGACAAGA  
CCGGAGGGGTCTCCTGGTTCCAAAGGAGATGTACTCCGGGCTTGTTACGACCTACCGTGTAAGTCGT  
+

FFFFFFFFFFFFFFFFFFFFF, FFFFFFFFFFFFFFFFFFFFFFFFFFFFFFFFFFFFFFFFFFFFFFFFFFFFFFFF  
FFFFFFFFFFFFFFFFFFFFFFFFFFFFFFFFFFFFFFFFFFFFFFFFFFFFFFFFFFFFFFFFFFFFFFFFFFFFFFFF:  
@A00155:342:HHGFNDSXY:1:2365:7175:22842 1:N:0:GAACCTAG+TCCGCATA  
CTATGGTCATCTCAATGCCGAGAGGGATGTGGAGGGCGAGAGAGAGCGACTTCTCTCGGGCCCACAGC  
CTTACAGCTGTGGAGCACGGTATCCTCTGCCGAAACAGAGGTTGGACAAGACCGGAGGGGTCTCCTAG  
+  
FF: FFFFFFFFFFFFFFFFFFFFFFFFFFFFFFFFFFFFFFFFFFFFFFFFFFFFFFFFFFFFFFFFFFFFFFFFFF  
FFFFFFFFFFFFFFFFFFFFFFFFFFFFFFFFFFFFFFFFFFFFFFFFFFFFFFFFFFFFFFFFFFFFFFFFFFFFFFFF  
@A00155:342:HHGFNDSXY:1:2366:23827:4805 1:N:0:GAACCTAG+TCCGCATA  
GAGAGGGATGTGGAGGGCGAGAGAGAGCGACTTCTCTCGGGCCCACAGCCTTACAGCTGTGGAGCACG  
GTATCCTCTGCCGAAACAGAGGTTGGACAAGACCGGAGGGGTCTCCTAGTTCAAAGGAGATGTACTC  
+  
FFFFFFFFFFFFFFFFFFFFFFFFFFFFFFFFFFFFFFFFFFFFFFFFFFFFFFFFFFFFFFFFFFFFFFFFFFF:  
FFFFFFFFFFFFFFFFFFFFFFFFFFFFFFFFFFFFFFFFFFFFFFFFFFFFFFFFFFFFFFFFFFFFFFFFFFFFFFFF  
@A00155:342:HHGFNDSXY:1:2366:23267:12383 1:N:0:GAACCTAG+TCCGCATA  
ACTTCTCTCGGGCCCACAGCCTTACAGCTGTGGAGCACGGTATCCTCTGCCGAAACAGAGGTTGGACA  
AGACCGGAGGGGTCTCCTAGTTCAAAGGAGATGTACTCCGGGCTTGTTACGACCTACCGTGTAAGT  
+  
FFFFFFFFFFFFFFFFFFFFFFFFFFFFFFFFFFFFFFFFFFFFFFFFFFFFFFFFFFFFFFFFFFFFFFFFFFFF  
FFFFFFFFFFFFFFFFFFFFFFFFFFFFFFFFFFFFFFFFFFFFFFFFFFFFFFFFFFFFFFFFFFFFFFFFFFFF  
@A00155:342:HHGFNDSXY:1:2366:11180:17096 1:N:0:GAACCTAG+TCCGCATA  
AGAGAGAGTGACTTCTCTCGGGCCCACAGCCTTACAGCTGTGGAGCACGGTATCCTCTGCCGAAACAG  
AGGTTGGACAAGACCGGAGGGGTCTCCTAGTTCAAAGGAGATGTACTCCGGGCTTGTTACGACCTA  
+  
FFF: FFFFFFFFFFFFFFFFFFFFFFFFFFFFFFFFFFFFFFFFFFFFFFFFFFFFFFFFFFFFFFFFFFFFFF  
FFFFFFFFFFFF: FFFFFFFFFFFFFFFFFFFFFFFFFFFFFFFFFFFFFFFFFFFFFFFFFFFFFFFFFFFFFF  
@A00155:342:HHGFNDSXY:1:2366:20636:23672 1:N:0:GAACCTAG+TCCGCATA  
GAGAGCGACTTCTCTCGGGCCCACAGCCTTACAGCTGTGGAGCACGGTATCCTCTGCCGAAACAGAGG  
TTGGACAAGACCGGAGGGGTCTCCTAGTTCAAAGGAGATGTACTCCGGGCTTGTTACGACCTACCG  
+  
FFFFFFFFFFFFFFFFFFFFFFFFFFFFFFFFFFFFFFFFFFFFFFFFFFFFFFFFFFFFFFFFFFFFFFFFFFFF  
FFFFFFFFFFFFFFFFFFFFFFFFFFFFFFFFFFFFFFFFFFFFFFFFFFFFFFFFFFFFFFFFFFFFFFFFFFFF:  
@A00155:342:HHGFNDSXY:1:2366:25889:26757 1:N:0:GAACCTAG+TCCGCATA  
AGAGAGAGCGACTTCTCTCGGGCCCACAGCCTTACAGCTGTGGAGCACGGTATCCTCTGCCGAAACAG  
AGGTTGGACAAGACCGGAGGGGTCTCCTGTTCAAAGGAGATGTACTCCGGGCTTGTTACG  
+  
FFFFFFFFFFFFFFFFFFFFFFFFFFFFFFFFFFFFFFFFFFFFFFFFFFFFFFFFFFFFFFFFFFFFFFFFFFFF  
FFFFFFFFFFFFFFFFFFFFFFFFFFFFFFFFFFFFFFFFFFFFFFFFFFFFFFFFFFFFFFFFFFFFFFFFFFFF  
@A00155:342:HHGFNDSXY:1:2366:26124:27320 1:N:0:GAACCTAG+TCCGCATA  
AGAGAGAGCGACTTCTCTCGGGCCCACAGCCTTACAGCTGTGGAGCACGGTATCCTCTGCCGAAACAG  
AGGTTGGACAAGACCGGAGGGGTCTCCTGTTCAAAGGAGATGTACTCCGGGCTTGTTACG  
+  
FFFFFFFFFFFFFFFFFFFFFFFFFFFFFFFFFFFFFFFFFFFFFFFFFFFFFFFFFFFFFFFFFFFFFFFFFFFF  
FFFFFFFFFFFFFFFFFFFFFFFFFFFFFFFFFFFFFFFFFFFFFFFFFFFFFFFFFFFFFFFFFFFFFFFFFFFF  
@A00155:342:HHGFNDSXY:1:2366:1542:28526 1:N:0:GAACCTAG+TCCGCATA  
TTAGATCAGCTGTGTCCACTTAAGGACTCACCTCTGGCCTATGGTCATCTCAATGCCGAGAGGGATGT  
AGAGGGCGAGAGAGAGCGACTTCTCTCGGGCCCACAGCCTTACAGCTGTGGAGCACGGTATCCTCT  
+  
: FFF: FFFFFFFFFF: FFFF: FFF: FFFFFFFF: FFFFFFFFFFFFFFFFFFFFFF: FFFFFFFFFFFFFF  
FF:, FFFF, FFFFFFFFFFFFFFFFFFFFFFFFFFFFFFFFFFFFFFFFFFFFFFFFFFFFFFFFFFFFFF  
@A00155:342:HHGFNDSXY:1:2366:2835:29700 1:N:0:GAACCTAG+TCCGCATA  
TTAGATCAGCTGTGTCCACTTAAGGACTCACCTCTGGCCTATGGTCATCTCAATGCCGAGAGGGATGT  
AGAGGGCGAGAGAGAGCGACTTCTCTCGGGCCCACAGCCTTACAGCTGTGGAGCACGGTATCCTCT

+

FFFFFFFFFFFFFFFF: :FFF:FFFFFFFFFFFFFFFFFFFFFFFFFFFFFFFFFFFFFFFFFFFFFFFF  
FFFFFFFFFFFFFFFFFFFFFFFFFFFFFFFFFFFFFFFFFFFFFFFFFFFFFFFFFFFFFFFFFFFFFFFF  
@A00155:342:HHGFNDSXY:1:2366:24406:32268 1:N:0:GAACCTAG+TCCGCATA  
GAGAGGGATGTAGAGGGCGAGAGAGAGCGACTTCTCTCGGGCCACAGCCTTACAGCTGTGGAGCACG  
GTATCCTCTGCCGAAACAGAGGTTGGACAAGACCGGAGGGGTCTCCTAGTTCCAAAGGAGATGTACTC  
+  
FFFFFFFFFFFFFFFFFFFFFFFFFFFFFFFFFFFFFFFFFFFFFFFFFFFFFFFFFFFFFFFFFFFFFFFF  
FFFFFFFFFFFFFFFFFFFFFFFFFFFFFFFFFFFFFFFFFFFFFFFFFFFFFFFFFFFFFFFFFFFFFFFF  
@A00155:342:HHGFNDSXY:1:2366:26928:34538 1:N:0:GAACCTAG+TCCGCATA  
AGCGACTTCTCTCGGGCCACAGCCTTACAGCTGTGGAGCACGGTATCCTCTGCCGAAACAGAGGTTG  
GACAAGACCGGAGGGGTCTCCTAGTTCCAAAGGAGATGTACTCCGGGCTTGTTACGACCTACCGTGT  
+  
FFFFFFFFFFFFFFFFFFFFFFFFFFFFFFFFFFFFFFFFFFFFFFFFFFFFFFFFFFFFFFFFFFFFFFFF  
FFFFFFFFFFFFFFFFFFFFFFFFFFFFFFFFFFFFFFFFFFFFFFFFFFFFFFFFFFFFFFFFFFFFFFFF  
@A00155:342:HHGFNDSXY:1:2366:25292:35556 1:N:0:GAACCTAG+TCCGCATA  
GACTTCTCTCGGGCCACAGCCTTACAGCTGTGGAGCACGGTATCCTCTGCCGAAACAGAGGTTGGAC  
AAGACCGGAGGGGTCTCCTAGTTCCAAAGGAGATGTACTCCGGGCTTGTTACGACCTACCGTGT  
+  
FFFFFFFFFFFFFFFFFFFFFFFFFFFFFFFFFFFFFFFFFFFFFFFFFFFFFFFFFFFFFFFFFFFFFFFF  
FFFFFFFFFFFFFFFFFFFFFFFFFFFFFFFFFFFFFFFFFFFFFFFFFFFFFFFFFFFFFFFFFFFFFFFF  
@A00155:342:HHGFNDSXY:1:2368:23122:1892 1:N:0:GAACCTAG+TCCGCATA  
TCCTCTGCCGAAACAGAGGTTGGACAAGACCGGAGGGGTCTCCTGGTTCCAAAGGAGATGTACTCCGG  
GCTTGTTACGACCTACCGTGTAAGTCGTAGTCTAGTAGGCTACCTGACGAGTCCTTTTAGGACGAA  
+  
FFFFFFFFFFFFFFFFFFFFFFFFFFFFFFFFFFFFFFFFFFFFFFFFFFFFFFFFFFFFFFFFFFFFFFFF  
FFF:FFFFFFFFFFFFFFFFFFFFFFFFFFFFFFFFFFFFFFFFFFFFFFFFFFFFFFFFFFFFFFFFFFFF  
@A00155:342:HHGFNDSXY:1:2368:29740:4554 1:N:0:GAACCTAG+TCCGCATA  
AGGTGCTGAACAAGCCCGAGTACATCTCCTTTGGAACCAGGAGACCCCTCCGGTCTTGTCCAACCTC  
TGTTTCGGCAGAGGATACCGTGCTCCACAGCTGTAAGGCTGTGGGCCCGAGAGAAGTCGCTCTCTCTC  
+  
FFFFFFFFFFFFFFFFFFFFFFFFFFFFFFFFFFFFFFFFFFFFFFFFFFFFFFFFFFFFFFFFFFFFFFFF  
FFFFFFFFFFFFFFFFFFFFFFFFFFFFFFFFFFFFFFFFFFFFFFFFFFFFFFFFFFFFFFFFFFFFFFFF  
@A00155:342:HHGFNDSXY:1:2368:19551:14747 1:N:0:GAACCTAG+TCCGCATA  
TTACAGCTGTGGAGCACGGTATCCTCTGCCGAAACAGAGGTTGGACAAGACCGGAGGGGTCTCCTAGT  
TCCAAAGGAGATGTACTCCGGGCTTGTTACGACCTACCGTGTAAGTCGTAGTCTAGTAGGCTACCTG  
+  
FFFFFFFFFFFFFFFFFFFFFFFFFFFFFFFFFFFFFFFFFFFFFFFFFFFFFFFFFFFFFFFFFFFFFFFF  
FFFFFFFFFFFFFFFFFFFFFFFFFFFFFFFFFFFFFFFFFFFFFFFFFFFFFFFFFFFFFFFFFFFFFFFF  
@A00155:342:HHGFNDSXY:1:2368:18502:16344 1:N:0:GAACCTAG+TCCGCATA  
TTACAGCTGTGGAGCACGGTATCCTCTGCCGAAACAGAGGTTGGACAAGACCGGAGGGGTCTCCTAGT  
TCCAAAGGAGATGTACTCCGGGCTTGTTACGACCTACCGTGTAAGTCGTAGTCTAGTAGGCTACCTG  
+  
FFFFFFFFFFFFFFFFFFFFFFFFFFFFFFFFFFFFFFFFFFFFFFFFFFFFFFFFFFFFFFFFFFFFFFFF  
FFFFFFFFFFFFFFFFFFFFFFFFFFFFFFFFFFFFFFFFFFFFFFFFFFFFFFFFFFFFFFFFFFFFFFFF  
@A00155:342:HHGFNDSXY:1:2368:21323:16783 1:N:0:GAACCTAG+TCCGCATA  
GAGAGGGATGTGGAGGGCGAGAGAGAGCGACTTCTCTCGGGCCACAGCCTTACAGCTGTGGAGCACG  
GTATCCTCTGCCGAAACAGAGGTTGGACAAGACCGGAGGGGTCTCCTAGTTCCAAAGGAGATGTACTC  
+  
FFFFFFFFFFFFFFFFFFFFFFFFFFFFFFFFFFFFFFFFFFFFFFFFFFFFFFFFFFFFFFFFFFFFFFFF  
FFFFFFFFFFFFFFFFFFFFFFFFFFFFFFFFFFFFFFFFFFFFFFFFFFFFFFFFFFFFFFFFFFFFFFFF  
@A00155:342:HHGFNDSXY:1:2368:19551:23766 1:N:0:GAACCTAG+TCCGCATA  
TTACAGCTGTGGAGCACGGTATCCTCTGCCGAAACAGAGGTTGGACAAGACCGGAGGGGTCTCCTAGT  
TCCAAAGGAGATGTACTCCGGGCTTGTTACGACCTACCGTGTAAGTCGTAGTCTAGTAGGCTACCTG  
+

FFFFFFFFFFFFFFFFFFFFFFFFFFFFFFFFFFFFFFFFFFFFFFFFFFFFFFFFFFFFFFFFFFFFFFFFFFFF:FFFFFFFF  
@A00155:342:HHGFNDSXY:1:2369:31693:7122 1:N:0:GAACCTAG+TCCGCATA  
CCTTACAGCTGTGGAGCACGGTATCCTCTGCCGAAACAGAGGTTGGACAAGACCGGAGGGGTCTCCTA  
GTTCAAAGGAGATGTACTCCGGGCTTGTTACGACCTACCGTGTAAGTCGTAGTCTAGTAGGCTACC  
+  
FF:FFFFFFFFFFFFFFFFFFFFFFFFFFFFFFFFFFFFFFFFFFFFFFFFFFFFFFFFFFFFFFFFFFFFF:FFFFFFF  
FFFFFFFFFFFFFFFFFFFFFFFFFFFFFFFFFFFFFFFFFFFFFFFFFFFFFFFFFFFFFFFFFFFFFFFF,FFFFFFFFFFFFFFFFFFFFFFFFF  
@A00155:342:HHGFNDSXY:1:2369:4933:8938 1:N:0:GAACCTAG+TCCGCATA  
TGTCCTACTTAAGGACTCTCCTCTGGCCTATGGTCATCTCAATGCCGAGAGGGATGTGGAGGGCGAGAG  
AGAGCGACTTCTCTCGGGCCCACAGCCTTACAGCTGTGGAGCACGGTATCCTCTGCCGAAACAGAGGT  
+  
FFFFFFFFFFFFFFFFFFFFFFFFFFFFFFFFFFFFFFFFFFFFFFFFFFFFFFFFFFFFFFFFFFFFFFFF:FFFFFFFFFFFFFFFFFFFFF  
FFFFFFFFFFFFFFFFFFFFFFFFFFFFFFFFFFFFFFFFFFFFFFFFFFFFFFFFFFFFFFFFFFFFFFFF:FFFFFF:FFFFFF::FFFFFFFFFFFF:FFFFFFFFFFFFF  
@A00155:342:HHGFNDSXY:1:2369:28185:14794 1:N:0:GAACCTAG+TCCGCATA  
CTCTCGGGCCCACAGCCTTACAGCTGTGGAGCACGATATCCTCTGCCGAAACAGAGGTTGGACAAGAC  
CGGAGGGGTCTCCTAGTTCAAAGGAGATGTACTCCGGGCTTGTTACGACCTACCGTGTAAGTCGTA  
+  
FF:FFFFFFFFFFFFFFFFFFFFFFFFFFFFFFFFFFFFFFFFFFFFFFFFFFFFFFFFFFFFFFFFFFFFFFFFF  
FFFFFFFFFFFFFFFFFFFFFFFFFFFFFFFFFFFFFFFFFFFFFFFFFFFFFFFFFFFFFFFFFFFFFFFF:FFFFFFFFFFFFFF:FFFFFF  
@A00155:342:HHGFNDSXY:1:2369:25997:23406 1:N:0:GAACCTAG+TCCGCATA  
CACCTCTGGCCTATGGTCATCTCAATGCCGAGAGGGATGTGGAGGGCGAGAGAGAGCGACTTCTCTCG  
GGCCCACAGCCTTACAGCTGTGGAGCACGGTATCCTCTGCCGAAACAGAGGTTGGACAAGACCGGAGG  
+  
FFFFFFFFFFFFFFFFFFFFFFFFFFFFFFFFFFFFFFFFFFFFFFFFFFFFFFFFFFFFFFFFFFFFFFFFF  
FFFFFFFFFFFFFFFFFFFFFFFFFFFFFFFFFFFFFFFFFFFFFFFFFFFFFFFFFFFFFFFFFFFFFFFFF  
@A00155:342:HHGFNDSXY:1:2370:31738:15718 1:N:0:GAACCTAG+TCCGCATA  
AAGGACTCACCTCTGGCCTATGGTCATCTCAATGCCGAGAGGGATGTGAAGGGCGAGAGAGAGCGACT  
TCTCTCGGGCCCACAGCCTTACAGCTGTGGAGCACGGTATCCTCTGCCGAAACAGAGGTTGGACAAGA  
+  
:FFFFFFFFFFFFFFFFFFFFFFFFFFFFFFFFFFFFFFFFFFFFFFFFFFFFFFFFFFFFFFFFFFFFFFFFF  
FFFFFFFFFFFFFFFFFFFFFFFFFFFFFFFFFFFFFFFFFFFFFFFFFFFFFFFFFFFFFFFFFFFFFFFFF:FFFFFFFFFFFFFFFFFFFF  
@A00155:342:HHGFNDSXY:1:2370:32759:20838 1:N:0:GAACCTAG+TCCGCATA  
CGACTTCTCTCGGGCCCACAGCCTTACAGCTGTGGAGGACGGTATCCTCTGCCGAAACAGAGGTTGGA  
CAAGACCGGAGGGGTCTCCTAGTTCAAAGGAGATGTACTCCGGGCTTGTTACGACCTACCGTGTA  
+  
FFFFFFFFFFFFFFFFFFFFFFFFFFFFFFFFFFFFFFFFFFFFFFFFFFFFFFFFFFFFFFFFFFFFFFFFF  
FFFFFFFFFFFFFFFFFFFFFFFFFFFFFFFFFFFFFFFFFFFFFFFFFFFFFFFFFFFFFFFFFFFFFFFFF:FFFF  
@A00155:342:HHGFNDSXY:1:2370:1154:21465 1:N:0:GAACCTAG+TCCGCATA  
GTGTCCACTTAAGGACTCACCTCTGGCCTATGGTCATCTCTATGCCGAGAGGGATGTGGAGGGCGAGA  
GAGAGCGACTTCTCTCGGGCCCACAGCCTTACAGCTGTGGAGCACGGTATCCTCTGCCGAAACAGAGG  
+  
FFFFF:F:FF:FFFF:FF::FFFFFF,,FFFFFF:FFFFFFFFF:FF:FFFF:FFFFFFFFFFFFFFFFF:  
FFF:F::FFFFFFFFFFFFFF:FFFF:FFFFFFFFFFFFF,FFFFFFFFFFFFFFFFFF:FF::F,F:FF  
@A00155:342:HHGFNDSXY:1:2370:14036:33630 1:N:0:GAACCTAG+TCCGCATA  
GCTGTGTCCACTTAAGGACTCACCTCTGGCCTATGGTCATCTCAATGCCGAGAGGGATGTAGAGGGCG  
AGAGAGAGCGACTTCTCTCGGGCCCACAGCCTTACAGCTGTGGAGCACGGTATCCTCTGCCGAAACAG  
+  
FFFFFFFFFFFFFFFFFFFFFFFFFFFFFFFFFFFFFFFFFFFFFFFFFFFFFFFFFFFFFFFFFFFFFFFF:FFFFFFFFFFFFFFFFFFFFF  
FFFFFFFFFFFFFFFFFFFFFFFFFFFFFFFFFFFFFFFFFFFFFFFFFFFFFFFFFFFFFFFFFFFFFFFFF  
@A00155:342:HHGFNDSXY:1:2371:13946:1501 1:N:0:GAACCTAG+TCCGCATA  
GCTGTGTCCACTTAAGGACTCACCTCTGGCCTATGGTCATCTCAATGCCGAGAGGGATGTAGAGGGCG  
AGAGAGAGCGACTTCTCTCGGGCCCACAGCCTTACAGCTGTGGAGCACGGTATCCTCTGCCGAAACAG  
+

FFFFFFFFFFFFFFFFFFFFFFFFFFFFFFFFFFFFFFFFFFFFFFFFFFFFFFFFFFFFFFFF:FFFFFFFF  
FFFFFFFFFFFFFFFFFFFFFFFFFFFFFFFFFFFFFFFFFFFFFFFFFFFFFFFFFFFFFFFFFFFFFFFF  
@A00155:342:HHGFNDSXY:1:2371:5665:19539 1:N:0:GAACCTAG+TCCGCATA  
GTCATCTCAATGCCGAGAGGGATGTGGAGGGCGAGAGAGAGCGACTTCTCTCGGGCCCACAGCCTTAC  
AGCTGTGGAGCACGGTATCCTCTGCCGAAACAGAGGTTGGACAAGACCGGAGGGGTCTCTGGTTCCA  
+  
FFFFFFFFFFFFFFFFFFFFFFFFFFFFFFFFFFFFFFFFFFFFFFFFFFFFFFFFFFFFFFFFFFFFFFFF  
FFFFFFFFFFFFFFFFFFFFFFFFFFFFFFFFFFFFFFFFFFFFFFFFFFFFFFFFFFFFFFFFFFFFFFFF:  
@A00155:342:HHGFNDSXY:1:2371:12500:20760 1:N:0:GAACCTAG+TCCGCATA  
AGCGACTTCTCTCGGGCCCACAGCCTTACAGCTGTGGAGCACGGTATCCTCTGCCGAAACAGAGGTTG  
GACAAGACCGGAGGGGTCTCCTAGTTCCAAAGGAGATGTACTCCGGGCTTGTTACGACCTACCGTGT  
+  
FFFFFFFFFFFFFFFFFFFFFFFFFFFFFFFFFFFFFFFFFFFFFFFFFFFFFFFFFFFFFFFFFFFFFFFF:  
FFFFFFFFFFFFFFFFFFFFFFFFFFFFFFFFFFFFFFFFFFFFFFFFFFFFFFFFFFFFFFFFFFFFFFFF  
@A00155:342:HHGFNDSXY:1:2371:12518:20791 1:N:0:GAACCTAG+TCCGCATA  
AGCGACTTCTCTCGGGCCCACAGCCTTACAGCTGTGGAGCACGGTATCCTCTGCCGAAACAGAGGTTG  
GACAAGACCGGAGGGGTCTCCTAGTTCCAAAGGAGATGTACTCCGGGCTTGTTACGACCTACCGTGT  
+  
FFFFFFFFFFFFFFFFFFFFFFFFFFFFFFFFFFFFFFFFFFFFFFFFFFFFFFFFFFFFFFFFFFFFFFFF  
FFFFFFFFFFFFFFFFFFFFFFFFFFFFFFFFFFFFFFFFFFFFFFFFFFFFFFFFFFFFFFFFFFFFFFFF  
@A00155:342:HHGFNDSXY:1:2371:23213:23124 1:N:0:GAACCTAG+TCCGCATA  
TCTCAATGCCGAGAGGGATGTAGAGGGCGAGAGAGAGCGACTTCTCTCGGGCCCACAGCCTTACAGCT  
GTGGAGCACGGTATCCTCTGCCGAAACAGAGGTTGGACAAGACCGGAGGGGTCTCCTAGTTCCA  
+  
FFFFFFFFFFFFFFFFFFFFFFFFFFFFFFFFFFFFFFFFFFFFFFFFFFFFFFFFFFFFFFFFFFFFFFFF:  
FFFFFFFFFFFFFFFFFFFFFFFFFFFFFFFFFFFFFFFFFFFFFFFFFFFFFFFFFFFFFFFFFFFFFFFF:  
@A00155:342:HHGFNDSXY:1:2371:28736:28964 1:N:0:GAACCTAG+TCCGCATA  
CGAGAGAGAGCGACTTCTCTCGGGCCCACAGCCTTACAGCTGTGGAGCACGGTATCCTCTGCCGAAAC  
AGAGGTTGGACAAGACCGGAGGGGTCTCCTAGTTCCAAAGGAGATGTACTCCGGGCTTGTTACGACC  
+  
FFFFFFFFFFFFFFFFFFFFFFFFFFFFFFFFFFFFFFFFFFFFFFFFFFFFFFFFFFFFFFFFFFFFFFFF  
FFFFFFF:FFFFFFFFFFFFFFFFFFFFFFFFFFFFFFFFFFFFFFFFFFFFFFFFFFFFFFFFFFFFFFFF:  
@A00155:342:HHGFNDSXY:1:2372:10619:5760 1:N:0:GAACCTAG+TCCGCATA  
ACCTCTGTTTCGGCAGAGGATACCGTGCTCCACAGCTGTAAGGCTGTGGGCCCGAGAGAAGTCGCTCT  
CTCTCGCCCTTACATCCCTCTCGGCATTGAGATGACCATAGGCCAGAGGTGAGTCCTTAAGTGGACA  
+  
FFFFFFFFFFFFFFFFFFFFFFFFFFFFFFFFFFFFFFFFFFFFFFFFFFFFFFFFFFFFFFFFFFFFFFFF  
FFFFFFFFFFFFFFFFFFFFFFFFFFFFFFFFFFFFFFFFFFFFFFFFFFFFFFFFFFFFFFFFFFFFFFFF:  
@A00155:342:HHGFNDSXY:1:2372:3911:7169 1:N:0:GAACCTAG+TCCGCATA  
TGTAAGAGGGCGAGAGAGAGCGACTTCTCTCGGGCCCACAGCCTTACAGCTGTGGAGCACGGTATCCTC  
TGCCGAAACAGAGGTTGGACAAGACCGGAGGGGTCTCCTAGTTCCAAAGGAGATGTACTCCGGG  
+  
FF:FFFFFFFFFFFFFFFFFFFFFFFFFFFFFFFFFFFFFFFFFFFFFFFFFFFFFFFFFFFFFFFF:  
F:,FFFFFFFF:FFF:FF,FFFFFFFF:FFF:FFFFFFFF:FFFFFFFF:FFFFFFFF:FFFFFFFF  
@A00155:342:HHGFNDSXY:1:2372:15148:8469 1:N:0:GAACCTAG+TCCGCATA  
TTAGATCAGCTGTGTCCACTTAAGGACTCACCTCTGGCCTATGGTCATCTCAATGCCGAGAGGGATGT  
GGAGGGCGAGAGAGAGCGACTTCTCTCGGGCCCACAGCCTTACAGCTGTGGAGCACGGTATCCTCTGC  
+  
:FFFFFFFFFFFFFFFFFFFFFFFFFFFFFFFFFFFFFFFFFFFFFFFFFFFFFFFFFFFFFFFF:FF:FFFF  
F:FFFFFFFFFFFFFFFFFFFFFFFFFFFFFFFFFFFFFFFFFFFFFFFFFFFFFFFFFFFFFFFF,FFFFFFFF  
@A00155:342:HHGFNDSXY:1:2372:6542:16235 1:N:0:GAACCTAG+TCCGCATA  
AGGGCGAGAGAGAGCGACTTCTCTCGGGCCCACAGCCTTACAGCTGTGGAGCACGGTATCCTCTGCCG  
AAACAGAGGTTGGACAAGACCGGAGGGGTCTCCTAGTTCCAAAGGAGATGTACTCCGGGCTTGTTAC  
+

```

FFFFFFFFFFFFFFFFFFFFFFFFFFFFFFFFFFFFFFFFFFFFFFFFFFFFFFFFFFFFFFFFFFFFFFFFF:FFFFFFF
FFFFFFFFFFFFFFFFFFFFFFFFFFFFFFFFFFFFFFFFFFFFFFFFFFFFFFFFFFFFFFFFFFFFFFFFF
@A00155:342:HHGFNDSXY:1:2372:8621:21089 1:N:0:GAACCTAG+TCCGCATA
GAGAGGGATGTGGAGGGCGAGAGAGAGCGACTTCTCTCGGGCCCACAGCCTTACAGCTGTGGAGCACG
GTATCCTCTGCCGAAACAGAGGTTGGACAAGACCGGAGGGGTCTCCTAGTTCCAAAGGAGATGTACTC
+
FFFFFFFFFFFF:FFFFFFFFFFFFFFFFFFFFFFFFFFFFFFFFFFFFFFFFFFFFFFFFFFFFFFFFFFFFF
FFFFFFFFFFFFFFFFFFFFFFFFFFFFFFFFFFFFFFFFFFFFFFFFFFFFFFFFFFFFFFFFFFFFFFFFF:FFFFFFFFF
@A00155:342:HHGFNDSXY:1:2372:5773:26428 1:N:0:GAACCTAG+TCCGCATA
GGA CTCACTCTGGCCTATGGTCATCTCAATGCCGAGAGGGATGTGGAGGGCGAGAGAGAGCGACTTC
TCTCGGGCCCACAGCCTTACAGCTGTGGAGCACGGTATCCTCTGCCGAAACAGAGGTTG
+
FFFFFFFFFFFFF:FFFFFFFFFFFFFFFFFFFFFFFFFFFFFFFFFFFFFFFFFFFFFFFFFFFFFFFFFFF:FF
FFFFFFFFFFFFFFFFFFFFFFFFFFFFFFFFFFFFFFFFFFFFFFFFFFFFFFFFFFFFFFFFFFFFFFFFF
@A00155:342:HHGFNDSXY:1:2372:5728:30013 1:N:0:GAACCTAG+TCCGCATA
GGA CTCACTCTGGCCTATGGTCATCTCAATGCCGAGAGGGATGTGGAGGGCGAGAGAGAGCGACTTC
TCTCGGGCCCACAGCCTTACAGCTGTGGAGCACGGTATCCTCTGCCGAAACAGAGGGTG
+
FFFFFFFFFFFFFFFFFFFFFFFFFFFFFFFFFFFFFFFFFFFFFFFFFFFFFFFFFFFFFFFFFFFF,FFFFFFF:F:FF::FF
F:FFFFFF:FFF:F:FF,:FFFFFF:FF,F:, :FF:,F::FFFF,FF:F,,,F,FF,,F
@A00155:342:HHGFNDSXY:1:2372:7075:36542 1:N:0:GAACCTAG+TCCGCATA
AGAGAGAGCGACTTCTCTCGGGCCCACAGCCTTACAGCTGTGGAGCACGGTATCCTCTGCCGAAACAG
AGGTTGGACAAGACCGGAGGGGTCTCCTAGTTCCAAAGGAGATGTACTCCGGGCTTGTTACACGAC
+
FFFFFFFFFFFFFFFFFFFFFFFF:FF:FFFFFFF,FFFFFFF,FFF::FFFFFFFFFFFFFFFFFFFF:FFFFFFF
FF,FFF:FFFF:F:F:FFFFFFF:FFFF::FFFFF:FFF:F,FFFFFF,FF,FFFFFFFFF
@A00155:342:HHGFNDSXY:1:2373:28881:12242 1:N:0:GAACCTAG+TCCGCATA
GGATGTAGAGGGCGAGAGAGAGCGACTTCTCTCGGGCCCACAGCCTTACAGCTGTGGAGCACGGTATC
CTCTGCCGAAACAGAGGTTGGACAAGACCGGAGGGGTCTCCTAGTTCCAAAGGAGATGTACTCC
+
FFF:FFFFFFFFFFFFFFFFFFFF:FFFFFFFFFFFFFFFFFFFFFFFFFFFFFFFFFFFFFFFFFFFFF
FFFFFFFFFFFFFFFFFFFFFFFFFFFFFFFFFFFFFFFFFFFFFFFFFFFFFFFFFFFFFFFFFFFFF:FFFFFFFFF
@A00155:342:HHGFNDSXY:1:2373:28031:23484 1:N:0:GAACCTAG+TCCGCATA
TTACAGCTGTGGAGCACGGTATCCTCTGCCGAAACAGAGGTTGGACAAGACCGGAGGGGTCTCCTAGT
TCCAAAGGAGATGTACTCCGGGCTTGTTACACGACCTACCGTGTAAGTCGTAGTCTAGTAGGCTACCTG
+
FFFFFFFFFFFFFFFFFFFFFFFFFFFFFFFFFFFFFFFFFFFFFFFFFFFFFFFFFFFFFFFFFFFF:FFFFFFFFFFFFFFFFF:FFFFFFFFFFFFF
FFFFFFFFFFFFFFFFFFFFFFFF,FF:FFFFFFFFFFFFFFFFFFFFFFFFFFFFFFFFFFFFFFFFFFFFF:F:FFFF:F
@A00155:342:HHGFNDSXY:1:2373:3025:23923 1:N:0:GAACCTAG+TCCGCATA
GAGCGACTTCTCTCGGGCCCACAGCCTTACAGCTGTGGAGCACGGTATCCTCTGCCGAAACAGAGGTT
GGACAAGACCGGAGGGGTCTCCTAGTTCCAAAGGAGATGTACTCCGGGCTTGTTACACGACCTACCGTG
+
FFFFFFFFFFFFFFFFFFFFFFFFFFFFFFFFFFFFFFFFFFFFFFFFFFFFFFFFFFFFFFFFFFFFF:FFFFFFF
FFFFFFFFFFFFFFFFFFFFFFFFFFFFFFFFFFFFFFFFFFFFFFFFFFFFFFFFFFFFFFFFFFFFFFFFF:F
@A00155:342:HHGFNDSXY:1:2373:21820:28980 1:N:0:GAACCTAG+TCCGCATA
CTTCTCTCGGGCCCACAGCCTTACAGCTGTGGAGCACGGTATCCTCTGCCGAAACAGAGGTTGGACAA
GACCGGAGGGGTCTCCTGGTTCCAAAGGAGATGTACTCCGGGCTTGTTACACGACCTACCGTGTAAGTC
+
FFFFFFFFFFFFFFFFFFFFF:FFF:FFFFFFFFFFFFFFFFFFFFFFFFFFFFFFFFFFFFFFFFFFFFF:FFFF
FFFFFFFFF:FFFFFFFF:FFFFFFFFFFFFFFFFFFFF:FFFFF:FFFFFFFFF:FFFFFFFFFFFFFFFFF
@A00155:342:HHGFNDSXY:1:2374:12952:1188 1:N:0:GAACCTAG+TCCGCATA
GTCATCTCAATGCCGAGAGGGATGTGGAGGGCGAGAGAGAGCGACTTCTCTCGGGCCCACAGCCTTAC
AGCTGTGGAGCACGGTATCCTCTGCCGAAACAGAGGTTGGACAAGACCGGAGGGGTCTCCTAGTTCCA
+

```

FFFFFFFFFFFFFFFFFFFFFFFFFFFFFFFFFFFFFFFFFFFFFFFFFFFFFFFFFFFFFFFFFFFFFFFF  
FFFFFFFFFFFF:FFFFFFFFFFFFFFFFFFFFFFFFFFFFFFFFFFFFFFFFFFFFFFFFFFFFFFFFFFFF  
@A00155:342:HHGFNDSXY:1:2374:19886:2613 1:N:0:GAACCTAG+TCCGCATA  
ACTTCTCTCGGGCCACAGCCTTACAGCTGTGGAGCACGGTATCCTCTGCCGAAACAGAGGTTGGACA  
AGACCGGAGGGGTCTCCTAGTTCCAAAGGAGATGTACTCCGGGCTTGTTACGACCTACCGTGTAAGT  
+  
FFFFFFFFFFFFFFFFFFFFFFFFFFFFFFFFFFFFFFFFFFFFFFFFFFFFFFFFFFFFFFFFFFFFFFFF  
F,FFFFFFFFFFFFFFFFFFFFFFFFFFFFFFFFFFFFFFFFFFFFFFFFFFFFFFFFFFFFFFFFFFFF:FF  
@A00155:342:HHGFNDSXY:1:2374:20121:6778 1:N:0:GAACCTAG+TCCGCATA  
GAGCGACTTCTCTCGGGCCACAGCCTTACAACTGTGGAGCACGGTATCCTCTGCCGAAACAGAGGTT  
GGACAAGACCGGAGGGGTCTCCTAGTTCCAAAGGAGATGTACTCCGGGCTTGTTACGACCTACCGTG  
+  
:FFFFFFFFFFFF, :FFFFFFFFFFFF:FFFFFFFFFFFF, FF:FFF: :FFF:FFF:FFFFFFFFFFFF:F  
F:FFFF, FFFFFFFFFFFFFF:F:FFF, F:FFFF:FFFFFFFFFFFF:FFFFFFFF:FFFF, F, FFFF:F  
@A00155:342:HHGFNDSXY:1:2374:15628:13964 1:N:0:GAACCTAG+TCCGCATA  
CTTCTCTCGGGCCACAGCCTTACAGCTGTGGAGCACGGTATCCTCTGCCGAAACAGAGGTTGGACAA  
GACCGGAGGGGTCTCCTAGTTCCAAAGGAGATGTACTCCGGGCTTGTTACGACCTACCGTGTAAGTC  
+  
FFFFFFFFFFFFFFFFFFFFFFFFFFFFFFFFFFFFFFFFFFFFFFFFFFFFFFFFFFFFFFFFFFFFFFFF  
FFFFFFFFFFFFFFFFFFFFFFFFFFFFFFFFFFFFFFFFFFFFFFFFFFFFFFFFFFFFFFFFFFFFFFFF  
@A00155:342:HHGFNDSXY:1:2374:1732:15953 1:N:0:GAACCTAG+TCCGCATA  
GTATCCTCTGCCGAAACAGAGGTTGGACAAGACCGGAGGGGTCTCCTAGTTCCAAAGGAGATGTACTC  
CGGGCTTGTTACGACCTACCGTGTAAGTCGTAGTCTAGTAGGCTACCTGACGAGTCCTTTTtagGAC  
+  
FF,FFFFFFFFFFFFFFFFFFFFFFFFFFFFFFFFFFFFFFFFFFFFFFFFFFFFFFFFFFFFFFFFFFFF:FFFFFFFFFFFF:FFFFFFFFFFFFFFFF:FFFFFFF  
FFFFFFFFFFFF:FFFFFFFFFFFFFFFFFFFF, F, F: :FF:FFFF, F:FFFF: :FF: :FFFFFFFFFFFF: , FFFFFFFFF  
@A00155:342:HHGFNDSXY:1:2374:9245:20008 1:N:0:GAACCTAG+TCCGCATA  
TATCCTCTGCCGAAACAGAGGTTGGACAAGACCGGAGGGGTCTCCTAGTTCCAAAGGAGATGTACTCC  
GGGCTTGTTACGACCTACCGTGTAAGTCGTAGTCTAGTAGGCTACCTGACGAGTCCTT  
+  
FFFFFFFFFFFFFFFFFFFFFFFFFFFFFFFFFFFFFFFFFFFFFFFFFFFFFFFFFFFFFFFFFFFFFFFF:FFFFFFF  
FFFFFFFFFFFFFFFFFFFFFFFFFFFFFFFFFFFFFFFFFFFFFFFFFFFFFFFFFFFFFFFFFFFFFFFF  
@A00155:342:HHGFNDSXY:1:2374:6506:24471 1:N:0:GAACCTAG+TCCGCATA  
GTCCACTTAAGGACTCTCCTCTGGCCTATGGTCATCTCAATGCCGAGAGGGATGTGGAGGGCGAGAGA  
GAGCGACTTCTCTCGGGCCACAGCCTTACAGCTGTGGAGCACGGTATCCTCTGCCGAAACAGAGGTT  
+  
FFFFFFFFFFFFFFFFFFFFFFFFFFFF, FFFFFFF:FFFFFFFFFFFFFFFFFFFFFFFFFFFFFFFFFFFF  
FFFFFFFFFFFFFFFFFFFFFFFFFFFFFFFFFFFFFFFFFFFFFFFFFFFFFFFFFFFFFFFFFFFFFFFF  
@A00155:342:HHGFNDSXY:1:2375:24316:2362 1:N:0:GAACCTAG+TCCGCATA  
GAGGGCGAGAGAGAGAGACTTCTCTCGGGCCACAGCCTTACAGCTGTGGAGCACGGTATCCTCTGCC  
GAAACAGAGGTTGGACAAGACCGGAGGGGTCTCCTAGTTCCAAAGGAGATGTACTCCGGGCTTGTTCA  
+  
FFFFFFFFFFFFFFFFFFFFFFFFFFFFFFFFFFFFFFFFFFFFFFFFFFFFFFFFFFFFFFFFFFFFFFFF:FFFFFFFFFFFFFFFFFFFFFFFFFFFFFFFFFFFF  
FFFFFFFFFFFFFFFFFFFFFFFFFFFFFFFFFFFFFFFFFFFFFFFFFFFFFFFFFFFFFFFFFFFFFFFF  
@A00155:342:HHGFNDSXY:1:2375:10257:31156 1:N:0:GAACCTAG+TCCGCATA  
CCCACAGCCTTACAGCTGTGGAGCACGGTATCCTCTGCCGAAACAGAGGTTGGACAAGACCGGAGGGG  
TCTCCTGGTTCCAAAGGAGATGTACTCCGGGCTTGTTACGACCTACCGTGTAAGTCGTAGTCTAGTA  
+  
FFFFFFFFFFFFF:FFFFFFFFFFFFFFFFFFFFFFFFFFFFFFFFFFFFFFFFFFFFFFFFFFFFFFFFFFFF  
FFFFFFFFFFFFFFFFFFFFFFFFFFFFFFFFFFFFFFFFFFFFFFFFFFFFFFFFFFFFFFFFFFFFFFFF:FF  
@A00155:342:HHGFNDSXY:1:2375:12545:32894 1:N:0:GAACCTAG+TCCGCATA  
AGGGATGTGGAGGGCGAGAGAGAGCGACTTCTCTCGGGCCACAGCCTTACAGCTGTGGAGCACGGTA  
TCTCTGCCGAAACAGAGGTTGGACAAGACCGGAGGGGTCTCCTAGTTCCAAAGGAGATGTAC  
+



```

,FFFFFFFFFFFFFFFFFFFFFFFFFFFFFFFFFFFFFFFFFFFFFFFFFFFFFFFFFFFFFFFFFFFFFFFFFFFFFFFF
FFFFFFFFFFFFFFFFFFFFFFFFFFFFFFFFFFFFFFFFFFFFFFFFFFFFFFFFFFFFFFFFFFFFFFFFFFFFFFFF
@A00155:342:HHGFNDSXY:1:2376:26955:11318 1:N:0:GAACCTAG+TCCGCATA
CTTCTCTCGGGCCACAGCCTTACAGCTGTGGAGCACGGTATCCTCTGCCGAAACAGAGGTTGGACAA
GACCGGAGGGGTCTCCTAGTTCCAAAGGAGATGTACTCCGGGCTTGTTACGACCTACCGTGTAAGTC
+
FFFFFFFFFFFFFFFFFFFFFFFFFFFFFFFFFFFFFFFFFFFFFFFFFFFFFFFFFFFFFFFFFFFFFFFFFFFFFFFF
FFFFFFFFFFFFFFFFFFFFFFFFFFFFFFFFFFFFFFFFFFFFFFFFFFFFFFFFFFFFFFFFFFFFFFFFFFFFFFFF
@A00155:342:HHGFNDSXY:1:2376:7030:30389 1:N:0:GAACCTAG+TCCGCATA
TGTCCTACTTAAGGACTCACCTCTGGCCTATGGTCATCTCAATGCCGAGAGGGATGTGAAGGGCGAGAG
AGAGCGACTTCTCTCGGGCCACAGCCTTACAGCTGTGGAGCACGGTATCCTCTGCCGAAACAGAGGT
+
FFFFFFFFFFFFFFFFFFFFFFFFFFFFFFFFFFFFFFFFFFFFFFFFFFFFFFFFFFFFFFFFFFFFFFFFFFFFFFFF
FFFFFFFFFFFFFFFFFFFFFFFFFFFFFFFFFFFFFFFFFFFFFFFFFFFFFFFFFFFFFFFFFFFFFFFFFFFFFFFF
@A00155:342:HHGFNDSXY:1:2376:10863:30671 1:N:0:GAACCTAG+TCCGCATA
GAGGGCGAGAGAGAGCGACTTCTCTCGGGCCACAGCCTTACAGCTGTGGAGCACGGTATCCTCTGCC
GAAACAGAGGTTGGACAAGACCGGAGGGGTCTCCTAGTTCCATAGGAGATGTACTCCGGGCTTGTTCA
+
FFFFFFFFFFFFFFFFFFFFFFFFFFFFFFFFFFFFFFFFFFFFFFFFFFFFFFFFFFFFFFFFFFFFFFFFFFFFFFFF
FFFFFFFFFFFFFFFFFFFFFFFFFFFFFFFFFFFFFFFFFFFFFFFFFFFFFFFFFFFFFFFFFFFFFFFFFFFFFFFF
@A00155:342:HHGFNDSXY:1:2376:11107:30686 1:N:0:GAACCTAG+TCCGCATA
GAGGGCGAGAGAGAGCGACTTCTCTCGGGCCACAGCCTTACAGCTGTGGAGCACGGTATCCTCTGCC
GAAACAGAGGTTGGACAAGACCGGAGGGGTCTCCTAGTTCCATAGGAGATGTACTCCGGGCTTGTTCA
+
FFFFFFFFFFFFFFFFFFFFFFFFFFFFFFFFFFFFFFFFFFFFFFFFFFFFFFFFFFFFFFFFFFFFFFFFFFFFFFFF
FFFFFFFFFFFFFFFFFFFFFFFFFFFFFFFFFFFFFFFFFFFFFFFFFFFFFFFFFFFFFFFFFFFFFFFFFFFFFFFF
@A00155:342:HHGFNDSXY:1:2376:15013:35790 1:N:0:GAACCTAG+TCCGCATA
CTCAATGCCGAGAGGGATGTGGAGGGCGAGAGAGAGCGACTTCTCTCGGGCCACAGCCTTACAGCTG
TGGAGCACGGTATCCTCTGCCGAAACAGAGGTTGGACAAGACCGGAGGGGTCTCCTAGTTCCAAAGGA
+
FFFFFFFFFFFFFFFFFFFFFFFFFFFFFFFFFFFFFFFFFFFFFFFFFFFFFFFFFFFFFFFFFFFFFFFFFFFFFFFF
FFFFFFFFFFFFFFFFFFFFFFFFFFFFFFFFFFFFFFFFFFFFFFFFFFFFFFFFFFFFFFFFFFFFFFFFFFFFFFFF
@A00155:342:HHGFNDSXY:1:2377:27335:7686 1:N:0:GAACCTAG+TCCGCATA
AGAGAGAGTGACTTCTCTCGGGCCACAGCCTTACAGCTGTGGAGCACGGTATCCTCTGCCGAAACAG
AGGTTGGACAAGACCGGAGGGGTCTCCTAGTTCCAAAGGAGATGTACTCCGGGCTTGTTACGACCTA
+
FFFFFFFFFFFFFFFFFFFFFFFFFFFFFFFFFFFFFFFFFFFFFFFFFFFFFFFFFFFFFFFFFFFFFFFFFFFFFFFF
FFFFFFFFFFFFFFFFFFFFFFFFFFFFFFFFFFFFFFFFFFFFFFFFFFFFFFFFFFFFFFFFFFFFFFFFFFFFFFFF
@A00155:342:HHGFNDSXY:1:2377:28131:17018 1:N:0:GAACCTAG+TCCGCATA
CTCAATGCCGAGAGGGATGTGGAGGGCGAGAGAGAGCGACTTCTCTCGGGCCACAGCCTTACAGCTG
TGGTGACGGTATCCTCTGCCGAAACAGAGGTTGGACAAGACCGGAGGGGTCTCCTAGTTCCAAAGGA
+
FFFFFFFFFFFFFFFFFFFFFFFFFFFFFFFFFFFFFFFFFFFFFFFFFFFFFFFFFFFFFFFFFFFFFFFFFFFFFFFF
FFFFFFFFFFFFFFFFFFFFFFFFFFFFFFFFFFFFFFFFFFFFFFFFFFFFFFFFFFFFFFFFFFFFFFFFFFFFFFFF
@A00155:342:HHGFNDSXY:1:2377:9236:21527 1:N:0:GAACCTAG+TCCGCATA
CTGTGTCCACTTAAGGACTCACCTCTGGCCTATGGTCATCTCAATGCCGAGAGGGATGTGGAGGGCGA
GAGAGAGCGACTTCTCTCGGGCCACAGCCTTACAGCTGTGGAGCACGGTATCCTCTGCCGAAACAGA
+
FFFFFFFFFFFFFFFFFFFFFFFFFFFFFFFFFFFFFFFFFFFFFFFFFFFFFFFFFFFFFFFFFFFFFFFFFFFFFFFF
FFFFFFFFFFFFFFFFFFFFFFFFFFFFFFFFFFFFFFFFFFFFFFFFFFFFFFFFFFFFFFFFFFFFFFFFFFFFFFFF
@A00155:342:HHGFNDSXY:1:2377:27326:32659 1:N:0:GAACCTAG+TCCGCATA
TTACAGCTGTGGAGCACGGTATCCTCTGCCGAAACAGAGGTTGGACAAGACCGGAGGGGTCTCCTAGT
TCCAAAGGAGATGTACTCCGGGCTTGTTACGACCTACCGTGTAAGTCGTAGTCTAGTAGGCTACCTG
+

```

```
FFFFFFFFFFFFFFFFFFFFFFFFFFFFFFFFFFFFFFFFFFFFFFFFFFFFFFFFFFFFFFFFFFFFF:FFFFFFFFFFFFFFFFFFFFFFF  
FFFFFFFFFFFFFFFFFFFFFFFFFFFFFFFFFFFFFFFFFFFFFFFFFFFFFFFFFFFFFFFFFFFFF@A00155:342:HHGFNDSXY:1:2378:29622:4225 1:N:0:GAACCTAG+TCCGCATA  
AGCGACTTCTCTCGGGCCCACAGCCTTACAGCTGTGGAGCACGGTATCCTCTGCCGAAACAGAGGTTG  
GACAAGACCGGAGGGGTCTCCTAGTTCCAAAGGAGATGTACTCCGGGCTTGTTACAGACCTACCGTGT  
+  
FF,FFFFFFFFFFF,FF:FFFFFFFFFFFFFFFF,FFFFFFFFFFFFFFFFFFFFFFFF:FFFFFFFFFFFFFFF  
:FFFF,FFFFFFFFFF:FFFFF:FFFFFFFFFFFFFFFFFFFFFFFF:FFFFFFFFFF:FFFFFFFF,FFFF  
@A00155:342:HHGFNDSXY:1:2378:7401:6699 1:N:0:GAACCTAG+TCCGCATA  
GGTCTTGTCCAACCTCTGTTTCGGCAGAGGATACCGTGCTCCACAGCTGTAAGGCTGTGGGCCCCGAGA  
GAAGTCGCTCTCTCTCGCCCTCCACATCCCTCTCGGCATTGAGATGACCATAGGCCAGAGGTGAGTCC  
+  
FF:FFFFFFFFFFFFFFFFFFFFFFFFFFFFFFFF:FFFF:,F:FFFFFFFFFFFF,,F::FFFF:FFFF:  
F:FFFFFFFFF:FFFF:FFFFFFFF:FFFF,FFFF:FFFFFFFFFFFF:FFFF:,FFFF,FFFFFFFFF  
@A00155:342:HHGFNDSXY:1:2378:2989:10770 1:N:0:GAACCTAG+TCCGCATA  
CTTCTCTCGGGCCCACAGCCTTACAGCTGTGGAGCACGGTATCCTCTGCCGAAACAGAGGTTGGACAA  
GACCGGAGGGGTCTCCTAGTTCCAAAGGAGATGTACTCCGGGCTTGTTACAGACCTACCGTGTAAGTC  
+  
FFFFFFFFFFFFFFFF:FFFFFFFFFFFFFFFFFFFFFFFFFFFFFFFFFFFFFFFFFFFFFFFFFFFFF  
:FFFFFF:FFFFFFFFFFFFFFFFFFFFFFFFFFFFFFFFFFFFFFFFFFFF,FFFFFFFFFFFFFFFFFFFF:FFF  
@A00155:342:HHGFNDSXY:1:2378:5981:24158 1:N:0:GAACCTAG+TCCGCATA  
GAGGGCGAGAGAGAGCGACTTCTCTCGGGCCCACAGCCTTACAGCTGTGGAGCACGGTATCCTCTGCC  
GAAACAGAGGTTGGACAAGACCGGAGGGGTCTCCTAGTTCCAAAGGAGATGTACTCCGGGCTTGTTCA  
+  
FFFFFFFFFFFFFFFFFFFFFFFFFFFFFFFFFFFFFFFFFFFFFFFFFFFFFFFFFFFFFFFFFFFFF:FFFFFFFFFFFFFFFF  
F::FFFFFFFFFFFFFFFFFFFFFFFFFFFFFFFFFFFFFFFFFFFFFFFFFFFFFFFFFFFFFFFFFFFFF  
@A00155:342:HHGFNDSXY:1:2378:12961:32769 1:N:0:GAACCTAG+TCCGCATA  
TATCCTCTGCCGAAACAGAGGTTGGACAAGACCGGAGGGGTCTCCTAGTTCCAAAGGAGATGTACTCC  
GGGCTTGTTACAGACCTACCGTGTAAGTCGTAGTCTAGTAGGCTACCTGACGAGTCCTTTTTAGGACG  
+  
FFFFFFFFFFFFFFFFFFFFFFFFFFFFFFFFFFFFFFFFFFFFFFFFFFFFFFFFFFFFFFFFFFFFF  
FFFFFFFFFFFFFFFFFFFFFFFFFFFFFFFFFFFFFFFFFFFFFFFFFFFFFFFFFFFFF:FFFFFFFFFFFFFFFFFFFFFFF  
@A00155:342:HHGFNDSXY:1:2378:32958:34209 1:N:0:GAACCTAG+TCCGCATA  
CTCTGGCCTATGGTCATCTCAATGCCGAGAGGGATGTGAAGGGCGAGAGAGAGCGACTTCTCTCGGGC  
CCACAGCCTTACAGCTGTGGAGCACGGTATCCTCTGCCGAAACAGAGGTTGGACAAGACCGGAGGGGT  
+  
F:FFFFFF:FFFFFFFFFFFFFFFFFFFF:,FFFFFFFFF,FFFFFFFFFFFF,F:FFFFFFFFFFFFFFF:  
FFFFFFF:,FFFFFFFFF:FFFF:FFFF:FFFFFFFFFFFFFFFFFFFFFFFFFFFFFFFFFFFFFFFFFFFFF  
@A00155:342:HHGFNDSXY:1:2401:16215:5744 1:N:0:GAACCTAG+TCCGCATA  
GGATGTGGAGGGCGAGAGAGAGCGACTTCTCTCGGGCCCACAGCCTTACAGCTGTGGAGCACGGTATC  
CTCTGCCGAAACAGAGGTTGGACAAGACCGGAGGGGTCTCCTAGTTCCAAAGGAGATGTACTCC  
+  
FFFFFFFFFFFFFFFFFFFFFFFFFFFFFFFFFFFFFFFFFFFFFFFFFFFFFFFFFFFFFFFFFFFFF  
:FFFFFFFFFFFFFFFFFFFFFFFFFFFFFFFFFFFFFFFFFFFFFFFFFFFFFFFFFFFFFFFFFFFFF  
@A00155:342:HHGFNDSXY:1:2401:16315:5791 1:N:0:GAACCTAG+TCCGCATA  
GGATGTGGAGGGCGAGAGAGAGCGACTTCTCTCGGGCCCACAGCCTTACAGCTGTGGAGCACGGTATC  
CTCTGCCGAAACAGAGGTTGGACAAGACCGGAGGGGTCTCCTAGTTCCAAAGGAGATGTACTCC  
+  
FFFFFFFFFFFFFFFFFFFFFFFFFFFFFFFFFFFFFFFFFFFFFFFFFFFFFFFFFFFFFFFFFFFFF:F:FFFFFFFFFFFF  
FFFFFFFFFFFFFFFFFFFFFFFFFFFFFFFFFFFFFFFFFFFFFFFFFFFFFFFFFFFFFFFFFFFFF  
@A00155:342:HHGFNDSXY:1:2401:10004:9518 1:N:0:GAACCTAG+TCCGCATA  
TCTCTCGGGCCCACAGCCTTACAGCTGTGGAGCACGGTATCCTCTGCCGAAACAGAGGTTGGACAAGA  
CCGAGAGGGGTCTCCTAGTTCCAAAGGAGATGTACTCCGGGCTTGTTACAGACCTACCGTGTAAGTCGT  
+
```

FFFFFFFFFFFFFFFFFFFFFFFFFFFFFFFFFFFFFFFF,FFFFFF,FFFFFF:FFFFFFFFFFFFFFFFFFFF  
FFFFFFFF:FFFFFFFFFFFFFFFFFFFFFFFFFFFFFFFFFFFFFFFFFFFFFFFFFFFFFFFFFFFFFFFF  
@A00155:342:HHGFNDSXY:1:2401:8287:32002 1:N:0:GAACCTAG+TCCGCATA  
CTATGGTCATCTCAATGCCGAGAGGGATGTGGAGGGCGAGAGAGCGACTTCTCTCGGGCCCACAGC  
CTTACAGCTGTGGAGCACGGTATCCTCTGCCGAAACAGAGGTTGGACAAGACCGGAGGGGTCTCCTA  
+  
FFFFFFFFFFFFFFFFFFFFFFFFFFFFFFFFFFFFFFFF:F:FFFFFFFFFFFFFFFFFFFFFFFFFFFF  
FFFFFFFFFFFFFFFFFFFFFFFFFFFFFFFFFFFFFFFFFFFFFFFFFFFFFFFFFFFFFFFFFFFFFFFF  
@A00155:342:HHGFNDSXY:1:2402:28944:6496 1:N:0:GAACCTAG+TCCGCATA  
GCGACTTCTCTCGGGCCCACAGCCTTACAGCTGTGGAGCACGGTATCCTCTGCCGAAACAGAGGTTGG  
ACAAGACCGGAGGGGTCTCCTGGTTCCAAAGGAGATGTACTCCGGGCTTGTTACGACCTACCGTGTA  
+  
FFFFFFFFFFFFFFFFFFFFFFFFFFFFFFFFFFFFFFFFFFFFFFFFFFFFFFFFFFFFFFFFFFFFFFFF  
FFFF:FFFFFFFFFFFFFFFF:FFFFFFFFFFFFFFFFFFFFFFFFFFFFFFFFFFFFFFFF:FFFFFF:FFFF  
@A00155:342:HHGFNDSXY:1:2402:29116:9298 1:N:0:GAACCTAG+TCCGCATA  
CTTCTCTCGGGCCCACAGCCTTACAGCTGTGGAGCACGGTATCCTCTGCCGAAACAGAGGTTGGACAA  
GACCGGAGGGGTCTCCTAGTTCCAAAGGAGATGTACTCCGGGCTTGTTACGACCTACCGTGTAAGTC  
+  
FFFFFFFFFFFFFFFFFFFFFFFFFFFFFFFFFFFFFFFFFFFFFFFFFFFFFFFFFFFFFFFFFFFFFFFF  
FFFFFFFFFFFFFFFFFFFFFFFFFFFFFFFFFFFFFFFF:FFFFFFFFFFFFFFFFFFFFFFFFFFFFFFFF  
@A00155:342:HHGFNDSXY:1:2402:25870:11256 1:N:0:GAACCTAG+TCCGCATA  
GGATGTGGAGGGCGAGAGAGAGCGACTTCTCTCGGGCCCACAGCCTTACAGCTGTGGAGCACGGTATC  
CTCTGCCGAAACAGAGGTTGGACAAGACCGGAGGGGTCTCCTAGTTCCAAAGGAGATGTACTCC  
+  
FFFFFFFFFFFFFFFFFFFFFFFFFFFFFFFFFFFFFFFFFFFFFFFFFFFFFFFFFFFFFFFFFFFFFFFF  
FFFFFFFFFFFFFFFFFFFFFFFFFFFFFFFFFFFFFFFFFFFFFFFFFFFFFFFFFFFFFFFFFFFFFFFF  
@A00155:342:HHGFNDSXY:1:2402:2871:16642 1:N:0:GAACCTAG+TCCGCATA  
TAAGGACTCTCCTCTGGCCTATGGTCATCTCAATGCCGAGAGGGATGTGGAGGGCGAGAGAGAGCGAC  
TTCTCTCGGGCCCACAGCCTTACAGCTGTGGAGCACGGTATCCTCTGCCGAAACAGAGGTTGGACAAG  
+  
:FFFFFFFFFFFFFFFF:FFFFFFFFFFFFFFFFFFFFFFFFFFFFFFFF:FFFFFFFFFFFF:FFFFFFFF  
FFFFFFFFFFFFFFFFFFFFFFFF:FFFFFFFFFFFF:F,FFFF,F,FF,FF:FF::,FFFFFFFFFFFF:  
@A00155:342:HHGFNDSXY:1:2402:30563:21042 1:N:0:GAACCTAG+TCCGCATA  
CTCAATGCCGAGAGGGATGTGGAGGGCGAGAGAGAGCGACTTCTCTCGGGCCCACAGCCTTACAGCTG  
TGGAGCACGGTATCCTCTGCCGAAACAGAGGTTGGACAAGACCGGAGGGGTCTCCTAGTTCCAAAGG  
+  
FFFFFFFFFFFFFFFFFFFF:FFFFFFFFFFFFFFFFFFFFFFFFFFFFFFFF:FFFFFFFFFFFFFFFFFFFF  
FFFFFFFFFFFFFFFFFFFFFFFFFFFFFFFFFFFFFFFF:FFFFFFFFFFFFFFFF:FFFFFFFFFFFFFFFF  
@A00155:342:HHGFNDSXY:1:2403:12572:6668 1:N:0:GAACCTAG+TCCGCATA  
CTTCTCTCGGGCCCACAGCCTTACAGCTGTGGAGCACGGTATCCTCTGCCGAAACAGAGGTTGGACAA  
GACCGGAGGGGTCTCCTAGTTCCAAAGGAGATGTACTCCGGGCTTGTTACGACCTACCGTGTAAGTC  
+  
FFFFFFFFFFFFFFFFFFFFFFFFFFFFFFFFFFFFFFFFFFFFFFFFFFFFFFFFFFFFFFFFFFFFFFFF  
F:FFFFFFFFFFFFFFFFFFFFFFFFFFFFFFFF:FFFFFFFFFFFFFFFF:FFFFFFFFFFFFFFFFFFFF  
@A00155:342:HHGFNDSXY:1:2403:22218:11569 1:N:0:GAACCTAG+TCCGCATA  
CCATGCCCCGCCACACCGCCTTAGATCAGCTGTGTCCACTTAAGGACTCACCTCTGGCCTATGGTCAT  
CTCAATGCCGAGAGGGATGTGGAGGGCGAGAGAGAGCGACTTCTCTCGGGCCCACAGCCTTACAGCTG  
+  
FFFFFFFFFFFFFFFFFFFFFFFFFFFF::FFFFFFFFFFFFFFFFFFFFFFFFFFFFFFFFFFFFFFFFFFFF  
FFFFFFFFFFFFFFFFFFFFFFFFFFFFFFFFFFFFFFFFFFFFFFFFFFFFFFFFFFFFFFFFFFFFFFFF  
@A00155:342:HHGFNDSXY:1:2403:30680:14325 1:N:0:GAACCTAG+TCCGCATA  
ATGCCCCGCCACACCGCCTTAGATCAGCTGTGTCCACTTAAGGACTCACCTCTGGCCTATGGTCATCT  
CAATGCCGAGAGGGATGTGGAGGGCGAGAGAGAGCGACTTCTCTCGGGCCCACAGCCTTACAGCTGTG  
+

FFFFFFFFFFFFFFFFFFFFFFFFFFFFFFFFFFFFFFFFFFFFFFFFFFFFFFFFFFFFFFFFFFFFFFFFFFFFFFFF  
:FFFFFFFFFFFFFFFFFFFFFFFFFFFFFFFFFFFFFFFFFFFFFFFFFFFFFFFFFFFFFFFFFFFFFFFFFFFFFFFF  
@A00155:342:HHGFNDSXY:1:2403:2564:15452 1:N:0:GAACCTAG+TCCGCATA  
ACCTCTGTTTCGGCAGAGGATACCGTGCTCCACAGCTGTAAGGCTGTGGGCCCGAGAGAAGTCGCTCT  
CTCTCGCCCTCCACATCCCTCTCGGCATTGAGATGACCATAGGCCAGAGGAGTCCTTAAGTGGACA  
+  
FFFFFFFFFFFFFFFFFFFFFFFFFFFFFFFFFFFFFFFFFFFFFFFFFFFFFFFFFFFFFFFFFFFFFFFFFFFFFFFF  
FFFFFFFFFFFFFFFFFFFFFFFFFFFFFFFFFFFFFFFFFFFFFFFFFFFFFFFFFFFFFFFFFFFFFFFFFFFFFFFF  
@A00155:342:HHGFNDSXY:1:2403:27959:17284 1:N:0:GAACCTAG+TCCGCATA  
GAGAGAGCGACTTCTCTCGGGCCACAGCCTTACAGCTGTGGAGCACGGTATCCTCTGCCGAAACAGA  
GGTTGGACAAGACCGGAGGGGTCTCCTAGTTCCAAAGGAGATGTACTCCGGGCTTGTTACAGACCTAC  
+  
FFFFFFFFFFFFFFFFFFFFFFFFFFFFFFFFFFFFFFFFFFFFFFFFFFFFFFFFFFFFFFFFFFFFFFFFFFFFFFFF  
FFFFFFFFFFFFFFFFFFFFFFFFFFFFFFFFFFFFFFFFFFFFFFFFFFFFFFFFFFFFFFFFFFFFFFFFFFFFFFFF  
@A00155:342:HHGFNDSXY:1:2403:27480:17707 1:N:0:GAACCTAG+TCCGCATA  
GAGAGAGCGACTTCTCTCGGGCCACAGCCTTACAGCTGTGGAGCACGGTATCCTCTGCCGAAACAGA  
GGTTGGACAAGACCGGAGGGGTCTCCTAGTTCCAAAGGAGATGTACTCCGGGCTTGTTACAGACCTAC  
+  
FFFFFFFFFFFFFFFFFFFFFFFFFFFFFFFFFFFFFFFFFFFFFFFFFFFFFFFFFFFFFFFFFFFFFFFFFFFFFFFF  
FFFFFFFFFFFFFFFFFFFFFFFFFFFFFFFFFFFFFFFFFFFFFFFFFFFFFFFFFFFFFFFFFFFFFFFFFFFFFFFF  
@A00155:342:HHGFNDSXY:1:2403:28583:18208 1:N:0:GAACCTAG+TCCGCATA  
GAGAGAGCGACTTCTCTCGGGCCACAGCCTTACAGCTGTGGAGCACGGTATCCTCTGCCGAAACAGA  
GGTTGGACAAGACCGGAGGGGTCTCCTAGTTCCAAAGGAGATGTACTCCGGGCTTGTTACAGACCTAC  
+  
FFFFFFFFFFFFFFFFFFFFFFFFFFFFFFFFFFFFFFFFFFFFFFFFFFFFFFFFFFFFFFFFFFFFFFFFFFFFFFFF  
F:FFFFFFFFFFFFFFFFFFFFFFFFFFFFFFFFFFFFFFFFFFFFFFFFFFFFFFFFFFFFFFFFFFFFFFFFFFFF  
@A00155:342:HHGFNDSXY:1:2403:1588:32925 1:N:0:GAACCTAG+TCCGCATA  
GTCATCTCAATGCCGAGAGGGATGTGGAGGGCGAGAGAGAGCGACTTCTCTCGGGCCACAGCCTTAC  
AGCTGTGGAGCACGGTATCCTCTGCCGAAACAGAGGTTGGACAAGACCGGAGGGGTCTCCTAGTTCCA  
+  
FFFFFFFFFFFFFFFFFFFFFFFFFFFFFFFFFFFFFFFFFFFFFFFFFFFFFFFFFFFFFFFFFFFFFFFFFFFFFFFF  
FFF:FFFFFFFFFFFFFFFFFFFFFFFFFFFFFFFFFFFFFFFFFFFFFFFFFFFFFFFFFFFFFFFFFFFFFFFF  
@A00155:342:HHGFNDSXY:1:2404:19696:1000 1:N:0:GAACCTAG+TCCGCATA  
TGGCCTATGGTCATCTCAATGCCGAGAGGGATGTGGAGGGCGAGAGAGAGCGACTTCTCTCGGGCCCA  
CAGCCTTACAGCTGTGGAGCACGGTATCCTCTGCCGAAACAGAGGTTGGACAAGACCGGAGG  
+  
FFFFFFFFFFFFFFFFFFFFFFFFFFFFFFFFFFFFFFFFFFFFFFFFFFFFFFFFFFFFFFFFFFFFFFFFFFFFFFFF  
FFFFF,F,FFFFFFFFFFFFFFFFFFFFFFFFFFFFFFFFFFFFFFFFFFFFFFFFFFFFFFFFFFFFFFFFFFFF  
@A00155:342:HHGFNDSXY:1:2404:7554:5932 1:N:0:GAACCTAG+TCCGCATA  
TCCTCTGGCCTATGGTCATCTCAATGCCGAGAGGGATGTGGAGGGCGAGAGAGAGCGACTTCTCTCGG  
GCCACAGCCTTACAGCTGTGGAGCACGGTATCCTCTGCCGAAACAGAGGTTGGACAAGACCGGAGG  
+  
FFF:FFFFFFFFFFFFFFFFFFFFFFFFFFFFFFFFFFFFFFFFFFFFFFFFFFFFFFFFFFFFFFFFFFFFFFFF  
FFFFFFFFFFFF:F:FFFFFFFFFFFFFFFFFFFFFFFFFFFFFFFFFFFFFFFFFFFFFFFFFFFFFFFFFFFF  
@A00155:342:HHGFNDSXY:1:2404:16161:8030 1:N:0:GAACCTAG+TCCGCATA  
CCGAGAGGGATGTGGAGGGCGAGAGAGAGCGACTTCTCTCGGGCCACAGCCTTACAGCTGTGGAGCA  
CGGTATCCTCTGCCGAAACAGAGGTTGGACAAGACCGGAGGGGTCTCCTGGTTCCAAAGGAGATGTAC  
+  
FFFFFFFFFFFFFFFFFFFFFFFFFFFFFFFFFFFFFFFFFFFFFFFFFFFFFFFFFFFFFFFFFFFFFFFFFFFFFFFF  
FFFFF,FFFFFFFFFFFFFFFFFFFFFFFFFFFFFFFFFFFFFFFFFFFFFFFFFFFFFFFFFFFFFFFFFFFF  
@A00155:342:HHGFNDSXY:1:2404:22914:9079 1:N:0:GAACCTAG+TCCGCATA  
GTATCCTCTGCCGAAACAGAGGTTGGACAAGACCGGAGGGGTCTCCTAGTTCCAAAGGAGATGTACTC  
CGGGCTTGTTACAGACCTACCGTGTAAGTCGTAGTCTAGTAGGCTACCTGACGAGTCCTTTTAGGAC  
+

FFFFFFFFFFFFFFFFFFFFFFFFFFFFFFFFFFFFFFFFFFFFFFFFFFFFFFFFFFFFFFFFFFFFFFFF  
FFFFFFFFFFFFFFFFFFFFFFFFFFFFFFFFFFFFFFFFFFFFFFFFFFFFFFFFFFFFFFFFFFFFFFFF:FFFFFFFFFFFFFF:FFFFFFFF  
@A00155:342:HHGFNDSXY:1:2404:3568:11146 1:N:0:GAACCTAG+TCCGCATA  
CTCTGGCCTATGGTCATCTCAATGCCGAGAGGGATGTGAAGGGCGAGAGAGAGCGACTTCTCTCGGGC  
CCACAGCCTTACAGCTGTGGAGCACGGTATCCTCTGCCGAAACAGAGGTTGGACAAGACCGGAGGGGT  
+  
FFFFFFFFFFFFFFFFFFFFFFFFFFFFFFFFFFFFFFFFFFFFFFFFFFFFFFFFFFFFFFFFFFFFFFFF,FFFFFFFFFFFFFFFFFFFFFFFFFFFFFFFF  
FFFFFFFFFFFFFFFFFFFFFFFFFFFFFFFFFFFFFFFFFFFFFFFFFFFFFFFFFFFFFFFFFFFFFFFF,FFFFFFFFFFFFFFFFFFFFFFFFFFFFFFFF  
@A00155:342:HHGFNDSXY:1:2404:3070:11350 1:N:0:GAACCTAG+TCCGCATA  
CTCTGGCCTATGGTCATCTCAATGCCGAGAGGGATGTGAAGGGCGAGAGAGAGCGACTTCTCTCGGGC  
CCACAGCCTTACAGCTGTGGAGCACGGTATCCTCTGCCGAAACAGAGGTTGGACAAGACCGGAGGGGT  
+  
FFFFFFFFF:FFFFF:FF:FFFFFFFFFFFF:FFFFFFFFFFFF,FFFFFF, :FFFFF,FFFFFFFFFFFF  
:FFFFFFFFF:,F:FFFFF:FFFFFFFFFFFF,FFF:FFFF:FF:FFFF:FFFFFFFFF,FFFFFFFFFFFF  
@A00155:342:HHGFNDSXY:1:2404:26892:13745 1:N:0:GAACCTAG+TCCGCATA  
AATGCCGAGAGGGATGTGGAGGGCGAGAGAGAGCGACTTCTCTCGGGCCACAGCCTTACAGCTGTGG  
AGCACGGTATCCTCTGCCGAAACAGAGGTTGGACAAGACCGGAGGGGTCTCCTGGTTCCAAAGGAGA  
+  
FF:FFF:FFFF:FFFF:FFFF:FFFFFFFF:FFFFF::FFFFFFFF,FF:FFFFFFFFFFFFFFFF,FF  
FFFFFFFF::F:FFFFFFFFFFFF:FFFFF:FFFFFFFF:FFFFFFFFFFFFFFFFFFFFFFFFFFFFFFFF:FFF  
@A00155:342:HHGFNDSXY:1:2404:30472:13870 1:N:0:GAACCTAG+TCCGCATA  
CGAGAGGGATGTGGAGGGCGAGAGAGAGCGACTTCTCTCGGGCCACAGCCTTACAGCTGTGGAGCAC  
GGTATCCTCTGCCGAAACAGAGGTTGGACAAGACCGGAGGGGTCTCCTGGTTCCAAAGGAGATGTACT  
+  
F:FFFFFFFF, :FF:FFF:FFFFFFFF:FFFFFFFFFFFF:F:FF:FFFFFFFF, :F::FFFF,FFFF:FF  
::FFFFF:FFFF,FFFFFFFF,FFF:FFFFFFFFFFFFFFFFFFFFFFFFFFFFFFFF:FFFFFFFF:FFFFF:FFF  
@A00155:342:HHGFNDSXY:1:2404:24813:23046 1:N:0:GAACCTAG+TCCGCATA  
CTTCTCTCGGGCCACAGCCTTACAGCTGTGGAGCACGGTATCCTCTGCCGAAACAGAGGTTGGACAA  
GACCGGAGGGGTCTCCTAGTTCCAAAGGAGATGTACTCCGGGCTTGTTACGACCTACCGTGTAAGTC  
+  
FFFFFFFFFFFFFFFFFFFFFFFFFFFFFFFFFFFFFFFFFFFFFFFFFFFFFFFFFFFFFFFFFFFFFFFF  
FFFFFFFFFFFFFFFFFFFFFFFFFFFFFFFFFFFFFFFFFFFFFFFFFFFFFFFFFFFFFFFFFFFFFFFF  
@A00155:342:HHGFNDSXY:1:2404:14082:34741 1:N:0:GAACCTAG+TCCGCATA  
TTACAGCTGTGGAGCACGGTATCCTCTGCCGAAACAGAGGTTGGACAAGACCGGAGGGGTCTCCTAGT  
TCCAAAGGAGATGTACTCCGGGCTTGTTACGACCTACCGTGTAAGTCGTAGTCTAGTAGGCTACCTG  
+  
FFFFFFFFFFFFFFFFFFFFFFFFFFFFFFFFFFFFFFFFFFFFFFFFFFFFFFFFFFFFFFFFFFFFFFFF  
FFFFFFFFFFFFFFFFFFFFFFFFFFFFFFFFFFFFFFFFFFFFFFFFFFFFFFFFFFFFFFFFFFFFFFFF  
@A00155:342:HHGFNDSXY:1:2405:26775:4053 1:N:0:GAACCTAG+TCCGCATA  
TGGTCATCTCAATGCCGAGAGGGATGTGGAGGGCGAGAGAGAGCGACATCTCTCGGGCCACAGCCTT  
ACAGCTGTGGAGCACGGTATCCTCTGCCGAAACAGAGGTTGGACAAGACCGGAGGGGTCTCCTAGTTC  
+  
FFFFFFFFFFFFFFFFFFFFFFFFFFFFFFFFFFFFFFFFFFFFFFFFFFFFFFFFFFFFFFFFFFFFFFFF  
FFFFFFFFFFFFFFFFFFFFFFFFFFFFFFFFFFFFFFFFFFFFFFFFFFFFFFFFFFFFFFFFFFFFFFFF  
@A00155:342:HHGFNDSXY:1:2405:25021:6402 1:N:0:GAACCTAG+TCCGCATA  
GAAGTCGCTCTCTCGCCCTCCACATCCCTCTCGGCATTGAGATGACCATAGGCCAGAGGTGAGTCC  
TTAAGTGGACACAGCTGATCTAAGGCGGTGTGGTGGGGCATGGGTTTGAACCCCATGACGGTCGGAG  
+  
:FFFFFFFFFFFFFFFFFFFFFFFFFFFFFFFFFFFFFFFFFFFFFFFFFFFFFFFFFFFFFFFFFFFFFFFF  
FFFFFFFFFFFFFFFFFFFFFFFFFFFFFFFFFFFFFFFFFFFFFFFFFFFFFFFFFFFFFFFFFFFFFFFF  
@A00155:342:HHGFNDSXY:1:2405:13187:25520 1:N:0:GAACCTAG+TCCGCATA  
CAAGCCCGGAGTACATCTCCTTTGGAAGTAGGAGACCCCTCCGGTCTTGTCCAACCTCTGTTTCGGCA  
GAGGATACCGTGCTCCACAGCTGTAAGGCTGTGGGCCCGAGAGAAGTCGCTCTCTCTCGCCCTCCACA  
+

FFF:FF:FFFFFFFFFFFFFFFF:F:FFFFFFFFFFFFFFFF:F,FFFFFFFF,F:FF,FFFFF  
FFFFFFFFFFFFF,:FFFF:FFFFFFFF:F:FFFF:FFFF:F:FFFFFFFFFFFFFFFF,FFFF  
@A00155:342:HHGFNDSXY:1:2405:28827:29904 1:N:0:GAACCTAG+TCCGCATA  
AAGGACTCACCTCTGGCCTATGGTCATCTCAATGCCGAGAGGGATGTAGAGGGCGAGAGAGAGCGACT  
TCTCTCGGGCCACAGCCTTACAGCTGTGGAGCACGGTATCCTCTGCCGAAACAGAGGTTGGACAAGA  
+  
FFFFFFFFFFFFFFFFFFFFFFFF,FFFFFFFFFFFFFFFF:FFFFFFFF:F:FFFFFFFFFFFFFFFF  
FFFFFFFFFFFFFFFFFFFFFFFFFFFFFFFFFFFFFFFFFFFFFFFFFFFFFFFFFFFFFFFFFFFFF  
@A00155:342:HHGFNDSXY:1:2406:6768:6042 1:N:0:GAACCTAG+TCCGCATA  
AATGCCGAGAGGGATGTAGAGGGCGAGAGAGAGCGACTTCTCTCGGGCCACAGCCTTACAGCTGTGG  
AGCACGGTATCCTCTGCCGAAACAGAGGTTGGACAAGACCGGAGGGGTCTCCTAGTTCCAAAGGAGAT  
+  
FFFFFFFFFFFFFFFFFFFFFFFF,FFFFFFFF,FFFFFFFF:FFFFFFFF:FFFFFFFF,FF:  
FFFFFFFFFFFFFFFFFFFFFFFF:FF:FFF,:F,FFF:FFFFFFFFFFFFFFFF:FFFFFF:FF  
@A00155:342:HHGFNDSXY:1:2406:4770:9095 1:N:0:GAACCTAG+TCCGCATA  
ACCTCTGTTTCGGCAGAGGATACCGTGCTCCACAGCTGTAAGGCTGTGGGCCCGAGAGAAGTCGCTCT  
CTCTCGCCCTTACATCCCTCTCGGCATTGAGATGACCATAGGCCAGAGGTGAGTCCTTAAGTGGACA  
+  
FFFFFFFFFFFF,FFFFFFFFFFFFFFFFFFFFFFFFFFFFFFFFFFFFFFFFFFFFFFFFFFFFF  
FFFF:FFFFFFFF:FFFFFFFFFFFFFFFFFFFFFFFF,FFFFFF,FFFF,FF:FFFFFFFF:FFF:  
@A00155:342:HHGFNDSXY:1:2406:11369:15170 1:N:0:GAACCTAG+TCCGCATA  
GAGCGACTTCTCTCGGGCCACAGCCTTACAGCTGTGGAGCACGGTATCCTCTGCCGAAACAGAGGTT  
GGACAAGACCGGAGGGGTCTCCTAGTTCCAAAGGAGATGTACTCCGGGCTTGTTACGA  
+  
FFFFFFFFFFFFFFFFFFFFFFFFFFFFFFFFFFFFFFFFFFFFFFFFFFFFFFFFFFFFFFFFFFFFF  
FFFFFFFFFFFFFFFFFFFFFFFF:FFFFFFFFFFFFFFFFFFFFFFFFFFFFFFFFFFFFFFFFFFFF  
@A00155:342:HHGFNDSXY:1:2406:28248:17879 1:N:0:GAACCTAG+TCCGCATA  
TTCTCTCGGGCCACAGCCTTACAGCTGTGGAGCACGGTATCCTCTGCCGAAACAGAGGTTGGACAAG  
ACCGGAGGGGTCTCCTGGTTCCAAAGGAGATGTACTCCGGGCTTGTTACGACCTACCGTGTAAGTCG  
+  
FFFFFFFFFFFFFFFFFFFFFFFFFFFFFFFFFFFFFFFFFFFFFFFFFFFFFFFFFFFFFFFFFFFFF  
:FFFFFFFFFFFFFFFFFFFFFFFFFFFFFFFFFFFFFFFFFFFFFFFFFFFFFFFFFFFFFFFF:FFF  
@A00155:342:HHGFNDSXY:1:2406:3992:18333 1:N:0:GAACCTAG+TCCGCATA  
AGCGACTTCTCTCGGGCCACAGCCTTACAGCTGTGGAGCACGGTATCCTCTGCCGAAACAGAGGTTG  
GACAAGACCGGAGGGGTCTCCTAGTTCCAAAGGAGATGTACTCCGGGCTTGTTACGACCTACCGTGT  
+  
FFFFFFFFFFFFFFFFFFFFFFFFFFFF:FF,FFFFFFFFFFFFFFFFFFFF,,:FFFFFFFFFFFF:F  
FFFFFFFFFFFFFFFFFFFFFFFFFFFFFFFF:F:FFF:FFFFFFFFFFFFFFFF:FF,FFFFFFFF::  
@A00155:342:HHGFNDSXY:1:2406:6479:21668 1:N:0:GAACCTAG+TCCGCATA  
ATCTCAATGCCGAGAGGGATGTGGAGGGCGAGAGAGAGCGACTTCTCTCGGGCCACAGCCTTACAGC  
TGTGGAGCACGGTATCCTCTGCCGAAACAGAGGTTGGACAAGACCGGAGGGGTCTCCTGGTTCCAAAG  
+  
FFFFFFFFFFFF:F:FFFFFFFFFFFFFFFFFFFFFFFFFFFFFFFF,FFFFFFFFFFFFFFFFFFFFF  
FFFFFFFFFFFF:FFFFF:FFFFF:FFFFFFFFFFFFFFFFFFFFFFFFFFFFFFFF:FFFFFFF  
@A00155:342:HHGFNDSXY:1:2406:11098:21840 1:N:0:GAACCTAG+TCCGCATA  
GAGCGACTTCTCTCGGGCCACAGCCTTACAGCTGTGGAGCACGGTATCCTCTGCCGAAACAGAGGTT  
GGACAAGACCGGAGGGGTCTCCTAGTTCCAAAGGAGATGTACTCCGGGCTTGTTACGACCTACC  
+  
FFFFFFFFFFFFFFFFFFFFFFFFFFFFFFFF:FFFFFFFFFFFFFFFFFFFFFFFFFFFFFFFFFFFFF  
FFFFFFFFFFFFFFFFFFFFFFFFFFFFFFFFFFFFFFFFFFFFFFFFFFFFFFFFFFFFFFFFFFFFF  
@A00155:342:HHGFNDSXY:1:2406:27037:23547 1:N:0:GAACCTAG+TCCGCATA  
CTTCTCTCGGGCCACAGCCTTACAGCTGTGGAGCACGGTATCCTCTGCCGAAACAGAGGTTGGACAA  
GACCGGAGGGGTCTCCTAGTTCCAAAGGAGATGTACTCCGGGCTTGTTACGACCTACCGTGTAAGTC  
+

FFFFFFFFFFFFFFFFFFFFFFFFFFFFFFFFFFFFFFFFFFFFFFFFFFFFFFFFFFFFFFFFFFFFFFFF  
FFFFFFFFFFFFFFFFFFFFFFFFFFFFFFFFFFFFFFFFFFFFFFFFFFFFFFFFFFFFFFFFFFFFFFFF  
@A00155:342:HHGFNDSXY:1:2407:28619:35869 1:N:0:GAACCTAG+TCCGCATA  
GAGGGCGAGAGAGAGCGACTTCTCTCGGGCCCACAGCCTTACAGCTGTGGAGCACGGTATCCTCTGCC  
GAAACAGAGGTTGGACAAGACCGGAGGGGTCTCCTAGTTCCAAAGGAGATGTACTCCGGGCTTGTTC  
+  
:F:FF,FFFFFFFFFFFF:FFFFFF:FFFF:FF:FF,F:FFFF,F:FFFF,FFFFFFFF,FF:,FF  
FF:FFFFFFFF:FFFFFF,FFFFFF:F:F:FF:FF:FFFFFFFF,FFFF:FFFFFFFFFFFF,:FFFF  
@A00155:342:HHGFNDSXY:1:2407:9778:36182 1:N:0:GAACCTAG+TCCGCATA  
AGAGAGAGCGACTTCTCTCGGGCCCACAGCCTTACAACTGTGGAGCACGGTATCCTCTGCCGAAACAG  
AGGTTGGACAAGACCGGAGGGGTCTCCTAGTTCCAAAGGAGATGTACTCCGGGCTTGTTCACGACCTA  
+  
FFFFFFFFFFFFFFFFFFFFFFFFFFFFFFFFFFFFFFFFFFFFFFFFFFFFFFFFFFFFFFFFFFFF,FFFFFFFFFFFFFFFF  
FFFFFFFFFFFF,FFFFFFFFFFFFFFFFFFFFFFFFFFFFFFFFFFFFFFFFFFFFFFFFFFFFFFFFFFFF:FFFFFFFF  
@A00155:342:HHGFNDSXY:1:2408:1570:11068 1:N:0:GAACCTAG+TCCGCATA  
TCCTCTGCCGAAACAGAGGTTGGACAAGACCGGAGGGGTCTCCTAGTTCCAAAGGAGATGTACTCCGG  
GCTTGTTCACGACCTACCGTGTAAAGTCGTAGTCTAGTAGGCTACCTGATGAGTCCTTTTTAGGACGAA  
+  
FFFFFFFFFFFFFFFFFFFFFFFFFFFFFFFFFFFFFFFFFFFF:FFFFFFFFF::FFFFFFFFFFFFFFFFFFFFFFFF  
FFFFFFFFFFFFFFFFFFFFFFFFFFFFFFFFFFFFFFFFFFFF:FFFFF:FFFFFFFFFFFF:FFFFFFFFFFFF  
@A00155:342:HHGFNDSXY:1:2408:25138:17691 1:N:0:GAACCTAG+TCCGCATA  
ACCTCTGTTTTCGGCAGAGGATACCGTGCTCCACAGCTGTAAGGCTGTGGGCCCCGAGAGAAGTCGCTCT  
CTCTCGCCCTCCACATCCCTCTCGGCATTGAGATGACCATAGGCCAGAGGAGAGTCCTTAAGTGGACA  
+  
FFFFFFFFFFFFFFFFF:FFFFFFFFFFFFFFFFFFFFFFFFFFFFFFFFFFFFFFFFFFFF:FFFFFFFFFFFF  
FF:FFFFFFFFFFFF:FFFFFFFFFFFF,FFFFFFFFFFFF,F:FFFFFFFFFFFFFFFFFFFFFFFFFFFFF  
@A00155:342:HHGFNDSXY:1:2408:30969:27289 1:N:0:GAACCTAG+TCCGCATA  
CTTCTCTCGGGCCCACAGCCTTACAGCTGTGGAGCACGGTATCCTCTGCCGAAACAGAGGTTGGACAA  
GACCGGAGGGGTCTCCTAGTTCCAAAGGAGATGTACTCCGGGCTTGTTCACGACCTACC  
+  
F,FFFFFFFFFFFFFFFFFFFFFFFFFFFFFFFFFFFFFFFFFFFFFFFFFFFFFFFFFFFFFFFFFFFF  
FFF::FFFFFFFFFFFFFFFFFFFFFFFFFFFFFFFFFFFF:FFFFFFFFFFFF,FFFFFFFFFFFF:FF  
@A00155:342:HHGFNDSXY:1:2408:3622:30780 1:N:0:GAACCTAG+TCCGCATA  
GAGAGAGCGACTTCTCTCGGGCCCACAGCCTTACAGCTGTGGAGCACGGTATCCTCTGCCGAAACAGA  
GGTTGGACAAGACCGGAGGGGTCTCCTAGTTCCAAAGGAGATGTACTCCGGGCTTGTTCACGACCTAC  
+  
FFFFFFFFFFFFFFFFFFFF:FFF,FFFFFF,F:FFFFFFFFFFFF:FFFF:F,FFFFFFFFFFFFFFFFFFFF  
FFFF::FFFFFFF,FFF:FFFFFFFFFFFFFFFFFFFFFFFFFFFF,FF,FFFFFFFFFFFF:FFFFFFFF  
@A00155:342:HHGFNDSXY:1:2408:7970:31078 1:N:0:GAACCTAG+TCCGCATA  
TGTGGAGGGCGAGAGAGAGCGACTTCTCTCGGGCCCACAGCCTTACAGCTGTGGAGCACGGTATCCTC  
TGCCGAAACAGAGGTTGGACAAGACCGGAGGGGTCTCCTAGTTCCAAAGGAGATGTACTCCGGG  
+  
FFFFFFFFFFFFFFFFFFFF:FFFFFFFFFFFF,FFFFFFFFFFFF:,F:FFF:FFFF,FFFFFFFF,FF  
F,FFFFFFFFFFFF:FFFFFFFFFFFF,:F:FFFF,FFFFFFFFFFFF:FFFFFFFFFFFFFFFFFFFF  
@A00155:342:HHGFNDSXY:1:2408:17454:35321 1:N:0:GAACCTAG+TCCGCATA  
CTTCTCTCGGGCCCACAGCCTTACAGCTGTGGAGCACGGTATCCTCTGCCGAAACAGAGGTTGGACAA  
GACCGGAGGGGTCTCCTAGTTCCAAAGGAGATGTACTCCGGGCTTGTTCACGACCTACCGTGTAAAGTC  
+  
FFFFFFFFFFFFFFFFFFFFFFFFFFFFFFFFFFFFFFFFFFFFFFFFFFFFFFFFFFFFFFFFFFFF  
FFFFFFFFFFFFFFFFFFFFFFFFFFFFFFFFFFFFFFFFFFFFFFFFFFFFFFFFFFFFFFFFFFFF  
@A00155:342:HHGFNDSXY:1:2408:21667:35822 1:N:0:GAACCTAG+TCCGCATA  
AGAGAGAGCGACTTCTCTCGGGCCCACAGCCTTACAGCTGTGGAGCACGGTATCCTCTGCCGAAACAG  
AGGTTGGACAAGACCGGAGGGGTCTCCTAGTTCCAAAGGAGATGTACTCCGGGCTTGTTCACGACCTA  
+

FFFFFFFF:FFFFFFFF:FF,FFFFFFFFFFFF:FFFFFFFF:FFFFFFFF:FFFFFFFF:FFFFFFFF,FF  
F,FFFF:FFFF:FFFF:FF:FFFFFFFF:FFFFFFFFFFFF:FFF,F:FFF,FFFF,FFFFFFFF:FFFF  
@A00155:342:HHGFNDSXY:1:2408:17924:35947 1:N:0:GAACCTAG+TCCGCATA  
ACTTCTCTCGGGCCACAGCCTTACAGCTGTGGAGCACGGTATCCTCTGCCGAAACAGAGGTTGGACA  
AGACCGGAGGGGTCTCCTAGTTCCAAAGGAGATGTACTCCGGGCTTGTTACGACCTACCGTGTAAG  
+  
FFFFFFFFFFFFFFFFFFFFFFFFFFFFFFFFFFFFFFFFFFFFFFFFFFFFFFFFFFFFFFFF:FFFFFFFFFFFFFFFF  
FFFFFFFFFFFFFFFFFFFFFFFFFFFFFFFFFFFFFFFFFFFFFFFFFFFFFFFFFFFFFFFF:FFFFFFFF  
@A00155:342:HHGFNDSXY:1:2409:28447:15843 1:N:0:GAACCTAG+TCCGCATA  
TTACAGCTGTGGAGCACGGTATCCTCTGCCGAAACAGAGGTTGGACAAGACCGGAGGGGTCTCCTAGT  
TCCAAAGGAGATGTACTCCGGGCTTGTTACGACCTACCGTGTAAGTCGTAGTCTAGTAGGCTACCTG  
+  
FFFFFFFFFFFFFFFFFFFFFFFFFFFFFFFFFFFFFFFFFFFFFFFFFFFFFFFFFFFFFFFFFFFFFFFF  
FFFFF:FFFFFFFFFFFFFFFFFFFFFFFFFFFFFFFFFFFFFFFFFFFFFFFFFFFFFFFFFFFFFFFF  
@A00155:342:HHGFNDSXY:1:2409:20618:26710 1:N:0:GAACCTAG+TCCGCATA  
AGAGAGAGCGACTTCTCTCGGGCCACAGCCTTACAGCTGTGGAGCACGGTATCCTCTGCCGAAACAG  
AGGTTGGACAAGACCGGAGGGGTCTCCTAGTTCCAAAGGAGATGTACTCCGGGCTTGTTACGACCTA  
+  
FFFFFFFFFFFFFFFFFFFFFFFFFFFFFFFFFFFFFFFFFFFFFFFFFFFFFFFFFFFFFFFFFFFFFFFF  
FFFFFFFFFFFFFFFF:FFFFFFFFFFFFFFFFFFFFFFFFFFFFFFFFFFFFFFFFFFFFFFFFFFFFFFFF  
@A00155:342:HHGFNDSXY:1:2410:21630:16720 1:N:0:GAACCTAG+TCCGCATA  
GGATGTGGAGGGCGAGAGAGAGCGACTTCTCTCGGGCCACAGCCTTACAGCTGTGGAGCACGGTATC  
CTCTGCCGAAACAGAGGTTGGACAAGACCGGAGGGGTCTCCTAGTTCCAAAGGAGATGTACT  
+  
FFFFFFFFFFFFFFFFFFFFFFFFFFFFFFFFFFFFFFFFFFFFFFFFFFFFFFFFFFFFFFFFFFFFFFFF  
FFFFFFFFFFFFFFFFFFFFFFFFFFFFFFFFFFFFFFFFFFFFFFFFFFFFFFFFFFFFFFFFFFFFFFFF  
@A00155:342:HHGFNDSXY:1:2410:12264:19820 1:N:0:GAACCTAG+TCCGCATA  
GAGAGGGATGTGGAGGGCGAGAGAGAGCGACTTCTCTCGGGCCACAGCCTTACAGCTGTGGAGCACG  
GTATCCTCTGCCGAAACAGAGGTTGGACAAGACCGGAGGGGTCTCCTAGTTCCAAAGGAGATGTACTC  
+  
FFFFFFFFFFFFFFFFFFFFFFFFFFFFFFFFFFFFFFFFFFFFFFFFFFFFFFFFFFFFFFFFFFFFFFFF  
FFFFFFFFFFFFFFFFFFFFFFFFFFFFFFFFFFFFFFFFFFFFFFFFFFFFFFFFFFFFFFFFFFFFFFFF  
@A00155:342:HHGFNDSXY:1:2411:13566:1094 1:N:0:GAACCTAG+TCCGCATA  
CTCAATGCCGAGAGGGATGTAGAGGGCGAGAGAGAGCGACTTCTCTCGGGCCACAGCCTTACAGCTG  
TGGAGCACGGTATCCTCTGCCGAAACAGAGGTTGGACAAGACCGGAGGGGTCTCCTAGTTCCAAAGGA  
+  
FFFFFFFFFFFFFFFFFFFFFFFFFFFFFFFFFFFFFFFFFFFFFFFFFFFFFFFFFFFFFFFFFFFFFFFF  
FFFFFFFFFFFFFFFFFFFFFFFFFFFFFFFF:FFFFFFFFFFFFFFFF:FFFFFFFFFFFFFFFFFFFFFFFF  
@A00155:342:HHGFNDSXY:1:2411:27218:29058 1:N:0:GAACCTAG+TCCGCATA  
GGATGTGGAGGGCGAGAGAGAGCGACTTCTCTCGGGCCACAGCCTTACAGCTGTGGAGCACGGTATC  
CTCTGCCGAAACAGAGGTTGGACAAGACCGGAGGGGTCTCCTAGTTCCAAAGGAGATGTACTCC  
+  
FFFFFFFFFFFFFFFFFFFFFFFFFFFFFFFFFFFFFFFFFFFFFFFFFFFFFFFFFFFFFFFFFFFFFFFF  
FFFFFFFFFFFFFFFFFFFFFFFFFFFFFFFFFFFFFFFFFFFFFFFFFFFFFFFFFFFFFFFFFFFFFFFF  
@A00155:342:HHGFNDSXY:1:2411:29071:30264 1:N:0:GAACCTAG+TCCGCATA  
ATCTCAATGCCGAGAGGGATGTAGAGGGCGAGAGAGAGCGACTTCTCTCGGGCCACAGCCTTACAGC  
TGTGGAGCACGGTATCCTCTGCCGAAACAGAGGTTGGACAAGACCGGAGGGGTCTCCTAGTTCCAAAG  
+  
FFFFFFFFFFFFFFFFFFFFFFFFFFFFFFFF,FFFFFFFFFFFFFFFFFFFFFFFF:FFFFFFFFFFFFFFFF  
FFFFFFFFFFFFFFFFFFFFFFFFFFFFFFFFFFFFFFFFFFFFFFFFFFFFFFFFFFFFFFFFFFFFFFFF  
@A00155:342:HHGFNDSXY:1:2412:20826:4836 1:N:0:GAACCTAG+TCCGCATA  
GGCATTGAGATGACCATAGGCCAGAGGTGAGTCCTTAAGTGGACACAGCTGATCTAAGGCGGTGTGGC  
GGGGCATGGGTTTGAACCCCATGACGGTCGGAGTCTAGTAGGCTCCCTGATGAGTCCGTTCCAAGGA  
+



FFFFFFFFFFFFFFFFFFFFFFFFFFFFFFFFFFFFFFFFFFFFFFFFFFFFFFFFFFFFFFFFFFFFFFFF  
FFFFFFFFFFFFFFFFFFFFFFFFFFFFFFFFFFFFFFFFFFFFFFFFFFFFFFFFFFFFFFFFFFFFFFFF  
@A00155:342:HHGFNDSXY:1:2412:22896:11177 1:N:0:GAACCTAG+TCCGCATA  
GGCATTGAGATGACCATAGGCCAGAGGTGAGTCCTTAAGTGGACACAGCTGATCTAAGGCGGTGTGGC  
GGGGCATGGGTTTGAACCCCATGACGGTCGGAGTCTAGTAGGCTCCCTGATGAGTCCGTTCCAAGGA  
+  
FFFFFFFFFFFFFFFFFFFFFFFFFFFFFFFFFFFFFFFFFFFFFFFFFFFFFFFFFFFFFFFFFFFFFFFF  
FFFFFFFFFFFFFFFFFFFFFFFFFFFFFFFFFFFFFFFFFFFFFFFFFFFFFFFFFFFFFFFFFFFFFFFF  
@A00155:342:HHGFNDSXY:1:2412:10167:20823 1:N:0:GAACCTAG+TCCGCATA  
GGATGTGGAGGGCGAGAGAGAGCGACTTCTCTCGGGCCACAGCCTTACAGCTGTGGAGCACGGTATC  
CTCTGCCGAAACAGAGGTTGGACAAGACCGGAGGGGTCTCCTGGTTCCAAAGGAGATGTACTCC  
+  
FFFFFFFFFFFFFFFFFFFFFFFFFFFFFFFFFFFFFFFFFFFFFFFFFFFFFFFFFFFFFFFFFFFFFFFF  
FFFFFFFFFFFFFFFFFFFFFFFFFFFFFFFFFFFFFFFFFFFFFFFFFFFFFFFFFFFFFFFFFFFFFFFF  
@A00155:342:HHGFNDSXY:1:2412:26268:23156 1:N:0:GAACCTAG+TCCGCATA  
CAATGCCGAGAGGGATGTGGAGGGCGAGAGAGAGCGACTTCTCTCGGGCCACAGCCTTACAGCTGTG  
GAGCACGGTATCCTCTGCCGAAACAGAGGTTGGACAAGACCGGAGGGGTCTCCTAGTTCCAAAGGAGA  
+  
FFFFFFFFFFFFFFFFFFFFFFFFFFFFFFFFFFFFFFFFFFFFFFFFFFFFFFFFFFFFFFFFFFFFFFFF  
FFFFFFFFFFFFFFFFFFFFFFFFFFFFFFFFFFFFFFFFFFFFFFFFFFFFFFFFFFFFFFFFFFFFFFFF  
@A00155:342:HHGFNDSXY:1:2412:25310:27978 1:N:0:GAACCTAG+TCCGCATA  
AGCCTTACAGCTGTGGAGCACGGTATCCTCTGCCGAAACAGAGGTTGGACAAGACCGGAGGGGTCTCC  
TAGTTCCAAAGGAGATGTACTCCGGGCTTGTTACGACCTACCGTGTAAGTCGTAGTCTAGTAGGCTA  
+  
FFFFFFFFFFFFFFFFFFFFFFFFFFFFFFFFFFFFFFFFFFFFFFFFFFFFFFFFFFFFFFFFFFFFFFFF  
FFFFFFFFFFFFFFFFFFFFFFFFFFFFFFFFFFFFFFFFFFFFFFFFFFFFFFFFFFFFFFFFFFFFFFFF  
@A00155:342:HHGFNDSXY:1:2412:24668:29590 1:N:0:GAACCTAG+TCCGCATA  
AGCCTTACAGCTGTGGAGCACGGTATCCTCTGCCGAAACAGAGGTTGGACAAGACCGGAGGGGTCTCC  
TAGTTCCAAAGGAGATGTACTCCGGGCTTGTTACGACCTACCGTGTAAGTCGTAGTCTAGTAGGCTA  
+  
FFFFFFFFFFFFFFFFFFFFFFFFFFFFFFFFFFFFFFFFFFFFFFFFFFFFFFFFFFFFFFFFFFFFFFFF  
FFFFFFFFFFFFFFFFFFFFFFFFFFFFFFFFFFFFFFFFFFFFFFFFFFFFFFFFFFFFFFFFFFFFFFFF  
@A00155:342:HHGFNDSXY:1:2413:10474:13463 1:N:0:GAACCTAG+TCCGCATA  
CTTCTCTCGGGCCACAGCCTTACAGCTGTGGAGCACGGTATCCTCTGCCGAAACAGAGGTTGGACAA  
GACCGGAGGGGTCTCCTAGTTCCAAAGGAGATGTACTCCGGGCTTGTTACGACCTACCGTGTAAGTC  
+  
FFFFFFFFFFFFFFFFFFFFFFFFFFFFFFFFFFFFFFFFFFFFFFFFFFFFFFFFFFFFFFFFFFFFFFFF  
FFFFFFFFFFFFFFFFFFFFFFFFFFFFFFFFFFFFFFFFFFFFFFFFFFFFFFFFFFFFFFFFFFFFFFFF  
@A00155:342:HHGFNDSXY:1:2413:19199:19742 1:N:0:GAACCTAG+TCCGCATA  
CTTCTCTCGGGCCACAGCCTTACAGCTGTGGAGCACGGTATCCTCTGCCGAAACAGAGGTTGGACAA  
GACCGGAGGGGTCTCCTAGTTCCAAAGGAGATGTACTCCGGGCTTGTTACGACCTACCGTGTAAGTC  
+  
FFFFFFFFFFFFFFFFFFFFFFFFFFFFFFFFFFFFFFFFFFFFFFFFFFFFFFFFFFFFFFFFFFFFFFFF  
FFFFFFFFFFFFFFFFFFFFFFFFFFFFFFFFFFFFFFFFFFFFFFFFFFFFFFFFFFFFFFFFFFFFFFFF  
@A00155:342:HHGFNDSXY:1:2413:28239:21371 1:N:0:GAACCTAG+TCCGCATA  
GGATGTAGAGGGCGAGAGAGAGCGACTTCTCTCGGGCCACAGCCTTACAGCTGTGGAGCACGGTATC  
CTCTGCCGAAACAGAGGTTGGACAAGACCGGAGGGGTCTCCTAGTTCCAAAGGAGATGTACTCC  
+  
FFFFFFFFFFFFFFFFFFFFFFFFFFFFFFFFFFFFFFFFFFFFFFFFFFFFFFFFFFFFFFFFFFFFFFFF  
FFFFFFFFFFFFFFFFFFFFFFFFFFFFFFFFFFFFFFFFFFFFFFFFFFFFFFFFFFFFFFFFFFFFFFFF  
@A00155:342:HHGFNDSXY:1:2413:3441:26209 1:N:0:GAACCTAG+TCCGCATA  
CTTCTCTCGGGCCACAGCCTTACAGCTGTGGAGCACGGTATCCTCTGCCGAAACAGAGGTTGGACAA  
GACCGGAGGGGTCTCCTGGTTCCAAAGGAGATGTACTCCGGGCTTGTTACGACCTACCGTGTAAGTC  
+

FFFFFFFFFFFFFFFFFFFFFFFFFFFFFFFFFFFFFFFFFFFFFFFFFFFFFFFFFFFFFFFFFFFFF:FFFFFFFFFFFFFF  
FFFFFFFFFFFFFFFFFFFFFFFFFFFFFFFFFFFFFFFFFFFFFFFFFFFFFFFFFFFFFFFFFFFFF:FFF:FFFFFFFFFFFF  
@A00155:342:HHGFNDSXY:1:2413:4517:27884 1:N:0:GAACCTAG+TCCGCATA  
AGAGAGAGCGACTTCTCTCGGGCCCACAGCCTTACAGCTGTGGAGCACGGTATCCTCTGCCGAAACAG  
AGGTTGGACAAGACCGGAGGGGTCTCCTGGTTCCAAAGGAGATGTACTCCGGGCTTGTTTCACGACCTA  
+  
FFFFFFFFFFFFFFFF,F:FFF:FFFFFFFFFFFFFFFFFFFFFFFF:F,FFFFF,FFFFFFFFFF,FFFFFFF  
FFFFF:FFFFF,FFFFFFFFF:FFFFFFFFFFFFFFFFFFFFFFFFFFFFFFFF,FF:FF:FFFF:FFFFFFF  
@A00155:342:HHGFNDSXY:1:2414:3314:16344 1:N:0:GAACCTAG+TCCGCATA  
CTTCTCTCGGGCCCACAGCCTTACAGCTGTGGAGCACGGTATCCTCTGCCGAAACAGAGGTTGGACAA  
GACCGGAGGGGTCTCCTGGTTCCAAAGGAGATGTACTCCGGGCTTGTTTCACGACCTACCGTGTAAGTC  
+  
FFFFFFFFFFFFFFFFFFFFFFFFFFFFFFFFFFFFFFFFFFFFFFFFFFFFFFFFFFFFFFFFFFFFF  
FFF:FFFFFFFFFFFFFFFFFFFFFFFFFFFFFFFFFFFFFFFF:FFFFFFFFFFFFFFFFF:FFFFFFFFFFFFFFF  
@A00155:342:HHGFNDSXY:1:2414:4218:17503 1:N:0:GAACCTAG+TCCGCATA  
GCCACAGCCTTACAGCTGTGGAGCACGGTATCCTCTGCCGAAACAGAGGTTGGACAAGACCGGAGGG  
GTCTCCTAGTTCCAAAGGAGATGTACTCCGGGCTTGTTTCACGACCTACCGTGTAAGTCGTAGTCTAGT  
+  
FFFFFFFFFFFFFFFFFFFFFFFFFFFFFFFFFFFFFFFFFFFFFFFFFFFFFFFFFFFFFFFFFFFFF  
FFFFFFFFFFFFFFFFFFFFFFFFFFFFFFFFFFFFFFFFFFFFFFFFFFFFFFFFFFFFFFFFFFFFF:FFFFFFFFFFFFFFF  
@A00155:342:HHGFNDSXY:1:2414:32045:20290 1:N:0:GAACCTAG+TCCGCATA  
ACTTCTCTCGGGCCCACAGCCTTACAGCTGTGGAGCACGGTATCCTCTGCCGAAACAGAGGTTGGACA  
AGACCGGAGGGGTCTCCTAGTTCCAAAGGAGATGTACTCCGACTTGTTTCACGACCTACCGTGTAAGT  
+  
FFFFFFFFFFFFFFFFFFFFFFFFFFFFFFFFFFFFFFFFFFFFFFFFFFFFFFFFFFFFFFFFFFFFF  
FFFFFFFFFFFFFFFFFFFFFFFFFFFFFFFFFFFFFFFFFFFFFFFFFFFFFFFFFFFFFFFFFFFFF:FFFFFFFFFFFFFFF  
@A00155:342:HHGFNDSXY:1:2414:16631:28322 1:N:0:GAACCTAG+TCCGCATA  
TCTCTGCCGAAACAGAGGTTGGACAAGACCGGAGGGGTCTCCTAGTTCCAAAGGAGATGTACTCCGG  
GCTTGTTTCACGACCTACCGTGTAAGTCGTAGTCTAGTAGGCTACCTGACGAGTCCTTTTTAGGACGAA  
+  
FFFFF,FFFFFFFFFFFFFFF:FFFFFFFFFFFFFFF:FFFFFFFFFFFFFFF:FFFFFFFFFFFFFFF  
FFFFF:FF:FFFFFFFFFFFFFFFFFFFFFFFFFFFFFFFFFFFFFFFFFFFFFFFFFFFFFFFFFFFFF  
@A00155:342:HHGFNDSXY:1:2414:4119:28354 1:N:0:GAACCTAG+TCCGCATA  
CCCACAGCCTTACAGCTGTGGAGCACGGTATCCTCTGCCGAAACAGAGGTTGGACAAGACCGGAGGGG  
TCTCCTAGTTCCAAAGGAGATGTACTCCGGGCTTGTTTCACGACCTACCGTGTAAGTCGTAGTCTAGTA  
+  
FFFFFFFFFFFFFFFFFFFFFFFFFFFFFFFFFFFF,FFFF,FFFFFFFFFFFFF:FFF:FFFF:FFFFFFFFF:FFFFFFF  
FFFFFFFFFFFFFFFFFFFFFFFFFFFFFFFFFFFF,FFF,FFFFFFFFFFFFFFFFF,FFFF,FFFFF,F,FFFFFFF  
@A00155:342:HHGFNDSXY:1:2414:23068:31829 1:N:0:GAACCTAG+TCCGCATA  
TTCTCTCGGGCCCACAGCCTTACAGCTGTGGAGCACGGTATCCTCTGCCGAAACAGAGGTTGGACAAG  
ACCGGAGGGGTCTCCTAGTTCCAAAGGAGATGTACTCCGGGCTTGTTTCACGACCTACCGTGTAAGTCG  
+  
FFFFFFFFFFFFFFFFFFFFFFFFFFFFFFFFFFFFFFFFFFFFFFFFFFFFFFFFFFFFFFFFFFFFF  
FFFFFFFFFFFFFFFFFFFFFFFFFFFFFFFFFFFFFFFFFFFFFFFFFFFFFFFFFFFFFFFFFFFFF:FFFFFFFFFFFFFFFFF  
@A00155:342:HHGFNDSXY:1:2415:10185:8516 1:N:0:GAACCTAG+TCCGCATA  
AGAGAGAGCGACTTCTCTCGGGCCCACAGCCTTACAGCTGTGGAGCACGGTATCCTCTGCCGAAACAG  
AGGTTGGACAAGACCGGAGGGGTCTCCTAGTTCCAAAGGAGATGTACTCCGGGCTTGTTTCACGACCT  
+  
F:FFFFFFFFFFFFFFFFFFFFFFFFFFFFFFFFFFFFFFFFFFFFFFFFFFFFFFFFFFFFFFFFFFFFF  
FFFFFFFFFFFFFFFFFFFFFFFFFFFFFFFFFFFFFFFFFFFFFFFFFFFFFFFFFFFFFFFFFFFFF  
@A00155:342:HHGFNDSXY:1:2415:28628:14278 1:N:0:GAACCTAG+TCCGCATA  
CTTCTCTCGGGCCCACAGCCTTACAGCTGTGGAGCACGGTATCCTCTGCCGAAACAGAGGTTGGACAA  
GACCGGAGGGGTCTCCTGGTTCCAAAGGAGATGTACTCCGGGCTTGTTTCACGACCTACCGTGTAAGTC  
+

FFFFFFFFFFFFFFFFFFFFFFFFFFFFFFFFFFFFFFFFFFFFFFFFFFFFFFFFFFFFFFFFFFFFFFFF  
FFFFFFFFFFFFFFFFFFFFFFFFFFFFFFFFFFFFFFFFFFFFFFFFFFFFFFFFFFFFFFFFFFFFFFFF  
@A00155:342:HHGFNDSXY:1:2415:19379:20870 1:N:0:GAACCTAG+TCCGCATA  
TGTTTCGGCAGAGGATACCGTGCTCCACAGCTGTAAGGCTGTGGGCCCGAGAGAAGTCGCTCTCTCTC  
GCCCTCCACATCCCTCTCGGCATTGAGATGACCATAGGCCAGAGGTGAGTCCTTAAGTGGACACAGCT  
+  
FFFFFFFFFFFFFFFFFFFFFFFFFFFFFFFFFFFFFFFFFFFFFFFFFFFFFFFFFFFFFFFFFFFFFFFF  
FFFFFFFFFFFFFFFFFFFFFFFFFFFFFFFFFFFFFFFFFFFFFFFFFFFFFFFFFFFFFFFFFFFFFFFF  
@A00155:342:HHGFNDSXY:1:2416:32868:4429 1:N:0:GAACCTAG+TCCGCATA  
GATGTGGAGGGCGAGAGAGAGCGACTTCTCTCGGGCCACAGCCTTACAGCTGTGGAGCACGGTATCC  
TCTGCCGAAACAGAGGTTGGACAAGACCGGAGGGGTCTCCTAGTTCCAAAGGAGATGTACTCCGGGCT  
+  
FFFFFFFFFFFFFFFFFFFFFFFFFFFFFFFFFFFFFFFFFFFFFFFFFFFFFFFFFFFFFFFFFFFFFFFF  
FFFFFFFFFFFFFFFFFFFFFFFFFFFFFFFFFFFFFFFFFFFFFFFFFFFFFFFFFFFFFFFFFFFFFFFF  
@A00155:342:HHGFNDSXY:1:2416:27046:9471 1:N:0:GAACCTAG+TCCGCATA  
TATCCTCTGCCGAAACAGAGGTTGGACAAGACCGGAGGGGTCTCCTGGTTCCAAAGGAGATGTACTCC  
GGGCTTGTTACACGACCTACCGTGTAAGTCGTAGTCTAGTAGGCTACCTGACGAGTCCTTTTAGGACG  
+  
FFFFFFFFFFFFFFFFFFFFFFFFFFFFFFFFFFFFFFFFFFFFFFFFFFFFFFFFFFFFFFFFFFFFFFFF  
FFFFFFFFFFFFFFFFFFFFFFFFFFFFFFFFFFFFFFFFFFFFFFFFFFFFFFFFFFFFFFFFFFFFFFFF  
@A00155:342:HHGFNDSXY:1:2416:6054:22717 1:N:0:GAACCTAG+TCCGCATA  
CCAACCTCTGTTTCGGCAGAGGATACCGTGCTCCACAGCTGTAAGGCTGTGGGCCCGAGAGAAGTCGC  
TCTCTCTCGCCCTCCACATCCCTCTCGGCATTGAGATGACCATAGGCCAGAGGCGAGTCCTTAA  
+  
:FFFFFFFFFFFFFFFFFFFFFFFFFFFFFFFFFFFFFFFFFFFFFFFFFFFFFFFFFFFFFFFFFFFFFFFF  
:FFFFFF:FFFFFFFFFFFFFFFFFFFFFFFFFFFFFFFFFFFFFFFFFFFFFFFFFFFFFFFFFFFFFFFF  
@A00155:342:HHGFNDSXY:1:2417:28537:3505 1:N:0:GAACCTAG+TCCGCATA  
ACAGCTGTGGAGCACGGTATCCTCTGCCGAAACAGAGGTTGGACAAGACCGGAGGGGTCTCCTAGTTC  
CAAAGGAGATGTACTCCGGGCTTGTTACACGACCTACCGTGTAAGTCGTAGTCTAGTAGGCTACCTGAC  
+  
FFFFFFFFFFFFFFFFFFFFFFFFFFFFFFFFFFFFFFFFFFFFFFFFFFFFFFFFFFFFFFFFFFFFFFFF  
FFFFFFFFFFFFFFFFFFFFFFFFFFFFFFFFFFFFFFFFFFFFFFFFFFFFFFFFFFFFFFFFFFFFFFFF  
@A00155:342:HHGFNDSXY:1:2417:17228:5650 1:N:0:GAACCTAG+TCCGCATA  
GAGCGACTTCTCTCGGGCCACAGCCTTACAGCTGTGGAGCACGGTATCCTCTGCCGAAACAGAGGTT  
GGACAAGACCGGAGGGGTCTCCTAGTTCCAAAGGAGATGTACTCCGGGCTTGTTACACGACCTACCGTG  
+  
FFFFFFFFFFFFFFFFFFFFFFFFFFFFFFFFFFFFFFFFFFFFFFFFFFFFFFFFFFFFFFFFFFFFFFFF  
FFFFFFF:FFFFFFFFFFFFFFFFFFFFFFFFFFFFFFFFFFFFFFFFFFFFFFFFFFFFFFFFFFFFFFFF  
@A00155:342:HHGFNDSXY:1:2417:18439:6183 1:N:0:GAACCTAG+TCCGCATA  
ACCTCTGTTTCGGCAGAGGATACCGTGCTCCACAGCTGTAAGGCTGTGGGCCCGAGAGAAGTCGCTCT  
CTCTCGCCCTCCACATCCCTCTCGGCATTGAGATGACCATAGGCCAGAGGTGAGTCCTTAAGTGGACA  
+  
FFFFFFFFFFFFFFFFFFFFFFFFFFFFFFFFFFFFFFFFFFFFFFFFFFFFFFFFFFFFFFFFFFFFFFFF  
FFFFF:FFFFFFFFFFFFFFFFFFFFFFFFFFFFFFFFFFFFFFFFFFFFFFFFFFFFFFFFFFFFFFFF  
@A00155:342:HHGFNDSXY:1:2417:19009:6825 1:N:0:GAACCTAG+TCCGCATA  
ACCTCTGTTTCGGCAGAGGATACCGTGCTCCACAGCTGTAAGGCTGTGGGCCCGAGAGAAGTCGCTCT  
CTCTCGCCCTCCACATCCCTCTCGGCATTGAGATGACCATAGGCCAGAGGTGAGTCCTTAAGTGGACA  
+  
FFFFFFFFFFFFFFFFFFFFFFFFFFFFFFFFFFFFFFFFFFFFFFFFFFFFFFFFFFFFFFFFFFFFFFFF  
FFFFF:FFFFFFFFFFFFFFFFFFFFFFFFFFFFFFFFFFFFFFFFFFFFFFFFFFFFFFFFFFFFFFFF  
@A00155:342:HHGFNDSXY:1:2417:30201:20353 1:N:0:GAACCTAG+TCCGCATA  
GAGAGGGATGTGGAGGGCGAGAGAGAGCGACTTCTCTCGGGCCACAGCCTTACAGCTGTGGAGCACG  
GTATCCTCTGCCGAAACAGAGGTTGGACAAGACCGGAGGGGTCTCCTAGTTCCAAAGGAGATGTACTC  
+

FF:FFFFFFFFFFFFFFFFFFFFFFFFFFFFFFFFFFFFFFFFFFFFFFFFFFFFFFFFFFFFFFFFFFFFF:FFFFFFFFFFFFFFFFFFFF  
FF:FFFFFFFFFFFFFFFFFFFFFFFFFFFFFFFFFFFFFFFFFFFFFFFFFFFFFFFFFFFFFFFFFFFFF@A00155:342:HHGFNDSXY:1:2417:10348:25488 1:N:0:GAACCTAG+TCCGCATA  
TTAAGGACTCTCCTCTGGCCTATGGTCATCTCAATGCCGAGAGGGATGTGGAGGGCGAGAGAGAGCGA  
CTTCTCTCGGGCCCACAGCCTTACAGCTGTGGAGCACGGTATCCTCTGCCGAAACAGAGGTTGGACAA  
+  
:,FF:FF,:FFFF:F:F,F,F:F:,FFFFFFFFF,FFFFFF,:FFF::FFFFFFFFFFFFFFFFFFFFF  
FFF:FFFFFFFFFFFFFFFFFFFFF:FF,F:FFFFFFFFFFFFFFFFFFFF:FFFFFFFFFFFFFFFFFFFFF  
@A00155:342:HHGFNDSXY:1:2419:7211:3552 1:N:0:GAACCTAG+TCCGCATA  
ACCTCTGTTTCGGCAGAGGATACCGTGCTCCACAGCTGTAAGGCTGTGGCCCCGAGAGAAGTCGCTCT  
CTCTCGCCCTTACATCCCTCTCGGCATTGAGATGACCATAGGCCAGAGGTGAGTCCTTAAGTGGACA  
+  
FFFFFFFFFFFFFFFFFFFF:FFFFFFFFFFFFFFFFFFFFFFFFFFFFFFFFFFFFFFFFFFFFFFFFFFFFF  
FFFFFFFFFFFFFFFFFFFFFFFFFFFFF:FFFFFFFFFFFFFFFFFFFFFFFFFFFFFFFFFFFFFFFFFFFFF  
@A00155:342:HHGFNDSXY:1:2419:20943:25332 1:N:0:GAACCTAG+TCCGCATA  
CCCACAGCCTTACAGCTGTGGAGCACGGTATCCTCTGCCGAAACAGAGGTTGGACAAGACCGGAGGGG  
TCTCCTAGTTCAAAGGAGATGTACTCCGGGCTTGTTACGACCTACCGTGTAAGTCGTAGTCTAGTA  
+  
:FFFFFFFFFFFFFFF:F:FFFFFFFFFFFFFFF::FF,FF:FFFFFFF,FF:FF,,F:FF,FFF:,FFFFF  
:FFF:,F,FF:FFFFF:FFFFFFFFFFFFFFF:FFFFFFFFFFFFF,,FFFF:FFF::FFF:F:FFF:F  
@A00155:342:HHGFNDSXY:1:2420:2862:8547 1:N:0:GAACCTAG+TCCGCATA  
AGCGACTTCTCTCGGGCCCACAGCCTTACAGCTGTGGAGCACGGTATCCTCTGCCGAAACAGAGGTTG  
GACAAGACCGGAGGGGTCTCCTAGTTCAAAGGAGATGTACTCCGGGCTTGTTACGACCTACCGTGT  
+  
FFFFFFFFFFFFFFFFFFFFFFFFFFFFFFFFFFFFFFFFFFFFFFFFFFFFFFFFFFFFFFFFFFFFF:F,:FF  
FFFFFFFFFFFFFFFFFFFFFFFFFFFFF:FFFFFFFFFFFFF,FFFFF:FFFFFFFFFFFFFFFFFFFFF:FF  
@A00155:342:HHGFNDSXY:1:2420:28700:21731 1:N:0:GAACCTAG+TCCGCATA  
CTCAATGCCGAGAGGGATGTAGAGGGCGAGAGAGAGCGACTTCTCTCGGGCCCACAGCCTTACAGCTG  
TGGAGCACGGTATCCTCTGCCGAAACAGAGGTTGGACAAGACCGGAGGGGTCTCCTAGTTCAAAGGA  
+  
FFFFFFFFFFFFFFF:FFFFFFFFFFFFFFFFFFFFFFFFFFFFFFFFFFFFFFFFFFFFFFFFFFFFFFFFFFFFF  
FFFFFFFFFFFFFFFFFFFFFFFFFFFFF:FFFFFFFFFFFFFFFFFFFFFFFFFFFFFFFFFFFFFFFFFFFFF:FFF  
@A00155:342:HHGFNDSXY:1:2420:23176:22905 1:N:0:GAACCTAG+TCCGCATA  
CTTCTCTCGGGCCCACAGCTTTACAGCTGTGGAGCACGGTATCCTCTGCCGAAACAGAGGTTGGACAA  
GACCGGAGGGGTCTCCTAGTTCAAAGGAGATGTACTCCGGGCTTGTTACGACCTACC  
+  
FFFFFFFFFFFFFFFFFFFFFFFFFFFFFFFFFFFFFFFFFFFFFFFFFFFFFFFFFFFFFFFFFFFFF:FFFFFFFFFFFFFFF  
FFFFFFFFFFFFFFFFFFFFFFFFFFFFF:FFFFFFFFFFFFFFFFFFFFFFFFFFFFFFFFFFFFFFFFFFFFF  
@A00155:342:HHGFNDSXY:1:2421:25292:2487 1:N:0:GAACCTAG+TCCGCATA  
GAGCGACTTCTCTCGGGCCCACAGCCTTACAGCTGTGGAGCACGGTATCCTCTGCCGAAACAGAGGTT  
GGACAAGACCGGAGGGGTCTCCTAGTTCAAAGGAGATGTACTCCGGGCTTGTTACGACCTACCGTG  
+  
FFFFFFFFFFFFFFFFFFFFFFFFFFFFFFFFFFFFFFFFFFFFFFFFFFFFFFFFFFFFFFFFFFFFF  
FFFFFFFFFFFFFFFFFFFFFFFFFFFFF:FFFFFFFFFFFFFFFFFFFFFFFFFFFFFFFFFFFFFFFFFFFFF  
@A00155:342:HHGFNDSXY:1:2421:21983:15389 1:N:0:GAACCTAG+TCCGCATA  
CCTCTGGCCTATGGTCATCTCAATGCCGAGAGGGATGTGAAGGGCGAGAGAGAGCGACTTCTCTCGGG  
CCCACAGCCTTACAGCTGTGGAGCACGGTATCCTCTGCCGAAACAGAGGTTGGACAAGACCGGAGGGG  
+  
FFFFFFFFFFFFFFFFFFFFFFFFFFFFFFFFFFFFFFFFFFFFFFFFFFFFFFFFFFFFFFFFFFFFF  
FFFFFFFFFFFFFFFFFFFFFFFFFFFFF:FFFFFFFFFFFFFFFFFFFFFFFFFFFFFFFFFFFFFFFFFFFFF  
@A00155:342:HHGFNDSXY:1:2421:6858:15530 1:N:0:GAACCTAG+TCCGCATA  
TGGTCATCTCAATGCCGAGAGGGATGTGGAGGGCGAGAGAGAGCGACTTCTCTCGGGCCCACAGCCTT  
ACAGCTGTGGAGCACGGTATCCTCTGCCGAAACAGAGGTTGGACAAGACCGGAGGGGTCTCCTAGTTC

```
FFFFFFFFFFFFFFFFFFFFFFFFFFFFFFFFFFFFFFFFFFFFFFFFFFFFFFFFFFFFF:FF  
FFFFFFFFFFFFFFFFFFFFFFFFFFFFFFFFFFFFFFFFFFFFFFFFFFFFFFFFFFFFFF:  
@A00155:342:HHGFNDSXY:1:2421:19669:27539 1:N:0:GAACCTAG+TCCGCATA  
TGTCCTACTTAAGGACTCACCTCTGGCCTATGGTCATCTCAATGCCGAGAGGGATGTGAAGGGCGAGAG  
AGAGCGACTTCTCTCGGGCCCACAGCCTTACAGCTGTGGAGCACGGTATCCTCTGCCGAAACAGAGGT  
+  
FFFFFFFFFFFFFFFFFFFFFFFFFFFFFFFFFFFFFFFFFFFFFFFFFFFFFFFFFFFFFF  
FFFFFFFFFFFFFFFFFFFFFFFFFFFFFFFFFFFFFFFFFFFFFFFFFFFFFFFFFFFFFF  
@A00155:342:HHGFNDSXY:1:2422:32235:1141 1:N:0:GAACCTAG+TCCGCATA  
TGTAGAGGGCGAGAGAGAGCGACTTCTCTCGGGCCCACAGCCTTACAGCTGTGGAGCACGGTATCCTO  
TGCCGAAACAGAGGTTGGACAAGACCGGAGGGGTCTCCTAGTTCAAAGGAGATGTACTCCGGG  
+  
:FFFFFFFFFFFFFFFFFFFFFFFFFFFFFFFFFFFFFFFFFFFFFFFFFFFFFFFFFFFFFF  
FFFFFFFFFFFFFFFFFFFFFFFFFFFFFFFFFFFFFFFFFFFFFFFFFFFFFFFFFFFFFF  
@A00155:342:HHGFNDSXY:1:2422:9073:2174 1:N:0:GAACCTAG+TCCGCATA  
TGGTCATCTCAATGCCGAGAGGGATGTGGAGGGCGAAAGAGAGCGACTTCTCTCGGGCCCACAGCCTT  
ACAGCTGTGGAGCACGGTATCCTCTGCCGAAACAGAGGTTGGACAAGACCGGAGGGGTCTCC  
+  
FFFFFFFFFFFFFFFFFFFFFFFFFFFFFFFFFFFFFFFFFFFFFFFFFFFFFFFFFFFFFF  
FFFFFFFFFFFFFFFFFFFFFFFFFFFFFFFFFFFFFFFFFFFFFFFFFFFFFFFFFFFFFF  
@A00155:342:HHGFNDSXY:1:2422:4580:3662 1:N:0:GAACCTAG+TCCGCATA  
CTCTGGCCTATGGTCATCTCAATGCCGAGAGGGATGTGAAGGGCGAGAGAGAGCGACTTCTCTCGGGC  
CCACAGCCTTACAGCTGTGGAGCACGGTATCCTCTGCCGAAACAGAGGTTGGACAAGACCGGAGGGGT  
+  
FFFFF:FFFFFFFFFFFFFFFFFFFFFFFFFFFFFFFFFFFFFFFFFFFFFFFFFFFFFF  
FFF:FFFFFFFF,FFFFFFFFFFFFFFFFFFFFFFFFFFFFFFFFFFFFFFFFFFFFFF:FFF  
@A00155:342:HHGFNDSXY:1:2422:28275:10692 1:N:0:GAACCTAG+TCCGCATA  
AGCGACTTCTCTCGGGCCCACAGCCTTACAGCTGTGGAGCACGGTATCCTCTGCCGAAACAGAGGTTG  
GACAAGACCGGAGGGGTCTCCTAGTTCAAAGGAGATGTACTCCGGGCTTGTTACGACCTACCGTGT  
+  
FFFFFFFFFFFFFFFFFFFFFF:FFFFFFFFFFFFFFFFFFFFFFFFFFFFFFFFFFFFFF:FFFFF  
FFFFFFFFFFFFFFFFFFFFFFFFFFFFFFFFFFFFFFFFFFFFFFFFFFFFFF,F  
@A00155:342:HHGFNDSXY:1:2422:27082:15076 1:N:0:GAACCTAG+TCCGCATA  
TCTCTCGGGCCCACAGCCTTACAGCTGTGGAGCACGGTATCCTCTGCCGAAACAGAGGTTGGACAAGA  
CCGAGGGGTCTCCTGGTTCAAAGGAGATGTACTCCGGGCTTGTTACGACCTACCGTGTAAAGTCGT  
+  
FFFFFFFFFFFFFFFFFFFFFFFFFFFFFFFFFFFFFFFFFFFFFFFFFFFFFFFFFFFFFF  
FFFFFFFFFFFFFFFFFFFFFFFFFFFFFFFFFFFFFFFFFFFFFFFFFFFFFFFFFFFFFF  
@A00155:342:HHGFNDSXY:1:2422:28537:17942 1:N:0:GAACCTAG+TCCGCATA  
TAGATCAGCTGTGTCCACTTAAGGACTCACCTCTGGCCTATGGTCATCTCAATGCCGAGAGGGATGTG  
AAGGGCGAGAGAGAGCGACTTCTCTCGGGCCCACAGCCTTACAGCTGTGGAGCACGGTATCCTCT  
+  
,FFF:FFFF:FF,FF:FF,FFFF,FFF:F:FFF:FFF:F:F,,,FFFF:FF:F,,,,F:F:FFFFFF  
::FF:FFFFFFF:FFFF:,FF:F:F:FFF::F:F,,F:F:F:,FF,,FFF:, :FFF,FF,FFFF  
@A00155:342:HHGFNDSXY:1:2422:26304:29857 1:N:0:GAACCTAG+TCCGCATA  
TCAATGCCGAGAGGGATGTAGAGGGCGAGAGAGAGCGACTTCTCTCGGGCCCACAGCCTTACAGCTGT  
GGAGCACGGTATCCTCTGCCGAAACAGAGGTTGGACAAGACCGGAGGGGTCTCCTAGTTCAAAGGAG  
+  
FFFFFFFFFFFFFFFFFFFFFF:FFFFFFFFFFFFFFFFFFFFFFFFFFFFFFFFFFFFFF  
FFFFFFFFFFFFFFFFFFFFFFFFFFFFFFFFFFFFFFFFFFFFFFFFFFFFFFFFFFFFFF  
@A00155:342:HHGFNDSXY:1:2423:31250:34006 1:N:0:GAACCTAG+TCCGCATA  
GAGCGACTTCTCTCGGGCCCACAGCCTTACAGCTGTGGAGCACGGTATCCTCTGCCGAAACAGAGGTT  
GGACAAGACCGGAGGGGTCTCCTAGTTCAAAGGAGATGTACTCCGGGCTTGTTACGACCTACCGTG
```

[illegible]

FFFFFFFFFFFFFFFFFFFFFFFFFFFFFFFFFFFFFFFFFFFFFFFFFFFFFFFFFFFFFFFFFFFFFFFF:FF  
FFFFFFFFFFFFFFFFFFFFFFFFFFFFFFFFFFFFFFFFFFFFFFFFFFFFFFFFFFFFFFFFFFFFFFFF  
@A00155:342:HHGFNDSXY:1:2426:19623:30248 1:N:0:GAACCTAG+TCCGCATA  
ACTTCTCTCGGGCCACAGCCTTACAGCTGTGGAGCACGGTATCCTCTGCCGAAACAGAGGTTGGACA  
AGACCGGAGGGGTCTCCTAGTTCCAAAGGAGATGTACTCCGGGCTTGTTACGACCTACCGTGTAAGT  
+  
FFFFFFFFFFFFFFFFFFFFFFFFFFFFFFFFFFFFFFFFFFFFFFFFFFFFFFFFFFFFFFFFFFFFFFFF  
FFFFFFFF,FFFFFFFFFFFFFFFFFFFFFFFFFFFFFFFFFFFFFFFFFFFFFFFFFFFFFFFFFFFFFFFF  
@A00155:342:HHGFNDSXY:1:2427:9308:1548 1:N:0:GAACCTAG+TCCGCATA  
GGATGTAGAGGGCGAGAGAGAGCGACTTCTCTCGGGCCACAGCCTTACAGCTGTGGAGCACGGTATC  
CTCTGCCGAAACAGAGGTTGGACAAGACCGGAGGGGTCTCCTAGTTCCAAAGGAGATGTACTCC  
+  
FFFFF:FFFFFFFFFFFFFFFFFFFFFFFFFFFFFFFFFFFFFFFFFFFFFFFFFFFFFFFFFFFFFFFF  
FFFFFFFFFFFFFFFFFFFFFFFFFFFFFFFF,FFFFFFFFFFFFFFFFFFFFFFFFFFFFFFFFFFFFFFFF  
@A00155:342:HHGFNDSXY:1:2427:27190:2926 1:N:0:GAACCTAG+TCCGCATA  
AGGGCGAGAGAGAGCGACTTCTCTCGGGCCACAGCCTTACAGCTGTGGAGCACGGTATCCTCTGCCG  
AAACAGAGGTTGGACAAGACCGGAGGGGTCTCCTAGTTCCAAAGGAGATGTACTCCGGGCT  
+  
FFFFFFFFFFFFFFFFFFFFFFFFFFFFFFFFFFFFFFFFFFFFFFFFFFFFFFFFFFFFFFFFFFFFFFFF  
FFFF:FFF:FFFFFFFFFFFFFFFFFFFFFFFFFFFFFFFFFFFFFFFFFFFFFFFFFFFFFFFFFFFF  
@A00155:342:HHGFNDSXY:1:2427:5168:9565 1:N:0:GAACCTAG+TCCGCATA  
CAATGCCGAGAGGGATGTGGAGGGCGAGAGAGAGCGACTTCTCTCGGGCCACAGCCTTACAGCTGTG  
GAGCACGGTATCCTCTGCCGAAACAGAGGTTGGACAAGACCGGAGGGGTCTCCTAGTTCCAAAGGAGA  
+  
FFFFFFFFFFFF:FFFFFFFFFFFFFFFFFFFFFFFFFFFFFFFFFFFFFFFFFFFFFFFFFFFFFFFFFFFF  
FFFFFFFFFFFFFFFFFFFFFFFFFFFFFFFFFFFFFFFFFFFFFFFFFFFFFFFFFFFFFFFFFFFFFFFF  
@A00155:342:HHGFNDSXY:1:2427:29930:10144 1:N:0:GAACCTAG+TCCGCATA  
TATCCTCTGCCGAAACAGAGGTTGGACAAGACCGGAGGGGTCTCCTGGTTCCAAAGGAGATGTACTCC  
GGGCTTGTTACGACCTACCGTGTAAGTCGTAGTCTAGTAGGCTACCTGACGAGTCCTTTTAGGACG  
+  
FFFFFFFFFFFFFFFFFFFFFFFFFFFFFFFFFFFFFFFFFFFFFFFFFFFFFFFFFFFFFFFFFFFFFFFF  
FFFF:FFFFFFFFFFFFFFFFFFFFFFFFFFFFFFFFFFFFFFFFFFFFFFFFFFFFFFFFFFFFFFFF  
@A00155:342:HHGFNDSXY:1:2427:5077:11725 1:N:0:GAACCTAG+TCCGCATA  
CAATGCCGAGAGGGATGTGGAGGGCGAGAGAGAGCGACTTCTCTCGGGCCACAGCCTTACAGCTGTG  
GAGCACGGTATCCTCTGCCGAAACAGAGGTTGGACAAGACCGGAGGGGTCTCCTAGTTCCAAAGGAGA  
+  
FFFFFFF,FFFFFFFFFFFFFFFFFFFFFFFFFFFFFFFFFFFFFFFFFFFFFFFFFFFFFFFFFFFFFFFF  
FFFFFFFFFFFFFFFFFFFFFFFFFFFFFFFFFFFFFFFFFFFFFFFFFFFFFFFFFFFFFFFFFFFFFFFF  
@A00155:342:HHGFNDSXY:1:2427:20085:17425 1:N:0:GAACCTAG+TCCGCATA  
CGGTAGGTCGTGAACAAGCCCGAGTACATCTCCTTTGGAAGTAGGAGACCCCTCCGGTCTTGTTCAA  
CCTCTGTTTCGGCAGAGGATACCGTGCTCCACAGCTGTAAGGCTGTGGGCCCAGAGAAGTCGCTCTC  
+  
FFFFFFFFFFFFFFFFFFFFFFFFFFFFFFFFFFFFFFFFFFFFFFFFFFFFFFFFFFFFFFFFFFFFFFFF  
FFFFFFFFFFFFFFFFFFFFFFFFFFFFFFFFFFFFFFFFFFFFFFFFFFFFFFFFFFFFFFFFFFFFFFFF  
@A00155:342:HHGFNDSXY:1:2427:6813:23625 1:N:0:GAACCTAG+TCCGCATA  
CTCAATGCCGAGAGGGATGTGGAGGGCGAGAGAGAGCGACTTCTCTCGGGCCACAGCCTTACAGCTG  
TGGAGCACGGTATCCTCTGCCGAAACAGAGGTTGGACAAGACCGGAGGGGTCTCCTAGTTCCAAAGGA  
+  
FFFFFFFFFFFF:FFF:FFFF:F:FFF:FFFFFFFFFFFFFFFFFFFFFFFFFFFFFFFFFFFFFFFF, :FFFF  
FFFFFFFFFFFFFFFFFFFFFFFF:FFFF:FFFF,FFFFFFFFF,FFFFFF:FFFFFFFFF,FFFF,FFFF:FF:F  
@A00155:342:HHGFNDSXY:1:2427:26494:23672 1:N:0:GAACCTAG+TCCGCATA  
TATGGTCATCTCAATGCCGAGAGGGATGTGGAGGGCGAGAGAGAGCGACTTCTCTCGGGCCACAGCC  
TTACAGCTGTGGAGCACGGTATCCTCTGCCGAAACAGAGGTTGGACAAGACCGGAGGGGTCTCCTAG  
+

FFF:FFFFFF:FFFFFFFFFFFFFFFFFFFF, :FF, FFFFFFFFFFFFFFFFFFFFFFFFFF:FFFF:FFF  
:FFFFFF:FFFFFF:FFFFFF:FFFFFFFFFFFFFFFF, FF:FFFFFF:F:FFFFFFFFFFFF  
@A00155:342:HHGFNDSXY:1:2427:3387:35383 1:N:0:GAACCTAG+TCCGCATA  
ATCTCAATGCCGAGAGGGATGTGGAGGGCGAGAGAGAGCGACTTCTCTCGGGCCCACAGCCTTACAGC  
TGTGGAGCACGGTATCCTCTGCCGAAACAGAGGTTGGACAAGACCGGAGGGGTCTCCTA  
+  
FFFFFFFFFFFFFFFFFFFFFFFFFFFFFFFFFFFFFFFFFFFFFFFFFFFFFFFFFFFFFFFFFFFF  
FFFFFFFFFFFFFFFF:FFFFFF:FFFFFFFFFFFFFFFFFFFF:FF:FFFFFFFFFFFF  
@A00155:342:HHGFNDSXY:1:2428:11487:15092 1:N:0:GAACCTAG+TCCGCATA  
GGATGTAGAGGGCGAGAGAGAGCGACTTCTCTCGGGCCCACAGCCTTACAGCTGTGGAGCACGGTATC  
CTCTGCCGAAACAGAGGTTGGACAAGACCGGAGGGGTCTCCTAGTTCCAAAGGAGATGTACTCC  
+  
FFFFFFFFFFFFFFFFFFFFFFFFFFFFFFFFFFFFFFFFFFFFFFFFFFFFFFFFFFFFFFFFFFFF:FF  
FFFFFFFFFFFFFFFFFFFFFFFFFFFFFFFFFFFFFFFFFFFFFFFFFFFFFFFFFFFFFFFFFFFF  
@A00155:342:HHGFNDSXY:1:2428:20464:20713 1:N:0:GAACCTAG+TCCGCATA  
GCGACTTCTCTCGGGCCCACAGCCTTACAGCTGTGGAGCACGGTATCCTCTGCCGAAACAGAGGTTGG  
ACAAGACCGGAGGGGTCTCCTAGTTCCAAAGGAGATGTACTCCGGGCTTGTTACAGACCTACCGTGTA  
+  
FFFFFFFFFFFFFFFFFFFFFFFFFFFFFFFFFFFFFFFFFFFFFFFFFFFFFFFFFFFFFFFFFFFF  
FFFF:FFFFFFFFFFFFFFFF:FFFFFFFFFFFFFFFFFFFF:FFFFFFFFFFFFFFFFFFFF  
@A00155:342:HHGFNDSXY:1:2429:14281:7748 1:N:0:GAACCTAG+TCCGCATA  
TCTCTCGGGCCCACAGCCTTACAGCTGTGGAGCACGGTATCCTCTGCCGAAAAAGAGGTTGGACAAGA  
CCGGAGGGGTCTCCTAGTTCCAAAGGAGATGTACTCCGGGCTTGTTACAGACCTACCGTGTAAGTC  
+  
FFFFF::FFFF:FFF:F, :FFF:F:FF:FFF, FFFF::F:FFF:, FF, FFFFFFF:FFF, FF:FF:F  
F, FFFF:FF:FFFFFF::FFFFFF, :F:FFF:FFFF:, F:, FF::FFF:FFF:FFFF, FFFFFFF  
@A00155:342:HHGFNDSXY:1:2429:22851:10441 1:N:0:GAACCTAG+TCCGCATA  
GGATGTGGAGGGCGAGAGAGAGCGACTTCTCTCGGGCCCACAGCCTTACAGCTGTGGAGCACGGTATC  
CTCTGCCGAAACAGAGGTTGGACAAGACCGGAGGGGTCTCCTAGTTCCAAAGGAGATGTACTCC  
+  
FFF:FFFFFFFFFFFFFFFFFFFFFFFFFFFFFFFFFFFF, FFFFFFFFFFFFFFFFFFFFFF  
FFFFFFFFFFFFFFFFFFFFFFFFFFFFFFFFFFFFFFFFFFFFFFFFFFFFFFFFFFFFFFFFFFFF  
@A00155:342:HHGFNDSXY:1:2429:24957:13432 1:N:0:GAACCTAG+TCCGCATA  
GGATGTGGAGGGCGAGAGAGAGCGACTTCTCTCGGGCCCACAGCCTTACAGCTGTGGAGCACGGTATC  
CTCTGCCGAAACAGAGGTTGGACAAGACCGGAGGGGTCTCCTAGTTCCAAAGGAGATGTACTCC  
+  
FFFFFFFFFFFFFFFFFFFFFFFFFFFFFFFFFFFF:FFF:FFFFFFFF:FFFFFFFFFFFF:FF:FF  
FFFFFF:FF:FFFFFF:FFFFFFFF:FFFFFFFFFFFFFFFFFFFF:FFFF:FFFF:FFFF  
@A00155:342:HHGFNDSXY:1:2429:19849:23156 1:N:0:GAACCTAG+TCCGCATA  
GGATGTGGAGGGCGAGAGAGAGCGACTTCTCTCGGGCCCACAGCCTTACAGCTGTGGAGCACGGTATC  
CTCTGCCGAAACAGAGGTTGGACAAGACCGGAGGGGTCTCCTAGTTCCAAAGGAGATGTACTCC  
+  
FFFFFFFFFFFFFFFFFFFFFFFFFFFFFFFFFFFF:FFFFFFFFFFFFFFFFFFFFFFFFFFFFF  
FFFFFFFFFFFFFFFFFFFFFFFFFFFFFFFFFFFFFFFFFFFFFFFFFFFFFFFFFFFFFFFFFFFF  
@A00155:342:HHGFNDSXY:1:2430:24017:12900 1:N:0:GAACCTAG+TCCGCATA  
GTCATCTCAATGCCGAGAGGGATGTGGAGGGCGAGAGAGAGCGACTTCTCTCGGGCCCACAGCCTTAC  
AGCTGTGGAGCACGGTATCCTCTGCCGAAACAGAGGTTGGACAAGACCGGAGGGGTCTCCTAGTTCCA  
+  
FFFFFFFFFFFFFFFFFFFFFFFFFFFFFFFFFFFFFFFFFFFFFFFFFFFFFFFFFFFFFFFFFFFF  
FFFFFFFFFFFFFFFFFFFFFFFFFFFFFFFFFFFFFFFFFFFFFFFFFFFFFFFFFFFFFFFFFFFF  
@A00155:342:HHGFNDSXY:1:2430:19009:13088 1:N:0:GAACCTAG+TCCGCATA  
GTGTGGTGGGGCATGGGTTTGAACCCCATGACGGTCGGAGTCTAGTAGGCTCCCTGATGAGTCCGTT  
CCAAGGACGAAACCGTCGTTACTCTTCGAGTTGTGTAAGTTTCGTCCTAAAAAGGACTCGTCAGGTAG  
+



FFFFFFFFFFFFFFFFFFFFFFFFFFFFFFFFFFFFFFFFFFFFFFFFFFFFFFFFFFFFFFFFFFFFFFFF  
FFFFFFFFFFFFFFFFFFFFFFFFFFFFFFFFFFFFFFFFFFFFFFFFFFFFFFFFFFFFFFFFFFFFFFFF  
@A00155:342:HHGFNDSXY:1:2430:4164:21292 1:N:0:GAACCTAG+TCCGCATA  
TTAAGGACTCACCTCTGGCCTATGGTCATCTCAATGCCGAGAGGGATGTGGAGGGCGAGAGAGAGCGA  
CTTCTCTCGGGCCCACAGCCTTACAGCTGTGGAGCACGGTATCCTCTGCCGAAACAGAGGTTGGACAA  
+  
FFFF:FFFFFFFFFFFFFFFFFFFFFFFFFFFFFFFFFFFFFFFFFFFFFFFFFFFFFFFFFFFFFFFF  
FFFFFFFFFFFFFFFFFFFFFFFFFFFFFFFFFFFFFFFFFFFFFFFFFFFFFFFFFFFFFFFFFFFFFFFF  
@A00155:342:HHGFNDSXY:1:2430:2591:30937 1:N:0:GAACCTAG+TCCGCATA  
TGTTTCGGCAGAGGATACCGTGCTCCACAGCTGTAAGGCTGTGGGCCCCGAGAGAAGTCGCTCTCTC  
GCCCTTACATCCCTCTCGGCATTGAGATGACCATAGGCCAGAGGTGAGTCCTTAAGTGGACACAGCT  
+  
FFFFFFFFFFFFFFFFFFFFFFFFFFFFFFFFFFFFFFFFFFFFFFFFFFFFFFFFFFFFFFFFFFFFFFFF  
FFFFFFFFFFFFFFFFFFFFFFFFFFFFFFFFFFFFFFFFFFFFFFFFFFFFFFFFFFFFFFFFFFFFFFFF  
@A00155:342:HHGFNDSXY:1:2431:30156:10160 1:N:0:GAACCTAG+TCCGCATA  
AATGCCGAGAGGGATGTGGAGGGCGAGAGAGAGCGACTTCTCTCGGGCCCACAGCCTTACAGCTGTGG  
AGCACGGTATCCTCTGCCGAAACAGAGGTTGGACAAGACCGAGGGGTCTCCTAGTTCAAAGGAGAT  
+  
FFFFFFFFFFFFFFFFFFFF:F:FFFFF:FFFFFFFFFFFFFFFFFFFFFFFFFFFFFFFFFFFFFFFF  
FFFFFFFFFFFFFFFFFFFFFFFFFFFFFFFFFFFFFFFFFFFFFFFFFFFFFFFFFFFFFFFFFFFFFFFF  
@A00155:342:HHGFNDSXY:1:2431:30065:15984 1:N:0:GAACCTAG+TCCGCATA  
CTTCTCTCGGGCCCACAGCCTTACAGCTGTGGAGCACGGTATCCTCTGCCGAAACAGAGGTTGGACAA  
GACCGGAGGGGTCTCCTAGTTCAAAGGAGATGTACTCCGGGCTTGTTACGACCTACCGTGTAAGTC  
+  
FFFFFFFFFFFFFFFFFFFFFFFFFFFFFFFFFFFFFFFFFFFFFFFFFFFFFFFFFFFFFFFFFFFFFFFF  
FFFFFFFFFFFFFFFFFFFFFFFFFFFFFFFFFFFFFFFFFFFFFFFFFFFFFFFFFFFFFFFFFFFFFFFF  
@A00155:342:HHGFNDSXY:1:2431:6352:17816 1:N:0:GAACCTAG+TCCGCATA  
CTTCTCTCGGGCCCACAGCCTTACAAGTGTGGAGCACGGTATCCTCTGCCGAAACAGAGGTTGGACAA  
GACCGGAGGGGTCTCCTAGTTCAAAGGAGATGTACTCCGGGCTTGTTACGACCTACCGTGTAAGTC  
+  
FFFFFFFFFFFFFFFFFFFFFFFFFFFFFFFFFFFFFFFFFFFFFFFFFFFFFFFFFFFFFFFFFFFFFFFF  
FFFFF:FFFFFFFFFFFFFFFFFFFFFFFFFFFFFFFFFFFFFFFFFFFFFFFFFFFFFFFFFFFFFFFF  
@A00155:342:HHGFNDSXY:1:2431:26684:20087 1:N:0:GAACCTAG+TCCGCATA  
GAGAGGGATGTGGAGGGCGAGAGAGAGCGACTTCTCTCGGGCCCACAGCCTTACAGCTGTGGAGCACG  
GTATCCTCTGCCGAAACAGAGGTTGGACAAGACCGGAGGGGTCTCCTAGTTCAAAGGAGATGTACTC  
+  
FFF:FFFFFFFFFFFFFFFFFFFFFFFFFFFFFFFFFFFFFFFFFFFFFFFFFFFFFFFFFFFFFFFF  
FFFFFFFFFFFFFFFFFFFFFFFFFFFFFFFFFFFFFFFFFFFFFFFFFFFFFFFFFFFFFFFFFFFFFFFF  
@A00155:342:HHGFNDSXY:1:2431:13232:25535 1:N:0:GAACCTAG+TCCGCATA  
GCTGTGTCCACTTAAGGACTCACCTCTGGCCTATGGTCATCTCAATGCCGAGAGGGATGTGGAGGGCG  
AGAGAGAGCGACTTCTCTCGGGCCCACAGCCTTACAGCTGTGGAGCACGGTATCCTCTGCCGAAACAG  
+  
FFFFFFFFFFFFFFF:FFFFFFFFFFFFFFFFFFFFFFFFFFFFFFFFFFFFFFFFFFFFFFFFFFFFFF  
FFFFFFFFFFFFFFFFFFFFFFFFFFFFFFFFFFFFFFFFFFFFFFFFFFFFFFFFFFFFFFFFFFFFFF  
@A00155:342:HHGFNDSXY:1:2431:20292:30373 1:N:0:GAACCTAG+TCCGCATA  
GACCAGCTGTGTCCACTTAAGGACTCACCTCTGGCCTATGGTCATCTCAATGCCGAGAGGGATGTGGA  
GGGCGAGAGAGAGCGACTTCTCTCGGGCCCACAGCCTTACAGCTGTGGAGCACGGTATCCTCTGCCGA  
+  
FFFFFFFFFFFFFFFFFFFFFFFFFFFFFFFFFFFFFFFFFFFFFFFFFFFFFFFFFFFFFFFFFFFFFF  
:FFFFFFFFFFFFFFFFFFFFFFFFFFFFFFFFFFFFFFFFFFFFFFFFFFFFFFFFFFFFFFFFFFFFFF  
@A00155:342:HHGFNDSXY:1:2431:14344:30436 1:N:0:GAACCTAG+TCCGCATA  
AGATCAGCTGTGTCCACTTAAGGACTCACCTCTGGCCTATGGTCATCTCAATGCCGAGAGGGATGTAG  
AGGGCGAGAGAGAGCGACTTCTCTCGGGCCCACAGCCTTACAGCTGTGGAGCACGGTATCCTCTGCCG  
+

FFFFFFFFFFFFFFFFFF:FFFFFFFFFFFFFFFFFFFFFFFFFFFFFFFFFFFFFFFFFFFFFFFFFFFFFFFFFFFFFFFFFFFFFFFFFFFFFFFF  
 FFFFFFFFFFFFFFFFFF:FFFFFFFFFFFFFFFFFFFFFFFFFFFFFFFFFFFFFFFFFFFFFFFFFFFFFFFFFFFFFFFFFFFFFFFFFFFFFFFF  
 @A00155:342:HHGFNDSXY:1:2431:26124:35931 1:N:0:GAACCTAG+TCCGCATA  
 CTTCTCTCGGGCCACAGCCTTACAGCTGTGGAGCACGGTATCCTCTGCCGAAACAGAGGTTGGACAA  
 GACCGGAGGGGTCTCCTGGTTCCAAAGGAGATGTACTCCGGGCTTGTTACGACCTACCGTGTAAGTC  
 +  
 FFFFFFFFFFFFFFFFFF:FFFFFFFFFFFFFFFFFFFFFFFFFFFFFFFFFFFFFFFFFFFFFFFFFFFFFFFFFFFFFFFFFFFFFFFFFFFFFFFF  
 FFFFFFFFFFFFFFFFFF:FFFFFFFFFFFFFFFFFFFFFFFFFFFFFFFFFFFFFFFFFFFFFFFFFFFFFFFFFFFFFFFFFFFFFFFFFFFFFFFF  
 @A00155:342:HHGFNDSXY:1:2432:16369:4163 1:N:0:GAACCTAG+TCCGCATA  
 GATCAGCTGTGTCCACTTAAGGACTCACCTCTGGCCTATGGTCATCTCAATGCCGAGAGGGATGTGGA  
 GGGCGAGAGAGAGCGACTTCTCTCGGGCCACAGCCTTACAGCTGTGGAGCACGGTATCCTCTGCCGA  
 +  
 FFFFFFFFFFFFFFFFFF:FFFFFFFFFFFFFFFFFFFFFFFFFFFFFFFFFFFFFFFFFFFFFFFFFFFFFFFFFFFFFFFFFFFFFFFFFFFFFFFF  
 FFFFFFFFFFFFFFFFFF:FFFFFFFFFFFFFFFFFFFFFFFFFFFFFFFFFFFFFFFFFFFFFFFFFFFFFFFFFFFFFFFFFFFFFFFFFFFFFFFF  
 @A00155:342:HHGFNDSXY:1:2432:11749:20807 1:N:0:GAACCTAG+TCCGCATA  
 CGGTAGGTCGTGAACAAGCCGGAGTACATCTCCTTTGGAAGTGGAGAGCCCTCCGGTCTTGTTCAA  
 CCTCTGTTTCGGCAGAGGATACCGTGCTCCACAGCTGTAAGGCTGTGGGCCCGAGAGAAGTCGCTCTC  
 +  
 FFFFFFFFFFFFFFFFFF:FFFFFFFFFFFFFFFFFFFFFFFFFFFFFFFFFFFFFFFFFFFFFFFFFFFFFFFFFFFFFFFFFFFFFFFFFFFFFFFF  
 FFFFFFFFFFFFFFFFFF:FFFFFFFFFFFFFFFFFFFFFFFFFFFFFFFFFFFFFFFFFFFFFFFFFFFFFFFFFFFFFFFFFFFFFFFFFFFFFFFF  
 @A00155:342:HHGFNDSXY:1:2432:26802:29496 1:N:0:GAACCTAG+TCCGCATA  
 GATGTGGAGGGCGAGAGAGAGCGACTTCTCTCGGGCCACAGCCTTACAGCTGTGGAGCACGGTATCC  
 TCTGCCGAAACAGAGGTTGGACAAGACCGGAGGGGTCTCCTAGTTCCAAAGGAGATGTACTCCGGGCT  
 +  
 FFFFFFFFFFFFFFFFFF,FF:FF:FFFFFFFFFFFFFFFFFFFFFFFFFFFFFFFFFFFFFFFFFFFFFFFFFFFFFFFFFFFFFFFFFFFFFFFF  
 FFFFFFFFFFFFFFFFFF:FFFFFFFFFFFF:FFFFFFFFFFFF:FFFFFFFF:FFFFFFFFFFFF:FFFFFFFF:FF  
 @A00155:342:HHGFNDSXY:1:2432:3866:33677 1:N:0:GAACCTAG+TCCGCATA  
 GTCATCTCAATGCCGAGAGGGATGTGGAGGGCGAGAGAGAGCGACTTCTCTCGGGCCACAGCCTTAC  
 AGCTGTGGAGCACGGTATCCTCTGCCGAAACAGAGGTTGGACAAGACCGGAGGGGTCTCCTAGTTCCA  
 +  
 FFFFFFFFFFFFFFFFFF:FFF:FFFFFFFFFFFFFFFFFFFFFFFFFFFFFFFFFFFFFFFFFFFFFFFFFFFFFFFFFFFFFFFFFFFFFFFF  
 FFFFFFFFFFFFFFFFFF:FFFFFFFFFFFFFFFFFFFFFFFFFFFFFFFFFFFFFFFFFFFFFFFFFFFFFFFFFFFFFFFFFFFFFFFFFFFFFFFF  
 @A00155:342:HHGFNDSXY:1:2432:15266:33943 1:N:0:GAACCTAG+TCCGCATA  
 GAGCGACTTCTCTCGGGCCACAGCCTTACAGCTGTGGAGCACGGTATCCTCTGCCGAAACAGAGGTT  
 GGACAAGACCGGAGGGGTCTCCTGGTTCCAAAGGAGATGTACTCCGGGCTTGTTACGACCTACCGTG  
 +  
 FFFFFFFFFFFFFFFFFF:FFFFFFFFFFFFFFFFFFFFFFFFFFFFFFFFFFFFFFFFFFFFFFFFFFFFFFFFFFFFFFFFFFFFFFFFFFFFFFFF  
 FFFFFFFFFFFFFFFFFF:FFFFFFFFFFFFFFFFFFFFFFFFFFFFFFFFFFFFFFFFFFFFFFFFFFFFFFFFFFFFFFFFFFFFFFFFFFFFFFFF  
 @A00155:342:HHGFNDSXY:1:2433:13819:7764 1:N:0:GAACCTAG+TCCGCATA  
 GGATGTAGAGGGCGAGAGAGAGCGACTTCTCTCGGGCCACAGCCTTACAGCTGTGGAGCACGGTATC  
 CTCTGCCGAAACAGAGGTTGGACAAGACCGGAGGGGTCTCCTAGTTCCAAAGGAGATGTACTCC  
 +  
 FFFFFFFFFFFFFFFFFF:FFFFFFFFFFFFFFFFFFFFFFFFFFFFFFFFFFFFFFFFFFFFFFFFFFFFFFFFFFFFFFFFFFFFFFFFFFFFFFFF  
 FFFFFFFFFFFFFFFFFF:FFFFFFFFFFFFFFFFFFFFFFFFFFFFFFFFFFFFFFFFFFFFFFFFFFFFFFFFFFFFFFFFFFFFFFFFFFFFFFFF  
 @A00155:342:HHGFNDSXY:1:2433:17300:13823 1:N:0:GAACCTAG+TCCGCATA  
 GAGCGACTTCTCTCGGGCCACAGCCTTACAGCTGTGGAGCACGGTATCCTCTGCCGAAACAGAGGTT  
 GGACAAGACCGGAGGGGTCTCCTAGTTCCAAAGGAGATGTACTCCGGGCTTGTTACGACCTACCGTG  
 +  
 FFFFFFFFFFFFFFFFFF:FFFFFFFFFFFFFFFFFFFFFFFFFFFFFFFFFFFFFFFFFFFFFFFFFFFFFFFFFFFFFFFFFFFFFFFFFFFFFFFF  
 FFFFFFFFFFFFFFFFFF:FFFFFFFFFFFFFFFFFFFFFFFFFFFFFFFFFFFFFFFFFFFFFFFFFFFFFFFFFFFFFFFFFFFFFFFFFFFFFFFF  
 @A00155:342:HHGFNDSXY:1:2434:9914:4820 1:N:0:GAACCTAG+TCCGCATA  
 GGATGTGGAGGGCGAGAGAGAGCGACTTCTCTCGGGCCACAGCCTTACAGCTGTGGAGCACGGTATC  
 CTCTGCCGAAACAGAGGTTGGACAAGACCGGAGGGGTCTCCTAGTTCCAAAGGAGATGTACTCC  
 +

FFFFFFFFFFFFFFFFFFFFFFFFFFFFFFFFFFFFFFFFFFFFFFFFFFFFFFFFFFFFFFFFFFFFFFFF  
FFFFFFFFFFFFFFFFFFFFFFFFFFFFFFFFFFFFFFFFFFFFFFFFFFFFFFFFFFFFFFFFFFFFFFFF  
@A00155:342:HHGFNDSXY:1:2434:8232:10614 1:N:0:GAACCTAG+TCCGCATA  
AGCGACTTCTCTCGGGCCACAGCCTTACAGCTGTGGAGCACGGTATCCTCTGCCGAAACAGAGGTTG  
GACAAGACCGGAGGGGTCTCCTAGTTCCAAAGGAGATGTACTCCGGGCTTGTTACGACCTACCGTGT  
+  
FFFFFFFFFFFFFFFFFFFFFFFFFFFFFFFFFFFFFFFFFFFFFFFFFFFFFFFFFFFFFFFFFFFFFFFF  
FFFFFFFFFFFFFFFFFFFFFFFFFFFFFFFFFFFFFFFFFFFFFFFFFFFFFFFFFFFFFFFFFFFFFFFF  
@A00155:342:HHGFNDSXY:1:2434:16251:17143 1:N:0:GAACCTAG+TCCGCATA  
TTCTCTCGGGCCACAGCCTTACAGCTGTGGAGCACGGTATCCTCTGCCGAAACAGAGGTTGGACAAG  
ACCGGAGGGGTCTCCTAGTTCCAAAGGAGATGTACTCCGGGCTTGTTACGACCTACCGTGTAAGTCG  
+  
FFFFFFFFFFFFFFFFFFFFFFFFFFFFFFFFFFFFFFFFFFFFFFFFFFFFFFFFFFFFFFFFFFFFFFFF  
FFFFFFFFFFFFFFFFFFFFFFFFFFFFFFFFFFFFFFFFFFFFFFFFFFFFFFFFFFFFFFFFFFFFFFFF  
@A00155:342:HHGFNDSXY:1:2434:18638:25128 1:N:0:GAACCTAG+TCCGCATA  
AGAGAGAGCGACTTCTCTCGGGCCACAGCCTTACAGCTGTGGAGCACGGTATCCTCTGCCGAAACAG  
AGGTTGGACAAGACCGGAGGGGTCTCCTAGTTCCAAAGGAGATGTACTCCGGGCTTGTTACGACCTA  
+  
FFFFFFFFFFFFFFFFFFFFFFFFFFFFFFFFFFFFFFFFFFFFFFFFFFFFFFFFFFFFFFFFFFFFFFFF  
FFFFFFFFFFFFFFFFFFFFFFFFFFFFFFFFFFFFFFFFFFFFFFFFFFFFFFFFFFFFFFFFFFFFFFFF  
@A00155:342:HHGFNDSXY:1:2434:30355:25128 1:N:0:GAACCTAG+TCCGCATA  
GAGCGACTTCTCTCGGGCCACAGCCTTACAGCTGTGGAGCACGGTATCCTCTGCCGAAACAGAGGTT  
GGACAAGACCGGAGGGGTCTCCTAGTTCCAAAGGAGATGTACTCCGGGCTTGTTACGACCTACCGTG  
+  
FFFFFFFFFFFFFFFFFFFFFFFFFFFFFFFFFFFFFFFFFFFFFFFFFFFFFFFFFFFFFFFFFFFFFFFF  
FFFFFFFFFFFFFFFFFFFFFFFFFFFFFFFFFFFFFFFFFFFFFFFFFFFFFFFFFFFFFFFFFFFFFFFF  
@A00155:342:HHGFNDSXY:1:2434:20139:27696 1:N:0:GAACCTAG+TCCGCATA  
AGAGAGAGCGACTTCTCTCGGGCCACAGCCTTACAGCTGTGGAGCACGGTATCCTCTGCCGAAACAG  
AGGTTGGACAAGACCGGAGGGGTCTCCTAGTTCCAAAGGAGATGTACTCCGGACTTGTTACGACCTA  
+  
FFFFFFFFFFFFFFFFFFFFFFFFFFFFFFFFFFFFFFFFFFFFFFFFFFFFFFFFFFFFFFFFFFFFFFFF  
FFFFFFFFFFFFFFFFFFFFFFFFFFFFFFFFFFFFFFFFFFFFFFFFFFFFFFFFFFFFFFFFFFFFFFFF  
@A00155:342:HHGFNDSXY:1:2434:10465:31923 1:N:0:GAACCTAG+TCCGCATA  
TCTCTCTCGCCCTCCACATCCCTCTCGGCATTGAGATGACCATAGGCCAGAGGTGAGTCCTTAAGTGG  
ACACAGCTGATCTAAGGCGGTGTGGTGGGGCATGGGTTTGAACCCCATGACGGTCGGAGTCTAGTAG  
+  
FFFFFFFFFFFFFFFFFFFFFFFFFFFFFFFFFFFFFFFFFFFFFFFFFFFFFFFFFFFFFFFFFFFFFFFF  
FF:FFFF:FFFFFFFFFFFF,FFFFFFFFFFFFFFFFFFFFFFFFFFFFFFFFFFFFFFFFFFFFFFFF  
@A00155:342:HHGFNDSXY:1:2434:1597:34037 1:N:0:GAACCTAG+TCCGCATA  
ACTTCTCTCGGGCCACAGCCTTACAGCTGTGGAGCACGGTATCCTCTGCCGAAACAGAGGTTGGACA  
AGACCGGAGGGGTCTCCTAGTTCCAAAGGAGATGTACTCCGGGCTTGTTACGACCTACCGTGTAAGT  
+  
FF:FFFFFFFFFFFFFFFFFFFFFFFFFFFFFFFFFFFFFFFFFFFFFFFFFFFFFFFFFFFFFFFFFFFF  
FFFFFFFFFFFFFFFFFFFFFFFFFFFFFFFFFFFFFFFFFFFFFFFFFFFFFFFFFFFFFFFFFFFFFFFF  
@A00155:342:HHGFNDSXY:1:2434:22083:36949 1:N:0:GAACCTAG+TCCGCATA  
GAGCGACTTCTCTCGGGCCACAGCCTTACAGCTGTGGAGCACGGTATCCTCTGCCGAAACAGAGGTT  
GGACAAGACCGGAGGGGTCTCCTAGTTCCAAAGGAGATGTACTCCGGGCTTGTTACGACCTACCGTG  
+  
FFFFFFFFFFFFFFFFFFFFFFFFFFFFFFFFFFFFFFFFFFFFFFFFFFFFFFFFFFFFFFFFFFFFFFFF  
FFFFFFFFFFFFFFFFFFFFFFFFFFFFFFFFFFFFFFFFFFFFFFFFFFFFFFFFFFFFFFFFFFFFFFFF  
@A00155:342:HHGFNDSXY:1:2435:31521:4288 1:N:0:GAACCTAG+TCCGCATA  
AGGTCGTGAACAAGCCCGAGTACATCTCCTTTGGAAGTGGAGACCCCTCCGGTCTTGTTCAACCTC  
TGTTTCGGCAGAGGATACCGTGCTCCACAGCTGTAAGGCTGTGGGCCCGAGAGAAGTCGCTCTCTCTC  
+

FFF,FFFFFFFF:FFFFFFFFFFFFFFFFFFFFFFFFFFFFFFFF:F:FFFFFFFF:F::FFF:FF:FF:FFF:F  
FFFFFFFF:FFFFFFFFFFFFFFFFFFFFFFFFFFFFFFFF,FFFFFFFF,FFFFFFFFFFFFFFFF:F,FFFFFFFF  
@A00155:342:HHGFNDSXY:1:2435:11044:18584 1:N:0:GAACCTAG+TCCGCATA  
GCGACTTCTCTCGGGCCACAGCCTTACAGCTGTGGAGCACGGTATCCTCTGCCGAAACAGAGGTTGG  
ACAAGACCGGAGGGGTCTCCTAGTTCCAAAGGAGATGTACTCCGGGCTTGTTACGACCTACCGTGTA  
+  
F::F:FFFF:FFFFFFFF:FFFF,FFFFFFFF,:FF:,FFFF:FFFFFFFFFFFFFFFFFFFFFFFF, ,F  
FFFFFFFF:F,F,FF,FFF,F:FFFF,FFFF::FFFF:FFFFFFFFFFFFFFFFFFFFFFFF:FFFFFF:FFF:,F  
@A00155:342:HHGFNDSXY:1:2435:6705:19335 1:N:0:GAACCTAG+TCCGCATA  
CTTCTCTCGGGCCACAGCCTTACAGCTGTGGAGCACGGTATCCTCTGCCGAAACAGAGGTTGGACAA  
GACCGGAGGGGTCTCCTAGTTCCAAAGGAGATGTACTCCGGGCTTGTTACGACCTACCGTGTAAGTC  
+  
FFFFFFFFFFFFFFFFFFFFFFFFFFFFFFFFFFFFFFFFFFFFFFFFFFFFFFFFFFFFFFFFFFFFFFFFFFFF  
FFFFFFFFFFFFFFFFFFFFFFFFFFFFFFFFFFFFFFFFFFFFFFFFFFFFFFFFFFFFFFFFFFFFFFFFFFFF  
@A00155:342:HHGFNDSXY:1:2435:2727:23876 1:N:0:GAACCTAG+TCCGCATA  
AGCGACTTCTCTCGGGCCACAGCCTTACAGCTGTGGAGCACGGTATCCTCTGCCGAAACAGAGGTTG  
GACAAGACCGGAGGGGTCTCCTAGTTCCAAAGGAGATGTACTCCGGACTTGTTACGACCTACCGTGT  
+  
FFFFFFFFFFFFFFFFFFFFFFFFFFFFFFFFFFFFFFFFFFFFFFFFFFFFFFFFFFFFFFFFFFFFFFFFFFFF  
FFFFFFFFFFFFFFFFFFFFFFFFFFFFFFFFFFFFFFFFFFFFFFFFFFFFFFFFFFFFFFFFFFFFFFFFFFFF:FF:FFFFFFF  
@A00155:342:HHGFNDSXY:1:2435:5547:29136 1:N:0:GAACCTAG+TCCGCATA  
TCTCTCGGGCCACAGCCTTACAGCTGTGGAGCACGGTATCCTCTGCCGAAACAGAGGTTGGACAAGA  
CCGGAGGGGTCTCCTAGTTCCAAAGGAGATGTACTCCGGGCTTGTTACGACCTACCGTGTAAGTCGT  
+  
FFFFFFFFFFFFFFFFFFFFFFFFFFFFFFFFFFFFFFFFFFFFFFFFFFFFFFFFFFFFFFFFFFFFFFFFFFFF  
FFFFFFFFFFFFFFFFFFFFFFFFFFFFFFFFFFFFFFFFFFFFFFFFFFFFFFFFFFFFFFFFFFFFFFFFFFFF:FFFFFFF  
@A00155:342:HHGFNDSXY:1:2435:23854:31407 1:N:0:GAACCTAG+TCCGCATA  
GAGAGCGACTTCTCTCGGGCCACAGCCTTACAGCTGTGGAGCACGGTATCCTCTGCCGAAACAGAGG  
TTGGACAAGACCGGAGGGGTCTCCTAGTTCCAAAGGAGATGTACTCCGGGCTTGTTACGACCTACCG  
+  
FFFFFFFFFFFFFFFFFFFFFFFFFFFFFFFFFFFFFFFFFFFFFFFFFFFFFFFFFFFFFFFFFFFFFFFFFFFF  
FFFFFFFFFFFFFFFFFFFFFFFFFFFFFFFFFFFFFFFFFFFFFFFFFFFFFFFFFFFFFFFFFFFFFFFFFFFF  
@A00155:342:HHGFNDSXY:1:2435:14805:33677 1:N:0:GAACCTAG+TCCGCATA  
GAGAGAGCGACTTCTCTCGGGCCACAGCCTTACAGCTGTGGAGCACGGTATCCTCTGCCGAAACAGA  
GGTTGGACAAGACCGGAGGGGTCTCCTAGTTCCAAAGGAGATGTACTCCGGGCTTGTTACGACCTAC  
+  
FFFFFFFFFFFFFFFFFFFFFFFFFFFFFFFFFFFFFFFFFFFFFFFFFFFFFFFFFFFFFFFFFFFFFFFFFFFF  
FFFFFFFFFFFFFFFFFFFFFFFFFFFFFFFFFFFFFFFFFFFFFFFFFFFFFFFFFFFFFFFFFFFFFFFFFFFF  
@A00155:342:HHGFNDSXY:1:2436:23258:18630 1:N:0:GAACCTAG+TCCGCATA  
GTATCCTCTGCCGAAACAGAGGTTGGACAAGACCGGAGGGGTCTCCTAGTTCCAAAGGAGATGTACTC  
CGGGCTTGTTACGACCTACCGTGTAAGTCGTAGTCTAGTAGGCTACCTGACGAGTCCTTTTATAGGAC  
+  
FFFFFFFFFFFFFFFFFFFFFFFFFFFFFFFFFFFFFFFFFFFFFFFFFFFFFFFFFFFFFFFFFFFFFFFFFFFF  
FFFFFFFFFFFFFFFFFFFFFFFFFFFFFFFFFFFFFFFFFFFFFFFFFFFFFFFFFFFFFFFFFFFFFFFFFFFF  
@A00155:342:HHGFNDSXY:1:2436:9381:36558 1:N:0:GAACCTAG+TCCGCATA  
GGATGTGGAGGGCGAGAGAGCGACTTCTCTCGGGCCACAGCCTTACAGCTGTGGAGCACGGTATC  
CTCTGCCGAAACAGAGGTTGGACAAGACCGGAGGGGTCTCCTAGTTCCAAAGGAGATGTACTCCGGGC  
+  
FFFFFFFFFFFFFFFFFFFFFFFFFFFFFFFFFFFFFFFFFFFFFFFFFFFFFFFFFFFFFFFFFFFFFFFFFFFF  
FFFFFFFFFFFFFFFFFFFFFFFFFFFFFFFFFFFFFFFFFFFFFFFFFFFFFFFFFFFFFFFFFFFFFFFFFFFF  
@A00155:342:HHGFNDSXY:1:2437:29812:1642 1:N:0:GAACCTAG+TCCGCATA  
GTAAGTCGTAGTCTAGTAGGCTACCTGACGAGTCCTTTTATAGGACGAACTTACACAACCTCGAAGAGT  
TACGACGGTTTCGTCTTGGAACGGAAGTCTCAGGGAGCCTACTAGACTCCGACCGTCATGGG  
+

```

FFFFFFFFFFFFFFFFFFFFFFFFFFFFFFFFFFFFFFFF:FFFFFFFFFFFFFFFFFFFFFFFFFFFFFFFFFFFFF
FFFFFFFFFFFFFFF:FFFFFFFFFFFFFFFFFFFFFFFFFFFFFFFFFFFFFFFFFFFFFFFFFFFFFFFFFFFF:F
@A00155:342:HHGFNDSXY:1:2437:15962:23249 1:N:0:GAACCTAG+TCCGCATA
AGAGAGAGCGACTTCTCTCGGGCCCACAGCCTTACAGCTGTGGAGCACGGTATCCTCTGCCGAAACAG
AGGTTGGACAAGACCGGAGGGGTCTCCTAGTTCCAAAGGAGATGTACTCCGGGCTTGTTACACGACCTA
+
FFFFFFFFFFFFFFFFFFFFFFFFFFFFFFFFFFFFFFFF:FFFFFFFFFFFFFFFFFFFFFFFFFFFFFFFFFFFFF
FFFFFFFFFFFFFFFFFFFFFFFFFFFFFFFFFFFFFFFFFFFFFFFFFFFFFFFFFFFFFFFFFFFFFFFFFFFFF
@A00155:342:HHGFNDSXY:1:2437:13602:24580 1:N:0:GAACCTAG+TCCGCATA
TCCTCTGCCGAAACAGAGGTTGGACAAGACCGGAGGGGTCTCCTAGTTCCAAAGGAGATGTACTCCGG
GCTTGTTACACGACCTACCGTGTAAGTCGTAGTCTAATAGGCTACCTGACGAGTCCTTTTTTAGGACGAA
+
FFFFFFFFFFFFFFFFFFFFFFFFFFFFFFFFFFFFFFFF:FFFFFFFFFFFFFFFFFFFFFFFFFFFFFFFFFFF,FFFFFFFFFFFFFFFFFF
FFFFFFFFF:FFFFFFFFFFFFFFFFFFFFFFFFFFFFFFFFFFFFFFFF:FFFFFFFFFFFFFFFFFFFF:FFFFFFFFFFFFFFFF:FF
@A00155:342:HHGFNDSXY:1:2437:14859:28385 1:N:0:GAACCTAG+TCCGCATA
CTTCTCTCGGGCCCACAGCCTTACAGCTGTGGAGCACGGTATCCTCTGCCGAAACAGAGGTTGGACAA
GACCGGAGGGGTCTCCTGGTTCCAAAGGAGATGTACTCCGGGCTTGTTACACGACCTACCGTGTAAGTC
+
FFFFFFFFFFFFFFFFFFFFFFFFFFFFFFFFFFFFFFFFFFFFFFFFFFFFFFFFFFFFFFFFFFFFFFFFFFFFF
FFFFFFFFFFFFFFFFFFFFFFFFFFFFFFFFFFFFFFFFFFFFFFFFFFFFFFFFFFFFFFFFFFFFFFFFFFFFF
@A00155:342:HHGFNDSXY:1:2437:13178:30514 1:N:0:GAACCTAG+TCCGCATA
GAGGGCGAGAGAGAGCGACTTCTCTCGGGCCCACAGCCTTACAGCTGTGGAGCACGGTATCCTCTGCC
GAAACAGAGGTTGGACAAGACCGGAGGGGTCTCCTGGTTCCAAAGGAGATGTACTCCGGGCTTGTTCA
+
FFFFFFFFFFFFFFFFFFFFFFFFFFFFFFFFFFFFFFFFFFFFFFFFFFFFFFFFFFFFFFFFFFFFFFFFFFFFF
FFFFFFFFFFFFFFFFFFFFFFFFFFFFFFFFFFFFFFFFFFFFFFFFFFFFFFFFFFFFFFFFFFFFFFFFFFFFF:FFFFF
@A00155:342:HHGFNDSXY:1:2437:26865:34428 1:N:0:GAACCTAG+TCCGCATA
AATGCCGAGAGGGATGTGGAGGGCGAGAGAGAGCGACTTCTCTCGGGCCCACAGCCTTACAGCTGTGG
AGCACGGTATCCTCTGCCGAAACAGAGGTTGGACAAGACCGGAGGGGTCTCCTAGTTCCAAAGGAGAT
+
FFFFFFF:FFFFFFFFFFFFFFFFFFFFFFFFFFFFFFFFFFFFFFFFFFFFFFFFFFFFFFFFFFFFFFFFFFFFF:FFFFFFFFFFFFFFFFFF
FFFFFFFFFFFFFFFFFFFFFFFFFFFFFFFFFFFFFFFFFFFFFFFFFFFFFFFFFFFFFFFFFFFFFFFFFFFFF:FFFFFFFFFFFFFFFFFF
@A00155:342:HHGFNDSXY:1:2437:3558:35430 1:N:0:GAACCTAG+TCCGCATA
TGTTTCGGCAGAGGATACCGTGCTCCACAGCTGTAAGGCTGTGGGCCCGAGAGAAGTCGCTCTCTCTC
GCCCTCCACATCCCTCTCGGCATTGAGATGACCATAGGCCAGAGGTGAGTCCTTAAGTGGACACAGCT
+
FFFFFFFFFFFFFFFFFFFFFFFFFFFFFFFFFFFFFFFFFFFFFFFFFFFFFFFFFFFFFFFFFFFFFFFFFFFFF
FFFFFFFFFFFFFFFFFFFFFFFFFFFFFFFFFFFFFFFFFFFFFFFFFFFFFFFFFFFFFFFFFFFFFFFFFFFFF
@A00155:342:HHGFNDSXY:1:2439:10149:22451 1:N:0:GAACCTAG+TCCGCATA
CACGGTATCCTCTGCCGAAACAGAGGTTGGACAAGACCGGAGGGGTCTCCTAGTTCCAAAGGAGATGT
ACTCCGGGCTTGTTACACGACCTACCGTGTAAGTCGTAGTCTAGTAGGCTACCTGACGAGTCCTTTTA
+
FFFFFFFFFFFFFFFFFFFFFFFFFFFFFFFFFFFFFFFFFFFFFFFFFFFFFFFFFFFFFFFFFFFFFFFFFFFFF
FFFFFFFFFFFFFFFFFFFFFFFFFFFFFFFFFFFFFFFFFFFFFFFFFFFFFFFFFFFFFFFFFFFFFFFFFFFFF:FFFFFFFFFFFFFFFFFF:FFFFF
@A00155:342:HHGFNDSXY:1:2440:13910:12900 1:N:0:GAACCTAG+TCCGCATA
GAGAGGGATGTAGAGGGCGAGAGAGAGCGACTTCTCTCGGGCCCACAGCCTTACAGCTGTGGAGCACG
GTATCCTCTGCCGAAACAGAGGTTGGACAAGACCGGAGGGGTCTCCTAGTTCCAAAGGAGATGTACTC
+
FFFFFFFFFFFFFFFFFFFFFFFFFFFFFFFFFFFFFFFFFFFFFFFFFFFFFFFFFFFFFFFFFFFFFFFFFFFFF
FFFFFFFFFFFFFFFFFFFFFFFFFFFFFFFFFFFFFFFFFFFFFFFFFFFFFFFFFFFFFFFFFFFFFFFFFFFFF:FFFFFFFFFFFFFFFFFF
@A00155:342:HHGFNDSXY:1:2440:25337:31156 1:N:0:GAACCTAG+TCCGCATA
AGAGAGAGCGACTTCTCTCGGGCCCACAGCCTTACAGCTGTGGAGCACGGTATCCTCTGCCGAAACAG
AGGTTGGACAAGACCGGAGGGGTCTCCTAGTTCCAAAGGAGATGTACTCCGGGCTTGTTACACGACCTA
+

```

FFFFFFFFFFFFFFFFFFFFFFFFFFFFFFFFFFFFFFFFFFFFFFFFFFFFFFFFFFFFFFFFFFFFFFFF  
FFFFFFFFFFFFFFFFFFFFFFFFFFFFFFFFFFFFFFFFFFFFFFFFFFFFFFFFFFFFFFFFFFFFFFFF  
@A00155:342:HHGFNDSXY:1:2440:25201:31641 1:N:0:GAACCTAG+TCCGCATA  
AGAGAGAGCGACTTCTCTCGGGCCACAGCCTTACAGCTGTGGAGCACGGTATCCTCTGCCGAAACAG  
AGGTTGGACAAGACCGGAGGGGTCTCCTAGTTCCAAAGGAGATGTACTCCGGGCTTGTTACGACCTA  
+  
FFFFFFFFFFFFFFFFFFFFFFFFFFFFFFFFFFFFFFFFFFFFFFFFFFFFFFFFFFFFFFFFFFFFFFFF  
FFFFFFFFFFFFFFFFFFFFFFFFFFFFFFFFFFFFFFFFFFFFFFFFFFFFFFFFFFFFFFFFFFFFFFFF  
@A00155:342:HHGFNDSXY:1:2440:15320:32816 1:N:0:GAACCTAG+TCCGCATA  
CCACCACACCGCCTTAGATCAGCTGTGTCCACTTAAGGACTCACCTCTGGCCTATGGTCATCTCAATG  
CCGAGAGGGATGTGGAGGGCGAGAGAGAGCGACTTCTCTCGGGCCACAGCCTTACAGCTGTGGAGCA  
+  
FFFFF,FF:FFFF:F:FFFFFFFFFFFFF,F::FFF,:FFFFFFFFF,FFF:F:FFFFFFFFFFFFF  
FFFFFFFFFFFF,FFFFFFFFFFFFF:FFFFFFFFFFFF:FFFFFFFFFFFFFFFFFFF:FF,:FFFFF:  
@A00155:342:HHGFNDSXY:1:2440:26648:35149 1:N:0:GAACCTAG+TCCGCATA  
GCTGTGTCCACTTAAGGACTCACCTCTGGCCTATGGTCATCTCAATGCCGAGAGGGATGTAGAGGGCG  
AGAGAGAGCGACTTCTCTCGGGCCACAGCCTTACAGCTGTGGAGCACGGTATCCTCTGCCGAAACAG  
+  
FFFFFFFFFFFFFFFFFFFFFFFFFFFFFFFFFFFFFFFFFFFFFFFFFFFFFFFFFFFFFFFFFFFF:FF:FFFFF  
FFFFFFFFFFFFFFFFFFFFFFFFFFFFFFFFFFFFFFFFFFFFFFFFFFFFFFFFFFFFFFFFFFFFFFFF  
@A00155:342:HHGFNDSXY:1:2441:14507:15468 1:N:0:GAACCTAG+TCCGCATA  
CCTCTGGCCTATGGTCATCTCAATGCCGAGAGGGATGTGGAGGGCGAGAGAGAGCGACTTCTCTCGGG  
CCCACAGCCTTACAGCTGTGGAGCACGGTATCCTCTGCCGAAACAGAGGTTGGACAAGAC  
+  
FFFFFFFFFFFFFFFFF:FFFFFFFFFFFFFFFFFFFFF:FF,FF:FFFFFFFFFFFFFFFFFFFFFFFFF:FFF  
FFFFFFFFFFFFF:FFFFF:FFFF:FFFFFFFFFFFFFFFFFFFFF:FFF:FFFFFFFFFFFFF  
@A00155:342:HHGFNDSXY:1:2441:5502:15749 1:N:0:GAACCTAG+TCCGCATA  
ACCGCCTTAGATCAGCTGTGTCCACTTAAGGACTCACCTCTGGCCTATGGTCATCTCAATGCCGAGAG  
GGATGTGAAGGGCGAGAGAGAGCGACTTCTCTCGGGCCACAGCCTTACAGCTGTGGAGCACGGTATC  
+  
FFFFFFFFFFFFFFFFFFFFFFFFFFFFFFFFFFFFFFFFFFFFFFFFFFFFFFFFFFFFFFFFFFFFFFFF  
FFFFFFFFF:FFFFFFFFFFFFFFFFFFFFFFFFFFFFFFFFFFFFFFFFFFFFFFFFFFFFFFFFFFFF:FF  
@A00155:342:HHGFNDSXY:1:2442:2573:2879 1:N:0:GAACCTAG+TCCGCATA  
GTCATCTCAATGCCGAGAGGGATGTGGAGGGCGAGAGAGAGCGACTTCTCTCGGGCCACAGCCTTAC  
AGCTGTGGAGCACGGTATCCTCTGCCGAAACAGAGGTTGGACAAGACCGGAGGGGTCTCCTAGTTCCA  
+  
FFFFFFFFFFFFFFFFFFFFF:FFFFFFFFFFFFFFFFFFFFFFFFFFFFFFFFFFFFFFFFFFFFFFFFFFFF  
FFFFFFFFFFFFFFFFFFFF:FFFFFFFFFFFFFFFFFFFFFFFFFFFFFFFFFFFFFFFFFFFFFFFFFFFF:FFFF  
@A00155:342:HHGFNDSXY:1:2442:15094:14231 1:N:0:GAACCTAG+TCCGCATA  
GGATGTGGAGGGCGAGAGAGAGCGACTTCTCTCGGGCCACAGCCTTACAGCTGTGGAGCACGGTATC  
CTCTGCCGAAACAGAGGTTGGACAAGACCGGAGGGGTCTCCTAGTTCCAAAGGAGATGTACTCC  
+  
FFF,FFFFFFFFFFFFFFFFFFFFFFFFFFFFFFFFFFFFF:FFFFFFF,FFFFF:FFFFFFFFFFFFF,FF  
FFFFFFFFFFFFFFFFFFFF,FFFFFFFFFFFFF:FFFFFFFFFFFFFFFFFFFFFFFFFFFFFFFFFFFFF  
@A00155:342:HHGFNDSXY:1:2442:5909:17675 1:N:0:GAACCTAG+TCCGCATA  
TGTCCACTTAAGGACTCTCCTCTGGCCTATGGTCATCTCAATGCCGAGAGGGATGTGGAGGGCGAGAG  
AGAGCGACTTCTCTCGGGCCACAGCCTTACAGCTGTGGAGCACGGTATCCTCTGCCGAAACAGAGGT  
+  
FFFFFFFFFFFFFFFFFFFFFFFFFFFFFFFFFFFFFFFFFFFFFFFFFFFFFFFFFFFFFFFFFFFFFFFF  
FFFFFFFFFFFFFFFFFFFFFFFFFFFFFFFFFFFFF:FFFFFFFFFFFFFFFFFFFFFFFFFFFFFFFFFFFF  
@A00155:342:HHGFNDSXY:1:2442:5936:17816 1:N:0:GAACCTAG+TCCGCATA  
TGTCCACTTAAGGACTCTCCTCTGGCCTATGGTCATCTCAATGCCGAGAGGGATGTGGAGGGCGAGAG  
AGAGCGACTTCTCTCGGGCCACAGCCTTACAGCTGTGGAGCACGGTATCCTCTGCCGAAACAGAGGT  
+

FFFFF,FFF:FFFFFFFF:FFFF:FFFFFFFFFFFFFFFFFFFFFFFF:FF,F:FFFFFFFFFFFF  
FFFFFFFFFFFFFF,FF:FFFFFFFFFFFF:FFFF:FFF,FFFF:FF:F:FFFFFFFFFFFFFFFF:F:  
@A00155:342:HHGFNDSXY:1:2442:29640:21762 1:N:0:GAACCTAG+TCCGCATA  
GTCATCTCAATGCCGAGAGGGATGTGGAGGGCGAGAGAGAGCGACTTCTCTCGGGCCCACAGCCTTAC  
AGCTGTGGAGCACGGTATCCTCTGCCGAAACAGAGGTTGGACAAGACCGGAGGGGTCTCCTAGTTCCA  
+  
FFFFFFFFFFFFFFFFFFFFFFFF:FFFFFFFFFFFFFFFFFFFFFFFFFFFFFFFFFFFFFFFFFFFFF  
FFFFFFFFFFFFFFFFFFFFFFFFFFFFFFFFFFFFFFFFFFFFFFFF:FFFFFFFFFFFFFFFFFFFFF  
@A00155:342:HHGFNDSXY:1:2442:11514:31015 1:N:0:GAACCTAG+TCCGCATA  
GGATGTGGAGGGCGAGAGAGAGCGACTTCTCTCGGGCCCACAGCCTTACAGCTGTGGAGCACGGTATC  
CTCTGCCGAAACAGAGGTTGGACAAGACCGGAGGGGTCTCCTGGTTCCAAAGGAGATGTACTCC  
+  
FFFFFFFFFFFFFFFFFFFFFFFFFFFFFFFFFFFFFFFFFFFFFFFFFFFFFFFFFFFFFFFFFFFFF  
FFFFFFFFFFFFFFFFFFFFFFFFFFFFFFFFFFFFFFFFFFFFFFFFFFFFFFFFFFFFFFFFFFFFF  
@A00155:342:HHGFNDSXY:1:2442:32850:33489 1:N:0:GAACCTAG+TCCGCATA  
CTTCTCTCGGGCCCACAGCCTTACAGCTGTGGAGCACGGTATCCTCTGCCGAAACAGAGGTTGGACAA  
GACCGGAGGGGTCTCCTCGTTCCAAAGGAGATGTACTCCGGGCTTGTTACGACCTACCGTGTAAGTC  
+  
FFFFFFFFFFFFFFFFFFFFFFFFFFFFFFFFFFFFFFFFFFFFFFFFFFFFFFFFFFFFFFFFFFFFF  
FFFFFFFFFFFFFFFFFFFFFFFFFFFFFFFFFFFFFFFFFFFFFFFFFFFFFFFFFFFFFFFFFFFFF:FFFFFFFFFFFFFFFFFFFFF  
@A00155:342:HHGFNDSXY:1:2442:4779:34413 1:N:0:GAACCTAG+TCCGCATA  
ATCTCAATGCCGAGAGGGATGTGGAGGGCGAGAGAGAGCGACTTCTCTCGGGCCCACAGCCTTACAGC  
TGTGGAGCACGGTATCCTCTGCCGAAACAGAGGTTGGACAAGACCGGAGGGGTCTCCTAGTTCCTAAG  
+  
FFFFFFFFFFFFFFFFFFFFFFF:FFF:FFFFFFFFFFFFFFFFFFFFFFFFFFFFFFFFFFFFFFFFFFFFF:FFFFFFFFF  
FFFFFFFFFFFFFFFFFFFFFFFFFFFFFFFFFFFFFFFFFFFFF:FFFFFFFFFF:FFFFF,FFFFFFF:FFFFFFF:FF  
@A00155:342:HHGFNDSXY:1:2443:21847:8641 1:N:0:GAACCTAG+TCCGCATA  
AGAGAGAGCGACTTCTCTCGGGCCCACAACCTTACAGCTGTGGAGCACGGTATCCTCTGCCGAAACAG  
AGGTTGGACAAGACCGGAGGGGTCTCCTAGTTCCAAAGGAGATGTACTCCGGGCTTGTTACGACCTA  
+  
FFFFFFFFFFFFFFFFFFFFFFFFFFFFFFFFFFFFFFFFFFFFFFFFFFFFFFFFFFFFFFFFFFFFF  
FFFFFFFFFFFFFFFFFFFFFFFFFFFFFFFFFFFFFFFFFFFFFFFFFFFFFFFFFFFFFFFFFFFFF:FFFFFFFFFFFFFFFFFFFFF:FF  
@A00155:342:HHGFNDSXY:1:2443:11876:27226 1:N:0:GAACCTAG+TCCGCATA  
ATCTCAATGCCGAGAGGGATGTGGAGGGCGAGAGAGAGCGACTTCTCTCGGGCCCACAGCCTTACAGC  
TGTGGAGCACGGTATCCTCTGCCGAAACAGAGGTTGGACAAGACCGGAGGGGTCTCCTAGTTCCTAAG  
+  
FFFFFFFFFFFFFFFFFFFFFFF:FFFFFFFFFFFFFFFFFFFFFFFFFFFFFFFFFFFFFFFFFFFFFFFFFFFFF  
FFFFFFFFFFFFFFFFFFFFFFFFFFFFFFFFFFFFFFFFFFFFFFFFFFFFFFFFFFFFFFFFFFFFF:FFF  
@A00155:342:HHGFNDSXY:1:2444:28664:28244 1:N:0:GAACCTAG+TCCGCATA  
CTTCTCTCGGGCCCACAGCCTTACAGCTGTGGAGCACGGTATCCTCTGCCGAAACAGAGGTTGGACAA  
GACCGGAGGGGTCTCCTAGTTCCTAAGGAGATGTACTCCGGGCTTGTTACGACCTACCGTGTAAGTC  
+  
FFFFFFFFFFFFFFFFFFFFFFFFFFFFFFFFFFFFFFFFFFFFFFFFFFFFFFFFFFFFFFFFFFFFF  
FFFFFFFFFFFFFFFFFFFFFFFFFFFFFFFFFFFFFFFFFFFFFFFFFFFFFFFFFFFFFFFFFFFFF:FFF  
@A00155:342:HHGFNDSXY:1:2444:32117:30217 1:N:0:GAACCTAG+TCCGCATA  
TTCTCTCGGGCCCACAGCCTTACAGCTGTGGAGCACGGTATCCTCTGCCGAAACAGAGGTTGGACAAG  
ACCGGAGGGGTCTCCTAGTTCCTAAGGAGATGTACTCCGGGCTTGTTACGACCTACCGTGTAAGTCG  
+  
FFFFFFFFFFFFFFFFFFFFFFF,FFFFFFFFFFFFFFFFFFFFFFFFFFFFFFFFFFFFFFFFFFFFFFFFFFFFF  
FFFFFFFFFFFFFFFFFFFFFFFFFFFFFFFFFFFFFFFFFFFFFFFFFFFFFFFFFFFFFFFFFFFFF:F,FF  
@A00155:342:HHGFNDSXY:1:2444:29008:37043 1:N:0:GAACCTAG+TCCGCATA  
AAGGACTCTCCTCTGGCCTATGGTCATCTCAATGCCGAGAGGGATGTGGAGGGCGAGAGAGAGCGACT  
TCTCTCGGGCCCACAGCCTTACAGCTGTGGAGCACGGTATCCTCTGCCGAAACAGAGGTTGGACAAGA  
+

FFFFFFFFFFFFFFFFFFFFFFFFFFFFFFFFFFFFFFFFFFFFFFFFFFFFFFFFFFFFFFFFFFFFFFFF  
FFFFFFFFFFFFFFFFFFFFFFFFFFFFFFFFFFFFFFFFFFFFFFFFFFFFFFFFFFFFFFFFFFFFFFFF  
@A00155:342:HHGFNDSXY:1:2445:26567:3255 1:N:0:GAACCTAG+TCCGCATA  
CCTCCACATCCCTCTCGGCATTGAGATGACCATAGGCCAGAGGTGAGTCCTTAAGTGGACACAGCTGA  
TCTAAGGCGGTGTGGCGGGGCATGGGTTTGAACCCCATGACGGTCGGAGTCTAGTAGGCTCCCTGAT  
+  
FFFFFFFFFFFFFFFFFFFFFFFFFFFFFFFFFFFFFFFFFFFFFFFFFFFFFFFFFFFFFFFFFFFFFFFF  
FFFFFFFFFFFFFFFFFFFFFFFFFFFFFFFFFFFFFFFFFFFFFFFFFFFFFFFFFFFFFFFFFFFFFFFF  
@A00155:342:HHGFNDSXY:1:2445:14498:8218 1:N:0:GAACCTAG+TCCGCATA  
GTCATCTCAATGCCGAGAGGGATGTGGAGGGCGAGAGAGAGCGACTTCTCTCGGGCCCACAGCCTTAC  
AGCTGTGGAGCACGGTATCCTCTGCCGAAACAGAGGTTGGACAAGACCGGAGGGGTCTCCTAGTTCCA  
+  
FFFFFFFFFFFFFFFFFFFFFFFFFFFFFFFFFFFFFFFFFFFFFFFFFFFFFFFFFFFFFFFFFFFFFFFF  
FFFFFFFFFFFFFFFFFFFFFFFFFFFFFFFFFFFFFFFFFFFFFFFFFFFFFFFFFFFFFFFFFFFFFFFF  
@A00155:342:HHGFNDSXY:1:2445:31340:22044 1:N:0:GAACCTAG+TCCGCATA  
CTTAAGGACTCTCCTCTGGCCTATGGTCATCTCAATGCCGAGAGGGATGTGGAGGGCGAGAGAGAGCG  
ACTTCTCTCGGGCCCACAGCCTTACAGCTGTGGAGCACGGTATCCTCTGCCGAAACAGAGGTTGGACA  
+  
FFFFFFFFFFFFFFFFFFFFFFFFFFFFFFFFFFFFFFFFFFFFFFFFFFFFFFFFFFFFFFFFFFFFFFFF  
:FFFFFFFFFFFFFFFFFFFFFFFFFFFFFFFFFFFFFFFFFFFFFFFFFFFFFFFFFFFFFFFFFFFFFFFF:  
@A00155:342:HHGFNDSXY:1:2445:7030:31892 1:N:0:GAACCTAG+TCCGCATA  
GTCATCTCAATGCCGAGAGGGATGTGGAGGGCGAGAGAGAGCGACTTCTCTCGGGCCCACAGCCTTAC  
AGCTGTGGAGCACGGTATCCTCTGCCGAAACAGAGGTTGGACAAGACCGGAGGGGTCTCCTAGTTCCA  
+  
FFFFFFFFFFFFFFFFFFFFFFFFFFFFFFFFFFFFFFFFFFFFFFFFFFFFFFFFFFFFFFFFFFFFFFFF  
FFFFFFFFFFFFFFFFFFFFFFFFFFFFFFFFFFFFFFFFFFFFFFFFFFFFFFFFFFFFFFFFFFFFFFFF,FFFFF  
@A00155:342:HHGFNDSXY:1:2446:18710:20964 1:N:0:GAACCTAG+TCCGCATA  
AGCGACTTCTCTCGGGCCCACAGCCTTACAGCTGTGGAGCACGGTATCCTCTGCCGAAACAGAGGTTG  
GACAAGACCGGAGGGGTCTCCTAGTTCCAAAGGAGATGTACTCCGGGCTTGTTACGACCTACCGTGT  
+  
FFFFFFFFFFFFFFFFFFFFFFFFFFFFFFFFFFFFFFFFFFFFFFFFFFFFFFFFFFFFFFFFFFFFFFFF  
FFFFFFFFFFFFFFFFFFFFFFFFFFFFFFFFFFFFFFFFFFFFFFFFFFFFFFFFFFFFFFFFFFFFFFFF:FFFFFFFFFFFFFFFFFFFFFFFF  
@A00155:342:HHGFNDSXY:1:2447:9968:8422 1:N:0:GAACCTAG+TCCGCATA  
GGGCGAGAGAGAGCGACTTCTCTCGGGCCCACAGCCTTACAGCTGTGGAGCACGGTATCCTCTGCCGA  
AACAGAGGTTGGACAAGACCGGAGGGGTCTCCTAGTTCCAAAGGAGATGTACTCCGGGCTTGTTACG  
+  
FFFFFFFFFFFFFFFFFFFFFFFFFFFFFFFFFFFFFFFFFFFFFFFFFFFFFFFFFFFFFFFFFFFFFFFF  
FFFFFFFFFFFFFFFFFFFFFFFFFFFFFFFFFFFFFFFFFFFFFFFFFFFFFFFFFFFFFFFFFFFFFFFF  
@A00155:342:HHGFNDSXY:1:2447:8187:24909 1:N:0:GAACCTAG+TCCGCATA  
TGTCCACTTAAGGACTCACCTCTGGCCTATGGTCATCTCAATGCCGAGAGGGATGTGGAGGGCGAGAG  
AGAGCGACTTCTCTCGGGCCCACAGCCTTACAGCTGTGGAGCACGGTATCCTCTGCCGAAACAGAGGT  
+  
FFFFFFFFFFFFFFFFFFFFFFFFFFFFFFFFFFFFFFFFFFFFFFFFFFFFFFFFFFFFFFFFFFFFFFFF  
FFFFFFFFFFFFFFFFFFFFFFFFFFFFFFFFFFFFFFFFFFFFFFFFFFFFFFFFFFFFFFFFFFFFFFFF  
@A00155:342:HHGFNDSXY:1:2448:8910:1986 1:N:0:GAACCTAG+TCCGCATA  
ACTTCTCTCGGGCCCACAGCCTTACAGCTGTGGAGCACGGTATCCTCTGCCGAAACAGAGGTTGGACA  
AGACCGGAGGGGTCTCCTAGTTCCAAAGGAGATGTACTCCGGGCTTGTTACGACCTACCGTGTAAGT  
+  
FFFFFFFFFFFFFFFFFFFFFFFFFFFFFFFFFFFFFFFFFFFFFFFFFFFFFFFFFFFFFFFFFFFFFFFF  
FFFFFFFFFFFFFFFFFFFFFFFFFFFFFFFFFFFFFFFFFFFFFFFFFFFFFFFFFFFFFFFFFFFFFFFF  
@A00155:342:HHGFNDSXY:1:2448:12662:23109 1:N:0:GAACCTAG+TCCGCATA  
CACCTCTGGCCTATGGTCATCTCAATGCCGAGAGGGATGTGGAGGGCGAGAGAGAGCGACTTCTCTCG  
GGCCCACAGCCTTACAGCTGTGGAGCACGGTATCCTCTGCCGAAACAGAGGTTGGACAAGACCGGAGG  
+



FFFFFFFFFFFFFFFFFFFFFFFFFFFFFFFFFFFFFFFFFFFFFFFFFFFFFFFFFFFFFFFFFFFFFFFFFFFF  
FFFFFFFFFFFFFFFFFFFFFFFFFFFFFFFFFFFFFFFFFFFFFFFFFFFFFFFFFFFFFFFFFFFFFFFFFFFF:FFFFFFFF  
@A00155:342:HHGFNDSXY:1:2448:24885:24956 1:N:0:GAACCTAG+TCCGCATA  
AGATCAGCTGTGTCCACTTAAGGACTCACCTCTGGCCTATGGTCATCTCAATGCCGAGAGGGATGTGA  
AGGGCGAGAGAGAGCGACTTCTCTCGGGCCACAGCCTTACAGCTGTGGAGCACGGTATCCTCTGCCG  
+  
FFFFFFFFFFFFFFFFFFFFFFFFFFFFFFFFFFFFFFFFFFFFFFFFFFFFFFFFFFFFFFFFFFFFFFFFFFFF  
FFFFFFFFFFFFFFFFFFFFFFFFFFFFFFFFFFFFFFFFFFFFFFFFFFFFFFFFFFFFFFFFFFFFFFFFFFFF:FFFFFF:FFFFFFFFFFFFFFFFFFFFFFFFFFFF  
@A00155:342:HHGFNDSXY:1:2448:31458:25066 1:N:0:GAACCTAG+TCCGCATA  
CTCTGGCCTATGGTCATCTCAATGCCGAGAGGGATGTGGAGGGCGAGAGAGAGCGACTTCTCTCGGGC  
CCACAGCCTTACAGCTGTGGAGCACGGTATCCTCTGCCGAAACAGAGGTTGGACAAGACCGGAGGGGT  
+  
FFFFFFFFFFFFFFFFFFFFFFFFFFFF:F:FFFFFF:FFF:FF:FFFFFFFFFFFFFFFFFFFFFFFFFFFFFFFF  
FFFFFFFF:FFFFFFFFFFFF:FFFFFFFFFFFFFFFFFFFFFFFFFFFFFFFFFFFF,FFFFFFFFFFFFFFFFFFFF  
@A00155:342:HHGFNDSXY:1:2449:13910:21543 1:N:0:GAACCTAG+TCCGCATA  
GAGCGACTTCTCTCGGGCCACAGCCTTACAGCTGTGGAGCACGGTATCCTCTGCCGAAACAGAGGTT  
GGACAAGACCGGAGGGGTCTCCTAGTTCCAAAGGAGATGTACTCCGGGCTTGTTACGACCTACCGTG  
+  
FFFFFFFFFFFFFFFFFFFFFFFFFFFFFFFFFFFFFFFFFFFFFFFFFFFFFFFFFFFFFFFFFFFFFFFFFFFF  
FFFFFFF:FFFFFFFFFFFFFFFFFFFFFFFFFFFFFFFFFFFFFFFFFFFFFFFFFFFFFFFFFFFFFFFFFFFF:F  
@A00155:342:HHGFNDSXY:1:2449:26332:27962 1:N:0:GAACCTAG+TCCGCATA  
AGAGAGCGACTTCTCTCGGGCCACAGCCTTACAGCTGTGGAGCACGGTATCCTCTGCCGAAACAGAG  
GTTGGACAAGACCGGAGGGGTCTCCTAGTTCCAAAGGAGATGTACTCCGGGCTTGTTACGACCTACC  
+  
F,FFFFFFFFFFFFFFFFFFFF:FFFFFFFFF:FFFFFFFFFFFFFFFFFFFFFFFFFFFFFFFFFFFF:FFFFFFFFFFFFFFFFFFFF  
FFFF:FFFFFF:FFF:FFFFF:FFFFFF:FFFFFFFFFFFFFFFFFFFFFFFFFFFFFFFFFFFF:FFFFFFFFFFFFFFFFFFFF  
@A00155:342:HHGFNDSXY:1:2450:19560:2707 1:N:0:GAACCTAG+TCCGCATA  
TTAAGGACTCACCTCTGGCCTATGGTCATCTCAATGCCGAGAGGGATGTGGAGGGCGAGAGAGAGCGA  
CTTCTCTCGGGCCACAGCCTTACAGCTGTGGAGCACGGTATCCTCTGCCGAAACAGAGGTTGGACAA  
+  
FFFFFFFFFFFFFFFFFFFFFFFFFFFFFFFFFFFFFFFFFFFFFFFFFFFFFFFFFFFFFFFFFFFFFFFFFFFF:FFFFFFFFFFFFFFFFFFFFFFFFFFFF  
FFFFFFFFFFFFFFFFFFFFFFFFFFFFFFFFFFFFFFFFFFFFFFFFFFFFFFFFFFFFFFFFFFFFFFFFFFFF:FFFFFFFFFFFFF  
@A00155:342:HHGFNDSXY:1:2450:15203:9377 1:N:0:GAACCTAG+TCCGCATA  
GTCATCTCAATGCCGAGAGGGATGTGGAGGGCGAGAGAGAGCGACTTCTCTCGGGCCACAGCCTTAC  
AGCTGTGGAGCACGGTATCCTCTGCCGAAACAGAGGTTGGACAAGACCGGAGGGGTCTCCTAGTTCCA  
+  
FFFFFFFFFFFFFFFFFFFF:FFFFFFFFFFFFFFFFFFFFFFFFFFFFFFFFFFFFFFFFFFFFFFFFFFFFFFFFFFFF  
FFFFFFFFFFFFFFFFFFFFFFFFFFFFFFFFFFFFFFFFFFFFFFFFFFFFFFFFFFFFFFFFFFFFFFFFFFFF  
@A00155:342:HHGFNDSXY:1:2450:6225:10081 1:N:0:GAACCTAG+TCCGCATA  
ACTTCTCTCGGGCCACAGCCTTACAGCTGTGGAGCACGGTATCCTCTGCCGAAACAGAGGTTGGACA  
AGACCGGAGGGGTCTCCTAGTTCCAAAGGAGATGTACTCCGGGCTTGTTACGACCTACCGTGTAAGT  
+  
FFFFFFFFFFFFFFFFFFFFFFFFFFFFFFFFFFFFFFFFFFFFFFFFFFFFFFFFFFFFFFFFFFFFFFFFFFFF  
FFFFFFFFFFFFFFFFFFFFFFFFFFFFFFFFFFFFFFFFFFFFFFFFFFFFFFFFFFFFFFFFFFFFFFFFFFFF:FFFFFFFFFFFFFFFFFFFFFFFFFFFF  
@A00155:342:HHGFNDSXY:1:2450:2645:23328 1:N:0:GAACCTAG+TCCGCATA  
TGCCCCACCACACCGCCTTAGATCAGCTGTGTCCACTTAAGGACTCACCTCTGGCCTATGGTCATCTC  
AATGCCGAGAGGGATGTGGAGGGCGAGAGAGAGCGACTTCTCTCGGGCCACAGCCTTACAGCTGTGG  
+  
FFFFFFFFFFFFFFFFFFFFFFFFFFFFFFFFFFFFFFFFFFFFFFFFFFFFFFFFFFFFFFFFFFFFFFFFFFFF  
FFFFFFFFFFFFFFFFFFFFFFFFFFFFFFFFFFFFFFFFFFFFFFFFFFFFFFFFFFFFFFFFFFFFFFFFFFFF:FFFFFFFFFFFFF  
@A00155:342:HHGFNDSXY:1:2450:7563:29496 1:N:0:GAACCTAG+TCCGCATA  
AAGGACTCACCTCTGGCCTATGGTCATCTCAATGCCGAGAGGGATGTGGAGGGCGAGAGAGAGCGACT  
TCTCTCGGGCCACAGCCTTACAGCTGTGGAGCACGGTATCCTCTGCCGAAACAGAGGTTGGACAAGA  
+

FFFFFFFFFFFFFFFFFFFFFFFFFFFFFFFFFFFFFFFFFFFFFFFFFFFFFFFFFFFFFFFFFFFFFFFF  
FFFFFFFFFFFFFFFFFFFFFFFFFFFFFFFFFFFFFFFFFFFFFFFFFFFFFFFFFFFFFFFFFFFFFFFF:FFFFFFFFFFFFFFFF  
@A00155:342:HHGFNDSXY:1:2450:6867:29763 1:N:0:GAACCTAG+TCCGCATA  
GACTTCTCTCGGGCCACAGCCTTACAGCTGTGGAGCACGGTATCCTCTGCCGAAACAGAGGTTGGAC  
AAGACCGGAGGGGTCTCCTAGTTCAAAGGAGATGTACTCCGGGCTTGTTACGACCTACCGTGTAAAG  
+  
FFFFFFFFFFFFFFFFFFFFFFFF,FFFFFFFFFFFFFFFFFFFFFFFFFFFFFFFFFFFFFFFFFFFFFFFF:FFF  
FFFFFFFFFFFFFFFFFFFFFFFFFFFFFFFFFFFFFFFFFFFFFFFFFFFFFFFFFFFFFFFFFFFFFFFF:FFFFFFFFFFFFFFFF  
@A00155:342:HHGFNDSXY:1:2450:31738:30686 1:N:0:GAACCTAG+TCCGCATA  
TTACAGCTGTGGAGCACGGTATCCTCTGCCGAAACAGAGGTTGGACAAGACCGGAGGGGTCTCCTAGT  
TCAAAGGAGATGTACTCCGGGCTTGTTACGACCTACCGTGTAAAGTCGTAGTCTAGTAGGCTACCTG  
+  
FFFFFFFFFFFFFFFFFFFFFFFF:FFFFFFFFFFFFFFFFFFFFFFFFFFFFFFFFFFFFFFFFFFFFFFFF  
FFFFFFFFFFFFFFFFFFFFFFFFFFFFFFFFFFFFFFFFFFFFFFFFFFFFFFFFFFFFFFFFFFFFFFFF  
@A00155:342:HHGFNDSXY:1:2450:32298:34194 1:N:0:GAACCTAG+TCCGCATA  
GGATGTAGAGGGCGAGAGAGAGCGACTTCTCTCGGGCCACAGCCTTACAGCTGTGGAGCACGGTATC  
CTCTGCCGAAACAGAGGTTGGACAAGACCGGAGGGGTCTCCTAGTTCAAAGGAGATGTACTCC  
+  
FFF:FFFFFFFFFFFFFFFFFFFFFFFFFFFFFFFFFFFFFFFFFFFFFFFFFFFFFFFFFFFFFFFF:FFFFFFF  
FFFFFFFFFFFFFFFFFFFFFFFFFFFFFFFFFFFFFFFFFFFFFFFFFFFFFFFFFFFFFFFFFFFFFFFF:FFFFFFF  
@A00155:342:HHGFNDSXY:1:2452:25355:1846 1:N:0:GAACCTAG+TCCGCATA  
CCGAGAGGGATGTGGAGGGCGAGAGAGAGCGACTTCTCTCGGGCCACAGCCTTACAGCTGTGGAGCA  
CGGTATCCTCTGCCGAAACAGAGGTTGGACAAGACCGGAGGGGTCTCCTGGTTCAAAGGAGATGTAC  
+  
FFFFFFFFFFFFFFFFFFFFFFFFFFFFFFFFFFFFFFFFFFFFFFFFFFFFFFFFFFFFFFFFFFFFFFFF  
FFFFFFFFFFFFFFFFFFFFFFFFFFFFFFFFFFFFFFFFFFFFFFFFFFFFFFFFFFFFFFFFFFFFFFFF  
@A00155:342:HHGFNDSXY:1:2452:26729:4726 1:N:0:GAACCTAG+TCCGCATA  
GCTCCACAGCTGTAAGGCTGTGGGCCCGAGAGAAGTCGCTCTCTCTCGCCCTCCACATCCCTCTCGGC  
ATTGAGATGACCATAGGCCAGAGGTGAGTCCTTAAGTGACACAGCTGATCTAAGGCGGTGTGGTGGG  
+  
FFFFFFFFFFFFFFFFFFFFFFFFFFFFFFFFFFFFFFFFFFFFFFFFFFFFFFFFFFFFFFFFFFFFFFFF  
FFFFFFFFFFFFFFFFFFFFFFFFFFFFFFFFFFFFFFFFFFFFFFFFFFFFFFFFFFFFFFFFFFFFFFFF  
@A00155:342:HHGFNDSXY:1:2452:11053:7232 1:N:0:GAACCTAG+TCCGCATA  
GGACTCACCTCTGGCCTATGGTCATCTCAATGCCGAGAGGGATGTAGAGGGCGAGAGAGAGCGACTTC  
TCTCGGGCCACAGCCTTACAGCTGTGGAGCACGGTATCCTCTGCCGAAACAGAGGTTGGACAAGACC  
+  
FFFFFFFFFFFFFFFFFFFFFFFFFFFFFFFFFFFFFFFFFFFFFFFFFFFFFFFFFFFFFFFFFFFFFFFF  
FFFFFFFFFFFFFFFFFFFFFFFFFFFFFFFFFFFFFFFFFFFFFFFFFFFFFFFFFFFFFFFFFFFFFFFF  
@A00155:342:HHGFNDSXY:1:2452:22779:14638 1:N:0:GAACCTAG+TCCGCATA  
CCCGGAGTACATTTCTTTGGAAGTACTAGGAGACCCCTCCGGTCTTGTTCCAACCTCTGTTTCGGCAGAG  
ATACCGTGCTCCACAGCTGTAAGGCTGTGGGCCCGAGAGAAGTCGCTCTCTCTCGCCCTCCACA  
+  
FFFFFFFFFFFFFFFFFFFFFFFFFFFFFFFFFFFFFFFFFFFFFFFFFFFFFFFFFFFFFFFFFFFFFFFF  
FFFFFFFFFFFFFFFFFFFFFFFFFFFFFFFFFFFFFFFFFFFFFFFFFFFFFFFFFFFFFFFFFFFFFFFF,FF  
@A00155:342:HHGFNDSXY:1:2452:3079:23578 1:N:0:GAACCTAG+TCCGCATA  
TGCCGAGAGGGATGTGGAGGGCGAGAGAGAGCGACTTCTCTCGGGCCACAGCCTTACAGCTGTGGAG  
CACGGTATCCTCTGCCGAAACAGAGGTTGGACAAGACCGGAGGGGTCTCCTAGTTCAAAGGAGATGT  
+  
FFFFFFFFFFFFFFFFFFFFFFFFFFFFFFFFFFFFFFFFFFFFFFFFFFFFFFFFFFFFFFFFFFFFFFFF  
FFFFFFFFFFFFFFFFFFFFFFFFFFFFFFFFFFFFFFFFFFFFFFFFFFFFFFFFFFFFFFFFFFFFFFFF:FFFFFFF  
@A00155:342:HHGFNDSXY:1:2452:11388:26788 1:N:0:GAACCTAG+TCCGCATA  
AGGGATGTGGAGGGCGAGAGAGAGCGACTTCTCTCGGGCCACAGCCTTACAGCTGTGGAGCACGGTA  
TCCTCTGCCGAAACAGAGGTTGGACAAGACCGGAGGGGTCTCCTAGTTCAAAGGAGATGTACTCCGG  
+

FFFFFFFFFFFFFFFFFFFFFFFFFFFFFFFFFFFFFFFFFFFFFFFFFFFFFFFFFFFFFFFFFFFFFFFF  
FFFFFFFFFFFFFFFFFFFFFFFFFFFFFFFFFFFFFFFFFFFFFFFFFFFFFFFFFFFFFFFFFFFFFFFF  
@A00155:342:HHGFNDSXY:1:2452:26594:34554 1:N:0:GAACCTAG+TCCGCATA  
ACTTCTCTCGGGCCACAGCCTTACAGCTGTGGAGCACGGTATCCTCTGCCGAAACAGAGGTTGGACA  
AGACCGGAGGGGTCTCCTGGTTCCAAAGGAGATGTACTCCGGGCTTGTTACGACCTACCGTGTAAGT  
+  
FFFFFFFFFFFFFFFFFFFFFFFFFFFFFFFFFFFFFFFFFFFFFFFFFFFFFFFFFFFFFFFFFFFFFFFF  
FFFFFFFFFFFFFFFFFFFFFFFFFFFFFFFFFFFFFFFFFFFFFFFFFFFFFFFFFFFFFFFFFFFFFFFF  
@A00155:342:HHGFNDSXY:1:2452:17544:34601 1:N:0:GAACCTAG+TCCGCATA  
TGTTTCGGCAGAGGATACCGTGCTCCACAGCTGTAAGGCTGTGGGCCCGAGAGAAGTCGCTCTCTC  
GCCCTTACATCCCTCTCGGCATTGAGATGACCATAGGCCAGAGGTGAGTCCTTAAGTGGACACAGCT  
+  
FFFFFFFFFFFFFFFFFFFFFFFFFFFFFFFFFFFFFFFFFFFFFFFFFFFFFFFFFFFFFFFFFFFFFFFF  
FFFFFFFFFFFFFFFFFFFFFFFFFFFFFFFFFFFFFFFFFFFFFFFFFFFFFFFFFFFFFFFFFFFFFFFF  
@A00155:342:HHGFNDSXY:1:2453:29830:3208 1:N:0:GAACCTAG+TCCGCATA  
CTCCTCTGGCCTATGGTCATCTCAATGCCGAGAGGGATGTGGAGGGCGAGAGAGAGCGACTTCTCTC  
GGCCACAGCCTTACAGCTGTGGAGCACGGTATCCTCTGCCGAAACAGAGGTTGGACAAGACCGGAGG  
+  
FFFFFFFFFFFFFFFFFFFFFFFFFFFFFFFFFFFFFFFFFFFFFFFFFFFFFFFFFFFFFFFFFFFFFFFF  
FFFFFFFFFFFFFFFFFFFFFFFFFFFFFFFFFFFFFFFFFFFFFFFFFFFFFFFFFFFFFFFFFFFFFFFF  
@A00155:342:HHGFNDSXY:1:2453:21404:21308 1:N:0:GAACCTAG+TCCGCATA  
GAGAGAGCGACTTCTCTCGGGCCACAGCCTTACAGCTGTGGAGCACGGTATCCTCTGCCGAAACAGA  
GGTTGGACAAGACCGGAGGGGTCTCCTAGTTCCAAAGGAGATGTACTCCGGGCTTGTTACGACCTAC  
+  
FFFFFFFFFFFFFFFFFFFFFFFFFFFFFFFFFFFFFFFFFFFFFFFFFFFFFFFFFFFFFFFFFFFFFFFF  
FFFFFFFFFFFFFFFFFFFFFFFFFFFFFFFFFFFFFFFFFFFFFFFFFFFFFFFFFFFFFFFFFFFFFFFF  
@A00155:342:HHGFNDSXY:1:2453:3097:24737 1:N:0:GAACCTAG+TCCGCATA  
ATGCCGAGAGGGATGTGGGGGCGAGAGAGAGCGACTTCTCTCGGGCCACAGCCTTACAGCTGTGGA  
GCACGGTATCCTCTGCCGAAACAGAGGTTGGACAAGACCGGAGGGGTCTCCTAGTTCCAAAGGAGATG  
+  
FFFFFFFFFFFFFFFFFFFF,FFFFFFFFFFFFFFFFFFFFFFFFFFFFFFFFFFFFFFFFFFFFFFFFFFFF  
FFFFFFFFFFFFFFFFFFFFFFFFFFFFFFFFFFFFFFFFFFFFFFFFFFFFFFFFFFFFFFFFFFFFFFFF  
@A00155:342:HHGFNDSXY:1:2455:32895:11584 1:N:0:GAACCTAG+TCCGCATA  
AAGACTCACCTCTGGCCTATGGTCATCTCAATGCCGAGAGGGATGTGGAGGGCGAGAGAGAGCGACTT  
CTCTCGGGCCACAGCCTTACAGCTGTGGAGCACGGTATCCTCTGCCGAAACAGAGGTTGGACAAGAC  
+  
FFF:FFFFFFFFFFFFFFFFFFFFFFFFFFFFFFFFFFFFFFFFFFFFFFFFFFFFFFFFFFFFFFFFFFFF  
FFFFFFFFFFFFFFFFFFFFFFFFFFFFFFFFFFFFFFFFFFFFFFFFFFFFFFFFFFFFFFFFFFFFFFFF  
@A00155:342:HHGFNDSXY:1:2455:8205:12414 1:N:0:GAACCTAG+TCCGCATA  
AGTACATCTCCTTTGGAAGTAGGAGACCCCTCCGGTCTTGTTCCAACCTCTGTTTCGGCAGAGGATACC  
GTGCTCCACAGCTGTAAGGCTGTGGGCCCGAGAGAAGTCGCTCTCTCTCGCCCTCCACATCCCTCTCG  
+  
FFFFFF:F:FF:FFFFFFF::FFF,FFFFFFFFFFFFFFFFFFFFFFFFFFFFFFFFFFFFFFFFFFFF  
FFFFFFFFFFFFFFFFFFFFFFFFFFFFFFFFFFFFFFFFFFFFFFFFFFFFFFFFFFFFFFFFFFFFFFFF  
@A00155:342:HHGFNDSXY:1:2455:25708:16391 1:N:0:GAACCTAG+TCCGCATA  
TGGTCATCTCTATGCCGAGAGGGATGTGGAGGGCGAGAGAGAGCGACTTCTCTCGGGCCACAGCCTT  
ACAGCTGTGGAGCACGGTATCCTCTGCCGAAACAGAGGTTGGACAAGACCGGAGGGGTCTCCTAGTTC  
+  
FFFFFFFFFFFFFFFFFFFF,FFFF,FFFFFFFFFFFF:FFFFFFFFFFFFFFFFFFFFFFFFFFFFFFFF  
FFFFFFFFFFFFFFFFFFFFFFFFFFFFFFFFFFFFFFFFFFFFFFFFFFFFFFFFFFFFFFFFFFFFFFFF  
@A00155:342:HHGFNDSXY:1:2456:24623:17644 1:N:0:GAACCTAG+TCCGCATA  
GTCCAACCTCTGTTTCGGCAGAGGATACCGTGCTCCACAGCTGTAAGGCTGTGGGCCCGAGAGAAGTC  
GCTCTCTCTCGCCCTCCACATCCCTCTCGGCATTGAGATGACCATAGGCCAGAGGTGAGTCTTTAAGT  
+

FFFFFFFFFFFFFFFFFFFFFFFFFFFFFFFFFFFFFFFFFFFFFFFFFFFFFFFFFFFFFFFFFFFFFFFFFFFFFFFF  
FFFFFFFFFFFFFFFFFFFFFFFFFFFFFFFFFFFFFFFFFFFFFFFFFFFFFFFFFFFFFFFFFFFFFFFFFFFFFFFF:FFFFFFFFFFFFFFFF  
@A00155:342:HHGFNDSXY:1:2456:3947:30906 1:N:0:GAACCTAG+TCCGCATA  
GAGCGACTTCTCTCGGGCCACAGCCTTACAGCTGTGGAGCACGGTATCCTCTGCCGAAACAGAGGTT  
GGACAAGACCGGAGGGGTCTCCTAGTTCCAAAGGAGATGTACTCCGGGCTTGTTACGACCTACCGTG  
+  
FFFFFFFFFFFFFFFF:FFFFFFFF,FFFF:FFFFFFFFFFFFFFFFFFFFFFFFFFFFFFFFFFFFFFFFFFFFFFFF  
FFFFFFFFFFFFFFFFFFFFFFFFFFFFFFFFFFFFFFFFFFFFFFFFFFFFFFFFFFFFFFFFFFFFFFFFFFFFFFFF:FF  
@A00155:342:HHGFNDSXY:1:2457:16884:20870 1:N:0:GAACCTAG+TCCGCATA  
GTCCAACCTCTGTTTCGGCAGAGGATACCGTGCTCCACAGCTGTAAGGCTGTGGGCCCCGAGAGAAGTC  
GCTCTCTCTCGCCCTTCACATCCCTCTCGGCATTGAGATGACCATAGGCCAGAGGTGAGTCCTTAAGT  
+  
FFFFFFFFFFFFFFFFFFFFFFFFFFFFFFFFFFFFFFFFFFFFFFFFFFFFFFFFFFFFFFFFFFFFFFFFFFFFFFFF,FFFFFFFFFFFFFFFFFFFFFFFFFFFFFFFFFFFFFFFF  
FFFFFFFFFFFFFFFFFFFFFFFFFFFFFFFFFFFFFFFFFFFFFFFFFFFFFFFFFFFFFFFFFFFFFFFFFFFFFFFF,FFFFFFFFFFFFFFFFFFFFFFFFFFFFFFFFFFFFFFFF  
@A00155:342:HHGFNDSXY:1:2457:14904:26490 1:N:0:GAACCTAG+TCCGCATA  
ATGCCGAGAGGGATGTGGAGGGCGAGAGAGAGCGACTTCTCTCGGGCCACAGCCTTACAGCTGTGGA  
GCACGGTATCCTCTGCCGAAACAGAGGTTGGACAAGACCGGAGGGGTCTCCTAGTTCCAAAGGAGATG  
+  
FFFFFFFFF:FFF::FFFFFFFFFFFFFFFF,FFFFFFFFFFFFFFFFFFFFFFFFFFFFFFFFFFFFFFFF:FFFFFFFF  
FFFFFFFFFFFFFFFFFFFFFFFFFFFFFFFFFFFFFFFFFFFFFFFFFFFFFFFFFFFFFFFFFFFFFFFFFFFFFFFF  
@A00155:342:HHGFNDSXY:1:2458:4309:3662 1:N:0:GAACCTAG+TCCGCATA  
AGCGACTTCTCTCGGGCCACAGCCTTACAGCTGTGGAGCACGGTATCCTCTGCCGAAACAGAGGTTG  
GACAAGACCGGAGGGGTCTCCTAGTTCCAAAGGAGATGTACTCCGGGCTTGTTACGACCTACCGTGT  
+  
FFFFFFFFFFFFFFFFFFFFFFFFFFFFFFFFFFFFFFFFFFFFFFFFFFFFFFFFFFFFFFFFFFFFFFFFFFFFFFFF:FFFFF::FFFFFFFFFFFFFFFFFFFFFFFF  
FFFFFFFFFFFFFFFFFFFFFFFF:FFFFFFFFFFFFFFFF,FFFFFFFFFFFFFFFFFFFFFFFFFFFFFFFF:FFFFFFFFF:FF  
@A00155:342:HHGFNDSXY:1:2458:23981:23766 1:N:0:GAACCTAG+TCCGCATA  
AGAGAGAGCGACTTCTCTCGGGCCACAGCCTTACAGCTGTGGAGCACGGTATCCTCTGCCGAAACAG  
AGGTTGGACAAGACCGGAGGGGTCTCCTAGTTCCAAAGGAGATATACTCCGGGCTTGTT  
+  
FFFFFFFFFFFFFFFFFFFFFFFFFFFFFFFFFFFFFFFFFFFFFFFFFFFFFFFFFFFFFFFFFFFFFFFFFFFFFFFF,F  
FFFFFFFFFFFFFFFFFFFFFFFFFFFFFFFFFFFFFFFFFFFFFFFFFFFFFFFFFFFFFFFFFFFFFFFFFFFFFFFF  
@A00155:342:HHGFNDSXY:1:2458:20365:33223 1:N:0:GAACCTAG+TCCGCATA  
TGTCCACTTAAGGACTCACCTCTGGCCTATGGTCATCTCAATGCCGAGAGGGATGTGGAGGGCGAGAG  
AGAGCGACTTCTCTCGGGCCACAGCCTTACAGCTGTGGAGCACGGTATCCTCTGCCGAAACAGAGGT  
+  
FFFFFFFFFFFFFFFFFFFFFFFFFFFFFFFFFFFFFFFFFFFFFFFFFFFFFFFFFFFFFFFFFFFFFFFFFFFFFFFF:F:FFFFFFFFFFFFFFFFFFFFFFFF  
FFFFFFFFF:FFFFFFFFFFFFFFFFFFFFFFFFFFFFFFFFFFFFFFFFFFFFFFFFFFFFFFFFFFFFFFFF,FFFFFFFFFFFFFFFFFFFFFFFF  
@A00155:342:HHGFNDSXY:1:2459:2682:26365 1:N:0:GAACCTAG+TCCGCATA  
TCTCGGGCCACAGCCTTACAGCTGTGGAGCACGGTATCCTCTGCCGAAACAGAGGTTGGACAAGACC  
GGAGGGGTCTCCTAGTTCCAAAGGAGATGTACTCCGGGCTTGTTACGACCTACCGTGTAAGTCGTAG  
+  
FFFFFFFFFFFFFFFFFFFFFFFFFFFFFFFFFFFFFFFFFFFFFFFFFFFFFFFFFFFFFFFFFFFFFFFFFFFFFFFF  
FFFFFFFFFFFFFFFF,FFFFFFFFFFFFFFFFFFFFFFFFFFFFFFFFFFFFFFFFFFFFFFFFFFFFFFFF,FFFFF:FFFFFFFF  
@A00155:342:HHGFNDSXY:1:2459:15302:26428 1:N:0:GAACCTAG+TCCGCATA  
CAGCCTTACAGCTGTGGAGCACGGTATCCTCTGCCGAAACAGAGGTTGGACAAGACCGGAGGGGTCTC  
CTAGTTCCAAAGGAGATGTACTCCGGGCTTGTTACGACCTACCGTGTAAGTCGTAGTAGGCT  
+  
FFFFF,FFFFFFFFFFFFFFFFFFFFFFFFFFFFFFFFFFFFFFFFFFFFFFFFFFFFFFFFFFFFFFFFFFFFFFFF  
FFFFFFFFFFFFFFFFFFFFFFFFFFFFFFFFFFFFFFFFFFFFFFFFFFFFFFFFFFFFFFFFFFFFFFFFFFFFFFFF  
@A00155:342:HHGFNDSXY:1:2460:30698:3677 1:N:0:GAACCTAG+TCCGCATA  
TTCTCTCGGGCCACAGCCTTACAGCTGTGGAGCACGGTATCCTCTGCCGAAACAGAGGTTGGACAAG  
ATCGGAGGGGTCTCCTAGTTCCAAAGGAGATGTACTCCGGGCTTGTTACGACCTACCGTGTAAGTCG  
+

FFFFFFFFFFFFFFFFFFFFFFFFFFFFFFFFFFFFFFFFFFFFFFFFFFFFFFFFFFFFFFFFFFFFFFFF  
FFFFFFFFFFFFFFFFFFFFFFFFFFFFFFFFFFFFFFFFFFFFFFFFFFFFFFFFFFFFFFFFFFFFFFFF  
@A00155:342:HHGFNDSXY:1:2460:18620:4429 1:N:0:GAACCTAG+TCCGCATA  
GAGCGACTTCTCTCGGGCCCACAGCCTTACAGCTGTGGAGCACGGTATCCTCTGCCGAAACAGAGGTT  
GGACAAGACCGGAGGGGTCTCCTAGTTCCAAAGGAGATGTACTCCGGGCTTGTTACGACCTACCGTG  
+  
FFFFFFFFFFFFFFFFFFFFFFFFFFFFFFFFFFFFFFFFFFFFFFFFFFFFFFFFFFFFFFFFFFFFFFFF  
FFFFFFFFFFFFFFFFFFFFFFFFFFFFFFFFFFFFFFFFFFFFFFFFFFFFFFFFFFFFFFFFFFFFFFFF  
@A00155:342:HHGFNDSXY:1:2460:8205:9878 1:N:0:GAACCTAG+TCCGCATA  
GCGACTTCTCTCGGGCCCACAGCCTTACAGCTGTGGAGCACGGTATCCTCTGCCGAAACAGAGGTTGG  
ACAAGACCGGAGGGGTCTCCTAGTTCCAAAGGAGATGTACTCCGGGCTTGTTACGACCTACCGTGTA  
+  
FFFFFFFFFFFFFFFFFFFFFFFFFFFFFFFFFFFFFFFFFFFFFFFFFFFFFFFFFFFFFFFFFFFFFFFF:FFFF  
FFFF,FFFFFFFFFFFFFFFFFFFFFFFFFFFFFFFFFFFFFFFFFFFFFFFFFFFFFFFFFFFFFFFFFFFF  
@A00155:342:HHGFNDSXY:1:2460:30364:13463 1:N:0:GAACCTAG+TCCGCATA  
GTAAGGCTGTGGGCCCCGAGAGAAGTCGCTCTCTCTCGCCCTCCACATCCCTCTCGGCATTGAGATGAC  
CATAGGCCAGAGGTGAGTCCTTAAGTGACACAGCTGATCTAAGGCGGTGTGGCGGGGCATGGGTTTG  
+  
FFFFFFFFFFFFFFFFFFFFFFFFFFFFFFFFFFFFFFFFFFFFFFFFFFFFFFFFFFFFFFFFFFFFFFFF  
FFFFFFFFFFFFFFFFFFFFFFFFFFFFFFFFFFFFFFFFFFFFFFFFFFFFFFFFFFFFFFFFFFFFFFFF  
@A00155:342:HHGFNDSXY:1:2460:6605:23390 1:N:0:GAACCTAG+TCCGCATA  
GTCGCTCTCTCTCGCCCTCCACATCCCTCTCGGCATTGAGATGACCATAGGCCAGAGGTGAGTCCTTA  
AGTGACACAGCTGATCTAAGGCGGTGTGGCGGGGCATGGGTTTGAACCCCATGACGGTCGGAGTCT  
+  
F:FFFFFFFFFFFFFFFFFFFFFFFFFFFFFFFFFFFFFFFFFFFFFFFFFFFFFFFFFFFFFFFFFFFF:FFFF  
FFFFFFFFFFFFFFFFFFFFFFFFFFFFFFFFFFFFFFFFFFFFFFFFFFFFFFFFFFFFFFFFFFFF:FFFF  
@A00155:342:HHGFNDSXY:1:2460:5412:23860 1:N:0:GAACCTAG+TCCGCATA  
CTTCTCTCGGGCCCACAGCCTTACAGCTGTGGAGCACGGTATCCTCTGCCGAAACAGAGGTTGGACAA  
GACCGGAGGGGTCTCCTGGTTCCAAAGGAGATGTACTCCGGGCTTGTTACGACCTACCGTGTAAGTC  
+  
FFFFFFFFFFFFFFFFFFFFFFFFFFFFFFFFFFFFFFFFFFFFFFFFFFFFFFFFFFFFFFFFFFFF:FFFF  
FFFFF:FFFFFFFFFFFFFFFFFFFFFFFFFFFFFFFFFFFFFFFFFFFFFFFFFFFFFFFFFFFFF,FFFFFFFFFFFF:FFFFF:FFF:  
@A00155:342:HHGFNDSXY:1:2461:5764:18082 1:N:0:GAACCTAG+TCCGCATA  
ATCTCAATGCCGAGAGGGATGTGGAGGGCGAGAGAGAGCGACTTCTCTCGGGCCCACAGCCTTACAGC  
TGTGGAGCACGGTATCCTCTGCCGAAACAGAGGTTGGACAAGACCGGAGGGGTCTCCTAGTTCCAAAG  
+  
FFFFFFFFFFFFFFFFFFFFFFFFFFFFFFFFFFFFFFFFFFFFFFFFFFFFFFFFFFFFFFFFFFFF  
FFFFFFFFFFFFFFFFFFFFFFFFFFFFFFFFFFFFFFFFFFFFFFFFFFFFFFFFFFFFFFFFFFFF:FFFF:  
@A00155:342:HHGFNDSXY:1:2461:24270:21230 1:N:0:GAACCTAG+TCCGCATA  
TGTAAGGGGCGAGAGAGAGCGACTTCTCTCGGGCCCACAGCCTTACAGCTGTGGAGCACGGTATCCTC  
TGCCGAAACAGAGGTTGGACAAGACCGGAGGGGTCTCCTAGTTCCAAAGGAGATGTACTCCGGG  
+  
FFFFFFFFFFFFFFFFFFFFFFFFFFFFFFFFFFFFFFFFFFFFFFFFFFFFFFFFFFFFFFFFFFFF  
FFFFFFFFFFFFFFFFFFFFFFFFFFFFFFFFFFFFFFFFFFFFFFFFFFFFFFFFFFFFFFFFFFFF  
@A00155:342:HHGFNDSXY:1:2462:30996:26115 1:N:0:GAACCTAG+TCCGCATA  
CTTCTCTCGGGCCCACAGCCTTACAGCTGTGGAGCACGGTATCCTCTGCCGAAACAGAGGTTGGACAA  
GACCGGAGGGGTCTCCTAGTTCCAAAGGAGATGTACTCCGGGCTTGTTACGACCTACCGTGTAAGTC  
+  
FFFFFFFFFFFFFFFFFFFFFFFFFFFFFFFFFFFFFFFFFFFFFFFFFFFFFFFFFFFFFFFFFFFF:FFFF  
FFFFFFFFFFFFFFFFFFFFFFFFFFFFFFFFFFFFFFFFFFFFFFFFFFFFFFFFFFFFFFFFFFFF  
@A00155:342:HHGFNDSXY:1:2463:16251:12821 1:N:0:GAACCTAG+TCCGCATA  
TTCTCTCGGGCCCACAGCCTTACAGCTGTGGAGCACGGTATCCTCTGCCGAAACAGAGGTTGGACAAG  
ACCGGAGGGGTCTCCTAGTTCCAAAGGAGATGTACTCCGGGCTTGTTACGACCTACCGTGTAAGTCG  
+

FFFFFFFF:FFFFFF,F,F:FFFFFF,:FFFF:FF:FFFFFF:FFF:FFFFFFFFFFFFFFFF  
FFFFFFFF:FFF,FFF:FF:FFF,FFFF:FFFF,FFF:,FFF:FFF:F:FFF:F:FFFFFFFF  
@A00155:342:HHGFNDSXY:1:2464:22453:2018 1:N:0:GAACCTAG+TCCGCATA  
GAGAGGGATGTGGAGGGCGAGAGAGAGCGACTTCTCTCGGGCCACAGCCTTACAGCTGTGGAGCACG  
GTATCCTCTGCCGAAACAGAGGTTGGACAAGACCGGAGGGGTCTCCTAGTTCCAAAGGAGATGTACTC  
+  
FFFFFFFFFFFFFFFFFFFFFFFFFFFFFFFFFFFFFFFFFFFFFFFFFFFFFFFFFFFFFFFF:FFFFFFF  
FF:FF:FFFFFFFFFFFFFFFFFFFFFFFFFFFFFFFFFFFFFFFFFFFFFFFF:FFFFFFFFFFFFFFFF  
@A00155:342:HHGFNDSXY:1:2464:22634:2926 1:N:0:GAACCTAG+TCCGCATA  
GAGAGGGATGTGGAGGGCGAGAGAGAGCGACTTCTCTCGGGCCACAGCCTTACAGCTGTGGAGCACG  
GTATCCTCTGCCGAAACAGAGGTTGGACAAGACCGGAGGGGTCTCCTAGTTCCAAAGGAGATGTACTC  
+  
FFFFFFFFFFFFFFFFFFFFFFFFFFFFFFFFFFFFFFFFFFFFFFFFFFFFFFFFFFFFFFFF  
FFFFFFFFFFFFFFFFFFFFFFFFFFFFFFFFFFFFFFFFFFFFFFFFFFFFFFFFFFFFFFFF  
@A00155:342:HHGFNDSXY:1:2464:11722:13526 1:N:0:GAACCTAG+TCCGCATA  
CTTCTCTCGGGCCACAGCCTTACAGCTGTGGAGCACGGTATCCTCTGCCGAAACAGAGGTTGGACAA  
GACCGGAGGGGTCTCCTAGTTCCAAAGGAGATGTACTCCGGGCTTGTTACGACCTACC  
+  
FFFFFFFFFFFFFFFFFFFFFFFFFFFFFFFFFFFFFFFFFFFFFFFFFFFFFFFFFFFFFFFF  
:FFFFFFFFFFFFFFFFFFFFFFFFFFFFFFFFFFFFFFFFFFFFFFFFFFFFFFFF  
@A00155:342:HHGFNDSXY:1:2464:28149:15828 1:N:0:GAACCTAG+TCCGCATA  
GCCACAGCCTTACAGCTGTGGAGCACGGTATCCTCTGCCGAAACAGAGGTTGGACAAGACCGGAGGG  
GTCTCCTAGTTCCAAAGGAGATGTACTCCGGGCTTGTTACGACCTACCGTGTAAGTCGTCGTCTAGT  
+  
,FFFFFF:FF,:FFFF,FFF:FFFFFF:::,FFFFFFFFFFFF:,:FFF:FFFFFF,F:FFFFFF:  
FFFFFFFFFFF:F,:FF:FFFF,F:F:FFFF,FFFF:FFFF:F:FFF,FFF,:FFFF,F:F:FFF  
@A00155:342:HHGFNDSXY:1:2464:20943:36980 1:N:0:GAACCTAG+TCCGCATA  
AGAGAGAGCGACTTCTCTCGGGCCACAGCCTTACAGCTGTGGAGCACGGTATCCTCTGCCGAAACAG  
AGGTTGGACAAGACCGGAGGGGTCTCCTAGTTCCAAAGGAGATGTACTCCGGGCTTGTTACGACCTA  
+  
FFFFFFFFFFFFFFFFFFFFFFFFFFFFFFFFFFFFFFFFFFFFFFFFFFFFFFFFFFFFFFFF  
FFFFFFFFFFFF:FFFFFFFFFFFFFFFFFFFFFFFFFFFFFFFFFFFFFFFFFFFFFFFF  
@A00155:342:HHGFNDSXY:1:2465:32353:1626 1:N:0:GAACCTAG+TCCGCATA  
GGATGTGGAGGGCGAGAGAGAGCGACTTCTCTCGGGCCACAGCCTTACAGCTGTGGAGCACGGTATC  
CTCTGCCGAAACAGAGGTTGGACAAGACCGGAGGGGTCTCCTAGTTCCAAAGGAGATGTACTCC  
+  
FFFFFFFFFFFFFFFFFFFFFFFFFFFFFFFFFFFFFFFFFFFFFFFFFFFFFFFFFFFFFFFF  
FFFFFFFFFFFF,FFFFFFFFFFFF:FFFFFFFFFFFFFFFFFFFF,FFFF:F:FFFFFFFFFFFF  
@A00155:342:HHGFNDSXY:1:2465:3061:8609 1:N:0:GAACCTAG+TCCGCATA  
TCTCAATGCCGAGAGGGATGTGGAGGGCGAGAGAGAGCGACTTCTCTCGGGCCACAGCCTTACAGCT  
GTGGAGCACGGTATCCTCTGCCGAAACAGAGGTTGGACAAGACCGGAGGGGTCTCCTAGTTCCAAAGG  
+  
FFFFFFFFFFFFFFFFFFFFFFFFFFFFFFFFFFFFFFFFFFFFFFFFFFFFFFFFFFFFFFFF  
FFFFFFFFFFFFFFFFFFFFFFFFFFFFFFFFFFFFFFFFFFFFFFFFFFFFFFFF:FFFFFFFFFFFFFFFF  
@A00155:342:HHGFNDSXY:1:2465:12020:11506 1:N:0:GAACCTAG+TCCGCATA  
GGA CTACCTCTGGCCTATGGTCATCTCAATGCCGAGAGGGATGTAGAGGGCGAGAGAGAGCGACTTC  
TCTCGGGCCACAGCCTTACAGCTGTGGAGCACGGTATCCTCTGCCGAAACAGAGGTTGGACAAGACC  
+  
FFFFFFFFF:FFFFFFFFFFFFFFFFFFFFFFFFFFFFFFFFFFFFFFFFFFFFFFFFFFFFFFFF  
FFFF:FFFFFFFFFFFFFFFFFFFFFFFFFFFFFFFF:FFFF:F:FFFFFFFFFFFFFFFF:FFFFF  
@A00155:342:HHGFNDSXY:1:2465:24596:14873 1:N:0:GAACCTAG+TCCGCATA  
GACTTCTCTCGGGCCACAGCCTTACAGCTGTGGAGCACGGTATCCTCTGCCGAAACAGAGGTTGGAC  
AAGACCGGAGGGGTCTCCTAGTTCCAAAGGAGATGTACTCCGGGCTTGTTACGACCTACCGTGTAAG  
+

FFFFFFFFFFFFFFFFFFFFFFFFFFFFFFFFFFFFFFFFFFFFFFFFFFFFFFFFFFFFFFFFFFFFFFFFFFFFFFFF  
FFFFFFFFFFFFFFFFFFFFFFFFFFFFFFFFFFFFFFFFFFFFFFFFFFFFFFFFFFFFFFFFFFFFFFFFFFFFFFFF:FFF,F  
@A00155:342:HHGFNDSXY:1:2465:21486:17096 1:N:0:GAACCTAG+TCCGCATA  
GGATGTGGAGGGCGAGAGAGAGCGACTTCTCTCGGGCCACAGCCTTACAGCTGTGGAGCACGGTATC  
CTCTGCCGAAACAGAGGTTGGACAAGACCGGAGGGGTCTCCTAGTTCCAAAGGAGATGTACTCC  
+  
FFF:FFFFFFFFFFFFFFFFFFFFFFFFFFFFFFFFFFFFFFFFFFFFFFFFFFFFFFFFFFFFFFFFFFFFFFFF  
FFF:FFFFFFFFFFFFFFFFFFFFFFFFFFFFFFFFFFFFFFFFFFFFFFFFFFFFFFFFFFFFFFFFFFFFFFFF  
@A00155:342:HHGFNDSXY:1:2465:12255:20901 1:N:0:GAACCTAG+TCCGCATA  
GGACTCACCTCTGGCCTATGGTCATCTCAATGCCGAGAGGGATGTGAAGGGCGAGAGAGAGCGACTTC  
TCTCGGGCCACAGCCTTACAGCTGTGGAGCACGGTATCCTCTGCCGAAACAGAGGTTGGACAAGACC  
+  
FFFFFFFFFFFFFFFFFFFFFFFFFFFFFFFFFFFFFFFFFFFFFFFFFFFFFFFFFFFFFFFFFFFFFFFF:FFFFFFF  
FFFFFFFFFFFFFFFFFFFFFFFFFFFFFFFFFFFFFFFFFFFFFFFFFFFFFFFFFFFFFFFFFFFFFFFF,FFFFFFFFFFFFFFFF:FF  
@A00155:342:HHGFNDSXY:1:2465:31213:21793 1:N:0:GAACCTAG+TCCGCATA  
CTTCTCTCGGGCCACAGCCTTACAGCTGTGGAGCACGGTATCCTCTGCCGAAACAGAGGTTGGACAA  
GACCGGAGGGGTCTCTTAGTTCCAAAGGAGATGTACTCCGGGCTTGTTACGACCTACC  
+  
FFFFFFFFFFFFFFFFFFFFFFFFFFFFFFFFFFFFFFFFFFFFFFFFFFFFFFFFFFFFFFFFFFFFFFFFFFFF  
FFFFFFFFFFFFFFFFFFFFFFFFFFFFFFFFFFFFFFFFFFFFFFFFFFFFFFFFFFFFFFFFFFFFFFFFFFFF  
@A00155:342:HHGFNDSXY:1:2465:5086:30749 1:N:0:GAACCTAG+TCCGCATA  
GGATGTAGAGGGCGAGAGAGAGCGACTTCTCTCGGGCCACAGCCTTACAGCTGTGGAGCACGGTATC  
CTCTGCCGAAACAGAGGTTGGACAAGACCGGAGGGGTCTCCTAGTTCCAAAGGAGATGTACTCC  
+  
FF,FFFFFFFFFFFFFFFFFFFFFFFFFFFFFFFFFFFFFFFFFFFFFFFFFFFFFFFFFFFFFFFFFFFFFFFF  
FFFFFFFFFFFFFFFFFFFFFFFFFFFFFFFFFFFFFFFFFFFFFFFFFFFFFFFFFFFFFFFFFFFFFFFFFFFF  
@A00155:342:HHGFNDSXY:1:2466:30960:35415 1:N:0:GAACCTAG+TCCGCATA  
TAGTCTAGTAGGCTACCTGACGAGTCCTTTTAGGACGAACTTACACAACCTCGAAGAGTAACGACGG  
TTTCGTCCTTGGAACGGACTIONCATCAGGGAGCCTACTAGACTCCGACCGTCATGGGGGTCAAACCCA  
+  
FFFFFFFFFFFFFFFFFFFFFFFFFFFFFFFFFFFFFFFFFFFFFFFFFFFFFFFFFFFFFFFFFFFFFFFF,::FFFFFFFFFFFFFFFFFFFFFFFFFFFFFFFFFFFFFFFFFFFFFFFFFFFFFFFFFFFFFFFF  
FFFFFFFF:FFFFFFFF:FFFFFFFFFFFFFFFFFFFFFFFFFFFFFFFFFFFFFFFFFFFFFFFFFFFFFFFFFFFFFFFF  
@A00155:342:HHGFNDSXY:1:2467:16857:14434 1:N:0:GAACCTAG+TCCGCATA  
TGTCCACTTAAGGACTCACCTCTGGCCTATGGTCATCTCAATGCCGAGAGGGATGTGAAGGGCGAGAG  
AGAGCGACTTCTCTCGGGCCACAGCCTTACAGCTGTGGAGCACGGTATCCTCTGCCGAAACAGAGGT  
+  
FFFFFFFFFFFFFF:FFFFFFFFFFFFFFFFFFFFFFFFFFFFFFFFFFFFFFFFFFFFFFFFFFFFFFFF,FFFFFFFFFFFFFFFFFFFFFFFF  
FFFFFFFFF,:FFF:FFFFFFFFFFFFFFFFFFFFFFFFFFFFFFFFFFFFFFFFFFFFFFFFFFFFFFFF:FFFFFFFFFFFFFFFF  
@A00155:342:HHGFNDSXY:1:2467:6587:23735 1:N:0:GAACCTAG+TCCGCATA  
AATGCCGAGAGGGATGTAGAGGGCGAGAGAGAGCGACTTCTCTCGGGCCACAGCCTTACAGCTGTGG  
AGCACGGTATCCTCTGCCGAAACAGAGGTTGGACAAGACCGGAGGGGTCTCCTAGTTCCAAAGGAGAT  
+  
FFFFFFFFFFFFFFFFFFFFFFFFFFFFFFFFFFFFFFFFFFFFFFFFFFFFFFFFFFFFFFFFFFFFFFFF:FFFFFFFFFFFFFFFFFFFFFFFFFFFFFFFFFFFFFFFFFFFFFFFFFFFFFFFF:FFF  
FFFFFFFFFFFFFFFFFFFFFFFFFFFFFFFFFFFFFFFFFFFFFFFF:F:FFFFFFFFFFFFFFFFFFFFFFFFFFFFFFFFFFFFFFFFFFFFFFFFFFFFFFFF  
@A00155:342:HHGFNDSXY:1:2467:6542:23750 1:N:0:GAACCTAG+TCCGCATA  
AATGCCGAGAGGGATGTAGAGGGCGAGAGAGAGCGACTTCTCTCGGGCCACAGCCTTACAGCTGTGG  
AGCACGGTATCCTCTGCCGAAACAGAGGTTGGACAAGACCGGAGGGGTCTCCTAGTTCCAAAGGAGAT  
+  
FFFFF:FFFFFFFFFFFFFFFFFFFFFFFFFFFFFFFFFFFFFFFFFFFFFFFFFFFFFFFFFFFFFFFFFFFFFFFF  
FFFFFFFFFFFFFFFFFFFFFFFFFFFFFFFFFFFFFFFFFFFFFFFFFFFFFFFFFFFFFFFFFFFFFFFF:FFFFFFFFFFFFFFFFFFFFFFFFFFFFFFFFFFFFFFFF  
@A00155:342:HHGFNDSXY:1:2467:7337:25003 1:N:0:GAACCTAG+TCCGCATA  
AATGCCGAGAGGGATGTAGAGGGCGAGAGAGAGCGACTTCTCTCGGGCCACAGCCTTACAGCTGTGG  
AGCACGGTATCCTCTGCCGAAACAGAGGTTGGACAAGACCGGAGGGGTCTCCTAGTTCCAAAGGAGAT  
+

FFFFFFFFFFFFFFFF:F,FFFFFFFFFFFF,FFFFFFFFFFFFFFFFFFFFFFFFFFFFFFFF:FF,:FFFF:FFFF  
FFFFFFFFFFFFFFFFFFFFFFFFFFFFFFFFFFFFFFFFFFFFFFFFFFFFFFFFFFFFFFFF:FFFFFFFFFFFFFFFFFFFFF  
@A00155:342:HHGFNDSXY:1:2468:20862:2174 1:N:0:GAACCTAG+TCCGCATA  
CTTCTCTCGGGCCACAGCCTTACAGCTGTGGAGCACGGTATCCTCTGCCGAAACAGAGGTTGGACAA  
GACCGGAGGGGTCTCCTGGTTCCAAAGGAGATGTACTCCGGGCTTGTTACGACCTACCGTGTAAGTC  
+  
FFFFFFFFFFFFFFFFFFFFFFFFFFFFFFFFFFFFFFFFFFFFFFFFFFFFFFFFFFFFFFFFFFFFF  
FFFFFFFFFFFFFFFFFFFFFFFFFFFFFFFFFFFFFFFFFFFFFFFFFFFFFFFFFFFFFFFFFFFFF  
@A00155:342:HHGFNDSXY:1:2468:10004:6073 1:N:0:GAACCTAG+TCCGCATA  
ACTTCTCTCGGGCCACAGCCTTACAGCTGTGGAGCACGGTATCCTCTGCCGAAACAGAGGTTGGACA  
AGACCGGAGGGGTCTCCTAGTTCCAAAGGAGATGTACTCCGGGCTTGTTACGACCTACCGTGTAAGT  
+  
FFFFFFFFFFFFFFFFFFFFFFFFFFFFFFFFFFFFFFFFFFFFFFFFFFFFFFFFFFFFFFFFFFFF:FFF  
FFFFFFFFFFFFFFFFFFFFFFFFFFFFFFFFFFFFFFFFFFFFFFFFFFFFFFFFFFFFFFFFFFFF:,F  
@A00155:342:HHGFNDSXY:1:2468:1678:13228 1:N:0:GAACCTAG+TCCGCATA  
AGACTCACCTCTGGCCTATGGTCATCTCAATGCCGAGAGGGATGTGGAGGGCGAGAGAGAGCGACTTC  
TCTCGGGCCACAGCCTTACAGCTGTGGAGCACGGTATCCTCTGCCGAAACAGAGGTTGGACAAGACC  
+  
FFFFFFFFFFFFFFFFFFFF,FFFFFFFFFFFFFFFFFFFFFFFFFFFFFFFF:FFFFFFFFF:FFFFFFFFFFFFFFFF  
FFFFFFFFFFFFFFFFFFFFFFFFFFFFFFFFFFFFFFFFFFFFFFFFFFFFFFFFFFFFFFFFFFFF:FFFFFFFFF:FFFFFFFFFFFFFFFF  
@A00155:342:HHGFNDSXY:1:2468:18285:16595 1:N:0:GAACCTAG+TCCGCATA  
ATCTCAATGCCGAGAGGGATGTAGAGGGCGAGAGAGAGCGACTTCTCTCGGGCCACAGCCTTACAGC  
TGTGGAGCACGGTATCCTCTGCCGAAACAGAGGTTGGACAAGACCGGAGGGGTCTCCTAGTTCCAAAG  
+  
FFFFFFFFFFFFF:FFFFFFFFF:FFF:FFFF:FFFF:F:FFFFFFFFFFFFFFFFFFFFFFFFFFFFFFFFFFFFF  
FFFFFFFFFFFFF:FFFFF:FFFFFFFFFFFF:FFFFF:FFF:FFFF,FFFFFFFFFFFFFFFFFFFFFFFFFFFFF  
@A00155:342:HHGFNDSXY:1:2468:16043:19883 1:N:0:GAACCTAG+TCCGCATA  
TACGACTTACACGGTAGGTCGTGAACAAGCCCGAGTACATCTCCTTTGGAAGTAGGAGACCCCTCCG  
GTCTTGTCCAACCTCTGTTTCGGCAGAGGATACCGTGCTCCACAGCTGTAAGGCTGTG  
+  
FFFFFFFFFFFFFFFFFFFFFFFFFFFFFFFFFFFFFFFFFFFFFFFFFFFFFFFFFFFFFFFFFFFFF  
FFFFFFFFFFFFFFFFFFFFFFFFFFFFFFFFFFFFFFFFFFFFFFFFFFFFFFFFFFFFFFFFFFFFF  
@A00155:342:HHGFNDSXY:1:2469:20428:8719 1:N:0:GAACCTAG+TCCGCATA  
GAGCGACTTCTCTCGGGCCACAGCCTTACAGCTGTGGAGCACGGTATCCTCTGCCGAAACAGAGGTT  
GGACAAGACCGGAGGGGTCTCCTAGTTCCAAAGGAGATGTACTCCGGGCTTGTTACGACCTACCGTG  
+  
FFFFFFFFFFFFFFFFFFFFFFFFFFFFFFFFFFFFFFFFFFFFFFFFFFFFFFFFFFFFFFFFFFFFF  
FFFFFFFFFFFFFFFFFFFFFFFFFFFFFFFFFFFFFFFFFFFFFFFFFFFFFFFFFFFFFFFFFFFFF  
@A00155:342:HHGFNDSXY:1:2469:31114:14544 1:N:0:GAACCTAG+TCCGCATA  
CAATGCCGAGAGGGATGTAGAGGGCGAGAGAGAGCGACTTCTCTCGGGCCACAGCCTTACAGCTGTG  
GAGCACGGTATCCTCTGCCGAAACAGAGGTTGGACAAGACCGGAGGGGTCTCCTAGTTCCAAAGGAGA  
+  
FFFFFFFFFFFFFFFFFFFF,FFFFFFFFFFFFFFFFFFFFFFFFFFFFFFFFFFFFFFFFFFFFFFFFFFFFF  
FFFFFFFFFFFFFFFFFFFFFFFFFFFFFFFFFFFFFFFFFFFFFFFFFFFFFFFFFFFFFFFFFFFFF  
@A00155:342:HHGFNDSXY:1:2469:14760:26303 1:N:0:GAACCTAG+TCCGCATA  
CCTCTGGCCTATGGTCATCTCAATGCCGAGAGGGATGTGGAGGGCGAGAGAGAGCGACTTCTCTCGGG  
CCACAGCCTTACAGCTGTGGAGCACGGTATCCTCTGCCGAAACAGAGGTTGGACAAGAC  
+  
:FFFFFFFFF:FF::FFF,,FFFF:,FFFF,FFF,,FFFF:FF:FFFFFFFFF:FFFFFFFF:FFFF:  
::FFFFFFFFFFFFFFFFFFFF:FFFFFFFFFFFFFFFFFFFF:FFFFFF:F,F,FFFFFFFFF:  
@A00155:342:HHGFNDSXY:1:2470:23204:1689 1:N:0:GAACCTAG+TCCGCATA  
GCGAGAGAGAGCGACTTCTCTCGGGCCACAGCCTTACAGCTGTGGAGCACGGTATCCTCTGCCGAAA  
CAGAGGTTGGACAAGACCGGAGGGGTCTCCTAGTTCCAAAGGAGATGTACTCCGGGCTTGTTACGAC  
+



FFFFFFFFFFFFFFFFFFFFFFFFFFFFFFFFFFFFFFFFFFFFFFFFFFFFFFFFFFFFFFFFFFFFFFFF  
FFFFFFFFFFFFFFFFFFFFFFFFFFFFFFFFFFFFFFFFFFFFFFFFFFFFFFFFFFFFFFFFFFFFFFFF  
@A00155:342:HHGFNDSXY:1:2470:2799:2206 1:N:0:GAACCTAG+TCCGCATA  
GGACAAGACCGGAGGGGTCTCCTAGTTCCAAAGGAGATGTACTCCGGGCTTGTTACGACCTACCGTG  
TAAGTCGTAGTCTAGTAGGCTACCTGACGAGTCCTTTTTAGGACGAACTTACACAACCTCAAAGAGTA  
+  
FFFFFFFFFFFFFFFFFFFFFFFFFFFFFFFFFFFFFFFFFFFFFFFFFFFFFFFFFFFFFFFFFFFFFFFF:FFFFFFFFFFFFFFFFFFFFFFFF  
FFFFFFFFFFFFFFFFFFFFFFFFFFFFFFFFFFFFFFFFFFFFFFFFFFFFFFFFFFFFFFFFFFFFFFFF:FFFFFFFFFFFFFFFFFFFFFFFF  
@A00155:342:HHGFNDSXY:1:2470:2582:3709 1:N:0:GAACCTAG+TCCGCATA  
AGGGATGTGGAGGGCGAGAGAGAGCGACTTCTCTCGGGCCACAGCCTTACAGCTGTGGAGCACGGTA  
TCCTCTGCCGAAACAGAGGTTGGACAAGACCGGAGGGGTCTCCTGGTTCCAAAGGAGATGTACTCCGG  
+  
FFFFFFFFFFFFFFFFFFFFFFFFFFFFFFFFFFFFFFFFFFFFFFFFFFFFFFFFFFFFFFFFFFFFFFFF:FFFFFFFFFFFFFFFFFFFFFFFF  
FFFFFFFFFFFFFFFFFFFFFFFFFFFFFFFFFFFFFFFFFFFFFFFFFFFFFFFFFFFFFFFFFFFFFFFF,FFFFFFFFFFFFFFFFFFFFFFFF  
@A00155:342:HHGFNDSXY:1:2470:28980:35744 1:N:0:GAACCTAG+TCCGCATA  
GGCATTGAGATGACCATAGGCCAGAGGTGAGTCCTTAAGTGGACACAGCTGATCTAAGGCGGTGTAGC  
GGGGCATGGGTTTGAACCCCATGACGGTCGGAGTCTAGTAGGCTCCTGATGAGTCCGTTCCAAGGA  
+  
FFFFFFFFFFFFFFFFFFFFFFFFFFFFFFFFFFFFFFFFFFFFFFFFFFFFFFFFFFFFFFFFFFFFFFFF,FFFFFFFFFFFFFFFFFFFFFFFF  
FFFFFFFFFFFFFFFFFFFFFFFFFFFFFFFFFFFFFFFFFFFFFFFFFFFFFFFFFFFFFFFFFFFFFFFFFFFFFFFFFFFFFFFFFFFFFFFF  
@A00155:342:HHGFNDSXY:1:2471:24415:8703 1:N:0:GAACCTAG+TCCGCATA  
TGCCCCGCCACACCGCCTTAGATCAGCTGTGTCCACTTAAGGACTCACCTCTGGCCTATGGTCATCTC  
AATGCCGAGAGGGATGTGGAGGGCGAGAGAGAGCGACTTCTCTCGGGCCACAGCCTTACAGCTGTGG  
+  
FFFFFFFFFFFFFFFFFFFFFFFFFFFFFFFFFFFFFFFFFFFFFFFFFFFFFFFFFFFFFFFFFFFFFFFF:FFFFFFFFFFFFFFFFFFFFFFFF  
FFFF:FFFFFFFFFFFFFFFFFFFFFFFFFFFFFFFFFFFFFFFFFFFFFFFFFFFFFFFFFFFFFFFFFFFFFFFFFFFFFFFFFFFFFFFF  
@A00155:342:HHGFNDSXY:1:2471:14109:9267 1:N:0:GAACCTAG+TCCGCATA  
AGCGACTTCTCTCGGGCCACAGCCTTACAGCTGTGGAGCACGGTATCCTCTGCCGAAACAGAGGTTG  
GACAAGACCGGAGGGGTCTCCTAGTTCCAAAGGAGATGTACTCCGGAATTGTTACGACCTACCGTGT  
+  
FFFFFFFFFFFFFFFFFFFFFFFFFFFFFFFFFFFFFFFFFFFFFFFFFFFFFFFFFFFFFFFFFFFFFFFFFFFFFFFFFFFFFFFFFFFFFFFF  
FFFFFFFFFFFFFFFFFFFFFFFFFFFFFFFFFFFFFFFFFFFFFFFFFFFFFFFFFFFFFFFFFFFFFFFFFFFFFFFFFFFFFFFFFFFFFFFF  
@A00155:342:HHGFNDSXY:1:2471:7265:20431 1:N:0:GAACCTAG+TCCGCATA  
CCTTACAGCTGTGGAGCACGGTATCCTCTGCCGAAACAGAGGTTGGACAAGACCGGAGGGGTCTCCTG  
GTTCCAAAGGAGATGTACTCCGGGCTTGTTACGACCTACCGTGTAAGTCGTAGTCTAGTAGGCTACC  
+  
FFFFFFFFFFFFFFFFFFFFFFFFFFFFFFFFFFFFFFFFFFFFFFFFFFFFFFFFFFFFFFFFFFFFFFFF:FFFFFFFFFFFFFFFF:FFFF  
FFFFFFFFFFFFFFFFFFFFFFFFFFFFFFFFFFFFFFFFFFFFFFFFFFFFFFFFFFFFFFFFFFFFFFFFFFFFFFFFFFFFFFFFFFFFFFFF  
@A00155:342:HHGFNDSXY:1:2471:18566:28447 1:N:0:GAACCTAG+TCCGCATA  
TGGAGGGCGAGAGAGAGCGACTTCTCTCGGGCCACAGCCTTACAGCTGTGGAGCACGGTATCCTCTG  
CCGAAACAGAGGTTGGACAAGACCGGAGGGGTCTCCTAGTTCCAAAGGAGATGTACTCCGGGCTTGTT  
+  
FFFFFFFFFFFFFFFFFFFFFFFFFFFFFFFFFFFFFFFFFFFFFFFFFFFFFFFFFFFFFFFFFFFFFFFFFFFFFFFFFFFFFFFFFFFFFFFF  
FFFFFFFFFFFFFFFFFFFFFFFFFFFFFFFFFFFFFFFFFFFFFFFFFFFFFFFFFFFFFFFFFFFFFFFF:FFFFFFFFFFFFFFFF  
@A00155:342:HHGFNDSXY:1:2471:2682:29653 1:N:0:GAACCTAG+TCCGCATA  
CTCAATGCCGAGAGGGATGTGGAGGGCGAGAGAGAGCGACTTCTCTCGGGCCACAGCCTTACAGCTG  
TGGAGCACGGTATCCTCTGCCGAAACAGAGGTTGGACAAGACCGGAGGGGTCTCCTAGTTCCAAAGGA  
+  
FFFFFFFFFFFFFFFFFFFFFFFF:FFFFFFF,FFFFFFFFFFFFFFFFFFFFFFFFFFFFFFFF, ,FFFFFFFFFFFFFFFFFFFFFFFF  
:FFFFFFFFFFFFFFFFFFFFFFFFFFFFFFFFFFFFFFFFFFFFFFFFFFFFFFFFFFFFFFFF:FFFFFFFFF:FFFFFFFF:FF  
@A00155:342:HHGFNDSXY:1:2471:1832:30749 1:N:0:GAACCTAG+TCCGCATA  
CTCAATGCCGAGAGGGATGTGGAGGGCGAGAGAGAGCGACTTCTCTCGGGCCACAGCCTTACAGCTG  
TGGAGCACGGTATCCTCTGCCGAAACAGAGGTTGGACAAGACCGGAGGGGTCTCCTAGTTCCAAAGGA  
+

FFFFFFFFFFFFFFFF:F,FFFFFFFFFFFF:FFFFFFFFFFFFFFFF:FFFFFFF,FFFFFF,F  
FFFFFF:FFFFFFFFFFFFFFFF:FFFFFFFFFFFFFFFF:FFFFFFFFFFFFFFFF,F,FFF,FFFF  
@A00155:342:HHGFNDSXY:1:2471:19859:32033 1:N:0:GAACCTAG+TCCGCATA  
CTATGGTCATCTCAATGCCGAGAGGGATGTGGAGGGCGAGAGAGCGACTTCTCTCGGGCCCACAGC  
CTTACAGCTGTGGAGCACGGTATCCTCTGCCGAAACAGAGGTTGGACAAGACCGGAGGGGTCTCCTAG  
+  
FFFFFFFFFFFFFFFFFFFFFFFFFFFFFFFFFFFFFFFFFFFFFFFFFFFFFFFFFFFFFFFFFFFFF  
FFFFFFFFFFFFFFFFFFFFFFFFFFFFFFFFFFFFFFFFFFFFFFFFFFFFFFFFFFFFFFFFFFFFF  
@A00155:342:HHGFNDSXY:1:2471:25925:32299 1:N:0:GAACCTAG+TCCGCATA  
TGCCGAGAGGGATGTGGAGGGCGAGAGAGAGCGACTTCTCTCGGGCCCACAGCCTTACAGCTGTGGAG  
CACGGTATCCTCTGCCGAAACAGAGGTTGGACAAGACCGGAGGGGTCTCCTAGTTCCAAAGGAGATGT  
+  
FFFFFFFFFFFFFFFFFFFFFFFFFFFFFFFFFFFFFFFFFFFFFFFFFFFFFFFFFFFFFFFFFFFFF  
FFFFFFFFFFFFFFFFFFFFFFFFFFFFFFFFFFFFFFFFFFFFFFFFFFFFFFFFFFFFFFFFFFFFF  
@A00155:342:HHGFNDSXY:1:2472:1841:13228 1:N:0:GAACCTAG+TCCGCATA  
GAGAGGGATGTGGAGGGCGAGAGAGAGCGACTTCTCTCGGGCCCACAGCCTTACAGCTGTGGAGCACG  
GTATCCTCTGCCGAAACAGAGGTTGGACAAGACCGGAGGGGTCTCCTAGTTCCAAAGGAG  
+  
FFFFFFF,F:FF:FFF:FFFFFFFF:FFF,FFFFFFFFFFFF:FFFFFFFFFFFFFFFF,FFFFF  
FF:FFFFFFFFFFFFFFFF:FFFFFFFFFFFF:,FFFFFF,FFFFFFFFFFFFFFFFFFFF,F  
@A00155:342:HHGFNDSXY:1:2472:15338:14904 1:N:0:GAACCTAG+TCCGCATA  
GAGCGACTTCTCTCGGGCCCACAGCCTTACAGCTGTGGAGCACGGTATCCTCTGCCGAAACAGAGGTT  
GGACAAGACCGGAGGGGTCTCCTAGTTCCAAAGAAGATGTACTCCGGGCTTGTTACGACCTACCGTG  
+  
FFFFFFFFFFFFFFFFFFFFFFFFFFFFFFFFFFFFFFFFFFFFFFFFFFFFFFFFFFFFFFFFFFFFF  
FFFFFFFFFFFFFFFFFFFFFFFFFFFFFFFFFFFFFFFFFFFFFFFFFFFFFFFFFFFFFFFFFFFFF  
@A00155:342:HHGFNDSXY:1:2472:15492:15358 1:N:0:GAACCTAG+TCCGCATA  
CTTCTCTCGGGCCCACAGCCTTACAGCTGTGGAGCACGGTATCCTCTGCCGAAACAGAGGTTGGACAA  
GACCGGAGGGGTCTCCTAGTTCCAAAGGAGATGTACTCCGGGCTTGTTACGACCTACCGTGTAAGTC  
+  
FFFFFFFFFFFFFFFFFFFFFFFFFFFFFFFFFFFFFFFFFFFFFFFFFFFFFFFFFFFFFFFFFFFF:FFFFFF  
FFFFFFFFFFFFFFFFFFFFFFFFFFFFFFFFFFFFFFFFFFFFFFFFFFFFFFFFFFFFFFFFFFFFF  
@A00155:342:HHGFNDSXY:1:2473:4309:10238 1:N:0:GAACCTAG+TCCGCATA  
CTTCTCTCGGGCCCACAGCCTTACAGCTGTGGAGCACGGTATCCTCTGCCGAAACAGAGGTTGGACAA  
GACCGGAGGGGTCTCCTAGTTCCAAAGGAGATGTACTCCGGGCTTGTTACGACCTACCGTGTAAGTC  
+  
FFFFFFFFFFFFFFFFFFFFFFFF:FFFFFFFFF:,FFF:FFF:FFFFFFFF:FFF:FFFFFFFFFFFFFFFF:  
FFFFFFFFF,F,:FFFFFF:FFFFFFFFFFFFFFFF:FFFFFFFFFFFF,FFFFFFFFFFFFFF:FFF  
@A00155:342:HHGFNDSXY:1:2473:28827:28401 1:N:0:GAACCTAG+TCCGCATA  
ACTTCTCTCGGGCCCACAGCCTTACAGCTGTGGAGCACGGTATCCTCTGCCGAAACAGAGGTTGGACA  
AGACCGGAGGGGTCTCCTAGTTCCAAAGGAGATGTACTCCGGGCTTGTTACGACCTACCGTGTAAGT  
+  
FFFFFFFFFFFFFFFFFFFFFFFFFFFFFFFFFFFFFFFFFFFFFFFFFFFFFFFFFFFFFFFFFFFFF  
FFFFFFFFFFFFFFFFFFFFFFFFFFFFFFFFFFFFFFFFFFFFFFFFFFFFFFFFFFFFFFFFFFFFF  
@A00155:342:HHGFNDSXY:1:2474:31620:10692 1:N:0:GAACCTAG+TCCGCATA  
GCGACTTCTCTCGGGCCCACAGCCTTACAGCTGTGGAGCACGGTATCCTCTGCCGAAACAGAGGTTGG  
ACAAGACCGGAGGGGTCTCCTAGTTCCAAAGGAGATGTACTCCGGGCTTGTTACGACCTACCGTGTA  
+  
FFFFFFFFFFFFFFFFFFFFFFFFFFFFFFFFFFFFFFFFFFFFFFFFFFFFFFFFFFFFFFFFFFFFF  
FFFFFFFFFFFFFFFFFFFFFFFFFFFFFFFFFFFFFFFFFFFFFFFFFFFFFFFFFFFFFFFFFFFFF  
@A00155:342:HHGFNDSXY:1:2474:8296:16203 1:N:0:GAACCTAG+TCCGCATA  
GGGCGAGAGAGAGCGACTTCTCTCGGGCCCACAGCCTTACAGCTGTGGAGCACGGTATCCTCTGCCGA  
AACAGAGGTTGGACAAGACCGGAGGGGTCTCCTAGTTCCAAAGGAGATGTACTCCGGGCTTGTTACG

```
FFFFFFFFFFF:FFFFFFFFFFFFFFFFFFFFFFFFFFFFFFFFFFFFFFFFFFFFFFFF  
FFFFFFFFFFFFFFFFFFFFFFFFFFFFFFFFFFFFFFFFFFFFFFFFFFFFFFFFFFFF:  
@A00155:342:HHGFNDSXY:1:2474:27832:33912 1:N:0:GAACCTAG+TCCGCATA  
CCATGCCCCGCCACACCGCCTTAGATCAGCTGTGTCCACTTAAGGACTCACCTCTGGCCTATGGTCAT  
CTCAATGCCGAGAGGGATGTGGAGGGCGAGAGAGAGCGACTTCTCTCGGGCCCACAGCCTTACAGCTG  
+  
FFFFFFFFFFFFFFFFFFFFFFFFFFFFFFFFFFFFFFFFFFFFFFFFFFFFFFFFFFFF:  
FFFFFFFFFFFFFFFFFFFFFFFFFFFFFFFFFFFFFFFFFFFFFFFFFFFFFFFFFFFF:  
@A00155:342:HHGFNDSXY:1:2475:14118:7028 1:N:0:GAACCTAG+TCCGCATA  
GATGTGGAGGGCGAGAGAGAGCGACTTCTCTCGGGCCCACAGCCTTACAGCTGTGGAGCACGGTATCO  
TCTGCCGAAACAGAGGTTTGACAAGACCGGAGGGGTCTCCTGGTTCAAAGGAGATGTACTCCGGGCT  
+  
FFFFFFFFFFFFFFFFFFFFFFFFFFFFFFFFFFFFFFFFFFFFFFFFFFFFFFFFFFFF:  
FFFFFFFFFFFFFFFFFFFFFFFFFFFFFFFFFFFFFFFFFFFFFFFFFFFFFFFFFFFF:  
@A00155:342:HHGFNDSXY:1:2475:23149:11083 1:N:0:GAACCTAG+TCCGCATA  
GTATCCTCTGCCGAAACAGAGGTTTGACAAGACCGGAGGGGTCTCCTAATTCAAAGGAGATGTACTC  
CGGGCTTGTTACGACCTACCGTGTAAGTCGTAGTCTAGTAGGCTACCTGACGAGTCCTTTTTAGGAC  
+  
FFFFFFFFFFFFFFFFFFFFFFFFFFFFFFFFFFFFFFFFFFFFFFFFFFFFFFFFFFFF:  
FFFFFFFFFFFFFFFFFFFFFFFFFFFFFFFFFFFFFFFFFFFFFFFFFFFFFFFFFFFF:  
@A00155:342:HHGFNDSXY:1:2475:5873:15013 1:N:0:GAACCTAG+TCCGCATA  
GACTTCTCTCGGGCCCACAGCCTTACAGCTGTGGAGCACGGTATCCTCTGCCGAAACAGAGGTTGGAC  
AAGACCGGAGGGGTCTCCTAGTTCAAAGGAGATGTACTCCGGGCTTGTTACGACCTACCGTGTAAG  
+  
FFFFFFFFFFFFFFFFFFFFFFFF:F:FF:FFFFFFFF:FFFF:FFFFFFFFFFFFFFFF:FF  
FFFFFFFFFFFFFFFFFFFFFFFF:FFFFFFFFFFFFFFFFFFFF,FFFF:FFFFFFFF:FF,F,F:FFF  
@A00155:342:HHGFNDSXY:1:2475:23213:15922 1:N:0:GAACCTAG+TCCGCATA  
CTTCTCTCGGGCCCACAGCCTTACAGCTGTGGAGCACGGTATCCTCTGCCGAAACAGAGGTTGGACAA  
GACCGGAGGGGTCTCCTAGTTCAAAGGAGATGTACTCCGGGCTTGTTACGACCTACCGTGTAAGTC  
+  
FFFFFFFFFFFFFFFFFFFFFFFFFFFFFFFFFFFFFFFFFFFFFFFFFFFFFFFFFFFF:  
FFFFFFFFFFFFFFFFFFFFFFFFFFFFFFFFFFFFFFFFFFFFFFFFFFFFFFFFFFFF:  
@A00155:342:HHGFNDSXY:1:2475:28601:15953 1:N:0:GAACCTAG+TCCGCATA  
AGATCAGCTGTGTCCACTTAAGGACTCACCTCTGGCCTATGGTCATCTCAATGCCGAGAGGGATGTGA  
AGGGCGAGAGAGAGCGACTTCTCTCGGGCCCACAGCCTTACAGCTGTGGAGCACGGTATCCTCTGCCG  
+  
FFFFFFFFFFFFFFFFFFFFFFFFFFFFFFFFFFFFFFFFFFFFFFFFFFFFFFFFFFFF:  
FFFFFFFFFFFFFFFFFFFFFFFFFFFFFFFFFFFFFFFFFFFFFFFFFFFFFFFFFFFF:  
@A00155:342:HHGFNDSXY:1:2475:12500:24518 1:N:0:GAACCTAG+TCCGCATA  
GACTTCTCTCGGGCCCACAGCCTTACAGCTGTGGAGCACGGTATCCTCTGCCGAAACAGAGGTTGGAC  
AAGACCGGAGGGGTCTCCTAGTTCAAAGGAGATGTACTCCGGGCTTGTTACGACCTACC  
+  
FFFFFFFFFFFFFFFFFFFFFFFFFFFFFFFFFFFFFFFFFFFFFFFFFFFFFFFFFFFF:  
FFFFFFFFFFFFFFFFFFFFFFFFFFFFFFFFFFFFFFFFFFFFFFFFFFFFFFFFFFFF:  
@A00155:342:HHGFNDSXY:1:2475:7789:26349 1:N:0:GAACCTAG+TCCGCATA  
TTCTCTCGGGCCCACAGCCTTACAGCTGTGGAGCACGGTATCCTCTGCCGAAACAGAGGTTGGACAAG  
ACCGGAGGGGTCTCCTAGTTCAAAGGAGATGTACTCCGGGCTTGTTACGACCTACCGTGTAAGTCG  
+  
FFFFFFFFFFFFFFFFFFFFFFFFFFFFFFFFFFFFFFFFFFFFFFFFFFFFFFFFFFFF:  
FFFFFFFFFFFFFFFFFFFFFFFFFFFFFFFFFFFFFFFFFFFFFFFFFFFFFFFFFFFF:  
@A00155:342:HHGFNDSXY:1:2475:12717:30436 1:N:0:GAACCTAG+TCCGCATA  
CTCGGGCCCACAGCCTTACAGCTGTGGAGCACGGTATCCTCTGCCGAAACAGAGGTTGGACAAGACCG  
GAGGGGTCTCCTAGTTCAAAGGAGATGTACTCCGGGCTTGTTACGACCTACCGTGTAAGTCGTAGT
```

FFFFFFFFFFFFFFFFFFFFFFFFFFFFFFFFFFFFFFFFFFFFFFFFFFFFFFFFFFFFFFFFFFFFFFFF  
FFFFFFFFFFFFFFFFFFFFFFFFFFFFFFFFFFFFFFFFFFFFFFFFFFFFFFFFFFFFFFFFFFFFFFFF  
@A00155:342:HHGFNDSXY:1:2476:9082:3505 1:N:0:GAACCTAG+TCCGCATA  
CTCAATGCCGAGAGGGATGTGGAGGGCGAGAGAGAGCGACTTCTCTCGGGCCCACAGCCTTACAGCTG  
TGGAGCACGGTATCCTCTGCCGAAACAGAGGTTGGACAAGACCGGAGGGGTCTCCTGGTTCCAAAGGA  
+  
FFFFFFFFFFFFFF:FFFFFFFFFFFFFFFFFFFFFFFFFFFFFFFFFFFFFFFFFFFFFFFFFFFFFFFF  
FFFFFFFFFFFFFFFFFFFFFFFFFFFFFFFFFFFFFFFFFFFFFFFFFFFFFFFFFFFFFFFFFFFFFFFF  
@A00155:342:HHGFNDSXY:1:2476:23484:7373 1:N:0:GAACCTAG+TCCGCATA  
CATCCCTCTCGGCATTGAGATGACCATAGGCCAGAGGTGAGTCCTTAAGTGGACACAGCTGATCTAAG  
GCGGTGTGGCGGGGCATGGGTTTGAACCCCATGACGGTCGGAGTCTAGTAGGCTCCCTGATGAGTCC  
+  
FFFFFFFFFFFFFF:FFFFFFFFFFFFFFFFFFFFFFFFFFFFFFFFFFFFFFFFFFFFFFFFFFFFFFFF  
FFFFFFFFFFFFFFFFFFFFFFFFFFFFFFFFFFFFFFFFFFFFFFFFFFFFFFFFFFFFFFFFFFFFFFFF  
@A00155:342:HHGFNDSXY:1:2476:26196:7373 1:N:0:GAACCTAG+TCCGCATA  
GGGCGAGAGAGAGCGACTTCTCTCGGGCCCACAGCCTTACAGCTGTGGAGCACGGTATCCTCTGCCGA  
AACAGAGGTTGGACAAGACCGGAGGGGTCTCCTAGTTCCAAAGGAGATGTACTCCGGGCTTGTTACG  
+  
FFFFFFFFFFFFFFFFFFFFFFFFFFFFFFFFFFFFFFFFFFFFFFFFFFFFFFFFFFFFFFFFFFFFFFFF  
FFFFFFFFFFFFFFFFFFFFFFFFFFFFFFFFFFFFFFFFFFFFFFFFFFFFFFFFFFFFFFFFFFFFFFFF  
@A00155:342:HHGFNDSXY:1:2476:26096:7670 1:N:0:GAACCTAG+TCCGCATA  
GGGCGAGAGAGAGCGACTTCTCTCGGGCCCACAGCCTTACAGCTGTGGAGCACGGTATCCTCTGCCGA  
AACAGAGGTTGGACAAGACCGGAGGGGTCTCCTAGTTCCAAAGGAGATGTACTCCGGGCTTGTTACG  
+  
FFFFFFFFFFFFFFFFFFFFFFFFFFFFFFFFFFFFFFFFFFFFFFFFFFFFFFFFFFFFFFFFFFFFFFFF  
FFFFFFFFFFFFFFFFFFFFFFFFFFFFFFFFFFFFFFFFFFFFFFFFFFFFFFFFFFFFFFFFFFFFFFFF  
@A00155:342:HHGFNDSXY:1:2476:22978:7811 1:N:0:GAACCTAG+TCCGCATA  
CATCCCTCTCGGCATTGAGATGACCATAGGCCAGAGGTGAGTCCTTAAGTGGACACAGCTGATCTAAG  
GCGGTGTGGCGGGGCATGGGTTTGAACCCCATGACGGTCGGAGTCTAGTAGGCTCCCTGATGAGTCC  
+  
FFFFFFFFFFFFFFFFFFFFFFFFFFFFFFFFFFFFFFFFFFFFFFFFFFFFFFFFFFFFFFFFFFFFFFFF  
FFFFFFFFFFFFFFFFFFFFFFFFFFFFFFFFFFFFFFFFFFFFFFFFFFFFFFFFFFFFFFFFFFFFFFFF  
@A00155:342:HHGFNDSXY:1:2476:21414:11428 1:N:0:GAACCTAG+TCCGCATA  
CATCCCTCTCGGCATTGAGATGACCATAGGCCAGAGGTGAGTCCTTAAGTGGACACAGCTGATCTAAG  
GCGGTGTGGCGGGGCATGGGTTTGAACCCCATGACGGTCGGAGTCTAGTAGGCTCCCTGATGAGTCC  
+  
F:FFFFFFFFFFFFFF:FFFFFFFFFFFFFFFFFFFFFFFFFFFFFFFFFFFFFFFFFFFFFFFFFFFFFF  
FFFFFFFFFFFFFFFFFFFFFFFFFFFFFFFFFFFFFFFFFFFFFFFFFFFFFFFFFFFFFFFFFFFFFFFF  
@A00155:342:HHGFNDSXY:1:2476:14696:16454 1:N:0:GAACCTAG+TCCGCATA  
ATCTCAATGCCGAGAGGGATGTGGAGGGCGAGAGAGAGCGACTTCTCTCGGGCCCACAGCCTTACAGC  
TGTGGAGCACGGTATCCTCTGCCGAAACAGAGGTTGGACAAGACCGGAGGGGTCTCCTAGTTCCAAAG  
+  
FFFFFFFFFFFFFFFFFFFFFFFFFFFFFFFFFFFFFFFFFFFFFFFFFFFFFFFFFFFFFFFFFFFFFFFF  
FFFFFFFFFFFFFFFFFFFFFFFFFFFFFFFFFFFFFFFFFFFFFFFFFFFFFFFFFFFFFFFFFFFFFFFF  
@A00155:342:HHGFNDSXY:1:2476:1045:31923 1:N:0:GAACCTAG+TCCGCATA  
TTCTCTCGGGCCCACAGCCTTACAGCTGTGGAGCACGGTATCCTCTGCCGAAACAGAGGTTGGACAAG  
ACCGGAGGGGTCTCCTAGTTCCAAAGGAGATGTACTCCGGGCTTGTTACGACCTACCGTGTAAGTCG  
+  
FFFFF:FFFFFF:FFFF:FF:FFFFFFFFFFFFFFFFFFFFFFFFFFFFFFFFFFFFFFFFFFFFFFFF  
:FFFFFFFFFFFFFFFFFFFFFFFFFFFFFFFFFFFFFFFFFFFFFFFFFFFFFFFFFFFFFFFFFFFFFFFF  
@A00155:342:HHGFNDSXY:1:2476:14705:35822 1:N:0:GAACCTAG+TCCGCATA  
GAGCGACTTCTCTCGGGCCCACAGCCTTACAGCTGTGGAGCACGGTATCCTCTGCCGAAACAGAGGTT  
GGACAAGACCGGAGGGGTCTCCTAGTTCCAAAGGAGATGTACTCCTGGCTTGTTACGACCTACCGTG  
+

FFFFFFFFFFFFFFFFFFFFFFFFFFFFFFFFFFFFFFFFFFFFFFFFFFFFFFFFFFFFFFFFFFFFFFFFFFFF  
FFFFFF:FFFFFFFFFFFFFFFF:FFFFFFFFFFFFFFFFFFFFFFFFFFFFFFFFFFFFFFFFFFFFFFFFFFFF  
@A00155:342:HHGFNDSXY:1:2477:10438:6449 1:N:0:GAACCTAG+TCCGCATA  
GAGAGAAGTCGCTCTCTCGCCCTCCACATCCCTCTCGGCATTGAGATGACCATAGGCCAGAGGTGA  
GTCCTTAAGTGGACACAGCTGATCTAAGGCGGTGTGGTGGGGCATGGGTTTGAACCCCCATGACGGTC  
+  
FFFFFFFFFFFFFFFFFFFFFFFFFFFFFFFFFFFFFFFFFFFFFFFFFFFFFFFFFFFFFFFFFFFFFFFFFFFF  
FFFFFFFFFFFFFFFFFFFFFFFF:FFFFFFFFFFFFFFFF:FFFFFFFFFFFFFFFFFFFFFFFFFFFFFFFF  
@A00155:342:HHGFNDSXY:1:2477:25780:18865 1:N:0:GAACCTAG+TCCGCATA  
GGGCGAGAGAGAGCGACTTCTCTCGGGCCACAGCCTTACAGCTGTGGAGCACGGTATCCTCTGCCGA  
AACAGAGGTTGGACAAGACCGGAGGGGTCTCCTAGTTCCAAAGGAGATGTACTCCGGGCTTGTTACG  
+  
FFFFFFFFFFFFFFFFFFFFFFFFFFFFFFFFFFFFFFFFFFFFFFFFFFFFFFFFFFFFFFFFFFFFFFFFFFFF  
FFFFFFFFFFFFFFFFFFFF:FFFFFFFFFFFFFFFFFFFFFFFFFFFFFFFFFFFFFFFFFFFFFFFFFFFF  
@A00155:342:HHGFNDSXY:1:2478:29740:9815 1:N:0:GAACCTAG+TCCGCATA  
GGATGTGGAGGGCGAGAGAGAGCGACTTCTCTCGGGCCACAGCCTTACAGCTGTGGAGCACGGTATC  
CTCTGCCGAAACAGAGGTTGGACAAGACCGGAGGGGTCTCCTAGTTCCAAAGGAGATGTACTCC  
+  
F:FFFFFFFFFFFFFFFFFFFFFFFFFFFFFFFF:FFFFFFF:FFFFFF:FFFFFFFFFFFFFFFFFFFF  
FFFFFFFFFFFFFFFFFFFF:,FFFFFFFFFFFFFFFFFFFFFFFFFFFFFFFFFFFFFFFFFFFFFFFFFFFF  
@A00155:342:HHGFNDSXY:1:2478:13114:10394 1:N:0:GAACCTAG+TCCGCATA  
CTTCTCTCGGGCCACAGCCTTACAGCTGTGGAGCACGGTATCCTCTGCCGAAACAGAGGTTGGACAA  
GACCGGAGGGGTCTCCTGGTTCCAAAGGAGATGTACTCCGGGCTTGTTACGACCTACCGTGTAAGTC  
+  
FFFFFFFFFFFFFFFFFFFFFFFFFFFFFFFFFFFFFFFFFFFFFFFFFFFFFFFFFFFFFFFFFFFFFFFFFFFF  
:FFFFFFFFFFFFFFFFFFFFFFFFFFFFFFFFFFFFFFFFFFFFFFFFFFFFFFFFFFFFFFFF:FFFFFFFFFFFFFFFFFFFF  
@A00155:342:HHGFNDSXY:1:2478:14199:17440 1:N:0:GAACCTAG+TCCGCATA  
AGACTCACCTCTGGCCTATGGTCATCTCAATGCCGAGAGGGATGTGGAGGGCGAGAGAGAGCGACTTC  
TCTCGGGCCACAGCCTTACAGCTGTGGAGCACGGTATCCTCTGCCGAAACAGAGGTTGGACAAGACC  
+  
FFFFFFFFFFFFFFFFFFFFFFFFFFFFFFFFFFFFFFFFFFFFFFFFFFFFFFFFFFFFFFFFFFFFFFFFFFFF  
FFFFFFFFFFFFFFFFFFFFFFFFFFFFFFFFFFFFFFFFFFFFFFFFFFFFFFFFFFFFFFFF:FFFFFFFFFFFFFFFFFFFF  
@A00155:342:HHGFNDSXY:1:2478:28637:19899 1:N:0:GAACCTAG+TCCGCATA  
GGATGTGGAGGGCGAGAGAGAGCGACTTCTCTCGGGCCACAGCCTTACAGCTGTGGAGCACGGTATC  
CTCTGCCGAAACAGAGGTTGGACAAGACCGGAGGGGTCTCCTAGTTCCAAAGGAGATGTACTCC  
+  
FFFFFFFFFFFFFFFFFFFFFFFFFFFFFFFF:FFFFFFFFFFFFFFFFFFFFFFFFFFFFFFFFFFFFFFFFFFFF  
FFFFFFFFFFFFFFFF:FFF:FFFFFFFF:FFFFFFFFFFFFFFFF:FFFFFFFFFFFFFFFFFFFF  
@A00155:342:HHGFNDSXY:1:2478:20292:23891 1:N:0:GAACCTAG+TCCGCATA  
CCTTACAGCTGTGGAGCACGGTATCCTCTGCCGAAACAGAGGTTGGACAAGACCGGAGGGGTCTCCCA  
GTTCCAAAGGAGATGTACTCCGGGCTTGTTACGACCTACCGTGTAAGTCGTAGTCTAGTAGGCTACC  
+  
FFFFFFFFFFFFFFFFFFFFFFFFFFFFFFFFFFFFFFFFFFFFFFFFFFFFFFFFFFFFFFFFFFFFFFFFFFFF  
FFFFFFFFFFFFFFFFFFFFFFFFFFFFFFFFFFFFFFFFFFFFFFFFFFFFFFFFFFFFFFFF:F,FFF:FFFF  
@A00155:342:HHGFNDSXY:1:2501:29170:13964 1:N:0:GAACCTAG+TCCGCATA  
TGTGGAGGGCGAGAGAGAGCGACTTCTCTCGGGCCACAGCCTTACAGCTGTGGAGCACGGTATCCTC  
TGCCGAAACAGAGGTTGGACAAGACCGGAGGGGTCTCCTAGTTCCAAAGGAGATGTACTCCGGG  
+  
FFFFFFF:F::FF:F:FF:FFFFFFFFFFFF:F:FFFF:F,F:F:FF:F,FF,FFFFFF:FFFF,F:  
FFFF:FFFF,FFF,FFFFFFFFFFFFFFFF:FFFFFF:FF,FFF,FF:F:FFFFFFFFFFFFFFFF:  
@A00155:342:HHGFNDSXY:1:2502:17752:5525 1:N:0:GAACCTAG+TCCGCATA  
ATCTCTATGCCGAGAGGGATGTGGAGGGCGAGAGAGAGCGACTTCTCTCGGGCCACAGCCTTACAGC  
TGTGGAGCACGGTATCCTCTGCCGAAACAGAGGTTGGACAAGACCGGAGGGGTCTCCTAG

FFFFFFFFFFFFFFFFFFFFFFFFFFFFFFFFFFFFFFFFFFFFFFFFFFFFFFFFFFFFFFFFFFFFFFFFFFFFFFFF  
FFFFFFFFFFFFFFFF,FFFFFFFFFFFFFFFFFFFFFFFFFFFFFFFFFFFFFFFFFFFFFFFFFFFFFFFFFFFFFFFF  
@A00155:342:HHGFNDSXY:1:2502:10890:9111 1:N:0:GAACCTAG+TCCGCATA  
ACTTCTCTCGGGCCCACAGCCTTACAGCTGTGGAGCACGGTATCCTCTGCCGAAACAGAGGTTGGACA  
AGACCGGAGGGGTCTCCTAGTTCCAAAGGAGATGTACTCCGGGCTTGTTACGACCTACCGTGTAAGT  
+  
FFFFFFFFFFFFFFFFFFFFFFFFFFFFFFFFFFFFFFFFFFFFFFFFFFFFFFFFFFFFFFFFFFFFFFFFFFFFFFFF  
FFFFFFFFFFFFFFFFFFFFFFFFFFFFFFFFFFFFFFFFFFFFFFFFFFFFFFFFFFFFFFFFFFFFFFFFFFFFFFFF  
@A00155:342:HHGFNDSXY:1:2502:8241:10285 1:N:0:GAACCTAG+TCCGCATA  
AGGGCGAGAGAGAGCGACTTCTCTCGGGCCCACAGCCTTACAGCTGTGGAGCACGGTATCCTCTGCCG  
AAACAGAGGTTGGACAAGACCGGAGGGGTCTCCTAGTTCCAAAGGAGATGTACTCCGGGCTTGTTAC  
+  
FFFFFFFFFFFFFFFFFFFFFFFFFFFFFFFFFFFFFFFFFFFFFFFFFFFFFFFFFFFFFFFFFFFFFFFFFFFFFFFF  
FFFFFFFFFFFFFFFFFFFFFFFFFFFFFFFFFFFFFFFFFFFFFFFFFFFFFFFFFFFFFFFFFFFFFFFFFFFFFFFF  
@A00155:342:HHGFNDSXY:1:2502:25870:14700 1:N:0:GAACCTAG+TCCGCATA  
GTCATCTCAATGCCGAGAGGAATGTGGAGGGCGAGAGAGAGCGACTTCTCTCGGGCCCACAGCCTTAC  
AGCTGTGGAGCACGGTATCCTCTGCCGAAACAGAGGTTGGACAAGACCGGAGGGGTCTCCTAGTTCCA  
+  
FFFFFFFFFFFFFFFFFFFFFFFF, :FFFFFFFFFFFFFFFFFFFFFFFFFFFFFFFFFFFFFFFFFFFFFFFF:FFF  
FFFFFFFFFFFFFFFFFFFFFFFFFFFFFFFFFFFFFFFFFFFFFFFFFFFFFFFFFFFFFFFFFFFFFFFF:FFFFFFF  
@A00155:342:HHGFNDSXY:1:2503:18846:8609 1:N:0:GAACCTAG+TCCGCATA  
GCTGTGTCCACTTAAGGACTCACCTCTGGCCTATGGTCATCTCAATGCCGAGAGGGATGTGAAGGGCG  
AGAGAGAGCGACTTCTCTCGGGCCCACAGCCTTACAGCTGTGGAGCACGGTATCCTCTGCCGAAACAG  
+  
FFFFFFFFFFFFFFFFFFFFFFFFFFFFFFFFFFFFFFFFFFFFFFFFFFFFFFFFFFFFFFFFFFFFFFFF:FFFFFFF  
FFFFFFFFFFFFFFFFFFFFFFFFFFFFFFFFFFFFFFFFFFFFFFFFFFFFFFFFFFFFFFFFFFFFFFFFFFFF  
@A00155:342:HHGFNDSXY:1:2503:28836:12289 1:N:0:GAACCTAG+TCCGCATA  
ATCTCAATGCCGAGAGGGATGTGGAGGGCGAGAGAGAGCGACTTCTCTCGGGCCCACAGCCTTACAGC  
TGTGGAGCACGGTATCCTCTGCCGAAACAGAGGTTGGACAAGACCGGAGGGGTCTCCTAGTTCCAAAG  
+  
FFFFFFFFFFFFFFFFFFFFFFFF:FFFFFFFFFFFFFFFFFFFFFFFFFFFFFFFF:FFFFFFFFFFFFFFFFFFFF  
FFFFFFFFFFFFFFFFFFFFFFFFFFFFFFFFFFFFFFFFFFFFFFFFFFFFFFFFFFFFFFFFFFFFFFFFFFFF  
@A00155:342:HHGFNDSXY:1:2503:30635:18850 1:N:0:GAACCTAG+TCCGCATA  
GTGTCCACTTAAGGACTCTCCTCTGGCCTATGGTCATCTCAATGCCGAGAGGGATGTGGAGGGCGAGA  
GAGAGCGACTTCTCTCGGGCCCACAGCCTTACAGCTGTGGAGCACGGTATCCTCTGCCGAAACAGAGG  
+  
FFFFFFFFFFFFFFFFFFFFFFFFFFFFFFFFFFFFFFFFFFFFFFFFFFFFFFFFFFFFFFFFFFFFFFFFFFFF  
FFFFFFFFFFFFFFFFFFFFFFFFFFFFFFFFFFFFFFFFFFFFFFFFFFFFFFFFFFFFFFFFFFFFFFFFFFFF  
@A00155:342:HHGFNDSXY:1:2503:20437:36730 1:N:0:GAACCTAG+TCCGCATA  
CTCAATGCCGAGAGGGATGTGGAGGGCGAGAGAGAGCGACTTCTCTCGGGCCCACAGCCTTACAGCTG  
TGGAGCACGGTATCCTCTGCCGAAACAGAGGTTGGACAAGACCGGAGGGGTCTCCTGGTTCCAAAGGA  
+  
FFFFFFFFFFFFFFFFFFFFFFFF:FFFFFFFFFFFFFFFFFFFFFFFF:FFFFFFFFFFFFFFFFFFFFFFFF  
FFFFFFFFFFFFFFFFFFFFFFFFFFFFFFFFFFFFFFFF:FFFFFFFFFFFFFFFFFFFFFFFFFFFFFFFF:FFF  
@A00155:342:HHGFNDSXY:1:2504:20030:13166 1:N:0:GAACCTAG+TCCGCATA  
ATCTCAATGCCGAGAGGGATGTAGAGGGCGAGAGAGAGCGACTTCTCTCGGGCCCACAGCCTTACAGC  
TGTGGAGCACGGTATCCTCTGCCGAAACAGAGGTTGGACAAGACCGGAGGGGTCTCCTAGTTCCAAAG  
+  
FFFFFFFFFFFFFFFFFFFFFFFF:FFFFFFFFFFFFFFFFFFFFFFFFFFFFFFFFFFFFFFFF:FFFF  
FFFFFFFFFFFFFFFFFFFFFFFFFFFFFFFFFFFFFFFFFFFFFFFFFFFFFFFFFFFFFFFFFFFFFFFF, FFFFFFFF  
@A00155:342:HHGFNDSXY:1:2504:18059:16517 1:N:0:GAACCTAG+TCCGCATA  
AGCTGTGGAGCACGGTATCCTCTGCCGAAACAGAGGTTGGACAAGACCGGAGGGGTCTCCTAGTTCCA  
AAGGAGATGTACTCCGGGCTTGTTACGACCTACCGTGTAAGTCGTAGTCTAGTAGGCTACCTGACGA  
+

FFFFFFFFFFFFFFFFFFFFFFFFFFFFFFFFFFFFFFFFFFFFFFFFFFFFFFFFFFFFFFFFFFFFFFFF  
FFFFFFFFFFFFFFFFFFFFFFFFFFFFFFFFFFFFFFFFFFFFFFFFFFFFFFFFFFFFFFFFFFFFFFFF  
@A00155:342:HHGFNDSXY:1:2504:23439:19758 1:N:0:GAACCTAG+TCCGCATA  
GAGAGAGCGACTTCTCTCGGGCCCACAGCCTTACAGCTGTGGAGCACGGTATCCTCTGCCGAAACAGA  
GGTTGGACAAGACCGGAGGGGTCTCCTAGTTCCAAAGGAGATGTACTCCGGGCTTGTTCACGACCTA  
+  
FFFFFFFF:F:FFFFFFFFFFFFFFFFFFFFFFFFFFFFFFFFFFFFFFFFFFFFFFFFFFFFFFFFFFFF  
FFFFFFFFFFFFFFFFFFFFFFFFFFFFFFFFFFFFFFFFFFFFFFFFFFFFFFFFFFFFFFFFFFFFFFFF  
@A00155:342:HHGFNDSXY:1:2504:17942:35070 1:N:0:GAACCTAG+TCCGCATA  
GCGACTTCTCTCGGGCCCACAGCCTTACAGCTGTGGAGCACGGTATCCTCTGCCGAAACAGAGGTTGG  
ACAAGACCGGAGGGGTCTCCTAGTTCCAAAGGAGATGTACTCCGGGCTTGTTCACGACCTACCGTGTA  
+  
FFFFFFFFFFFFFFFFFFFFFFFFFFFFFFFFFFFFFFFFFFFFFFFFFFFFFFFFFFFFFFFFFFFFFFFF  
FFFFFFFFFFFFFFFFFFFFFFFFFFFFFFFFFFFFFFFFFFFFFFFFFFFFFFFFFFFFFFFFFFFFFFFF  
@A00155:342:HHGFNDSXY:1:2505:21676:6590 1:N:0:GAACCTAG+TCCGCATA  
TGTTTTCGGCAGAGGATACCGTGCTCCACAGCTGTAAGGCTGTGGGCCCAGAGAGAAGTCGCTCTCTCTC  
GCCCTCCACATCCCTCTCGGCATTGAGATGACCATAGGCCAGAGGTGAGTCCTTAAGTGACACAGCT  
+  
FFFFFFFFFFFFFFFFFFFFFFFFFFFFFFFFFFFFFFFFFFFFFFFFFFFFFFFFFFFFFFFFFFFFFFFF  
FFFFFFFFFFFFFFFFFFFFFFFFFFFFFFFFFFFFFFFFFFFFFFFFFFFFFFFFFFFFFFFFFFFFFFFF  
@A00155:342:HHGFNDSXY:1:2505:5113:16642 1:N:0:GAACCTAG+TCCGCATA  
GGATGTGGAGGGCGAGAGAGAGCGACTTCTCTCGGGCCCACAGCCTTACAGCTGTGGAGCACGGTATC  
CTCTGCCGAAACAGAGGTTGGACAAGACCGGAGGGGTCTCCTAGTTCCAAAGGAGATGTACTCC  
+  
FFFFF:FFFFFFFFFFFFFFFFFFFFFFFFFFFFFFFFFFFFFFFFFFFFFFFFFFFFFFFFFFFFFFFF  
FFFFFFFFFFFFFFFFFFFFFFFFFFFFFFFFFFFFFFFFFFFFFFFFFFFFFFFFFFFFFFFFFFFFFFFF  
@A00155:342:HHGFNDSXY:1:2505:31096:35556 1:N:0:GAACCTAG+TCCGCATA  
CTCTGCCGAAACAGAGGTTGGACAAGACCGGAGGGGTCTCCTAGTTCCAAAGGAGATGTACTCCGGGC  
TTGTTACGACCTACCGTGTAAGTCGTAGTCTAGTAGGCTACCTGACGAGTCCTTTTTAGGACGAAAC  
+  
FFFFFFFFFFFFFFFFFFFFFFFFFFFFFFFFFFFFFFFFFFFFFFFFFFFFFFFFFFFFFFFFFFFFFFFF  
FFFFFFFFFFFFFFFFFFFFFFFFFFFFFFFFFFFFFFFFFFFFFFFFFFFFFFFFFFFFFFFFFFFFFFFF  
@A00155:342:HHGFNDSXY:1:2506:24198:13056 1:N:0:GAACCTAG+TCCGCATA  
GTAAGGCTGTGGGCCCCAGAGAGAAGTCGCTCTCTCTCGCCCTCCACATCCCTCTCGGCATTGAGATGAC  
CATAGGCCAGAGGTGAGTCCTTAAGTGACACAGCTGATCTAAGGCGGTGTGGCGGGGCATGGGTTTG  
+  
:FF::FFFFFFF,:FF:FF::FF:FFFFFF:F:FFFFFF:FFFFFFFFFFFFFFFF:F,F:,FFFF,FFF  
:FFFF:FFFFFFFF:FFFF::F,,FFFFFFFFFF:FF,FFFFFFFF:FF:FFF::FFF,,FF,:FF  
@A00155:342:HHGFNDSXY:1:2506:13458:15436 1:N:0:GAACCTAG+TCCGCATA  
GAGAGGGATGTGGAGGGCGAGAGAGAGCGACTTCTCTCGGGCCCACAGCCTTACAGCTGTGGAGCACG  
GTATCCTCTGCCGAAACAGAGGTTGGACAAGACCGGAGGGGTCTCCTGGTTCCAAAGGAGATGTACTC  
+  
FFFFFFFFFFFFFFFFFFFFFFFFFFFFFFFFFFFFFFFFFFFFFFFFFFFFFFFFFFFFFFFFFFFFFFFF  
FFFFFFFFFFFFFFFFFFFFFFFFFFFFFFFFFFFFFFFFFFFFFFFFFFFFFFFFFFFFFFFFFFFFFFFF  
@A00155:342:HHGFNDSXY:1:2506:17372:16391 1:N:0:GAACCTAG+TCCGCATA  
CTTCTCTCGGGCCCACAGCCTTACAAGTGTGGAGCACGGTATCCTCTGCCGAAACAGAGGTTGGACAA  
GACCGGAGGGGTCTCCTAGTTCCAAAGGAGATGTACTCCGGGCTTGTTCACGACCTACCGTGTAAG  
+  
FFFFFFFFFFFFFFFFFFFFFFFFFFFFFFFFFFFFFFFFFFFFFFFFFFFFFFFFFFFFFFFFFFFFFFFF  
FFFFFFFFFFFFFFFFFFFFFFFFFFFFFFFFFFFFFFFFFFFFFFFFFFFFFFFFFFFFFFFFFFFFFFFF  
@A00155:342:HHGFNDSXY:1:2506:10348:25739 1:N:0:GAACCTAG+TCCGCATA  
ATCCTCTGCCGAAACAGAGGTTGGACAAGACCGGAGGGGTCTCCTAGTTCCAAAGGAGATGTATTCCG  
GGCTTGTTCACGACCTACCGTGTAAGTCGTAGTCTAGTAGGCTACCTGACGAGTCCTTTTTAGGACGA  
+

FFFFFFFFFFFFFFFFFFFFFFFFFFFFFFFFFFFFFFFFFFFFFFFFFFFFFFFFFFFFFFFFFFFFFFFF  
FFFFFFFFFFFFFFFFFFFFFFFFFFFFFFFFFFFFFFFFFFFFFFFFFFFFFFFFFFFFFFFFFFFFFFFF  
@A00155:342:HHGFNDSXY:1:2506:11749:27602 1:N:0:GAACCTAG+TCCGCATA  
CTCAATGCCGAGAGGGATGTGGAGGGCGAGAGAGAGCGACTTCTCTCGGGCCCACAGCCTTACAGCTG  
TGGAGCACGGTATCCTCTGCCGAAACAGAGGTTGGACAAGACCGGAGGGGTCTCCTAGTTCCAAAGGA  
+  
FFFFFFFFFFFFFFFFFFFFFFFFFFFFFFFFFFFFFFFFFFFFFFFFFFFFFFFFFFFFFFFFFFFFFFFF  
FFFFFFFFFFFFFFFFFFFFFFFFFFFFFFFFFFFFFFFFFFFFFFFFFFFFFFFFFFFFFFFFFFFFFFFF  
@A00155:342:HHGFNDSXY:1:2507:4435:2440 1:N:0:GAACCTAG+TCCGCATA  
GGGCGAGAGAGAGCGACTTCTCTCGGGCCCACAGCCTTACAGCTGTGGAGCACGGTATCCTCTGCCGA  
AACAGAGGTTGGACAAGACCGGAGGGGTCTCCTAGTTCCAAAGGAGATGTACTCCGGGCTTGTTACAG  
+  
F::FFFFF:FFFFFFFFFFFFFFFFFFFFFFFFFFFFFFFFFFFFFFFFFFFFFFFFFFFFFFFFFFFFF  
FFFFFFFFFFFFFFFFFFFFFFFF:FF:FFFFFFFFFFFFFFFFFFFFFFFFFFFFFFFFFFFFFFFFFFFF  
@A00155:342:HHGFNDSXY:1:2507:16812:14888 1:N:0:GAACCTAG+TCCGCATA  
GGATGTAGAGGGCGAGAGAGAGCGACTTCTCTCGGGCCCACAGCCTTACAGCTGTGGAGCACGGTATC  
CTCTGCCGAAACAGAGGTTGGACAAGACCGGAGGGGTCTCCTAGTTCCAAAGGAGATGTACTCC  
+  
FFF:FFFFF:F:FFFFFFFFFFFFFFFFFFFFFFFFFFFFFFFFFFFFFFFFFFFFFFFFFFFFF,FFFF:FFFFFFFFFFFFFFFF  
FFFFFFFFFFFFFFFFFFFFFFFFFFFFFFFFFFFFFFFFFFFFFFFFFFFFFFFFFFFFFFFFFFFFFFFF  
@A00155:342:HHGFNDSXY:1:2507:9236:30420 1:N:0:GAACCTAG+TCCGCATA  
GGATGTGGAGGGCGAGAGAGAGCGACTTCTCTCGGGCCCACAGCCTTACAGCTGTGGAGCACGGTATC  
CTCTGCCGAAACAGAGGTTGGACAAGACCGGAGGGGTCTCCTAGTTCCAAAGGAGATGTACTCC  
+  
FFFFFFFFFFFFFFFFFFFFFFFFFFFFFFFFFFFFFFFFFFFFFFFFFFFFFFFFFFFFFFFFFFFFFFFF  
FFFFFFFFFFFFFFFFFFFFFFFFFFFFFFFFFFFFFFFFFFFFFFFFFFFFFFFFFFFFFFFFFFFFFFFF  
@A00155:342:HHGFNDSXY:1:2508:26648:14043 1:N:0:GAACCTAG+TCCGCATA  
TAGGTCGTGAACAAGCCCGAGTACATCTCCTTTGGAACCAGGAGACCCCTCCGGTCTTGTCCAACCT  
CTGTTTCGGCAGAGGATACCGTGCTCCACAGCTGTAAGGCTGTGGGCCCCGAGAGAAGTCGCTCTCTCT  
+  
FFFFFFFFF:F:F:FFFFFFFFFFFFFFFFFFFFFFFFFFFFFFFFFFFFFFFFFFFFFFFFFFFFFFFF  
FFFFFFFFFFFFFFFFFFFFFFFFFFFFFFFFFFFFFFFFFFFFFFFFFFFFFFFFFFFFFFFFFFFFFFFF  
@A00155:342:HHGFNDSXY:1:2509:25337:31688 1:N:0:GAACCTAG+TCCGCATA  
CCATGCCCCGCCACACCGCCTTAGATCAGCTGTGTCCACTTAAGGACTCACCTCTGGCCTATGGTCAT  
CTCAATGCCGAGAGGGATGTGGAGGGCGAGAGAGAGCGACTTCTCTCGGGCCCACAGCCTTACAGCTG  
+  
FFFFFFFFFFFFFFFFFFFFFFFFFFFFFFFFFFFFFFFFFFFFFFFFFFFFFFFFFFFFFFFFFFFFFFFF  
FFFFFFFFFFFFFFFFFFFFFFFFFFFFFFFFFFFFFFFFFFFFFFFFFFFFFFFFFFFFFFFFFFFFFFFF  
@A00155:342:HHGFNDSXY:1:2510:24099:8938 1:N:0:GAACCTAG+TCCGCATA  
TGTCCACTTAAGGACTCACCTCTGGCCTATGGTCATCTCAATGCCGAGAGGGATGTGAAGGGCGAGAG  
AGAGCGACTTCTCTCGGGCCCACAGCCTTACAGCTGTGGAGCACGGTATCCTCTGCCGAAACAGAGGT  
+  
FFFFFFFFFFFFFFFFFFFFFFFFFFFFFFFFFFFFFFFFFFFFFFFFFFFFFFFFFFFFFFFFFFFFFFFF  
FFFFFFFFFFFFFFFFFFFFFFFFFFFFFFFFFFFFFFFFFFFFFFFFFFFFFFFFFFFFFFFFFFFFFFFF  
@A00155:342:HHGFNDSXY:1:2510:2844:12023 1:N:0:GAACCTAG+TCCGCATA  
GGCGAGAGAGAGCGACTTCTCTCGGGCCCACAGCCTTACAGCTGTGGAGCACGGTATCCTCTGCCGAA  
ACAGAGGTTGGACAAGACCGGAGGGGTCTCCTAGTTCCAAAGGAGATGTACTCCGGGCTTGTTACGA  
+  
FFFFFFFFFFFFFFFFFFFFFFFFFFFFFFFFFFFFFFFFFFFFFFFFFFFFFFFFFFFFFFFFFFFFFFFF  
FFFFFFFFFFFFFFFFFFFFFFFFFFFFFFFFFFFFFFFFFFFFFFFFFFFFFFFFFFFFFFFFFFFFFFFF  
@A00155:342:HHGFNDSXY:1:2510:26413:13072 1:N:0:GAACCTAG+TCCGCATA  
GGGCGAGAGAGAGCGACTTCTCTCGGGCCCACAGCCTTACAGCTGTGGAGCACGGTATCCTCTGCCGA  
AACAGAGGTTGGACAAGACCGGAGGGGTCTCCTGTTCCAAAGGAGATGTACTCCGGGCTTGTTACAG  
+



FFFFFFFFFFFFFFFFFFFFFFFFFFFFFFFFFFFFFFFFFFFFFFFFFFFFFFFFFFFFFFFFFFFFFFFF  
FFFFFFFFFFFFFFFFFFFFFFFFFFFFFFFFFFFFFFFFFFFFFFFFFFFFFFFFFFFFFFFFFFFFFFFF  
@A00155:342:HHGFNDSXY:1:2510:14425:17300 1:N:0:GAACCTAG+TCCGCATA  
AGAGAGAGCGACTTCTCTCGGGCCACAGCCTTACAGCTGTGGAGCACGGTATCCTCTGCCGAAACAG  
AGGTTGGACAAGACCGGAGGGGTCTCCTAGTTCCAAAGGAGATGTACTCCGGGCTTGTTACGACCTA  
+  
FFFFFFFFFFFFFFFFFFFFFFFFFFFFFFFFFFFFFFFFFFFFFFFFFFFFFFFFFFFFFFFFFFFFFFFF  
FFFFFFFFFFFFFFFFFFFFFFFFFFFFFFFFFFFFFFFFFFFFFFFFFFFFFFFFFFFFFFFFFFFFFFFF  
@A00155:342:HHGFNDSXY:1:2510:29017:35994 1:N:0:GAACCTAG+TCCGCATA  
GAGGGCGAGAGAGAGCGACTTCTCTCGGGCCACAGCCTTACAGCTGTGGAGCACGGTATCCTCTGCC  
GAAACAGAGGTTGGACAAGACCGGAGGGGTCTCCTAGTTCCAAAGGAGATGTACTCCGGGCTTGTTCA  
+  
FFFFFFFFFFFFFFFFFFFFFFFFFFFFFFFFFFFFFFFFFFFFFFFFFFFFFFFFFFFFFFFFFFFFFFFF  
FFFFFFFFFFFFFFFFFFFFFFFFFFFFFFFFFFFFFFFFFFFFFFFFFFFFFFFFFFFFFFFFFFFFFFFF  
@A00155:342:HHGFNDSXY:1:2511:29071:5243 1:N:0:GAACCTAG+TCCGCATA  
AGCGACTTCTCTCGGGCCACAGCCTTACAGCTGTGGAGCACGGTATCCTCTGCCGAAACAGAGGTTG  
GACAAGACCGGAGGGGTCTCCTAGTTCCAAAGGAGATGTACTCCGGGCTTGTTACGACCTACCGTGT  
+  
FFFFFFFFFFFFFFFFFFFFFFFFFFFFFFFFFFFFFFFFFFFFFFFFFFFFFFFFFFFFFFFFFFFFFFFF  
FFFFFFFFFFFFFFFFFFFFFFFFFFFFFFFFFFFFFFFFFFFFFFFFFFFFFFFFFFFFFFFFFFFFFFFF  
@A00155:342:HHGFNDSXY:1:2511:29062:24424 1:N:0:GAACCTAG+TCCGCATA  
CTTCTCTCGGGCCACAGCCTTACAGCTGTGGAGCACGGTATCCTCTGCCGAAACAGAGGTTGGACAA  
GACCGGAGGGGTCTCCTAGTTCCAAAGGAGATGTACTCCGGGCTTGTTACGACCTACCGTGTAAGTC  
+  
FFFFFFFFFFFFFFFFFFFFFFFFFFFFFFFFFFFFFFFFFFFFFFFFFFFFFFFFFFFFFFFFFFFFFFFF  
FFFFFFFFFFFFFFFFFFFFFFFFFFFFFFFFFFFFFFFFFFFFFFFFFFFFFFFFFFFFFFFFFFFFFFFF  
@A00155:342:HHGFNDSXY:1:2511:4481:29230 1:N:0:GAACCTAG+TCCGCATA  
CTTCTCTCGGGCCACAGCCTTACAGCTGTGGAGCACGGTATCCTCTGCCGAAACAGAGGTTGGACAA  
GACCGGAGGGGTCTCCTGGTTCCAAAGGAGATGTACTCCGGGCTTGTTACGACCTACCGTGTAAGTC  
+  
FFFFFFFFFFFFFFFFFFFFFFFFFFFFFFFFFFFFFFFFFFFFFFFFFFFFFFFFFFFFFFFFFFFFFFFF  
FFFFFFFFFFFFFFFFFFFFFFFFFFFFFFFFFFFFFFFFFFFFFFFFFFFFFFFFFFFFFFFFFFFFFFFF  
@A00155:342:HHGFNDSXY:1:2511:31186:30859 1:N:0:GAACCTAG+TCCGCATA  
ATCTCAATGCCGAGAGGGATGTAGAGGGCGAGAGAGAGCGACTTCTCTCGGGCCACAGCCTTACAGC  
TGTGGAGCACGGTATCCTCTGCCGAAACAGAGGTTGGACAAGACCGGAGGGGTCTCCTAGTTCCAAAG  
+  
FFFFFFFFFFFFFFFFFFFFFFFFFFFFFFFFFFFFFFFFFFFFFFFFFFFFFFFFFFFFFFFFFFFFFFFF  
FFFFFFFFFFFFFFFFFFFFFFFFFFFFFFFFFFFFFFFFFFFFFFFFFFFFFFFFFFFFFFFFFFFFFFFF  
@A00155:342:HHGFNDSXY:1:2511:19840:33411 1:N:0:GAACCTAG+TCCGCATA  
TGGTCATCTCAATGCCGAGAGGGATGTAGAGGGCGAGAGAGAGCGACTTCTCTCGGGCCACAGCCTT  
ACAGCTGTGGAGCACGGTATCCTCTGCCGAAACAGAGGTTGGACAAGACCGGAGGGGTCTCCTAGTTC  
+  
FFFFFFFFFFFFFFFFFFFFFFFFFFFFFFFFFFFFFFFFFFFFFFFFFFFFFFFFFFFFFFFFFFFFFFFF  
FFFFFFFFFFFFFFFFFFFFFFFFFFFFFFFFFFFFFFFFFFFFFFFFFFFFFFFFFFFFFFFFFFFFFFFF  
@A00155:342:HHGFNDSXY:1:2512:30807:11005 1:N:0:GAACCTAG+TCCGCATA  
CTTCTCTCGGGCCACAGCCTTACAGCTGTGGAGCACGGTATCCTCTGCCGAAACAGAGGTTGGACAA  
GACCGGAGGGGTCTCCTAGTTCCAAAGGAGATGTACTCCGGGCTTGTTACGACCTACCGTGTAAGTC  
+  
FFFFFFFFFFFFFFFFFFFFFFFFFFFFFFFFFFFFFFFFFFFFFFFFFFFFFFFFFFFFFFFFFFFFFFFF  
FFFFFFFFFFFFFFFFFFFFFFFFFFFFFFFFFFFFFFFFFFFFFFFFFFFFFFFFFFFFFFFFFFFFFFFF  
@A00155:342:HHGFNDSXY:1:2512:17580:25269 1:N:0:GAACCTAG+TCCGCATA  
AGAGAGAGCGACTTCTCTCGGGCCACAGCCTTACAGCTGTGGAGCACGGTATCCTCTGCCGAAACAG  
AGGTTGGACAAGACCGGAGGGGTCTCCTGGTTCCAAAGGAGATGTACTCCGGGCTTGTTACGACCTA  
+

FFFFFFFFFFFFFFFFFFFFFFFFFFFFFFFFFFFFFFFFFFFFFFFFFFFFFFFFFFFFFFFFFFFFFFFF  
FFFFFFFFFFFFFFFFFFFFFFFFFFFFFFFFFFFFFFFFFFFFFFFFFFFFFFFFFFFFFFFFFFFFFFFF:FFFFFFF  
@A00155:342:HHGFNDSXY:1:2512:18376:25645 1:N:0:GAACCTAG+TCCGCATA  
AGAGAGAGCGACTTCTCTCGGGCCACAGCCTTACAGCTGTGGAGCACGGTATCCTCTGCCGAAACAG  
AGGTTGGACAAGACCGGAGGGGTCTCCTGGTTCCAAAGGAGATGTACTCCGGGCTTGTTACGACCTA  
+  
FFFFFFFFFFFFFFFFFFFFFFFFFFFFFFFFFFFFFFFFFFFFFFFFFFFFFFFFFFFFFFFFFFFFFFFF:FF:FFFFFFFFFFFF  
FFFFFFFFFFFFFFFFFFFFFFFFFFFFFFFFFFFFFFFFFFFFFFFFFFFFFFFFFFFFFFFFFFFFFFFF:FFFFFFFFFFFFF:  
@A00155:342:HHGFNDSXY:1:2512:11749:30639 1:N:0:GAACCTAG+TCCGCATA  
TTCTCTCGGGCCACAGCCTTACAGCTGTGGAGCACGGTATCCTCTGCCGAAACAGAGGTTGGACAAG  
ACCGGAGGGGTCTCCTAGTTCCAAAGGAGATGTACTCCGGGCTTGTTACGACCTACCGTGTAAGT  
+  
F:FFFFF:FFFFFFFFFFFF:FF,F:FF,FFFF,FFF,FFFF,F,F,FFFFF:FFFFFFFFF:FFFF  
FFF,FFF,FF:F:FFFFF,FFFFF:F:FF,:FFFFFFFFF,:FFF:,FFFFF,,FFF,F:F  
@A00155:342:HHGFNDSXY:1:2513:14281:20713 1:N:0:GAACCTAG+TCCGCATA  
TTCTCTCGGGCCACAGCCTTACAGCTGTGGAGCACGGTATCCTCTGCCGAAACAGAGGTTGGACAAG  
ACCGGAGGGGTCTCCTGGTTCCAAAGGAGATGTACTCCGGGCTTGTTACGACCTACCGTGTAAGTCG  
+  
FFFFFFFFFFFFFFFFFFFFFFFFFFFFFFFFFFFFFFFFFFFFFFFFFFFFFFFFFFFFFFFFFFFFFFFF:FFFFFFFFFFFFFFFFFFFFFFFFFFFFFFFFFFFFF,  
FFFFFFFFFFFFFFFFFFFFFFFFFFFFFFFFFFFFFFFFFFFFFFFFFFFFFFFFFFFFFFFFFFFFFFFF:FFFFFFFFFFFFFFFFFFFFFFFFFFFFFFFFFFFFF  
@A00155:342:HHGFNDSXY:1:2513:17951:24878 1:N:0:GAACCTAG+TCCGCATA  
GTCATCTCAATGCCGAGAGGGATGTGGAGGGCGAGAGAGAGCGACTTCTCTCGGGCCACAGCCTTAC  
AGCTGTGGAGCACGGTATCCTCTGCCGAAACAGAGGTTGGACAAGACCGGAGGGGTCTCCTAGTTCCA  
+  
FFFFFFFFFFFFFFFFFFFFFFFFFFFFFFFFFFFFFFFFFFFFFFFFFFFFFFFFFFFFFFFFFFFFFFFF:FFFFFFFFFFFFFFFFFFFFFFFFFFFFFFFFFFFFF  
FFFFFFFFFFFFFFFFFFFFFFFFFFFFFFFFFFFFFFFFFFFFFFFFFFFFFFFFFFFFFFFFFFFFFFFF:FFFFFFFFFFFFFFFFFFFFFFFFFFFFFFFFFFFFF  
@A00155:342:HHGFNDSXY:1:2513:1832:26021 1:N:0:GAACCTAG+TCCGCATA  
TGCCGAGAGGGATGTGGAGGGCGAGAGAGAGCGACTTCTCTCGGGCCACAGCCTTACAGCTGTGGAG  
CACGGTATCCTCTGCCGAAACAGAGGTTGGACAAGACCGGAGGGGTCTCCTAGTTCCAAAGGAGATGT  
+  
FFFFF:FFFFF,F:FFFFFFFFFFFFFFFFFFFFFFFFFFFFFFFFFFFFFFFFFFFFFFFFFFFFFFFFFFFFFFFFFFFFFFFFFFFFFFFFFFFFFFFFFFFFF  
FFFFFFFF:FFFFFFFFFFFFF:FFFFF:FFFFF::F:FFFF:FFFFFFFFF,,FFFFF::FFF:FF:FF  
@A00155:342:HHGFNDSXY:1:2514:14850:1376 1:N:0:GAACCTAG+TCCGCATA  
ATCTCAATGCCGAGAGGGATGTGGAGGGCGAGAGAGAGCGACTTCTCTCGGGCCACAGCCTTACAGC  
TGTGGAGCACGGTATCCTCTGCCGAAACAGAGGTTGGACAAGACCGGAGGGGTCTCCTAGTTCCAAAG  
+  
FFFFFFFFF:,FFF,FFFFFFFFF:FFFFFFFFF:FFFFFFFFFFFFFFFFFFFFFFFFFFFFFFFFFFFFF:FFF,FFFFFFFF  
FF,FFFFFFFFF,FFFFFFFFFFFFFFFFF:FFFFFFFFF:FFFFFFFFFFFFF:FFFFFFFFF,,::FFFF  
@A00155:342:HHGFNDSXY:1:2514:19407:6762 1:N:0:GAACCTAG+TCCGCATA  
TGTCCACTTAAGGACTCTCCTCTGGCCTATGGTCATCTCAATGCCGAGAGGGATGTGGAGGGCGAGAG  
AGAGCGACTTCTCTCGGGCCACAGCCTTACAGCTGTGGAGCACGGTATCCTCTGCCGAAACAGAGGT  
+  
FFFFFFFFFFFFFFFFFFFFFFFFFFFFFFFFFFFFFFFFFFFFFFFFFFFFFFFFFFFFFFFFFFFFFFFFFFFFFFFFFFFFFFFFFFFFFFFFFFFFFFFFFFFFF  
FFFFFFFFFFFFFFFFFFFFFFFFFFFFFFFFFFFFFFFFFFFFFFFFFFFFFFFFFFFFFFFFFFFFFFFFFFFFFFFFFFFFFFFFFFFFFFFFFFFFFFFFFFFFF  
@A00155:342:HHGFNDSXY:1:2514:27272:20196 1:N:0:GAACCTAG+TCCGCATA  
AGCGACTTCTCTCGGGCCACAGCCTTACAGCTGTGGAGCACGGTATCCTCTGCCGAAACAGAGGTTG  
GACAAGACCGGAGGGGTCTCCTAGTTCCAAAGGAGATGTACTCCGGAATTGTTACGACCTACCGTGT  
+  
FFFFFFFF:FFF:FF,FFF::FFFFFFFF:FFFFFFFFFFFFFFFFFFFFFFFFFFFFFFFFFFFFF::FFFF:FFFF:F:FFFF,:  
FFFFFFFFF:,FFFFFFFFFFFFFFFFFFFFFFFFFFFFFFFFFFFFFFFFFFFFFFFFFFFFFFFFFFFFF:FFF,FFFFFFFFF,F,FF  
@A00155:342:HHGFNDSXY:1:2514:28103:23015 1:N:0:GAACCTAG+TCCGCATA  
CTTCTCTCGGGCCACAGCCTTACAGCTGTGGAGCACGGTATCCTCTGCCGAAACAGAGGTTGGACAA  
GACCGGAGGGGTCTCCTAGTTCCAAAGGAGATGTACTCCGGGCTTGTTACGACCTACCGTGTAAGTC  
+

FFFFFFFFFFFFFFFFFFFFFFFFFFFFFFFFFFFFFFFFFFFFFFFFFFFFFFFFFFFFFFFFFFFFFFFF  
FFFFFFFFFFFFFFFFFFFFFFFFFFFFFFFFFFFFFFFFFFFFFFFFFFFFFFFFFFFFFFFFFFFFFFFF:FFFFFFFFFFFF  
@A00155:342:HHGFNDSXY:1:2514:19931:26647 1:N:0:GAACCTAG+TCCGCATA  
GCGACTTCTCTCGGGCCCCACAGCCTTACAGCTGTGGAGCACGGTATCCTCTGCCGAAACAGAGGTTGG  
ACAAGACCGGAGGGGTCTCCTAGTTCCAAAGGAGATGTACTCCGGGCTTGTTACGACCTACCGTGTA  
+  
FFFFFFFFFFFFFFFFFFFFFFFFFFFFFFFFFFFFFFFFFFFFFFFFFFFFFFFFFFFFFFFFFFFFFFFF:FFFFFFFFFFFFFFFFFFFFFFFFFFFFFFFF  
FFFFFFFFFFFFFFFFFFFFFFFFFFFFFFFFFFFFFFFFFFFFFFFFFFFFFFFFFFFFFFFFFFFFFFFF:FFFFFFFFFFFFFFFFFFFFFFFFFFFFFFFF  
@A00155:342:HHGFNDSXY:1:2514:16043:34538 1:N:0:GAACCTAG+TCCGCATA  
GTAGGTCGTGAACAAGCCCGGAGTACATCTCCTTTGGAACCAGGAGACCCCTCCGGTCTTGTTCAACC  
TCTGTTTCGGCAGAGGATACCGTGCTCCACAGCTGTAAGGCTGTGGGCCCGAGAGAAGTCGCTCTCTC  
+  
FFFFFFFFFFFFFFFFFFFF,FFFFFFFFFFFFFFFFFFFFFFFFFFFFFFFFFFFFFFFFFFFFFFFFFFFFFFFFFFFFFFFFFFFFFFFF:FFFFFFFFFFFFF  
FFFFFFFFFFFFFFFFFFFF:FFFFFFFFFFFFFFFFFFFFFFFFFFFFFFFFFFFFFFFFFFFFFFFFFFFFFFFFFFFFFFFFFFFFFFFFFFFFFFFF  
@A00155:342:HHGFNDSXY:1:2515:17933:18082 1:N:0:GAACCTAG+TCCGCATA  
CTCAATGCCGAGAGGGATGTAGAGGGCGAGAGAGAGCGACTTCTCTCGGGCCCCACAGCCTTACAGCTG  
TGGAGCACGGTATCCTCTGCCGAAACAGAGGTTGGACAAGACCGGAGGGGTCTCCTAGTTCCAAAGGA  
+  
F,FF:,FF::FFF:FFF:FFFFFFFF:FFF,F:FFF,FFFFFFFF,F:F,,F:FFFFFFFFFFFFFFFF  
FFFFFFFFFFFF:FFF:F,FFFF,FF:FFFF:F::FFFFFF:FFF::FFF:FFFF,F::FFF,FFF:FF  
@A00155:342:HHGFNDSXY:1:2515:17390:22905 1:N:0:GAACCTAG+TCCGCATA  
GGAGGGCGAGAGAGAGCGACTTCTCTCGGGCCCCACAGCCTTACAGCTGTGGAGCACGGTATCCTCTGC  
CGAAACAGAGGTTGGACAAGACCGGAGGGGTCTCCTGGTTCCAAAGGAGATGTACTCCGGGCTTGTTCC  
+  
FFFFFFFFFFFFFFFFFFFFFFFFFFFFFFFFFFFFFFFFFFFFFFFFFFFFFFFFFFFFFFFFFFFFFFFFFFFFFFFFFFFFFFFFFFFFFFFFFFFFFFFF  
FFFFFFFFFFFFFFFFFFFFFFFFFFFFFFFFFFFFFFFFFFFFFFFFFFFFFFFFFFFFFFFFFFFFFFFFFFFFFFFFFFFFFFFFFFFFFFFFFFFFFFFF  
@A00155:342:HHGFNDSXY:1:2515:17436:24518 1:N:0:GAACCTAG+TCCGCATA  
GTCCACTTAAGGACTCACCTCTGGCCTATGGTCATCTCAATGCCGAGAGGGATGTGGAGGGCGAGAGA  
GAGCGACTTCTCTCGGGCCCCACAGCCTTACAGCTGTGGAGCACGGTATCCTCTGCCGAAAC  
+  
FFFFFFFFFFFFFFFFFFFFFFFFFFFFFFFFFFFFFFFFFFFFFFFFFFFFFFFFFFFFFFFFFFFFFFFF:FFFFFFFFF:FFFFFFFFF,FFFFFFFFFFFF  
FFFFFFFFFFFFFFFFFFFFFFFFFFFFFFFFFFFFFFFFFFFFFFFFFFFFFFFFFFFFFFFFFFFFFFFF:FFFFFFFFF:FFFFFFFFF:,FFFFF  
@A00155:342:HHGFNDSXY:1:2515:30029:31360 1:N:0:GAACCTAG+TCCGCATA  
GATCAGCTGTGTCCACTTAAGGACTCACCTCTGGCCTATGGTCATCTCAATGCCGAGAGGGATGTGGA  
GGGCGAGAGAGAGCGACTTCTCTCGGGCCCCACAGCCTTACAGCTGTGGAGCACGGTATCCTCTGC  
+  
FFFFFFFFFFFFFFFFFFFFFFFFFFFFFFFFFFFFFFFFFFFFFFFFFFFFFFFFFFFFFFFFFFFFFFFFFFFFFFFFFFFFFFFFFFFFFFFFFFFFFFFF  
FFFFFFFFFFFFFFFFFFFFFFFFFFFFFFFFFFFFFFFFFFFFFFFFFFFFFFFFFFFFFFFFFFFFFFFFFFFFFFFFFFFFFFFFFFFFFFFFFFFFFFFF  
@A00155:342:HHGFNDSXY:1:2515:22218:36871 1:N:0:GAACCTAG+TCCGCATA  
ATCTCAATGCCGAGAGGGATGTGGAGGGCGAGAGAGAGCGACTTCTCTCGGGCCCCACAGCCTTACAGC  
TGTGGAGCACGGTATCCTCTGCCGAAACAGAGGTTGGACAAGACCGGAGGGGTCTCCTAGTTCCAAAG  
+  
FFFFFFFFFFFFFFFFFFFFFFFFFFFFFFFFFFFFFFFFFFFFFFFFFFFFFFFFFFFFFFFFFFFFFFFF:FFFFFFFFFFFFFFFFFFFFFFFFFFFFFFFF  
FFFFFFFFFFFFFFFFFFFFFFFFFFFFFFFFFFFFFFFFFFFFFFFFFFFFFFFFFFFFFFFFFFFFFFFFFFFFFFFFFFFFFFFFFFFFFFFFFFFFFFFF  
@A00155:342:HHGFNDSXY:1:2516:16025:6950 1:N:0:GAACCTAG+TCCGCATA  
TGTGTCCACTTAAGGACTCACCTCTGGCCTATGGTCATCTCAATGCCGAGAGGGATGTGGAGGGCGAG  
AGAGAGCGACTTCTCTCGGGCCCCACAGCCTTACAGCTGTGGAGCACGGTATCCTCTGCCGAAACAGAG  
+  
:FFFFFFFFFFFFFFFFFFFFFFFFFFFFFFFFFFFFFFFFFFFFFFFFFFFFFFFFFFFFFFFFFFFFFFFFFFFFFFFFFFFFFFFFFFFFFFFFFFFFFFFF  
FFFFFFFFFFFFFFFFFFFFFFFFFFFFFFFFFFFFFFFFFFFFFFFFFFFFFFFFFFFFFFFFFFFFFFFFFFFFFFFFFFFFFFFFFFFFFFFFFFFFFFFF  
@A00155:342:HHGFNDSXY:1:2516:21206:14450 1:N:0:GAACCTAG+TCCGCATA  
CTTCTCTCGGGCCCCACAGCCTTACATCTGTGGAGCACGGTATCCTCTGCCGAAACAGAGGTTGGACAA  
GACCGGAGGGGTCTCCTAGTTCCAAAGGAGATGTACTCCGGGCTTGTTACGACCTACCGTGTAAGTC  
+

```
FFFFFFFFFFFFFFFFFFFFFFFFFFFFFFFFFFFFFFFFFFFFFFFFFFFFFFFFFFFFFFFFFFFFFFFFF:FFFFFFFFFFFFFFFFFFFFFFFFFFFFFFFFFFFFF  
FFFFFFFFFFFFFFFFFFFFFFFFFFFFFFFFFFFFFFFFFFFFFFFFFFFFFFFFFFFFFFFFFFFFFFFFF@A00155:342:HHGFNDSXY:1:2516:3405:20509 1:N:0:GAACCTAG+TCCGCATA  
GAGAGAGAGCGACTTCTCTCGGGCCCACAGCCTTACAGCTGTGGAGCACGGTATCCTCTGCCGAAACA  
GAGGTTGGACAAGACCGGAGGGGTCTCCTAGTTCCAAAGGAGATGTACTCCGGGCTTGTTACGACCT  
+  
FFFFFFFFFFFFFFFFFFFFFFFFFFFFFFFFFFFFFFFFFFFFFFFFFFFFFFFFFFFFFFFFFFFFFFFF:FFFFFFFFFFFFFFFFFFFFFFFFFFFFFFFF  
FFFFFFFFFFFFFFFFFFFFFFFFFFFFFFFFFFFFFFFFFFFFFFFFFFFFFFFFFFFFFFFFFFFFFFFF,FFFFFFFF,FFF:FFFFFFFFF:FFF  
@A00155:342:HHGFNDSXY:1:2516:28546:22842 1:N:0:GAACCTAG+TCCGCATA  
AGAGAGAGCGACTTCTCTCGGGCCCACAGCCTTACAGCTGTGGAGCACGGTATCCTCTGCCGAAACAG  
AGGTTGGACAAGACCGGAGGGGTCTCCTAGTTCCAAAGGAGATGTACTCCGGGCTTGTTACGACCTA  
+  
FFFFFFFFFFFFFFFFFFFFFFFFFFFFFFFFFFFFFFFFFFFFFFFFFFFFFFFFFFFFFFFFFFFFFFFF:FFFFFFFFFFFFFFFFFFFFFFFFFFFFFFFF  
FFFFFFFFFFFFFFFFFFFFFFFFFFFFFFFFFFFFFFFFFFFFFFFFFFFFFFFFFFFFFFFFFFFFFFFF:FFFFFFFFFFFFFFFFFFFFFFFFFFFFFFFF  
@A00155:342:HHGFNDSXY:1:2517:23529:1407 1:N:0:GAACCTAG+TCCGCATA  
TGTGGAGGGCGAGAGAGAGCGACTTCTCTCGGGCCCACAGCCTTACAGCTGTGGAGCACGGTATCCTC  
TGCCGAAACAGAGGTTGGACAAGACCGGAGGGGTCTCCTGGTTCCAAAGGAGATGTACTCCGGG  
+  
FF:FFFFFFFFFFFFFFFFFFFFFFFFFFFFFFFFFFFFFFFFFFFFFFFFFFFFFFFFFFFFFFFFFFFF:FFFFFFFFFFFFFFFFFFFFFFFFFFFFFFFF  
FFFFFFFFFFFFFFFFFFFFFFFFFFFFFFFFFFFFFFFFFFFFFFFFFFFFFFFFFFFFFFFFFFFFFFFF,FFFFFFFF  
@A00155:342:HHGFNDSXY:1:2517:2582:11443 1:N:0:GAACCTAG+TCCGCATA  
CATCTCAATGCCGAGAGGGATGTGGAGGACGAGAGAGAGCGACTTCTCTCGGGCCCACAGCCTTACAG  
CTGTGGAGCACGGTATCCTCTGCCGAAACAGAGGTTGGACAAGACCGGAGGGGTCTCCTAGTTCCAAA  
+  
FFFFFFFFFFFFFFFFFFFFFFFFFFFFFFFFFFFFFFFFFFFFFFFFFFFFFFFFFFFFFFFFFFFFFFFF:FFFFFFFFFFFFFFFFFFFFFFFFFFFFFFFF  
FFFFFFFFFFFFFFFFFFFFFFFFFFFFFFFFFFFFFFFFFFFFFFFFFFFFFFFFFFFFFFFFFFFFFFFF:FFFFFFFFFFFFFFFFFFFFFFFFFFFFFFFF  
@A00155:342:HHGFNDSXY:1:2517:3007:17440 1:N:0:GAACCTAG+TCCGCATA  
GGATGTGGAGGGCGAGAGAGAGCGACTTCTCTCGGGCCCACAGCCTTACAGCTGTGGAGCACGGTATC  
CTCTGCCGAAACAGAGGTTGGACAAGACCGGAGGGGTCTCCTAGTTCCAAAGGAGATG  
+  
FFFFFFFFFFFFFFFFFFFFFFFFFFFFFFFFFFFFFFFFFFFFFFFFFFFFFFFFFFFFFFFFFFFFFFFF:FF  
FFFFFFFFFFFFFFFFFFFFFFFFFFFFFFFFFFFFFFFFFFFFFFFFFFFFFFFFFFFFFFFFFFFFFFFF:F:  
@A00155:342:HHGFNDSXY:1:2517:7726:18662 1:N:0:GAACCTAG+TCCGCATA  
CAGCCTTACAGCTGTGGAGCACGGTATCCTCTGCCGAAACAGAGGTTGGACAAGACCGGAGGGGTCTC  
CTAGTTCCAAAGGAGATGTACTCCGGGCTTGTTACGACCTACCGTGTAAGTCGTAGTCTAGTAGGCT  
+  
FFFFFFFFFFFFFFFFFFFFFFFFFFFFFFFFFFFFFFFFFFFFFFFFFFFFFFFFFFFFFFFFFFFFFFFF:FFFFFFFFFFFFF  
FFFFFFFFFFFFFFFFFFFFFFFFFFFFFFFFFFFFFFFFFFFFFFFFFFFFFFFFFFFFFFFFFFFFFFFF:FFFFFFFFFFFFFFFFFFFFFFFF  
@A00155:342:HHGFNDSXY:1:2517:2112:20838 1:N:0:GAACCTAG+TCCGCATA  
GGA CTACCTCTGGCCTATGGTCATCTCAATGCCGAGAGGGATGTGGAGGGCGAGAGAGAGCGACTTC  
TCTCGGGCCCACAGCCTTACAGCTGTGGAGCACGGTATCCTCTGCCGAAACAGAGGTTGGACAAGACC  
+  
FFFFFFFFFFFFFFFFFFFFFFFFFFFFFFFFFFFFFFFFFFFFFFFFFFFFFFFFFFFFFFFFFFFFFFFF:FFFFFFF  
FFFFFFFFFFFFFFFFFFFFFFFFFFFFFFFFFFFFFFFFFFFFFFFFFFFFFFFFFFFFFFFFFFFFFFFF:FFFFFFF:FFFFFFFFFFFFFFFF:FFF  
@A00155:342:HHGFNDSXY:1:2517:11939:29997 1:N:0:GAACCTAG+TCCGCATA  
CCCTCCACATCCCTCTCGGCATTGAGATGACCATAGGCCAGAGGTGAGTCCTTAAGTGGACACAGCTG  
ATCTAAGGCGGTGTGGTGGGGCATGGGTTTGAACCCCCATGACGGTCGGAGTCTAGTAGGCTCCCTGA  
+  
FFFFFFFFFFFFFFFFFFFFFFFFFFFFFFFFFFFFFFFFFFFFFFFFFFFFFFFFFFFFFFFFFFFFFFFF:FFFFFFFFFFFFFFFFFFFFFFFFFFFFF  
FFFFFFFFFFFFFFFFFFFFFFFFFFFFFFFFFFFFFFFFFFFFFFFFFFFFFFFFFFFFFFFFFFFFFFFF:FFFFFFFFFFFFFFFFFFFFFFFFFFFFF  
@A00155:342:HHGFNDSXY:1:2518:14696:3176 1:N:0:GAACCTAG+TCCGCATA  
GACTTCTCTCGGGCCCACAGCCTTACAGCTGTGGAGCACGGTATCCTCTGCCGAAACAGAGGTTGGAC  
AAGACCGGAGGGGTCTCCTAGTTCCAAAGGAGATGTACTCCGGGCTTGTTACGACCTACCGTGTAAG  
+
```

FFFFFFFFFFFFFFFFFFFFFFFFFFFFFFFFFFFFFFFFFFFFFFFFFFFFFFFFFFFFFFFFFFFFFFFF  
FFFFFFFFFFFFFFFFFFFFFFFFFFFFFFFFFFFFFFFFFFFFFFFFFFFFFFFFFFFFFFFFFFFFFFFF  
@A00155:342:HHGFNDSXY:1:2518:6985:17284 1:N:0:GAACCTAG+TCCGCATA  
GGACTCACCTCTGGCCTATGGTCATCTCAATGCCGAGAGGGATGTGAAGGGCGAGAGAGAGCGACTTC  
TCTCGGGCCACAGCCTTACAGCTGTGGAGCACGGTATCCTCTGCCGAAACAGAGGTTGGACAAGACC  
+  
FFFFFFFFFFFFFFFFFFFFFFFFFFFFFFFFFFFFFFFFFFFFFFFFFFFFFFFFFFFFFFFFFFFFFFFF  
FFFFFFFFFFFFFFFFFFFFFFFFFFFFFFFFFFFFFFFFFFFFFFFFFFFFFFFFFFFFFFFFFFFFFFFF  
@A00155:342:HHGFNDSXY:1:2518:11948:28291 1:N:0:GAACCTAG+TCCGCATA  
TTAAGGACTCACCTCTGGCCTATGGTCATCTCAATGCCGAGAGGGATGTGAAGGGCGAGAGAGAGCGA  
CTTCTCTCGGGCCACAGCCTTACAGCTGTGGAGCACGGTATCCTCTGCCGAAACAGAGGTTGGACAA  
+  
FFFFFFFFFFFFFFFFFFFFFFFFFFFFFFFFFFFFFFFFFFFFFFFFFFFFFFFFFFFFFFFFFFFFFFFF  
FFFFFFFFFFFFFFFFFFFFFFFFFFFFFFFFFFFFFFFFFFFFFFFFFFFFFFFFFFFFFFFFFFFFFFFF  
@A00155:342:HHGFNDSXY:1:2518:24478:31610 1:N:0:GAACCTAG+TCCGCATA  
CTGTGTCCACTTAAGGACTCACCTCTGGCCTATGGTCATCTCAATGCCGAGAGGGATGTGAAGGGCGA  
GAGAGAGCGACTTCTCTCGGGCCACAGCCTTACAGCTGTGGAGCACGGTATCCTCTGCCGAAACAGA  
+  
FFFFFFFFFFFFFFFFFFFFFFFFFFFFFFFFFFFFFFFFFFFFFFFFFFFFFFFFFFFFFFFFFFFFFFFF  
FFFFFFFFFFFFFFFFFFFFFFFFFFFFFFFFFFFFFFFFFFFFFFFFFFFFFFFFFFFFFFFFFFFFFFFF  
@A00155:342:HHGFNDSXY:1:2518:6162:34428 1:N:0:GAACCTAG+TCCGCATA  
CAATGCCGAGAGGGATGTGGAGGGCGAGAGAGAGCGACTTCTCTCGGGCCACAGCCTTACAGCTGTG  
GAGCACGGTATCCTCTGCCGAAACAGAGGTTGGACAAGACCGGAGGGGTCTCCTGGTTCCAAAGGAGA  
+  
FFFFFFFFFFFFFFFFFFFFFFFFFFFFFFFFFFFFFFFFFFFFFFFFFFFFFFFFFFFFFFFFFFFFFFFF  
FFFFFFFFFFFFFFFFFFFFFFFFFFFFFFFFFFFFFFFFFFFFFFFFFFFFFFFFFFFFFFFFFFFFFFFF  
@A00155:342:HHGFNDSXY:1:2519:13015:8249 1:N:0:GAACCTAG+TCCGCATA  
GAGCGACTTCTCTCGGGCCACAGCCTTACAGCTGTGGAGCACGGTATCCTCTGCCGAAACAGAGGTT  
GGACAAGACCGGAGGGGTCTCCTAGTTCCAAAGGAGATGTACTCCGGGCTTGTTACGACCTACCGTG  
+  
FFFFFFFFFFFFFFFFFFFFFFFFFFFFFFFFFFFFFFFFFFFFFFFFFFFFFFFFFFFFFFFFFFFFFFFF  
FFFFFFFFFFFFFFFFFFFFFFFFFFFFFFFFFFFFFFFFFFFFFFFFFFFFFFFFFFFFFFFFFFFFFFFF  
@A00155:342:HHGFNDSXY:1:2519:2013:16595 1:N:0:GAACCTAG+TCCGCATA  
AAAGACTCACCTCTGGCCTATGGTCATCTCAATGCCGAGAGGGATGTGGAGGGCGAGAGAGAGCGACT  
TCTCTCGGGCCACAGCCTTACAGCTGTGGAGCACGGTATCCTCTGCCGAAACAGAGGTTGGACAAGA  
+  
FF:FFFFFFFF:FFFFFFFF:FFFFFF:FFFF,FFF:FFFFFFFF:FFFFFFFFFFFFFFFFFFFF  
FFFFFFFFFFFFFFFFFFFFFFFFFFFFFFFFFFFFFFFFFFFFFFFFFFFFFFFFFFFFFFFFFFFFF:  
@A00155:342:HHGFNDSXY:1:2519:26928:18881 1:N:0:GAACCTAG+TCCGCATA  
CCTTACAGCTGTGGAGCACGGTATCCTCTGCCGAAACAGAGGTTGGACAAGACCGGAGGGGTCTCCTA  
GTTCCAAAGGAGATGTACTCCGGGCTTGTTACGACCTACCGTGTAAGTCGTAGTCTAGTAGGCTACC  
+  
FFFFFFFFFFFFFFFFFFFFFFFFFFFFFFFFFFFFFFFFFFFFFFFFFFFFFFFFFFFFFFFFFFFFFFFF  
FFFFFFFFFFFFFFFFFFFFFFFFFFFFFFFFFFFFFFFFFFFFFFFFFFFFFFFFFFFFFFFFFFFFFFFF:  
@A00155:342:HHGFNDSXY:1:2519:9679:22701 1:N:0:GAACCTAG+TCCGCATA  
ATCTCAATGCCGAGAGGGATGTGGAGGGCGAGAGAGAGCGACTTCTCTCGGGCCACAGCCTTACAGC  
TGTGGAGCACGGTATCCTCTGCCGAAACAGAGGTTGGACAAGACCGGAGGGGTCTCCTAGTTCCAAAG  
+  
FFFFFFFFFFFFFFFFFFFFFFFFFFFFFFFFFFFFFFFFFFFFFFFFFFFFFFFFFFFFFFFFFFFFFFFF  
FFFFFFFFFFFFFFFFFFFFFFFFFFFFFFFFFFFFFFFFFFFFFFFFFFFFFFFFFFFFFFFFFFFFFFFF  
@A00155:342:HHGFNDSXY:1:2519:12228:22983 1:N:0:GAACCTAG+TCCGCATA  
CTGGCCTATGGTCATCTCAATGCCGAGAGGGATGTGGAGGGCGAGAGAGAGCGACTTCTCTCGGGCC  
ACAGCCTTACAGCTGTGGAGCACGGTATCCTCTGCCGAAACAGAGGTTGGACAAGACCGGAGGGGTCT  
+

FFFFFFFFFFFFFFFF:FFFFFFFFFFFFFFFF:FFFFFFFFFFFFFFFFFFFFFFFFFFFFFFFFFFFFFFFF  
FFFFFFFFFFFFFFFF:FFFFFFFFFFFFFFFFFFFFFFFFFFFFFFFFFFFFFFFFFFFFFFFFFFFFFFFF:FFFF:FFFFFFFF  
@A00155:342:HHGFNDSXY:1:2519:7491:35978 1:N:0:GAACCTAG+TCCGCATA  
CGACTTCTCTCGGGCCACAGCCTTACAGCTGTGGAGCACGGTATCCTCTGCCGAAACAGAGGTTGGA  
CAAGACCGGAGGGGTCTCCTAGTTCCAAAGGAGATGTACTCCGGGCTTGTTACGACCTACCGTGTAA  
+  
FFFFFFFFFFFFFFFFFFFFFFFFFFFFFFFFFFFFFFFFFFFFFFFFFFFFFFFFFFFFFFFF,FFFFFFFFFFFFFFFFFFFFFFFF  
FFFFFFFFFFFFFFFFFFFFFFFFFFFFFFFFFFFFFFFFFFFFFFFFFFFFFFFFFFFFFFFF:FFFFFFFFFFFF:FFFFFFFF:FFFF  
@A00155:342:HHGFNDSXY:1:2520:7536:33520 1:N:0:GAACCTAG+TCCGCATA  
TCCACATCCCTCTCGGCATTGAGATGACCATAGGCCAGAGGTGAGTCCTTAAGTGGACACAGCTGATC  
TAAGGCGGTGTGGCGGGGCATGGGTTTGAACCCCATGACGGTCGGAGTCTAGTAGGCTCCCTGATGA  
+  
FFFFFFFFFFFFFFFFFFFFFFFF:FFFFFFFFFFFFFFFFFFFFFFFFFFFFFFFFFFFFFFFFFFFFFFFFFFFFFFFF  
FFFFFFFFFFFFFFFFFFFFFFFFFFFFFFFFFFFFFFFFFFFFFFFFFFFFFFFFFFFFFFFFFFFFFFFFFFFFFFFF  
@A00155:342:HHGFNDSXY:1:2521:28230:1658 1:N:0:GAACCTAG+TCCGCATA  
ATGCCGAGAGGGATGTGGAGGGCGAGAGAGAGCGACTTCTCTCGGGCCACAGCCTTACAGCTGTGGA  
GCACGGTATCCTCTGCCGAAACAGAGGTTGGACAAGACCGGAGGGGTCTCCTGGTTCCAAAGGAGATG  
+  
FF:FFFFFFFFFFFFFFFF:FFFF:FFFF:FFF:FFFFFFFFFFFFFFFFFFFFFFFFFFFFFFFF,FFFFFFFF:F  
:FFFFFFFF:F:FFFFFF,FFFFFFFF:FFFFFFFFFFFFFFFFFFFFFFFFFFFFFFFFFFFFFFFF,FFFFF  
@A00155:342:HHGFNDSXY:1:2521:7265:30483 1:N:0:GAACCTAG+TCCGCATA  
AGGGCGAGAGAGAGCGACTTCTCTCGGGCCACAGCCTTACAGCTGTGGAGCACGGTATCCTCTGCCG  
AAACAGAGGTTGGACAAGACCGGAGGGGTCTCCTAGTTCCAAAGGAGATGTACTCCGGGCTTGTTAC  
+  
FFFFFFFFFFFFFFFFFFFFFFFFFFFFFFFFFFFFFFFFFFFFFFFFFFFFFFFFFFFFFFFF,FFFFFFFFFFFFFFFFFFFFFFFF  
FFFFFFFFFFFFFFFFFFFFFFFFFFFFFFFFFFFFFFFFFFFFFFFFFFFFFFFFFFFFFFFFFFFFFFFFFFFFFFFF  
@A00155:342:HHGFNDSXY:1:2522:9408:14904 1:N:0:GAACCTAG+TCCGCATA  
AGGGCGAGAGAGAGCGACTTCTCTCGGGCCACAGCCTTACAGCTGTGGAGCACGGTATCCTCTGCCG  
AAACAGAGGTTGGACAAGACCGGAGGGGTCTCCTAGTTCCAAAGGAGATGTACTCCGGGCTTGTT  
+  
FFFFFFFFFFFFFFFFFFFFFFFFFFFFFFFFFFFFFFFFFFFFFFFFFFFFFFFFFFFFFFFFFFFFFFFFFFFFFFFF  
FFFFFFFFFFFFFFFFFFFFFFFFFFFFFFFFFFFFFFFFFFFFFFFFFFFFFFFFFFFFFFFFFFFFFFFFFFFFFFFF  
@A00155:342:HHGFNDSXY:1:2522:7636:23171 1:N:0:GAACCTAG+TCCGCATA  
TGTGGAGGGCGAGAGAGAGCGACTTCTCTCGGGCCACAGCCTTACAGCTGTGGAGCACGGTATCCTC  
TGCCGAAACAGAGGTTGGACAAGACCGGAGGGGTCTCCTAGTTCCAAAGGAGATGTACTCCGGG  
+  
FFFFFFFFFFFFFFFFFFFFFFFFFFFFFFFFFFFFFFFFFFFFFFFFFFFFFFFFFFFFFFFFFFFFFFFFFFFFFFFF  
FF:FFFFFFFFFFFFFFFFFFFFFFFFFFFFFFFFFFFFFFFFFFFFFFFFFFFFFFFFFFFFFFFFFFFFFFFF  
@A00155:342:HHGFNDSXY:1:2522:23710:24142 1:N:0:GAACCTAG+TCCGCATA  
GGATGTGGAGGGCGAGAGAGAGCGACTTCTCTCGGGCCACAGCCTTACAGCTGTGGAGCACGGTATC  
CTCTGCCGAAACAGAGGTTGGACAAGACCGGAGGGGTCTCCTAGTTCCAAAGGAGATGTACTCC  
+  
FFFFFFFFFFFFFFFFFFFFFFFFFFFFFFFFFFFFFFFFFFFFFFFFFFFFFFFFFFFFFFFFFFFFFFFFFFFFFFFF  
FFFFFFFFFFFFFFFFFFFFFFFFFFFFFFFFFFFFFFFFFFFFFFFFFFFFFFFFFFFFFFFFFFFFFFFFFFFFFFFF  
@A00155:342:HHGFNDSXY:1:2522:32741:24314 1:N:0:GAACCTAG+TCCGCATA  
AGGGATGTGGAGGGCGAGAGAGAGCGACTTCTCTCGGGCCACAGCCTTACAGCTGTGGAGCACGGTA  
TCCTCTGCCGAAACAGAGGTTGGACAAGACCGGAGGGGTCTCCTAGTTCCAAAGGAGATGTACTCCG  
+  
FFFFFFFFFFFFFF:FFFFFFFFFFFFFFFF:FFFFFF:FFFFFFFFFFFFFFFFFFFFFFFFFFFFFFFF  
FFFFFFFFFFFFFFFFFFFFFFFFFFFFFFFFFFFFFFFF:F,FFFFFF:FFFFFFFFFFFFFFFFFFFFFFFF:FFFFF  
@A00155:342:HHGFNDSXY:1:2522:16613:33771 1:N:0:GAACCTAG+TCCGCATA  
GGATGTGGAGGGCGAGAGAGAGCGACTTCTCTCGGGCCACAGCCTTACAGCTGTGGAGCACGGTATC  
CTCTGCCGAAACAGAGGTTGGACAAGACCGGAGGGGTCTCCTAGTTCCAAAGGAGATGTACTCC  
+

FFFFF:FFFFFFFFFFFFFFFFFFFFFFFFFFFFFFFFFFFFFFFFFFFFFFFFFFFFFFFFFFFFFFFFFFFFF  
FFFFFFFFFFFFFFFFFFFFFFFFFFFFFFFFFFFFFFFFFFFFFFFFFFFFFFFFFFFFFFFFFFFFFFFFFFFF  
@A00155:342:HHGFNDSXY:1:2522:18973:35321 1:N:0:GAACCTAG+TCCGCATA  
ATGCCCCGCCACACCGCCTTAGATCAGCTGTGTCCACTTAAGAACTCACCTCTGGCCTATGGTCATCT  
CAATGCCGAGAGGGATGTGGAGGGCGAGAGAGAGCGACTTCTCTCGGGCCCACAGCCTTACAGC  
+  
FFFFFFFFFFFFFFFFFFFFFFFFFFFFFFFFFFFFFFFFFFFFFFFFFFFFFFFFFFFFFFFFFFFFFFFFFFFF  
FFFFFFFFFFFFFFFFFFFFFFFFFFFFFFFFFFFFFFFFFFFFFFFFFFFFFFFFFFFFFFFFFFFFFFFFFFFF  
@A00155:342:HHGFNDSXY:1:2523:19117:4726 1:N:0:GAACCTAG+TCCGCATA  
AGCGACTTCTCTCGGGCCCACAGCCTTACAGCTGTGGAGCACGGTATCCTCTGCCGAAACAGAGGTTG  
GACAAGACCGGAGGGGTCTCCTGGTTCCAAAGGAGATGTACTCCGGGCTTGTTACAGACCTACCGTGT  
+  
FFFFFFFFFFFFFFFFFFFFFFFFFFFFFFFFFFFFFFFFFFFFFFFFFFFFFFFFFFFFFFFFFFFFFFFFFFFF  
FFFFFFFFFFFFFFFFFFFFFFFFFFFFFFFFFFFFFFFFFFFFFFFFFFFFFFFFFFFFFFFFFFFFFFFFFFFF  
@A00155:342:HHGFNDSXY:1:2523:30553:19304 1:N:0:GAACCTAG+TCCGCATA  
GACTCACCTCTGGCCTATGGTCATCTCAATGCCGAGAGGGATGTAGAGGGCGAGAGAGAGCGACTTCT  
CTCGGGCCCACAGCCTTACAGCTGTGGAGCACGGTATCCTCTGCCGAAACAGAGGTTGGACAAGACCG  
+  
FFFFFFFFFFFFFFFFFFFFFFFFFFFFFFFFFFFFFFFFFFFFFFFFFFFFFFFFFFFFFFFFFFFFFFFFFFFF  
FFFFFFFFFFFFFFFFFFFFFFFFFFFFFFFFFFFFFFFFFFFFFFFFFFFFFFFFFFFFFFFFFFFFFFFFFFFF  
@A00155:342:HHGFNDSXY:1:2523:31186:19648 1:N:0:GAACCTAG+TCCGCATA  
GACTCACCTCTGGCCTATGGTCATCTCAATGCCGAGAGGGATGTAGAGGGCGAGAGAGAGCGACTTCT  
CTCGGGCCCACAGCCTTACAGCTGTGGAGCACGGTATCCTCTGCCGAAACAGAGGTTGGACAAGACCG  
+  
FFFFFFFFFFFFFFFFFFFFFFFFFFFFFFFFFFFFFFFFFFFFFFFFFFFFFFFFFFFFFFFFFFFFFFFFFFFF  
FFFFFFFFFFFFFFFFFFFFFFFFFFFFFFFFFFFFFFFFFFFFFFFFFFFFFFFFFFFFFFFFFFFFFFFFFFFF  
@A00155:342:HHGFNDSXY:1:2523:18105:23891 1:N:0:GAACCTAG+TCCGCATA  
CTCTGGCCTATGGTCATCTCAATGCCGAGAGGGATGTGAAGGGCGAGAGAGAGCGACTTCTCTCGGGC  
CCACAGCCTTACAGCTGTGGAGCACGGTATCCTCTGCCGAAACAGAGGTTGGACAAGACCGGAG  
+  
FFFFFFFFFFFFFFFFFFFFFFFFFFFFFFFFFFFFFFFFFFFFFFFFFFFFFFFFFFFFFFFFFFFFFFFFFFFF  
FFFFFFFFFFFFFFFFFFFFFFFFFFFFFFFFFFFFFFFFFFFFFFFFFFFFFFFFFFFFFFFFFFFFFFFFFFFF  
@A00155:342:HHGFNDSXY:1:2523:15139:24267 1:N:0:GAACCTAG+TCCGCATA  
ACTTCTCTCGGGCCCACAGCCTTACAGCTGTGGAGCACGGTATCCTCTGCCGAAACAGAGGTTGGACA  
AGACCGGAGGGGTCTCCTAGTTCCAAAGGAGATGTACTCCGGGCTTGTTACAGACCTACCGTGTAAGT  
+  
FFFFFFFFFFFFFFFFFFFFFFFFFFFFFFFFFFFFFFFFFFFFFFFFFFFFFFFFFFFFFFFFFFFFFFFFFFFF  
FFFFFFFFFFFFFFFFFFFFFFFFFFFFFFFFFFFFFFFFFFFFFFFFFFFFFFFFFFFFFFFFFFFFFFFFFFFF  
@A00155:342:HHGFNDSXY:1:2523:28031:31093 1:N:0:GAACCTAG+TCCGCATA  
GACTCACCTCTGGCCTATGGTCATCTCAATGCCGAGAGGGATGTAGAGGGCGAGAGAGAGCGACTTCT  
CTCGGGCCCACAGCCTTACAGCTGTGGAGCACGGTATCCTCTGCCGAAACAGAGGTTGGACAAGACCG  
+  
FFFFFFFFFFFFFFFFFFFFFFFFFFFFFFFFFFFFFFFFFFFFFFFFFFFFFFFFFFFFFFFFFFFFFFFFFFFF  
FFFFFFFFFFFFFFFFFFFFFFFFFFFFFFFFFFFFFFFFFFFFFFFFFFFFFFFFFFFFFFFFFFFFFFFFFFFF  
@A00155:342:HHGFNDSXY:1:2523:23493:36417 1:N:0:GAACCTAG+TCCGCATA  
TCTCTCGGGCCCACAGCCTTACAGCTGTGGAGCACGGTATCCTCTGCCGAAACAGAGGTTGGACAAGA  
CCGAGAGGGGTCTCCTAGTTCCAAAGGAGATGTACTCCGGGCTTGTTACAGACCTACCGTGTAAAGTCGT  
+  
FFFFFFFFFFFFFFFFFFFFFFFFFFFFFFFFFFFFFFFFFFFFFFFFFFFFFFFFFFFFFFFFFFFFFFFFFFFF  
FFFFFFFFFFFFFFFFFFFFFFFFFFFFFFFFFFFFFFFFFFFFFFFFFFFFFFFFFFFFFFFFFFFFFFFFFFFF  
@A00155:342:HHGFNDSXY:1:2524:5249:19225 1:N:0:GAACCTAG+TCCGCATA  
AGAGAGAGCGACTTCTCTCGGGCCCACAGCCTTACAGCTGTGGAGCACGGTATCCTCTGCCGAAACAG  
AGGTTGGACAAGACCGGAGGGGTCTCCTAGTTCCAAAGGAGATGTACTCCGGGCTTGTTACAGACCTA  
+

```
F:FFFFFFF:FFFFFFFF:FFFFFFFF:FFFFFFFF:FFFFFFF:FF:  
F:FFFFFFFFFFFFFFFFFFFFFFFF:FFFFFFFFFFFFFFFFFFFFFFFF:FFFFFFFFFFFFFFFFFFFF  
@A00155:342:HHGFNDSXY:1:2524:8024:20212 1:N:0:GAACCTAG+TCCGCATA  
AGAGAGAGCGACTTCTCTCGGGCCCACAGCCTTACAGCTGTGGAGCACGGTATCCTCTGCCGAAACAG  
AGGTTGGACAAGACCGGAGGGGTCTCCTAGTTCAAAGGAGATGTACTCCGGGCTTGTTTCACGACCT  
+  
FFFFFFFFFFFFFFFFFFFFFFFFFFFFFFFFFFFFFFFFFFFFFFFFFFFFFFFFFFFFFFFFFFFFFFFF  
FFFFFFFFFFFFFFFF:FFFFFFFF:FFFFFFFFFFFFFFFFFFFFFFFFFFFFFFFFFFFFFFFFFFFFF  
@A00155:342:HHGFNDSXY:1:2524:5556:27398 1:N:0:GAACCTAG+TCCGCATA  
ACCTCTGTTTCGGCAGAGGATACCGTGCTCCACAGCTGTAAGGCTGTGGCCCCGAGAGAAGTCGCTCT  
CTCTCGCCCTCCACATCCCTCTCGGCATTGAGATGACCATAGGCCAGAGGAGAGTCCTTAAGTGGACA  
+  
FFFFFFFFFFFFFFFFFFFFFFFFFFFFFFFFFFFFFFFFFFFFFFFFFFFF::FFFFF:FFFFFFFFFFF:FFF  
FFFFFFFF:F:FFFF,:F,FFFFFFFF:FFFFFFFFFFFFFFFF,F:FFFFFFFF:FFFFFF:F:FFFF  
@A00155:342:HHGFNDSXY:1:2524:1344:32784 1:N:0:GAACCTAG+TCCGCATA  
TCCACTTAAGGACTCTCCTCTGGCCTATGGTCATCTCAATGCCGAGAGGGATGTGGAGGGCGAGAGAG  
AGCGACTTCTCTCGGGCCCACAGCCTTACAGCTGTGGAGCACGGTATCCTCTGCCGAAACAGAGGTTG  
+  
F:FF:FFFFFFFF:FFFFFFFF:FFFFFFFFFFFFFFFFFFFFFFFF:FFFFFFFFFFFFFFFFFFFF:FFF  
:FFFFFFFFFFFFFFFFFFFFFFFFFFFFFFFF:F:FFFF:FF:FFFFFFFFFFFFFFFF:F:,FF,FFFF  
@A00155:342:HHGFNDSXY:1:2525:18719:11303 1:N:0:GAACCTAG+TCCGCATA  
GATCAGCTGTGTCCACTTAAGGACTCACCTCTGGCCTATGGTCATCTCAATGCCGAGAGGGATGTAGA  
GGGCGAGAGAGAGCGACTTCTCTCGGGCCCACAGCCTTACAGCTGTGGAGCACGGTATCCTCTGCCGA  
+  
FFFFFFFFFFFFFFFFFFFFFFFFFFFFFFFFFFFFFFFFFFFFFFFFFFFFFFFFFFFFFFFFFFFFFFFF::  
FFFFFFFFFFFFFFFFFFFFFFFFFFFFFFFF:FFFFFFFFFFFFFFFF:FF,FFFFFFFFFFFFFFFFFFFF  
@A00155:342:HHGFNDSXY:1:2525:30282:28260 1:N:0:GAACCTAG+TCCGCATA  
ACCTCTGTTTCGGCAGAGGATACCGTGCTCCACAGCTGTAAGGCTGTGGCCCCGAGAGAAGTCGCTCT  
CTCTCGCCCTCCACATCCCTCTCGGCATTGAGATGACCATAGGCCAGAGGAGAGTCCTTAAGTGGACA  
+  
FFFFFFFFFFFFFFFFFFFFFFFFFFFFFFFFFFFFFFFFFFFFFFFFFFFFFFFFFFFFFFFFFFFFFFFF  
FFFFFFFFFFFFFFFFFFFFFFFFFFFFFFFFFFFFFFFFFFFFFFFFFFFFFFFFFFFFFFFFFFFFFFFF  
@A00155:342:HHGFNDSXY:1:2526:25030:10582 1:N:0:GAACCTAG+TCCGCATA  
TGTGTCCACTTAAGGACTCACCTCTGGCCTATGGTCATCTCAATGCCGAGAGGGATGTGGAGGGCGAG  
AGAGAGCGACTTCTCTCGGGCCCACAGCCTTACAGCTGTGGAGCACGGTATCCTCTGCCGAAACAGAG  
+  
FFFFFFFF:FFFFFFFFFFFFFFFFFFFFFFFFFFFFFFFFFFFFFFFFFFFFFFFFFFFFFFFF:FFFFFFFF  
FFFFFFFFFFFFFFFFFFFFFFFFFFFFFFFFFFFFFFFFFFFFFFFFFFFFFFFFFFFFFFFFFFFFFFFF:FFFFFFFF  
@A00155:342:HHGFNDSXY:1:2526:27163:19507 1:N:0:GAACCTAG+TCCGCATA  
AGAGAGCGACTTCTCTCGGGCCCACAGCCTTACAGCTGTGGAGCACGGTATCCTCTGCCGAAACAGAG  
GTTGGACAAGACCGGAGGGGTCTCCTAGTTCAAAGGAGATGTACTCCGGGCTTGTTTCACGACCTACC  
+  
FFFFFFFFFFFFFFFFFFFFFFFFFFFFFFFFFFFFFFFFFFFFFFFFFFFFFFFFFFFFFFFFFFFFFFFF  
FFFFFFFFFFFFFFFFFFFFFFFFFFFFFFFFFFFFFFFFFFFFFFFFFFFFFFFFFFFFFFFFFFFFFFFF  
@A00155:342:HHGFNDSXY:1:2526:27407:19711 1:N:0:GAACCTAG+TCCGCATA  
AGAGAGCGACTTCTCTCGGGCCCACAGCCTTACAGCTGTGGAGCACGGTATCCTCTGCCGAAACAGAG  
GTTGGACAAGACCGGAGGGGTCTCCTAGTTCAAAGGAGATGTACTCCGGGCTTGTTTCACGACCTACC  
+  
FFFFFFFFFFFFFFFFFFFFFFFFFFFFFFFFFFFFFFFFFFFFFFFFFFFFFFFFFFFFFFFFFFFFFFFF  
FFFFFFFFFFFFFFFFFFFFFFFFFFFFFFFFFFFFFFFFFFFFFFFFFFFFFFFFFFFFFFFFFFFFFFFF  
@A00155:342:HHGFNDSXY:1:2526:3459:28087 1:N:0:GAACCTAG+TCCGCATA  
CTCAATGCCGAGAGGGATGTGGAGGGCGAGAGAGAGCGACTTCTCTCGGGCCCACAGCCTTACAGCTG  
TGGAGCACGGTATCCTCTGCCGAAACAGAGGTTGGACAAGACCGGAGGGGTCTCCTGGTTCAAAGGA  
+
```



FFFFFFFFFFFFFFFFFFFFFFFFFFFFFFFFFFFFFFFFFFFFFFFFFFFFFFFFFFFFFFFFFFFFFFFF  
FFFFFFFFFFFFFFFFFFFFFFFFFFFFFFFFFFFFFFFFFFFFFFFFFFFFFFFFFFFFFFFFFFFFFFFF:FFFFFF  
@A00155:342:HHGFNDSXY:1:2526:19497:36479 1:N:0:GAACCTAG+TCCGCATA  
GAGGGCGAGAGAGAGCGACTTCTCTCGGGCCCACAGCCTTACAGCTGTGGAGCACGGTATCCTCTGCC  
GAAACAGAGGTTGGACAAGACCGGAGGGGTCTCCTGGTTCCAAAGGAGATGTACTCCGGGCTTGTTC  
+  
FFFFF:FFFFFFFFFFFFFFFFFFFFFFFFFFFFFFFFFFFFFFFFFFFFFFFFFFFFFFFFFFFFFFFF  
FFFFFFFFFFFFFFFFFFFFFFFFFFFFFFFFFFFFFFFFFFFFFFFFFFFFFFFFFFFFFFFFFFFFFFFF  
@A00155:342:HHGFNDSXY:1:2527:28456:5368 1:N:0:GAACCTAG+TCCGCATA  
ACCTCTGTTTCGGCAGAGGATACCGTGCTCCACAGCTGTAAGGCTGTGGGCCCCGAGAGAAGTCGCTCT  
CTCTCGCCCTCCACATCCCTCTCGGCATTGAGATGACCATAGGCCAGAGGAGAGTCCTTAAGTGGACA  
+  
FFF:F:FFFFFFFFFFFFFFFFFFFFFFFFFFFFFFFFFFFFFFFFFFFFFFFFFFFFFFFFFFFFFFFF:FFF  
FFFFFFFFFFFFFFFFFFFFFFFFFFFFFFFFFFFFFFFFFFFFFFFFFFFFFFFFFFFFFFFFFFFFFFFF,FFFFFF  
@A00155:342:HHGFNDSXY:1:2527:22824:15060 1:N:0:GAACCTAG+TCCGCATA  
GAGAGGGATGTGGAGGGCGAGAGAGAGCGACTTCTCTCGGGCCCACAGCCTTACAGCTGTGGAGCACG  
GTATCCTCTGCCGAAACAGAGGTTGGACAAGACCGGAGGGGTCTCCTAGTTCCAAAGGAGATGTACTC  
+  
FFFFFFFFFFFFFFFFFFFFFFFFFFFFFFFFFFFFFFFFFFFFFFFFFFFFFFFFFFFFFFFFFFFFFFFF:FFF  
FFFFFFFFFFFFFFFFFFFFFFFFFFFFFFFFFFFFFFFFFFFFFFFFFFFFFFFFFFFFFFFFFFFFFFFF  
@A00155:342:HHGFNDSXY:1:2527:9281:15718 1:N:0:GAACCTAG+TCCGCATA  
GCGACTTCTCTCGGGCCCACAGCCTTACAGCTGTGGAGCACGGTATCCTCTGCCGAAACAGAGGTTGG  
ACAAGACCGGAGGGGTCTCCTGGTTCCAAAGGAGATGTACTCCGGGCTTGTTCACGACCTACCGTGTA  
+  
FFFFF::FFFFF,FFFFFFFFF:FFFFF:FFFFFFFFFFFFFFFFFFFFFFFFFFFFFFFF:FFFFFFFFF:FF,,  
FFFF:FF:F:FF:FFFF:F,:FFFF:FFFF:FFFFFFFFF:F,FFFFFFFF:FF,FFFFFFFF,FFF  
@A00155:342:HHGFNDSXY:1:2527:10755:17331 1:N:0:GAACCTAG+TCCGCATA  
GTATCTTCTGCCGAAACAGAGGTTGGACAAGACCGGAGGGGTCTCCTAGTTCCAAAGGAGATGTACTC  
CGGGCTTGTTCACGACCTACCGTGTAAGTCGTAGTCTAGTAGGCTACCTGACGAGTCCTTTTATAGGAC  
+  
FFFFFFFFFFFFFFFFFFFFFFFFFFFFFFFFFFFFFFFFFFFFFFFFFFFFFFFFFFFFFFFFFFFFFFFF  
FFFFFFFFFFFFFFFFFFFFFFFFFFFFFFFFFFFFFFFFFFFFFFFFFFFFFFFFFFFFFFFFFFFFFFFF:FFFFFF  
@A00155:342:HHGFNDSXY:1:2527:15248:18818 1:N:0:GAACCTAG+TCCGCATA  
TAGATCAGCTGTGTCCACTTAAGGACTCACCTCTGGCCTATGGTCATCTCAATGCCGAGAGGGATGTA  
GAGGGCGAGAGAGAGCGACTTCTCTCGGGCCCACAGCCTTACAGCTGTGGAGCACGGTATCCTCTGCC  
+  
FFFFFFFFFFFFFFFFFFFFFFFFFFFFFFFFFFFFFFFFFFFFFFFFFFFFFFFFFFFFFFFFFFFFFFFF  
FFFFFFFFFFFFFFFFFFFFFFFFFFFFFFFFFFFFFFFFFFFFFFFFFFFFFFFFFFFFFFFFFFFFFFFF  
@A00155:342:HHGFNDSXY:1:2527:8043:27571 1:N:0:GAACCTAG+TCCGCATA  
GAGAGGGATGTGGAGGGCGAGAGAGAGCGACTTCTCTCGGGCCCACAGCCTTACAGCTGTGGAGCACG  
GTATCCTCTGCCGAAACAGAGGTTGGACAAGACCGGAGGGGTCTCCTAGTTCCAAAGGAGATGTACTC  
+  
FFFFFFFFFFFFFFFFFFFFFFFFFFFFFFFFFFFFFFFFFFFFFFFFFFFFFFFFFFFFFFFFFFFFFFFF  
FFFFFFFFFFFFFFFFFFFFFFFFFFFFFFFFFFFFFFFFFFFFFFFFFFFFFFFFFFFFFFFFFFFFFFFF:FFF  
@A00155:342:HHGFNDSXY:1:2527:3441:30530 1:N:0:GAACCTAG+TCCGCATA  
ATCTCAATGCCGAGAGGGATGTGGAGGGCTAGAGAGAGCGACTTCTCTCGGGCCCACAGCCTTACAGC  
TGTGGAGCACGGTATCCTCTGCCGAAACAGAGGTTGGACAAGACCGGAGGGGTCTCCTAGTTCCAAAG  
+  
FFFFFFFFFFFFFFFFFFFFFFFFFFFFFFFFFFFFFFFFFFFFFFFFFFFFFFFFFFFFFFFFFFFFFFFF  
FFFFFFFFFFFFFFFFFFFFFFFFFFFFFFFFFFFFFFFFFFFFFFFFFFFFFFFFFFFFFFFFFFFFFFFF  
@A00155:342:HHGFNDSXY:1:2527:2211:30655 1:N:0:GAACCTAG+TCCGCATA  
ATCTCAATGCCGAGAGGGATGTGGAGGGCTAGAGAGAGCGACTTCTCTCGGGCCCACAGCCTTACAGC  
TGTGGAGCACGGTATCCTCTGCCGAAACAGAGGTTGGACAAGACCGGAGGGGTCTCCTAGTTCCAAAG  
+

FFFFFFFFFFFFFFFF:FFFFFFFFFFFF,FFFFFFFFFFFFFFFFFFFFFFFFFFFFFFFF:FFFFFFFFF  
FFFFFFFF:FF:FFFFFFFFFFFFFFFFFFFFFFFFFFFFFFFFFFFFFFFF,FFFFFFFFFFFFF:FFFFFFFFFFFF  
@A00155:342:HHGFNDSXY:1:2527:10908:31156 1:N:0:GAACCTAG+TCCGCATA  
CATAGGCCAGAGGTGAGTCCTTAAGTGGACACAGCTGATCTAAGGCGGTGTGGTGGGGCATGGGTTTG  
AACCCCATGACGGTCGGAGTCTAGTAGGCTCCCTGATGAGTCCGTTCCAAGGACGAAACCGTCGTTA  
+  
FFFFFFFFFFFFFFFFFFFFFFFFFFFFFFFFFFFFFFFFFFFFFFFFFFFFFFFFFFFFFFFFFFFFF  
FFFFFFFFFFFFFFFFFFFFFFFFFFFFFFFFFFFFFFFFFFFFFFFFFFFFFFFFFFFFFFFFFFFFF  
@A00155:342:HHGFNDSXY:1:2528:12789:9862 1:N:0:GAACCTAG+TCCGCATA  
ACCTCTGTTTCGGCAGAGGATACCGTGCTCCACAGCTGTAAGGCTGTGGGCCCGAGAGAAGTCGCTCT  
CTCTCGCCCTTACATCCCTCTCGGCATTGAGATGACCATAGGCCAGAGGTGAGTCCTTAAGTGGAC  
+  
FFFFFFFFFFFFFFFFFFFFFFFFFFFFFFFFFFFFFFFFFFFFFFFFFFFFFFFFFFFFFFFFFFFFF  
FFFFFFFFFFFFFFFFFFFFFFFFFFFFFFFFFFFFFFFFFFFFFFFFFFFFFFFFFFFFFFFFFFFFF  
@A00155:342:HHGFNDSXY:1:2528:19849:10316 1:N:0:GAACCTAG+TCCGCATA  
AGAGAGAGCGACTTCTCTCGGGCCACAGCCTTACAGCTGTGGAGCACGGTATCCTCTGCCGAAACAG  
AGGTTGACAAGACCGGAGGGGTCTCCTAGTTCCAAAGGAGATGTACTCCGGGCTTGTTACG  
+  
FFFFFFFFFFFFFFFFFFFFFFFFFFFFFFFFFFFFFFFFFFFFFFFFFFFFFFFFFFFFFFFFFFFFF  
FFFFFFFFFFFFFFFFFFFFFFFFFFFFFFFFFFFFFFFFFFFFFFFFFFFFFFFFFFFFFFFFFFFFF  
@A00155:342:HHGFNDSXY:1:2528:19325:20619 1:N:0:GAACCTAG+TCCGCATA  
GTCCACTTAAGGACTCACCTCTGGCCTATGGTCATCTCAATGCCGAGAGGGATGTGAAGGGCGAGAGA  
GAGCGACTTCTCTCGGGCCACAGCCTTACAGCTGTGGAGCACGGTATCCTCTGCCGAAACAGAGGTT  
+  
FFFFFFFFFFFFFFFFFFFFFFFFFFFFFFFFFFFFFFFFFFFFFFFFFFFFFFFFFFFFFFFFFFFFF  
FFFFFFFFFFFFFFFFFFFFFFFFFFFFFFFFFFFFFFFFFFFFFFFFFFFFFFFFFFFFFFFFFFFFF  
@A00155:342:HHGFNDSXY:1:2528:19596:23657 1:N:0:GAACCTAG+TCCGCATA  
GTCCACTTAAGGACTCACCTCTGGCCTATGGTCATCTCAATGCCGAGAGGGATGTGAAGGGCGAGAGA  
GAGCGACTTCTCTCGGGCCACAGCCTTACAGCTGTGGAGCACGGTATCCTCTGCCGAAACAGAGGTT  
+  
FFFFFFFFFFFFFFFFFFFFFFFFFFFFFFFFFFFFFFFFFFFFFFFFFFFFFFFFFFFFFFFFFFFFF  
FFFFFFFFFFFFFFFFFFFFFFFFFFFFFFFFFFFFFFFFFFFFFFFFFFFFFFFFFFFFFFFFFFFFF  
@A00155:342:HHGFNDSXY:1:2529:16333:14685 1:N:0:GAACCTAG+TCCGCATA  
ACCTCTGTTTCGGCAGAGGATACCGTGCTCCACAGCTGTAAGGCTGTGGGCCCGAGAGAAGTCGCTCT  
CTCTCGCCCTCCACATCCCTCTCGGCATTGAGATGACCATAGGCCAGAGGAGAGTCCTTAAGTGGACA  
+  
FFFFFFFFFFFFFFFFFFFFFFFFFFFFFFFFFFFFFFFFFFFFFFFFFFFFFFFFFFFFFFFFFFFFF  
FFFFFFFFFFFFFFFFFFFFFFFFFFFFFFFFFFFFFFFFFFFFFFFFFFFFFFFFFFFFFFFFFFFFF  
@A00155:342:HHGFNDSXY:1:2529:18349:20243 1:N:0:GAACCTAG+TCCGCATA  
GGATGTGGAGGGCGAGAGAGAGCGACTTCTCTCGGGCCACAGCCTTACAGCTGTGGAGCACGGTATC  
CTCTGCCGAAACAGAGGTTGGACAAGACCGGAGGGGTCTCCTGGTTCCAAAGGAGATGTACTCC  
+  
FFFFFFFFFFFFFFFFFFFFFFFFFFFFFFFFFFFFFFFFFFFFFFFFFFFFFFFFFFFFFFFFFFFFF  
FFFFFFFFFFFFFFFFFFFFFFFFFFFFFFFFFFFFFFFFFFFFFFFFFFFFFFFFFFFFFFFFFFFFF  
@A00155:342:HHGFNDSXY:1:2529:8024:29763 1:N:0:GAACCTAG+TCCGCATA  
CTCTGGCCTATGGTCATCTCAATGCCGAGAGGGATGTGAAGGGCGAGAGAGAGCGACTTCTCTCGGGC  
CCACAGCCTTACAGCTGTGGAGCACGGTATCCTCTGCCGAAACAGAGGTTGGACAAGAC  
+  
FFFFFFFFFFFFFFFFFFFFFFFFFFFFFFFFFFFFFFFFFFFFFFFFFFFFFFFFFFFFFFFFFFFFF  
FFFFFFFFFFFFFFFFFFFFFFFFFFFFFFFFFFFFFFFFFFFFFFFFFFFFFFFFFFFFFFFFFFFFF  
@A00155:342:HHGFNDSXY:1:2530:23185:5916 1:N:0:GAACCTAG+TCCGCATA  
AGAGAGAGCGACTTCTCTCGGGCCACAGCCTTACAGCTGTGGAGCACGGTATCCTCTGCCGAAACAG  
AGGTTGACAAGACCGGAGGGGTCTCCTAGTTCCAAAGGAGATGTACTCCGGGCTTGTTACGACCTA  
+

FFFFFFFFFFFFFFFFFFFFFFFF:F,F,:FFFFFFFFFFFFFFFFFFFFFFFFFFFFFFFF:FFFF  
FFFFFFFFFFFFFFFFFFFFFFFFFFFFFFFFFFFFFFFFFFFFFFFFFFFFFFFFFFFFFFFF:FFFFFFFF:FF,FFFFFF:FFF  
@A00155:342:HHGFNDSXY:1:2530:26476:10019 1:N:0:GAACCTAG+TCCGCATA  
ATGCCGAGAGGGATGTAGAGGGCGAGAGAGAGCGACTTCTCTCGGGCCCACAGCCTTACAGCTGTGGA  
GCACGGTATCCTCTGCCGAAACAGAGGTTGGACAAGACCGGAGGGGTCTCCTAGTTCCAAAGGAGATG  
+  
FFFFFFFFFFFFFFFFFFFFFFFFFFFFFFFFFFFFFFFFFFFFFFFFFFFFFFFFFFFFFFFF:FFFFFFFFFFFFFFFFFFFFF  
FFFFFFFF:FFFFFFFFFFFFFFFFFFFFFFFFFFFFFFFFFFFFFFFFFFFFFFFFFFFFFFFFFFFFFFFFFFFFFFFF  
@A00155:342:HHGFNDSXY:1:2530:14769:26600 1:N:0:GAACCTAG+TCCGCATA  
TGTCCACTTAAGGACTCACCTCTGGCCTATGGTCATCTCAATGCCGAGAGGGATGTAGAGGGCGAGAG  
AGAGCGACTTCTCTCGGGCCCACAGCCTTACAGCTGTGGAGCACGGTATCCTCTGCCGAAACAGAGGT  
+  
FFFFFFFFFFFFFFFFFFFFFFFFFFFFFFFFFFFFFFFFFFFFFFFFFFFFFFFFFFFFFFFFFFFFFFFFFFFFFFFF  
FFFFFFFFFFFFFFFFFFFFFFFFFFFFFFFFFFFFFFFFFFFFFFFFFFFFFFFFFFFFFFFFFFFFFFFFFFFFFFFF  
@A00155:342:HHGFNDSXY:1:2530:2410:32033 1:N:0:GAACCTAG+TCCGCATA  
CTCAATGCCGAGAGGGATGTGGAGGGCGAGAGAGAGCGACTTCTCTCGGGCCCACAGCCTTACAGCTG  
TGGAGCACGGTATCCTCTGCCGAAACAGAGGTTGGACAAGACCGGAGGGGTCTCCTAGTTCCAAAGGA  
+  
FFFFFFFFFFFFFFFFFFFFFFFF:FFFFFFFFFFFFFFFFFFFFFFFF:FFFFFFFFFFFFFFFFFFFFFFFFFFFFF  
FFFFFFFFFFFFFFFFFFFFFFFFFFFFFFFFFFFFFFFFFFFFFFFFFFFFFFFFFFFFFFFFFFFFFFFFFFFFF  
@A00155:342:HHGFNDSXY:1:2531:27010:4711 1:N:0:GAACCTAG+TCCGCATA  
AGAGGGATGTGGAGGGCGAGAGAGAGCGACTTCTCTCGGGCCCACAGCCTTACAGCTGTGGAGCACGG  
TATCCTCTGCCGAAACAGAGGTTGGACAAGACCGGAGGGGTCTCCTAGTTCCAAAGGAGAT  
+  
FFFFFFFFF:::FFFFFF:FF:FFF:FFF:FF,F,FFFF:F,:FFFFFF:FFFFFFFFFFFF:FFFFFFFFF  
FFFFFFFF:F:F::F:FF:F:FF:FFFFFFFFF:FFFF:FFFFFFFFFFFF:FFFFFFFFFFFF  
@A00155:342:HHGFNDSXY:1:2532:8657:1297 1:N:0:GAACCTAG+TCCGCATA  
GGATGTGGAGGGCGAGAGAGAGCGACTTCTCTCGGGCCCACAGCCTTACAGCTGTGGAGCACGGTATC  
CTCTGCCGAAACAGAGGTTGGACAAGACCGGAGGGGTCTCCTAGTTCCAAAGGAGATGTACTCC  
+  
FFFFFFFFFFFFFFFFFFFFFFFFFFFFFFFFFFFFFFFFFFFFFFFFFFFFFFFFFFFFFFFFFFFFFFFFFFFFF  
FFFFFFFFFFFFFFFFFFFFFFFFFFFFFFFFFFFFFFFFFFFFFFFFFFFFFFFFFFFFFFFFFFFFFFFFFFFF  
@A00155:342:HHGFNDSXY:1:2532:19651:4272 1:N:0:GAACCTAG+TCCGCATA  
CGAGAGGGATGTAGAGGGCGAGAGAGAGCGACTTCTCTCGGGCCCACAGCCTTACAGCTGTGGAGCAC  
GGTATCCTCTGCCGAAACAGAGGTTGGACAAGACCGGAGGGGTCTCCTAGTTCCAAAGGAGATGTACT  
+  
FFFFFFFFF:FFFFFFFFFFFFFFFFFFFFFFFFFFFFFFFFFFFFFFFFFFFFFFFFFFFFFFFFFFFFFFFFFFFF  
FF:FFFFFFFFFFFFFFFFFFFF,FFFFFFFFF:FFFFFFFFFFFFFFFFFFFFFFFFFFFFFFFFFFFFFFFFFFFF  
@A00155:342:HHGFNDSXY:1:2532:3079:15468 1:N:0:GAACCTAG+TCCGCATA  
TGCCGAGAGGGATGTGTAGGGCGAGAGAGAGCGACTTCTCTCGGGCCCACAGCCTTACAGCTGTGGAG  
CACGGTATCCTCTGCCGAAACAGAGGTTGGACAAGACCGGAGGGGTCTCCTAGTTCCAAAGGAGATGT  
+  
FFFFFFFFFFFFFFFFFFFFFFFFFFFFFFFFFFFFFFFFFFFFFFFFFFFFFFFFFFFFFFFFFFFFFFFFFFFFF  
FFFFFFFFFFFFFFFFFFFFFFFFFFFFFFFFFFFFFFFFFFFFFFFFFFFFFFFFFFFFFFFFFFFFFFFFFFFF  
@A00155:342:HHGFNDSXY:1:2532:30508:19664 1:N:0:GAACCTAG+TCCGCATA  
TTCTCTCGGGCCCACAGCCTTACAGCTGTGGAGCACGGTATCCTCTGCCGAAACAGAGGTTGGACAAG  
ACCGGAGGGGTCTCCTAGTTCCAAAGGAGATGTACTCCGGGCTTGTTACGACCTACCGTGTAAGTCG  
+  
FFFFFFFFFFFFFFFFFFFFFFFFFFFFFFFFFFFFFFFFFFFFFFFFFFFFFFFFFFFFFFFFFFFFFFFFFFFFF  
FFFFFFFFFFFFFFFFFFFF:FFFFFFFFFFFFFFFFFFFFFFFFFFFFFFFFFFFF,FFFFFFFFFFFFFFFFF:  
@A00155:342:HHGFNDSXY:1:2532:7591:22748 1:N:0:GAACCTAG+TCCGCATA  
TAGTCTAGTAGGCTACCTGACGAGTCCTTTTTAGGACGAAACTTACACAACCTCGAAGAGTAACGACGG  
TTTCGTCCTTGGAACGGACTCATCAGGGAGCCTACTAGACTCCGACCGTCATGGGGGTTCAAACCCAT  
+

[illegible]

```

FFFFFFFFFFFFFFFFFFFFFFFFFFFFFFFFFFFFFFFFFFFFFFFFFFFFFFFFFFFFFFFFFFFFFFFFF:FFFFFFFFFFFFFFFFFFFFF
FFFFFFFFFFFFFFFFFFFFFFFFFFFFFFFFFFFFFFFFFFFFFFFFFFFFFFFFFFFFFFFFFFFFFFFFF
@A00155:342:HHGFNDSXY:1:2535:12915:17910 1:N:0:GAACCTAG+TCCGCATA
CTGTGTCCACTTAAGGACTCACCTCTGGCCTATGGTCATCTCAATGCCGAGAGGGATGTGGAGGGCGA
GAGAGAGCGACTTCTCTCGGGCCCACAGCCTTACAGCTGTGGAGCACGGTATCCTCTGCCGAAACAGA
+
FFFFFFFFFFFFFFFFFFFFFFFFFFFFFFFFFFFFFFFFFFFFFFFFFFFFFFFFFFFFFFFFFFFFFFFFF:FFFFFFFFFFFFFFFFF
FFFFFFFFFFFFFFFFFFFFFFFFFFFFFFFFFFFFFFFFFFFFFFFFFFFFFFFFFFFFFFFFFFFFFFFFF
@A00155:342:HHGFNDSXY:1:2535:31051:18411 1:N:0:GAACCTAG+TCCGCATA
CGACTTCTCTCGGGCCCACAGCCTTACAGCTGTGGAGCACGGTATCCTCTGCCGAAACAGAGGTTGGA
CAAGACCGGAGGGGTCTCCTGGTTCCAAAGGAGATGTACTCCGGGCTTGTTACAGACCTACCGTGTA
+
FFFFFFFFFFFFFFFFFFFFFFFFFFFFFFFFFFFFFFFFFFFFFFFFFFFFFFFFFFFFFFFFFFFFFFFFF:FFFFFFFFFFFFFFFFF:FFFFFFFFFFFFF:FFFFFFFFFFFFF
FFFFFFFFFFFFFFFFFFFFFFFFFFFFFFFFFFFFFFFFFFFFFFFFFFFFFFFFFFFFFFFFFFFFFFFFF
@A00155:342:HHGFNDSXY:1:2535:30327:18599 1:N:0:GAACCTAG+TCCGCATA
CGACTTCTCTCGGGCCCACAGCCTTACAGCTGTGGAGCACGGTATCCTCTGCCGAAACAGAGGTTGGA
CAAGACCGGAGGGGTCTCCTGGTTCCAAAGGAGATGTACTCCGGGCTTGTTACAGACCTACCGTGTA
+
FFFFFFFFFFFFFFFFFFFFFFFFFFFFFFFFFFFFFFFFFFFFFFFFFFFFFFFFFFFFFFFFFFFFFFFFF:FFFFFFFFFFFFFFFFF:FFFFFFFFFFFFF:FFFFFFFFFFFFF
FFFFFFFFFFFFFFFFFFFFFFFFFFFFFFFFFFFFFFFFFFFFFFFFFFFFFFFFFFFFFFFFFFFFFFFFF
@A00155:342:HHGFNDSXY:1:2535:18484:19445 1:N:0:GAACCTAG+TCCGCATA
CAGCCTTACAGCTGTGGAGCACGGTATCCTCTGCCGAAACAGAGGTTGGACAAGACCGGAGGGGTCTC
CTAGTTCCAAAGGAGATGTACTCCGGGCTTGTTACAGACCTACCGTGTAAGTCGTAGTCTAGTAGGCT
+
FFFFFFFFFFFFFFFFFFFFFFFFFFFFFFFFFFFFFFFFFFFFFFFFFFFFFFFFFFFFFFFFFFFFFFFFF:FFFFFFFFFFFFFFFFF
FFFFFFFFFFFFFFFFFFFFFFFFFFFFFFFFFFFFFFFFFFFFFFFFFFFFFFFFFFFFFFFFFFFFFFFFF
@A00155:342:HHGFNDSXY:1:2535:11080:20087 1:N:0:GAACCTAG+TCCGCATA
CTGTGTCCACTTAAGGACTCACCTCTGGCCTATGGTCATCTCAATGCCGAGAGGGATGTGGAGGGCGA
GAGAGAGCGACTTCTCTCGGGCCCACAGCCTTACAGCTGTGGAGCACGGTATCCTCTGCCGAAACAGA
+
FFFFFFFFFFFFFFFFFFFFFFFFFFFFFFFFFFFFFFFFFFFFFFFFFFFFFFFFFFFFFFFFFFFFFFFFF:FFFFFFFFFFFFFFFFF
FFFFFFFFFFFFFFFFFFFFFFFFFFFFFFFFFFFFFFFFFFFFFFFFFFFFFFFFFFFFFFFFFFFFFFFFF
@A00155:342:HHGFNDSXY:1:2535:14805:23813 1:N:0:GAACCTAG+TCCGCATA
CACCTCTGGCCTATGGTCATCTCAATGCCGAGAGGGATGTGAAGGGCGAGAGAGAGCGACTTCTCTCG
GGCCCACAGCCTTACAGCTGTGGAGCACGGTATCCTCTGCCGAAACAGAGGTTGGACAAGACCGGAG
+
F:FFFFFFFFFFFFFFFFFFFFFFFFFFFFFFFFFFFFFFFFFFFFFFFFFFFFFFFFFFFFFFFFFFFFFFFFF
FFFFFFFFFFFFFFFFFFFFFFFFFFFFFFFFFFFFFFFFFFFFFFFFFFFFFFFFFFFFFFFFFFFFFFFFF
@A00155:342:HHGFNDSXY:1:2535:22209:28213 1:N:0:GAACCTAG+TCCGCATA
CTCTCGCCCTCCACATCCCTCTCGGCATTGAGATGACCATAGGCCAGAGGTGAGTCCTTAAGTGGACA
CAGCTGATCTAAGGCGGTGTGGCGGGGCATGGGTTTGAACCCCCATGACGGTCGGAGTCTAGTAGGCT
+
FFFFFFFFFFFFFFFFFFFFFFFFFFFFFFFFFFFFFFFFFFFFFFFFFFFFFFFFFFFFFFFFFFFFFFFFF:FFFFFFFFFFFFFFFFF
FFFFFFFFFFFFFFFFFFFFFFFFFFFFFFFFFFFFFFFFFFFFFFFFFFFFFFFFFFFFFFFFFFFFFFFFF
@A00155:342:HHGFNDSXY:1:2535:6560:32362 1:N:0:GAACCTAG+TCCGCATA
GAGGGCGAGAGAGAGCGACTTCTCTCGGGCCCACAGCCTTACAGCTGTGGAGCACGGTATCCTCTGCC
GAAACAGAGGTTGGACAAGACCGGAGGGGTCTCCTAGTTCCAAAGGAGATGTACTCCGGGCTTGTTCA
+
FFFFFFFFFFFFFFFFFFFFFFFFFFFFFFFFFFFFFFFFFFFFFFFFFFFFFFFFFFFFFFFFFFFFFFFFF:FFFFFFFFFFFFFFFFF
FFFFFFFFFFFFFFFFFFFFFFFFFFFFFFFFFFFFFFFFFFFFFFFFFFFFFFFFFFFFFFFFFFFFFFFFF
@A00155:342:HHGFNDSXY:1:2536:16468:7686 1:N:0:GAACCTAG+TCCGCATA
TATCCTCTGCCGAAACAGAGGTTGGACAAGACCGGAGGGGTCTCCTAGTTCCAAAGGAGATGTACTCC
GGGCTTGTTACAGACCTACCGTGTAAGTCGTAGTCTAGTAGGCTACCTGACGAGTCCTTTTTAGGAC
+

```

[illegible]

FFF,FFFFFFFF:FFFF,FFFFFFFFFFFFFFFFFFFFFFFF:FFFF:FFFFFFFFFFFFFFFF:FFFF,F  
FFFFFFFFFFFFFFFFFFFFFFFFFFFFFFFFFFFFFFFF,FFF:FFF:FF:FFFFFFFFFFFFFF,FFFFFFFFFFFF  
@A00155:342:HHGFNDSXY:1:2539:7229:12070 1:N:0:GAACCTAG+TCCGCATA  
AAGGACTCTCCTCTGGCCTATGGTCATCTCAATGCCGAGAGGGATGTGGAGGGCGAGAGAGAGCGACT  
TCTCTCGGGCCACAGCCTTACAGCTGTGGAGCACGGTATCCTCTGCCGAAACAGAGGTTGGACAAGA  
+  
FFFFFFFFFFFFFFFFFFFFFFFFFFFFFFFFFFFFFFFF:FFFFFFFFFFFFFFFF:FF  
FFFFFFFFFFFFFFFFFFFFFFFFFFFFFFFFFFFFFFFF:FFFFFFFFFFFF:FFF:FFFFFFFFFFFF  
@A00155:342:HHGFNDSXY:1:2539:2211:16752 1:N:0:GAACCTAG+TCCGCATA  
CAGCCTTACAGCTGTGGAGCACGGTATCCTCTGCCGAAACAGAGGTTGGACAAGACCGGAGGGGTCTC  
CTAGTTCCAAAGGAGATGTACTCCGGGCTTGTTACAGACCTACCGTGTAAAGTCGTAGTCTAGTAGGCT  
+  
FFFFFFFFFFFFFFFFFFFFFFFFFFFFFFFFFFFFFFFFFFFFFFFFFFFFFFFFFFFFFFFFFFFFFFFF  
FFFFFFFFFFFFFFFFFFFFFFFFFFFFFFFFFFFFFFFFFFFFFFFFFFFFFFFFFFFFFFFFFFFFFFFF:FF  
@A00155:342:HHGFNDSXY:1:2539:11586:35243 1:N:0:GAACCTAG+TCCGCATA  
GAGCGACTTCTCTCGGGCCACAGCCTTACAGCTGTGGAGCACGGTATCCTCTGCCGAAACAGAGGTT  
GGACAAGACCGGAGGGGTCTCCTAGTTCCAAAGGAGATGTACTCCGGGCTTGTTACAGACCTACCGTG  
+  
FFFFFFFFFFFFFFFFFFFFFFFFFFFFFFFFFFFFFFFFFFFFFFFFFFFFFFFFFFFFFFFFFFFFFFFF  
FFFFFFFFFFFFFFFFFFFFFFFFFFFFFFFFFFFFFFFF:FFFFFFFFFFFFFFFFFFFFFFFFFFFFFFFFFFFF  
@A00155:342:HHGFNDSXY:1:2540:25572:16814 1:N:0:GAACCTAG+TCCGCATA  
GGATGTGGAGGGCGAGAGAGAGCGACTTCTCTCGGGCCACAGCCTTACAGCTGTGGAGCACGGTATC  
CTCTGCCGAAACAGAGGTTGGACAAGACCGGAGGGGTCTCCTAGTTCCAAAGGAGATGTACTCC  
+  
FFFFFFFFFFFFFFFFFFFFFFFFFFFFFFFFFFFFFFFFFFFFFFFFFFFFFFFFFFFFFFFFFFFFFFFF  
FFFFFFFFFFFFFFFFFFFFFFFFFFFFFFFFFFFFFFFFFFFFFFFFFFFFFFFFFFFFFFFFFFFFFFFF  
@A00155:342:HHGFNDSXY:1:2540:20880:18427 1:N:0:GAACCTAG+TCCGCATA  
GCGACTTCTCTCGGGCCACAGCCTTACAGCTGTGGAGCACGGTATCCTCTGCCGAAACAGAGGTTGG  
ACAAGACCGGAGGGGTCTCCTAGTTCCAAAGGAGATGTACTCCGGGCTTGTTACAGACCTACCGTGTA  
+  
FFFFFFFFFFFFFFFFFFFFFFFFFFFFFFFF:FFFFFFFFFFFFFFFFFFFFFFFFFFFFFFFFFFFFFFFF  
FFFFFFFFFFFFFFFFFFFFFFFFFFFFFFFFFFFFFFFFFFFFFFFFFFFFFFFFFFFFFFFFFFFFFFFF  
@A00155:342:HHGFNDSXY:1:2540:20835:18630 1:N:0:GAACCTAG+TCCGCATA  
GCGACTTCTCTCGGGCCACAGCCTTACAGCTGTGGAGCACGGTATCCTCTGCCGAAACAGAGGTTGG  
ACAAGACCGGAGGGGTCTCCTAGTTCCAAAGGAGATGTACTCCGGGCTTGTTACAGACCTACCGTGTA  
+  
FFFFFFFFFFFFFFFFFFFFFFFFFFFFFFFFFFFFFFFFFFFFFFFFFFFFFFFFFFFFFFFFFFFFFFFF:FF  
FFFFFFFFFFFFFFFFFFFFFFFFFFFFFFFFFFFFFFFFFFFFFFFFFFFFFFFFFFFFFFFFFFFFFFFF:FFF  
@A00155:342:HHGFNDSXY:1:2541:23791:3020 1:N:0:GAACCTAG+TCCGCATA  
ATCTCAATGCCGAGAGGGATGTGGAGGGCGAGAGAGAGCGACTTCTCTCGGGCCACAGCCTTACAGC  
TGTGGAGCACGGTATCCTCTGCCGAAACAGAGGTTGGACAAGACCGGAGGGGTCTCCTAGTTCCAAAG  
+  
FFFFFFFFFFFFFFFFFFFFFFFFFFFFFFFFFFFFFFFFFFFFFFFFFFFFFFFFFFFFFFFFFFFFFFFF,FFFF  
FFFFFFFFFFFFFFFFFFFFFFFFFFFFFFFFFFFFFFFFFFFFFFFFFFFFFFFFFFFFFFFFFFFFFFFF  
@A00155:342:HHGFNDSXY:1:2541:16785:5165 1:N:0:GAACCTAG+TCCGCATA  
GAGCGACTTCTCTCGGGCCACAGCCTTACAGCTGTGGAGCACGGTATCCTCTGCCGAAACAGAGGTT  
GGACAAGACCGGAGGGGTCTCCTAGTTCCAAAGGAGATGTACTCCGGGCTTGTTACAGACCTACCGTG  
+  
FFFFFFFFFFFFFFFFFFFFFFFFFFFFFFFFFFFFFFFFFFFFFFFFFFFFFFFFFFFFFFFFFFFFFFFF  
FFFFFFFFFFFFFFFFFFFFFFFFFFFFFFFFFFFFFFFFFFFFFFFFFFFFFFFFFFFFFFFFFFFFFFFF:FFFF  
@A00155:342:HHGFNDSXY:1:2541:20573:17738 1:N:0:GAACCTAG+TCCGCATA  
GAGAGAGCGACTTCTCTCGGGCCACAGCCTTACAGCTGTGGAGCACGGTATCCTCTGCCGAAACAGA  
GGTTGGACAAGACCGGAGGGGTCTCCTAGTTCCAAAGGAGATGTACTCCGGGCTTGTTACAGACCTA  
+

F::F,:FFFFFF:FFFF::FFFF,FFF:FF:,F:F,FF:FFF:FFFFFFFF:FF:FF,F:FFFFFF:F  
:,FFFFFF,FFFFFF:F,,,:FF,,, :FFFFFFFF:F:FF:FF:FF,FF:F,,,:FF:F:FFFF:  
@A00155:342:HHGFNDSXY:1:2541:28140:20948 1:N:0:GAACCTAG+TCCGCATA  
CCTTACAGCTGTGGAGCACGGTATCCTCTGCCGAAACAGAGGTTGGACAAGACCGGAGGGGTCTCCTA  
GTTCCAAAGGAGATGTACTCCGGGCTTGTTACGACCTACCGTGTAAGTCGTAGTCTAGTAGGCTACC  
+  
FFFFFFFFFFFFFFFFFFFFFFFFFFFFFFFFFFFFFFFFFFFFFFFFFFFFFFFFFFFFFFFFFFFFFFFF  
FFFFFFFFFFFFFFFFFFFFFFFFFFFFFFFFFFFFFFFFFFFFFFFFFFFFFFFFFFFFFFFFFFFFFFFF  
@A00155:342:HHGFNDSXY:1:2541:4209:22623 1:N:0:GAACCTAG+TCCGCATA  
ACAGCTGTGGAGCACGGTATCCTCTGCCGAAACAGAGGTTGGACAAGACCGGAGGGGTCTCCTGGTTC  
CAAAGGAGATGTACTCCGGGCTTGTTACGACCTACCGTGTAAGTCGTAGTCTAGTAGGCTACCTGAC  
+  
FFFFFFFFFFFFFFFFFFFFFFFFFFFFFFFFFFFFFFFFFFFFFFFF:F:FFFFFFFFFFFFFFFF:FFF  
FFF:FFFFFFFFFFFFFFFFFFFFFFFFFFFFFFFFFFFFFFFFFFFFFFFFFFFFFFFFFFFFFFFFFFFF  
@A00155:342:HHGFNDSXY:1:2542:7301:6684 1:N:0:GAACCTAG+TCCGCATA  
GAGAGGGATGTAGAGGGCGAGAGAGAGCGACTTCTCTCGGGCCACAGCCTTACAGCTGTGGAGCACG  
GTATCCTCTGCCGAAACAGAGGTTGGACAAGACCGGAGGGGTCTCCTAGTTCCAAAGGAGATGTACTC  
+  
FFFFFFFFFFFFFFFFFFFFFFFFFFFFFFFFFFFFFFFFFFFFFFFFFFFFFFFFFFFFFFFFFFFFFFFF  
FF:FFFFFFFFFFFFFFFFFFFFFFFFFFFFFFFFFFFFFFFFFFFFFFFFFFFFFFFFFFFFFFFFFFFF  
@A00155:342:HHGFNDSXY:1:2542:32832:16078 1:N:0:GAACCTAG+TCCGCATA  
TGCCGAGAGGGATGTGGAGGGCGAGAGAGAGCGACTTCTCTCGGGCCACAGCCTTACAGCTGTGGAG  
CACGGTATCCTCTGCCGAAACAGAGGTTGGACAAGACCGGAGGGGTCTCCTGGTTCCAAAGGAGAT  
+  
FFFFFFFFFFFFFFFFFFFFFFFFFFFFFFFFFFFFFFFF:F:FFFFFFFFFFFFFFFF,FFFFFFFF:FFF  
FFFFFFFFFFFFFFFFFFFFFFFF:FF,:FFFFFFFF:F:FFFFFFFFFFFFFFFFFFFFFFFFFFFFF:  
@A00155:342:HHGFNDSXY:1:2542:11360:22889 1:N:0:GAACCTAG+TCCGCATA  
GGACTCACCTCTGGCCTATGGTCATCTCAATGCCGAGAGGGATGTGGAAGGCGAGAGAGAGCGACTTC  
TCTCGGGCCACAGCCTTACAGCTGTGGAGCACGGTATCCTCTGCCGAAACAGAGGTTGGACAAGACC  
+  
FFFFFFFFFFFFFFFFFFFF:FFFFFFFFFFFFFFFFFFFFFFFFFFFFFFFFFFFFFFFFFFFFFFFFFFFF  
FFFFFFFFFFFFFFFFFFFFFFFFFFFFFFFFFFFFFFFFFFFFFFFFFFFFFFFFFFFFFFFFFFFFFFFF  
@A00155:342:HHGFNDSXY:1:2542:2220:28635 1:N:0:GAACCTAG+TCCGCATA  
ACCTCTGTTTCGGCAGAGGATACCGTGCTCCACAGCTGTAAGGCTGTGGGCCCGAGAGAAGTCGCTCT  
CTCTCGCCCTCCACATCCCTCTCGGCATTGAGATGACCATAGGCCAGAGGTGAGTCCTTAAGTGGACA  
+  
FFFFFFFFFFFFFFFFFFFFFFFFFFFFFFFFFFFFFFFFFFFFFFFFFFFFFFFFFFFFFFFFFFFF:F:FFFFFFFFFFFF  
FFFFFFFFFFFFFFFFFFFFFFFFFFFFFFFFFFFFFFFFFFFFFFFFFFFFFFFFFFFFFFFFFFFFFFFF  
@A00155:342:HHGFNDSXY:1:2542:31096:29951 1:N:0:GAACCTAG+TCCGCATA  
TATCCTCTGCCGAAACAGAGGTTGGACAAGACCGGAGGGGTCTCCTAGTTCCAAAGGAGATGTACTCC  
GGGCTTGTTACGACCTACCGTGTAAGTCGTAGTCTAGTAGGCTACCTGACGAGTCCTTTTAGGACG  
+  
FFFFFFFFFFFFFFFFFFFFFFFFFFFFFFFFFFFFFFFFFFFFFFFFFFFFFFFFFFFFFFFFFFFFF  
FFFFFFFFFFFFFFFFFFFFFFFFFFFF::FFFFFFFFFFFF:FFFFFF:FFFFFF:FFFF,FFFFFFFF  
@A00155:342:HHGFNDSXY:1:2542:13584:32878 1:N:0:GAACCTAG+TCCGCATA  
ACTTCTCTCGGGCCACAGCCTTACAGCTGTGGAGCACGGTATCCTCTGCCGAAACAGAGGTTGGACA  
AGACCGGAGGGGTCTCCTAGTTCCAAAGGAGATGTACTACGGGCTTGTTACGACCTACCGTGTAAGT  
+  
FFFFFFFFF:F:FFFF,FFFFFFFFFFFF:FFFF:FFFF:FFFFFFFFF:FFFFFFFFFFFFFFFF:F  
F:FFF:FFFF,FFFF:FFFFFFFFFFFFFFFF,F,FFF,FFFFFFFFF:FFFFFFFFFFFF:FFFF  
@A00155:342:HHGFNDSXY:1:2542:22236:33238 1:N:0:GAACCTAG+TCCGCATA  
TTACAGCTGTGGAGCACGGTATCCTCTGCCGAAACAGAGGTTGGACAAGACCGGAGGGGTCTCCTAGT  
TCCAAAGGAGATGTACTCCGGGCTTGTTACGACCTACCGTGTAAGTCGTAGTCTAGTAGGCTACCTG  
+



FFFFFFFFFFFFFFFFFFFFFFFFFFFFFFFFFFFFFFFFFFFFFFFFFFFFFFFFFFFFFFFFFFFFFFFF  
FFFFFFFFFFFFFFFFFFFFFFFFFFFFFFFFFFFFFFFFFFFFFFFFFFFFFFFFFFFFFFFFFFFFFFFF  
@A00155:342:HHGFNDSXY:1:2543:27959:4726 1:N:0:GAACCTAG+TCCGCATA  
GCGACTTCTCTCGGGCCCACAGCCTTACAGCTGTGGAGCACGGTATCCTCTGCCGAAACAGAGGTTGG  
ACAAGACCGGAGGGGTCTCCTAGTTCCAAAGGAGATGTACTCCGGGCTTGTTACGACCTACCGTGTA  
+  
FFFFFFFFFFFFFFFFFFFFFFFFFFFFFFFFFFFFFFFFFFFFFFFFFFFFFFFFFFFFFFFFFFFFFFFF  
FFFFFFFFFFFFFFFFFFFFFFFFFFFFFFFFFFFFFFFFFFFFFFFFFFFFFFFFFFFFFFFFFFFFFFFF  
@A00155:342:HHGFNDSXY:1:2543:14000:6386 1:N:0:GAACCTAG+TCCGCATA  
CTGTGTCCACTTAAGGACTCACCTCTGGCCTATGGTCATCTCAATGCCGAGAGGGATGTGGAGGGCGA  
GAGAGAGCGACTTCTCTCGGGCCCACAGCCTTACAGCTGTGGAGCACGGTATCCTCTGCCGAAACAGA  
+  
FFFFFFFFFFFFFFFFFFFFFFFFFFFFFFFFFFFFFFFFFFFFFFFFFFFFFFFFFFFFFFFFFFFFFFFF  
FFFFFFFFFFFFFFFFFFFFFFFFFFFFFFFFFFFFFFFFFFFFFFFFFFFFFFFFFFFFFFFFFFFFFFFF  
@A00155:342:HHGFNDSXY:1:2543:10511:12900 1:N:0:GAACCTAG+TCCGCATA  
CTTCTCTCGGGCCCACAGCCTTACAGCTGTGGAGCACGGTATCCTCTGCCGAAACAGAGGTTGGACAA  
GACCGGAGGGGTCTCCTAGTTCCAAAGGAGATGTACTCCGGGCTTGTTACGACCTACCGTGTAAGTC  
+  
FFFFFFFFFFFFFFFFFFFFFFFFFFFFFFFFFFFFFFFFFFFFFFFFFFFFFFFFFFFFFFFFFFFFFFFF  
FFFFFFFFFFFFFFFFFFFFFFFFFFFFFFFFFFFFFFFFFFFFFFFFFFFFFFFFFFFFFFFFFFFFFFFF  
@A00155:342:HHGFNDSXY:1:2543:18376:18756 1:N:0:GAACCTAG+TCCGCATA  
CTCAATGCCGAGAGGGATGTGGAGGGCGAGAGAGAGCGACTTCTCTCGGGCCCACAGCCTTACAGCTG  
TGGAGCACGGTATCCTCTGCCGAAACAGAGGTTGGACAAGACCGGAGGGGTCTCCTAGTTCCAAAGGA  
+  
FFFFFFFFFFFFFFFFFFFFFFFFFFFFFFFFFFFFFFFFFFFFFFFFFFFFFFFFFFFFFFFFFFFFFFFF  
FFFFFFFFFFFFFFFFFFFFFFFFFFFFFFFFFFFFFFFFFFFFFFFFFFFFFFFFFFFFFFFFFFFFFFFF  
@A00155:342:HHGFNDSXY:1:2543:25482:27336 1:N:0:GAACCTAG+TCCGCATA  
ATCTCAATGCCGAGAGGGATGTAGAGGGCGAGAGAGAGCGACTTCTCTCGGGCCCACAGCCTTACAGC  
TGTGGAGCACGGTATCCTCTGCCGAAACAGAGGTTGGACAAGACCGGAGGGGTCTCCTAGTTCCAAAG  
+  
FFFFFFFFFFFFFFFFFFFFFFFFFFFFFFFFFFFFFFFFFFFFFFFFFFFFFFFFFFFFFFFFFFFFFFFF  
FFFFFFFFFFFFFFFFFFFFFFFFFFFFFFFFFFFFFFFFFFFFFFFFFFFFFFFFFFFFFFFFFFFFFFFF  
@A00155:342:HHGFNDSXY:1:2543:8657:34491 1:N:0:GAACCTAG+TCCGCATA  
CCTCTGTTTCGGCAGAGGATACCGTGCTCCACAGCTGTAAGGCTGTGGGCCCGAGAGAAGTCGCTCTC  
TCTCGCCCTCCACATCCCTCTCGGCATTGAGATGACCATAGGCCAGAGGAGAGTCCTTAAGTGACAC  
+  
FFFFFFFFFFFFFFFFFFFFFFFFFFFFFFFFFFFFFFFFFFFFFFFFFFFFFFFFFFFFFFFFFFFFFFFF  
FFFFFFFFFFFFFFFFFFFFFFFFFFFFFFFFFFFFFFFFFFFFFFFFFFFFFFFFFFFFFFFFFFFFFFFF  
@A00155:342:HHGFNDSXY:1:2544:17219:3035 1:N:0:GAACCTAG+TCCGCATA  
ATCTCAATGCCGAGAGGGATGTGGAGGGCGAGAGAGAGCGACTTCTCTCGGGCCCACAGCCTTACAGC  
TGTGGAGCACGGTATCCTCTGCCGAAACAGAGGTTGGACAAGACCGGAGGGGTCTCCTAGTTCCAAAG  
+  
FFFFFFFFFFFFFFFFFFFFFFFFFFFFFFFFFFFFFFFFFFFFFFFFFFFFFFFFFFFFFFFFFFFFFFFF  
FFFFFFFFFFFFFFFFFFFFFFFFFFFFFFFFFFFFFFFFFFFFFFFFFFFFFFFFFFFFFFFFFFFFFFFF  
@A00155:342:HHGFNDSXY:1:2544:28637:22279 1:N:0:GAACCTAG+TCCGCATA  
ACTTCTCTCGGGCCCACAGCCTTACAGCTGTGGAGCACGGTATCCTCTGCCGAAACAGAGGTTGGACA  
AGACCGGAGGGGTCTCCTGGTTCCAAAGGAGATGTACTCCGGGCTTGTTACGACCTACCGTGTAAGT  
+  
FFFFFFFFFFFFFFFFFFFFFFFFFFFFFFFFFFFFFFFFFFFFFFFFFFFFFFFFFFFFFFFFFFFFFFFF  
FFFFFFFFFFFFFFFFFFFFFFFFFFFFFFFFFFFFFFFFFFFFFFFFFFFFFFFFFFFFFFFFFFFFFFFF  
@A00155:342:HHGFNDSXY:1:2544:16405:35258 1:N:0:GAACCTAG+TCCGCATA  
GGACTCTCCTCTGGCCTATGGTCATCTCAATGCCGAGAGGGATGTGGAGGGCGAGAGAGAGCGACTTC  
TCTCGGGCCCACAGCCTTACAGCTGTGGAGCACGGTATCCTCTGCCGAAACAGAGGTTGGACAAGACC  
+

[illegible]

@A00155:342:HHGFNDSXY:1:2548:26323:22247 1:N:0:GAACCTAG+TCCGCATA  
GGGCGAGAGAGAGCGACTTCTCTCGGGCCACAGCCTTACAGCTGTGGAGCACGGTATCCTCTGCCGA  
AACAGAGGTTGGACAAGACCGGAGGGGTCTCCTAGTTCCAAAGGAGATGTACTCCGGGC

@A00155:342:HHGFNDSXY:1:2548:12038:23343 1:N:0:GAACCTAG+TCCGCATA  
GTATCCTCTGCCGAAACAGAGGTTGGACAAGACCGGAGGGGTCTCCTAGTTCAAAGGAGATGTACTC  
CGGGCTTGTTACGACCTACCGTGTAAGTCGTAGTCTAGTAGGCTACCTGACGAGTCCTTTTTTAGGAC

@A00155:342:HHGFNDSXY:1:2548:18710:28103 1:N:0:GAACCTAG+TCCGCATA  
CTTCTCTCGGGCCACAGCCTTACAGCTGTGGAGCACGGTATCCTCTGCCGAAACAGAGGTTGGACAA  
GACCGGAGGGGTCTCCTAGTTCCAAAGGAGATGTACTCCGGGCTTGTTACAGACCTACCGTGTAAGTC

@A00155:342:HHGFNDSXY:1:2548:6668:31266 1:N:0:GAACCTAG+TCCGCATA  
ACTTCTCTCGGGCCACAGCCTTACAGCTGTGGAGCACGGTATCCTCTGCCGAAACAGAGGTTGGACA  
AGACCGGAGGGGTCTCCTAGTTCCAAAGGAGATGTACTCCGGACTTGTTACGACCTACCGTGTAAGT

@A00155:342:HHGFNDSXY:1:2548:17110:35603 1:N:0:GAACCTAG+TCCGCATA  
AGGGCGAGAGAGAGCGACTTCTCTCGGGCCACAGCCTTACAGCTGTGGAGCACGGTATCCTCTGCCG  
AAACAGAGGTTGGACAAGACCGGAGGGGTCTCCTAGTTCCAAAGGAGATGTACTCCGAGCTTGTTTAC

@A00155:342:HHGFNDSXY:1:2549:16025:11209 1:N:0:GAACCTAG+TCCGCATA  
GAGCGACTTCTCTCGGGCCCACAGCCTTACAGCTGTGGAGCACGGTATCCTCTGCCGAAACAGAGGTT  
GGACAAGACCGGAGGGGTCTCCTAGTTCCAAAGGAGATGTACTCCGGGCTTGTTACGACCTACCGTG

@A00155:342:HHGFNDSXY:1:2549:7690:15029 1:N:0:GAACCTAG+TCCGCATA  
GCGACTTCTCTCGGGCCACAGCCTTACAGCTGTGGAGCACGGTATCCTCTGCCGAAACAGAGGTTGG  
ACAAGACCGGAGGGGTCTCCTAGTTCCAAAGGAGATGTACTCCGGGCTTGTTACGACCTACCGTGTA

@A00155:342:HHGFNDSXY:1:2549:15980:20118 1:N:0:GAACCTAG+TCCGCATA  
AGAGAGAGCGACTTCTCTCGGGCCACAGCCTTACAGCTGTGGAGCACGGTATCCTCTGCCGAAACAG  
AGGTTGGACAAGACCGGAGGGGTCTCTAGTTCCAAAGGAGATGTACTCCGGACTTGTTACAGACCTA

@A00155:342:HHGFNDSXY:1:2550:8431:3004 1:N:0:GAACCTAG+TCCGCATA  
CTTCTCTCGGGCCACAGCCTTACAGCTGTGGAGCACGGTATCCTCTGCCGAAACAGAGGTTGGACAA  
GACCGGAGGGGTCTCCTAGTTCCAAAGGAGATGTACTCCGGGCTTGTTCCACGACCTACCGT

+

@A00155:342:HHGFNDSXY:1:2550:6885:19179 1:N:0:GAACCTAG+TCCGCATA  
GAGCGACTTCTCTCGGGCCCACAGCCTTACAGCTGTGGAGCACGGTATCCTCTGCCGAAACAGAGGTT  
GGACAAGACCGGAGGGGTCTCCTGGTTCCAAAGGAGATGTACTCCGGGCTTGTTACGACCTACCGTG

+

@A00155:342:HHGFNDSXY:1:2550:19831:25911 1:N:0:GAACCTAG+TCCGCATA  
ATGCCGAGAGGGATGTGGAGGGCGAGAGAGAGCGACTTCTCTCGGGCCCACAGCCTTACAGCTGTGGA  
GCACGGTATCCTCTGCCGAAACAGAGGTTGGACAAGACCGGAGGGGTCTCCTGGTTCAAAGGAGATG

+

@A00155:342:HHGFNDSXY:1:2551:19623:5228 1:N:0:GAACCTAG+TCCGCATA  
GGGGCATGGGTTTGAACCCCATGACGGTCGGAGTCTAGTAGGCTCCCTGATGAGTCCGTTCCAAGGA  
CGACACCGTCGTTACTCTTCGAGTTGTGTAAGTTTCGTCCTAAAAAGGACTCGTCAGGT

+

@A00155:342:HHGFNDSXY:1:2551:2682:9392 1:N:0:GAACCTAG+TCCGCATA  
CTTACAGCTGTGGAGCACGGTATCCTCTGCCGAAACAGAGGTTGGACAAGACCGGAGGGGTCTCCTAG  
TTCCAAAGGAGATGTACTCCGGGCTTGTTACGACCTACCGTGTAAAGTCGTAGTCTAGTAGGCTACCT

+

@A00155:342:HHGFNDSXY:1:2551:17517:33896 1:N:0:GAACCTAG+TCCGCATA  
ATCTCAATGCCGAGAGGGATGTGGAGGGCGAGAGAGAGCGACTTCTCTCGGGCCACAGCCTTACAGC  
TGTGGAGCACGGTATCCTCTGCCGAAACAGAGGTTGGACAAGACCGGAGGGGTCTCCTAGTTCCAAAG

+

@A00155:342:HHGFNDSXY:1:2552:26386:3098 1:N:0:GAACCTAG+TCCGCATA  
CCCCGCCACACCGCCTTAGATCAGCTGTGTCCACTTAAGGACTCACCTCTGGCCTATGGTCATCTCAA  
TGCCGAGAGGGATGTGGAGGGCGAGAGAGAGCGACTTCTCTCGGGCCACAGCCTTACAGCTGTGGAG

+

@A00155:342:HHGFNDSXY:1:2552:9543:5462 1:N:0:GAACCTAG+TCCGCATA  
AGCGACTTCTCTCGGGCCACAGCCTTACAGCTGTGGAGCACGGTATCCTCTGCCGAAACAGAGGTTG  
GACAAGACCGGAGGGGTCTCCTAGTTCCAAAGGAGATGTACTCCGGGCTTGTTACAGACCTACCGTGT

+

@A00155:342:HHGFNDSXY:1:2552:27389:5713 1:N:0:GAACCTAG+TCCGCATA  
GGGCGAGAGAGAGCGACTTCTCTCGGGCCACAGCCTTACAGCTGTGGAGCACGGTATCCTCTGCCGA  
AACAGAGGTTGGACAAGACCGGAGGGGTCTCCTAGTTCCAAAGGAGATGTACTCCGGGCTTGTTACAG

 $+$ [illegible]

[illegible]

@A00155:342:HHGFNDSXY:1:2554:24487:2660 1:N:0:GAACCTAG+TCCGCATA  
GCCACAGCCTTACAGCTGTGGAGCACGGTATCCTCTGCCGAAACAGAGGTTGGACAAGACCGGAGGG  
GTCTCCTAGTTCCAAAGGAGATGTACTCCGGGCTTGTTACGACCTACCGTGTAAGTCGTAGTCTAGT  
+  
FFFFFFFFFFFFFFFFFFFFFFFFFFFFFFFFFFFFFFFFFFFFFFFFFFFFFFFFFFFFFFFFFFFFFFFF  
FFFFFFFFFFFFFFFFFFFFFFFFFFFFFFFFFFFFFFFFFFFFFFFFFFFFFFFFFFFFFFFFFFFFFFFF  
@A00155:342:HHGFNDSXY:1:2554:9724:3333 1:N:0:GAACCTAG+TCCGCATA  
ACTTCTCTCGGGCCACAGCCTTACAGCTGTGGAGCACGGTATCCTCTGCCGAAACAGAGGTTGGACA  
AGACCGGAGGGGTCTCCTAGTTCCAAAGGAGATGTACTCCGGGCTTGTTACGACCTAC  
+  
FFFFFFFFFFFFFFFFFFFFFFFFFFFFFFFFFFFFFFFFFFFFFFFFFFFFFFFFFFFFFFFFFFFFFFFF:FFFFFFF  
FFFFFFFFFFFFFFFFFFFFFFFFFFFFFFFFFFFFFFFFFFFFFFFFFFFFFFFFFFFFFFFFFFFFFFFF,FFFFF  
@A00155:342:HHGFNDSXY:1:2554:26910:16313 1:N:0:GAACCTAG+TCCGCATA  
TGTTTCGGCAGAGGATACCGTGCTCCACAGCTGTAAGGCTGTGGGCCCGAGAGAAGTCGCTCTCTCTC  
GCCCTTACATCCCTCTCGGCATTGAGATGACCATAGGCCAGAGGTGAGTCCTTAAGTGGACACAGCT  
+  
FFFFFFFFFFFFFFFFFFFFFFFFFFFFFFFFFFFFFFFFFFFFFFFFFFFFFFFFFFFFFFFFFFFFFFFF  
FFFFFFFFFFFFFFFFFFFFFFFFFFFFFFFFFFFFFFFFFFFFFFFFFFFFFFFFFFFFFFFFFFFFFFFF:FFFFFFF  
@A00155:342:HHGFNDSXY:1:2554:3595:22592 1:N:0:GAACCTAG+TCCGCATA  
ACAGCTGTGGAGCACGGTATCCTCTGCCGAAACAGAGGTTGGACAAGACCGGAGGGGTCTCCTGGTTC  
CAAAGGAGATGTACTCCGGGCTTGTTACGACCTACCGTGTAAGTCGTAGTCTAGTAGGCTACCTGAC  
+  
FFFFFFFFFFFFFFFFFFFFFFFFFFFFFFFFFFFFFFFFFFFFFFFFFFFFFFFFFFFFFFFFFFFFFFFF  
FFFFFFFFFFFFFFFFFFFFFFFF,FFF:FFFFFF:FFFFFFFFFFFFFFFFFFFFFFFFFFFFFFFF:FFFFFF:FFFF  
@A00155:342:HHGFNDSXY:1:2554:7826:24471 1:N:0:GAACCTAG+TCCGCATA  
ATGCCGAGAGGGATGTAGAGGGCGAGAGAGAGCGACTTCTCTCGGGCCACAGCCTTACAGCTGTGGA  
GCACGGTATCCTCTGCCGAAACAGAGGTTGGACAAGACCGGAGGGGTCTCCTAGTTCCAAAGGAGATG  
+  
FFFFFFFFFFFFFFFFFFFFFFFFFFFFFFFFFFFFFFFFFFFFFFFFFFFFFFFFFFFFFFFFFFFFFFFF  
FFFFFFFFFFFFFFFFFFFFFFFF:FFFFFFFFFFFFFFFFFFFFFFFFFFFFFFFFFFFFFFFFFFFFFFFF  
@A00155:342:HHGFNDSXY:1:2555:12943:4053 1:N:0:GAACCTAG+TCCGCATA  
CAATGCCGAGAGGGATGTGGAGGGCGAGAGAGAGCGACTTCTCTCGGGCCACAGCCTTACAGCTGTG  
GAGCACGGTATCCTCTGCCGAAACAGAGGTTGGACAAGACCGGAGGGGTCTCCTGGTTCCAAAGGAGA  
+  
FFFFFFFFFFFFFFFFFFFFFFFFFFFFFFFFFFFFFFFFFFFFFFFFFFFFFFFFFFFFFFFFFFFFFFFF  
FFFFFFFFFFFFFFFFFFFFFFFFFFFFFFFFFFFFFFFFFFFFFFFFFFFFFFFFFFFFFFFFFFFFFFFF:FFFFF  
@A00155:342:HHGFNDSXY:1:2555:30987:30827 1:N:0:GAACCTAG+TCCGCATA  
GAGCGACTTCTCTCGGGCCACAGCCTTACAGCTGTGGAGCACGGTATCCTCTGCCGAAACAGAGGTT  
GGACAAGACCGGAGGGGTCTCCTAGTTCCAAAGGAGATGTACTCCGGGCTTGTTACGACCTACCGTG  
+  
FFFFFFFFFFFFFFFFFFFFFFFFFFFFFFFFFFFFFFFFFFFFFFFFFFFFFFFFFFFFFFFFFFFFFFFF:FFFFFFFFFFFFFFFF  
FFFFF:FFFFFFFFFFFFFFFFFFFFFFFFFFFFFFFFFFFFFFFFFFFFFFFFFFFFFFFFFFFFFFFF:FFFFFFFFFFFFFFFF  
@A00155:342:HHGFNDSXY:1:2556:25446:8672 1:N:0:GAACCTAG+TCCGCATA  
AGGGATGTGGAGGGCGAGAGAGAGCGACTTCTCTCGGGCCACAGCCTTACAGCTGTGGAGCACGGTA  
TCCTCTGCCGAAACAGAGGTTGGACAAGACCGGAGGGGTCTCCTGGTTCCAAAGGAGATGTACTCCGG  
+  
FF:FF:FFFFFF:FFFFFFFFFFFFFFFFFFFFFFFFFFFFFFFF,FFFFFFFF:FFF:FFFFFFFFFFFFFFFF  
FFFFFFFF:FFFFF:,,:FF:FFFFFFFFFFFFFFFFFFFFFFFFFFFFFFFF,FFFFFFFF,FFFFFFFFFFFFFFFF  
@A00155:342:HHGFNDSXY:1:2556:5575:10708 1:N:0:GAACCTAG+TCCGCATA  
GAGGGCGAGAGAGAGCGACTTCTCTCGGGCCACAGCCTTACAGCTGTGGAGCACGGTATCCTCTGCC  
GAAACAGAGGTTGGACAAGACCGGAGGGGTCTCCTAGTTCCAAAGGAGATGTACTCCGGGCTTGTTCA  
+  
FFFFFFFFFFFFFFFFFFFFFFFFFFFFFFFFFFFFFFFFFFFFFFFFFFFFFFFFFFFFFFFFFFFFFFFF:FFF:FFF  
FFFFF,F:FFFFFFFF:FFFFFFFFFFFFFFFFFFFFFFFFFFFFFFFF:FFFFFFFFFFFFFFFF,FFF

[illegible]

@A00155:342:HHGFNDSXY:1:2558:23176:26506 1:N:0:GAACCTAG+TCCGCATA  
CTCTATGCCGAGAGGGATGTGGAGGGCGAGAGAGAGCGACTTCTCTCGGGCCCACAGCCTTACAGCTG  
TGGAGCACGGTATCCTCTGCCGAAACAGAGGTTGGACAAGACCGGAGGGGTCTCCTAGTTCCAAAGGA  
+  
FFFFFFFFFFFFFFFFFFFFFFFFFFFFFFFFFFFFFFFFFFFFFFFFFFFFFFFFFFFFFFFFFFFFFFFFFFFFF  
FFFFFFFFFFFFFFFFFFFFFFFFFFFFFFFFFFFFFFFFFFFFFFFFFFFFFFFFFFFFFFFFFFFFFFFFFFFFF:  
@A00155:342:HHGFNDSXY:1:2558:10050:30358 1:N:0:GAACCTAG+TCCGCATA  
ATCTCAATGCCGAGAGGGATGTGGAGGGCGAGAGAGAGCGACTTCTCTCGGGCCCACAGCCTTACAGC  
TGTGGAGCACGGTATCCTCTGCCGAAACAGAGGTTGGACAAGACCGGAGGGGTCTCCTAGTTCCAAAG  
+  
FFFFFFFFFFFFFFFFFFFFFFFFFFFFFFFFFFFFFFFFFFFFFFFFFFFFFFFFFFFFFFFFFFFFFFFFFFFFF  
FFFFFFFFFFFFFFFFFFFFFFFFFFFFFFFFFFFFFFFFFFFFFFFFFFFFFFFFFFFFFFFFFFFFFFFFFFFFF:  
@A00155:342:HHGFNDSXY:1:2559:22670:2018 1:N:0:GAACCTAG+TCCGCATA  
CAAGCCCCGAGTACATCTCCTTTGGAAGTAGGAGACCCCTCCGGTCTTGCCAACCTCTGTTTCGGCA  
GAGGATACCGTGCTCCACAGCTGTAAGGCTGTGGGCCCGAGAGAAGTCGCTCTCTCGCCCTCCACA  
+  
FFFFFFFFFFFFFFFFFFFFFFFFFFFFFFFFFFFFFFFFFFFFFFFFFFFFFFFFFFFFFFFFFFFFFFFFFFFFF  
FFFFFFFFFFFFFFFFFFFFFFFFFFFFFFFFFFFFFFFFFFFFFFFFFFFFFFFFFFFFFFFFFFFFFFFFFFFFF:  
@A00155:342:HHGFNDSXY:1:2559:11171:6965 1:N:0:GAACCTAG+TCCGCATA  
GCGACTTCTCTCGGGCCCACAGCCTTACAGCTGTGGAGCACGGTATCCTCTGCCGAAACAGAGTTGG  
ACAAGACCGGAGGGGTCTCCTAGTTCCAAAGGAGATGTACTCCGGGCTTGTTACGACCTACCGTGTA  
+  
FFFFFFFFFFFFFFFFFFFFFFFFFFFFFFFFFFFFFFFFFFFFFFFFFFFFFFFFFFFFFFFFFFFFFFFFFFFFF  
FFFFFFFFFFFFFFFFFFFFFFFFFFFFFFFFFFFFFFFFFFFFFFFFFFFFFFFFFFFFFFFFFFFFFFFFFFFFF,  
@A00155:342:HHGFNDSXY:1:2559:26521:32800 1:N:0:GAACCTAG+TCCGCATA  
GGGCGAGAGAGAGCGACTTCTCTCGGGCCCACAGCCTTACAGCTGTGGAGCACGGTATCCTCTGCCGA  
AACAGAGGTTGGACAAGACCGGAGGGGTCTCCTAGTTCCAAAGGAGATGTACTCCGGGCTTGTTACAG  
+  
FFFFFFFFFFFFFFFFFFFFFFFFFFFFFFFFFFFFFFFFFFFFFFFFFFFFFFFFFFFFFFFFFFFFFFFFFFFFF  
FFFFFFFFFFFFFFFFFFFFFFFFFFFFFFFFFFFFFFFFFFFFFFFFFFFFFFFFFFFFFFFFFFFFFFFFFFFFF:  
@A00155:342:HHGFNDSXY:1:2560:30942:6136 1:N:0:GAACCTAG+TCCGCATA  
GGGCGAGAGAGAGCGACTTCTCTCGGGCCCACAGCCTTACAGCTGTGGAGCACGGTATCCTCTGCCGA  
AACAGAGGTTGGACAAGACCGGAGGGGTCTCCTGTTCCAAAGGAGATGTACTCCGGGCTTGTTACAG  
+  
FFFFFFFFFFFFFFFFFFFFFFFFFFFFFFFFFFFFFFFFFFFFFFFFFFFFFFFFFFFFFFFFFFFFFFFFFFFFF  
FFFFFFFFFFFFFFFFFFFFFFFFFFFFFFFFFFFFFFFFFFFFFFFFFFFFFFFFFFFFFFFFFFFFFFFFFFFFF:  
@A00155:342:HHGFNDSXY:1:2560:13584:23015 1:N:0:GAACCTAG+TCCGCATA  
GAGGGCGAGAGAGAGCGACTTCTCTCGGGCCCACAGCCTTACAGCTGTGGAGCACGGTATCCTCTGCC  
GAAACAGAGGTTGGACAAGACCGGAGGGGTCTCCTAGTTCCAAAGGAGATGTACTCCGGGCTTGTTCA  
+  
FFFFFFFFFFFFFFFFFFFFFFFFFFFFFFFFFFFFFFFFFFFFFFFFFFFFFFFFFFFFFFFFFFFFFFFFFFFFF  
FFFFFFFFFFFFFFFFFFFFFFFFFFFFFFFFFFFFFFFFFFFFFFFFFFFFFFFFFFFFFFFFFFFFFFFFFFFFF:  
@A00155:342:HHGFNDSXY:1:2560:30445:26349 1:N:0:GAACCTAG+TCCGCATA  
GAGAGAGCGACTTCTCTCGGGCCCACAGCCTTACAGCTGTGGAGCACGGTATCCTCTGCCGAAACAGA  
GGTTGGACAAGACCGGAGGGGTCTCCTAGTTCCAAAGGAGATGTACTCCGGGCTTGTTACGACCTAC  
+  
FFFFFFFFFFFFFFFFFFFFFFFFFFFFFFFFFFFFFFFFFFFFFFFFFFFFFFFFFFFFFFFFFFFFFFFFFFFFF  
FFFFFFFFFFFFFFFFFFFFFFFFFFFFFFFFFFFFFFFFFFFFFFFFFFFFFFFFFFFFFFFFFFFFFFFFFFFFF:  
@A00155:342:HHGFNDSXY:1:2560:8811:31062 1:N:0:GAACCTAG+TCCGCATA  
CTTCTCTCGGGCCCACAGCCTTACAGCTGTGGAGCACGGTATCCTCTGCCGAAACAGAGGTTGGACAA  
GACCGGAGGGGTCTCCTGTTCCAAAGGAGATGTACTCCGGGCTTGTTACGACCTACCGTGT



@A00155:342:HHGFNDSXY:1:2561:1805:7811 1:N:0:GAACCTAG+TCCGCATA  
 GAGAGGGATGTGGAGGGCGAGAGAGAGCGACTTCTCTCGGGCCACAGCCTTACAGCTGTGGAGCACG  
 GTATCCTCTGCCGAAACAGAGGTTGGACAAGACCGGAGGGGTCTCCTAGTTCCAAAGGAGATGTACTC  
 +  
 F,FFFFF,:F,FF,F:FFFFF:F:FFFFF,FFFFFFFFFFFFFFFFFFFFF:,FFF,:F:FFFFFFFFFFFF,FF  
 ,,,:FFFFFFFFFFFF:FFFF:F:,FF:FF,:FF:FF,FFFFFF:FF,:FF:F::FFFFFFFF:FF:FFF  
 @A00155:342:HHGFNDSXY:1:2561:4182:7983 1:N:0:GAACCTAG+TCCGCATA  
 CGACTTCTCTCGGGCCACAGCCTTACAGCTGTGGAGCACGGTATCCTCTGCCGAAACAGAGGTTGGA  
 CAAGACCGGAGGGGTCTCCTAGTTCCAAAGGAGATGTACTCCGGGCTTGTTACGACCTACCGTGTA  
 +  
 FFFFFFFF:FFF,FFFFFFFFFFFF:FF:FFF:FF:FFFFF:FFFF,FFFFFFFFFFFF:FFFFFFFFFFFF,FFF  
 F,FFFFF:FFFFFFFFF,FFFFFFFFFFFF:FF:FF:FF,F,FFFFFFFFFFFF:FFFFFFFFFFFF,FFFF:F  
 @A00155:342:HHGFNDSXY:1:2562:27570:9972 1:N:0:GAACCTAG+TCCGCATA  
 GAGCGACTTCTCTCGGGCCACAGCCTTACAGCTGTGGAGCACGGTATCCTCTGCCGAAACAGAGGTT  
 GGACAAGACCGGAGGGGTCTCCTAGTTCCAAAGGAGATGTACTCCGGGCTTGTTACGACCTACCGTG  
 +  
 FFFFFFFFFFFFFFFFFFFFFFFFFFFFFFFFFFFFFFFFFFFFFFFFFFFFFFFFFFFFFFFFFFFFFFFFFFFFFF  
 FFFFFFFFFFFFFFFFFFFFFFFFFFFFFFFFFFFFFFFFFFFFFFFFFFFFFFFFFFFFFFFFFFFFFFFFFFFFFF  
 @A00155:342:HHGFNDSXY:1:2562:3278:12743 1:N:0:GAACCTAG+TCCGCATA  
 CGACTTCTCTCGGGCCACAGCCTTACAGCTGTGGAGCACGGTATCCTCTGCCGAAACAGAGGTTGGA  
 CAAGACCGGAGGGGTACCTAGTTCCAAAGGAGATGTACTCCGGGCTTGTTACGACCTACCGTGTA  
 +  
 FFFFFFFF:FFF:FFFFFFFFFFFFFFFFFFFFFFFFFFFFFFFFFFFFFFFFFFFFFFFFFFFFFFFFFFFFF  
 FFFFFFFFFFFFF,FFFFFFFFFFFFFFFFFFFFFFFFFFFFFFFFFFFFFFFFFFFFFFFFFFFFFFFFFFFFF:FFFF  
 @A00155:342:HHGFNDSXY:1:2562:27805:16297 1:N:0:GAACCTAG+TCCGCATA  
 GAGCGACTTCTCTCGGGCCACAGCCTTACAGCTGTGGAGCACGGTATCCTCTGCCGAAACAGAGGTT  
 GGACAAGACCGGAGGGGTCTCCTAGTTCCAAAGGAGATGTACTCCGGGCTTGTTACGACCTACCGTG  
 +  
 FFFFFFFF:FFFFFFFF:FFFFFFFFFFFFFFFFFFFFFFFFFFFFFFFFFFFFFFFFFFFFFFFFFFFFFFFFF  
 FFFFFFFFFFFFFF:FFFF:FFFF:FFFFFFFFFFFFFFFFFFFF,FFFFFFFFFFFFFFFFFFFFFFFFFFFFF  
 @A00155:342:HHGFNDSXY:1:2562:23176:21997 1:N:0:GAACCTAG+TCCGCATA  
 CCCACAGCCTTACAGCTGTGGAGCACGGTATCCTCTGCCGAAACAGAGGTTGGACAAGACCGGAGGGG  
 TCTCCTAGTTCCAATGGAGATGTACTCCGGGCTTGTTACGACCTACCGTGTAAGTCGTAGTCTAGTA  
 +  
 FFFFFFFFFFFFF:,FFFFFFFFFFFFFFFFFFFFFFFFFFFFFFFFFFFFFFFFFFFFF:FFFFFFFFFFFFFFFFFFFFF  
 FFFFFFFFFFFFFFFFFFFFFFFFFFFFFFFFFFFFFFFFFFFFFFFFFFFFFFFFFFFFFFFFFFFFFFFFFFFFFF  
 @A00155:342:HHGFNDSXY:1:2562:17363:31876 1:N:0:GAACCTAG+TCCGCATA  
 GAGCGACTTCTCTCGGGCCACAGCCTTACAGCTGTGGAGCACGGTATCCTCTGCCGAAACAGAGGTT  
 GGACAAGACCGGAGGGGTCTCCTAGTTCCAAAGGAGATGTACTCCGGGCTTGTTACGACCTACCGTG  
 +  
 FFFFFFFFFFFFFFFFFFFFFFFFFFFFFFFFFFFFFFFFFFFFFFFFFFFFFFFFFFFFFFFFFFFFFFFFFFFFFF  
 FFFFFFFFFFFFFFFFFFFFFFFFFFFFFFFFFFFFFFFFFFFFFFFFFFFFFFFFFFFFFFFFFFFFFFFFFFFFFF  
 @A00155:342:HHGFNDSXY:1:2563:26033:14418 1:N:0:GAACCTAG+TCCGCATA  
 CTTCTCTCGGGCCACAGCCTTACAGCTGTGGAGCACGGTATCCTCTGCCGAAACAGAGGTTGGACAA  
 GACCGGAGGGGTCTCCTGGTTCCAAAGGAGATGTACTCCGGGCTTGTTACGACCTACCGTGTAAGTC  
 +  
 FFFFFFFFFFFFFFFFFFFFFFFFFFFFFFFFFFFFFF:FFFFFFFFFFFFFFFFFFFFFFFFFFFFFFFFFFFFF  
 FFFFFFFFFFFFFFFFFFFFFFFFFFFFFFFFFFFFFFFFFFFFFFFFFFFFFFFFFFFFFFFFFFFFFFFFFFFFFF  
 @A00155:342:HHGFNDSXY:1:2563:7627:26193 1:N:0:GAACCTAG+TCCGCATA  
 AGAGAGAGCGACTTCTCTCGGGCCACAGCCTTACAGCTGTGGAGCACGGTATCCTCTGCCGAAACAG  
 AGGTTGGACAAGACCGGAGGGGTCTCCTAGTTCCAAAGGAGATGTACTCCGGGCTTGTTACGACCTA  
 +  
 FFFFFFFF:FFFFFFFFFFFFFFFFFFFFFFFFFFFFF:FFFFFFFFFFFFFFFFFFFFFFFFFFFFFFFFFFFFF  
 FFFFFFFFFFFFFFFFFFFFFFFFFFFFFFFFFFFFFF:FFFFFFFF:FFF:FFFFFFF,FFFFFFFFFFFFFFFF:FFFFF

@A00155:342:HHGFNDSXY:1:2563:30608 1:N:0:GAACCTAG+TCCGCATA  
AGAGAGAGCGACTTCTCTCGGGCCCACAGCCTTACAGCTGTGGAGCACGGTATCCTCTGCCGAAACAG  
AGGTTGGACAAGACCGGAGGGGTCTCCTTGTTCCAAAGGAGATGTACTCCGGGCTTGTTACGAC  
+  
FFFFFFFFFFFFFFFFFFFFFFFFFFFFFFFFFFFFF,FFFFF:FFFFFFF::FFF:FFFFFF,FFFFFFFFFFFF  
FFFFFFFFFFFF,FFFFFFFF:FFFFFFFF,FFFFFFFFFFFFFFFFFFFF,FFF,FFFF::FFFF,FF  
@A00155:342:HHGFNDSXY:1:2564:16993:23187 1:N:0:GAACCTAG+TCCGCATA  
GTCCTAAAAGGACTCGTCAGGTAGCCTACTAGACTACGACTTACACGGTA  
+  
FFFFFFFFFFFFFFFFFFFFFFFFFFFFFFFFFFFFFFFFFFFFFFFFFFFFFFFFFFFFFFFFFFFFF  
@A00155:342:HHGFNDSXY:1:2564:9272:33489 1:N:0:GAACCTAG+TCCGCATA  
ATGCCGAGAGGGATGTGGAGGGCGAGAGAGAGCGACTTCTCTCGGGCCCACAGCCTTACAGCTGTGGA  
GCACGGTATCCTCTGCCGAAACAGAGGTTGGACAAGACCGGAGGGGTCTCCAGTTCCAAAGGAGATG  
+  
FFFFFFFFFFFFFFFFFFFFFFFFFFFFFFFFFFFFFFFFFFFFFFFFFFFFFFFFFFFFFFFFFFFFFFFFF  
FFFFFFFFFFFFFFFFFFFFFFFFFFFFFFFFFFFFFFFFFFFFFFFFFFFFFFFFFFFFFFFFFFFFFFFFF  
@A00155:342:HHGFNDSXY:1:2565:10330:5635 1:N:0:GAACCTAG+TCCGCATA  
TGCCGAGAGGGATGTGGAGGGCGAGAGAGAGCGACTTCTCTCGGGCCCACAGCCTTACAGCTGTGGAG  
CACGGTATCCTCTGCCGAAACAGAGGTTGGACAAGACCGGAGGGGTCTCCTAGTTCCAAAGGAGATGT  
+  
FFFFFFFFFFFFFFFFFFFFFFFFFFFFFFFFFFFFFFFFFFFFFFFFFFFFFFFFFFFFFFFFFFFFFFFFF  
FFFFFFFFFFFFFFFFFFFFFFFFFFFFFFFFFFFFFFFFFFFFFFFFFFFFFFFFFFFFFFFFFFFFFFFFF  
@A00155:342:HHGFNDSXY:1:2565:3088:23500 1:N:0:GAACCTAG+TCCGCATA  
ATCTCAATGCCGAGAGGGATGTAGAGGGCGAGAGAGAGCGACTTCTCTCGGGCCCACAGCCTTACAGC  
TGTGGAGCACGGTATCCTCTGCCGAAACAGAGGTTGGACAAGACCGGAGGGGTCTCCTAGTTCCAAAG  
+  
FFFFFFFFFFFFFFFF,F:FFFF:FFFFFFFFFFFFFFFFFFFFFFFFFFFFFFFFFFFFFFFFFFFFFFFFF  
FFFFFFFFFFFFFFFFFFFFFFFFFFFFFFFFFFFFFFFFFFFFFFFFFFFFFFFFFFFFFFFFFFFFFFFFF  
@A00155:342:HHGFNDSXY:1:2565:25816:24846 1:N:0:GAACCTAG+TCCGCATA  
TCCTCTGCCGAAACAGAGGTTGGACAAGACCGGAGGGGTCTCCTAGTTCCAAAGGAGATGTACTCCGG  
GCTTGTTACGACCTACCGTGTAAGTCGTAGTCTAGTAGGCTACCTGACGAGTCCTTTTTAGGACGAA  
+  
FFFFFFFFFFFFFFFFFFFFFFFFFFFFFFFFFFFFFFFFFFFFFFFFFFFFFFFFFFFFFFFFFFFFFFFFF  
FFFFFFFFFFFFFFFFFFFFFFFFFFFFFFFFFFFFFFFFFFFFFFFFFFFFFFFFFFFFFFFFFFFFFFFFF  
@A00155:342:HHGFNDSXY:1:2565:13539:28197 1:N:0:GAACCTAG+TCCGCATA  
GGATGTGGAGGGCGAGAGAGAGCGACTTCTCTCGGGCCCACAGCCTTACAGCTGTGGAGCACGGTATT  
CTCTGCCGAAACAGAGGTTGGACAAGACCGGAGGGGTCTCCTAGTTCCAAAGGAGATGTACTCC  
+  
FFFFFFFFFFFFFFFFFFFFFFFFFFFFFFFFFFFFFFFFFFFFFFFFFFFFFFFFFFFFFFFFFFFFFFFFF  
FFFFFFFFFFFFFFFFFFFFFFFFFFFFFFFFFFFFFFFFFFFFFFFFFFFFFFFFFFFFFFFFFFFFF:FFFFFFFFF  
@A00155:342:HHGFNDSXY:1:2565:19985:34194 1:N:0:GAACCTAG+TCCGCATA  
ATGCCGAGAGGGATGTGGAGGGCGAGAGAGAGCGACTTCTCTCGGGCCCACAGCCTTACAGCTGTGGA  
GCACGGTATCCTCTGCCGAAACAGAGGTTGGACAAGACCGGAGGGGTCTCCTGGTTCCAAAGGAGATG  
+  
FFFFFFFFFFFFFFFF:FFFFFFFFFFFFFFFFFFFFFFFFFFFFFFFFFFFFFFFFFFFFFFFFFFFFF:FFFFFFFFF  
FFFFFFFFFFFFFFFFFFFFFFFFFFFFFFFFFFFFFFFFFFFFFFFFFFFFFFFFFFFFFFFFFFFFFFFFF  
@A00155:342:HHGFNDSXY:1:2565:15465:34350 1:N:0:GAACCTAG+TCCGCATA  
TATCCTCTGCCGAAACAGAGGTTGGACAAGACCGGAGGGGTCTCCTAGTTCCAAAGGAGATGTACTCC  
GGGCTTGTTACGACCTACCGTGTAAGTCGTAGTCTAGTAGGCTACCTGACGAGTCCTTTTTAGGACG  
+  
FFFFFFFFFFFFFFFFFFFFFFFFFFFFFFFFFFFFFFFFFFFFFFFFFFFFFFFFFFFFFFFFFFFFFFFFF  
FFFFFFFFFFFFFFFFFFFFFFFFFFFFFFFFFFFFFFFFFFFFFFFFFFFFFFFFFFFFFFFFFFFFFFFFF  
@A00155:342:HHGFNDSXY:1:2566:32253:8124 1:N:0:GAACCTAG+TCCGCATA  
AGAGAGAGCGACTTCTCTCGGGCCCACAGCCTTACAGCTGTGGAGCACGGTATCCTCTGCCGAAACAG

AGGTTGGACAAGACCGGAGGGGTCTCCTAGTTCCAAAGGAGATGTACTCCGGGCTTGTTACACGACCTA  
+  
FFFFFFFFFFFFFFFFFFFFFFFFFFFFFFFFFFFFFFFFFFFFFFFFFFFFFFFFFFFFFFFFFFFFFFFF:FFFF  
FFFFFFFFFFFFFFFFFFFFFFFFFFFFFFFFFFFFFFFFFFFFFFFFFFFFFFFFFFFFFFFFFFFFFFFF:FFFFFFFF  
@A00155:342:HHGFNDSXY:1:2567:19045:3223 1:N:0:GAACCTAG+TCCGCATA  
GGATGTGGAGGGCGAGAGAGAGCGACTTCTCTCGGGCCACAGCCTTACAGCTGTGGAGCACGGTATC  
CTCTGCCGAAACAGAGGTTGGACAAGACCGGAGGGGTCTCCTGGTTCCAAAGGAGATGTACTCC  
+  
FFFFFFFFFFFFFFFFFFFFFFFF,FFFFFFFFFFFFFFFFFFFFFFFFFFFFFFFFFFFFFFFFFFFFFFFF:FF  
FFFFFFFFFFFFFFFFFFFFFFFFFFFFFFFFFFFFFFFFFFFFFFFFFFFFFFFFFFFFFFFFFFFFFFFF  
@A00155:342:HHGFNDSXY:1:2567:27272:8641 1:N:0:GAACCTAG+TCCGCATA  
ATCTCAATGCCGAGAGGGATGTAGAGGGCGAGAGAGAGCGACTTCTCTCGGGCCACAGCCTTACAGC  
TGTGGAGCACGGTATCCTCTGCCGAAACAGAGGTTGGACAAGACCGGAGGGGTCTCCTAGTTCCAAAG  
+  
FFFFFFFFFFFFFFFFFFFFFFFFFFFFFFFFFFFFFFFFFFFFFFFFFFFFFFFFFFFFFFFFFFFFFFFF:FFFFFFF:FFFF  
FFFFFFFFFFFFFFFFFFFFFFFFFFFFFFFFFFFFFFFFFFFFFFFFFFFFFFFFFFFFFFFFFFFFFFFF,FFFFFFFFFFFFFFFFFFFFFFFFFFFFFFFF  
@A00155:342:HHGFNDSXY:1:2567:20184:9392 1:N:0:GAACCTAG+TCCGCATA  
AGGAGATGTACTCCGGGCTTGTTACGACCTACCGTGTAAGTCGTAGTCTAGTAGGCTACCTGACGAG  
TCCTTTTATAGGACGAACTTACACAACCTCAAAGAGTAACGACGGTTTCGTCCTTGAAC  
+  
FFFFFFFFFFFFFFFFFFFFFFFFFFFFFFFFFFFFFFFFFFFFFFFFFFFFFFFFFFFFFFFFFFFFFFFFFFFF  
FFFFFFFFFFFFFFFFFFFFFFFFFFFFFFFFFFFFFFFFFFFFFFFFFFFFFFFFFFFFFFFFFFFFFFFF:FFFFF  
@A00155:342:HHGFNDSXY:1:2567:14226:15608 1:N:0:GAACCTAG+TCCGCATA  
GAGAGAGAGCGACTTCTCTCGGGCCACAGCCTTACAGCTGTGGAGCACGGTATCCTCTGCCGAAACA  
GAGGTTGGACAAGACCGGAGGGGTCTCCTAGTTCCAAAGGAGATGTACTCCGGGCTTGTTACGACCT  
+  
FFFFFFFFFFFFFFFFFFFFFFFFFFFFFFFFFFFFFFFFFFFFFFFFFFFFFFFFFFFFFFFFFFFFFFFFFFFF  
FFFFFFFFFFFFFFFFFFFFFFFFFFFFFFFFFFFFFFFFFFFFFFFFFFFFFFFFFFFFFFFFFFFFFFFFFFFF  
@A00155:342:HHGFNDSXY:1:2567:8703:29684 1:N:0:GAACCTAG+TCCGCATA  
GCCCCACCACACCGCCTTAGATCAGCTGTGTCCACTTAAGGACTCACCTCTGGCCTATGGTCATCTCA  
ATGCCGAGAGGGATGTGGAGGGCGAGAGAGAGCGACTTCTCTCGGGCCACAGCCTTACAGCTGTGGA  
+  
FFFFFFFFFFFFFFFFFFFFFFFFFFFF:FFFFFFFFFFFFFFFFFFFFFFFFFFFFFFFFFFFFFFFFFFFFF  
FFFFFFFFF:FFFFFFFFFFFFFFFFFFFFFFFFFFFFFFFFFFFFFFFFFFFFFFFFFFFFFFFFFFFFFFFFF  
@A00155:342:HHGFNDSXY:1:2567:11632:32127 1:N:0:GAACCTAG+TCCGCATA  
ACCTCTGTTTCGGCAGAGGATACCGTGCTCCACAGCTGTAAGGCTGTGGGCCCGAGAGAAGTCGCTCT  
CTCTCGCCCTCCACATCCCTCTCGGCATTGAGATGACCATAGGCCAGAGGAGAGTCCTTAAGTGGACA  
+  
FFFFFFFFFFFFFFFFFFFFFFFFFFFFFFFFFFFFFFFFFFFFFFFFFFFFFFFFFFFFFFFFFFFFFFFFFFFF  
FFFFFFFFFFFFFFFFFFFFFFFFFFFFFFFFFFFFFFFFFFFFFFFFFFFFFFFFFFFFFFFFFFFFFFFFFFFF  
@A00155:342:HHGFNDSXY:1:2567:12066:33348 1:N:0:GAACCTAG+TCCGCATA  
ACCTCTGTTTCGGCAGAGGATACCGTGCTCCACAGCTGTAAGGCTGTGGGCCCGAGAGAAGTCGCTCT  
CTCTCGCCCTCCACATCCCTCTCGGCATTGAGATGACCATAGGCCAGAGGAGAGTCCTTAAGTGGACA  
+  
FFFFFFFFFFFFFFFFFFFFFFFFFFFFFFFFFFFFFFFFFFFFFFFFFFFFFFFFFFFFFFFFFFFFFFFFFFFF  
FFFFFFFFFFFFFFFFFFFFFFFFFFFFFFFFFFFFFFFFFFFFFFFFFFFFFFFFFFFFFFFFFFFFFFFFFFFF  
@A00155:342:HHGFNDSXY:1:2568:20853:4413 1:N:0:GAACCTAG+TCCGCATA  
GAGAGGGATGTGGAGGGCGAGAGAGAGCGACTTCTCTCGGGCCACAGCCTTACAGCTGTGGAGCACG  
GTATCCTCTGCCGAAACAGAGGTTGGACAAGACCGGAGGGGTCTCCTAGTTCCAAAGGAGATGTACTC  
+  
FFF:FFFFFFFFFFFFFFFFFFFFFFFFFFFFFFFFFFFFFFFFFFFFFFFFFFFFFFFFFFFFFFFFFFFFF  
FFFFFFFFFFFFFFFFFFFFFFFFFFFFFFFFFFFFFFFFFFFFFFFFFFFFFFFFFFFFFFFFFFFFFFFFFFFF  
@A00155:342:HHGFNDSXY:1:2568:29758:8030 1:N:0:GAACCTAG+TCCGCATA  
ATCTCAATGCCGAGAGGGATGTGGAGGGCGAGAGAGAGCGACTTCTCTCGGGCCACAGCCTTACAGC

TGTGGAGCACGGTATCCTCTGCCGAAACAGAGGTTGGACAAGACCGGAGGGGTCTCCTAGTTCCAAAG  
+  
FFFFFFFFFFFFFFFFFFFFFFFFFFFFFFFFFFFFFFFFFFFFFFFFFFFFFFFFFFFFFFFFFFFFFFFF  
FFFFFFFFFFFFFFFFFFFFFFFFFFFFFFFFFFFFFFFFFFFFFFFFFFFFFFFFFFFFFFFFFFFFFFFF  
@A00155:342:HHGFNDSXY:1:2568:25834:11945 1:N:0:GAACCTAG+TCCGCATA  
CTTCTCTCGGGCCCACAGCCTTACAGCTGTGGAGCACGGTATCCTCTGCCGAAACAGAAGTTGGACAA  
GACCGGAGGGGTCTCCTAGTTCCAAAGGAGATGTACTCCGGGCTTGTTACGACCTACCGTGTAAGTC  
+  
FFFFFFFFFFFFFFFFFFFFFFFFFFFFFFFFFFFFFFFFFFFFFFFFFFFFFFFFFFFFFFFFFFFFFFFF  
FFFFFFFFFFFFFFFFFFFFFFFFFFFFFFFFFFFFFFFFFFFFFFFFFFFFFFFFFFFFFFFFFFFFFFFF  
@A00155:342:HHGFNDSXY:1:2568:11107:15749 1:N:0:GAACCTAG+TCCGCATA  
CAGCCTTACAGCTGTGGAGCACGGTATCCTCTGCCGAAACAGAGGTTGGACAAGACCGGAGGGGTCTC  
CTAGTTCCAAAGGAGATGTACTCCGGGCTTGTTACGACCTACCGTGTAAGTCGTAGTCTAGTAGGCT  
+  
FFFFFFFFFFFFFFFFFFFFFFFFFFFFFFFFFFFFFFFFFFFFFFFFFFFFFFFFFFFFFFFFFFFFFFFF  
FFFFFFFFFFFFFFFFFFFFFFFFFFFFFFFFFFFFFFFFFFFFFFFFFFFFFFFFFFFFFFFFFFFFFFFF  
@A00155:342:HHGFNDSXY:1:2568:31024:29481 1:N:0:GAACCTAG+TCCGCATA  
GACTTCTCTCGGGCCCACAGCCTTACAGCTGTGGAGCACGGTATCCTCTGCCGAAACAGAGGTTGGAC  
AAGATCGGAGGGGTCTCCTAGTTCCAAAGGAGATGTACTCCGGGCTTGTTACGACCTACCGTGTAAG  
+  
FFFFFFFFFFFFFFFFFFFFFFFFFFFFFFFFFFFFFFFFFFFFFFFFFFFFFFFFFFFFFFFFFFFFFFFF  
FFFFFFFFFFFFFFFFFFFFFFFFFFFFFFFFFFFFFFFFFFFFFFFFFFFFFFFFFFFFFFFFFFFFFFFF  
@A00155:342:HHGFNDSXY:1:2568:25762:32675 1:N:0:GAACCTAG+TCCGCATA  
GCTGATCTAAGGCGGTGTGGCGGGGCATGGGTTTGAACCCCATGACGGTCGGAGTCTAGTAGGCTCC  
CTGATGAGTCCGTTCCAAGGACGAAACCGTCGTTACTCTACGAGTTGTGTAAGTTTCGTC  
+  
FFFFFFFFFFFFFFFFFFFFFFFFFFFFFFFFFFFFFFFFFFFFFFFFFFFFFFFFFFFFFFFFFFFFFFFF  
FFFF:FFFFFFFFFFFFFFFFFFFFFFFFFFFFFFFFFFFFFFFFFFFFFFFFFFFFFFFFFFFFFFFF  
@A00155:342:HHGFNDSXY:1:2569:16821:3443 1:N:0:GAACCTAG+TCCGCATA  
GATGTAGAGGGCGAGAGAGCGACTTCTCTCGGGCCCACAGCCTTACAGCTGTGGAGCACGGTATCC  
TCTGCCGAAACAGAGGTTGGACAAGACCGGAGGGGTCTCCTAGTTCCAAAGGAGATGTACTCCGGGCT  
+  
FFFFFFFFFFFFFFFFFFFFFFFFFFFFFFFFFFFFFFFFFFFFFFFFFFFFFFFFFFFFFFFFFFFFFFFF  
FFFFFFFFFFFFFFFFFFFFFFFFFFFFFFFFFFFFFFFFFFFFFFFFFFFFFFFFFFFFFFFFFFFFFFFF  
@A00155:342:HHGFNDSXY:1:2569:11505:17096 1:N:0:GAACCTAG+TCCGCATA  
TCGGCAGAGGATACCGTGCTCCACAGCTGTAAGGCTGTGGGCCCGAGAGAAGTCGCTCTCTCGCCC  
TTCACATCCCTCTCGGCATTGAGATGACCATAGGCCAGAGGTGAGTCCTTAAGTGGACACA  
+  
FFFFFFFFFFFFFFFFFFFFFFFFFFFFFFFFFFFFFFFFFFFFFFFFFFFFFFFFFFFFFFFFFFFFFFFF  
FFFFFFFFFFFFFFFFFFFFFFFFFFFFFFFFFFFFFFFFFFFFFFFFFFFFFFFFFFFFFFFFFFFFFFFF  
@A00155:342:HHGFNDSXY:1:2569:29677:26209 1:N:0:GAACCTAG+TCCGCATA  
GAGAGAGCGACTTCTCTCGGGCCCACAGCCTTACAGCTGTGGAGCACGGTATCCTCTGCCGAAACAGA  
GGTTGGACAAGACCGGAGGGGTCTCCTAGTTCCAAAGGAGATGTACTCCGGGCTTGTTACGAC  
+  
FFFFFFFFFFFFFFFFFFFFFFFFFFFFFFFFFFFFFFFFFFFFFFFFFFFFFFFFFFFFFFFFFFFFFFFF  
FFFFFFFFFFFFFFFFFFFFFFFFFFFFFFFFFFFFFFFFFFFFFFFFFFFFFFFFFFFFFFFFFFFFFFFF  
@A00155:342:HHGFNDSXY:1:2569:29884:26600 1:N:0:GAACCTAG+TCCGCATA  
GAGAGAGCGACTTCTCTCGGGCCCACAGCCTTACAGCTGTGGAGCACGGTATCCTCTGCCGAAACAGA  
GGTTGGACAAGACCGGAGGGGTCTCCTAGTTCCAAAGGAGATGTACTCCGGGCTTGTTACGAC  
+  
FFFFFFFFFFFFFFFFFFFFFFFFFFFFFFFFFFFFFFFFFFFFFFFFFFFFFFFFFFFFFFFFFFFFFFFF  
FFFFFFFFFFFFFFFFFFFFFFFFFFFFFFFFFFFFFFFFFFFFFFFFFFFFFFFFFFFFFFFFFFFFFFFF  
@A00155:342:HHGFNDSXY:1:2569:28800:32831 1:N:0:GAACCTAG+TCCGCATA  
TGGTCATCTCAATGCCGAGAGGGATGTGGAGGGCGAGAGAGAGCGACTTCTCTCGGGCCCACAGCCTT

ACAGCTGTGGAGCACGGTATCCTCTGCCGAAACAGAGGTTGGACAAGACCGGAGGGGTCTCCTAGTTC  
+  
FFFFFFFFFFFFFFFFFFFFFFFFFFFFFFFFFFFFFFFFFFFFFFFFFFFFFFFFFFFFFFFFFFFFFFFF  
FFFFFFFFFFFFFFFFFFFFFFFFFFFFFFFFFFFFFFFFFFFFFFFFFFFFFFFFFFFFFFFFFFFFFFFF  
@A00155:342:HHGFNDSXY:1:2570:30038:15311 1:N:0:GAACCTAG+TCCGCATA  
TCGGCAGAGGATACCGTGCTCCACAGCTGTAAGGCTGTGGGCCCGAGAGAAGTCGCTCTCTCGCCC  
TTCACATCCCTCTCGGCATTGAGATGACCATAGGCCAGAGGTGAGTCCTTAAGTGGACACA  
+  
FFFFFFFFFFFFFFFFFFFFFFFFFFFFFFFFFFFFFFFFFFFFFFFFFFFFFFFFFFFFFFFFFFFFFFFF:FFFFFFF  
FFFFFFFFFFFFFFFFFFFFFFFFFFFFFFFFFFFFFFFFFFFFFFFFFFFFFFFFFFFFFFFFFFFFFFFF  
@A00155:342:HHGFNDSXY:1:2570:22779:17675 1:N:0:GAACCTAG+TCCGCATA  
CGACTTCTCTCGGGCCACAGCCTTACAGCTGTGGAGCACGGTATCCTCTGCCGAAACAGAGGTTGGA  
CAAGACCGGAGGGGTCTCCTAGTTCCAAAGGAGATGTACTCCGGGCTTGTTACGACCTACCGTGTA  
+  
FFFFFFFFFFFFFFFFFFFFFFFFFFFFFFFFFFFFFFFFFFFFFFFFFFFFFFFFFFFFFFFFFFFFFFFF:FFFFFFF  
FFF:FFFFFFFFFFFFFFFFFFFFFFFFFFFFFFFFFFFFFFFFFFFFFFFFFFFFFFFFFFFFFFFFFFFF  
@A00155:342:HHGFNDSXY:1:2570:10872:21324 1:N:0:GAACCTAG+TCCGCATA  
AATGCCGAGAGGGATGTAGAGGGCGAGAGAGAGCGACTTCTCTCGGGCCACAGCCTTACAGCTGTGG  
AGCACGGTATCCTCTGCCGAAACAGAGGTTGGACAAGACCGGAGGGGTCTCCTAGTTCCAAAGGAGAT  
+  
FFFFFFFFFFFFFFFFFFFFFFFFFFFFFFFFFFFFFFFFFFFFFFFFFFFFFFFFFFFFFFFFFFFFFFFF  
FFFFFFFFFFFFFFFFFFFFFFFFFFFFFFFFFFFFFFFFFFFFFFFFFFFFFFFFFFFFFFFFFFFFFFFF  
@A00155:342:HHGFNDSXY:1:2570:10493:23046 1:N:0:GAACCTAG+TCCGCATA  
AATGCCGAGAGGGATGTAGAGGGCGAGAGAGAGCGACTTCTCTCGGGCCACAGCCTTACAGCTGTGG  
AGCACGGTATCCTCTGCCGAAACAGAGGTTGGACAAGACCGGAGGGGTCTCCTAGTTCCAAAGGAGAT  
+  
FFFFFFFFFFFFFFFFFFFFFFFFFFFFFFFFFFFFFFFFFFFFFFFFFFFFFFFFFFFFFFFFFFFFFFFF:FFFF:FFFFFFFFFFFFFFFFFFFFFFFFFFFFFFFF  
FFFF:FFFFFFFFFFFFFFFFFFFFFFFFFFFFFFFFFFFFFFFFFFFFFFFFFFFFFFFFFFFFFFFFFFFF  
@A00155:342:HHGFNDSXY:1:2570:24297:30389 1:N:0:GAACCTAG+TCCGCATA  
GCGACTTCTCTCGGGCCACAGCCTTACAGCTGTGGAGCACGGTATCCTCTGCCGAAACAGAGGTTGG  
ACAAGACCGGAGGGGTCTCCTAGTTCCAAAGGAGATGTACTCCGGGCTTGTTACGACCTACCGTGTA  
+  
FFFFFFFFFFFFFFFFFFFFFFFFFFFFFFFFFFFFFFFFFFFFFFFFFFFFFFFFFFFFFFFFFFFFFFFF  
FFFFFFFFFFFFFFFFFFFFFFFFFFFFFFFFFFFFFFFFFFFFFFFFFFFFFFFFFFFFFFFFFFFFFFFF  
@A00155:342:HHGFNDSXY:1:2570:32362:34741 1:N:0:GAACCTAG+TCCGCATA  
CTTCTCTCGGGCCACAGCCTTACAGCTGTGGAGCACGGTATCCTCTGCCGAAACAGAGGTTGGACAA  
GACCGGAGGGGTCTCCTAGTTCCAAAGGAGATGTACTCCGGGCTTGTTACGACCTACCGTGTAAGTC  
+  
FFFFFFFFFFFFFFFFFFFFFFFFFFFFFFFFFFFFFFFFFFFFFFFFFFFFFFFFFFFFFFFFFFFFFFFF  
FFFFFFFFFFFFFFFFFFFFFFFFFFFFFFFFFFFFFFFFFFFFFFFFFFFFFFFFFFFFFFFFFFFFFFFF  
@A00155:342:HHGFNDSXY:1:2570:19298:37043 1:N:0:GAACCTAG+TCCGCATA  
CTTCTCTCGGGCCACAGCCTTACAGCTGTGGAGCACGGTATCCTCTGCCGAAACAGAGGTTGGACAA  
GACCGGAGGGGTCTCCTGGTTCCAAAGGAGATGTACTCCGGGCTTGTTACGACCTACCGTGTAAGTC  
+  
FFFFFFFFFFFFFFFFFFFFFFFFFFFFFFFFFFFFFFFFFFFFFFFFFFFFFFFFFFFFFFFFFFFFFFFF  
FFFFFFFFFFFFFFFFFFFFFFFFFFFFFFFFFFFFFFFFFFFFFFFFFFFFFFFFFFFFFFFFFFFFFFFF  
@A00155:342:HHGFNDSXY:1:2571:26377:1955 1:N:0:GAACCTAG+TCCGCATA  
CTCTCTCGCCCTCCACATCCCTCTCGGCATTGAGATGACCATAGGCCAGAGGTGAGTCCTTAAGTGA  
CACAGCTGATCTAAGGCGGTGTGGCGGGGCATGGGTTTGAACCCCATGACGGTCGGAGTCTAG  
+  
FFFFFFFFFFFFFFFFFFFFFFFFFFFFFFFFFFFFFFFFFFFFFFFFFFFFFFFFFFFFFFFFFFFFFFFF  
F,FFFFFFFFFFFFFFFFFFFFFFFFFFFFFFFFFFFFFFFFFFFFFFFFFFFFFFFFFFFFFFFFFFFF  
@A00155:342:HHGFNDSXY:1:2571:8802:10535 1:N:0:GAACCTAG+TCCGCATA  
TTCTCTCGGGCCACAGCCTTACAGCTGTGGAGCACGGTATCCTCTGCCGAAACAGAGGTTGGACAAG

ACCGGAGGGGTCTCCTAGTTCCAAAGGAGATGTACTCCGGGCTTGTTACGACCTACCGTGTAAGTCG  
+  
FFFFFFFFFFFFFFFFFFFFFFFFFFFFFFFFFFFFFFFFFFFFFFFFFFFFFFFFFFFFFFFFFFFFFFFF  
FFFFFFFFFFFFFFFFFFFFFFFFFFFFFFFFFFFFFFFFFFFFFFFFFFFFFFFFFFFFFFFFFFFFFFFF  
@A00155:342:HHGFNDSXY:1:2571:22806:32816 1:N:0:GAACCTAG+TCCGCATA  
TTACAGCTGTGGAGCACGGTATCCTCTGCCGAAACAGAGGTTGGACAAGACCGGAGGGGTCTCCTAGT  
TCCAAAGGAGATGTACTCCGGGCTTGTTACGACCTACCGTGTAAGTCGTAGTCTAGTAGGCTACCTG  
+  
FFFFFFFFFFFFFFFFFFFFFFFFFFFFFFFFFFFFFFFFFFFFFFFFFFFFFFFFFFFFFFFFFFFFFFFF  
FFFFFFFFFFFFFFFFFFFFFFFFFFFFFFFFFFFFFFFFFFFFFFFFFFFFFFFFFFFFFFFFFFFFFFFF  
@A00155:342:HHGFNDSXY:1:2572:10077:5196 1:N:0:GAACCTAG+TCCGCATA  
TTCTCTCGGGCCACAGCCTTACAGCTGTGGAGCACGGTATCCTCTGCCGAAACAGAGGTTGGACAAG  
ACCGGAGGGGTCTCCTAGTTCCAAAGGAGATGTACTCCGGGCTTGTTACGACCTACCGTGTAAGTC  
+  
:FFF:FFFFFFFFFFF,F,F:FF:FFFFFFFFF::FFFFFFFFFFFFFFFFF:FFFFFFFFF:  
F::FFFF,F::FFFFFFFFFFFFFFFFF:FFFFFFFFF:FFFFFFFFFFF:FFF,FF,FFFF  
@A00155:342:HHGFNDSXY:1:2572:4110:14340 1:N:0:GAACCTAG+TCCGCATA  
CTCTGCCGAAACAGAGGTTGGACAAGACCGGAGGGGTCTCCTAGTTCCAAAGGAGATGTACTCCGGGC  
TTGTTACGACCTACCGTGTAAGTCGTAGTCTAGTAGGCTACCTGACGAGTCCTTTTAGGACGAAAC  
+  
FFFFFFFFFFFFF:FFFFFFFFFFFFFFFFFFFFFFFFFFFFFFFFF:FFFFFFFFFFFFFFFFFFFFF:FF,  
F:FFFFFFFFFFFFF:FFFFFFFFFFFFFFFFFFFFFFFFFFFFFFFFF:FFFFFF:FFFFFFFFFFFF  
@A00155:342:HHGFNDSXY:1:2572:4227:14418 1:N:0:GAACCTAG+TCCGCATA  
CTCTGCCGAAACAGAGGTTGGACAAGACCGGAGGGGTCTCCTAGTTCCAAAGGAGATGTACTCCGGGC  
TTGTTACGACCTACCGTGTAAGTCGTAGTCTAGTAGGCTACCTGACGAGTCCTTTTAGGACGAAAC  
+  
FFFFFFFFFFFFFFFFFFFFFFFFFFFFFFFFFFFFFFFFFFFFFFFFFFFFFFFFFFFFFFFFFFFFFFFF  
FFFFFFFFFFFFFFFFFFFFFFFFFFFFFFFFFFFFFFFFFFFFFFFFFFFFFFFFFFFFFFFFFFFFFFFF  
@A00155:342:HHGFNDSXY:1:2572:6696:16658 1:N:0:GAACCTAG+TCCGCATA  
CTCTGCCGAAACAGAGGTTGGACAAGACCGGAGGGGTCTCCTAGTTCCAAAGGAGATGTACTCCGGGC  
TTGTTACGACCTACCGTGTAAGTCGTAGTCTAGTAGGCTACCTGACGAGTCCTTTTAGGACGAAAC  
+  
:FFF::FFFFFFF,F:FFFFFFFFFFFF:FF::FFFFFFFFF:FFFFFFFFFFFFF,:FFFFFFF  
FFFFFFF:FFFFFFF,FFFFFFF,:FF,FFFF,F,FFFF:::FFFFFF:F,F,FFFF:FFFFFFF  
@A00155:342:HHGFNDSXY:1:2572:8802:18114 1:N:0:GAACCTAG+TCCGCATA  
TCTCTCGCCCTCCACATCCCTCTCGGCATTGAGATGACCATAGGCCAGAGGTGAGTCCTTAAGTGGAC  
ACAGCTGATCTAAGGCGGTGTGGTGGGGCATGGGTTTGAACCCCATGACGGTCGGAGTCTAGTAGGC  
+  
FFFFFFFFFFFFFFFFFFFFFFFFFFFFFFFFFFFFFFFFFFFFFFFFFFFFFFFFFFFFFFFFFFFFFFFF  
FFFFFFFFFFFFFFFFFFFFFFFFFFFFFFFFFFFFFFFFFFFFFFFFFFFFFFFFFFFFFFFFFFFFFFFF  
@A00155:342:HHGFNDSXY:1:2572:21504:24518 1:N:0:GAACCTAG+TCCGCATA  
CTTAGATCAGCTGTGTCCACTTAAGGACTCACCTCTGGCCTATGGTCATCTCAATGCCGAGAGGGATG  
TGAAGGGCGAGAGAGAGCGACTTCTCTCGGGCCACAGCCTTACAGCTGTGGAGCACGGTATCCTCTG  
+  
FFFFFFFFFFFFFFFFFFFFFFFFFFFFFFFFFFFFFFFFFFFFFFFFFFFFFFFFFFFFFFFFFFFFF:FFFFFFFFFFFFF::FFFFF::FF  
FFFFFFFFFFFFFFFFF:FFFFFFFFFFFFF:FFFFFFFFFFFFF:FFFFFFFFFFFFFFFFFFFFF  
@A00155:342:HHGFNDSXY:1:2572:15374:33160 1:N:0:GAACCTAG+TCCGCATA  
CTCAATGCCGAGAGGGATGTGGAGGGCGAGAGAGAGCGACTTCTCTCGGGCCACAGCCTTACAGCTG  
TGGAGCACGGTATCCTCTGCCGAAACAGAGGTTGGACAAGACCGGAGGGGTTTCTAGTTCCAAAGGA  
+  
FFFFFFFFFFFFFFFFFFFFF:FF:FFFFFFFFFFFFFFFFFFFFFFFFFFFFFFFFFFFFFFFFFFFFF  
FFFFFFFFFFFFFFFFFFFFFFFFFFFFFFFFFFFFFFFFFFFFFFFFFFFFFFFFFFFFFFFFFFFFF:FFF:FFFF  
@A00155:342:HHGFNDSXY:1:2573:29188:7200 1:N:0:GAACCTAG+TCCGCATA  
TCAATGCCGAGAGGGATGTGGAGGGCGAGAGAGAGCGACTTCTCTCGGGCCACAGCCTTACAGCTGT

GGAGCACGGTATCCTCTGCCGAAACAGAGGTTGGACAAGACCGGAGGGGTCTCCTAGTTCCAAAGGAG  
+  
FFFFFFFFFFFFFFFFFFFFFFFFFFFFFFFFFFFFFFFFFFFFFFFFFFFFFFFFFFFFFFFFFFFFFFFF  
FFFFFFFFFFFFFFFFFFFFFFFFFFFFFFFFFFFFFFFFFFFFFFFFFFFFFFFFFFFFFFFFFFFFFFFF  
@A00155:342:HHGFNDSXY:1:2573:13801:34444 1:N:0:GAACCTAG+TCCGCATA  
GGATGTAGAGGGCGAGAGAGAGCGACTTCTCTCGGGCCACAGCCTTACAGCTGTGGAGCACGGTATC  
CTCTGCCGAAACAGAGGTTGGACAAGACCGGAGGGGTCTCCTAGTTCCAAAGGAGATGTACTCC  
+  
FFFFFFFFFFFFFFFFFFFFFFFFFFFFFFFFFFFFFFFFFFFFFFFFFFFFFFFFFFFFFFFFFFFFFFFF  
FFFFFFFFFFFFFFFFFFFFFFFFFFFFFFFFFFFFFFFFFFFFFFFFFFFFFFFFFFFFFFFFFFFFFFFF  
@A00155:342:HHGFNDSXY:1:2573:26196:36119 1:N:0:GAACCTAG+TCCGCATA  
CTTCTCTCGGGCCACAGCCTTACAGCTGTGGAGCACGGTATCCTCTGCCGAAACAGAGGTTGGACAA  
GACCGGAGGGGTCTCCTAGTTCCAAAGGAGATGTACTCCGGGCTTGTTACGACCTACCGTGTAAGTC  
+  
FFFFFFFFFFFFFFFFFFFFFFFFFFFFFFFFFFFFFFFFFFFFFFFFFFFFFFFFFFFFFFFFFFFFFFFF  
FFFFFFFFFFFFFFFFFFFFFFFFFFFFFFFFFFFFFFFFFFFFFFFFFFFFFFFFFFFFFFFFFFFFFFFF  
@A00155:342:HHGFNDSXY:1:2574:12563:3082 1:N:0:GAACCTAG+TCCGCATA  
GAGAGGGATGTGGAGGGCGAGAGAGAGCGACTTCTCTCGGGCCACAGCCTTACAGCTGTGGAGCACG  
GTATCCTCTGCCGAAACAGAGGTTGGACAAGACCGGAGGGGTCTCCTAGTTCCAAAGGAGATGTACTC  
+  
FFFFFFFFFFFFFFFFFFFFFFFFFFFFFFFFFFFFFFFFFFFFFFFFFFFFFFFFFFFFFFFFFFFFFFFF  
FFFFFFFFFFFFFFFFFFFFFFFFFFFFFFFFFFFFFFFFFFFFFFFFFFFFFFFFFFFFFFFFFFFFFFFF  
@A00155:342:HHGFNDSXY:1:2574:25102:34788 1:N:0:GAACCTAG+TCCGCATA  
GCTGTGGGCGGAGAGAAGTCGCTCTCTCTCGCCCTCCACATCCCTCTCGGCATTGAGATGACCATAG  
GCCAGAGGTGAGTCCTTAAGTGGACACAGCTGATCTAAGGCGGTGTGGCGGGGCATGGGTTTGAACCC  
+  
FFFFFFFFFFFFFFFFFFFFFFFFFFFFFFFFFFFFFFFFFFFFFFFFFFFFFFFFFFFFFFFFFFFFFFFF  
FFFFFFFFFFFFFFFFFFFFFFFFFFFFFFFFFFFFFFFFFFFFFFFFFFFFFFFFFFFFFFFFFFFFFFFF  
@A00155:342:HHGFNDSXY:1:2575:27679:10755 1:N:0:GAACCTAG+TCCGCATA  
GAGGGCGAGAGAGAGCGACTTCTCTCGGGCCACAGCCTTACAGCTGTGGAGCACGGTATCCTCTGCC  
GAAACAGAGGTTGGACAAGACCGAAGGGGTCTCCTAGTTCCAAAGGAGATGTACTCCGGGCTTGTTCA  
+  
FFFFFFFFFFFFFFFFFFFF:FFFFFFFFFFFFFFFFFFFFFFFFFFFFFFFFFFFFFFFFFFFFFFFFFFFF  
:FFFFFFFFFFFFFFFFFFFFFFFFFFFFFFFFFFFFFFFFFFFFFFFFFFFFFFFFFFFFFFFFFFFF,FFF  
@A00155:342:HHGFNDSXY:1:2575:11650:15374 1:N:0:GAACCTAG+TCCGCATA  
TAGACTACGACTTACACGGTAGGTCTGAACAAGCCCGGAGTACATCTCCTTTGGAAGTAGGAGACCC  
CTCCGGTCTTGTTCAACCTCTGTTTCGGCAGAGGATACCGTGCTCCACAGCTGTAAGGCTGTGGGCCC  
+  
FFFFFFFFFFFFFFFFFFFFFFFFFFFFFFFFFFFFFFFFFFFFFFFFFFFFFFFFFFFFFFFFFFFFFFFF  
FFFFFFFFFFFFFFFFFFFFFFFFFFFFFFFFFFFFFFFFFFFFFFFFFFFFFFFFFFFFFFFFFFFFFFFF  
@A00155:342:HHGFNDSXY:1:2575:31539:21418 1:N:0:GAACCTAG+TCCGCATA  
GTCATCTCAATGCCGAGAGGGATGTGGAGGGCGAGAGAGAGCGACTTCTCTCGGGCCACAGCCTTAC  
AGCTGTGGAGCACGGTATCCTCTGCCGAAACAGAGGTTGGACAAGACCGGAGGGGTCTCCTGTTCCA  
+  
FFFFFFFFFFFFFFFFFFFFFFFFFFFFFFFFFFFFFFFFFFFFFFFFFFFFFFFFFFFFFFFFFFFFFFFF  
FFFFFFFFFFFFFFFFFFFFFFFFFFFFFFFFFFFFFFFFFFFFFFFFFFFFFFFFFFFFFFFFFFFFFFFF  
@A00155:342:HHGFNDSXY:1:2575:15176:31407 1:N:0:GAACCTAG+TCCGCATA  
GGGCGAGAGAGAGCGACTTCTCTCGGGCCACAGCCTTACAGCTGTGGAGCACGGTATCCTCTGCCGA  
AACAGAGGTTGGACAAGACCGGAGGGGTCTCCTGTTCCAAAGGAGATGTACTCCGGGCTTGTTACG  
+  
FFFFFFFFFFFFFFFFFFFFFFFFFFFFFFFFFFFFFFFFFFFFFFFFFFFFFFFFFFFFFFFFFFFFFFFF  
FFFFFFFFFFFFFFFFFFFF:FFFFFFFFFFFFFFFFFFFFFFFFFFFFFFFFFFFFFFFFFFFFFFFFFFFF  
@A00155:342:HHGFNDSXY:1:2575:3224:35039 1:N:0:GAACCTAG+TCCGCATA  
TTCTCTCGGGCCACAGCCTTACAGCTGTGGAGCACGGTATCCTCTGCCGAAACAGAGGTTGGACAAG

ACCGGAGGGGTCTCCTAGTTCCAAAGGAGATGTACTCCGGGCTTGTTACGACCTACCGTGTAAGTCG  
+  
FFFFFFFFFFFFFFFFFFFFFFFFFFFFFFFFFFFFFFFFFFFFFFFFFFFFFFFFFFFFFFFFFFFFFFFF  
FFFFFFFFFFFFFFFFFFFFFFFFFFFFFFFFFFFFFFFFFFFFFFFFFFFFFFFFFFFFFFFFFFFFFFFF  
@A00155:342:HHGFNDSXY:1:2575:28085:35916 1:N:0:GAACCTAG+TCCGCATA  
GTCCACTTAAGGACTCACCTCTGGCCTATGGTCATCTCAATGCCGAGAGGGATGTGGAGGGCGAGAGA  
GAGCGACTTCTCTCGGGCCACAGCCTTACAGCTGTGGAGCACGGTATCCTCTGCCGAAACAGAGGTT  
+  
FFFFFFFFFFFFFFFFFFFFFFFFFFFFFFFFFFFFFFFFFFFFFFFFFFFFFFFFFFFFFFFFFFFFFFFF  
FFFFFFFFFFFFFFFFFFFFFFFFFFFFFFFFFFFFFFFFFFFFFFFFFFFFFFFFFFFFFFFFFFFFFFFF  
@A00155:342:HHGFNDSXY:1:2576:23176:27790 1:N:0:GAACCTAG+TCCGCATA  
CAATGCCGAGAGGGATGTGGAGGGCGAGAGAGAGCGACTTCTCTCGGGCCACAGCCTTACAGCTGTG  
GAGCACGGTATCCTCTGCCGAAACAGAGGTTGGACAAGACCGGAGGGGTCTCCTAGTTCCAAAGGAGA  
+  
FFFFFFFFFFFFFFFFFFFFFFFFFFFFFFFFFFFFFFFFFFFFFFFFFFFFFFFFFFFFFFFFFFFFFFFF  
FFFFFFFFFFFFFFFFFFFFFFFFFFFFFFFFFFFFFFFFFFFFFFFFFFFFFFFFFFFFFFFFFFFFFFFF  
@A00155:342:HHGFNDSXY:1:2576:12283:31501 1:N:0:GAACCTAG+TCCGCATA  
CTTCTCTCGGGCCACAGCCTTACAGCTGTGGAGCACGGTATCCTCTGCCGAAACAGAGGTTGGACAA  
GACCGGAGGGGTCTCCTAGTTCCAAAGGAGATGTACTCCGGGCTTGTTACGACCTACCGTGTAAGTC  
+  
FFFFFFFFFFFFFFFFFFFFFFFFFFFFFFFFFFFFFFFFFFFFFFFFFFFFFFFFFFFFFFFFFFFFFFFF  
FFFFFFFFFFFFFFFFFFFFFFFFFFFFFFFFFFFFFFFFFFFFFFFFFFFFFFFFFFFFFFFFFFFFFFFF  
@A00155:342:HHGFNDSXY:1:2577:15031:6981 1:N:0:GAACCTAG+TCCGCATA  
GAGCGACTTCTCTCGGGCCACAGCCTTACAGCTGTGGAGCACGGTATCCTCTGCCGAAACAGAGGTT  
GGACAAGACCGGAGGGGTCTCCTAGTTCCAAAGGAGATGTACTCCGGGCTTGTTACGACCTACCGTG  
+  
FFFFFFFFFFFFFFFFFFFFFFFFFFFFFFFFFFFFFFFFFFFFFFFFFFFFFFFFFFFFFFFFFFFFFFFF  
FFFFFFFFFFFFFFFFFFFFFFFFFFFFFFFFFFFFFFFFFFFFFFFFFFFFFFFFFFFFFFFFFFFFFFFF  
@A00155:342:HHGFNDSXY:1:2577:18249:21198 1:N:0:GAACCTAG+TCCGCATA  
GAGCGACTTCTCTCGGGCCACAGCCTTACAGCTGTGGAGCACGGTATCCTCTGCCGAAACAGAGGTT  
GGACAAGACCGGAGGGGTCTCCTAGTTCCAAAGGAGATGTACTCCGGGCTTGTTACGACCTACCGTG  
+  
FFFFFFFFFFFFFFFFFFFFFFFFFFFFFFFFFFFFFFFFFFFFFFFFFFFFFFFFFFFFFFFFFFFFFFFF  
FFFFFFFFFFFFFFFFFFFFFFFFFFFFFFFFFFFFFFFFFFFFFFFFFFFFFFFFFFFFFFFFFFFFFFFF  
@A00155:342:HHGFNDSXY:1:2577:31611:27367 1:N:0:GAACCTAG+TCCGCATA  
CGAGAGGGATGTAGAGGGCGAGAGAGAGCGACTTCTCTCGGGCCACAGCCTTACAGCTGTGGAGCAC  
GGTATCCTCTGCCGAAACAGAGGTTGGACAAGACCGGAGGGGTCTCCTAGTTCCAAAGGAGATGTACT  
+  
FFFFFFFF,FF:FFFFFFFFFFFFFFFF,F:FFFFFFFFFFFFFFFFFFFFFFFFFFFFFFFF,F  
FFFFFFFFFFFFFFFFFFFFFFFFFFFFFFFFFFFFFFFFFFFFFFFFFFFFFFFFFFFFFFFFFFFFFFFF  
@A00155:342:HHGFNDSXY:1:2578:16188:7326 1:N:0:GAACCTAG+TCCGCATA  
CTATGGTCATCTCAATGCCGAGAGGGATGTGGAGGGCGAGAGAGAGCGACTTCTCTCGGGCCACAGC  
CTTACAGCTGTGGAGCACGGTATCCTCTGCCGAAACAGAGGTTGGACAAGACCGGAGGGGTCTCCTAG  
+  
FFFFFFFFFFFFFFFFFFFFFFFFFFFFFFFFFFFFFFFFFFFFFFFFFFFFFFFFFFFFFFFFFFFFFFFF  
FFFFFFFFFFFFFFFFFFFFFFFFFFFFFFFFFFFFFFFFFFFFFFFFFFFFFFFFFFFFFFFFFFFFFFFF:  
@A00155:342:HHGFNDSXY:1:2578:32127:14074 1:N:0:GAACCTAG+TCCGCATA  
AGAGAGAGCGACTTCTCTCGGGCCACAGCCTTACAGCTGTGGAGCACGGTATCCTCTGCCGAAACAG  
AGGTTGGACAAGACCGGAGGGGTCTCCTAGTTCCAAAGGAGATGTACTCCGGGCTTGTTACGACCTA  
+  
FFFFFFFFFFFFFFFFFFFFFFFFFFFFFFFFFFFFFFFFFFFFFFFFFFFFFFFFFFFFFFFFFFFFFFFF  
FFFFFFFFFFFF,FFFFFFFFF:FFFFFFFFFFFF:FFFFFFFFFFFFFFFFFFFFFFFFFFFFFFFF  
@A00155:342:HHGFNDSXY:1:2578:16459:24706 1:N:0:GAACCTAG+TCCGCATA  
GGATGTAGAGGGCGAGAGAGAGCGACTTCTCTCGGGCCACAGCCTTACAGCTGTGGAGCACGGTATC



CTCTGCCGAAACAGAGGTTGGACAAGACCGGAGGGGTCTCCTAGTTCCAAAGGAGATGTACTCC  
+  
FFFFFFFFFFFFFFFFFFFFFFFFFFFFFFFFFFFFFFFFFFFFFFFFFFFFFFFFFFFFFFFFFFFFFFFF  
FFFFFFFFFFFFFFFFFFFFFFFFFFFFFFFFFFFFFFFFFFFFFFFFFFFFFFFFFFFFFFFFFFFFFFFF  
@A00155:342:HHGFNDSXY:1:2578:2139:25394 1:N:0:GAACCTAG+TCCGCATA  
TTACAGCTGTGGAGCACGGTATCCTCTGCCGAAACAGAGGTTGGACAAGACCGGAGGGGTCTCCTAGT  
TCCAAAGGAGATGTACTCCGGGCTTGTTACGACCTACCGTGTAAGTCGTAGTCTAGTAGGCTACCT  
+  
FFFFFFFFFFFFFFFFFFFFFFFFFFFFFFFFFFFFFFFFFFFFFFFFFFFFFFFFFFFFFFFFFFFFFFFF  
FFFFFFFFFFFFFFFFFFFFFFFFFFFFFFFFFFFFFFFFFFFFFFFFFFFFFFFFFFFFFFFFFFFFFFFF  
@A00155:342:HHGFNDSXY:1:2578:4092:35415 1:N:0:GAACCTAG+TCCGCATA  
ATGCCGAGAGGGATGTGGAGGGCGAGAGAGAGCGACTTCTCTCGGGCCACAGCCTTACAGCTGTGGA  
GCACGGTATCCTCTGCCGAAACAGAGGTTGGACAAGACCGGAGGGGTCTCCTAGTTCCAAAGGAGATG  
+  
FFFFFFFFFFFFFFFFFFFFFFFFFFFFFFFFFFFFFFFFFFFFFFFFFFFFFFFFFFFFFFFFFFFFFFFF  
FFFFFFFFFFFFFFFFFFFFFFFFFFFFFFFFFFFFFFFFFFFFFFFFFFFFFFFFFFFFFFFFFFFFFFFF  
@A00155:342:HHGFNDSXY:1:2578:14299:36338 1:N:0:GAACCTAG+TCCGCATA  
AGAGAGAGCGACTTCTCTCGGGCCACAGCCTTACAGCTGTGGAGCACGGTATCCTCTGCCGAAACAG  
AGGTTGGACAAGACCGGAGGGGTCTCCTAGTTCCAAAGGAGATGTACTCCGGGCTTGTTACGACCTA  
+  
FFFFFFFFFFFFFFFFFFFFFFFFFFFFFFFFFFFFFFFFFFFFFFFFFFFFFFFFFFFFFFFFFFFFFFFF  
FFFFFFFFFFFFFFFFFFFFFFFFFFFFFFFFFFFFFFFFFFFFFFFFFFFFFFFFFFFFFFFFFFFFFFFF:  
@A00155:342:HHGFNDSXY:1:2601:32108:14544 1:N:0:GAACCTAG+TCCGCATA  
GGATGTAGAGGGCGAGAGAGAGCGACTTCTCTCGGGCCACAGCCTTACAGCTGTGGAGCACGGTATC  
CTCTGCCGAAACAGAGGTTGGACAAGACCGGAGGGGTCTCCTAGTTCCAAAGGAGATGTACTCC  
+  
F::FFFFFFFFFFFFFFFFFFFFFFFFFFFFFFFFFFFFFFFFFFFFFFFFFFFFFFFFFFFFFFFF:  
,,FF:F:FFFFFFFFFFFFFFFFFFFFFFFFFFFFFFFFFFFFFFFFFFFFFFFFFFFFFFFF:  
@A00155:342:HHGFNDSXY:1:2601:16776:21903 1:N:0:GAACCTAG+TCCGCATA  
TGTGGAGGGCGAGAGAGAGCGACTTCTCTCGGGCCACAGCCTTACAGCTGTGGAGCACGGTATCCTC  
TGCCGAAACAGAGGTTGGACAAGACCGGAGGGGTCTCCTAGTTCCAAAGGAGATGTACTCCGGG  
+  
F:FFFFFFFFFFFFFFFFFFFFFFFFFFFFFFFFFFFFFFFFFFFFFFFFFFFFFFFFFFFFFFFF  
FFFFFFFFFFFFFFFFFFFFFFFFFFFFFFFFFFFFFFFFFFFFFFFFFFFFFFFFFFFFFFFF  
@A00155:342:HHGFNDSXY:1:2601:14064:31046 1:N:0:GAACCTAG+TCCGCATA  
GGATGTGGAGGGCGAGAGAGAGCGACTTCTCTCGGGCCACAGCCTTACAGCTGTGGAGCACGGTATC  
CTCTGCCGAAACAGAGGTTGGACAAGACCGGAGGGGTCTCCTAGTTCCAAAGGAGATGTACTCC  
+  
FFFFFFFFFFFFFFFFFFFFFFFFFFFFFFFFFFFFFFFFFFFFFFFFFFFFFFFFFFFFFFFF  
FFFFFFFFFFFFFFFFFFFFFFFFFFFFFFFFFFFFFFFFFFFFFFFFFFFFFFFFFFFFFFFF  
@A00155:342:HHGFNDSXY:1:2601:2392:31626 1:N:0:GAACCTAG+TCCGCATA  
GTCATCTCAATGCCGAGAGGGATGTGGAGGGCGAGAGAGAGCGACTTCTCTCGGGCCACAGCCTTAC  
AGCTGTGGAGCACGGTATCCTCTGCCGAAACAGAGGTTGGACAAGACCGGAGGGGTCTCCAAGTTCCA  
+  
FFFFFFFFFFFFFFFFFFFFFFFFFFFFFFFFFFFFFFFFFFFFFFFFFFFFFFFFFFFFFFFF:  
:FFFFFFFFFFFFFFFFFFFFFFFFFFFFFFFFFFFFFFFFFFFFFFFFFFFFFFFF:FFFFF  
@A00155:342:HHGFNDSXY:1:2601:16468:31704 1:N:0:GAACCTAG+TCCGCATA  
CAGCCTTACAGCTGTGGAGCACGGTATCCTCTGCCGAAACAGAGGTTGGACAAGACCGGAGGGGTCTC  
CTAGTTCCAAAGGAGATGTACTCCGGGCTTGTTACGACCTACCGTGTAAGTCGTAGTCTAGTAGGCT  
+  
FFFFFFFFFFFFFFFFFFFFFFFFFFFFFFFFFFFFFFFFFFFFFFFFFFFFFFFFFFFFFFFF  
FFFFFFFFFFFFFFFFFFFFFFFFFFFFFFFFFFFFFFFFFFFFFFFFFFFFFFFFFFFFFFFF  
@A00155:342:HHGFNDSXY:1:2602:28944:14888 1:N:0:GAACCTAG+TCCGCATA  
TTAAGGACTCTCCTCTGGCCTATGGTCATCTCAATGCCGAGAGGGATGTGGAGGGCGAGAGAGAGCGA

CTTCTCTCGGGCCACAGCCTTACAGCTGTGGAGCACGGTATCCTCTGCCGAAACAGAGGTTGGACAA  
+  
FFFFFFFFFFFFFFFFFFFFFFFFFFFFFFFFFFFFFFFFFFFFFFFFFFFFFFFFFFFFFFFFFFFFFFFF  
FFFFFFFFFFFFFFFFFFFFFFFFFFFFFFFFFFFFFFFFFFFFFFFFFFFFFFFFFFFFFFFFFFFFFFFF  
@A00155:342:HHGFNDSXY:1:2602:29884:15264 1:N:0:GAACCTAG+TCCGCATA  
GAGCGACTTCTCTCGGGCCACAGCCTTACAGCTGTGGAGCACGGTATCCTCTGCCGAAACAGAGGTT  
GGACAAGACCGGAGGGGTCTCCTAGTTCAAAGGAGATGTACTCCGGGCTTGTTACGACCTACCGTG  
+  
FFFFFFF:FFFFFFFFFFFFFFFFFFFFFFFFFFFFFFFFFFFFFFFFFFFFFFFFFFFFFFFFFFFFFFF  
FFFFFFFFFFFFFFFFFFFFFFFFFFFFFFFFFFFFFFFFFFFFFFFFFFFFFFFFFFFFFFFFFFFFFFFF  
@A00155:342:HHGFNDSXY:1:2602:2862:16157 1:N:0:GAACCTAG+TCCGCATA  
GTATCCTCTGCCGAAACAGAGGTTGGACAAGACCGGAGGGGTCTCCTAGTTCAAAGGAGATGTACTC  
CGGGCTTGTTACGACCTACCGTGTAAGTCGTAGTCTAGTAGGCTACCTGACGAGTCCTTTTATAGGAC  
+  
FFFFFFFFFFFFFFFFFFFFFFFFFFFF,FFFF,FFFFFFFFFFFFFFFFFFFFFFFFFFFFFFFFFFFF:FFFFF  
FFF,FFFFFFFFF:FFFFFFFFFFFFFFFFFFFFFFFFFFFFFFFFFFFFFFFFFFFF:FFFFFFFFF,FFFFFFF:F  
@A00155:342:HHGFNDSXY:1:2603:15700:2127 1:N:0:GAACCTAG+TCCGCATA  
AGAGAGAGCGACTTCTCTCGGGCCACAGCCTTACAGCTGTGGAGCACGGTATCCTCTGCCGAAACAG  
AGGTTGGACAAGACCGGAGGGGTCTCCTAGTTCAAAGGAGATGTACTCCGGGCTTGTTACGACCTA  
+  
FFFFFFFFFFFFFFFFFFFFFFFFFFFFFFFFFFFFFFFFFFFFFFFFFFFFFFFFFFFFFFFFFFFFFFFF  
FFFFFFFFFFFFFFFFFFFFFFFFFFFFFFFFFFFFFFFFFFFFFFFFFFFFFFFFFFFFFFFFFFFFFFFF:  
@A00155:342:HHGFNDSXY:1:2603:28302:7795 1:N:0:GAACCTAG+TCCGCATA  
GGACTCACCTCTGGCCTATGGTCATCTCAATGCCGAGAGGGATGTGAAGGGCGAGAGAGAGCGACTTC  
TCTCGGGCCACAGCCTTACAGCTGTGGAGCACGGTATCCTCTGCCGAAACAGAGGTTGGACAAGACC  
+  
FFFFFFFFFFFFFFFFFFFFFFFFFFFFFFFFFFFFFFFFFFFFFFFFFFFFFFFFFFFFFFFFFFFFFFFF  
FFFFFFFFFFFFFFFFFFFFFFFFFFFFFFFFFFFFFFFFFFFFFFFFFFFFFFFFFFFFFFFFFFFFFFFF:  
@A00155:342:HHGFNDSXY:1:2603:8169:8844 1:N:0:GAACCTAG+TCCGCATA  
CTTCTCTCGGGCCACAGCCTTACAGCTGTGGAGCACGGTATCCTCTGCCGAAACAGAGGTTGGACAA  
GACCGGAGGGGTCTCCTAGTTCAAAGGAGATGTACTCCGGGCTTGTTACGACCTACCGTGTAAGTC  
+  
FFFFFFFFFFFFFFFFFFFFFFFFFFFFFFFFFFFFFFFFFFFFFFFFFFFFFFFFFFFFFFFFFFFFFFFF  
FFFFFFFFFFFFFFFFFFFFFFFFFFFFFFFFFFFFFFFFFFFFFFFFFFFFFFFFFFFFFFFFFFFFFFFF  
@A00155:342:HHGFNDSXY:1:2603:15465:14967 1:N:0:GAACCTAG+TCCGCATA  
CTCAATGCCGAGAGGGATGTGGAGGGCGAGAGAGAGCGACTTCTCTCGGGCCACAGCCTTACAGCTG  
TGGAGCACGGTATCCTCTGCCGAAACAGAGGTTGGACAAGACCGGAGGGGTCTCCTAGTTCAAAGGA  
+  
FFFFFFFFFFFFFFFFFFFF:FFFFFFFFFFFFFFFFFFFFFFFFFFFFFFFFFFFFFFFFFFFFFFFFFFFF  
FFFFFFFFFFFF:FFFFFFFFFFFFFFFFFFFFFFFFFFFFFFFFFFFF:FFFFFFFFFFFFFFFFFFFFF  
@A00155:342:HHGFNDSXY:1:2604:2519:5259 1:N:0:GAACCTAG+TCCGCATA  
AGAGAGAGCGACTTCTCTCGGGCCACAGCCTTACAGCTGTGGAGCACGGTATACTCTGCCGAAACAG  
AGGTTGGACAAGACCGGAGGGGTCTCCTAGTTCAAAGGAGATGTACTCCGGGCTTGTTACGACCTA  
+  
FFFFF,FFFFF,FFFFFFFFF:F:FFFFFFFFFFFFFFFFFFFFF:FFFF:FFF,FFFFFFFFFFFFF  
FFFFFFFFFFFF:FFFFFF:,FFFFFFFFFFFFFFFFFFFFF,FFFFFFFFFFFF,FFFFFFFFFFFFF  
@A00155:342:HHGFNDSXY:1:2604:24777:7858 1:N:0:GAACCTAG+TCCGCATA  
TCTGTTTCGGCAGAGGATACCGTGCTCCACAGCTGTAAGGCTGTGGGCCCCGAGAGAAGTCGCTCTCTC  
TCGCCCTCCACATCCCTCTCGGCATTGAGATGACCATAGGCCAGAGGAGATCCTTAAGTG  
+  
FFFFFFFFFFFFFFFFFFFFFFFFFFFFFFFFFFFFFFFFFFFF:FFFFFFFFFFFFFFFFFFFFFFFFFFFF  
FFFFFFFFFFFFFFFFFFFFFFFFFFFF:FFFFFFF,FFFFFFFFFFFFFFFFF:FFFFFFFFFFFF:  
@A00155:342:HHGFNDSXY:1:2604:23520:9251 1:N:0:GAACCTAG+TCCGCATA  
TGCCGAGAGGGATGTAGAGGGCGAGAGAGAGCGACTTCTCTCGGGCCACAGCCTTACAGCTGTGGAG

CACGGTATCCTCTGCCGAAACAGAGGTTGGACAAGACCGGAGGGGTCTCCTAGTTCCAAAGGAGATGT  
+  
FFFFFFFFFFFFFFFFFFFFFFFFFFFFFFFFFFFFFFFFFFFFFFFFFFFFFFFFFFFFFFFFFFFFFFFFFFFF  
FFFFFFFFFFFFFFFFFFFFFFFFFFFFFFFFFFFFFFFFFFFFFFFFFFFFFFFFFFFFFFFFFFFFFFFFFFFF  
@A00155:342:HHGFNDSXY:1:2604:11225:13103 1:N:0:GAACCTAG+TCCGCATA  
GATCAGCTGTGTCCACTTAAGGACTCACCTCTGGCCTATGGTCATCTCAATGCCGAGAGGGATGTGGA  
GGGCGAGAGAGAGCGACTTCTCTCGGGCCACAGCCTTACAGCTGTGGAGCACGGTATCCTCTGCCGA  
+  
FF:FFFFFFFFFFFFFFFFFFFFFFFFFFFFFFFFFFFFFFFFFFFFFFFFFFFFFFFFFFFFFFFFFFFFFFFF  
FFFFFFFFFFFFFFFFFFFFFFFFFFFFFFFFFFFFFFFFFFFFFFFFFFFFFFFFFFFFFFFFFFFFFFFFFFFF:FFFFFFFFFFFF  
@A00155:342:HHGFNDSXY:1:2604:11722:13213 1:N:0:GAACCTAG+TCCGCATA  
GATCAGCTGTGTCCACTTAAGGACTCACCTCTGGCCTATGGTCATCTCAATGCCGAGAGGGATGTGGA  
GGGCGAGAGAGAGCGACTTCTCTCGGGCCACAGCCTTACAGCTGTGGAGCACGGTATCCTCTGCCGA  
+  
FFFFF:FFFFF:FFFFFFFFFFF:FFFF,FFFFFFFFFFFFFFFFFFFFFFFFFFFFFFFFFFFFFFFF,FFFFF,FFF  
FFFFFFFF:FF:FFFF:FFFFF,F:FF:FFFF:F:FFFFFFFFFFFFFFFFFFFFFFFFFFFFFFFFFFFF:FF:  
@A00155:342:HHGFNDSXY:1:2604:15266:18944 1:N:0:GAACCTAG+TCCGCATA  
GTCATCTCAATGCCGAGAGGGATGTGGAGGGCGAGAGAGAGCGACTTCTCTCGGGCCACAGCCTTAC  
AGCTGTGGAGCACGGTATCCTCTGCCGAAACAGAGGTTGGACAAGACCGGAGGGGTCTCCTAGTTCCA  
+  
FFFFFFFFFFFFFFFFFFFFFFFFFFFFFFFFFFFFFFFFFFFFFFFFFFFFFFFFFFFFFFFFFFFFFFFFFFFF:FFFFFFFFFFFFFFFFFFFF:FFF  
FFFFFFFFFFFFFFFFFFFFFFFFFFFFFFFFFFFFFFFFFFFFFFFFFFFFFFFFFFFFFFFFFFFFFFFFFFFF:FFFFFFFFFFFFFFFFFFFF  
@A00155:342:HHGFNDSXY:1:2604:14742:22326 1:N:0:GAACCTAG+TCCGCATA  
GCCGAGAGGGATGTAGAGGGCGAGAGAGAGCGACTTCTCTCGGGCCACAGCCTTACAGCTGTGGAGC  
ACGGTATCCTCTGCCGAAACAGAGGTTGGACAAGACCGGAGGGGTCTCCTAGTTCCAAAGGAGATGT  
+  
:FFFFF,F::F,:FFFF:FFFFFFFFFFFFFFFFFFFFFFFFFFFFFFFFFFFF:::FFFFF,FFF:FFFF:F,:FFFF  
FF::FFF:F:FF:FFFFF:::FFFFF:FFFF,FFF,FF:::,FFFF,,FFFFF,FFF:,FFFFFFF  
@A00155:342:HHGFNDSXY:1:2604:13982:23954 1:N:0:GAACCTAG+TCCGCATA  
TGCCGAGAGGGATGTAGAGGGCGAGAGAGAGCGACTTCTCTCGGGCCACAGCCTTACAGCTGTGGAG  
CACGGTATCCTCTGCCGAAACAGAGGTTGGACAAGACCGGAGGGGTCTCCTAGTTCCAAAGGAGATGT  
+  
FFFFFFFFFFFFFFFFFFFFFFFFFFFFFFFFFFFFFFFFFFFFFFFFFFFFFFFFFFFFFFFFFFFFFFFFFFFF  
FFFFFFFFFFFFFFFFFFFFFFFFFFFFFFFFFFFFFFFFFFFFFFFFFFFFFFFFFFFFFFFFFFFFFFFFFFFF  
@A00155:342:HHGFNDSXY:1:2604:18783:27915 1:N:0:GAACCTAG+TCCGCATA  
GAGCGACTTCTCTCGGGCCACAGCCTTACAGCTGTGGAGCACGGTATCCTCTGCCGAAACAGAGGTT  
GGACAAGACCGGAGGGGTCTCCTAGTTCCAAAGGAGATGTACTCCGGGCTTGTTACGACCTACCGTG  
+  
FFFFFFFFFFFFFFFFFFFFFFFFFFFFFFFFFFFFFFFFFFFFFFFFFFFFFFFFFFFFFFFFFFFFFFFFFFFF  
FFFFFFFFFFFFFFFFFFFFFFFFFFFFFFFFFFFFFFFFFFFFFFFFFFFFFFFFFFFFFFFFFFFFFFFFFFFF  
@A00155:342:HHGFNDSXY:1:2604:29405:33912 1:N:0:GAACCTAG+TCCGCATA  
AAGGACTCACCTCTGGCCTATGGTCATCTCAATGCCGAGAGGGATGTGAAGGGCGAGAGAGAGCGACT  
TCTCTCGGGCCACAGCCTTACAGCTGTGGAGCACGGTATCCTCTGCCGAAACAGAGGTTGGACAAGA  
+  
FFFFFFFFFFFFFFFFFFFFFFFFFFFFFFFFFFFFFFFFFFFFFFFFFFFFFFFFFFFFFFFFFFFFFFFFFFFF  
FFFFFFFFFFFFFFFFFFFFFFFFFFFFFFFFFFFFFFFFFFFFFFFFFFFFFFFFFFFFFFFFFFFFFFFFFFFF  
@A00155:342:HHGFNDSXY:1:2604:26729:35603 1:N:0:GAACCTAG+TCCGCATA  
GGTTGGACAAGACCGGAGGGGTCTCCTAGTTCCAAAGGAGATGTACTCCGGGCTTGTTACGACCTAC  
CGTGTAAGTCGTAGTCTAGTAGGCTACCTGACGAGTCCTTTTTAGGACGAACTTACACAACCTCGAAG  
+  
FFFFFFFFFFFFFFFFFFFFFFFFFFFFFFFFFFFFFFFFFFFFFFFFFFFFFFFFFFFFFFFFFFFFFFFFFFFF  
FFFFFFFFFFFFFFFFFFFFFFFFFFFFFFFFFFFFFFFFFFFFFFFFFFFFFFFFFFFFFFFFFFFFFFFFFFFF:FFFFFFFFFFFFFFFFFFFF:FFFFF  
@A00155:342:HHGFNDSXY:1:2605:15329:10441 1:N:0:GAACCTAG+TCCGCATA  
CTTCTCTCGGGCCACAGCCTTACAGCTGTGGAGCACGGTATCCTCTGCCGAAACAGAGGTTGGACAA

GACCGGAGGGGTCTCCTAGTTCCAAAGGAGATGTACTCCGGGCTTGTTACGACCTACCGTGTAAGTC  
+  
F, FFFFFFFFFFFFFFFFFFFFFFFFFFFFFFFFFFFFFFFFFFFFFFFFFFFFFFFFFFFFFFFFFFFFFFFFFF  
FFFFFFFFFFFFFFFFFFFFFFFFFFFFFFFFFFFFFFFFFFFFFFFFFFFFFFFFFFFFFFFFFFFFFFFFFFFF  
@A00155:342:HHGFNDSXY:1:2605:21739:15906 1:N:0:GAACCTAG+TCCGCATA  
CTTCTCTCGGGCCCACAGCCTTACAGCTGTGGAGCACGGTATCCTCTGCCGAAACAGAGGTTGGACAA  
GACCGGAGGGGTCTCCTAGTTCCAAAGGAGATGTACTCCGGGCTTGTTACGACCTACCGTGTAAGTC  
+  
FFFFFFFFFFFFFFFFFFFFFFFFFFFFFFFFFFFFFFFFFFFFFFFFFFFFFFFFFFFFFFFFFFFFFFFFFFFF  
FFFFFFFFFFFFFFFFFFFFFFFFFFFFFFFFFFFFFFFFFFFFFFFFFFFFFFFFFFFFFFFFFFFFFFFFFFFF  
@A00155:342:HHGFNDSXY:1:2605:18954:24298 1:N:0:GAACCTAG+TCCGCATA  
GAGCGACTTCTCTCGGGCCCACAGCCTTACAGCTGTGGAGCACGGTATCCTCTGCCGAAACAGAGGTT  
GGACAAGACCGGAGGGGTCTCCTAGTTCCAAAGGAGATGTACTCCGGGCTTGTTACGAC  
+  
FFFFFFFFFFFFFFFFFFFF:FFFFFFFF:FFFFFFFFFFFFFFFFFFFFFFFFFFFFFFFFFFFFFFFFFFFFF  
FFFFFFFFFFFFFFFF:FFFFFFFFFFFFFFFFFFFFFFFFFFFFFFFFFFFFFFFFFFFFFFFFFFFFFFFFF  
@A00155:342:HHGFNDSXY:1:2605:20356:33802 1:N:0:GAACCTAG+TCCGCATA  
GAGAGGGATGTGGAGGGCGAGAGAGAGCGACTTCTCTCGGGCCCACAGCCTTACAGCTGTGGAGCACG  
GTATCCTCTGCCGAAACAGAGGTTGGACAAGACCGGAGGGGTCTCCTAGTTCCAAAGGAGATGTACTC  
+  
FFFFFFFFFFFFFFFFFFFFFFFFFFFFFFFFFFFFFFFFFFFFFFFFFFFFFFFFFFFFFFFFFFFFFFFFFFFF  
FFFFFFFFFFFFFFFFFFFF:FFFFFFFFFFFFFFFFFFFFFFFFFFFFFFFFFFFF:FFFFFFFFFFFFFFFFFFFF  
@A00155:342:HHGFNDSXY:1:2606:27281:2237 1:N:0:GAACCTAG+TCCGCATA  
ATCTCAATGCCGAGAGGGATGTGGAGGGCGAGAGAGAGCGACTTCTCTCGGGCCCACAGCCTTACAGC  
TGTGGAGCACGGTATCCTCTGCCGAAACAGAGGTTGGACAAGATCGGAGGGGTCTCCTAGTTCCAAAG  
+  
FFFFFFFFFFFFFFFFFFFFFFFFFFFFFFFFFFFFFFFFFFFFFFFFFFFFFFFFFFFFFFFFFFFFFFFFFFFF  
FFFFFFFFFFFFFFFFFFFFFFFFFFFFFFFFFFFFFFFFFFFFFFFFFFFFFFFFFFFFFFFFFFFF:FFFFFFF  
@A00155:342:HHGFNDSXY:1:2607:11035:29403 1:N:0:GAACCTAG+TCCGCATA  
TGTGGAGGGCAAGAGAGAGCGACTTCTCTCGGGCCCACAGCCTTACAGCTGTGGAGCACGGTATCCTC  
TGCCGAAACAGAGGTTGGACAAGACCGGAGGGGTCTCCTAGTTCCAAAGGAGATGTACT  
+  
FFFFFFFFFFFFFFFFFFFFFFFFFFFFFFFFFFFFFFFFFFFFFFFFFFFFFFFFFFFFFFFFFFFFFFFFFFFF  
FFFFFFFFFFFFFFFFFFFFFFFFFFFFFFFFFFFFFFFFFFFFFFFFFFFFFFFFFFFFFFFFFFFFFFFFFFF  
@A00155:342:HHGFNDSXY:1:2608:9995:6809 1:N:0:GAACCTAG+TCCGCATA  
CTTCTCTCGGGCCCACAGCCTTACAGCTGTGGAGCACGGTATCCTCTGCCGAAACAGAGGTTGGACAA  
GACCGGAGGGGTCTCCTAGTTCCAAAGGAGATGTACTCCGGGCTTGTTACGACCTACCGTGTAAGTC  
+  
FFFFFFFFFFFFFFFFFFFF:FFFFFFFFFFFFFFFFFFFFFFFFFFFFFFFFFFFFFFFFFFFFFFFFFFFFF  
FFFFFFFFFFFFFFFFFFFFFFFFFFFFFFFFFFFF:FFFFFFFFFFFFFFFFFFFFFFFFFFFFFFFFFFFF:FFF  
@A00155:342:HHGFNDSXY:1:2608:18050:22482 1:N:0:GAACCTAG+TCCGCATA  
GAGAGGGATGTGGAGGGCGAGAGAGAGCGACTTCTCTCGGGCCCACAGCCTTACAGCTGTGGAGCACG  
GTATCCTCTGCCGAAACAGAGGTTGGACAAGACCGGAGGGGTCTCCTAGTTCCAAAGGAGATGTACTC  
+  
FFF:FFFF:FFFFFFFFFFFFFFFFFFFFFFFFFFFFFFFFFFFFFFFFFFFFFFFFFFFFFFFFFFFFF  
FFFFFFFFFFFFFFFFFFFFFFFFFFFFFFFFFFFF:FFFFFFFFFFFFFFFFFFFFFFFFFFFFFFFFFFFFF  
@A00155:342:HHGFNDSXY:1:2608:25328:31767 1:N:0:GAACCTAG+TCCGCATA  
AATGCCGAGAGGGATGTGGAGGGCGAGAGAGAGCGACTTCTCTCGGGCCCACAGCCTTACAGCTGTGG  
AGCACGGTATCCTCTGCCGAAACAGAGGTTGGACAAGACCGGAGGGGTCTCCTGGTTCCAAAG  
+  
FFFFFFFFFFFFFFFF:FFFFFFFFFFFFFFFFFFFFFFFFFFFFFFFFFFFFFFFFFFFFFFFFFFFFF  
FFFFFFFFFFFFFFFFFFFFFFFFFFFFFFFFFFFF:FFFFFFFFFFFFFFFFFFFFFFFFFFFFFFFFFFFFF  
@A00155:342:HHGFNDSXY:1:2610:32786:1720 1:N:0:GAACCTAG+TCCGCATA  
TCCACTTAAGGACTCACCTCTGGCCTATGGTCATCTCAATGCCGAGAGGGATGTGGAGGGCGAGAGAG

AGCGACTTCTCTCGGGCCACAGCCTTACAGCTGTGGAGCACGGTATCCTCTGCCGAAACAGAGGTTG  
+  
FFFFFFFFFFFF:FFFFFFFFFFFFFFFFFFFFFFFFFFFFFFFFFFFFFFFFFFFFFFFFFFFFFFFFFFFFFFFF  
FFFFFFFFFFFFFFFFFFFFFFFFFFFFFFFFFFFFFFFFFFFFFFFFFFFFFFFFFFFFFFFFFFFFFFFFFFFF,FFF:FFFFFFFFFFFF  
@A00155:342:HHGFNDSXY:1:2610:22019:3333 1:N:0:GAACCTAG+TCCGCATA  
TTCTCTCGGGCCACAGCCTTACAGCTGTGGAGCACGGTATCCTCTGCCGAAACAGAGGTTGGACAAG  
ACCGGAGGGGTCTCCTAGTTCCAAAGGAGATGTACTCCGGGCTTGTTACGACCTACCGTGTAAGTCG  
+  
FFFFFFFFFFFFFFFFFFFFFFFFFFFFFFFFFFFFFFFFFFFFFFFFFFFFFFFFFFFFFFFFFFFFFFFFFFFF:FFFFFFFFFFFF  
FFFFFFFFFFFFFFFFFFFFFFFFFFFFFFFFFFFFFFFFFFFFFFFFFFFFFFFFFFFFFFFFFFFFFFFFFFFF:F:FFFFFFFFFFFFFFFFFFFF  
@A00155:342:HHGFNDSXY:1:2610:22770:11710 1:N:0:GAACCTAG+TCCGCATA  
TTCTCTCGGGCCACAGCCTTACAGCTGTGGAGCACGGTATCCTCTGCCGAAACAGAGGTTGGACAAG  
ACCGGAGGGGTCTCCTAGTTCCAAAGGAGATGTACTCCGGGCTTGTTACGACCTACCGTGTAAGTCG  
+  
:FFFFFFFFFFFFFFFFFFFFFFFFFFFFFFFFFFFFFFFFFFFFFFFFFFFFFFFFFFFFFFFFFFFFFFFFFFFF  
FFFFFFFFFFFFFFFFFFFFFFFFFFFFFFFFFFFFFFFFFFFFFFFFFFFFFFFFFFFFFFFFFFFFFFFFFFFF:FFFF:FFFFFFFFFFFF  
@A00155:342:HHGFNDSXY:1:2611:7817:19445 1:N:0:GAACCTAG+TCCGCATA  
GAGCGACTTCTCTCGGGCCACAGCCTTACAGCTGTGGAGCACGGTATCCTCTGCCGAAACAGAGGTT  
GGACAAGACCGGAGGGGTCTCCTAGTTCCAAAGGAGATGTACTCCGGGCTTGTTACGACCTACCGTG  
+  
FFFFFFFFFFFFFFFFFFFFFFFFFFFFFFFFFFFF:F:FFFFFFFFFFFFFFFFFFFFFFFFFFFFFFFFFFFFFFFFFFFF  
FFFFFFFFFFFFFFFFFFFFFFFFFFFFFFFFFFFFFFFFFFFFFFFFFFFFFFFFFFFFFFFFFFFFFFFFFFFF,FFF:F  
@A00155:342:HHGFNDSXY:1:2613:31792:8390 1:N:0:GAACCTAG+TCCGCATA  
ATCTCAATGCCGAGAGGGATGTAGAGGGCGAGAGAGAGCGACTTCTCTCGGGCCACAGCCTTACAGC  
TGTGGAGCACGGTATCCTCTGCCGAAACAGAGGTTGGACAAGACCGGAGGGGTCTCCTAGTTCCAAAG  
+  
FFFFFFFFFFFFFFFFFFFFFFFFFFFFFFFFFFFF:FFFFFFFFFFFFFFFFFFFFFFFFFFFFFFFFFFFF:FFFFFFFFFFFFFFFFFFFFF:,FFFF  
FFFFFFFFFFFFF:FFFFFFFFFFFFFFFFFFFFFFFFFFFFFFFFFFFFFFFFFFFFFFFFFFFFFFFFFFFFFFFFFFFF,FFF:F  
@A00155:342:HHGFNDSXY:1:2613:15754:13683 1:N:0:GAACCTAG+TCCGCATA  
ACCTCTGTTTCGGCAGAGGATACCGTGCTCCACAGCTGTAAGGCTGTGGGCCCCGAGAGAAGTCGCTCT  
CTCTCGCCCTTACATCCCTCTCGGCATTGAGATGACCATAGGCCAGAGGTGAGTCCTTAAGTGGACA  
+  
FFFFF:FFFFFFFFFFFF:FFFFFFFFFFFFFFFFFFFFFFFFFFFFFFFFFFFFFFFFFFFFFFFFFFFFFFFFFFFF  
F:FFFFFFFFFFFFFFFFFFFFFFFFFFFFFFFFFFFFFFFFFFFFFFFFFFFFFFFFFFFFFFFFFFFF:FFFFFFFFF:FFFFFFFFFFFF  
@A00155:342:HHGFNDSXY:1:2613:16432:27633 1:N:0:GAACCTAG+TCCGCATA  
CCCACAGCCTTACAGCTGTGGAGCACGGTATCCTCTGCCGAAACAGAGGTTGGACAAGACCGGAGGGG  
TCTCCTAGTTCCAAAGGAGATGTACTCCGGGCTTGTTACGACCTACCGTGTAAGTCGTAGTCTAGTA  
+  
FFFFFFFFFFFF:FFFFFF:FFFFFFFFFFFFFFFFFFFFFFFFFFFFFFFFFFFFFFFFFFFFFFFFFFFFFFFFFFFF  
FFFFFFFFFFFFFFFFFFFFFFFFFFFFFFFFFFFFFFFFFFFF:FFFFFFFFFFFFFFFFFFFFFFFFFFFFFFFFFFFF  
@A00155:342:HHGFNDSXY:1:2613:13322:27853 1:N:0:GAACCTAG+TCCGCATA  
GAGCGACTTCTCTCGGGCCACAGCCTTACAGCTGTGGAGCACGGTATCCTCTGCCGAAACAGAGGTT  
GGACAAGACCGGAGGGGTCTCCTAGTTCCAAAGGAGATGTACTCCGGGCTTGTTACGACCTACCGTG  
+  
FFFFFFFFFFFFFFFFFFFFFFFFFFFFFFFFFFFFFFFFFFFFFFFFFFFFFFFFFFFFFFFFFFFFFFFFFFFF  
FFFFFFFFFFFFFFFFFFFFFFFFFFFFFFFFFFFFFFFFFFFF:FFFFFFFFFFFFFFFFFFFFFFFFFFFFFFFFFFFF  
@A00155:342:HHGFNDSXY:1:2613:13458:28056 1:N:0:GAACCTAG+TCCGCATA  
GAGCGACTTCTCTCGGGCCACAGCCTTACAGCTGTGGAGCACGGTATCCTCTGCCGAAACAGAGGTT  
GGACAAGACCGGAGGGGTCTCCTAGTTCCAAAGGAGATGTACTCCGGGCTTGTTACGACCTACCGTG  
+  
FFFFFFFFFFFFFFFFFFFFFFFFFFFFFFFFFFFFFFFFFFFFFFFFFFFFFFFFFFFFFFFFFFFFFFFFFFFF  
FFFFFFFFFFFFFFFFFFFFFFFFFFFFFFFFFFFF:FFFFFFFFFFFFFFFFFFFFFFFFFFFFFFFFFFFF:FFFFFFFFFFFFFFFFFFFF  
@A00155:342:HHGFNDSXY:1:2614:6497:9486 1:N:0:GAACCTAG+TCCGCATA  
ATCTCAATGCCGAGAGGGATGTGGAGGGCGAGAGAGAGCGACTTCTCTCGGGCCACAGCCTTACAGC

TGTGGAGCACGGTATCCTCTGCCGAAACAGAGGTTGGACAAGACCGGAGGGGTCTCCTAGTTCCAAAG  
 +  
 FFFFFFFFFFFFFFFFFFFFFFFFFFFFFFFFFFFFFFFFFFFFFFFFFFFFFFFFFFFFFFFFFFFFFFFFFF:FFFFFFFFFFFFFFFFFFFFFFFFF::FFFF  
 FFFFFFFFFFFFFFFFFFFFFFFFFFFFFFFFFFFFFFFFFFFFFFFFFFFFFFFFFFFFFFFFFFFFFFFFFF,FFFFFFFFFFFFFFFFFFFFFFFFFFFFFFFFF:F  
 @A00155:342:HHGFNDSXY:1:2614:8404:21778 1:N:0:GAACCTAG+TCCGCATA  
 TGCTCCACAGCTGTAAGGCTGTGGGCCCCGAGAGAAGTCGCTCTCTCTCGCCCTCCACATCCCTCTCGG  
 CATTGAGATGACCATAGGCCAGAGGTGAGTCCTTAAGTGGACACAGCTGATCTAAGGCGGTGTGGCGG  
 +  
 FFFFFFFFFFFFFFFFFFFFFFFFFFFFFFFFFFFFFFFFFFFFFFFFFFFFFFFFFFFFFFFFFFFFFFFFFF  
 FFFFFFFFFFFFFFFFFFFFFFFFFFFFFFFFFFFFFFFFFFFFFFFFFFFFFFFFFFFFFFFFFFFFFFFFFF  
 @A00155:342:HHGFNDSXY:1:2614:19813:22091 1:N:0:GAACCTAG+TCCGCATA  
 ACTTCTCTCGGGCCACAGCCTTACAGCTGTGGAGCACGGTATCCTCTGCCGAAACAGAGGTTGGACA  
 AGACCGGAGGGGTCTCCTAGTTCCAAAGGAGATGTACTCCGGGCTTGTTACGACCTACCGTGTAAGT  
 +  
 FFFFFFFFFFFFFFFFFFFFFFFFFFFFFFFFFFFFFFFFFFFFFFFFFFFFFFFFFFFFFFFFFFFFFFFFFF  
 FFFFFFFFFFFFFFFFFFFFFFFFFFFFFFFFFFFFFFFFFFFFFFFFFFFFFFFFFFFFFFFFFFFFFFFFFF:  
 @A00155:342:HHGFNDSXY:1:2614:4273:25363 1:N:0:GAACCTAG+TCCGCATA  
 GTATCCTCTGCCGAAACAGAGGTTGGACAAGACCGGAGGGGTCTCCTAGTTCCAAAGGAGATGTACTC  
 CGGGCTTGTTACGACCTACCGTGTAAGTCGTAGTCTAGTAGGCTACCTGACGAGTCCTTTTTAGGAC  
 +  
 FFFFFFFFFFFFFFFFFF:FFFFFFFFFFFFFFFFFFFFFFFFFFFFFFFFFFFFFFFFFFFFFFFFFFFFF  
 FFFFFFFFFFFFFFFFFFFFFFFFFFFFFFFFFFFFFFFFFFFFFFFFFFFFFFFFFFFFFFFFFFFFFFFFFF:FFF:FF  
 @A00155:342:HHGFNDSXY:1:2614:4508:25739 1:N:0:GAACCTAG+TCCGCATA  
 GTATCCTCTGCCGAAACAGAGGTTGGACAAGACCGGAGGGGTCTCCTAGTTCCAAAGGAGATGTACTC  
 CGGGCTTGTTACGACCTACCGTGTAAGTCGTAGTCTAGTAGGCTACCTGACGAGTCCTTTTTAGGAC  
 +  
 FFFFFFFFFFFFFFFFFFFFFFFFFFFFFFFFFFFFFFFFFFFFFFFFFFFFFFFFFFFFFFFFFFFFFFFFFF  
 FFFF:FFFFFFFFFFFFFFFFF:FFFFFFFFF:FFFFFFFFFFFFFFFFFFFFFFFFFFFFFFFFF:FFFFFFFFF  
 @A00155:342:HHGFNDSXY:1:2614:1551:29356 1:N:0:GAACCTAG+TCCGCATA  
 CTTCTCTCGGGCCACAGCCTTACAGCTGTGGAGCACGGTATCCTCTGCCGAAACAGAGGTTGGACAA  
 GACCGGAGGGGTACCTAGTTCCAAAGGAGATGTACTCCGGGCTTGTTACGACCTACCGTGTAAGTC  
 +  
 FFFFFFFFFFFFFFFFFFFFFFFFFFFFFFFFFFFFFFFFFFFFFFFFFFFFFFFFFFFFFFFFFFFFFFFFFF  
 FFFFFFFFFFFFFFFFFFFFFFFFFFFFFFFFFFFFFFFFFFFFFFFFFFFFFFFFFFFFFFFFFFFFFFFFFF:FFFFF  
 @A00155:342:HHGFNDSXY:1:2614:17327:30843 1:N:0:GAACCTAG+TCCGCATA  
 ATGCCGAGAGGGATGTAGAGGGCGAGAGAGAGCGACTTCTCTCGGGCCACAGCCTTACAGCTGTGGA  
 GCACGGTATCCTCTGCCGAAACAGAGGTTGGACAAGACCGGAGGGGTCTCCTAGTTCCAAAGGAGATG  
 +  
 FFFFFFFFFFFFFFFFFFFFFFFFFFFFFFFFFFFFFFFFFFFFFFFFFFFFFFFFFFFFFFFFFFFFFFFFFF  
 FFFFFFFFFFFFFFFFFFFFFFFFFFFFFFFFFFFFFFFFFFFFFFFFFFFFFFFFFFFFFFFFFFFFFFFFFF  
 @A00155:342:HHGFNDSXY:1:2615:28293:6590 1:N:0:GAACCTAG+TCCGCATA  
 CTTCTCTCGGGCCACAGCCTTACAGCTGTGGAGCACGGTATCCTCTGCCGAAACAGAGGTTGGACAA  
 GACCGGAGGGGTCTCCTAGTTCCAAAGGAGATGTACTCCGGGCTTGTTACGACCTACCGTGTAAGTC  
 +  
 FFFFFFFFFFFFFFFFFFFFFFFFFFFFFFFFFFFFFFFFFFFFFFFFFFFFFFFFFFFFFFFFFFFFFFFFFF  
 FFFFFFFFFFFFFFFFFFFFFFFFFFFFFFFFFFFFFFFFFFFFFFFFFFFFFFFFFFFFFFFFFFFFFFFFFF  
 @A00155:342:HHGFNDSXY:1:2615:9552:9893 1:N:0:GAACCTAG+TCCGCATA  
 GGATGTGGAGGGCGAGAGAGAGCGACTTCTCTCGGGCCACAGCCTTACAGCTGTGGAGCACGGTATC  
 CTCTGCCGAAACAGAGGTTGGACAAGACCGGAGGGGTCTCCTGGTTCCAAAGGAGATGTACTCCGGGC  
 +  
 FFFFFFFFFFFFFFFFFFFFFFFFFFFFFFFFFFFFFFFFFFFFFFFFFFFFFFFFFFFFFFFFFFFFFFFFFF  
 FFFFFFFFFFFFFFFFFFFFFFFFFFFFFFFFFFFFFFFFFFFFFFFFFFFFFFFFFFFFFFFFFFFFFFFFFF:FFFFFFFFFFFFFFFFF  
 @A00155:342:HHGFNDSXY:1:2615:4444:22122 1:N:0:GAACCTAG+TCCGCATA  
 GGGCGAGAGAGAGCGACTTCTCTCGGGCCACAGCCTTACAGCTGTGGAGCACGGTATCCTCTGCCGA

AACAGAGGTTGGACAAGACCGGAGGGGTCTCCTAGTTCCAAAGGAGATGTACTCCGGGCTTGTTACAG  
+  
FFFFFFFFFFFFFFFFFFFFFFFFFFFFFFFFFFFFFFFFFFFFFFFFFFFFFFFFFFFFFFFFFFFFFFFF  
FFFFFFFFFFFFFFFFFFFFFFFFFFFFFFFFFFFFFFFFFFFFFFFFFFFFFFFFFFFFFFFFFFFFFFFF  
@A00155:342:HHGFNDSXY:1:2615:29270:24314 1:N:0:GAACCTAG+TCCGCATA  
AGAGAGAGCGACTTCTCTCGGGCCCACAGCCTTACAGCTGTGGAGCACGGTATCCTCTGCCGAAACAG  
AGGTTGGACAAGACCGGAGGGGTCTCCTAGTTCCAAAGGAGATGTACTCCGGGCTTGTTACGACCTA  
+  
FFFFFFFFFFFFFFFFFFFFFFFFFFFFFFFFFFFFFFFFFFFFFFFFFFFFFFFFFFFFFFFFFFFFFFFF  
FF:FFFFFFFFFFFFFFFFFFFFFFFFFFFFFFFFFFFFFFFFFFFFFFFFFFFFFFFFFFFFFFFFFFFF  
@A00155:342:HHGFNDSXY:1:2615:15926:25817 1:N:0:GAACCTAG+TCCGCATA  
CTTCTCTCGGGCCCACAGCCTTACAGCTGTGGAGCACGGTATCCTCTGCCGAAACAGAGGTTGGACAA  
GACCGGAGGGGTCTCCTAGTTCCAAAGGAGATGTACTCCGGGCTTGTTACGACCTACCGTGTAAGTC  
+  
FFFFFFFFFFFFFFFFFFFFFFFFFFFFFFFFFFFFFFFFFFFFFFFFFFFFFFFFFFFFFFFFFFFFFFFF  
FFFFFFFFFFFFFFFFFFFFFFFFFFFFFFFFFFFFFFFFFFFFFFFFFFFFFFFFFFFFFFFFFFFFFFFF  
@A00155:342:HHGFNDSXY:1:2615:10013:26412 1:N:0:GAACCTAG+TCCGCATA  
CTTCTCTCGGGCCCACAGCCTTACAGCTGTGGAGCACGGTATCCTCTGCCGAAACAGAGGTTGGACAA  
GACCGGAGGGGTCTCCTAGTTCCAAAGGAGATGTACTCCGGGCTTGTTACGACCTACCGTGTAAGTC  
+  
FFFFFFFFFFFFFFFFFFFFFFFFFFFFFFFFFFFFFFFFFFFFFFFFFFFFFFFFFFFFFFFFFFFFFFFF  
FFFFFFFFFFFFFFFFFFFFFFFFFFFFFFFFFFFFFFFFFFFFFFFFFFFFFFFFFFFFFFFFFFFFFFFF  
@A00155:342:HHGFNDSXY:1:2615:10212:26475 1:N:0:GAACCTAG+TCCGCATA  
CTTCTCTCGGGCCCACAGCCTTACAGCTGTGGAGCACGGTATCCTCTGCCGAAACAGAGGTTGGACAA  
GACCGGAGGGGTCTCCTAGTTCCAAAGGAGATGTACTCCGGGCTTGTTACGACCTACCGTGTAAGTC  
+  
FFFFFFFFFFFFFFFFFFFFFFFFFFFFFFFFFFFFFFFFFFFFFFFFFFFFFFFFFFFFFFFFFFFFFFFF  
FFFFFFFFFFFFFFFFFFFFFFFFFFFFFFFFFFFFFFFFFFFFFFFFFFFFFFFFFFFFFFFFFFFFFFFF  
@A00155:342:HHGFNDSXY:1:2615:8703:31876 1:N:0:GAACCTAG+TCCGCATA  
CAGCCTTACAGCTGTGGAGCACGGTATCCTCTGCCGAAACAGAGGTTGGACAAGACCGGAGGGGTCTC  
CTAGTTCCAAAGGAGATGTACTCCGGGCTTGTTACGACCTACCGTGTAAGTCGTAGTCTAGTAGGCT  
+  
FFFFFFFFFFFFFFFFFFFFFFFFFFFFFFFFFFFFFFFFFFFFFFFFFFFFFFFFFFFFFFFFFFFFFFFF  
FFFFFFFFFFFFFFFFFFFFFFFFFFFFFFFFFFFFFFFFFFFFFFFFFFFFFFFFFFFFFFFFFFFFFFFF  
@A00155:342:HHGFNDSXY:1:2615:7798:32941 1:N:0:GAACCTAG+TCCGCATA  
GGACTCTCCTCTGGCCTATGGTCATCTCAATGCCGAGAGGGATGTGGAGGGCGAGAGAGAGCGACTTC  
TCTCGGGCCCACAGCCTTACAGCTGTGGAGCACGGTATCCTCTGCCGAAACAGAGGTTGGACAAGACC  
+  
FFFFFFFFFFFFFF:FFFFFFFFFFFFFFFFFFFFFFFFFFFFFFFFFFFFFFFFFFFFFFFFFFFFFFFF  
FFFF:FFFFFFFFFFFFFF:FFFFFFFFFFFFFFFFFFFFFFFFFFFFFFFFFFFFFFFFFFFFFFFF  
@A00155:342:HHGFNDSXY:1:2616:6605:7827 1:N:0:GAACCTAG+TCCGCATA  
CTTCTCTCGGGCCCACAGCCTTACAGCTGTGGAGCACGGTATCCTCTGCCGAAACAGAGGTTGGACAA  
GACCGGAGGGGTCTCCTAGTTCCAAAGGAGATGTACTCCGGGCTTGTTACGACCTACCGTGTAAGTC  
+  
F:FFFFFFFFFFFFFFFFFFFFFFFFFFFFFFFFFFFFFFFFFFFFFFFFFFFFFFFFFFFFFFFFFFFF  
FFFFFFFFFFFFFFFFFFFFFFFFFFFFFFFFFFFFFFFFFFFFFFFFFFFFFFFFFFFFFFFFFFFFFFFF  
@A00155:342:HHGFNDSXY:1:2616:17264:13980 1:N:0:GAACCTAG+TCCGCATA  
CTCAATGCCGAGAGGGATGTGGAGGGCGAGAGAGAGCGACTTCTCTCGGGCCCACAGCCTTACAGCTG  
TGGAGCACGGTATCCTCTGCCGAAACAGAGGTTGGACAAGACCGGAGGGGTCTCCTAGTTCCAAAGGA  
+  
FFFFFFFFFFFFFFFFFFFFFFFFFFFFFFFFFFFFFFFFFFFFFFFFFFFFFFFFFFFFFFFFFFFFFFFF  
FFFFFFFFFFFFFFFFFFFFFFFFFFFFFFFFFFFFFFFFFFFFFFFFFFFFFFFFFFFFFFFFFFFFFFFF  
@A00155:342:HHGFNDSXY:1:2616:4453:16094 1:N:0:GAACCTAG+TCCGCATA  
TCTCAATGCCGAGAGGGATGTGGAGGGCGAGAGAGAGCGACTTCTCTCGGGCCCACAGCCTTACAGCT

GTGGAGCACGGTATCCTCTGCCGAAACAGAGGTTGGACAAGACCGGAGGGGTCTCCTGGTTCCAAAGG  
+  
FFFFFFFFFFFFFFFFFFFFFFFFFFFFFFFFFFFFFFFFFFFFFFFFFFFFFFFFFFFFFFFFFFFFFFFF  
FFFFFFFFFFFFFFFFFFFFFFFFFFFFFFFFFFFFFFFFFFFFFFFFFFFFFFFFFFFFFFFFFFFFFFFF  
@A00155:342:HHGFNDSXY:1:2616:16523:20369 1:N:0:GAACCTAG+TCCGCATA  
CTCAATGCCGAGAGGGATGTGGAGGGCGAGAGAGAGCGACTTCTCTCGGGCCCACAGCCTTACAGCTG  
TGGAGCACGGTATCCTCTGCCGAAACAGAGGTTGGACAAGACCGGAGGGGTCTCCTAGTTCCAAAGGA  
+  
FFFFFF:FFFFFFFF,F:FFFFFFFFFFFFFFFFFFFFFFFFFFFFFFFFFFFFFFFFFFFFFFFFFFFFF:FFF  
FFFFFFFFFFFFFFFFFFFFFFFFFFFFFFFFFFFFFFFFFFFFFFFFFFFFFFFFFFFFFFFFFFFFFFFF:  
@A00155:342:HHGFNDSXY:1:2616:30228:29356 1:N:0:GAACCTAG+TCCGCATA  
GAGAGCGACTTCTCTCGGGCCCACAGCCTTACAGCTGTGGAGCACGGTATCCTCTGCCGAAACAGAGG  
TTGGACAAGACCGGAGGGGTCTCCTAGTTCCAAAGGAGATGTACTCCGGGCTTGTTACGACCTACC  
+  
FFFFFFFFF:FFFFFFFFFFFFFFFFFFFFFFFFFFFFFFFFFFFFFFFFFFFFFFFFFFFFFFFFFFFFF:FFFFF  
FFFFFFFFFFFFFFFFFFFFFFFFFFFFFFFFFFFFFFFFFFFFFFFFFFFFFFFFFFFFFFFFFFFFFFFFF  
@A00155:342:HHGFNDSXY:1:2616:14344:36479 1:N:0:GAACCTAG+TCCGCATA  
GGGCGAGAGAGAGCGACTTCTCTCGGGCCCACAGCCTTACAGCTGTGGAGCACGGTATCCTCTGCCGA  
AACAGAGGTTGGACAAGACCGGAGGGGTCTCCTAGTTCCAAAGGAGATGTACTCCGGGCTTGTTTACG  
+  
FFFFFFFFFFFFFFFFFFFFFFFFFFFFFFFFFFFFFFFFFFFFFFFFFFFFFFFFFFFFFFFFFFFFFFFFF  
FFFFFFFFFFFFFFFFFFFFFFFFFFFFFFFFFFFFFFFFFFFFFFFFFFFFFFFFFFFFFFFFFFFFFFFFF:FFFFF  
@A00155:342:HHGFNDSXY:1:2617:2962:4586 1:N:0:GAACCTAG+TCCGCATA  
AGTACATCTCCTTTGGAAGTACTAGGAGACCCCTCCGGTCTTGTCCAACCTCTGTTTCGGCAGAGGATACC  
GTGCTCCACAGCTGTAAGGCTGTGGGCCCCGAGAGAAGTCGCTCTCTCTCGCCCTCCACATCCCTCTCG  
+  
FFFFFFFFFFFFFFFFFFFFFFFFFFFFFFFFFFFFFFFFFFFFFFFFFFFFFFFFFFFFFFFFFFFFFFFFF:FF,FFFFFFFFFFFFFFFFFFFFFFFFFFFFFFFF  
FFFFFFFFFFFFF:FFF:FFFFFFFFF,FFFFFFFFFFFFFFFFFFFFFFFFFFFFFFFFFFFFFFFFFFFFF:FFFFF:FFFFF:FF  
@A00155:342:HHGFNDSXY:1:2617:28465:21699 1:N:0:GAACCTAG+TCCGCATA  
GTCCACTTAAGGACTCACCTCTGGCCTATGGTCATCTCAATGCCGAGAGGGATGTGGAGGGCGAGAGA  
GAGCGACTTCTCTCGGGCCCACAGCCTTACAGCTGTGGAGCACGGTATCCTCTGCCGAAACAGAGGTT  
+  
FFFFFFFFFFFFFFFFFFFFFFFFFFFFFFFFFFFFFFFFFFFFFFFFFFFFFFFFFFFFFFFFFFFFFFFFF:FFFFF  
FFFFFFFFFFFFF:FFFFFFFFFFFFFFFFFFFFFFFFFFFFFFFFFFFFFFFFFFFFFFFFFFFFFFFFFFFFF:FFFFFFFFFFFFF  
@A00155:342:HHGFNDSXY:1:2617:5828:33849 1:N:0:GAACCTAG+TCCGCATA  
GTATCCTCTGCCGAAACAGAGGTTGGACAAGACCGGAGGGGTCTCCTAGTTCCAAAGGAGATGTACTC  
CGGGCTTGTTACGACCTACCGTGTAAAGTCGTAGTCTAGTAGGCTACCTGACGAGTCCTTTTACGAC  
+  
FF:FFFFFFFFFFFFFFFFFFFFFFFFFFFFFFFFFFFFFFFFFFFFFFFFFFFFFFFFFFFFFFFFFFFFF:FFFFF  
FFFFFFFFFFFFFFFFF:FFFFFFFFFFFFFFFFFFFFFFFFFFFFFFFFFFFFFFFFFFFFFFFFFFFFF:FFFFFFFFFFFFF:FFFFF:FF  
@A00155:342:HHGFNDSXY:1:2618:5113:26036 1:N:0:GAACCTAG+TCCGCATA  
CTTCTCTCGGGCCCACAGCCTTACAGCTGTGGAGCACGGTATCCTCTGCCGAAACAGAGGTTGGACAA  
GACCGGAGGGGTCTCCTGGTTCCAAAGGAGATGTACTCCGGGCTTGTTACGACCTACCGTGTAAAGTC  
+  
FFFFFFFFFFFFFFFFFFFFFFFFFFFFFFFFFFFFFFFFFFFFFFFFFFFFFFFFFFFFFFFFFFFFFFFFF  
F:FFFFFFFFFFFFFFFFFFFFFFFFFFFFFFFFFFFFFFFFFFFFFFFFFFFFFFFFFFFFFFFFFFFFF  
@A00155:342:HHGFNDSXY:1:2618:3965:27492 1:N:0:GAACCTAG+TCCGCATA  
TCTCTCGGGCCCACAGCCTTACAGCTGTGGAGCACGGTATCCTCTGCCGAAACAGAGGTTGGACAAGA  
CCGGAGGGGTCTCCTAGTTCCAAAGGAGATGTACTCCGGGCTTGTTACGACCTACCGTGTAAAGTCG  
+  
FFFFFFFFFFFFFFFFFFFFFFFFFFFFFFFFFFFFFFFFFFFFFFFFFFFFFFFFFFFFFFFFFFFFFFFFF  
FFFFFFFFFFFFFFFFFFFFFFFFFFFFFFFFFFFFFFFFFFFFFFFFFFFFFFFFFFFFFFFFFFFFFFFFF  
@A00155:342:HHGFNDSXY:1:2619:18123:10739 1:N:0:GAACCTAG+TCCGCATA  
ATCCTCTGCCGAAACAGAGGTTGGACAAGACCGGAGGGGTCTCCTTGTTCCAAAGGAGATGTACTCCG



GGCTTGTTACGACCTACCGTGTAAGTCGTAGTCTAGTAGGCTACCTGACGAGTCCTTTTTAGGACG  
+  
FFFFF:FFFFFFFF:FF:F:FFFFF:FFFFFFFFFFFF:FFFFFFFFFFFF:FFFFF,FFFFFFFF:FFFFF  
FFF:FFFFFFFFFFFFFFFFFFFF:F:,FFFFFFFF,FFFFFFFF,FFFFF:FFFFFFFFF:,FFF:FFFF  
@A00155:342:HHGFNDSXY:1:2619:22761:18865 1:N:0:GAACCTAG+TCCGCATA  
ATGCCGAGAGGGATGTGGAGGGCGAGAGAGAGCGACTTCTCTCGGGCCCACAGCCTTACAGCTGTGGA  
GCACGGTATCCTCTGCCGAAACAGAGGTTGGACAAGACCGGAGGGGTCTCCTAGTTCCAAAGGAGATG  
+  
FFFFFFFFFFFFFFFFFFFFFFFFFFFFFFFFFFFFFFFFFFFFFFFFFFFFFFFFFFFFFFFFFFFFFFFF  
FFFFFFFFFFFFFFFFFFFFFFFF:FFFFFFFFFFFFFFFFFFFFFFFFFFFFFFFFFFFFFFFFFFFFFFFF  
@A00155:342:HHGFNDSXY:1:2619:27362:29997 1:N:0:GAACCTAG+TCCGCATA  
AGAGAGAGCGACTTCTCTCGGGCCCACAGCCTTACAGCTGTGGAGCACGGTATCCTCTGCCGAAACAG  
AGGTTGGACAAGACCGGAGGGGTCTCCTGGTTCCAAAGGAGATGTACTCCGGGCTTGTTACG  
+  
FFFFFFFFF:FFFFFFFFFFFFFFFFFFFFFFFFFFFFFFFFFFFFFFFFFFFFFFFFFFFFFFFFFFFFF:FFFFF:F  
FF,FFFFFFFFF:,FFFFFFFFFFFFFFFFFFFFFFFFFFFFFFFFFFFFFFFFFFFFFFFFFFFFFFFFFFFFF:FFFFFFFFF  
@A00155:342:HHGFNDSXY:1:2619:10782:30780 1:N:0:GAACCTAG+TCCGCATA  
CTTCTCTCGGGCCCACAGCCTTACAGCTGTGGAGCACGGTATCCTCTGCCGAAACAGAGGTTGGACAA  
GACCGGAGGGGTCTCCTGGTTCCAAAGGAGATGTACTCCGGGCTTGTTACGACCTACCGTGTAAGTC  
+  
FFFFFFFFFFFFFFFFFFFFFFFFFFFFFFFFFFFFFFFFFFFFFFFFFFFFFFFFFFFFFFFFFFFFFFFF:FFFFF  
FFFFFFFFFFFFFFFFFFFFFFFFFFFFFFFFFFFFFFFFFFFFFFFFFFFFFFFFFFFFFFFFFFFFFFFF,FF:FFFF  
@A00155:342:HHGFNDSXY:1:2619:10520:33051 1:N:0:GAACCTAG+TCCGCATA  
CTTCTCTCGGGCCCACAGCCTTACAGCTGTGGAGCACGGTATCCTCTGCCGAAACAGAGGTTGGACAA  
GACCGGAGGGGTCTCCTGGTTCCAAAGGAGATGTACTCCGGGCTTGTTACGACCTACCGTGTAAGTC  
+  
FFFFFFFFFFFFFFFFFFFFFFFFFFFFFFFFFFFFFFFFFFFFFFFFFFFFFFFFFFFFFFFFFFFFFFFF  
FFFFFFFFFFFFFFFFFFFFFFFFFFFFFFFFFFFFFFFFFFFFFFFFFFFFFFFFFFFFFFFFFFFFFFFF  
@A00155:342:HHGFNDSXY:1:2619:29053:34366 1:N:0:GAACCTAG+TCCGCATA  
CTCAATGCCGAGAGGGATGTGGAGGGCGAGAGAGAGCGACTTCTCTCGGGCCCACAGCCTTACAGCTG  
TGGAGCACGGTATCCTCTGCCGAAACAGAGGTTGGACAAGACCGGAGGGGTCTCCTAGTTCCAAAGGA  
+  
FFFFFFFFFFFFFFFFFFFFFFFFFFFFFFFFFFFFFFFFFFFFFFFFFFFFFFFFFFFFFFFFFFFFFFFF  
FFFFFFFFFFFFFFFFFFFFFFFFFFFFFFFFFFFFFFFFFFFFFFFFFFFFFFFFFFFFFFFFFFFFFFFF:F:FFFFFFFFFFFFFFFFFFFFFFFF  
@A00155:342:HHGFNDSXY:1:2621:32452:12320 1:N:0:GAACCTAG+TCCGCATA  
AGATCAGCTGTGTCCACTTAAGGACTCACCTCTGGCCTATGGTCATCTCAATGCCGAGAGGGATGTGA  
AGGGCGAGAGAGAGCGACTTCTCTCGGGCCCACAGCCTTACAGCTGTGGAGCACGGTATCCTCTGCCG  
+  
FFF:F:FFFFFFFFFFFF:FFFFFFFFFFFF:FFFFF,,FFFFF,FFFFFFFFFFFFFFFFFFFF,,FFFF  
:FFFFF:FFFFFFFFFF,FF:FFF:FFFFFFFFF:FFF:FFFFFFFFFFFFFFFFFFFFF,:FF:FFFFF  
@A00155:342:HHGFNDSXY:1:2621:10131:28870 1:N:0:GAACCTAG+TCCGCATA  
ATCTCAATGCCGAGAGGGATGTGGAGGGCGAGAGAGAGCGACTTCTCTCGGGCCCACAGCCTTACAGC  
TGTGGAGCACGGTATCCTCTGCCGAAACAGAGGTTGGACAAGACCGGAGGGGTCTCCTAGTTCCAAAG  
+  
FFFFFFFFFFFFFFFFFFFFFFFFFFFFFFFFFFFFFFFFFFFFFFFFFFFFFFFFFFFFFFFFFFFFFFFF  
FFFFFFFFFFFFFFFFFFFFFFFFFFFFFFFFFFFFFFFFFFFFFFFFFFFFFFFFFFFFFFFFFFFFFFFF  
@A00155:342:HHGFNDSXY:1:2621:26259:36229 1:N:0:GAACCTAG+TCCGCATA  
GGGATGTGGAGGGCGAGAGAGAGCGACTTCTCTCGGGCCCACAGCCTTACAGCTGTGGAGCACGGTAT  
CCTCTGCCGAAACAGAGGTTGGACAAGACCGGAGGGGTCTCCTAGTTCCAAAGGAGATGTACTCCGGG  
+  
FFFFFFFFF:FFFFFFFFFFFFFFFFFFFFFFFFFFFFFFFFFFFFFFFFFFFFFFFFFFFFFFFFFFFFF  
FFFFFFFFFFFFFFFFFFFFFFFFFFFFFFFFFFFFFFFFFFFFFFFFFFFFFFFFFFFFFFFFFFFFFFFF  
@A00155:342:HHGFNDSXY:1:2622:7735:1266 1:N:0:GAACCTAG+TCCGCATA  
TGCCGAGAGGGATGTGGAGGGCGAGAGAGAGCGACTTCTCTCGGGCCCACAGCCTTACAGATGTGGAG

CACGGTATCCTCTGCCGAAACAGAGGTTGGACAAGACCGGAGGGGTCTCCTAGTTCCAAAGGAGATGT  
+  
FFFFFFFFFFFFFFFFFFFFFFFFFFFFFFFFFFFFFFFFFFFFFFFFFFFFFFFFFFFFFFFFFFFFFFFFFFFF  
FFFFFFFFFFFFFFFFFFFFFFFFFFFFFFFFFFFFFFFFFFFFFFFFFFFFFFFFFFFFFFFFFFFFFFFFFFFF:FFFFFF,FF  
@A00155:342:HHGFNDSXY:1:2622:29839:6355 1:N:0:GAACCTAG+TCCGCATA  
TTACAGCTGTGGAGCACGGTATCCTCTGCCGAAACAGAGGTTGGACAAGACCGGAGGGGTCTCCTAGT  
TCCAAAGGAGATGTACTCCGGGCTAGTTCACGACCTACCGTGTAAGTCGTAGTCTAGTAGGCTACCTG  
+  
FFFFFFFFFFFFFFFFFFFFFFFFFFFFFFFFFFFFFFFFFFFFFFFFFFFFFFFFFFFFFFFFFFFFFFFFFFFF:FF  
FFFFFFFFFFFFFFFFFFFFFFFFFFFFFFFFFFFFFFFFFFFFFFFFFFFFFFFFFFFFFFFFFFFFFFFFFFFF,FFFFFFFFFFFFFFFF:FFF:FFF:  
@A00155:342:HHGFNDSXY:1:2622:9091:6872 1:N:0:GAACCTAG+TCCGCATA  
GCGAGAGAGAGCGACTTCTCTCGGGCCACAGCCTTACAGCTGTGGAGCACGGTATCCTCTGCCGAAA  
CAGAGGTTGGACAAGACCGGAGGGGTCTCCTGGTTCCAAAGGAGATGTACTCCGGGCTTGTTACAGAC  
+  
FFFFFFFFFFFFFFFFFFFFFFFFFFFFFFFFFFFFFFFFFFFFFFFFFFFFFFFFFFFFFFFFFFFFFFFFFFFF:FFFFFFFFF:,F  
FFFFFFFFFFFFFFFF:FFFFFFFFFFFFFFFFFFFFFFFFFFFFFFFFFFFFFFFFFFFFFFFFFFFFFFFFFFFF:FF  
@A00155:342:HHGFNDSXY:1:2622:23357:8155 1:N:0:GAACCTAG+TCCGCATA  
TTAGATCAGCTGTGTCCACTTAAGGACTCACCTCTGGCCTATGGTCATCTCAATGCCGAGAGGGATGT  
GGAGGGCGAGAGAGAGCGACTTCTCTCGGGCCACAGCCTTACAGCTGTGGAGCACGGTATCCTCTGC  
+  
FFFFFFFFFFFFFFFFFFFFFFFFFFFFFFFFFFFFFFFFFFFFFFFFFFFFFFFFFFFFFFFFFFFFFFFFFFFF  
FFFFFFFFFFFFFFFFFFFFFFFFFFFFFFFFFFFFFFFFFFFFFFFFFFFFFFFFFFFFFFFFFFFFFFFFFFFF  
@A00155:342:HHGFNDSXY:1:2622:11080:12226 1:N:0:GAACCTAG+TCCGCATA  
GCGACTTCTCTCGGGCCACAGCCTTACAGCTGTGGAGCACGGTATCCTCTGCCGAAACAGAGGTTGG  
ACAAGACCGGAGGGGTCTCCAAGTTCCAAAGGAGATGTACTCCGGGCTTGTTACGACCTACCGTGTA  
+  
FFFFFFFFFFFFFFFFFFFFFFFFFFFFFFFFFFFFFFFFFFFFFFFFFFFFFFFFFFFFFFFFFFFFFFFFFFFF  
FFFFFFFFFFFFFFFFFFFFFFFFFFFFFFFFFFFFFFFFFFFFFFFFFFFFFFFFFFFFFFFFFFFFFFFFFFFF  
@A00155:342:HHGFNDSXY:1:2622:19244:20729 1:N:0:GAACCTAG+TCCGCATA  
GAGAGAGAGCGACTTCTCTCGGGCCACAGCCTTACAGCTGTGGAGCACGGTATCCTCTGCCGAAACA  
GAGGTTGGACAAGACCGGAGGGGTCTCCTAGTTCCAAAGGAGATGTACTCCGGGCTTGTTACGACCT  
+  
FFFFFFFFFFFFFFFFFFFFFFFFFFFFFFFFFFFFFFFFFFFFFFFFFFFFFFFFFFFFFFFFFFFFFFFFFFFF  
FFFFFFFFFFFFFFFFFFFFFFFFFFFFFFFFFFFFFFFFFFFFFFFFFFFFFFFFFFFFFFFFFFFFFFFFFFFF  
@A00155:342:HHGFNDSXY:1:2622:30192:26725 1:N:0:GAACCTAG+TCCGCATA  
GGATGTAGAGGGCGAGAGAGAGCGACTTCTCTCGGGCCACAGCCTTACAGCTGTGGAGCACGGTATC  
CTCTGCCGAAACAGAGGTTGGACAAGACCGGAGGGGTCTCCTAGTTCCAAAGGAGATGTACTCC  
+  
FFF:FFFFFFFFFFFFFFFFFFFFFFFFFFFFFFFFFFFFFFFFFFFFFFFFFFFFFFFFFFFFFFFFFFFFFFFF  
FFFFFFFFFFFFFFFFFFFFFFFFFFFFFFFFFFFFFFFFFFFFFFFFFFFFFFFFFFFFFFFFFFFFFFFFFFFF  
@A00155:342:HHGFNDSXY:1:2622:19660:37043 1:N:0:GAACCTAG+TCCGCATA  
TCAATGCCGAGAGGGATGTGGAGGGCGAGAGAGAGCGACTTCTCTCGGGCCACAGCCTTACAGCTGT  
GGAGCACGGTATCCTCTGCCGAAACAGAGGTTGGACAAGACCGGAGGGGTCTCCTAGTTCCAAAGGAG  
+  
FFFFFFFFF:F:FFFFFFFFFFFFFFFFFFFFFFFFFFFFFFFFFFFFFFFFFFFFFFFFFFFFFFFFFFFFFFFF  
FFFFFFFFFFFFFFFFFFFFFFFFFFFFFFFFFFFFFFFFFFFFFFFFFFFFFFFFFFFFFFFFFFFFFFFFFFFF  
@A00155:342:HHGFNDSXY:1:2623:31015:19163 1:N:0:GAACCTAG+TCCGCATA  
GTAGAGGGCGAGAGAGAGCGACTTCTCTCGGGCCACAGCCTTACAGCTGTGGAGCACGGTATCCTCT  
GCCGAAACAGAGGTTGGACAAGACCGGAGGGGTCTCCTAGTTCCAAAGGAGATGTACTCCGGG  
+  
FFFFFFFFFFFFFFFFFFFFFFFFFFFFFFFFFFFFFFFFFFFFFFFFFFFFFFFFFFFFFFFFFFFFFFFFFFFF  
FFFFFFFFFFFFFFFFFFFFFFFFFFFFFFFFFFFFFFFFFFFFFFFFFFFFFFFFFFFFFFFFFFFFFFFFFFFF  
@A00155:342:HHGFNDSXY:1:2623:10484:22686 1:N:0:GAACCTAG+TCCGCATA  
TTACAGCTGTGGAGCACGGTATCCTCTGCCGAAACAGAGGTTGGACAAGACCGGAGGGGTCTCCTAGT

TCCAAAGGAGATGTACTCCGGGCTTGTTACGACCTACCGTGTAAGTCGTAGTCTAGTAGGCTACCTG  
+  
FFFFFFFFFFFFFFFFFFFFFFFFFFFFFFFFFFFFFFFFFFFFFFFFFFFFFFFFFFFFFFFFFFFFFFFF  
FFFFFFFFFFFFFFFFFFFFFFFFFFFFFFFFFFFFFFFFFFFFFFFFFFFFFFFFFFFFFFFFFFFFFFFF  
@A00155:342:HHGFNDSXY:1:2623:31584:23500 1:N:0:GAACCTAG+TCCGCATA  
GAGCGACTTCTCTCGGGCCACAGCCTTACAGCTGTGGAGCACGGTATCCTCTGCCGAAACAGAGGTT  
GGACAAGACCGGAGGGGTCTCCTAGTTCCAAAGGAGATGTACTCCGGGCTTGTTACGACCTACCGTG  
+  
FFFFFFFFFFFFFFFFFFFFFFFFFFFFFFFFFFFFFFFFFFFFFFFFFFFFFFFFFFFFFFFFFFFFFFFF  
FFFFFFFFFFFFFFFFFFFFFFFFFFFFFFFFFFFFFFFFFFFFFFFFFFFFFFFFFFFFFFFFFFFFFFFF  
@A00155:342:HHGFNDSXY:1:2623:11424:24251 1:N:0:GAACCTAG+TCCGCATA  
ATCTCAATGCCGAGAGGGATGTGGAGGGCGAGAGAGAGCGACTTCTCTCGGGCCACAGCCTTACAGC  
TGTGGAGCACGGTATCCTCTGCCGAAACAGAGGTTGGACAAGACCGGAGGGGTCTCCTGGTTCCAAAG  
+  
FFFFFFFFFFFFFFFFFFFFFF:FFFFFFFFFFFFFFFFFFFFFFFFFFFFFFFFFFFFFFFFFFFFFFFF  
FFFFFFFFFFFFFFFFFFFFFFFFFFFFFFFFFFFFFFFFFFFFFFFFFFFFFFFFFFFFFFFFFFFFFFFF  
@A00155:342:HHGFNDSXY:1:2623:28040:33520 1:N:0:GAACCTAG+TCCGCATA  
GCGAGAGAGAGCGACTTCTCTCGGGCCACAGCCTTACAGCTGTGGAGCACGGTATCCTCTGCCGAA  
CAGAGGTTGGACAAGACCGGAGGGGTCTCCTGGTTCCAAAGGAGATGTACTCCGGGCTTGTT  
+  
FFFFFFFFFFFFFFFFFFFFFFFFFFFFFFFFFFFFFFFFFFFFFFFFFFFFFFFFFFFFFFFFFFFFFF  
FFFFFFFFFFFFFFFFFFFFFFFFFFFFFFFFFFFFFFFFFFFFFFFFFFFFFFFFFFFFFFFFFFFFFF  
@A00155:342:HHGFNDSXY:1:2624:21341:8453 1:N:0:GAACCTAG+TCCGCATA  
TCCTCTGCCGAAACAGAGGTTGGACAAGACCGGAGGGGTCTCCTAGTTCCAAAGGAGATGTACTCCG  
GCTTGTTACGACCTACCGTGTAAGTCGTAGTCTAGTAGGCTACCTGACGAGTCCTTTTAGGACGAA  
+  
FFFFFFFFFFFFFFFFFFFFFFFFFFFFFFFFFFFFFFFFFFFFFFFFFFFFFFFFFFFFFFFFFFFFFF  
FFFFFFFFFFFFFFFFFFFFFFFFFFFFFFFFFFFFFFFFFFFFFFFFFFFFFFFFFFFFFFFFFFFFFF  
@A00155:342:HHGFNDSXY:1:2624:2293:13354 1:N:0:GAACCTAG+TCCGCATA  
TCCTCTGCCGAAACAGAGGTTGGACAAGACCGGAGGGGTCTCCTAGTTCCAAAGGAGATGTACTCCG  
GCTTGTTACGACCTACCGTGTAAGTCGTAGTCTAGTAGGCTACCTGACGAGTCCTTTTAGGACGAA  
+  
FFFFFFFFFFFFFFF:FF:FFFFFFFFFFFF:FFFFFFFFFFFFFFFFFFFFFFFFFFFFFFFFFFFF  
F:FFFFFFFFFFFFFFF:FFFFFFFFFFFFFFFFF:FFFFFFFFFFFF:FFFFFFFFF,FFFFFFFF:FFFF  
@A00155:342:HHGFNDSXY:1:2624:26883:34460 1:N:0:GAACCTAG+TCCGCATA  
CATCTCAATGCCGAGAGGGATGTAGAGGGCGAGAGAGAGCGACTTCTCTCGGGCCACAGCCTTACAG  
CTGTGGAGCACGGTATCCTCTGCCGAAACAGAGGTTGGACAAGACCGGAGGGGTCTCCTAGTTCCAA  
+  
FFFFFFFFFFFFFFFFFFFFFFFFFFFFFFFFFFFFFFFFFFFF,FFFFFFFFFFFFFFF,F,FFFFFFFFFFFF:F:  
FFFFFFFFF:FFF,FFFF:FFFF:FFFFFFFFFFFFFFFFFFFFFFFFFFFFFFFFFFFF:FF:FFFFFFFFF:FFFF  
@A00155:342:HHGFNDSXY:1:2625:17508:4038 1:N:0:GAACCTAG+TCCGCATA  
CGACTTCTCTCGGGCCACAGCCTTACAGCTGTGGAGCACGGTATCCTCTGCCGAAACAGAGGTTGGA  
CAAGACCGGAGGGGTCTCCTAGTTCCAAAGGAGATGTACTCCGGGCTTGTTACGACCTACCGTGTA  
+  
F:F,FFFFFFFF:FFFFFFFFF,F:FFFFFF:FFFF:FFF:FFFFFFFFFFFF::FFF,F:FFFF,  
FFFF:FFFFFFFFFFFF:FFFFFFFFF:FFF:FF,FFFF:FFF:F,FFF,FFF,FF:F:FF,FFFF  
@A00155:342:HHGFNDSXY:1:2625:13630:20306 1:N:0:GAACCTAG+TCCGCATA  
GGCCTATGGTCATCTCAATGCCGAGAGGGATGTGGAGGGCGAGAGAGAGCGACTTCTCTCGGGCCAC  
AGCCTTACAGCTGTGGAGCACGGTATCCTCTGCCGAAACAGAGGTTGGACAAGACCGGAGGGGTCTCC  
+  
FFFFFFFFFFFFFFFFFFFFFFFFFFFFFFFFFFFFFFFFFFFFFFFFFFFFFFFFFFFFFFFFFFFFFF  
FFFFFFFFFFFFFFFFFFFFFFFFFFFFFFFFFFFFFFFFFFFFFFFFFFFFFFFFFFFFFFFFFFFFFF  
@A00155:342:HHGFNDSXY:1:2625:27624:30044 1:N:0:GAACCTAG+TCCGCATA  
TGCCCCACCACACCGCCTTAGATCAGCTGTGTCCACTTAAGGACTCACCTCTGGCCTATGGTCATCTC

AATGCCGAGAGGGATGTGGAGGGCGAGAGAGAGCGACTTCTCTCGGGCCCACAGCCTTACAGCTGTGG  
+  
F:FFFFFFFF:FFF:FFFFFFFFFFFFFFFF:FFFFFFFF:FFFFFFFFFFFFFFFF:FFF::FF  
FFFFFFFF:FFFFFF:FFFFFFFF:FFFFFFFFFFFFFFFF:FFFFFFFFFFFFFFFF:FF  
@A00155:342:HHGFNDSXY:1:2625:1344:35164 1:N:0:GAACCTAG+TCCGCATA  
CTTACAGCTGTGGAGCACGGTATCCTCTGCCGAAACAGAGGTTGGACAAGACCGGAGGGGTCTCCTAG  
TTCAAAGGAGATGTACTCCGGGCTTGTTACGACCTACCGTGTAAGTCGTAGTCTAGTAGGCTACCT  
+  
FFF:FFFFFFFF:FFFFFFFF,FFFFFFFF:FF::FFFFFFFF:FFFF,FFFFFF:FFFFFFFF,F  
FFFF::F::FFFF,FF::FFF:,FFFFFFFF,,FF:FFFF:F,FFFF:FFFF,FFFF,FF:,F  
@A00155:342:HHGFNDSXY:1:2626:1036:4977 1:N:0:GAACCTAG+TCCGCATA  
CTTACAGCTGTGGAGCACGGTATCCTCTGCCGAAACAGAGGTTGGACAAGACCGGAGGGGTCTCCTAG  
TTCAAAGGAGATGTACTCCGGGCTTGTTACGACCTACCGTGTAAGTCGTAGTCTAGTAGGCTACCT  
+  
FFFFFFF:FFFFFFFFFFFFFFFFFFFFFFFF:FFFFFFFFFFFFFFFF:FFFFFFFFFFFFFFFF  
FFFFF::FFFFFFFF:FF:FFFFFFFF,F:FFFFFFFF:FFFFFFFFFFFFFFFF:FFF,FFFF,FF  
@A00155:342:HHGFNDSXY:1:2626:20166:11397 1:N:0:GAACCTAG+TCCGCATA  
AATGCCGAGAGGGATGTAGAGGGCGAGAGAGAGCGACTTCTCTCGGGCCCACAGCCTTACAGCTGTGG  
AGCACGGTATCCTCTGCCGAAACAGAGGTTGGACAAGACCGGAGGGGTCTCCTAGTTCAAAGGAGAT  
+  
FFFFFFFFFFFFFFFFFFFFFFFFFFFFFFFFFFFFFFFFFFFFFFFFFFFFFFFFFFFFFFFF:FFFFFFFF  
FFFFFFFFFFFFFFFFFFFFFFFFFFFFFFFFFFFFFFFFFFFFFFFFFFFFFFFFFFFFFFFFFFFFFFFF  
@A00155:342:HHGFNDSXY:1:2626:3360:16579 1:N:0:GAACCTAG+TCCGCATA  
GACTTCTCTCGGGCCCACAGCCTTACAGCTGTGGAGCACGGTATCCTCTGCCGAAACAGAGGTTGGAC  
AAGACCGGAGGGGTCTCCTAGTTCAAAGGAGATGTACTCCGGGCTTGTTACGACCTACCGTGTAAG  
+  
FFFFFFFFFFFFFFFFFFFFFFFFFFFFFFFF:FFFFFFFFFFFFFFFFFFFFFFFFFFFFFFFFFFFF  
FF:FFFFFFFFFFFFFFFF:FFFFFFFFFFFFFFFF::FFFFFFFFFFFFFFFF:FFFF:  
@A00155:342:HHGFNDSXY:1:2626:13982:18724 1:N:0:GAACCTAG+TCCGCATA  
AGAGGGATGTGGAGGGCGAGAGAGAGCGACTTCTCTCGGGCCCACAGCCTTACAGCTGTGGAGCACGG  
TATCCTCTGCCGAAACAGAGGTTGGACAAGACCGGAGGGGTCTCCTAGTTCAAAGGAGATGTACTCC  
+  
FFFFFFFFFFFFFFFFFFFFFFFFFFFFFFFFFFFFFFFFFFFFFFFFFFFFFFFFFFFFFFFFFFFF  
FFFFFFFFFFFFFFFFFFFFFFFFFFFFFFFFFFFFFFFFFFFFFFFFFFFFFFFFFFFFFFFFFFFFFFFF  
@A00155:342:HHGFNDSXY:1:2626:14036:18756 1:N:0:GAACCTAG+TCCGCATA  
AGAGGGATGTGGAGGGCGAGAGAGAGCGACTTCTCTCGGGCCCACAGCCTTACAGCTGTGGAGCACGG  
TATCCTCTGCCGAAACAGAGGTTGGACAAGACCGGAGGGGTCTCCTAGTTCAAAGGAGATGTACTCC  
+  
FFFFFFFFFFFFFFFFFFFFFFFFFFFFFFFFFFFFFFFFFFFFFFFFFFFFFFFFFFFFFFFFFFFF  
FFFFFFFFFFFFFFFFFFFFFFFFFFFFFFFFFFFFFFFFFFFFFFFFFFFFFFFFFFFFFFFFFFFFFFFF  
@A00155:342:HHGFNDSXY:1:2626:32271:24502 1:N:0:GAACCTAG+TCCGCATA  
GTATCCTCTGCCGAAACAGAGGTTGGACAAGACCGGAGGGGTCTCCTAGTTCAAAGGAGATGTACTC  
CGGGCTTGTTACGACCTACCGTGTAAGTCGTAGTCTAGTAGGCTACCTGACGAGTCCTTTTAGGAC  
+  
FFFFFFFFFFFFFFFFFFFFFFFFFFFFFFFFFFFFFFFFFFFFFFFFFFFFFFFFFFFFFFFFFFFF  
FFFFFFFFFFFFFFFFFFFFFFFFFFFFFFFF,FFFFFFFFFFFFFFFF:FFFFFFFFFFFFFFFFFFFF  
@A00155:342:HHGFNDSXY:1:2626:29532:28119 1:N:0:GAACCTAG+TCCGCATA  
TGTGGAGGGCGAGAGAGAGCGACTTCTCTCGGGCCCACAGCCTTACAGCTGTGGAGCACGGTATCCTC  
TGCCGAAACAGAGGTTGGACAAGACCGGAGGGGTCTCCTAGTTCAAAGGAGATGTACTCCGGG  
+  
FFFFFFFFFFFFFFFFFFFFFFFFFFFFFFFFFFFFFFFFFFFFFFFFFFFFFFFFFFFFFFFFFFFF  
FFFFFFFFFFFFFFFFFFFFFFFFFFFFFFFFFFFFFFFFFFFFFFFFFFFFFFFFFFFFFFFF:FFFF,FFFFF  
@A00155:342:HHGFNDSXY:1:2627:11993:5196 1:N:0:GAACCTAG+TCCGCATA  
GAGAGGGATGTGGAGGGCGAGAGAGAGCGACTTCTCTCGGGCCCACAGCCTTACAGCTGTGGAGCACG

GTATCCTCTGCCGAAACAGAGGTTGGACAAGACCGGAGGGGTCTCCTAGTTCCAAAGGAGATGTACTC  
+  
FFFFFFFFFFFFFFFFFFFFFFFFFFFFFFFFFFFFFFFFFFFFFFFFFFFFFFFFFFFFFFFFFFFFFFFF  
FFFFF:FFFFFFFFFFFFFFFFFFFFFFFFFFFFFFFFFFFFFFFFFFFFFFFFFFFFFFFFFFFFFFFF  
@A00155:342:HHGFNDSXY:1:2627:31186:31328 1:N:0:GAACCTAG+TCCGCATA  
AGGTCATCTCAATGCCGAGAGGGATGTGGAGGGCGAGAGAGAGCGACTTCTCTCGGGCCCACAGCCTT  
ACAGCTGTGGAGCACGGTATCCTCTGCCGAAACAGAGGTTGGACAAGACCGGAGGGGTCTCC  
+  
FFFFFFFFFFFF:FFFFFFFFFFFFFFFFFFFFFFFFFFFFFFFFFFFFFFFFFFFFFFFFFFFFFFFFFFFF  
FFFFFFFFFFFFFFFFFFFFFFFFFFFFFFFFFFFFFFFFFFFFFFFFFFFFFFFFFFFFFFFFFFFFFFFF  
@A00155:342:HHGFNDSXY:1:2627:28348:36370 1:N:0:GAACCTAG+TCCGCATA  
ACTTCTCTCGGGCCCACAGCCTTACAGCTGTGGAGCACGGTATCCTCTGCCGAAACAGAGGTTGGACA  
AGACCGGAGGGGTCTCCTAGTTCCAAAGGAGATGTACTCCGGGCTTTTTCACGACCTACCGTGTAAG  
+  
FFFFFFFFFFFFFFFFFFFFFFFFFFFFFFFFFFFFFFFFFFFFFFFFFFFFFFFFFFFFFFFFFFFFFFFF  
FFFFFFFFFFFFFFFFFFFFFFFFFFFFFFFFFFFFFFFFFFFFFFFFFFFFFFFFFFFFFFFFFFFFFFFF,FFFFFFFFFFFFFFFFFFFFFFFFFFFFFFFFFFFFFFFF:FF  
@A00155:342:HHGFNDSXY:1:2628:21287:6887 1:N:0:GAACCTAG+TCCGCATA  
AGATCAGCTGTGTCCACTTAAGGACTCACCTCTGGCCTATGGTCTTCTCAATGCCGAGAGGGATGTGG  
AGGGCGAGAGAGAGCGACTTCTCTCGGGCCCACAGCCTTACAGCTGTGGAGCACGGTATCCTCTGCCG  
+  
FFFFFFFFFFFFFFFFFFFFFFFFFFFFFFFFFFFFFFFFFFFFFFFFFFFFFFFFFFFFFFFFFFFFFFFF  
FFFFFFFFFFFFFFFFFFFFFFFFFFFFFFFFFFFFFFFFFFFFFFFFFFFFFFFFFFFFFFFFFFFFFFFF,FFFF,FFFFFFFFFFFF  
@A00155:342:HHGFNDSXY:1:2628:8458:33677 1:N:0:GAACCTAG+TCCGCATA  
AGGGATGTGGAGGGCGAGAGAGAGCGACTTCTCTCGGGCCCACAGCCTTACAGCTGTGGAGCACGGTA  
TCCTCTGCCGAAACAGAGGTTGGACAAGACCGGAGGGGTCTCCTGGTTCCAAAGGAGATGTACT  
+  
FFFFFFFFFFFFFFFFFFFFFFFFFFFFFFFFFFFFFFFFFFFFFFFFFFFFFFFFFFFFFFFFFFFFFFFF  
FFFFFFFFFFFFFFFFFFFFFFFFFFFFFFFFFFFFFFFFFFFFFFFFFFFFFFFFFFFFFFFFFFFFFFFF:FFFFFFFFFFFF  
@A00155:342:HHGFNDSXY:1:2628:1524:35759 1:N:0:GAACCTAG+TCCGCATA  
CTTCTCTCGGGCCCACAGCCTTACAGCTGTGGAGCACGGTATCCTCTGCCGAAACAGAGGTTGGACAA  
GACCGGAGGGGTCTCCTAGTTCCAAAGGAGATGTACTCCGGGCTTGTTACGACCTACCGTGTAAGTC  
+  
FFFFFFFFFFFFFFFFFFFFFFFFFFFFFFFFFFFFFFFFFFFFFFFFFFFFFFFFFFFFFFFFFFFFFFFF  
FFFFFFFFFFFFFFFFFFFFFFFFFFFFFFFFFFFFFFFFFFFFFFFFFFFFFFFFFFFFFFFFFFFFFFFF,FFFFFFFF:FFFFF  
@A00155:342:HHGFNDSXY:1:2629:14434:17722 1:N:0:GAACCTAG+TCCGCATA  
CTCTATGCCGAGAGGGATGTGGAGGGCGAGAGAGAGCGACTTCTCTCGGGCCCACAGCCTTACAGCTG  
TGGAGCACGGTATCCTCTGCCGAAACAGAGGTTGGACAAGACCGGAGGGGTCTCCTAGTTCCAAAGGA  
+  
FFFFFFFFFFFFFFFFFFFF,FFFFFFFFFFFFFFFFFFFFFFFFFFFFFFFFFFFFFFFFFFFFFFFFFFFF  
FFFFFFFFFFFFFFFFFFFFFFFFFFFFFFFFFFFFFFFFFFFFFFFFFFFFFFFFFFFFFFFFFFFFFFFFFFFF  
@A00155:342:HHGFNDSXY:1:2629:32768:19664 1:N:0:GAACCTAG+TCCGCATA  
AGGGATGTGGAGGGCGAGAGAGAGCGACTTCTCTCGGGCCCACAGCCTTACAGCTGTGGAGCACGGTA  
TCCTCTGCCGAAACAGAGGTTGGACAAGACCGGAGGGGTCTCCTAGTTCCAAAGGAGATGTACTCCGG  
+  
FFFFFFFFFFFFFFFFFFFFFFFFFFFFFFFFFFFFFFFFFFFFFFFFFFFFFFFFFFFFFFFFFFFFFFFF  
FFFFFFFFFFFFFFFFFFFFFFFFFFFFFFFFFFFFFFFFFFFFFFFFFFFFFFFFFFFFFFFFFFFFFFFF:FFFFFFFFFFFF  
@A00155:342:HHGFNDSXY:1:2629:9299:22576 1:N:0:GAACCTAG+TCCGCATA  
CTATGGTCATCTCAATGCCGAGAGGGATGTGGAGGGCGAGAGAGAGCGACTTCTCTCGGGCCCACAGC  
CTTACAGCTGTGGAGCACGGTATCCTCTGCCGAAACAGAGGTTGGACAAGACCGGAGGGGTCTCCTAG  
+  
FFFFFFFFFFFFFFFFFFFFFFFFFFFFFFFFFFFFFFFFFFFFFFFFFFFFFFFFFFFFFFFFFFFFFFFF  
FFFFFFFFFFFFFFFFFFFFFFFFFFFFFFFFFFFFFFFFFFFFFFFFFFFFFFFFFFFFFFFFFFFFFFFFFFFF  
@A00155:342:HHGFNDSXY:1:2629:1398:36855 1:N:0:GAACCTAG+TCCGCATA  
ACCATAGGCCAGAGGTGAGTCCTTAAGTGGACACAGCTGATCTAAGGCGGTGTGGTGGGGCATGGGTT

TGAACCCCATGACGGTCGGAGTCTAGTAGGCTCCCTGATGAGTCCGTTCCAAGGACGAAACCGTCGT  
+  
:FFFF,FFFFFF:FFFFFFFFFFFFFF:FFFFFFFFFFFFFF, :FFFFFFFFFFFFFF  
FFF:FFFFFFFFFFFFFF:FF:FFFF:FFFF:FFFFFFFF:FFFF,FFF,:FF,,::FFFF  
@A00155:342:HHGFNDSXY:1:2630:15926:2707 1:N:0:GAACCTAG+TCCGCATA  
GCGAGAGAGAGCGACTTCTCTCGGGCCACAGCCTTACAGCTGTGGAGCACGGTATCCTCTGCCGAAA  
CAGAGGTTGGACAAGACCGGAGGGGTCTCCTAGTTCCAAAGGAGATGTACTCCGGGCTTGTTACGAC  
+  
FFFFFFFFFFFFFFFFFFFFFFFFFFFFFFFFFFFFFFFFFFFFFFFFFFFFFFFFFFFFFFFF  
FFFFFFFFFFFFFFFFFFFFFFFFFFFFFFFFFFFFFFFFFFFFFFFFFFFFFFFFFFFFFFFF  
@A00155:342:HHGFNDSXY:1:2630:9173:8171 1:N:0:GAACCTAG+TCCGCATA  
TGCCGAGAGGGATGTAGAGGGCGAGAGAGAGCGACTTCTCTCGGGCCACAGCCTTACAGCTGTGGAG  
CACGGTATCCTCTGCCGAAACAGAGGTTGGACAAGACCGGAGGGGTCTCCTAGTTCCAAAGGAGATGT  
+  
FFFFFFFFFFFFFFFFFFFFFF:FFFFFFFFFFFFFFFFFFFFFFFFFFFFFFFFFFFFFFFF  
FFFFFFFFFFFFFFFFFFFFFFFFFFFFFFFFFFFFFFFFFFFFFFFFFFFFFFFFFFFFFFFF  
@A00155:342:HHGFNDSXY:1:2630:20184:9674 1:N:0:GAACCTAG+TCCGCATA  
GTGTCCACTTAAGGACTCACCTCTGGCCTATGGTCATCTCAATGCCGAGAGGGATGTAGAGGGCGAGA  
GAGAGCGACTTCTCTCGGGCCACAGCCTTACAGCTGTGGAGCACGGTATCCTCTGCCGAAACAGAGG  
+  
FFFFFFFFFFFFFFFFFFFFFFFFFFFFFFFFFFFFFFFFFFFFFFFFFFFFFFFFFFFFFFFF  
FFFFFFFFFFFFFFFFFFFFFFFFFFFFFFFFFFFFFFFFFFFFFFFFFFFFFFFFFFFFFFFF:FFFFFFFF  
@A00155:342:HHGFNDSXY:1:2630:25165:16047 1:N:0:GAACCTAG+TCCGCATA  
GGACAAGACCGGAGGGGTCTCCTAGTTCCAAAGGAGATGTACTCCGGGCTTGTTACGACCTACCGTG  
TAAGTCGTAGTCTAGTAGGCTACCTGACGAGTCCTTTTTAGGACGAACTTACACAACCTCAAAGAGTA  
+  
FFFFFFFFFFFFFFFFFFFFFFFFFFFFFFFFFFFFFFFFFFFFFFFFFFFFFFFFFFFFFFFF  
FFFFFFFFFFFFFFFFFFFFFFFFFFFFFFFFFFFFFFFFFFFFFFFFFFFFFFFFFFFFFFFF:FFFFFFFF  
@A00155:342:HHGFNDSXY:1:2630:25599:16203 1:N:0:GAACCTAG+TCCGCATA  
GGACAAGACCGGAGGGGTCTCCTAGTTCCAAAGGAGATGTACTCCGGGCTTGTTACGACCTACCGTG  
TAAGTCGTAGTCTAGTAGGCTACCTGACGAGTCCTTTTTAGGACGAACTTACACAACCTCAAAGAGTA  
+  
FFFFFFFFFFFFFFFFFFFFFFFFFFFFFFFFFFFFFFFFFFFFFFFFFFFFFFFFFFFFFFFF  
FFFFFFFFFFFFFFFFFFFFFFFFFFFFFFFFFFFFFFFFFFFFFFFFFFFFFFFFFFFFFFFF  
@A00155:342:HHGFNDSXY:1:2630:17680:21371 1:N:0:GAACCTAG+TCCGCATA  
CTCAATGCCGAGAGGGATGTGGAGGGCGAGAGAGAGCGACTTCTCTCGGGCCACAGCCTTACAGCTG  
TGGAGCACGGTATCCTCTGCCGAAACAGAGGTTGGACAAGACCGGAGGGGTCTCCTAGTTCCAAAGGA  
+  
FFFFFFFFFFFFFFFFFFFFFFFFFFFFFFFFFFFFFFFFFFFFFFFFFFFFFFFFFFFFFFFF  
FFFFFFFFFFFFFFFFFFFFFFFFFFFFFFFFFFFFFFFFFFFFFFFFFFFFFFFFFFFFFFFF:FFFFFFFF  
@A00155:342:HHGFNDSXY:1:2630:17445:22028 1:N:0:GAACCTAG+TCCGCATA  
CTCAATGCCGAGAGGGATGTGGAGGGCGAGAGAGAGCGACTTCTCTCGGGCCACAGCCTTACAGCTG  
TGGAGCACGGTATCCTCTGCCGAAACAGAGGTTGGACAAGACCGGAGGGGTCTCCTAGTTCCAAAGGA  
+  
FFFFFFFFFFF,FFFF:FFFFFFFFFFFFFFFF,FFFFFFFFFFFFFFFFFFFFFFFF  
FFFFFFFFFFFFFFFFFFFFFFFFFFFFFFFF:FFFFFFFFFFFFFFFFFFFFFFFF  
@A00155:342:HHGFNDSXY:1:2630:11541:30718 1:N:0:GAACCTAG+TCCGCATA  
CGAGAGAGAGCGACTTCTCTCGGGCCACAGCCTTACAGCTGTGGAGCACGGTATCCTCTGCCGAAAC  
AGAGGTTGGACAAGACCGGAGGGGTCTCCTAGTTCCAAAGGAGATGTACTCCGGGCTTGTTACGACC  
+  
FFFFFFFFFFFFFFFFFFFFFFFFFFFFFFFFFFFFFFFFFFFFFFFFFFFFFFFFFFFFFFFF  
FFFFFFFFFFFFFFFFFFFFFFFFFFFFFFFFFFFFFFFFFFFFFFFFFFFFFFFFFFFFFFFF  
@A00155:342:HHGFNDSXY:1:2630:31665:31219 1:N:0:GAACCTAG+TCCGCATA  
TGTCCACTTAAGGACTCACCTCTGGCCTATGGTCATCTCAATGCCGAGAGGGATGTGGAGGGCGAGAG

AGAGCGACTTCTCTCGGGCCACAGCCTTACAGCTGTGGAGCACGGTATCCTCTGCCGAAACAGAGGT  
+  
FFFFFFFF:FFFFFFFFFFFFFFFFFFFFFFFFFFFFFFFFFFFFFFFFFFFFFFFFFFFFFFFFFFFFFFFF:  
FFFFFFFFFFFFFFFFFFFFFFFFFFFFFFFFFFFFFFFFFFFFFFFFFFFFFFFFFFFFFFFFFFFFFFFF:  
@A00155:342:HHGFNDSXY:1:2630:11641:31641 1:N:0:GAACCTAG+TCCGCATA  
CGAGAGAGAGCGACTTCTCTCGGGCCACAGCCTTACAGCTGTGGAGCACGGTATCCTCTGCCGAAAC  
AGAGGTTGGACAAGACCGGAGGGGTCTCCTAGTTCAAAGGAGATGTACTCCGGGCTTGTTACGACC  
+  
FFFFFFFFFFFFFFFFFFFFFFFFFFFFFFFFFFFFFFFFFFFFFFFFFFFFFFFFFFFFFFFFFFFFFFFF:  
FFFFFFFFFFFFFFFFFFFFFFFFFFFFFFFFFFFFFFFFFFFFFFFFFFFFFFFFFFFFFFFFFFFFFFFF:  
@A00155:342:HHGFNDSXY:1:2630:8196:35634 1:N:0:GAACCTAG+TCCGCATA  
CTGGCCTATGGTCATCTCAATGCCGAGAGGGATGTGGAGGGCGAGAGAGAGCGACTTCTCTCGGGCCC  
ACAGCCTTACAGCTGTGGAGCACGGTATCCTCTGCCGAAACAGAGGTTGGACAAGACCGGAGGGGTCT  
+  
FFFFFFFFFFFFFFFFFFFFFFFFFFFFFFFFFFFFFFFFFFFFFFFFFFFFFFFFFFFFFFFFFFFFFFFF:  
FFFFFFFFFFFFFFFFFFFFFFFFFFFFFFFFFFFFFFFFFFFFFFFFFFFFFFFFFFFFFFFFFFFFFFFF:  
@A00155:342:HHGFNDSXY:1:2631:27914:15201 1:N:0:GAACCTAG+TCCGCATA  
GGATGTGGAGGGCGAGAGAGAGCGACTTCTCTCGGGCCACAGCCTTACAGCTGTGGAGCACGGTATC  
CTCTGCCGAAACAGAGGTTGGACAAGACCGGAGGGGTCTCCTAGTTCAAAGGAGATGTACTCC  
+  
FFFFFFFFFFFFFFFFFFFFFFFFFFFFFFFFFFFFFFFFFFFFFFFFFFFFFFFFFFFFFFFFFFFFFFFF:  
FFFFFFFFFFFFFFFFFFFFFFFFFFFFFFFFFFFFFFFFFFFFFFFFFFFFFFFFFFFFFFFFFFFFFFFF:  
@A00155:342:HHGFNDSXY:1:2631:7084:21872 1:N:0:GAACCTAG+TCCGCATA  
CTTCTCTCGGGCCACAGCCTTACAGCTGTGGAGCACGGTATCCTCTGCCGAAACAGAGGTTGGACAA  
GACCGGAGGGGTCTCCTAGTTCAAAGGAGATGTACTCCGGGCTTGTTACGACCTACCG  
+  
FFFFFFFFFFFFFFFFFFFFFFFFFFFFFFFFFFFFFFFFFFFFFFFFFFFFFFFFFFFFFFFFFFFFFFFF:  
FFFFFFFFFFFFFFFFFFFFFFFFFFFFFFFFFFFFFFFFFFFFFFFFFFFFFFFFFFFFFFFFFFFFFFFF:  
@A00155:342:HHGFNDSXY:1:2631:13946:24236 1:N:0:GAACCTAG+TCCGCATA  
TGTAGAGGGCGAGAGAGAGCGACTTCTCTCGGGCCACAGCCTTACAGCTGTGGAGCACGGTATCCTC  
TGCCGAAACAGAGGTTGGACAAGACCGGAGGGGTCTCCTAGTTCAAAGGAGATGTACT  
+  
FFFFFFFFFFFFFFFFFFFFFFFFFFFFFFFFFFFFFFFFFFFFFFFFFFFFFFFFFFFFFFFFFFFFFFFF:  
FFFFFFFFFFFFFFFFFFFFFFFFFFFFFFFFFFFFFFFFFFFFFFFFFFFFFFFFFFFFFFFFFFFFFFFF:  
@A00155:342:HHGFNDSXY:1:2631:32913:30686 1:N:0:GAACCTAG+TCCGCATA  
TGGAGGGCGAGAGAGAGCGACTTCTCTCGGGCCACAGCCTTACAGCTGTGGAGCACGGTATCCTCTG  
CCGAAACAGAGGTTGGACAAGACCGGAGGGGTCTCCTAGTTCAAAGGAGATGTACTCCGGGCTTGTT  
+  
FFFFFFFFFFFFFFFFFFFFFFFFFFFFFFFFFFFFFFFFFFFFFFFFFFFFFFFFFFFFFFFFFFFFFFFF:  
FFFFFFFFFFFFFFFFFFFFFFFFFFFFFFFFFFFFFFFFFFFFFFFFFFFFFFFFFFFFFFFFFFFFFFFF:  
@A00155:342:HHGFNDSXY:1:2631:9751:36417 1:N:0:GAACCTAG+TCCGCATA  
GTATCCTCTGCCGAAACAGAGGTTGGACAAGACCGGAGGGGTCTCCTAGTTCAAAGGAGATGTACTC  
CGGGCTTGTTACGACCTACCGTGTAAGTCGTAGTCTAGTAGGCTACCTGACGAGTCCTTTTAGGAC  
+  
FFFFFFFFFFFFFFFFFFFFFFFFFFFFFFFFFFFFFFFFFFFFFFFFFFFFFFFFFFFFFFFFFFFFFFFF:  
FFFFFFFFFFFFFFFFFFFFFFFFFFFFFFFFFFFFFFFFFFFFFFFFFFFFFFFFFFFFFFFFFFFFFFFF:  
@A00155:342:HHGFNDSXY:1:2632:27037:7607 1:N:0:GAACCTAG+TCCGCATA  
AGAGAGAGCGACTTCTCTCGGGCCACAGCCTTACAGCTGTGGAGCACGGTATCCTCTGCCGAAACAG  
AGGTTGGACAAGACCGGAGGGGTCTCCTGGTTCAAAGGAGATGTACTCCGGGCTTGTTACGACCTA  
+  
FFFFFFFFFFFFFFFFFFFFFFFFFFFFFFFFFFFFFFFFFFFFFFFFFFFFFFFFFFFFFFFFFFFFFFFF:  
FFFFFFFFFFFFFFFFFFFFFFFFFFFFFFFFFFFFFFFFFFFFFFFFFFFFFFFFFFFFFFFFFFFFFFFF:  
@A00155:342:HHGFNDSXY:1:2632:31919:18286 1:N:0:GAACCTAG+TCCGCATA  
AGAGAGAGCGACTTCTCTCGGGCCACAGCCTTACAGCTGTGGAGCACGGTATCCTCTGCCGAAACAG

AGGTTGGACAAGACCGGAGGGGTCTCCTAGTTCCAAAGGAGATGTACTCCGGGCTTGTTACACGACCTA  
+  
FFFFFFFFFFFFFFFFFFFFFFFFFFFFFFFFFFFFFFFFFFFFFFFFFFFFFFFFFFFFFFFFFFFFFFFFF  
FFFFFFFFFFFFFFFFFFFFFFFFFFFFFFFFFFFFFFFFFFFFFFFFFFFFFFFFFFFFFFFFFFFFFFFFF:  
@A00155:342:HHGFNDSXY:1:2633:2284:24455 1:N:0:GAACCTAG+TCCGCATA  
GAGCGACTTCTCTCGGGCCACAGCCTTACTGCTGTGGAGCACGGTATCCTCTGCCGAAACAGAGGTT  
GGACAAGACCGGAGGGGTCTCCTAGTTCCAAAGGAGATGTACTCCGGGCTTGTTACACGACCTACCGTG  
+  
F:F:FF:FFFFFFFFF:FFFFFFFFFFFFFFFFF:FF:FFFFFFFFFFFFFFFFF:FFFFFFF  
:FFFFFF:FFF::FFFFFFFF:FFFFFFFF:FFFFFFFFF:,F:F:F::FFFFF,:FF:FFFFFFF:  
@A00155:342:HHGFNDSXY:1:2633:30472:24549 1:N:0:GAACCTAG+TCCGCATA  
CCTCTGGCCTATGGTCATCTCTATGCCGAGAGGGATGTGGAGGGCGAGAGAGAGCGACTTCTCTCGGG  
CCCACAGCCTTACAGCTGTGGAGCACGGTATCCTCTGCCGAAACAGAGGTTGGACAAGAC  
+  
FFFFFFFFFFFFFFFFFFFFFFFFFFFFFFFFFFFFFFFFFFFFFFFFFFFFFFFFFFFFFFFFFFFFFFFFF  
FFFFFFFFFFFFFFFFFFFFFFFFFFFFFFFFFFFFFFFFFFFFFFFFFFFFFFFFFFFFFFFFFFFFFFFFF  
@A00155:342:HHGFNDSXY:1:2633:11433:28839 1:N:0:GAACCTAG+TCCGCATA  
CTTCTCTCGGGCCACAGCCTTACAGCTGTGGAGCACGGTATCCTCTGCCGAAACAGAGGTTGGACAA  
GACCGGAGGGGTCTCCTAGTTCCAAAGGAGATGTACTCAGGGCTTGTTACACGACCTACCGTGTAAGTC  
+  
FFFFFFFFFFFF:FFFFFF:FFFFFFFFFFFFFFF,FF,,FFFFFFFFFFFFFFFFF:FFFFFFFFF  
FFFFF:FFFFFF:FFFFFFFFFFFFFFFFF,FFFFFF,F,FFF:FFFFFFFFFFFF:FFFFFFF,:F  
@A00155:342:HHGFNDSXY:1:2633:31783:34178 1:N:0:GAACCTAG+TCCGCATA  
AGAGAGAGCGACTTCTCTCGGGCCACAGCCTTACAGCTGTGGAGCACGGTATCCTCTGCCGAAACAG  
AGGTTGGACAAGACCGGAGGGGTCTCCTAGTTCCAAAGGAGATGTACTCCGGGCTTGTTACACGACCTA  
+  
FFFFFFFFFFFFFFFFFFFFFFFFFFFFFFFFFFFFFFFFFFFFFFFFFFFFFFFFFFFFFFFFFFFFFFFFF  
FFFFFFFFFFFFFFFFFFFFFFFFFFFFFFFFFFFFFFF,FFFFFFFFFFFFFFFFFFFFFFFFFFFFFFF  
@A00155:342:HHGFNDSXY:1:2633:11469:34256 1:N:0:GAACCTAG+TCCGCATA  
GAGCGACTTCTCTCGGGCCACAGCCTTACAGCTGTGGAGCACGGTATCCTCTGCCGAAACAGAGGTT  
GGACAAGACCGGAGGGGTCTCCTAGTTCCAAAGGAGATGTACTCCGGGCTTGTTACACGACCTACCGTG  
+  
FFFFFFFFFFFFFFFFFFFFFFFFFFFF:FFFFFFFFFFFFFFFFFFFFF:FFFFFFFFFFFFFFFFFFFFF  
FFFFF:FFFFFFFFFFFFFFFFFFFFFFFFFFFFFFFFFFFFFFFFFFFFFFFFFFFFFFFFFFFFFFFFF  
@A00155:342:HHGFNDSXY:1:2633:31430:34475 1:N:0:GAACCTAG+TCCGCATA  
AGAGAGAGCGACTTCTCTCGGGCCACAGCCTTACAGCTGTGGAGCACGGTATCCTCTGCCGAAACAG  
AGGTTGGACAAGACCGGAGGGGTCTCCTAGATCCAAAGGAGATGTACTCCGGGCTTGTTACACGACCTA  
+  
FFFFFFFFF:FFFFFFFFFFFFFFFFFFFFF:FFFFFF:FFF:FFFFFF:FFFFFFFFFFFFFFFFFFFFF  
FFFFFFFFFFFFF,FFFFFFFFFF,FFFFFFFFF,FF:FF::FFFFF:FFFF:FFFFFF:FFFFFF:FFF:F  
@A00155:342:HHGFNDSXY:1:2634:16007:1219 1:N:0:GAACCTAG+TCCGCATA  
CTGGCCTATGGTCATCTCAATGCCGAGAGGGATGTGAAGGGCGAGAGAGAGCGACTTCTCTCGGGCCC  
ACAGCCTTACAGCTGTGGAGCACGGTATCCTCTGCCGAAACAGAGGTTGGACAAGACCGGAG  
+  
FFFFFFFFFFFFFFFFFFFFFFFFFFFFFFFFFFFFFFFFFFFFFFFFFFFFFFFFFFFFFFFFFFFFFFFFF  
FFFFFFFFFFFFFFFFFFFFFFFFFFFFFFFFFFFFFFFFFFFFFFFFFFFFFFFFFFFFFFFFFFFFFFFFF  
@A00155:342:HHGFNDSXY:1:2634:3242:14340 1:N:0:GAACCTAG+TCCGCATA  
GAGCGACTTCTCTCGGGCCACAGCCTTACAGCTGTGGAGCACGGTATCCTCTGCCGAAACAGAGGTT  
GGACAAGACCGGAGGGGTCTCCTAGTTCCAAAGGAGATGTACTCCGGGCTTGTTACACGACCTACCGTG  
+  
FFFFFFFFFFFFFFFFFFFFFFFFFFFFFFFFFFFFFFFFFFFFFFFFFFFFFFFFFFFFFFFFFFFFFFFFF  
FFFFFFF:FFFFFFFFFFFFFFFFFFFFFFFFFFFFFFFFFFFFFFFFFFFFFFFFFFFFFFFFFFFFFFFFF  
@A00155:342:HHGFNDSXY:1:2634:28989:26804 1:N:0:GAACCTAG+TCCGCATA  
GTCATCTCAATGCCGAGAGGGATGTGGAGGGCGAGAGAGAGCGACTTCTCTCGGGCCACAGCCTTAC



AGCTGTGGAGCACGGTATCCTCTGCCGAAACAGAGGTTGGACAAGACCGGAGGGGTCTCCTAGTTCCA  
+  
FFFFFFFFFFFFFFFFFFFFFFFFFFFFFFFFFFFFFFFFFFFFFFFFFFFFFFFFFFFFFFFFFFFFFFFF:FFFFFFFFFFFFFFF  
FFFFFFFFFFFFFFFFFFFFFFFFFFFFFFFFFFFFFFFFFFFFFFFFFFFFFFFFFFFFFFFFFFFFFFFFFFFFFFFF  
@A00155:342:HHGFNDSXY:1:2634:31693:27226 1:N:0:GAACCTAG+TCCGCATA  
TGTGGAGGGCGAGAGAGAGCGACTTCTCTCGGGCCCACAGCCTTACAGCTGTGGAGCACGGTATCCTC  
TGCCGAAACAGAGGTTGGACAAGACCGGAGGGGTCTCCTAGTTCCAAAGGAGATGTACTCCGGG  
+  
FFFFFFFFFFFFFFFFFFFFFFFFFFFFFFFFFFFFFFFFFFFFFFFFFFFFFFFFFFFFFFFFFFFFFFFFFFFFF  
FFFFFFFFFF:FF:FFFFFFFFFFFFFFFFFFFFFFFFFFFFFFFFFFFFFFFFFFFFFFFFFFFFFFFFFFFFFFF  
@A00155:342:HHGFNDSXY:1:2634:29677:27492 1:N:0:GAACCTAG+TCCGCATA  
GTCATCTCAATGCCGAGAGGGATGTGGAGGGCGAGAGAGAGCGACTTCTCTCGGGCCCACAGCCTTAC  
AGCTGTGGAGCACGGTATCCTCTGCCGAAACAGAGGTTGGACAAGACCGGAGGGGTCTCCTAGTTCCA  
+  
FFFFFFFFFFFFFFFFFFFFFFFFFFFFFFFFFFFFFFFFFFFFFFFFFFFFFFFFFFFFFFFFFFFFFFFFFFFFF  
FFFFFFFFFFFFFFFFFFFFFFFFFFFFFFFFFFFFFFFFFFFFFFFFFFFFFFFFFFFFFFFFFFFFFFFFFFFFF  
@A00155:342:HHGFNDSXY:1:2634:2492:29042 1:N:0:GAACCTAG+TCCGCATA  
GCTGTGTCCACTTAAGGACTCACCTCTGGCCTATGGTCATCTCAATGCCGAGAGGGATGTGAAGGGCG  
AGAGAGAGCGACTTCTCTCGGGCCCACAGCCTTACAGCTGTGGAGCACGGTATCCTCTGCCGAAACAG  
+  
FFFFFFFFFFFFFFFFFFFFFFFFFFFFFFFFFFFFFFFFFFFFFFFFFFFFFFFFFFFFFFFFFFFFFFFFFFFFF  
FFFFFFFFFFFFFFFFFFFFFFFFFFFFFFFFFFFFFFFFFFFFFFFFFFFFFFFFFFFFFFFFFFFFFFFFFFFFF  
@A00155:342:HHGFNDSXY:1:2634:15338:30874 1:N:0:GAACCTAG+TCCGCATA  
GTCATCTCAATGCCGAGAGGGATGTGGAGGGCGAGAGAGAGTGAAGGACTTCTCTCGGGCCCACAGCCTTAC  
AGCTGTGGAGCACGGTATCCTCTGCCGAAACAGAGGTTGGACAAGACCGGAGGGGTCTCCTAGTTCCA  
+  
FFFFFFFFFFFFFFFFFFFFFFFFFFFFFFFFFFFFFFFFFFFFFFFFFFFFFFFFFFFFFFFFFFFFFFFFFFFFF  
FFFFFFFFFFFFFFFFFFFFFFFFFFFFFFFFFFFFFFFFFFFFFFFFFFFFFFFFFFFFFFFFFFFFFFFFFFFFF  
@A00155:342:HHGFNDSXY:1:2635:11153:8375 1:N:0:GAACCTAG+TCCGCATA  
AGGGATGTGGAGGGCGAGAGAGAGCGACTTCTCTCGGGCCCACAGCCTTACAGCTGTGGAGCACGGTA  
TCCTCTGCCGAAACAGAGGTTGGACAAGACCGGAGGGGTCTCCTGGTTCCAAAGGAGATGTACTCCG  
+  
FFFFFFF,FFFFFFFFFFFFFFFFFFFFFFFFFFFFFFFFFFFFFFFFFFFFFFFFFFFFFFFFFFFFFFFFFFFFF  
FFFFFFFFFFFFFFFFFFFFFFFFFFFFFFFFFFFFFFFFFFFFFFFFFFFFFFFFFFFFFFFFFFFFFFFFFFFFF  
@A00155:342:HHGFNDSXY:1:2635:21079:19523 1:N:0:GAACCTAG+TCCGCATA  
GGATGTGGAGGGCGAGAGAGAGCGACTTCTCTCGGGCCCACAGCCTTACAGCTGTGGAGCACGGTATC  
CTCTGCCGAAACAGAGGTTGGACAAGACCGGAGGGGTCTCCTGGTTCCAAAGGAGATGTACTCC  
+  
FFFFFFFFFFFFFFFFFFFFFFFFFFFFFFFFFFFFFFFFFFFFFFFFFFFFFFFFFFFFFFFFFFFFFFFFFFFFF  
FFFFFFFFFFFFFFFFFFFFFFFFFFFFFFFFFFFFFFFFFFFFFFFFFFFFFFFFFFFFFFFFFFFFFFFFFFFFF  
@A00155:342:HHGFNDSXY:1:2635:5348:20087 1:N:0:GAACCTAG+TCCGCATA  
AAGGACTCTCCTCTGGCCTATGGTCATCTCAATGCCGAGAGGGATGTGGAGGGCGAGAGAGAGCGACT  
TCTCTCGGGCCCACAGCCTTACAGCTGTGGAGCACGGTATCCTCTGCCGAAACAGAGGTTGGACAAGA  
+  
FFFFFFFFFFFFFFFFFFFFFFFFFFFFFFFFFFFFFFFFFFFFFFFFFFFFFFFFFFFFFFFFFFFFFFFFFFFFF  
FFFFFFFFFFFFFFFFFFFFFFFFFFFFFFFFFFFFFFFFFFFFFFFFFFFFFFFFFFFFFFFFFFFFFFFFFFFFF  
@A00155:342:HHGFNDSXY:1:2636:30083:10222 1:N:0:GAACCTAG+TCCGCATA  
CATCTCAATGCCGAGAGGGATGTGGAGGGCGAGAGAGAGCGACTTCTCTCGGGCCCACAGCCTTACAG  
CTGTGGAGCACGGTATCCTCTGCCGAAACAGAGGTTGGACAAGACCGGAGGGGTCTCCTTGTTCAAA  
+  
FFFFFFFFFFFFFFFFFFFFFFFFFFFFFFFFFFFFFFFFFFFFFFFFFFFFFFFFFFFFFFFFFFFFFFFFFFFFF  
FFFFFFFFFFFFFFFFFFFFFFFFFFFFFFFFFFFFFFFFFFFFFFFFFFFFFFFFFFFFFFFFFFFFFFFFFFFFF  
@A00155:342:HHGFNDSXY:1:2636:30020:14716 1:N:0:GAACCTAG+TCCGCATA  
GGCATAGAGATGACCATAGGCCAGAGGTGAGTCCTTAAGTGGACACAGCTGATCTAAGGCGGTGTGGC

GGGGCATGGGTTTGAACCCCATGACGGTCGGAGTCTAGTAGGCTCCCTGATGAGTCCGTTCCAAGGA  
+  
FFFF:FFFFFFFFFFFFFFFFFFFFFFFFFFFFFFFFFFFFFFFFFFFFFFFFFFFFFFFFFFFFFFFFFFFF  
FFFFFFFFFFFFFFFFFFFFFFFFFFFFFFFFFFFFFFFFFFFFFFFFFFFFFFFFFFFFFFFFFFFFFFFFFFFF  
@A00155:342:HHGFNDSXY:1:2637:21856:24032 1:N:0:GAACCTAG+TCCGCATA  
TGTGGAGGGCGAGAGAGAGCGACTTCTCTCGGGCCACAGCCTTACAGCTGTGGAGCACGGTATCCTC  
TGCCGAAACAGAGGTTGGACAAGACCGGAGGGGTCTCCTAGTTCCAAAGGAGATGTACTCCGGG  
+  
:FFFFFFFFFFFFFFFFFFFFFFFFFFFFFFFFFFFFFFFFFFFFFFFFFFFFFFFFFFFFFFFFFFFFFFFF  
FFFFFFFFFFFFFFFFFFFFFFFFFFFFFFFFFFFFFFFFFFFFFFFFFFFFFFFFFFFFFFFFFFFFFFFFFFFF  
@A00155:342:HHGFNDSXY:1:2637:26711:24486 1:N:0:GAACCTAG+TCCGCATA  
TCCTCTGCCGAAACAGAGGTTGGACAAGACCGGAGGGGTCTCCTAGTTCCAAAGGAGATGTACTCCGG  
GCTTGTTACGACCTACCGTGTAAAGTCGTAGTCTAGTAGGCTACCTGACGAGTCCTTTTAGGACGAA  
+  
F:FFFFFFFFFFFF:FFFFFFFFFFFFFFFFFFFFFFFFFFFFFFFFFFFFFFFFFFFFFFFFFFFFFFFFFFFF  
FFFFFFFFFFFF,FFFFFFFFFFFF:FFF,FF:FFFF:FFFFFFFFFFFFFFFF:F:FFFF,:FFF,:FFFF  
@A00155:342:HHGFNDSXY:1:2637:27389:24565 1:N:0:GAACCTAG+TCCGCATA  
TCTCTCGCCCTCCACATCCCTCTCGGCATTGAGATGACCATAGGCCAGAGGTGAGTCCTTAAGTGGAC  
ACAGCTGATCTAAGGCGGTGTGGTGGGGCATGGGTTTGAACCCCATGACGGTCGGAGTCTAGTAGGC  
+  
FFFFFFFFFFFFFFFFFFFFFFFFFFFFFFFFFFFFFFFFFFFFFFFFFFFFFFFFFFFFFFFFFFFFFFFFFFFF  
FFFFFFFFFFFFFFFFFFFFFFFFFFFFFFFFFFFFFFFFFFFFFFFFFFFFFFFFFFFFFFFFFFFFFFFFFFFF  
@A00155:342:HHGFNDSXY:1:2637:5692:29450 1:N:0:GAACCTAG+TCCGCATA  
ATGCCGAGAGGGATGTAGAGGGCGAGAGAGAGCGACTTCTCTCGGGCCACAGCCTTACAGCTGTGGA  
GCACGGTATCCTCTGCCGAAACAGAGGTTGGACAAGACCGGAGGGGTCTCCTAGTTCCAAAGGAGATG  
+  
FFFFFFFFFFFFFFFFFFFFFFFFFFFFFFFFFFFFFFFFFFFFFFFFFFFFFFFFFFFFFFFFFFFFFFFFFFFF  
FFFFFFFFFFFFFFFFFFFFFFFFFFFFFFFFFFFFFFFFFFFFFFFFFFFFFFFFFFFFFFFFFFFFFFFFFFFF  
@A00155:342:HHGFNDSXY:1:2638:10041:19507 1:N:0:GAACCTAG+TCCGCATA  
CACCTCTGGCCTATGGTCATCTCAATGCCGAGAGGGATGTGAAGGGCGAGAGAGCGACTTCTCTCG  
GGCCACAGCCTTACAGCTGTGGAGCACGGTATCCTCTGCCGAAACAGAGGTTGGACAAGACCGGAG  
+  
FFFFFFFFFFFFFFFFFFFFFFFFFFFFFFFFFFFFFFFFFFFFFFFFFFFFFFFFFFFFFFFFFFFFFFFFFFFF  
FFFFFFFFFFFFFFFFFFFFFFFFFFFFFFFFFFFFFFFFFFFFFFFFFFFFFFFFFFFFFFFFFFFFFFFFFFFF  
@A00155:342:HHGFNDSXY:1:2639:21314:2895 1:N:0:GAACCTAG+TCCGCATA  
GGCCAGAGGTGAGTCCTTAAGTGGACACAGCTGATCTAAGGCGGTGTAGCGGGGCATGGGTTTGAACC  
CCCATGACGGTCGGAGTCTAGTAGGCTCCCTGATGAGTCCGTTCCAAGGACGAAACCGTCGTTAC  
+  
FFFFFFFFFFFFFFFFFFFFFFFFFFFFFFFFFFFFFFFFFFFFFFFFFFFFFFFFFFFFFFFFFFFFFFFFFFFF  
FFFFFFFFFFFFFFFFFFFFFFFFFFFFFFFFFFFFFFFFFFFFFFFFFFFFFFFFFFFFFFFFFFFFFFFFFFFF  
@A00155:342:HHGFNDSXY:1:2639:4743:15123 1:N:0:GAACCTAG+TCCGCATA  
GAGAGAGCGACTTCTCTCGGGCCACAGCCTTACAGCTGTGGAGCACGGTATCCTCTGCCGAAACAGA  
GGTTGGACAAGACCGGAGGGGTCTCCTGGTTCCAAAGGAGATGTACTCCGGGCTTGTTACGACCTAC  
+  
FFFFFFFFFFFFFFFFFFFFFFFFFFFFFFFFFFFFFFFFFFFFFFFFFFFFFFFFFFFFFFFFFFFFFFFFFFFF  
F:FFFFFFFFFFFFFFFFFFFFFFFFFFFFFFFFFFFFFFFFFFFFFFFFFFFFFFFFFFFFFFFFFFFFFFFF  
@A00155:342:HHGFNDSXY:1:2639:9182:16517 1:N:0:GAACCTAG+TCCGCATA  
CTTCTCTCGGGCCACAGCCTTACAGCTGTGGAGCACGGTATCCTCTGCCGAAACAGAGGTTGGACAA  
GACCGGAGGGGTCTCCTAGTTCCAAAGGAGATGTACTCCGGGCTTGTTACGACCTACCGTGTAAAGTC  
+  
FFFFFFFFFFFFFFFFFFFFFFFFFFFFFFFFFFFFFFFFFFFFFFFFFFFFFFFFFFFFFFFFFFFFFFFFFFFF  
FFFFFFFFFFFFFFFFFFFFFFFFFFFFFFFFFFFFFFFFFFFFFFFFFFFFFFFFFFFFFFFFFFFFFFFFFFFF  
@A00155:342:HHGFNDSXY:1:2639:3378:18928 1:N:0:GAACCTAG+TCCGCATA  
TCCTCTGCCGAAACAGAGGTTGGACAAGACCGGAGGGGTCTCCTAGTTCCAAAGGAGATGTACTCCGG

GCTTGTTACACGACCTACCGTGTAAGTCGTAGTCTAGTAGGCTACCTGACGAGTCCTTTTTAGGACGAA  
+  
FFFFFFFFFFFFFFFFFFFFFFFFFFFFFFFFFFFFFFFFFFFFFFFFFFFFFFFFFFFFFFFFFFFFFFFFFFFFFFFF  
FF,FFFFFFFFFFFFFFFFFFFFFFFFFFFFFFFFFFFFFFFFFFFFFFFFFFFFFFFFFFFFFFFFFFFFFFFF:F  
@A00155:342:HHGFNDSXY:1:2640:14000:7138 1:N:0:GAACCTAG+TCCGCATA  
AGAGAGAGCGACTTCTCTCGGGCCACAGCCTTACAGCTGTGGAGCACGGTATCCTCTGCCGAAACAG  
AGGTTGGACAAGACCGGAGGGGTCTCCTAGTTCCAAAGGAGATGTACTCCGGGCTTGTTACGACCTA  
+  
FFFFFFFFFFFFFFFFFFFFFFFFFFFFFFFFFFFFFFFFFFFFFFFFFFFFFFFFFFFFFFFFFFFFFFFFFFFFFFFF  
FFFFFFFFFFFFFFFFFFFFFFFFFFFFFFFFFFFFFFFFFFFFFFFFFFFFFFFFFFFFFFFFFFFFFFFFFFFFFFFF  
@A00155:342:HHGFNDSXY:1:2640:12852:11475 1:N:0:GAACCTAG+TCCGCATA  
GGATGTGGAGGGCGAGAGAGAGCGACTTCTCTCGGGCCACAGCCTTACAGCTGTGGAGCACGGTATC  
CTCTGCCGAAACAGAGGTTGGACAAGACCGGAGGGGTCTCCTAGTTCCAAAGGAGATGTACTCC  
+  
FFFFFFFFFFFFFFFFFFFFFFFFFFFFFFFFFFFFFFFFFFFFFFFFFFFFFFFFFFFFFFFFFFFFFFFFFFFFFFFF  
FFFFFFFFFFFFFFFFFFFFFFFFFFFFFFFFFFFFFFFFFFFFFFFFFFFFFFFFFFFFFFFFFFFFFFFFFFFFFFFF  
@A00155:342:HHGFNDSXY:1:2640:31503:11960 1:N:0:GAACCTAG+TCCGCATA  
GACTTCTCTCGGGCCACAGCCTTACAGCTGTGGAGCACGGTATCCTCTGCCGAAACAGAGGTTGGAC  
AAGACCGGAGGGGTCTCCTAGTTCCAAAGGAGATGTACTCCGGGCTTGTTACGACCTACCGTGTAAG  
+  
FFFFFFFFFFFFFFFFFFFFFFFFFFFFFFFFFFFFFFFFFFFFFFFFFFFFFFFFFFFFFFFFFFFFFFFFFFFFFFFF  
FFFFFFFFFFFFFFFFFFFFFFFFFFFFFFFFFFFFFFFFFFFFFFFFFFFFFFFFFFFFFFFFFFFFFFFFFFFFFFFF  
@A00155:342:HHGFNDSXY:1:2640:17644:29168 1:N:0:GAACCTAG+TCCGCATA  
TTCTCTCGGGCCACAGCCTTACAGCTGTGGAGCACGGTATCCTCTGCCGAAACAGAGGTTGGACAAG  
ACCGGAGGGGTCTCCTAGTTCCAAAGGAGATGTACTCCGGGCTTGTTACGACCTACCGTGTAAG  
+  
FFFFFFFFFFFFFFFFFFFFFFFFFFFFFFFFFFFFFFFFFFFFFFFFFFFFFFFFFFFFFFFFFFFFFFFFFFFFFFFF  
FFFFFFFFFFFFFFFFFFFFFFFFFFFFFFFFFFFFFFFFFFFFFFFFFFFFFFFFFFFFFFFFFFFFFFFFFFFFFFFF  
@A00155:342:HHGFNDSXY:1:2641:11107:2284 1:N:0:GAACCTAG+TCCGCATA  
GGGCGAGAGAGAGCGACTTCTCTCGGGCCACAGCCTTACAGCTGTGGAGCACGGTATCCTCTGCCGA  
AACAGAGGTTGGACAAGACCGGAGGGGTCTCCTGGTTCCAAAGGAGATGTACTCCGGGCTTGTTACG  
+  
FFFF:F:FFFFFFFF:F::FF,F:F:FFFFFFFF:FFF:FFFFFFFF,F:FFF::,FFFFFF,:FFF:FF  
FFF:,F:F:FFFFFFFFFFFF,,F::,F,FFFFFFFF,FF:,FFFF:FFF,FFFF,FFFFFFFFF:  
@A00155:342:HHGFNDSXY:1:2641:16071:18615 1:N:0:GAACCTAG+TCCGCATA  
CTTCTCTCGGGCCACAGCCTTACAGCTGTGGAGCACGGTATCCTCTGCCGAAACAGAGGTTGGACAA  
GACCGGAGGGGTCTCCTAGTTCCAAAGGAGATGTACTCCGGGCTTGTTACGACCTACCGTGTAAGTC  
+  
FFFFFFFFFFFFFFFFFFFFFFFFFFFFFFFFFFFFFFFFFFFFFFFFFFFFFFFFFFFFFFFFFFFFFFFFFFFFFFFF  
FFFFFF:FFFFFFFFFFFFFFFFFFFFFFFFFFFFFFFFFFFFFFFFFFFFFFFFFFFFFFFFFFFFFFFFFFFFFFFF  
@A00155:342:HHGFNDSXY:1:2641:21748:20243 1:N:0:GAACCTAG+TCCGCATA  
GAGAGCGACTTCTCTCGGGCCACAGCCTTACAGCTGTGGAGCACGGTATCCTCTGCCGAAACAGAGG  
TTGGACAAGACCGGAGGGGTCTCCTGGTTCCAAAGGAGATGTACTCCGGGCTTGTTACGACCTACCG  
+  
FFFFFFFFFFFFFFFFFFFFFFFFFFFFFFFFFFFFFFFFFFFFFFFFFFFFFFFFFFFFFFFFFFFFFFFFFFFFFFFF  
FFFFFFFFFFFFFFFFFFFFFFFFFFFFFFFFFFFFFFFFFFFFFFFFFFFFFFFFFFFFFFFFFFFFFFFFFFFFFFFF  
@A00155:342:HHGFNDSXY:1:2641:8151:29262 1:N:0:GAACCTAG+TCCGCATA  
GATGTGGAGGGCGAGAGAGAGCGACTTCTCTCGGGCCACAGCCTTACAGCTGTGGAGCACGGTATCC  
TCTGCCGAAACAGAGGTTGGACAAGACCGGAGGGGTCTCCTAGTTCCAAAGGAGATGTACTCCGGGCT  
+  
FFFFFFFFFFFFFFFFFFFFFFFFFFFFFFFFFFFFFFFFFFFFFFFFFFFFFFFFFFFFFFFFFFFFFFFFFFFFFFFF  
FF:FFFFFFFFFFFFFFFFFFFFFFFFFFFFFFFFFFFFFFFFFFFFFFFFFFFFFFFFFFFFFFFFFFFFFFFF:F:FFF  
FF:FFFFFFFFFFFFFFFFFFFFFFFFFFFFFFFFFFFFFFFFFFFFFFFFFFFFFFFFFFFFFFFFFFFFFFFF:FFFF::FFFF  
@A00155:342:HHGFNDSXY:1:2642:18783:8594 1:N:0:GAACCTAG+TCCGCATA  
ATCTCAATGCCGAGAGGGATGTGGAGGGCGAGAGAGAGCGACTTCTCTCGGGCCACAGCCTTACAGC

TGTGGAGCACGGTATCCTCTGCCGAAACAGAGGTTGGACAAGACCGGAGGGGTCTCCTAGTTCCAAAG  
+  
FFFFFFFFFFFF:FFFFFF:,FFFFFFFFFFFFFFFFFFFF:FFFFFFFFFFFFFFFFFFFFFFFF:FFFFFF  
FFFFFFFFFFFFFFFFFFFFFFFFFFFFFFFFFFFFFFFFFFFFFFFF:FFFFFFF:FFFF:FFFFFFFFFFFFFFFFFFFF:FF  
@A00155:342:HHGFNDSXY:1:2642:32560:27602 1:N:0:GAACCTAG+TCCGCATA  
ACTTCTCTCGGGCCACAGCCTTACAGCTGTGGAGCACGGTATCCTCTGCCGAAACAGAGGTTGGACA  
AGACCGGAGGGGTCTCCTAGTTCCAAAGGAGATGTACTCCGGGCTTGTTACGACCTACCGTGTAAGT  
+  
FFFFFFFFFFFFFFFFFFFFFFFFFFFFFFFFFFFFFFFFFFFFFFFFFFFFFFFFFFFFFFFFFFFFFFFF  
FFFFFFFFF,FFFFFFFFFFF:F,FFFFFFFFFFFFFFFFFFFFFFFFFFFFFFFFFFFFFFFFFFFFFFFF:FFF:FF  
@A00155:342:HHGFNDSXY:1:2642:32099:33223 1:N:0:GAACCTAG+TCCGCATA  
GAGCGACTTCTCTCGGGCCACAGCCTTACAGCTGTGGAGCACGGTATCCTCTGCCGAAACAGAGGTT  
GGACAAGACCGGAGGGGTCTCCTAGTTCCAAAGGAGATGTACTCCGGGCTTGTTACGACCTACCGTG  
+  
FFFFFFFFFFFFFFFFFFFFFFFFFFFFFFFFFFFFFFFFFFFFFFFFFFFFFFFFFFFFFFFFFFFFFFFF  
FFFFFFFFF:FFFFFFFFFFFFFFFFFFFFFFFFFFFFFFFFFFFFFFFFFFFFFFFFFFFFFFFFFFFFFFFF  
@A00155:342:HHGFNDSXY:1:2643:23665:24627 1:N:0:GAACCTAG+TCCGCATA  
GGGATGTAGAGGGCGAGAGAGAGCGACTTCTCTCGGGCCACAGCCTTACAGCTGTGGAGCACGGTAT  
CCTCTGCCGAAACAGAGGTTGGACAAGACCGGAGGGGTCTCCTAGTTCCAAAGGAGATGTACTCCGG  
+  
,:FF,F,F,F:,,F,F:F,F:FFFFFF,:F::F:,,:FFF:,,::,,:F,F:FFF:,,FF::F,:FF  
:FFFF,FF:FFF::F:F,FFFFFFFF:F:FFF:,F::FF,:F,FF:F::FFF,FFF:,,FFF,F,:  
@A00155:342:HHGFNDSXY:1:2643:12879:27774 1:N:0:GAACCTAG+TCCGCATA  
CTTCTCTCGGGCCACAGCCTTACAGCTGTGGAGCACGGTATCCTCTGCCGAAACAGAGGTTGGACAA  
GACCGGAGGGGTCTCCTAGTTCCAAAGGAGATGTACTCCGGGCTTGTTACGACCTACCGTGTA  
+  
FFFFFFFFFFFFFFFFFFFFFFFFFFFFFFFFFFFFFFFFFFFFFFFFFFFFFFFFFFFFFFFFFFFFFFFF  
FFFFFFFFFFFFFFFFFFFFFFFFFFFFFFFFFFFFFFFFFFFFFFFFFFFFFFFFFFFFFFFFFFFFFFFF  
@A00155:342:HHGFNDSXY:1:2644:14353:2644 1:N:0:GAACCTAG+TCCGCATA  
TCCTCTGCCGAAACAGAGGTTGGACAAGACCGGAGGGGTCTCCTAGTTCCAAAGGAGATGTACTCCGG  
GCTTGTTACGACCTACCGTGTAAGTCGTAGTCTAGTAGGCTACCTGACGAGTCCTTTTAG  
+  
FFFFFFFFFFFFFFFFFFFFFFFFFFFFFFFFFFFFFFFFFFFFFFFFFFFFFFFFFFFFFFFFFFFFFFFF  
FFFFFFFFFFFFFFFFFFFFFFFFFFFFFFFFFFFFFFFFFFFFFFFFFFFFFFFFFFFFFFFFFFFFFFFF  
@A00155:342:HHGFNDSXY:1:2644:13548:3317 1:N:0:GAACCTAG+TCCGCATA  
TCCTCTGCCGAAACAGAGGTTGGACAAGACCGGAGGGGTCTCCTAGTTCCAAAGGAGATGTACTCCGG  
GCTTGTTACGACCTACCGTGTAAGTCGTAGTCTAGTAGGCTACCTGACGAGTCCTTTTAG  
+  
FFFFFFFFFFFFFFFFFFFFFFFFFFFFFFFFFFFFFFFFFFFFFFFFFFFFFFFFFFFFFFFFFFFFFFFF  
FFFFFFFFFFFFFFFFFFFFFFFFFFFFFFFFFFFFFFFFFFFFFFFFFFFFFFFFFFFFFFFFFFFFFFFF  
@A00155:342:HHGFNDSXY:1:2645:4625:5024 1:N:0:GAACCTAG+TCCGCATA  
CTCAATGCCGAGAGGGATGTGGAGGGCGAGAGAGAGCGACTTCTCTCGGGCCACAGCCTTACAGCTG  
TGGAGCACGGTATCCTCTGCCGAAACAGAGGTTGGACAAGACCGGAGGGGTCTCCTGGTTCCAAAGGA  
+  
FFFFFFFFFFF:FFFFFFFFFFFFFFFFFFFFFFFFFFFFFFFFFFFFFFFFFFFFFFFFFFFFFFFFFFFF  
FFFFFFFFFFFFFFFFFFFFFFFFFFFFFFFFFFFFFFFFFFFFFFFFFFFFFFFFFFFFFFFFFFFFFFFF  
@A00155:342:HHGFNDSXY:1:2645:16116:8015 1:N:0:GAACCTAG+TCCGCATA  
ATGCCGAGAGGGATGTGGAGGGCGAGAGAGAGCGACTTCTCTCGGGCCACAGCCTTACAGCTGTGGA  
GCACGGTATCCTCTGCCGAAACAGAGGTTGGACAAGACCGGAGGGGTCTCCTAGTTCCAAAGGAGATG  
+  
FFFFFFFFFFFFFFFFFFFFFFFFFFFFFFFFFFFFFFFFFFFFFFFFFFFFFFFFFFFFFFFFFFFFFFFF  
FFFFFFFFFFFFFFFFFFFFFFFFFFFFFFFFFFFFFFFFFFFFFFFFFFFFFFFFFFFFFFFFFFFFFFFF  
@A00155:342:HHGFNDSXY:1:2645:26069:18020 1:N:0:GAACCTAG+TCCGCATA  
ATCTCAATGCCGAGAGGGATGTGGAGGGCGAGAGAGAGCGACTTCTCTCGGGCCACAGCCTTACAGC

TGTGGAGCACGGTATCCTCTGCCGAAACAGAGGTTGGACAAGACCGGAGGGGTCTCCTAGTTCCAAAG  
+  
FFFFFFFFFFFFFFFFFFFFFFFFFFFFFFFFFFFFFFFFFFFFFFFFFFFFFFFFFFFFFFFFFFFFFFFF:FFFFFFF  
FFFFFFFFFFFFFFFFFFFFFFFFFFFFFFFFFFFFFFFFFFFFFFFFFFFFFFFFFFFFFFFFFFFFFFFF:FFFFFFFFFFFFFFFFFFFFFFFF  
@A00155:342:HHGFNDSXY:1:2645:23610:24283 1:N:0:GAACCTAG+TCCGCATA  
AGAGAGAGCGACTTCTCTCGGGCCCACAGCCTTACAGCTGTGGAGCACGGTATCCTCTGCCGAAACAG  
AGGTTGGACAAGACCGGAGGGGTCTCCTAGTTCCAAAGGAGATGTAAGTCCGGGCTTGTTACAGACCTA  
+  
FFFFFFFFFFFFFFFFFFFFFFFFFFFFFFFFFFFFFFFFFFFFFFFFFFFFFFFFFFFFFFFFFFFFFFFF  
FFFFFFFFFFFFFFFFFFFFFFFFFFFFFFFFFFFFFFFFFFFFFFFFFFFFFFFFFFFFFFFFFFFFFFFF  
@A00155:342:HHGFNDSXY:1:2645:25825:25676 1:N:0:GAACCTAG+TCCGCATA  
GAGACCCCTCCGGTCTTGTTCCAACTCTGTTTCGGCAGAGGATACCGTGCTCCACAGCTGTAAGGCTG  
TGGGCCCCGAGAGAAGTCTCTCTCTCGCCCTCCACATCCCTCTCGGCATTGAGATGAC  
+  
FFFFFFFFFFFFFFFFFFFFFFFFFFFFFFFFFFFFFFFFFFFFFFFFFFFFFFFFFFFFFFFFFFFFFFFF  
FFFFFFFFFFFFFFFFFFFFFFFFFFFFFFFFFFFFFFFFFFFFFFFFFFFFFFFFFFFFFFFFFFFFFFFF  
@A00155:342:HHGFNDSXY:1:2646:31123:19351 1:N:0:GAACCTAG+TCCGCATA  
CTTCTCTCGGGCCCACAGCCTTACAGCTGTGGAGCACGGTATCCTCTGCCGAAACAGAGGTTGGACAA  
GACCGGAGGGGTCTCCTAGTTCCAAAGGAGATGTAAGTCCGGGCTTGTTACAGACCTACCGTGTAAGTC  
+  
FFFFFFFFFFFFFFFFFFFFFFFFFFFFFFFFFFFFFFFFFFFFFFFFFFFFFFFFFFFFFFFFFFFFFFFF  
FFFFFFFFFFFFFFFFFFFFFFFFFFFFFFFFFFFFFFFFFFFFFFFFFFFFFFFFFFFFFFFFFFFFFFFF:FFFF  
@A00155:342:HHGFNDSXY:1:2646:29948:24173 1:N:0:GAACCTAG+TCCGCATA  
ACCTCTGTTTCGGCAGAGGATACCGTGCTCCACAGCTGTAAGGCTGTGGGCCCCGAGAGAAGTCGCTCT  
CTCTCGCCCTCTACATCCCTCTCGGCATTGAGATGACCATAGGCCAGAGGTGAGTCCTTAAGTGACAA  
+  
FFFFFFFFFFFFFFFFFFFFFFFFFFFFFFFFFFFFFFFFFFFFFFFFFFFFFFFFFFFFFFFFFFFFFFFF:FFFFFFF  
FFFFFFFFFFFFFFFFFFFFFFFFFFFFFFFFFFFFFFFFFFFFFFFFFFFFFFFFFFFFFFFFFFFFFFFF:  
@A00155:342:HHGFNDSXY:1:2646:6804:32753 1:N:0:GAACCTAG+TCCGCATA  
CTCAATGCCGAGAGGGATGTGGAGGGCGAGAGAGAGCGACTTCTCTCGGGCCCACAGCCTTACAGCTG  
TGGAGCACGGTATCCTCTGCCGAAACAGAGGTTGGACAAGACCGGAGGGGTCTCCTAGTTCCAAAGGA  
+  
FFFFFFFFFFFFFFFFFFFF:FF:FFFFFFFFFFFFFFFFFFFFFFFFFFFFFFFFFFFFFFFFFFFFFFFF  
FFFFFFFFFFFFFFFFFFFFFFFFFFFFFFFFFFFFFFFFFFFFFFFFFFFFFFFFFFFFFFFFFFFFFFFF  
@A00155:342:HHGFNDSXY:1:2647:17228:11099 1:N:0:GAACCTAG+TCCGCATA  
TCCACTTAAGGACTCTCCTCTGGCCTATGGTCATCTCAATGCCGAGAGGGATGTGGAGGGCGAGAGAG  
AGCGACTTCTCTCGGGCCCACAGCCTTACAGCTGTGGAGCACGGTATCCTCTGCCGAAACAGAGGTTG  
+  
FFFFFFFFFFFFFFFFFFFFFFFFFFFFFFFFFFFFFFFFFFFFFFFFFFFFFFFFFFFFFFFFFFFFFFFF:FFFFFFF  
FFFFFFFFFFFFFFFFFFFFFFFFFFFFFFFFFFFFFFFFFFFFFFFFFFFFFFFFFFFFFFFFFFFFFFFF  
@A00155:342:HHGFNDSXY:1:2647:18701:13620 1:N:0:GAACCTAG+TCCGCATA  
GTCATCTCAATGCCGAGAGGGATGTGGAGGGCGAGAGAGAGCGACTTCTCTCGGGCCCACAGCCTTAC  
AGCTGTGGAGCACGGTATCCTCTGCCGAAACAGAGGTTGGACAAGACCGGAGGGGTCTCCTAGTTCCA  
+  
FFFFFFFFFFFFFFFFFFFFFFFFFFFFFFFFFFFFFFFFFFFFFFFFFFFFFFFFFFFFFFFFFFFFFFFF  
FFFFFFFFFFFFFFFFFFFFFFFFFFFFFFFFFFFFFFFFFFFFFFFFFFFFFFFFFFFFFFFFFFFFFFFF  
@A00155:342:HHGFNDSXY:1:2647:20193:20650 1:N:0:GAACCTAG+TCCGCATA  
CTGGCCTTTGGTCATCTCAATGCCGAGAGGGATGTGGAGGGCGAGAGAGAGCGACTTCTCTCGGGCCC  
ACAGCCTTACAGCTGTGGAGCACGGTATCCTCTGCCGAAACAGAGGTTGGACAAGACCGGAGGGGTCT  
+  
FFFFFFFFFFFFFFFFFFFFFFFFFFFFFFFFFFFFFFFFFFFFFFFFFFFFFFFFFFFFFFFFFFFFFFFF,  
FFFFFFFFFFFFFFFFFFFFFFFFFFFFFFFFFFFFFFFFFFFFFFFFFFFFFFFFFFFFFFFFFFFFFFFF  
@A00155:342:HHGFNDSXY:1:2647:11867:30749 1:N:0:GAACCTAG+TCCGCATA  
CACCTCTGGCCTATGGTCATCTCAATGCCGAGAGGGATGTGAAGGGCGAGAGAGAGCGACTTCTCTCG

GGCCACAGCCTTACAGCTGTGGAGCACGGTATCCTCTGCCGAAACAGAGGTTGGACAAGACCGGAGG  
+  
FFFFFFFFFFFFFF:FFFFFFFFFFFFFF:FFFFFFFFFFFFFF:FFFFFFFFFFFFFF:FFFFFFFFFFFFFF  
FFFFFFFFFFFFFF:FFFFFFFFFFFFFF:FFFFFFFFFFFFFF:FFFFFFFFFFFFFF:FFFFFFFFFFFFFF  
@A00155:342:HHGFNDSXY:1:2648:5692:3677 1:N:0:GAACCTAG+TCCGCATA  
AGGGATGTGGAGGGCGAGAGAGAGCGACTTCTCTCGGGCCCACAGCCTTACAGCTGTGGAGCACGGTA  
TCCTCTGCCGAAACAGAGGTTGGACAAGACCGGAGGGGTCTCCTAGTTCCAAAGGAGATGTACTCCGG  
+  
FFFFFFFFFFFFFF:FFFFFFFFFFFFFF:FFFFFFFFFFFFFF:FFFFFFFFFFFFFF:FFFFFFFFFFFFFF  
FFFFF:FFFFFFFFFFFFFF:FFFFFFFFFFFFFF:FFFFFFFFFFFFFF:FFFFFFFFFFFFFF:F  
@A00155:342:HHGFNDSXY:1:2648:31973:11459 1:N:0:GAACCTAG+TCCGCATA  
CTTCTCTCGGGCCCACAGCCTTACAGCTGTGGAGCACGGTATCCTCTGCCGAAACAGAGGTTGGACAA  
GACCGGAGGGGTCTCCTAGTTCCAAAGGAGATGTACTCCGGGCTTGTTACGACCTACCGTGTAAGTC  
+  
FFFFFFFFFFFFFF:FFFFFFFFFFFFFF:FFFFFFFFFFFFFF:FFFFFFFFFFFFFF:FFFFFFFFFFFFFF  
FFFFFFFFFFFFFF:FFFFFFFFFFFFFF:FFFFFFFFFFFFFF:FFFFFFFFFFFFFF:FFFFFFFFFFFFFF:FFF  
@A00155:342:HHGFNDSXY:1:2648:13313:17848 1:N:0:GAACCTAG+TCCGCATA  
CACCTCTGGCCTATGGTCATCTCAATGCCGAGAGGGATGTGAAGGGCGAGAGAGAGCGACTTCTCTCG  
GGCCACAGCCTTACAGCTGTGGAGCACGGTATCCTCTGCCGAAACAGAGGTTGGACAAGACCGGAGG  
+  
FFFFFFFFFFFFFF:FFFFFFFFFFFFFF:FFFFFFFFFFFFFF:FFFFFFFFFFFFFF:FFFFFFFFFFFFFF  
FFFFFFFFFFFFFF:FFFFFFFFF:FFFFFFFFFFFFFF:FFFFFFFFFFFFFF:FFFFFFFFFFFFFF:FFFF  
@A00155:342:HHGFNDSXY:1:2648:12409:27899 1:N:0:GAACCTAG+TCCGCATA  
GGGCGAGAGAGAGCGACTTCTCTCGGGCCCACAGCCTTACAGCTGTGGAGCACGGTATCCTCTGCCGA  
AACAGAGGTTGGACAAGACCGGAGGGGTCTCCTGGTTCCAAAGGAGATGTACTCCGGGCTTGTTACG  
+  
FFFFFFFFFFFFFF:FFFFFFFFFFFFFF:FFFFFFFFFFFFFF:FFFFFFFFFFFFFF:FFFFFFFFFFFFFF  
FFFFFFFFFFFFFF:FFFFFFFFFFFFFF:FFFFFFFFFFFFFF:FFFFFFFFFFFFFF:FFFFFFFFFFFFFF  
@A00155:342:HHGFNDSXY:1:2649:21296:1548 1:N:0:GAACCTAG+TCCGCATA  
AGGGATGTGGAGGGCGAGAGAGAGCGACTTCTCTCGGGCCCACAGCCTTACAGCTGTGGAGCACGGTA  
TCCTCTGCCGAAACAGAGGTTGGACAAGACCGGAGGGGTCTCCTGGTTCCAAAGGAGATGTACTCCGG  
+  
FFFFFFFFFFFFFF:FFFFFFFFFFFFFF:FFFFFFFFFFFFFF:FFFFFFFFFFFFFF:FFFFFFFFFFFFFF  
FFFFFFFFFFFFFF:FFFFFFFFFFFFFF:FFFFFFFFFFFFFF:FFFFFFFFFFFFFF:FFFFFFFFFFFFFF  
@A00155:342:HHGFNDSXY:1:2649:30355:13448 1:N:0:GAACCTAG+TCCGCATA  
ACTTCTCTCGGGCCCACAGCCTTACAGCTGTGGAGCACGGTATCCTCTGCCGAAACAGAGGTTGGACA  
AGACCGGAGGGGTCTCCTAGTTCCAAAGGAGATGTACTCCGGGCTTGTTACGACCTACCGTGTAAGT  
+  
FFFFFFFFFFFFFF:FFFF:FFFFFFFFFFFFFF:FFFFF  
FFFFFFFFFFFFFF:FFFFFFFFFFFFFF:FFFFFFFFFFFFFF:FFFFFFFFFFFFFF:FFFFFFFFFFFFFF  
@A00155:342:HHGFNDSXY:1:2649:8956:21762 1:N:0:GAACCTAG+TCCGCATA  
CTTCTCTCGGGCCCACAGCCTTACAGCTGTGGAGCACGGTATCCTCTGCCGAAACAGAGGTTGGACAA  
GACCGGAGGGGTCTCCTAGTTCCAAAGGAGATGTACTCCGGGCTTGTTTACGACCTACCGTGTAAGTC  
+  
FFFFFFFFFFFFFF:FFFFFFFFFFFFFF:FFFFFFFFFFFFFF:FFFFFFFFFFFFFF:FFFFFFFFFFFFFF  
FFFFFFFFFFFFFF:FFFFFFFFFFFFFF:FFFFFFFFFFFFFF:FFFFFFFFFFFFFF:FFFFFFFFFFFFFF  
@A00155:342:HHGFNDSXY:1:2649:32922:35399 1:N:0:GAACCTAG+TCCGCATA  
CTTCTCTCGGGCCCACAGCCTTACAGCTGTGGAGCACGGTATCCTCTGCCGAAACAGAGGTTGGACAA  
GACCGGAGGGGTCTCCTAGTTCCAAAGGAGATGTACTCCGGGCTTGTTACGACCTACCGTGTAAGTC  
+  
FFFFFFFFFFFFFF:F:FFFFFFFFFFFFFF:FFFFFFFFFFFFFF:FF:FFFFFFFFFFFFFF  
@A00155:342:HHGFNDSXY:1:2650:6777:18834 1:N:0:GAACCTAG+TCCGCATA  
TGTCCACTTAAGGACTCACCTCTGGCCTATGGTCATCTCAATGCCGAGAGGGATGTGAAGGGCGAGAG

AGAGCGACTTCTCTCGGGCCACAGCCTTACAGCTGTGGAGCACGGTATCCTCTGCCGAAACAGAGGT  
+  
FFFFFFFF:FFFFFFFFFFFFFFFFFFFFFFFFFFFFFFFFFFFFFFFFFFFFFFFFFFFFFFFFFFFFFFFF  
FF:FFFFFFFFFFFFFFFFFFFFFFFFFFFFFFFFFFFFFFFFFFFFFFFFFFFFFFFFFFFFFFFFFFFFFFFF  
@A00155:342:HHGFNDSXY:1:2650:15573:20478 1:N:0:GAACCTAG+TCCGCATA  
GAGAGAGCGACTTCTCTCGGGCCACAGCCTTACAGCTGTGGAGCACGGTATCCTCTGCCGAAACAGA  
GTTTGGACAAGACCGGAGGGGTCTCCTAGTTCCAAAGGAGATGTACTCCGGGCTTGTTACGACCTA  
+  
F:F:F,FFF,F:FFFFFFFFFFFFFFFFFFFFFFFFFFFFFFFFFFFFFFFFFFFFFFFFFFFFFFFFFFFFF,F:F:FF,FF::FFFF,:FFFF::F,  
F:F:FFFFFFFF::FFFFFFFFFFFFFFFFFFFFFFFFFFFFFFFFFFFFFFFFFFFFFFFFFFFFFFFFFFFFF,:F:,FFFF,:FFF,F:FFFF,:FFFF:FFF::FF:  
@A00155:342:HHGFNDSXY:1:2650:32606:21198 1:N:0:GAACCTAG+TCCGCATA  
AGGGATGTGGAGGGCGAGAGAGAGCGACTTCTCTCGGGCCACAGCCTTACAGCTGTGGAGCACGGTA  
TCCTCTGCCGAAACAGAGGTTGGACAAGACCGGAGGGGTCTCCTAGTTCCAAAGGAGATGTACTCCGG  
+  
FFFFFFFFFFFFFFFFFFFFFFFFFFFFFFFFFFFFFFFFFFFFFFFFFFFFFFFFFFFFFFFFFFFFFFFFFFFF  
FFFFFFFFFFFFFFFFFFFFFFFFFFFFFFFFFFFFFFFFFFFFFFFFFFFFFFFFFFFFFFFFFFFFFFFFFFFF  
@A00155:342:HHGFNDSXY:1:2650:12454:35963 1:N:0:GAACCTAG+TCCGCATA  
TTACAGCTGTGGAGCACGGTATCCTCTGCCGAAACAGAGGTTGGACAAGACCGGAGGGGTCTCCTAGT  
TCCAAAGGAGATGTACTCCGGGCTTGTTACGACCTACCGTGTAAGTCGTAGTCTAGTAGGCTACCTG  
+  
FFFFFFFFFFFFFFFFFFFFFFFFFFFFFFFFFFFFFFFFFFFFFFFFFFFFFFFFFFFFFFFFFFFFFFFFFFFF  
FFFFFFFFFFFFFFFFFFFFFFFFFFFFFFFFFFFFFFFFFFFFFFFFFFFFFFFFFFFFFFFFFFFFFFFFFFFF:FF  
@A00155:342:HHGFNDSXY:1:2651:10366:2534 1:N:0:GAACCTAG+TCCGCATA  
CTCAATGCCGAGAGGGATGTAGAGGGCGAGAGAGAGCGACTTCTCTCGGGCCACAGCCTTACAGCTG  
TGGAGCACGGTATCCTCTGCCGAAACAGAGGTTGGACAAGACCGGAGGGGTCTCCTAGTTCCAAAGGA  
+  
FFFFFFFFFFFFFFFFFFFFFFFFFFFFFFFFFFFFFFFFFFFFFFFFFFFFFFFFFFFFFFFFFFFFFFFFFFFF  
FFFFFFFFFFFFFFFFFFFFFFFFFFFFFFFFFFFFFFFFFFFFFFFFFFFFFFFFFFFFFFFFFFFFFFFFFFFF  
@A00155:342:HHGFNDSXY:1:2651:18322:27367 1:N:0:GAACCTAG+TCCGCATA  
TTAAGGACTCTCCTCTGGCCTATGGTCATCTCAATGCCGAGAGGGATGTGGAGGGCGAGAGAGAGCGA  
CTTCTCTCGGGCCACAGCCTTACAGCTGTGGAGCACGGTATCCTCTGCCGAAACAGAGGTTGGACAA  
+  
FFFFFFFFFFFFFFFFFFFFFFFFFFFFFFFFFFFFFFFFFFFFFFFFFFFFFFFFFFFFFFFFFFFFFFFFFFFF:FFFFFFFFFFFFFFFFFFFFFFFFFFFF  
FFFFFFFFFFFFFFFFFFFFFFFFFFFFFFFFFFFFFFFFFFFFFFFFFFFFFFFFFFFFFFFFFFFFFFFFFFFF,FFFFFFFF:FFFFFFFFFFFFFFFFFFFFFFFFFFFFFFFFFFFFFFFFFFFFFFFFFFFFFFFFFFFF:FFFFFF  
@A00155:342:HHGFNDSXY:1:2651:21920:34726 1:N:0:GAACCTAG+TCCGCATA  
TTAAAGACTCACCTCTGGCCTATGGTCATCTCAATGCCGAGAGGGATGTGGAGGGCGAGAGAGAGCGA  
CTTCTCTCGGGCCACAGCCTTACAGCTGTGGAGCACGGTATCCTCTGCCGAAACAGAGGTTGGACAA  
+  
FFFFFFFFFFFFFFFFFFFFFFFFFFFFFFFFFFFFFFFFFFFFFFFFFFFFFFFFFFFFFFFFFFFFFFFFFFFF,FFFFFFFFFFFFFFFFFFFFFFFFFFFFFFFFFFFFFFFFFFFFFFFFFFFFFFFFFFFFFFFFFFFF  
FFFF:FFFFFFFFFFFFFFFFFFFFFFFFFFFFFFFFFFFFFFFFFFFFFFFFFFFFFFFFFFFFFFFFFFFFFFFFFFFF:FFFFFFFFFFFFFFFFFFFFFFFFFFFFFFFFFFFFFFFFFFFFFFFFFFFFFFFFFFFFF  
@A00155:342:HHGFNDSXY:1:2652:8404:2832 1:N:0:GAACCTAG+TCCGCATA  
GTATCCTCTGCCGAAACAGAGGTTGGACAAGACCGGAGGGGTCTCCTAGTTCCAAAGGAGATGTACTC  
CGGGCTTGTTACGACCTACCGTGTAAGTCGTAGTCTAGTAGGCTACCTGACGAGTCCTTTTAGGAC  
+  
FFFFFFFFFFFF:FFFFFFFF:FFFFFFFFFFFFFFFFFFFFFFFFFFFFFFFFFFFFFFFFFFFFFFFFFFFFFFFFFFFF  
FFFFFFFFFFFFFFFFFFFFFFFFFFFFFFFFFFFFFFFFFFFFFFFFFFFFFFFFFFFFFFFFFFFFFFFFFFFF:FFFFFFFFFFFFFFFFFFFFFFFFFFFFFFFFFFFFFFFFFFFFFFFFFFFFFFFFFFFFF  
@A00155:342:HHGFNDSXY:1:2652:9100:5509 1:N:0:GAACCTAG+TCCGCATA  
TTCTCTCGGGCCACAGCCTTACAGCTGTGGAGCACGGTATCCTCTGCCGAAACAGAGGTTGGACAAG  
ACCGGAGGGGTCTCCTAGTTCCAAAGGAGATGTACTCCGGGCTTGTTACGACCTACCGTGTAAGTCG  
+  
FFFFFFFFFFFFFFFFFFFFFFFFFFFFFFFFFFFFFFFFFFFFFFFFFFFFFFFFFFFFFFFFFFFFFFFFFFFF  
FFFFFFFFFFFFFFFFFFFFFFFFFFFFFFFFFFFFFFFFFFFFFFFFFFFFFFFFFFFFFFFFFFFFFFFFFFFF:FFFFFFFFFFFFFFFFFFFFFFFFFFFFFFFFFFFFFFFFFFFFFFFFFFFFFFFFFFFFF  
@A00155:342:HHGFNDSXY:1:2652:18267:16470 1:N:0:GAACCTAG+TCCGCATA  
GAGAGGGATGTAGAGGGCGAGAGAGAGCGACTTCTCTCGGGCCACAGCCTTACAGCTGTGGAGCACG

GTATCCTCTGCCGAAACAGAGGTTGGACAAGACCGGAGGGGTCTCCTAGTTCCAAAGGAGATGTACTC  
+  
FFFFFFFFFFFFFFFFFFFFFFFFFFFFFFFFFFFFFFFFFFFFFFFFFFFFFFFFFFFFFFFFFFFFFFFF  
FFFFFFFFFFFFFFFFFFFFFFFFFFFFFFFFFFFFFFFFFFFFFFFFFFFFFFFFFFFFFFFFFFFFFFFF  
@A00155:342:HHGFNDSXY:1:2652:8648:27085 1:N:0:GAACCTAG+TCCGCATA  
CATAGGCCAGAGGTGAGTCCTTAAGTGGACACAGCTGATCTAAGGCGGTGTGGCGGGGCATGGGTTTG  
AACCCCATGACGGTCGGAGTCTAGTAGGCTCCCTGATGAGTCCGTTCCAAGGACGAAAC  
+  
FFFFFFFFFFFFFFFFFFFFFFFFFFFFFFFFFFFFFFFFFFFFFFFFFFFFFFFFFFFFFFFFFFFFFFFF  
FFFFFFFFFFFFFFFFFFFFFFFFFFFFFFFFFFFFFFFFFFFFFFFFFFFFFFFFFFFFFFFFFFFFFFFF  
@A00155:342:HHGFNDSXY:1:2652:22236:29168 1:N:0:GAACCTAG+TCCGCATA  
AGAGAGAGCGACTTCTCTCGGGCCACAGCCTTACAGCTGTGGAGCACGGTATCCTCTGCCGAAACAG  
AGGTTGGACAAGACCGGAGGGGTCTCCTGGTTCCAAAGGAGATGTACTCCGGGCTTGTTACACGAC  
+  
FFFFFFFFFFFFFFFFFFFFFFFFFFFFFFFFFFFFFFFFFFFFFFFFFFFFFFFFFFFFFFFFFFFFFFFF  
FFFFFFFFFFFFFFFFFFFFFFFFFFFFFFFFFFFFFFFFFFFFFFFFFFFFFFFFFFFFFFFFFFFFFFFF  
@A00155:342:HHGFNDSXY:1:2653:22083:3630 1:N:0:GAACCTAG+TCCGCATA  
AGAGAGAGCGACTTCTCTCGGGCCACAGCCTTACAGCTGTGGAGCACGGTATCCTCTGCCGAAACAG  
AGGTTGGACAAGACCGGAGGGGTCTCCTAGTTCCAAAGGAGATGTACTCCGGGCTTGTTACACGACCTA  
+  
FFFFFFFFFFFFFFFFFFFFFFFFFFFFFFFFFFFFFFFFFFFFFFFFFFFFFFFFFFFFFFFFFFFFFFFF  
FFFFFFFFFFFFFFFFFFFFFFFFFFFFFFFFFFFFFFFFFFFFFFFFFFFFFFFFFFFFFFFFFFFFFFFF  
@A00155:342:HHGFNDSXY:1:2653:31295:17487 1:N:0:GAACCTAG+TCCGCATA  
CTCAATGCCGAGAGGGATGTGGAGGGCGAGAGAGAGCGACTTCTCTCGGGCCACAGCCTTACAGCTG  
TGGAGCACGGTATCCTCTGCCGAAACAGAGGTTGGACAAGACCGGAGGGGTCTCCTAGTTCCAAAGGA  
+  
FFFFFFFFFFFFFFFFFFFFFFFFFFFFFFFFFFFFFFFFFFFFFFFFFFFFFFFFFFFFFFFFFFFFFFFF  
FFFFFFFFFFFFFFFFFFFFFFFFFFFFFFFFFFFFFFFFFFFFFFFFFFFFFFFFFFFFFFFFFFFFFFFF:  
@A00155:342:HHGFNDSXY:1:2653:23176:20995 1:N:0:GAACCTAG+TCCGCATA  
TGCCGAGAGGGATGTGGAGGGCGAGAGAGAGCGACTTCTCTCGGGCCACAGCCTTACAGCTGTGGAG  
CACGGTATCCTCTGCCGAAACAGAGGTTGGACAAGACCGGAGGGGTCTCCTGGTTCCAAAGGAGAT  
+  
FFFFFFFFFFFFFFFFFFFFFFFFFFFFFFFFFFFFFFFFFFFFFFFFFFFFFFFFFFFFFFFFFFFFFFFF  
FFFFFFFFFFFFFFFFFFFFFFFFFFFFFFFFFFFFFFFFFFFFFFFFFFFFFFFFFFFFFFFFFFFFFFFF:  
@A00155:342:HHGFNDSXY:1:2654:7789:2801 1:N:0:GAACCTAG+TCCGCATA  
CTCAATGCCGAGAGGGATGTAGAGGGCGAGAGAGAGCGACTTCTCTCGGGCCACAGCCTTACAGCTG  
TGGAGCACGGTATCCTCTGCCGAAACAGAGGTTGGACAAGACCGGAGGGGTCTCCTAGTTCCAAAGGA  
+  
FFFFFFFFFFFFFFFFFFFFFFFFFFFFFFFFFFFFFFFFFFFFFFFFFFFFFFFFFFFFFFFFFFFFFFFF  
FFFFFFFFFFFFFFFFFFFFFFFFFFFFFFFFFFFFFFFFFFFFFFFFFFFFFFFFFFFFFFFFFFFFFFFF  
@A00155:342:HHGFNDSXY:1:2654:21965:20807 1:N:0:GAACCTAG+TCCGCATA  
CTTCTCTCGGGCCACAGCCTTACAGCTGTGGAGCACGGTATCCTCTGCCGAAACAGAGGTTGGACAA  
GACCGGAGGGGTCTCCTAGTTCCAAAGGAGATGTACTCCGGGCTTGTTACACGACCTACCGTGTAAGTC  
+  
FFFFFFFFFFFFFFFFFFFFFFFFFFFFFFFFFFFFFFFFFFFFFFFFFFFFFFFFFFFFFFFFFFFFFFFF  
FFFFFFFFFFFFFFFFFFFFFFFFFFFFFFFFFFFFFFFFFFFFFFFFFFFFFFFFFFFFFFFFFFFFFFFF  
@A00155:342:HHGFNDSXY:1:2654:12057:30107 1:N:0:GAACCTAG+TCCGCATA  
TGCCGAGAGGGATGTGGAGGGCGAGAGAGAGCGACTTCTCTCGGGCCACAGCCTTACAGCTGTGGAG  
CACGGTATCCTCTGCCGAAACAGAGGTTGGACAAGACCGGAGGGGTCTCCTAGTTCCAAAGGAGATGT  
+  
FFFFFFFFFFFFFFFFFFFFFFFFFFFFFFFFFFFFFFFFFFFFFFFFFFFFFFFFFFFFFFFFFFFFFFFF  
FFFFFFFFFFFFFFFFFFFFFFFFFFFFFFFFFFFFFFFFFFFFFFFFFFFFFFFFFFFFFFFFFFFFFFFF:  
@A00155:342:HHGFNDSXY:1:2654:10719:30232 1:N:0:GAACCTAG+TCCGCATA  
TGCCGAGAGGGATGTGGAGGGCGAGAGAGAGCGACTTCTCTCGGGCCACAGCCTTACAGCTGTGGAG



CACGGTATCCTCTGCCGAAACAGAGGTTGGACAAGACCGGAGGGGTCTCCTAGTTCCAAAGGAGATGT  
+  
FFFFFFFFFFFFFF:FFFFFFFFFFFFFFFFFFFFFFFFFFFFFFFFFFFFFFFFFFFFFFFFFFFFFFFF  
FFFFFFFFFFFFFFFFFFFFFFFFFFFFFFFFFFFFFFFFFFFFFFFFFFFFFFFFFFFFFFFFFFFFFFFF  
@A00155:342:HHGFNDSXY:1:2655:11885:2910 1:N:0:GAACCTAG+TCCGCATA  
TGCCGAGAGGGATGTGGAGGGCGAGAGAGAGCGACTTCTCTCGGGCCACAGCCTTACAGCTGTGGAG  
CACGGTATCCTCTGCCGAAACAGAGGTTGGACAAGACCGGAGGGGTCTCCTAGTTCCAAAGGAGATGT  
+  
FFF:FFFFFFFFFFFFFFFFFFFFFFFFFFFFFFFFFFFFFFFFFFFFFFFFFFFFFFFFFFFFFFFF:FFFFFFF  
FFFFFFFFFFFFFFFFFFFFFFFFFFFFFFFFFFFFFFFFFFFFFFFFFFFFFFFFFFFFFFFFFFFFFFFF  
@A00155:342:HHGFNDSXY:1:2655:7627:6339 1:N:0:GAACCTAG+TCCGCATA  
ATCTCAATGCCGAGAGGGATGTGGAGGGCGAGAGAGAGCGACTTCTCTCGGGCCACAGCCTTACAGC  
TGTGGAGCACGGTATCCTCTGCCGAAACAGAGGTTGGACAAGACCGGAGGGGTCTCCTAGTTCCAAAG  
+  
FFFFFFFFFFFFFFFFFFFFFFFFFFFFFFFFFFFFFFFFFFFFFFFFFFFFFFFFFFFFFFFFFFFFFFFF:FFFF  
FFFFFFFFFFFFFFFFFFFFFFFFFFFFFFFFFFFFFFFFFFFFFFFFFFFFFFFFFFFFFFFFFFFFFFFF  
@A00155:342:HHGFNDSXY:1:2655:30011:15953 1:N:0:GAACCTAG+TCCGCATA  
GAGAGGGATGTAGAGGGCGAGAGAGAGCGACTTCTCTCGGGCCACAGCCTTACAGCTGTGGAGCACG  
GTATCCTCTGCCGAAACAGAGGTTGGACAAGACCGGAGGGGTCTCCTAGTTCCAAAGGAGATGTACTC  
+  
FFFFFFFFFFF:FFFFFFFFFFFFFFFFFFFFFFFFFFFFFFFFFFFFFFFFFFFFFFFFFFFFFFFFFFFF:FFFF  
FF:FFFFFFFFFFFFFFFFFFFF:FF:FFFFFFFF:FFFFFFFFFFFFFFFFFFFFFFFFFFFFFFFFFFFF:FFFF:FFFFF  
@A00155:342:HHGFNDSXY:1:2655:16703:27696 1:N:0:GAACCTAG+TCCGCATA  
GGGCGAGAGAGAGCGACTTCTCTCGGGCCACAGCCTTACAGCTGTGGAGCACGGTATCCTCTGCCGA  
AACAGAGGTTGGACAAGACCGGAGGGGTCTCCTAGTTCCAAAGGAGATGTACTCCGGGCTTGTTACG  
+  
FFFFFFFFFFFFFFFFFFFFFFFFFFFFFFFFFFFFFFFFFFFFFFFFFFFFFFFFFFFFFFFFFFFFFFFF:FFFFFFFFFFFFFFFFFFFFFFFFFFFFFFFF  
FFFFFFFFFFFFFFFFFFFFFFFFFFFFFFFFFFFFFFFFFFFFFFFFFFFFFFFFFFFFFFFFFFFFFFFF  
@A00155:342:HHGFNDSXY:1:2655:15682:35196 1:N:0:GAACCTAG+TCCGCATA  
TGTTTCGGCAGAGGATACCGTGCTCCACAGCTGTAAGGCTGTGGGCCCCGAGAGAAAGTCGCTCTCTCTC  
GCCCTTACATCCCTCTCGGCATTGAGATGACCATAGGCCAGAGGTGAGTCCTTAAGTGGACACAGCT  
+  
FFFFFFFFFFFFFFFFFFFFFFFFFFFFFFFFFFFFFFFFFFFFFFFFFFFFFFFFFFFFFFFFFFFFFFFFFFFFFFFFFFFFFFFFFFFFFFFFFFFFFFFF  
FFFFFFFFFFFFFFFFFFFFFFFFFFFFFFFFFFFFFFFFFFFFFFFFFFFFFFFFFFFFFFFFFFFFFFFF  
@A00155:342:HHGFNDSXY:1:2656:10755:11725 1:N:0:GAACCTAG+TCCGCATA  
GGATGTAGAGGGCGAGAGAGAGCGACTTCTCTCGGGCCACAGCCTTACAGCTGTGGAGCACGGTATC  
CTCTGCCGAAACAGAGGTTGGACAAGACCGGAGGGGTCTCCTAGTTCCAAAGGAGATGTACTCC  
+  
:FFFFFFFF, :FF, FFFFF:FFFF:FF:FFFF:FFFFFFFF:FF, FFFFF:FF, FF, FFFFFFFFF  
F, FFFFF:FFFFFFFF, FF, FF, FFFFF:FFFF: :FFFFFFFF:FFFFF: , :FFFFFFFF  
@A00155:342:HHGFNDSXY:1:2656:12979:11851 1:N:0:GAACCTAG+TCCGCATA  
TTCTCTCGGGCCACAGCCTTACAGCTGTGGAGCACGGTATCCTCTGCCGAAACAGAGGTTGGACAAG  
ACCGGAGGGGTCTCCTAGTTCCAAAGGAGATGTACTCCGGGCTTGTTACGACCTACCGTGTAAGTCG  
+  
FFFFFFFFFFFFFFFFFFFFFFFFFFFFFFFFFFFFFFFFFFFFFFFFFFFFFFFFFFFFFFFFFFFFFFFF  
FFFFFFFFFFFFFFFFFFFFFFFFFFFFFFFFFFFFFFFFFFFFFFFFFFFFFFFFFFFFFFFFFFFFFFFF  
@A00155:342:HHGFNDSXY:1:2656:9860:12774 1:N:0:GAACCTAG+TCCGCATA  
GAGGGCGAGAGAGAGCGACTTCTCTCGGGCCACAGCCTTACAGCTGTGGAGCACGGTATCCTCTGCC  
GAAACAGAGGTTGGACAAGACCGGAGGGGTCTCCTAGTTCCAAAGGAGATGTACTCCGGGCTTGTTCA  
+  
FFFFFFFFFFFFFFFFFFFFFFFFFFFFFFFFFFFFFFFFFFFFFFFFFFFFFFFFFFFFFFFFFFFFFFFF  
FFFFFFFFFFFFFFFFFFFFFFFFFFFFFFFFFFFFFFFFFFFFFFFFFFFFFFFFFFFFFFFFFFFFFFFF  
@A00155:342:HHGFNDSXY:1:2656:25093:20870 1:N:0:GAACCTAG+TCCGCATA  
ATCTCAATGCCGAGAGGGATGTGGAGGGCGAGAGAGAGCGACTTCTCTCGGGCCACAGCCTTACAGC

TGTGGAGCACGGTATCCTCTGCCGAAACAGAGGTTGGACAAGACCGGAGGGGTCTCCTAGTTCCAAAG  
+  
FFFFFFFFFFFFFFFFFFFFFFFFFFFFFFFFFFFFFFFFFFFFFFFFFFFFFFFFFFFFFFFFFFFFFFFF  
FFFFFFFFFFFFFFFFFFFFFFFFFFFFFFFFFFFFFFFFFFFFFFFFFFFFFFFFFFFFFFFFFFFFFFFF  
@A00155:342:HHGFNDSXY:1:2656:22182:25880 1:N:0:GAACCTAG+TCCGCATA  
TATCCTCTGCCGAAACAGAGGTTGGACAAGACCGGAGGGGTCTCCTGGTTCCAAAGGAGATGTACTCC  
GGGCTTGTTACGACCTACCGTGTAAGTCGTAGTCTAGTAGGCTACCTGACGAGTCCTTTTTAGGACG  
+  
FFFFFFFFFFFFFFFFFFFFFFFFFFFFFFFFFFFFFFFFFFFFFFFFFFFFFFFFFFFFFFFFFFFFFFFF  
FFFFFFFFFFFFFFFFFFFFFFFFFFFFFFFFFFFFFFFFFFFFFFFFFFFFFFFFFFFFFFFFFFFFFFFF:FFF  
@A00155:342:HHGFNDSXY:1:2656:4761:33974 1:N:0:GAACCTAG+TCCGCATA  
AGAGAGAGCGACTTCTCTCGGGCCACAGCCTTACAGCTGTGGAGCACGGTATCCTCTGCCGAAACAG  
AGGTTGGACAAGACCGGAGGGGTCTCCTGGTTCCAAAGGAGATGTACTCCGGGCTTGTTACGACCTA  
+  
FFFFFFFFFFFFFFFFFFFFFFFFFFFFFFFFFFFFFFFFFFFFFFFFFFFFFFFFFFFFFFFFFFFFFFFF:FFFFFFFF  
FFFFFFFFFFFFFFFFFFFFFFFFFFFFFFFFFFFFFFFFFFFFFFFFFFFFFFFFFFFFFFFFFFFFFFFF:FFFFFFFF  
@A00155:342:HHGFNDSXY:1:2657:19379:4523 1:N:0:GAACCTAG+TCCGCATA  
CGAGAGAGAGCGACTTCTCTCGGGCCACAGCCTTACAGCTGTGGAGCACGGTATCCTCTGCCGAAAC  
AGAGGTTGGACAAGACCGGAGGGGTCTCCTGGTTCCAAAGGAGATGTACTCCGGGCTTGTTACGACC  
+  
FFFFFFFFFFFFFFFFFFFFFFFFFFFFFFFFFFFFFFFFFFFFFFFFFFFFFFFFFFFFFFFFFFFFFFFF:FFFFFFFF  
FFFFFFFFFFFFFFFFFFFFFFFFFFFFFFFFFFFFFFFFFFFFFFFFFFFFFFFFFFFFFFFFFFFFFFFF:FFFFFFFF  
@A00155:342:HHGFNDSXY:1:2657:18005:11005 1:N:0:GAACCTAG+TCCGCATA  
TGCCGAGAGGGATGTGGAGGGCGAGAGAGAGCGACTTCTCTCGGGCCACAGCCTTACAGCTGTGGAG  
CACGGTATCCTCTGCCGAAACAGAGGTTGGACAAGACCGGAGGGGTCTCCTGGTTCCAAAGGAGATGT  
+  
FFFFFFFFFFFFFFFFFFFFFFFFFFFFFFFFFFFFFFFFFFFFFFFFFFFFFFFFFFFFFFFFFFFFFFFF:FFFFFFFF  
FFFFFFFFFFFFFFFFFFFFFFFFFFFFFFFFFFFFFFFFFFFFFFFFFFFFFFFFFFFFFFFFFFFFFFFF:F:FFFFFFFF  
@A00155:342:HHGFNDSXY:1:2657:6668:13448 1:N:0:GAACCTAG+TCCGCATA  
ACCTCTGTTTCGGCAGAGGATACCGTGCTCCACAGCTGTAAGGCTGTGGGCCCGAGAGAAGTCGCTCT  
CTCTCGCCCTCTACATCCCTCTCGGCATTGAGATGACCATAGGCCAGAGGTGAGTCCTTAAG  
+  
FFFFFFFFFFFFFFFFFFFFFFFFFFFFFFFFFFFFFFFFFFFFFFFFFFFFFFFFFFFFFFFFFFFFFFFF  
FFFFFFFFFFFFFFFFFFFFFFFFFFFFFFFFFFFFFFFFFFFFFFFFFFFFFFFFFFFFFFFFFFFFFFFF:  
@A00155:342:HHGFNDSXY:1:2657:12364:29324 1:N:0:GAACCTAG+TCCGCATA  
CGAGAGGGATGTAGAGGGCGAGAGAGAGCGACTTCTCTCGGGCCACAGCCTTACAGCTGTGGAGCAC  
GGTATCCTCTGCCGAAACAGAGGTTGGACAAGACCGGAGGGGTCTCCTAGTTCCAAAGGAGATGTACT  
+  
FFFFFFFFFFFFFFFFFFFFFFFFFFFFFFFFFFFFFFFFFFFFFFFFFFFFFFFFFFFFFFFFFFFFFFFF  
FFFFFFFFFFFFFFFFFFFFFFFFFFFFFFFFFFFFFFFFFFFFFFFFFFFFFFFFFFFFFFFFFFFFFFFF  
@A00155:342:HHGFNDSXY:1:2658:31467:11835 1:N:0:GAACCTAG+TCCGCATA  
ACCTCTGTTTCGGCAGAGGATACCGTGCTCCACAGCTGTAAGGCTGTGGGCCCGAGAGAAGTCGCTCT  
CTCTCGCCCTTACATCCCTCTCGGCATTGAGATGACCATAGGCCAGAGGTGAGTCCTTAAGTGGAC  
+  
FFFFFFFFFFFFFFFFFFFFFFFFFFFFFFFFFFFFFFFFFFFFFFFFFFFFFFFFFFFFFFFFFFFFFFFF:FFFFFFFF  
FFFFFFFFFFFFFFFFFFFFFFFFFFFFFFFFFFFFFFFFFFFFFFFFFFFFFFFFFFFFFFFFFFFFFFFF:FFFFFFFF  
@A00155:342:HHGFNDSXY:1:2658:30906:13839 1:N:0:GAACCTAG+TCCGCATA  
GATCAGCTGTGTCCACTTAAGGACTCACCTCTGGCCTATGGTCATCTCAATGCCGAGAGGGATGTGAA  
GGGCGAGAGAGAGCGACTTCTCTCGGGCCACAGCCTTACAGCTGTGGAGCACGGTATCCTCTGCCGA  
+  
FFFFFFFFFFFFFFFFFFFFFFFFFFFFFFFFFFFFFFFFFFFFFFFFFFFFFFFFFFFFFFFFFFFFFFFF:FFFFFFFF  
FFFFFFFFFFFFFFFFFFFFFFFFFFFFFFFFFFFFFFFFFFFFFFFFFFFFFFFFFFFFFFFFFFFFFFFF:FFFFFFFF  
@A00155:342:HHGFNDSXY:1:2658:26946:29183 1:N:0:GAACCTAG+TCCGCATA  
AATGCCGAGAGGGATGTGGAGGGCGAGAGAGAGCGACTTCTCTCGGGCCACAGCCTTACAGCTGTGG

AGCACGGTATCCTCTGCCGAAACAGAGGTTGGACAAGACCGGAGGGGTCTCCTAGTTCCAAAGGAGAT  
+  
FFFFFFFFFFFFFFFFFFFFFFFFFFFFFFFFFFFFFFFFFFFFFFFFFFFFFFFFFFFFFFFFFFFFFFFF  
FFFFFFFFFFFFFFFFFFFFFFFFFFFFFFFFFFFFFFFFFFFFFFFFFFFFFFFFFFFFFFFFFFFFFFFF  
@A00155:342:HHGFNDSXY:1:2658:19199:31297 1:N:0:GAACCTAG+TCCGCATA  
CGAGAGGGATGTAGAGGGCGAGAGAGAGCGACTTCTCTCGGGCCCACAGCCTTACAGCTGTGGAGCAC  
GGTATCCTCTGCCGAAACAGAGGTTGGACAAGACCGGAGGGGTCTCCTAGTTCCAAAGGAGATGTACT  
+  
FF:FFFFFFFF:FFFFFFFFFFFFFFFFFFFFFFFFFFFFFFFFFFFFFFFFFFFFFFFFFFFFFFFFFFFF  
FFFFFFFFFFFFFFFFFFFFFFFFFFFFFFFFFFFFFFFFFFFFFFFFFFFFFFFFFFFFFFFFFFFFFFFF  
@A00155:342:HHGFNDSXY:1:2659:21522:7921 1:N:0:GAACCTAG+TCCGCATA  
TCTGTTTCGGCAGAGGATACCGTGCTCCACAGCTGTAAGGCTGTGGGCCCCGAGAGAAGTCGCTCTCTC  
TCGCCCTCTACATCCCTCTCGGCATTGAGATGACCATAGGCCAGAGGTGAGTCCTTAAGTGGACACAG  
+  
FFFFFFFFFFFFFFF,FFFFFFFFFFFFFFFFFFFFFFFFFFFFFFFFFFFFFFFFFFFFFFFFFFFFFFFF  
FFFFFFFFFFFFFFFFFFFFFFFFFFFFFFFFFFFFFFFFFFFFFFFFFFFFFFFFFFFFFFFFFFFFFFFF  
@A00155:342:HHGFNDSXY:1:2659:1976:18505 1:N:0:GAACCTAG+TCCGCATA  
GGGCGAGAGAGAGCGACTTCTCTCGGGCCCACAGCCTTACAGCTGTGGAGCACGGTATCCTCTGCCGA  
AACAGAGGTTGGACAAGACCGGAGGGGTCTCCTAGTTCCAAAGGAGATGTACTCCGGGCTTGTTACG  
+  
FFFFFFFFFFFFFFFFFFFFFFFFFFFFFFFFFFFFFFFFFFFFFFFFFFFFFFFFFFFFFFFFFFFFFFFF  
FFFFFFFFFFFFFFFFFFFFFFFFFFFFFFFFFFFFFFFFFFFFFFFFFFFFFFFFFFFFFFFFFFFFFFFF  
@A00155:342:HHGFNDSXY:1:2659:22742:28855 1:N:0:GAACCTAG+TCCGCATA  
AGAGAGAGCGACTTCTCTCGGGCCCACAGCCTTACAGCTGTGGAGCACGGTATCCTCTGCCGAAACAG  
AGGTTGGACAAGACCGGAGGGGTCTCCTAGTTCCAAAGGAGATGTACTCCGGGCTTGTTACGACCTA  
+  
FFFFFFFFFFFFFFFFFFFFFFFFFFFFFFFFFFFFFFFFFFFFFFFFFFFFFFFFFFFFFFFFFFFFFFFF  
FFFFFFFFFFFFFFFFFFFFFFFFFFFFFFFFFFFFFFFFFFFFFFFFFFFFFFFFFFFFFFFFFFFFFFFF  
@A00155:342:HHGFNDSXY:1:2659:4869:31469 1:N:0:GAACCTAG+TCCGCATA  
GAGCGACTTCTCTCGGGCCCACAGCCTTACAGCTGTGGAGCACGGTATCCTCTGCCGAAACAGAGGTT  
GGACAAGACCGGAGGGGTCTCCTAGTTCCAAAGGAGATGTACTCCGGGCTTGTTACGACCTACCGTG  
+  
FFFFFFFFFFFFFFFFFFFFFFFFFFFFFFFFFFFFFFFFFFFFFFFFFFFFFFFFFFFFFFFFFFFFFFFF  
FFFFFFFFFFFFFFFFFFFFFFFFFFFFFFFFFFFFFFFFFFFFFFFFFFFFFFFFFFFFFFFFFFFFFFFF  
@A00155:342:HHGFNDSXY:1:2659:31403:35712 1:N:0:GAACCTAG+TCCGCATA  
CTTCTCTCGGGCCCACAGCCTTACAGCTGTGGAGCACGGTATCCTCTGCCGAAACAGAGGTTGGACAA  
GACCGGAGGGGTCTCCTGGTTCCAAAGGAGATGTACTCCGGGCTTGTTACGACCTACCGTGTAAGTC  
+  
FFFFFFFFFFFFFFFFFFFFFFFFFFFFFFFFFFFFFFFFFFFFFFFFFFFFFFFFFFFFFFFFFFFFFFFF  
FFFFFFFFFFFFFFFFFFFFFFFFFFFFFFFFFFFFFFFFFFFFFFFFFFFFFFFFFFFFFFFFFFFFFFFF  
@A00155:342:HHGFNDSXY:1:2659:31855:36746 1:N:0:GAACCTAG+TCCGCATA  
CTTCTCTCGGGCCCACAGCCTTACAGCTGTGGAGCACGGTATCCTCTGCCGAAACAGAGGTTGGACAA  
GACCGGAGGGGTCTCCTGGTTCCAAAGGAGATGTACTCCGGGCTTGTTACGACCTACCGTGTAAGTC  
+  
FFFFFFFFFFFFFFFFFFFFFFFFFFFFFFFFFFFFFFFFFFFFFFFFFFFFFFFFFFFFFFFFFFFFFFFF  
FFFFFFFFFFFFFFFFFFFFFFFFFFFFFFFFFFFFFFFFFFFFFFFFFFFFFFFFFFFFFFFFFFFFFFFF  
@A00155:342:HHGFNDSXY:1:2660:2537:13964 1:N:0:GAACCTAG+TCCGCATA  
ATCTCAATGCCGAGAGGGATGTGGAGGGCGAGAGAGAGCGACTTCTCTCGGGCCCACAGCCTTACAGC  
TGTGGAGCACGGTATCCTCTGCCGAAACAGAGGTTGGACAAGACCGGAGGGGTCTCCTAGTTCCAAAG  
+  
FFFFFFFFFFFFFFFFFFFFFFFFFFFFFFFFFFFFFFFFFFFFFFFFFFFFFFFFFFFFFFFFFFFFFFFF  
F:FFFFFFFFFFFFFFFFFFFFFFFFFFFFFFFFFFFFFFFFFFFFFFFFFFFFFFFFFFFFFFFFFFFF  
@A00155:342:HHGFNDSXY:1:2660:26567:14184 1:N:0:GAACCTAG+TCCGCATA  
CTCAATGCCGAGAGGGATGTGGAGGGCGAGAGAGAGCGACTTCTCTCGGGCCCACAGCCTTACAGCTG

TGGAGCACGGTATCCTCTGCCGAAACAGAGGTTGGACAAGACCGGAGGGGTCTCCTAGTTCCAAAGGA  
+  
FFFFFFFFFFFFFFFFFFFFFFFFFFFFFFFFFFFFFFFFFFFFFFFFFFFFFFFFFFFFFFFFFFFFFFFFFFFFFFFF  
FFFFFFFFFFFFFFFFFFFFFFFFFFFFFFFFFFFFFFFFFFFFFFFFFFFFFFFFFFFFFFFFFFFFFFFFFFFFFFFF  
@A00155:342:HHGFNDSXY:1:2660:18385:17644 1:N:0:GAACCTAG+TCCGCATA  
GAGCGACTTCTCTCGGGCCCACAGCCTTACAGCTGTGGAGCACGGTATCCTCTGCCGAAACAGAGGTT  
GGACAAGACCGGAGGGGTCTCCTGGTTCCAAAGGAGATGTACTCCGGGCTTGTTACGACCTACCGTG  
+  
FFFFFFFFFFFFFFFFFFFFFFFFFFFFFFFFFFFFFFFFFFFFFFFFFFFFFFFFFFFFFFFFFFFFFFFFFFFFFFFF  
FFFFFFFFFFFFFFFFFFFFFFFFFFFFFFFFFFFFFFFFFFFFFFFFFFFFFFFFFFFFFFFFFFFFFFFFFFFFFFFF  
@A00155:342:HHGFNDSXY:1:2660:22806:19507 1:N:0:GAACCTAG+TCCGCATA  
GGCCAGAGGTGAGTCCTTAAGTGGACACAGCTGATCTAAGGCGGTGTAGCGGGCATGGGTTTGAACC  
CCCATGACGGTCGGAGTCTAGTAGGCTCCCTGATGAGTCCGTTCCAAGGACGAAACCGTCGTTAC  
+  
FFFFFFFFFFFFFFFFFFFFFFFFFFFFFFFFFFFFFFFFFFFFFFFFFFFFFFFFFFFFFFFFFFFFFFFFFFFFFFFF  
FFFFFFFFFFFFFFFFFFFFFFFFFFFFFFFFFFFFFFFFFFFFFFFFFFFFFFFFFFFFFFFFFFFFFFFFFFFFFFFF  
@A00155:342:HHGFNDSXY:1:2661:8223:3521 1:N:0:GAACCTAG+TCCGCATA  
CTTCTCTCGGGCCCACAGCCTTACAGCTGTGGAGCACGGTATCCTCTGCCGAAACAGAGGTTGGACAA  
GACCGGAGGGGTCTCCTAGTTCCAAAGGAGATGTACTCCGGGCTTGTTACGACCTACCGTGTAAGTC  
+  
FFFFFFFFFFFFFFFFFFFFFFFFFFFFFFFFFFFFFFFFFFFFFFFFFFFFFFFFFFFFFFFFFFFFFFFFFFFFFFFF  
FFFFFFFFFFFFFFFFFFFFFFFFFFFFFFFFFFFFFFFFFFFFFFFFFFFFFFFFFFFFFFFFFFFFFFFFFFFFFFFF  
@A00155:342:HHGFNDSXY:1:2661:32931:21261 1:N:0:GAACCTAG+TCCGCATA  
GAGGGCGAGAGAGAGCGACTTCTCTCGGGCCCACAGCCTTACAGCTGTGGAGCACGGTATCCTCTGCC  
GAAACAGAGGTTGGACAAGACCGGAGGGGTCTCCTAGTTCCATAGGAGATGTACTCCGGGCTTGTTCA  
+  
FFFFFFFF:FFFFFFFFFFFFFFFFFFFFFFFFFFFFFFFFFFFFFFFFFFFFFFFFFFFFFFFFFFFFFFFFFFFF  
F:FFFFFFFFFFFFFFFFFFFFFFFFFFFFFFFFFFFFFFFFFFFFFFFFFFFFFFFFFFFFFFFFFFFFFFFFFFFF  
@A00155:342:HHGFNDSXY:1:2662:28899:14716 1:N:0:GAACCTAG+TCCGCATA  
ATCAGCTGTGTCCACTTAAGGACTCACCTCTGGCCTATGGTCATCTCAATGCCGAGAGGGATGTGGAG  
GGCGAGAGAGAGCGACTTCTCTCGGGCCCACAGCCTTACAGCTGTGGAGCACGGTATCCTCTGC  
+  
FFFFFFF,FFFFFFFFFFFFFFFFFFFFFFFFFFFFFFFFFFFFFFFFFFFFFFFFFFFFFFFFFFFFFFFFFFFF  
FFFFFFFFF,FFFFFFFFF:FFFFFFFFF,FF:FFFFFF:F:FFF:FFFFFFFFFFFFFFFFFFFFFFFFFFFF  
@A00155:342:HHGFNDSXY:1:2662:10836:21449 1:N:0:GAACCTAG+TCCGCATA  
CTTCTCTCGGGCCCACAGCCTTACAGCTGTGGAGCACGGTATCCTCTGCCGAAACAGAGGTTGGACAA  
GACCGGAGGGGTCTCCTAGTTCCAAAGGAGATGTACTCCGGGCTTGTTACGACCTACCGTGTAAGTC  
+  
FFFFFFFFFFFFFFFFFFFFFFFFFFFFFFFFFFFFFFFFFFFFFFFFFFFFFFFFFFFFFFFFFFFFFFFFFFFF  
FFFFFFFFFFFFFFFFFFFFFFFFFFFFFFFFFFFFFFFFFFFFFFFFFFFFFFFFFFFFFFFFFFFFFFFFFFFF  
@A00155:342:HHGFNDSXY:1:2662:18132:21527 1:N:0:GAACCTAG+TCCGCATA  
CTTCTCTCGGGCCCACAGCCTTACAGCTGTGGAGCACGGTATCCTCTGCCGAAACAGAGGTTGGACAA  
GACCGGAGGGGTCTCCTGGTTCCAAAGGAGATGTACTCCGGGCTTGTTACGACCTACCGTGTAAGTC  
+  
FFFFFFFFFFFFFFFFFFFFFFFFFFFFFFFFFFFFFFFFFFFFFFFFFFFFFFFFFFFFFFFFFFFFFFFFFFFF  
F,FFFFFFF:FFFFFFFFFFFFFFFFFFFFFFFFFFFFFFFFFFFFFFFFFFFFFFFFFFFFFFFFFFFFFFFFFFFF  
@A00155:342:HHGFNDSXY:1:2662:10773:21590 1:N:0:GAACCTAG+TCCGCATA  
CTTCTCTCGGGCCCACAGCCTTACAGCTGTGGAGCACGGTATCCTCTGCCGAAACAGAGGTTGGACAA  
GACCGGAGGGGTCTCCTAGTTCCAAAGGAGATGTACTCCGGGCTTGTTACGACCTACCGTGTAAGTC  
+  
FFFFFFFFFFFFFFFFFFFFFFFFFFFFFFFFFFFFFFFFFFFFFFFFFFFFFFFFFFFFFFFFFFFFFFFFFFFF  
FFFFFFFFF:FFFFFFFFFFFFFFFFFFFFFFFFFFFFFFFFFFFFFFFFFFFFFFFFFFFFFFFFFFFFFFFFFFFF  
@A00155:342:HHGFNDSXY:1:2662:9796:24283 1:N:0:GAACCTAG+TCCGCATA  
CCCATGACGGTCGGAGTCTAGTAGGCTCCCTGATGAGTCCGTTCCAAGGACGAAACCGTCGTTACTCT

TTGAGTTGTGTAAGTTTCGTCCTAAAAAGGACTCGTCAGGTAGCCTACTAGACTACGAC  
+  
FFFFFFFFFFFFFFFFFFFFFFFFFFFFFFFFFFFFFFFFFFFFFFFFFFFFFFFFFFFFFFFFFFFFFFFFF,  
FFFFFFFF:FFFFFFFFFFFFFFFFFFFFFFFFFFFFFFFFFFFFFFFFFFFFFFFFFFFFFFFFFFFFF  
@A00155:342:HHGFNDSXY:1:2663:30698:15076 1:N:0:GAACCTAG+TCCGCATA  
TCGGCAGAGGATACCGTGCTCCACAGCTGTAAGGCTGTGGGCCCGAGAGAAGTCGCTCTCTCGCCC  
TCCACATCCCTCTCGGCATTGAGATGACCATAGGCCAGAGGAGAGTCCTTAAGTGGAC  
+  
FFFFFFFFFFFFFFFFFFFFFFFFFFFFFFFFFFFFFFFFFFFFFFFFFFFFFFFFFFFFFFFFFFFFFFFFF  
FFFFFFFFFFFFFFFFFFFFFFFFFFFFFFFFFFFFFFFFFFFFFFFFFFFFFFFFFFFFFFFFFFFFFFFFF  
@A00155:342:HHGFNDSXY:1:2663:23990:18051 1:N:0:GAACCTAG+TCCGCATA  
GTCCACTTAAGGACTCACCTCTGGCCTATGGTCATCTCAATGCCGAGAGGGATGTGGAGGGCGAGAGA  
GAGCGACTTCTCTCGGGCCCACAGCCTTACAGCTGTGGAGCACGGTATCCTCTGCCGAAACAGAGGTT  
+  
FFFFFFFFFFFFFFFFFFFFFFFFFFFFFFFFFFFFFFFFFFFFFFFFFFFFFFFFFFFFFFFFFFFFFFFFF  
FFFFFFFFFFFFFFFFFFFFFFFFFFFFFFFFFFFFFFFFFFFFFFFFFFFFFFFFFFFFFFFFFFFFFFFFF  
@A00155:342:HHGFNDSXY:1:2663:13232:26537 1:N:0:GAACCTAG+TCCGCATA  
ATCCTCTGCCGAAACAGAGGTTGGACAAGACCGGAGGGGTCTCCTAGTTCCAAAGGAGATGTACTCCG  
GGCTTGTTACGACCTACCGTGTAAGTCGTAGTCTAGTAGGCTACCTGACGAGTCCTTTTATAGGACGA  
+  
FFFFFFFFFFFFFFFFFFFFFFFFFFFFFFFFFFFFFFFFFFFFFFFFFFFFFFFFFFFFFFFFFFFFFFFFF  
FFFFFFFFFFFFFFFFFFFFFFFFFFFFFFFFFFFFFFFFFFFFFFFFFFFFFFFFFFFFFFFFFFFFFFFFF  
@A00155:342:HHGFNDSXY:1:2663:5656:32487 1:N:0:GAACCTAG+TCCGCATA  
AAGGACTCACCTCTGGCCTATGGTCATCTCAATGCCGAGAGGGATGTGAAGGGCGAGAGAGAGCGACT  
TCTCTCGGGCCCACAGCCTTACAGCTGTGGAGCACGGTATCCTCTGCCGAAACAGAGGTTGG  
+  
FFFFFFFFFFFFFFFFFFFFFFFFFFFFFFFFFFFFFFFFFFFFFFFFFFFFFFFFFFFFFFFFFFFFFFFFF  
FFFFFFFFFFFFFFFFFFFFFFFFFFFFFFFFFFFFFFFFFFFFFFFFFFFFFFFFFFFFFFFFFFFFFFFFF,FFF  
@A00155:342:HHGFNDSXY:1:2664:4607:2801 1:N:0:GAACCTAG+TCCGCATA  
GGATGTGGAGGGCGAGAGAGAGCGACTTCTCTCGGGCCCACAGCCTTACAGCTGTGGAGCACGGTATC  
CTCTGCCGAAACAGAGGTTGGACAAGACCGGAGGGGTCTCCTAGTTCCAAAGGAGATGTACTCC  
+  
FFFFFFFFFFFFFFFFFFFFFFFFFFFFFFFFFFFFFFFFFFFFFFFFFFFFFFFFFFFFFFFFFFFFFFFFF  
FFFFFFFFFFFFFFFFFFFFFFFFFFFFFFFFFFFFFFFFFFFFFFFFFFFFFFFFFFFFFFFFFFFFFFFFF  
@A00155:342:HHGFNDSXY:1:2664:11143:18975 1:N:0:GAACCTAG+TCCGCATA  
ATCTCAATGCCGAGAGGGATGTGGAGGGCGAGAGAGAGCGACTTCTCTCGGGCCCACAGCCTTACAGC  
TGTGGAGCACGGTATCCTCTGCCGAAACAGAGGTTGGACAAGACCGGAGGGGTCTCCTAGTTCCAAAG  
+  
FFFFFFFFFFFFFFFFFFFFFFFFFFFFFFFFFFFFFFFFFFFFFFFFFFFFFFFFFFFFFFFFFFFFFFFFF  
FFFFFFFFFFFFFFFFFFFFFFFFFFFFFFFFFFFFFFFFFFFFFFFFFFFFFFFFFFFFFFFFFFFFFFFFF  
@A00155:342:HHGFNDSXY:1:2665:4535:17863 1:N:0:GAACCTAG+TCCGCATA  
GAGCGACTTCTCTCGGGCCCACAGCCTTACAGCTGTGGAGCACGGTATCCTCTGCCGAAACAGAGGTT  
GGACAAGACCGGAGGGGTCTCCTAGTTCCAAAGGAGATGTACTCCGGGCTTGTTACGACCTACCGTG  
+  
FFFFFFFFFFFFFFFFFFFFFFFFFFFFFFFFFFFFFFFFFFFFFFFFFFFFFFFFFFFFFFFFFFFFFFFFF  
FFFFFFFFFFFFFFFFFFFFFFFFFFFFFFFFFFFFFFFFFFFFFFFFFFFFFFFFFFFFFFFFFFFFFFFFF  
@A00155:342:HHGFNDSXY:1:2665:2537:18693 1:N:0:GAACCTAG+TCCGCATA  
TCCTCTGCCGAAACAGAGGTTGGACAAGACCGGAGGGGTCTCCTAGTTCCAAAGGAGATGTACTCCGG  
ACTTGTTACGACCTACCGTGTAAGTCGTAGTCTAGTAGGCTACCTGACGAGTCCTTTTATAGGACGAA  
+  
FFFFFFFFFFFFFFFFFFFFFFFFFFFFFFFFFFFFFFFFFFFFFFFFFFFFFFFFFFFFFFFFFFFFFFFFF  
FFFFFFFFFFFFFFFFFFFFFFFFFFFFFFFFFFFFFFFFFFFFFFFFFFFFFFFFFFFFFFFFFFFFFFFFF  
@A00155:342:HHGFNDSXY:1:2666:11803:4961 1:N:0:GAACCTAG+TCCGCATA  
GGATGTGGAGGGCGAGAGAGAGCGACTTCTCTCGGGCCCACAGCCTTACAGCTGTGGAGCACGGTATC

CTCTGCCGAAACAGAGGTTGGACAAGACCGGAGGGGTCTCCTAGTTCCAAAGGAGATGTACTCCGGGC  
+  
FFFFFFFFFFFFFFFFFFFFFFFFFFFFFFFFFFFFFFFFFFFFFFFFFFFFFFFFFFFFFFFFFFFFFFFF  
FFFFFFFFFFFFFFFFFFFFFFFFFFFFFFFFFFFFFFFFFFFFFFFFFFFFFFFFFFFFFFFFFFFFFFFF  
@A00155:342:HHGFNDSXY:1:2666:15004:4993 1:N:0:GAACCTAG+TCCGCATA  
ATCTCAATGCCGAGAGGGATGTAGAGGGCGAGAGAGAGCGACTTCTCTCGGGCCCACAGCCTTACAGC  
TGTGGAGCACGGTATCCTCTGCCGAAACAGAGGTTGGACAAGACCGGAGGGGTCTCCTAGTTCCAAAG  
+  
FFFFFFFFFFFFFFFFFFFFFFFF:FFFFFFFFFFFFFFFFFFFFFFFFFFFFFFFFFFFFFFFF,FFFFF  
FFFFFFFFFFFFFFFFFFFFFFFFFFFFFFFFFFFFFFFFFFFFFFFFFFFFFFFFFFFFFFFFFFFFFFFF:FFFFF  
@A00155:342:HHGFNDSXY:1:2666:10203:18161 1:N:0:GAACCTAG+TCCGCATA  
TACACGGTAGGTCGTGAACAAGCCCGAGTACATCTCCTTTGGAAGTAGGA  
+  
FFFFFFFFFFFFFFFFFFFFFFFFFFFFFFFFFFFFFFFFFFFFFFFFFFFFFFFFFFFFFFFFFFFF  
@A00155:342:HHGFNDSXY:1:2666:1579:23547 1:N:0:GAACCTAG+TCCGCATA  
ATCTCAATGCCGAGAGGGATGTGGAGGGCGAGAGAGAGCGACTTCTCTCGGGCCCACAGCCTTACAGC  
TGTGGAGCACGGTATCCTCTGCCGAAACAGAGGTTGGACAAGACCGGAGGGGTCTCCTAGTTCCAAAG  
+  
FFFFFFFFFFFFFFFFFFFFFFFF:FFFFFFFFFFFFFFFFFFFFFFFFFFFFFFFFFFFFFFFFFFFFFFFF  
FFFFFFFFF:FFFFFFFF:FFFFFFFFFFFFFFFFFFFFFFFFFFFFFFFFFFFFFFFFFFFFFFFFFFFFF:FFFFFFFF  
@A00155:342:HHGFNDSXY:1:2667:21323:14340 1:N:0:GAACCTAG+TCCGCATA  
CCTCCACATCCCTCTCGGCATTGAGATGACCATAGGCCAGAGGTGAGTCCTTAAGTGGACACAGCTGA  
TCTAAGGCGGTGTGGTGGGGCATGGGTTTGAACCCCATGACGGTCGGAGTCTAGTAGGCTCCCT  
+  
FFFFFFFFFFFFFFFFFFFFFFFF:FFFFFFFFFFFFFFFFFFFFFFFFFFFFFFFFFFFFFFFFFFFFFFFF  
FFFFFFFFFFFFFFFFFFFFFFFFFFFFFFFFFFFFFFFFFFFFFFFFFFFFFFFFFFFFFFFFFFFFFFFFFFFF  
@A00155:342:HHGFNDSXY:1:2667:3848:32174 1:N:0:GAACCTAG+TCCGCATA  
CAATGCCGAGAGGGATGTGGAGGGCGAGAGAGAGCGACTTCTCTCGGGCCCACAGCCTTACAGCTGTG  
GAGCACGGTATCCTCTGCCGAAACAGAGGTTGGACAAGACCGGAGGGGTCTCCTAGTTCCAAAGGAGA  
+  
FFFFFFFFF:FFFFF,FF,FF:FFFFFFFFF:F:FFF:FFFFF,F,,FFFFFFFFF,FFF:F:FFFFFFFF  
FFFFFFFFFFFFFFFFFFFFFFFFFFFFFFFFFFFFFFFFFFFFFFFFFFFFFFFFFFFFFFFFFFFFFFFFFFFF  
@A00155:342:HHGFNDSXY:1:2667:18367:32236 1:N:0:GAACCTAG+TCCGCATA  
GAGAGAGCGACTTCTCTCGGGCCCACAGCCTTACAGCTGTGGAGCACGGTATCCTCTGCCGAAACAGA  
GGTTGGACAAGACCGGAGGGGTCTCCTGGTTCCAAAGGAGATGTACTCCGGGCTTGTT  
+  
FFFFFFFFFFFFFFFFFFFFFFFFFFFFFFFFFFFFFFFFFFFFFFFFFFFFFFFFFFFFFFFFFFFFFFFFFFFF  
FFFFFFFFFFFFFFFFFFFFFFFFFFFFFFFFFFFFFFFFFFFFFFFFFFFFFFFFFFFFFFFFFFFFFFFFFFFF  
@A00155:342:HHGFNDSXY:1:2668:6117:4131 1:N:0:GAACCTAG+TCCGCATA  
TTCTCTCGGGCCCACAGCCTTACAGCTGTGGAGCACGGTATCCTCTGCCGAAACAGAGGTTGGACAAG  
ACCGGAGGGGTCTCCTGGTTCCAAAGGAGATGTACTCCGGGCTTGTTACGACCTACCGTGTAAGTCG  
+  
FF:FFFFFFFFFFFFFFFFFFFFFFFF:FFFFFFFFFFFF:FFFFFFFFFFFFFFFFFFFFFFFFFFFFFFFFFFFF  
FFFFFFFFFFFFFFFFFFFFFFFFFFFF:FF,FFFF:FFFFFFFF:FFFF,FFFFFFFFFFFFF:F:FFFFFFFF  
@A00155:342:HHGFNDSXY:1:2668:2953:7326 1:N:0:GAACCTAG+TCCGCATA  
CTTCTCTCGGGCCCACAGCCTTACAGCTGTGGAGCACGGTATCCTCTGCCGAAACAGAGGTTGGACAA  
GACCGGAGGGGTCTCCTAGTTCCAAAGGAGATGTACTCCGGGCTTGTTACGACCTACCGTGTAAGTC  
+  
FFFFFFFFFFFFFFFFFFFFFFFFFFFFFFFFFFFFFFFFFFFFFFFFFFFFFFFFFFFFFFFFFFFFFFFFFFFF  
:FFFFFFFFFFFFFFFFFFFFFFFFFFFFFFFFFFFFFFFFFFFFFFFFFFFFFFFFFFFFFFFFFFFFFFFFFFFF  
@A00155:342:HHGFNDSXY:1:2668:21251:14716 1:N:0:GAACCTAG+TCCGCATA  
TTAAGGACTCACCTCTGGCCTATGGTCATCTCAATGCCGAGAGGGATGTGGAGGGCGAGAGAGAGCGA  
CTTCTCTCGGGCCCACAGCCTTACAGCTGTGGAGCACGGTATCCTCTGCCGAAACAGAGGTTGGACAA  
+

FFFFFFFFFFFFFFFFFFFFFFFFFFFFFFFFFFFFFFFFFFFFFFFFFFFFFFFFFFFFFFFFFFFFFFFF  
FFFFFFFFFFFFFFFFFFFFFFFFFFFFFFFFFFFFFFFFFFFFFFFFFFFFFFFFFFFFFFFFFFFFFFFF  
@A00155:342:HHGFNDSXY:1:2668:19931:27680 1:N:0:GAACCTAG+TCCGCATA  
ACTTCTCTCGGGCCACAGCCTTACAGCTGTGGAGCACGGTATCCTCTGCCGAAACAGAGGTTGGACA  
AGACCGGAGGGGTCTCCTAGTTCCAAAGGAGATGTACTCCGGGCTTGTTACGACCTACCGTGTAAGT  
+  
FFFFFFFFFFFFFFFFFFFFFFFFFFFFFFFFFFFFFFFFFFFFFFFFFFFFFFFFFFFFFFFFFFFFFFFF  
FFFF:FF:FFFF:FFFFFFFFFFFFFFFFFFFFFFFFFFFFFFFFFFFFFFFFFFFFFFFFFFFFFFFF  
@A00155:342:HHGFNDSXY:1:2668:11071:32972 1:N:0:GAACCTAG+TCCGCATA  
CTCAATGCCGAGAGGGATGTGGAGGGCGAGAGAGAGCGACTTCTCTCGGGCCACAGCCTTACAGCTG  
TGGAGCACGGTATCCTCTGCCGAAACAGAGGTTGGACAAGACCGGAGGGGTCTCCTAGTTCCAAAGG  
+  
FFFFFFFFFFFFFFFFFFFFFFFFFFFFFFFFFFFFFFFFFFFFFFFFFFFFFFFFFFFFFFFFFFFFFFFF  
FFFFFFFFFFFFFFFFFFFFFFFFFFFFFFFFFFFFFFFFFFFFFFFFFFFFFFFFFFFFFFFFFFFFFFFF  
@A00155:342:HHGFNDSXY:1:2669:3115:8641 1:N:0:GAACCTAG+TCCGCATA  
CCTTACAGCTGTGGAGCACGGTATCCTCTGCCGAAACAGAGGTTGGACAAGACCGGAGGGGTCTCCTA  
GTTCCAAAGGAGATGTACTCCGGGCTTGTTACGACCTACCGTGTAAGTCGTAGTCTAGTAGGCTACC  
+  
FFFFFFFFFFFFFFFFFFFFFFFFFFFFFFFFFFFFFFFFFFFFFFFFFFFFFFFFFFFFFFFFFFFFFFFF  
FFFFFFFFFFFFFFFFFFFFFFFFFFFFFFFFFFFFFFFFFFFFFFFFFFFFFFFFFFFFFFFFFFFFFFFF  
@A00155:342:HHGFNDSXY:1:2669:23701:12132 1:N:0:GAACCTAG+TCCGCATA  
TGCCGAGAGGGATGTGGAGGGCGAGAGAGAGCGACTTCTCTCGGGCCACAGCCTTACAAGTGTGGAG  
CACGGTATCCTCTGCCGAAACAGAGGTTGGACAAGACCGGAGGGGTCTCCTAGTTCCAAAGGAGATGT  
+  
FFFFFFFFFFFF:FFFFFFFFFFFFFFFFFFFFFFFFFFFFFFFFFFFFFFFFFFFFFFFFFFFFFFFFFFFF  
FFFFFFFFFFFFFFFFFFFFFFFFFFFFFFFFFFFFFFFFFFFFFFFFFFFFFFFFFFFFFFFFFFFFFFFF  
@A00155:342:HHGFNDSXY:1:2669:3595:15890 1:N:0:GAACCTAG+TCCGCATA  
CAGCCTTACAGCTGTGGAGCACGGTATCCTCTGCCGAAACAGAGGTTGGACAAGACCGGAGGGGTCTC  
CTGTTCCAAAGGAGATGTACTCCGGGCTTGTTACGACCTACCGTGTAAGTCGTAGTCTAGTAGGCT  
+  
FFFFFFF,FFFFFFFFFFFFFFFFFFFFFFFFFFFFFFFFFFFFFFFFFFFFFFFFFFFFFFFFFFFFFFFF  
FFFFFFFFFFFFFFFFFFFFFFFFFFFFFFFFFFFFFFFFFFFFFFFFFFFFFFFFFFFFFFFFFFFFFFFF  
@A00155:342:HHGFNDSXY:1:2669:28004:21903 1:N:0:GAACCTAG+TCCGCATA  
TGCCGAGAGGGATGTGGAGGGCGAGAGAGAGCGACTTCTCTCGGGCCACAGCCTTACAGCTGTGGAG  
CACGGTATCCTCTGCCGAAACAGAGGTTGGACAAGACCGGAGGGGTCTCCTAGTTCCAAAGGAGATGT  
+  
FFFFFFFFFFFFFFFFFFFFFFFFFFFFFFFFFFFFFFFFFFFFFFFFFFFFFFFFFFFFFFFFFFFFFFFF  
FFFFFFFFFFFFFFFFFFFFFFFFFFFFFFFFFFFFFFFFFFFFFFFFFFFFFFFFFFFFFFFFFFFFFFFF  
@A00155:342:HHGFNDSXY:1:2669:20826:22623 1:N:0:GAACCTAG+TCCGCATA  
GCGAGAGAGAGCGACTTCTCTCGGGCCACAGCCTTACAGCTGTGGAGCACGGTATCCTCTGCCGAAA  
CAGAGGTTGGACAAGACCGGAGGGGTCTCCTAGTTCCAAAGGAGATGTACTCCGGGCTTGTTACGAC  
+  
FFFFFFFFFFFFFFFFFFFFFFFFFFFFFFFFFFFFFFFFFFFFFFFFFFFFFFFFFFFFFFFFFFFFFFFF  
FFFFFFFFFFFFFFFFFFFFFFFFFFFFFFFFFFFFFFFFFFFFFFFFFFFFFFFFFFFFFFFFFFFFFFFF  
@A00155:342:HHGFNDSXY:1:2669:31439:25379 1:N:0:GAACCTAG+TCCGCATA  
GCGACTTCTCTCGGGCCACAGCCTTACAGCTGTGGAGCACGGTATCCTCTGCCGAAACAGAGGTTGG  
ACAAGACCGGAGGGGTCTCCTAGTTCCAAAGGAGATGTACTCCGGGCTTGTTACGACCTACCG  
+  
FFFFFFFFFFFFFFFFFFFFFFFFFFFFFFFFFFFFFFFFFFFFFFFFFFFFFFFFFFFFFFFFFFFFFFFF  
FFFFFFFFFFFFFFFFFFFFFFFFFFFFFFFFFFFFFFFFFFFFFFFFFFFFFFFFFFFFFFFFFFFFFFFF  
@A00155:342:HHGFNDSXY:1:2670:9173:1313 1:N:0:GAACCTAG+TCCGCATA  
GAGCGACTTCTCTCGGGCCACAGCCTTACAGCTGTGGAGCACGGTATCCTCTGCCGAAACAGAGGTT  
GGACAAGACCGGAGGGGTCTCCTAGTTCCAAAGGAGATGTACTCCGGGCTTGTTACGACCTACCGTG  
+

FFFFFFFFFFFFFFFFFFFFFFFFFFFFFFFFFFFFFFFFFFFFFFFFFFFFFFFFFFFFFFFFFFFFFFFF  
FFFFFFFFFFFFFFFFFFFFFFFFFFFFFFFFFFFFFFFFFFFFFFFFFFFFFFFFFFFFFFFFFFFFFFFF  
@A00155:342:HHGFNDSXY:1:2670:23737:4711 1:N:0:GAACCTAG+TCCGCATA  
GAGAGAGCGACTTCTCTCGGGCCCACAGCCTTACAGCTGTGGAGCACGGTATCCTCTGCCGAAACAGA  
GGTTGGACAAGACCGGAGGGGTCTCCTAGTTCCATAGGAGATGTACTCCGGGCTTGTTACGACCTAC  
+  
FFFFFFFFFFF:F:FFFFFFFFFFFFFFFFFFFFFFFFFFFFFFFFFFFFFFFFFFFFFFFFFFFFFFFF  
FFFFFFFFFFFFFFFFFFFFFFFFFFFFFFFFFFFFFFFFFFFFFFFFFFFFFFFFFFFFFFFFFFFFFFFF  
@A00155:342:HHGFNDSXY:1:2670:29658:5603 1:N:0:GAACCTAG+TCCGCATA  
GAGCGACTTCTCTCGGGCCCACAGCCTTACAGCTGTGGAGCACGGTATCCTCTGCCGAAACAGAGGTT  
GGACAAGACCGGAGGGGTCTCCTAGTTCCAAAGGAGATGTACTCCGGGCTTGTTACGACCTACCGTG  
+  
FFFFFFFFFFFFFFFFFFFFFFFFFFFFFFFFFFFFFFFFFFFFFFFFFFFFFFFFFFFFFFFFFFFFFFFF  
FFFFFFFFFFFFFFFFFFFFFFFFFFFFFFFFFFFFFFFFFFFFFFFFFFFFFFFFFFFFFFFFFFFFFFFF  
@A00155:342:HHGFNDSXY:1:2670:9019:8469 1:N:0:GAACCTAG+TCCGCATA  
CCATGCCCGCCACACCGCCTTAGATCAGCTGTGTCCACTTAAGGACTCACCTCTGGCCTATGGTCAT  
CTCAATGCCGAGAGGGATGTGGAGGGCGAGAGAGAGCGACTTCTCTCGGGCCCACAGCCTTACAGCTG  
+  
FFFFFFFFFFFFFFFFFFFFFFFFFFFFFFFFFFFFFFFFFFFFFFFFFFFFFFFFFFFFFFFFFFFFFFFF  
FFFFFFFFFFFFFFFFFFFFFFFFFFFFFFFFFFFFFFFFFFFFFFFFFFFFFFFFFFFFFFFFFFFFFFFF  
@A00155:342:HHGFNDSXY:1:2670:17463:9126 1:N:0:GAACCTAG+TCCGCATA  
CTTCTCTCGGGCCCACAGCCTTACAGCTGTGGAGCACGGTATCCTCTGCCGAAACAGAGGTTGGACAA  
GACCGGAGGGGTCTCCTCGTTCCAAAGGAGATGTACTCCGGGCTTGTTACGACCTACCGTGTAAGTC  
+  
FFF:FFFFFF:FFFFFFF,FFFFFFF,:FFFF,FFFFFFFF:FFFFFFFFFFFFFFFFFFFFF  
FFFF,:F:FFFFFF:FFF,FFFFFFFFFFFFFFFFFFFFFFFFFFFFFFFFFFFFFFFF:FFF:FFFFFFF  
@A00155:342:HHGFNDSXY:1:2670:20320:25410 1:N:0:GAACCTAG+TCCGCATA  
TATCCTCTGCCGAAACAGAGGTTGGACAAGACCGGAGGGGTCTCCTGGTTCCAAAGGAGATGTACTCC  
GGGCTTGTTACGACCTACCGTGTAAGTCGTAGTCTAGTAGGCTACCTGACGAGTCCTTTTAGGACG  
+  
FFFFFFFFFFFFFFFFFFF:FFFFFFFFFFF:FFFFFFFFFFFFF:FFFFFFFFFFFFFFFFFFFFF  
FFFFFFFFFFFFFFFFFFFFFFFFFFFFFFFFFFFFFFFFFFFFFFFFFFFFFFFFFFFFFFFFFFFFF:FFFFFFFFFFFFFFFFFFFFF  
@A00155:342:HHGFNDSXY:1:2670:32904:30358 1:N:0:GAACCTAG+TCCGCATA  
GAGCGACTTCTCTCGGGCCCACAGCCTTACAGCTGTGGAGCACGGTATCCTCTGCCGAAACAGAGGTT  
GGACAAGACCGGAGGGGTCTCCTGGTTCCAAAGGAGATGTACTCCGGGCTTGTTACGACCTACCGTG  
+  
FFFFFFFFFFFFFFFFFFFFFFFFFFFFFFFFFFFFFFFFFFFFFFFFFFFFFFFFFFFFFFFFFFFFF:FFFFFFFFFFFFFFFFFFFFF  
FFFFFFFFFFFFFFFFFFFFFFFFFFFFFFFFFFFFFFFFFFFFFFFFFFFFFFFFFFFFFFFFFFFFF:FFFFFFFFFFFFF  
@A00155:342:HHGFNDSXY:1:2670:5005:31767 1:N:0:GAACCTAG+TCCGCATA  
AGCGACTTCTCTCGGGCCCACAGCCTTACAGCTGTGGAGCACGGTATCCTCTGCCGAAACAGAGGTTG  
GACAAGACCGGAGGGGTCTCCTAGTTCCAAAGGAGATGTACTCCGGGCTTGTTACGACCTACCGTGT  
+  
FFFFFFFFFFFFFFFFFFF:FFFFF:FFFFFFFFFFFFFFFFFFFFF:FFFFFFFFFFFFFFFFFFFFF  
FFFFF,FFFFFFFFFFFFFFFFFFFFFFFFFFFFFFFFFFFF,FFFFFFFFFFFFFFFFFFFFFFFFFFFFF  
@A00155:342:HHGFNDSXY:1:2671:26124:9972 1:N:0:GAACCTAG+TCCGCATA  
GAGAGAGAGCGACTTCTCTCGGGCCCACAGCCTTACAGCTGTGGAGCACGGTATCCTCTGCCGAAACA  
GAGGTTGGACAAGACCGGAGGGGTCTCCTAGTTCCAAAGGAGATGTACTCCGGGCTTGTTACGACCT  
+  
FFFFFFFFFFFFFFFFFFFFFFFFFFFFFFFFFFFFFFFFFFFFFFFFFFFFFFFFFFFFFFFFFFFFF  
FFFFFFFFFFFFFFFFFFFFFFFFFFFFFFFFFFFFFFFFFFFFFFFFFFFFFFFFFFFFFFFFFFFFF,FFFFFFFFFFFFFFFFFFFFF  
@A00155:342:HHGFNDSXY:1:2671:14751:17112 1:N:0:GAACCTAG+TCCGCATA  
GCGACTTCTCTCGGGCCCACAGCCTTACAGCTGTGGAGCACGGTATCCTCTGCCGAAACAGAGGTTGG  
ACAAGACCGGAGGGGTCTCCTGGTTCCAAAGGAGATGTACTCCGGGCTTGTTACGACCTACCG  
+



FFFFFFFFFFFFFFFFFFFFFFFFFFFFFFFFFFFFFFFFFFFFFFFFFFFFFFFFFFFFFFFFFFFFFFFF  
FF:FFFFFFFFFFFFFFFFFFFFFFFFFFFFFFFFFFFFFFFFFFFFFFFFFFFFFFFFFFFFFFFF:FFFFFFF  
@A00155:342:HHGFNDSXY:1:2671:28745:18959 1:N:0:GAACCTAG+TCCGCATA  
GAGCGACTTCTCTCGGGCCACAGCCTTACAGCTGTGGAGCACGGTATCCTCTGCCGAAACAGAGGTT  
GGACAAGACCGGAGGGGTCTCCTGGTTCCAAAGGAGATGTACTCCGGGCTTGTTACGACCTACCGTG  
+  
FFFFFFFFFFFFFFFFFFFFFFFFFFFFFFFFFFFFFFFFFFFFFFFFFFFFFFFFFFFFFFFFFFFFFFFF  
FFFFFFFFFFFFFFFFFFFFFFFFFFFFFFFFFFFFFFFFFFFFFFFFFFFFFFFFFFFFFFFFFFFFFFFF  
@A00155:342:HHGFNDSXY:1:2671:18575:34381 1:N:0:GAACCTAG+TCCGCATA  
CAGCCTTACAGCTGTGGAGCACGGTATCCTCTGCCGAAACAGAGGTTGGACAAGACCGGAGGGGTCTC  
CTAGTTCCAAAGGAGATGTACTCCGGGCTTGTTACGACCTACCGTGTAAGTCGTAGTCTAGTAGGCT  
+  
FFFFFFF:FFFF:F:FFF:FFFFFFFFFFFF:FFFFFFFFFFFFFFFFFFFFFFFFFFFFFFFFFFFFF  
FFFF:FFFFFFFFF:F:FFFF:FFFFF,FFFFFFFFFFFF,F:FF:FFFF:FFFFFFFFFFFFFFFFF  
@A00155:342:HHGFNDSXY:1:2672:14199:19789 1:N:0:GAACCTAG+TCCGCATA  
GCGAGAGAGAGCGACTTCTCTCGGGCCACAGCCTTACAGCTGTGGAGCACGGTATCCTCTGCCGAA  
CAGAGGTTGGACAAGACCGGAGGGGTCTCCTAGTTCCAAAGGAGATGTACTCCGGGCTTGTTACGAC  
+  
FFFFFFFFFFFFFFFFFFFFFFFFFFFFFFFFFFFFFFFFFFFFFFFFFFFFFFFFFFFFFFFFFFFFFFFF  
FFFFFFFFFFFFFFFFFFFFFFFFFFFFFFFFFFFFFFFFFFFFFFFFFFFFFFFFFFFFFFFFFFFFFFFF  
@A00155:342:HHGFNDSXY:1:2672:20121:23907 1:N:0:GAACCTAG+TCCGCATA  
GAGGGCGAGAGAGAGCGACTTCTCTCGGGCCACAGCCTTACAGCTGTGGTGCACGGTATCCTCTGCC  
GAAACAGAGGTTGGACAAGACCGGAGGGGTCTCCTAGTTCCAAAGGAGATGTACTCCGGGCTTGTTCA  
+  
FFFFFFFFFFFFFFFFFFFFFFFFFFFFFFFFFFFFFFFFFFFFFFFFFFFFFFFFFFFFFFFFFFFF,FFFFFFFFFFFFFFFFFFFF  
FFFFFFFFFFFFFFFFFFFF:FFFFF:FFFFFFFFFFFFFFFFFFFFFFFFFFFFFFFFFFFFFFFFFFFFF:FFF  
@A00155:342:HHGFNDSXY:1:2672:14290:28463 1:N:0:GAACCTAG+TCCGCATA  
TCCACATCCCTCTCGGCATTGAGATGACCATAGGCCAGAGGTGAGTCCTTAAGTGGACACAGCTGATC  
TAAGGCGGTGTGGCGGGGCATGGGTTTGAACCCCATGACGGTCGGAGTCTAGTAGGCTCCCTGATGA  
+  
FFFFFFFFFFFFFFFFFFFFFFFFFFFFFFFFFFFFFFFFFFFFFFFFFFFFFFFFFFFFFFFFFFFFFFFF  
FF:FFFFFFFFFFFFFFFFFFFFFFFFFFFFFFFFFFFFFFFFFFFFFFFFFFFFFFFFFFFFFFFF:FF  
@A00155:342:HHGFNDSXY:1:2672:20681:30264 1:N:0:GAACCTAG+TCCGCATA  
GGGCGAGAGAGAGCGACTTCTCTCGGGCCACAGCCTTACAGCTGTGGAGCACGGTATCCTCTGCCGA  
AACAGAGGTTGGACAAGACCGGAGGGGTCTCCTGGTTCCAAAGGAGATGTACTCCGGGCTTGTTACG  
+  
FFFFFFFFFFFFFFFFFFFFFFFFFFFFFFFFFFFFFFFFFFFFFFFFFFFFFFFFFFFFFFFFFFFFFFFF  
FFFFFFFFFFFFFFFFFFFFFFFFFFFFFFFFFFFFFFFFFFFFFFFFFFFFFFFFFFFFFFFFFFFF:FFFFFFFFFFFFFFFFFFFFF  
@A00155:342:HHGFNDSXY:1:2672:25771:31626 1:N:0:GAACCTAG+TCCGCATA  
CGACTTCTCTCGGGCCACAGCCTTACAGCTGTGGAGCACGGTATCCTCTGCCGAAACAGAGGTTGGA  
CAAGACCGGAGGGGTCTCCTAGTTCCAAAGGAGATGTACTCCGGGCTTGTTACGACCTACCGTGTA  
+  
FFFFFFFFFFFFFFFFFFFFFFFFFFFFFFFFFFFFFFFFFFFFFFFFFFFFFFFFFFFFFFFFFFFFFFFF  
FFFFFFFFFFFFFFFFFFFFFFFFFFFFFFFFFFFFFFFFFFFFFFFFFFFFFFFFFFFFFFFFFFFFFFFF:  
@A00155:342:HHGFNDSXY:1:2672:8079:33520 1:N:0:GAACCTAG+TCCGCATA  
GCGACTTCTCTCGGGCCACAGCCTTACAGCTGTGGAGCACGGTATCCTCTGCCGAAACAGAGGTTGG  
ACAAGACCGGAGGGGTCTCCTGGTTCCAAAGGAGATGTACTCCGGGCTTGTTACGACCTACCGTGTA  
+  
FFFFFFFFFFFFFFFFFFFFFFFFFFFFFFFFFFFFFFFFFFFFFFFFFFFFFFFFFFFFFFFFFFFFFFFF  
FFFFFFFFFFFFFFFFFFFFFFFFFFFFFFFFFFFFFFFFFFFFFFFFFFFFFFFFFFFFFFFFFFFFFFFF:FFFF  
@A00155:342:HHGFNDSXY:1:2672:27787:35336 1:N:0:GAACCTAG+TCCGCATA  
TCTCAATGCCGAGAGGGATGTGGAGGGCGAGAGAGAGCGACTTCTCTCGGGCCACAGCCTTACAGCT  
GTGGAGCACGGTATCCTCTGCCGAAACAGAGGTTGGACAAGACCGGAGGGGTCTCCTAGTTCCAAAGG  
+

FFFFFFFFFFFFFFFFFFFFFFFF:FFFFFFFFFFFFFFFFFFFFFFFF:FFFFFFFFFFFFFFFFFFFFFFFF:FFFFFFF  
FFFFFFFFFFFFFFFFFFFFFFFFFFFFFFFF:FFFFFFFFFFFFFFFFFFFFFFFF:FFFFFFFFFFFFFFFFFFFFFFFF:  
@A00155:342:HHGFNDSXY:1:2673:32642:14058 1:N:0:GAACCTAG+TCCGCATA  
CTTCTCTCGGGCCACAGCCTTACAGCTGTGGAGCACGGTATCCTCTGCCGAAACAGAGGTTGGACAA  
GACCGGAGGGGTCTCCTAGTTCCAAAGGAGATGTACTCCGGGCTTGTTACGACCTACCGTGTAAGTC  
+  
FFFFFFFFFFFFFFFFFFFFFFFFFFFFFFFFFFFFFFFFFFFFFFFFFFFFFFFFFFFFFFFFFFFFFFFFFFFFF  
FFFFFFFFFFFFFFFFFFFFFFFFFFFFFFFFFFFFFFFFFFFFFFFFFFFFFFFFFFFFFFFFFFFFFFFFFFFFF  
@A00155:342:HHGFNDSXY:1:2673:16685:14512 1:N:0:GAACCTAG+TCCGCATA  
CTTCTCTCGGGCCACAGCCTTACAGCTGTGGAGCACGGTATCCTCTGCCGAAACAGAGGTTGGACAA  
GACCGGAGGGGTCTCCTAGTTCCAAAGGAGATGTACTCCGGGCTTGTTACGACCTACCGTGTAAGTC  
+  
FF:FFF::FFF:FFFFFFFF:FFFFFFFFFFFFFFFF,FFFF:FFFFFF:FFFFFFFFFFFFFFFFFFFFF  
FFFFFFFFFFFFFFFF:FF,FFFF:FFF:FFF:F:FFFFFFFF:FFFFFFFFFFFFFFFF:FFFFFFFFF  
@A00155:342:HHGFNDSXY:1:2673:27715:16767 1:N:0:GAACCTAG+TCCGCATA  
AGCGACTTCTCTCGGGCCACAGCCTTACAGCTGTGGAGCACGGTATCCTCTGCCGAAACAGAGGTTG  
GACAAGACCGGAGGGGTCTCCTGGTTCCAAAGGAGATGTACTCCGGGCTTGTTACGACCTACCGTGT  
+  
FFFFFFFFFFFFFFFFFFFFFFFFFFFF,FFFFFFFFFFFFFFFFFFFFFFFFFFFFFFFFFFFFFFFFFFFFF  
FFFFF:FFFFFFFFFFFFFFFFFFFFFFFFFFFFFFFFFFFFFFFFFFFFFFFFFFFFFFFFFFFFFFFFFFFFF  
@A00155:342:HHGFNDSXY:1:2673:28754:31782 1:N:0:GAACCTAG+TCCGCATA  
AGGGCGAGAGAGAGCGACTTCTCTCGGGCCACAGCCTTACAGCTGTGGAGCACGGTATCCTCTGCCG  
AAACAGAGGTTGGACAAGACCGGAGGGGTCTCCTAGTTCCAAAGGAGATGTACTCCGGGCTTGTTAC  
+  
FFFFFFFFFFFFFFFFFFFFFFFFFFFFFFFFFFFFFFFFFFFFFFFFFFFFFFFFFFFFFFFFFFFFFFFFFFFFF  
FFFFFFFFFFFFFFFFFFFFFFFFFFFFFFFFFFFFFFFFFFFFFFFFFFFFFFFFFFFFFFFFFFFFFFFFFFFFF  
@A00155:342:HHGFNDSXY:1:2674:5032:1595 1:N:0:GAACCTAG+TCCGCATA  
GAGGGCGAGAGAGAGCGACTTCTCTCGGGCCACAGCCTTACAGCTGTGGAGCACGGTATCCTCTGCC  
GAAACAGAGGTTGGACAAGACCGGAGGGGTCTCCTAGTTCCAAAGGAGATGTACTCCGGGCTTGTTCA  
+  
FFFFFFFFFFFFFFFFFFFFFFFFFFFF,FFFF,FFFFFFFFFFFFFFFFFFFFFFFFFFFFFFFFFFFFFFFFFFFFF  
FFFFFFFFFFFFFFFFFFFFFFFF:FFFFFF:FFFFFFFFFFFF,FFFFFF:FFFFFFFFFFFFFFFF:FFFFFF  
@A00155:342:HHGFNDSXY:1:2674:12409:2628 1:N:0:GAACCTAG+TCCGCATA  
TTCTCTCGGGCCACAGCCTTACAGCTGTGGAGCACGGTATCCTCTGCCGAAACAGAGGTTGGACAAG  
ACCGGAGGGGTCTCCTAGTTCCAAAGGAGATGTACTCCGGGCTTGTTACGACTTACCGTGTAAGTCG  
+  
FFFFFFFFFFFFFFFFFFFFFFFFFFFFFFFFFFFFFFFFFFFFFFFFFFFFFFFFFFFFFFFFFFFFFFFFFFFFF  
FFFFFFFFFFFFFFFFFFFFFFFF:FFFFFFFFFFFFFFFFFFFFFFFFFFFFFFFFFFFFFFFFFFFFFFFFFFFFF  
@A00155:342:HHGFNDSXY:1:2674:18466:8359 1:N:0:GAACCTAG+TCCGCATA  
TGTTTTCGGCAGAGGATACCGTGCTCCACAGCTGTAAGGCTGTGGGCCCGAGAGAAGTCGCTCTCTCTC  
GCCCTCCACATCCCTCTCGGCATTGAGATGACCATAGGCCAGAGGTGAGTCCTTAAGTGGACACAGCT  
+  
FFFFFFFFFFFFFFFFFFFFFFFFFFFFFFFFFFFFFFFFFFFFFFFFFFFFFFFFFFFFFFFFFFFFFFFFFFFFF  
FFFFFFFFFFFFFFFFFFFFFFFF:FFFFFFFFFFFFFFFFFFFFFFFFFFFFFFFFFFFFFFFFFFFFFFFFFFFFF  
@A00155:342:HHGFNDSXY:1:2674:22173:18161 1:N:0:GAACCTAG+TCCGCATA  
CTCTCTCGCCCTCCACATCCCTCTCGGCATTGAGATGACCATAGGCCAGAGGTGAGTCCTTAAGTGGAC  
CACAGCTGATCTAAGGCGGTGTGGCGGGGCATGGGTTTGAACCCCATGACGGTCGGAGTCTAGTAGG  
+  
FFFFFFFFFFFFFFFFFFFFFFFFFFFFFFFFFFFFFFFFFFFFFFFFFFFFFFFFFFFFFFFFFFFFFFFFFFFFF  
FFFFFFFFFFFFFFFFFFFFFFFF:FFFFFFFFFFFFFFFFFFFFFFFFFFFFFFFFFFFFFFFFFFFFFFFFFFFFF  
@A00155:342:HHGFNDSXY:1:2674:16288:19085 1:N:0:GAACCTAG+TCCGCATA  
CGAGAGGGATGTGGAGGGCGAGAGAGAGCGACTTCTCTCGGGCCACAGCCTTACAGCTGTGGAGCAC  
GGTATCCTCTGCCGAAACAGAGGTTGGACAAGACCGGAGGGGTCTCCTGGTTCCAAAGGAGATGTACT  
+

FFFFFFFFFFFFFFFFFFFFFFFFFFFFFFFFFFFFFFFFFFFFFFFFFFFFFFFFFFFFFFFFFFFFFFFF  
FFFFFFFFFFFFFFFFFFFFFFFFFFFFFFFFFFFFFFFFFFFFFFFFFFFFFFFFFFFFFFFFFFFFFFFF  
@A00155:342:HHGFNDSXY:1:2674:15519:22232 1:N:0:GAACCTAG+TCCGCATA  
GGGGCATGGGTTTGAACCCCATGACGGTCGGAGTCTAGTAGGCTCCCTGATGAGTCCGTTCCAAGGA  
CGACACCGTCGTTACTCTTCGAGTTGTGTAAGTTTCGTCCTAAAAAGGACTCGTCAGGT  
+  
FFFFFFFFFF:FFFFFFFFFFFFFFFFFFFFFFFFFFFFFFFFFFFFFFFFFFFFFFFFFFFFFFFFFFFF  
FF,F,FFFFFFFFFFFFFFFFFFFFFFFFFFFFFFFFFFFFFFFFFFFFFFFFFFFFFFFFFFFFFFFF  
@A00155:342:HHGFNDSXY:1:2674:15763:32268 1:N:0:GAACCTAG+TCCGCATA  
GGACTCACCTCTGGCCTATGGTCATCTCAATGCCGAGAGGGATGTGAAGGGCGAGAGAGAGCGACTTC  
TCTCGGGCCACAGCCTTACAGCTGTGGAGCACGGTATCCTCTGCC  
+  
FFFFFFF:FFFFFFFFFFFFFFFFFFFFFFFFFFFFFFFFFFFFFFFFFFFFFFFFFFFFFFFFFFFF  
FFFFFFFFFFFFFFFFFFFFFFFFFFFFFFFFFFFFFFFFFFFFFFFFFFFFFFFFFFFFFFFFFFFF  
@A00155:342:HHGFNDSXY:1:2675:29197:2613 1:N:0:GAACCTAG+TCCGCATA  
CTTCTCTCGGGCCACAGCCTTACAGCTGTGGAGCACGGTATCCTCTGCCGAAACAGAGGTTGGACAA  
GACCGGAGGGGTCTCCTGGTTCCAAAGGAGATGTACTCCGGGCTTGTTACGACCTACCGTGTAAGTC  
+  
FFFFFFFFFFFFFFFFFFFFFFFFFFFFFFFFFFFFFFFFFFFFFFFFFFFFFFFFFFFFFFFFFFFF  
FFFFFFFFFFFFFFFFFFFFFFFFFFFFFFFFFFFFFFFFFFFFFFFFFFFFFFFFFFFFFFFFFFFF  
@A00155:342:HHGFNDSXY:1:2675:5249:10019 1:N:0:GAACCTAG+TCCGCATA  
AGACTCACCTCTGGCCTATGGTCATCTCAATGCCGAGAGGGATGTGGAGGGCGAGAGAGAGCGACTTC  
TCTCGGGCCACAGCCTTACAGCTGTGGAGCACGGTATCCTCTGCCGAAACAGAGGTTGGACAAGACC  
+  
FFFFFFFFFFFFFFFFFFFF:FFFFFFFFFFFFFFFFFFFFFFFFFFFFFFFFFFFFFFFFFFFFFFFFFFFF  
FFFFFFFFFFFF:FFFFFFFFFFFFFFFFFFFFFFFFFFFFFFFFFFFFFFFFFFFFFFFFFFFFF,F,FFFFFFFFFFFFFFFFFFFF  
@A00155:342:HHGFNDSXY:1:2675:12346:14888 1:N:0:GAACCTAG+TCCGCATA  
ACTTCTCTCGGGCCACAGCCTTACAGCTGTGGAGCACGGTATCCTCTGCCGAAACAGAGGTTGGACA  
AGACCGGAGGGGTCTCCTAGTTCCAAAGGAGATGTACTCCGGGCTTGTTACGACCTACCGTGTAAGT  
+  
FFFFFFFFFFFFFFFFFFFFFFFFFFFFFFFFFFFFFFFFFFFFFFFFFFFFFFFFFFFFFFFFFFFF  
FFFFFFFFFFFFFFFFFFFFFFFFFFFFFFFFFFFFFFFFFFFFFFFFFFFFFFFFFFFFFFFFFFFF  
@A00155:342:HHGFNDSXY:1:2675:28067:24799 1:N:0:GAACCTAG+TCCGCATA  
TGTTTTCGGCAGAGGATACCGTGCTCCACAGCTGTAAGGCTGTGGGCCCAGAGAAGTCGCTCTCTCTC  
GCCCTCTACATCCCTCTCGGCATTGAGATGACCATAGGCCAGAGGTGAGTCCTTAAGTGGACACAGCT  
+  
FFFFFFFFFFFFFFFFFFFFFFFFFFFFFFFFFFFFFFFFFFFFFFFFFFFFFFFFFFFFFFFFFFFF  
FFFFFFFFFFFFFFFFFFFFFFFFFFFFFFFFFFFFFFFFFFFFFFFFFFFFFFFFFFFFFFFFFFFF  
@A00155:342:HHGFNDSXY:1:2676:5367:8124 1:N:0:GAACCTAG+TCCGCATA  
TTCTCTCGGGCCACAGCCTTACAGCTGTGGAGCACGGTATCCTCTGCCGAAACAGAGGTTGGACAAG  
ACCGGAGGGGTCTCCTAGTTCCAAAGGAGATGTACTCCGGGCTTGTTACGACCTACCGTGTAAGTC  
+  
FFFFFFFFFFFFFFFFFFFFFFFFFFFFFFFFFFFFFFFFFFFFFFFFFFFFFFFFFFFFFFFFFFFF  
FFFFFFFFFFFF:FFFFFFFFFFFFF,FFFFFFFFFFFFFFFFFFFFFFFFFFFFFFFFFFFFFFFFFFFF,FFFFFFFFFFFF  
@A00155:342:HHGFNDSXY:1:2676:32199:21840 1:N:0:GAACCTAG+TCCGCATA  
ACCTCTGTTTCGGCAGAGGATACCGTGCTCCACAGCTGTAAGGCTGTGGGCCCAGAGAAGTCGCTCT  
CTCTCGCCCTCCACATCCCTCTCGGCATTGAGATGACCATAGGCCAGAGGTGAGTCCTTAAGTGGACA  
+  
FFFFFFFFFFFFFFFFFFFFFFFFFFFFFFFFFFFFFFFFFFFFFFFFFFFFFFFFFFFFFFFFFFFF  
FFFFFFFFFFFFFFFFFFFFFFFFFFFFFFFFFFFFFFFFFFFFFFFFFFFFFFFFFFFFFFFFFFFF,  
@A00155:342:HHGFNDSXY:1:2677:4779:5854 1:N:0:GAACCTAG+TCCGCATA  
GTGTCCACTTAAGGACTCACCTCTGGCCTATGGTCATCTCAATGCCGAGAGGGATGTGGAGGGCGAGA  
GAGAGCGACTTCTCTCGGGCCACAGCCTTACAGCTGTGGAGCACGGTATCCTCTGCCGAAACAGAGG  
+

FFFFFFFFFFFFFFFFFFFFFFFFFFFFFFFFFFFFFFFFFFFFFFFFFFFFFFFFFFFFFFFFFFFFFFFF  
FFF:FFFFFFFFFFFFFFFFFFFF,FFFF:FFF:FF:FFFF:FFFFFFFFFFFFFF:FFFFFFFFFFFF,FFF  
@A00155:342:HHGFNDSXY:1:2677:5810:7733 1:N:0:GAACCTAG+TCCGCATA  
GTGTCCACTTAAGGACTCACCTCTGGCCTATGGTCATCTCAATGCCGAGAGGGATGTGGAGGGCGAGA  
GAGAGCGACTTCTCTCGGGCCACAGCCTTACAGCTGTGGAGCACGGTATCCTCTGCCGAAACAGAGG  
+  
FFFFFFFFFFFFFFFFFFFFFFFFFFFFFFFFFFFFFFFFFFFFFFFFFFFFFFFFFFFFFFFFFFFFFF:FF  
FFFFFFFFFFFFFFFFFFFFFFFFFFFFFFFFFFFFFFFFFFFFFFFFFFFFFFFFFFFFFFFFFFFFFF:  
@A00155:342:HHGFNDSXY:1:2677:23827:17143 1:N:0:GAACCTAG+TCCGCATA  
AGCGACTTCTCTCGGGCCACAGCCTTACAGCTGTGGAGCACGGTATCCTCTGCCGAAACAGAGGTTG  
GACAAGACCGGAGGGGTCTCCTAGTTCCAAAGGAGATGTACTCCGGGCTTGTTACGACCTACCGTGT  
+  
FFFFFFFFFFFFFFFFFFFFFFFFFFFFFFFFFFFFFFFFFFFFFFFFFFFFFFFFFFFFFFFFFFFFFF:FFFFFFFFFFFFFFFFFFFFFFFFFFFFFFFF  
FFFFFFFFFFFFFFFFFFFFFFFFFFFFFFFFFFFFFFFFFFFFFFFFFFFFFFFFFFFFFFFFFFFFFF:  
@A00155:342:HHGFNDSXY:1:2677:25988:18724 1:N:0:GAACCTAG+TCCGCATA  
AGCGACTTCTCTCGGGCCACAGCCTTACAGCTGTGGAGCACGGTATCCTCTGCCGAAACAGAGGTTG  
GACAAGACCGGAGGGGTCTCCTAGTTCCAAAGGAGATGTACTCCGGGCTTGTTACGACCTACCGTGT  
+  
FFFFFFFFFFFFFFFF:FF,FFFFFFFFFFFFFFFF:FFFFFFFFFFFFFFFFFFFFFFFF,FFFFFFFFFFFFFFFF:FF  
FFFFFFFFFFFFFFFF:FFFFFFFFFFFFFFFFFFFFFFFFFFFFFFFF:FFFFFFFFFFFFFFFFFFFFFFFF  
@A00155:342:HHGFNDSXY:1:1101:25382:14262 2:N:0:GAACCTAG+TCCGCATA  
GACCCCTCCGGTCTTGTTCCAACTCTGTTTCGGCAGAGGATACCGTGCTCCACAGCTGTAAGGCTGTG  
GGCCCGAGAGAAGTCGCTCTCTCGCCCTCCACATCCCTCTCGGCATTGAGATGACCATAGGC  
+  
,FF:FFFFFFFFFFFFFFFF:FF:FFFF::FF:FF:FFFF:FF:FFFFFFFF:FFFFFF,FFF,F  
FFF:FFFFFFFF:FFFFFFFF:FFFF:FFF:FF:FFFFFFFF:FFFFFF:,FFFFFF::F  
@A00155:342:HHGFNDSXY:1:1102:6081:1376 2:N:0:GAACCTAG+TCCGCATA  
GTGAACAAGCCCGAGTACATCTCCTTTGGAAGTACAGAGACCCCTCCGGTCTTGTTCCAACTCTGTTT  
CGGCAGAGGATACCGTGCTCCACAGCTGTAAGGCTGTGGGCCCGAGAGAAGTCGCTCTCTCTCGCCCT  
+  
FFFFFFF,F:FFFFFFFFFFFFFFFFFFFFFFFFFFFFFFFFFFFFFFFFFFFFFFFFFFFFFFFF:FFFFFFFFFFFF,FFFF  
FFFFFFFFFFFFFFFFFFFFFFFFFFFFFFFFFFFFFFFFFFFFFFFFFFFFFFFFFFFFFFFFFFFFFF:FFFFFFFFFFFF  
@A00155:342:HHGFNDSXY:1:1102:10303:21840 2:N:0:GAACCTAG+TCCGCATA  
GAACAAGCCCGAGTACATCTCCTTTGGAAGTACAGAGACCCCTCCGGTCTTGTTCCAACTCTGTTTTCG  
GCAGAGGATACCGTGCTCCACAGCTGTAAGGCTGTGGGCCCGAGAGAAGTCGCTCTCTCTCGCCCTCT  
+  
FFFFFFFFFFFFFFFFFFFFFFFFFFFF,FFFFFFFFFFFFFFFFFFFFFFFFFFFFFFFFFFFFFFFF:FFF  
FFFFFFFFFFFFFFFFFFFFFFFF:FFFF:FFFFFFFFFFFFFFFFFFFFFFFF,FFFFFFFFFFFFFFFFFFFF  
@A00155:342:HHGFNDSXY:1:1103:29595:12289 2:N:0:GAACCTAG+TCCGCATA  
GCCTACTAGACTCCGACCGTCATGGGGTTCAAACCCATGCCCCACCACACCGCCTTAGATCAGCTGT  
GTCCACTTAAGGACTCACCTCTGGCCTATGGTCATCTCAATGCCGAGAGGGATGTGGAGGGCGAGAGA  
+  
FFFFFFFFFFFF:FFFFFFFFFFFFFFFFFFFFFFFFFFFFFFFFFFFFFFFFFFFFFFFFFFFFFFFF:FFFF  
FFFFFFFFFFFF:FFFFFF:FFFFFFFFFFFFFFFFFFFFFFFFFFFFFFFFFFFFFFFFFFFFFFFFFFFF  
@A00155:342:HHGFNDSXY:1:1103:8929:19492 2:N:0:GAACCTAG+TCCGCATA  
GTCGTGAACAAGCCCGAGTACATCTCCTTTGGAAGTACAGAGACCCCTCCGGTCTTGTTCCAACTCTG  
TTTCGGCAGAGGATACCGTGCTCCACAGCTGTAAGGCTGTGGGCCCGAGAGAAGTCGCTCTCTCTCGC  
+  
FFFFFFFFFFFFFFFFFFFFFFFFFFFFFFFF:FFFFFFFFFFFFFFFFFFFFFFFFFFFFFFFFFFFFFFFF  
FFFFFFFFFFFFFFFFFFFFFFFFFFFFFFFFFFFFFFFFFFFFFFFFFFFFFFFFFFFFFFFFFFFFFF:  
@A00155:342:HHGFNDSXY:1:1103:27715:28792 2:N:0:GAACCTAG+TCCGCATA  
CCTACTAGACTACGACTTACACGGTAGGTCGTGAACAAGCCCGAGTACATCTCCTTTGGAAGTACGA  
GACCCCTCCGGTCTTGTTCCAACTCTGTTTCGGCAGAGGATACCGTGCTCCACAGCTGTAAGGCTGTG  
+

```
FFFFFFFFFFFFFFFFFFFFFFFFFFFFFFFFFFFFFFFFFFFFFFFFFFFFFFFFFFFFFFFFFFFFFFFFF:FFFFFFF  
FFFFFFFFFFFFFFFFFFFF,FFFFFFFFFFFFFFFFFFFFFFFFFFFFFFFFFFFFFFFFFFFFFFFFFFFFFFFFFFFFF  
@A00155:342:HHGFNDSXY:1:1104:7545:6198 2:N:0:GAACCTAG+TCCGCATA  
ACTAGACTACGACTTACACGGTAGGTTCGTGAACAAGCCCCGGAGTACATCTCCTTTGGAACCAGGAGAC  
CCCTCCGGTCTTGTC AACCTCTGTTTTCGGCAGAGGATACCGTGCTCCACAGCTGTAAGGCTGTGGGC  
+  
FFFFFFFFFFFFFFFFFFFFFFFFFFFFFFFFFFFFFFFFFFFFFFFFFFFFFFFFFFFFFFFFFFFFFFFF:FFFFFFF  
FFFFFFFFFFFFFFFFFFFFFFFFFFFFFFFFFFFFFFFFFFFFFFFFFFFFFFFFFFFFFFFFFFFFFFFF:FFFFFFF  
@A00155:342:HHGFNDSXY:1:1104:27769:31735 2:N:0:GAACCTAG+TCCGCATA  
GGAGTACATCTCCTTTGGA ACTAGGAGACCCCTCCGGTCTTGTC AACCTCTGTTTTCGGCAGAGGATA  
CCGTGCTCCACAGCTGTAAGGCTGTGGGCCCGAGAGAAGTCGCTCTCTCTCGCCCTCTACATCCCTCT  
+  
FFFFFFFFFFFFFFFFFFFFFFFFFFFFFFFFFFFFFFFFFFFFFFFFFFFFFFFFFFFFFFFFFFFFFFFF:FFFFFFF  
FFFFFFFFFFFFFFFFFFFFFFFFFFFFFFFFFFFFFFFFFFFFFFFFFFFFFFFFFFFFFFFFFFFFFFFF:FFFFFFF  
@A00155:342:HHGFNDSXY:1:1105:30517:6778 2:N:0:GAACCTAG+TCCGCATA  
AAAAGGACTCGTCAGGTAGCCTACTAGACTACGACTTACACGGTAGGTTCGTGAACAAGCCCCGGAGTAC  
ATCTCCTTTGGA ACTAGGAGACCCCTCCGGTCTTGTC AACCTCTGTTTTCGGCAGAGGATACCGTGCT  
+  
FFFFFFFFFFFFFFFFFFFFFFFFFFFFFFFFFFFFFFFFFFFFFFFFFFFFFFFFFFFFFFFFFFFFFFFF:FFFFFFF  
FFFFFFFFFFFFFFFFFFFFFFFFFFFFFFFFFFFFFFFFFFFFFFFFFFFFFFFFFFFFFFFFFFFFFFFF:FFFFFFF  
@A00155:342:HHGFNDSXY:1:1105:2257:19366 2:N:0:GAACCTAG+TCCGCATA  
ACACCGCCTTAGATCAGCTGTGTCCACTTAAGGACTCACCTCTGGCCTATGGTCATCTCAATGCCGAG  
AGGGATGTGAAGGGCGAGAGAGAGCGACTTCTCTCGGGCCCACAGCCTTACAGCTGTGGAGCACGGTA  
+  
FFFFFFFFFFFFFFFFFFFFFFFFFFFFFFFFFFFFFFFFFFFFFFFFFFFFFFFFFFFFFFFFFFFFFFFF:FFFFFFF  
FFFFFFFFFFFFFFFFFFFFFFFFFFFFFFFFFFFFFFFFFFFFFFFFFFFFFFFFFFFFFFFFFFFFFFFF:FFFFFFF,  
FFFFFFFFFFFFFFFFFFFFFFFFFFFFFFFFFFFFFFFFFFFFFFFFFFFFFFFFFFFFFFFFFFFFFFFF:F:  
@A00155:342:HHGFNDSXY:1:1105:32922:33739 2:N:0:GAACCTAG+TCCGCATA  
AAACTTACACA AACTCGAAGAGTAACGACGGTTTCGTCTTGGAACGGACTCATCAGGGAGCCTACTAG  
ACTCCGACCGTCATGGGGGTTCAAACCCATGCCCGCCACACCGCCTTAGATCAGCTGTGTCTACTTA  
+  
FF:FFFFFFFFFFFFFFFFFFFFFFFFFFFFFFFFFFFFFFFFFFFFFFFFFFFFFFFFFFFFFFFFFFFFFFFF,F:  
FFFFFFFFFFFFFFFFFFFFFFFFFFFFFFFFFFFFFFFFFFFFFFFFFFFFFFFFFFFFFFFFFFFFFFFF:F,  
@A00155:342:HHGFNDSXY:1:1106:31919:20384 2:N:0:GAACCTAG+TCCGCATA  
GTCTTGTC AACCTCTGTTTTCGGCAGAGGATACCGTGCTCCACAGCTGTAAGGCTGTGGGCCCGAGAG  
AAGTCGCTCTCTCTCGCCCTCCACATCCCTCTCGGCATTGAGATGACCATAGGCCAGGG  
+  
FFF:F:FFFFFFFFFFFFFFFFFFFFFFFFFFFFFFFFFFFFFFFFFFFFFFFFFFFFFFFFFFFFFFFF:FFF,  
FFFFFFFFFFFFFFFFFFFFFFFFFFFFFFFFFFFFFFFFFFFFFFFFFFFFFFFFFFFFFFFFFFFFFFFF:FFF,  
@A00155:342:HHGFNDSXY:1:1106:32850:23062 2:N:0:GAACCTAG+TCCGCATA  
CCTACTAGACTACGACTTACACGGTAGGTTCGTGAACAAGCCCCGGAGTACATCTCCTTTGGA ACTAGGA  
GACCCCTCCGGTCTTGTC AACCTCTGTTTTCGGCAGAGGATACCGTGCTCCACAGCTGTAAGGCTGTG  
+  
FFFFFFFFFFFFFFFFFFFFFFFFFFFFFFFFFFFFFFFFFFFFFFFFFFFFFFFFFFFFFFFFFFFFFFFF:FFFFFFF  
FFFFFFFFFFFFFFFFFFFFFFFFFFFFFFFFFFFFFFFFFFFFFFFFFFFFFFFFFFFFFFFFFFFFFFFF:FFF  
@A00155:342:HHGFNDSXY:1:1106:7636:27148 2:N:0:GAACCTAG+TCCGCATA  
TTACACGGTAGGTTCGTGAACAAGCCCCGGAGTACATCTCCTTTGGA ACTAGGAGACCCCTCCGGTCTTG  
TCCAACCTCTGTTTTCGGCAGAGGATACCGTGCTCCACAGCTGTAAGGCTGTGGGCCCGAGAGAAGTCG  
+  
:FFFFFFFFFFFFFFFFFFFFFFFFFFFFFFFFFFFFFFFFFFFFFFFFFFFFFFFFFFFFFFFFFFFFFFFF:FFFFFFF  
FFFFFFFFFFFFFFFFFFFFFFFFFFFFFFFFFFFFFFFFFFFFFFFFFFFFFFFFFFFFFFFFFFFFFFFF:FFF  
@A00155:342:HHGFNDSXY:1:1106:12554:28369 2:N:0:GAACCTAG+TCCGCATA  
CCGTTCCAAGGACGAAACCGTCGTTACTCTTTGAGTTGTGTAAGTTTCGTCCTAAAAAGGACTCGTCA  
GGTAGCCTACTAGACTACGACTTACACGGTAGGTTCGTGAACAAGCCCCGGAGTACATCTCCTTTGGA
```

FFF:FFFFFFFFFFFFFFFF:FFFFFFFFFF:FFF:FF,FF:FFF,FFFFFFFFFFFFFFFFFFFFFFFF  
FFFFFFFFFFFFFFFFFFFFFFFFFFFFFFFFFFFFFFFFFFFFFFFFFFFFFFFFFFFFFFFF:FF  
@A00155:342:HHGFNDSXY:1:1107:26775:8124 2:N:0:GAACCTAG+TCCGCATA  
CGGTTTCGTCCTTGGAACGGACTCATCAGGGAGCCTACTAGACTCCGACCGTCATGGGGGTTCAAACC  
CATGCCCCGCTACACCGCCTTAGATCAGCTGTGTCCACTTAAGGACTCACCTCTGGCCTATGGTCATC  
+  
FFFFFFFFFFFF:FFFFFFFFFFFFFFFFFFFFFFFFFFFFFFFF,FFFFFFFFFFFFFFFFFFFFFFFF  
FF:FFFFFFFFFFFFFFFFFFFFFFFFFFFFFFFFFFFFFFFFFFFFFFFFFFFFFFFFFFFFFFFF  
@A00155:342:HHGFNDSXY:1:1107:19913:21762 2:N:0:GAACCTAG+TCCGCATA  
TACACGGTAGGTCGTGAACAAGCCCGGAGTACATCTCCTTTGGAAGTACAGAGACCCCTCCGGTCTTGT  
CCAACCTCTGTTTCGGCAGAGGATACCGTGCTCCACAGCTGTAAGGCTGTGGGCCCGAGAGAAGTCGC  
+  
FFFFFFFFFFFFFFFFFFFFFFFFFFFFFFFFFFFFFFFFFFFFFFFFFFFFFFFFFFFFFFFF  
FFFFFFFFFFFFFFFFFFFFFFFFFFFFFFFFFFFFFFFFFFFFFFFFFFFFFFFFFFFFFFFF  
@A00155:342:HHGFNDSXY:1:1108:22299:2691 2:N:0:GAACCTAG+TCCGCATA  
GGTCGTGAACAAGCCCGGAGTACATCTCCTTTGGAAGTACAGAGACCCCTCCGGTCTTGTCCAACCTCT  
GTTTCGGCAGAGGATACCGTGCTCCACAGCTGTAAGGCTGTGGGCCCGAGAGAAGTCGCTCTCTCTCG  
+  
FFFFFFFFFFFFFFFFFFFFFFFFFFFFFFFFFFFFFFFFFFFFFFFFFFFFFFFFFFFFFFFF:FFFFFFF  
FFFFFFFFFFFFFFFF:FFFFFFFFFFFFFFFFFFFFFFFF,FFFFFFFFFFFFFFFFFFFFFFFF:FF  
@A00155:342:HHGFNDSXY:1:1108:23068:12007 2:N:0:GAACCTAG+TCCGCATA  
GGACTCGTCAGGTAGCCTACTAGACTACGACTTACACGGTAGGTCGTGAACAAGCCCGGAGTACATCT  
CCTTTGGAAGTACAGAGACCCCTCCGGTCTTGTCCAACCTCTGTTTCGGCAGAGGATACCGTGCTCCAC  
+  
FFFFFFFFFFFFFFFFFFFFFFFFFFFFFFFF:FFFFFFFFFFFFFFFFFFFFFFFF:FFFFFFFFFFFF  
FFFFFFFFFFFFFFFFFFFFFFFFFFFFFFFFFFFFFFFFFFFFFFFFFFFFFFFF:FFFFFFFF:FFFFFF:FFFFF  
@A00155:342:HHGFNDSXY:1:1108:2718:21449 2:N:0:GAACCTAG+TCCGCATA  
GAAACCGTCATTACTCTTCGAGTTGTGTAAGTTTCGTCCTAAAAAGGACTCGTCAGGTAGCCTACTAG  
ACTACGACTTACACGGTAGGTCGTGAACAAGCCCGGAGTACATCTCCTTTGGAAGTACAGAGACCCCTC  
+  
FFF:FF,FFFFF,F:FFFF:FFFFFFFFFFFFFFFF:FF,FFFFFFFFFFFFFFFFFFFFFFFF:FFFFFFFF  
FFFFFFFFFFFF,FFFFF,FFFF:FFFFFFFFFFFFFFFFFFFFFFFFFFFFFFFF,FFFFF,FFFF,,FF  
@A00155:342:HHGFNDSXY:1:1109:19370:2628 2:N:0:GAACCTAG+TCCGCATA  
AGCCTACTAGACTACGACTTACACGGTAGGTCGTGAACAAGCCCGGAGTACATCTCCTTTGGAAGTAC  
GAGACCCCTCCGGTCTTGTCCAACCTATGTTTCGGCAGAGGATACCGTGCTCCACAGCTGTAAGGCTG  
+  
FFFFFFFFFFFFFFFFFFFFFFFFFFFFFFFFFFFFFFFFFFFFFFFFFFFFFFFFFFFFFFFF  
FFFFFFFFFFFFFFFFFFFFFFFFFFFFFFFF:FFFFFFFFFFFFFFFFFFFFFFFF:FFFFF  
@A00155:342:HHGFNDSXY:1:1109:21549:7811 2:N:0:GAACCTAG+TCCGCATA  
CCCCTCCGGTCTTGTCCAACCTCTGTTTCGGCAGAGGATACCGTGCTCCACAGCTGTAAGGCTGTGGG  
CCCGAGAGAAGTCGCTCTCTCTCGCCCTTCACATCCCTCTCGGCATTGAGATGACCATAG  
+  
F:FFFFFFFFFFFFFFFFFFFFFFFFFFFFFFFFFFFFFFFFFFFFFFFFFFFFFFFFFFFFFFFF  
FFFFFFFFFFFFFFFFFFFFFFFFFFFFFFFFFFFFFFFFFFFFFFFFFFFFFFFF:FFF  
@A00155:342:HHGFNDSXY:1:1109:16161:24220 2:N:0:GAACCTAG+TCCGCATA  
GTGTAAGTTTCGTCCTAAAAAGGACTCGTCAGGTAGCCTACTAGACTACGACTTACACGGTAGGTCGT  
GAACAAGCCCGGAGTACATCTCCTTTGGAAGTACAGAGACCCCTCCGGTCTTGTCCAACCTCTGTTTCG  
+  
FFFFFFFFFFFFFFFFFFFFFFFF:FFFFFFFFFFFFFFFFFFFFFFFFFFFFFFFFFFFFFFFF  
FFFFF,FFFFFFFFFFFFFFFFFFFFFFFFFFFFFFFFFFFFFFFFFFFFFFFFFFFFFFFF  
@A00155:342:HHGFNDSXY:1:1109:16595:28729 2:N:0:GAACCTAG+TCCGCATA  
GACTCGTCAGGTAGCCTACTAGACTACGACTTACACGGTAGGTCGTGAACAAGCCCGGAGTACATCTC  
CTTTGGAAGTACAGAGACCCCTCCGGTCTTGTCCAACCTCTGTTTCGGCAGAGGATACCGTGCTCCACA  
+

FFFFFFFF,FFFFFFFFFFFFFFFFFFFFFFFFFFFFFFFFFFFFFFFFFFFFFFFFFFFFFFFFFFFFFFFF  
F:FFFFFFFFFFFFFFFFFFFFFFFFFFFFFFFFFFFFFFFFFFFFFFFFFFFFFFFFFFFFFFFFFFFFFFFF  
@A00155:342:HHGFNDSXY:1:1110:16658:5196 2:N:0:GAACCTAG+TCCGCATA  
TCCTCTGCCGAAACAGAGGTTGGACAAGACCGGAGGGGTCTCCTAGTTCCAAAGGAGATGTACTCCGG  
GCTTGTTACAGACCTACCGTGTAAGTCGTAGTCTAGTAGGCTACCTGACGAGTCCTTTTTAGGACGAA  
+  
FFFFFFFFFFFFFFFFFFFFFFFFFFFFFFFFFFFFFFFFFFFFFFFFFFFFFFFFFFFFFFFFFFFFFFFF  
FFFFFFFFFFFFFFFFFFFFFFFFFFFFFFFFFFFFFFFFFFFFFFFFFFFFFFFFFFFFFFFFFFFFFFFF  
@A00155:342:HHGFNDSXY:1:1110:12771:36699 2:N:0:GAACCTAG+TCCGCATA  
AGTTGTGTAAGTTTCGTCCTAAAAAGGACTCGTCAGGTAGCCTACTAGACTACGACTTACACGGTAGG  
TCGTGAACAAGCCCGGAGTACATCTCCTTTGGAAGTACTAGGAGACCCCTCCGGTCTTGTCCAACCTCTGT  
+  
FFFFFFFFFFFFFFFF:FFFFFFFFFFFFFFFF:FFFFFFFFFFFF:FFFFFFFFFFFFFFFFFFFFFFFF  
FFF:FFFFFFFF:FFFFFFFFFFFF:FFFFFF:FF:FFFF:FFFF:FF:F:FFFFFFFFFFFFFFFFFFFF  
@A00155:342:HHGFNDSXY:1:1111:18810:2785 2:N:0:GAACCTAG+TCCGCATA  
AGCCCGGAGTACATCTCCTTTGGAAGTACTAGGAGACCCCTCCGGTCTTGTCCAACCTCTGTTTCGGCAGA  
GGATACCGTGCTCCACAGCTGTAAGGCTGTGGGCCCGAGAGAAGTCGCTCTCTCTCGCCCTC  
+  
FFFFFFFFFFFFFFFFFFFFFFFFFFFFFFFFFFFFFFFFFFFFFFFFFFFFFFFFFFFFFFFFFFFFFFFF  
FFFFFFFFFFFFFFFFFFFFFFFFFFFFFFFFFFFFFFFFFFFFFFFFFFFFFFFFFFFFFFFFFFFFFFFF  
@A00155:342:HHGFNDSXY:1:1111:4996:10238 2:N:0:GAACCTAG+TCCGCATA  
CTGGCCTATGGTCATCTCAATGCCGAGAGGGATGTGAAGGGCGAGAGAGAGCGACTTCTCTCGGGCCC  
ACAGCCTTACAGCTGTGGAGCACGGTATCCTCTGCCGAAACAGAGGTTGGACAAGACCGG  
+  
FFFFFFFFFFFFFFFFFFFF:FFFFFFFFFFFF:FFFFFFF:FFFFFFFFFFFFFFFFFFFF:FFFFFFF:FFFFFFFFFFFF  
FFFFFFFFFFFFFFFFFFFFFFFFFFFFFFFFFFFF:FF,FFFFF:FFFFFFFFFFFFFFFFFFFF,FFFFFFF  
@A00155:342:HHGFNDSXY:1:1111:11026:15796 2:N:0:GAACCTAG+TCCGCATA  
TCTTGTCCAACCTCTGTTTCGGCAGAGGATACCGTGCTCCACAGCTGTAAGGCTGTGGGCCCGAGAGA  
AGTCGCTCTCTCTCGCCCTCCACATCCCTCTCGGCATTGAGATGACCATAGGCCAGAGGAGAGTCCTT  
+  
FFF,FFFFFFFFFFFFFFFFFFFFFFFFFFFFFFFFFFFFFFFFFFFFFFFFFFFFFFFFFFFFFFFFFFFF  
FFFFFFFFFFFFFFFFFFFFFFFFFFFFFFFFFFFFFFFFFFFFFFFFFFFFFFFFFFFFFFFFFFFFFFFFFFFF  
@A00155:342:HHGFNDSXY:1:1111:26892:22294 2:N:0:GAACCTAG+TCCGCATA  
CGGCAGAGGATACCGTGCTCCACAGCTGTAAGGCTGTGGGCCCGAGAGAAGTCGCTCTCTCTCGCCCT  
TCACATCCCTCTCGGCATTGAGATGACCATAGGCCAGAGGTGAGTCCTTAAGTGGACACAGCTGATCT  
+  
FFFFFFFFFFFFFFFFFFFFFFFFFFFFFFFFFFFFFFFFFFFF:FFFFFFFFFFFFFFFFFFFF:FFFFFFFFFFFFFFFFFFFF  
FFFFFFFFFFFFFFFFFFFFFFFFFFFFFFFFFFFFFFFFFFFFFFFFFFFFFFFFFFFFFFFFFFFF:FFFFFFFFFFFFFFFFFFFF  
@A00155:342:HHGFNDSXY:1:1111:30553:24565 2:N:0:GAACCTAG+TCCGCATA  
GAAACCGTCGTTACTCTTTGAGTTGTGTAAGTTTCGTCCTAAAAAGGACTCGTCAGGTAGCCTACTAG  
ACTACGACTTACACGGTAGGTCTGTAACAAGCCCGGAGTACATCTCCTTTGGAAGTACTAGGAGACCCCTC  
+  
FFFFFFFFFFFFFFFFFFFF,:FFFFFFFFFFFFFFFFFFFFFFFFFFFFFFFFFFFFFFFFFFFFFFFFFFFF  
FFFFFFFFFFFFFFFFFFFFFFFFFFFFFFFFFFFFFFFFFFFF:FFFFFFFFFFFFFFFFFFFFFFFFFFFF  
@A00155:342:HHGFNDSXY:1:1112:4670:5791 2:N:0:GAACCTAG+TCCGCATA  
TCGTGAACAAGCCCGGAGTACATCTCCTTTGGAAGTACTAGGAGACCCCTCCGGTCTTGTCCAACCTCTGT  
TTCGGCAGAGGATACCGTGCTCCACAGCTGTAAGGCTGTGGGCCCGAGAGAAGTCGCTCTCTCTCGCC  
+  
FFFFFFFFFFFFFF,FFFFFFFFFFFFFFFFFFFFFFFFFFFFFFFFFFFFFFFFFFFFFFFFFFFFFFFF,FFFF  
FFFFFFFFFFFFFFFFFFFFFFFFFFFFFFFFFFFFFFFFFFFF:F,FFFF,FFFFFFFFFFFFFFFFFFFFFFFF:F  
@A00155:342:HHGFNDSXY:1:1112:16595:8500 2:N:0:GAACCTAG+TCCGCATA  
TGAACAAGCCCGGAGTACATCTCCTTTGGAAGTACTAGGAGACCCCTCCGGTCTTGTCCAACCTCTGTTTC  
GGCAGAGGATACCGTGCTCCACAGCTGTAAGGCTGTGGGCCCGAGAGAAGTCGCTCTCTCTCGCC  
+

FFFFFFFFFFFFFFFFFFFFFFFFFFFFFFFFFFFFFFFFFFFFFFFFFFFFFFFFFFFFFFFFFFFFFFFFFFFFFFFF  
:FFFFFFFFFFFFFFFFFFFFFFFFFFFFFFFFFFFFFFFFFFFFFFFFFFFFFFFFFFFFFFFFFFFFFFFFFFFFFFFF  
@A00155:342:HHGFNDSXY:1:1112:8757:21324 2:N:0:GAACCTAG+TCCGCATA  
CCTACTAGACTACGACTTACACGGTAGGTCGTGAACAAGCCCGAGTACATCTCCTTTGGAACCAGGA  
GACCCCTCCGGTCTTGTCCAACCTCTGTTTCGGCAGAGGATACCGTGCTCCACAGCTGTAAGGCTGTG  
+  
FFFFFFFFFFFFFFFFFFFFFFFFFFFFFFFFFFFFFFFFFFFFFFFFFFFFFFFFFFFFFFFFFFFFFFFFFFFFFFFF  
FFFFFFFFFFFFFFFFFFFFFFFFFFFFFFFFFFFFFFFFFFFFFFFFFFFFFFFFFFFFFFFFFFFFFFFFFFFFFFFF  
@A00155:342:HHGFNDSXY:1:1112:25220:21746 2:N:0:GAACCTAG+TCCGCATA  
AGTACATCTCCTTTGGAAGTAGGAGACCCCTCCGGTCTTGTCCAACCTCTGTTTCGGCAGAGGATACC  
GTGCTCCACAGCTGTAAGGCTGTGGGCCCGAGAGAAGTCGCTCTCTCTCGCCCTCCACATCCCTCTCG  
+  
FFFFF:FFFFFFFFFFFFFFFF:FFFFFFFFFFFFFFFF:FFFFFFFFFFFFFFFF:FFF  
FFFFFFFFFFFFFFFF:FFFF:,FFFFFFFFFFFFFFFF:FFFFFFFFFFFF:F:FFFFFFFF:FFFFFFFF:FF  
@A00155:342:HHGFNDSXY:1:1112:16477:25238 2:N:0:GAACCTAG+TCCGCATA  
TCGGCAGAGGATACCGTGCTCCACAGCTGTAAGGCTGTGGGCCCGAGAGAAGTCGCTCTCTCTCGCCC  
TTCACATCCCTCTCGGCATTGAGATGACCATAGGCCAGAGGTGAGTCCTTAAGTGGACACA  
+  
FFFFFFFFFFFFFFFFFFFFFFFFFFFFFFFFFFFFFFFFFFFFFFFFFFFFFFFFFFFFFFFFFFFFFFFFFFFFFFFF  
FFFFFFFFFFFFFFFFFFFFFFFFFFFFFFFFFFFFFFFFFFFFFFFFFFFFFFFFFFFFFFFFFFFFFFFFFFFFFFFF  
@A00155:342:HHGFNDSXY:1:1113:20609:25567 2:N:0:GAACCTAG+TCCGCATA  
CGGTTTCGTCCTTGGAACGGAATCATCAGGGAGCCTACTAGACTCCGACCGTCATGGGGGTTCAAACC  
CATGCCCCGCTACACCGCCTTAGATCAGCTGTGTCCACTTAAGGACTCACCTCTGGCCTATGGTCATC  
+  
FFFFFFFFF,FFFFFFFFFFFFFFFFFFFFFFFFFFFFFFFFFFFFFFFFFFFFFFFFFFFFFFFFFFFFFFFFFFFF  
FFFFFFFFFFFFFFFFFFFFFFFFFFFFFFFFFFFFFFFFFFFFFFFFFFFFFFFFFFFFFFFFFFFFFFFFFFFFFFFF  
@A00155:342:HHGFNDSXY:1:1113:17345:28150 2:N:0:GAACCTAG+TCCGCATA  
GTTACTCTTCGAGTTGTGTAAGTTTCGTCCTAAAAAGGACTCGTCAGGTAGCCTACTAGACTACGACT  
TACACGGTAGGTCGTGAACAAGCCCGAGTACATCTCCTTTGGAAGTAGGAGACCCCTCCGGTCTTGT  
+  
FFFFFFFFFFFFFFFFFFFFFFFFFFFFFFFFFFFFFFFFFFFFFFFFFFFFFFFFFFFFFFFFFFFFFFFFFFFF  
FFFFFFFFFFFFFFFFFFFFFFFFFFFFFFFFFFFFFFFFFFFFFFFFFFFFFFFFFFFFFFFFFFFFFFFFFFFF  
@A00155:342:HHGFNDSXY:1:1114:15646:16000 2:N:0:GAACCTAG+TCCGCATA  
GTAGCCTACTAGACTACGACTTACACGGTAGGTCGTGAACAAGCCCGAGTACATCTCCTTTGGAACC  
AGGAGACCCCTCCGGTCTTGTCCAACCTCTGTTTCGGCAGAGGATACCGTGCTCCACAGCTGTAAGG  
+  
FFFFFFFFFFFFFFFFFFFFFFFFFFFFFFFFFFFFFFFFFFFFFFFFFFFFFFFFFFFFFFFFFFFFFFFFFFFF  
FFFFFFFFFFFFFFFFFFFFFFFFFFFFFFFFFFFFFFFFFFFFFFFFFFFFFFFFFFFFFFFFFFFFFFFFFFFF  
@A00155:342:HHGFNDSXY:1:1114:25021:21371 2:N:0:GAACCTAG+TCCGCATA  
TCCACTTAAGGACTCACCTCTGGCCTATGGTCATCTCAATGCCGAGAGGGATGTAGAGGGCGAGAGAG  
AGCGACTTCTCTCGGGCCACAGCCTTACAGCTGTGGAGCACGGTATCCTCTGCCGAAACAGAGGTTG  
+  
FFFFFFFFFFFFFFFFFFFFFFFFFFFFFFFFFFFFFFFFFFFFFFFFFFFFFFFFFFFFFFFFFFFFFFFFFFFF  
,FFFFFFFFFFFFFFFFFFFFFFFFFFFFFFFFFFFFFFFFFFFFFFFFFFFFFFFFFFFFFFFFFFFFFFFFFFFF  
@A00155:342:HHGFNDSXY:1:1115:7229:21527 2:N:0:GAACCTAG+TCCGCATA  
AGGACGAACTTACACAACCTCGAAGAGTAACGACGGTTTCGTCCTTGGAACGGAATCATCAGGGAGCC  
TACTAGACTCCGACCGTCATGGGGGTTCAAACCCATGCCCCGCTACACCGCCTTAGATCAGCTGTGTC  
+  
FFFFFFFFFFFFFFFFFFFFFFFFFFFFFFFFFFFFFFFFFFFFFFFFFFFFFFFFFFFFFFFFFFFFFFFFFFFF  
FFFFFFFFF:FFFFFFFFFFFFFFFFFFFFFFFFFFFFFFFFFFFFFFFFFFFFFFFFFFFFFFFFFFFFFFFFFFFF  
@A00155:342:HHGFNDSXY:1:1115:17463:34992 2:N:0:GAACCTAG+TCCGCATA  
GGTCTTGTCCAACCTCTGTTTCGGCAGAGGATACCGTGCTCCACAGCTGTAAGGCTGTGGGCCCGAGA  
GAAGTCGCTCTCTCTCGCCCTCCACATCCCTCTCGGCATTGAGATGACCATAGGCCAGAGGAG  
+



[illegible]

FFFFFFFFFFFFFFFFFFFFFFFFFFFFFFFFFFFFFFFFFFFFFFFFFFFFFFFFFFFFFFFFFFFFFFFF  
FFFFFFFFFFFFFFFFFFFFFFFFFFFFFFFFFFFFFFFFFFFFFFFFFFFFFFFFFFFFFFFFFFFFFFFF  
@A00155:342:HHGFNDSXY:1:1120:11505:7764 2:N:0:GAACCTAG+TCCGCATA  
GCCACAGCCTTACAGCTGTGGAGCACGGTATCCTCTGCCGAAACAGAGGTTGGACAAGACCGGAGGG  
GTCTCCTAGTTCCAAAGGAGATGTACTCCGGGCTTGTTACGACCTACCGTGTAAGTCGTAGTCTAGT  
+  
FFFFFFFFFFFFFFFFFFFFFFFFFFFFFFFFFFFFFFFFFFFFFFFFFFFFFFFFFFFFFFFFFFFFFFFF,FF  
FFFFFFFFFFFFFFFFFFFFFFFFFFFFFFFFFFFFFFFFFFFFFFFFFFFFFFFFFFFFFFFFFFFFFFFF  
@A00155:342:HHGFNDSXY:1:1120:15139:15405 2:N:0:GAACCTAG+TCCGCATA  
GTTTCGTCTCTAAAAGGACTCGTCAGGTAGCCTACTAGACTACGACTTACACGGTAGGTCTGTAACAA  
GCCCGGAGTACATCTCCTTTGGAAGTACGAGACCCCTCCGGTCTTGTTCAACCTCTGTTTCGGCAGAG  
+  
FFFFFFFFFFFFFFFFFFFFFFFFFFFFFFFFFFFFFFFFFFFFFFFFFFFFFFFFFFFFFFFFFFFFFFFF  
FFFFFFFFFFFFFFFFFFFFFFFFFFFFFFFFFFFFFFFFFFFFFFFFFFFFFFFFFFFFFFFFFFFFFFFF  
@A00155:342:HHGFNDSXY:1:1120:18575:18004 2:N:0:GAACCTAG+TCCGCATA  
ACTAGACTACGACTTACACGGTAGGTCTGTAACAAGCCCGGAGTACATCTCCTTTGGAACCGAGAGAC  
CCCTCCGGTCTTGTTCAACCTCTGTTTCGGCAGAGGATACCGTGCTCCACAGCTGTAAGGCTGTGGGC  
+  
FFFFFFFFFFFFFFFFFFFFFFFFFFFFFFFFFFFFFFFFFFFFFFFFFFFFFFFFFFFFFFFFFFFFFFFF,FFFFFFFFFFFFFFFFFFFFFFFF  
FFFFFFFFFFFFFFFFFFFFFFFFFFFFFFFFFFFFFFFFFFFFFFFFFFFFFFFFFFFFFFFFFFFFFFFF  
@A00155:342:HHGFNDSXY:1:1120:24144:28494 2:N:0:GAACCTAG+TCCGCATA  
GTGAACAAGCCCGGAGTACATCTCCTTTGGAAGTACGAGACCCCTCCGGTCTTGTTCAACCTCTGTTT  
CGGCAGAGGATACCGTGCTCCACAGCTGTAAGGCTGTGGGCCCGAGAGAAGTCGCTCTCTCTCGCCCT  
+  
FFFFFFFFFFFFFFFFFFFFFFFFFFFFFFFFFFFFFFFFFFFFFFFFFFFFFFFFFFFFFFFFFFFFFFFF,FFFFFFFFFFFFFFFFFFFFFFFF  
FFFFFFFFFFFFFFFFFFFFFFFFFFFFFFFFFFFFFFFFFFFFFFFFFFFFFFFFFFFFFFFFFFFFFFFF  
@A00155:342:HHGFNDSXY:1:1120:29197:32268 2:N:0:GAACCTAG+TCCGCATA  
CAGCTGTGTCCACTTAAGGACTCACCTCTGGCCTATGGTCATCTCAATGCCGAGAGGGATGTGAAGGG  
CGAGAGAGAGCGACTTCTCTCGGGCCACAGCCTTACAGCTGTGGAGCACGGTATCCTCTGCCGAAAC  
+  
FFFFFFFFFFFFFFFFFFFFFFFFFFFFFFFFFFFFFFFFFFFFFFFFFFFFFFFFFFFFFFFFFFFFFFFF:FFFFFFFFFFFFFFFFFFFFFFFF  
FFFFFFFFFFFFFFFFFFFFFFFFFFFFFFFFFFFFFFFFFFFFFFFFFFFFFFFFFFFFFFFFFFFFFFFF  
@A00155:342:HHGFNDSXY:1:1120:6985:33661 2:N:0:GAACCTAG+TCCGCATA  
GAGACCCCTCCGGTCTTGTTCAACCTCTGTTTCGGCAGAGGATACCGTGCTCCACAGCTGTAAGGCTG  
TGGGCCCGAGAGAAGTCGCTCTCTCTCGCCCTCCACATCCCTCTCGGCATTGAGATGAC  
+  
FFFFFFFFFFFFFFFFFFFFFFFFFFFFFFFFFFFFFFFFFFFFFFFFFFFFFFFFFFFFFFFFFFFFFFFF,F  
FFFFFFFFFFFFFFFFFFFFFFFFFFFFFFFFFFFFFFFFFFFFFFFFFFFFFFFFFFFFFFFFFFFFFFFF  
@A00155:342:HHGFNDSXY:1:1121:32967:15499 2:N:0:GAACCTAG+TCCGCATA  
GAGTAACGACGGTTTCGTCTTGGAACGGACTCATCAGGGAGCCTACTAGACTCCGACCGTCATGGGG  
GTTCAAACCCATGCCCCACCACACCGCCTTAGATCAGCTGTGTCCACTTAAGGACTCACCTCTGGCCT  
+  
FFFFFFFFFFFFFFFFFFFFFFFFFFFFFFFFFFFFFFFFFFFFFFFFFFFFFFFFFFFFFFFFFFFFFFFF:FFFFFFFFFFFFFFFF  
FFFFFFFFFFFFFFFFFFFFFFFFFFFFFFFFFFFFFFFFFFFFFFFFFFFFFFFFFFFFFFFFFFFFFFFF,FFFFF:F:FFFF:FFFFFFFF  
@A00155:342:HHGFNDSXY:1:1121:1217:27649 2:N:0:GAACCTAG+TCCGCATA  
GGACTCGTCAGGTAGCCTACTAGACTACGACTTACACGGTAGGTCTGTAACAAGCCCGGAGTACATCT  
CCTTTGGAAGTACGAGACCCCTCCGGTCTTGTTCAACCTCTGTTTCGGCAGAGGATACCGTGCTCCAC  
+  
FF,FFFFF:FFFFFFFF:FFFFFFFF:FFFFFF,FFFFFFFFFFFFFFFFFFFFFFFF:FFFFF::FF,FFFF  
FFF:FFF,,FF:FFFF:FFFFFFFFFFFFFFFF:::,FFFF:F:FFFFFF,FFFFFF:FFFFFFFF  
@A00155:342:HHGFNDSXY:1:1122:20609:7341 2:N:0:GAACCTAG+TCCGCATA  
ACACCGCCTTAGATCAGCTGTGTCCACTTAAGGACTCACCTCTGGCCTATGGTCATCTCAATGCCGAG  
AGGGATGTGAAGGGCGAGAGAGAGCGACTTCTCTCGGGCCACAGCCTTACAGCTGTGGAGCACGGTA  
+

[illegible]

FFFFFFFFFFFFFFFFFFFFFFFFFFFFFFFFFFFFFFFFFFFFFFFFFFFFFFFFFFFFFFFFFFFFFFFF  
FFFFFFFFFFFFFFFFFFFFFFFFFFFFFFFFFFFFFFFFFFFFFFFFFFFFFFFFFFFFFFFFFFFFFFFF  
@A00155:342:HHGFNDSXY:1:1124:2492:31172 2:N:0:GAACCTAG+TCCGCATA  
ACTACGACTTACACGGTAGGTCGTGAACAAGCCCGGAGTACATCTCCTTTGGAAGTACGAGACCCCTC  
CGGTCTTGTCCAACCTCTGTTTCGGCAGAGGATACCGTGCTCCACAGCTGTAAGGCTGTGGGCCCGAG  
+  
FFFFFFFFFFFFFFFFFFFFFFFFFFFFFFFFFFFFFFFFFFFFFFFFFFFFFFFFFFFFFFFFFFFFFFFF  
FFFFF:FFFFFFFFFFFFFFFFFFFFFFFFFFFFFFFFFFFFFFFFFFFFFFFFFFFFFFFFFFFFFFFF  
@A00155:342:HHGFNDSXY:1:1125:16179:2895 2:N:0:GAACCTAG+TCCGCATA  
GGTAGGTCGTGAACAAGCCCGGAGTACATCTCCTTTGGAAGTACGAGACCCCTCCGGTCTTGTCCAAC  
CTCTGTTTCGGCAGAGGATACCGTGCTCCACAGCTGTAAGGCTGTGGGCCCGAGAGAAGTCGCTCTCT  
+  
FFFFFFFFFFFFFFFFFFFFFFFFFFFFFFFFFFFFFFFFFFFFFFFFFFFFFFFFFFFFFFFFFFFFFFFF, FFFFFFFFF  
FFFFFFFFFFFFFFFFFFFFFFFFFFFFFFFFFFFFFFFFFFFFFFFFFFFFFFFFFFFFFFFFFFFFFFFF  
@A00155:342:HHGFNDSXY:1:1125:26648:4053 2:N:0:GAACCTAG+TCCGCATA  
AAGGACTCGTCAGGTAGCCTACTAGACTACGACTTACACGGTAGGTCGTGAACAAGCCCGGAGTACAT  
CTCCTTTGGAACCAGGAGACCCCTCCGGTCTTGTCCAACCTCTGTTTCGGCAGAGGATACCGTG  
+  
FFFFFFFFF:FFFFFFFFFFFFF:FFFFFFFFFFFFF:FFFFFFFFFFFFFFFFFFFFFFFFFFFFFFFFFFFFF  
FFFFFFFFFFFFFFFFFFFFFFFFFFFFFFFFFFFFFFFFFFFFFFFFFFFFFFFFFFFFFFFFFFFFFFFF  
@A00155:342:HHGFNDSXY:1:1125:8730:13886 2:N:0:GAACCTAG+TCCGCATA  
CCTACTAGACTACGACTTACACGGTAGGTCGTGAACAAGCCCGGAGTACATCTCCTTTGGAACCAGGA  
GACCCCTCCGGTCTTGTCCAACCTCTGTTTCGGCAGAGGATACCGTGCTCCACAGCTGTAAGGCTGTG  
+  
FFFFFFFFFFFFFFFFFFFFFFFFFFFFFFFFFFFFFFFFFFFFFFFFFFFFFFFFFFFFFFFFFFFFFFFF: FFFFFFFFF  
FFFFFFFFFFFFFFFFFFFFFFFFFFFFFFFFFFFFFFFFFFFFFFFFFFFFFFFFFFFFFFFFFFFFFFFF  
@A00155:342:HHGFNDSXY:1:1125:23818:15749 2:N:0:GAACCTAG+TCCGCATA  
CACACCGCCTTAGATCAGCTGTGTCCACTTAAGGACTCACCTCTGGCCTATGGTCATCTCAATGCCGA  
GAGGGATGTGGAGGGCGAGAGAGAGCGACTTCTCTCGGGCCCACAGCCTTACAGCTGTGGAGCACGGT  
+  
FFFFFFFFFFFFFFFFFFFFFFFFFFFFFFFFFFFFFFFFFFFFFFFFFFFFFFFFFFFFFFFFFFFFFFFF, FFFFFFFFF  
FFFFF, FFFFFFFFFFFFFFFFFFFFFFFFFFFFFFFFFFFFFFFFFFFFFFFFFFFFFFFFFFFFFFFFF  
@A00155:342:HHGFNDSXY:1:1125:17418:29246 2:N:0:GAACCTAG+TCCGCATA  
CTTGTCCAACCTCTGTTTCGGCAGAGGATACCGTGCTCCACAGCTGTAAGGCTGTGGGCCCGAGAGAA  
GTGCTCTCTCTCGCCCTCCACATCCCTCTCGGCATTGAGATGACCATAGGCCAGAGGTGAGTCCTTA  
+  
FFFFFFFFFFFFFFFFFFFFFFFFFFFFFFFFFFFFFFFFFFFFFFFFFFFFFFFFFFFFFFFFFFFFFFFF  
FFFFFFFFFFFFFFFFFFFFFFFFFFFFFFFFFFFFFFFFFFFFFFFFFFFFFFFFFFFFFFFFFFFFFFFF: F  
@A00155:342:HHGFNDSXY:1:1126:6596:30389 2:N:0:GAACCTAG+TCCGCATA  
AGGACGAAACCGTCGTAACCTCTTCGAGTTGTGTAAGTTTCGTCCTAAAAAGGACTCGTCAGGTAGCCT  
ACTAGACTACGACTTACACGGTAGGTCGTGAACAAGCCCGGAGTACATCTCCTTTGGAAGTACGAGAC  
+  
FFFFFFFFFFFFFFFFFFFFFFFFFFFFFFFFFFFFFFFFFFFFFFFFFFFFFFFFFFFFFFFFFFFFFFFF, : FFFFFFFFF  
FFFF: FFFFFFFFFFFFFF: FFFFFFFF: FFFFFFFF: FFFFFFFF: FFFFFFFF: FFFFFFFF  
@A00155:342:HHGFNDSXY:1:1126:13548:36417 2:N:0:GAACCTAG+TCCGCATA  
GGACTCGTCAGGTAGCCTACTAGACTACGACTTACACGGTAGGTCGTGAACAAGCCCGGAGTACATCT  
CCTTTGGAAGTACGAGACCCCTCCGGTCTTGTCCAACCTCTGTTTCGGCAGAGGATACCGTGCTCCAC  
+  
FFFFFFFFFFFFFFF: FFFFFFFFFFFFFFFFFFFFFFFFFFFFFFFFFFFFFFFFFFFFFFFFFFFFFFFFF  
FFFFFFFFFFFFFFFFFFFFFFFFFFFFFFFFFFFFFFFFFFFFFFFFFFFFFFFFFFFFFFFFFFFFFFFF  
@A00155:342:HHGFNDSXY:1:1126:7193:36558 2:N:0:GAACCTAG+TCCGCATA  
GTTTCGTCCTAAAAAGGACTCGTCAGGTAGCCTACTAGACTACGACTTACACGGTAGGTCGTGAACAA  
GCCCGGAGTACATCTCCTTTGGAAGTACGAGACCCCTCCGGTCTTGTCCAACCTCTGTTTCGGCAGAG  
+

```
F:F:FFFFFFFFFFFFFFFFFFFFFFFFFFFFFFFFFFFFFFFF:FFFFFFFFFFFFFFFFFFFFFFFF:FFFFFFFFFFFFF
FFF:FFFFFFFFFFFFFFFFFFFFFFFFFFFFFFFFFFFFFFFF:FFFFFFFFFFFFFFFFFFFFFFFF:FFFFFFF:F
@A00155:342:HHGFNDSXY:1:1127:2862:11490 2:N:0:GAACCTAG+TCCGCATA
TAGGAGACCCCTCCGGTCTTGTTCAACCTCTGTTTCGGCAGAGGATACCGTGCTCCACAGCTGTAAGG
CTGTGGGCCCGAGAGAAGTCGCTCTCTCTCGCCCTCCACATCCCTCTCGGCATTGAGATGACCATAGG
+
FFFFFFFFFFFFFFFFFFFFFFFFFFFFFFFFFFFFFFFFFFFFFFFFFFFFFFFFFFFFFFFFFFFFFFFFFFFF
FFFFFFFFFFFFFFFFFFFFFFFFFFFFFFFFFFFFFFFFFFFFFFFFFFFFFFFFFFFFFFFFFFFFFFFFFFFF:FFFFFFFFFFFFFFFFFFFFFFFFFFFFFFFFFFFF
@A00155:342:HHGFNDSXY:1:1127:18349:19993 2:N:0:GAACCTAG+TCCGCATA
CAAGGACGAAACCGTCGTTACTCTTTGAGTTGTGTAAGTTTCGTCCTAAAAAGGACTCGTCAGGTAGC
CTACTAGACTACGACTTACACGGTAGGTCGTGAACAAGCCCGGAGTACATCTCCTTTGGAAGTACGAG
+
FFFFFFFFFFFFFFFFFFFFFFFFFFFFFFFFFFFFFFFFFFFFFFFFFFFFFFFFFFFFFFFFFFFFFFFFFFFF
FFFFFFFFFFFFFFFFFFFFFFFFFFFFFFFFFFFFFFFFFFFFFFFFFFFFFFFFFFFFFFFFFFFFFFFFFFFF,FFFFFFFFFFFFFFFFFFFFFFFF,FFFFFFFFFFFFF
@A00155:342:HHGFNDSXY:1:1127:28185:28354 2:N:0:GAACCTAG+TCCGCATA
GAGACCCCTCCGGTCTTGTTCAACCTCTGTTTCGGCAGAGGATACCGTGCTCCACAGCTGTAAGGCTG
TGGGCCCGAGAGAAGTCGCTCTCTCTCGCCCTCCACATCCCTCTCGGCATTGAGATGACCATAGGCCA
+
FFFFFFFFFFFFFFFFFFFFFFFFFFFFFFFFFFFFFFFFFFFFFFFFFFFFFFFFFFFFFFFFFFFFFFFFFFFF
FFFFFFFFFFFFFFFFFFFFFFFFFFFFFFFFFFFFFFFFFFFFFFFFFFFFFFFFFFFFFFFFFFFFFFFFFFFF:FF:FFFFFFFFFFFFFFFFFFFFFFFFFFFFFFFFFFFF
@A00155:342:HHGFNDSXY:1:1127:27877:28510 2:N:0:GAACCTAG+TCCGCATA
GAGACCCCTCCGGTCTTGTTCAACCTCTGTTTCGGCAGAGGATACCGTGCTCCACAGCTGTAAGGCTG
TGGGCCCGAGAGAAGTCGCTCTCTCTCGCCCTCCACATCCCTCTCGGCATTGAGATGACCATAGGCCA
+
FFFF:FFFFFFFFFFFFFFFFFFFFFFFFFFFFFFFFFFFFFFFFFFFFFFFFFFFFFFFFFFFFFFFFFFFFF
FFFFFFFFFFFF,FFFFFFFFFFFFFFFFFFFFFFFFFFFFFFFFFFFFFFFFFFFFFFFFFFFFFFFFFFFFFFFF:FFFFFFFFFFFFFFFFFFFFFFFFFFFF
@A00155:342:HHGFNDSXY:1:1127:28718:28682 2:N:0:GAACCTAG+TCCGCATA
GAGACCCCTCCGGTCTTGTTCAACCTCTGTTTCGGCAGAGGATACCGTGCTCCACAGCTGTAAGGCTG
TGGGCCCGAGAGAAGTCGCTCTCTCTCGCCCTCCACATCCCTCTCGGCATTGAGATGACCATAGGCCA
+
FF,FF,:F,FFFF,,::FFFF:FFFF:FFFF:FFFF,FFFF,FFFFFFFFFFFFFFFFFFFFFFFF:FFF
FFFFFFFFFFFFF,F:FFFFFFFFFFFF:F,FF,FFFFF:F:FFFFFFFFF:,FFFFFFFFFFFF,FFFFF:
@A00155:342:HHGFNDSXY:1:1127:8856:31015 2:N:0:GAACCTAG+TCCGCATA
GTTGTGTAAGTTTCGTCCTAAAAGGACTCGTCAGGTAGCCTACTAGACTACGACTTACACGGTAGGT
CGTGAACAAGCCCGGAGTACATCTCCTTTGGAAGTACGAGACCCCTCCGGTCTTGTTCAACCTCTGTT
+
FFFFFFFFFFFFFFFFFFFFFFFFFFFFFFFFFFFFFFFFFFFFFFFFFFFFFFFFFFFFFFFFFFFFFFFFFFFF
FFF:FFFF:FFFFFFFF:FFFFFFFF:FFF:FFFFFFFFFFFFFFFFFFFFFFFFFFFFFFFFFFFFFFFFFFFF,F
@A00155:342:HHGFNDSXY:1:1127:16875:31250 2:N:0:GAACCTAG+TCCGCATA
GGCTGTGGGCCCGAGAGAAGTCGCTCTCTCTCGCCCTCCACATCCCTCTCGGCATTGAGATGACCATA
GGCCAGAGGTGAGTCCTTAAGTGGACACAGCTGATCTAAGGCGGTGTGGTGGGGCATGGGTTTGAACC
+
FFFFFFFFFFFFFFFFFFFFFFFFFFFFFFFFFFFFFFFFFFFFFFFFFFFFFFFFFFFFFFFFFFFFFFFFFFFF:FFFFFFFFFFFFFFFFFFFFFFFFFFFF
FFFFFFFFFFFFFFFFFFFFFFFFFFFFFFFFFFFFFFFFFFFFFFFFFFFFFFFFFFFFFFFFFFFFFFFFFFFF:FFFFFFFFFFFFFFFFFFFFFFFFFFFFFFFFFFFF
@A00155:342:HHGFNDSXY:1:1127:24885:33599 2:N:0:GAACCTAG+TCCGCATA
CTGGCCTATGGTCATCTCAATGCCGAGAGGGATGTGAAGGGCGAGAGAGAGCGACTTCTCTCGGGCCC
ACAGCCTTACAGCTGTGGAGCACGGTATCCTCTGCCGAAACAGAGGTTGGACAAGACCGGAG
+
FFFFFFFFFFFFFFFFFFFFFFFFFFFFFFFFFFFFFFFF:F:FFFFFFFFFFFFFFFFFFFFFFFFFFFFFFFFFFFFFFFFFFFF
FFFFFF,FFFFFFFFFFFFFFFFFFFFFFFFFFFFFFFFFFFFFFFFFFFFFFFFFFFFFFFFFFFFFFFFFFFF
@A00155:342:HHGFNDSXY:1:1128:21549:7091 2:N:0:GAACCTAG+TCCGCATA
ACTTACACGGTAGGTGCTGAACAAGCCCGGAGTACATCTCCTTTGGAAGTACGAGACCCCTCCGGTCT
TGTTCAACCTCTGTTTCGGCAGAGGATACCGTGCTCCACAGCTGTTAGGCTGTGGGCCCGAGAGAAGT
+
```

FFFFFFFFFFFFFFFFFFFFFFFFFFFFFFFFFFFFFFFFFFFFFFFFFFFFFFFFFFFFFFFFFFFFFFFFFFFFFFFF  
FFFFFFFFFFFFFFFFFFFFFFFFFFFFFFFFFFFFFFFFFFFFFFFFFFFFFFFFFFFFFFFFFFFFFFFFFFFFFFFF  
@A00155:342:HHGFNDSXY:1:1128:25753:15468 2:N:0:GAACCTAG+TCCGCATA  
CTCTACGAGTTGTGTAAGTTTCGTCCTAAAAAGGACTCGTCAGGTAGCCTACTAGACTACGACTTACA  
CGGTAGGTCGTGAACAAGCCCGGAGTACATCTCCTTTGGAAGTACGAGACCCCTCCGGTCTTGTCCAA  
+  
FFFFFFFFFFFFFFFFFFFFFFFFFFFFFFFFFFFFFFFFFFFFFFFFFFFFFFFFFFFFFFFFFFFFFFFFFFFFFFFF  
FFFFFFF:FFFFFFFFFFFFFFFFFFFFFFFFFFFFFFFFFFFFFFFFFFFFFFFFFFFFFFFFFFFFFFFFFFFFFFF  
@A00155:342:HHGFNDSXY:1:1129:17282:15765 2:N:0:GAACCTAG+TCCGCATA  
GGGCCCCGAGAGAAGTCGCTCTCTCGCCCTCCACATCCCTCTCGGCATTGAGATGACCATAGGCCAG  
AGGTGAGTCCTTAAGTGACACAGCTGATCTAAGGCGGTGTGGCGGGGCATGGGTTTGAACCCCCATG  
+  
FFFFFFFFFFFFFFFFFFFFFFFFFFFFFFFFFFFFFFFFFFFFFFFFFFFFFFFFFFFFFFFFFFFFFFFFFFFFFFFF  
FFFFFFFFF:FFFFFFFFFFFFFFFFFFFFFFFFFFFFFFFFFFFFFFFFFFFFFFFFFFFFFFFFFFFFFFFFFFFFFFF  
@A00155:342:HHGFNDSXY:1:1129:17264:24314 2:N:0:GAACCTAG+TCCGCATA  
ACTACGACTTACACGGTAGGTCGTGAACAAGCCCGGAGTACATCTCCTTTGGAAGTACGAGACCCCTC  
CGGTCTTGTCCAACCTCTGTTTCGGCAGAGGATACCGTGCTCCACAGCTGTAAGGCTGTGGGCCCGAG  
+  
FFFFFFFFFFFFFFFFFFFFFFFFFFFFFFFFFFFFFFFFFFFFFFFFFFFFFFFFFFFFFFFFFFFFFFFFFFFFFFFF  
FFFFFFFFF:FFFFFFFFFFFFFFFFFFFFFFFFFFFFFFFFFFFFFFFFFFFFFFFFFFFFFFFFFFFFFFFFFFFFFFF  
@A00155:342:HHGFNDSXY:1:1130:11379:8453 2:N:0:GAACCTAG+TCCGCATA  
CAGGTAGCCTACTAGACTACGACTTACACGGTAGGTCGTGAACAAGCCCGGAGTACATCTCCTTTGGA  
ACTAGGAGACCCCTCCGGTCTTGTCCAACCTCTGTTTCGGCAGAGGATACCGTGCTCCACAGCTGTAA  
+  
FFFFFFFFFFFFFFFFFFFFFFFFFFFFFFFFFFFFFFFFFFFFFFFFFFFFFFFFFFFFFFFFFFFFFFFFFFFFFFFF  
FFFFFFFFF:FFFFF:FFFFF  
@A00155:342:HHGFNDSXY:1:1130:29324:9408 2:N:0:GAACCTAG+TCCGCATA  
AAAAGGACTCGTCAGGTAGCCTACTAGACTACGACTTACACGGTAGGTCGTGAACAAGCCCGGAGTAC  
ATCTCCTTTGGAAGTACGAGACCCCTCCGGTCTTGTCCAACCTCTGTTTCGGCAGAGGATACCGTGCT  
+  
FFFFFFFFFFFFFFFFFFFFFFFFFFFFFFFFFFFFFFFFFFFFFFFFFFFFFFFFFFFFFFFFFFFFFFFFFFFFFFFF  
FFFFFFFFF:FFFFF:FFFFF  
@A00155:342:HHGFNDSXY:1:1131:23023:16689 2:N:0:GAACCTAG+TCCGCATA  
GTTGTGTAAGTTTCGTCCTAAAAAGGACTCGTCAGGTAGCCTACTAGACTACGACTTACACGGTAGGT  
CGTGAACAAGCCCGGAGTACATCTCCTTTGGAAGTACGAGACCCCTCCGGTCTTGTCCAACCTCTGTT  
+  
FFFFFFFFFFFFFFFFFFFFFFFFFFFFFFFFFFFFFFFFFFFFFFFFFFFFFFFFFFFFFFFFFFFFFFFFFFFFFFFF  
FFFFFFFFF:FFFFF:FFFFF  
@A00155:342:HHGFNDSXY:1:1132:11451:8171 2:N:0:GAACCTAG+TCCGCATA  
GGACTCGTCAGGTAGCCTACTAGACTACGACTTACACGGTAGGTCGTGAACAAGCCCGGAGTACATCT  
CCTTTGGAAGTACGAGACCCCTCCGGTCTTGTCCAACCTCTGTTTCGGCAGAGGATACCGTGCTCCAC  
+  
FFFFFFFFFFFFFFFFFFFFFFFFFFFFFFFFFFFFFFFFFFFFFFFFFFFFFFFFFFFFFFFFFFFFFFFFFFFFFFFF  
FFFFFFFFF:FFFFF:FFFFF  
@A00155:342:HHGFNDSXY:1:1132:17897:27070 2:N:0:GAACCTAG+TCCGCATA  
TTTCGTCCTAAAAAGGACTCGTCAGGTAGCCTACTAGACTACGACTTACACGGTAGGTCGTGAACAAG  
CCCGGAGTACATCTCCTTTGGAAGTACGAGACCCCTCCGGTCTTGTCCAACCTCTGTTTCGGCAGAGG  
+  
FFFFFFFFFFFFFFFFFFFFFFFFFFFFFFFFFFFFFFFFFFFFFFFFFFFFFFFFFFFFFFFFFFFFFFFFFFFFFFFF  
FFFFFFFFF:FFFFF:FFFFF  
@A00155:342:HHGFNDSXY:1:1132:4589:34366 2:N:0:GAACCTAG+TCCGCATA  
TCTCCTTTGGAAGTACGAGACCCCTCCGGTCTTGTCCAACCTCTGTTACGGCAGAGGATACCGTGCTC  
CACAGCTGTAAGGCTGTGGGCCCGAGAGAAGTCGCTCTCTCGCCCTCCACATCCCTCTCGGCATTG  
+

```

FFFFFFFFFFFFFFFFFFFFFFFFFFFFFFFFFFFFFFFFFFFFFFFFFFFFFFFFFFFFFFFFFFFFF
FFFFFFFFF:FFFFFF,FFFFFFFFFFFFFFFFFFFFFFFFFFFFFFFFFFFFFFFFFFFFFFFFFFFF
@A00155:342:HHGFNDSXY:1:1132:8440:36965 2:N:0:GAACCTAG+TCCGCATA
ATGCCCCACCACACCGCCTTAGATCAGCTGTGTCCACTTAAGGACTCACCTCTGGCCTATGGTCATCT
CAATGCCGAGAGGGATGTGGAGGGCGAGAGAGAGCGACTTCTCTCGGGCCCACAGCCTTACAGCTGTG
+
FFFFFFFFFFFFFFFFFFFFFFFFFFFFFFFFFFFFFFFFFFFFFFFFFFFFFFFFFFFFFFFFFFFFF
FFFFFFFFF:FFFFFFF:FFFFFFFFFFFFFFFFFFFFF:FFFFFFF:FFFFFFFFFFFFFFFFFFFFF::
@A00155:342:HHGFNDSXY:1:1132:15221:37027 2:N:0:GAACCTAG+TCCGCATA
AAAGGGACTCGTCAGGTAGCCTACTAGACTACGACTTACACGGTAGGTCGTGAACAAGCCCGGAGTAC
ATCTCCTTTGGAAGTACAGAGACCCCTCCGGTCTTGTCACACCTCTGTTTCGGCAGAGGATACCGTGCT
+
FF:FFFF:FFFFFFFFF:FFFFFFFFFFFFF:FFFF:FFFFFFFFF:FFFFF::FFFFFFFFF:FF:F,FFFFF
FFFFFFFFFFFFFFFFFFFFFFFFFFFFFFFFFFFFFFFFFFFFFFFFFFFFFFFFFFFFFFFFFFFFF:FFFFFFFFFFFFF:FFFFFFFFFFFFF,FFF
@A00155:342:HHGFNDSXY:1:1133:31620:10786 2:N:0:GAACCTAG+TCCGCATA
TGAACAAGCCCGGAGTACATCTCCTTTGGAAGTACAGAGACCCCTCCGGTCTTGTCACACCTCTGTTTC
GGCAGAGGATACCGTGCTCCACAGCTGTAAGGCTGTGGGCCCGAGAGAAGTCGCTCTCTCTCGCCCTC
+
FFFFFFFFFFFFFFFFFFFFFFFFFFFFFFFFFFFF,FFFF,FFFFFFFFFFFFFFFFFFFFFFFFFFFFFFFFFFFFF
FFFFFFFFFFFFFFFFFFFFFFFFFFFFFFFFFFFFF:FFFFFFFFFFFFFFFFFFFFFFFFFFFFFFFFFFFFF
@A00155:342:HHGFNDSXY:1:1133:28791:19163 2:N:0:GAACCTAG+TCCGCATA
CCTACTAGACTACGACTTACACGGTAGGTCGTGAACAAGCCCGGAGTACATCTCCTTTGGAAGTACGTA
GACCCCTCCGGTCTTGTCACACCTCTGTTTCGGCAGAGGATACCGTGCTCCACAGCTGTAAGGCTGTG
+
FFFFFFFFFFFFFFFFFFFFFFFFFFFF:FFF:F::FFF:FFFFFFFFFFFF,FFFFFFFFFFFFFFFFF:FFFFFFFFFFFF
FFF:FFFFFFFFFFFFFFFFF,FFFFFFFFFFFFFFFFFFFFFFFFFFFFF:FF:FFFFFFFFFFFFFFFFFFFFFFFFFFFFF
@A00155:342:HHGFNDSXY:1:1134:25834:26005 2:N:0:GAACCTAG+TCCGCATA
AACTAGGAGACCCCTCCGGTCTTGTCACACCTCTGTTTCGGCAGAGGATACCGTGCTCCACAGCTGTA
AGGCTGTGGGCCCGAGAGAAGTCGCTCTCTCTCGCCCTCCACATCCCTCTCGGCATTGAGATGACCAT
+
FFFFFFFFFFFFFFFFFFFFFFFFFFFF:FFFFFFFFFFFFFFFFFFFFF:FFFFFFFFFFFFFFFFFFFFFFFFFFFFF
FFFFFFFFFFFFFFFFFFFFFFFFFFFFFFFFFFFFFFFFFFFFFFFFFFFFFFFFFFFFFFFFFFFFF:FFFFFFFFFFFFFFFFFFFFFFFFFFFFF
@A00155:342:HHGFNDSXY:1:1135:13693:19351 2:N:0:GAACCTAG+TCCGCATA
GACCCCTCCGGTCTTGTCACACCTCTGTTTCGGCAGAGGATACCGTGCTCCACAGCTGTAAGGCTGTG
GGCCCGAGAGAAGTCGCTCTCTCTCGCCCTCCACATCCCTCTCGGCATTGAGATGACCATAGGC
+
FFFFFFFFFFFFFFFFFFFFFFFFFFFFFFFFFFFFFFFFFFFFFFFFFFFFFFFFFFFFFFFFFFFFF
FFFFFFFFFFFF:FFFFFFFFFFFFFFFFFFFFFFFFFFFFFFFFFFFFFFFFFFFFF,FFFFFFFFFFFFF,FFF
@A00155:342:HHGFNDSXY:1:1136:4128:35728 2:N:0:GAACCTAG+TCCGCATA
GGAGTACATCTCCTTTGGAAGTACAGAGACCCCTCCGGTCTTGTCACACCTCTGTTTCGGCAGAGGATA
CCGTGCTCCACAGCTGTAAGGCTGTGGGCCCGAGAGAAGTCGCTCTCTCTCGCCCTCCACATCCCTCT
+
FFFF:FFFFFFFFFFFFFFFFFFFFF:FFFFFFFFFFFFFFFFFFFFFFFFFFFFFFFFFFFFFFFFFFFFF:
FFFFFFFFFFFF:FFFFFFFFFFFFFFFFFFFFFFFFFFFFFFFFFFFFFFFFFFFFFFFFFFFFFFFFFFFFF
@A00155:342:HHGFNDSXY:1:1136:3803:35916 2:N:0:GAACCTAG+TCCGCATA
GGAGTACATCTCCTTTGGAAGTACAGAGACCCCTCCGGTCTTGTCACACCTCTGTTTCGGCAGAGGATA
CCGTGCTCCACAGCTGTAAGGCTGTGGGCCCGAGAGAAGTCGCTCTCTCTCGCCCTCCACATCCCTCT
+
FFFFFFFFFFFFFFFFFFFFFFFFFFFFFFFFFFFFFFFFFFFFFFFFFFFFFFFFFFFFFFFFFFFFF:FFFFFFFFFFFFFFFFFFFFF
FFFFFFFFFFFFFFFFFFFFFFFFFFFFFFFFFFFFFFFFFFFFFFFFFFFFFFFFFFFFFFFFFFFFF:FFFFFFFFFFFFFFFFFFFFFFFFFFFFF
@A00155:342:HHGFNDSXY:1:1137:4824:1485 2:N:0:GAACCTAG+TCCGCATA
GAGTACATCTCCTTTGGAAGTATGAGACCCCTCCGGTCTTGTCACACCTCTGTTTCGGCAGAGGATAC
CGTGCTCCACAGCTGTAAGGCTGTGGGCCCGAGAGAAGTCGCTCTCTCTCGCCCTCCACATCCCTCT
+

```

FFFFFFFFFFFFFF,FFFFFF,F,FFFFFFFFFFFFFF:FFFFFFFF,FFFFFFFFFFFFFFFFFFFFFF  
FFFFFFFFFFFFFFFFFFFFFFFFFFFFFFFF:FFFFFFFF:FFFFFFFFFFFFFFFFFFFFFF:FF  
@A00155:342:HHGFNDSXY:1:1137:21947:5181 2:N:0:GAACCTAG+TCCGCATA  
GTTACTCTTCGAGTTGTGTAAGTTTCGTCCTAAAAAGGACTCGTCAGGTAGCCTACTAGACTACGACT  
TACACGGTAGGTCGTGAACAAGCCCGGAGTACATCTCCTTTGGAAGTGGAGACCCCTCCGGTCTTGT  
+  
FFFFFFFFFFFFFFFFFFFFFFFFFFFFFFFFFFFFFFFFFFFFFFFFFFFFFFFFFFFFFFFF:FFFFFFFF  
FFFFFFFF:FFFFFFFFFFFFFFFFFFFFFFFFFFFFFFFF:FFFFF,FFFFFFFFFFFFFFFF:FFFFFFFFFFFF  
@A00155:342:HHGFNDSXY:1:1137:4788:28541 2:N:0:GAACCTAG+TCCGCATA  
GAGACCCCTCCGGTCTTGTCCAACCTCTGTTTCGGCAGAGGATACCGTGCTCCACAGCTGTAAGGCTG  
TGGGCCCCGAGAGAAGTCGCTCTCTCTCGCCCTCTACATCCCTCTCGGCATTGAGATGACCATAGGCCA  
+  
FFFFFFFFFFFFFFFFFFFFFFFFFFFFFFFFFFFFFFFFFFFFFFFFFFFFFFFFFFFFFFFFFFFF  
FFF:FFFFFFFF:FFFFFFFFFFFFFFFFFFFFFFFFFFFFFFFFFFFFFFFFFFFFFFFFFFFF:FFFFFF  
@A00155:342:HHGFNDSXY:1:1137:31882:35070 2:N:0:GAACCTAG+TCCGCATA  
TAGGACGAACTTACACAACCTCAAAGAGTAACGACGGTTTCGTCCTTGGAACGGACTCATCAGGGAGC  
CTACTAGACTCCGACCGTCATGGGGGTTCAAACCCATGCCCGCCACACCGCCTTAGATCAGCTGTGT  
+  
FFFFFFFFFFFFFFFFFFFFFFFFFFFFFFFFFFFFFFFFFFFFFFFFFFFFFFFFFFFFFFFFFFFF  
FFFFFFFF:FFFFFFFFFFFFFFFFFFFFFFFFFFFFFFFFFFFFFFFFFFFFFFFFFFFFFFFFFFFF  
@A00155:342:HHGFNDSXY:1:1138:2094:6872 2:N:0:GAACCTAG+TCCGCATA  
CACGGTAGGTCGTGAACAAGCCCGGAGTACATCTCCTTTGGAAGTGGAGACCCCTCCGGTCTTGTCC  
AACCTCTGTTTCGGCAGAGGATACCGTGCTCCACAGCTGTAAGGCTGTGGGCCCCGAGAGAAGTCGCTC  
+  
F:F:FFFFFFFFFFFFFFFFFFFFFFFFFFFFFFFFFFFFFFFFFFFFFFFFFFFFFFFFFFFF  
F,FFF:FFFFFFFFFFFFFFFFFFFFFFFFFFFFFFFFFFFFFFFFFFFFFFFFFFFFFFFFFFFF:FFF:FFFFFFFFFFFFFFFFFFFFFFFFFFFFFFFF:FF:FFF  
@A00155:342:HHGFNDSXY:1:1138:2383:13103 2:N:0:GAACCTAG+TCCGCATA  
CCACACCGCCTTAGATCAGCTGTGTCCACTTAAGGACTCACCTCTGGCCTATGGTCATCTCAATGCCG  
AGAGGGATGTGGAGGGCGAGAGAGAGCGACTTCTCTCGGGCCACAGCCTTACAGCTGTGGAGCACGG  
+  
FFFFFFFFFFFFFFFFFFFFFFFFFFFFFFFFFFFFFFFFFFFFFFFFFFFFFFFFFFFFFFFFFFFF  
FFFFFFFFFFFFFFFFFFFFFFFFFFFFFFFFFFFFFFFFFFFFFFFFFFFFFFFFFFFFFFFFFFFF  
@A00155:342:HHGFNDSXY:1:1139:19081:9424 2:N:0:GAACCTAG+TCCGCATA  
AAGACCGGAGTACATCTCCTTTGGAAGTGGAGACCCCTCCGGTCTTGTCCAACCTCTGTTTCGGCAG  
AGGATACCGTGCTCCACAGCTGTAAGGCTGTGGGCCCCGAGAGAAGTCGCTCTCTCTCGCCCTCCACAT  
+  
FF:,FF:FFFFFF,FFFFFF:FFFFFFFFFFFFFFFF:FFFFF,,:FFFFFFFFFFFFFFFFFFFF::FFFF  
,FFFFFF:FFFFFFFFFFFFFFFFFFFFFFFFFFFFFFFF:F,FFFFFFFF,FFFFFFFFFFFF,FFFF:FFF  
@A00155:342:HHGFNDSXY:1:1139:21766:12446 2:N:0:GAACCTAG+TCCGCATA  
TCCTAAAAAGGACTCGTCAGGTAGCCTTCTAGACTACGACTTACACGGTAGGTCGTGAACAAGCCCGG  
AGTACATCTCCTTTGGAAGTGGAGACCCCTCCGGTCTTGTCCAACCTCTGTTTCGGCAGAGGATACC  
+  
FFFFFFFFFFFFFFFFFFFFFFFFFFFFFFFFFFFFFFFFFFFFFFFFFFFFFFFFFFFFFFFFFFFF  
FFFFFFFFFFFFFFFFFFFFFFFFFFFFFFFFFFFFFFFFFFFFFFFFFFFFFFFFFFFFFFFFFFFF  
@A00155:342:HHGFNDSXY:1:1140:4300:2738 2:N:0:GAACCTAG+TCCGCATA  
GGACTCGTCAGGTAGCCTACTAGACTACGACTTACACGGTAGGTCGTGAACAAGCCCGGAGTACATCT  
CCTTTGGAAGTGGAGACCCCTCCGGTCTTGTCCAACCTCTGTTTCGGCAGAGGATACCGTGCTCCAC  
+  
FFFFFFFFFFFFFFFF:FFFFFFFFFFFFFFFFFFFFFFFFFFFFFFFFFFFFFFFFFFFFFFFFFFFF  
FFFFFFFFFFFFFFFFFFFFFFFFFFFFFFFFFFFFFFFFFFFFFFFFFFFFFFFFFFFFFFFFFFFF:FFFFFFFF  
@A00155:342:HHGFNDSXY:1:1140:30834:5729 2:N:0:GAACCTAG+TCCGCATA  
TACGACTTACACGGTAGGTCGTGAACAAGCCCGGAGTACATCTCCTTTGGAAGTGGAGACCCCTCCG  
GTCTTGTCCAACCTCTGTTTCGGCAGAGGATACCGTGCTCCACAGCTGTAAGGCTGTGGGCCCCG  
+



FFFFFFFFFFFFFFFFFFFFFFFFFFFFFFFFFFFFFFFFFFFFFFFFFFF:  
FFFF:FFFFFFFFFFFFFFFFFFFFFFFFFFFFFFFFFFFFFFFFFFFF  
@A00155:342:HHGFNDSXY:1:1140:31693:12759 2:N:0:GAACCTAG+TCCGCATA  
CGTTACTCTTCGAGTTGTGTAAGTTTTCGTCTAAAAAGGACTCGTCAGGTAGCCTACTAGACTACGAC  
TTACACGGTAGGTCTGTAACAAGCCCCGAGTACATCTCCTTTGAACTAGGAGACCCTCCGGTCTTG  
+  
FFFFFFFFFFFFFFFF:F:FFFF:FFFFFFFFFFFFFFFFFFFFFFFFFFFFFFFFFFFFFFFFFFFFFFFFFFFF  
FFFFFFFFFFFFFFFFFFFFFFFFFFFFFFFFFFFFFFFFFFFFFFFFFFFF:FFFF:FFFFFFFFFFFFFFFFFFFF  
@A00155:342:HHGFNDSXY:1:1140:24189:16203 2:N:0:GAACCTAG+TCCGCATA  
CATCTCCTTTGAACTAGGAGACCCTCCGGTCTTGTCCAACCTCTGTTTCGGCAGAGGATACCGTGC  
TCCACAGCTGTAAGGCTGTGGGCCCGAGAGAAGTCGCTCTCTCTCGCCCTCTACATCCCTCTCGGCAT  
+  
FFFFFFFFFFFFFFFFFFFFFFFFFFFFFFFFFFFFFFFFFFFFFFFFFFFF:FFFFFFFFFFFFFFFFFFFF  
FFFFFFFFFFFFFFFFFFFFFFFFFFFFFFFFFFFFFFFFFFFFFFFFFFFF:FFF:  
@A00155:342:HHGFNDSXY:1:1140:30129:16971 2:N:0:GAACCTAG+TCCGCATA  
AACCAAGAGACCCTCCGGTCTTGTCCAACCTCTGTTTCGGCAGAGGATACCGTGCTCCACAGCTGTA  
AGGCTGTGGGCCCGAGAGAAGTCGCTCTCTCTCGCCCTCCACATCCCTCTCGGCATTGAGATGACCAT  
+  
FFFFFFFFFFFFFFFFFFFFFFFF,FFFFFFFFFFFFFFFFFFFFFFFFFFFFFFFFFFFFFFFFFFFFFFFFFFFFF  
FFFFFFFFFFFFFFFFFFFFFFFFFFFFFFFFFFFFFFFFFFFFFFFFFFFF,FFFFFFFFFFFFF  
@A00155:342:HHGFNDSXY:1:1140:28510:20713 2:N:0:GAACCTAG+TCCGCATA  
AAGGACGAAACCGTCGTTACTCTTGGAGTTGTGTAAGTTTCGTCTAAAAAGGACTCGTCAGGTAGCC  
TACTAGACTACGACTTACACGGTAGGTCTGTAACAAGCCCAGTACATCTCCTTTGAACTAGGAGA  
+  
FFFFFFFFFFFFFFFFFFFFFFFF:,FFFFFFFFFFFFFFFFFFFFFFFFFFFFFFFFFFFFFFFFFFFFFFFFFFFF  
FFFFFFFFFFFFFFFFFFFFFFFFFFFFFFFFFFFFFFFFFFFFFFFFFFFF,FFFFFFFFFFFFF  
@A00155:342:HHGFNDSXY:1:1140:4508:23015 2:N:0:GAACCTAG+TCCGCATA  
CTGGCCTATGGTCATCTCAATGCCGAGAGGGATGTGAAGGGCGAGAGAGAGCGACTTCTCTCGGGCC  
ACAGCCTTACAGCTGTGGAGCACGGTATCCTCTGCCGAAACAGAGGTTGGACAAGACCGG  
+  
FFFFFFFFFFFFFFFFFFFFFFFFFFFFFFFFFFFFFFFFFFFFFFFFFFFF:FFFFFFFFFFFFFFFFFFFF  
FFFFFFFFFFFFFFFFFFFFFFFFFFFFFFFFFFFFFFFFFFFFFFFFFFFF:FFFF  
@A00155:342:HHGFNDSXY:1:1141:4797:7106 2:N:0:GAACCTAG+TCCGCATA  
AAAAGGACTCGTCAGGTAGCCTACTAGACTACGACTTACACGGTAGGTCTGTAACAAGCCCCGAGTAC  
ATCTCCTTTGGAACCAGGAGACCCTCCGGTCTTGTCCAACCTCTGTTTCGGCAGAGGATACCGTGCT  
+  
FFFFFFFFFFFFFFFFFFFFFFFFFFFFFFFFFFFFFFFFFFFFFFFFFFFF:FFFFFFFFFFFFFFFFFFFF  
FFFFFFFFFFFFFFFFFFFFFFFFFFFFFFFFFFFFFFFFFFFFFFFFFFFF:FF,FFFFFFFFFFFFFFFFFFFFF  
@A00155:342:HHGFNDSXY:1:1141:32624:10113 2:N:0:GAACCTAG+TCCGCATA  
ACATCTCCTTTGGAACCAGGAGACCCTCCGGTCTTGTCCAACCTCTGTTTCGGCAGAGGATACCGTG  
CTCCACAGCTGTAAGGCTGTGGGCCCGAGAGAAGTCGCTCTCTCTCGCCCTCCACATCCCTCTCGGC  
+  
FFFFFFFFFFFFFFFFFFFFFFFFFFFFFFFFFFFFFFFFFFFFFFFFFFFF:FFFF:FFFFFFFF  
FFFFFFFFFFFFFFFFFFFFFFFFFFFFFFFFFFFFFFFFFFFFFFFFFFFF,FFFFFFFFFFFFFFFFFFFF  
@A00155:342:HHGFNDSXY:1:1141:11288:10332 2:N:0:GAACCTAG+TCCGCATA  
TAGACTACGACTTACACGGTAGGTCTGTAACAAGCCCCGAGTACATCTCCTTTGAACTAGGAGACC  
CTCCGGTCTTGTCCAACCTCTGTTTCGGCAGAGGATACCGTGCTCCACAGCTGTAAGGCTGTGGGCC  
+  
FFFFFFFFFFFFFFFFFFFFFFFFFFFFFFFFFFFFFFFFFFFFFFFFFFFF,FFFFFFFFFFFF  
FFFFFFFFFFFFFFFFFFFFFFFFFFFFFFFFFFFFFFFFFFFFFFFFFFFF,FFFFFFFFFFFFFFFFFFFF  
@A00155:342:HHGFNDSXY:1:1141:23692:26897 2:N:0:GAACCTAG+TCCGCATA  
GAACCAGGAGACCCTCCGGTCTTGTCCAACCTCTGTTTCGGCAGAGGATACCGTGCTCCACAGCTGT  
AAGGCTGTGGGCCCGAGAGAAGTCGCTCTCTCTCGCCCTCCACATCCCTCTCGGCATTGAGATGACC

+

FFFFFFFFFFFFFFFFFFFFFFFFFFFFFFFFFFFFFFFFFFFFFFFFFFFFF:F:FFFFFFFFFFFFFFFFFFFFFFFF  
FFFFFFFFFFFFFFFFFFFFFFFFFFFFFFFFFFFFFFFFFFFFFFFFFFFFFFFFFFFFFFFFFFFFFFFFFFFFFFFF  
@A00155:342:HHGFNDSXY:1:1141:12147:29669 2:N:0:GAACCTAG+TCCGCATA  
AAAGGACTCGTCAGGTAGCCTACTAGACTACGACTTACACGGTAGGTCGTGAACAAGCCCCGGAGTACA  
TCTCCTTTGGA ACTAGGAGACCCCTCCGGTCTTG TCCAACCTCTGTTTCGGCAGAGGATACCGTGCTC  
+  
FFFFFFFFFFFFFFFFFFFFFFFFFFFFFFFFFFFFFFFFFFFFFFFFFFFFFFFFFFFFFFFFFFFFFFFFFFFFFFF  
FFFFFFFFFFFFFFFFFFFFFFFFFFFFFFFFFFFFFFFFFFFFFFFFFFFFFFFFFFFFFFFFFFFFFFFFFFFFFFF  
@A00155:342:HHGFNDSXY:1:1141:25174:33160 2:N:0:GAACCTAG+TCCGCATA  
AAAAGGACTCGTCAGGTAGCCTACTAGACTACGACTTACACGGTAGGTCGTGAACAAGCCCCGGAGTA  
ATCTCCTTTGGA ACTAGGAGACCCCTCCGGTCTTG TCCAACCTCTGTTTCGGCAGAGGATACCGTGCT  
+  
FFFFFFFFFFFFFFFFFFFFFFFFFFFFFFFFFFFFFFFFFFFFFFFFFFFFFFFFFFFFFFFFFFFFFFFFFFFFFFF  
FFFFFFFFFFFFFFFFFFFFFFFFFFFFFFFFFFFFFFFFFFFFFFFFFFFFFFFFFFFFFFFFFFFFFFFFFFFFFF:  
@A00155:342:HHGFNDSXY:1:1142:30391:29168 2:N:0:GAACCTAG+TCCGCATA  
TAGACTACGACTTACACGGTAGGTCGTGAACAAGCCCCGGAGTACATCTCCTTTGGA ACTAGGAGACC  
CTCCGGTCTTG TCCAACCTCTGTTTCGGCAGAGGATACCGTGCTCCACAGCTGTAAGGCTGTGGGCC  
+  
FFFFF, FFFFFFFFFFFFFFFFFFFFFFFFFFFFFFFFFFFFFFFFFFFF: FFFFFF, FFFFFF  
FFFFFFFFFFFFFFFFFF: FFFFFFFFFFFFFFFFFFFFFFFFFFFFFF: FFFFFFFFFF: FFFFFF  
@A00155:342:HHGFNDSXY:1:1143:2311:4398 2:N:0:GAACCTAG+TCCGCATA  
TACTCTTCGAGTTGTGTAAGTTTCGT CCTAAAAAGGACTCGTCAGGTAGCCTACTAGACTACGACTTA  
CACGGTAGGTCGTGAACAAGCCCCGGAGTACATCTCCTTTGGA ACTAGGAGACCCCTCCGGTCTTG TCC  
+  
FFFFFFFF, FF::F, FFFFFFFFF: FFFF: FFFFFFFFF: FFFF: : FFFFFFFFF: FFFFFFFFF  
FFFFFFFFFFFFFFFFFF: F, FF, FFFFFFFFFF: : FFFF:, FFFF: FF, FFFFFFFF: : FFFF  
@A00155:342:HHGFNDSXY:1:1144:17734:4398 2:N:0:GAACCTAG+TCCGCATA  
TACTCTTCGAGTTGTGTAAGTTTCGT CCTAAAAAGGACTCGTCAGGTAGCCTACTAGACTACGACTTA  
CACGGTAGGTCGTGAACAAGCCCCGGAGTACATCTCCTTTGGA ACTAGGAGACCCCTCCGGTCTTG TCC  
+  
FFFFF: FFFFFFFFFFFFFFFFFFFFFFFFFFFFFF, FFFFFFF: FFFFFFFFFFFFFFFFFFFFFFFFFF  
FFFFFFFFFFFFFFFFFFFFFFFFFFFFFFFFF: : FFFFFFFFFFFFFFFFFFFFFFFFFFFFFF: FFFF  
@A00155:342:HHGFNDSXY:1:1144:15185:9095 2:N:0:GAACCTAG+TCCGCATA  
TACGACTTACACGGTAGGTCGTGAACAAGCCCCGGAGTACATCTCCTTTGGA ACCAGGAGACCCCTCCG  
GTCTTG TCCAACCTCTGTTTCGGCAGAGGATACCGTGCTCCACAGCTGTAAGGCTGTGGGCCG  
+  
FFFFFFFFFFFFFFFFFFFFFFFFFFFFFFFFF: FFFFFFFFF, FFFFFFFFFF: FFFFFFFFFFFFFFFFF  
FFF: FFFFFFFFFFFFFFFFFFFFFFFFFF: FFFF: FFFFFFFFFFFFFFFFFFFFFFFFFFFFFF  
@A00155:342:HHGFNDSXY:1:1144:27543:27023 2:N:0:GAACCTAG+TCCGCATA  
AGTACATCTCCTTTGGA ACTAGGAGACCCCTCCGGTCTTG TCCAACCTCTGTTTCGGCAGAGGATACC  
GTGCTCCACAGCTGTAAGGCTGTGGGCCGAGAGAAGTCGCTCTCTCTCGCCCTCCACATCCCTCTCG  
+  
FFFFFFFFFFFFFFFFFFFFFFFFFFFFFFFFF: FFFFFFFFFFFFFFFFFFFFFFFFFFFFFFFFFF  
FFFFFFFFFFFFFFFFFFFFFFFFFFFFFFFFF: FFFFFFFFFFFFFFFFFFFFFFFFFFFFFFFFFF  
@A00155:342:HHGFNDSXY:1:1144:27661:27070 2:N:0:GAACCTAG+TCCGCATA  
AGTACATCTCCTTTGGA ACTAGGAGACCCCTCCGGTCTTG TCCAACCTCTGTTTCGGCAGAGGATACC  
GTGCTCCACAGCTGTAAGGCTGTGGGCCGAGAGAAGTCGCTCTCTCTCGCCCTCCACATCCCTCTCG  
+  
FFFFFFFFFFFFFFFFFFFFFFFFFFFFFFFFF: FFFFFFFFFFFFFFFFFFFFFFFFF: FFFFFFFFF  
FFFFFFFFFFFFFFFFFFFFFFFFFFFFFFFFF: FFFFFFFFFFFFFFFFFFFFFFFFFFFFFFFFFF  
@A00155:342:HHGFNDSXY:1:1144:28727:31767 2:N:0:GAACCTAG+TCCGCATA  
CCGTCGTTACTCTTTGAGTTGTGTAAGTTTCGT CCTAAAAAGGACTCGTCAGGTAGCCTACTAGACTA  
CGACTTACACGGTAGGTCGTGAACAAGCCCCGGAGTACATCTCCTTTGGA ACTAGGAGACCCCTCCGGT

FFFFFFFFFFFFF,:FFFFFFFFFFFFFFFFFFFFFFFFFFFFFFFFFFFFFFFFFFFFFFFFFFFFFFFFFFFFFFFFFFFFFFFFFFFFFFFF  
FFFFFFFFFFFFFFFFFFFFFFFFFFFFFFFFFFFFFFFFFFFFFFFFFFFFFFFFFFFFFFFFFFFFFFFFFFFFFFFFFFFFFFFFFFFFFFF,  
@A00155:342:HHGFNDSXY:1:1144:8187:33739 2:N:0:GAACCTAG+TCCGCATA  
AAGGACGAAACCGTCGTACTCTTCGAGTTGTGTAAGTTTCGTCCTAAAAAGGACTCGTCAGGTAGCA  
TACTAGACTACGACTTACACGGTAGGTCGTGAACAAGCCCCGAGTACATCTCCTTTGGAAGTAGGA  
+  
FFFFFFFF,FFFF,F:FFFFFFFF:F:F:F,:FFF:FFFFFFFFFFFFFFFFFFFFFFFFFFFFFFFFFFFFFFFFFFFFFFFFFFFFF,  
FFFFFFFF:FFFFFFFFFFFFFFFFFFFFFFFFFFFFFFFFFFFFFFFFFFFFFFFFFFFFFFFFFFFFFFFFFFFFFFFFFFFFFFFF  
@A00155:342:HHGFNDSXY:1:1144:25979:35430 2:N:0:GAACCTAG+TCCGCATA  
GCCTATGGTCATCTCAATGCCGAGAGGGATGTGGAGGGCGAGAGAGAGCGACTTCTCTCGGGCCCACA  
GCCTTACAGCTGTGGAGCACGGTATCCTCTGCCGAAACAGAGGTTGGACAAGACCGGAG  
+  
FFFFFFFFFFFFFFFFFFFFFFFFFFFFFFFFFFFFFFFFFFFFFFFFFFFFFFFFFFFFFFFFFFFFFFFFFFFFFFFFFFFFFFFFFFFF  
FFFFFFFFFFFFFFFFFFFFFFFFFFFFFFFFFFFFFFFFFFFFFFFFFFFFFFFFFFFFFFFFFFFFFFFFFFFFFFFFFFFFFFFFFFFF  
@A00155:342:HHGFNDSXY:1:1145:11939:1564 2:N:0:GAACCTAG+TCCGCATA  
AGAGGATACCGTGCTCCACAGCTGTAAGGCTGTGGGCCCGAGAGAAGTCGCTCTCTCTCGCCCTTCAC  
ATCCCTCTCGGCATTGAGATGACCATAGGCCAGAGGTGAGTCCTTAAGTGGACACAGCTG  
+  
FFFFFFFFFFFFFFFFFFFFFFFFFFFFFFFFFFFFFFFFFFFFFFFFFFFFFFFFFFFFFFFFFFFFFFFFFFFFFFFFFFFFFFFFFFFF  
FFFFFFFFFFFFFFFFFFFFFFFFFFFFFFFFFFFFFFFFFFFFFFFFFFFFFFFFFFFFFFFFFFFFFFFFFFFFFFFFFFFFFFFFFFFF  
@A00155:342:HHGFNDSXY:1:1145:3197:4742 2:N:0:GAACCTAG+TCCGCATA  
CGAGTTGTGTAAGTTTCGTCCTAAAAAGGACTCGTCAGGTAGCCTACTAGACTACGACTTACACGGTA  
GGTCGTGAACAAGCCCCGAGTACATCTCCTTTGGAAGTAGGAGACCCCTCCGGTCTTGTCCAACCTCT  
+  
FFFFFFFFFFFFFFFFFFFFFFFFFFFFFFFFFFFFFFFFFFFFFFFFFFFFFFFFFFFFFFFFFFFFFFFFFFFFFFFFFFFFFFFFFFFF  
FFFFFFFFFFFFFFFFFFFFFFFFFFFFFFFFFFFFFFFFFFFFFFFFFFFFFFFFFFFFFFFFFFFFFFFFFFFFFFFFFFFFFFFFFFFF  
@A00155:342:HHGFNDSXY:1:1145:3106:4773 2:N:0:GAACCTAG+TCCGCATA  
CGAGTTGTGTAAGTTTCGTCCTAAAAAGGACTCGTCAGGTAGCCTACTAGACTACGACTTACACGGTA  
GGTCGTGAACAAGCCCCGAGTACATCTCCTTTGGAAGTAGGAGACCCCTCCGGTCTTGTCCAACCTCT  
+  
FF:FFFFFFFFFFFFFFFFFFFFFFFFFFFFFFFFFFFFFFFFFFFFFFFFFFFFFFFFFFFFFFFFFFFFFFFFFFFFFFFFFFFFFFFF  
FFFFFFFFFFFFFFFFFFFFFFFFFFFFFFFFFFFFFFFFFFFFFFFFFFFFFFFFFFFFFFFFFFFFFFFFFFFFFFFFFFFFFFFFFFFF  
@A00155:342:HHGFNDSXY:1:1145:14154:8813 2:N:0:GAACCTAG+TCCGCATA  
AAAAGGACTCGTCAGGTAGCCTACTAGACTACGACTTACACGGTAGGTCGTGAACAAGCCCCGAGTAC  
ATCTCCTTTGGAAGTAGGAGACCCCTCCGGTCTTGTCCAACCTCTGTTTCGGCAGAGGATACCGTGCT  
+  
FFFFFFFFFFFFFFFFFFFFFFFFFFFFFFFFFFFFFFFFFFFFFFFFFFFFFFFFFFFFFFFFFFFFFFFFFFFFFFFFFFFFFFFFFFFF  
FFFFFFFFFFFFFFFFFFFFFFFFFFFFFFFFFFFFFFFFFFFFFFFFFFFFFFFFFFFFFFFFFFFFFFFFFFFFFFFFFFFFFFFFFFFF  
@A00155:342:HHGFNDSXY:1:1145:21775:19225 2:N:0:GAACCTAG+TCCGCATA  
CCTTTGGAAGTAGGAGACCCCTCCGGTCTTGTCCAACCTCTGTTTCGGCAGAGGATACCGTGCTCCAC  
AGCTGTAAGGCTGTGGGCCCGAGAGAAGTCGCTCTCTCTCGCCCTCCACATCCCTCTCAGC  
+  
FFFFFFFF,F,FFFFFFFFFFFFFFFFFFFFFFFFFFFFFFFFFFFFFFFFFFFFFFFFFFFFFFFFFFFFFFFFFFFFFFFFFFFFFFFF  
FFFFFFFFFFFFFFFFFFFFFFFFFFFFFFFFFFFFFFFFFFFFFFFFFFFFFFFFFFFFFFFFFFFFFFFFFFFFFFFFFFFFFFFFFFFF  
@A00155:342:HHGFNDSXY:1:1146:16721:4022 2:N:0:GAACCTAG+TCCGCATA  
GGTAGCCTACTAGACTACGACTTACACGGTAGGTCGTGAACAAGCCCCGAGTACATCTCCTTTGGAAC  
TAGGAGACCCCTCCGGTCTTGTCCAACCTCTGTTTCGGCAGAGGATACCGTGCTCCACAGCTGTAAGG  
+  
FFFFFFFFFFFFFFFFFFFFFFFFFFFFFFFFFFFFFFFFFFFFFFFFFFFFFFFFFFFFFFFFFFFFFFFFFFFFFFFFFFFFFFFFFFFF  
FFFFFFFFFFFFFFFFFFFFFFFFFFFFFFFFFFFFFFFFFFFFFFFFFFFFFFFFFFFFFFFFFFFFFFFFFFFFFFFFFFFFFFFFFFFF  
@A00155:342:HHGFNDSXY:1:1146:25229:20478 2:N:0:GAACCTAG+TCCGCATA  
CCTACTAGACTACGACTTACACGGTAGGTCGTGAACAAGCCCCGAGTACATCTCCTTTGGAACCAGGA  
GACCCCTCCGGTCTTGTCCAACCTCTGTTTCGGCAGAGGATACCGTGCTCCACAGCTGTAAGGCTGTG  
+

FFFFFFFFFFFFFFFFFFFFFFFFFFFFFFFFFFFFFFFFFFFFFFFFFFFFFFFFFFFFFFFFFFFFF  
FFFFFFFFFFFFFFFFFFFFFFFFFFFFFFFFFFFFFFFFFFFFFFFFFFFFFFFFFFFFFFFFFFFFF  
@A00155:342:HHGFNDSXY:1:1146:29740:31078 2:N:0:GAACCTAG+TCCGCATA  
CAAGGACGAAACCGTCGTACTCTTCGAGTTGTGTAAGTTTCGTCCTAAAAAGGACTCGTCAGGTAGC  
CTACTAGACTACGACTTACACGGTAGGTCGTGAACAAGCCCCGGAGTACATCTCCTTTGGA ACTAGGAG  
+  
FFFFFFFFFFFFFFFFFFFFFFFF:F, FFFFFFFFFFFFFFFF: FFFFFFFFFF: FF: F: FF, : FFFFFFFF: FFFF: F  
FFFFFFFFFFFFFFFFFFFFFFFFFFFFFFFFFFFFFFFFFFFFFFFFFFFFFFFFFFFFFFFFFFFF, FFFFFFFFFFFFFFFFFFF, F: FF: FFFFFFFF  
@A00155:342:HHGFNDSXY:1:1146:30508:33974 2:N:0:GAACCTAG+TCCGCATA  
GGAGTACATCTCCTTTGGA ACTAGGAGACCCCTCCGGTCTTG TCCAACCTCTGTTTT CGGCAGAGGATA  
CCGTGCTCCACAGCTGTAAGGCTGTGGGCCCGAGAGAAGTCGCTCTCTCTCGCCCTCCACATCCCTCT  
+  
FFFFFFFFFFFFFFFFFFFFFFFF: FFFFFFFFFFFFFFFFFFFFFFFF, FFFFFFFFFFFFFFFF, FFFFFFFFFFFFFFFFFF  
FFFFFFFFFFFFFFFFFFFFFFFFFFFFFFFFFFFFFFFFFFFFFFFFFFFFFFFFFFFFFFFFFFFF: , FFFFFFFFFFFFFFF: FFFFFFFFFFFFFFFFFFFFFF  
@A00155:342:HHGFNDSXY:1:1147:30391:27007 2:N:0:GAACCTAG+TCCGCATA  
CTGGCCTATGGTCATCTCAATGCCGAGAGGGATGTGGAGGGCGAGAGAGAGCGACTTCTCTCGGGCCC  
ACAGCCTTACAGCTGTGGAGCACGGTATCCTCTGCCGAAACAGAGGTTGGACAAGACCGGAG  
+  
FFFFFFFFFFFFFFFFFFFFFFFFFFFFFFFFFFFFFFFFFFFFFFFFFFFFFFFFFFFFFFFFFFFFF  
FFFFFFF: FFFFFFFFFFFFFFFFFFFFFFFFFFFFFFFFFFFFFFFFFFFFFFFFFFFFFFFFFFFFFF: FFFFFFFFFF: FFFF  
@A00155:342:HHGFNDSXY:1:1147:31232:32221 2:N:0:GAACCTAG+TCCGCATA  
ACTAGGAGACCCCTCCGGTCTTG TCCAACCTCTGTTTC GGCAGAGGATACC GTGCTCCACAGCTGTAA  
GGCTGTGGGCCCGAGAGAAGTCGCTCTCTCTCGTCCTCCACATCCCTCTCGGCATTGAGATGAC  
+  
FFFFFFFFFFFFFFFFFFFFFFFF, FFFFFFFFFFFFFFFFFFFFFFFFFFFFFFFF: FFFFFFFFFFFFFFFFFF: FFFF  
FFFFFFFFFFFFFFFFFFFFFFFFFFFFFFFFFFFFFFFFFFFFFFFFFFFFFFFFFFFFFFFFFFFF, FFFFFFFFFF  
@A00155:342:HHGFNDSXY:1:1148:29098:3630 2:N:0:GAACCTAG+TCCGCATA  
CACGGTAGGTCGTGAACAAGCCCGGAGTACATCTCCTTTGGA ACCAGGAGACCCCTCCGGTCTTG TCC  
AACCTCTGTTTC GGCAGAGGATACC GTGCTCCACAGCTGTAAGGCTGTGGGCCCGAGAGAAGTCGCTC  
+  
FFFFFFFFFFFFFFFFFFFFFFFFFFFFFFFFFFFFFFFFFFFFFFFFFFFFFFFFFFFFFFFFFFFFF  
FFFFFFFFFFFFFFFFFFFFFFFFFFFFFFFFFFFFFFFFFFFFFFFFFFFFFFFFFFFFFFFFFFFF: FFFFFFFFFF: FFF: FFFFFF  
@A00155:342:HHGFNDSXY:1:1148:5692:6934 2:N:0:GAACCTAG+TCCGCATA  
TTAGGACGAAACTTACACA A CTGAAGAGTAACGACGGTTTCGTCCTTGGAACGGACTCATCAGGGAG  
CCTACTAGACTCCGACCGTCATGGGGGTCAAACCCATGCCCGCTACACCGCCTTAGAT  
+  
FFFFFFFFFFFFFFF, FFFFFFFFFFFFFFFFFFFFFFFFFFFFFFFFFFFFFFFFFFFFFFFFFFFFFFFFFFFFFF  
FFFFFFFFFFFFF: FFFFFFFFFFFFFFFFFFFFFFFF: FF: FFFFFFFFFFFFFFFFFFFFFF: FFFFFFFFFF  
@A00155:342:HHGFNDSXY:1:1148:8947:27038 2:N:0:GAACCTAG+TCCGCATA  
GGACTCGTCAGGTAGCCTACTAGACTACGACTTACACGGTAGGTCGTGAACAAGCCCGGAGTACATCT  
CCTTTGGA ACCAGGAGACCCCTCCGGTCTTG TCCAACCTCTGTTTC GGCAGAGGATACC GTGCTCCAC  
+  
FFFFFFFFFFFFFFFFF: FFFFFFFFFFFFFFFFFFFFFFFFFFFFFFFFFFFFFFFFFFFFFFFFFFFFFFFFFFFFFF  
FFFFFFFFFFFFFFFFFFFFFFFFFFFFFFFFFFFFFFFFFFFFFFFFFFFFFFFFFFFFFFFFFFFFF  
@A00155:342:HHGFNDSXY:1:1148:6542:28260 2:N:0:GAACCTAG+TCCGCATA  
CAGGTAGCCTACTAGACTACGACTTACACGGTAGGTCGTGAACAAGCCCGGAGTACATCTCCTTTGGA  
ACTAGGAGACCCCTCCGGTTTTGTCCAACCTCTGTTTC GGCAGAGGATACC GTGCTCCACAGCTGTAA  
+  
FFFFFFFFFFFFFFFFFFFFFFFFFFFFFFFFFFFFFFFFFFFFFFFFFFFFFFFFFFFFFFFFFFFFF  
FFFFFFFFFFFFFFFFFFFFFFFFFFFFFFFFFFFFFFFFFFFFFFFFFFFFFFFFFFFFFFFFFFFFF  
@A00155:342:HHGFNDSXY:1:1149:27398:2347 2:N:0:GAACCTAG+TCCGCATA  
TAGCCTACTAGACTACGACTTACACGGTAGGTCGTGAACAAGCCCGGAGTACATCTCCTTTGGAACCA  
GGAGACCCCTCCGGTCTTG TCCAACCTCTGTTTC GGCAGAGGATACC GTGCTCCACAGCTGTAAGGCT  
+

[illegible]

[illegible]

FFFFFFFFFFFFFFFFFFFFFFFFFFFFFFFFFFFFFFFFFFFFFFFFFFFFFFFFFFFFFFFFFFFFFFFFFFFF  
FFFF:FFFFFFFFFFFFFFFF,FFFFFFFFFFFFFFFFFFFFFFFFFFFFFFFFFFFFFFFFFFFFFFFFFFFF  
@A00155:342:HHGFNDSXY:1:1156:31792:11992 2:N:0:GAACCTAG+TCCGCATA  
CAGAGGTGAGTCCTTAAGTGGACACAGCTGATCTAAGGCGGTGTGGCGGGGCATGGGTTTGAACCCCC  
ATGACGGTCGGAGTCTAGTAGGCTCCCTGATGAGTCCGTTCCAAGAACGAAACCGTCGTTACTCTTCG  
+  
FFFFFFFFFFFFFFFF:FFFFFFFFFFFFFFFF:FFFFFFFFFFFFFFFF:FFFFFFFF  
FFFFFFFFFFFFFFFFFFFFFFFFFFFFFFFFFFFFFFFFFFFFFFFFFFFFFFFFFFFFFFFFFFFFFFFFFFFF:FFFFFFFF  
@A00155:342:HHGFNDSXY:1:1156:13774:12446 2:N:0:GAACCTAG+TCCGCATA  
AACTAGGAGACCCCTCCGGTCTTGTCCAACCTCTGTTTCGGCAGAGGATACCGTGCTCCACAGCTGTA  
AGGCTGTGGGCCCCGAGAGAAGTCGCTCTCTCGCCCTCCACATCCCTCTCGGCATTGAGATGACCAT  
+  
FFFFFFFFFFFFFFFFFFFFFFFFFFFFFFFFFFFFFFFFFFFFFFFFFFFFFFFFFFFFFFFFFFFFFFFFFFFF  
FFFFFFFFFFFFFFFFFFFFFFFFFFFFFFFFFFFFFFFFFFFFFFFFFFFFFFFFFFFFFFFFFFFFFFFFFFFF  
@A00155:342:HHGFNDSXY:1:1156:16866:20995 2:N:0:GAACCTAG+TCCGCATA  
AAAAGGACTCGTCAGGTAGCCTACTAGACTACGACTTACACGGTAGGTCGTGAACAAGCCCGGAGTAC  
ATCTCCTTTGGAAGTAGGAGACCCCTCCGGTCTTGTCCAACCTCTGTTTCGGCAGAGGATACCGTGCT  
+  
FFFFFFFFFFFFFFFFFFFFFFFFFFFFFFFFFFFFFFFFFFFFFFFFFFFFFFFFFFFFFFFFFFFFFFFFFFFF:FF:F:FFFF  
FFFFFFFFFFFFFFFFFFFFFFFFFFFFFFFFFFFFFFFFFFFFFFFFFFFFFFFFFFFFFFFFFFFFFFFFFFFF  
@A00155:342:HHGFNDSXY:1:1156:10538:34366 2:N:0:GAACCTAG+TCCGCATA  
GGTAGCCTACTAGACTACGACTTACACGGTAGGTCGTGAACAAGCCCGGAGTACATCTCCTTTGGAAC  
TAGGAGACCCCTCCGGTCTTGTCCAACCTCTGTTTCGGCAGAGGATACCGTGCTCCACAGCTGTAAGG  
+  
FFFFFFFFFFFFFFFFFFFFFFFFFFFFFFFFFFFFFFFFFFFFFFFFFFFFFFFFFFFFFFFFFFFFFFFFFFFF  
FFFFFFFFFFFFFFFFFFFFFFFFFFFFFFFFFFFFFFFFFFFFFFFFFFFFFFFFFFFFFFFFFFFFFFFFFFFF:F:  
@A00155:342:HHGFNDSXY:1:1157:32054:7717 2:N:0:GAACCTAG+TCCGCATA  
AAAAGGACTCGTCAGGTAGCCTACTAGACTACGACTTACACGGTAGGTCGTGAACAAGCCCGGAGTAC  
ATCTCCTTTGGAAGTAGGAGACCCCTCCGGTCTTGTCCAACCTCTGTTTCGGCAGAGGATACCGTGCT  
+  
FFFFFFFFFFFFFFFFFFFFFFFFFFFFFFFF:FFFFFFFFFFFFFFFF:FFFFFFFFFFFFFFFFFFFFFFFF  
FFFFFFFFFFFFFFFFFFFFFFFFFFFFFFFF:FFFFFFFFFFFFFFFFFFFFFFFFFFFFFFFFFFFFFFFF  
@A00155:342:HHGFNDSXY:1:1158:24569:10254 2:N:0:GAACCTAG+TCCGCATA  
TCCTAAAAAGGACTCGTCAGGTAGCCTACTAGACTACGACTTACACGGTAGGTCGTGAACAAGCCCGG  
AGTACATCTCCTTTGGAAGTAGGAGACCCCTCCGGTCTTGTCCAACCTCTGTTTCGGCAGAGGATACC  
+  
FFFFFFFFFFFFFFFFFFFFFFFFFFFFFFFF:FFFFFFFFFFFFFFFF:FFFFFFFFFFFFFFFFFFFFFFFF  
FFFFFFFFFFFFFFFFFFFFFFFFFFFFFFFF:FF:F:FFFFFFFFFFFFFFFFFFFFFFFFFFFFFFFF  
@A00155:342:HHGFNDSXY:1:1158:2889:20181 2:N:0:GAACCTAG+TCCGCATA  
ACTTACACGGTAGGTCGTGAACAAGCCCGGAGTACATCTCCTTTGGAAGTAGGAGACCCCTCCGGTCT  
TGTCCAACCTCTGTTTCGGCAGAGGATACCGTGCTCCACAGCTGTAAGGCTGTGGGCCCCGAGAGAAGT  
+  
FFFFFFFFFFFFFFFFFFFFFFFFFFFFFFFF:FFFFFFFFFFFF:FFFFFFFFFFFFFFFFFFFFFFFFFFFF  
:FFFFFFFFFFFFFFFFFFFFFFFFFFFFFFFFFFFFFFFFFFFFFFFFFFFFFFFFFFFFFFFFFFFFFFFFFFFF:  
@A00155:342:HHGFNDSXY:1:1158:2456:20275 2:N:0:GAACCTAG+TCCGCATA  
ACTTACACGGTAGGTCGTGAACAAGCCCGGAGTACATCTCCTTTGGAAGTAGGAGACCCCTCCGGTCT  
TGTCCAACCTCTGTTTCGGCAGAGGATACCGTGCTCCACAGCTGTAAGGCTGTGGGCCCCGAGAGAAGT  
+  
F,FFFFFFFFFFFF:FFFFFFFFFFFFFFFFFFFFFFFFFFFFFFFF:FFFFFFFFFFFFFFFFFFFF:F  
FFFFFFFFFFFFFFFFFFFF,FFFFFFFFFFFFFFFFFFFF:FFF,FFFFFFFFFFFFFFFFFFFFFFFF:FFFF  
@A00155:342:HHGFNDSXY:1:1159:12617:25191 2:N:0:GAACCTAG+TCCGCATA  
ACTTACACGGTAGGTCGTGAACAAGCCCGGAGTACATCTCCTTTGGAACCAGGAGACCCCTCCGGTCT  
TGTCCAACCTCTGTTTCGGCAGAGGATACCGTGCTCCACAGCTGTAAGGCTGTGGGCCCCGAGAGAAGT  
+

```

FFFFFFFFFFFFFFFFFFFFFFFFFFFFFFFFFFFFFFFFFFFFFFFFFFFFFFFFFFFFFFFFFFFFFFFFFFFF:FFF
FFFFFFFFFFFFFFFFFFFFFFFFFFFFFFFFFFFFFFFFFFFFFFFFFFFFFFFFFFFFFFFFFFFFFFFFFFFF@A00155:342:HHGFNDSXY:1:1159:14443:32362 2:N:0:GAACCTAG+TCCGCATA
AAAAGGACTCGTCAGGTAGCCTACTAGACTACGACTTACACGGTAGGTCGTGAACAAGCCCCGGAGTAC
ATCTCCTTTGGAAGTAGGAGACCCCTCCGGTCTTGTCACACCTCTGTTTCGGCAGAGGATACCGTGCT
+
FFFFFFFFFFFFFFFFFFFFFFFFFFFFFFFFFFFFFFFFFFFFFFFFFFFFFFFFFFFFFFFFFFFFFFFFFFFF:FFFFFFFFF
FFFFFFFFFFFFFFFFFFFFFFFFFFFFFFFFFFFFFFFFFFFFFFFFFFFFFFFFFFFFFFFFFFFFFFFFFFFF@A00155:342:HHGFNDSXY:1:1159:4716:35994 2:N:0:GAACCTAG+TCCGCATA
ACATCTCCTTTGGAAGTAGGAGACCCCTCCGGTCTTGTCACACCTCTGTTTCGGCAGAGGATACCGTG
CTCCACAGCTGTAAGGCTGTGGGCCCGAGAGAAGTCGCTCTCTCTCGCCCTCCACATCCCTCTCGGCA
+
FFFFFFFFFFFFFFFFFFFFFFFFFFFFFFFFFFFFFFFFFFFFFFFFFFFFFFFFFFFFFFFFFFFFFFFFFFFF:FFFFFFFFF
FFFFFFFFFFFFFFFFFFFFFFFFFFFFFFFFFFFFFFFFFFFFFFFFFFFFFFFFFFFFFFFFFFFFFFFFFFFF@A00155:342:HHGFNDSXY:1:1160:1497:36652 2:N:0:GAACCTAG+TCCGCATA
TAGGTCGTGAACAAGCCCCGGAGTACATCTCCTTTGGAACCAGGAGACCCCTCCGGTCTTGTCACACCT
CTGTTTCGGCAGAGGATACCGTGCTCCACAGCTGTAAGGCTGTGGGCCCGAGAGAAGTCGCTCTCTCT
+
FFFFFFF,FFFFF,FFFFFFFFFFFFFFFFFFFFFFFFFFFFFFFFFFFFFFFF,FFFFF,FFFFFFFFFFFFFFFFFFFFFFFFF
FFFFFFFFFFFFFFFFFFFFFFFFFFFFFFFFFFFFFFFFFFFFFFFFFFFFFFFFFFFFFFFFFFFFFFFFFFFF:FFFF,FFFFFFFFFF
@A00155:342:HHGFNDSXY:1:1161:8775:1814 2:N:0:GAACCTAG+TCCGCATA
ACTTACACGGTAGGTCGTGAACAAGCCCCGGAGTACATCTCCTTTGGAAGTAGGAGACCCCTCCGGTCT
TGTCCAACCTCTGTTTCGGCAGAGGATACCGTGCTCCACAGCTGTAAGGCTGTGGGCCCGAGAGAAG
+
FFFFFFFFFFFFFFFFFFFFFFFFFFFFFFFFFFFFFFFFFFFFFFFFFFFFFFFFFFFFFFFFFFFFFFFFFFFF:FFFFFFFFF
FFFFFFFFFFFFFFFFFFFFFFFFFFFFFFFFFFFFFFFFFFFFFFFFFFFFFFFFFFFFFFFFFFFFFFFFFFFF,F
@A00155:342:HHGFNDSXY:1:1161:28709:26193 2:N:0:GAACCTAG+TCCGCATA
TAGGTCGTGAACAAGCCCCGGAGTACATCTCCTTTGGAAGTAGGAGACCCCTCCGGTCTTGTCACACCT
CTGTTTCGGCAGAGGATACCGTGCTCCACAGCTGTAAGGCTGTGGGCCCGAGAGAAGTCGCTCTCTCT
+
FFFFFFFFFFFFFFFFFFFFFFFFFFFFFFFFFFFFFFFFFFFFFFFFFFFFFFFFFFFFFFFFFFFFFFFFFFFF:FFFFFFFFF
FFFFFFFFFFFFFFFFFFFFFFFFFFFFFFFFFFFFFFFFFFFFFFFFFFFFFFFFFFFFFFFFFFFFFFFFFFFF,FFFFFFFFFFFF
@A00155:342:HHGFNDSXY:1:1161:21739:30342 2:N:0:GAACCTAG+TCCGCATA
AAAAGGACTCGTCAGGTAGCCTACTAGACTACGACTTACACGGTAGGTCGTGAACAAGCCCCGGAGTAC
ATCTCCTTTGGAAGTAGGAGACCCCTCCGGTCTTGTCACACCTCTGTTTCGGCAGAGGATACCGTGCT
+
FFFFFFFFFFFFFFFFFFFFFFFFFFFFFFFFFFFFFFFFFFFFFFFFFFFFFFFFFFFFFFFFFFFFFFFFFFFF,FFFFFFFFFFFFFFFFF
FFFFFFFFFFFFFFFFFFFFFFFFFFFFFFFFFFFFFFFFFFFFFFFFFFFFFFFFFFFFFFFFFFFFFFFFFFFF@A00155:342:HHGFNDSXY:1:1161:23258:33254 2:N:0:GAACCTAG+TCCGCATA
CAAGGACGAAACCGTCGTTACTCTTGAGATTGTGTAAGTTTCGTCCTAAAAAGGACTCGTCAGGTAGC
CTACTAGACTACGACTTACACGGTAGGTCGTGAACAAGCCCCGGAGTACATCTCCTTTGGAAGTAGGAG
+
FFFFFFFFFFFFFFFFFFFFFFFFFFFFFFFFFFFFFFFFFFFFFFFFFFFFFFFFFFFFFFFFFFFFFFFFFFFF,:FFFFFFFFFFFFFFF,FFFFFFFFFFFFFFFFFFFFFFFFFFFFFFFFFFFFFFFF
FFFFFFFFFFFFFFFFFFFFFFFFFFFFFFFFFFFFFFFFFFFFFFFFFFFFFFFFFFFFFFFFFFFFFFFFFFFF:FF:FFFFF
@A00155:342:HHGFNDSXY:1:1161:3983:36636 2:N:0:GAACCTAG+TCCGCATA
CGACGGTTTTCGTCCTTGGAACGGACTCATCAGGGAGCCTACTAGACTCCGACCGTCATGGGGGTTCAA
ACCCATGCCCCGCCACACCGCCTTAGATCAGCTGTGTCCACTTAAGGACTCACCTCTGGCCTATGGTC
+
FFFFFFFFFFFFFFFFFFFFFFFFFFFFFFFFFFFFFFFFFFFFFFFFFFFFFFFFFFFFFFFFFFFFFFFFFFFF,FFFFFFFFFFFFFFFFF
FFFFFFFFFFFFFFFFFFFFFFFFFFFFFFFFFFFFFFFFFFFFFFFFFFFFFFFFFFFFFFFFFFFFFFFFFFFF:FFFFFFFFFFFFFFFFF
@A00155:342:HHGFNDSXY:1:1162:7798:10864 2:N:0:GAACCTAG+TCCGCATA
TACGACTTACACGGTAGGTCGTGAACAAGCCCCGGAGTACATCTCCTTTGGAAGTAGGAGACCCCTCCG
GTCTTGTCACACCTCTGTTTCGGCAGAGGATACCGTGCTCCACAGCTGTAAGGCTGTGGGCCCGAGAG
+

```



```

FFFFFFFFFFFFFFFFFFFFFFFFFFFFFFFFFFFFFFFFFFFFFFFFFFFFFFFFFFFFFFFFFFFFF:FFFFFFFFFFFFFFFFFFFFFFFFFFFFFFFFFFFFFFFFFFFFFFFFFFFFFFFFFFFFFFFFFFFFF
FFFFFFFFFFFFFFFFFFFFFFFFFFFFFFFFFFFFFFFFFFFFFFFFFFFFFFFFFFFFFFFFFFFFFFFFFFFFF, FFFFFFFFFFFFFFFFFFFFFFFFFFFFFFFFFFFFFFFFFFFFFFFFFFFFFFFFFFFFFFFFFFFFFF
@A00155:342:HHGFNDSXY:1:1162:23827:21433 2:N:0:GAACCTAG+TCCGCATA
GTGAACAAGCCCCGGAGTAGCATCTCCTTTGGAACCAGGAGACCCCCTCCGGTCTTGTC AACCTCTGTTTT
CGGCAGAGGATACCGTGCTCCACAGCTGTAAGGCTGTGGGCCCGAGAGAAGTCGCTCTCTCTCGCC
+
FFFFFFFFFFFFFFFFFFFFFFFFFFFFFFFFFFFFFFFFFFFFFFFFFFFFFFFFFFFFFFFFFFFFFFF:FFFFFFFFFFFFFFFFFFFFFFFFFFFFFFFFFFFFFFFFFFFFFFFFFFFFFFFFFFFFFFFFFFFFF
FFFFFFFF:F:FFFFFFFFFFFFFFFFFFFFFFFFFFFFFFFFFFFFFFFFFFFFFFFFFFFFFFFFFFFFFFFFFFFFF:FFFFFFFFFFFFFFFFFFFFFFFFFFFFFFFFFFFFFFFFFFFFFFFFFFFFFFFFFFFFFFFFFFFFF
@A00155:342:HHGFNDSXY:1:1163:25943:3458 2:N:0:GAACCTAG+TCCGCATA
AAAAGGACTCGTCAGGTAGCCTACTAGACTACGACTTACACGGTAGGTCGTGAACAAGCCCCGGAGTAGC
ATCTCCTTTGGAAGTACGAGACCCCCTCCGGTCTTGTC AACCTCTGTTTTCGGCAGAGGATACCGTGCT
+
FFFFFFFFFFFFFFFFFFFFFFFFFFFFFFFFFFFFFFFFFFFFFFFFFFFFFFFFFFFFFFFFFFFFFFF:FFFFFFFFFFFFFFFFFFFFFFFFFFFFFFFFFFFFFFFFFFFFFFFFFFFFFFFFFFFFFFFFFFFFF
FFFFFFFFFFFFFFFFFFFFFFFFFFFFFFFFFFFFFFFFFFFFFFFFFFFFFFFFFFFFFFFFFFFFFFFFFFFFF:FFFFF
@A00155:342:HHGFNDSXY:1:1163:7952:29637 2:N:0:GAACCTAG+TCCGCATA
TTTCGTCCTAAAAAGGACTCGTCAGGTAGCCTACTAGACTACGACTTACACGGTAGGTCGTGAACAAG
CCCCGAGTACATCTCCTTTGGAACCAGGAGACCCCCTCCGGTCTTGTC AACCTCTGTTTCGGCAGAGG
+
FFFFFFFF,F:FFFFFFFFFFFFFFFFFFFFFFFFFFFFFFFFFFFFFFFFFFFFFFFFFFFFFFFFFFFFFFFFFFFFF
FFFFFFFFFFFFFFFFFFFFFFFFFFFFFFFFFFFFFFFFFFFFFFFFFFFFFFFFFFFFFFFFFFFFFFFFFFFFF:FFFFFFFFFFFFFFFFFFFFFFFFFFFFFFFFFFFFFFFFFFFFFFFFFFFFFFFFFFFFFFFFFFFFF
@A00155:342:HHGFNDSXY:1:1164:7355:29387 2:N:0:GAACCTAG+TCCGCATA
AAAAGGACTCGTCAGGTAGCCTACTAGACTACGACTTACACGGTAGGTCGTGAACAAGCCCCGGAGTAGC
ATCTCCTTTGGAACCAGGAGACCCCCTCCGGTCTTGTC AACCTCTGTTTCGGCAGAGGATACCGTGCT
+
FF:FFFFFFFFFFFFFFFFFFFFFFFFFFFFFFFFFFFFFFFFFFFFFFFFFFFFFFFFFFFFFFFFFFFFFFF,FFFFFFFFFFFFFFFFFFFFFFFFFFFFFFFFFFFFFFFFFFFFFFFFFFFFFFFFFFFFFFFFFFFFF
FFFFFFFFFFFFFFFFFFFFFFFFFFFFFFFFFFFFFFFFFFFFFFFFFFFFFFFFFFFFFFFFFFFFFFFFFFFFF:FFFFFFFFFFFFFFFFFFFFFFFFFFFFFFFFFFFFFFFFFFFFFFFFFFFFFFFFFFFFFFFFFFFFF
@A00155:342:HHGFNDSXY:1:1165:31530:25598 2:N:0:GAACCTAG+TCCGCATA
GAGACCCCCTCCGGTCTTGTC AACCTCTGTTTCGGCAGAGGATACCGTGCTCCACAGCTGTAAGGCTG
TGGGCCCGAGAGAAGTCGCTCTCTCTCGCCCTCCACATCCCTCTCGGCATTGAGATGAC
+
FFFFFFFFFFFFFFFFFFFFFFFFFFFFFFFFFFFFFFFFFFFFFFFFFFFFFFFFFFFFFFFFFFFFFFF:FFFFFFFFFFFFFFFFFFFFFFFFFFFFFFFFFFFFFFFFFFFFFFFFFFFFFFFFFFFFFFFFFFFFF:FFF:F
FFFFFFFFFFFFFFFFFFFFFFFFFFFFFFFFFFFFFFFFFFFFFFFFFFFFFFFFFFFFFFFFFFFFFFFFFFFFF::FFFFFFFFFFFFFFFFFFFFFFFFFFFFFFFFFFFFFFFFFFFFFFFFFFFFFFFFFFFFFFFFFFFFF,FFFFFFFFFFFFFFFF
@A00155:342:HHGFNDSXY:1:1167:3188:1282 2:N:0:GAACCTAG+TCCGCATA
AAAAGGACTCGTCAGGTAGCCTACTAGACTACGACTTACACGGTAGGTCGTGAACAAGCCCCGGAGTAGC
ATCTCCTTTGGAAGTACGAGACCCCCTCCGGTCTTGTC AACCTCTGTTTCGGCAGAGGATACCGTGCT
+
FFFFFFFFFFFFFFFFFFFFFFFFFFFFFFFFFFFFFFFFFFFFFFFFFFFFFFFFFFFFFFFFFFFFFFF:FFFFFFFFFFFFFFFFFFFFFFFFFFFFFFFFFFFFFFFFFFFFFFFFFFFFFFFFFFFFFFFFFFFFF,FFFFF,F:FFFFFFFF:FF
FFFFFFFF:FFFFFFFFFFFFFFFFFFFFFFFFFFFFFFFFFFFFFFFFFFFFFFFFFFFFFFFFFFFFFFFFFFFFF:FFFFFFFFFFFFFFFFFFFFFFFFFFFFFFFFFFFFFFFFFFFFFFFFFFFFFFFFFFFFFFFFFFFFF:FFFFFFFFFFFFF
@A00155:342:HHGFNDSXY:1:1167:17445:3803 2:N:0:GAACCTAG+TCCGCATA
CGTCCTAAAAAGGACTCGTCAGGTAGCCTACTAGACTACGACTTACACGGTAGGTCGTGAACAAGCCC
GGAGTACATCTCCTTTGGAAGTACGAGACCCCCTCCGGTCTTGTC AACCTCTGTTTCGGCAGAGGATA
+
FFFFFFFFFFFFFFFFFFFFFFFFFFFFFFFFFFFFFFFFFFFFFFFFFFFFFFFFFFFFFFFFFFFFFFF,:FFF::FFFFFFFFFFFFFFFFFFFFFFFFFFFFFFFFFFFFFFFFFFFFFFFFFFFFFFFFFFFFFFFFFFFFF:FFFF
FFFFFFFFFFFFFFFFFFFFFFFFFFFFFFFFFFFFFFFFFFFFFFFFFFFFFFFFFFFFFFFFFFFFFFFFFFFFF:FFFFFFFFFFFFFFFFFFFFFFFFFFFFFFFFFFFFFFFFFFFFFFFFFFFFFFFFFFFFFFFFFFFFF:FFFFF
@A00155:342:HHGFNDSXY:1:1167:15031:11835 2:N:0:GAACCTAG+TCCGCATA
AGGACGAAACCGTCGTTACTCTTTGAGTTGTGTAAGTTTCGTCCTAAAAAGGACTCGTCAGGTAGCCT
ACTAGACTACGACTTACACGGTAGGTCGTGAACAAGCCCCGGAGTACATCTCCTTTGGAAGTACGAGAC
+
FFFFFFFFFFFFFFFFFFFFFFFFFFFFFFFFFFFFFFFFFFFFFFFFFFFFFFFFFFFFFFFFFFFFFFF:,FFFFFFFFFFFFFFFFFFFFFFFFFFFFFFFFFFFFFFFFFFFFFFFFFFFFFFFFFFFFFFFFFFFFF,FFFFFFFFFFFFFFFF
FFFFFFFFFFFFFFFFFFFFFFFFFFFFFFFFFFFFF:FFFFFFFFFFFFFFFFFFFFFFFFFFFFFFFFFFFFFFFFFFFFFFFFFFFFFFFFFFFFFFFFFFFFF,FFFFFFFFFFFFFFFF
@A00155:342:HHGFNDSXY:1:1167:20546:14998 2:N:0:GAACCTAG+TCCGCATA
GGACTCGTCAGGTAGCCTACTAGACTACGACTTACACGGTAGGTCGTGAACAAGCCCCGGAGTACATCT
CCTTTGGAAGTACGAGACCCCCTCTGGTCTTGTC AACCTCTGTTTCGGCAGAGGATACCGTGCTCCAC
+
```

[illegible]

FFFFFFFFFFFFFFFFFFFFFFFFFFFFFFFFFFFFFFFFFFFFFFFFFFFFFFFFFFFFFFFFFFFFFFFF:FFF  
FFFFFFFFFFFFFFFFFFFFFFFFFFFFFFFFFFFFFFFFFFFFFFFFFFFFFFFFFFFFFFFFFFFFFFFFF  
@A00155:342:HHGFNDSXY:1:1170:15691:1611 2:N:0:GAACCTAG+TCCGCATA  
GTGAACAAGCCCGGAGTACATCTCCTTTGGAAGTACGAGACCCCTCCGGTCTTGTCCAACCTCTGTTT  
CGGCAGAGGATACCGTGCTCCACAGCTGTAAGGCTGTGGGCCCGAGAGAAGTCGCTCTCTCTCGCC  
+  
FFFFFFFFFFFFFFFFFFFFFFFFFFFFFFFFFFFFFFFFFFFFFFFFFFFFFFFFFFFFFFFFFFFFFFFFF,FFFFFFFFFFFFFFFFFFFFFFFFFFFFFFFFFFFFFFFFFFFFFFFFF  
FFFFFFFFFFFFFFFFFFFFFFFFFFFFFFFFFFFFFFFFFFFFFFFFFFFFFFFFFFFFFFFFFFFFFFFFF  
@A00155:342:HHGFNDSXY:1:1170:19985:13088 2:N:0:GAACCTAG+TCCGCATA  
GGACTCGTCAGGTAGCCTACTAGACTACGACTTACACGGTAGGTCGTGAACAAGCCCGGAGTACATCT  
CCTTTGGAAGTACGAGACCCCTCCGGTCTTGTCCAACCTCTGTTTCGGCAGAGGATACCGTGCTCCAC  
+  
FFFFFFFFFFFFFFFFFFFFFFFFFFFFFFFFFFFFFFFFFFFFFFFFFFFFFFFFFFFFFFFFFFFFFFFFF  
FFFFFFFFFFFFFFFFFFFFFFFFFFFFFFFFFFFFFFFFFFFFFFFFFFFFFFFFFFFFFFFFFFFFFFFFF,FFFFFFFFFFFFFFFFFFFFFFFFFFFFFFFFFFFFFFFFFFFFFFFFF  
@A00155:342:HHGFNDSXY:1:1170:2474:13730 2:N:0:GAACCTAG+TCCGCATA  
GCTGTGTCCACTTAAGGACTCACCTCTGGCCTATGGTCATCTCAATGCCGAGAGGGATGTGGAGGGCG  
AGAGAGAGCGACTTCTCTCGGGCCACAGCCTTACAGCTGTGGAGCACGGTATCCTCTGCCGAAACAG  
+  
FFFFFFFFFFFFFFFFFFFFFFFFFFFFFFFFFFFFFFFFFFFFFFFFFFFFFFFFFFFFFFFFFFFFFFFFF  
FFFFFFFFFFFFFFFFFFFFFFFFFFFFFFFFFFFFFFFFFFFFFFFFFFFFFFFFFFFFFFFFFFFFFFFFF:FFFFFFFFFFFFFFFFFFFFFFFFFFFFFFFFFFFFFFFFFFFFFFFFF  
@A00155:342:HHGFNDSXY:1:1170:29478:22263 2:N:0:GAACCTAG+TCCGCATA  
GGACTCGTCAGGTAGCCTACTAGACTACGACTTACACGGTAGGTCGTGAACAAGCCCGGAGTACATCT  
CCTTTGGAAGTACGAGACCCCTCCGGTCTTGTCCAACCTCTGTTTCGGCAGAGGATACCGTGCTCCAC  
+  
FFFFFFFFFFFFFFFFFFFFFFFFFFFFFFFFFFFFFFFFFFFFFFFFFFFFFFFFFFFFFFFFFFFFFFFFF:FFFFFFF:FFFFFFFFFFFFFFFFFFFFFFFFF  
FFFFFFFFFFFFFFFFFFFFFFFFFFFFFFFFFFFFFFFFFFFFFFFFFFFFFFFFFFFFFFFFFFFFFFFFF  
@A00155:342:HHGFNDSXY:1:1170:7202:30655 2:N:0:GAACCTAG+TCCGCATA  
CACGGTAGGTCGTGAACAAGCCCGGAGTACATCTCCTTTGGAAGTACGAGACCCCTCCGGTCTTGTCC  
AACCTCTGTTTCGGCAGAGGATACCGTGCTCCACAGCTGTAAGGCTGTGGGCCCGAGAGAAGTCGCTC  
+  
F:FF,FFFFFFFFFFFFFFFF:FFF,FFFFFFFFFFFFFFFFFFFFFFFF:FF:, :FFFF, , :FFFF, F:FFF  
FFFFFFFF:FFFFFFFFFFFFFFFFF,FFFFFFFFFFFFFFFF:FFFFFFFFFFFFFFFFFFFFFFFFFFFFFFFFF  
@A00155:342:HHGFNDSXY:1:1171:31738:16626 2:N:0:GAACCTAG+TCCGCATA  
ACTAGACTACGACTTACACGGTAGGTCGTGAACAAGCCCGGAGTACATCTCCTTTGGAAGTACGAGAC  
CCCTCCGGTCTTGTCCAACCTCTGTTTCGGCAGAGGATACCGTGCTCCACAGCTGTAAGGCTGTGGGC  
+  
FFFFFFFFFFFFFFFFFFFFFFFFFFFFFFFFFFFFFFFFFFFFFFFFFFFFFFFFFFFFFFFFFFFFFFFFF  
FFFFFFFFFFFF, :FFFFFFFFFFFFFFFFFFFFFFFFFFFFFFFFFFFFFFFFF,FFFFFFFF:FFFFF: :FFFFFFFFF  
@A00155:342:HHGFNDSXY:1:1171:30761:21950 2:N:0:GAACCTAG+TCCGCATA  
TCTACGAGTTGTGTAAGTTTCGTCTAAAAAGGACTCGTCAGGTAGCCTACTAGACTACGACTTACAC  
GGTAGGTCGTGAACAAGCCCGGAGTACATCTCCTTTGGAAGTACGAGACCCCTCCGGTCTTGTCCAAC  
+  
FFF:FFFFFFFF:FFFFFFFFFFFFFFFFFFFFFFFFFFFFFFFF:FFFFFF:FFFFFFFFFFFFFFFF:FFFFFFFFF  
FFFFFFFFFFFFFFFFFFFFFFFFFFFFFFFFFFFFFFFFFFFFFFFFFFFFFFFFFFFFFFFFFFFFFFFFF  
@A00155:342:HHGFNDSXY:1:1172:27850:6261 2:N:0:GAACCTAG+TCCGCATA  
TGTGTAAGTTTCGTCTAAAAAGGACTCGTCAGGTAGCCTACTAGACTACGACTTACACGGTAGGTCG  
TGAACAAGCCCGGAGTACATCTCCTTTGGAACCAGGAGACCCCTCCGGTCTTGTCCAACCTCTGTTTC  
+  
FFFFFFFFF,FFFFFFFFFFFFFFFFFFFFFFFFFFFFFFFFFFFFFFFFFFFFFFFFFFFFFFFFFFFFFFFFF  
FFFFFFFFFFFFFFFFFFFFFFFFFFFFFFFFFFFFFFFFFFFFFFFFFFFFFFFFFFFFFFFFFFFFFFFFF  
@A00155:342:HHGFNDSXY:1:1173:12066:3599 2:N:0:GAACCTAG+TCCGCATA  
GGACTCGTCAGGTAGCCTACTAGACTACGACTTACACGGTAGGTCGTGAACAAGCCCGGAGTACATCT  
CCTTTGGAACCAGGAGACCCCTCCGGTCTTGTCCAACCTCTGTTTCGGCAGAGGATACCGTGCTCCAC  
+

[illegible]

FFFFFFFFFFFFFFFFFFFFFFFFFFFFFFFFFFFFFFFFFFFFFFFFFFFFFFFFFFFFFFFFFFFFFFFF  
FFFFFFFFFFFFFFFFFFFFFFFFFFFFFFFFFFFFFFFFFFFFFFFFFFFFFFFFFFFFFFFFFFFFFFFF:FFFFFFFFFFFFFFFFFFFFFFFF  
@A00155:342:HHGFNDSXY:1:1176:19750:22169 2:N:0:GAACCTAG+TCCGCATA  
ACGGTAGGTCGTGAACAAGCCCGGAGTACATCTCCTTTGGAAGTACAGAGACCCCTCCGGTCTTGTCCA  
ACCTCTGTTTCGGCAGAGGATACCGTGCTCCACAGCTGTAAGGCTGTGGGCCCGAGAGAAGTCGCTCT  
+  
FFFFFFFFFFFFFFFFFFFFFFFFFFFFFFFFFFFFFFFFFFFFFFFFFFFFFFFFFFFFFFFFFFFFFFFF:FFFFFFFFFFFFFFFFFFFFFFFF  
FFFFFFFFFFFFFFFFFFFFFFFFFFFFFFFFFFFFFFFFFFFFFFFFFFFFFFFFFFFFFFFFFFFFFFFF:FFFFFFFFFFFFFFFFFFFFFFFF  
@A00155:342:HHGFNDSXY:1:1176:25174:28995 2:N:0:GAACCTAG+TCCGCATA  
TACACGGTAGGTCGTGAACAAGCCCGGAGTACATCTCCTTTGGAAGTACAGAGACCCCTCCGGTCTTGT  
CCAACCTCTGTTTCGGCAGAGGATACCGTGCTCCACAGCTGTAAGGCTGTGGGCCCGAGAGAAGTCGC  
+  
FFFFFFFFFFFFFFFFFFFFFFFFFFFFFFFF:FFFFF:FFFFFFFFFFFFFFFFFFFFFFFFFFFFFFFFFFFFFFFFFFFFFFFFFFFFFFFF:FFF  
FFFFFFFFFFFFFFFFFFFFFFFFFFFFFFFFFFFFFFFFFFFFFFFFFFFFFFFFFFFFFFFFFFFFFFFF:FFFFFFFFFFFFFFFFFFFFFFFF  
@A00155:342:HHGFNDSXY:1:1177:16288:12884 2:N:0:GAACCTAG+TCCGCATA  
CCATGCCCCACCACACCGCCTTAGATCAGCTGTGTCCACTTAAGGACTCACCTCTGGCCTATGGTCAT  
CTCAATGCCGAGAGGGATGTGGAGGGCGAGAGAGAGCGACTTCTCTCGGGCCCACAGCCTTACAGCTG  
+  
FFFFFFFFFFFFFFFFFFFFFFFFFFFFFFFF:FFFFFFFFFFFFFFFF:FFFFFFFFFFFFFFFFFFFFFFFFFFFFFFFFFFFFFFFFFFFFFFFF  
FFFFFFFFFFFFFFFFFFFFFFFFFFFFFFFF,FFFFFFFFFFFFFFFF:FFFFFFFFFFFFFFFFFFFFFFFFFFFFFFFFFFFFFFFF,FFFFFFF  
@A00155:342:HHGFNDSXY:1:1177:31702:13714 2:N:0:GAACCTAG+TCCGCATA  
AAAAGGACTCGTCAGGTAGCCTACTAGACTACGACTTACACGGTAGGTCGTGAACAAGCCCGGAGTAC  
ATCTCCTTTGGAATTAGGAGACCCCTCCGGTCTTGTCCAACCTCTGTTTCGGCAGAGGATACCGTGCT  
+  
FFFFFFFFFFFFFFFFFFFFFFFF:FFFFFFFFFFFFFFFFFFFFFFFF:FFFFFFFFFFFFFFFFFFFFFFFFFFFFFFFFFFFFFFFFFFFFFFFF  
FFFFFFFFFFFFFFFF,FFFFFFFFFFFFFFFFFFFFFFFF,FFFFF:FFFFF,FFFFFFFFFFFFFFFFFFFFFFFFFFFFFFFF  
@A00155:342:HHGFNDSXY:1:1177:32850:24940 2:N:0:GAACCTAG+TCCGCATA  
ACTACGACTTACACGGTAGGTCGTGAACAAGCCCGGAGTACATCTCCTTTGGAACCAGGAGACCCCTC  
CGGTCTTGTCCAACCTCTGTTTCGGCAGAGGATACCGTGCTCCACAGCTGTAAGGCTGTGGGCCCGAG  
+  
FFFFFFFFFFFFFFFFFFFFFFFFFFFFFFFF:FFFFFFFFFFFFFFFFFFFFFFFFFFFFFFFF:FFFFFFFFFFFFFFFF,FFFFF:FFFFFFFF  
FFFFF,:FFFFFFFFFFFFFFFFFFFFFFFFFFFFFFFFFFFFFFFFFFFFFFFFFFFFFFFFFFFFFFFFFFFFFFFFFFFFFFFF  
@A00155:342:HHGFNDSXY:1:1178:28619:9690 2:N:0:GAACCTAG+TCCGCATA  
ACTTAAAGACTCACCTCTGGCCTATGGTCATCTCAATGCCGAGAGGGATGTGGAGGGCGAGAGAGAGC  
GACTTCTCTCGGGCCCACAGCCTTACAGCTGTGGAGCACGGTATCCTCTGCCGAAACAGAGGTTGGAC  
+  
FFF:FFFFF:FFFFF:FFFFF:FFFF:FFFFFFFFFFFFFFFF:FFFF,FF:FFFFFFFFFFFFFFFF  
FFFFFFFF:FFF,FFFFFFFFFFFFFFFFFFFFFFFFFFFFFFFF,F:FFFFFFFF:FFFFFFFFFFFFFFFF,FFFF  
@A00155:342:HHGFNDSXY:1:1178:11216:17566 2:N:0:GAACCTAG+TCCGCATA  
GAACTAGGAGACCCCTCCGGTCTTGTCCAACCTCTGTTTCGGCAGAGGATACCGTGCTCCACAGCTGT  
AAGGCTGTGGGCCCGAGAGAAGTCGCTCTCTCTCGCCCTCCACATCCCTCTCGGCATTGAGATGACCA  
+  
FFFFFFFFF:FFFFFFFFFFFFFFFFFFFFFFFFFFFFFFFFFFFFFFFFFFFFFFFFFFFFFFFFFFFFFFFF  
FFFFF:FFFFFFFFFFFFFFFFFFFFFFFFFFFFFFFFFFFFFFFFFFFFFFFFFFFFFFFFFFFFFFFFFFFFFFFF  
@A00155:342:HHGFNDSXY:1:1178:2790:30499 2:N:0:GAACCTAG+TCCGCATA  
CACGGTAGGTCGTGAACAAGCCCGGAGTACATCTCCTTTGGAAGTACAGAGACCCCTCCGGTCTTGTCC  
AACCTCTGTTTCGGCAGAGGATACCGTGCTCCACAGCTGTAAGGCTGTGGGCCCGAGAGAAGTCGCTC  
+  
FFFFFFFFFFFFFFFFFFFFFFFFFFFFFFFFFFFFFFFFFFFFFFFFFFFFFFFFFFFFFFFFFFFFFFFF:FFFFF,FFFFFFFFFFFFFFFF  
FFFFFFFFFFFFFFFFFFFFFFFF,FFFFFFFF:FFFFFFFFFFFFFFFFFFFFFFFFFFFFFFFFFFFFFFFF,FFFFFFFF  
@A00155:342:HHGFNDSXY:1:1201:20546:3474 2:N:0:GAACCTAG+TCCGCATA  
AAAAGGACTCGTCAGGTAGCCTACTAGACTACGACTTACACGGTAGGTCGTGAACAAGCCCGGAGTAC  
ATCTCCTTTGGAAGTACAGAGACCCCTCCGGTCTTGTCCAACCTCTGTTTCGGCAGAGGATACCGTGCT  
+

FFFFFFFFF:FFFFFFFFFFFFFFFFFFFFFFFFFFFFFFFFFFFFFFFFFFFFFFFFFFFFFFFFFFFFFFFF  
FFFFFFF:FFFFFFFFFFFFFFFFFFFFFFFFFFFFFFFFFFFFFFFFFFFFFFFFFFFFFFFFFFFFFFFF  
@A00155:342:HHGFNDSXY:1:1201:32280:5447 2:N:0:GAACCTAG+TCCGCATA  
GTGTAAGTTTCGTCCTAAAAAGGACTCGTCAGGTAGCCTACTAGACTACGACTTACACGGTAGGTCGT  
GAACAAGCCCGGAGTACATCTCCTTTGGAAGTACGAGACCCCTCCGGTCTTGTCCAACCTCTGTTTCG  
+  
FFFF:FFF,FF:FFFFFF:FFFFFFFFFFFFFFFFFFFFFFFFFFFFFFFFFFFFFFFFFFFFFFFFFFFFF:FFFF:FFFFFF  
FFFFFFFFFFFFFFFFFFFFF:FFFFFFFFFFFFFFFFFFFFFFFFFFFFFFFFFFFFFFFFFFFFFFFFFFFFF:FFFF,FFFFFFFFFFFFF  
@A00155:342:HHGFNDSXY:1:1201:18710:17362 2:N:0:GAACCTAG+TCCGCATA  
GTCAGGTAGCCTACTAGACTACGACTTACACGGTAGGTCGTGAACAAGCCCGGAGTACATCTCCTTTG  
GAACCAGGAGACCCCTCCGGTCTTGTCCAACCTCTGTTTCGGCAGAGGATACCGTGCTCCACAGCTG  
+  
,,FFF::FFFF,,F:FFF,F:FFFF,FFFF,,,FFF,,F,FF,FFF,,:,FFF,FF,FFF,,,::F,  
FFF:F:FFFFFFFFF,F,,FFF,F:::FFF,FFF:F:F::,F,F,FFFFFFFF:F,,FF:F:::,F:  
@A00155:342:HHGFNDSXY:1:1201:26205:18662 2:N:0:GAACCTAG+TCCGCATA  
GTCCTAAAAAGGACTCGTCAGGTAGCCTACTAGACTACGACTTACACGGTAGGTCGTGAACAAGCCCG  
GAGTACATCTCCTTTGGAAGTACGAGACCCCTCCGGTCTTGTCCAACCTCTGTTTCGGCAGAGGATAC  
+  
FFFFFFFFFFFFFFFFFFFFFFFFFFFFFFFFFFFFFFFFFFFFFFFFFFFFFFFFFFFFFFFFFFFFFFFFF  
FFFFFFFFFFFFFFFFFFFFF,FFFFFFFFFFFFFFFFFFFFFFFFFFFFFFFFFFFFFFFFFFFFFFFFFFFFF  
@A00155:342:HHGFNDSXY:1:1201:10963:25269 2:N:0:GAACCTAG+TCCGCATA  
CAAGGACGAAACCGTCGTTACTCTTCGAGTTGTGTAAGTTTCGTCCTAAAAAGGACTCGTCAGGTAGC  
CTACTAGACTACGACTTACACGGTAGGTCGTGAACAAGCCCGGAGTACATCTCCTTTGGAAGTACGAG  
+  
FFFFFFFFFFFFFFF:FFFFFFFFFFFFF:FFFFFFFFFFFFFFFFFFFFF:FFFFFFFFFFFFF::FFFFFFFF:F:FFFFFFF  
FFFFFFFFFFFFFFFFFFFFFFFFFFFFFFFFFFFFFFFFFFFFFFFFFFFFFFFFFFFFFFFFFFFFFFFFF:F:FFFFFFFFFFFFFFFFFFFFF  
@A00155:342:HHGFNDSXY:1:1202:12147:25379 2:N:0:GAACCTAG+TCCGCATA  
TCGTGAACAAGCCCGGAGTACATCTCCTTTGGAAGTACGAGACCCCTCCGGTCTTGTCCAACCTCTGT  
TTCGGCAGAGGATACCGTGCTCCACAGCTGTAAGGCTGTGGGCCCGAGAGAAGTCGCTCTCTCTCGCC  
+  
FFFFFFFFFFFFFFFFFFFFFFFFFFFFFFFFFFFFFFFFFFFFFFFFFFFFFFFFFFFFFFFFFFFFFFFFF  
FFFFFFFFFFFFFFFFFFFFFFFFFFFFFFFFFFFFFFFFFFFFFFFFFFFFFFFFFFFFFFFFFFFFFFFFF  
@A00155:342:HHGFNDSXY:1:1202:2130:34272 2:N:0:GAACCTAG+TCCGCATA  
ACATCTCCTTTGGAAGTACGAGACCCCTCCGGTCTTGTCCAACCTCTGTTTCGGCAGAGGATACCGTG  
CTCCACAGCTGTAAGGCTGTGGGCCCGAGAGAAGTCGCTCTCTCTCGTCCTCCACATCCCTCTCGGCA  
+  
FFFFFFFFFFFFFFFFFFFFF:FFFFFFFFFFFFFFFFFFFFFFFFFFFFFFFFFFFFFFFFFFFFFFFFFFFFF:FFFF:FFFFFFFFFFFFF  
FFFFFFFFFFFFFFFFFFFFFFFFFFFFFFFFFFFFFFFFFFFFFFFFFFFFFFFFFFFFFFFFFFFFFFFFF  
@A00155:342:HHGFNDSXY:1:1202:6207:34788 2:N:0:GAACCTAG+TCCGCATA  
TCGTCCTAAAAAGGACTCGTCAGGTAGCCTACTAGACTACGACTTACACGGTAGGTCGTGAACAAGCC  
CGGAGTACATCTCCTTTGGAAGTACGAGACCCCTCCGGTCTTGTCCAACCTCTGTTTCGGCAGAGGAT  
+  
FFFFFFFFFFFFFFFFFFFFFFFFFFFFFFFFFFFFFFFFFFFFFFFFFFFFFFFFFFFFFFFFFFFFFFFFF  
FFFFFFFFFFFFFFFFFFFFFFFFFFFFFFFFFFFFFFFFFFFFFFFFFFFFFFFFFFFFFFFFFFFFFFFFF  
@A00155:342:HHGFNDSXY:1:1202:6804:35509 2:N:0:GAACCTAG+TCCGCATA  
GGACTCGTCAGGTAGCCTACTAGACTACGACTTACACGGTAGGTCGTGAACAAGCCCGGAGTACATCT  
CCTTTGGAAGTACGAGACCCCTCCGGTCTTGTCCAACCTCTGTTTCGGCAGAGGATACCGTGCTCCAC  
+  
FFFFFFFFFFF:FFFFFFFFFFFFFFFFFFFFFFFFFFFFFFFFFFFFFFFFFFFFFFFFFFFFFFFFFFFFF  
FFFFFFFFFFFFFFFFFFFFFFFFFFFFFFFFFFFFFFFFFFFFFFFFFFFFFFFFFFFFFFFFFFFFFFFFF,FFFFFFFF,F  
@A00155:342:HHGFNDSXY:1:1203:31629:9330 2:N:0:GAACCTAG+TCCGCATA  
GAAACCGTCGTTACTCTTCGAGTTGTGTAAGTTTCGTCCTAAAAAGGACTCGTCAGGTAGCCTACTAG  
ACTACGACTTACACGGTAGGTCGTGAACAAGCCCGGAGTACATCTCCTTTGGAAGTACGAGACCCCTC  
+

```
FF FFFF FFFF FFFF FFFF FFFF FFFF F:F:FFFFFFFFFFFFFFFFFFFFF,FFFF:F:FFFFFF:FF  
FFFFFFFFFFFFFFFFFFFFFFFFFFFFFFFFFFFFFFFFFFFFFFFFFFFFFFFFFFFFFFFFFFFFFFFFFFFFFFFF:  
@A00155:342:HHGFNDSXY:1:1203:27208:15107 2:N:0:GAACCTAG+TCCGCATA  
AGTCCGTTCCAAGGACGAAACCGTCGT TACTCTTTGAGTTGTGTAAGTTTCGTCCTAAAAAGGACTCG  
TCAGGTAGCCTACTAGACTACGACTTACACGGTAGGTCGTGAACAAGCCCCGGAGTACATCTCCTTTGG  
+  
FFFFFFFFFFFFFF:FFFFFFFFFFFFFFFFFFFFFFFFFFFFFFFFFFFFFFFFFFFFFFFFFFFFFFFFFFFFFFF  
FFFFFFFF:FFFFFFFF:FFFFFFFFFFFFFFFFFFFFFFFFFFFFFFFFFFFFFFFFFFFFFFFFFFFFFFFF:FFF  
@A00155:342:HHGFNDSXY:1:1203:26856:15186 2:N:0:GAACCTAG+TCCGCATA  
AGTCCGTTCCAAGGACGAAACCGTCGT TACTCTTTGAGTTGTGTAAGTTTCGTCCTAAAAAGGACTCG  
TCAGGTAGCCTACTAGACTACGACTTACACGGTAGGTCGTGAACAAGCCCCGGAGTACATCTCCTTTG  
+  
FFFFFFFFFFFFFFFFFFFFFFFFFFFF:F: ,FFFFFFFFFFFF,F:,FFFFFF,FFFFFF:FFFF:  
FFFFFFFFFFFFFFFFFFFFFFFFFFFFFFFFFFFFFFFFFFFFFFFFFFFFFFFFFFFFFFFFFFFFFFFFFFFFF  
@A00155:342:HHGFNDSXY:1:1203:7735:19335 2:N:0:GAACCTAG+TCCGCATA  
AAGTTTCGTCCTAAAAAGGACTCGTCAGGTAGCCTACTAGACTACGACTTACACGGTAGGTCGTGAAC  
AAGCCCCGGAGTACATCTCCTTTGGAACCAGGAGACCCCCTCCGGTCTTGTC AACCTCTGTTTCGGCAG  
+  
FFFFFFFF:F:FFF:FFFFFFFFFFFFFFFFFFFFFFFFFFFFFFFFFFFFFFFFFFFFFFFFFFFFFFFFFFFFF  
FFFFFFFFFFFFFFFFFFFFFFFFFFFFFFFFFFFFFFFFFFFFFFFFFFFFFFFFFFFFFFFFFFFFFFFFFFFFF:  
@A00155:342:HHGFNDSXY:1:1204:17996:8234 2:N:0:GAACCTAG+TCCGCATA  
AGTACATCTCCTTTGGA ACTAGGAGACCCCCTCCGGTCTTGTC AACCTCTGTTTCGGCAGAGGATACC  
GTGCTCCACAGCTGTAAGGCTGTGGGCCCGAGAGAAGTCGCTCTCTCTCGCCCTCCACATCCC  
+  
FFFFFFFFFFFFFF:F:FFFFFFFFFFFFFFFFFFFFFFFFFFFFFFFFFFFFFFFFFFFFFFFFFFFFFFFFFFFFF  
FFFFFFFFFFFFFFFFFFFFFFFFFFFFFFFFFFFFFFFFFFFFFFFFFFFFFFFFFFFFFFFFFFFFFFFFFFFFF:  
@A00155:342:HHGFNDSXY:1:1204:4309:11271 2:N:0:GAACCTAG+TCCGCATA  
GTTTCGGCAGAGGATACCGTGCTCCACAGCTGTAAGGCTGTGGGCCCGAGAGAAGTCGCTCTCTCTCG  
CCCTCCACATCCCTCTCGGCATTGAGATGACCATAGGCCAGAGGTGAGTCCTTAAGTGGACACAGCTG  
+  
FFFFFFFFFFFFFFFFFFFFFFFFFFFFFFFFFFFFFFFFFFFFFFFFFFFFFFFFFFFFFFFFFFFFFFFFFFFFF  
FFFFFFFFFFFFFFFFFFFFFFFFFFFFFFFFFFFFFFFFFFFFFFFFFFFFFFFFFFFFFFFFFFFFFFFFFFFFF:  
@A00155:342:HHGFNDSXY:1:1204:19361:12038 2:N:0:GAACCTAG+TCCGCATA  
GATCAGCTGTGT CCACTTAAGGACTCACCTCTGGCCTATGGTCATCTCAATGCCGAGAGGGATGTAGA  
GGGCGAGAGAGAGCGACTTCTCTCGGGCCACAGCCTTACAGCTGTGGAGCACGGTATCCTCTGCCGA  
+  
FFFFFFFFFFFFFFFFFFFFFFFFFFFFFFFFFFFFFFFFFFFFFFFFFFFFFFFFFFFFFFFFFFFFFFFFFFFFF:  
FFFFFFFFFFFFFFFFFFFFFFFFFFFFFFFFFFFFFFFFFFFFFFFFFFFFFFFFFFFFFFFFFFFFFFFFFFFFF:  
@A00155:342:HHGFNDSXY:1:1204:24831:34444 2:N:0:GAACCTAG+TCCGCATA  
GGACTCGTCAGGTAGCCTACTAGACTACGACTTACACGGTAGGTCGTGAACAAGCCCCGGAGTACATCT  
CCTTTGGA ACTAGGAGACCCCCTCCGGTCTTGTC AACCTCTGTTTCGGCAGAGGATACCGTGCTCCAC  
+  
FFFFFFFFFFFFFFFFFFFFFFFFFFFFFFFFFFFFFFFFFFFFFFFFFFFFFFFFFFFFFFFFFFFFFFFFFFFFF  
FFFFFFFFFFFFFFFF:F:FFF:FFFFFFFFFFFFFF:FFFFFFFFFFFFFFFFFFFFFFFFFFFFFFFFFFFFF  
@A00155:342:HHGFNDSXY:1:1205:21070:6167 2:N:0:GAACCTAG+TCCGCATA  
ACTTACACGGTAGGTCGTGAACAAGCCCCGGAGAACATCTCCTTTGGA ACTAGGAGACCCCCTCCGGTCT  
TGTC AACCTCTGTTTCGGCAGAGGATACCGTGCTCCACAGCTGTAAGGCTGTGGGCCCGAGAGAAGT  
+  
FFFFFFFFFFFFFFFFFFFFFFFFFFFFFFFFFFFFFFFFFFFFFFFFFFFFFFFFFFFFFFFFFFFFFFFFFFFFF  
FFFFFFFFFFFFFFFFFFFFFFFFFFFFFFFFFFFFFFFFFFFFFFFFFFFFFFFFFFFFFFFFFFFFFFFFFFFFF:  
@A00155:342:HHGFNDSXY:1:1205:12156:14810 2:N:0:GAACCTAG+TCCGCATA  
TCCTTGGAACG GACTCATCAGGGAGCCTACTAGACTCCGACCGTCATGGGGGTTCAA ACCCATGCCCC  
ACCACACCGCCTTAGATCAGCTGTGT CCACTTAAGGACTCACCTCTGGCCTATGGTCATCTCAATGCC  
+
```

[illegible]



```

FFFFFFFFFFFFFFFFFFFFFFFFFFFFFFFFFFFFFFFFFFFFFFFFFFFFFFFFFFFFFFFFFFFFF
FFFFFFFFFFFFFFF:FFFFFF:FFFFFF:FFFFFFFFFFFFFFFFFFFFFFFFFFFFFFFFFFFFF
@A00155:342:HHGFNDSXY:1:1206:26250:30796 2:N:0:GAACCTAG+TCCGCATA
ACAGCTGTAAGGCTGTGGGCCCGAGAGAAGTCGCTCTCTCTCGCCCTCCACATCCCTCTCGGCATTGA
GATGACCATAGGCCAGAGGTGAGTCCTTAAGTGGACACAGCTGATCTAAGGCGGTGTGGCGGG
+
FFFFFFFFFFFFFFFFFFFFFFFFFFFFFFFFFFFFFFFFFFFFFFFFFFFFFFFFFFFFFFFFFFFFF
FFFFFFFFFFFFFFFFFFFFFFFFFFFFFFFFFFFFFFFFFFFFFFFFFFFFFFFFFFFFFFFFFFFFF
@A00155:342:HHGFNDSXY:1:1207:21016:17253 2:N:0:GAACCTAG+TCCGCATA
GGACTCGTCAGGTAGCCTACTAGACTACGACTTACACGGTAGGTCTGTGAACAAGCCCGGAGTACATCT
CCTTTGGAAGTACAGAGACCCCTCCGGTCTTGTCACACCTCTGTTTCGGCAGAGGATACCGTGCTCCAC
+
FFFFFFFFFFFFFFF:FFFFFFFFFFFFFFFFFFFFFFFFFFFFFFFFFFFFFFFFFFFFFFFFFFFFF:FFF
FFFFFFFFFFFFFFFFFFFFFFFFFFFFFFFFFFFFFFFFFFFFFFFFFFFFFFFFFFFFFFFFFFFFF
@A00155:342:HHGFNDSXY:1:1207:10366:18944 2:N:0:GAACCTAG+TCCGCATA
ACGACTTACACGGTAGGTCTGTGAACAAGCCCGGAGTACATCTCCTTTGGAAGTACAGAGACCCCTCCGG
TCTTGTCACACCTCTGTTTCGGCAGAGGATACCGTGCTCCACAGCAGTAAGGCTGTGGGCCCGAGAGA
+
FFFFFFFFFFFFFFFFF,FFFFFFFFFFFFFFFFFFFFFFFFFFFFFFFFFFFFFFFFFFFFFFFFFFFFF
FFFFFFFFFFFFFFFFFFFFFFFFFFFFFFFFFFFFFFFFFFFFFFFFFFFFFFFFFFFFFFFFFFFFF:FFFFFFFFFFFFFFF
@A00155:342:HHGFNDSXY:1:1208:32072:2550 2:N:0:GAACCTAG+TCCGCATA
CCGGAGTACATCTCCTTTGGAAGTACAGAGACCCCTCCGGTCTTGTCACACCTCTGTTTCGGCAGAGGA
TACCGTGCTCCACAGCTGTAAGGCTGTGGGCCCGAGAGAAGTCGCTCTCTCTCGCCCTCCACATCCCT
+
FFFFFFFFFFFFFFFFFFFFFFFFFFFFFFFFFFFFFFFFFFFFFFFFFFFFFFFFFFFFFFFFFFFFF
,FFFFFFFFFFFFFFFFFFFFFFFFFFFFFFFFFFFFFFFFFFFFFFFFFFFFFFFFFFFFFFFFFFFFF:FFFFFFFFFFFFFFF
@A00155:342:HHGFNDSXY:1:1208:4806:9784 2:N:0:GAACCTAG+TCCGCATA
GAAACCGTCGTTACTCTTAGAGTTGTGTAAGTTTCGTCCTAAAAAGGACTCGTCAGGTAGCCTACTAG
ACTACGACTTACACGGTAGGTCTGTGAACAAGCCCGGAGTACATCTCCTTTGGAAGTACAGAGACCCCTC
+
FFFFFFFFFFFFF:FF,F:FFFFFFFFFFFF,FFFFFFFFFFFFFFFFFFFF::FFFF:FFFF:FFF:FFF,,FFF:
FFFFFFFFFFFFFFFFFFFFFFFFFFFFFFFFFFFF:FFFF,FFFF:FFFFFFFFFFFFFFFFFFFFFFFFFFFFF
@A00155:342:HHGFNDSXY:1:1208:19434:11162 2:N:0:GAACCTAG+TCCGCATA
TAGGAGACCCCTCCGGTCTTGTCACACCTCTGTTTCGGCAGAGGATACCGTGCTCCACAGCTGTAAGG
CTGTGGGCCCGAGAGAAGTCGCTCTCTCTCGCCCTCCACATCCCTCTCGGCATTGAGATG
+
FFFFFFFFFFFFFFFFFFFFFFFFFFFFFFFFFFFFFFFFFFFFFFFFFFFFFFFFFFFFFFFFFFFFF
FFFFFFFFF:FFFFFFFFFFFFFFFFFFFFFFFFFFFF:FFFFFFFFFFFFFFFFFFFFFFFFFFFFF
@A00155:342:HHGFNDSXY:1:1209:2293:5932 2:N:0:GAACCTAG+TCCGCATA
ACGGTAGGTCTGTGAACAAGCCCGGAGTACATCTCCTTTGGAAGTACAGAGACCCCTCCGGTCTTGTCCA
ACCTCTGTTTCGGCAGAGGATACCGTGCTCCACAGCTGTAAGGCTGTGGGCCCGAGAGAAGTCGCTCT
+
FFFFFFFFFFFFFFF::FFFFFFFFFFFFFFFFFFFFFFFFFFFF:FFFFFFFFFFFFFFFFFFFFFFFFFFFFF
FF:FFFFFFFFFFFFFFFFFFFFFFFFFFFFFFFFFFFF:FFFFFFFFFFFFFFFFFFFFFFFFFFFFFFFFFFFFF
@A00155:342:HHGFNDSXY:1:1209:4101:5963 2:N:0:GAACCTAG+TCCGCATA
AGTACATCTCCTTTGGAACAGAGACCCCTCCGGTCTTGTCACACCTCTGTTTCGGCAGAGGATACC
GTGCTCCACAGCTGTAAGGCTGTGGGCCCGAGAGAAGTCGCTCTCTCTCGCCCTCCACATCCC
+
FFFFFFFFFFFFFFFFFFFFF:FFFFFFFFFFFFFFFFFFFFFFFFFFFFF:FFFFFFFFFFFFFFFFFFFF:FFFFFFFFF
FFFFFFFFFFFFFFFFFFFFFFFFFFFFFFFFFFFFFFFFFFFFFFFFFFFFFFFFFFFFFFFFFFFFF
@A00155:342:HHGFNDSXY:1:1209:32723:16673 2:N:0:GAACCTAG+TCCGCATA
GAACAAGCCCGGAGTACATCTCCTTTGGAAGTACAGAGACCCCTCCGGTCTTGTCACACCTCTGTTTCG
GCAGAGGATACCGTGCTCCACAGCTGTAAGGCTGTGGGCCCGAGAGAAGTCGCTCTCTCTCGCCCTCC
+

```

[illegible]

```
FFFFFFFFFFFFFFFFFFFFFFFFFFFFFFFFFFFFFFFFFFFFFFFFFFFFFFFFFFFFF, FFFFFFFFFFFFFFFF  
@A00155:342:HHGFNDSXY:1:1212:7925:17534 2:N:0:GAACCTAG+TCCGCATA  
AGCCCGGAGTACATCTCCTTTGGAAGTAGGAGACCCTCCGGTCTTGTC AACCTCTGT TTCGGCAGA  
GGATACCGTGCTCCACAGCTGTAAGGCTGTGGGCCCGAGAGAAGTCGCTCTCTCTCGCCCTCCACATC  
+  
FFFFFFFFFFFFFFFFFFFFFFFFFFFFFFFFFFFFFFFFFFFFFFFFFFFFFFFFFFFFF: FFFFFF  
FFFFFFFFFFFFFFFFFFFFFFFFFFFFFFFFFFFFFFFFFFFFFFFFFFFFF: FFFFFFFFFFFFFFFF  
@A00155:342:HHGFNDSXY:1:1212:16242:23641 2:N:0:GAACCTAG+TCCGCATA  
CAGGTAGCCTACTAGACTACGACTTACACGGTAGGTCGTGAACAAGCCCGGAGTACATCTCCTTTGGA  
ACTAGGAGACCCTCCGGTCTTGTC AACCTCTGT TTCGGCAGAGGATACCGTGCTCCACAGCTGTAA  
+  
FFFFFFFFFFFFFFFFFFFFFFFFFFFFFFFFFFFFFFFFFFFFFFFFFFFFFFFFFFFFF  
FFFFFFFFFFFFFFFFFFFFFFFFFFFFFFFFFFFFFFFFFFFFFFFFFFFFF: FFFFFFFFFFFFFFFF  
@A00155:342:HHGFNDSXY:1:1212:8187:28354 2:N:0:GAACCTAG+TCCGCATA  
TTTCGTCCTAAAAAGGACTCGTCAGGTAGCCTACTAGACTACGACTTACACGGTAGGTCGTGAACAAG  
CCCGGAGTACATCTCCTTTGGAACCAGGAGACCCTCCGGTCTTGTC AACCTCTGT TTCGGCAGAGG  
+  
F: FFFFFFFFFF: FFFFFFFFFF: FFFFFFFF, FFFFFFFFFFFFFFFFFFFFFF:, FFFFF: FFFF  
FFFFFFFFFFFFFFFFF: F, FFFF, FFFFFFFFFFFFFFFFFFF, , FFFFFFFFFFFFFFFF: FFFFFFFF  
@A00155:342:HHGFNDSXY:1:1212:5330:31454 2:N:0:GAACCTAG+TCCGCATA  
AAACTTACACA ACTCGAAGAGTAACGACGGTTTCGT CCTTGGAACGGACTCATCAGGGAGCCTACTAG  
ACTCCGACCGTCATGGGGGTTCAAACCCATGCCCCGCCACACCGCCTTAGATCAGCTGTGTCTACTTA  
+  
FFFFFFFFFFFFFFFFFFFFFFFFFFFFFFFFFFFFFFFFFFFFFFFFFFFFFFFFFFFFF  
FFFFFFFFFFFFFFFFFFFFFFFFFFFFFFFFFFFFFFFFFFFFFFFFFFFFF: FFFFFFFFFFFFFFFF: FFFFFFFFFFFF  
@A00155:342:HHGFNDSXY:1:1212:24053:35446 2:N:0:GAACCTAG+TCCGCATA  
GTGAACAAGCCCGGAGTACATCTCCTTTGGAAGTAGGAGACCCTCCGGTCTTGTC AACCTCTGT TT  
CGGCAGAGGATACCGTGCTCCACAGCTGTAAGGCTGTGGGCCCGAGAGAAGTCGCTCTCTCTCGCCCT  
+  
FFFFFFFFFFFFFFFFFFFFFFFFFFFFFFFFFFFFFFFFFFFFFFFFFFFFF, FFFFFFFFFFFFFFFF  
FFFFFFFFFFFFFFFFFFFFFFFFFFFFFFFFFFFFFFFFFFFFFFFFFFFFF: FFFFFFFFFFFFFFFF  
@A00155:342:HHGFNDSXY:1:1213:13964:1094 2:N:0:GAACCTAG+TCCGCATA  
CACGGTAGGTCGTGAACAAGCCCGGAGTACATCTCCTTTGGAACCAGGAGACCCTCCGGTCTTGTC  
AACCTCTGT TTCGGCAGAGGATACCGTGCTCCACAGCTGTAAGGCTGTGGGCCCGAGAGAAGTCGCTC  
+  
FFFFFFFFFFFFFFFFFFFFF: FFFFFFFFFFFFFFFFFFFFFFFFFFFFFFFFFFFFFF: FFFFFFFFFF  
FFFFFFFFFFFFFFFFFFFFFFFFFFFFFFFFFFFFFFFFFFFFF: FFFFFFFF: FFFFFFFFFFFFFFFF: FFFFF  
@A00155:342:HHGFNDSXY:1:1213:32805:3474 2:N:0:GAACCTAG+TCCGCATA  
TGTGTAAGTTTTCGTCCTAAAAGGACTCGTCAGGTAGCCTACTAGACTACGACTTACACGGTAGGTCG  
TGAACAAGCCCGGAGTACATCTCCTTTGGAAGTAGGAGACCCTCCGGTCTTGTC AACCTCTGT TTC  
+  
FFFF, FFFFFF: FFFFF: FFFFFFFFFFFFFFFFFFFFFFFFFFFFFF: FFFFFFFFFFFFFFFFFFFFFF  
FFFFFFFFFFFFFFFFFFFFF: FFFFFFFFFFFFFFFFFFFFFFFFFFFFFF, FFFFFFFFFFFFFF  
@A00155:342:HHGFNDSXY:1:1213:30083:11631 2:N:0:GAACCTAG+TCCGCATA  
GTGAACAAGCCCGGAGTACATCTCCTTTGGAACCAGGAGACCCTCCGGTCTTGTC AACCTCTGT TT  
CGGCAGAGGATACCGTGCTCCACAGCTGTAAGGCTGTGGGCCCGAGAGAAGTCGCTCTCTCTCGC  
+  
FFFFFFFFFFFFFFFFFFFFF: FFFFFFFFFFFFFFFFFFFFFFFFFFFFFF, FFFF  
FFFFFFFFFFFFFFFFFFFFFFFFFFFFFFFFFFFFF: FFFFFFFFFFFFFFFFFFFFFF  
@A00155:342:HHGFNDSXY:1:1213:10285:20306 2:N:0:GAACCTAG+TCCGCATA  
GGACTCGTCAGGTAGCCTACTAGACTACGACTTACACGGTAGGTCGTGAACAAGCCCGGAGTACATCT  
CCTTTGGAAGTAGGAGACCCTCCGGTCTTGTC AACCTCTGT TTCGGCAGAGGATACCGTGCTCCAC  
+
```

```

FFFFFFFFFFFFFFFFFFFFFFFFFFFFFFFFFFFFFFFFFFFFFFFFFFFFFFFFFFFFFFFFFFFFFFFFF:FFFFFFFFFFFFFFFF
FFFFFFFFFFFFFFFFFFFFFFFFFFFFFFFFFFFFFFFFFFFFFFFFFFFFFFFFFFFFFFFFFFFFFFFFF:FFFFFFFFFFFFFFF
@A00155:342:HHGFNDSXY:1:1213:19307:36808 2:N:0:GAACCTAG+TCCGCATA
ACTTACACGGTAGGTCGTGAACAAGCCCGGAGTACATCTCCTTTGGAAGTACAGAGACCCCTCCGGTCT
TGTC AACCTCTGTTTCGGCAGAGGATACCGTGCTCCACAGCTGTAAGGCTGTGGGCCCGAGAGAAGT
+
FFFFFFFFFFFFFFFFFFFFFFFFFFFFFFFFFFFFFFFFFFFFFFFFFFFFFFFFFFFFFFFFFFFFFFFFF
FFFFFFFFFFFF:FFFFFFFFFFFFFFFFFFFFFFFFFFFFFFFFFFFFFFFFFFFFFFFFFFFFFFFFFFFFF
@A00155:342:HHGFNDSXY:1:1214:23936:11725 2:N:0:GAACCTAG+TCCGCATA
AAGGACTCGTCAGGTAGCCTACTAGACTACGACTTACACGGTAGGTCGTGAACAAGCCCGGAGTACAT
CTCCTTTGGAAGTACAGAGACCCCTCCGGTCTTGTCCAACCTCTGTTTCGGCAGAGGATACCGTGCTCC
+
FFFFFFFFFFFFFFFFFFFFFFFFFFFFFFFFFFFFFFFFFFFFFFFFFFFFFFFFFFFFFFFFFFFFFFFFF
FFFFFFFFFFFFFFFFFFFFFFFFFFFFFFFFFFFFFFFFFFFFFFFFFFFFFFFFFFFFFFFFFFFFFFFFF
@A00155:342:HHGFNDSXY:1:1214:25066:23766 2:N:0:GAACCTAG+TCCGCATA
AGGTAGCCTACTAGACTACGACTTACACGGTAGGTCGTGAACAAGCCCGGAGTACATCTCCTTTGGAA
CTAGGAGACCCCTCCGGTCTTGTCCAACCTCTGTTTCGGCAGAGGATACCGTGCTCCACAGCTGTAAG
+
:FFF:FFFFFFFFFFFFFFFFFFFFFFFFFFFFFFFFFFFFFFFFFFFFFFFFFFFFFFFFFFFFFFFFF
FF,FFFFFFFFFFFFFFFFFFFFFFFFFFFFFFFFFFFFFFFFFFFFFFFFFFFFFFFFFFFFFFFFF
@A00155:342:HHGFNDSXY:1:1214:28519:36229 2:N:0:GAACCTAG+TCCGCATA
GGACTCGTCAGGTAGCCTACTAGACTACGACTTACACGGTAGGTCGTGAACAAGCCCGGAGTACATCT
CCTTTGGAAGTACAGAGACCCCTCCGGTCTTGTCCAACCTCTGTTTCGGCAGAGGATACCGTGCTCCAC
+
FFFFFFFFFFFFFFFFFFFFFFFFFFFFFFFFFFFFFFFFFFFFFFFFFFFFFFFFFFFFFFFFFFFFFFFFF
FFF:FFFFFFFFF,FFFFFFFFFFFFFFFFFFFFFFFFFFFFFFFFFFFFFFFFFFFFFFFFFFFFFFFFF
@A00155:342:HHGFNDSXY:1:1215:14543:11459 2:N:0:GAACCTAG+TCCGCATA
AGTACATCTCCTTTGGAAGTACAGAGACCCCTCCGGTCTTGTCCAACCTCTGTTTCGGCAGAGGATACC
GTGCTCCACAGCTGTAAGGCTGTGGGCCCGAGAGAAGTCGCTCTCTCTCGCCCTCTACATCCCTCTCG
+
FFFFFFFFFFFFFFFFFFFFFFFFFFFFFFFFFFFFFFFFFFFFFFFFFFFFFFFFFFFFFFFFFFFFFFFFF
FFFFFFFFFFFFFFFFFFFFFFFFFFFFFFFFFFFFFFFFFFFFFFFFFFFFFFFFFFFFFFFFFFFFFFFFF
@A00155:342:HHGFNDSXY:1:1215:14000:30279 2:N:0:GAACCTAG+TCCGCATA
ACTTACACGGTAGGTCGTGAACAAGCCCGGAGTACATCTCCTTTGGAAGTACAGAGACCCCTCCGGTCT
TGTC AACCTCTGTTTCGGCAGAGGATACCGTGCTCCACAGCTGTAAGGCTGTGGGCCCGAGAGAAGT
+
FFFFFFFFFFFFFFFFFFFFFFFFFFFFFFFFFFFFFFFFFFFFFFFFFFFFFFFFFFFFFFFFFFFFFFFFF
FFFFFFFFFFFFFFFFFFFFFFFFFFFFFFFFFFFFFFFFFFFFFFFFFFFFFFFFFFFFFFFFFFFFFFFFF,
FFFFFFFFFFFFFFFFFFFFFFFFFFFFFFFFFFFFFFFFFFFFFFFFFFFFFFFFFFFFFFFFFFFFFFFFF,FF
@A00155:342:HHGFNDSXY:1:1215:24505:30874 2:N:0:GAACCTAG+TCCGCATA
GACCCCTCCGGTCTTGTCCAACCTCTGTTTCGGCAGAGGATACCGTGCTCCACAGCTGTAAGGCTGTG
GGCCCCGAGAGAAGTCGCTCTCTCTCGCCCTCCACATCCCTCTCGGCATTGAGATGAC
+
FFFFFFFFFFFFFFFFFFFFFFFFFFFFFFFFFFFFFFFFFFFFFFFFFFFFFFFFFFFFFFFFFFFFFFFFF
FFFFFFFFFFFFFFFFFFFFFFFFFFFFFFFFFFFFFFFFFFFFFFFFFFFFFFFFFFFFFFFFFFFFFFFFF:
@A00155:342:HHGFNDSXY:1:1216:29957:3427 2:N:0:GAACCTAG+TCCGCATA
GAAACCGTCGTTACTCTTTGAGTTGTGTAAGTTTCGTCCTAAAAAGGACTCGTCAGGTAGCCTACTAG
ACTACGACTTACACGGTAGGTCGTGAACAAGCCCGGAGTACATCTCCTTTGGAAGTACAGAGACCCCTC
+
FFFFFFFFFFFFFFFFFFFFFFFFFFFF:,FFFFFFFFFFFFFFFFFFFFFFFFFFFFFFFFF,FFFFFFFFFFFF,FFFF:
FFFFFFFFFFFF:FFFFFFFFFFFFFFFFFFFFFFFFFFFFFFFFFFFFFFFFFFFFFFFFFFFF:FF:
@A00155:342:HHGFNDSXY:1:1216:15338:6918 2:N:0:GAACCTAG+TCCGCATA
TACGACTTACACGGTAGGTCGTGAACAAGCCCGGAGTACATCTCCTTTGGAAGTACAGAGACCCCTCCG
GTCTTGTCCAACCTCTGTTTCGGCAGAGGATACCGTGCTCCACAGCTGTAAGGCTGTGGGCCCG
+

```

FFFFFFFFFFFFFFFFFFFFFFFFFFFFFFFFFFFFFFFFFFFFFFFFFFFFFFFFFFFFFFFFFFFFFFFF  
FFFFFFFFFFFFFFFFFFFFFFFFFFFFFFFFFFFFFFFFFFFFFFFFFFFFFFFFFFFFFFFFFFFFFFFF  
@A00155:342:HHGFNDSXY:1:1216:12409:12837 2:N:0:GAACCTAG+TCCGCATA  
AAACTTACACAACCTCGAAGAGTAACGACGGTTTCGTCCTTGGAACGGACTCATCAGGGAGCCTACTAG  
ACTCCGACCGTCATGGGGGTTCAAACCCATGCCCCGCCACACCGCCTTAGATCAGCTGTGTCCACTTA  
+  
FFFFFFFFFFFFFFFFFFFFFFFFFFFFFFFFFFFFFFFFFFFFFFFFFFFFFFFFFFFFFFFFFFFFFFFF:FFFFFFFFFFFFFFFFFFFFFFFF:FFF:  
FFFFFFFFFFFFFFFFFFFFFFFFFFFFFFFFFFFFFFFFFFFFFFFFFFFFFFFFFFFFFFFFFFFFFFFF,FF  
@A00155:342:HHGFNDSXY:1:1216:8061:30608 2:N:0:GAACCTAG+TCCGCATA  
TCCTAAAAAGGACTCGTCAGGTAGCCTACTAGACTACGACTTACACGGTAGGTCGTGAACAAGCCCGG  
AGTACATCTCCTTTGGAAGTAGGAGACCCCTCCGGTCTTGCCAACCTCTGTTTCGGCAGAGGATACC  
+  
FFFFFFFFFFFFFFFFFFFFFFFFFFFFFFFFFFFFFFFFFFFFFFFFFFFFFFFFFFFFFFFFFFFFFFFF:F  
FFFFFF:FFFFFFFFFFFFFFFF:FF:FFFFFF:FFFFFFFFFFFFFFFFFFFFFFFFFFFFFFFF:FFFF:FF  
@A00155:342:HHGFNDSXY:1:1217:31647:13870 2:N:0:GAACCTAG+TCCGCATA  
CTCTTCGAGTTGTGTAAGTTTCGTCCTAAAAAGGACTCGTCAGGTAGCCTACTAGACTACGACTTACA  
CGGTAGGTCGTGAACAAGCCCGGAGTACATCTCCTTTGGAAGTAGGAGACCCCTCCGGTCTTGTCCTCA  
+  
FFF:FFFFFFFFFFFFFFFFFFFFFFFFFFFFFFFFFFFFFFFFFFFFFFFFFFFFFFFFFFFFFFFFFFFFF  
FFFFFFFFFFFFFFFFFFFFFFFFFFFFFFFFFFFFFFFFFFFFFFFFFFFFFFFFFFFFFFFFFFFFFFFF:FFF:FFFFFF:,FFFFFFFFFFFFFFF  
@A00155:342:HHGFNDSXY:1:1217:7835:15781 2:N:0:GAACCTAG+TCCGCATA  
GGAGACCCCTCCGGTCTTGTCCTAACCTCTGTTTCGGCAGAGGATACCGTGCTCCACAGCTGTAAGGCT  
GTGGGCCCGAGAGAAGTCGCTCTCTCTCGCCCTCCACATCCCTCTCGGCATAGAGATGACCATAGGCC  
+  
FFFFFFFFFFFFFFFFFFFFFFFFFFFFFFFFFFFFFFFFFFFFFFFFFFFFFFFFFFFFFFFFFFFFFFFF:FFFFFFFFFFFFFFFFFFFFFFFFFFFFFFFF  
FFFFFFFFFFFFFFFF:FFFFFFFFFFFFFFFFFFFFFFFFFFFFFFFFFFFFFFFFFFFFFFFF:FFFFFFFFFFFFFFFF  
@A00155:342:HHGFNDSXY:1:1217:24496:19742 2:N:0:GAACCTAG+TCCGCATA  
GTTGTGTAAGTTTCGTCCTAAAAAGGACTCGTCAGGTAGCCTACTAGACTACGACTTACACGGTAGGT  
CGTGAACAAGCCCGGAGTACATCTCCTTTGGAAGTAGGAGACCCCTCCGGTCTTGTCCTAACCTCTGTT  
+  
FFFFFFFFFFFFFFF:FFFFFFFFFFFFFFFFFFFFFFFFFFFFFFFFFFFFFFFFFFFFFFFFFFFFFFFFFFFF  
FF:FFFF:FFFFFFFFFFFFFFFFFFFFFFFFFFFFFFFF:FFFFFFFFFFFFFFFFFFFFFFFF:FFFFFFFFFF  
@A00155:342:HHGFNDSXY:1:1217:1651:30436 2:N:0:GAACCTAG+TCCGCATA  
TCCAAGGACGAAACCGTCGTTACTCTTTGAGTTGTGTAAGTTTCGTCCTAAAAAGGACTCGTCAGGTA  
GCCTACTAGACTACGACTTACACGGTAGGTCGTGAACAAGCCCGGAGTACATCTCCTTTGGAAGTAGG  
+  
FFFFFFFFFFFFFFFFFFFFFFFFFFFFFFFF:FFFFFFF:FFFFFFFFFFFFFFFFFFFFFFFF:FFF,FFFFFFFFF:FFFF  
FFFFFFFFFFFFFFFFFFFFFFFFFFFFFFFFFFFFFFFFFFFFFFFFFFFFFFFFFFFFFFFFFFFFFFFFFFFF  
@A00155:342:HHGFNDSXY:1:1217:3061:31908 2:N:0:GAACCTAG+TCCGCATA  
GGAGACCCCTCCGGTCTTGTCCTAACCTCTGTTTCGGCAGAGGATACCGTGCTCCACAGCTGTAAGGCT  
GTGGGCCCGAGAGAAGTCGCTCTCTCTCGCCCTCTACATCCCTCTCGGCATTGAGATGACCATAGGCC  
+  
FFFFFFFFFFFFFFFFFFFFF:FFFFFFFFFFFFFFFFFFFFFFFFFFFFFFFFFFFFFFFFFFFFFFFFFFFFF:  
FFFFFFFFFFFFFFFFFFFFFFFFFFFFFFFFFFFFFFFFFFFFFFFFFFFFFFFFFFFFFFFF:FFFFFFFFFFFFFFFF  
@A00155:342:HHGFNDSXY:1:1218:18376:24674 2:N:0:GAACCTAG+TCCGCATA  
AGGACGAACTTACACAACCTCGAAGAGTAACGACGGTTTCGTCCTTGGAACGGACTCATCAGGGAGCC  
TACTAGACTCCGACCGTCATGGGGGTTCAAACCCATGCCCCGCTACACCGCCTTAGATCAGCTGTGTC  
+  
FFFFFFFFFFFFFFFFFFFFFFFFFFFFFFFF:FFFFFFFFFFFFFFFFFFFFFFFFFFFFFFFFFFFFFFFFFFFF  
FFFFFFFFFFFFFFFFFFFFFFFFFFFFFFFFFFFFFFFFFFFFFFFFFFFFFFFFFFFFFFFFFFFFFFFFFFFF  
@A00155:342:HHGFNDSXY:1:1218:28637:27602 2:N:0:GAACCTAG+TCCGCATA  
CTGGCCTATGGTCATCTCAATGCCGAGAGGGATGTGAAGGGCGAGAGAGAGCGACTTCTCTCGGGCCC  
ACAGCCTTACAGCTGTGGAGCACGGTATCCTCTGCCGAAACAGAGGTTGGACAAGACCGGAG  
+

FFFFFFFFFFFFFFFFFFFFFFFFFFFFFFFFFFFFFFFFFFFFFFFFFFFFFFFFFFFFFFFFFFFFFFFFFFFFFFFF  
 FFFFFFFF:FFFFFFFFFFFFFFFFFFFFFFFFFFFFFFFFFFFFFFFFFFFFFFFFFFFFFFFFFFFFFFFFFFFF  
 @A00155:342:HHGFNDSXY:1:1218:28094:28823 2:N:0:GAACCTAG+TCCGCATA  
 CTGGCCTATGGTCATCTCAATGCCGAGAGGGATGTGAAGGGCGAGAGAGAGCGACTTCTCTCGGGCCC  
 ACAGCCTTACAGCTGTGGAGCACGGTATCCTCTGCCGAAACAGAGGTTGGACAAGACCGGAG  
 +  
 FFFFFFFFFFFFFFFFFFFFFFFFFFFFFFFFFFFFFFFFFFFFFFFFFFFFFFFFFFFFFFFFFFFFFFFFFFFFFF  
 FFFFFF,FFFFFFFFFFFFFFFFFFFFFFFFFFFFFFFFFFFFFFFFFFFFFFFFFFFFFFFFFFFFFFFFFFFF  
 @A00155:342:HHGFNDSXY:1:1218:23312:29371 2:N:0:GAACCTAG+TCCGCATA  
 ACATCTCCTTTGGAAGTAGGAGACCCCTCCGGTCTTGTCACCCTCTGTTTCGGCAGAGGATACCGTG  
 CTCCACAGCTGTAAGGCTGTGGGCCCCGAGAGAAGTCGCTCTCTCTCGCCCTCCACATCCCTCTCGGCA  
 +  
 FFFFFFFFFFFFFF:FFFFFFFFFFFFFFFFFFFFFFFFFFFFFFFFFFFFFFFFFFFFFFFFFFFFFFFFFFFFF  
 FFFFFFFFFF:FF:FFFFFFFFFFFFFFFFFFFFFFFFFFFFFFFFFFFFFFFFFFFFFFFFFFFFFFFFFFFFF  
 @A00155:342:HHGFNDSXY:1:1218:25229:36855 2:N:0:GAACCTAG+TCCGCATA  
 CGTCCTAAAAAGGACTCGTCAGGTAGCCTACTAGACTACGACTTACACGGTAGGTCTGTAACAAGCCC  
 GGAGTACATCTCCTTTGGAAGTAGGAGACCCCTCCGGTCTTGTC AACCTCTGTTTCGGCAGAGGATA  
 +  
 FFFFFFFFFFFFFFFFFFFFFFFFFFFFFFFFFFFFFFFFFFFFFFFFFFFFFFFFFFFFFFFFFFFFFFFFFFFFFF  
 FFFFFFFFFFFFFFFFFFFFFFFFFFFFFFFFFFFFFFFFFFFFFFFFFFFFFFFFFFFFFFFFFFFFFFFFFFFFFF  
 @A00155:342:HHGFNDSXY:1:1219:14850:16313 2:N:0:GAACCTAG+TCCGCATA  
 GTGAACAAGCCCGGAGTACATCTCCTTTGGAACCAGGAGACCCCTCCGGTCTTGTC AACCTCTGTTT  
 CGGCAGAGGATACCGTGCTCCACAGCTGTAAGGCTGTGGGCCCGAGAGAAGTCGCTCTCTCTCGCCCT  
 +  
 FFFFFFFFFFFFFFFFFFFFFFFFFFFFFFFFFFFFFFFFFFFFFFFFFFFFFFFFFFFFFFFFFFFFFFFFFFFFFF  
 FFFFFFFFFFFFFF:FFFFFFFFFFFFF:F:FFFFFFFFFFFFFFFFFFFFFFFFFFFFFFFFFFFFFFFFFFFFF  
 @A00155:342:HHGFNDSXY:1:1219:15917:16313 2:N:0:GAACCTAG+TCCGCATA  
 GTGAACAAGCCCGGAGTACATCTCCTTTGGAACCAGGAGACCCCTCCGGTCTTGTC AACCTCTGTTT  
 CGGCAGAGGATACCGTGCTCCACAGCTGTAAGGCTGTGGGCCCGAGAGAAGTCGCTCTCTCTCGCCCT  
 +  
 FFFFFFFFFFFFFFFFFFFFFFFFFFFFFFFFFFFFFFFFFFFFFFFFFFFFFFFFFFFFFFFFFFFFFFFFFFFFFF  
 FFFFFFFFFFFFFFFFFFFFFFFFFFFFFFFFFFFFFFFFFFFFFFFFFFFFFFFFFFFFFFFFFFFFFFFFFFFFFF  
 @A00155:342:HHGFNDSXY:1:1220:26811:3302 2:N:0:GAACCTAG+TCCGCATA  
 GACCCCTCCGGTCTTGTC AACCTCTGTTTCGGCAGAGGATACCGTGCTCCACAGCTGTAAGGCTGTG  
 GGCCCGAGAGAAGTCGCTCTCTCTCGCCCTCTACATCCCTCTCGGCATTGAGATGACCATAGGC  
 +  
 FFFFFFFFFFFFFF,FFFFFFFFFFFFFFFFFFFFFFFFFFFFFFFFFFFFFFFFFFFFFFFFFFFFFFFFFFFFF  
 FFFFFFFFFFFFFFFFFFFFFFFFFFFFFFFFFFFFFFFFFFFFFFFFFFFFFFFFFFFFFFFFFFFFFFFFFFFFFF  
 @A00155:342:HHGFNDSXY:1:1220:13666:16861 2:N:0:GAACCTAG+TCCGCATA  
 CACGGTAGGTCGTGAACAAGCCCGGAGTACATCTCCTTTGGAAGTAGGAGACCCCTCCGGTCTTGTC  
 AACCTCTGTTTCGGCAGAGGATACCGTGCTCCACAGCTGTAAGGCTGTGGGCCCGAGAGAAGTCGCTC  
 +  
 FFFFFFFFFFFFFFFFFFFFFF:FFFFFFFFFFFFFFFFFFFFFFFFFFFFFFFFFFFFFFFFFFFFFFFFFFFFF  
 FFFFFFFFFFFFFFFFFFFFFFFFFFFFFFFFFFFFFFFFFFFFFFFFFFFFFFFFFFFFFFFFFFFFFFFFFFFFFF  
 @A00155:342:HHGFNDSXY:1:1220:26901:21684 2:N:0:GAACCTAG+TCCGCATA  
 GGACTCGTCAGGTAGCCTACTAGACTACGACTTACACGGTAGGTCTGTAACAAGCCCGGAGTACATCT  
 CCTTTGGAAGTAGGAGACCCCTCCGGTCTTGTC AACCTCTGTTTCGGCAGAGGATACCGTGCTCCAC  
 +  
 ,FF,F,FFFFFFFFF:FFFFFFFFFFFFF,FFFFFFFFF:FFFFF:FF:FFFFF,FFFFFFFFF,F,:F  
 F,,FFFFFFFFFFFFFFFFF:FFFFFFFFF:FFFFFFFFFFF:FFF:FFFFFFFF:FFF,FFF,FF:F:FFFFF  
 @A00155:342:HHGFNDSXY:1:1220:8558:27993 2:N:0:GAACCTAG+TCCGCATA  
 AAAAGGACTCGTCAGGTAGCCTACTAGACTACGACTTACACGGTAGGTCTGTAACAAGCCCGGAGTAC  
 ATCTCCTTTGGAAGTAGGAGACCCCTCCGGTCTTGTC AACCTCTGTTTCGGCAGAGGATACCGTGCT

FFFFFFFFFFFFFFFFFFFFFFFF:FFF:FF:FFFFFFFFFFFFFFFFFFFFFFFFFFFFFFFF:FFFFFFFFF  
FFFFFFFFFFFFFFFFFFFFFFFFFFFFFFFFFFFFFFFFFFFFFFFFFFFFFFFFFFFFFFFFFFFFFFFF  
@A00155:342:HHGFNDSXY:1:1220:5828:36730 2:N:0:GAACCTAG+TCCGCATA  
ACTCTTTGAGTTGTGTAAGTTTCGTCTCTAAAAAGGACTCGTCAGGTAGCCTACTAGACTACGACTTAC  
ACGGTAGGTCGTGAACAAGCCCGGAGTACATCTCCTTTGGAAGTACTAGGAGACCCCTCCGGTCTTGTCCA  
+  
FFFF:FFFFFFFFFFFFFFFFFFFFFFFFFFFFFFFFFFFFFFFFFFFFFFFFFFFFFFFFFFFFFFFF  
FFFFFFFFFFFFFFFFFFFFFFFFFFFFFFFF:FFFFFFFFFFFF:FFFFFFFFFFFF:FFFFFFFFFFFF,FFFFF  
@A00155:342:HHGFNDSXY:1:1221:6207:19476 2:N:0:GAACCTAG+TCCGCATA  
AACGGACTCATCAGGGAGCCTACTAGACTCCGACCGTCATGGGGGTTCAAACCATGCCCGCCACAC  
CGCCTTAGATCAGCTGTGTCCACTTAAGGACTCACCTCTGGCCTATGGTCATCTCAATGCCGAGAGGG  
+  
FFFFF:F:FFFFFFFFFFFF:FFFFFFFFFFFFFFFFFFFF,FFFFFFFFFFFFFFFFFFFFFFFFFFFFF  
FFFFFFFFFFFFFFFFFFFFFFFFFFFFF:FFFFFFFFFFFFFFFFFFFF:FFFFFFFFFFFFFFFFFFFF:FFFFF  
@A00155:342:HHGFNDSXY:1:1221:20726:27618 2:N:0:GAACCTAG+TCCGCATA  
ACACGGTAGGTCGTGAACAAGCCCGGAGTACATCTCCTTTGGAAGTACTAGGAGACCCCTCCGGTCTTGT  
CAACCTCTGTTTCGGCAGAGGATACCGTGCTCCACAGCTGTAAGGCTGTGGGCCCGAGAGAAGTCGCT  
+  
FFFFFFFFFFFFFFFFFFFFFFFFFFFFFFFFFFFFFFFF:FFFFFFFFFFFFFFFFFFFFFFFFFFFFF,FFF  
FFFFFFFFFFFFFFFFFFFFFFFFFFFFFFFFFFFFFFFFFFFFFFFFFFFFFFFFFFFFFFFFFFFFFFFF:FFFFF  
@A00155:342:HHGFNDSXY:1:1222:6696:3662 2:N:0:GAACCTAG+TCCGCATA  
GGAGTACATCTCCTTTGGAACAAGGAGACCCCTCCGGTCTTGTCCAACCTCTGTTTCGGCAGAGGATA  
CCGTGCTCCACAGCTGTAAGGCTGTGGGCCCGAGAGAAGTCGCTCTCTCTCGCCCTCCACATCCC  
+  
FFFFFFFFFFFFFFFFFFFFFFFFFFFFFFFFFFFFFFFFFFFFFFFFFFFFFFFFFFFFFFFFFFFFFFFF  
FFFFFFFFFFFFFFFFFFFFFFFFFFFFFFFFFFFFFFFFFFFFFFFFFFFFFFFFFFFFFFFFFFFFFFFF  
@A00155:342:HHGFNDSXY:1:1222:32136:17660 2:N:0:GAACCTAG+TCCGCATA  
TAGACTACGACTTACACGGTAGGTCGTGAACAAGCCCGGAGTACATCTCCTTTGGAAGTACTAGGAGACCC  
CTCCGGTCTTGTCCAACCTCTGTTTCGGCAGAGGATACCGTGCTCCACAGCTGCAAGGCTGTGGGCC  
+  
FFFFFFFFFFFFFFFFFFFFFFFFFFFFF:FFFFFFFFFFFFFFFFFFFFFFFFFFFFFFFFFFFFFFFFFFFF  
FFFFF:FFFFFFFFFFFFFFFFFFFFFFFFFFFF,FFFFF:FFFFFFFFFFFFFFFFFFFFFFFFFFFF:FFFFF  
@A00155:342:HHGFNDSXY:1:1222:10095:19946 2:N:0:GAACCTAG+TCCGCATA  
ACCTCTGTTTCGGCAGAGGATACCGTGCTCCACAGCTGTAAGGCTGTGGGCCCAAGAGAAGTCGCTCT  
CTCTCGCCCTCCACATCCCTCTCGGCATTGAGATGACCATAGGCCAGAGGTGAGTCCTTAAGTGGACA  
+  
FFFFFFFFFFFFFFFFFFFFFFFFFFFFFFFFFFFFFFFF:FFFFFFFFFFFFFFFFFFFFFFFFFFFFFFFFFFFF  
FFFFFFFFFFFFFFFFFFFFFFFFFFFFFFFFFFFFFFFFFFFFFFFFFFFFFFFFFFFFFFFFFFFFFFFFFFFF  
@A00155:342:HHGFNDSXY:1:1222:9236:20776 2:N:0:GAACCTAG+TCCGCATA  
ACCTCTGTTTCGGCAGAGGATACCGTGCTCCACAGCTGTAAGGCTGTGGGCCCAAGAGAAGTCGCTCT  
CTCTCGCCCTCCACATCCCTCTCGGCATTGAGATGACCATAGGCCAGAGGTGAGTCCTTAAGTGGACA  
+  
FFFFFFFFFFFFFFFFFFFFFFFFFFFFFFFFFFFFFFFFFFFFFFFFFFFFFFFFFFFFFFFFFFFFFFFFFFFF  
FFFFFFFFFFFFFFFFFFFFFFFFFFFFFFFFFFFFFFFFFFFFFFFFFFFFFFFFFFFFFFFFFFFFFFFFFFFF  
@A00155:342:HHGFNDSXY:1:1222:14208:22122 2:N:0:GAACCTAG+TCCGCATA  
TAAGTTTCGTCTCTAAAAAGGACTCGTCAGGTAGCCTACTAGACTACGACTTACACGGTAGGTCGTGAA  
CAAGCCCGGAGTACATCTCCTTTGGAACGAGGAGACCCCTCCGGTCTTGTCCAACCTCTGTTTCGGCA  
+  
FFFFFFFFFFFFFFFFFFFFF:FFFFFFFFFFFFF,FFFFFFFFFFFFFFFFFFFFFFFFFFFFF:FFFFF  
FFFFFFFFFFFFFFFFFFFFFFFFFFFFFFFFFFFFFFFFFFFFFFFFFFFFFFFFFFFFFFFFFFFFFFFFFFFF  
@A00155:342:HHGFNDSXY:1:1223:14172:30076 2:N:0:GAACCTAG+TCCGCATA  
TACGACTTACACGGTAGGTCGTGAACAAGCCCGGAGTACATCTCCTTTGGAAGTACTAGGAGACCCCTCCG  
GTCTTGTCCAACCTCTGTTTCGGCAGAGGATACCGTGCTCCACAGCTGTAAGGCTGTGGGCCCG  
+

FFFFFFFFFFFFFFFFFFFFFFFFFFFFFFFFFFFFFFFFFFFFFFFFFFFFFFFFFFFFFFFFFFFFFFFF  
FFFFFFFFFFFFFFFFFFFFFFFFFFFFFFFFFFFFFFFFFFFFFFFFFFFFFFFFFFFFFFFFFFFFFFFF  
@A00155:342:HHGFNDSXY:1:1223:17824:31704 2:N:0:GAACCTAG+TCCGCATA  
TTGTCCAACCTCTGTTTCGGCAGAGGATACCGTGCTCCACAGCTGTAAGGCTGTGGGCCCGAGAGAAG  
TCGCTCTCTCTCGCCCTCTACATCCCTCTCGGCATTGAGATGACCATAGGCCAGAGGTGAGTCCTTAA  
+  
:FFFFFFFFFFFFFFFFFFFFFFFFFFFFFFFFFFFFFFFFFFFFFFFFFFFFFFFFFFFFFFFFFFFF::  
FF:FFFFFFFFFF:FFFFFFF::FF,FFFF:FFF::F:FFFFFFFFF,::,FF,FFFFFFFF:FF:FFF  
@A00155:342:HHGFNDSXY:1:1224:2537:11835 2:N:0:GAACCTAG+TCCGCATA  
GGTCTTGTCCAACCTCTGTTTCGGCAGAGGATACCGTGCTCCACAGCTGTAAGGCTGTGGGCCCGAGA  
GAAGTCGCTCTCTCTCGCCCTCCACATCCCTCTCGGCATTGAGATGACCATAGGCCAGAGGTGAGTCC  
+  
FFFFFFFFFFFFFFFFFFFFFFFFFFFFFFFFFFFFFFFFFFFFFFFFFFFFFFFFFFFFFFFFFFFFFFFF  
FFFFFFFFFFFFFFFFFFFFFFFFFFFFFFFFFFFFFFFFFFFFFFFFFFFFFFFFFFFFFFFFFFFFFFFF  
@A00155:342:HHGFNDSXY:1:1224:2889:19523 2:N:0:GAACCTAG+TCCGCATA  
ACTAGGAGACCCCTCCGGTCTTGTCCAACCTCTGTTTCGGCAGAGGATACCGTGCTCCACAGCTGTAA  
GGCTGTGGGCCCGAGAGAAAGTCGCTCTCTCTCGCCCTCCACATCCCTCTCGGCATTGAGATGACCAT  
+  
FFFFFFFFFFFFFFFFFFFFFFFFFFFFFFFFFFFFFFFFFFFFFFFFFFFFFFFFFFFFFFFFFFFFFFFF  
FFFFFFFFFFFFFFFFFFFFFFFFFFFFFFFFFFFFFFFFFFFFFFFFFFFFFFFFFFFFFFFFFFFFFFFF  
@A00155:342:HHGFNDSXY:1:1224:27145:32690 2:N:0:GAACCTAG+TCCGCATA  
AGCCCGGAGTACATCTCCTTTGGAAGTACAGAGACCCCTCCGGTCTTGTCCAACCTCTGTTTCGGCAGA  
GGATACCGTGCTCCACAGCTGTAAGGCTGTGGGCCCGAGAGAAAGTCGCTCTCTCTCGCCC  
+  
FFFFFFFFFFFFFFFFFFFFFFFFFFFFFFFFFFFFFFFFFFFFFFFFFFFFFFFFFFFFFFFFFFFFFFFF  
FFFFFFFFFFFFFFFFFFFFFFFFFFFFFFFFFFFFFFFFFFFFFFFFFFFFFFFFFFFFFFFFFFFFFFFF  
@A00155:342:HHGFNDSXY:1:1224:1325:33254 2:N:0:GAACCTAG+TCCGCATA  
AAAAGGACTCGTCAGGTAGCCTACTAGACTACGACTTACACGGTAGGTCTGAACAAGCCCGGAGTAC  
ATCTCCTTTGGAACCAGGAGACCCCTCCGGTCTTGTCCAACCTCTGTTTCGGCAGAGGATAC  
+  
FFFFFFFFFFFFFFFFFFFFFFFFFFFFFFFFFFFFFFFFFFFFFFFFFFFFFFFFFFFFFFFFFFFFFFFF  
FFFFFFFFFFFFFFFFFFFFFFFFFFFFFFFFFFFFFFFFFFFFFFFFFFFFFFFFFFFFFFFFFFFFFFFF  
@A00155:342:HHGFNDSXY:1:1225:15944:13698 2:N:0:GAACCTAG+TCCGCATA  
GACCCCTCCGGTCTTGTCCAACCTCTGTTTCGGCAGAGGATACCGTGCTCCACAGCTGTAAGGCTGTG  
GGCCCGAGAGAAGTCGCTCTCTCTCGCCCTCCACATCCCTCTCGGCATTGAGATGACCATAGGC  
+  
FFFFFFFFFFFFFFFFFFFFFFFFFFFFFFFFFFFFFFFFFFFFFFFFFFFFFFFFFFFFFFFFFFFFFFFF  
FFFFFFFFFFFFFFFFFFFFFFFFFFFFFFFFFFFFFFFFFFFFFFFFFFFFFFFFFFFFFFFFFFFFFFFF  
@A00155:342:HHGFNDSXY:1:1225:30743:18850 2:N:0:GAACCTAG+TCCGCATA  
AGCCCGGAGTACATCTCCTTTGGAAGTACAGAGACCCCTCCGGTCTTGTCCAACCTCTGTTTCGGCAGA  
GGATACCGTGCTCCACAGCTGTAAGGCTGTGGGCCCGAGAGAAAGTCGCTCTCTCTCGCCCTCCACATC  
+  
FFFFFFFFFFFFFFFFFFFFFFFFFFFFFFFFFFFFFFFFFFFFFFFFFFFFFFFFFFFFFFFFFFFFFFFF  
FFFFFFFFFFFFFFFFFFFFFFFFFFFFFFFFFFFFFFFFFFFFFFFFFFFFFFFFFFFFFFFFFFFFFFFF  
@A00155:342:HHGFNDSXY:1:1226:19786:30467 2:N:0:GAACCTAG+TCCGCATA  
GGACGAACTTACACAACCTCGAAGAGTAACGACGGTTTCGTCCTTGAACGGAAGTACATCAGGGAGCCT  
ACTAGACTCCGACCGTCATGGGGGTTCAAACCCATGCCCGCCACACCGCCTTAGATCAGCTGTGTCC  
+  
FFFFFFFFFFFFFFFFFFFFFFFFFFFFFFFFFFFFFFFFFFFFFFFFFFFFFFFFFFFFFFFFFFFFFFFF  
FFFFFFFFFFFFFFFFFFFFFFFFFFFFFFFFFFFFFFFFFFFFFFFFFFFFFFFFFFFFFFFFFFFFFFFF  
@A00155:342:HHGFNDSXY:1:1227:14841:3333 2:N:0:GAACCTAG+TCCGCATA  
GTGAACAAGCCCGGAGTACATCTCCTTTGGAAGTACAGAGACCCCTCCGGTCTTGTCCAACCTCTGTTT  
CGGCAGAGGATACCGTGCTCCACAGCTGTAAGGCTGTGGGCCCGAGAGAAAGTCGCTCTCTCTCGCCCT  
+



FFFFFFFFFFFFFFFFFFFFFFFFFFFFFFFFFFFFFFFFFFFFFFFFFFFFFFFFFFFFFFFFFFFFFFFFFFFFFF:  
FFFFFFFFFFFFFFFFFFFFFFFFFFFFFFFFFFFFFFFFFFFFFFFFFFFFFFFFFFFFFFFFFFFFFFFFFFFFF  
@A00155:342:HHGFNDSXY:1:1227:27208:17738 2:N:0:GAACCTAG+TCCGCATA  
GAACTAGGAGACCCCCTCCGGTCTTGTC AACCTCTGTTCGGCAGAGGATACCGTGCTCCACAGCTGT  
AAGGCTGTGGGCCCGAGAGAAGTCGCTCTCTCTCGCCCTCCACATCCCTCTCGGCATTGAGATGACCA  
+  
FFFFFFFFFFFFFFFFFFFFFFFFFFFFFFFFFFFFFFFFFFFFFFFFFFFFFFFFFFFFFFFFFFFFFFFFFFF:  
FFFFFFFFFFFFFFFFFFFFFFFFFFFFFFFFFFFFFFFFFFFFFFFFFFFFFFFFFFFFFFFFFFFFFFFFFFF,  
FFFFFFFFFFFFFFFFFFFFFFFFFFFFFFFFFFFFFFFFFFFFFFFFFFFFFFFFFFFFFFFFFFFFFFFFFFF:  
@A00155:342:HHGFNDSXY:1:1227:18258:27289 2:N:0:GAACCTAG+TCCGCATA  
TTTTAGGACGAACTTACACA ACTCGTAGAGTAACGACGGTTTCGTCCTTGGAACGGACTCATCAGGG  
AGCCTACTAGACTCCGACCGTCATGGGGGTCAAACCCATGCCCGCCACACCGCCTTAGATCAGCTG  
+  
FFFFFFFFFFFFFFFFFFFFFFFFFFFFFFFFFFFFFFFFFFFFFFFFFFFFFFFFFFFFFFFFFFFFFFFFFFF:  
FFFFFFFFFFFFFFFFFFFFFFFFFFFFFFFFFFFFFFFFFFFFFFFFFFFFFFFFFFFFFFFFFFFFFFFFFFF:  
@A00155:342:HHGFNDSXY:1:1227:4327:27586 2:N:0:GAACCTAG+TCCGCATA  
AAGGACGAAACCGTCGTTACTCTTCGAGTTGTGTAAGTTTCGTCCTAAAAAGGACTCGTCAGGTAGCC  
TACTAGACTACGACTTACACGGTAGGTCGTGAACAAGCCCGAGTACATCTCCTTTGGA ACTAGGAGA  
+  
FFFFFFFFFFFFFFFFFFFFFFFFFFFFFFFFFFFFFFFFFFFFFFFFFFFFFFFFFFFFFFFFFFFFFFFFFFF:  
FFFFFFFFFFFFFFFFFFFFFFFFFFFFFFFFFFFFFFFFFFFFFFFFFFFFFFFFFFFFFFFFFFFFFFFFFFF,  
FFFFFFFFFFFFFFFFFFFFFFFFFFFFFFFFFFFFFFFFFFFFFFFFFFFFFFFFFFFFFFFFFFFFFFFFFFF:  
@A00155:342:HHGFNDSXY:1:1227:18620:28322 2:N:0:GAACCTAG+TCCGCATA  
TTTTAGGACGAACTTACACA ACTCGTAGAGTAACGACGGTTTCGTCCTTGGAACGGACTCATCAGGG  
AGCCTACTAGACTCCGACCGTCATGGGGGTCAAACCCATGCCCGCCACACCGCCTTAGATCAGCTG  
+  
FFFFFFFFFFFFFFFFFFFFFFFFFFFFFFFFFFFFFFFFFFFFFFFFFFFFFFFFFFFFFFFFFFFFFFFFFFF:  
FFFFF:FFFFFFFFFFFFFFFFFFFFFFFFFFFFFFFFFFFFFFFFFFFFFFFFFFFFFFFFFFFFFFFFFFFFF  
@A00155:342:HHGFNDSXY:1:1227:22914:33411 2:N:0:GAACCTAG+TCCGCATA  
CTGGCCTATGGTCATCTCAATGCCGAGAGGGATGTGAAGGGCGAGAGAGAGCGACTTCTCTCGGGCC  
ACAGCCTTACAGCTGTGGAGCACGGTATCCTCTGCCGAAACAGAGGTTGGACAAGACCGGAG  
+  
FFFFFFFFFFFFFFFFFFFFFFFFFFFFFFFFFFFFFFFFFFFFFFFFFFFFFFFFFFFFFFFFFFFFFFFFFFF:  
FFFFFFFFFFFFFFFFFFFFFFFFFFFFFFFFFFFFFFFFFFFFFFFFFFFFFFFFFFFFFFFFFFFFFFFFFFF  
@A00155:342:HHGFNDSXY:1:1228:32262:14246 2:N:0:GAACCTAG+TCCGCATA  
CGGCAGAGGATACCGTGCTCCACAGCTGTAAGGCTGTGGGCCCGAGAGAAGTCGCTCTCTCTCGCCCT  
CCACATCCCTCTCGGCATTGAGATGACCATAGGCCAGAGGTGAGTCCTTAAGTGGACACAGCTGATCT  
+  
FFFFFFFFFFFFFFFFFFFFFFFFFFFFFFFFFFFFFFFFFFFFFFFFFFFFFFFFFFFFFFFFFFFFFFFFFFF:  
FFFFFFFFFFFFFFFFFFFFFFFFFFFFFFFFFFFFFFFFFFFFFFFFFFFFFFFFFFFFFFFFFFFFFFFFFFF:  
@A00155:342:HHGFNDSXY:1:1228:17544:16814 2:N:0:GAACCTAG+TCCGCATA  
GGACTCGTCAGGTAGCCTACTAGACTACGACTTACACGGTAGGTCGTGAACAAGCCCGGAGTACATCT  
CCTTTGGA ACTAGGAGACCCCTCCGGTCTTGTC AACCTCTGTTTCGGCAGAGGATACCGTGCTCCAC  
+  
FFFFFFF:FFFFFFFFFFFFFFFFFFFFFFFFFFFFFFFFFFFFFFFFFFFFFFFFFFFFFFFFFFFFFFFFFFF:  
FFFFFFFFFFFFFFFFFFFFFFFFFFFFFFFFFFFFFFFFFFFFFFFFFFFFFFFFFFFFFFFFFFFFFFFFFFF:  
@A00155:342:HHGFNDSXY:1:1228:6108:17487 2:N:0:GAACCTAG+TCCGCATA  
AGATCAGCTGTGTCCA TTAAGGACTCACCTCTGGCCTATGGTCATCTCAATGCCGAGAGGGATGTGA  
AGGGCGAGAGAGAGCGACTTCTCTCGGGCCCCACAGCCTTACAGCTGTGGAGCACGGTATCCTCTGCCG  
+  
FFFFFFFFFFFFFFFFFFFFFFFFFFFFFFFFFFFFFFFFFFFFFFFFFFFFFFFFFFFFFFFFFFFFFFFFFFF:  
FFFFFFFFFFFFFFFFFFFFFFFFFFFFFFFFFFFFFFFFFFFFFFFFFFFFFFFFFFFFFFFFFFFFFFFFFFF:  
@A00155:342:HHGFNDSXY:1:1228:10511:18223 2:N:0:GAACCTAG+TCCGCATA  
GTGAACAAGCCCGGAGTACATCTCCTTTGGA ACTAGGAGACCCCTCCGGTCTTGTC AACCTCTGTTT  
CGGCAGAGGATACCGTGCTCCACAGCTGTAAGGCTGTGGGCCCGAGAGAAGTCGCTCTCTCTCG

FFFFFFFFFFFFFFFFFFFFFFFFFFFFFFFFFFFFFFFFFFFFFFFFFFFFFFFFFFFFFFFFFFFFFFFFFFFFF  
FFFFFFFFFFFFFFFFFFFFFFFFFFFFFFFFFFFFFFFFFFFFFFFFFFFFFFFFFFFFFFFFFFFFFFFFFFFFFF:  
@A00155:342:HHGFNDSXY:1:1228:3794:23813 2:N:0:GAACCTAG+TCCGCATA  
GTTGTGTAAGTTTCGTCTCTAAAAAGGACTCGTCAGGTAGCCTACTAGACTACGACTTACACGGTAGGT  
CGTGAACAAGCCCCGGAGTACATCTCCTTTGAACTAGGAGACCCTCCGGTCTTGTTCCAACCTCTGTT  
+  
FFFFFFFFFFFFFF,FFFFFFFFFFFFFFFFFFFFFFFFFFFFFFFFFFFFFFFFFFFFFFFFFFFFFFFFFFFF  
FFFFFFFFFFFFFFFFFFFFFFFFFFFFFFFFFFFFFFFFFFFFFFFFFFFFFFFFFFFFFFFFFFFFFFFFFFF:F  
@A00155:342:HHGFNDSXY:1:1228:27977:27054 2:N:0:GAACCTAG+TCCGCATA  
CGGCAGAGGATACCGTGCTCCACAGCTGTAAGGCTGTGGGCCCGAGAGAAGTCGCTCTCTCGCCCT  
CCACATCCCTCTCGGCATTGAGATGACCATAGGCCAGAGGTGAGTCCTTAAGTGACACAGCTGATCT  
+  
FFFFFFFFFFFFFFFFFFFFFFFFFFFFFFFFFFFFFFFFFFFFFFFFFFFFFFFFFFFFFFFFFFFFFFFFFFFF:  
FFFFFFFFFFFFFFFFFFFFFFFFFFFFFFFFFFFFFFFFFFFFFFFFFFFFFFFFFFFFFFFFFFFFFFFFFFFF:  
@A00155:342:HHGFNDSXY:1:1228:4390:33270 2:N:0:GAACCTAG+TCCGCATA  
TTACACGGTAGGTCTGTGAACAAGCCCCGGAGTACATCTCCTTTGAACTAGGAGACCCTCCGGTCTTG  
TCCAACCTCTGTTTCGGCAGAGGATACCGTGCTCCACAGCTGTAAGGCTGTGGGCCCGAGAGAAGTCG  
+  
FFFFFFFFFFFFFFFFFFFFFFFFFFFFFFFFFFFFFFFFFFFFFFFFFFFFFFFFFFFFFFFFFFFFFFFFFFFF  
FFFFFFFFFFFFFFFFFFFFFFFFFFFFFFFFFFFFFFFFFFFFFFFFFFFFFFFFFFFFFFFFFFFFFFFFFFFF:  
@A00155:342:HHGFNDSXY:1:1229:32127:13166 2:N:0:GAACCTAG+TCCGCATA  
GACCCCTCCGGTCTTGTCCAACCTCTGTTTCGGCAGAGGATACCGTGCTCCACAGCTGTAAGGCTGTG  
GGCCCAGAGAAGTCGCTCTCTCTCGCCCTCCACATCCCTCTCGGCATTGAGATGACCATAGGCCAGA  
+  
FFFFFFFFFFFFFFFFFFFFFFFFFFFFFFFFFFFFFFFFFFFFFFFFFFFFFFFFFFFFFFFFFFFFFFFFFFFF:  
FFFFFFFFFFFFFFFFFFFFFFFFFFFFFFFFFFFFFFFFFFFFFFFFFFFFFFFFFFFFFFFFFFFFFFFFFFFF:  
@A00155:342:HHGFNDSXY:1:1229:26684:23218 2:N:0:GAACCTAG+TCCGCATA  
AAAAGGACTCGTCAGGTAGCCTACTAGACTACGACTTACACGGTAGGTCGTGAACAAGCCCCGGAGTAC  
ATCTCCTTTGAAACCAGGAGACCCTCCGGTCTTGTCCAACCTCTGTTTCGGCAGAGGATACCGTGCT  
+  
FFFFFFFFFFFFFFFFFFFFFFFFFFFFFFFFFFFFFFFFFFFFFFFFFFFFFFFFFFFFFFFFFFFFFFFFFFFF  
FFFFFFFFFFFFFFFFFFFFFFFFFFFFFFFFFFFFFFFFFFFFFFFFFFFFFFFFFFFFFFFFFFFFFFFFFFFF  
@A00155:342:HHGFNDSXY:1:1230:13955:3176 2:N:0:GAACCTAG+TCCGCATA  
GGTCGTGAACAAGCCCCGGAGTACATCTCCTTTGAACTAGGAGACCCTCCGGTCTTGTCCAACCTCT  
GTTTCGGCAGAGGATACCGTGCTCCACAGCTGTAAGGCTGTGGGCCCGAGAGAAGTCGCTCTCTCG  
+  
FFFFFFFFFFFFFFFFFFFFFFFFFFFFFFFFFFFFFFFFFFFFFFFFFFFFFFFFFFFFFFFFFFFFFFFFFFFF  
FFFFFFFFFFFFFFFFFFFFFFFFFFFFFFFFFFFFFFFFFFFFFFFFFFFFFFFFFFFFFFFFFFFFFFFFFFFF:  
@A00155:342:HHGFNDSXY:1:1230:26187:6417 2:N:0:GAACCTAG+TCCGCATA  
ACGAAACCGTCGTTACTCTTGAGTTGTGTAAGTTTCGTCCTAAAAAGGACTCGTCAGGTAGCCTACT  
AGACTACGACTTACACGGTAGGTCGTGAACAAGCCCCGGAGTACATCTCCTTTGAACTAGGAGACCC  
+  
FFFFFFFFFFFFFFFFFFFFFFFFFFFFFFFFFFFFFFFFFFFFFFFFFFFFFFFFFFFFFFFFFFFFFFFFFFFF:  
FFF:FFFFFFFFFFFFFFFFFFFFFFFFFFFFFFFFFFFFFFFFFFFFFFFFFFFFFFFFFFFFFFFFFFFF:  
@A00155:342:HHGFNDSXY:1:1230:1533:11412 2:N:0:GAACCTAG+TCCGCATA  
TAGACTACGACTTACACGGTAGGTCGTGAACAAGCCCCGGAGTACATCTCCTTTGAACTAGGAGACCC  
CTCCGGTCTTGTCCAACCTCTGTTTCGGCAGAGGATACCGTGCTCCACAGCTGTAAGGCTGTGGGCC  
+  
FFFFFFFFFFFFFFFFFFFFFFFFFFFFFFFFFFFFFFFFFFFFFFFFFFFFFFFFFFFFFFFFFFFFFFFFFFFF:  
FFFFFFFFFFFFFFFFFFFFFFFFFFFFFFFFFFFFFFFFFFFFFFFFFFFFFFFFFFFFFFFFFFFFFFFFFFFF:  
@A00155:342:HHGFNDSXY:1:1230:11749:12571 2:N:0:GAACCTAG+TCCGCATA  
TGTCCACTTAAGGACTCACCTCTGGCCTATGGTCATCTCAATGCCGAGAGGGATGTGAAGGGCGAGAG  
AGAGCGACTTCTCTCGGGCCACAGCCTTACAGCTGTGGAGCACGGTATCCTCTGCCGAAACAGAGGT  
+

FFFFFFFFFFFFFFFFFFFFFFFFFFFFFFFFFFFFFFFFFFFFFFFFFFFFFFFFFFFFFFFFFFFFFFFFFFFF  
FFFFFFFFFFFFFFFFFFFFFFFFFFFFFFFFFFFFFFFFFFFFFFFFFFFFFFFFFFFFFFFFFFFFFFFFFFFF  
@A00155:342:HHGFNDSXY:1:1230:19325:13636 2:N:0:GAACCTAG+TCCGCATA  
ACGACTTACACGGTAGGTCGTGAACAAGCCCGGAGTACATCTCCTTTGGAAGTACGAGACCCCTCCGT  
TCTTGTCCAACCTCTGTTTCGGCAGAGGATACCGTGCTCCACAGCTGTAAGGCTGTGGGCCCGAGAGA  
+  
FFFFFFFFFFFFFFFF,FFFFFFFFFFFFFFFFFFFFFFFFFFFFFFFFFFFFFFFFFFFFFFFFFFFFFFFFFFFF  
FFFFFFFFFFFFFFFFFFFFFFFFFFFFFFFFFFFFFFFFFFFFFFFFFFFFFFFFFFFFFFFFFFFFFFFFFFFF  
@A00155:342:HHGFNDSXY:1:1230:29017:34773 2:N:0:GAACCTAG+TCCGCATA  
GTTTCGTCTCTAAAAGGACTCGTCAGGTAGCCTACTAGACTACGACTTACACGGTAGGTCGTGAACAA  
GCCCGGAGTACATCTCCTTTGGAAGTACGAGACCCCTCCGGTCTTGTCCAACCTCTGTTTCGGCAGAG  
+  
FFFF:FFFFFFFFFFFFFFFFFFFFFFFFFFFFFFFFFFFFFFFFFFFFFFFFFFFFFFFFFFFFFFFFFFFF  
FFFFFFFFFFFFFFFFFFFFFFFFFFFFFFFFFFFFFFFFFFFFFFFFFFFFFFFFFFFFFFFFFFFFFFFFFFFF  
@A00155:342:HHGFNDSXY:1:1231:18475:12790 2:N:0:GAACCTAG+TCCGCATA  
AGTACATCTCCTTTGGAAGTACGAGACCCCTCCGGTCTTGTCCAACCTCTGTTTCGGCAGAGGATACC  
GTGCTCCACAGCTGTAAGGCTGTGGGCCCGAGAGAAGTCGCTCTCTCTCGCCCTCCACATCCCTCTCG  
+  
FFFFFFFFFFFFFFFFFFFFFFFFFFFFFFFFFFFFFFFFFFFFFFFFFFFFFFFFFFFFFFFFFFFFFFFFFFFF,FFFFFFFFFFFFFFFFFFFFFFFFFFFFFFFFFFFF  
FFFFFFFFFFFFFFFFFFFFFFFFFFFFFFFFFFFFFFFFFFFFFFFFFFFFFFFFFFFFFFFFFFFFFFFFFFFF,FFFFFFFFFFFFFFFFFFFFFFFFFFFFFFFFFFFF  
@A00155:342:HHGFNDSXY:1:1231:26404:34162 2:N:0:GAACCTAG+TCCGCATA  
CGGCAGAGGATACCGTGCTCCACAGCTGTAAGGCTGTGGGCCCGAGAGAAGTCGCTCTCTCTCGCCCT  
TCACATCCCTCTCGGCATTGAGATGACCATAGGCCAGAGGTGAGTCCTTAAGTGGACACAGCTG  
+  
FFFFFFFFFFFFFFFFFFFF,FFFFFFFFFFFFFFFFFFFFFFFFFFFFFFFFFFFFFFFFFFFFFFFFFFFFFFFFFFFF  
FFFFFFFFFFFFFFFFFFFFFFFFFFFFFFFFFFFFFFFFFFFFFFFFFFFFFFFFFFFFFFFFFFFFFFFFFFFF  
@A00155:342:HHGFNDSXY:1:1232:18014:1313 2:N:0:GAACCTAG+TCCGCATA  
TACGACTTACACGGTAGGTCGTGAACAAGCCCGGAGTACATCTCCTTTGGAACCAGGAGACCCCTCCG  
GTCTTGTCCAACCTCTGTTTCGGCAGAGGATACCGTGCTCCACAGCTGTAAGGCTGTGGGCCCG  
+  
FFFFFFFFFFFFFFFFFFFF,FFFFFF:FFFFFFFFFFFFFFFFFFFFFFFFFFFFFFFFFFFF,FFFF,FFFFFFFFFFFFFFFFFFFF  
FFFF,FFFFFFFFFFFFFFFFFFFFFFFFFFFFFFFFFFFF:,FFFFFFFFFFFFFFFFFFFF:FFFFFFFF:FFFFFFFFFFFF  
@A00155:342:HHGFNDSXY:1:1232:12409:19476 2:N:0:GAACCTAG+TCCGCATA  
CTGGCCTATGGTCATCTCAATGCCGAGAGGGATGTGGAGGGCGAGAGAGAGCGACTTCTCTCGGGCCC  
ACAGCCTTACAGCTGTGGAGCACGGTATCCTCTGCCGAAACAGAGGTTGGACAAGACCGGAG  
+  
FFFFF:FFFFFFFFFFFFFFFFFFFFFFFFFFFFFFFFFFFF:FF:FFFFFFFFFFFFFFFFFFFFFFFFFFFFFFFFFFFF  
FFFFFFFFFFFF:FFFFFFFFFFFFFFFFFFFFFFFFFFFFFFFFFFFFFFFFFFFFFFFFFFFFFFFFFFFFFFFFFFFF  
@A00155:342:HHGFNDSXY:1:1232:31105:20353 2:N:0:GAACCTAG+TCCGCATA  
CAGGTAGCCTACTAGACTACGACTTACACGGTAGGTCGTGAACAAGCCCGGAGTACATCTCCTTTGGA  
ACTAGGAGACCCCTCCGGTCTTGTCCAACCTCTGTTTCGGCAGAGGATACCGTGCTCCACAGCTGTAA  
+  
FFFFFFFFFFFFFFFFFFFFFFFFFFFFFFFFFFFFFFFFFFFFFFFFFFFFFFFFFFFFFFFFFFFFFFFFFFFF  
FFFFFFFFFFFFFFFFFFFFFFFFFFFFFFFFFFFFFFFFFFFFFFFFFFFFFFFFFFFFFFFFFFFFFFFFFFFF  
@A00155:342:HHGFNDSXY:1:1232:3839:22576 2:N:0:GAACCTAG+TCCGCATA  
CTCTTCGAGTTGTGTAAGTTTCGTCTCTAAAAGGACTCGTCAGGTAGCCTACTAGACTACGACTTACA  
CGGTAGGTCGTGAACAAGCCCGGAGTACATCTCCTTTGGAAGTACGAGACCCCTCCGGTCTTGTCCAA  
+  
FFFFFFFFFFFFFFFFFFFFFFFFFFFFFFFFFFFFFFFFFFFF:FFFFFFFFFFFFFFFFFFFF,FFFFFFFFFFFFFFFFFFFFFFFFFFFF  
FF:FFFFFFFFFFFF:FFFF,FFFFFFFFFFFFFFFFFFFF:FF:FFF:F:FFFF,FFFFFFFFFFFF:FFF:F  
@A00155:342:HHGFNDSXY:1:1232:30391:31767 2:N:0:GAACCTAG+TCCGCATA  
CCTACTAGACTACGACTTACACGGTAGGTCGTGAACAAGCCCGGAGTACATCTCCTTTGGAACCAGGA  
GACCCCTCCGGTCTTGTCCAACCTCTGTTTCGGCAGAGGATACCGTGCTCCACAGCTGTAAGGCTGTG  
+

```
FFFFFFFFFFFFFFFFFFFFFFFFFFFFFFFFFFFFFFFFFFFFFFFFFFFFFFFFFFFFFFFFFFFFFFFFFFFF:FFFFFFF
FFFFFFFFFFFFFFFFFFFFFFFFFFFFFFFFFFFFFFFFFFFFFFFFFFFFFFFFFFFFFFFFFFFFFFFFFFFF:FFFFFFF
@A00155:342:HHGFNDSXY:1:1233:2275:3333 2:N:0:GAACCTAG+TCCGCATA
GGAGTACATCTCCTTTGAACTAGGAGACCCCTCCGGTCTTGTC AACCTCTGTTCG GCAGAGGATA
CCGTGCTCCACAGCTGTAAGGCTGTGGGCCCGAGAGAAGTCGCTCTCTCTCGCCCTCTACATCCCTCT
+
FFFFFFFFFFFFFFFFFFFFFFFFFFFFFFFFFFFFFFFFFFFFFFFFFFFFFFFFFFFFFFFFFFFFFFFFFFFF
FFFFFFFFFFFFFFFF: :FFFFFFFFFFFFFFFFFFFFFFFFFFFFFFFFFFFFFFFFFFFFFFFFFFFFFFFF
@A00155:342:HHGFNDSXY:1:1233:12726:9909 2:N:0:GAACCTAG+TCCGCATA
GAACTAGGAGACCCCTCCGGTCTTGTC AACCTCTGTTCG GCAGAGGATACCGTGCTCCACAGCTGT
AAGGCTGTGGGCCCGAGAGAAGTCGCTCTCTCTCGCCCTCCACATCCCTCTCGGCATTGAGATGACGA
+
F:FFFFFFFFFFFFFFFFFFFFFFFFFFFFFFFFFFFFFFFFFFFFFFFFFFFFFFFFFFFFFFFFFFFFFFFF:F,:FFF:
FFFFFFFFFFFFFFFFFFFFFFFFFFFFFFFFFFFFFFFFFFFFFFFFFFFFFFFFFFFFFFFFFFFFFFFF: :FFFF:FF
FFFFFFFFFFFFFFFF:FFFFFFFFFFFFFFFFFFFFFFFFFFFFFFFFFFFFFFFFFFFFFFFFFFFFFFFF:
FFFFFFFFFFFFFFFF,, :FFFF:FFFFF
@A00155:342:HHGFNDSXY:1:1233:4417:26647 2:N:0:GAACCTAG+TCCGCATA
GAAACCGTCGTTACTCTTCGAGTTGTGTAAGTTTCGTCCTAAAAAGGACTCGTCAGGTAGCCTACTAG
ACTACGACTTACACGGTAGGTCGTGAACAAGCCCGGAGTACATCTCTTTTGAACTAGGAGACCCCTC
+
FFFFFFFFFFFFFFFFFFFFFFFFFFFFFFFFFFFFFFFFFFFFFFFFFFFFFFFFFFFFFFFFFFFFFFFFFFFF:
FFFFFFFFFFFFFFFFFFFFFFFFFFFFFFFFFFFFFFFFFFFFFFFFFFFFFFFFFFFFFFFFFFFFFFFFFFFF:
FFFFFFFFFFFFFFFFFFFFFFFFFFFFFFFFFFFFFFFFFFFFFFFFFFFFFFFFFFFFFFFFFFFFFFFFFFFF:
@A00155:342:HHGFNDSXY:1:1234:18656:28416 2:N:0:GAACCTAG+TCCGCATA
GGACTCGTCAGGTAGCCTACTAGACTACGACTTACACGGTAGGTCGTGAACAAGCCCGGAGTACATCT
CCTTTGGAACCAGGAGACCCCTCCGGTCTTGTC AACCTCTGTTCG GCAGAGGATACCGTGCTCCAC
+
FFFFFFFFFFFFFFFFFFFFFFFFFFFFFFFFFFFFFFFFFFFFFFFFFFFFFFFFFFFFFFFFFFFFFFFFFFFF:
FFFFFFFFFFFFFFFFFFFFFFFFFFFFFFFFFFFFFFFFFFFFFFFFFFFFFFFFFFFFFFFFFFFFFFFFFFFF:
FFFFFFFFFFFFFFFFFFFFFFFFFFFFFFFFFFFFFFFFFFFFFFFFFFFFFFFFFFFFFFFFFFFFFFFFFFFF:
@A00155:342:HHGFNDSXY:1:1235:20491:13808 2:N:0:GAACCTAG+TCCGCATA
TTTTCGTCCTAAAAAGGACTCGTCAGGTAGCCTACTAGACTACGACTTACACGGTAGGTCGTGAACAAG
CCCGGAGTACATCTCCTTTGGAACCAGGAGACCCCTCCGGTCTTGTC AACCTCTGTTCG GCAGAGG
+
FFFFFFFFFFFFFFFFFFFFFFFFFFFFFFFFFFFFFFFFFFFFFFFFFFFFFFFFFFFFFFFFFFFFFFFFFFFF,
FFFFFFFFFFFFFFFFFFFFFFFFFFFFFFFFFFFFFFFFFFFFFFFFFFFFFFFFFFFFFFFFFFFFFFFFFFFF:
@A00155:342:HHGFNDSXY:1:1236:16866:4836 2:N:0:GAACCTAG+TCCGCATA
AAAAGGACTCGTCAGGTAGCCTACTAGACTACGACTTACACGGTAGGTCGTGAACAAGCCCGGAGTA
CATCTCCTTTGGACTAGGAGACCCCTCCGGTCTTGTC AACCTCTGTTCG GCAGAGGATACCGTGC
+
FFFF:FFFFFFFFFFFFFFFFFFFFFFFFFFFFFFFFFFFFFFFFFFFFFFFFFFFFFFFFFFFFFFFFFFFFFFFF
FFFFFFFFFFFFFFFFFFFFFFFFFFFFFFFFFFFFFFFFFFFFFFFFFFFFFFFFFFFFFFFFFFFFFFFFFFFF:FF
@A00155:342:HHGFNDSXY:1:1236:26928:12962 2:N:0:GAACCTAG+TCCGCATA
AAACTTACACAACTCGAAGAGTAACGACGGTTTCGTCTTGGAACGGACTCATCAGGGAGCCTACTAG
ACTCCGACCGTCATGGGGGTTCAAACCCATGCCCCGCCACACCGCCTTAGATCAGCTGTGTCCA CT TA
+
FFFFFFFFFFFFFFFFFFFFFFFFFFFFFFFFFFFFFFFFFFFFFFFFFFFFFFFFFFFFFFFFFFFFFFFFFFFF
FFFFFFFFFFFF: FFFFFFFFFFFFFFFFFFFFFFFFFFFFFFFFFFFFFFFFFFFFFFFFFFFFFFFFFFFFFF:F
@A00155:342:HHGFNDSXY:1:1236:28040:25567 2:N:0:GAACCTAG+TCCGCATA
GGTCGTGAACAAGCCCGGAGTACATCTCCTTTGGT ACT AGGAGACCCCTCCGGTCTTGTC AACCTCT
GTTTCG GCAGAGGATACCGTGCTCCACAGCTGTAAGGCTGTGGGCCCGAGAGAAGTCGCTCTCTCTCG
+
FFFFFFFFFFFFFFFFFFFFFFFFFFFFFFFFFFFFFFFFFFFFFFFFFFFFFFFFFFFFFFFFFFFFFFFFFFFF
FFFFFFFFFFFFFFFF: FFFFFFFFFFFFFFFFFFFFFFFFFFFFFFFFFFFFFFFFFFFFFFFFFFFFFF:F
@A00155:342:HHGFNDSXY:1:1236:2772:28369 2:N:0:GAACCTAG+TCCGCATA
CGTCCTAAAAAGGACTCGTCAGGTAGCCTACTAGACTACGACTTACACGGTAGGTCGTGAACAAGCCC
GGAGTACATCTCCTTTGGACTAGGAGACCCCTCCGGTCTTGTC AACCTCTGTTCG GCAGAGGATA
```

FFFFFF:FFF,FFFFFFFFFFFFFFFFFFFFFFFFFFFFFFFFFFFFFFFFFFFFFFFFFFFFFFFFFFFFFFFF  
FFFFFFFFFFFFFFFFFFFFFFFFFFFFFFFFFFFFFFFFFFFFFFFFFFFFFFFFFFFFFFFFFFFFFFFFFFFF  
@A00155:342:HHGFNDSXY:1:1237:15655:16329 2:N:0:GAACCTAG+TCCGCATA  
TTGGAAGTACTAGGAGACCCCTCCGGTCTTGTCCAACCTCTGTTTCGGCAGAGGATACCGTGCTCCACAGC  
TGTAAGGCTGTGGGCCCGAGAGAAGTCGCTCTCTCTCGCCCTCTACATCCCTCTCGGCATTGAGATGA  
+  
,FFFFFFFFFFFFFFFFFFFFFFFFFFFFFFFFFFFFFFFFFFFFFFFFFFFFFFFFFFFFFFFFFFFFFFFF  
FFFFFFFFFFFFFFFFFFFFFFFFFFFFFFFFFFFFFFFFFFFFFFFFFFFFFFFFFFFFFFFFFFFFFFFFFFFF:FFF:FFFFFFFF  
@A00155:342:HHGFNDSXY:1:1237:17626:31548 2:N:0:GAACCTAG+TCCGCATA  
GTGTAAGTTTCGTCTCTAAAAAGGACTCGTCAGGTAGCCTACTAGACTACGACTTACACGGTAGGTCGT  
GAACAAGCCCGGAGTACATCTCCTTTGGAAGTACTAGGAGACCCCTCCGGTCTTGTCCAACCTCTGTTTCG  
+  
FF:FFFFFFFF:FFFFFFFFFFFFFFFFFFFFFFFFFFFFFFFFFFFFFFFFFFFFFFFFFFFFFFFFFFFF:FFFFF  
FFFFFFFFFFFFFFFFFFFFFFFFFFFFFFFFFFFFFFFFFFFFFFFFFFFFFFFFFFFFFFFFFFFFFFFFFFFF:FFFFFFFFFFFF  
@A00155:342:HHGFNDSXY:1:1238:27434:9674 2:N:0:GAACCTAG+TCCGCATA  
TCTCCTTTGGAACAGGAGACCCCTCCGGTCTTGTCCAACCTCTGTTTCGGCAGAGGATACCGTGCTC  
CACAGCTGTAAGGCTGTGGGCCCGAGAGAAGTCGCTCTCTCTCGCCCTCCACATCCCTCTCGGCATTG  
+  
FFFFFFFFFFFF:FFFFFFFFFFFFFFFFFFFFFFFFFFFFFFFFFFFFFFFFFFFFFFFFFFFFFFFFFFFFF  
FFFFFFFFFFFFFFFFFFFFFFFFFFFFFFFFFFFFFFFFFFFFFFFFFFFFFFFFFFFFFFFFFFFFFFFFFFFF:FF  
@A00155:342:HHGFNDSXY:1:1240:28230:4758 2:N:0:GAACCTAG+TCCGCATA  
GTAGGTCGTGAACAAGCCCGGAGTACATCTCCTTTGGAAGTACTAGGAGACCCCTCCGGTCTTGTCCAAC  
TCTGTTTCGGCAGAGGATACCGTGCTCCACAGCTGTAAGGCTGTGGGCCCGAGAGAAGTCGCTCTCTC  
+  
FF:FFFFFFFFFFFFFFFFFFFFFFFFFFFFFFFFFFFFFFFFFFFFFFFFFFFFFFFFFFFFFFFFFFFFF  
FFFFFFFFFFFFFFFFFFFFFFFFFFFFFFFFFFFFFFFFFFFFFFFFFFFFFFFFFFFFFFFFFFFFFFFFFFFF:FFFFFFFFFFFF  
@A00155:342:HHGFNDSXY:1:1240:16233:6934 2:N:0:GAACCTAG+TCCGCATA  
CAAGGACGAAACCGTCGTTACTCTTTGAGTTGTGTAAGTTTCGTCTCTAAAAAGGACTCGTCAGGTAGC  
CTACTAGACTACGACTTACACGGTAGGTCGTGAACAAGCCCGGAGTACATCTCCTTTGGAAGTACTAGGAG  
+  
FFFFFFFFFFFFFFFFFFFFFFFFFFFFFFFFFFFFFFFFFFFFFFFFFFFFFFFFFFFFFFFFFFFFFFFFFFFF,FFFFFFFFFFFFFFFFFFFFFFFFFFFFFFFFFFFFFFFFFFFFFFFFFFFFFFFFFFFFFFFF  
FFFFFFFFFFFFFFFFFFFFFFFFFFFFFFFFFFFFFFFFFFFFFFFFFFFFFFFFFFFFFFFFFFFFFFFFFFFF:FFFFF,FFFFFFFFFFFF  
@A00155:342:HHGFNDSXY:1:1240:4137:9408 2:N:0:GAACCTAG+TCCGCATA  
TACGACTTACACGGTAGGTCGTGAACAAGCCCGGAGTACATCTCCTTTGGAAGTACTAGGAGACCCCTCCG  
GTCTTGTCCAACCTCTGTTTCGGCAGAGGATACCGTGCTCCACAGCTGTAAGGCTGTGGGCCCG  
+  
FFFFFFFFFFFFFFFFFFFF:FFFFFFFFFFFFFFFFFFFFFFFFFFFFFFFFFFFFFFFFFFFFFFFFFFFFFFFFFFFF:FFFFF:FFFFFFFF  
FFFFFFFFFFFFFFFFFFFFFFFFFFFF:FFFFFFFFFFFFFFFFFFFF:FFFFFFFFFFFFFFFFFFFFFFFFFFFF:FFF  
@A00155:342:HHGFNDSXY:1:1240:6370:10864 2:N:0:GAACCTAG+TCCGCATA  
TACGACTTACACGGTAGGTCGTGAACAAGCCCGGAGTACATCTCCTTTGGAAGTACTAGGAGACCCCTCCG  
GTCTTGTCCAACCTCTGTTTCAGCAGAGGATACCGTGCTCCACAGCTGTAAGGCTGTGGGCCCG  
+  
FFFFFFFFFFFFFFFFFFFFFFFFFFFFFFFFFFFFFFFFFFFFFFFFFFFFFFFFFFFFFFFFFFFFFFFFFFFF:FFFFFFFF  
FFFFFFFFFFFFFFFFFFFFFFFFFFFF:FFFFFFFFFFFFFFFFFFFFFFFFFFFFFFFFFFFFFFFFFFFFFFFFFFFF  
@A00155:342:HHGFNDSXY:1:1240:4580:18881 2:N:0:GAACCTAG+TCCGCATA  
ACTCTTGAGTTGTGTAAGTTTCGTCTCTAAAAAGGACTCGTCAGGTAGCCTACTAGACTACGACTTAC  
ACGGTAGGTCGTGAACAAGCCCGGAGTACATCTCCTTTGGAAGTACTAGGAGACCCCTCCGGTCTTGTCCA  
+  
FFFF:FFFFFFFFFFFF:FFFFFFFF:FFFFFFFFFFFFFFFFFFFFFFFFFFFF:FFFFF:FFFFF,F:FF:FF  
FFFFFFFFFFFF:FFF,FFFFFFFFFFFF,FFFFF:F:FFFF:FFFFFFFFFFFF,FFF:FFFFFFFFFFFF  
@A00155:342:HHGFNDSXY:1:1241:6361:3114 2:N:0:GAACCTAG+TCCGCATA  
AGCCCGGAGTACATCTCCTTTGGAAGTACTAGGAGACCCCTCCGGTCTTGTCCAACCTCTGTTTCGGCAGA  
GGATACCGTGCTCCACAGCTGTAAGGCTGTGGGCCCGAGAGAAGTCGCTCTCTCTCGCCCTCTACATC  
+

[illegible]

FFFFFFFFFFFFFFFFFFFFFFFF,FF,FFF:FFFFFFFFFFFFFFFFFFFFFFFFFFFFFFFFFFFFFFFF  
FFFFFFFFFFFFFFFFFFFFFFFFFFFFFFFFFFFFFFFFFFFFFFFFFFFFFFFFFFFFFFFFFFFFFFFF:FFFFFFFFFFFFFFFF:FFFFFFFFFFFFFFFF,FFFF  
@A00155:342:HHGFNDSXY:1:1244:26856:6167 2:N:0:GAACCTAG+TCCGCATA  
ACTCTTCGAGTTGTGTAAGTTTCGTCCTAAAAAGGACTCGTCAGGTAGCCTACTAGACTACGACTTAC  
ACGGTAGGTCGTGAACAAGCCCGGAGTACATCTCCTTTGGAACCAGGAGACCCCTCCGGTCTTGTCCA  
+  
FFFFFFFFFFFF,FFFFFFFFFFFFFFFFFFFFFFFFFFFFFFFFFFFFFFFFFFFFFFFFFFFFFFFFFFFFFFFF  
FFFFFFFFFFFFFFFFFFFFFFFFFFFFFFFFFFFFFFFFFFFFFFFFFFFFFFFFFFFFFFFFFFFFFFFF:FF:FFFFFFFFFFFFFFFF  
@A00155:342:HHGFNDSXY:1:1244:32931:10300 2:N:0:GAACCTAG+TCCGCATA  
CAAGGACGAAACCGTCGTTACTCTTTGAGTTGTGTAAGTTTCGTCCTAAAAAGGACTCGTCAGGTAGC  
CTACTAGACTACGACTTACACGGTAGGTCGTGAACAAGCCCGGAGTACATCTCCTTTGGAAGTAGGAG  
+  
FFFFFFFFFFFFFFFFFFFFFFFFFFFFFFFF,FFFFF:FFFFFFFFF:FFFFFFFFF:FFFFFFFFFFFFFFFF  
FFFFFFFFFFFFFFFFFFFFFFFF:FFFF,FFFFFFFFFFFFFFFFFFFFFFFFFFFFFFFFFFFFFFFF:FFFFFFFFFFFFFFFF  
@A00155:342:HHGFNDSXY:1:1244:5846:33536 2:N:0:GAACCTAG+TCCGCATA  
TTACACGGTAGGTCGTGAACAAGCCCGGAGTACATCTCCTTTGGAACCAGGAGACCCCTCCGGTCTTG  
TCCAACCTCTGTTTCGGCAGAGGATACCGTGCTCCACAGCTGTAAGGCTGTGGGCCCGAGAGAAGTCG  
+  
FFFFFFFFFFFFFFFFFFFFFFFFFFFFFFFFFFFFFFFFFFFFFFFFFFFFFFFFFFFFFFFFFFFFFFFF:FFFFFFFFFFFFFFFF:FF  
FFFFFFFFFFFFFFFFFFFFFFFF:FFFFFFFFFFFFFFFFFFFFFFFFFFFFFFFFFFFFFFFFFFFFFFFF:FF  
@A00155:342:HHGFNDSXY:1:1245:22788:4319 2:N:0:GAACCTAG+TCCGCATA  
TAGGAGACCCCTCCGGTCTTGTCCAACCTCTGTTTCGGCAGAGGATACCGTGCTCCACAGCTGTAAGG  
CTGTGGGCCCGAGAGAAGTCGCTCTCTCTCGCCCTCCACATCCCTCTCGGCATTGAGATGACCATAGG  
+  
FFFFFFFFFFFFFFFFFFFFFFFFFFFFFFFFFFFFFFFFFFFFFFFFFFFFFFFFFFFFFFFFFFFFFFFFFFFF  
FFFFFFFFFFFFFFFFFFFFFFFFFFFFFFFFFFFFFFFFFFFFFFFFFFFFFFFFFFFFFFFFFFFFFFFFFFFF  
@A00155:342:HHGFNDSXY:1:1245:14018:8015 2:N:0:GAACCTAG+TCCGCATA  
TCTCCTTTGGAACCAGGAGACCCCTCCGGTCTTGTCCAACCTCTGTTTCGGCAGAGGATACCGTGCTC  
CACAGCTGTAAGGCTGTGGGCCCGAGAGAAGTCGCTCTCTCTCGCCCTCCACATCCCTCTCGGCATTG  
+  
FFFFFFFFFFFFFFFFFFFFFFFFFFFFFFFFFFFFFFFFFFFFFFFFFFFFFFFFFFFFFFFFFFFFFFFFFFFF  
FFFFFFFFFFFFFFFFFFFFFFFFFFFFFFFFFFFFFFFFFFFFFFFFFFFFFFFFFFFFFFFFFFFFFFFFFFFF  
@A00155:342:HHGFNDSXY:1:1245:21558:27054 2:N:0:GAACCTAG+TCCGCATA  
GTGTAAGTTTCGTCCTAAAAAGGACTCGTCAGGTAGCCTACTAGACTACGACTTACACGGTAGGTCGT  
GAACAAGCCCGGAGTACATCTCCTTTGGAAGTAGGAGACCCCTCCGGTCTTGTCCAACCTCTGTTTCG  
+  
FFFFFFFFFFFF::FFFFFFFF:FFFFFFFFFFFFFFFFFFFFFFFFFFFFFFFFFFFFFFFF:FFFFFFFFFFFFFFFF:FF:F,  
FFFFFFFFFFFFFFFFFFFFFFFFFFFFFFFFFFFFFFFF,FF:FF:FF:FFFFFFFFFFFFFFFF:FFFF:FFF:FF  
@A00155:342:HHGFNDSXY:1:1245:14986:30953 2:N:0:GAACCTAG+TCCGCATA  
GGAAGTAGGAGACCCCTCCGGTCTTGTCCAACCTCTGTTTCGGCAGAGGATACCGTGCTCCACAGCTG  
TAAGGCTGTGGGCCCGAGAGAAGTCGCTCTCTCTCGCCCTCCACATCCCTCTCGGCATTGAGATGACC  
+  
FFFFFFFFFFFFFFFFFFFFFFFFFFFFFFFF,FFFFFFFFFFFFFFFFFFFFFFFFFFFFFFFFFFFFFFFFFFFF  
:FFFFFFFFFFFFFFFFFFFFFFFFFFFFFFFFFFFFFFFFFFFFFFFFFFFFFFFFFFFFFFFFFFFF:,FFFF:FFFF  
@A00155:342:HHGFNDSXY:1:1246:11921:10457 2:N:0:GAACCTAG+TCCGCATA  
GAAACCGTCGTTACTCTTTGAGTTGTGTAAGTTTCGTCCTAAAAAGGACTCGTCAGGTAGCCTACTAG  
ACTACGACTTACACGGTAGGTCGTGAACAAGCCCGGAGTACATCTCCTTTGGAAGTAGGAGACCCCTC  
+  
FFFFFFFFFFFFFFFFFFFFFFFFFFFFFFFFFFFFFFFF,FFFFFF:,FFFFFFFFFFFFFFFFFFFFFFFFFFFF,F  
FFFFFFFFFFFFFFFFFFFFFFFFFFFFFFFFFFFFFFFFFFFFFFFFFFFFFFFFFFFFFFFFFFFFFFFF:FF:FFFFFFFFFFFFFFFF  
@A00155:342:HHGFNDSXY:1:1246:17363:14215 2:N:0:GAACCTAG+TCCGCATA  
TACATCTCCTTTGGAAGTAGGAGACCCCTCCGGTCTTGTCCAACCTCTGTTTCGGCAGAGGATACCGT  
GCTCCACAGCTGTAAGGCTGTGGGCCCGAGAGAAGTCGCTCTCTCTCGCCCTCTACATCCCTCTCGGC  
+

FFFFFFFFFFFFFFFFFFFFFFFFFFFFFFFFFFFFFFFFFFFFFFFFFFFFFFFFFFFFFFFFFFFFFFFFFFFFFFFF  
FFFFFFFFFFFFFFFFFFFFFFFFFFFFFFFFFFFFFFFFFFFFFFFFFFFFFFFFFFFFFFFFFFFFFFFFFFFFFFFF  
@A00155:342:HHGFNDSXY:1:1246:23999:14747 2:N:0:GAACCTAG+TCCGCATA  
GTAGGTCGTGAACAAGCCCCGGAGTACATCTCCTTTGGAAGTAGGAGACCCCTCCGGTCTTGCCAACC  
TCTGTTTTCGGCAGAGGATACCGTGCTCCACAGCTGTAAGGCTGTGGGCCCGAGAGAAGTCGCTCTCTC  
+  
FF:FFFFFFFFFFFFFFFFFFFFFFFFFFFFFFFFFFFFFFFFFFFFFFFFFFFFFFFFFFFFFFFFFFFFF:FFFFFF:FFF  
FF:F:FFFF:FFFF:FFFFFFFF:FFFFFF:FFFFFFFFFFFFFFFFFFFFFFFFFFFFFFFFFFFFFFFF  
@A00155:342:HHGFNDSXY:1:1246:2582:15452 2:N:0:GAACCTAG+TCCGCATA  
ACATCTCCTTTGGAAGTAGGAGACCCCTCCGGTCTTGCCAACCTCTGTTTCGGCAGAGGATACCGTG  
CTCCACAGCTGTAAGGCTGTGGGCCCGAGAGAAGTCGCTCTCTCTCGCCCTCTACATCCCTCTCGGCA  
+  
FFFFFFFF:FFFFFFFFFFFFFFFFFFFFFFFF::FFF,:FFFFFFFF:F:,FFF,:FFFFF::F,FFF:FF  
FFFF:FF:F:FFFF,FFF:FFFF,,FFFFFF,FF:F:F:F:FFFFFFFF,F:FFFF:F:F:F:F:  
@A00155:342:HHGFNDSXY:1:1247:30779:13463 2:N:0:GAACCTAG+TCCGCATA  
CTGATCTAAGCGGTGTGGCGGGCATGGGTTTGAACCCCATGACGGTCGGAGTCTAGTAGGCTCCC  
TGATGAGTCCGTTCCAAGGACGAAACCGTCGTTACTCTTCGAGTTGTGTAAGTTTCGTCTAAAAGG  
+  
FFFFFFFFFFFFFFFFFFFFF:FFFFFFFFFFFFFFFFFFFFFFFFFFFFFFFFFFFFFFFFFFFFFFFFFFFFF  
FFFFFF:FFFFFFFFFFFFFFFFFFFFFFFFFFFFFFFFFFFFF:FFFFFF:FFFFFFFFFFFF:FFFFFF  
@A00155:342:HHGFNDSXY:1:1247:31322:26303 2:N:0:GAACCTAG+TCCGCATA  
GAGACCCCTCCGGTCTTGCCAACCTCTGTTTCGGCAGAGGATACCGTGCTCCACAGCTGTAAGGCTG  
TGGGCCCGAGAGAAGTCGCTCTCTCTCGCCCTCCACATCCCTCTCGGCATAGAGATGACCATAGGCCA  
+  
FFFFFFFFFFFFFFFFFFFFFFFFFFFFFFFFFFFFFFFFFFFFFFFFFFFFFFFFFFFFFFFFFFFFFFFFFFFF,F  
F:FFFFFFFFFFFFFFFFFFFFFFFFFFFFFFFFFFFFF:FFFFFFFFFFFFF:FFFFFFFFFFFFFFFFFFFF  
@A00155:342:HHGFNDSXY:1:1247:23854:34194 2:N:0:GAACCTAG+TCCGCATA  
AAGGACTCGTCAGGTAGCCTACTAGACTACGACTTACACGGTAGGTCGTGAACAAGCCCCGGAGTACAT  
CTCCTTTGGAAGTAGGAGACCCCTCCGGTCTTGCCAACCTCTGTTTCGGCAGAGGATACCGTG  
+  
FFFFFFFFFFFFFFFFFFFFFFFFFFFFFFFFFFFFFFFFFFFFFFFFFFFFFFFFFFFFFFFFFFFFFFFFFFFFF  
FFFFFFFFFFFFFFFFFFFFFFFFFFFFFFFFFFFFFFFFFFFFFFFFFFFFFFFFFFFFFFFFFFFFFFFFFFFF  
@A00155:342:HHGFNDSXY:1:1248:19497:35321 2:N:0:GAACCTAG+TCCGCATA  
GTAAGTTTCGTCTAAAAGGACTCGTCAGGTAGCCTACTAGACTACGACTTACACGGTAGGTCGTGA  
ACAAGCCCCGGAGTACATCTCCTTTGGAAGTAGGAGACCCCTCCGGTCTTGCCAACCTCTGTTTCGGC  
+  
FFFFFFFFFFFFFFFFFFFFFFFFFFFFFFFFFFFFF:FFFFFFFFFFFFFFFFFFFFFFFFFFFFFFFFFFFFF  
FFFF:FFFFFFFFFFFFF:FFFFFFFFFFFFFFFFFFFFF:FF:FFFFFFFF:FFFFFFFFF,FFF:FF  
@A00155:342:HHGFNDSXY:1:1249:18837:10817 2:N:0:GAACCTAG+TCCGCATA  
ACTTACACGGTAGGTCGTGAACAAGCCCCGGAGTACATCTCCTTTGGAAGTAGGAGACCCCTCCGGTCT  
TGCCAACCTCTGTTTCGGCAGAGGATACCGTGCTCCACAGCTGTAAGGCTGTGGGCCCGAGAGAAGT  
+  
FFFFFFFFF,FFFFFF:FFFFF,FFFFFFFFFFFFFFFFFFFFFFFFFFFFF:FFFF:F,FFFFFF,FFF  
F,FF:FFFFFFFF,FFFFFFFFFFFFFFFFFFFFF:FFFFFFFFFFFFF:FFFFFFFFF,FFF:F:FFF,FFFF  
@A00155:342:HHGFNDSXY:1:1249:22299:20415 2:N:0:GAACCTAG+TCCGCATA  
AAGGACTCGTCAGGTAGCCTACTAGACTACGACTTACACGGTAGGTCGTGAACAAGCCCCGGAGTACAT  
CTCCTTTGGAAGTAGGAGACCCCTCCGGTCTTGCCAACCTCTGTTTCGGCAGAGGATACCGTGCTCC  
+  
FFFFFFFFFFFFFFFFFFFFFFFFFFFFFFFFFFFFFFFFFFFFFFFFFFFFFFFFFFFFFFFFFFFFF:FFFFFFF  
FFFFFFFFFFFFFFFFFFFFF:FFFFFFFFFFFFFFFFFFFFFFFFFFFFFFFFFFFFF:FFFFFFFFF  
@A00155:342:HHGFNDSXY:1:1249:8006:26036 2:N:0:GAACCTAG+TCCGCATA  
ACTAGACTACGACTTACACGGTAGGTCGTGAACAAGCCCCGGAGTACATCTCCTTTGGAAGTAGGAGAC  
CCCTCCGGTCTTGCCAACCTCTGTTTCGGCAGAGGATACCGTGCTCCACAGCTGTAAGGCTGTGGGC  
+



FFFFFFFFFFFFFFFFFFFFFFFFFFFFFFFFFFFFFFFFFFFFFFFFFFFFFFFFFFFFFFFFFFFFFFFFFFFFFFFF  
FFFFFFFFFFFFFFFFFFFFFFFFFFFFFFFFFFFFFFFFFFFFFFFFFFFFFFFFFFFFFFFFFFFFFFFFFFFFFFFF: FFFFFFFF  
@A00155:342:HHGFNDSXY:1:1249:26964:35571 2:N:0:GAACCTAG+TCCGCATA  
CCTACTAGACTACGACTTACACGGTAGGTCGTGAACAAGCCCGGAGTACATCTCCTTTGGAACCAGGA  
GACCCCTCCGGTCTTGTCCAACCTCTGTTTCGGCAGAGGATACCGTGCTCCACAGCTGTAAGGCTGTG  
+  
: FFFFFFF, FFFFF, FFFFFFFFFFFFFFFFFFFFFFFFFFFFFFFFFFFFFFFFFFFFFFFFFF: F: FFFFFFFF: FFFFFFFF: F: F: FFFFFFFF  
FFFFFFFFFFFFFFFFFFFFFFFFFFFFFFFFFFFFFFFFFFFFFFFFFFFFFFFFFFFFFFFFFFFFFFFFFFFFFFFF  
@A00155:342:HHGFNDSXY:1:1250:16224:14465 2:N:0:GAACCTAG+TCCGCATA  
GAGACCCCTCCGGTCTTGTCCAACCTCTGTTTCGGCAGAGGATACCGTGCTCCACAGCTGTAAGGCTG  
TGGGCCCCGAGAGAAGTCGCTCTCTCTCGCCCTCCACATCCCTCTCGGCATTGAGATGACCATAGGCCA  
+  
: FFFFFFFF: FF: F: FFFFFFFF: : F, FFFFF: FF: FFFFFFFFFFFFFFFFFFFFFFFFFF: F: F: FFFF: : FF:  
F: , F: F, FFFFFFF: F: : FFFFF: F: , : FFFFFFF: FFFFFFFF: FF, F, FFFFFFF: FFFFFFFF  
@A00155:342:HHGFNDSXY:1:1250:30553:27915 2:N:0:GAACCTAG+TCCGCATA  
GGACTCGTCAGGTAGCCTACTAGACTACGACTTACACGGTAGGTCGTGAACAAGCCCGGAGTACATCT  
CCTTTGGAAGTACTAGGAGACCCCTCCGGTCTTGTCCAACCTCTGTTTCGGCAGAGGATACCGTGCTCCAC  
+  
FFFFFFFFFFFFFFFF: FFFFFFFFFFFFFFFFFFFFFFFFFFFFFFFFFFFFFFFFFFFFFFFFFFFFFFFFFF  
FFF: FFFFFFFFFFFFFFFFFFFFFFFFFFFFFFFFFFFFFFFFFFFFFFFFFFFFFFFFFFFFFFFFFF  
@A00155:342:HHGFNDSXY:1:1251:30192:6433 2:N:0:GAACCTAG+TCCGCATA  
AGGACGAAACCGTCGTAACCTCTTCGAGTTGTGTAAGTTTCGTCCTAAAAAGGACTCGTCAGGTAGCCT  
ACTAGACTACGACTTACACGGTAGGTCGTGAACAAGCCCGGAGTACATCTCCTTTGGAAGTACTAGGAGAC  
+  
FFFFFFFFFFFFFFFFFFFFFFFFFFFF: : F: FFFFFFFFFFFFFFFFFFFFFFFFFF: FFFFFFFFFFFFFFFFFFFFFFFFFF  
FFFFFFFFFFFFFFFFFFFFFFFFFFFFFFFFFFFFFFFFFFFFFFFFFFFFFFFFFFFFFFFFFFFFFFFFF  
@A00155:342:HHGFNDSXY:1:1252:16550:4225 2:N:0:GAACCTAG+TCCGCATA  
CACGGTAGGTCGTGAACAAGCCCGGAGTACATCTCCTTTGGAAGTACTAGGAGACCCCTCCGGTCTTGTCC  
AACCTCTGTTTCGGCAGAGGATACCGTGCTCCACAGCTGTAAGGCTGTGGGCCCGAGAGAAGTCGCTC  
+  
FFFFFFFFFFFFFFFFFFFFFFFFFFFFFFFFFFFFFFFFFFFFFFFFFFFFFFFFFFFFFFFFFFFFFFFFF, FFFF  
FFFFFFFFFFFFFFFFFFFFFFFFFFFFFFFFFFFFFFFFFFFFFFFFFFFFFFFFFFFFFFFFFFFFFFFFF: FFFFFFFF  
@A00155:342:HHGFNDSXY:1:1252:14805:12164 2:N:0:GAACCTAG+TCCGCATA  
CATGGGGGTTTAAACCCATGCCCCGCCACACCGCCTTAGATCAGCTGTGTCCACTTAAGGACTCACCT  
CTGGCCTATGGTCATCTCAATGCCGAGAGGGATGTGGAGGGCGAGAGAGAGCGACTTCTCTCGGGCCC  
+  
FFFFFFFFFFFFFFFFFFFFFFFFFFFFFFFFFFFFFFFFFFFFFFFFFFFFFFFFFFFFFFFFFFFFFFFF: FFFF  
FFFFFFF, FFFFFFFFFFFFFFFFFFFFFFFFFFFFFFFFFFFFFFFFFFFFFFFFFFFFFFFFFFFFFFFFFF  
@A00155:342:HHGFNDSXY:1:1252:32145:24815 2:N:0:GAACCTAG+TCCGCATA  
ACATCTCCTTTGGAAGTACTAGGAGACCCCTCCGGTCTTGTCCAACCTCTGTTTCGGCAGAGGATACCGTG  
CTCCACAGCTGTAAGGCTGTGGGCCCGAGAGAAGTCGCTCTCTCTCGCCCTCTACATCCCTCTCGGCA  
+  
FFFFFFFFFFFFFFFFFFFFFFFFFFFFFFFFFFFFFFFFFFFFFFFFFFFFFFFFFFFFFFFFFFFFFFFFF  
FFFFFFFFFFFFFFFF: FFFFFFFFFFFFFFFFFFFFFFFFFF: FFFFFFFFFFFFFFFFFFFFFFFFFF  
@A00155:342:HHGFNDSXY:1:1252:7265:30264 2:N:0:GAACCTAG+TCCGCATA  
ACTAGACTACGACTTACACGGTAGGTCGTGAACAAGCCCGGAGTACATCTCCTTTGGAAGTACTAGGAGAC  
CCCTCCGGTCTTGTCCAACCTCTGTTTCGGCAGAGGATACCGTGCTCCACAGCTGTAAGGCTGTGGGC  
+  
FFFF: FFFFFFFFFFFFFFFFFFFFFFFFFFFFFFFFFFFFFFFFFF: FFFFFFFFFFFFFFFFFFFFFFFFFF, F  
FFF: FFFFFFFFFFFFFFFFFFFFFFFFFFFFFFFFFF: FFFFFFFFFFFFFFFFFFFFFFFFFF  
@A00155:342:HHGFNDSXY:1:1253:26648:5306 2:N:0:GAACCTAG+TCCGCATA  
GGTCGTGAACAAGCCCGGAGTACATCTCCTTTGGAAGTACTAGGAGACCCCTCCGGTCTTGTCCAACCTCT  
GTTTCGGCAGAGGATACCGTGCTCCACAGCTGTAAGGCTGTGGGCCCGAGAGAAGTCACTCTCTCTCG

FF:FFFFFFFFFFFFFF:FFFFFF:FFFFFFFFFFFFFFFFFFFFFFFFFFFFFFFFFFFFFFFFFFFFFFFF  
FFFFFFFFFFFFFF::FFFFFFFFFFFFFFFFFFFFFFFFFFFFFFFFFFFFFFFFFFFFFFFFFFFFFFFF  
@A00155:342:HHGFNDSXY:1:1253:4589:27571 2:N:0:GAACCTAG+TCCGCATA  
AGGACGAAACCGTCGTTACTCTTCGAGTTGTGTAAGTTTCGTCCTAAAAAGGACTCGTCAGGTAGCCT  
ATTAGACTACGACTTACACGGTAGGTCGTGAACAAGCCCGGAGTACATCTCCTTTGGAAGTAGGAGAC  
+  
FFFFFFFFFFFFFFFFFFFFFF:FFFFFFFFFFFFFFFFFFFFFF:FFFFFFFFFFFFFFFFFFFFFF:FFFF  
FFFFFFFFFFFFFFFFFFFFFFFFFFFFFFFFFFFFFFFFFFFFFFFFFFFFFFFFFFFFFFFFFFFFFFFF  
@A00155:342:HHGFNDSXY:1:1254:5873:20776 2:N:0:GAACCTAG+TCCGCATA  
TGTGTAAGTTTCGTCCTAAAAAGGACTCGTCAGGTAGCCTACTAGACTACGACTTACACGGTAGGTCG  
TGAACAAGCCCGGAGTACATCTCCTTTGGAAGTAGGAGACCCCTCCGGTCTTGTCCAACCTCTGTTTC  
+  
FFFFFFFFFFFFFF,FFFFFFFF:FFFFFFFFFFFFFF,FFFFFFFFFFFFFF:F:FFFFFFFFFFFFFF:  
FFF:FFF:FFFFFFFFFFFFFFFFFFFFFFFFFFFFFFFFFFFFFFFFFFFFFFFFFFFFFFFFFFFFFFF  
@A00155:342:HHGFNDSXY:1:1255:1922:3724 2:N:0:GAACCTAG+TCCGCATA  
GTTGTGTAAGTTTCGTCCTAAAAAGGACTCGTCAGGTAGCCTACTAGACTACGACTTACACGGTAGGT  
CGTGAACAAGCCCGGAGTACATCTCCTTTGGAAGTAGGAGACCCCTCCGGTCTTGTCCAACCTCTGTT  
+  
FFFFFFFFFFFFFFFFFFFFFFFFFFFFFFFFFFFFFFFFFFFFFFFFFFFFFFFFFFFFFFFFFFFFFF:FFF  
FFFFFFFFFFFFFFFFFFFFFFFFFFFFFFFFFFFFFFFFFFFFFFFFFFFFFFFFFFFFFFFFFFFFFFFF  
@A00155:342:HHGFNDSXY:1:1255:2220:6840 2:N:0:GAACCTAG+TCCGCATA  
TCTCCTTTGGAAGTAGGAGACCCCTCCGGTCTTGTCCAACCTCTGTTACGGCAGAGGATACCGTGCTC  
CACAGCTGTAAGGCTGTGGGCCCGAGAGAAGTCGCTCTCTCTCGCCCTCCACATCCCTCTCGGCATTG  
+  
FFFFFFFFFFFFFFFFFFFFFF:FFFF:FFFF:FFFFFFFFFFFFFFFFFFFFFFFFFFFFFFFFFFFFFF:FFFF  
FFFFFFFFFFFFFFFFFFFFFFFFFFFFFFFFFFFFFFFFFFFFFFFFFFFFFFFFFFFFFFFFFFFFFF:FFFF:FFF:F  
@A00155:342:HHGFNDSXY:1:1255:21667:17409 2:N:0:GAACCTAG+TCCGCATA  
CACGGTAGGTCGTGAACAAGCCCGGAGTACATCTCCTTTGGAACCAGGAGACCCCTCCGGTCTTGTCC  
AACCTCTGTTTCGGCAGAGGATACCGTGCTCCACAGCTGTAAGGCTGTGGGCCCGAGAGAAGTCGCTC  
+  
FFFFFFFFFFFFFFFFFFFFFFFFFFFFFFFFFFFFFFFFFFFFFF:FFFFFFFFFFFFFFFFFFFFFF:FFFF  
FFFFFFFFFFFFFFFFFFFFFFFFFFFFFFFFFFFFFFFFFFFFFFFFFFFFFFFFFFFFFFFFFFFFFF:FFFFF,FFFFF  
@A00155:342:HHGFNDSXY:1:1255:20980:24643 2:N:0:GAACCTAG+TCCGCATA  
ACTTACACGGTAGGTCGTGAACAAGCCCGGAGTACATCTCCTTTGGAACCAGGAGACCCCTCCGGTCT  
TGTCCAACCTCTGTTTCGGCAGAGGATACCGTGCTCCACAGCTGTAAGGCTGTGGGCCCGAGAGAAGT  
+  
FFFFFFFFFFFFFFFFFFFFFFFFFFFFFFFFFFFFFF:F:F::FFFFFFFF:FFFFFFFF,FFFFFFFFFFFFFF:  
FFFFFFFFF:FFF,F,F:FFFFFFFFFFFFFF:FFFFFFFFFFFFFFFFFFFFFF,F:FFFFFFFFF:F::F:  
@A00155:342:HHGFNDSXY:1:1258:23421:11992 2:N:0:GAACCTAG+TCCGCATA  
CCGTTCCAAGGACGAAACCGTCGTTACTCTTCGAGTTGTGTAAGTTTCGTCCTAAAAAGGACTCGTCA  
GGTAGCCTACTAGACTACGACTTACACGGTAGGTCGTGAACAAGCCCGGAGTACATCTCCTTTGGAAC  
+  
FFFFFFFFFFFFFFFFFFFFFFFFFFFFFFFFFFFFFF:FFFF:FFFF:FFFFF:FFFFFFFFFFFFFFFF  
FFF:FFFF:FFFFFFFFFFFF:FFFFFFFFFFFF:FFFFFFFFFFFFFFFFFFFFFFFF:FFFFFFFFFFFF  
@A00155:342:HHGFNDSXY:1:1258:1958:29403 2:N:0:GAACCTAG+TCCGCATA  
CAGGTAGCCTACTAGACTACGACTTACACGGTAGGTCGTGAACAAGCCCGGAGTACATCTCCTTTGGA  
ACCAGGAGACCCCTCCGGTCTTGTCCAACCTCTGTTTCGGCAGAGGATACCGTGCTCCACAGCTGTAA  
+  
FFFFFFFFFFFFFFFFFFFFFFFFFFFFFFFFFFFFFFFFFFFFFFFFFFFFFFFFFFFFFFFFFFFFFFFF  
FFFFFFFFFFFFFFFFFFFFFFFFFFFFFFFFFFFFFFFFFFFFFFFFFFFFFFFFFFFFFFFFFFFFFFFF  
@A00155:342:HHGFNDSXY:1:1259:32678:15499 2:N:0:GAACCTAG+TCCGCATA  
CGGAGTACATCTCCTTTGGAAGTAGGAGACCCCTCCGGTCTTGTCCAACCTCTGTTTCGGCAGAGGAT  
ACCGTGCTCCACAGCTGTAAGGCTGTGGGCCCGAGAGAAGTCGCTCTCTCTCGCCCTCTACATCCCTC  
+

```


FFFFFFFFFFFFFFFFFFFFFFFFFFFFF:FFFFFFFFFFFFFFFFFFFFFFFFFFFFFFF:  
@A00155:342:HHGFNDSXY:1:1260:9118:30311 2:N:0:GAACCTAG+TCCGCATA  
GAACTAGGAGACCCTCCGGTCTTGTTCCAACCTCTGTTCGGCAGAGGATACCGTGCTCCACAGCTGT  
AAGGCTGTGGGCCCGAGAGAAGTCACTCTCTCTCGCCCTCCACATCCCTCTCGGCATTGAGATGAC  
  
+  
FFFFFFFFFFFFFFFFFFFFFFFFFFFFFFFFFFFFFFFFFFFFFFFFFFFFFFFFFFFFFFFFFFFFF  
FFFFFFFFFFFFFFFFFFFFFFFFFFFFFFFFFFFFFFFFFFFFFFFFFFFFFFFFFFFFFFFFFFFFF  
@A00155:342:HHGFNDSXY:1:1261:30924:7764 2:N:0:GAACCTAG+TCCGCATA  
ACGACTTACACGGTAGGTCGTGAACAAGCCCCGAGTACATCTCCTTTGGAAGTAAGGCTGTGGGCCCGAGAGA  
TCTTGTTCCAACCTCTGTTCGGCAGAGGATACCGTGCTCCACAGCTGTAAGGCTGTGGGCCCGAGAGA  
  
+  
FFFFFFFFFFFFFFFFFFF,FFFFFFFFFFFFFFFFFFFFFFFFFFFFF:FFFFFFFFFFFFFFFFFFFFFFFFFFFFF  
FFFFFFFFFFFFFFFFFF:F:FFFFFFFFFFFFFFFFFFFFFFFFFFFFFFFFFFFFFFFFFFFFFFFFFFFFF  
@A00155:342:HHGFNDSXY:1:1261:5421:14105 2:N:0:GAACCTAG+TCCGCATA  
CACGGTAGGTCGTGAACAAGCCCCGAGTACATCTCCTTTGGAAGTAAGGCTGTGGGCCCGAGAGAAGTCGCTC  
AACCTCTGTTCGGCAGAGGATACCGTGCTCCACAGCTGTAAGGCTGTGGGCCCGAGAGAAGTCGCTC  
  
+  
FFFFFFFFFFFFFFFFFFFFFFFF,F:FFFFFFFFFFFFFFFFFFFFFFFFFFFFFFFFFFFFFFFFFFFFFFFFFFFFF  
FFFFFFFFFFFFFFFFFF:F:FFFFFFFFFFFFFFFFFFFFFFFFFFFFFFFFFFFFFFFFFFFFFFFFFFFFF,  
@A00155:342:HHGFNDSXY:1:1261:15664:16000 2:N:0:GAACCTAG+TCCGCATA  
AAGGACGAAAACCGTCGTTACTCTTTGAGTTGTGTAAGTTTTCGTCCTAAAAAGGACTCGTCAGGTAGCC  
TACTAGACTACGACTTACACGGTAGGTCGTGAACAAGCCCCGAGTACATCTCCTTTGGAAGTAAGGAGAG  
  
+  
FFFFFFFFFFFFFFFFFFFFFFFF::FFFFFFFFFFFFFFFFFFFFFFFFFFFFFFFFFFFFFFFFFFFFFFFFFFFFF  
FFFFFFFFFFFFFFFFFFFFFFFFFFFFFFFFFFFFFFFFFFFFFFFFFFFFFFFFFFFFFFFFFFFFFFFFFFFFF  
@A00155:342:HHGFNDSXY:1:1261:6388:27430 2:N:0:GAACCTAG+TCCGCATA  
AAAAGGACTCGTCAGGTAGCCTACTAGACTACGACTTACACGGTAGGTCGTGAACAAGCCCCGAGTAC  
ATCTCCTTTGGAACCAGGAGACCCCTCCGGTCTTGTTCCAACCTCTGTTCGGCAGAGGATACCGTGCT  
  
+  
FFFFF:FFFFFFFFFFFFFFFFFFFFFFFFFFFFF:F,FFFFFFFFFFFFFFFFF:FFFFFFFFFFFFFFFFF:FFFFFFF  
FFFFFFFFFFFFFFFFF,FFFFFFFFFFFFFFFFFFFFFFFFFFFFFFFFFFFFFFFFFFFFFFFFFFFFFFFFFFFFF:  
@A00155:342:HHGFNDSXY:1:1261:32669:32863 2:N:0:GAACCTAG+TCCGCATA  
CGTCAGGTAGCCTACTAGACTACGACTTACACGGTAGGTCGTGAACAAGCCCCGAGTACATCTCCTTT  
GGAAGTAAGGAGACCCCTCCGGTCTTGTTCCAACCTCTGTTCGGCAGAGGATACCGTGCTCCACAG  
  
+  
FFFFFFFF:FFFFFFFFFFFFFFFFFFFFFFFFFFFFFFFFFFFFF:FFFFFFFFFFFFFFFFFFFFFFFFFFFFFFFFF  
FFFFFFFFFFFFFFFFFFFFFFFFFFFFFFFFFFFFFFFFFFFFFFFFFFFFFFFFFFFFFFFFFFFFFFFFFFFFF  
@A00155:342:HHGFNDSXY:1:1261:8594:34601 2:N:0:GAACCTAG+TCCGCATA  
GAAACCGTCGTTACTCTTCGAGTTGTGTAAGTTTTCGTCCTAAAAAGGACTCGTCAGGTAGCCTACTAG  
ACTACGACTTACACGGTAGGTCGTGAACAAGCCCCGAGTACATCTCCTTTGGAAGTAAGGAGACCCCTC  
  
+  
FFFFFFFFFFFFFFFFFFFFFFFFFFFFFFFFFFFFFFFFFFFFF:FFFFFFFFFFFFFFFFFFFFFFFFFFFFFFFFF  
FFFFFFFFFFFFFFFFFFFFFFFFFFFFFFFFFFFFFFFFFFFFFFFFFFFFFFFFFFFFFFFFFFFFFFFFFFFFF  
@A00155:342:HHGFNDSXY:1:1262:23999:12117 2:N:0:GAACCTAG+TCCGCATA  
AACTAGGAGACCCCTCCGGTCTTGTTCCAACCTCTGTTCGGCAGAGGATACCGTGCTCCACAGCTGTA  
AGGCTGTGGGCCCGAGAGAAGTCGCTCTCTCTCGCCCTCCACATCCCTCTCGGCATTGAGATGACCC  
  
+  
FFFFFFFFFFFFFFFFFFFFFFFFFFFFFFFFFFFFFFFFFFFFF:FFFFFFFFFFFFFFFFFFFFFFFFFFFFFFFFF  
FFFFFFFFFFFFFFFFFFFFFFFFFFFFFFFFFFFFFFFFFFFFFFFFFFFFFFFFFFFFFFFFFFFFFFFFFFFFF  
@A00155:342:HHGFNDSXY:1:1262:30671:32346 2:N:0:GAACCTAG+TCCGCATA  
GAGACCCCTCCGGTCTTGTTCCAACCTCTGTTCGGCAGAGGATACCGTGCTCCACAGCTGTAAGGCTG  
TGGGCCCGAGAGAAGTCGCTCTCTCTCGCCCTCCACATCCCTCTCGGCATTGAGATGACCATAGGCCA


```

FFFFFFFFFFFFFFFF:FFFFFFFFFFFFFFFFFFFFFFFFFFFFFFFFFFFFFFFFFFFFFFFFFFFFFFFFFFFFFFFF  
FFFFFFFFFFFFFFFF,FFFFFFFFFFFF:FFFFFFFFFFFFFFFFFFFFFFFFFFFFFFFFFFFFFFFFFFFFFFFFFFFFFFFF  
@A00155:342:HHGFNDSXY:1:1264:15872:7153 2:N:0:GAACCTAG+TCCGCATA  
GAGTACATCTCCTTTGGAAGTACGAGACCCCTCCGGTCTTGTCCAACCTCTGTTTCGGCAGAGGATAC  
CGTGCTCCACAGCTGTAAGGCTGTGGGCCCGAGAGAAGTCGCTCTCTCTCGCCCTCCAC  
+  
FFFFFFFFFFFFFFFFFFFFFFFFFFFFFFFFFFFFFFFFFFFFFFFFFFFFFFFFFFFFFFFFFFFFFFFFFFFFFFFF  
FFFFFFFFFFFFFFFFFFFFFFFFFFFFFFFFFFFFFFFFFFFFFFFFFFFFFFFFFFFFFFFFFFFFFFFFFFFFFFFF  
@A00155:342:HHGFNDSXY:1:1264:23249:22341 2:N:0:GAACCTAG+TCCGCATA  
GGACTCGTCAGGTAGCCTACTAGACTACGACTTACACGGTAGGTCTGAACAAGCCCGAGTACATCT  
CCTTTGGAACAGGAGACCCCTCCGGTCTTGTCCAACCTCTGTTTCGGCAGAGGATACCGTGCTCCAC  
+  
FFFFFFFFFFFFFFFFFFFFFFFFFFFFFFFFFFFFFFFFFFFFFFFFFFFFFFFFFFFFFFFFFFFFFFFFFFFFFFFF  
FFFFFFFF:FFFFFFFFFFFFFFFFFFFFFFFFFFFFFFFFFFFFFFFFFFFFFFFFFFFFFFFFFFFFFFFFFFFFFFFF  
@A00155:342:HHGFNDSXY:1:1264:9941:29293 2:N:0:GAACCTAG+TCCGCATA  
TGTCCACTTAAGGACTCACCTCTGGCCTATGGTCATCTCAATGCCGAGAGGGATGTGGAGGGCGAGAG  
AGAGCGACTTCTCTCGGGCCACAGCCTTACAGCTGTGGAGCACGGTATCCTCTGCCGAAACAGAGGT  
+  
FFFFFFFFFFFFFFFFFFFFFFFFFFFFFFFFFFFFFFFFFFFFFFFFFFFFFFFFFFFFFFFFFFFFFFFFFFFFFFFF  
FFFFFFFFFFFFFFFFFFFFFFFFFFFFFFFFFFFFFFFFFFFFFFFFFFFFFFFFFFFFFFFFFFFFFFFFFFFFFFFF:  
@A00155:342:HHGFNDSXY:1:1264:5367:36401 2:N:0:GAACCTAG+TCCGCATA  
CTCCTTTGGAAGTACGAGACCCCTCCGGTCTTGTCCAACCTCTGTTTCGGCAGAGGATACCGTGCTCC  
ACAGCTGTAAGGCTGTGGGCCCGAGAGAAGTCGCTCTCTCTCGCCCTCTACATCCCTCTCGGCATTGA  
+  
FFFFFFFFFFFFFFFFFFFFFFFFFFFFFFFFFFFFFFFFFFFFFFFFFFFFFFFFFFFFFFFFFFFFFFFFFFFFFFFF,FFF  
FFFFFFFFFFFFFFFFFFFFFFFFFFFFFFFFFFFFFFFFFFFFFFFFFFFFFFFFFFFFFFFFFFFFFFFFFFFFFFFF:  
@A00155:342:HHGFNDSXY:1:1265:16532:8234 2:N:0:GAACCTAG+TCCGCATA  
CTTGGAACGACTCATCAGGGAGCCTACTAGACTCCGACCGTCATGGGGGTCAAACCCATGCCCCGC  
TACACCGCCTTAGATCAGCTGTGTCCACTTAAGGACTCACCTCTGGCCTATGGTCATCTCAATGCCGA  
+  
FFFFFFFFFFFFFFFFFFFFFFFFFFFFFFFFFFFFFFFFFFFFFFFFFFFFFFFFFFFFFFFFFFFFFFFFFFFFFFFF  
FFFFF:FFFFFFFFFFFFFFFFFFFFFFFFFFFFFFFFFFFFFFFFFFFFFFFFFFFFFFFFFFFFFFFFFFFFFFFF  
@A00155:342:HHGFNDSXY:1:1265:3305:30827 2:N:0:GAACCTAG+TCCGCATA  
GGCAGAGGATACCGTGCTCCACAGCTGTAAGGCTGTGGGCCCGAGAGAAGTCGCTCTCTCTCGCCCTC  
CACATCCCTCTCGGCATTGAGATGACCATAGGCCAGAGGTGAGTCCTTAAGTGGACACAGCTGA  
+  
FFFFFFFFFFFFFFFFFFFFFFFFFFFFFFFFFFFFFFFFFFFFFFFFFFFFFFFFFFFFFFFFFFFFFFFFFFFFFFFF  
FFFFFFFFFFFFFFFFFFFFFFFFFFFFFFFFFFFFFFFFFFFFFFFFFFFFFFFFFFFFFFFFFFFFFFFFFFFFFFFF:  
@A00155:342:HHGFNDSXY:1:1266:16260:2597 2:N:0:GAACCTAG+TCCGCATA  
ACTTACACGGTAGGTCTGTGAACAAGCCCGAGTACATCTCCTTTGGAACAGGAGACCCCTCCGGTCT  
TGTCCAACCTCTGTTTCGGCAGAGGATACCGTGCTCCACAGCTGTAAGGCTGTGGGCCCGAGAGAAGT  
+  
FFFFFFFFFFFFFFFFFFFFFFFFFFFFFFFFFFFFFFFFFFFFFFFFFFFFFFFFFFFFFFFFFFFFFFFFFFFFFFFF,FFF  
FFFFFFFFFFFFFFFFFFFFFFFFFFFFFFFFFFFFFFFFFFFFFFFFFFFFFFFFFFFFFFFFFFFFFFFFFFFFFFFF,FFF  
@A00155:342:HHGFNDSXY:1:1266:16423:2973 2:N:0:GAACCTAG+TCCGCATA  
ACTTACACGGTAGGTCTGTGAACAAGCCCGAGTACATCTCCTTTGGAACAGGAGACCCCTCCGGTCT  
TGTCCAACCTCTGTTTCGGCAGAGGATACCGTGCTCCACAGCTGTAAGGCTGTGGGCCCGAGAGAAGT  
+  
FFFFFFFFFFFFFFFF,FFFFFFFFF:FFFFFFFFFFFFFFFFFFFFFFFFFFFFFFFFFFFFFFFFFFFFFFFFFFFFFFFF  
FFFFFFFFFFFF:FF:FFFFFFFFFFFF:FFFFFFFFFFFF:FFFF:FFFFFFFF:FFFFFFFFFFFFFFFFFFFF  
@A00155:342:HHGFNDSXY:1:1267:10465:9502 2:N:0:GAACCTAG+TCCGCATA  
AGCCTACTAGACTACGACTTACACGGTAGGTCTGTGAACAAGCCCGAGTACATCTCCTTTGGAAGTACG  
GAGACCCCTCCGGTCTTGTCCAACCTCTGTTTCGGCAGAGGATACCGTGCTCCACAGCTGTAAGGCTG  
+

+ FFFFFFFFFFFFFFFFFFFFFFFFFFFFFFFFFFFFFFFFFFFFFFFFFFFFFFFFFFFFFFFFFFFFFFFFFF  
 @A00155:342:HHGFNDSXY:1:1267:30572:30358 2:N:0:GAACCTAG+TCCGCATA  
 TAGGAGACCCCTCCGGTCTTGTTCAACCTCTGTTTCGGCAGAGGATACCGTGCTCCACAGCTGTAAGG  
 CTGTGGGCCCGAGAGAAGTCGCTCTCTCTCGCCCTCCACATCCCTCTCGGCATTGAGATGACCATAGG  
 +  
 FFFFFFFFFFFFFFFFFFFFFFFFFFFFFFFFFFFFFFFFFFFFFFFFFFFFFFFFFFFFFFFFFFFFFFFFFF  
 FFFFFFFFFFFFFFFFFFFFFFFFFFFFFFFFFFFFFFFFFFFFFFFFFFFFFFFFFFFFFFFFFFFFFF: FFFFFFFFFFFFFFFF  
 @A00155:342:HHGFNDSXY:1:1267:16197:35837 2:N:0:GAACCTAG+TCCGCATA  
 CGGTAGGTCGTGAACAAGCCCGGAGTACATCTCCTTTGGAAGTAGGAGACCCCTCCGGTCTTGTTCAAC  
 CCTCTGTTTCGGCAGAGGATACCGTGCTCCACAGCTGTAAGGCTGTGGGCCCGAGAGAAGTCGCTCTC  
 +  
 FFFFFFFFFFFFFFFFFFFFFFFFFFFFFFFFFFFFFFFFFFFFFFFFFFFFFFFFFFFFFFFFFFFFFF:F: FFFFFFFFFFFFFFFFFFFFFFFF, FFFFFFFFFFFF  
 F, FFFFFFFFFFFFFFFFFFFFFFFFFFFFFFFFFFFFFFFFFFFFFFFFFFFFFFFFFFFFFFFFFFFFF: , FFFFFFFFFFFF  
 @A00155:342:HHGFNDSXY:1:1268:11993:4413 2:N:0:GAACCTAG+TCCGCATA  
 AAGGACTCGTCAGGTAGCCTACTAGACTACGACTTACACGGTAGGTCTGTGAACAAGCCCGGAGTACAT  
 CTCCTTTGGAACCAGGAGACCCCTCCGGTCTTGTTCAACCTCTGTTTCGGCAGAGGATACCGTG  
 +  
 FFFFFFFFFFFFFFFFFFFFF, FFFFFFFFFFFFFFFFFFFFF: FFFFFFFFFFFFFFFFFFFFFFFFFFFFF: FFFFFFFFFFFFFFFF  
 FFFFFFFFFFFFFFFFFFFFFF: FFFFFFFFFFFFFFFFFFFFFFFFFFFFFFFFFFFFFFFFFFFFFF  
 @A00155:342:HHGFNDSXY:1:1268:13467:12540 2:N:0:GAACCTAG+TCCGCATA  
 GTTGTGTAAGTTTCGTCTAAAGGACTCGTCAGGTAGCCTACTAGACTACGACTTACACGGTAGGT  
 CGTGAACAAGCCCGGAGTACATCTCCTTTGGAACCAGGAGACCCCTCCGGTCTTGTTCAACCTCTGTT  
 +  
 FFFFFFFFFFFFFFFFFFFFFFFFFFFFF: FFFFFFFFFFFFFFFFFFFFFFFFFFFFFFFFFFFFFFFFFFFFFF  
 FFFFFFFFFFFFFFFFFFFFF: FFFFFFFFFFFFFFFFFFFFFFFFFFFFFFFFFFFFFFFFFFFFFF: FFFFFFFFFFFFFFFF  
 @A00155:342:HHGFNDSXY:1:1268:13024:18161 2:N:0:GAACCTAG+TCCGCATA  
 CTTACTAGACTACGACTTACACGGTAGGTCTGTGAACAAGCCCGGAGTACATCTCCTTTGGAAGTAGGA  
 GACCCCTCCGGTCTTGTTCAACCTCTGTTTCGGCAGAGGATACCGTGCTCCACAGCTGTAAGGCTGTG  
 +  
 FFFFFFFFFFFFFFFFFFFFFFFFFFFFFFFFFFFFFFFFFFFFFFFFFFFFFFFFFFFFFFFFFFFFFF  
 FFFFFFFFFFFFFFFFFFFFFFFFFFFFFFFFFFFFFFFFFFFFFF: FFFFFFFFFFFFFFFFFFFFF: FF: FF  
 @A00155:342:HHGFNDSXY:1:1268:5846:25989 2:N:0:GAACCTAG+TCCGCATA  
 TAGCCTACTAGACTACGACTTACACGGTAGGTCTGTGAACAAGCCCGGAGTACATCTCCTTTGGAAGT  
 GGAGACCCCTCCGGTCTTGTTCAACCTCTGTTTCGGCAGAGGATACCGTGCTCCACAGCTGTAAGGCT  
 +  
 FFFFFFFFFFFFFFFFFFFFFFFFFFFFFFFFFFFFFFFFFFFFFF: : FFFFFFFFFFFFFFFFFFFFFF: FFF  
 FFFFFFFFFFFFFFFFFFFFFF: FFFFFFFFFFFFFFFFFFFFFFFFFFFFFFFFFFFFFFFFFFFFFF  
 @A00155:342:HHGFNDSXY:1:1268:3414:36401 2:N:0:GAACCTAG+TCCGCATA  
 CGTCAGGTAGCCTACTAGACTACGACTTACACGGTAGGTCTGTGAACAAGCCCGGAGTACATCTCCTTT  
 GGAACCAGGAGACCCCTCCGGTCTTGTTCAACCTCTGTTTCGGCAGAGGATACCGTGCTCCACAGCTG  
 +  
 FFFFFFFFFFFFFFFFFFFFFFFFFFFFFFFFFFFFFFFFFFFFFF: FFFFFFFFFFFFFFFFFFFFFFFFFFFFFF  
 FFF, FFFFFFFFFFFFFFFFFFFFFFFFFFFFFFFFFFFFFFFFFFFFFF: FFFF: FFFFFFFFFFFFFFFF  
 @A00155:342:HHGFNDSXY:1:1269:8223:10629 2:N:0:GAACCTAG+TCCGCATA  
 GAGACCCCTCCGGTCTTGTTCAACCTCTGTTTCGGCAGAGGATACCGTGCTCCACAGCTGTAAGGCTG  
 TGGGCCCGAGAGAAGTCGCTCTCTCTCGCCCTCTACATCCCTCTCGGCATTGAGATGACCATAG  
 +  
 FFFFFFFFFFFFFFFFFFFFFFFFFFFFFFFFFFFFFFFFFFFFFF: FFFFFFFFFFFFFFFFFFFFFFFFFFFFFF  
 FFFFFFFFFFFFF: FFFFFFFFFFFFFFFFFFFFFFFFFFFFFFFFFFFFFF: FFFFFFFFFFFFFFFFFFFFF  
 @A00155:342:HHGFNDSXY:1:1269:9607:19727 2:N:0:GAACCTAG+TCCGCATA  
 GGTCTGTGAACAAGCCCGGAGTACATCTCCTTTGGAAGTAGGAGACCCCTCCGGTCTTGTTCAACCTCT  
 GTTTCGGCAGAGGATACCGTGCTCCACAGCTGTAAGGCTGTGGGCCCGAGAGAAGTCGCTCTCTCTCG  
 +

FFFFFFFFFFFFFFFFFFFFFFFFFFFFFFFFFFFFFFFFFFFFFFFFFFFFFFFFFFFFFFFFFFFFFFFF  
FFFFFFFFFFFFFFFFFFFFFFFFFFFFFFFFFFFFFFFFFFFFFFFFFFFFFFFFFFFFFFFFFFFFFFFF:FFFF:FFFFFFFF  
@A00155:342:HHGFNDSXY:1:1269:8594:22138 2:N:0:GAACCTAG+TCCGCATA  
GGTCGTGAACAAGCCCGAGTACATCTCCTTTGGAAGTAGGAGACCCCTCCGGTCTTGTCCAACCTCT  
GTTTCGGCAGAGGATACCGTGCTCCACAGCTGTAAGGCTGTGGGCCCGAGAGAAGTCGCTCTCTCTCG  
+  
FFFFFFFFFFFFFFFFFFFFFFFFFFFFFFFFFFFFFFFFFFFFFFFFFFFFFFFFFFFFFFFFFFFFFFFF,FFFFFFFFFFFFFFFFFFFFFFFF:FFFFFFFFFFFF  
FFFFFFFFFFFFFFFFFFFFFFFFFFFFFFFFFFFFFFFFFFFFFFFFFFFFFFFFFFFFFFFFFFFFFFFF:FFFFFFFFFFFFFFFFFFFFFFFFFFFFFFFFFFFFFFFFFFFFF  
@A00155:342:HHGFNDSXY:1:1269:31123:25175 2:N:0:GAACCTAG+TCCGCATA  
TTACACGGTAGGTCGTGAACAAGCCCGAGTACATCTCCTTTGGAAGTAGGAGACCCCTCCGGTCTTG  
TCCAACCTCTGTTTCGGCAGAGGATACCGTGCTCCACAGCTGTAAGGCTGTGGGCCCGAGAGAAGTCG  
+  
FFFFFFFFFFFFFFFFFFFFFFFFFFFFFFFFFFFFFFFFFFFFFFFFFFFFFFFFFFFFFFFFFFFFFFFF,FF  
FFFFFFFFFFFFFFFFFFFFFFFFFFFFFFFFFFFFFFFFFFFFFFFFFFFFFFFFFFFFFFFFFFFFFFFFFFFFF  
@A00155:342:HHGFNDSXY:1:1269:28004:32174 2:N:0:GAACCTAG+TCCGCATA  
ACCCCTCCGGTCTTGTCCAACCTCTGTTTCGGCAGAGGATACCGTGCTCCACAGCTGTAAGGCTGTGG  
GCCCGAGAGAAGTCGCTCTCTCTCGCCCTCCACATCCCTCTCGGCATTGAGATGACCATAGGCCAGAG  
+  
FFFFFFFFFFFFFFFFFFFFFFFFFFFFFFFFFFFFFFFFFFFFFFFFFFFFFFFFFFFFFFFFFFFFFFFF:FFFFFFF  
FFFFFFFFFFFFFFFFFFFFFFFFFFFFFFFFFFFFFFFFFFFFFFFFFFFFFFFFFFFFFFFFFFFFFFFF,FFFFFFFFFFFFFFFFFFFFFFFFFFFFF  
@A00155:342:HHGFNDSXY:1:1270:20735:4742 2:N:0:GAACCTAG+TCCGCATA  
TACGACTTACACGGTAGGTCGTGAACAAGCCCGAGTACATCTCCTTTGGAACCAGGAGACCCCTCCG  
GTCTTGTCCAACCTCTGTTTCGGCAGAGGATACCGTGCTCCACAGCTGTAAGGCTGTGGGCCCG  
+  
FFFFFFFFFFFFFFFFFFFFFFFFFFFFFFFFFFFFFFFFFFFFFFFFFFFFFFFFFFFFFFFFFFFFFFFFFFFFF  
FFFFFFFFFFFFFFFFFFFFFFFFFFFFFFFFFFFFFFFFFFFFFFFFFFFFFFFFFFFFFFFFFFFFFFFFFFFFF  
@A00155:342:HHGFNDSXY:1:1270:15555:10833 2:N:0:GAACCTAG+TCCGCATA  
GGGTTCAAACCCATGCCCCGCCACACCGCCTTAGATCAGCTGTGTCCACTTAAGGACTCACCTCTGGC  
CTATGGTCATCTCAATGCCGAGAGGGATGTGGAGGGCGAGAGAGAGCGACTTCTCTCGGGCCACAGC  
+  
FFFFFFFFFFFFFFFFFFFFFFFFFFFFFFFFFFFFFFFFFFFFFFFFFFFFFFFFFFFFFFFFFFFFFFFFFFFFF  
FF:FFFFFFFFFFFFFFFFFFFFFFFFFFFFFFFFFFFFFFFFFFFFFFFFFFFFFFFFFFFFFFFFFFFFFFFF  
@A00155:342:HHGFNDSXY:1:1270:9625:26459 2:N:0:GAACCTAG+TCCGCATA  
ACTTACACGGTAGGTCGTGAACAAGCCCGAGTACATCTCCTTTGGAAGTAGGAGACCCCTCCGGTCT  
TGTCCAACCTCTGTTTCGGCAGAGGATACCGTGCTCCACAGCTGTAAGGCTGTGGGCCCGAGAGAAGT  
+  
FFFFFFFFFFFFFFFFFFFFFFFFFFFFFFFFFFFFFFFFFFFFFFFFFFFFFFFFFFFFFFFFFFFFFFFFFFFFF  
FFFFFFFFFFFFFFFFFFFFFFFFFFFFFFFFFFFFFFFFFFFFFFFFFFFFFFFFFFFFFFFFFFFFFFFF:FF  
@A00155:342:HHGFNDSXY:1:1271:18430:2284 2:N:0:GAACCTAG+TCCGCATA  
GGAGCACGGTATCCTCTGCCGAAACAGAGGTTGGACAAGACCGGAGGGGTCTCCTAGTTCCAAAGGAG  
ATGTACTCCGGGCTTGTTACGACCTACCGTGTAAGTCGTAGTCTAGTAGGCTACCTGAC  
+  
FFFFFFFFFFFFFFFFFFFFFFFFFFFFFFFFFFFFFFFFFFFFFFFFFFFFFFFFFFFFFFFFFFFFFFFFFFFFF  
FFFFFFFFFFFFFFFFFFFFFFFFFFFFFFFFFFFFFFFFFFFFFFFFFFFFFFFFFFFFFFFFFFFFFFFFFFFFF  
@A00155:342:HHGFNDSXY:1:1271:20374:6339 2:N:0:GAACCTAG+TCCGCATA  
AGAGTTGTGTAAGTTTCGTCCTAAAAAGGACTCGTCAGGTAGCCTACTAGACTACGACTTACACGGTA  
GGTCGTGAACAAGCCCGAGTACATCTCCTTTGGAAGTAGGAGACCCCTCCGGTCTTGTCCAACCTCT  
+  
FFFFFFFFFFFFFFFFFFFFFFFFFFFFFFFFFFFFFFFFFFFFFFFFFFFFFFFFFFFFFFFFFFFFFFFFFFFFF  
FFFFFFFFFFFFFFFFFFFFFFFFFFFFFFFFFFFFFFFFFFFFFFFFFFFFFFFFFFFFFFFFFFFFFFFF,FFFFFFFFFFFFFFFF:FFFF:FFFFF  
@A00155:342:HHGFNDSXY:1:1271:21052:30499 2:N:0:GAACCTAG+TCCGCATA  
AGATCAGCTGTGTCCACTTAAGGACTCACCTCTGGCCTATGGTCATCTCAATGCCGAGAGGGATGTGA  
AGGGCGAGAGAGAGCGACTTCTCTCGGGCCACAGCCTTACAGCTGTGGAGCACGGTATCCTCTGCCG  
+

FFFFFFFFFFFFFFFFFFFFFFFFFFFFFFFFFFFFFFFFFFFFFFFFFFFFFFFFFFFFFFFFFFFFFFFF:FFFF  
,FFFFFFFFFFFFFFFFFFFFFFFFFFFFFFFFFFFFFFFFFFFFFFFFFFFFFFFFFFFFFFFFFFFFFFFF:FFFFFFFFFFFFFFFFFFFFFFFF  
@A00155:342:HHGFNDSXY:1:1271:14091:36542 2:N:0:GAACCTAG+TCCGCATA  
TACGACTTACACGGTAGGTCGTGAACAAGCCCGGAGTACATCTCCTTTGGAACCAGGAGACCCCTCCG  
GTCTTGTCCAACCTCTGTTTCGGCAGAGGATACCGTGCTCCACAGCTGTAAGGCTGTGGGCCCGAGAG  
+  
FFFFFFFFFFFFFFFFFFFFFFFFFFFFFFFFFFFFFFFFFFFFFFFFFFFFFFFFFFFFFFFFFFFFFFFF  
FFFFFFFFFFFFFFFFFFFFFFFFFFFFFFFFFFFFFFFFFFFFFFFFFFFFFFFFFFFFFFFFFFFFFFFF:FFFFFFFFFFFFFFFF  
@A00155:342:HHGFNDSXY:1:1272:8974:2440 2:N:0:GAACCTAG+TCCGCATA  
TAGGTCGTGAACAAGCCCGGAGTACATCTCCTTTGGAAGTAGGAGACCCCTCCGGTCTTGTCCAACCT  
CTGTTTCGGCAGAGGATACCGTGCTCCACAGCTGTAAGGCTGTGGGCCCGAGAGAAGTCGCTCTCTCT  
+  
FFFFFFFFFFFFFFFFFFFFFFFFFFFFFFFFFFFFFFFFFFFFFFFFFFFFFFFFFFFFFFFFFFFFFFFF  
FFFFFFFFFFFFFFFFFFFFFFFFFFFFFFFFFFFFFFFFFFFFFFFFFFFFFFFFFFFFFFFFFFFFFFFF  
@A00155:342:HHGFNDSXY:1:1272:8305:11397 2:N:0:GAACCTAG+TCCGCATA  
TACGACTTACACGGTAGGTCGTGAACAAGCCCGGAGTACATCTCCTTTGGAAGTAGGAGACCCCTCCG  
GTCTTGTCCAACCTCTGTTTCGGCAGAGGATACCGTGCTCCACAGCTGTAAGGCTGTGGGCCCG  
+  
FFFFFFFFFFFFFFFFFFFFFFFFFFFFFFFFFFFFFFFFFFFFFFFFFFFFFFFFFFFFFFFFFFFFFFFF  
FFFFF,FFFFFFFFFFFF:FFFFF:FFFFFFFFFFFFFFFFFFFFFFFFFFFFFFFFFFFFFFFF:FFFF  
@A00155:342:HHGFNDSXY:1:1272:20690:11553 2:N:0:GAACCTAG+TCCGCATA  
GCCCGGAGTACATCTCCTTTGGAAGTAGGAGACCCCTCCGGTCTTGTCCAACCTCTGTTTCGGCAGAG  
GATACCGTGCTCCACAGCTGTAAGGCTGTGGGCCCGAGAGAAGTCGCTCTCTCTCGCCCTCCACATCC  
+  
FFFFFFFFFFFFFFFFFFFFFFFFFFFFFFFFFFFFFFFFFFFFFFFFFFFFFFFFFFFFFFFFFFFFFFFF  
FFFFFFFFFFFFFFFFFFFFFFFFFFFFFFFFFFFFFFFFFFFFFFFFFFFFFFFFFFFFFFFFFFFFFFFF  
@A00155:342:HHGFNDSXY:1:1272:17381:18161 2:N:0:GAACCTAG+TCCGCATA  
TACTCTTCGAGTTGTGTAAGTTTCGTCCTAAAAAGGACTCGTCAGGTAGCCTACTAGACTACGACTTA  
CACGGTAGGTCGTGAACAAGCCCGGAGTACATCTCCTTTGGAAGTAGGAGACCCCTCCGGTCTTGTCC  
+  
FFFFFFFFFFFFFFFFFFFFFFFFFFFFFFFFFFFFFFFFFFFFFFFFFFFFFFFFFFFFFFFFFFFFFFFF  
FFFFFFFFFFFFFFFFFFFFFFFFFFFFFFFFFFFFFFFFFFFFFFFFFFFFFFFFFFFFFFFFFFFFFFFF  
@A00155:342:HHGFNDSXY:1:1272:16441:20729 2:N:0:GAACCTAG+TCCGCATA  
TAGGAGACCCCTCCGGTCTTGTCCAACCTCTGTTTCGGCAGAGGATACCGTGCTCCACAGCTGTAAGG  
CTGTGGGCCCGAGAGAAGTCGCTCTCTCTCGCCCTCCACATCCCTCTCGGCATTGAGATGACCATAGG  
+  
FFFFFFFFFFFFFFFFFFFFFFFFFFFFFFFFFFFFFFFFFFFFFFFFFFFFFFFFFFFFFFFFFFFFFFFF  
FFFFFFF,FFFFFFFFF,FFFFFFFFFFFFFFFFFFFFFFFFFFFFFFFFFFFFFFFFFFFFFFFF:FFFFFFFFFFFFFFFF  
@A00155:342:HHGFNDSXY:1:1272:12138:30405 2:N:0:GAACCTAG+TCCGCATA  
GAAACCGTCGTTACTCTTCGAGTTGTGTAAGTTTCGTCCTAAAAAGGACTCGTCAGGTAGCCTACTAG  
ACTACGACTTACACGGTAGGTCGTGAACAAGTCCGGAGTACATCTCCTTTGGAAGTAGGAGACCCCTC  
+  
FFFFFFFFFFFFFFFFFFFFFFFFFFFFFFFFFFFFFFFFFFFFFFFFFFFFFFFFFFFFFFFFFFFFFFFF  
FFFFFFFFFFFFFFFFFFFFFFFFFFFFFFFFFFFFFFFFFFFFFFFFFFFFFFFFFFFFFFFFFFFFFFFF  
@A00155:342:HHGFNDSXY:1:1272:10095:34820 2:N:0:GAACCTAG+TCCGCATA  
GTTGTGTAAGTTTCGTCCTAAAAAGGACTCGTCAGGTAGCCTACTAGACTACGACTTACACGGTAGGT  
CGTGAACAAGCCCGGAGTACATCTCCTTTGGAACCAGGAGACCCCTCCGGTCTTGTCCAACCTCTGTT  
+  
FFFFFFFFFFFFFFFFFFFFFFFFFFFFFFFFFFFFFFFFFFFFFFFFFFFFFFFFFFFFFFFFFFFFFFFF  
FFFFFFFFFFFFFFFFFFFFFFFFFFFFFFFFFFFFFFFFFFFFFFFFFFFFFFFFFFFFFFFFFFFFFFFF  
@A00155:342:HHGFNDSXY:1:1272:3369:34851 2:N:0:GAACCTAG+TCCGCATA  
GGTCGTGAACAAGCCCGGAGTACATCTCCTTTGGAAGTAGGAGACCCCTCCGGTCTTGTCCAACCTCT  
GTTTCGGCAGAGGATACCGTGCTCCACAGCTGTAAGGCTGTGGGCCCGAGAGAAGTCGCTCTCTCTCG  
+

FFFFFFFFFFFF,FFFF,FFFFFFFFFFFFFFFFFFFF,FF:FFFFFFFFFFFFFFFFFFFFFFFFFFFF:F  
FFFFFFFFFFFFFFFFFFFFFFFFFFFFFFFFFFFF,FFFFFFFFFFFFFFFFFFFFFFFFFFFFFFFFFFFFF  
@A00155:342:HHGFNDSXY:1:1272:29604:35164 2:N:0:GAACCTAG+TCCGCATA  
GTACATCTCCTTTGGAAGTACGAGACCCCTCCGGTCTTGTCCAACCTCTGTTTCGGCAGAGGATACCG  
TGCTCCACAGCTGTAAGGCTGTGGGCCCGAGAGAAGTCGCTCTCTCTCGCCCTCCACATCCCTCTCGG  
+  
FFFFFFFFFFFFFFFFFFFFFFFFFFFFFFFFFFFFFFFFFFFFFFFFFFFFFFFFFFFFFFFFFFFFF:FFFFFFF  
FFFFFFFFFFFFFFFFFFFFFFFFFFFFFFFFFFFFFFFFFFFFFFFFFFFFFFFFFFFFFFFFFFFFFFFFF  
@A00155:342:HHGFNDSXY:1:1273:10438:11804 2:N:0:GAACCTAG+TCCGCATA  
GGTAGGTCGTGAACAAGCCCGGAGTACATCTCCTTTGGAAGTACGAGACCCCTCCGGTCTTGTCCAAC  
CTCTGTTTCGGCAGAGGATACCGTGCTCCACAGCTGTAAGGCTGTGGGCCCGAGAGAAGTCGCTCTCT  
+  
FFFFFFFFFFFFFFFFFFFFFFFFFFFFFFFFFFFFFFFFFFFFFFFFFFFFFFFFFFFFFFFFFFFFFFFFF  
FFFFFFFFFFFFFFFFF:FFFFFFFFFFFFFFFFFFFFFFFFFFFFFFFFFFFF,FFFFFFFFFFFFFFFFFFFFF  
@A00155:342:HHGFNDSXY:1:1273:6036:14043 2:N:0:GAACCTAG+TCCGCATA  
ACCGCCTTAGATCAGCTGTGTCCACTTAAGGACTCACCTCTGGCCTATGGTCATCTCAATGCCGAGAG  
GGATGTGGAGGGCGAGAGAGAGCGACTTCTCTCGGGCCACAGCCTTACAGCTGTGGAGCACGGTATC  
+  
FFFFFFFFFFFFFFFFFFFFFFFFFFFFFFFFFFFFFFFFFFFFFFFFFFFFFFFFFFFFFFFFFFFFFFFFF  
FFF:FFFFFFFFFFFFFFFFFFFFFFFFFFFFFFFFFFFFFFFFFFFFFFFFFFFFFFFFFFFFFFFFFFFF:FFFFFFF  
@A00155:342:HHGFNDSXY:1:1273:31349:16579 2:N:0:GAACCTAG+TCCGCATA  
CAGGTAGCCTACTAGACTACGACTTACACGGTAGGTCGTGAACAAGCCCGGAGTACATCTCCTTTGGA  
ACTAGGAGACCCCTCCGGTCTTGTCCAACCTCTGTTTCGGCAGAGGATACCGTGCTCCACAGCTGTAA  
+  
FFFFFFFFFFFF:FFFFFFFFFFFFFFFFFFFFFFFFFFFFFFFFFFFFFFFFFFFFFFFFFFFFFFFFFFFFF  
FFFFFFFFFFFFFFF:FFFFFFFFFFFFFFFFFFFFFFFFFFFFFFFFFFFFFFFFFFFFFFFFFFFFFFFFFFFFF  
@A00155:342:HHGFNDSXY:1:1273:18548:23688 2:N:0:GAACCTAG+TCCGCATA  
TCTCCTTTGGAAGTACGAGACCCCTCCGGTCTTGTCCAACCTCTGTTTCGGCAGAGGATACCGTGCTC  
CACAGCTGTAAGGCTGTGGGCCCGAGAGAAGTCGCTCTCTCTCGCCCTCCACATCCCTCTCGGCATTG  
+  
FFFFFFFFFFFFFFFFFFFFFFFFFFFFFFFFFFFFF:,FFFFFFFFFFFFF:FFFFFFFFFFFFFFFFFFFFF  
FFFFFFFFFFFFFFFFFFFFFFFFFFFFFFFFFFFFFFFFFFFFFFFFFFFFFFFFFFFFFFFFFFFFF:FFFFFFFFFFFFFFFFFFFFF  
@A00155:342:HHGFNDSXY:1:1273:19407:25394 2:N:0:GAACCTAG+TCCGCATA  
GACTCGTCAGGTAGCCTACTAGACTACGACTTACACGGTAGGTCGTGAACAAGCCCGGAGTACATCTC  
CTTTGGAACCAGGAGACCCCTCCGGTCTTGTCCAACCTCTGTTTCGGCAGAGGATACCGTGCTCCACA  
+  
FFFFFFFFFFFFFFFFFFFFFFFFFFFFFFFFFFFFF:FFFFFFFFFFFFFFFFFFFFFFFFFFFFF:FFFF  
FFFFFFFFFFFFFFFFFFFFFFFFFFFFFFFFFFFFFFFFFFFFFFFFFFFFFFFFFFFFFFFFFFFFF:FFFFFFFFFFFFF  
@A00155:342:HHGFNDSXY:1:1273:9182:26349 2:N:0:GAACCTAG+TCCGCATA  
AAGGACTCGTCAGGTAGCCTACTAGACTACGACTTACACGGTAGGTCGTGAACAAGCTCGGAGTACAT  
CTCCTTTGGAAGTACGAGACCCCTCCGGTCTTGTCCAACCTCTGTTTCGGCAGAGGATACCGTGCTCC  
+  
FF:FFFF,,F,FF:FFF,FFFF,FFF:FFF,FFFF,FF:FFFFFFFF,FFF:FFFFFFFF,FFF  
F,FFFFF:FFFFFFFF:F,FFFF:FFF,FF:FF,FFFFFFFF:FFF,,F:FFF,FFFFFFFFFFFF:FF  
@A00155:342:HHGFNDSXY:1:1274:6008:23672 2:N:0:GAACCTAG+TCCGCATA  
TAGACTACGACTTACACGGTAGGTCGTGAACAAGCCCGGAGTACATCTCCTTTGGAAGTACGAGACCC  
CTCCGGTCTTGTCCAACCTCTGTTTCGGCAGAGGATACCGTGCTCCACAGCTGTAAGGCTGTGGGCC  
+  
FFFFFFFFFFFFFFFFFFFFFFFFFFFFFFFFFFFFFFFFFFFFFFFFFFFFFFFFFFFFFFFFFFFFFFFFF  
FFFFFFFFFFFFFFFFFFFFFFFFFFFFFFFFFFFFFFFFFFFFFFFFFFFFFFFFFFFFFFFFFFFFFFFFF  
@A00155:342:HHGFNDSXY:1:1275:24849:2378 2:N:0:GAACCTAG+TCCGCATA  
CCTCCGGTCTTGTCCAACCTCTGTTTCGGCAGAGGATACCGTGCTCCACAGCTGTAAGGCTGTGGGCC  
CGAGAGAAGTCGCTCTCTCTCGCCCTTCACATCCCTCTCGGCATTGAGATGACCATAGGCCAGAG  
+



FFFFFFFFFFFFFFFFFFFFFFFFFFFFFFFFFFFFFFFFFFFFFFFFFFFFFFFFFFFFFFFFFFFFFFFF  
FFFFFFFFFFFFFFFFFFFFFFFFFFFFFFFFFFFFFFFFFFFFFFFFFFFFFFFFFFFFFFFFFFFFFFFF:FFFFFFFFFFFFFFFFFFFFFFFF  
@A00155:342:HHGFNDSXY:1:1275:10809:7279 2:N:0:GAACCTAG+TCCGCATA  
TCAGGTAGCCTACTAGACTACGACTTACACGGTAGGTCGTGAACAAGCCCGGAGTACATCTCCTTTGG  
AACTAGGAGACCCCTCCGGTCTTGTCCAACCTCTGTTTCGGCAGAGGATACCGTGCTCCACAGCT  
+  
FFFFFFFFFFFFFFFFFFFFFFFFFFFFFFFFFFFFFFFFFFFFFFFFFFFFFFFFFFFFFFFFFFFFFFFF  
FFFFFFFFFFFFFFFFFFFFFFFFFFFFFFFFFFFFFFFFFFFFFFFFFFFFFFFFFFFFFFFFFFFFFFFF  
@A00155:342:HHGFNDSXY:1:1275:32190:27712 2:N:0:GAACCTAG+TCCGCATA  
ACTCGAAGAGTAACGACGGTTTCGTCTTGAACGGACTCATCAGGGAGCCTACTAGACTCCGACCGT  
CATGGGGGTTCAAACCCATGCCCCGCCACACCGCCTTAGATCAGCTGTGTCCACTTAAGGACTCACCT  
+  
FFFFFFFFF:FFFFFFFFFFFFFFFFFFFFFFFFFFFFFFFFFFFFFFFFFFFFFFFFFFFFFFFFFFFFF  
FFFFFFFFF:FFFFFFFFFFFFFFFFFFFFFFFFFFFFFFFFFFFFFFFFFFFFFFFFFFFFFFFFFFFFF  
@A00155:342:HHGFNDSXY:1:1276:25247:2566 2:N:0:GAACCTAG+TCCGCATA  
AAACTTACACAACCTCGAAGAGTAACGACGGTTTCGTCTTGAACGGACTCATCAGGGAGCCTACTAG  
ACTCCGACCGTCATGGGGGTTCAAACCCATGCCCCGCCACACCGCCTTAGATCAGCTGTGTCCACTTA  
+  
FFFFFFFFFFFFFFFFFFFFFFFFFFFFFFFFFFFFFFFFFFFFFFFFFFFFFFFFFFFFFFFFFFFFFFFF:  
FFFFFFF:FFFFFFFFFFFFFFFFFFFFFFFFFFFFFFFFFFFFFFFFFFFFFFFFFFFFFFFFFFFFF  
@A00155:342:HHGFNDSXY:1:1276:8594:14184 2:N:0:GAACCTAG+TCCGCATA  
GTTTCGTCTCTAAAAGGACTCGTCAGGTAGCCTACTAGACTACGACTTACACGGTAGGTCGTGAACAA  
GCCCGGAGTACATCTCCTTTGGAAGTACTAGGAGACCCCTCCGGTCTTGTCCAACCTCTGTTTCGGCAGAG  
+  
FFFFFFFFFFFFFFFFFFFFFFFFFFFFFFFFFFFFFFFFFFFFFFFFFFFFFFFFFFFFFFFFFFFFFFFF  
FFFFFFFFFFFFFFFFFFFFF:FFFFFFFFFFFFF:FFFFFFFFFFFFFFFFFFFFFFFFFFFFFFFFFFFFF  
@A00155:342:HHGFNDSXY:1:1276:4860:14512 2:N:0:GAACCTAG+TCCGCATA  
GTACATCTCCTTTGGAACAGGAGACCCCTCCGGTCTTGTCCAACCTCTGTTTCGGCAGAGGATACCG  
TGCTCCACAGCTGTAAGGCTGTGGGCCCGAGAGAAGTCGCTCTCTCTCGCCCTCCACATCCCTCTCGG  
+  
FFFFFFFFFFFFFFFFFFFFFFFFFFFFFFFFFFFFFFFFFFFFFFFFFFFFFFFFFFFFFFFFFFFFFFFF:FFFF  
FFFFFFFFFFFFF:FFFFFFFFFFFFFFFFFFFFF:FFFFFFFFFFFFFFFFFFFFFFFFFFFFF:FFFFFFFFFFFFF  
@A00155:342:HHGFNDSXY:1:1276:9435:14763 2:N:0:GAACCTAG+TCCGCATA  
GTTTCGTCTCTAAAAGGACTCGTCAGGTAGCCTACTAGACTACGACTTACACGGTAGGTCGTGAACAA  
GCCCGGAGTACATCTCCTTTGGAAGTACTAGGAGACCCCTCCGGTCTTGTCCAACCTCTGTTTCGGCAGAG  
+  
FFFFFFFFFFFFF:FFFFFFFFFFFFFFFFFFFFF:FFFFFFFFFFFFF:FFFFFFFFFFFFFFFFFFFFF  
FFFFFFF:FFFFFFFFFFFFFFFFFFFFF:FFFFFFFFFFFFFFFFFFFFFFFFFFFFFFFFFFFFF  
@A00155:342:HHGFNDSXY:1:1276:12301:21793 2:N:0:GAACCTAG+TCCGCATA  
ACTAGACTACGACTTACACGGTAGGTCGTGAACAAGCCCGGAGTACATCTCCTTTGGAACAGGAGAC  
CCCTCCGGTCTTGTCCAACCTCTGTTTCGGCAGAGGATACCGTGCTCCACAGCTGTAAGGCTGTGGGC  
+  
FFFFFFFFFFFFFFFFFFFFFFFFFFFFFFFFFFFFF:FFFFFFFFFFFFFFFFFFFFFFFFFFFFF:FFFFFFFFFFFFF:F  
FFFFFFFFFFFFFFFFFFFFFFFFFFFFFFFFFFFFFFFFFFFFFFFFFFFFFFFFFFFFFFFFFFFFF  
@A00155:342:HHGFNDSXY:1:1276:15438:27602 2:N:0:GAACCTAG+TCCGCATA  
TCTTGTCCAACCTCTGTTTCGGCAGAGGATACCGTGCTCCACAGCTGTAAGGCTGTGGGCCCGAGAGA  
AGTCGCTCTCTCTCGCCCTTACATCCCTCTCGGCATTGAGATGACCATAGGCCAGAGGTGAGTCCTT  
+  
FF:FFFFFFFFFFFFFFFFFFFFFFFFFFFFFFFFFFFFFFFFFFFFFFFFFFFFFFFFFFFFF:FFFFFFFFFFFFF  
FFFFFFFFFFFFF:FFFFFFFFFFFFFFFFFFFFF:FFFFFFFFFFFFFFFFFFFFFFFFFFFFF  
@A00155:342:HHGFNDSXY:1:1277:12138:2973 2:N:0:GAACCTAG+TCCGCATA  
AAGCCCGGAGTACATCTCCTTTGGAAGTACTAGGAGACCCCTCCGGTCTTGTCCAACCTCTGTTTCGGCAG  
AGGATACCGTGCTCCACAGCTGTAAGGCTGTGGGCCCGAGAGAAGTCGCTCTCTCTCGCCCTCTACAT  
+

FF:FFF::FFFFFFFFFFFF:FFFFFFFFFFFF:FFFFFFFFFFFF,FF:FFFFFFFFFFFFFFFFFF  
FFFFFFFF:FFFFFFFFFFFFFFFFFF:FFFF:F:FFFFFFFFFFFFFFFFFFF,FFF  
@A00155:342:HHGFNDSXY:1:1277:8974:4006 2:N:0:GAACCTAG+TCCGCATA  
AGGACGAACTTACACAACCTCGAAGAGTAACGACGGTTTCGTCCTTGGAACGGACTCATCAGGGAGCC  
TACTAGACTCCGACCGTCATGGGGGTTCAAACCCATGCCCCGCCACACCGCCTTAGATCAGCTGTGTC  
+  
FFFFFFFFFFFFFFFFFFFFFFFFFFFFFFFFFFFFFFFF:FFFFFFFF:FFFF:FFFFFFFFFFFF  
:FFFFFFFFFFFFFFFFFFFFFFFF:FFFFFFFFFFFFFFFFFFFFFFFFFFFFFFFF:FFFF:FFFF  
@A00155:342:HHGFNDSXY:1:1277:18855:35462 2:N:0:GAACCTAG+TCCGCATA  
TAAGTTTCGTCCTAAAAAGGACTCGTCAGGTAGCCTACTAGACTACGACTTACACGGTAGGTCGTGAA  
CAAGCCCGGAGTACATCTCCTTTGGAAGTAGGAGACCCCTCCGGTCTTGTCCAACCTCTGTTTCGGCA  
+  
:FFFFFFFFFFFF:FFFFFFFFFFFFFFFFFFFFFFFFFFFFFFFFFFFFFFFFFFFFFFFFFFFFFFFF  
FFFFFFFFFFFFFFFF:FFFFFFFFFFFF,FFFFFFFFFFFFFFFFFFFFFFFFFFFFFFFF:FFFFFFFF  
@A00155:342:HHGFNDSXY:1:1278:3649:6558 2:N:0:GAACCTAG+TCCGCATA  
GCCCCGCCACACCGCCTTAGATCAGCTGTGTCCACTTAAGGACTCACCTCTGGCCTATGGTCATCTCA  
ATGCCGAGAGGGATGTGGAGGGCGAGAGAGAGCGACTTCTCTCGGGCCCACAGCCTTACAGCTGTGGA  
+  
FFFFFFFFFFFFFFFFFFFFFFFFFFFFFFFFFFFFFFFFFFFFFFFFFFFFFFFFFFFFFFFFFFFF  
FFFFFFFFFFFFFFFF:FFFFFFFFFFFFFFFFFFFFFFFFFFFFFFFFFFFFFFFFFFFFFFFFFFFF  
@A00155:342:HHGFNDSXY:1:1278:12780:16579 2:N:0:GAACCTAG+TCCGCATA  
GGAGTACATCTCCTTTGGAAGTAGGAGACCCCTCCGGTCTTGTCCAACCTCTGTTTCGGCAGAGGATA  
CCGTGCTCCACAGCTGTAAGGCTGTGGGCCCGAGAGAAGTCGCTCTCTCTCGCCCTCCACATCCCTCT  
+  
FFF:F,FFFF:FF:FFFFFFFFFFFF,FFFFFFFFFFFFFFFF:FFFFFFFFFFFFFFFF:FFFF  
FFFFFFFF:FF::FFFFFFFF:FFFFFFFF:FF::FFFFFFFF:FFFFFFFFFFFFFFFF  
@A00155:342:HHGFNDSXY:1:1278:19397:36526 2:N:0:GAACCTAG+TCCGCATA  
GTAGCCTACTAGACTACGACTTACACGGTAGGTCGTGAACAAGCCCGGAGTACATCTCCTTTGGAAGT  
AGGAGACCCCTCCGGTCTTGTCCAACCTCTGTTTCGGCAGAGGATACCGTGCTCCACAGCTGTTAGGC  
+  
FFF:FFFFFFFFFFFFFFFFFFFFFFFF:FFFFFFFFFFFF:FFFFFFFFFFFFFFFFFFFFFFFF  
FFFFFFFFFFFFFFFFFFFFFFFFFFFFFFFFFFFFFFFFFFFFFFFFFFFFFFFFFFFFFFFFFFFF  
@A00155:342:HHGFNDSXY:1:1301:5285:11835 2:N:0:GAACCTAG+TCCGCATA  
GTTTCGTCCTAAAAAGGACTCGTCAGGTAGCCTACTAGACTACGACTTACACGGTAGGTCGTGAACAA  
GCCCGGAGTACATCTCCTTTGGAAGTAGGAGACCCCTCCGGTCTTGTCCAACCTCTGTTACGGC  
+  
FFFFFFFFFFFF:FFF:FFFFFF:FFFFFFFFFFFFFFFF,FFFFFFFFFFFFFFFFFFFFFFFFFFFF  
FFFFFFFFFFFFFFFFFFFFFFFFFFFFFFFFFFFFFFFFFFFFFFFFFFFFFFFFFFFFFFFFFFFF:FFFFFFFF:FFF  
@A00155:342:HHGFNDSXY:1:1301:5330:12038 2:N:0:GAACCTAG+TCCGCATA  
GTTTCGTCCTAAAAAGGACTCGTCAGGTAGCCTACTAGACTACGACTTACACGGTAGGTCGTGAACAA  
GCCCGGAGTACATCTCCTTTGGAAGTAGGAGACCCCTCCGGTCTTGTCCAACCTCTGTTACGGC  
+  
:FFFFFFFFFFFF,FFFFFFFFFFFFFFFFFFFFFFFFFFFFFFFF:FFFFFFFFFFFFFFFFFFFFFFFF:FFF  
:FFFFFFFFFFFFFFFFFFFF::FFFF:FFFF,FFFFFFFFFFFF:FFFFFFFFFFFFFFFF,FF  
@A00155:342:HHGFNDSXY:1:1301:11758:25300 2:N:0:GAACCTAG+TCCGCATA  
TCCAAGGACGAAACCGTCGTTACTCTTGAGTTGTGTAAGTTTCGTCCTAAAAAGGACTCGTCAGGTA  
GCCTACTAGACTACGACTTACACGGTAGGTCGTGAACAAGCCCGGAGTACATCTCCTTTGGAAGTAGG  
+  
FFFFFFFFFFFFFFFFFFFFFFFFFFFFFFFF:FFFFFFFFFFFF:FFFFFFFFFFFF,FFFFFFFFFFFF  
FFFFFFFFFFFFFFFFFFFF:FFFFFFFFFFFF:FFFF:FFFFFFFFFFFFFFFFFFFFFFFF:FFFFFFFF:F  
@A00155:342:HHGFNDSXY:1:1301:11632:25676 2:N:0:GAACCTAG+TCCGCATA  
TCCAAGGACGAAACCGTCGTTACTCTTGAGTTGTGTAAGTTTCGTCCTAAAAAGGACTCGTCAGGTA  
GCCTACTAGACTACGACTTACACGGTAGGTCGTGAACAAGCCCGGAGTACATCTCCTTTGGAAGTAGG  
+

FFFFFFFFFFFFFFFFFFFFFFFFFFFFFFFFFFFFFFFFFFFFFFFFFFFFFFFFFFFFFFFFFFFFFFFFF  
FFFFFFFFFFFFFFFFFFFFFFFFFFFFFFFFFFFFFFFFFFFFFFFFFFFFFFFFFFFFFFFFFFFFFFFFF  
@A00155:342:HHGFNDSXY:1:1301:25572:26835 2:N:0:GAACCTAG+TCCGCATA  
CCGTCGTACTCTTCGAGTTGTGTAAGTTTCGTCCTAAAAAGGACTCGTCAGGTAGCCTACTAGACTA  
CGACTTACACGGTAGGTCTGTAACAAGCCCCGGAGTACATCTCCTTTGGAAGTAGGAGACCCCTCCGGT  
+  
FFFFFFFFFFFFFFFFFFFFFFFFFFFFFFFFFFFFFFFFFFFFFFFFFFFFFFFFFFFFFFFFFFFFFFFFF  
FFFFFFFFFFFFFFFFFFFFFFFFFFFFFFFFFFFFFFFFFFFFFFFFFFFFFFFFFFFFFFFFFFFFFFFFF  
@A00155:342:HHGFNDSXY:1:1301:14181:35321 2:N:0:GAACCTAG+TCCGCATA  
GTCGTGAACAAGCCCCGGAGTACATCTCCTTTGGAAGTAGGAGACCCCTCCGGTCTTGTC AACCTCTG  
TTTCGGCAGAGGATACCGTGCTCCACAGCTGTAAGGCTGTGGGCCCGAGAGAAGTCGCTCT  
+  
FFFFFFFFFFFFFFFFFFFFFFFFFFFFFFFFFFFFFFFFFFFFFFFFFFFFFFFFFFFFFFFFFFFFFFFFF  
FFFFFFFFFFFFFFFFFFFFFFFFFFFFFFFFFFFFFFFFFFFFFFFFFFFFFFFFFFFFFFFFFFFFFFFFF  
@A00155:342:HHGFNDSXY:1:1302:30346:22106 2:N:0:GAACCTAG+TCCGCATA  
AAAAGGACTCGTCAGGTAGCCTACTAGACTACGACTTACACGGTAGGTCTGTAACAAGCCCCGGAGTAC  
ATCTCCTTTGGAAGTAGGAGACCCCTCCGGTCTTGTC AACCTCTGTTTCGGCAGAGGATACCGTGCT  
+  
FFFFFFFFFFFFFFFFFFFFFFFFFFFFFFFFFFFFFFFFFFFFFFFFFFFFFFFFFFFFFFFFFFFFFFFFF  
FFFFFFFFFFFFFFFFFFFFFFFFFFFFFFFFFFFFFFFFFFFFFFFFFFFFFFFFFFFFFFFFFFFFFFFFF  
@A00155:342:HHGFNDSXY:1:1303:8585:8437 2:N:0:GAACCTAG+TCCGCATA  
ACGGTAGGTCTGTAACAAGCCCCGGAGTACATCTCCTTTGGAAGTAGGAGACCCCTCCGGTCTTGTC CA  
ACCTCTGTTTCGGCAGAGGATACCGTGCTCCACAGCTGTAAGGCTGTGGGCCCGAGAGAAGTCGCTCT  
+  
FFFFFFFFFFFFFFFFFFFFFFFFFFFFFFFFFFFFFFFFFFFFFFFFFFFFFFFFFFFFFFFFFFFFFFFFF  
FFFFFFFFFFFFFFFFFFFFFFFFFFFFFFFFFFFFFFFFFFFFFFFFFFFFFFFFFFFFFFFFFFFFFFFFF  
@A00155:342:HHGFNDSXY:1:1303:3341:9752 2:N:0:GAACCTAG+TCCGCATA  
AGGACGAAACCGTCGTTACTCTTTGAGTTGTGTAAGTTTCGTCCTAAAAAGGACTCGTCAGGTAGCCT  
ACTAGACTACGACTTACACGGTAGGTCTGTAACAAGCCCCGGAGTACATCTCCTTTGGAAGTAGGAGAC  
+  
FFFFFFFFFFFF:F:FFFFFFFFFFFFFFFFFFFFFFFFFFFFFFFFFFFFFFFFFFFFFFFFFFFFFFF  
F:FFFFFFFF:F:FFFFFFFF:FFFFFFFF:FFFFFFFFFFFFFFFFFFFFFFFFFFFFFFFFFFFFF, FFFFFFFF  
@A00155:342:HHGFNDSXY:1:1303:20012:18364 2:N:0:GAACCTAG+TCCGCATA  
CCTACTAGACTACGACTTACACGGTAGGTCTGTAACAAGCCCCGGAGTACATCTCCTTTGGAAGTAGTA  
GACCCCTCCGGTCTTGTC AACCTCTGTTTCGGCAGAGGATACCGTGCTCCACAGCTGTAAGGCTGTG  
+  
FFFFFFFFFFFFFFFFFFFFFFFFFFFFFFFFFFFFFFFFFFFFFFFFFFFFFFFFFFFFFFFFFFFFFFFFF  
FFFFFFFFFFFFFFFFFFFFFFFFFFFFFFFFFFFFFFFFFFFFFFFFFFFFFFFFFFFFFFFFFFFFFFFFF  
@A00155:342:HHGFNDSXY:1:1304:2889:11443 2:N:0:GAACCTAG+TCCGCATA  
GTGAACAAGTCCGGAGTACATCTCCTTTGGAAGTAGGAGACCCCTCCGGTCTTGTC AACCTCTGTTT  
CGGCAGAGGATACCGTGCTCCACAGCTGTAAGGCTGTGGGCCCGAGAGAAGTCGCTCTCTCTCGCCCT  
+  
FFFFFFFFFFFFFFFFFFFFFFFFFFFFFFFFFFFFFFFFFFFFFFFFFFFFFFFFFFFFFFFFFFFFFFFFF  
FFFFFFFFFFFFFFFFFFFFFFFFFFFFFFFFFFFFFFFFFFFFFFFFFFFFFFFFFFFFFFFFFFFFFFFFF  
@A00155:342:HHGFNDSXY:1:1304:19452:36464 2:N:0:GAACCTAG+TCCGCATA  
ACCTCTGTTTCGGCAGAGGATACCGTGCTCCACAGCTGTAAGGCTGTGGGCCCGAGAGAAGTCGCTCT  
CTCTCGCCCTTACATCCCTCTCGGCATTGAGATGACCATAGGCCAGAGGTGAGTCCTTAAGTGGAC  
+  
FFFFFFF:FFFFFF:FFFFFFFFFFFFFFFFFFFFFFFFFFFFFFFFFFFFFFFFFFFFFFFFFFFFFFF  
FFFFFFFFFFFFFFFFFFFFFFFFFFFFFFFFFFFFFFFFFFFFFFFFFFFFFFFFFFFFFFFFFFFFFFFFF  
@A00155:342:HHGFNDSXY:1:1305:8684:13369 2:N:0:GAACCTAG+TCCGCATA  
CGGTAGGTCTGTAACAAGCCCCGGAGTACATCTCCTTTGGAACCAGGAGACCCCTCCGGTCTTGTC AA  
CCTCTGTTTCGGCAGAGGATACCGTGCTCCACAGCTGTAAGGCTGTGGGCCCGAGAGAAGTCGCTCTC  
+

```

+ FFFFFFFFFFFFFFFFFFFFFFFFFFFFFFFFFFFFFF:FFFFFFFFFFFFFFFFFFFFFFFFFFFFFF:FFFFFFFF
FFFFFFFFFFFFFFFFFFFFFFFFFFFFFFFFFFFFFFFFFFFFFFFFFFFFFFFFFFFFFFFFFFFFFFFFFFFFFFFF
@A00155:342:HHGFNDSXY:1:1305:8793:15342 2:N:0:GAACCTAG+TCCGCATA
TACACGGTAGGTCGTGAACAAGCCCGGAGTACATCTCCTTTGGAAGTAGGAGACCCCTCCGGTCTTG
CCAACCTCTGTTTCGGCAGAGGATACCGTGCTCCACAGCTGTAAGGCTGTGGGCCCGAGAGAAGTCGC
+
FFF,FFF:,FFFFFFFFFFFFFFFFFFFFFFFFFFFFFFFF:F:FFFFFFFFFFFFFFFFFFFFFFFF:FF:FF
FFFFFFFFFFFFFFFF,FFFFFF:F:FFFFFFFFFFFFFFFFFFFFFFFFFFFFFFFFFFFFFFFFFFFFFFFF,FFFF
@A00155:342:HHGFNDSXY:1:1305:16893:16783 2:N:0:GAACCTAG+TCCGCATA
ACTTACACGGTAGGTCGTGAACAAGCCCGGAGTACATCTCCTTTGGAAGTAGGAGACCCCTCCGGTCT
TGTC AACCTCTGTTTCGGCAGAGGATACCGTGCTCCACAGCTGTAAGGCTGTGGGCCCGAGAGAAG
+
FFFFFFFFFFFF,FF,FFFFFFFFFFFFFFFFFFFFFFFFFFFFFFFF:FFFFFFFFFFFFFFFFFFFFFFFFFFFFFF
FFFFFFFFFFFFFFFFFFFFFFFFFFFFFFFF,FFFFFFFFFFFFFFFFFFFFFFFFFFFFFFFF:FFFFFFFFFFFFFF
@A00155:342:HHGFNDSXY:1:1306:11379:4131 2:N:0:GAACCTAG+TCCGCATA
GAGTACATCTCCTTTGGAACCAGGAGACCCCTCCGGTCTTGTC AACCTCTGTTTCGGCAGAGGATAC
CGTGCTCCACAGCTGTAAGGCTGTGGGCCCGAGAGAAGTCGCTCTCTCTCGCCCTCCACATCCCTC
+
FFFFFFFFFFFF:FFFF:FFFF:FFFFFFFFFFFF:FFFFFFFFFFFF:FFFFF,FFFFFFFFFFFF
FFFFFFFFFFFFFFFFFFFFFFFF:FF:F:FFFFFFFFFFFFFFFF:FFFFFFFFFFFFFFFF:FFF:F:FFFFF
@A00155:342:HHGFNDSXY:1:1306:9001:4899 2:N:0:GAACCTAG+TCCGCATA
GGAGTACATCTCCTTTGGAACCAGGAGACCCCTCCGGTCTTGTC AACCTCTGTTTCGGCAGAGGATA
CCGTGCTCCACAGCTGTAAGGCTGTGGGCCCGAGAGAAGTCGCTCTCTCTCGCCCTCCACATCCCTCT
+
FFFFFFFFFFFFFFFFFFFFFFFFFFFFFFFFFFFFFFFFFFFFFFFFFFFFFFFFFFFFFFFFFFFFFFFFFFFFFF
FFFFFFFFFFFFFFFFFFFFFFFFFFFFFFFF:FFFFFFFFFFFFFF,FFFFFFFFFFFFFFFFFFFFFFFFFFFFFF
@A00155:342:HHGFNDSXY:1:1306:16938:6590 2:N:0:GAACCTAG+TCCGCATA
TGTGTAAGTTTTCGTCCTAAAAAGGACTCGTCAGGTAGCCTACTAGACTACGACTTACACGGTAGGTG
TGAACAAGCCCGGAGTACATCTCCTTTGGAAGTAGGAGACCCCTCCGGTCTTGTC AACCTCTGTTTC
+
FFFFFFFFFFFFFFFFFFFF,FFFFFFFFFFFFFFFFFFFFFFFFFFFFFFFFFFFFFFFFFFFFFFFFFFFFFFFFFFFF
FF:FFFFFFFFFFFFFFFFFFFFFFFFFFFFFFFFFFFFFFFFFFFFFFFFFFFFFFFFFFFFFFFFFFFFFFFF:FFFFF
@A00155:342:HHGFNDSXY:1:1306:2239:14575 2:N:0:GAACCTAG+TCCGCATA
TAGGTCGTGAACAAGCCCGGAGTACATCTCCTTTGGAACCAGGAGACCCCTCCGGTCTTGTC AACCT
CTGTTTCGGCAGAGGATACCGTGCTCCACAGCTGTAAGGCTGTGGGCCCGAGAGAAGTCGCTCTCTCT
+
FFFFFFFFFFFFFFFFFFFFFFFFFFFFFFFFFFFFFFFF:FFFFFFFFFFFFFFFFFFFFFFFFFFFFFFFFFFFFFF
FFFFFFFFFFFF:F,FFFF:FFFFFFFFFFFFFFFFFFFFFFFFFFFFFFFFFFFFFFFFFFFFFFFF: :FFFFFF
@A00155:342:HHGFNDSXY:1:1306:5177:17503 2:N:0:GAACCTAG+TCCGCATA
CGAAACTTACACA ACTCGAAGAGTAACGACGGTTTCGT CTTGGAACGGACTCATCAGGGAGCCTACT
AGACTCCGACCGTCATGGGGGTTCAAACCCATGCCCCGCCACATCGCCTTAGATCAGCT
+
FFFFFFFFFFFFFFFFFFFFFFFFFFFFFFFFFFFFFFFF:FFFFFFFFFFFFFFFFFFFFFFFFFFFFFFFF
FFFFFFFFFFFF:FFFFFFFFFFFFFFFFFFFFFFFFFFFFFFFFFFFFFFFFFFFFFFFFFFFFFFFFFFFF
@A00155:342:HHGFNDSXY:1:1306:5041:17550 2:N:0:GAACCTAG+TCCGCATA
CGAAACTTACACA ACTCGAAGAGTAACGACGGTTTCGT CTTGGAACGGACTCATCAGGGAGCCTACT
AGACTCCGACCGTCATGGGGGTTCAAACCCATGCCCCGCCACATCGCCTTAGATCAGCT
+
FFFFFFF:FFFFFFFFFFFFFFFFFFFFFFFFFFFFFFFFFFFFFFFFFFFFFFFFFFFFFFFFFFFFFFFFFFFFFF
FFFFFFFFFFFFFFFFFFFFFFFFFFFFFFFFFFFFFFFFFFFFFFFFFFFFFFFFFFFFFFFFFFFFFFFFF
@A00155:342:HHGFNDSXY:1:1306:4842:17832 2:N:0:GAACCTAG+TCCGCATA
CGAAACTTACACA ACTCGAAGAGTAACGACGGTTTCGT CTTGGAACGGACTCATCAGGGAGCCTACT
AGACTCCGACCGTCATGGGGGTTCAAACCCATGCCCCGCCACATCGCCTTAGATCAGCT
+

```

FFFF:FFFFFFFFFFFFFFFF:FFF:FFFFFFFF:FFFFFFFFFFFFFFFFFFFFFFFF,FFFFFFFFFFFFFFF  
:FFFFFFFFFFFFFFFFFFFFFFFFFFFFFFFF:FFFF:FFFFFFFFFFFFFFFF:FFFFF  
@A00155:342:HHGFNDSXY:1:1307:9308:29042 2:N:0:GAACCTAG+TCCGCATA  
CAGGTAGCCTACTAGACTACGACTTACACGGTAGGTCGTGAACAAGCCCGAGTACATCTCCTTTGGA  
ACTAGGAGACCCCTCCGGTCTTGTCCAACCTCTGTTTCGGCAGAGGATACCGTGCTCCACAGCTGTAA  
+  
FFFFFFFFFFFFFFFFFFFFFFFFFFFFFFFF:FFFFFFFFFFFFFFFFFFFFFFFFFFFFFFFF:FFF  
FFFF:FFFF:FFFFFFFFFFFFFFFF:FFF::FFFFFFFFFFFFFFFFFFFFFFFF,FFFFFFFFFFFFFFF  
@A00155:342:HHGFNDSXY:1:1307:5448:29371 2:N:0:GAACCTAG+TCCGCATA  
ACTAGACTACGACTTACACGGTAGGTCGTGAACAAGCCCGAGTACATCTCCTTTGGAAGTACAGGAGAC  
CCCTCCGGTCTTGTCCAACCTCTGTTTCGGCAGAGGATACCGTGCTCCACAGCTGTAAGGCTGTGGGC  
+  
FFFFFFFFFFFFFFF:FFFFFFFFFFFFFFFFFFFFFFFFFFFFFFFFFFFFFFFFFFFFFFFFFFFFFFFF  
FFFFFFFFFFFFFFFFFFFFFFFFFFFFFFFF:FFFFFFFFFFFFFFFFFFFFFFFFFFFFFFFF,F:FFFFFFFFFFFFF  
@A00155:342:HHGFNDSXY:1:1307:6325:34741 2:N:0:GAACCTAG+TCCGCATA  
ACTAGACTACGACTTACACGGTAGGTCGTGAACAAGCCCGAGTACATCTCCTTTGGAAGTACAGGAGAC  
CCCTCCGGTCTTGTCCAACCTCTGTTTCGGCAGAGGATACCGTGCTCCACAGCTGTAAGGCTGTGGGC  
+  
FFFFFFFFFFFFFFFFFFFFFFFFFFFFFFFF:FFFFFFFFFFFFFFFFFFFFFFFFFFFFFFFF:FFFFFFFFF  
FFFFFFFFFFFF:FFFFF:FFFFF,FFFFFFFFFFFFFFFFFFFFFFFFFFFFFFFFFFFFFFFFFFFFFFFF  
@A00155:342:HHGFNDSXY:1:1307:9155:35790 2:N:0:GAACCTAG+TCCGCATA  
CAGGTAGCCTACTAGACTACGACTTACACGGTAGGTCGTGAACAAGCCCGAGTACATCTCCTTTGGA  
ACTAGGAGACCCCTCCGGTCTTGTCCAACCTCTGTTTCGGCAGAGGATACCGTGCTCCACAGCTGTAA  
+  
FFFFFFF:FFFFFFFFFFFFFFFFFFFFFFFFFFFFFFFF:FFFFFFFFFFFFFFFFFFFFFFFFFFFFFFFF  
FFFFFFFFFFFFFFFFFFFFFFFFFFFFFFFFFFFFFFFFFFFFFFFFFFFFFFFFFFFFFFFFFFFFFFFFF:  
@A00155:342:HHGFNDSXY:1:1308:30770:7216 2:N:0:GAACCTAG+TCCGCATA  
GTAGCCTACTAGACTACGACTTACACGGTAGGTCGTGAACAAGCCCGAGTACATCTTCTTTGGAAGT  
AGGAGACCCCTCCGGTCTTGTCCAACCTCTGTTTCGGCAGAGGATACCGTGCTCCACAGCTGTAAGGC  
+  
FFFFFFFFFFFFFFFFFFFFFFFFFFFFFFFF:FFFFFFFFFFFFFFFFFFFFFFFFFFFFFFFFFFFFFFFF  
FFFFFFFFFFFFFFFFFFFFFFFFFFFFFFFFFFFFFFFFFFFFFFFFFFFFFFFFFFFFFFFFFFFFFFFF:FFFF  
@A00155:342:HHGFNDSXY:1:1308:17824:25880 2:N:0:GAACCTAG+TCCGCATA  
TCCTAAAAAGGACTCGTCAGGTAGCCTACTAGACTACGACTTACACGGTAGGTCGTGAACAAGCCCG  
AGTACATCTCCTTTGGAAGTACAGGAGACCCCTCCGGTCTTGTCCAACCTCTGTTTCGGCAGAGGATACC  
+  
FFFFFFFFFFFFFFFFFFFFFFFFFFFFFFFF:FFFFFFFFFFFFFFFFFFFFFFFFFFFFFFFFFFFFFFFF  
FFFFFFFFFFFFFFFFFFFFFFFFFFFFFFFF:FFFFFFFFFFFFFFFFFFFFFFFFFFFFFFFFFFFFFFFF  
@A00155:342:HHGFNDSXY:1:1309:19000:15702 2:N:0:GAACCTAG+TCCGCATA  
TACATCTCCTTTGGAAGTACAGGAGACCCCTCCGGTCTTGTCCAACCTCTGTTTCGGCAGAGGATACCGT  
GCTCCACAGCTGTAAGGCTGTGGGCCCGAGAGAAGTCGCTCTCTCTCGCCCTCCACATCCCTCTCGGC  
+  
FFFFFFFFFFFFF:FFFFFFFFF:FFFFFFFFFFFFFFFFFFFFFFFFFFFFFFFFFFFFFFFFFFFFFFFF  
FFFFFFFFFFFFFFFFFFFFFFFFFFFFFFFF:FFFFFFFFFFFFFFFFFFFFFFFFFFFFFFFFFFFFFFFF  
@A00155:342:HHGFNDSXY:1:1309:27317:20369 2:N:0:GAACCTAG+TCCGCATA  
CTAGGAGACCCCTCCGGTCTTGTCCAACCTCTGTTTCGGCAGAGGATACCGTGCTCCACAGCTGTAAG  
GCTGTGGGCCCGAGAGAAGTCGCTCTCTCTCGCCCTCTACATCCCTCTCGGCATTGAGATGACCATAG  
+  
FFFFFFFFFFFFFFFFFFFFFFFFFFFFFFFFFFFFFFFFFFFFFFFF,FFFFFFFFFFFF:FFFFFFFFFFFF:F  
:FFFFFFFFFFFFFFFFFFFFFFFFFFFFFFFFFFFFFFFFFFFFFFFFFFFFFFFFFFFFFFFF:FFFFFFFFFFFFF  
@A00155:342:HHGFNDSXY:1:1310:32000:13416 2:N:0:GAACCTAG+TCCGCATA  
AGTACATCTCCTTTGGAAGTACAGGAGACCCCTCCGGTCTTGTCCAACCTCTGTTTCGGCAGAGGATACC  
GTGCTCCACAGCTGTAAGGCTGTGGGCCCGAGAGAAGTCGCTCTCTCTCGCCCTCTACATCCCTCTCG  
+

FFFFF:FFFFFFFFF:FFFFFFFFFFFFFFFFF:FFFFFFFFF:FFFFFFF,FFF  
FFFFFFFFFFFFFFFFF,FFFFFFFFFFFF:FF,FFFFFFFFFFFFFFFFF:FFFFFFFFF  
@A00155:342:HHGFNDSXY:1:1310:20383:16658 2:N:0:GAACCTAG+TCCGCATA  
CGCCCTCCACATCCCTCTCGGCATTGAGATGACCATAGGCCAGAGGTGAGTCCTTAAGTGGACACAGC  
TGATCTAAGGCGGTGTGGTGGGGCATGGGTTTGAACCCCCATGACGGTCGGAGTCTAGTAGGCTCCCT  
+  
FFFFFFFFFFFFFFFFF:FFFFFFFFFFFFFFFFF:FFFFFFFFF  
FFFFFFFFFFFFFFFFF:FFFFFFFFF  
@A00155:342:HHGFNDSXY:1:1310:25183:18959 2:N:0:GAACCTAG+TCCGCATA  
GGATGTGGAGGGCGAGAGAGCGACTTCTCTCGGGCCACAGCCTTACAGCTGTGGAGCACGGTATC  
CTCTGCCGAAACAGAGGTTGGACAAGACCGGAGGGGTCTCCTAGTTCCAAAGGAGATGTACTCC  
+  
,,FF:,FFFFFFFFF:F:FF:FF:F::FFF:FFFFFFFFF,FFFFFFFF:FFFFFFFFF:  
FFFFFFFF, F:,FFFFFFFFF,FF::FFFFFFFF:FFFFFFFF::FFF::FFF  
@A00155:342:HHGFNDSXY:1:1310:9489:28385 2:N:0:GAACCTAG+TCCGCATA  
CACGGTAGGTCGTGAACAAGCCCGGAGTACATCTCCTTTGGAAGTACTAGGAGACCCCTCCGGTCTTGTCC  
AACCTCTGTTTCGGCAGAGGATACCGTGCTCCACAGCTGTAAGGCTGTGGGCCCGAGAGAAGTCGCTC  
+  
FFFFFFFFFFFFFFFFF:FFFFFFFFFFFFFFFFF:FFFFFFFFF  
FFFFFFFFFFFFFFFFF:FFFFFFFFF  
@A00155:342:HHGFNDSXY:1:1310:30671:28995 2:N:0:GAACCTAG+TCCGCATA  
CGTTCCAAGGACGAAACCGTCGTTACTCTACGAGTTGTGTAAGTTTCGTCCTAAAAAGGACTCGTCAG  
GTAGCCTACTAGACTACGACTTACACGGTAGGTCGTGAACAAGCCCGGAGTACATCTCCTTTGGAAC  
+  
FFFFFFFFFFFFFFFFF:FFFFFFFFFFFFFFFFF:FFFFFFFFF  
FFFFFFFFFFFFFFFFF:FFFFFFFFF,FFFFFFFF  
@A00155:342:HHGFNDSXY:1:1311:18005:1517 2:N:0:GAACCTAG+TCCGCATA  
AAAAGGACTCGTCAGGTAGCCTACTAGACTACGACTTACACGGTAGGTCGAGAACAAGCCCGGAGTAC  
ATCTCCTTTGGAAGTACTAGGAGACCCCTCCGGTCTTGTCCAACCTCTGTTTCGGCAGAGGATACCGTGCT  
+  
FFFFFFFFFFF:FFFFFFFFFFFFFFFFF:FFFFFFFFF,FFFFFFFFF  
FFFFFFFFFFF,FFFFFFFFFFF:FFFFFFFF:FFFFFFFF:FFF:FF,FFFFFFFF:FFFF  
@A00155:342:HHGFNDSXY:1:1311:7328:9142 2:N:0:GAACCTAG+TCCGCATA  
CCAAGGACGAAACCGTCGTTACTCTACGAGTTGTGTAAGTTTCGTCCTAAAAAGGACTCGTCAGGTAG  
CCTACTAGACTACGACTTACACGGTAGGTCGTGAACAAGCCCGGAGTACATCTCCTTTGGAAGTACTAGGA  
+  
FFFFFFFFFFFFFFFFF:FFFFFFFFFFFFFFFFF:FFFFFFFFF  
FFFFFFFFFFFFFFFFF:FFFFFFFFF:FFFFFFFF:FFFFFFFF:FFFFFFFFF:FFFFFFFFF  
@A00155:342:HHGFNDSXY:1:1311:26784:10426 2:N:0:GAACCTAG+TCCGCATA  
GTGTAAGTTTCGTCCTAAAAAGGACTCGTCAGGTAGCCTACTAGACTACGACTTACACGGTAGGTCGT  
GAACAAGCCCGGAGTACATCTCCTTTGGAAGTACTAGGAGACCCCTCCGGTCTTGTCCAACCTCTGTTTCG  
+  
FFFFFFFFFFFFFFFFF:FFFFFFFFFFFFFFFFF:FFFFFFFFF  
FFFFFFFFFFFFFFFFF:FFFFFFFF:FFFFF:FFFFF:FFFFFFFFF:FFFFFFFFF  
@A00155:342:HHGFNDSXY:1:1311:18412:29528 2:N:0:GAACCTAG+TCCGCATA  
CTGTGTCCACTTAAGGACTCACCTCTGGCCTATGGTCATCTCAATGCCGAGAGGGATGTAGAGGGCGA  
GAGAGAGCGACTTCTCTCGGGCCACAGCCTTACAGCTGTGGAGCACGGTATCCTCTGCCG  
+  
FFFFFFFFFFFFFFFFF:FFFFFFFFF  
FFFFFFFFFFFFFFFFF  
@A00155:342:HHGFNDSXY:1:1311:22959:31579 2:N:0:GAACCTAG+TCCGCATA  
GTAGCCTACTAGACTACGACTTACACGGTAGGTCGTGAACAAGCCCGGAGTACATCTCCTTTGGAACC  
AGGAGACCCCTCCGGTCTTGTCCAACCTCTGTTTCGGCAGAGGATACCGTGCTCCACAGCTGTAAGGC  
+

FFFFFFFFFFFFFFFFFFFFFFFFFFFFFFFFFFFFFFFFFFFFFFFFFFFFFFFFFFFFFFFFFFFFFFFF  
FFFFFFFF::FFFFFFFFFFFF,FFFFFFFFFFFFFFFFFFFFFFFFFFFFFFFFFFFFFFFFFFFFFFFF  
@A00155:342:HHGFNDSXY:1:1311:10022:32597 2:N:0:GAACCTAG+TCCGCATA  
GGAGTACATCTCCTTTGGAAGTACGAGACCCCTCCGGTCTTGTCCAACCTCTGTTTCGGCAGAGGATA  
CCGTGCTCCACAGCTGTAAGGCTGTGGGCCCCGAGAGAAGTCGCTCTCTCTCGCCCTCCACATCCCTCT  
+  
FFF:FFFFFFFF:F:FFFF,F:FFFFFFFF:F:FF:F,F:FFFFFFFF,FF,FFF::FFFF:FFFFFF  
FF:FFFFFFFF:FFFF:FFF:FFF:FFFFFFFFFFFF:,FFFFFFFFFFFF,FFFFFFFFFFFFFFFF  
@A00155:342:HHGFNDSXY:1:1311:25418:36182 2:N:0:GAACCTAG+TCCGCATA  
TTACACGGTAGGTCGTGAACAAGCCCGAGTACATCTCCTTTGGAAGTACGAGACCCCTCCGGTCTTG  
TCCAACCTCTGTTTCGGCAGAGGATACCGTGCTCCACAGCTGTAAGGCTGTGGGCCCCGAGAGAAGTCG  
+  
FFFFFFFFFFFF,FFFFFFFFFFFF:FFFFFFFFFFFFFFFFFFFFFFFFFFFFFFFF,FFFFFFFFFFFFFFFF  
:FFFFFFFFFFFF:FFFFFFFF,F:FFFFFFFFFFFFFFFFFFFF:FF:FFFFFFFFFFFF:FFF:,FFF  
@A00155:342:HHGFNDSXY:1:1312:14705:1720 2:N:0:GAACCTAG+TCCGCATA  
CTACTAGACTACGACTTACACGGTAGGTCGTGAACAAGCCCGAGTACATCTCCTTTGGAAGTACGAG  
ACCCCTCCGGTCTTGTCCAACCTCTGTTTCGGCAGAGGATACCGTGCTCCACAGCTGTAAGGCTGTGG  
+  
FFFFFFFFFFFFFFFFFFFFFFFFFFFFFFFFFFFFFFFFFFFFFFFFFFFFFFFFFFFFFFFFFFFFFFFF  
FFFFFFFFFFFFFFFFFFFFFFFFFFFFFFFFFFFFFFFFFFFFFFFFFFFFFFFFFFFFFFFFFFFFFFFF:FFFFFFFF  
@A00155:342:HHGFNDSXY:1:1312:3233:10629 2:N:0:GAACCTAG+TCCGCATA  
TCTCCTTTGGAAGTACGAGACCCCTCCGGTCTTGTCCAACCTCTGTTTCGGCAGAGGATACCGTGCTC  
CACAGCTGTAAGGCTGTGGGCCCCGAGAGAAGTCGCTCTCTCTCGCCCACCACATCCCTCTCGGCATTG  
+  
FFFFFFFF:FFFFFFFFFFFFFFFFFFFFFFFFFFFFFFFFFFFFFFFFFFFFFFFFFFFFFFFFFFFFFFFF  
FFFFFFFFFFFFFFFFFFFFFFFFFFFFFFFFFFFFFFFFFFFFFFFFFFFFFFFFFFFFFFFFFFFFFFFF,FFF:FFF,FFFFF:FFFF  
@A00155:342:HHGFNDSXY:1:1312:14769:30452 2:N:0:GAACCTAG+TCCGCATA  
GGACTCGTCAGGTAGCCTACTAGACTACGACTTACACGGTAGGTCGTGAACAAGCCCGAGTACATCT  
CCTTTGGAAGTACGAGACCCCTCCGGTCTTGTCCAACCTCTGTTTCGGCAGAGGATACCGTGCTCCAC  
+  
FFFFFFFFFFFFFFFFFFFFFFFFFFFFFFFFFFFFFFFFFFFFFFFFFFFFFFFFFFFFFFFFFFFFFFFF  
FFFFFFFFFFFFFFFFFFFFFFFFFFFFFFFFFFFFFFFFFFFFFFFFFFFFFFFFFFFFFFFFFFFFFFFF,FF:FFFFFFFFFFFFFFFFFFFF:FFFF,FFFF  
@A00155:342:HHGFNDSXY:1:1312:9579:36401 2:N:0:GAACCTAG+TCCGCATA  
AGTTTCGTCTCTAAAAAGGACTCGTCAGGTAGCCTACTAGACTACGACTTACACGGTAGGTCGTGAACA  
AGCCCGGAGTACATCTCCTTTGGAACAGGAGACCCCTCCGGTCTTGTCCAACCTCTGTTTCGGCAGA  
+  
F,,,FF:FFFF,FF::,FF::F,:FF:F,FF:F:FF,FFFFFFFF,FFFF,FF:F::F,,,FFFF  
F,:FFF:F:FF,F,FF:FFF:FFFF::,FF:FFFF:FFF,:FFFFFF:FFFFFF:FF:F,FFFF  
@A00155:342:HHGFNDSXY:1:1312:29414:36746 2:N:0:GAACCTAG+TCCGCATA  
CAGGTAGCCTACTAGACTACGACTTACACGGTAGGTCGTGAACAAGCCCGAGTACATCTCCTTTGGA  
ACTAGGAGACCCCTCCGGTCTTGTCCAACCTCTGTTTCGGCAGAGGATACCGTGCTCCACAGCTGTAA  
+  
FFFFFFFFFFFFFFFFFFFFFFFFFFFFFFFFFFFFFFFFFFFFFFFFFFFFFFFFFFFFFFFFFFFFFFFF  
FFFFFFFFFFFFFFFFFFFFFFFFFFFFFFFFFFFFFFFFFFFFFFFFFFFFFFFFFFFFFFFFFFFFFFFF  
@A00155:342:HHGFNDSXY:1:1313:19759:13009 2:N:0:GAACCTAG+TCCGCATA  
GGTCGTGAACAAGCCCGAGTACATCTCCTTTGGAAGTACGAGACCCCTCCGGTCTTGTCCAACCTCT  
GTTTCGGCAGAGGATACCGTGCTCCACAGCTGTAAGGCTGTGGGCCCCGAGAGAAGTCGCTCTCTCT  
+  
FFFFFFFFFFFFFFFFFFFFFFFFFFFFFFFFFFFFFFFFFFFFFFFFFFFFFFFFFFFFFFFFFFFFFFFF  
FFFFFFFFFFFFFFFFFFFF,FFFF:FFF:FFFFFF:F:FFFFFFFFFFFFFFFFFFFFFFFFFFFFFFFF  
@A00155:342:HHGFNDSXY:1:1313:9471:19304 2:N:0:GAACCTAG+TCCGCATA  
GACCCCTCCGGTCTTGTCCAACCTCTGTTTCGGCAGAGGATACCGTGCTCCACAGCTGTAAGGCTGTG  
GGCCCGAGAGAAGTCGCTCTCTCTCGCCCTCCACATCCCTCTCGGCATTGAGATGACCATAGGCCAGA  
+

```
FFFFFFFFFFFFFFFFFFFFFFFFFFFFFFFFFFFFFFFFFFFFFFFFFFFFFFFFFFFFF:,FFFFFFFFFFFFFFFFFFFFFF  
@A00155:342:HHGFNDSXY:1:1313:19018:19492 2:N:0:GAACCTAG+TCCGCATA  
CACGGTAGGTCGTGAACAAGCCCCGGAGTACATCTCCTTTGGAACCAGGAGACCCCTCCGGTCTTGTC  
AACCTCTGTTTCGGCAGAGGATACCGTGCTCCACAGCTGTAAGGCTGTGGGCCCGAGAGAAGTCGCTC  
+  
FFFFFF:FFFFFFFFFFFFFFFFFFFFFFFFFFFFFFFFFFFFFFFFFFFFFFFFFFFFFFFFFFFFFFFF  
FFFFFFFFFFFFFFFFFFFFFFFF:F:FFF:FFFFFFFFFFFFFFFFFFFFFFFFFFFFFFFF:FFFFFF  
@A00155:342:HHGFNDSXY:1:1313:6596:34585 2:N:0:GAACCTAG+TCCGCATA  
GTGAACAAGCCCCGGAGTACATCTCCTTTGGAAGTAGGAGACCCCTCCGGTCTTGTC AACCTCTGTT  
CGGCAGAGGATACCGTGCTCCACAGCTGTAAGGCTGTGGGCCCGAGAGAAGTCGCTCTCTCGCCCT  
+  
FFFFFFFFFFFFFF:FFFFFFFFFFFFFF:FFFFFFFFFFFFFFFFFFFFFFFFFFFFFFFFFFFFFFFF  
FFFFFFFFFFFFFFFFFFFFFFFFFFFFFFFFFFFFFFFFFFFFFFFFFFFFFFFFFFFFFFFFFFFFFF  
@A00155:342:HHGFNDSXY:1:1314:9308:4617 2:N:0:GAACCTAG+TCCGCATA  
AAACCGTCGTTACTCTTAGAGTTGTGTAAGTTTCGTCCTAAAAGGACTCGTCAGGTAGCCTACTAGA  
CTACGACTTACACGGTAGGTCGTGAACAAGCCCCGGAGTACATCTCCTTTGGAAGTAGGAGACCCCTC  
+  
FFFFFFFFFFFFFF:FF:FFFF:FFFFFFFFFFFFFFFFFFFFF,FFFFFFFFFFFF,FF:FFFFFF,F  
FFFF:FFFFFFFFFFFF,FF:FFFFFFFFFFFFFFFF:FF:FFF,FFFFFFFFFFFFFFFFFFFFFF  
@A00155:342:HHGFNDSXY:1:1314:10257:6261 2:N:0:GAACCTAG+TCCGCATA  
GAACTAGGAGACCCCTCCGGTCTTGTC AACCTCTGTTTCGGCAGAGGATACCGTGCTCCACAGCTGT  
AAGGCTGTGGGCCCGAGAGAAGTCGCTCTCTCTCGCCCTCCACATCCCTCTCGGCATTGAGATGACCA  
+  
FFFFFFFFFFFFFFFFFFFFFFFFFFFFFFFFFFFFFFFFFFFFFFFFFFFFFFFFFFFFFFFFFFFFFF  
FFFF:FFFFFFFFFFFFFF:FFFFFFFFFFFFFFFFFFFFFFFFFFFFFFFFFFFFFFFFFFFFFFFF  
@A00155:342:HHGFNDSXY:1:1314:4246:14638 2:N:0:GAACCTAG+TCCGCATA  
AAAAGGACTCGTCAGGTAGCCTACTAGACTACGACTTACACGGTAGGTCGTGAACAAGCCCCGGAGTAC  
ATCTCCTTTGGAAGTAGGAGACCCCTCCGGTCTTGTC AACCTCTGTTTCGGCAGAGGATACCGTGCT  
+  
FFFFFFFFFFFFFFFF:FFFFFFFFFFFFFFFFFFFFFFFFFFFFFFFFFFFFFFFFFFFFFFFFFFFFFF  
FFFFFFFFFFFFFFFFFFFFFFFFFFFFFFFFFFFFFFFFFFFFFFFFFFFFFFFFFFFFFFFFFFFFFF:  
@A00155:342:HHGFNDSXY:1:1315:2871:6089 2:N:0:GAACCTAG+TCCGCATA  
AAAAGGACTCGTCAGGTAGCCTACTAGACTACGACTTACACGGTAGGTCGTGAACAAGCCCCGGAGTAC  
ATCTCCTTTGGAAGTAGGAGACCCCTCCGGTCTTGTC AACCTCTGTTTCGGCAGAGGATACCGTGCT  
+  
FFF:FFFFFFF:FFFF:FFFF:FFFF:FFFFFFFFFFFFFFFFFFFF:FFFFFFF,FFFFFFFF  
FFFF:FFFFFFFFFFFFFFFFFFFFFFFFFFFFFFFFFFFFFFFF:FFFFFFF:FFFFFFFFFFFFFF:  
@A00155:342:HHGFNDSXY:1:1315:11143:12211 2:N:0:GAACCTAG+TCCGCATA  
CAAGGACGAAACCGTCGTTACTCTTCGAGTTGTGTAAGTTTCGTCCTAAAAGGACTCGTCAGGTAGC  
CTACTAGACTACGACTTACACGGTAGGTCGTGAACAAGCCCCGGAGTACATCTCCTTTGGAAGTAGGA  
+  
FFFFFFFFFFFFFFFF:FFFFFFFFFFFFFF:FFF:FFFFFFFFFFFFFF::FFFFFFFFFFFFFFFF,FFFF  
FFFFFFFFFFFFFFFFFFFFFFFF,FFFFFFFFFFFFFF:FFFFFFFFFFFFFF,FFFFFFF,FFFF  
@A00155:342:HHGFNDSXY:1:1315:19524:15045 2:N:0:GAACCTAG+TCCGCATA  
TCCAAGGACGAAACCGTCGTTACTCTTCGAGTTGTGTAAGTTTCGTCCTAAAAGGACTCGTCAGGTA  
GCCTACTAGACTACGACTTACACGGTAGGTCGTGAACAAGCCCCGGAGTACATCTCCTTTGGAACCAGG  
+  
FFFFFFFFFFFFFFFFFFFFFFFFFFFFFFFFFFFFFFFFFFFFFFFFFFFFF:,FFFFFFFFFFFFFFFFFFFFFF  
FFFFFFFFFFFFFFFFFFFFFFFF:FFFFFFFFFFFFFFFFFFFFFFFFFFFFFFFFFFFFFF:FFFFF  
@A00155:342:HHGFNDSXY:1:1315:18285:26334 2:N:0:GAACCTAG+TCCGCATA  
TACGACTTACACGGTAGGTCGTGAACAAGCCCCGGAGTACATCTCCTTTGGAAGTAGGAGACCCCTCCG  
GTCTTGTC AACCTCTGTTTCGGCAGAGGATACCGTGCTCCACAGCTGTAAGGCTGTGGGCCCGAGAG
```



FFFFFFFFFFFFFFFFFFFF, FFFFFFFFFFFFFFFFFFFFFFFFFFFFFFFFFF: FFFFFFFFFFFFFFFFFFFFFFFFFF  
FFFFFFFFFFFFFFFFFFFFFFFF: FFFFFFFFFF: FFFFFFFFFFFFFFFFFFFFFFFFFF: FFFFFFFF  
@A00155:342:HHGFNDSXY:1:1315:23900:27790 2:N:0:GAACCTAG+TCCGCATA  
AAAAGGACTCGTCAGGTAGCCTACTAGACTACGACTTACACGGTAGGTCGTGAACAAGCCCGGAGTAC  
ATCTCCTTTGGAAGTAGGAGACCCCTCCGGTCTTGTC AACCTCTGTTTCGGCAGAGGATACCGTGCT  
+  
FFFFFFFF: FFFFFFFFFFFFFFFFFF: FFFFFFFFFFFFFFFFFF: FFFF: FFFFFFFFFFFFFFFFFF  
FFFFFFFFFFFFFFFFFFFFFFFFFFFFFFFFFFFFFFFFFFFFFFFFFFFF, FFFFFFFF, FFFFFFFFFFFFFFFF  
@A00155:342:HHGFNDSXY:1:1316:30418:2942 2:N:0:GAACCTAG+TCCGCATA  
GCTCTTCGAGTTGTGTAAGTTTTCGTCCTAAAAAGGACTCGTCAGGTAGCCTACTAGACTACGACTTAC  
ACGGTAGGTCGTGAACAAGCCCGGAGTACATCTCCTTTGGAAGTAGGAGACCCCTCCGGTCTTGTC A  
+  
FFF: FFFFFFFFFFFFFFFFFF: F: FFFFFFFFFFFFFFFFFF: FFFFFFFFFFFFFFFFFF  
FFFFF, FFFFFFFFFF: FFFF: FFFF: FFFFFFFFFFFFFFFFFF: FFF: FFFFFFFFFFFFFFFF  
@A00155:342:HHGFNDSXY:1:1316:6759:35336 2:N:0:GAACCTAG+TCCGCATA  
AAAAGGACTCGTCAGGTAGCCTACTAGACTACGACTTACACGGTAGGTCGTGAACAAGCCCGGAGTAC  
ATCTCCTTTGGAAGTAGGAGACCCCTCCGGTCTTGTC AACCTCTGTTTCGGCAGAGGATACCGTGCT  
+  
FFF: FFFFFFFFFFFFFFFFFF: FFFFFFFFFFFFFFFFFF: FFFFFFFFFFFFFFFFFF: FFFFFFFFFFFFFFFF  
FFFFFFFFFFFFFFFFFFFFFFFFFFFFFFFFFFFFFFFFFFFFFFFFFFFF: FF: FFFF: FFF  
@A00155:342:HHGFNDSXY:1:1317:17101:2550 2:N:0:GAACCTAG+TCCGCATA  
AAGGACTCGTCAGGTAGCCTACTAGACGACGACTTACACGGTAGGTCGTGAACAAGCCCGGAGTACAT  
CTCCTTTGGAAGTAGGAGACCCCTCCGGTCTTGTC AACCTCTGTTTCGGCAGAGGATACCGTG  
+  
FFFFFFFFFFFFFFFFFFFFFFFF, FFFFFFFFFFFFFFFFFF: FFFFFFFFFFFFFFFF  
FFFFFFFFFFFFFFFFFFFFFFFF: FFFFFFFFFFFFFFFFFF: FFFFFFFFFFFFFFFF  
@A00155:342:HHGFNDSXY:1:1317:29369:10645 2:N:0:GAACCTAG+TCCGCATA  
CATCTCCTTTGGAACCAGGAGACCCCTCCGGTCTTGTC AACCTCTGTTTCGGCAGAGGATACCGTGC  
TCCACAGCTGTAAGGCTGTGGGCCCGAGAGAAGTCGCTCTCTCTCGCCCTCCACATCCCTCTCGGCAT  
+  
FFFFFFFFFFFFFFFFFFFFFFFF, FFFFFFFFFFFFFFFFFF: FFFFFFFFFFFFFFFF, F  
@A00155:342:HHGFNDSXY:1:1317:8983:14606 2:N:0:GAACCTAG+TCCGCATA  
GTTTCGTCCTAAAAAGGACTCGTCAGGTAGCCTACTAGACTACGACTTACACGGTAGGTCGTGAACAA  
GCCCGAAGTACATCTCCTTTGGAAGTAGGAGACCCCTCCGGTCTTGTC AACCTCTGTTTCGGCAGAG  
+  
FFFFFFFFFFFF: FFFF: FFFFFFFFFFFFFFFFFF: FFFFFFFFFFFFFFFFFF: FFFFFFFFFFFFFFFF  
FFFFFFFFFFFFFFFFFFFF: FFFFFFFFFFFFFFFFFF: FFFFFFFFFFFFFFFF: FFFFFFFFFFFFFFFF  
@A00155:342:HHGFNDSXY:1:1317:10456:36918 2:N:0:GAACCTAG+TCCGCATA  
TACTAGACTACGACTTACACGGTAGGTCGTGAACAAGCCCGGAGTACATCTCCTTTGGAAGTAGGAGA  
CCCCTCCGGTCTTGTC AACCTCTGTTTCGGCAGAGGATACCGTGCTCCACAGCTGTAAGGCTGTGGG  
+  
FFFFFFFFFFFFFFFFFFFFFFFF, FFFFFFFFFFFFFFFF: FFFFFFFFFFFFFFFF: FFFFFFFFFFFFFFFF  
FFFFFFFFFFFFFFFFFFFF: FFFFFFFFFFFFFFFFFF: FFFFFFFFFFFFFFFF: FFFFFFFFFFFFFFFF  
@A00155:342:HHGFNDSXY:1:1319:21197:3349 2:N:0:GAACCTAG+TCCGCATA  
GAAACCGTCGTTACTCTTCGAGTTGTGTAAGTTTCGTCCTAAAAAGGACTCGTCAGGTAGCCTACTAG  
ACTACGACTTACACGGTAGGTCGTGAACAAGCCCGGAGTACATCTCCTTTGGAAGTAGGAGACCCCTC  
+  
FFFFFFFFFFFFFFFFFFFFFFFF: FFFFFFFFFFFFFFFF: FFFFFFFFFFFFFFFF: FFFFFFFFFFFFFFFF  
FFFFFFFFFFFFFFFFFFFF: FFFFFFFFFFFFFFFFFF: FFFFFFFFFFFFFFFF: FFFFFFFFFFFFFFFF  
@A00155:342:HHGFNDSXY:1:1319:12807:8140 2:N:0:GAACCTAG+TCCGCATA  
ACTTACACGGTAGGTCGTGAACAAGCCCGGAGTACATCTCCTTTGGAAGTAGGAGACCCCTCCGGTCT  
TGTC AACCTCTGTTTCGGCAGAGGATACCGTGCTCCACAGCTGTAAGGCTGTGGGCCCGAGAGAAGT  
+

```
FFFFFFFFFFFFFFFFFFFFFFFFFFFFFFFFFFFFFFFFFFFFFFFFFFFFFFFFFFFFFFFFFFFFFFFFFFFFF  
FFFFFFFFFFFFFFFFFFFFFF::FFFFFFFFFFFFFFFFFFFFFFFFFFFFFFFFFFFFFFFF,FFFF:FFFFFFFFFFFFFFFFFFFF,FF  
@A00155:342:HHGFNDSXY:1:1320:17734:17769 2:N:0:GAACCTAG+TCCGCATA  
GTGAACAAGCCCCGGAGTAGCATCTCCTTTGAACTAGGAGACCCTCGGTCTTGTC AACCTCTGTTT  
CGGCAGAGGATACCGTGCTCCACAGCTGTAAGGCTGTGGGCCCGAGAGAAGTCGCTCTCTCTCGCC  
+  
FFFFFFFFFFFFFFFFFFFFFFFFFFFFFFFFFFFFFFFFFFFFFFFFFFFFFFFFFFFFFFFFFFFFFFFF:F  
FFFFFFFFFFFFFFFFFFFFFFFFFFFFFFFFFFFFFFFFFFFFFFFFFFFFFFFFFFFFFFFFFFFFFFFF:F  
@A00155:342:HHGFNDSXY:1:1320:5023:18208 2:N:0:GAACCTAG+TCCGCATA  
AAGGACTCGTCAGGTAGCCTACTAGACTACGACTTACACGGTAGGTCGTGAACAAGCCCCGGAGTAGCAT  
CTCCTTTGAACTAGGAGACCCTCGGTCTTGTC AACCTCTGTTTCGGCAGAGGATACCGTG  
+  
FFFFFFFFFFFFFFFFFFFFFFFFFFFFFFFFFFFFFFFFFFFFFFFFFFFFFFFFFFFFFFFFFFFFFFFF:  
FFFF:FFFF:FFFFFFFFFFFFFFFFFFFFFFFFFFFFFFFFFFFFFFFFFFFFFFFFFFFFFFFF:FFFF  
@A00155:342:HHGFNDSXY:1:1320:31259:20525 2:N:0:GAACCTAG+TCCGCATA  
CTGGCCTATGGTCATCTCAATGCCGAGAGGGATGTAGAGGGCGAGAGAGAGCGACTTCTCTCGGGCCC  
ACAGCCTTACAGCTGTGGAGCACGGTATCCTCTGCCGAAACAGAGTTGGACAAGACCGGAGGGGTCT  
+  
F:FFFFFFFFFFFFFFFFFFFFFFFFFFFFFFFFFFFFFFFF,F:FFFFFFFF:FFFFFFFFFFFFFFFFFFFFF  
FFFFFFFFFFFFFFFF,FFFFFFFFF:F,FFFF:FFFF:FFFF:FFFFFFFFFFFF:FFFFFFFF:FFFF  
@A00155:342:HHGFNDSXY:1:1320:17282:21778 2:N:0:GAACCTAG+TCCGCATA  
TACTCTTCGAGTTGTGTAAGTTTCGTCCTAAAAAGGACTCGTCAGGTAGCCTACTAGACTACGACTTA  
CACGGTAGGTCGTGAACAAGCCCCGGAGTAGCATCTCCTTTGAAACCAGGAGACCCTCGGTCTTGTC  
+  
FFFF::FF:FFFFFFFFFFFFFFFFFFFFFFFFFFFFFFFFFFFFFFFFFFFFFFFFFFFFFFFFFFFFF  
FFFFFFFFFFFFFFFFFFFFFFFFFFFFFFFFFFFFFFFFFFFFFFFFFFFFFFFFFFFF,FFFFFFF:FFFFFFF:FFFFFFF  
@A00155:342:HHGFNDSXY:1:1320:23032:23437 2:N:0:GAACCTAG+TCCGCATA  
GACTCGTCAGGTAGCCTACTAGACTACGACTTACACGGTAGGTCGTGAACAAGCCCCGGAGTAGCATCTC  
CTTAGGA ACTAGGAGACCCTCGGTCTTGTC AACCTCTGTTTCGGCAGAGGATACCGTGCTCCACA  
+  
FFFFFFFFFFFFFFFFFFFFFFFFFFFFFFFFFFFFFFFFFFFFFFFFFFFFFFFFFFFFFFFFFFFFFFFF:  
FFFF:FFFFFFFFFFFF,FFFFFFFFFFFFFFFFFFFFFFFFFFFFFFFFFFFFFFFFFFFFFFFFFF  
FFFF::FFFFFFFF:FFFFFFFFFFFF,FFFFFFFFFF:FFFFFFFF:FFFFFFFFFFFF:FFFFFF:  
@A00155:342:HHGFNDSXY:1:1320:23782:24205 2:N:0:GAACCTAG+TCCGCATA  
GACTCGTCAGGTAGCCTACTAGACTACGACTTACACGGTAGGTCGTGAACAAGCCCCGGAGTAGCATCTC  
CTTAGGA ACTAGGAGACCCTCGGTCTTGTC AACCTCTGTTTCGGCAGAGGATACCGTGCTCCACA  
+  
FFFFFFFFFFFFFFFFFFFFFFFFFFFFFFFFFFFFFFFFFFFFFFFFFFFFFFFFFFFFFFFFFFFFFFFF:  
FFF::FFFFFFFFFFFF:FFFFFFFFFFFF:FFFFFFFFFFFFFFFFFFFFFFFFFFFFFFFFFFFFFFFFF  
@A00155:342:HHGFNDSXY:1:1321:11333:7717 2:N:0:GAACCTAG+TCCGCATA  
TTGTGTAAGTTTCGTCCTAAAAAGGACTCGTCAGGTAGCCTACTAGACTACGACTTACACGGTAGGTC  
GTGAACAAGCCCCGGAGTAGCATCTCCTTTGAACTAGGAGACCCTCGGTCTTGTC AACCTCTGTT  
+  
FFFFFFFFFFFFFFFFFFFFFFFFFFFFFFFFFFFFFFFFFFFFFFFFFFFFFFFFFFFFFFFFFFFFFFFF:  
FFFFFFFF:FFFFFFFFFFFFFFFFFFFFFFFFFFFFFFFFFFFFFFFFFFFFFFFF:FFFF:FFFFFFFFFFFFFFFFF  
@A00155:342:HHGFNDSXY:1:1321:25373:16282 2:N:0:GAACCTAG+TCCGCATA  
TAGACTACGACTTACACGGTAGGTCGTGAACAAGCCCCGGAGTAGCATCTCCTTTGAACTAGGAGACC  
CTCCGGTCTTGTC AACCTCTGTTTCGGCAGAGGATACCGTGCTCCACAGCTGTAAGGCTGTGGGCC  
+  
FFFFFFFFFFFFFFFFFFFFFFFFFFFFFFFFFFFFFFFFFFFFFFFFFFFFFFFFFFFFFFFFFFFFFFFF:  
FFFFFFFFFFFFFFFFFFFFFFFFFFFFFFFFFFFFFFFFFFFFFFFFFFFFFFFF:FFFFFFFFF:FFFFFFFFF  
@A00155:342:HHGFNDSXY:1:1321:19623:31688 2:N:0:GAACCTAG+TCCGCATA  
AGGTAGCCTACTAGACTACGACTTACACGGTAGGTCGTGAACAAGCCCCGGAGTAGCATCTCCTTTGAA  
CTAGGAGACCCTCGGTCTTGTC AACCTCTGTTTCGGCAGAGGATACCGTGCTCCACAGCTGTAAG
```

FFFFFFFFFFFFFFFFFFFFFFFFFFFFFFFFFFFFFFFFFFFFFFFFFFFFFFFFFFFFF:FFFFFFFFFFFFFF:FFFFFFFFFFFFFF:FFFFFFFFFFFFFF  
FFFFFFFFFFFFFFFFFFFFFFFFFFFFFFFFFFFFFFFFFFFFFFFFFFFFFFFFFFFFFFFFFFFF:FFFFFFFFFFFFFFFFFFFFF  
@A00155:342:HHGFNDSXY:1:1322:11279:5462 2:N:0:GAACCTAG+TCCGCATA  
TAGACTACGACTTACACGGTAGGTTCGTGAACAAGCCCGGAGTACATCTCCTTTGGAAGTACAGAGACC  
CTCCGGTCTTGCCAACCTCTGTTTCGGCAGAGGATACCGTGCTCCACAGCTGTAAGGCTGTGGGCC  
+  
FFFFFFFFFFFFFFFFFFFFFFFFFFFFFFFFFFFFFFFFFFFFFFFFFFFFFFFFFFFFFFFFFFFFF  
FFFFFFFFFFFFFFFFFFFFFFFFFFFFFFFFFFFFFFFFFFFFFFFFFFFFFFFFFFFFFFFFFFFFF  
@A00155:342:HHGFNDSXY:1:1322:25030:8797 2:N:0:GAACCTAG+TCCGCATA  
ACCCCTCCGGTCTTGCCAACCTCTGTTTCGGCAGAGGATACCGTGCTCCACAGCTGTAAGGCTGTGG  
GCCCGAGAGAAGTCGCTCTCTCGCCCTTACATCCCTCTCGGCATTGAGATGACCATAGGCCAGAG  
+  
FFFFFFFFFFFFFFFFFFFFFFFFFFFFFFFFFFFFFFFFFFFFFFFFFFFFFFFFFFFFFFFFFFFFF  
FFFFFFFFFFFFFFFFFFFFFFFFFFFFFFFFFFFFFFFFFFFFFFFFFFFFFFFFFFFFFFFFFFFFF,  
:FFFFFFFF:F:FFFFF,FFF  
@A00155:342:HHGFNDSXY:1:1322:15167:9784 2:N:0:GAACCTAG+TCCGCATA  
ACTTACACGGTAGGTTCGTGAACAAGCCCGGAGTACATCTCCTTTGGAAGTACAGAGACCCCTCCGGTCT  
TGCCAACCTCTGTTTCGGCAGAGGATACCGTGCTCCACAGCTGTAAGGCTGTGGGCCCGAGAGAAGT  
+  
FFFFFFFFFFFFFFFFFFFFFFFF,FFFFFFFFFFFFFFFFFFFFFFFFFFFFFFFFFFFFFFFFFFFFFF  
,FFFFFFFFFFFF:F:FFFFFFFFFFFFFFFFFFFFFFFFFFFFFFFFFFFFFFFFFFFFFFFFFFFFF  
@A00155:342:HHGFNDSXY:1:1322:25211:21825 2:N:0:GAACCTAG+TCCGCATA  
AAAAGGACTCGTCAGGTAGCCTACTAGACTACGACTTACACGGTAGGTTCGTGAACAAGCCCGGAGTAC  
ATCTCCTTTGGAAGTACAGAGACCCCTCCGGTCTTGCCAACCTCTGTTTCGGCAGAGGATACCGTGCT  
+  
FFFFFFFFFFFFFFFFFFFFFFFFFFFFFFFFFFFFFFFFFFFFFFFFFFFFFFFFFFFFFFFFFFFFF  
FFFFFFFFFFFFFFFFFFFFFFFFFFFFFFFFFFFFFFFFFFFFFFFFFFFFFFFFFFFFFFFFFFFFF:  
FFFFFFFFFFFFFFFFFFFFFFFFFFFFFFFFFFFFF  
@A00155:342:HHGFNDSXY:1:1322:27010:36370 2:N:0:GAACCTAG+TCCGCATA  
CGGCAGAGGATACCGTGCTCCACAGCTGTAAGGCTGTGGGCCCGAGAGAAGTCGCTCTCTCTCGCCCT  
CCACATCCCTCTCGGCATTGAGATGACCATAGGCCAGAGGTGAGTCCTTAAGTGGACACAGCTG  
+  
FFFFFFFFFFFFFFFFFFFFFFFFFFFFFFFFFFFFFFFFFFFFFFFFFFFFFFFFFFFFFFFFFFFFF  
FFFFFFFFFFFFFFFFFFFFFFFFFFFFFFFFFFFFFFFFFFFFFFFFFFFFFFFFFFFFFFFFFFFFF:  
FFF:FFFFFFFFFFFFFFFFFFFFFFFFFFFFFFFFFFFFF:F,FFFFF  
@A00155:342:HHGFNDSXY:1:1323:9516:1720 2:N:0:GAACCTAG+TCCGCATA  
AAAAGGACTCGTCAGGTAGCCTACTAGACTACGACTTACACGGTAGGTTCGTGAACAAGCCCGGAGTAC  
ATCTCCTTTGGAAGTACAGAGACCCCTCCGGTCTTGCCAACCTCTGTTTCGGCAGAGGATACCGTGCT  
+  
FFF:FFFFFFFFFFFFFFFFFFFFFFFFFFFFFFFFFFFFFFFFFFFFFFFFFFFFFFFFFFFFF:  
FFFFFFFFFFFFFFFFFFFFFFFFFFFFFFFFFFFFFFFFFFFFFFFFFFFFFFFFFFFFFFFFFFFFF  
@A00155:342:HHGFNDSXY:1:1323:23891:3411 2:N:0:GAACCTAG+TCCGCATA  
CGAAACCGTCGTTACTCTTCGAGTTGTGTAAGTTTCGTCTAAAAAGGACTCGTCAGGTAGCCTACTA  
GACTACGACTTACACGGTAGGTTCGTGAACAAGCCCGGAGTACATCTCCTTTGGAAGTACAGAGACCCCT  
+  
FFFFFFFFFFFFFFFFFFFFFFFFFFFFFFFFFFFFFFFFFFFFFFFFFFFFFFFFFFFFFFFFFFFFF  
FFFFFFFFFFFFFFFFFFFFFFFFFFFFFFFFFFFFFFFFFFFFFFFFFFFFFFFFFFFFFFFFFFFFF:  
F:,FFFFFFFF:FFFFFFFFFFFF:FFFFFFFF:FFFFFFFFFFFFFFFFF  
@A00155:342:HHGFNDSXY:1:1323:10239:14559 2:N:0:GAACCTAG+TCCGCATA  
AACTAGGAGACCCCTCCGGTCTTGCCAACCTCTGTTTCGGCAGAGGATACCGTGCTCCACAGCTGTA  
AGGCTGTGGGCCCGAGAGAAGTCGCTCTCTCTCGCCCTCCACATCCCTCTCGGCAGTGAGATGAC  
+  
FFFFFFFFFFFFFFFFFFFFFFFF,FFFFFFFFFFFFFFFFFFFFFFFFFFFFFFFFFFFFFFFFFFFFFF:  
FFFFFFFFFFFFFFFFFFFFFFFFFFFFFFFFFFFFFFFFFFFFFFFFFFFFFFFFFFFFFFFFFFFFF,FFFFFFFFF  
@A00155:342:HHGFNDSXY:1:1323:7184:28682 2:N:0:GAACCTAG+TCCGCATA  
ACCGTGCTCCACAGCTGTAAGGCTGTGGGCCCGAGAGAAGTCGCTCTCTCTCGCCCTTACATCCCTC  
TCGGCATTGAGATGACCATAGGCCAGAGGTGAGTCCTTAAGTGGACACAGCTGATCTAAGGCGGTGTG

FFFFFFFFFFFFFFFF:FFFFFFFFFFFFFFFFFFFFFFFFFFFFFFFFFFFFFFFFFFFFFFFF  
FFFFFFFFFFFFFFFFFFFFFFFFFFFFFFFFFFFFFFFFFFFFFFFFFFFFFFFFFFFFFFFF:F  
@A00155:342:HHGFNDSXY:1:1324:17047:4711 2:N:0:GAACCTAG+TCCGCATA  
TCCTTTGGAAGTACGAGACCCCTCCGGTCTTGTCCAACCTCTGTTTCGGCAGAGGATACCGTGCTCCA  
CAGCTGTAAGGCTGTGGGCCCGAGAGAAGTCGCTCTCTCTCGCCCTCCACATCCCTCTCGGCATTGAG  
+  
FFFFFFFFF:FFFFFFFFFFFFFFFFFFFFFFFFFFFFFFFFFFFFFFFFFFFFFFFFFFFFFFFF  
FFFFFFFFFFFFFFFFF:FFFFFFFFFFFFFFFFFFFFFFFFFFFFFFFFFFFFFFFFFFFFFFFF,FFF  
@A00155:342:HHGFNDSXY:1:1324:2953:13933 2:N:0:GAACCTAG+TCCGCATA  
TGAACAAGCCCGAGTACATCTCCTTTGGAAGTACGAGACCCCTCCGGTCTTGTCCAACCTCTGTTTC  
GGCAGAGGATACCGTGCTCCACAGCTGTAAGGCTGTGGGCCCGAGAGAAGTCGCTCTCTCTCGCCCT  
+  
FFFFFFFFFFFFFFFFF:FFFF:FFF,FF:FFFF::,FFF:F:F:FF,FF:F,FFF,:FFFFFFFF,FF::  
FFFFFFFFFFFFF:FFFFFF:FFFFFFFFFFFFF:FFFFFFFF:FFFFFFFFF:FFFFFFFFFFFFF:FFFF  
@A00155:342:HHGFNDSXY:1:1324:30924:15311 2:N:0:GAACCTAG+TCCGCATA  
GAAACCGTCGTTACTCTTGAGTTGTGTAAGTTTCGTCCTAAAAAGGACTCGTCAGGTAGCCTACTAG  
ACTACGACTTACACGGTAGGTCGTGAACAAGCCCGAGTACATCTCCTTTGGAAGTACGAGACCCCTC  
+  
FFFFFFFFFFFFFFFFFFFF,FFFF,FFFFFFFFFFFFFFFFFFFFFFFFFFFFFFFFFFFFFFFFFFFFF  
FFFFFFFFFFFFFFFFFFFFF:FFFFFFFFFFFFFFFFFFFFF:FFFFFFFFFFFFFFFFFFFFF:FFF:FF  
@A00155:342:HHGFNDSXY:1:1324:31521:19633 2:N:0:GAACCTAG+TCCGCATA  
AGCCTACTAGACTACGACTTACACGGTAGGTCGTGAACAAGCCCGAGTACATCTCCTTTGGAAGTAC  
GAGACCCCTCCGGTCTTGTCCAACCTCTGTTTCGGCAGAGGATACCGTGCTCCACAGCTGTAAGGCTG  
+  
FFFFFFFFFFFFFFFFF:FFFFFFFFFFFFFFFFF:FFFFFFFFFFFFFFFFFFFFFFFFFFFFFFFFFFFFF  
FFFFFFFFFFFFFFFFFFFFF::FFFFFFFFFFFFFFFFFFFFFFFFFFFFF:FFFFFFFFFFFFFFFFFFFFF:FFFFFFFF  
@A00155:342:HHGFNDSXY:1:1324:4300:22592 2:N:0:GAACCTAG+TCCGCATA  
CGTTCCAAGGACGAAACCGTCGTTACTCTTTGAGTTGTGTAAGTTTCGTCCTAAAAAGGACTCGTCAG  
GTAGCCTACTAGACTACGACTTACACGGTAGGTCGTGAACAAGCCCGAGTACATCTCCTTTGGAAGT  
+  
FFFFFFFFFFFFFFFFFFFFFFFFFFFFFFFFFFFF:FFF,FFFFFFFFFFFFFFFFF:FFFFFFFF:FFFFFFFFFFFFFFFF  
FFFFFFFFFFFFFFFFFFFFFFFFF:F:F:FFFFFFFFF:FFFFFFFFF,,FFFFFFFFFFFFFFFFFFFFF:FF  
@A00155:342:HHGFNDSXY:1:1325:16541:20995 2:N:0:GAACCTAG+TCCGCATA  
TTTCGTCCTAAAAAGGACTCGTCAGGTAGCCTACTAGACTACGACTTACACGGTAGGTCGTGAACAAG  
CCCGGAGTACATCTCCTTTGGAACCAGGAGACCCCTCCGGTCTTGTCCAACCTCTGTTTCGGCAGAGG  
+  
F,FFFFFFFFFFFFFFFFFFFFFFFFF:FFFFFFFFFFFFFFFFFFFFFFFFFFFFFFFFFFFFFFFFFFFFF  
FFFFFFFFFFFFFFFFFFFFFFFFFFFFFFFFFFFFFFFFFFFFFFFFFFFFFFFFFFFFFFFFF:FFFFFFFF  
@A00155:342:HHGFNDSXY:1:1325:2121:34663 2:N:0:GAACCTAG+TCCGCATA  
AAGTCGCTCTCTCTCGCTCTCCACATCCCTCTCGGCATTGAGATGACCATAGGCCAGAGGTGAGTCCT  
TAAGTGGACACAGCTGATCTAAGGCGGTGTGGCGGGCATGGGTTTGAACCCCATGACGGTCGGAGT  
+  
FFFFFFFFFFFFFFFFFFFFFFFFFFFFF:FFFFFFFFFFFFFFFFFFFFFFFFFFFFFFFFFFFFF:FFFFFFFFFFFFFFFF:FF  
F::FFFFFFFFFFFFF,FFFFFFFFFFFFFFFFFFFFF:FF:FFFFFFFFFFFFFFFFF:FF:FFFFFFFF  
@A00155:342:HHGFNDSXY:1:1326:13792:3834 2:N:0:GAACCTAG+TCCGCATA  
AAAAAGGACTCGTCAGGTAGCCTACTAGACTACGACTTACACGGTAGGTCGTGAACAAGCCCGAGTA  
CATCTCCTTTGGAAGTACGAGACCCCTCCGGTCTTGTCCAACCTCTGTTTCGGCAGAGGATACCGTGC  
+  
FFFFFFFFF:FFFFFFFFFFFFFFFFFFFFFFFFFFFFF:FFFFFFFFF:FFFFFFFF:FFFFFFFF:FFFFFFFF  
:FFF:F:,FFFFFFFFFFFFFFFFFFFFFFFFFFFFF:FFFFFFFFFFFFFFFFF:FFFFFFFFFFFFFFFFF:F:  
@A00155:342:HHGFNDSXY:1:1326:13973:21778 2:N:0:GAACCTAG+TCCGCATA  
GTGAACAAGCCCGAGTACATCTCCTTTGGAAGTACGAGACCCCTCCGGTCTTGTCCAACCTCTGTTT  
CGGCAGAGGATACCGTGCTCCACAGCTGTAAGGCTGTGGGCCCGAGAGAAGTCGCTCTCTCTCGCCCT  
+

FFFFFFFFFFFFFFFFFFFFFFFFFFFFFFFFFFFFFFFFFFFFFFFFFFFFFFFFFFFFFFFFFFFFFFFFFFFFF:  
FFFFFFFFFFFFFFFFFFFFFFFFFFFFFFFFFFFFFFFFFFFFFFFFFFFFFFFFFFFFFFFFFFFFFFFFFFFF  
@A00155:342:HHGFNDSXY:1:1326:29405:28588 2:N:0:GAACCTAG+TCCGCATA  
TCCTTGGAACGACTCATCAGGGAGCCTACTAGACTCCGACCGTCATGGGGTTCAAACCCATGCCCG  
GCTACACCGCCTTAGATCAGCTGTGTCCAACCTTAAGGACTCACCTCTGGCCTATGGTCATCTCAATGCC  
+  
FFFFFFFFFFFFFFFFFFFFFFFFFFFFFFFFFFFFFFFFFFFFFFFFFFFFFFFFFFFFFFFFFFFFFFFFFFFF  
FFFFFFFFFFFFFFFFFFFFFFFFFFFFFFFFFFFFFFFFFFFFFFFFFFFFFFFFFFFFFFFFFFFFFFFFFFFF  
@A00155:342:HHGFNDSXY:1:1326:10095:30436 2:N:0:GAACCTAG+TCCGCATA  
TACACGGTAGGTCGTGAACAAGCCCGGAGTACATCTCCTTTGGAAGTGGGAGACCCCTCCGGTCTTGT  
CCAACCTCTGTTTCGGCAGAGGATACCGTGCTCCACAGCTGTAAGGCTGTGGGCCCGAGAGAAGTCGC  
+  
FFFFFFFFFFFFFFFFFFFFFFFFFFFFFFFFFFFFFFFFFFFFFFFFFFFFFFFFFFFFFFFFFFFFFFFFFFFF  
FFFFFFFFFFFFFFFFFFFFFFFFFFFFFFFFFFFFFFFFFFFFFFFFFFFFFFFFFFFFFFFFFFFFFFFFFFFF  
@A00155:342:HHGFNDSXY:1:1326:4752:33896 2:N:0:GAACCTAG+TCCGCATA  
GTACATCTCCTTTGGAAGTGGGAGACCCCTCCGGTCTTGTCCAACCTCTGTTTCGGCAGAGGATACCG  
TGCTCCACAGCTGTAAGGCTGTGGGCCCGAGAGAAGTCGCTCTCTCTCGCCCTCTACATCCCTCTCGG  
+  
FFFFFFFFFFFFFFFFFFFFFFFFFFFFFFFFFFFFFFFFFFFFFFFFFFFFFFFFFFFFFFFFFFFFFFFFFFFF  
FFFFFFFFFFFFFFFFFFFFFFFFFFFFFFFFFFFFFFFFFFFFFFFFFFFFFFFFFFFFFFFFFFFFFFFFFFFF  
@A00155:342:HHGFNDSXY:1:1327:11623:4429 2:N:0:GAACCTAG+TCCGCATA  
CACGGTAGGTCGTGAACAAGCCCGGAGTACATCTCCTTTGGAAGTGGGAGACCCCTCCGGTCTTGTCC  
AACCTCTGTTTCGGCAGAGGATACCGTGCTCCACAGCTGTAAGGCTGTGGGCCCGAGAGAAGTCGCTC  
+  
FFFFFFFFFFFFFFFFFFFFFFFFFFFFFFFFFFFFFFFFFFFFFFFFFFFFFFFFFFFFFFFFFFFFFFFFFFFF  
FFFFFFFFFFFFFFFFFFFFFFFFFFFFFFFFFFFFFFFFFFFFFFFFFFFFFFFFFFFFFFFFFFFFFFFFFFFF  
@A00155:342:HHGFNDSXY:1:1327:5014:17848 2:N:0:GAACCTAG+TCCGCATA  
TAGACTACGACTTACACGGTAGGTCGTGAACAAGCCCGGAGTACATCTCCTTTGGAAGTGGGAGACCC  
CTCCGGTCTTGTCCAACCTCTGTTTCGGCAGAGGATACCGTGCTCCACAGCTGTAAGGCTGTGGGCC  
+  
FFFFFFFFFFFFFFFFFFFFFFFFFFFFFFFFFFFFFFFFFFFFFFFFFFFFFFFFFFFFFFFFFFFFFFFFFFFF  
FFFFFFFFFFFFFFFFFFFFFFFFFFFFFFFFFFFFFFFFFFFFFFFFFFFFFFFFFFFFFFFFFFFFFFFFFFFF  
@A00155:342:HHGFNDSXY:1:1327:30572:25504 2:N:0:GAACCTAG+TCCGCATA  
TCAGGTAGCCTACTAGACTACGACTTACACGGTAGGTCGTGAACAAGCCCGGAGTACATCTCCTTTGG  
AACTAGGAGACCCCTCCGGTCTTGTCCAACCTCTGTTTCGGCAGAGGATACCGTGCTCCACAGCTGTA  
+  
FFFFFFFFFFFFFFFFFFFFFFFFFFFFFFFFFFFFFFFFFFFFFFFFFFFFFFFFFFFFFFFFFFFFFFFFFFFF  
FFFFFFFFFFFFFFFFFFFFFFFFFFFFFFFFFFFFFFFFFFFFFFFFFFFFFFFFFFFFFFFFFFFFFFFFFFFF  
@A00155:342:HHGFNDSXY:1:1327:24813:32722 2:N:0:GAACCTAG+TCCGCATA  
GTGTAAGTTTCGTCCTAAAAAGGACTCGTCAGGTAGCCTACTAGACTACGACTTACACGGTAGGTCGT  
GAACAAGCCCGGAGTACATCTCCTTTGGAAGTGGGAGACCCCTCCGGTCTTGTCCAACCTCTGTTTCG  
+  
FFFFFFFFFFFFFFFFFFFFFFFFFFFFFFFFFFFFFFFFFFFFFFFFFFFFFFFFFFFFFFFFFFFFFFFFFFFF  
FFF,FFFFFFFFFFFFFFFFFFFFFFFFFFFFFFFFFFFFFFFFFFFFFFFFFFFFFFFFFFFFFFFFFFFFFFF  
@A00155:342:HHGFNDSXY:1:1327:25446:32753 2:N:0:GAACCTAG+TCCGCATA  
GTGTAAGTTTCGTCCTAAAAAGGACTCGTCAGGTAGCCTACTAGACTACGACTTACACGGTAGGTCGT  
GAACAAGCCCGGAGTACATCTCCTTTGGAAGTGGGAGACCCCTCCGGTCTTGTCCAACCTCTGTTTCG  
+  
FFFFFFF,FFFFFFFFFFFFFFFFFFFFFFFFFFFFFFFFFFFFFFFFFFFFFFFFFFFFFFFFFFFFFFFFFFFF  
FFFFFFFFFFFFFFFFFFFFFFFFFFFFFFFFFFFFFFFFFFFFFFFFFFFFFFFFFFFFFFFFFFFFFFFFFFFF  
@A00155:342:HHGFNDSXY:1:1327:26096:33348 2:N:0:GAACCTAG+TCCGCATA  
ACTAGACTACGACTTACACGGTAGGTCGTGAAAAGCCCGGAGTACATCTCCTTTGGAAGTGGGAGAC  
CCCTCCGGTCTTGTCCAACCTCTGTTTCGGCAGAGGATACCGTGCTCCACAGCTGTAAGGCTGTGGG  
+

FFFF:FFFF,FFFFFFFF:FFFF:F,F::FF,FFFFFFFF:FFFFFFFF:FFF,,:FFFF,FFFF:  
,FFFFFF:F,F:F,FFFFFFFF:F:F,:F:FF,F,::,F:, :FF:FF:FF,FFFFFF,FFF:FFFF  
@A00155:342:HHGFNDSXY:1:1328:22263:8077 2:N:0:GAACCTAG+TCCGCATA  
GGATACCGTGCTCCACAGCTGTAAGGCTGTGGGCCCGAGAGAAGTCGCTCTCTCTCGCCCTCTACATC  
CCTCTCGGCATTGAGATGACCATAGGCCAGAGGTGAGTCCTTAAGTGGACACAGCTGATCTAAGG  
+  
FFFFFFFFFFFFFFFFFFFFFFFF:FFFFFFFFFFFFFFFFFFFFFFFFFFFFFFFFFFFFFFFF:FFFFF  
F:FFFFFFFFFFFFFFFFFFFFFFFFFFFFFFFF:FFFFFFFF:FF::FFF:FFFFFFFF,FFFFFF,FF  
@A00155:342:HHGFNDSXY:1:1328:5656:21590 2:N:0:GAACCTAG+TCCGCATA  
AAGCCCGAGTACATCTCCTTTGGAAGTACTAGGAGACCCCTCCGGTCTTGTCCAACCTCTGTTTCGGCAG  
AGGATACCGTGCTCCACAGCTGTAAGGCTGTGGGCCCGAGAGAAGTCGCTCTCTCTCGCCCTCCACAT  
+  
FFF::FFFFFFFFFFFFFFFF:FFF:FFFFFFFFFFFFFFFF:FF:FF:FFFFFFFFFFFFFFFF  
FFFF:,FFFFFFFFFFFFFFFF,FFFFFFFF:F:FFFFFFFF:FFFFFFFFFFFFFFFF  
@A00155:342:HHGFNDSXY:1:1328:17300:33270 2:N:0:GAACCTAG+TCCGCATA  
TCCTTGGAACGACTCATCAGGGAGCCTACTAGACTCCGACCGTCATGGGGTTCAAACCCATGCCCC  
GCCACACCGCCTTAGATCAGCTGTGTCCACTTAAGGACTCACCTCTGGCCTATGGTCATCTCAATGCC  
+  
FFFFFFFFFFFFFFFF:FFFFFFFFFFFFFFFFFFFFFFFFFFFFFFFFFFFFFFFFFFFFFFFF  
FFFFFFFFFFFFFFFFFFFFFFFFFFFFFFFF:FFFFFFFFFFFFFFFFFFFFFFFF,FFFFFF:FF  
@A00155:342:HHGFNDSXY:1:1329:1759:7420 2:N:0:GAACCTAG+TCCGCATA  
CTCTTTGAGTTGTGTAAGTTTCGTCCTAAAAAGGACTCGTCAGGTAGCCTACTAGACTACGACTTACA  
CGGTAGGTCGTGAACAAGCCCGAGTACATCTCCTTTGGAAGTACTAGGAGACCCCTCCGGTCTTGTCCAA  
+  
FF::FFF:FFF:FF:FF:FFFFFFFFFFFFFFFF:FFFFFFFF:FFFFFFFFFFFFFFFF:FF  
FFFFFFFFFFFFFFFF,FFFFFFFFFFFFFFFF:FFFFFFFFFFFFFFFF:FFFFFFFF:FFFFF  
@A00155:342:HHGFNDSXY:1:1329:24858:21371 2:N:0:GAACCTAG+TCCGCATA  
GAACTAGGAGACCCCTCCGGTCTTGTCCAACCTCTGTTTCGGCAGAGGATACCGTGCTCCACAGCTGT  
AAGGCTGTGGGCCCGAGAGAAGTCGCTCTCTCTCGCCCTCCACATCCCTCTCGGCATTGAG  
+  
FFF:FFFFFFFF:FFFFFFFF:FFFFF:F:FFF::FF:FFFF:F,::FFFFFFFF,FFF  
FF:F,:FF:F,FFFFFF,:F:F:F:FFFFFF,:FFF:FFFF,FFFFF,:FFF,FFF  
@A00155:342:HHGFNDSXY:1:1329:9399:22091 2:N:0:GAACCTAG+TCCGCATA  
AGCCCGAGTACATCTCCTTTGGAAGTACTAGGAGACCCCTCCGGTCTTGTCCAACCTCTGTTTCGGCAGA  
GGATACCGTGCTCCACAGCTGTAAGGCTGTGGGCCCGAGAGAAGTCGCTCTCTCTCGCCCTC  
+  
FFFFFFFFFFFFFFFFFFFFFFFF:FFFFFFFFFFFFFFFFFFFFFFFFFFFFFFFFFFFFFFFF  
FFFFFFFFFFFFFFFFFFFFFFFFFFFFFFFF:FFFFFFFFFFFFFFFFFFFFFFFF  
@A00155:342:HHGFNDSXY:1:1329:9688:23312 2:N:0:GAACCTAG+TCCGCATA  
AAAAGGACTCGTCAGGTAGCCTACTAGACTACGACTTACACGGTAGGTCGTGAACAAGCCCGAGTAC  
ATCTCCTTTGGAAGTACTAGGAGACCCCTCCGGTCTTGTCCAACCTCTGTTTCGGCAGAGGATACCGTGCT  
+  
FFFFFFFFFFFFFFFFFFFFFFFFFFFFFFFFFFFFFFFFFFFFFFFFFFFFFFFFFFFFFFFF  
FFFFFFFFFFFFFFFFFFFFFFFFFFFFFFFF:FFFFFFFFFFFFFFFFFFFFFFFFFFFFFFFF  
@A00155:342:HHGFNDSXY:1:1329:17065:33708 2:N:0:GAACCTAG+TCCGCATA  
TAGGAGACCCCTCCGGTCTTGTCCAACCTCTGTTTCGGCAGAGGATACCGTGCTCCACAGCTGTAAGG  
CTGTGGGCCCGAGAGAAGTCGCTCTCTCTCGCCCTCTACATCCCTCTCGGCATTGAGATGACCATAGG  
+  
FFFFFFFFFFFFFFFF:FFFFFFFFFFFFFFFFFFFFFFFFFFFFFFFFFFFFFFFFFFFFFFFF  
FFFFFFFFFFFFFFFF:FFFFFFFFFFFFFFFFFFFFFFFF:FFFFFFFFFFFFFFFFFFFFFFFF  
@A00155:342:HHGFNDSXY:1:1329:17291:36292 2:N:0:GAACCTAG+TCCGCATA  
TAGGAGACCCCTCCGGTCTTGTCCAACCTCTGTTTCGGCAGAGGATACCGTGCTCCACAGCTGTAAGG  
CTGTGGGCCCGAGAGAAGTCGCTCTCTCTCGCCCTCTACATCCCTCTCGGCATTGAGATGACCATAGG  
+

```
FFFFFFFFFFFFFFFFFFFFFFFFFFFFFFFFFFFFFFFFFFFFFFFFFFFFFFFFFFF:FFFFFFFFFFFFFFFFFFFFFFFFFF  
FFFFFFFFFFFFFFFFFFFFFFFFFFFFFFFFFFFFFFFFFFFFFFFFFFFFFFFFFFFFFFFFFF:FFFFFFFFFFFF,FFFF  
@A00155:342:HHGFNDSXY:1:1330:21043:2362 2:N:0:GAACCTAG+TCCGCATA  
GAACTAGGAGACCCCTCCGGTCTTGTTCCAACCTCTGTTCGGCAGAGGATACCGTGCTCCACAGCTGT  
AAGGCTGTGGGCCCGAGAGAAGTCGCTCTCTCTCGCCCTCCACATCCCTCTCGGCATTGAGATGACCA  
+  
FFFFFFFFFFFFFFFFFFFFFFFFFFFFFFFFFFFFFFFFFFFFFFFFFFFFFFFFFF:FFFFFFFFFFFFFFFFFFFFFFFFFF  
FFFFFFFFFFFFFFFFFFFFFFFFFFFF,FFFFFFFFFFFFFFFFFFFFFFFFFFFFFFFFFFFFFF:FFFFFFFFFFFFF  
@A00155:342:HHGFNDSXY:1:1330:2889:5243 2:N:0:GAACCTAG+TCCGCATA  
TCGGCAGAGGATACCGTGCTCCACAGCTGTAAGGCTGTGGGCCCGAGAGAAGTCGCTCTCTCTCGCCC  
TTCACATCCCTCTCGGCATTGAGATGACCATAGGCCAGAGGTGAGTCCTTAAGTGGAC  
+  
FFFFFFF:F:FFFFFFFFFFFFFFFFFFFFFFFFFFFFFFFFFFFFFFFFFFFFFFFFFF:FFFFFFFFFFFF:FFF  
FFFFFFFFFFFFFFFFFFFFFFFFFFFF,FFFFFFFFFFFFFFFFFFFFFFFFFFFFFFFFFFFFFF::FFFFFFFFFFFF  
@A00155:342:HHGFNDSXY:1:1330:24397:24173 2:N:0:GAACCTAG+TCCGCATA  
AAAAGGACTCGTCAGGTAGCCTACTAGACTACGACTTACACGGTAGGTTGTGAACAAGCCCCGGAGTAC  
ATCTCCTTTGGAAGTAGGAGACCCCTCCGGTCTTGTTCCAACCTCTGTTCGGCAGAGGATACCGTGCT  
+  
FFF:FFFFFFFFFFFFFFFFFFFFF:FF,FFFFFF:FFFFFFFFFFFFFFFF:FFFFFFFFFFFFFFFFFFFFFFFFFFFF  
FFFFFFFFFFFFFFFFFFFFFFFFFFFF:FFFFFFFFFFFFF::FFFFFFFFFFFFFFFFFFFFFFFFFFFFFFFFFFFF  
@A00155:342:HHGFNDSXY:1:1330:5810:32064 2:N:0:GAACCTAG+TCCGCATA  
CCCCTCCGGTCTTGTTCCAACCTCTGTTCGGCAGAGGATACCGTGCTCCACAGCTGTAAGGCTGTGGG  
CCCAGAGAAGTCGCTCTCTCTCGCCCTTCACATCCCTCTCGGCATTGAGATGACCATAGGCCAGAGG  
+  
FFFFFFFFFFFFFFFFFFFFFFFFFFFFFFFFFFFFFFFFFFFFFFFFFFFFFFFFFF:FFFFFFFFFFFFFFFFFFFFFFFFFF  
FFFFFFFFF:FFFFFFFFF:FFFFFFFFFFFFFFFFFFFFFFFFFFFFFFFFFFFFF,,FFF:FFFFFFFFFFFFFFFFFFFF  
@A00155:342:HHGFNDSXY:1:1330:5674:32330 2:N:0:GAACCTAG+TCCGCATA  
CCCCTCCGGTCTTGTTCCAACCTCTGTTCGGCAGAGGATACCGTGCTCCACAGCTGTAAGGCTGTGGG  
CCCAGAGAAGTCGCTCTCTCTCGCCCTTCACATCCCTCTCGGCATTGAGATGACCATAGGCCAGAGG  
+  
FFFFFFFFFFFFFFFFFFFFFFFFFFFFFFFFFFFFFFFFFFFFFFFFFFFFFFFFFF:FFFFFFFFFFFFFFFFFFFFFFFFFF  
FFFFFFFFF:FFFFFFFFF:FFFFFFFFFFFFFFFFFFFFFFFFFFFFFFFFFFFFF,,FFF:FFFFFFFFFFFFFFFFFFFF  
@A00155:342:HHGFNDSXY:1:1330:5023:36495 2:N:0:GAACCTAG+TCCGCATA  
GACGAAACCGTCGTTACTCTTTGAGTTGTGTAAGTTTCGTCCTAAAAAGGACTCGTCAGGTAGCCTAC  
TAGACTACGACTTACACGGTAGGTCGTGAACAAGCCCCGGAGTACATCTCCTTTGGAAGTAGGAGACCC  
+  
FFFFFFFFFFFFFFFFFFFFFFFFFFFF,F:FFFFFFFFF:F:FFFFFFFFF:FFFFFFFFFFFFFFFFFFFFFFFFFFFF:FFFFFFF  
FFFFFFFFFFFFFFFFFFFFFFFFFFFFFFFFFFFFFFFFFFFFFFFFFF:FFFFFFFFFFFFFFFFFFFFFFFFFFFFFFFFFF  
@A00155:342:HHGFNDSXY:1:1331:11822:9408 2:N:0:GAACCTAG+TCCGCATA  
AAGCCCGAGTACATCTCCTTTGGAAGTAGGAGACCCCTCCGGTCTTGTTCCAACCTCTGTTCGGCAG  
AGGATACCGTGCTCCACAGCTGTAAGGCTGTGGGCCCGAGAGAAGTCGCTCTCTCTCGCCCTCCACAT  
+  
FFFFFFF:FFFFFFFFFFFFFFFFFFFFFFFFFFFFFFFFFFFFFFFFFF:FFFFFFFFFFFFFFFFFFFFFFFFFFFFFFFFFF  
FFFFFFFFFFFFFFFFFFFFFFFFFFFFFFFFFF:FFFFFFFFFFFFFFFFFFFFF:,FFFFFFFFFFFFFFFFFFFFFFFFFFFF  
@A00155:342:HHGFNDSXY:1:1331:31783:10473 2:N:0:GAACCTAG+TCCGCATA  
GGTCTTGTTCCAACCTCTGTTCGGCAGAGGATACCGTGCTCCACAGCTGTAAGGCTGTGGGCCCGAGA  
GAAGTCGCTCTCTCTCGCCCTCCACATCCCTCTCGGCATTGAGATGACCATAGGCCAGAGGTGAGTCC  
+  
FFFF,FFFFF:FFFFFFF,FFFFFFFFFFFFFFFFFFFFFFFFFFFFFFFFFFFFFFFFFFFFFFFFFF:FFFFFFFFFFFFF  
FFFFFFFFFFFFFFFFFFFFFFFFFFFFFFFFFF:FFFFFFFFFFFFFFFFFFFFF:,FFFFFFFFFFFFFFFFFFFFFFFFFFFF  
@A00155:342:HHGFNDSXY:1:1331:31919:10614 2:N:0:GAACCTAG+TCCGCATA  
GGTCTTGTTCCAACCTCTGTTCGGCAGAGGATACCGTGCTCCACAGCTGTAAGGCTGTGGGCCCGAGA  
GAAGTCGCTCTCTCTCGCCCTCCACATCCCTCTCGGCATTGAGATGACCATAGGCCAGAGGTGAGTCC  
+
```

FF,FFFFFFFF:FFF:FFFFFFFFFFFFFFFFFFFF,FFF:FFFFFFFFFFFF  
FF,FFFFFFFF:FFFFFFFFFFFFFFFFFFFFFFFFFFFF,FFFFFFFFFFFFFFFFFFFFFFFFFFFF  
@A00155:342:HHGFNDSXY:1:1332:23656:9079 2:N:0:GAACCTAG+TCCGCATA  
CTCCACAGCTGTAAGGCTGTGGGCCCCGAGAGAAGTCGCTCTCTCGCCCTCCACATCCCTCTCGGCA  
TTGAGATGACCATAGGCCAGAGGTGAGTCCTTAAGTGGACACAGCTGATCTAAGGCGGTGTGGCGGGG  
+  
FFFFFFFFFFFFFFFFFFFFFFFFFFFFFFFFFFFFFFFFFFFFFFFFFFFFFFFFFFFFFFFFFFFFFFFF  
,FFFFFFFF:FFFFFFFFFFFFFFFFFFFFFFFFFFFFFFFFFFFFFFFFFFFFFFFFFFFFFFFFFFFFFFFF  
@A00155:342:HHGFNDSXY:1:1332:25337:11647 2:N:0:GAACCTAG+TCCGCATA  
CTCGAAGAGTAACGACGGTTTCGTCCTTGGAACGGACTIONCATCAGGGAGCCTACTAGACTCCGACCGTC  
ATGGGGGTTCAAACCCATGCCCGCCACACCGCCTTAGATCAGCTGTGTCCACTTAAGGACTCACCTC  
+  
FFFFFFFFFFFFFFFFFFFFFFFFFFFFFFFFFFFFFFFFFFFFFFFFFFFFFFFFFFFFFFFFFFFFFFFF  
F:FFFF:FFFFFFFFFFFFFFFFFFFFFFFFFFFFFFFFFFFFFFFFFFFFFFFFFFFFFFFFFFFFFFFF  
@A00155:342:HHGFNDSXY:1:1332:24632:35540 2:N:0:GAACCTAG+TCCGCATA  
CCTTTTATAGGACGAACTTACACAACCTGAAGAGTAACGACGGTTTCGTCCTTGGAACGGACTIONCATCA  
GGGAGCCTACTAGACTCCGACCGTCATGGGGGTTCAAACCCATGCCCGCCACACCGCCTTAGATCAG  
+  
FFFF:FFFFFFFF:FFFFFFFFFFFFFFFFFFFFFFFFFFFFFFFFFFFFFFFFFFFFFFFFFFFFFFFF  
FFFFFFFF:FFFFFFFF:FFFFFFFFFFFFFFFFFFFFFFFFFFFFFFFFFFFFFFFFFFFFFFFFFFFFFFFF  
@A00155:342:HHGFNDSXY:1:1333:19849:2394 2:N:0:GAACCTAG+TCCGCATA  
CGTTACTCTTCGAGTTGTGTAAGTTTCGTCCTAAAAAGGACTCGTCAGGTAGCCTACTAGACTACGAC  
TTACACGGTAGGTCGTGAACAAGCCCGAGTACATCTCCTTTGGAAGTAGGAGACCCCTCCGGTCTTG  
+  
FFFFFFFFFFFF:FFFFFF:FFF:FFFFF:FFFFFFFFFFFFFFFFFFFFFFFFFFFFFFFFFFFFFFFF  
FFFFFFFFFFFFFFFF:FFFFFFFFFFFFFFFFFFFFFFFFFFFFFFFFFFFFFFFFFFFFFFFFFFFFFFFF  
@A00155:342:HHGFNDSXY:1:1333:23312:9111 2:N:0:GAACCTAG+TCCGCATA  
GGACTCGTCAGGTAGCCTACTAGACTACGACTTACACGGTAGGTCGTGAACAAGCCCGGAGTACATCT  
CCTTTGGAAGTAGGAGACCCCTCCGGTCTTGTCACACCTCTGTTTCGGCAGAGGATACCGTGCTCCAC  
+  
:FFFFFFFFFFFF:FFFFFFFFFFFFFFFFFFFFFFFFFFFFFFFFFFFFFFFFFFFFFFFFFFFFFFFF  
FFFFFFFFFFFFFFFFFFFFFFFFFFFFFFFF:FFFFFFFFFFFF:F:FFFFFFFFFFFFFFFFFFFFFFFF  
@A00155:342:HHGFNDSXY:1:1333:18783:14544 2:N:0:GAACCTAG+TCCGCATA  
AGACTACGACTTACACGGTAGGTCGTGAACAAGCCCGGAGTACATCTCCTTTGGAAGTAGGAGACCC  
TCCGGTCTTGTCACACCTCTGTTTCGGCAGAGGATACCGTGCTCCACAGCTGTAAGGCTGTGGGCC  
+  
FFFFFFF:FFFFFFFFF:FFFFFFFFFFFFFFFF:FFFFFFFFFFFFFFFFFFFFFFFFFFFFFFFF,FFFFFF:FF  
FFFF:FF::F:FFFFFFFFFFFFFFFF:FFFFFFFF:FFFFFFFF:FFFFFFFFFFFFFFFFFFFFFFFF  
@A00155:342:HHGFNDSXY:1:1333:23285:17487 2:N:0:GAACCTAG+TCCGCATA  
TTACACGGTAGGTCGTGAACAAGCCCGGAGTACATCTCCTTTGGAAGTAGGAGACCCCTCCGGTCTTG  
TCCACCTCTGTTTCGGCAGAGGATACCGTGCTCCACAGCTGTAAGGCTGTGGGCCCGAGAGAAGTCG  
+  
FFFFFFFFFFFF:FFFFFFFFFFFFFFFFFFFFFFFFFFFFFFFFFFFFFFFFFFFFFFFFFFFFFFFF:FF  
FFFFFFFFFFFFFFFFFFFFFFFFFFFFFFFFFFFFFFFFFFFFFFFFFFFFFFFFFFFFFFFF:FFFF:FFFF  
@A00155:342:HHGFNDSXY:1:1333:5150:20838 2:N:0:GAACCTAG+TCCGCATA  
ACGAAACCGTCGTTACTCTTCGAGTTGTGTAAGTTTCGTCCTAAAAAGGACTCGTCAGGTAGCCTACT  
AGACTACGACTTACACGGTAGGTCGTGAACAAGTCGGAGTACATCTCCTTTGGAAGTAGGAGACCC  
+  
FFFFFFFFFFFFFFFF:FFFFFFFFFFFFFFFFFFFFFFFFFFFFFFFFFFFFFFFFFFFFFFFFFFFFFFFF  
FFFF:FFFFFFFFFFFFFFFFFFFFFFFFFFFFFFFFFFFFFFFFFFFFFFFFFFFFFFFF:FFFFFFFFFFFFFFFF  
@A00155:342:HHGFNDSXY:1:1334:31937:1282 2:N:0:GAACCTAG+TCCGCATA  
ACTAGACTACGACTTACACGGTAGGTCGTGAACAAGCCCGGAGTACATCTCCTTTGGAAGTAGGAGAC  
CCCTCCGGTCTTGTCACACCTCTGTTTCGGCAGAGGATACCGTGCTCCACAGCTGTAAGGCTGTGGGC  
+



FFFFFFFF:FFFFFFFFFFFFFFFFFFFFFFFFFFFFFFFFFFFFFFFFFFFFFFFFFFFFFFFFFFFFFFFFFFFFFFFF,FFFFF:F,FFFFFFFF  
FFFFFFFFFFFFFFFFFFFFFFFFFFFFFFFFFFFFFFFFFFFFFFFFFFFFFFFFFFFFFFFFFFFFFFFF:FFFFFFFFFFFFFFFFFFFFFFFF,FFFFFFFF  
@A00155:342:HHGFNDSXY:1:1335:30825:6652 2:N:0:GAACCTAG+TCCGCATA  
GGACTCGTCAGGTAGCCTACTAGACTACGACTTACACGGTAGGTCGTGAACAAGCCCGGAGTACATCT  
CCTTTGGAACCAGGAGACCCCTCCGGTCTTGTCCAACCTCTGTTTCGGCAGAGGATACCGTGCTCCAC  
+  
FFFF:FFFFFFFFFFFFFFFFFFFFFFFFFFFFFFFFFFFFFFFFFFFFFFFFFFFFFFFFFFFFFFFFFFFFFFFF:FFFFFFFF  
FFFFFFFF:FFFFFFFFFFFFFFFFFFFFFFFFFFFFFFFFFFFFFFFFFFFFFFFFFFFFFFFFFFFFFFFF:FFFFFFFF  
@A00155:342:HHGFNDSXY:1:1335:25102:7983 2:N:0:GAACCTAG+TCCGCATA  
AAAAGGACTCGTCAGGTAGCCTACTAGACTACGACTTACACGGTAGGTCGTGAACAAGCCCGGAGTAC  
ATCTCCTTTGGAAGTAGGAGACCCCTCCGGTCTTGTCCAACCTCTGTTTCGGCAGAGGATACCGTGCT  
+  
FFFFFFFFFFFFFFFFFFFFFFFFFFFFFFFFFFFFFFFFFFFFFFFFFFFFFFFFFFFFFFFFFFFFFFFF:FFFFFFFF  
:FFFFFFFFFFFFFFFF,FFFFFFFFFFFFFFFFFFFFFFFF:F:FFFFFFFFFFFFFFFFFFFFFFFFFFFFFFFF:FFF,FFFFFF  
@A00155:342:HHGFNDSXY:1:1335:10321:14325 2:N:0:GAACCTAG+TCCGCATA  
GGTCGTGAACAAGCCCGGAGTACATCTCCTTTGGAAGTAGGAGACCCCTCCGGTCTTGTCCAACCTCT  
GTATCGGCAGAGGATACCGTGCTCCACAGCTGTAAGGCTGTGGGCCCGAGAGAAGTCGCTCTCTCTCG  
+  
FFFFFFFFFFFFFFFFFFFFFFFFFFFFFFFFFFFFFFFFFFFFFFFFFFFFFFFFFFFFFFFFFFFFFFFF:FFFFFFFF  
FFFFFFFFFFFFFFFFFFFFFFFFFFFFFFFFFFFFFFFFFFFFFFFFFFFFFFFFFFFFFFFF:FFFFFFFF  
@A00155:342:HHGFNDSXY:1:1336:14850:4946 2:N:0:GAACCTAG+TCCGCATA  
GTTACTCTTCGAGTTGTGTAAGTTTCGTCCTAAAAAGGACTCGTCAGGTAGCCTACTAGACTACGACT  
TACACGGTAGGTCGTGAACAAGCCCGGAGTACATCTCCTTTGGAAGTAGGAGACCCCTCCGGTCTTGT  
+  
FFFFFFFFFFFFFFFFFFFFFFFFFFFFFFFFFFFFFFFFFFFFFFFFFFFFFFFFFFFFFFFFFFFFFFFF:FFFFFFFF  
FFFFFFFFFFFFFFFFFFFFFFFF,FFF,FFFF:FFFFFFFFFFFFFFFFFFFFFFFFFFFFFFFFFFFFFFFFFFFFFFFF  
@A00155:342:HHGFNDSXY:1:1336:24062:9095 2:N:0:GAACCTAG+TCCGCATA  
TTTGTGTAAGTTTCGTCCTAAAAAGGACTCGTCAGGTAGCCTACTAGACTACGACTTACACGGTAGGT  
CGTGAACAAGCCCGGAGTACATCTCCTTTGGAAGTAGGAGACCCCTCCGGTCTTGTCCAACCTCTGTT  
+  
FFFFFFFFFFFFFFFFFFFFFFFFFFFFFFFF,FF:FFF:FF:FFFFFFFF:FFFF:FFFFFFFFFFFFFFFFFFFFFFFFFFFFFFFF  
FFFFFFFFFFFFFFFFFFFFFFFFFFFFFFFFFFFFFFFFFFFFFFFFFFFFFFFFFFFFFFFF:FFFFFFFFFFFFFFFFFFFFFFFF:F  
@A00155:342:HHGFNDSXY:1:1337:22598:13322 2:N:0:GAACCTAG+TCCGCATA  
ACCGCCTTAGATCAGCTGTGTCCACTTAAGGACTCACCTCTGGCCTATGGTCATCTCAATGCCGAGAG  
GGATGTGAAGGGCGAGAGAGAGCGACTTCTCTCGGGCCACAGCCTTACAGCTGTGGAGCACGGTATC  
+  
FFFFF:FFFFFFFFFFFFFFFFFFFFFFFFFFFFFFFFFFFFFFFFFFFFFFFFFFFFFFFFFFFFFFFFFFFFFFFF,FFFFFFFF  
FFFFFFFFFFFFFFFF:FFFFFFFFFFFFFFFFFFFFFFFFFFFFFFFFFFFFFFFFFFFFFFFFFFFFFFFFFFFFFFFF  
@A00155:342:HHGFNDSXY:1:1337:31403:15702 2:N:0:GAACCTAG+TCCGCATA  
CCTTTTGTAGGACGAACTTACACAACCTCGAAGAGTAACGACGGTTTCGTCCTTGAACGGACTCATCA  
GGGAGCCTACTAGACTCCGACCGTCATGGGGGTTCAAACCCATGCCCCACCACACCGCCTTAGATCAG  
+  
F:F:FFF:FFFFFFFF:FFFFFFFFFFFFFFFFFFFFFFFFFFFFFFFFFFFFFFFF,FFFF:FFFF:FF:FF:FFFFFFFF  
FFFFF:FFFFFFFF:FFFFFFFFFFFFFFFF,FF:F,FFFFFFFF,FFFFFFFFFFFFFFFFFFFFFFFF:FFFF  
@A00155:342:HHGFNDSXY:1:1337:19361:25504 2:N:0:GAACCTAG+TCCGCATA  
ACTACGACTTACACGGTAGGTCGTGAACAAGCCCGGAGTACATCTCCTTTGGAACCAGGAGACCCCTC  
CGGTCTTGTCCAACCTCTGTTTCGGCAGAGGATACCGTGCTCCACAGCTGTAAGGCTGTGGGCCCGAG  
+  
FFFFFFFFFFFFFFFFFFFFFFFF:FFFFF:FFFFFFFFFFFFFFFFFFFFFFFFFFFFFFFFFFFFFFFFFFFFFFFF  
FFFFFFFFFFFFFFFFFFFFFFFFFFFFFFFFFFFFFFFFFFFFFFFFFFFFFFFFFFFFFFFFFFFFFFFF  
@A00155:342:HHGFNDSXY:1:1338:16016:13103 2:N:0:GAACCTAG+TCCGCATA  
CCTACTAGACTACGACTTACACGGTAGGTCGTGAACAAGCCCGGAGTACATCTCCTTTGGAACCAGGA  
GACCCCTCCGGTCTTGTCCAACCTCTGTTTCGGCAGAGGATACCGTGCTCCACAGCTGTAAGGCTGTG  
+

FFFFFFFFFFFFFFFFFFFFFFFFFFFFFFFFFFFFFFFFFFFFFFFFFFFFFFFFFFFFFFFFFFFFFFFF  
FFFFFFFFFFFFFFFFFFFFFFFFFFFFFFFFFFFFFFFFFFFFFFFFFFFFFFFFFFFFFFFFFFFFFFFF, FFFFF, FFFFFFF: FFFFFFF: FFFFFFFF  
@A00155:342:HHGFNDSXY:1:1338:11388:30765 2:N:0:GAACCTAG+TCCGCATA  
GAGACCCCTCCGGTCTTGTCCAACCTCTGTTTCGGCAGAGGATACCGTGCTCCACAGCTGTAAGGCTG  
TGGGCCCCGAGAGAAGTCGCTCTCTCTCGCCCTCCACATCCCTCTCGGCATTGAGATGACCATAGGCCA  
+  
FFFFFFFFFFFFFFFFFFFFFFFFFFFFFFFFFFFFFFFFFFFFFFFFFFFFFFFFFFFFFFFFFFFFFFFF  
FFFFFFFFFFFFFFFFFFFFFFFFFFFFFFFFFFFFFFFFFFFFFFFFFFFFFFFFFFFFFFFFFFFFFFFF, FFFFF  
@A00155:342:HHGFNDSXY:1:1339:19976:7560 2:N:0:GAACCTAG+TCCGCATA  
ACTCTTCGAGTTGTGTAAGTTTCGTCTCTAAAAAGGACTCGTCAGGTAGCCTACTAGACTACGACTTAC  
ACGGTAGGTCTGTAACAAGCCCGGAGTACATCTCCTTTGGAAGTGGAGACCCCTCCGGTCTTGTCCA  
+  
FFFFFFFFF: FFFFFFF: FFFF, FFFFFFFFFFFFFFFFFFFFFFFFFFFFFFFFFFFFFFFFFFFFFFFF  
FFFFFFFFFFFFFFFFFFFFFFFFFFFFFFFFFFFFFFFFFFFFFFFFFFFFFFFFFFFFFFFFFFFFFFFF: FFFFFFFFFFFFFFFFFF  
@A00155:342:HHGFNDSXY:1:1339:23656:8703 2:N:0:GAACCTAG+TCCGCATA  
TTACACGGTAGGTCTGTAACAAGCCCGGAGTACATCTCCTTTGGAAGTGGAGACCCCTCCGGTCTTG  
TCCAACCTCTGTTTCGGCAGAGGATACCGTGCTCCACAGCTGTAAGGCTGTGGGCCCCGAGAGAAGTCG  
+  
FFFFFFFFFFFFFFFFFFFF: FFFFFFFFFFFFFFFFFFFFFFFFFFFFFFFFFFFFFFFFFFFFFFFF, FFFFFFFFFFFFFFFFFFFFF: F  
FFFFFFFFFFFFFFFFFFFFFFFFFFFFFFFFFFFFFFFFFFFFFFFFFFFFFFFFFFFFFFFFFFFFFFFF: FFFF  
@A00155:342:HHGFNDSXY:1:1339:28980:8750 2:N:0:GAACCTAG+TCCGCATA  
AGTACATCTCCTTTGGAAGTGGAGACCCCTCCGGTCTTGTCCAACCTCTGTTTCGGCAGAGGATACC  
GTGCTCCACAGCTGAAAGGCTGTGGGCCCCGAGAGAAGTCGCTCTCTCTCGCCCTCCACATCCCTCTCG  
+  
FFFFFFFFFFFFFFFFFFFFFFFFFFFFFFFFFFFF: FFFFFFFFFFFFFFFFFFFFFFFFFFFFFFFFFFFFFFFF  
FFFFFFFFFFFF: FFFFFFFFFFFFFFFFFFFFFFFFFFFFFFFFFFFFFFFFFFFFFFFF: FFFFFFF: FFF: FFFFF  
@A00155:342:HHGFNDSXY:1:1339:30563:9142 2:N:0:GAACCTAG+TCCGCATA  
AGTACATCTCCTTTGGAAGTGGAGACCCCTCCGGTCTTGTCCAACCTCTGTTTCGGCAGAGGATACC  
GTGCTCCACAGCTGAAAGGCTGTGGGCCCCGAGAGAAGTCGCTCTCTCTCGCCCTCCACATCCCTCTCG  
+  
FF: FFFFFFFFFFFFFFFFFFFFF: FFFFFFFFFFFFFFFFFFFFFFFFFFFFFFFFFFFFFFFF, FFFFF: FFFF: FFF  
: FFFFFFFFFFFFFFFFFFFFF: FFFFFFFFFFFFF: FFFF, FFFFFFFFFFFFFFFFFFFFFFFFFFFFF: FFFFF  
@A00155:342:HHGFNDSXY:1:1339:13557:12727 2:N:0:GAACCTAG+TCCGCATA  
CCATGCCCGCCACACCGCCTTAGATCAGCTGTGTCCACTTAAGGACTCACCTCTGGCCTATGGTCAT  
CTCAATGCCGAGAGGGATGTGGAGGGCGAGAGAGAGCGACTTCTCTCGGGCCCACAGCCTTACAGCTG  
+  
FFFFFFFFFFFFFFFFFFFFFFFFFFFFFFFFFFFFFFFFFFFFFFFFFFFFFFFFFFFFFFFFFFFFFFFF  
FFFFFFFFFFFFFFFFFFFF, FFFFFFFFFFFFFFFFFFFFFFFFFFFFFFFFFFFFFFFFFFFFFFFF: FFFFFFFF  
@A00155:342:HHGFNDSXY:1:1340:23900:9627 2:N:0:GAACCTAG+TCCGCATA  
GTTGTGTAAGTTTCGTCTCTAAAAAGGACTCGTCAGGTAGCCTACTAGACTACGACTTACACGGTAGGT  
CGTGAACAAGCCCGGAGTACATCTCCTTTGGAAGTGGAGACCCCTCCGGTCTTGTCCAACCTCTGTT  
+  
FF: FFFFFFFFFFFFFFFFFFFFF: FFFFFFFFFFFFFFFFFFFFFFFFFFFFFFFFFFFFFFFF  
FFFFFFFFFFFFFFFFFFFFFFFFFFFFFFFFFFFFFFFFFFFFFFFFFFFFFFFFFFFFFFFFFFFF: FFFFFFFF, FFFFFFFFFFFFFFFFFF  
@A00155:342:HHGFNDSXY:1:1340:11758:31469 2:N:0:GAACCTAG+TCCGCATA  
TAGGTCGTGAACAAGCCCGGAGTACATCTCCTTTGGAAGTGGAGACCCCTCCGGTCTTGTCCAACCT  
CTGTTTCGGCAGAGGATACCGTGCTCCACAGCTGTAAGGCTGTGGGCCCCGAGAGAAGTCGCTCTCTCT  
+  
FFFFFFFFFFFFFFFFFFFFFFFFFFFFFFFFFFFF: FFFFFFFF, FFFFFFFFFFFFFFFFFFFFFFFFFFFFF  
FFFFFFFFFF: : FFFFFFFFFFFFFFFFFFFFFFFFFFFFFFFFFFFFFFFFFFFFFFFFFFFFFFFFFFFFF  
@A00155:342:HHGFNDSXY:1:1341:17427:7216 2:N:0:GAACCTAG+TCCGCATA  
AGTACATCTCCTTTGGAAGTGGAGACCCCTCCGGTCTTGTCCAACCTCTGTTTCGGCAGAGGATACC  
GTGCTCCACAGCTGTAAGGCTGTGGGCCCCGAGAGAAGTCGCTCTCTCTCGCCCTCTACATCCCTCTCG  
+

FFFFFFFFFFFFFFFFFFFFFFFFFFFFFFFFFFFFFFFFFFFFF:FFFFFFFFFFFFFFFFFFFFFFFFFFFFFFFFFFFFFFFFFFFFFF  
FFFFFFFFFFFFFFFFFFFFFFFFFFFFFFFFFFFFFFFFFFFFFFFFFFFFFFFFFFFFFFFFFFFFFFFFFFFFFFFFFFFFFFFFFFFFFFF  
@A00155:342:HHGFNDSXY:1:1341:3134:22388 2:N:0:GAACCTAG+TCCGCATA  
GAGACCCCTCCGGTCTTGCCAACCTCTGTTCGGCAGAGGATACCGTGCTCCACAGCTGTAAGGCTG  
TGGGCCCGAGAGAAGTCGCTCTCTCTCGCCCTCTACATCCCTCTCGGCATTGAGATGACCATAG  
+  
FFFFFFFFFFFFFFFFFFFFFFFFFFFFFFFFFFFFFFFFFFFFFFFFFFFFFFFFFFFFFFFFFFFFFFFFFFFFFFFFFFFFFFFFFFFFFF:  
FFFFFFFFFFFFFFFFFFFFFFFFFFFFFFFFFFFFFFFFFFFFFFFFFFFFFFFFFFFFFFFFFFFFFFFFFFFFFFFFFFFFFFFFFFFFFF:  
FF  
@A00155:342:HHGFNDSXY:1:1341:29279:23547 2:N:0:GAACCTAG+TCCGCATA  
ACCGTGCTCCACAGCTGTAAGGCTGTGGGCCCGAGAGAAGTCGCTCTCTCTCGCCCTCCACATCCCTO  
TCGGCATTGAGATGACCATAGGCCAGAGGTGAGTCCTTAAGTTGACACAGCTGATCTAAGGCGGTGTG  
+  
FFFFFFFFFFFFFFFFFFFFFFFFFFFFFFFFFFFFFFFFFFFFFFFFFFFFFFFFFFFFFFFFFFFFFFFFFFFFFFFFFFFFFFFFFFFFFF:  
FFFFFFFFFFFFFFFFFFFFFFFFFFFFFFFFFFFFFFFFFFFFFFFFFFFFFFFFFFFFFFFFFFFFFFFFFFFFFFFFFFFFFFFFFFFFFF:  
FF  
@A00155:342:HHGFNDSXY:1:1341:17662:26036 2:N:0:GAACCTAG+TCCGCATA  
TTTAGGACGAAACTTACACA ACTCGAAGAGTAACGACGGTTTTCGTCCTTGAACGGACTCATCAGGGA  
GCCTACTAGACTCCGACCGTCATGGGGGTTCAAACCCATGCCCCACCACACCGCCTTAGATCAGCTGT  
+  
FFFFFFFFFFFFFFFFFFFFFFFFFFFFFFFFFFFFFFFFFFFFFFFFFFFFFFFFFFFFFFFFFFFFFFFFFFFFFFFFFFFFFFFFFFFFFF:  
FFFFFFFFFFFFFFFFFFFFFFFFFFFFFFFFFFFFFFFFFFFFFFFFFFFFFFFFFFFFFFFFFFFFFFFFFFFFFFFFFFFFFFFFFFFFFF,  
FFFFFFFFFFFFFFFFFFFFFFFFFFFFFFFFFFFFFFFFFFFFFFFFFFFFFFFFFFFFFFFFFFFFFFFFFFFFFFFFFFFFFFFFFFFFFF:  
FFFFF  
@A00155:342:HHGFNDSXY:1:1341:18602:29575 2:N:0:GAACCTAG+TCCGCATA  
TTTAGGACGAAACTTACACA ACTCGAAGAGTAACGACGGTTTTCGTCCTTGAACGGACTCATCAGGGA  
GCCTACTAGACTCCGACCGTCATGGGGGTTCAAACCCATGCCCCACCACACCGCCTTAGATCAGCTGT  
+  
FFFFFFFFF:FFFFFFFFFFFFFFFFFFFFFFFFFFFFFFFFFFFFFFFFFFFFFFFFFFFFFFFFFFFFFFFFFFFFFFFFFFFFFFFFFFFFFF,  
FFFFFFFFFFFFFFFFFFFFFFFFFFFFFFFFFFFFFFFFFFFFFFFFFFFFFFFFFFFFFFFFFFFFFFFFFFFFFFFFFFFFFFFFFFFFFF:  
FFFFFFFFFFFFFFFFFFFFFFFFFFFFFFFFFFFFFFFFFFFFFFFFFFFFFFFFFFFFFFFFFFFFFFFFFFFFFFFFFFFFFFFFFFFFFF:  
FF  
@A00155:342:HHGFNDSXY:1:1341:21630:30342 2:N:0:GAACCTAG+TCCGCATA  
TAGGAGACCCCTCCGGTCTTGCCAACCTCTGTTTCGGCAGAGGATACCGTGCTCCACAGCTGTAAGG  
CTGTGGGCCCGAGAGAAGTCGCTCTCTCTCGCCCTCCACATCCCTCTCGGCATTGAGATGACCATAGG  
+  
FFFFFFFFFFFFFFFFFFFFFFFFFFFFFFFFFFFFFFFFFFFFFFFFFFFFFFFFFFFFFFFFFFFFFFFFFFFFFFFFFFFFFFFFFFFFFF:  
FFFFFFFFFFFFFFFFFFFFFFFFFFFFFFFFFFFFFFFFFFFFFFFFFFFFFFFFFFFFFFFFFFFFFFFFFFFFFFFFFFFFFFFFFFFFFF,  
:FF  
@A00155:342:HHGFNDSXY:1:1342:21287:9799 2:N:0:GAACCTAG+TCCGCATA  
ACTAGGAGACCCCTCCGGTCTTGCCAACCTCTGTTTCGGCAGAGGATACCGTGCTCCACAGCTGTAA  
GGCTGTGGGCCCGAGAGAAGTCGCTCTCTCTCGCCCTCCACATCCCTCTCGGCATTGAGATGAC  
+  
FFFFFFFFFFFFFFFFFFFFFFFFFFFFFFFFFFFFFFFFFFFFFFFFFFFFFFFFFFFFFFFFFFFFFFFFFFFFFFFFFFFFFFFFFFFFFF:  
FFFFFFFFFFFFFFFFFFFFFFFFFFFFFFFFFFFFFFFFFFFFFFFFFFFFFFFFFFFFFFFFFFFFFFFFFFFFFFFFFFFFFFFFFFFFFF,  
FFFFFFFFFFFFFFFFFFFFFFFFFFFFFFFFFFFFFFFFFFFFFFFFFFFFFFFFFFFFFFFFFFFFFFFFFFFFFFFFFFFFFFFFFFFFFF:  
FFFFF  
@A00155:342:HHGFNDSXY:1:1342:16342:10817 2:N:0:GAACCTAG+TCCGCATA  
GAAGCTGTGGGCCCGAGAGAAGTCGCTCTCTCTCGCCCTCCACATCCCTCTCGGCATTGAGATGAC  
+  
FFFFFFFFFFFFFFFFF:FFFFFFFFFFFFFFFFFFFFFFFFFFFFFFFFFFFFFFFFFFFFFFFFFFFFFFFFFFFFFFFFFFFFFFFFFFFFFFF  
FFFFFFFFFFFFFFFFFFFFFFFFFFFFFFFFFFFFFFFFFFFFFFFFFFFFFFFFFFFFFFFFFFFFFFFFFFFFFFFFFFFFFFFFFFFFFF,  
FFFFFFFFFFFFFFFFFFFFFFFFFFFFFFFFFFFFFFFFFFFFFFFFFFFFFFFFFFFFFFFFFFFFFFFFFFFFFFFFFFFFFFFFFFFFFF:  
FFF  
@A00155:342:HHGFNDSXY:1:1342:22299:12868 2:N:0:GAACCTAG+TCCGCATA  
CGTTACTCTTCGAGTTGTGTAAGTTTCGTCCTAAAAAGGACTCGTCAGGTAGCCTACTAGACTACGAC  
TTACACGGTAGGTCTGTAACAAGCCC GGAGTACATCTCCTTTGGAAGT AGGAGACCCCTCCGGTCTTG  
+  
FFFFFFFFF:FFFFFFFFFFFFFFFFF:FFFF:FFFFF,FFFFFFFFFFFFFFFFFFFFFFFFFFFFFFFFFFFFFFFFFFFFFFFFFFFFFFF  
FFFFFFFFFFFFFFFFF,FFFFFFFFFFFFFFFFFFFFFFFFFFFFFFFFFFFFFFFFFFFFFFFFFFFFFFFFFFFFFFFFFFFFFFFFFFFFFF:  
FFFFFFFFF::FFFFFF:FFFFFFFFF  
@A00155:342:HHGFNDSXY:1:1342:28149:13604 2:N:0:GAACCTAG+TCCGCATA  
AAACTTACACA ACTCAAAGAGTAACGACGGTTTTCGTCCTTGAACGGACTCATCAGGGAGCCTACTAG  
ACTCCGACCGTCATGGGGGTTCAAACCCATGCCCCGCCACACCGCCTTAGATCAGCTGTGTCCACTTA

+  
+

```

FFFFFFFFFFFFFFFFFFFFFFFFFFFFFFFFFFFFFFFFFFFFFFFFFFFFFFFFFFFFFFFFFFFFF:F:FFFFFFFF,FF:FFFFFFFF
FFFFFFFFFFFFFF:FFFFFF,FFFFFFFFFFFFFFFFFFFFFFFFFFFFFFFFFFFFFFFFFFFFFFFFFFFFFFFFFFFFFFFFFFFFF
@A00155:342:HHGFNDSXY:1:1342:2293:18114 2:N:0:GAACCTAG+TCCGCATA
TACACGGTAGGTCGTGAACAAGCCCGGAGTACATCTCCTTTGGAACCAGGAGACCCCTCCGGTCTTGT
CCAACCTCTGTTTCGGCAGAGGATACCGTGCTCCACAGCTGTAAGGCTGTGGGCCCGAGAGAAGTCGC
+
FFFFFFFFFFFFFFFFFFFFFFFFFFFFFFFFFFFFFFFFFFFFFFFFFFFFFFFFFFFFFFFFFFFFF
FFFFFFFFFFFFFFFFFFFFFFFFFFFFFFFFFFFFFFFFFFFFFFFFFFFFFFFFFFFFFFFFFFFFF:FFFFFFFFFFFFFFFF
@A00155:342:HHGFNDSXY:1:1342:8278:20055 2:N:0:GAACCTAG+TCCGCATA
ACTCGTCAGGTAGCCTACTAGACTACGACTTACACGGTAGGTCGTGAACAAGCCCGGAGTACATCTCC
TTTGAAGTAGGAGACCCCTCCGGTCTTGTCCAACCTCTGTTTCGGCAGAGGATACCGTGCTCCACAG
+
FFF,FFFFFFFF,FFFFFFFFFFFFFFFFFFFFFFFFFFFFFFFFFFFFFFFFFFFFFFFFFFFFFFFF
FFFFFFFFFFFFFFFFFFFFFFFFFFFFFFFFFFFFFFFFFFFFFFFFFFFFFFFFFFFFFFFFFFFFF:FF:FFFFFFF
@A00155:342:HHGFNDSXY:1:1342:13286:24220 2:N:0:GAACCTAG+TCCGCATA
GGACTCTCCTCTGGCCTATGGTCATCTCAATGCCGAGAGGGATGTGGAGGGCGAGAGAGAGCGACTTC
TCTCGGGCCCACAGCCTTACAGCTGTGGAGCACGGTATCCTCTGCCGAAACAGAGGTTGACAAGACC
+
FFFFFFFFFFFFFFFFFFFFFFFFFFFFFFFFFFFFFFFFFFFFFFFFFFFFFFFFFFFFFFFFFFFFF
FFFFFFFFFFFFFFFFFFFFFFFFFFFFFFFFFFFFFFFFFFFFFFFFFFFFFFFFFFFFFFFFFFFFF:FF:FFFFFFF
@A00155:342:HHGFNDSXY:1:1343:12481:17973 2:N:0:GAACCTAG+TCCGCATA
ACATCTCCTTTGGAAGTAGGAGACCCCTCCGGTCTTGTCCAACCTCTGTTTCGGCAGAGGATACCGTG
CTCCACAGCTGTAAGGCTGTGGGCCCGAGAGAAGTCGCTCTCTCTCGCCCTCCACATCCCTCTCGGCA
+
FFFFFFFFFFFF:FFFFFFFFFFFFFFFFFFFFFFFFFFFFFFFFFFFFFFFFFFFFFFFFFFFFFFFFFFFF
FFFFFFFFFFFFFFFFFFFFFFFFFFFFFFFFFFFFFFFFFFFFFFFFFFFFFFFFFFFFFFFFFFFFF:FFFFFFFF
@A00155:342:HHGFNDSXY:1:1343:11831:18912 2:N:0:GAACCTAG+TCCGCATA
ACATCTCCTTTGGAAGTAGGAGACCCCTCCGGTCTTGTCCAACCTCTGTTTCGGCAGAGGATACCGTG
CTCCACAGCTGTAAGGCTGTGGGCCCGAGAGAAGTCGCTCTCTCTCGCCCTCCACATCCCTCTCGGCA
+
FFFFFFFFFFFFFFFFFFFFFFFFFFFFFFFFFFFFFFFFFFFFFFFFFFFFFFFFFFFFFFFFFFFFF
FFFFFFFFFFFFFFFFFFFFFFFFFFFFFFFFFFFFFFFFFFFFFFFFFFFFFFFFFFFFFFFFFFFFF:FFFFFFFF
@A00155:342:HHGFNDSXY:1:1344:30020:12743 2:N:0:GAACCTAG+TCCGCATA
GTGTAAGTTTCGTCCTAAAAAGGACTCGTCAGGTAGCCTACTAGACTACGACTTACACGGTAGGTCGT
GAACAAGCCCGGAGTACATCTCCTTTGGAAGTAGGAGACCCCTCCGGTCTTGTCCAACCTCTGTTTCG
+
FFFFFFFFFFFFFFFFFFFFFFFFFFFFFFFFFFFFFFFFFFFFFFFFFFFFFFFFFFFFFFFFFFFFF
FFFFFFFFFFFFFFFFFFFFFFFFFFFFFFFFFFFFFFFFFFFFFFFFFFFFFFFFFFFFFFFFFFFFF:FFFFFFFF
:FFFFFFFFFFFFFFFFFFFFFFFFFFFFFFFFFFFFFFFFFFFFFFFFFFFFFFFFFFFFFFFFFFFFF:FFFF:FFFF
@A00155:342:HHGFNDSXY:1:1345:18548:3490 2:N:0:GAACCTAG+TCCGCATA
GACCGTCATGGGGGTTCAAACCATGCCCGCCACACCGCCTTAGATCAGCTGTGTCCACTTAAGGAC
TCACCTCTGGCCTATGGTCATCTCAATGCCGAGAGGGATGTGGAGGGCGAGAGAGAGCGACTTCTCTC
+
FFFFFFFFFFFFFFFFFFFFFFFFFFFFFFFFFFFFFFFFFFFFFFFFFFFFFFFFFFFFFFFFFFFFF
FFFFF:FFFFFFFFFFFFFFFFFFFFFFFFFFFFFFFFFFFFFFFFFFFFFFFFFFFFFFFFFFFFFFFFFFFFF,FFFF
@A00155:342:HHGFNDSXY:1:1345:3748:4946 2:N:0:GAACCTAG+TCCGCATA
CCGTTCCAAGGACGAAACCGTCGTTACTCTACGAGTTGTGTAAGTTTCGTCCTAAAAAGGACTCGTCA
GGTAGCCTACTAGACTACGACTTACACGGTAGGTCGTGAACAAGCCCGGAGTACATCTCCTTTGGAA
+
FFFFFFFFFFFFFFFFFFFFFFFFFFFFFFFFFFFFFFFFFFFFFFFFFFFFFFFFFFFFFFFFFFFFF
FFFF:FFFFFFFFFFFFFFFFFFFFFFFFFFFFFFFFFFFFFFFFFFFFFFFFFFFFFFFFFFFFFFFFFFFFF,FFFF
@A00155:342:HHGFNDSXY:1:1345:3640:4977 2:N:0:GAACCTAG+TCCGCATA
CCGTTCCAAGGACGAAACCGTCGTTACTCTACGAGTTGTGTAAGTTTCGTCCTAAAAAGGACTCGTCA
GGTAGCCTACTAGACTACGACTTACACGGTAGGTCGTGAACAAGCCCGGAGTACATCTCCTTTGGAA
+

```

FFFFFFFFFFFFFFFFFFFFFFFFFFFFFFFFFFFFFFFFFFFFFFFFFFFFFFFFFFFFFFFFFFFFFFFF  
FFFFFFFFFFFFFFFFFFFFFFFFFFFFFFFFFFFFFFFFFFFFFFFFFFFFFFFFFFFFFFFFFFFFFFFF  
@A00155:342:HHGFNDSXY:1:1345:23529:27618 2:N:0:GAACCTAG+TCCGCATA  
ACCCCTCCGGTCTTGTCCAACCTCTGTTTCGGCAGAGGATACCGTGCTCCACAGCTGTAAGGCTGTGG  
GCCCGAGAGAAGTCGCTCTCTCTCGCCCTCCACATCCCTCTCGGCATTGAGATGACCATAGGCCAGAG  
+  
FFFFFFFFFFFFFF:FFFFFFFFFFFFFFFFFFFFFFFFFFFFFFFFFFFFFFFFFFFFFFFFFFFFFFFF  
FFFFFFFFFFFFFFFFFFFFFFFFFFFFFFFFFFFFFFFFFFFFFFFFFFFFFFFFFFFFFFFFFFFFFFF,FFFFFFFFFFFFFF:FFFFFFFF  
@A00155:342:HHGFNDSXY:1:1345:24288:28307 2:N:0:GAACCTAG+TCCGCATA  
GTGAACAAGCCCGGAGTACATCTCCTTTGGAAGTACCGAGACCCCTCCGGTCTTGTCCAACCTCTGTTT  
CGGCAGAGGATACCGTGCTCCACAGCTGTAAGGCTGTGGGCCCGAGAGAAGTCGCTCTCTCTCGCCCT  
+  
FFFFFFFFF:FFFFFFFFFFFFFFFFF:FFFFFFFFFFFFFFFFFFFFFFFFFFFFFFFFF,FFFFFFFFFFFFFFFF  
FFFFFFFFFFFFFFFFFFFFFFFFFFFFFFFFFFFFFFFFFFFFFFFFFFFFFFFFFFFFFFFFFFFFFFF:FFFFFFFFFFFFFFFFFFFFFFFF  
@A00155:342:HHGFNDSXY:1:1345:22028:32440 2:N:0:GAACCTAG+TCCGCATA  
GTGAACAAGCCCGGAGTACATCTCCTTTGGAAGTACCGAGACCCCTCCGGTCTTGTCCAACCTCTGTTT  
CGGCAGAGGATACCGTGCTCCACAGCTGTAAGGCTGTGGGCCCGAGAGAAGTCGCTCTCTCTCGCCCT  
+  
FFFFFFFFFFFFFFFFFFFFFFFFFFFFFFFFFFFFFFFFFFFFFFFFFFFFFFFFFFFFFFFFFFFFFFFF  
FFFFFFFFFFFFFFFFFFFFFFFFFFFFFFFFFFFFFFFFFFFFFFFFFFFFFFFFFFFFFFFFFFFFFFF:FFFFFFFFFFFFFFFFFFFFFFFF  
@A00155:342:HHGFNDSXY:1:1345:12156:36354 2:N:0:GAACCTAG+TCCGCATA  
GGAGTACATCTCCTTTGGAAGTACCGAGACCCCTCCGGTCTTGTCCAACCTCTGTTTCGGCAGAGGATA  
CCGTGCTCCACAGCTGTAAGGCTGTGGGCCCGAGAGAAGTCGCTCTCTCTCGCCCTCCACATCCCTCT  
+  
FFFFFFFFFFFFFFFFFFFFFFFFFFFFFFFFFFFFFFFFFFFFFFFFFFFFFFFFFFFFFFFFFFFFFFFF  
FFF:FFFFFFFFFFFFFFFFFFFFFFFFFFFFFFFFFFFFFFFFFFFFFFFFFFFFFFFFFFFFFFFFFFFFFFF  
@A00155:342:HHGFNDSXY:1:1346:19949:4664 2:N:0:GAACCTAG+TCCGCATA  
ACCTCTGTTTCGGCAGAGGATACCGTGCTCCACAGCTGTAAGGCTGTGGGCCCGAGAGAAGTCGCTCT  
CTCTCGCCCTCTACATCCCTCTCGGCATTGAGATGACCATAGGCCAGAGGTGAGTCCTTAAGTGGACA  
+  
FFFFFFFFFFFFFFFFFFFFFFFFFFFFFFFFFFFFFFFFFFFFFFFFFFFFFFFFFFFFFFFFFFFFFFFF  
FFFFFFFFFFFFFFFFFFFFFFFFFFFFFFFFFFFFFFFFFFFFFFFFFFFFFFFFFFFFFFFFFFFFFFF:FFFFFFFFFFFFFFFFF,FFFFFFFF  
@A00155:342:HHGFNDSXY:1:1346:14552:22216 2:N:0:GAACCTAG+TCCGCATA  
GGTCGTGAACAAGCCCGGAGTACATCTCCTTTGGAAGTACCGAGACCCCTCCGGTCTTGTCCAACCTCT  
GTTTCGGCAGAGGATACCGTGCTCCACAGCTGTAAGGCTGTGGGCCCGAGAGAAGTCGCTCTCTCTCG  
+  
FFFFFFFFFFFFFFFFFFFFFFFFFFFFFFFFFFFFFFFFFFFFFFFFFFFFFFFFFFFFFFFFFFFFFFFF  
FFFFFFFFFFFFFFFFFFFFFFFFFFFFFFFFFFFFFFFFFFFFFFFFFFFFFFFFFFFFFFFFFFFFFFF,FFFFFFFFFFFFFF  
@A00155:342:HHGFNDSXY:1:1346:9977:30671 2:N:0:GAACCTAG+TCCGCATA  
TTTCGTCCTAAAAAGGACTCGTCAGGTAGCCTACTAGACTACGACTTACACGGTAGGTCGTGAACAAG  
CCCGGAGTACATCTCCTTTGGAACCAGGAGACCCCTCCGGTCTTGTCCAACCTCTGTTTCGGCAGAGG  
+  
FFFFFFFFFFFFFFFFFFFFFFFFFFFFFFFFFFFFFFFFFFFFFFFFFFFFFFFFFFFFFFFFFFFFFFF:FFFFFFFFFFFFFFFFFFFFFF  
FFFFFFFFFFFFFFFFFFFFFFFFFFFFFFF:FFFFFFFFFFFFFFFFF,FFFFFFFFFFFFFFFFFFFFFFFFFFFFFFFFFFFFFFFF  
@A00155:342:HHGFNDSXY:1:1347:22055:24345 2:N:0:GAACCTAG+TCCGCATA  
GAAACCGTCGTTACTCTTCGAGTTGTGTAAGTTTCGTCCTAAAAAGGACTCGTCAGGTAGCCTACTAG  
ACTACGACTTACACGGTAGGTCGTGAACAAGCCCGGAGTACATCTCCTTTGGAAGTACCGAGACCCCTC  
+  
FFFFFFFFFFFFFFFFFFFFFFFFFFFFFFFFFFFFFFFFF:F::FFFFFFFF,FFFFFFFFFFFFFFFFF,FFFFFFFFFFFF  
FFF:FFFFFFFFFFFFF:,FFF:FFFFF:FFF::FFFFFFFFFFFFFFFFF:FFFFFFFFFFFFFFFFF:FFFF  
@A00155:342:HHGFNDSXY:1:1347:28004:28573 2:N:0:GAACCTAG+TCCGCATA  
GAAACCGTCGTTACTCTTGAGTTGTGTAAGTTTCGTCCTAAAAAGGACTCGTCAGGTAGCCTACTAG  
ACTACGACTTACACGGTAGGTCGTGAACAAGCCCGGAGTACATCTCCTTTGGAAGTACCGAGACCCCTC  
+

FFFFFFFFFFFFFFFFF:,FFFFFFFFFFFFFFFFF:FFFFFFFFF,FFFFFFFFFFFFFFFFFFFFFFFFF  
FFFFFFFFFFFFFFFFFFFFFFFFFFFFFFFFF,FFFFFFFFFFFFFFFFFFFFFFFFF:FFFFFFFFFFFFFFFFFFFFFFFFF  
@A00155:342:HHGFNDSXY:1:1348:17716:8531 2:N:0:GAACCTAG+TCCGCATA  
TGGAACTAGGAGACCCCTCCGGTCTTGTCCAACCTCTGTTTCGGCAGAGGATACCGTGCTCCACAGCT  
GTAAGGCTGTGGGCCCCGAGAGAAGTCGCTCTCTCTCGCCCTCCACATCCCTCTCGGCATTGAGATGAC  
+  
FFFFFFFFFFFFFFFFFFFFFFFFFFFFFFFFFFFFFFFFFFFFFFFFFFFFFFFFFFFFFFFFFFFFFFFFF  
FFFFFFF:FFFFFFFFFFFFFFFFF,FFFFFFFFFFFF:FFFFFFFFFFFFFFFFFFFFFFFFFFFFFFFFF  
@A00155:342:HHGFNDSXY:1:1348:12228:18035 2:N:0:GAACCTAG+TCCGCATA  
CTTTTtaggacgaaacttacacaactcaaagagtaacgacggtttcgtccttggaacggactcatcag  
ggagcctactagactccgaccgtcatgggggttcaaaccatgccccgccacaccgccttagatcagc  
+  
FFFFFFFFFFFFFFFFFFFFFFFFFFFFFFFFFFFFFFFFFFFFFFFFFFFFFFFFFFFFFFFFFFFFFFFFF  
FFFFFFFFFFFFFFFFFFFFFFFFFFFFFFFFF:FFFFFFFFFFFFFFFFFFFFFFFFFFFFFFFFF  
@A00155:342:HHGFNDSXY:1:1348:22616:25504 2:N:0:GAACCTAG+TCCGCATA  
ACTCTTTGAGTTGTGTAAGTTTCGTCTAAAAAGGACTCGTCAGGTAGCCTACTAGACTACGACTTAC  
ACGGTAGGTCGTGAACAAGCCCGGAGTACATCTCCTTTGGAAGTtaggagacccctccggcttGTCCA  
+  
FFFF:FFFFFFFFF,FFFF:FFFFFF,F,FFFFFFFFF:FFFFFFFFFFFFFFFFFFFFFFFFFFFFF  
FFFFFFFFFFFFFFFFFFFFFFFFFFFFFFFFFFFFFFFFFFFFFFFFFFFFFFFFFFFFFFFFFFFFF:FFFF,FFFFFFFFF  
@A00155:342:HHGFNDSXY:1:1348:22544:25567 2:N:0:GAACCTAG+TCCGCATA  
ACTCTTTGAGTTGTGTAAGTTTCGTCTAAAAAGGACTCGTCAGGTAGCCTACTAGACTACGACTTAC  
ACGGTAGGTCGTGAACAAGCCCGGAGTACATCTCCTTTGGAAGTtaggagacccctccggcttGTCCA  
+  
FFFFFF:FFFFFFFFFFFFF,FFFFFFFFFFFFFFFFFFFFFFFFFFFFFFFFFFFFFFFFFFFFFFFFFFFFF  
FFFFF:FFFFFFFFFFFFFFFFFFFFFFFFFFFFFFFFF:FFFFFFFFF:FFFFFFFFFFFFF:FF  
@A00155:342:HHGFNDSXY:1:1350:28293:14137 2:N:0:GAACCTAG+TCCGCATA  
CCACACCGCCTTAGATCAGCTGTGTCCACTTAAGGACTCACCTCTGGCCTATGGTCATCTCAATGCCG  
AGAGGGATGTGGAGGGCGAGAGAGAGCGACTTCTCTCGGGCCACAGCCTTACAGCTGTGGAGCACGG  
+  
FFFFFFFFFFFFFFFFFFFFFFFFFFFFFFFFFFFFFFFFFFFFFFFFFFFFFFFFFFFFFFFFFFFFFFFFF  
FFFFFFF,FFFFFFFFFFFFFFFFFFFFFFFFFFFFFFFFFFFFFFFFFFFFFFFFFFFFFFFFFFFFF,FFFFFFFFFFFFFFFFF  
@A00155:342:HHGFNDSXY:1:1350:11406:20149 2:N:0:GAACCTAG+TCCGCATA  
GATCAGCTGTGTCCACTTAAGGACTCACCTCTGGCCTATGGTCATCTCAATGCCGAGAGGGATGTGGA  
GGGCGAGAGAGAGCGACTTCTCTCGGGCCACAGCCTTACAGCTGTGGAGCACGGTATCCTCTGCCGA  
+  
FFFFFFFFFFFFFFFFFFFFFFFFFFFFFFFFFFFFFFFFFFFFFFFFFFFFFFFFFFFFFFFFFFFFFFFFF  
FFFFFFFFFFFFFFFFFFFFFFFFFFFFFFFFFFFFFFFFF:FFFFFFFFFFFFFFFFFFFFFFFFFFFFF  
@A00155:342:HHGFNDSXY:1:1350:25916:28432 2:N:0:GAACCTAG+TCCGCATA  
CCTTTGGAAGTtaggagacccctccggcttGTCCAACCTCTGTTTCGGCAGAGGATACCGTGCTCCAC  
AGCTGTAAGGCTGTGGGCCCCGAGAGAAGTCGCTCTCTCTCGCCCTCCACATCCCTCTCGGCATTGAGA  
+  
FFFFFFFFFFFFFFFFFFFFFFFFFFFFFFFFFFFFFFFFFFFFFFFFFFFFFFFFFFFFFFFFFFFFF:FFFFFFFFFFFFFFFFF  
FFFFFFFFFFFFFFFFFFFFFFFFFFFFFFFFFFFFFFFFFFFFFFFFFFFFFFFFFFFFFFFFFFFFFFFFF  
@A00155:342:HHGFNDSXY:1:1350:17987:36432 2:N:0:GAACCTAG+TCCGCATA  
CCGGAGTACATCTCCTTTGGAAGTtaggagacccctccggcttGTCCAACCTCTGTTTCGGCAGAGGA  
TACCGTGCTCCACAGCTGTAAGGCTGTGGGCCCCGAGAGAAGTCGCTCTCTCTCGCCCTCCACATCCCT  
+  
FFFFFFFFFFFFFFFFFFFFFFFFFFFFFFFFFFFFFFFFFFFFFFFFFFFFFFFFFFFFFFFFFFFFF:FFFFFFFFFFFFFFFFF  
FFFFFFFFFFFFFFFFFFFFFFFFFFFFFFFFFFFFFFFFFFFFFFFFFFFFFFFFFFFFFFFFFFFFFFFFF  
@A00155:342:HHGFNDSXY:1:1351:10854:9048 2:N:0:GAACCTAG+TCCGCATA  
TACGACTTACACGGTAGGTCGTGAACAAGCCCGGAGTACATCTCCTTTGGAAGTtaggagacccctccg  
GTCTTGTCCAACCTCTGTTTCGGCAGAGGATACCGTGCTCCACAGCTGTAAGGCTGTGGGCCCCG  
+

FFFFFFFFFFFFFFFFFFFFFFFFFFFFFFFFFFFFFFFFFFFFFFFFFFFFFFFFFFFFFFFFFFFFFFFFFFFFFFFFFFFFFFFFFFFFFFFFFFFFF  
FFFFFFFFFFFFFFFFFFFFFFFFFFFFFFFFFFFFFFFFFFFFFFFFFFFFFFFFFFFFFFFFFFFFFFFFFFFFFFFFFFFFFFFFFFFFFFFFFFFFF  
@A00155:342:HHGFNDSXY:1:1351:9751:15468 2:N:0:GAACCTAG+TCCGCATA  
AGGTAGCCTACTAGACTACGACTTACACGGTAGGTCGTGAACAAGCACGGAGTACATCTCCTTTTGAA  
CTAGGAGACCCCTCCGGTCTTGTCCAACCTCTGTTTCGGCAGAGGATACCGTGCTCCACAGC  
+  
:FFFFFFFFFFFFFFFFFFFFFFFFFFFFFFFFFFFFFFFFFFFFFFFFFFFFFFFFFFFFFFFFFFFFFFFFFFFFFFFFFFFFFFFFFFFFFF:  
FFFFFFFFFFFFFFFFFFFFFFFFFFFFFFFFFFFFFFFFFFFFFFFFFFFFFFFFFFFFFFFFFFFFFFFFFFFFFFFFFFFFFFFFFFFFFF:  
@A00155:342:HHGFNDSXY:1:1351:17852:26428 2:N:0:GAACCTAG+TCCGCATA  
AAAAGGACTCGTCAGGTAGCCTACTAGACTACGACTTACACGGTAGGTCGTGAACAAGCCCGGAGTAC  
ATCTCCTTTTGACCTAGGAGACCCCTCCGGTCTTGTCCAACCTCTGTTTCGGCAGAGGATACCGTGCT  
+  
FFFFFFFFFFFFFFFFFFFFFFFFFFFFFFFFFFFFFFFFFFFFFFFFFFFFFFFFFFFFFFFFFFFFFFFFFFFFFFFFFFFFFFFFFFFFFF:  
FFFFFFFFFFFFFFFFFFFFFFFFFFFFFFFFFFFFFFFFFFFFFFFFFFFFFFFFFFFFFFFFFFFFFFFFFFFFFFFFFFFFFFFFFFFFFF:  
@A00155:342:HHGFNDSXY:1:1351:7301:31234 2:N:0:GAACCTAG+TCCGCATA  
TCGAAGAGTAACGACGGTTTTCGTCCTTGAACGGACTCATCAGGGAGCCTACTAGACTCCGACCGTCA  
TGGGGGTTCAAACCCATGCCCGCTACACCGCCTTAGATCAGCTGTGTCCACTTAAGGACTCACCTCT  
+  
FFFFFFFFFFFFFFFFFFFFFFFFFFFFFFFFFFFFFFFFFFFFFFFFFFFFFFFFFFFFFFFFFFFFFFFFFFFFFFFFFFFFFFFFFFFFFF:  
FFFFFFFFFFFFFFFFFFFFFFFFFFFFFFFFFFFFFFFFFFFFFFFFFFFFFFFFFFFFFFFFFFFFFFFFFFFFFFFFFFFFFFFFFFFFFF:  
@A00155:342:HHGFNDSXY:1:1351:26096:33035 2:N:0:GAACCTAG+TCCGCATA  
TAGACTACGACTTACACGGTAGGTCGTGAACAAGCCCGGAGTACATCTCCTTTGGAAGTACCAGGAGCCC  
CTCCGGTCTTGTCCAACCTCTGTTTCGGCAGAGGATACCGTGCTCCACAGCTGTAAGGCTGTGGGCC  
+  
FFFFFFFFFFFFFFFFFFFFFFFFFFFFFFFFFFFFFFFFFFFFFFFFFFFFFFFFFFFFFFFFFFFFFFFFFFFFFFFFFFFFFFFFFFFFFF:  
FFFFFFFFFFFFFFFFFFFFFFFFFFFFFFFFFFFFFFFFFFFFFFFFFFFFFFFFFFFFFFFFFFFFFFFFFFFFFFFFFFFFFFFFFFFFFF:  
@A00155:342:HHGFNDSXY:1:1352:24569:4586 2:N:0:GAACCTAG+TCCGCATA  
AAAAGGACTCGTCAGGTAGCCTACTAGACTACGACTTACACGGTAGGTCGTGAACAAGCCCGGAGTAC  
ATCTCCTTTGGAAGTACCAGGAGACCCCTCCGGTCTTGTCCAACCTCTGTTTCGGCAGAGGATACCGTGCT  
+  
FFFFFFFFFFFFFFFFFFFFFFFFFFFFFFFFFFFFFFFFFFFFFFFFFFFFFFFFFFFFFFFFFFFFFFFFFFFFFFFFFFFFFFFFFFFFFF:  
FFFFFFFFFFFFFFFFFFFFFFFFFFFFFFFFFFFFFFFFFFFFFFFFFFFFFFFFFFFFFFFFFFFFFFFFFFFFFFFFFFFFFFFFFFFFFF:  
@A00155:342:HHGFNDSXY:1:1352:24505:4726 2:N:0:GAACCTAG+TCCGCATA  
AAAAGGACTCGTCAGGTAGCCTACTAGACTACGACTTACACGGTAGGTCGTGAACAAGCCCGGAGTAC  
ATCTCCTTTGGAAGTACCAGGAGACCCCTCCGGTCTTGTCCAACCTCTGTTTCGGCAGAGGATACCGTGCT  
+  
FFFFFFFFFFFFFFFFFFFFFFFFFFFFFFFFFFFFFFFFFFFFFFFFFFFFFFFFFFFFFFFFFFFFFFFFFFFFFFFFFFFFFFFFFFFFFF:  
FFFFFFFFFFFFFFFFFFFFFFFFFFFFFFFFFFFFFFFFFFFFFFFFFFFFFFFFFFFFFFFFFFFFFFFFFFFFFFFFFFFFFFFFFFFFFF:  
@A00155:342:HHGFNDSXY:1:1352:11568:5901 2:N:0:GAACCTAG+TCCGCATA  
TAGCCTACTAGACTACGACTTACACGGTAGGTCGTGAACAAGCCCGGAGTACATCTCCTTTGGAACCA  
GGAGACCCCTCCGGTCTTGTCCAACCTCTGTTTCGGCAGAGGATACCGTGCTCCACAGCTGTAAGGCT  
+  
FFFFFFFFFFFFFFFFFFFFFFFFFFFFFFFFFFFFFFFFFFFFFFFFFFFFFFFFFFFFFFFFFFFFFFFFFFFFFFFFFFFFFFFFFFFFFF:  
FFFFFFFFFFFFFFFFFFFFFFFFFFFFFFFFFFFFFFFFFFFFFFFFFFFFFFFFFFFFFFFFFFFFFFFFFFFFFFFFFFFFFFFFFFFFFF:  
@A00155:342:HHGFNDSXY:1:1352:5068:9204 2:N:0:GAACCTAG+TCCGCATA  
GAAACCGTCGTTACTCTTCGAGTTGTGTAAGTTTCGTCCTAAAAAGGACTCGTCAGGTAGCCTACTAG  
ACTACGACTTACACGGTAGGTCGTGAACAAGCCCGGAGTACATCTCCTTTGGAAGTATGAGACCCCTC  
+  
FFFFFFFFFFFFFFFFFFFFFFFFFFFFFFFFFFFFFFFFFFFFFFFFFFFFFFFFFFFFFFFFFFFFFFFFFFFFFFFFFFFFFFFFFFFFFF:  
FFFFFFFFFFFFFFFFFFFFFFFFFFFFFFFFFFFFFFFFFFFFFFFFFFFFFFFFFFFFFFFFFFFFFFFFFFFFFFFFFFFFFFFFFFFFFF:  
@A00155:342:HHGFNDSXY:1:1352:8386:18897 2:N:0:GAACCTAG+TCCGCATA  
GAAACCGTCGTTACTCTTTGAGTTGTGTAAGTTTCGTCCTAAAAAGGACTCGTCAGGTAGCCTACTAG  
ACTACGACTTACACGGTAGGTCGTGAACAAGCCCGGAGTACATCTCCTTTGGAAGTATGAGACCCCTC

FFFFFFFFFFFFFFFFFFFFFFFFFFFFFFFFFFFFFFFFFFFFFFFFFFF:FFFFFFFFFFFFFFFFFFFFFFFFFFFFFFFFFFFFFFFF  
FFFFFFFFFFFFFFFFFFFFFFFFFFFFFFFFFFFFFFFFFFFFFFFFFFFFFFFFFFFFFFFFFFFFFFFFFFFFFFFFFFFFFFFFFFFFF:  
@A00155:342:HHGFNDSXY:1:1352:8232:18944 2:N:0:GAACCTAG+TCCGCATA  
GAAACCGTCGTACTCTTTGAGTTGTGTAAGTTTCGTCCTAAAAAGGACTCGTCAGGTAGCCTACTAG  
ACTACGACTTACACGGTAGGTCGTGAACAAGCCCCGGAGTACATCTCCTTTGGAAGTACCAGGCCCTC  
+  
FFFFFFFFFFFFFFFFFFFFFFFFFFFFFFFFFFFFFFFFFFFFFFFFFFFFFFFFFFFFFFFFFFFFFFFFFFFFFFFFFFFFFFFF  
FFFFFFFFFFFFFFFFFFFFFFFFFFFFFFFFFFFFFFFFFFFFFFFFFFFFFFFFFFFFFFFFFFFFFFFFFFFFFFFFFFFFFFFF  
@A00155:342:HHGFNDSXY:1:1352:19795:19022 2:N:0:GAACCTAG+TCCGCATA  
AGGTAGCCTACTAGACTACGACTTACACGGTAGGTCGTGAACAAGCCCCGGAGTACATCTCCTTTTGAA  
CCAGGAGACCCCCTCCGGTCTTGTCCAACCTCTGTTTCGGCAGAGGATACCGTGCTCCACAGCTGTAAG  
+  
FFFFFFFFFFFFFFFFFFFFFFFFFFFFFFFFFFFFFFFFFFFFFFFFFFFFFFFFFFFFFFFFFFFFFFFFFFFFFFFFFFFFFFFF  
FFFFFFFFFFFFFFFFFFFFFFFFFFFFFFFFFFFFFFFFFFFFFFFFFFFFFFFFFFFFFFFFFFFFFFFFFFFFFFFFFFFFFFFF  
@A00155:342:HHGFNDSXY:1:1352:17309:27743 2:N:0:GAACCTAG+TCCGCATA  
TCCGGTCTTGTCCAACCTCTGTTTCGGCAGAGGATACCGTGCTCCACAGCTGTAAGGCTGTGGGCCCG  
AGAGAAGTCGCTCTCTCTCGCCCTCCACATCCCTCTCGGCATTGAGATGACCATAGGCCAGAGGAGAG  
+  
FFFFFFF:FFFFFFFFFFFFFFFFFFFFFFFFFFFFFFFFFFFFFFFFFFFFFFFFFFFFFFFFFFFFFFFFFFFFFFFFFFFFFFF  
FFFFF:FFFFFFFFFFFFFFFFFFFFFFFFFFFFFFFFFFFFFFFFFFFFFFFFFFFFFFFFFFFFFFFFFFFFFFFFFFFFFFF  
@A00155:342:HHGFNDSXY:1:1353:31304:32095 2:N:0:GAACCTAG+TCCGCATA  
AAGCCCGGAGTACATCTCCTTTGGAAGTACCAGACCCCTCCGGTCTTGTCCAACCTCTGTTTCGGCAG  
AGGATACCGTGCTCCACAGCTGTAAGGCTGTGGGCCCGAGAGAAGTCGCTCTCTCTCGCC  
+  
FFFFF:FFFFF,FFFFFFFFF::FFF:FF,FFFFFFFFFFFFFFFFFFFF,FFFFFFFFFFFFFFFF:FFFFF,F  
FFFF,F:FFFFFFFFFFFFFFFF:FFFFFFFF:FFFFFFFF:Ffff,FFFFFFFFFFFFFFFFFFFF  
@A00155:342:HHGFNDSXY:1:1354:7437:8077 2:N:0:GAACCTAG+TCCGCATA  
GTTTCGTCCTTGGAACGACTCATCAGGGAGCCTACTAGACTCCGACCGTCATGGGGGTTCAAACCA  
TGCCCCGCCACACCGCCTTAGATCAGCTGTGTCCACTTAAGGACTCACCTCTGGCCTATGGTCATCTC  
+  
FFFFFFFFFFFFFFFFFFFFFFFFFFFFFFFFFFFFFFFFFFFFFFFFFFFFFFFFFFFFFFFFFFFFFFFFFFFFFFFFFFFFFFFF  
,FFFFFFFFF:FFFFFFFFFFFFFFFFFFFFFFFFFFFFFFFFFFFFFFFFFFFFFFFFFFFFFFFFFFFFFFFFFFFFFFFF  
@A00155:342:HHGFNDSXY:1:1355:14271:10457 2:N:0:GAACCTAG+TCCGCATA  
ACGGTAGGTCGTGAACAAGCCCCGGAGTACATCTCCTTTGGAAGTACCAGACCCCTCCGGTCTTGTCCA  
ACCTCTGTTTCGGCAGAGGATACCGTGCTCCACAGCTGTAAGGCTGTGGGCCCGAGAGAAGTCGCTCT  
+  
FFFFFFFFFFFFFFFFFFFFFFFFFFFFFFFFFFFFFFFFFFFFFFFFFFFFFFFFFFFFFFFFFFFFFFFFFFFFFFFFFFFFFFF:FFFFF  
FFFFFFFFFFFFFFFFFFFFFFFFFFFFFFFFFFFFFFFFFFFFFFFFFFFFFFFFFFFFFFFFFFFFFFFFFFFFFFFFFFFFFFF:FFFFFFF  
@A00155:342:HHGFNDSXY:1:1355:21359:16094 2:N:0:GAACCTAG+TCCGCATA  
CGGTCTTGTCCAACCTCTGTTTCGGCAGAGGATACCGTGCTCCACAGCTGTAAGGCTGTGGGCCCGAG  
AGAAGTCGCTCTCTCTCGCCCTCCACATCCCTCTCGGCATTGAGATGACCAGAGGCCAGAGGTGAGTC  
+  
FFFFFFFFFFFFFFFFFFFFFFFFFFFFFFFFFFFFFFFFFFFFFFFFFFFFFFFFFFFFFFFFFFFFFFFFFFFFFFFFFFFFFFF:FFFFFFFF  
FFFFFFFFFFFFFFFFFFFFFFFFFFFFFFFFFFFFFFFFFFFFFFFFFFFFFFFFFFFFFFFFFFFFFFFFFFFFFFFFFFFFFFF:FFFFFFFF  
@A00155:342:HHGFNDSXY:1:1355:31774:29997 2:N:0:GAACCTAG+TCCGCATA  
TACACGGTAGGTCGTGAACAAGCCCCGGAGTACATCTCCTTTGGAACCAGGAGACCCCTCCGGTCTTGT  
CCAACCTCTGTTTCGGCAGAGGATACCGTGCTCCACAGCTGTAAGGCTGTGGGCCCGAGAGAAGTCGC  
+  
FFFFFFFF:FFF,FFFFFFFFFFFFFFFFFFFFFFFFFFFFFFFFFFFFFFFF,FFFFFFFFFFFFFFF,FFFF,FFFFF  
FFFFFFFFFFFF:FFFFFFFFFFFFFFF:FFFFF:FFFFFFFFFFFFFFF,,FFFFFFFFFF,FFFFFFFFFFFFFFFF  
@A00155:342:HHGFNDSXY:1:1355:26765:31344 2:N:0:GAACCTAG+TCCGCATA  
AGTACATCTCCTTTGGAACCAGGAGACCCCTCCGGTCTTGTCCAACCTCTGTTTCGGCAGAGGATACC  
GTGCTCCACAGCTGTAAGGCTGTGGGCCCGAGAGAAGTCGCTCTCTCTCGCCCTCCACATCCCTCTCG



[illegible]

```
FFFFFFFFFFF:FFFFFFFFF  
FFFF,F:FFFFFFFFF,FFFFFFFFF  
@A00155:342:HHGFNDSXY:1:1358:14190:9502 2:N:0:GAACCTAG+TCCGCATA  
TCCAAGGACGAAACCGTCGTACTCTTCGAGTTGTGTAAGTTTCGTCCTAAAAAGGACTCGTCAGGTA  
GCCTACTAGACTACGACTTACACGGTAGGTCGTGAACAAGCCCCGGAGTACATCTCCTTTGGA ACTAGG  
+  
FFFFFFFFFFFFFFF:FFFFFFFFF:F:FFFFFFFFF:FFFF  
FFFFFFFFFFFFFFFFFFFFFFFFFFFFFFFFFFFFFFFFFFFFFFFFFFFFFFFFFFFFFFFFFFFFFFFF  
@A00155:342:HHGFNDSXY:1:1358:26449:12258 2:N:0:GAACCTAG+TCCGCATA  
GTTGTGTAAGTTTTGTCCTAAAAAGGACTCGTCAGGTAGCCTACTAGACTACGACTTACACGGTAGGT  
CGTGAACAAGCCCCGGAGTACATCTCCTTTGGA ACTAGGAGACCCTCCGGTCTTG TCCAACCTCTGTT  
+  
FFFFFFFFFFFFFFFFFFFFFFFFFFFFFFFFFFFFFFFFFFFFFFFFFFFFFFFFFFFFFFFFFFFFFFFF  
FFFFFFFFFFFFFFFFFFFFFFFFFFFFFFFFFFFFFFFFFFFFFFFFFFFFFFFFFFFFFFFFFFFFFFFF  
@A00155:342:HHGFNDSXY:1:1358:20844:18646 2:N:0:GAACCTAG+TCCGCATA  
GGACTCGTCAGGTAGCCTACTAGACTACGACTTACACGGTAGGTCTGTAACAAGCCCCGGAGTACATCT  
CCTTTGGA ACCAGGAGACCCTCCGGTCTTG TCCAACCTCTGTTTCGGCAGAGGATACCGTGCTCCAC  
+  
FFFFFFFFFFFFFFFFFFFFFFFFFFFFFFFFFFFFFFFFFFFFFFFFFFFFFFFFFFFFFFFFFFFFFFFF  
FFFFFFFFFFFFFFFFFFFFFFFFFFFFFFFFFFFFFFFFFFFFFFFFFFFFFFFFFFFFFFFFFFFFFFFF  
@A00155:342:HHGFNDSXY:1:1358:15646:26678 2:N:0:GAACCTAG+TCCGCATA  
GGTCTTG TCCAACCTCTGTTTCGGCAGAGGATAACCGTGCTCCACAGCTGTAAGGCTGTGGGCCCGAGA  
GAAGTCGCTCTCTCTCGCCCTCCACATCCCTCTCGGCATTGAGATGACCATAGGCCAGAGGTGAGTCC  
+  
FFFFFFFFFFFFFFFFFFFFFFFFFFFFFFFFFFFFFFFFFFFFFFFFFFFFFFFFFFFFFFFFFFFFFFFF  
FFFFFFFFFFFFFFFFFFFFFFFFFFFFFFFFFFFFFFFFFFFFFFFFFFFFFFFFFFFFFFFFFFFFFFFF  
@A00155:342:HHGFNDSXY:1:1358:29758:32643 2:N:0:GAACCTAG+TCCGCATA  
TCCGTTCCAAGGACGAAACCGTCGTACTCTTTGAGTTGTGTAAGTTTCGTCCTAAAAAGGACTCGTC  
AGGTAGCCTACTAGACTACGACTTACACGGTAGGTCTGTAACAAGCCCCGGAGTACATCTCCTTTGGA A  
+  
FFFFFFFFFFFFFFFFFFFFFFFFFFFFFFFFFFFFFFFFFFFFFFFFFFFFFFFFFFFFFFFFFFFFFFFF  
FFFFFFFFFFFFFFF:FFFFFFFFFFFFFFFFFFFFFFFFFFFFFFFFFFFFFFFFFFFFFFFFFFFFFFFF  
@A00155:342:HHGFNDSXY:1:1359:8594:5321 2:N:0:GAACCTAG+TCCGCATA  
AGGACGAAACCGTCGTACTCTTTGAGTTGTGTAAGTTTCGTCCTAAAAAGGACTCGTCAGGTAGCCT  
ACTAGACTACGACTTACACGGTAGGTCTGTAACAAGCCCCGGAGTACATCTCCTTTGGA ACTAGGAGAC  
+  
FFFFFFFFFFFFFFF:FFFFF:FFFFFFFFF:FFFFFFFFFFFFFFF,FFFFFFFFFFFFFFFFFFFFFFF  
FFFFFFFFFFFFFFFFFFFFFFFFFFFFFFFFFFFFFFFFFFFFFFFFFFFFFFFFFFFFFFFFFFFFFFFF  
@A00155:342:HHGFNDSXY:1:1359:21603:34209 2:N:0:GAACCTAG+TCCGCATA  
TACGACTTACACGGTAGGTCTGTAACAAGCCCCGGAGTACATCTCCTTTGGA ACCAGGAGACCCTCCG  
GTCTTG TCCAACCTCTGTTTCGGCAGAGGATAACCGTGCTCCACAGCTGTAAGGCTGTGGGCCCGAGAG  
+  
FFFFFFFFFFFFFFFFF:FFFFFFFFFFFFFFFFFFFFFFFFFFFFFFFFFFFFFFFFFFFFFFFFFFFFFFF  
FFFFFFFFFFFFFFFFFFFFFFFFFFFFFFFFFFFFFFFFFFFFFFFFFFFFFFFFFFFFFFFFFFFFFFFF  
@A00155:342:HHGFNDSXY:1:1360:21866:1720 2:N:0:GAACCTAG+TCCGCATA  
CCCTCCGGTCTTG TCCAACCTCTGTTTCGGCAGAGGATAACCGTGCTCCACAGCTGTAAGGCTGTGGG  
CCGAGAGAAGTCGCTCTCTCTCGCCCTCACATCCCTCTCGGCATTGAGATGACCATAGGCCAGAGG  
+  
FFFFFFFFFFFFFFFFF:FFFFFFFFFFFFFFFFFFFFFFFFFFFFFFFFFFFFFFFFFFFFFFFFFFFFFFF  
FFFFFFFFFFFFFFFFFFFFFFFFFFFFFFFFFFFFFFFFFFFFFFFFFFFFFFFFFFFFFFFFFFFFFFFF  
@A00155:342:HHGFNDSXY:1:1360:25220:8406 2:N:0:GAACCTAG+TCCGCATA  
GTGAACAAGCCCCGGAGTACATCTCCTTTGGA ACTAGGAGACCCTCCGGTCTTG TCCAACCTCTGTT  
CGGCAGAGGATAACCGTGCTCCACAGCTGTAAGGCTGTGGGCCCGAGAGAAGTCGCTCTCTCTCGCCCT
```

[illegible]

FFFFFFFFFFF,,FFF:FFFFFFFFFFFFFFFFFFFFFFFFFFFFFFFF:FFFF  
:FFFFFFFFF:F:FFFFFFFFFFFFFFFFFFFFFFFFFFFFFFFF,FFFF:FFFFFFFFFFFF,FFFF,FFFF  
@A00155:342:HHGFNDSXY:1:1362:19795:11537 2:N:0:GAACCTAG+TCCGCATA  
CCTACTAGACTACGACTTACACGGTAGGTCTGTAACAAGCCCGGAGTACATCTCCTTTGGAAGTAGGA  
GACCCCTCCGGTCTTGTC AACCTCTGTTTCGGCAGAGGATACCGTGCTCCACAGCTGTAAGGCTGTG  
+  
FF,FFFFFFFFFFFFFFFFFFFFFFFFFFFFFFFFFFFFFFFF:FFFF:F:FFFFFFFFFFFFFFFFFFFFFFFF  
FFFFFFFFFFFF:F,FFFFFFFFFFFF:FFF:FFFFFF:F:FFFFFFFFFFFFFFFFFFFFFFFF,FF:FFFF  
@A00155:342:HHGFNDSXY:1:1362:1714:34303 2:N:0:GAACCTAG+TCCGCATA  
GGACTCGTCAGGTAGCCTACTAGACTACGACTTACACGGTAGGTCTGTAACAAGCCCGGAGTACATCT  
CCTTTGGAAGTAGGAGACCCCTCCGGTCTTGTC AACCTCTGTTTCGGCAGAGGATACCGTGCTCCAC  
+  
FFFFFFFFFFFFFFFFFFFFFFFFFFFFFFFFFFFFFFFF,FFFFFFFF:F:FFFFFFFFFFFFFFFFFFFFFFFF  
FFFFFFFFFFFFFFFFFFFFFFFFFFFFFFFFFFFFFFFFFFFFFFFFFFFFFFFFFFFFFFFF,FFF:FF,FFFFFFFF  
@A00155:342:HHGFNDSXY:1:1362:24261:35274 2:N:0:GAACCTAG+TCCGCATA  
GAGACCCCTCCGGTCTTGTC AACCTCTGTTTCGGCAGAGGATACCGTGCTCCACAGCTGTAAGGCTG  
TGGGCCCGAGAGAAGTCGCTCTCTCGCCCTCCACATCCCTCTCGGCATTGAGATGACCATAGGCCA  
+  
FFFFFFFFFFFFFFFF:FFFFFF:FFFFFFFFFFFFFFFFFFFFFFFFFFFFFFFFFFFFFFFF:FFFFFF:FFF  
FFFFFFFFFFFFFFFFFFFFFFFFFFFFFFFFFFFFFFFFFFFFFFFFFFFFFFFFFFFFFFFFFFFFFFFF:FFF,FFF  
@A00155:342:HHGFNDSXY:1:1363:26955:18176 2:N:0:GAACCTAG+TCCGCATA  
GTGAACAAGCCCGGAGTACATCTCCTTTGGAAGTAGGAGACCCCTCCGGTCTTGTC AACCTCTGTTT  
CGGCAGAGGATACCGTGCTCCACAGCTGTAAGGCTGTGGGCCCGAGAGAAGTCGCTCTCTCTCGCCCT  
+  
FFFFFFFFFFFFFFFFFFFFFFFFFFFFFFFFFFFFFFFFFFFFFFFFFFFFFFFFFFFFFFFFFFFFFFFF:FFF  
FFFFFFFFFFFFFFFFFFFFFFFFFFFFFFFFFFFFFFFFFFFFFFFFFFFFFFFFFFFFFFFFFFFFFFFF, :FFFFFFFFFFFFFFFF  
@A00155:342:HHGFNDSXY:1:1363:24560:24643 2:N:0:GAACCTAG+TCCGCATA  
ATGGAAGTAGGAGACCCCTCCGGTCTTGTC AACCTCTGTTTCGGCAGAGGATACCGTGCTCCACAGC  
TGTAAGGCTGTGGGCCCGAGAGAAGTCGCTCTCTCTCGCCCTCCACATCCCTCTCGGCATTGAGATGA  
+  
FFFFFFFFFFFFFFFFFFFFFFFFFFFFFFFFFFFFFFFFFFFFFFFFFFFFFFFFFFFFFFFF:FFFFFFFFFFFFFFFF  
,FFFFFFFFFFFFFFFFFFFFFFFFFFFFFFFFFFFFFFFFFFFFFFFFFFFFFFFFFFFFFFFFFFFFFFFF:FF  
@A00155:342:HHGFNDSXY:1:1363:6144:29262 2:N:0:GAACCTAG+TCCGCATA  
GAAACCGTCGTTACTCTTCGAGTTGTGTAAGTTTCGTCCTAAAAGGACTCGTCAGGTAGCCTACTAG  
ACTACGACTTACACGGTAGGTCTGTAACAAGCCCGGAGTACATCTCCTTTGGAAGTAGGAGACCCCTC  
+  
FFFFFFF,FF:FFFF:FFFFFFFFFFFFFFFF:FFFFFFFFFFFFFFFF:FFFFFFFFFFFFFFFFFFFFFFFF  
FFFFFFFFFFFFFFFFFFFFFFFFFFFFFFFF:FFFFFFFFFFFFFFFFFFFFFFFF,FFFFFFFFFFFFFFFF  
@A00155:342:HHGFNDSXY:1:1363:2880:33661 2:N:0:GAACCTAG+TCCGCATA  
GTGAACAAGCCCGGAGTACATCTCCTTTGGAAGTAGGAGACCCCTCCGGTCTTGTC AACCTCTGTTT  
CGGCAGAGGATACCGTGCTCCACAGCTGTAAGGCTGTGGGCCCGAGAGAAGTCGCTCTCTCTCGCCCT  
+  
FFF:FFFFFFFFFFFFFFFFFFFFFFFFFFFFFFFFFFFFFFFFFFFFFFFFFFFFFFFFFFFFFFFFFFFFFFFF  
FFFFFFFFFFFFFFFFFFFFFFFFFFFFFFFFFFFFFFFFFFFFFFFFFFFFFFFFFFFFFFFFFFFFFFFF:FF  
@A00155:342:HHGFNDSXY:1:1364:28782:18239 2:N:0:GAACCTAG+TCCGCATA  
AAAAAGGACTCGTCAGGTAGCCTACTAGACTACGACTTACACGGTAGGTCTGTAACAAGCCCGGAGTA  
CATCTCCTTTGGAACCAGGAGACCCCTCCGGTCTTGTC AACCTCTGTTTCGGCAGAGGATACCGTGCT  
+  
FFFFFFFFFFFFFFFFFFFFFFFFFFFFFFFFFFFFFFFFFFFFFFFFFFFFFFFFFFFFFFFFFFFFFFFF  
FFFFFFFFFFFFFFFF:FFFFFFFFFFFFFFFFFFFFFFFFFFFFFFFFFFFFFFFFFFFFFFFFFFFFFFFF  
@A00155:342:HHGFNDSXY:1:1364:25328:35399 2:N:0:GAACCTAG+TCCGCATA  
GGTCGTGAACAAGCCCGGAGTACATCTCCTTTGGAACCAGGAGACCCCTCCGGTCTTGTC AACCTCT  
GTTTCGGCAGAGGATACCGTGCTCCACAGCTGTAAGGCTGTGGGCCCGAGAGAAGTCGCTCTCTCTCG

FFFFFFFFFFFFFFFFFFFFFFFFFFFFFFFFFFFFFFFFFFFFFFFFFFFFFFFFFFFFFFFFFFFFFFFF  
FFFFFFFFFFFFFFFFFFFFFFFFFFFFFFFFFFFFFFFFFFFFFFFFFFFFFFFFFFFFFFFFFFFFFFFF  
@A00155:342:HHGFNDSXY:1:1365:4255:7983 2:N:0:GAACCTAG+TCCGCATA  
GGACTCGTCAGGTAGCCTACTAGACTACGACTTACACGGTAGGTCGTGAACAAGCCCGAGTACATCT  
CCTTTGGAAGTAGGAGACCCCTCCGGTCTTGTCCAACCTCTGTTTCGGCAGAGGATACCGTGCTCCAC  
+  
FFFFFFFFFFFFFFFFFFFFFFFFFFFFFFFFFFFFFFFFFFFFFFFFFFFFFFFFFFFFFFFFFFFFFFFF  
FFFFFFFFFFFFFFFFFFFFFFFFFFFFFFFFFFFFFFFFFFFFFFFFFFFFFFFFFFFFFFFFFFFFFFFF  
@A00155:342:HHGFNDSXY:1:1365:32723:15201 2:N:0:GAACCTAG+TCCGCATA  
GTACATCTCCTTTGGAAGTAGGAGACCCCTCCGGTCTTGTCCAACCTCTGTTTCGGCAGAGGATACCG  
TGCTCCACAGCTGTAAGGCTGTGGGCCCGAGAGAAGTCGCTCTCTCTCGCCCTCCACATCCCTCTCGG  
+  
FFFFFFFFFFFFFFFFFFFFFFFFFFFFFFFFFFFFFFFFFFFFFFFFFFFFFFFFFFFFFFFFFFFFFFFF  
FFFFFFFFFFFFFFFFFFFFFFFFFFFFFFFFFFFFFFFFFFFFFFFFFFFFFFFFFFFFFFFFFFFFFFFF  
@A00155:342:HHGFNDSXY:1:1365:26521:22435 2:N:0:GAACCTAG+TCCGCATA  
AAACTTACACAAGTAACGACGGTTTCGTCTTGGAACGGACTCATCAGGGAGCCTACTAG  
ACTCCGACCGTCATGGGGTTCAAACCCATGCCCGCCACACCGCCTTAGATCAGCTGTGTCTACTTA  
+  
FFFFFFFFFFFFFFFFFFFFFFFFFFFFFFFFFFFFFFFFFFFFFFFFFFFFFFFFFFFFFFFFFFFFFFFF  
FF:FFFFFFFFFFFFFFFFFFFFFFFFFFFFFFFFFFFFFFFFFFFFFFFFFFFFFFFFFFFFFFFFFFFF  
@A00155:342:HHGFNDSXY:1:1365:18566:23876 2:N:0:GAACCTAG+TCCGCATA  
CAGGTAGCCTACTAGACTACGACTTACACGGTAGGTCGTGAACAAGCCCGAGTACATCTCCTTTGGA  
ACTAGGAGACCCCTCCGGTCTTGTCCAACCTCTGTTTCGGCAGAGGATACCGTGCTCCACAGCTGTAA  
+  
FFFFFFFFFFFFFFFFFFFFFFFFFFFFFFFFFFFFFFFFFFFFFFFFFFFFFFFFFFFFFFFFFFFFFFFF  
:FFFFFFFFFFFFFFFFFFFFFFFFFFFFFFFFFFFFFFFFFFFFFFFFFFFFFFFFFFFFFFFFFFFFFFFF  
@A00155:342:HHGFNDSXY:1:1366:31602:8844 2:N:0:GAACCTAG+TCCGCATA  
GAAACCGTCGTTACTCTTCGAGTTGTGTAAGTTTCGTCCTAAAAAGGACTCGTCAGGTAGCCTACTAG  
ACTACGACTTACACGGTAGGTCGTGAACAAGCCCGAGTACATCTCCTTTGGAAGTAGGAGACCCCTC  
+  
FFFFFFFFFFFFFFFFFFFFFFFFFFFFFFFFFFFFFFFFFFFFFFFFFFFFFFFFFFFFFFFFFFFFFFFF  
FFF:FF:F:FFF:FFFFFFFFFFFFFFFFFFFFFFFFFFFFFFFFFFFFFFFFFFFFFFFFFFFFFFFF  
@A00155:342:HHGFNDSXY:1:1366:6488:8907 2:N:0:GAACCTAG+TCCGCATA  
TAGACTACGACTTACACGGTAGGTCGTGAACAAGCCCGAGTACATCTCCTTTGGAAGTAGGAGACCC  
CTCCGGTCTTGTCCAACCTCTGTTTCGGCAGAGGATACCGTGCTCCACAGCTGTAAGGCTGTGGGCC  
+  
FFFFFFFFFFFFFFFFFFFFFFFFFFFFFFFFFFFFFFFFFFFFFFFFFFFFFFFFFFFFFFFFFFFFFFFF  
FFFFFFFFFFFFFFFFFFFFFFFFFFFFFFFFFFFFFFFFFFFFFFFFFFFFFFFFFFFFFFFFFFFFFFFF  
@A00155:342:HHGFNDSXY:1:1366:16848:9095 2:N:0:GAACCTAG+TCCGCATA  
TACGACTTACACGGTAGGTCGTGAACAAGCCCGAGTACATCTCCTTTGGAACCAGGAGACCCCTCCG  
GTCTTGTCCAACCTCTGTTTCGGCAGAGGATACCGTGCTCCACAGCTGTAAGGCTGTGGGCCCG  
+  
FFFFFFFFFFFFFFFFFFFFFFFFFFFFFFFFFFFFFFFFFFFFFFFFFFFFFFFFFFFFFFFFFFFFFFFF  
FFF:FFFF,FFFFFFFFFFFFFFFFFFFFFFFFFFFFFFFFFFFFFFFFFFFFFFFFFFFFFFFFFFFF  
@A00155:342:HHGFNDSXY:1:1366:12382:12947 2:N:0:GAACCTAG+TCCGCATA  
GTGAACAAGCCCGAGTACATCTCCTTTGGAAGTAGGAGACCCCTCCGGTCTTGTCCAACCTCTGTT  
CGGCAGAGGATACCGTGCTCCACAGCTGTAAGGCTGTGGGCCCGAGAGAAGTCGCTCTCTCTCGCCCT  
+  
:FFFFFFFFFFFFFFFFFFFFFFFFFFFFFFFFFFFFFFFFFFFFFFFFFFFFFFFFFFFFFFFFFFFFFFFF  
FFFFFFFF,FFFF,FFFFFFFFFFFFFFFFFFFFFFFFFFFFFFFFFFFFFFFFFFFFFFFFFFFFFFFF  
@A00155:342:HHGFNDSXY:1:1366:10827:13416 2:N:0:GAACCTAG+TCCGCATA  
GGACTCGTCAGGTAGCCTACTAGACTACGACTTACACGGTAGGTCGTGAACAAGCCCGAGTACATCT  
CCTTTGGAACCAGGAGACCCCTCCGGTCTTGTCCAACCTCTGTTTCGGCAGAGGATACCGTGCTCCAC  
+

FFFFFFFFFFFFFFFFFFFFFFFFFFFFFFFFFFFFFFFFFFFFFFFFFFFFFFFFFFFFFFFFFFFFFFFF  
FFFFFFFFFFFFFFFFFFFFFFFFFFFFFFFFFFFFFFFFFFFFFFFFFFFFFFFFFFFFFFFFFFFFFFFF:  
@A00155:342:HHGFNDSXY:1:1366:10655:20979 2:N:0:GAACCTAG+TCCGCATA  
AGGGATGTAGAGGGCGAGAGAGAGCGACTTCTCTCGGGCCACAGCCTTACAGCTGTGGAGCACGGTA  
TCCTCTGCCGAAACAGAGGTTGGACAAGACCGGAGGGGTCTCCTAGTTCCAAAGGAGATGTACTCCGG  
+  
FFFFFFFFFFFFFFFFFFFFFFFFFFFFFFFFFFFFFFFFFFFFFFFFFFFFFFFFFFFFFFFFFFFFFFFF:  
FFFFFFFFFFFFFFFFFFFFFFFFFFFFFFFFFFFFFFFFFFFFFFFFFFFFFFFFFFFFFFFFFFFFFFFF:  
@A00155:342:HHGFNDSXY:1:1366:7419:28651 2:N:0:GAACCTAG+TCCGCATA  
TAGGAGACCCCTCCGGTCTTGTCCAACCTCTGTTTCGGCAGAGGATACCGTGCTCCACAGCTGTAAGG  
CTGTGGGCCCGAGAGAAGTCGCTCTCTCTCGCCCTCCACATCCCTCTCGGCATTGAGATGACCATAGG  
+  
FFFFFFFFFFFFFFFFFFFFFFFFFFFFFFFFFFFFFFFFFFFFFFFFFFFFFFFFFFFFFFFFFFFFFFFF  
FFFFFFFFFFFFFFFFFFFFFFFFFFFFFFFFFFFFFFFFFFFFFFFFFFFFFFFFFFFFFFFFFFFFFFFF,  
@A00155:342:HHGFNDSXY:1:1366:9127:32174 2:N:0:GAACCTAG+TCCGCATA  
CACCTCTGGCCTATGGTCATCTCAATGCCGAGAGGGATGTGGAGGGCGAGAGAGAGCGACTTCTCTCG  
GGCCACAGCCTTACAGCTGTGGAGCACGGTATCCTCTGCCGAAACAGAGGTTGGACAAGACCG  
+  
FFFFFFFFF:FFFFFFFF::FFFFFFFFFFFFFFFFFFFFFFFFFFFFFFFFFFFFFFFFFFFFFFFFFFFF  
FFFFFFFFFFFFFFFFFFFFFFFFFFFFFFFFFFFFFFFFFFFFFFFFFFFFFFFFFFFFFFFFFFFFFFFF,  
@A00155:342:HHGFNDSXY:1:1367:32714:3724 2:N:0:GAACCTAG+TCCGCATA  
CCTACTAGACTACGACTTACACGGTAGGTCGTGAACAAGCCCGAGTACATCTCCTTTGGAACCAGGA  
GACCCCTCCGGTCTTGTCCAACCTCTGTTTCGGCAGAGGATACCGTGCTCCACAGCTGTAAGGCTGTG  
+  
FFFFFFFFFFFFFFFFFFFFFFFFFFFFFFFFFFFFFFFFFFFFFFFFFFFFFFFFFFFFFFFFFFFFFFFF  
FFFFFFFFFFFFFFFFFFFFFFFFFFFFFFFFFFFFFFFFFFFFFFFFFFFFFFFFFFFFFFFFFFFFFFFF:  
@A00155:342:HHGFNDSXY:1:1367:10881:6934 2:N:0:GAACCTAG+TCCGCATA  
CTACGACTTACACGGTAGGTCGTGAACAAGCCCGAGTACATCTCCTTTGGAAGTACGAGACCCCTCC  
GGTCTTGTCCAACCTCTGTTTCGGCAGAGGATACCGTGCTCCACAGCTGTAAGGCTGTGGGCCCGAGA  
+  
FFFFFFFFFFFFFFFFFFFFFFFFFFFFFFFFFFFFFFFFFFFFFFFFFFFFFFFFFFFFFFFFFFFFFFFF  
FFFFFFFFFFFFFFF:FFFFFFFFFFFFFFFFFFFFFFFFFFFFFFFFFFFFFFFFFFFFFFFFFFFFFFFF  
@A00155:342:HHGFNDSXY:1:1367:23375:18991 2:N:0:GAACCTAG+TCCGCATA  
ACTAGACTCCGACCGTCATGGGGGTTCAAACCCATGCCCCGCCACACCGCCTTAGATCAGCTGTGTCC  
ACTTAAGGACTCACCTCTGGCCTATGGTCATCTCAATGCCGAGAGGGATGGGGAGGGCGAGAGAGAGC  
+  
FFFFFFFFFFFFFFFFFFFFFFFFFFFFFFFFFFFFFFFFFFFFFFFFFFFFFFFFFFFFFFFFFFFFFFFF:  
:FFFF,FFFFFFFFFFFFFFFFFFFFFFFFFFFFFFFFFFFFFFFFFFFFFFFFFFFFFFFFFFFFFFFF:  
@A00155:342:HHGFNDSXY:1:1367:20907:19977 2:N:0:GAACCTAG+TCCGCATA  
GAGACCCCTCCGGTCTTGTCCAACCTCTGTTTCGGCAGAGGATACCGTGCTCCACAGCTGTAAGGCTG  
TGGGCCCGAGAGAAGTCGCTCTCTCTCGCCTTCCACATCCCTCTCGGCATTGAGATGACCATAGGCCA  
+  
FFFFFFFFFFFFFFFFFFFFFFFFFFFFFFFFFFFFFFFFFFFFFFFFFFFFFFFFFFFFFFFFFFFFFFFF  
FFFFFFFFFFFFFFFFFFFFFFFFFFFFFFFFFFFFFFFFFFFFFFFFFFFFFFFFFFFFFFFFFFFFFFFF,  
@A00155:342:HHGFNDSXY:1:1367:26024:22075 2:N:0:GAACCTAG+TCCGCATA  
ACTAGACTCCGACCGTCATGGGGGTTCAAACCCATGCCCCGCCACACCGCCTTAGATCAGCTGTGTCC  
ACTTAAGGACTCACCTCTGGCCTATGGTCATCTCAATGCCGAGAGGGATGTGGAGGGCGAGAGAGAGC  
+  
FFFFFFFFFFFFFFFFFFFFFFFFFFFFFFFFFFFFFFFFFFFFFFFFFFFFFFFFFFFFFFFFFFFFFFFF  
FFFFFFFFFFFFFFFFFFFFFFFFFFFFFFFFFFFFFFFFFFFFFFFFFFFFFFFFFFFFFFFFFFFFFFFF:  
@A00155:342:HHGFNDSXY:1:1367:27498:35493 2:N:0:GAACCTAG+TCCGCATA  
CAGGTAGCCTACTAGACTACGACTTACACGGTAGGTCGTGAACAAGCCCGAGTACATCTCCTTTGGA  
ACTAGGAGACCCCTCCGGTCTTGTCCAACCTCTGTTTCGGCAGAGGATACCGTGCTCCACAGCTGTAA  
+

F:FFF:FFFFFFFFFFFFFFFFFFFFFFFFFFFFFFFFFFFFFFFFFFFFFFFFFFFFFFFFFFFFFFFFFFFFFFFFFFFFFFFF  
FFFFF:FFFFFFFFFFFFFFFF,FFFFFFFFFFFFFFFFFFFFFFFFFFFFFFFFFFFFFFFFFFFFFFFFFFFFFFFFFFFFFFFF  
@A00155:342:HHGFNDSXY:1:1368:3794:4335 2:N:0:GAACCTAG+TCCGCATA  
ACTAGACTACGACTTACACGGTAGGTCGTGAACAAGCCCGGAGTACATCTCCTTTGGAAGTACAGGAGAC  
CCCTCCGGTCTTGTCCAACCTCTGTTTCGGCAGAGGATACCGTGCTCCACAGCTGTAAGGCTGTGGGC  
+  
FFFFFFFFFFFFFFFFFFFFFFFFFFFFFFFFFFFFFFFFFFFFFFFFFFFFFFFFFFFFFFFFFFFFFFFFFFFFFFFF  
FFFFFFFFFFFF:FFFFFFFFFFFFFFFFFFFFFFFFFFFFFFFFFFFFFFFFFFFFFFFFFFFFFFFFFFFFFFFFFFFFF  
@A00155:342:HHGFNDSXY:1:1368:11822:7905 2:N:0:GAACCTAG+TCCGCATA  
ACTAGGAGACCCCTCCGGTCTTGTCCAACCTCTGTTTCGGCAGAGGATACCGTGCTCCACAGCTGTAA  
GGCTGTGGGCCCGAGAGAAGTCGCTCTCTCTCGCCCTCCACATCCCTCTCGGCATTGAGATGACCATA  
+  
FFFFFFFFFFFFFFFFFFFFFFFFFFFFFFFFFFFFFFFFFFFFFFFFFFFFFFFFFFFFFFFFFFFFFFFFFFFFFFFF  
FFFFFFFFFFFFFFFFFFFFFFFFFFFFFFFFFFFFFFFFFFFFFFFFFFFFFFFFFFFFFFFFFFFFFFFFFFFFFFFF  
@A00155:342:HHGFNDSXY:1:1368:11785:7936 2:N:0:GAACCTAG+TCCGCATA  
ACTAGGAGACCCCTCCGGTCTTGTCCAACCTCTGTTTCGGCAGAGGATACCGTGCTCCACAGCTGTAA  
GGCTGTGGGCCCGAGAGAAGTCGCTCTCTCTCGCCCTCCACATCCCTCTCGGCATTGAGATGACCATA  
+  
FFFFFFFFFFFFFFFFFFFFFFFFFFFFFFFFFFFFFFFFFFFFFFFFFFFFFFFFFFFFFFFFFFFFFFFFFFFFFFFF  
FF:FFFFFFFFFFFFFFFFFFFFFFFFFFFFFFFFFFFFFFFFFFFFFFFFFFFFFFFFFFFFFFFFFFFFFFFFFFFFF  
@A00155:342:HHGFNDSXY:1:1368:5710:11882 2:N:0:GAACCTAG+TCCGCATA  
AGTTGTGTAAGTTTCGTCCTAAAAAGGACTCGTCAGGTAGCCTACTAGACTACGACTTACACGGTAGG  
TCGTGAACAAGCCCGGAGTACATCTCCTTTGGAAGTACAGGAGACCCCTCCGGTCTTGTCCAACCTCTGT  
+  
FFFFFFFFFF,FFFFFFFFFF,FFFFFFFFFFFFFFFFFFFFFFFFFFFFFFFFFFFFFFFF,FFFFFFFFF:FFFFFFF:F  
::FFFFFFFFFFFFFFFF:FFFFFFF,:F:FFFFFFFFFFFFFFFF:FFFFFFF,FFFFFFFFFFFF:F  
@A00155:342:HHGFNDSXY:1:1368:7771:20118 2:N:0:GAACCTAG+TCCGCATA  
GGACTCGTCAGGTAGCCTACTAGACTACGACTTACACGGTAGGTCGTGAACAAGCCCGGAGTACATCT  
CCTTTGGAAGTACAGGAGACCCCTCCGGTCTTGTCCAACCTCTGTTTCGGCAGAGGATACCGTGCTCCAC  
+  
FFFFFFFFFFFFFFFF:FFFFFFFFFFFFFFFFFFFFFFFFFFFFFFFFFFFFFFFFFFFFFFFFFFFFFFFFFFFFF:FFF  
FFFFFFFFFFFFFFFF:FFFFFFFFFFFFFFFFFFFFFFFFFFFFFFFFFFFFFFFFFFFFFFFFFFFFFFFFFFFFF  
@A00155:342:HHGFNDSXY:1:1368:10456:22326 2:N:0:GAACCTAG+TCCGCATA  
GGACTCGTCAGGTAGCCTACTAGACTACGACTTACACGGTAGGTCGTGAACAAGCCCGGAGTACATCT  
CCTTTGGAAGTACAGGAGACCCCTCCGGTCTTGTCCAACCTCTGTTTCGGCAGAGGATACCGTGCTCCAC  
+  
FFFFFFFFFFFFFFFFFFFFFFFFFFFFFFFFFFFFFFFFFFFFFFFFFFFFFFFFFFFFFFFFFFFFFFFFFFFFF  
FFFFFFFFF,FFFFFFF:FFFFFFFFFFFFFFFFFFFFFFFFFFFFFFFFFFFFFFFFFFFFFFFFFFFFFFFFFFFFF  
@A00155:342:HHGFNDSXY:1:1369:31448:1595 2:N:0:GAACCTAG+TCCGCATA  
ACTAGGAGACCCCTCCGGTCTTGTCCAACCTCTGTTTCGGCAGAGGATACCGTGCTCCACAGCTGTAA  
GGCTGTGGGCCCGAGAGAAGTCGCTCTCTCTCGCCCTCTACATCCCTCTCGGCATTGAGATGAC  
+  
FFFFFFFFFFFFFFFFFFFFFFFFFFFFFFFFFFFFFFFFFFFFFFFFFFFFFFFFFFFFFFFFFFFFFFFFFFFFF:FFFF  
FFFFFFFFFFFFFFFFFFFFFFFFFFFFFFFFFFFFFFFFFFFFFFFFFFFFFFFFFFFFFFFFFFFFFFFFFFFFF  
@A00155:342:HHGFNDSXY:1:1369:9055:2832 2:N:0:GAACCTAG+TCCGCATA  
ACATCTCCTTTGGAAGTACAGGAGACCCCTCCGGTCTTGTCCAACCTCTGTTTCGGCAGAGGATACCGTG  
CTCCACAGCTGTAAGGCTGTGGGCCCGAGAGAAGTCGCTCTCTCTCGCCCTCTACATCCCTCTCGGCA  
+  
FFFFFFFFFFFFFFFFFFFFFFFFFFFFFFFFFFFFFFFFFFFFFFFFFFFFFFFFFFFFFFFFFFFFFFFFFFFFF  
FFFFFFFFFFFFFFFFFFFFFFFFFFFFFFFFFFFFFFFFFFFFFFFFFFFFFFFFFFFFFFFFFFFFFFFFFFFFF  
@A00155:342:HHGFNDSXY:1:1369:4128:8390 2:N:0:GAACCTAG+TCCGCATA  
AAAAGGACTCGTCAGGTAGCCTACTAGACTACGACTTACACGGTAGGTCGTGAACAAGCCCGGAGTAC  
ATCTCCTTTGGAAGTACAGGAGACCCCTCCGGTCTTGTCCAACCTCTGTTTCGGCAGAGGATACCGTGCT  
+

FFFFFFFFFFFFFFFFFFFFFFFFFFFFFFFFFFFFFFFFFFFFFFFFFFFFFFFFFFFFFFFFFFFFFFFF  
:FFFFFF:FFFFFFFFFFFFFFFFFFFFFFFFFFFFFFFFFFFFFFFFFFFFFFFFFFFFFFFFFFFFFFFF  
@A00155:342:HHGFNDSXY:1:1369:14199:17127 2:N:0:GAACCTAG+TCCGCATA  
TTTCGTCTCTAAAAAGGACTCGTCAGGTAGCCTACTAGACTACGACTTACACGGTAGGTCGTGAACAAG  
CCCGGAGTACATCTCCTTTGGAAGTACGAGACCCCTCCGGTCTTGTCCAACCTCTGTTTCGGCAGAGG  
+  
FFFFFFFFFFFFFFFF,FFFFFF:FFF,FFFFFF:FF:FFFFFFFFFFFFFFFFFFFFFFFFFFFFFFFF  
,FFFFFFFFFFFFFFFF,F,FFFFFFFFFFFFFFFFFFFFFFFF:FFFFFF:FFFFFFFFFFFFFF,:FFFF,FF:FF:  
@A00155:342:HHGFNDSXY:1:1369:24198:19601 2:N:0:GAACCTAG+TCCGCATA  
AGGTAGCCTACTAGACTACGACTTACACGGTAGGTCGTGAACAAGCCCGGAGTACATCTCCTTTGGAA  
CTAGGAGACCCCTCCGGTCTTGTCCAACCTCTGTTTCGGCAGAGGATACCGTGCTCCACAGCTGTAAG  
+  
FFFFFFFFFFFFFFFFFFFFFFFFFFFFFFFFFFFFFFFFFFFFFFFFFFFFFFFFFFFFFFFFFFFFFFFF  
FFFFFF:FFFFFFFFFFFFFFFFFFFFFFFFFFFFFFFFFFFFFFFFFFFFFFFFFFFFFFFFFFFFFFFF  
@A00155:342:HHGFNDSXY:1:1369:26992:22467 2:N:0:GAACCTAG+TCCGCATA  
ACTCTTCGAGTTGTGTAAGTTTCGTCTCTAAAAAGGACTCGTCAGGTAGCCTACTAGACTACGACTTAC  
ACGGTAGGTCGTGAACAAGCCCGGAGTACATCTCCTTTGGAAGTACGAGACCCCTCCGGTCTTGTCCA  
+  
,FFFFFFFFFFFFFFFFFFFFFFFFFFFFFFFFFFFFFFFFFFFFFFFFFFFFFFFFFFFFFFFFFFFFFFFF  
FFFFF,FFFFFFFFFFFFFFFF:FFFFFFFFFFFFFFFF:FFFFFFFFFFFFFFFFFFFFFFFFFFFFFFFF  
@A00155:342:HHGFNDSXY:1:1369:30544:29434 2:N:0:GAACCTAG+TCCGCATA  
TAGGACGAACTTACACAACCTCGAAGAGTAACGACGGTTTCGTCTTGGAAACGGACTCATCAGGGAGC  
CTACTAGACTCCGACCGTCATGGGGGTTCAAACCCATGCCCCGCTACACCGCCTTAGATCAGCTGTGT  
+  
FFFFFFFFFFFFFFFFFFFFFFFFFFFFFFFFFFFFFFFFFFFFFFFFFFFFFFFFFFFFFFFFFFFFFFFF  
FFFFFFFFFFFFFFFFFFFFFFFFFFFFFFFFFFFFFFFFFFFFFFFFFFFFFFFFFFFFFFFFFFFFFFFF  
@A00155:342:HHGFNDSXY:1:1369:30065:35274 2:N:0:GAACCTAG+TCCGCATA  
TAGGACGAACTTACACAACCTCGAAGAGTAACGACGGTTTCGTCTTGGAAACGGACTCATCAGGGAGC  
CTACTAGACTCCGACCGTCATGGGGGTTCAAACCCATGCCCCGCTACACCGCCTTAGATCAGCTGTGT  
+  
FFFFFFFFFFFFFFFFFFFFFFFFFFFFFFFFFFFFFFFFFFFFFFFFFFFFFFFFFFFFFFFFFFFFFFFF  
FFFFFF:FFFFFFFFFFFFFFFFFFFFFFFFFFFFFFFFFFFFFFFFFFFFFFFFFFFFFFFFFFFFFFFF  
@A00155:342:HHGFNDSXY:1:1370:8603:3615 2:N:0:GAACCTAG+TCCGCATA  
AGCCCGGAGTACATCTCCTTTGGAAGTACGAGACCCCTCCGGTCTTGTCCAACCTCTGTTTCGGCAGA  
GGATACCGTGCTCCACAGCTGTAAGGCTGTGGGCCCGAGAGAAGTCGCTCTCTCTCGCCCTCCACATC  
+  
FFFFFFFFFFFFFFFFFFFFFFFFFFFFFFFFFFFFFFFFFFFFFFFFFFFFFFFFFFFFFFFFFFFFFFFF,FFFFFF:FFFFFF:  
FFFFFFFFFFFFFFFFFFFFFFFFFFFFFFFF:FFFFFFFFFFFFFFFF:FFFFFFFFFFFFFFFFFFFFFFFF:FFF,FF  
@A00155:342:HHGFNDSXY:1:1370:14913:6872 2:N:0:GAACCTAG+TCCGCATA  
TAGACTACGACTTACACGGTAGGTCGTGAACAAGCCCGGAGTACATCTCCTTTGGAAGTACGAGACCC  
CTCCGGTCTTGTCCAACCTCTGTTTCGGCAGAGGATACCGTGCTCCACAGCTGTAAGGCTGTGGGCC  
+  
FFFFFFFFFFFFFFFFFFFFFFFFFFFFFFFFFFFFFFFFFFFFFFFFFFFFFFFFFFFFFFFFFFFFFFFF  
FFFFFFFFFFFF:FFFFFFFFFFFFFFFFFFFFFFFFFFFFFFFFFFFFFFFFFFFFFFFFFFFFFFFFFFFF  
@A00155:342:HHGFNDSXY:1:1370:18828:20635 2:N:0:GAACCTAG+TCCGCATA  
AGGACGAAACCGTCGTTACTCTTCGAGTTGTGTAAGTTTCGTCTCTAAAAAGGACTCGTCAGGTAGCCT  
ACTAGACTACGACTTACACGGTAGGTCGTGAACAAGCCCGGAGTACATCTCCTTTGGAAGTACGAGAC  
+  
FFFFFFFFFFFFFF:FFFFFFFFFFFFFFFFFFFFFFFFFFFFFFFFFFFFFFFFFFFFFFFFFFFFFFFF  
FFFFFFFFFFFFFFFFFFFFFFFFFFFFFFFFFFFFFFFFFFFFFFFFFFFFFFFFFFFFFFFFFFFFFFFF:  
@A00155:342:HHGFNDSXY:1:1371:20699:16391 2:N:0:GAACCTAG+TCCGCATA  
TCCAAGGACGAAACCGTCGTTACTCTTCGAGTTGTGTAAGTTTCGTCTCTAAAAAGGACTCGTCAGGTA  
GCCTACTAGACTACGACTTACACGGTAGGTCGTGAACAAGCCCGGAGTACATCTCCTTTGGAAGTACG



FFFFFFFFFFFFFFFFFFFFFFFFFFFFFFF:FFFFFFFFFFFFFFFFFFFFFFFFFFFFFFFFFFFFF:FFFFFF  
 FFFFFFFFFFFFFFFFFFFFFFFFFFFFFFFFFFFFFFFFFFFFFFFFFFFFFFFFFFFFFFFFFFFFFFFFFF,FFFFF  
 @A00155:342:HHGFNDSXY:1:1371:30761:16532 2:N:0:GAACCTAG+TCCGCATA  
 GGAGTACATCTCCTTTGAACTAGGAGACCCCTCCGGTCTTGCCAACCTCTGTTCGGCAGAGGATA  
 CCGTGCTCCACAGCTGTAAGGCTGTGGGCCCGAGAGAAGTCGCTCTCTCTCGCCCTCTACATCCCTCT  
 +  
 FFFFFFFFFFFFFFFFFFFFFFFFFFFFFFFFFFFFFFFFFFFFFFFFFFFFFFFFFFFFFFFFFFFFFFFFFF:F:FFFFF  
 FFFFFFFFFFFFFFFFFFFFFFFFFFFFFFFFFFFFFFFFFFFFFFFFFFFFFFFFFFFFFFFFFFFFFFFFFF  
 @A00155:342:HHGFNDSXY:1:1371:12698:21668 2:N:0:GAACCTAG+TCCGCATA  
 AAGCCCCGGAGTACATCTCCTTTGAACTAGGAGACCCCTCCGGTCTTGCCAACCTCTGTTCGGCAG  
 AGGATACCGTGCTCCACAGCTGTAAGGCTGTGGGCCCGAGAGAAGTCGCTCTCTCTCGCCCTCCA  
 +  
 FF,FF::FFFFFFFFFFFFFFFFFFFFFFFFFFFFFFFFFFFFFFFFFFFFFFFFFFFFFFFFFFFFFFFFF,FFFFFFFFFFFFFFFFFFFFFFFFFFFFF  
 FFFFFFFFFFFFFFFFFFFFFFFFFFFFFFFFFFFFFFFFFFFFFFFFFFFFFFFFFFFFFFFFFFFFFFFFFF:FFFF,FFFFFFFFFFFFFFFFFFFFFFFFFFFF  
 @A00155:342:HHGFNDSXY:1:1371:29496:23109 2:N:0:GAACCTAG+TCCGCATA  
 TAGGAGACCCCTCCGGTCTTGCCAACCTCTGTTCGGCAGAGGATACCGTGCTCCACAGCTGTAAGG  
 CTGTGGGCCCGAGAGAAGTCGCTCTCTCTCGCCCTCTACATCCCTCTCGGCATTGAGATGACCATAGG  
 +  
 FFFFFFFFFFFFFFFFFFFFFFFFFFFFFFFFFFFFFFFFFFFFFFFFFFFFFFFFFFFFFFFFFFFFFFFFFF  
 FFFFFFFFFFFFFFFFFFFFFFFFFFFFFFFFFFFFFFFFFFFFFFFFFFFFFFFFFFFFFFFFFFFFFFFFFF  
 @A00155:342:HHGFNDSXY:1:1372:24044:10285 2:N:0:GAACCTAG+TCCGCATA  
 TGTCCAACCTCTGTTCGGCAGAGGATACCGTGCTCCACAGCTGTAAGGCTGTGGGCCCGAGAGAAGT  
 CGCTCTCTCTCGCCCTCCACATCCCTCTCGGCATTGAGATGACCATAGGCCAGAGGAGAGTCCTTAG  
 +  
 FFFFFFFFFFFFFFFFFFFFFFFFFFFFFFFFFFFFFFFFFFFFFFFFFFFFFFFFFFFFFFFFFFFFFFFFFF  
 FFFFFFFFFFFFFFFFFFFFFFFFFFFFFFFFFFFFFFFFFFFFFFFFFFFFFFFFFFFFFFFFFFFFFFFFFF  
 @A00155:342:HHGFNDSXY:1:1372:5755:12367 2:N:0:GAACCTAG+TCCGCATA  
 ACTAGACTACGACTTACACGGTAGGTCGTGAACAAGCCCGAGTACATCTCCTTTGAACTAGGAGAC  
 CCCTCCGGTCTTGCCAACCTCTGTTCGGCAGAGGATACCGTGCTCCACAGCTGTAAGGCTGTGGGC  
 +  
 FFF:FFFFFFFFFFFFFFFFFFFFFFFFFFFFFFFFFFFFFFFFFFFFFFFFFFFFFFFFFFFFFFFFFFFFF  
 FFFFFFFFFFFFFFFFFFFFFFFFFFFFFFFFFFFFFFFFFFFFFFFFFFFFFFFFFFFFFFFFFFFFFFFFFF:FFFFFF,FFFFFF  
 @A00155:342:HHGFNDSXY:1:1372:28004:15890 2:N:0:GAACCTAG+TCCGCATA  
 CATGGGGGTCAAACCATGCCCCGCCACACCGCCTTAGATCAGCTGTGTCCACTTAAGGACTCACCT  
 CTGGCCTATGGTCATCACAATGCCGAGAGGGATGTGGAGGGCGAGAGAGAGCGACTTCTCTCGGGCCC  
 +  
 FFFFFFFFFFFFFFFFFFFFFFFFFFFFFFFFFFFFFFFFFFFFFFFFFFFFFFFFFFFFFFFFFFFFFFFFFF  
 FFFFFFFFFFFFFFFFFFFFFFFFFFFFFFFFFFFFFFFFFFFFFFFFFFFFFFFFFFFFFFFFFFFFFFFFFF:FFFFFFFFFFFFFFFFFFFFFFFFFFFFF  
 @A00155:342:HHGFNDSXY:1:1372:22372:29559 2:N:0:GAACCTAG+TCCGCATA  
 CAGCTGTAAGGCTGTGGGCCCGAGAGAAGTCGCTCTCTCTCGCCCTCCACATCCCTCTCGGCATTGAG  
 ATGACCATAGGCCAGAGGTGAGTCCTTAAGTGGACACAGCTGATCTAAGGCGGTGTGGCGGGG  
 +  
 FFFFFFFFFFFFFFFFFFFFFFFFFFFFFFFFFFFFFFFFFFFFFFFFFFFFFFFFFFFFFFFFFFFFFFFFFF:F:FF  
 FFFFFFFFFFFFFFFFFFFFFFFFFFFFFFFFFFFFFFFFFFFFFFFFFFFFFFFFFFFFFFFFFFFFFFFFFF  
 @A00155:342:HHGFNDSXY:1:1372:16007:32972 2:N:0:GAACCTAG+TCCGCATA  
 TCCAAGGACGAAACCGTCGTTACTCTTGAGTTGTGTAAGTTTCGTCCTAAAAGGACTCGTCAGGTA  
 GCCTACTAGACTACGACTTACACGGTAGGTCGTGAACAAGCCCGAGTACATCTCCTTTGAACTAGG  
 +  
 FFFFFFFFFFFFFF:FFFFFFFFFFFFFFFFFFFFFFFFFFFFFFFFFFFFFFFFFFFFFFFFFFFFFFFFFFFFF  
 FFFFFFFFFFFFFFFFFFFFFFFFFFFFFFFFFFFFFFFFFFFFFFFFFFFFFFFFFFFFFFFFFFFFFFFFFF:FFFFFFFFFFFFFFFFFFFFFFFFFFFFF  
 @A00155:342:HHGFNDSXY:1:1373:12219:12070 2:N:0:GAACCTAG+TCCGCATA  
 AGTACATCTCCTTTGAACTAGGAGACCCCTCCGGTCTTGCCAACCTCTGTTCGGCAGAGGATACC  
 GTGCTCCACAGCTGTAAGGCTGTGGGCCCGAGAGAAGTCGCTCTCTCTCGCCCTCCACATCC

FFF:FFFFFFFFFFFFFFFFFFFFFFFFFFFFFFFFFFFFFFFFFFFFFFFFFFFFFFFFFFFFFFFFFFFFFFFF  
FFFFFFFFFFFFFFFFFFFFFFFFFFFFFFFFFFFFFFFFFFFFFFFFFFFFFFFFFFFFFFFFFFFFFFFF  
@A00155:342:HHGFNDSXY:1:1373:9055:27759 2:N:0:GAACCTAG+TCCGCATA  
ACTTACACGGTAGGTCGTGAACAAGCCCGGAGTACATCTCCTTTGGAACCAGGAGACCCCTCCGGTCT  
TGTCCAACCTCTGTTTCGGCAGAGGATACCGTGCTCCACAGCTGTAAGGCTGTGGGCCCGAGAGAAGT  
+  
FFFFFFFFFFFFFFFFFFFFFFFFFFFFFFFFFFFFFFFFFFFFFFFFFFFFFFFFFFFFFFFFFFFFFFFF  
FFFFFFFFFFFFFFFFFFFFFFFFFFFFFFFFFFFFFFFFFFFFFFFFFFFFFFFFFFFFFFFFFFFFFFFF  
@A00155:342:HHGFNDSXY:1:1373:9435:28103 2:N:0:GAACCTAG+TCCGCATA  
ACTTACACGGTAGGTCGTGAACAAGCCCGGAGTACATCTCCTTTGGAACCAGGAGACCCCTCCGGTCT  
TGTCCAACCTCTGTTTCGGCAGAGGATACCGTGCTCCACAGCTGTAAGGCTGTGGGCCCGAGAGAAGT  
+  
FFFFFFFFFFFFFFFFFFFFFFFFFFFFFFFFFFFFFFFFFFFFFFFFFFFFFFFFFFFFFFFFFFFFFFFF  
FFFFFF:FFFFFFFFFFFF:FFFFFFFFFFFFFFFFFFFFFFFF:FF:FFFFFFFFFFFFFFFFFFFF  
@A00155:342:HHGFNDSXY:1:1373:28004:31861 2:N:0:GAACCTAG+TCCGCATA  
TAGGAGACCCCTCCGGTCTTGTCCAACCTCTGTTTCGGCAGAGGATACCGTGCTCCACAGCTGTAAGG  
CTGTGGGCCCGAGAGAAGTCGCTCTCTCTCGCCCTCCACATCCCTCTCGGCATTGAGATGACCATAGG  
+  
FFF:FFFFFF:FFFFFFFFFFFFFFFFFFFFFFFFFFFFFFFFFFFFFFFFFFFFFFFF:FFFFFFFFFFFFFFFF  
FFFFFFFFFFFFFFFFFFFF:FFFFFFFFFFFFFFFFFFFFFFFFFFFFFFFFFFFFFFFFFFFF,,FFFFFFFFFFFFFFFF  
@A00155:342:HHGFNDSXY:1:1374:27308:15280 2:N:0:GAACCTAG+TCCGCATA  
GTTGTGTAAGTTTCGTCTCTAAAAAGGACTCGTCAGGTAGCCTACTAGACTACGACTTACACGGTAGGT  
CGTGAACAAGCCCGGAGTACATCTCCTTTGGAAGTACTAGGAGACCCCTCCGGTCTTGTCCAACCTCTGTT  
+  
FFFFFFFFFFFFFFFFFFFFFFFFFFFFFFFFFFFFFFFFFFFFFFFFFFFFFFFFFFFFFFFFFFFFFFFF  
FFFFFFFFFFFF:FFFFFFFFFFFFFFFFFFFFFFFFFFFFFFFFFFFFFFFFFFFFFFFFFFFFFFFFFFFFFFFF  
@A00155:342:HHGFNDSXY:1:1374:5032:19476 2:N:0:GAACCTAG+TCCGCATA  
GAAACCGTCGTTACTCTTGGAGTTGTGTAAGTTTCGTCTCTAAAAAGGACTCGTCAGGTAGCCTACTAG  
ACTACGACTTACACGGTAGGTCGTGAACAAGCCCGGAGTACATCTCCTTTGGAAGTACTAGGAGACCCCTC  
+  
FFFFFFFFFFFF:FFFFFF:FFFFFFFFFFFFFFFFFFFFFFFFFFFFFFFFFFFFFFFFFFFF,FFFFFFFFFFFFFFFF  
FF:FFFF::FF:FFFFFFFFFFFFFFFFFFFFFFFFFFFFFFFFFFFF,FFFFFFFFFFFFFFFF::FFFFFFFFFFFF  
@A00155:342:HHGFNDSXY:1:1374:20193:21966 2:N:0:GAACCTAG+TCCGCATA  
ACTCTTCGAGTTGTGTAAGTTTCGTCTCTAAAAAGGACTCGTCAGGTAGCCTACTAGACTACGACTTAC  
ACGGTAGGTCGTGAACAAGCCCGGAGTACATCTCCTTTGGAAGTACTAGGAGACCCCTCCGGTCTTGTCCA  
+  
FFFFFFFFFFFFFFFFFFFFFFFFFFFFFFFFFFFFFFFFFFFFFFFF:FFFFFFFFFFFFFFFFFFFFFFFF:FFFFFFF  
FFFFFFFFFFFFFFFFFFFFFFFFFFFFFFFFFFFF,FFFF,FFFFFFFFFFFF:FFFFFFFFFFFFFFFFFFFF  
@A00155:342:HHGFNDSXY:1:1375:1036:36980 2:N:0:GAACCTAG+TCCGCATA  
ACAAGCCCGGAGTACATCTCCTTTGGAAGTACTAGGAGACCCCTCCGGTCTTGTCCAACCTCTGTTTCGGC  
AGAGGATACCGTGCTCCACAGCTGTAAGGCTGTGGGCCCGAGAGAAGTCGCTCTCTCTCGCCCTCT  
+  
FFFFFFFFFFFFFFFF:FFFF:FF::FFF:,F:FFFFFFFFFFFF:FFFFFF,,FFFFFFFFFFFFFF::FFFFF  
::FFFF:FFFFFFFFFFFF,FFFF,FF:FFFF:FFFFFFFFFFFF:::FFFFFFFF:FFFFFFFFFFFF  
@A00155:342:HHGFNDSXY:1:1376:28420:5963 2:N:0:GAACCTAG+TCCGCATA  
TGTGTAAGTTTCGTCTCTAAAAAGGACTCGTCAGGTAGCCTACTAGACTACGACTTACACGGTAGGTCG  
TGAACAAGCCCGGAGTACATCTCCTTTGGAAGTACTAGGAGACCCCTCCGGTCTTGTCCAACCTCTGTTTC  
+  
FFFFFFFFFFFFFFFFFFFFFFFFFFFFFFFFFFFFFFFFFFFFFFFFFFFFFFFFFFFFFFFFFFFFFFFF  
FFFFFFF,FFFFFFFFFFFFFFFFFFFFFFFFFFFFFFFFFFFFFFFFFFFFFFFFFFFFFFFFFFFFFFFFFFFF  
@A00155:342:HHGFNDSXY:1:1376:8603:6402 2:N:0:GAACCTAG+TCCGCATA  
TCAGGTAGCCTACTAGACTACGACTTACACGGTAGGTCGTGAACAAGCCCGGAGTACATCTCCTTTGG  
AACCAGGAGACCCCTCCGGTCTTGTCCAACCTCTGTTTCGGCAGAGGATACCGTGCTCCACAGCTGTA  
+

[illegible]

FFFFFFFFFFFFFF:FFFFFFFF,,FFFFFFFF,FFFF,F:FFFF:FFFFFFFF:FFFFFFFF:FFFFFFFF  
FF:FFFFFFFF,F,FFFFFFFFFFFFFFFFFFFFFFFF:FFFFFFFFFFFFFFFFFFFFFFFF:FFFFFFFFFFFFF  
@A00155:342:HHGFNDSXY:1:1401:26205:17597 2:N:0:GAACCTAG+TCCGCATA  
GGAACGGACTCATCAGGGAGCCTACTAGACTCCGACCGTCATGGGGGTTCAAACCCATGCCCCGCCAC  
ACCGCCTTAGATCAGCTGTGTCCACTTAAGGACTCACCTCTGGCCTATGGTCATCTCAATGCCGAGAG  
+  
FFFFFFFFFFFFFFFFFFFFFFFFFFFFFFFFFFFFFFFFFFFFFFFFFFFFFFFFFFFFFFFF:FFFFFFFFFFFFFFF  
FFFFFFFFFFFFFFFFFFFFFFFFFFFFFFFFFFFFFFFFFFFFFFFFFFFFFFFFFFFFFFFF:FFFFFF:FFF  
@A00155:342:HHGFNDSXY:1:1402:28772:5697 2:N:0:GAACCTAG+TCCGCATA  
GGAGCCTACTAGACTCCGACCGTCATGGGGGTTCAAACCCATGCCCCGCCACACCGCCTTAGATCAGC  
TGTGTCCACTTAAGGACTCACCTCTGGCCTATGGTCATCTCTATGCCGAGAGGGATGTGGAGGG  
+  
FFF:FFFFFFFFFFFFFFFFFFFFFFFFFFFFFFFFFFFFFFFFFFFFFFFFFFFFFFFF:FFFFFFFFFFFF  
FFFFFFFFFFFFFFFFFFFFFFFFFFFFFFFFFFFFFFFF:FF,,FFFF:FFFFFFFFFFF:FFF:FFF:FFF:FFFFF  
@A00155:342:HHGFNDSXY:1:1402:25464:5791 2:N:0:GAACCTAG+TCCGCATA  
ACGACTTACACGGTAGGTCGTGAACAAGCCCGGAGTACATCTCCTTTGGAAGTAGGAGACCCCTCCGG  
TCTTGTCCAACCTCTGTTTCGGCAGAGGATACCGTGCTCCACAGCTGTAAGGCTGTGGGCCCGAGAGA  
+  
FFFFFFFFFFFFFFFFFFFFFFFFFFFFFFFFFFFFFFFFFFFFFFFFFFFFFFFFFFFFFFFFFFFFFFFF  
FFFFFFFFFFFFFFFFFFFFFFFFFFFFFFFFFFFFFFFFFFFFFFFFFFFFFFFFFFFFFFFF:F:FFFFFFFFFF  
@A00155:342:HHGFNDSXY:1:1402:27453:17503 2:N:0:GAACCTAG+TCCGCATA  
GACTCGTCAGGTAGCCTACTAGACTACGACTTACACGGTAGGTCGTGAACAAGCCCGGAGTACATCTC  
CTTTGGAAGTAGGAGACCCCTCCGGTCTTGTCCAACCTCTGTTTCGGCAGAGGATACCGTGCTCCACA  
+  
FFFFFFFFFFFFFFFFFFFFFFFFFFFFFFFFFFFFFFFFFFFFFFFFFFFFFFFFFFFFFFFFFFFFFFFF  
FFFFFFFFF:FFFFFFFFFFFFFFFFFFFFFFFFFFFFFFFFFFFFFFFFFFFFFFFFFFFFFFFFFFFFFFFF  
@A00155:342:HHGFNDSXY:1:1402:22110:30859 2:N:0:GAACCTAG+TCCGCATA  
GACGAAACCGTCGTTACTCTTTGAGTTGTGTAAGTTTCGTCTAAAAAGGACTCGTCAGGTAGCCTAC  
TAGACTACGACTTACACGGTAGGTCGTGAACAAGCCCGGAGTACATCTCCTTTGGAAGTAGGAGACCC  
+  
FFFFFFFFFFFFFFFFFFFFFFFF:F:FFFFFFFF:F:FFFFFFFFF,FFFFFFFFFFFFFFFF:FFFFFFFFFFFF  
FFFFFFF,FFFFFFFFFFFFFFFFFFFFFFFFFFFFFFFFFFFFFFFFFFFFFFFFFFFFFFFF,FFFFFFFF:FFFFFFFF  
@A00155:342:HHGFNDSXY:1:1403:21630:6261 2:N:0:GAACCTAG+TCCGCATA  
GGACTCGTCAGGTAGCCTACTAGACTACGACTTACACGGTAGGTCGTGAACAAGCCCGGAGTACATCT  
CCTTTGGAAGTAGGAGACCCCTCCGGTCTTGTCCAACCTCTGTTTCGGCAGAGGATACCGTGCTCCAC  
+  
FFFFFFFFFFFFFFFFFFFFFFFFFFFFFFFFFFFFFFFFFFFFFFFFFFFFFFFFFFFFFFFFFFFFFFFF  
FFFFFFFFFFFFFFFFFFFFFFFFFFFFFFFFFFFFFFFFFFFFFFFFFFFFFFFFFFFFFFFF:FFF:FFFFFFF  
@A00155:342:HHGFNDSXY:1:1403:3577:8844 2:N:0:GAACCTAG+TCCGCATA  
ACACGGTAGGTCGTGAACAAGCCCGGAGTACATCTCCTTTGGAAGTAGGAGACCCCTCCGGTCTTGT  
CAACCTCTGTTTCGGCAGAGGATACCGTGCTCCACAGCTGTAAGGCTGTGGGCCCGAGAGAAGTCGCT  
+  
FFFFFFFFFFFFFFFFFFFFFFFFFFFFFFFFFFFFFFFFFFFFFFFFFFFFFFFFFFFFFFFFFFFFFFFF  
FFFFFFFFFFFFFFFFFFFFFFFFFFFFFFFFFFFFFFFFFFFFFFFFFFFFFFFFFFFFFFFF:FFFFFFFFFFFFFFFF  
@A00155:342:HHGFNDSXY:1:1403:26982:15060 2:N:0:GAACCTAG+TCCGCATA  
TAGACTACGACTTACACGGTAGGTCGTGAACAAGCCCGGAGTACATCTCCTTTGGAAGTAGGAGACCC  
CACCGGTCTTGTCCAACCTCTGTTTCGGCAGAGGATACCGTGCTCCACAGCTGTAAGGCTGTGGGCC  
+  
FF:FFFFFFFFFFFFFFFFFFFFFFFFFFFFFFFFFFFFFFFFFFFFFFFFFFFFFFFF,FFFFFFFFFFFFFFFF  
F,,FFF:FFFFFFFFFFFFFFFF,FFFFFFFFFFFFFFFFFFFFFFFFFFFFFFFFFFFFFFFFFFFFFFFF  
@A00155:342:HHGFNDSXY:1:1403:27597:15092 2:N:0:GAACCTAG+TCCGCATA  
GATACCGTGCTCCACAGCTGTAAGGCTGTGGGCCCGAGAGAAGTCGCTCTCTCTCGCCCTCTACATCC  
CTCTCGGCATTGAGATGACCATAGGCCAGAGGTGAGTCCTTAAGTGACACAGCTGATCTAAGGCGGT  
+

[illegible]

[illegible]

[illegible]

@A00155:342:HHGFNDSXY:1:1411:10691:4069 2:N:0:GAACCTAG+TCCGCATA  
CGGTAGGTCGTGAACAAGCCCGGAGTACATCTCCTTTGGAAGTAGGAGACCCCTCCGGTCTTGTCCTCA  
CCTCTGTTTTCGGCAGAGGATACCGTGCTCCACAGCTGTAAGGCTGTGGGCCCGAGAGAAGTCGCTCTC  
+  
FFFFFFFFFFFFFFFFFFFFFFFFFFFFFFFFFFFFFFFFFFFFFFFFFFFFFFFFFFFFFFFFFFFFFFFFFFFFF  
FFFFFFFFFFFFFFFFFFFFFFFFFFFFFFFFFFFFFFFFFFFFFFFFFFFFFFFFFFFFFFFFFFFFFFFFFFFFF  
@A00155:342:HHGFNDSXY:1:1411:26756:11193 2:N:0:GAACCTAG+TCCGCATA  
AACGGACTCATCAGGGAGCCTACTAGACTCCGACCGTCATGGGGGTTCAAACCCATGCCCCGCCACAC  
CGCCTTAGATCAGCTGTGTCCACTTAAGGACTCACCTCTGGCCTATGGTCATCTCAATACCGAGAGGG  
+  
FFFFFFFFFFFFFFFFFFFFFFFFFFFFFFFFFFFFFFFFFFFFFFFFFFFFFFFFFFFFFFFFFFFFFFFFFFFFF  
FFFFFFFFFFFFFFFFFFFFFFFFFFFFFFFFFFFFFFFFFFFFFFFFFFFFFFFFFFFFFFFFFFFFFFFFFFFFF  
@A00155:342:HHGFNDSXY:1:1411:28619:19022 2:N:0:GAACCTAG+TCCGCATA  
GAAACCGTCGTTACTCTTGAGATTGTGTAAGTTTCGTCCTAAAAAGGACTCGTCAGGTAGCCTACTAG  
ACTACGACTTACACGGTAGGTCGTGAACAAGCCCGGAGTACATCTCCTTTGGAAGTAGGAGACCCCTC  
+  
FFF:FFFFFFFFFFFFFFFFFFFFFFFFFFFFFFFFFFFFFFFFFFFFFFFFFFFFFFFFFFFFFFFFFFFFFFF  
FFF:FFFFFFFFFFFFFFFFFFFFFFFFFFFFFFFFFFFFFFFFFFFFFFFFFFFFFFFFFFFFFFFFFFFFFFF  
@A00155:342:HHGFNDSXY:1:1412:10945:17033 2:N:0:GAACCTAG+TCCGCATA  
GTGAACAAGCCCGGAGTACATCTCCTTTGGAAGTAGGAGACCCCTCCGGTCTTGTCCTAACCTCTGTTT  
CGGCAGAGGATACCGTGCTCCACAGCTGTAAGGCTGTGGGCCCGAGAGAAGTCGCTCTCTCTCGCCCT  
+  
FFFFFFFFFFFFFFFFFFFFFFFFFFFFFFFFFFFFFFFFFFFFFFFFFFFFFFFFFFFFFFFFFFFFFFFFFFFFF  
FFFFFFFFFFFFFFFFFFFFFFFFFFFFFFFFFFFFFFFFFFFFFFFFFFFFFFFFFFFFFFFFFFFFFFFFFFFFF  
@A00155:342:HHGFNDSXY:1:1412:21649:17315 2:N:0:GAACCTAG+TCCGCATA  
CCGTCGTTACTCTTTGAGTTGTGTAAGTTTCGTCCTAAAAAGGACTCGTCAGGTAGCCTACTAGACTA  
CGACTTACACGGTAGGTCGTGAACAAGCCCGGAGTACATCTCCTTTGGAAGTAGGAGACCCCTCCGGT  
+  
FFFFFFFFFFFFFFFFFFFFFFFFFFFFFFFFFFFFFFFFFFFFFFFFFFFFFFFFFFFFFFFFFFFFFFFFFFFFF  
FF:FFFFFFFFFFFFFFFFFFFFFFFFFFFFFFFFFFFFFFFFFFFFFFFFFFFFFFFFFFFFFFFFFFFFFFF  
@A00155:342:HHGFNDSXY:1:1413:7943:1532 2:N:0:GAACCTAG+TCCGCATA  
TTGTCCAACCTCTGTTTCGGCAGAGGATACCGTGCTCCACAGCTGTAAGGCTGTGGGCCCGAGAGAAG  
TCGCTCTCTCTCGCCCTTCACATCCCTCTCGGCATTGAGATGACCATAGGCCAGAGGTGAGTCCTTAA  
+  
FFFFFFFFFFFFFFFFFFFFFFFFFFFFFFFFFFFFFFFFFFFFFFFFFFFFFFFFFFFFFFFFFFFFFFFFFFFFF  
FFFFFFFFFFFFFFFFFFFFFFFFFFFFFFFFFFFFFFFFFFFFFFFFFFFFFFFFFFFFFFFFFFFFFFFFFFFFF  
@A00155:342:HHGFNDSXY:1:1413:31512:2206 2:N:0:GAACCTAG+TCCGCATA  
GGAGTACATCTCCTTTGGAAGTAGGAGACCCCTCCGGTCTTGTCCTAACCTCTGTTTCGGCAGAGGATA  
CCGTGCTCCACAGCTGTAAGGCTGTGGGCCCGAGAGAAGTCGCTCTCTCTCGCCCTCCACATCCCTCT  
+  
FFFFFFFFFFFFFFFFFFFFFFFFFFFFFFFFFFFFFFFFFFFFFFFFFFFFFFFFFFFFFFFFFFFFFFFFFFFFF  
FFFFFFFFFFFFFFFFFFFFFFFFFFFFFFFFFFFFFFFFFFFFFFFFFFFFFFFFFFFFFFFFFFFFFFFFFFFFF  
@A00155:342:HHGFNDSXY:1:1413:3739:21496 2:N:0:GAACCTAG+TCCGCATA  
GCCCCGAGTACATCTCCTTTGGAAGTAGGAGACCCCTCCGGTCTTGTCCTAACCTCTGTTTCGGCAGAG  
GATACCGTGCTCCACAGCTGTAAGGCTGTGGGCCCGAGAGAAGTCGCTCTCTCTCGCCCTCCACATCC  
+  
FFFFFFFFFFFFFFFFFFFFFFFFFFFFFFFFFFFFFFFFFFFFFFFFFFFFFFFFFFFFFFFFFFFFFFFFFFFFF  
FFFFFFFFFFFFFFFFFFFFFFFFFFFFFFFFFFFFFFFFFFFFFFFFFFFFFFFFFFFFFFFFFFFFFFFFFFFFF  
@A00155:342:HHGFNDSXY:1:1413:30183:34444 2:N:0:GAACCTAG+TCCGCATA  
TGAACAAGCCCGGAGTACATCTCCTTTGGAAGTAGGAGACCCCTCCGGTCTTGTCCTAACCTCTGTTTC  
GGCAGAGGATACCGTGCTCCACAGCTGTAAGGCTGTGGGCCCGAGAGAAGTCGCTCTCTCTCGCC



@A00155:342:HHGFNDSXY:1:1414:11017:2002 2:N:0:GAACCTAG+TCCGCATA  
CGGTTTCGTCTTGGAACGGACTCATCAGGGAGCCTACTAGACTCCGACCGTCATGGGGGTTCAAACC  
CATGCCCGCTACACCGCCTTAGATCAGCTGTGTCCACTTAAGGACTCACCTCTGGCCTATGGTCATC  
+  
FFF,FFFFFFFFFFFFFFFFFFFFFFFFFFFFFFFFFFFFFFFFFFFFFFFFFFFFFFFFFFFFF:FFFFFFFFFFFFFFFFFFFF  
FFFFFFFFFFFFFFFFFFFFFFFFFFFFFFFFFFFFFFFFFFFFFFFFFFFFFFFFFFFFF,FFFFFFFFFFFFFFFFFFFFFFFF:FFFFFFF  
@A00155:342:HHGFNDSXY:1:1414:30002:4100 2:N:0:GAACCTAG+TCCGCATA  
CCGAGTACATCTCCTTTGGAACAAGGAGACCCCTCCGGTCTTGTCCAACCTCTGTTTCGGCAGAGGA  
TACCGTGCTCCACAGCTGTAAGGCTGTGGGCCCGAGAGAAGTCGCTCTCTCTCGCCCTCCACATCCCT  
+  
FFFFFFFFFFFFFFFFFFFFFFFFFFFFFFFFFFFFFFFFFFFFFFFFFFFFFFFFFFFFF:FFFFFFFFFFFFFFFFFFFF  
FFFFFFFFFFFFFFFFFFFFFFFFFFFFFFFFFFFFFFFFFFFFFFFFFFFFFFFFFFFFF:FFFFFFFFFFFFFFFF:FFFFFFFFFFFFFFFFFFFFF  
@A00155:342:HHGFNDSXY:1:1414:7853:27242 2:N:0:GAACCTAG+TCCGCATA  
TCGAAGAGTAACGACGGTTTCGTCTTGGAACGGACTCATCAGGGAGCCTACTAGACTCCGACCGTCA  
TGGGGGTTCAAACCCATGCCCGCCACACCGCCTTAGATCAGCTGTGTCCACTTAAGGACTCACCTCT  
+  
FFFFFFFFFFFFFFFFFFFFFFFFFFFFFFFFFFFFFFFFFFFFFFFFFFFFFFFFFFFFF:FFFFFFFFFFFFFFFFFFFF  
FFFFFFFFFFFFFFFFFFFFFFFFFFFFFFFFFFFFFFFFFFFFFFFFFFFFFFFFFFFFF:FFFFFFFFFFFFFFFF:FFFFFFFFFFFFFFFFFFFFF  
@A00155:342:HHGFNDSXY:1:1415:6867:1047 2:N:0:GAACCTAG+TCCGCATA  
CGGCAAAGGATACCGTGCTCCACAGCTGTAAGGCTGTGGGCCCGAGAGAAGTCGCTCTCTCTCGCCCT  
CCACATCCCTCTCGGCATTGAGATGACCATAGGCCAGAGGTGAGTCCTTAAGTGGACACAG  
+  
FFFFFFFFFFFFFFFFFFFFFFFFFFFFFFFFFFFFFFFFFFFFFFFFFFFFFFFFFFFFF:FFF  
FFFFFFFFFFFFFFFFFFFFFFFFFFFFFFFFFFFFFFFFFFFFFFFFFFFFFFFFFFFFF,FFFFFF:FFFFFFFFFFFFFFFF:FFFFFF:FFF:F  
@A00155:342:HHGFNDSXY:1:1415:10791:17174 2:N:0:GAACCTAG+TCCGCATA  
GAAGTACGAGACCCCTCCGGTCTTGTCCAACCTCTGTTTCGGCAGAGGATACCGTGCTCCACAGCTGT  
AAGGCTGTGGGCCCGAGAGAAGTCGCTCTCTCTCGCCCTCCACATCCCTCTCGGCATTGAGATG  
+  
FF:FFFFFFFFFFFFFFFFFFFFFFFFFFFFFFFFFFFFFFFFFFFFFFFFFFFFF:FFFFFFFFFFFFFFFFFFFF  
FFFFFFFFFFFFFFFFFFFFFFFFFFFFFFFFFFFFFFFFFFFFFFFFFFFFF:FFFFFFFFFFFFF::FFFFFFFF  
@A00155:342:HHGFNDSXY:1:1415:20311:19351 2:N:0:GAACCTAG+TCCGCATA  
CCAACCTCTGTTTCGGCAGAGGATACCGTGCTCCACAGCTGTAAGGCTGTGGGCCCGAGAGAAGTCGC  
TCTCTCTCGCCCTCCACATCCCTCTCGGCATTGAGATGACCATAGGCCAGAGGAGAGTCCTTAAGTGG  
+  
FFFFFFFFFFFFFFFFFFFFFFFFFFFFFFFFFFFFFFFFFFFFFFFFFFFFFFFFFFFFF:FFFFFFFFFFFFFFFFFFFF  
FFFFFFFFFFFFFFFFFFFFFFFFFFFFFFFFFFFFFFFFFFFFFFFFFFFFF,FFFFFFFFF:FFFFFF:FFFFFFFFFFFFF,FFFFFF  
@A00155:342:HHGFNDSXY:1:1416:1877:1297 2:N:0:GAACCTAG+TCCGCATA  
CGGTAGGTCGTGAACAAGCCCGGAGTACATCTCCTTTGGAAGTACGAGACCCCTCCGGTCTTGTCCAA  
CCTCTGTTTCGGCAGAGGATACCGTGCTCCACAGCTGTAAGGCTGTGGGCCCGAGAGAAGTCGCTCTC  
+  
FFFFFFFFFFFFFFFFFFFFFFFFFFFFFFFFFFFFFFFFFFFFFFFFFFFFFFFFFFFFF:FFFF,FFFFFFFFFFFF:FFFFFF:FFFFF  
@A00155:342:HHGFNDSXY:1:1416:15176:6699 2:N:0:GAACCTAG+TCCGCATA  
ATCTCAATGCCGAGAGGGATGTAGAGGGCGAGAGAGAGCGACTTCTCTCGGGCCCACAGCCTTACAGC  
TGTGGAGCACGGTATCCTCTGCCGAAACAGAGGTTGGACAAGACCGGAGGGGTCTCCTAGTTCAAAG  
+  
FFFFFFFFFFFFFFFFFFFFFFFFFFFF,FF:FFFFFFFFFFFFFFFFFFFFFFFFFFFFFFFFFFFFFFFFFFFFFFFFFFFFF  
FFFFFFFFFFFFFFFFFFFFFFFFFFFFFFFFFFFFFFFFFFFFFFFFFFFFF:FFFFFFFFFFFFFFFFFFFFFFFFFFFFFFFFFFFFFFFFFFFFF  
@A00155:342:HHGFNDSXY:1:1416:19144:26256 2:N:0:GAACCTAG+TCCGCATA  
AGGACGAACTTACACAACCTCGTAGAGTAACGACGGTTTCGTCTTGGAACGGACTCATCAGGGAGCC  
TACTAGACTCCGACCGTCATGGGGGTTCAAACCCATGCCCGCCACACCGCCTTAGATCAGCTGTGTC  
+  
FFFFFFF:FFFFFFFFFFFFFFFFFFFFF:FFFFFFFFFFFF:FFFFFFFFFFFFFFFFFFFFFFFFFFFFFFFFFFFFF  
F:FFFFFFFFFFFFFFFFFFFFFFFFFFFFF:FFFFFFFFFFFFFFFFFFFFFFFFFFFFFFFFFFFFFFFFFFFFFFFFFFFFF

@A00155:342:HHGFNDSXY:1:1417:24243:8406 2:N:0:GAACCTAG+TCCGCATA  
GACTTACACGGTAGGTCGTGAACAAGCCCGGAGTACATCTCCTTTGGAAGTAGGAGACCCCTCCGGTC  
TTGTCCAACCTCTGTTTCGGCAGAGGATACCGTGCTCCACAGCTGTAAGGCTGTGGGCCCGAGAGAAG  
+  
FFFFFFFFFFFFFFFFFFFFFFFFFFFFFFFFFFFFFFFFFFFFFFFFFFFFFFFFFFFFFFFFFFFFFFFF  
FFFFFFFFFFFFFFFFFFFFFFFFFFFFFFFFFFFFFFFFFFFFFFFFFFFFFFFFFFFFFFFFFFFFFFFF  
@A00155:342:HHGFNDSXY:1:1417:20347:19132 2:N:0:GAACCTAG+TCCGCATA  
TAGGTCGTGAACAAGCCCGGAGTACATCTCCTTTGGAACCAGGAGACCCCTCCGGTCTTGTCCAACCT  
CTGTTTCGGCAGAGGATACCGTGCTCCACAGCTGTAAGGCTGTGGGCCCGAGAGAAGTCGCTCTCTCT  
+  
FFFFFFFFFFFFFFFFFFFFFFFFFFFFFFFFFFFFFFFFFFFFFFFFFFFFFFFFFFFFFFFFFFFFFFFF  
FFFFFFFFFFFFFFFFFFFFFFFFFFFFFFFFFFFFFFFFFFFFFFFFFFFFFFFFFFFFFFFFFFFFFFFF:  
@A00155:342:HHGFNDSXY:1:1417:20184:23077 2:N:0:GAACCTAG+TCCGCATA  
TAGACTACGACTTACACGGTAGGTCGTGAACAAGCCCGGAGTACATCTCCTTTGGAAGTAGGAGACCC  
CTCCGGTCTTGTCCAACCTCTGTTTCGGCAGAGGATACCGTGCTCCACAGCTGTAAGGCTGTGGGCC  
+  
FFFFFFFFFFFFFFFFFFFFFFFFFFFFFFFFFFFFFFFFFFFFFFFFFFFFFFFFFFFFFFFFFFFFFFFF  
FFFFFFFFFFFFFFFFFFFFFFFFFFFFFFFFFFFFFFFFFFFFFFFFFFFFFFFFFFFFFFFFFFFFFFFF:  
@A00155:342:HHGFNDSXY:1:1418:10402:2096 2:N:0:GAACCTAG+TCCGCATA  
ACCCCTCCGGTCTTGTCCAACCTCTGTTTCGGCAGAGGATACCGTGCTCCACAGCTGTAAGGCTGTGG  
GCCCGAGAGAAGTCGCTCTCTCTCGCCCTCCACATCCCTCTCGGCATTGAGATGACCATAGGCCAGAG  
+  
FFFFFFFFFFFFFFFFFFFFFFFFFFFFFFFFFFFFFFFFFFFFFFFFFFFFFFFFFFFFFFFFFFFFFFFF  
FFFFFFFFFFFFFFFFFFFFFFFFFFFFFFFFFFFFFFFFFFFFFFFFFFFFFFFFFFFFFFFFFFFFFFFF:  
@A00155:342:HHGFNDSXY:1:1418:5810:8641 2:N:0:GAACCTAG+TCCGCATA  
CCGCCACACCGCCTTAGATCAGCTGTGTCCACTTAAGGACTCACCTCTGGCCTATGGTCATCTCAATG  
CCGAGAGGGATGTGGAGGGCGAGAGAGAGCGACTTCTCTCGGGCCACAGCCTTACAGCTGTGGAGCA  
+  
FFFFFFFFFFFFFFFFFFFFFFFFFFFFFFFFFFFFFFFFFFFFFFFFFFFFFFFFFFFFFFFFFFFFFFFF  
FFFFF:FFFF,FFFFFF:FFFFFFFFFFFFFFFFFFFFFFFFFFFFFFFFFFFFFFFFFFFFFFFF:  
@A00155:342:HHGFNDSXY:1:1418:8558:15029 2:N:0:GAACCTAG+TCCGCATA  
GAACTAGGAGACCCCTCCGGTCTTGTCCAACCTCTGTTTCGGCAGAGGATACCGTGCTCCACAGCTGT  
AAGGCTGTGGGCCCGAGAGAAGTCGCTCTCTCTCGCCCTCCACATCCCTCTCGGCATTGAGATGACCA  
+  
FFFFFFFFFFFFFFFFFFFFFFFFFFFFFFFFFFFFFFFFFFFFFFFFFFFFFFFFFFFFFFFFFFFFFFFF  
FFFFFFFFFFFFFFFFFFFFFFFFFFFFFFFFFFFFFFFFFFFFFFFFFFFFFFFFFFFFFFFFFFFFFFFF:  
@A00155:342:HHGFNDSXY:1:1418:5927:19179 2:N:0:GAACCTAG+TCCGCATA  
GACCCCTCCGGTCTTGTCCAACCTCTGTTTCGGCAGAGGATACCGTGCTCCACAGCTGTAAGGCTGTG  
GGCCCGAGAGAAGTCGCTCTCTCTCGCCCTCCACATCCCTCTCGGCATTGAGATGACCATAGGC  
+  
F:FFFFFFFFFFFFFFFFFFFFFFFFFFFFFFFFFFFFFFFFFFFFFFFFFFFFFFFFFFFFFFFF:  
FFFFFFFFFFFFFFFFFFFFFFFFFFFFFFFFFFFFFFFFFFFFFFFFFFFFFFFFFFFFFFFF:  
@A00155:342:HHGFNDSXY:1:1418:24704:23641 2:N:0:GAACCTAG+TCCGCATA  
AAAAGGACTCGTCAGGTAGCCTACTAGACTACGACTTACACGGTAGGTCGTGAACAAGCCCGGAGTAC  
ATCTCCTTTGGAAGTAGGAGACCCCTCCGGTCTTGTCCAACCTCTGTTTCGGCAGAGGATACCGTGCT  
+  
FFFFFFFFFFFFFFFFFFFFFFFFFFFFFFFFFFFFFFFFFFFFFFFFFFFFFFFFFFFFFFFFFFFFFFFF  
FFFFFFFFFFFFFFFFFFFFFFFFFFFFFFFFFFFFFFFFFFFFFFFFFFFFFFFFFFFFFFFFFFFFFFFF:  
@A00155:342:HHGFNDSXY:1:1418:16179:27790 2:N:0:GAACCTAG+TCCGCATA  
GGACTCGTCAGGTAGCCTACTAGACTACGACTTACACGGTAGGTCGTGAACAAGCCCGGAGTACATCT  
CCTTTGGAAGTAGGAGACCCCTCCGGTCTTGTCCAACCTCTGTTTCGGCAGAGGATACCGTGCTCCAC  
+  
FFFFFFFFFFFFFFFFFFFFFFFFFFFFFFFFFFFFFFFFFFFFFFFFFFFFFFFFFFFFFFFFFFFFFFFF  
F:,FFFFFFFFF:FFFFFFFFFFFFFFFFFFFFFFFFFFFFFFFFFFFFFFFFFFFFFFFFFFFFFFFF

```
@A00155:342:HHGFNDSXY:1:1418:20952:28291 2:N:0:GAACCTAG+TCCGCATA  
AAAAGGACTCGTCAGGTAGCCTACTAGACTACGACTTACACGGTAGGTCGTGAACAAGCCCGGAGTAC  
ATCTCCTTTTGAACTAGGAGACCCCTCCGGTCTTGTCCAACCTCTGTTTCGGCAGAGGATACC GTGCT  
+  
FFFFFFFFFFFFFFFFFFFFFFFFFFFFFFFFFFFFFFFFFFFFFFFFFFFFFFFFFFFFFFFFFFFFF  
FFFFFFFFFFFFFFF:FFFFFFFFFFFFFFFFFFFFFFFFFFFFFFFFFFFFFFFFFFFFFFFFFFFFFF:  
@A00155:342:HHGFNDSXY:1:1419:14199:2628 2:N:0:GAACCTAG+TCCGCATA  
ACTACGACTTACACGGTAGGTCGTGAACAAGCCCGGAGTACATCTCCTTTGAACTAGGAGACCCCTC  
CGGTCTTGTCCAACCTCTGTTTCGGCAGAGGATACC GTGCTCCACAGCTGTAAGGCTGTGGGCCCGAG  
+  
FFFFFFFFFFFFFFFFFFF,FFFFFFFFFFFFFFFFFFFFFFFFFFFFFFFFFFFFFFFFFFFFFFFFFFFF  
FFFFFFF:FFFFFFFFFFFFFFFFFFFFFFFFFFFFFFFFFFFFFFFFFFFFFFFFFFFFFFFFFFFFFFF  
@A00155:342:HHGFNDSXY:1:1419:7310:14622 2:N:0:GAACCTAG+TCCGCATA  
GAAACCGTCGTTACTCTTGAGTTGTGTAAGTTTTCGTCCTAAAAAGGACTCGTCAGGTAGCCTACTAG  
ACTACGACTTACACGGTAGGTCGTGAACAAGCCCGGAGTACATCTCCTTTGAACTAGGAGACCCCTC  
+  
FFFFFFFFFFFFFFFFFFF,:FFFFFFFFFFFFFFFFFFFFFFFFFFFFFFFFFFFFFFFFFFFFFFFFFFFF  
:FFFFFFFFFFFFFFFFFFFFFFFFFFFFFFFFFFFFFFFFFFFFFFFFFFFFFFFFFFFFFFF:FF  
@A00155:342:HHGFNDSXY:1:1419:24189:20494 2:N:0:GAACCTAG+TCCGCATA  
CCGCCACACCGCCTTAGATCAGCTGTGTCCACTTAAGGACTCACCTCTGGCCTATGGTCATCTCAATG  
CCGAGAGGGATGTGGAGGGCGAGAGAGAGCGACTTCTCTCGGGCCCACAGCCTTACAGCTGTGGAGCA  
+  
FFFFFFFFFFFFFFFFFFFFFFFFFFFFFFFFFFFFFFFFFFFFFFFFFFFFFFFFFFFFFFFFFFFFF  
FFFFFFFFFFF,FFFFFFFFFFFFFFFFFFFFFFFFFFFFFFFFFFFFFFFFFFFFFFFFFFFFFFFFFFFF  
@A00155:342:HHGFNDSXY:1:1420:31946:21621 2:N:0:GAACCTAG+TCCGCATA  
AGTACATCTCCTTTGAACTAGGAGACCCCTCCGGTCTTGTCCAACCTCTGTTTCGGCAGAGGATACC  
GTGCTCCACAGCTGTAAGGCTGTGGGCCCGAGAGAAGTCGCTCTCTCTCGCCCTCTACATCCCTCTCG  
+  
FFFFFFFFFFFFF,FFFFF,FFFFFFFFFFFFFFFFFFFFFFFFF,:F:FFF:FFFF,F,FFFFFF:FFFF  
FFFFFFFFFFFFFFFFFFFFFFFFF:FFFFFFFFFFFFFFFFFFFFFFFFFFFFFFFFFFFFFFFFFFFFF,  
@A00155:342:HHGFNDSXY:1:1420:31684:25207 2:N:0:GAACCTAG+TCCGCATA  
ACCCCTCCGGTCTTGTCCAACCTCTGTTTCGGCAGAGGATACC GTGCTCCACAGCTGTAAGGCTGTGG  
GCCCGAGAGAAGTCGCTCTCTCTCGCCCTTACATCCCTCTCGGCATTGAGATGACCATAGGCCAGAG  
+  
:FFFFFFFFF:FFFF:FFFFFFFFFFFFFFFFFFFFFFFFFFFFFFFFFFFFFFFFFFFFFFFFFFFFF:FF  
FFFFF:FFFFFFFFFFFFFFFFFFFFF:FFFFFFFFF:FFFFFFFFFFFFFFFFFFFF,FFFFFFFFFFFF,  
@A00155:342:HHGFNDSXY:1:1420:32190:28307 2:N:0:GAACCTAG+TCCGCATA  
TACATCTCCTTTGAACTAGGAGACCCCTCCGGTCTTGTCCAACCTCTGTTTCGGCAGAGGATACCGT  
GCTCCACAGCTGTAAGGCTGTGGGCCCGAGAGAAGTCGCTCTCTCTCGCCCTCCACATCCCTCTCGGC  
+  
FFFFFFFFFFFFFFFFFFFFFFFFFFFFFFFFFFFFFFFFFFFFFFFFFFFFFFFFFFFFFFFFFFFFF  
FFFFFFFFFFFFFFFFFFFFF:FFFFFFFFFFFFFFFFF:FFFFFFFFFFFFFFFFFFFFFFFFFFFFFFFFFFFF  
@A00155:342:HHGFNDSXY:1:1421:4164:7044 2:N:0:GAACCTAG+TCCGCATA  
AACAAAGCCCGGAGTACATCTCCTTTGAACTAGGAGACCCCTCCGGTCTTGTCCAACCTCTGTTTCGG  
CAGAGGATACC GTGCTCCACAGCTGTAAGGCTGTGGGCCCGAGAGAAGTCGCTCTCTCTCGCCCTCCA  
+  
FFFFFFFFFFFFFFFFFFFFFFFFFFFFFFFFFFFFFFFFFFFFFFFFFFFFFFFFFFFFFFFFFFFFF  
FFFFFFFFFFFFFFFFFFFFF:FFFFFFFFFFFFFFFFF:FFFFFFFFFFFFFFFFFFFFFFFFFFFFFFFFFFFF  
@A00155:342:HHGFNDSXY:1:1422:15826:34788 2:N:0:GAACCTAG+TCCGCATA  
AACAAAGCCCGGAGTACATCTCCTTTGAACTAGGAGACCCCTCCGGTCTTGTCCAACCTCTGTTTCGG  
CAGAGGATACC GTGCTCCACAGCTGTAAGGCTGTGGGCCCGAGAGAAGTCGCTCTCTCTCGCCCTCCA  
+
```

@A00155:342:HHGFNDSXY:1:1422:23800:35603 2:N:0:GAACCTAG+TCCGCATA  
AAGGACTCATCAGGTAGCCTACTAGACTACGACTTACACGGTAGGTCGTGAACAAGCCCGGAGTACAT  
CTCCTTTGGAAGTAGGAGACCCCTCCGGTCTTGTCCAACCTCTGTTTCGGCAGAGGATACCGTG  
+  
FFFFFFFFFFFFFFFFFFFFFFFFFFFFFFFFFFFFFFFFFFFFFFFFFFFFFFFFFFFFFFFFFFFFFFFFF:FFFFFFFFFFFFF  
FFFFFFFFFFFFFFFFFFFFFFFFFFFFFFFFFFFFFFFFFFFFFFFFFFFFFFFFFFFFFFFFFFFFFFFFF:FFFFFFFFFFFFFFFFF:FFFFFFFF,FFFFFFFF  
@A00155:342:HHGFNDSXY:1:1422:11749:35837 2:N:0:GAACCTAG+TCCGCATA  
ACTAGGAGACCCCTCCGGTCTTGTCCAACCTCTGTTTCGGCAGAGGATACCGTGCTCCACAGCTGTAA  
GGCTGTGGGCCCAGAGAATTGCTCTCTCTCGCCCTCCACATCCCTCTCGGCATTGAGATGACCATA  
+  
F,:FF,FFFFFF:FFF:FF,F,,FFFFFFFFFFFFFFFF::,FFF:FFFF,FF,FFFFF:,FFFF:::,FF  
:FFF::,,:,F:FFFFFFF,:F,,FFFFF:FF:FFFFFFF:F,FF:F::FFF::,,,,F,F::F,::  
@A00155:342:HHGFNDSXY:1:1423:3974:17581 2:N:0:GAACCTAG+TCCGCATA  
GAGACCCCTCCGGTCTTGTCCAACCTCTGTTTCGGCAGAGGATACCGTGCTCCACAGCTGTAAGGCTG  
TGGGCCCCGAGAGAAGTCGCTCTCTCTCGCCCTCCACATCCCTCTCGGCATTGAGATGACCATAGGCCA  
+  
FFFFFFFFFFFFFFFFFFFFFFFFFFFFFFFFFFFFFFFFFFFFFFFFFFFFFFFFFFFFFFFFFFFFFFFFF  
FFFFFFFFFFFFFFFFFFFFFFFFFFFFFFFFFFFFFFFFFFFFFFFFFFFFFFFFFFFFFFFFFFFFFFFFF:,FFFFFFFFFFFFFFFFFFFFF  
@A00155:342:HHGFNDSXY:1:1425:5954:5384 2:N:0:GAACCTAG+TCCGCATA  
GAAACCGTCGTTACTCTTCGAGTTGTGTAAGTTTCGTCCTAAAAAGGACTCGTCAGGTAGCCTACTAG  
ACTACGACTTACACGGTAGGTCGTGAACAAGCCCGAGTACATCTCCTTTGGAAGTAGGAGACCCCTC  
+  
FFFFF:FFFFFFFF:F:FFFFFFFFFFFFFFFF:F:FFFFFFFFFFFFFFFF:FFFFFFFFFFFFFFFFFFFFFFFFF  
FFFFFFFFFFFFFFFFFFFFFFFFFFFFFFFFFFFFFFFFFFFFFFFFFFFFFFFFFFFFFFFFFFFFFFFFF,FFFFFFFFFFFFF  
@A00155:342:HHGFNDSXY:1:1425:5348:12477 2:N:0:GAACCTAG+TCCGCATA  
GACCCCTCCGGTCTTGTCCAACCTCTGTTTCGGCAGAGGATACCGTGCTCCACAGCTGTAAGGCTGTG  
GGCCCCGAGAGAAGTCGCTCTCTCTCGCCCTCCACATCCCTCTCGGCATTGAGATGACCATAGG  
+  
FFFFFFFFFFFFFFFFFFFFFFFFFFFFFFFFFFFFFFFFFFFFFFFFFFFFFFFFFFFFFFFFFFFFFFFFF  
FFFFFFFFFFFFF:FFFFFFFFFFFFFFFFFFFFFFFFFFFFFFFFFFFFFFFFFFFFFFFFFFFFFFFFF:FFFFFFFFFFFFFFFFF  
@A00155:342:HHGFNDSXY:1:1425:8115:28698 2:N:0:GAACCTAG+TCCGCATA  
GAGACCCCTCCGGTCTTGTCCAACCTCTGTTTCGGCAGAGGATACCGTGCTCCACAGCTGTAAGGCTG  
TGGGCCCCGAGAGAAGTCGCTCTCTCTCGCCCTCCACATCCCTCTCGGCATTGAGATGAC  
+  
FFFFFFFF:FFFFFFFFFFFFFFFFFFFFFFFFFFFFFFFFFFFFFFFFFFFFFFFFFFFFFFFFFFFFFFFFF  
FFFFFFFFFFFFFFFFFFFFFFFFFFFFFFFFFFFFFFFFFFFFFFFFFFFFFFFFFFFFFFFFFFFFFFFFF:FF,:FFFFFF:F  
@A00155:342:HHGFNDSXY:1:1425:24930:33552 2:N:0:GAACCTAG+TCCGCATA  
ACTTACACGGTAGGTCGTGAACAAGCCCGGAGTACATCTCCTTTGGAAGTAGGAGACCCCTCCGGTCT  
TGTCCAACCTCTGTTTCGGCAGAGGATACCGTGCTCCACAGCTGTAAGGCTGTGGGCCCAGAGAAG  
+  
FFFFFFFFFFF:FFFFFFFFFFFFFFFFFFFFFFFFFFFFFFFFFFFFFFFFFFFFFFFFFFFFFFFFFFFFF,FFFFFFFFFFFFFFFFFFFFF  
FFFFFFFFFFFFFFFFFFFFF:FFFFFFFFFFFFFFFFFFFFFFFFFFFFFFFFFFFFFFFFFFFFFFFFF:FFFFF:FFFFFFFFFFFFFFFFF  
@A00155:342:HHGFNDSXY:1:1426:16920:21057 2:N:0:GAACCTAG+TCCGCATA  
TGTCCACTTAAGGACTCTCCTCTGGCCTATGGTCATCTCAATGCCGAGAGGGATGTGGAGGGCGAGAG  
AGAGCGACTTCTCTCGGGCCACAGCCTTACAGCTGTGGAGCACGGTATCCTCTGCCGAAACAGAGGT  
+  
FFFFFFFFFFFFFFFFFFFFFFFFFFFFFFFFFFFFFFFFFFFFFFFFFFFFFFFFFFFFFFFFFFFFFFFFF  
FFFFFFFFFFFFFFFFFFFFFFFFF:FFFFFFF,FFFFFFFFFFFFFFFFFFFFFFFFF,FFFFFFFFFFFFFFFFFFFFF  
@A00155:342:HHGFNDSXY:1:1426:7771:29951 2:N:0:GAACCTAG+TCCGCATA  
GGACTCGTCAGGTAGCCTACTAGACTACGACTTACACGGTAGGTCGTGAACAAGCCCGGAGTACATCT  
CCTTTGGAAGTAGGAGACCCCTCCGGTCTTGTCCAACCTCTGTTTCGGCAGAGGATACCGTGCTCCAC  
+  
FFFFFFFFFFFFFFFFFFFFF:FFFFFFFFFFFFFFFFFFFFFFFFFFFFFFFFFFFFFFFFFFFFFFFFFFFFF  
FFFFFFFFFFFFFFFFFFFFFFFFF:FFFFFFFF,FFFFFFFFFFFFFFFFFFFFFFFFF,FFFFFFFFFFFFFFFFFFFFF  
@A00155:342:HHGFNDSXY:1:1426:7771:29951 2:N:0:GAACCTAG+TCCGCATA  
GGACTCGTCAGGTAGCCTACTAGACTACGACTTACACGGTAGGTCGTGAACAAGCCCGGAGTACATCT  
CCTTTGGAAGTAGGAGACCCCTCCGGTCTTGTCCAACCTCTGTTTCGGCAGAGGATACCGTGCTCCAC  
+  
FFFFFFFFFFFFFFFFFFFFF:FFFFFFFFFFFFFFFFFFFFFFFFFFFFFFFFFFFFFFFFFFFFFFFFFFFFF  
FFFFFFFFFFFFFFFFFFFFFFFFF:FFFFFFFFFFFFFFFFFFFFFFFFFFFFFFFFFFFFFFFFFFFFF

```
@A00155:342:HHGFNDSXY:1:1426:8133:30483 2:N:0:GAACCTAG+TCCGCATA  
GTAAGGCTGTGGGCCCGAGAGAAGTCGCTCTCTCTCGCCCTCCACATCCCTCTCGGCATTGAGATGAC  
CATAGGCCAGAGGTGAGTCCTTAAGTGGACACAGCTGATCTAAGGCGGTGTGGCGGGGCATGGGTTTG  
+  
FFFFFFFFFFFFFFFFFFFFFFFFFFFFFFFFFFFFFFFFFFFFFFFFFFFFFFFFFFFFFFFFFFFFF  
FFFFFFFFFFFFFFFFFFFFFFFFFFFFFFFFFFFFFF,FFFF:FFFFFFFFFFFFFFFFFFFFFFFFFFFFF  
@A00155:342:HHGFNDSXY:1:1426:28438:31203 2:N:0:GAACCTAG+TCCGCATA  
GGCAGAGGATACCGTGCTCCACAGCTGTAAGGCTGTGGGCCCGAGAGAAGTCGCTCTCTCTCGCCCTC  
CACATCCCTCTCGGCATTGAGATGACCATAGGCCAGAGGTGAGTCCTTAAGTGGACACAGCTG  
+  
FFFFFFFFFFFFFFFFFFFFFFFFFFFFFFFFFFFFFFFFFFFFFFFFFFFFFFFFFFFFFFFFFFFFF:FFFFFFFFFFFFFFFFFFFFF  
FFFFFFFFFFFFFFFFFFFFFFFFFFFFFFFFFFFFFFFFFFFFFFFFFFFFFFFFFFFFFFFFFFFFF:  
@A00155:342:HHGFNDSXY:1:1426:8404:36370 2:N:0:GAACCTAG+TCCGCATA  
GAGACCCCTCCGGTCTTGTCCAACCTCTGTTTCGGCAGAGGATACCGTGCTCCACAGCTGTAAGGCTG  
TGGGCCCGAGAGAAGTCGCTCTCTCTCGCCCTCCACATCCCTCTCGGCATTGAGATGACCATAGGCC  
+  
FFFFFFFFFFFFFFFFFFFFFFFFFFFFFFFFFFFFFFFFFFFFFFFFFFFFFFFFFFFFFFFFFFFFF:FFFFFFFFFFFFFFFFFFFFF  
FFFFFFFFFFFFFFFFFFFFFFFFFFFFFFFFFFFFFFFFFFFFFFFFFFFFFFFFFFFFFFFFFFFFF:  
@A00155:342:HHGFNDSXY:1:1427:5385:14826 2:N:0:GAACCTAG+TCCGCATA  
CCCCTCCGGTCTTGTCCAACCTCTGTTTCGGCAGAGGATACCGTGCTCCACAGCTGTAAGGCTGTGG  
CCCGAGAGAAGTCGCTCTCTCTCGCCCTTCACATCCCTCTCGGCATTGAGATGACCATAGGCCAGAG  
+  
FFFFFFFFFFFFFFFFFFFFFFFFFFFFFFFFFFFFFFFFFFFFFFFFFFFFFFFFFFFFFFFFFFFFF:FFFFFFFFFFFFFFFFFFFFF  
FFFFFFFFFFFFFFFFFFFFFFFFFFFFFFFFFFFFFFFFFFFFFFFFFFFFFFFFFFFFFFFFFFFFF:  
@A00155:342:HHGFNDSXY:1:1428:11324:8672 2:N:0:GAACCTAG+TCCGCATA  
AGTACATCTCCTTTGGAACCAGGAGACCCCTCCGGTCTTGTCCAACCTCTGTTTCGGCAGAGGATACC  
GTGCTCCACAGCTGTAAGGCTGTGGGCCCGAGAGAAGTCGCTCTCTCTCGCCCTCCACATCCCTCTCG  
+  
FFFFFFFFFFFFFFFFFFFFFFFFFFFFFFFFFFFFFFFFFFFFFFFFFFFFFFFFFFFFFFFFFFFFF:FFFFFFFFFFFFFFFFFFFFF  
FFFFFFFFFFFFFFFFFFFFFFFFFFFFFFFFFFFFFFFFFFFFFFFFFFFFFFFFFFFFFFFFFFFFF:  
@A00155:342:HHGFNDSXY:1:1428:11379:8985 2:N:0:GAACCTAG+TCCGCATA  
AGTACATCTCCTTTGGAACCAGGAGACCCCTCCGGTCTTGTCCAACCTCTGTTTCGGCAGAGGATACC  
GTGCTCCACAGCTGTAAGGCTGTGGGCCCGAGAGAAGTCGCTCTCTCTCGCCCTCCACATCCCTCTCG  
+  
FFFFFFFFFFFFFFFFFFFFFFFFFFFFFFFFFFFFFFFFFFFFFFFFFFFFFFFFFFFFFFFFFFFFF:FFFFFFFFFFFFFFFFFFFFF  
FFFFFFFFFFFFFFFFFFFFFFFFFFFFFFFFFFFFFFFFFFFFFFFFFFFFFFFFFFFFFFFFFFFFF:  
@A00155:342:HHGFNDSXY:1:1428:30156:13823 2:N:0:GAACCTAG+TCCGCATA  
AAAAGGACTCGTCAGGTAGCCTACTAGACTACGACTTACACGGTAGGTCGTGAACAAGCCCGGAGTAC  
ATCTCCTTTGGAACCAGGAGACCCCTCCGGTCTTGTCCAACCTCTGTTTCGGCAGAGGATACCGTGCT  
+  
FFFFFFFFFFFFFFFFFFFFFFFFFFFFFFFFFFFFFFFFFFFFFFFFFFFFFFFFFFFFFFFFFFFFF:FFFFFFFFFFFFFFFFFFFFF  
:FFFFFFFFFFFFFFFFFFFFFFFFFFFFFFFFFFFFFFFFFFFFFFFFFFFFFFFFFFFFFFFFFFFFF:  
@A00155:342:HHGFNDSXY:1:1428:7572:29763 2:N:0:GAACCTAG+TCCGCATA  
AGAGAGAGCGACTTCTCTCGGGCCACAGCCTTACAGCTGTGGAGCACGGTATCCTCTGCCGAAACAG  
AGGTTGGACAAGACCGGAGGGGTCTCCTGGTTCAAAGGAGATGTACTCCGGGCTTGTTACGACCTA  
+  
FFFFFFFFFFFFFFFFFFFFFFFFFFFFFFFFFFFFFFFFFFFFFFFFFFFFFFFFFFFFFFFFFFFFF:FFFFFFFFFFFFFFFFFFFFF  
FFFFFFFFFFFFFFFFFFFFFFFFFFFFFFFFFFFFFFFF:F:FF:FFFFFFFFFFFFFFFFFFFFFFFFFFFFF,FFFFF  
@A00155:342:HHGFNDSXY:1:1428:7581:29904 2:N:0:GAACCTAG+TCCGCATA  
AGAGAGAGCGACTTCTCTCGGGCCACAGCCTTACAGCTGTGGAGCACGGTATCCTCTGCCGAAACAG  
AGGTTGGACAAGACCGGAGGGGTCTCCTGGTTCAAAGGAGATGTACTCCGGGCTTGTTACGACCTA  
+
```

[illegible]

[illegible]

[illegible]



@A00155:342:HHGFNDSXY:1:1436:29767:2033 2:N:0:GAACCTAG+TCCGCATA  
TGTTGTAAGTTTTTCGTCTCTAAAAAGGACTCGTCAGGTAGCCTACTAGACTACGACTTACACGGTAGGTGCG  
TGAACAAGCCCCGGAGTACATCTCCTTTGGAAGTACCAGAGACCCCTCCGGTCTTGTCCAACCTCTGTTTC  
+  
FFFFFFFFFFFFFFFFFFFFFFFFFFFFFFFFFFFFFFFFFFFFFFFFFFFFFFFFFFFFFFFFFFFFFFFFFFFFF  
FFFFFFFFFFFFFFFFFFFFFFFFFFFFFFFFFFFFFFFFFFFFFFFFFFFFFFFFFFFFFFFFFFFFFFFFFFFF:  
@A00155:342:HHGFNDSXY:1:1436:6876:15687 2:N:0:GAACCTAG+TCCGCATA  
GTGAACAAGCCCCGGAGTACATCTCCTTTGGAACCAGGAGACCCCTCCGGTCTTGTCCAACCTCTGTTT  
CGGCAGAGGATACCGTGCTCCACAGCTGTAAGGCTGTGGGCCCGAGAGAAGTCGCTCTCTCTCGCCCT  
+  
FFFFFFFFFFFFFFFFFFFFFFFFFFFFFFFFFFFFFFFFFFFFFFFFFFFFFFFFFFFFFFFFFFFFFFFFFFFFF  
FFFFFFFFFFFFFFFFFFFFFFFFFFFFFFFFFFFFFFFFFFFFFFFFFFFFFFFFFFFFFFFFFFFFFFFFFFFF:  
@A00155:342:HHGFNDSXY:1:1436:7392:17863 2:N:0:GAACCTAG+TCCGCATA  
AAAAGGACTCGTCAGGTAGCCTACTAGACTACGACTTACACGGTAGGTCTGTAACAAGCCCCGGAGTAC  
ATCTCCTTTGGAACCAGGAGACCCCTCCGGTCTTGTCCAACCTCTGTTTCGGCAGAGGATACCGTGCT  
+  
:FF:FFFFFFFFFFFFFFFFFFFFFFFFFFFFFFFFFFFFFFFFFFFFFFFFFFFFFFFFFFFFFFFFFFFFFF,  
FFFFF, FFFFFF, FFFFFF: FFFFFFFFFFFFFFFFFFFFFFFFFFFFFFFFFFFFFFFFFFFFFFFFFFFFFF  
@A00155:342:HHGFNDSXY:1:1436:17273:18787 2:N:0:GAACCTAG+TCCGCATA  
GAAACCGTCGTTACTCTTCGAGTTGTGTAAGTTTCGTCCTAAAAAGGACTCGTCAGGTAGCCTACTAG  
ACTACGACTTACACGGTAGGTCTGTAACAAGCCCCGGAGTACATCTCCTTTGGAAGTACCAGAGACCCCTC  
+  
FFFFFFFF, FFFFFFFFFF: :FFFFFF, F:FFFF, FFFFFFF:, FFFFFFFFFFFFFFFFFF: FFFFFFFF  
FF: , FFFFFFFFFFFFFFFFFFFFFFFFFFFFFFFFFFFFFFFFFFFFFFFFFFFFFFFFFFFFFFFFFFFFFF:  
@A00155:342:HHGFNDSXY:1:1436:10167:25614 2:N:0:GAACCTAG+TCCGCATA  
CCTACTAGACTACGACTTACACGGTAGGTCTGTAACAAGCCCCGGAGTACATCTCCTTTGGAAGTACCAG  
GACCCCTCCGGTCTTGTCCAACCTCTGTTTCGGCAGAGGATACCGTGCTCCACAGCTGTAAGGCTGTG  
+  
FFFFFFFFFFFFFFFFFFFFFFFFFFFFFFFFFFFFFFFFFFFFFFFFFFFFFFFFFFFFFFFFFFFFFFFFFFFFF  
FFFFFFFFFFFFFFFFFFFFFFFFFFFFFFFFFFFFFFFFFFFFFFFFFFFFFFFFFFFFFFFFFFFFFFFFFFFF:  
@A00155:342:HHGFNDSXY:1:1437:14353:9565 2:N:0:GAACCTAG+TCCGCATA  
AAAAAGGACTCGTCAGGTAGCCTACTAGACTACGACTTACACGGTAGGTCTGTAACAAGCCCCGGAGTA  
CATCTCCTTTGGAACCAGGAGACCCCTCCGGTCTTGTCCAACCTCTGTTTCGGCAGAGGATACCGTGCT  
+  
FFFF: FFFFFFFFFFFFFFFFFFFFFFFFFFFFFFFFFFFFFFFFFFFFFFFFFFFFFFFFFFFFFFFFFFFFFF  
FFFFFFFFFFFFFFFFFFFFFFFFFFFFFFFFFFFFFFFFFFFFFFFFFFFFFFFFFFFFFFFFFFFFFFFFFFFF:  
@A00155:342:HHGFNDSXY:1:1437:30174:22842 2:N:0:GAACCTAG+TCCGCATA  
GTGAACAAGCCCCGGAGTACATCTCCTTTGGAAGTACCAGAGACCCCTCCGGTCTTGTCCAACCTCTGTTT  
CGGCAGAGGATACCGTGCTCCACAGCTGTGAGGCTGTGGGCCCGAGAGAAGTCGCTCTCTCTCGCCCT  
+  
FFFFFFFFFFFFFFFFFFFFFFFFFFFFFFFFFFFFFFFFFFFFFFFFFFFFFFFFFFFFFFFFFFFFFFFFFFFFF  
F: FFFFFFFFFFFFFFFFFFFFFFFFFFFFFFFFFFFFFFFFFFFFFFFFFFFFFFFFFFFFFFFFFFFFFF:  
@A00155:342:HHGFNDSXY:1:1438:31159:13432 2:N:0:GAACCTAG+TCCGCATA  
AAGGACTCGTCAGGTAGCCTACTAGACTACGACTTACACGGTAGGTCTGTAACAAGCCCCGGAGTACAT  
CTCCTTTGGAACCAGGAGACCCCTCCGGTCTTGTCCAACCTCTGTTTCGGCAGAGGATACCGTG  
+  
FFF: FFFFFFFFFFFFFFFFFFFFFFFFFFFFFFFFFFFFFFFFFFFFFFFFFFFFFFFFFFFFFFFFFFFFFF  
FFFFFFFFFFFFFFFFFFFFFFFFFFFFFFFFFFFFFFFFFFFFFFFFFFFFFFFFFFFFFFFFFFFFFFFFFFFF:  
@A00155:342:HHGFNDSXY:1:1438:9598:14199 2:N:0:GAACCTAG+TCCGCATA  
AACTAGGAGACCCCTCCGGTCTTGTCCAACCTCTGTTTCGGCAGAGGATACCGTGCTCCACAGCTGTA  
AGGCTGTGGGCCCGAGAGAAGTCGCTCTCTCTCGCCCTCTACATCCCTCTCGGCATTGAGATGACCAT  
+  
FFFFFFFFFFFFFFFFFFFFFFFFFFFFFFFFFFFFFFFFFFFFFFFFFFFFFFFFFFFFFFFFFFFFFFFFFFFFF  
FFFFFFFFFFFFFFFFFFFFFFFFFFFFFFFFFFFFFFFFFFFFFFFFFFFFFFFFFFFFFFFFFFFFFFFFFFFF:  
@A00155:342:HHGFNDSXY:1:1438:9598:14199 2:N:0:GAACCTAG+TCCGCATA

$+$ 

+

+

+

+

+

 $+$ 

+

+

[illegible]

@A00155:342:HHGFNDSXY:1:1441:9362:14262 2:N:0:GAACCTAG+TCCGCATA  
AAAAGGACTCGTCAGGTAGCCTACTAGACTACGACTTACACGGTAGGTCGTGAACAAGCCCGGAGTAC  
ATCTCCTTTGGAAGTAGGAGACCCCTCCGGTCTTGTCCAACCTCTGTTTCGGCAGAGGATACCGTGCT  
+  
FFF:FFFFFFFFFFFFFFFFFFFFFFFFFFFFFFFFFFFFFFFFFFFFFFFFFFFFFFFFFFFFFFFFFFFFFFFF  
FFFFFFFFFFFFFFFFFFFFFFFFFFFFFFFFFFFFFFFFFFFFFFFFFFFFFFFFFFFFFFFFFFFFFFFF:FFFFFFFF  
@A00155:342:HHGFNDSXY:1:1441:31024:24596 2:N:0:GAACCTAG+TCCGCATA  
ACGACTTACACGGTAGGTCGTGAACAAGCCCGGAGTACATCTCCTTTGGAACCAGGAGACCCCTCCGG  
TCTTGTCCAACCTCTGTTTCGGCAGAGGATACCGTGCTCCACAGCTGTAAGGCTGTGGGCCCGAGAGA  
+  
FFFFFFFFFFFFFFFFFFFFFFFFFFFFFFFFFFFFFFFFFFFFFFFFFFFFFFFFFFFFFFFFFFFFFFFF  
FFFFF:FFFFFFFFF:FFFFFFFFFFFFFFFFFFFFFFFFFFFFFFFFFFFFFFFFFFFFFFFFFFFFFFFF  
@A00155:342:HHGFNDSXY:1:1441:1515:28729 2:N:0:GAACCTAG+TCCGCATA  
TACACGGTAGGTCGTGAACAAGCCCGGAGTACATCTCCTTTGGAAGTAGGAGACCCCTCCGGTCTTGT  
CCAACCTCTGTTTCGGCAGAGGATACCGTGCTCCACAGCTGTAAGGCTGTGGGCCCGAGAGAAGTCGC  
+  
FFFFFFFFFFFFFFFFFFFFFFFFFFFFFFFFFFFFFFFFFFFFFFFFFFFFFFFFFFFFFFFFFFFFFFFF  
FFF:FFFFFFFFFFFFFFFFFFFFFFFFFFFFFFFFFFFFFFFFFFFFFFFFFFFFFFFFFFFFFFFFFFFFFFFF:FFFFF:  
@A00155:342:HHGFNDSXY:1:1442:30391:2143 2:N:0:GAACCTAG+TCCGCATA  
GGACTCGTCAGGTAGCCTACTAGACTACGACTTACACGGTAGGTCGTGAACAAGCCCGGAGTACATCT  
CCTTTGGAAGTAGGAGACCCCTCCGGTCTTGTCCAACCTCTGTTTCGGCAGAGGATACCGTGCTCCAC  
+  
FFFFFFFFFFFFFFFFFFFFFFFFFFFFFFFFFFFFFFFFFFFFFFFFFFFFFFFFFFFFFFFFFFFFFFFF:FFF  
FF:FFFFFFFFFFFFFFFFFFFFFFFFFFFFFFFFFFFFFFFFFFFFFFFFFFFFFFFFFFFFFFFFFFFFFFFF:FFFFFFFF  
@A00155:342:HHGFNDSXY:1:1442:1976:3286 2:N:0:GAACCTAG+TCCGCATA  
AACTAGGAGACCCCTCCGGTCTTGTCCAACCTCTGTTTCGGCAGAGGATACCGTGCTCCACAGCTGTA  
AGGCTGTGGGCCCGAGAGAAGTCGCTCTCTCGCCCTCCACATCCCTCTCGGCATTGAGATGACCC  
+  
FFFFFFFFFFFFFFFFFFFFFFFFFFFFFFFFFFFFFFFFFFFFFFFFFFFFFFFFFFFFFFFFFFFFFFFF:  
FFFFFFFFFFFFFFFFFFFFFFFFFFFFFFFFFFFFFFFFFFFFFFFFFFFFFFFFFFFFFFFFFFFFFFFF,FFFFFFFF  
@A00155:342:HHGFNDSXY:1:1442:4065:13197 2:N:0:GAACCTAG+TCCGCATA  
TTTCGTCCTAAAAAGGACTCGTCAGGTAGCCTACTAGACTACGACTTACACGGTAGGTCGTGAACAAG  
CCCGGAGTACATCTCCTTTGGAAGTAGGAGACCCCTCCGGTCTTGTCCAACCTCTGTTTCGGCAGAG  
+  
FFF:FFF:FFFFFFFFFFFFFFFFFFFFFFFFFFFFFFFFFFFFFFFFFFFFFFFFFFFFFFFFFFFFFFFF:FFFFF  
FFFFFFFFFFFFFFFFFFFFFFFFFFFFFFFFFFFFFFFFFFFFFFFFFFFFFFFFFFFFFFFFFFFFFFFF  
@A00155:342:HHGFNDSXY:1:1442:17318:14137 2:N:0:GAACCTAG+TCCGCATA  
TCGTTACTCTTCGAGTTGTGTAAGTTTCGTCCTAAAAAGGACTCGTCAGGTAGCCTACTAGACTACGA  
CTTACACGGTAGGTCGTGAACAAGCCCGGAGTACATCTCCTTTGGAAGTAGGAGACCCCTCCGGTCTT  
+  
FFFFFFFFFFFFFFFFFFFFFFFFFFFFFFFFFFFFFFFFFFFFFFFFFFFFFFFFFFFFFFFFFFFFFFFF:FFFFF  
FFFFFFFFFFFFFFFFFFFFFFFFFFFFFFFFFFFFFFFFFFFFFFFFFFFFFFFFFFFFFFFFFFFFFFFF  
@A00155:342:HHGFNDSXY:1:1442:17481:14418 2:N:0:GAACCTAG+TCCGCATA  
TCGTTACTCTTCGAGTTGTGTAAGTTTCGTCCTAAAAAGGACTCGTCAGGTAGCCTACTAGACTACGA  
CTTACACGGTAGGTCGTGAACAAGCCCGGAGTACATCTCCTTTGGAAGTAGGAGACCCCTCCGGTCTT  
+  
FFFFFFFFFFFFFFFFFFFFFFFFFFFFFFFFFFFFFFFFFFFFFFFFFFFFFFFFFFFFFFFFFFFFFFFF  
FFFFFFFFFFFFFFFFFFFFFFFFFFFFFFFFFFFFFFFFFFFFFFFFFFFFFFFFFFFFFFFFFFFFFFFF  
@A00155:342:HHGFNDSXY:1:1442:27299:23030 2:N:0:GAACCTAG+TCCGCATA  
GTGTAAGTTTCGTCCTAAAAAGGACTCGTCAGGTAGCCTACTAGACTACGACTTACACGGTAGGTCGT  
GAACAAGCCCGGAGTACATCTCCTTTGGAAGTAGGAGACCCCTCCGGTCTTGTCCAACCTCTGTTTCG  
+  
:FFFFFFFF:F,FFFFFFFFF,:FFFFFFFFFFFFFFFFFFFFFFFFFFFFFFFFFFFFFFFFFFFFFFFF:FF,FFF:FFFFF  
FFFFFF,F:F:FFFFFF:FFF,:FFF:FFFFFF,FFF,:F:FFFFFFFFFFFFFFFFFFFFFFFF:FFFFFF:

@A00155:342:HHGFNDSXY:1:1442:19425:33191 2:N:0:GAACCTAG+TCCGCATA  
 CACGGTAGGTCGTGAACAAGCCCGGAGTACATCTCCTTTGGAAGTAGGAGACCCCTCCGGTCTTGTCC  
 AACCTCTGTTTCGGCAGAGGATACCGTGCTCCACAGCTGTAAGGCTGTGGGCCCGAGAGAAGTCGCTC  
 +  
 FFFFFFFFFFFFFFFFFFFFFFFFFF:FFFFFFFFFFFFFFFFFFFFFFFF:FFFFFFFFFFFFFFFFFFFFFFFF,FFFFF  
 FFFFFFFFFFFFFFFFFFFFFFFFFF:FFFFFFFFFFFFFFFFFFFFFFFFFFFFFFFFFFFFFFFFFFFFFFFFF  
 @A00155:342:HHGFNDSXY:1:1443:5918:14779 2:N:0:GAACCTAG+TCCGCATA  
 GACTCGTCAGGTAGCCTACTAGACTACGACTTACACGGTAGGTCGTGAACAAGCCCGGAGTACATCTC  
 CTTTGGAAGTAGGAGACCCCTCCGGTCTTGTCCAACCTCTGTTTCGGCAGAGGATACCGTGCTCCACA  
 +  
 FFFFFFFFFFFFFFFFFFFFFFFFFF:FFFFFFFFFFFFFFFFFFFFFFFFFFFFFFFFFFFFFFFFFFFFFFFFF  
 FFFFFFFFFFFFFFFFFFFFFFFFFF:FFFFFFFFFFFFFFFFFFFFFFFFFFFFFFFFFFFFFFFFFFFFFFFFF:FFFFFFFFFFFFF  
 @A00155:342:HHGFNDSXY:1:1443:19479:20635 2:N:0:GAACCTAG+TCCGCATA  
 ACTCTTTGAGTTGTGTAAGTTTCGTCCTAAAAAGGACTCGTCAGGTAGCCTACTAGACTACGACTTAC  
 ACGGTAGGTCGTGAACAAGCCCGGAGTACATCTCCTTTGGAAGTAGGAGACCCCTCCGGTCTTGTCCA  
 +  
 FFFFFFFFFFFFFFFFFFFFFFFFFF:FFFFFFFFFFFFFFFFFFFFFFFFFFFFFFFFFFFFFFFFFFFFFFFFF  
 FFFFFFFFFFFFFFFFFFFFFFFFFF:FFFFFFFFFFFFFFFFFFFFFFFFFFFFFFFFFFFFFFFFFFFFFFFFF:FFFFFFFFFFFFF  
 @A00155:342:HHGFNDSXY:1:1443:5593:35446 2:N:0:GAACCTAG+TCCGCATA  
 AGGTCGTGAACAAGCCCGGAGTACATCTCCATTGGAAGTAGGAGACCCCTCCGGTCTTGTCCAACCTC  
 TGTTCGGCAGAGGATACCGTGCTCCACAGCTGTAAGGCTGTGGGCCCGAGAGAAGTCGCTCTCTCTC  
 +  
 FFFFFFFFFFFFFFFF:FFFFFFFFFFFFFFFFFFFFFFFFFFFFFFFFFFFFFFFFFFFFFFFFFFFFFFFFF:FFFFF  
 FFFFFFFFFFFFFFFFFFFFFFFFFF:FFFFFFFFFFFFFFFFFFFFFFFFFFFFFFFFFFFFFFFFFFFFFFFFF:FFFFFFFFFFFFF  
 @A00155:342:HHGFNDSXY:1:1444:22218:1110 2:N:0:GAACCTAG+TCCGCATA  
 CTCTTTGAGTTGTGTAAGTTTCGTCCTAAAAAGGACTCGTCAGGTAGCCTACTAGACTACGACTTACA  
 CGGTAGGTCGTGAACAAGCCCGGAGTACATCTCCTTTGGAAGTAGGAGACCCCTCCGGTCTTGTCCAA  
 +  
 FFFFFFFFFFFFFFFF:FFFFFFFFFFFFFFFFFFFFFFFFFFFFFFFFFFFFFFFFFFFFFFFFFFFFFFFFF:FFFFFFFFFFFFF  
 FFFFFFFFFFFFFFFFFFFFFFFFFF:FFFFFFFFFFFFFFFFFFFFFFFFFFFFFFFFFFFFFFFFFFFFFFFFF:FFFFFFFFFFFFF  
 @A00155:342:HHGFNDSXY:1:1444:29206:5666 2:N:0:GAACCTAG+TCCGCATA  
 CATCTCCTTTGGAAGTAGGAGACCCCTCCGGTCTTGTCCAACCTCTGTTTCGGCAGAGGATACCGTGC  
 TCCACAGCTGTAAGGCTGTGGGCCCGAGAGAAGTCGCTCTCTCTCGCCCTCCACATCCCTCTCGGCAT  
 +  
 FFFFFFFFFFFFFFFF:FFFFFFFFFFFFFFFFFFFFFFFFFFFFFFFFFFFFFFFFFFFFFFFFFFFFFFFFF:, :FFFFFFFF:F  
 FFFFFFFF,FFFFF: :FFFFFFF,FFFFFFFFFFFFF:FFFF,FFFF:FFFFFFFFFFFF:FFFF:FFFFF  
 @A00155:342:HHGFNDSXY:1:1444:14805:6120 2:N:0:GAACCTAG+TCCGCATA  
 GCGGAGTACATCTCCTTTGGAAGTAGGAGACCCCTCCGGTCTTGTCCAACCTCTGTTTCGGCAGAG  
 GATACCGTGCTCCACAGCTGTAAGGCTGTGGGCCCGAGAGAAGTCGCTCTCTCTCGCCCTCCACATCC  
 +  
 FFFFFFFFFFFFFFFFFFFFFFFFFF:FFFFFFFFFFFFFFFFFFFFFFFFFFFFFFFFFFFFFFFFFFFFFFFFF  
 FFFFFFFFFFFFFFFFFFFFFFFFFF:FFFFFFFFFFFFFFFFFFFFFFFFFFFFFFFFFFFFFFFFFFFFFFFFF:FFFFFFFFFFFFF  
 @A00155:342:HHGFNDSXY:1:1444:31458:12007 2:N:0:GAACCTAG+TCCGCATA  
 CCTACTAGACTACGACTTACACGGTAGGTCGTGAACAAGCCCGGAGTACATCTCCTTTGGAACCAGGA  
 GACCCCTCCGGTCTTGTCCAACCTCTGTTTCGGCAGAGGATACCGTGCTCCACAGCTGTAAGGCTGTG  
 +  
 FFFFFFFFFFFFFFFFFFFFFFFFFF:FFFFFFFFFFFFFFFFFFFFFFFFFFFFFFFFFFFFFFFFFFFFFFFFF  
 FFFFFFFFFFFFFFFFFFFFFFFFFF:FFFFFFFFFFFFFFFFFFFFFFFFFFFFFFFFFFFFFFFFFFFFFFFFF:FFFFFFFFFFFFF  
 @A00155:342:HHGFNDSXY:1:1444:8965:24032 2:N:0:GAACCTAG+TCCGCATA  
 GAAACCGTCGTTACTCTTCGAGTTGTGTAAGTTTCGTCCTAAAAAGGACTCGTCAGGTAGCCTACTAG  
 ACTACGACTTACACGGTAGGTCGTGAACAAGCCCGGAGTACATCTCCTTTGGAACCAGGAGACCCCTC  
 +  
 FFFFFFFFFFFFFFFFFFFFFFFFFF:FFF:FFFFFFFFFFFFFFFFFFFFFFFFFFFFFFFFF  
 FFFFFFFFFFFFFFFFFFFFFFFFFF:FFFFFFFFFFFFFFFFFFFFFFFFFFFFFFFFFFFFFFFFFFFFFFFFF

[illegible]

[illegible]

@A00155:342:HHGFNDSXY:1:1450:16783 2:N:0:GAACCTAG+TCCGCATA  
GTTGTGTAAGTTTTCGTCCTAAAAAGGACTCGTCAGGTAGCCTACTAGACTACGACTTACACGGTAGGT  
CGTGAACAAGCCCCGGAGTACATCTCCTTTGAACTAGGAGACCCCTCCGGTCTTGTC AACCTCTGTT  
+  
FFFFFFFFFFFFFFFFFFFFFFFFFFFFFFFFFFFFFFFFFFFFFFFFFFFFFFFFFFFFFFFFFFFFF:FFF  
FFFFFFFFFFFFFFFFFFFF,FFFFFFFFFFFFFFFFFFFFFFFFFFFFFFFFFFFFFFFFFFFFFFFFFFFFFF:  
@A00155:342:HHGFNDSXY:1:1450:5312:17362 2:N:0:GAACCTAG+TCCGCATA  
CGAACCGTCGTTACTCTTTGAGTTGTGTAAGTTTCGTCTAAAAAGGACTCGTCAGGTAGCCTACTA  
GACTACGACTTACACGGTAGGTCTGTAACAAGCCCCGGAGTACATCTCCTTTGAACTAGGAGACCCC  
+  
FFFFFFFFFFFFFFFFFFFFFFFFFFFFFFFFFFFFFFFFFFFFFFFFFFFFFFFFFFFFFFFFFFFFF:F:FF  
FFFFFFFFFFFFFFFFFFFF,FFFFFFFF,FF:FFFFFFFFFFFFFFFFFFFFFFFFFFFFFFFFFFFFFFFF:  
@A00155:342:HHGFNDSXY:1:1451:10999:4100 2:N:0:GAACCTAG+TCCGCATA  
CCTACTAGACTACGACTTACACGGTAGGTCTGTAACAAGCCCCGGAGTACATCTCCTTTGAACTAGGA  
GACCCCTCCGGTCTTGTC AACCTCTGTTTCGGCAGAGGATACCGTGCTCCACAGCTGTAAGGCTGTG  
+  
FF:FFFFFFFFFFFFFFFFFFFFFFFFFFFFFFFFFFFFFFFFFFFFFFFFFFFFFFFFFFFFFFFFFFFFF  
FFFFFFFFFFFFFFFFFFFFFFFFFFFFFFFFFFFFFFFFFFFFFFFFFFFFFFFFFFFFFFFFFFFFF:  
@A00155:342:HHGFNDSXY:1:1451:11812:5040 2:N:0:GAACCTAG+TCCGCATA  
ACACA ACTCGAAGAGTAACGACGTTTCGTCTTGAACTAGGACTCATCAGGGAGCCTACTAGACTCCG  
ACCGTCATGGGGTTAAAACCCATGCCCGCCACACCGCCTTAGATCAGCTGTGTCCA CTTAAGGACT  
+  
FFFFFFFFFFFFFFFFFFFFFFFFFFFFFFFFFFFFFFFFFFFFFFFFFFFFFFFFFFFFFFFFFFFFF  
FFFFF:FFFFFFFF,FFFFFFFFFFFFFFFFFFFFFFFFFFFFFFFFFFFFFFFFFFFFFFFFFFFFFFFF:  
@A00155:342:HHGFNDSXY:1:1451:4390:11318 2:N:0:GAACCTAG+TCCGCATA  
TTTGAACTAGGAGACCCCTCCGGTCTTGTC AACCTCTGTTTCGGCAGAGGATACCGTGCTCCACAG  
CTGTAAGGCTGTGGGCCCGAGAGAAGTCGCTCTCTCTCGCCCTCCACATCCCTCTCGGCATTGAGATG  
+  
FFFFFFFFFFFFFFFFFFFFFFFFFFFFFFFFFFFFFFFFFFFFFFFFFFFFFFFFFFFFFFFFFFFFF:FF  
FFFFFFFFFFFFFFFFFFFFFFFFFFFFFFFFFFFFFFFFFFFFFFFFFFFFFFFFFFFFFFFFFFFFF:  
@A00155:342:HHGFNDSXY:1:1451:16179:17331 2:N:0:GAACCTAG+TCCGCATA  
GGTAGCCTACTAGACTACGACTTACACGGTAGGTCTGTAACAAGCCCCGGAGTACATCTCCTTTGAACT  
TAGGAGACCCCTCCGGTCTTGTC AACCTCTGTTTCGGCAGAGGATACCGTGCTCCACAGCTGTAAGG  
+  
FFFFFFFFFFFFFFFFFFFFFFFFFFFFFFFFFFFFFFFFFFFFFFFFFFFFFFFFFFFFFFFFFFFFF  
FFFFFFFFFFFFFFFFFFFFFFFFFFFFFFFFFFFFFFFFFFFFFFFFFFFFFFFFFFFFFFFFFFFFF:  
@A00155:342:HHGFNDSXY:1:1451:11840:29418 2:N:0:GAACCTAG+TCCGCATA  
ACTTACACGGTAGGTCTGTAACAAGCCCCGGAGTACATCTCCTTTGAACTAGGAGACCCCTCCGGTCT  
TGTC AACCTCTGTTTCGGCAGAGGATACCGTGCTCCACAGCTGTAAGGCTGTGGGCCCGAGAGAAG  
+  
FFFFFFFFFFFFFFFFFFFFFFFFFFFFFFFFFFFFFFFFFFFFFFFFFFFFFFFFFFFFFFFFFFFFF,FF  
FFFFFFFFFFFF,FFFFF:FF:F:FFFFFFFFFFFFFFFFFFFFFFFFFFFFFFFFFFFFFFFF:FF:FFFF:  
@A00155:342:HHGFNDSXY:1:1451:18213:31657 2:N:0:GAACCTAG+TCCGCATA  
CCGGAGTACATCTCCTTTGAACTAGGAGACCCCTCCGGTCTTGTC AACCTCTGTTTCGGCAGAGGA  
TACCGTGCTCCACAGCTGTAAGGCTGTGGGCCCGAGAGAAGTCGCTCTCTCTCGCCCCCAC  
+  
FFFFFFFFFFFFFFFFFFFFFFFFFFFFFFFFFFFFFFFFFFFFFFFFFFFFFFFFFFFFFFFFFFFFF,  
FFFFFFFF:FFFFFFFFFFFFF:FFFFFFFFFFFF  
@A00155:342:HHGFNDSXY:1:1451:23647:35149 2:N:0:GAACCTAG+TCCGCATA  
GGAGTACATCTCCTTTGAACTAGGAGACCCCTCCGGTCTTGTC AACCTCTGTTTCGGCAGAGGATA  
CCGTGCTCCACAGCTGTAAGGCTGTGGGCCCGAGAGAAGTCGCTCTCTCTCGCCCTCCACATCCCTCT

@A00155:342:HHGFNDSXY:1:1452:30418:1031 2:N:0:GAACCTAG+TCCGCATA  
GTACATCTCCTTTGGAAGTACGAGACCCCTCCGGTCTTGTCCAACCTCTGTTTCGGCAGAGGATACCG  
TGCTCCACAGCTGTAAGGCTGTGGGCCCGAGAGAAGTCGCTCTCTCTCGCCCTCCACATCCCTCTCG  
+  
FFFFFFFFFFFFFFFFFFFFFFFFFFFFFFFFFFFFFFFFFFFFFFFFFFFFFFFFFFFFFFFFFFFFFFFF  
FFFFFFFFFFFFFFFFFFFFFFFFFFFFFFFFFFFFFFFFFFFFFFFFFFFFFFFFFFFFFFFFFFFFFFFF  
@A00155:342:HHGFNDSXY:1:1452:28727:10097 2:N:0:GAACCTAG+TCCGCATA  
GGACTCGTCAGGTAGCCTACTAGACTACGACTTACACGGTAGGTCGTGAACAAGCCCGGAGTACATCT  
CCTTTGGAACCAGGAGACCCCTCCGGTCTTGTCCAACCTCTGTTTCGGCAGAGGATACCGTGCTCCAC  
+  
FFFFFFFFFFFFFFFFFFFFFFFF,FFFF:FFFFFFFFFFFFFFFFFFFFFFFFFFFFFFFFFFFFFFFF  
FFFFFFFFFFFFFFFFFFFF:F:FFFF:FFFFFFFFFFFF:FFFFFFFFFFFFFF:FFFF:FFFFFFFF:FFF  
@A00155:342:HHGFNDSXY:1:1453:15176:11271 2:N:0:GAACCTAG+TCCGCATA  
GGAGTACATCTCCTTTGGAAGTACGAGACCCCTCCGGTCTTGTCCAACCTCTGTTTCGGCAGAGGATA  
CCGTGCTCCACAGCTGTAAGGCTGTGGGCCCGAGAGAAGTCGCTCTCTCTCGCCCTCCACATCCC  
+  
FFFFFFFFFFFFFFFFFFFFFFFFFFFFFFFFFFFFFFFFFFFFFFFFFFFFFFFFFFFFFFFFFFFFFFFF,F  
FFFFFFFFFFFFFFFFFFFFFFFFFFFF:FFFFFFFFFFFF:FFFFFFFFFFFFFFFFFFFFFFFFFFFFFFFF  
@A00155:342:HHGFNDSXY:1:1453:17571:12164 2:N:0:GAACCTAG+TCCGCATA  
TAGCCTACTAGACTACGACTTACACGGTAGGTCGTGAACAAGCCCGGAGTACATCTCCTTTGGAAGT  
GGAGACCCCTCCGGTCTTGTCCAACCTCTGTTTCGGCAGAGGATACCGTGCTCCACAGCTGTAAGGCT  
+  
FFFFFFFFFFFFFFFFFFFFFFFFFFFFFFFFFFFFFFFFFFFFFFFFFFFFFFFFFFFFFFFFFFFFFFFF  
FFFFFFFFFFFFFFFFFFFFFFFFFFFFFFFFFFFFFFFFFFFF:FFFFFFFFFFFFFFFFFFFFFFFFFFFF  
@A00155:342:HHGFNDSXY:1:1454:11695:1172 2:N:0:GAACCTAG+TCCGCATA  
CGGCAGAGGATACCGTGCTCCACAGCTGTAAGGCTGTGGGCCCGAGAGAAGTCGCTCTCTCTCGCCCT  
TCACATCCCTCTCGGCATTGAGATGACCATAGGCCAGAGGTGAGTCCTTAAGTGGACACAGCTGATCT  
+  
F,:FFF:F,FFFFFFFF:FF:FF:F:FFFFFF,FFFF,FF:FFFF,FF:FFF,FFFF:FFFF:FFFF  
FFFFFFFFFFFFFFFFFFFF:F:FFFFFFFFFFFF:FFFF:FFFFFFFFFFFF:FF,FFFF,FFFFFFFF  
@A00155:342:HHGFNDSXY:1:1454:10926:34256 2:N:0:GAACCTAG+TCCGCATA  
TAGACTACGACTTACACGGTAGGTCGTGAACAAGCCCGGAGTACATCTCCTTTGGAAGTACGAGACCC  
CTCCGGTCTTGTCCAACCTCTGTTTCGGCAGAGGATACCGTGCTCCACAGCTGTAAGGCTGTGGGCC  
+  
FFFFFFFFFFFFFFFFFFFFFFFFFFFFFFFFFFFFFFFFFFFFFFFFFFFFFFFFFFFFFFFFFFFFFFFF  
FFFFFFFFFFFFFFFFFFFFFFFFFFFFFFFFFFFFFFFFFFFFFFFFFFFFFFFFFFFFFFFFFFFFFFFF,FFFFFFFF  
@A00155:342:HHGFNDSXY:1:1454:28122:36104 2:N:0:GAACCTAG+TCCGCATA  
AAAAGGACTCGTCAGGTAGCCTACTAGACTACGACTTACACGGTAGGTCGTGAACAAGCCCGGAGTAC  
ATCTCCTTTGGAAGTACGAGACCCCTCCGGTCTTGTCCAACCTCTGTTTCGGCAGAGGATACCGTGCT  
+  
FFFFFFFFFFFFFFFFFFFFFFFFFFFFFFFFFFFFFFFFFFFFFFFFFFFFFFFFFFFFFFFFFFFF:FFFFFFFF  
FFFFFF:FFFFFFFFFFFFFFFFFFFFFFFFFFFFFFFFFFFFFFFFFFFFFFFFFFFFFFFFFFFF:FFFF:FFFF  
@A00155:342:HHGFNDSXY:1:1455:15691:5494 2:N:0:GAACCTAG+TCCGCATA  
GCTCCCTGATGAGTCCGTTCCAAGGACGAAACCGTCGTTACTCTTCGAGTTGTGTAAGTTTCGTCCTA  
AAAAGGACTCGTCAGGTAGCCTACTAGACTACGACTTACACGGTAGGTCGTGAACAAGCCCGGAGTAC  
+  
FFFFFFFFFFFFFFFFFFFF:FFFFFFFFFFFFFFFFFFFF,FFFFFFFF:FFFFFFFFFFFFFFFFFFFF::  
FFF:FFFFFFFFFFFFFFFFFFFFFFFFFFFFFFFFFFFF:FFFFFFFFFFFFFFFF:FFFFFFFFFFFF,FF  
@A00155:342:HHGFNDSXY:1:1455:15808:5603 2:N:0:GAACCTAG+TCCGCATA  
GCTCCCTGATGAGTCCGTTCCAAGGACGAAACCGTCGTTACTCTTCGAGTTGTGTAAGTTTCGTCCTA  
AAAAGGACTCGTCAGGTAGCCTACTAGACTACGACTTACACGGTAGGTCGTGAACAAGCCCGGAGTAC  
+  
FFFFFFFFFFFFFFFFFFFFFFFFFFFFFFFFFFFFFFFFFFFFFFFFFFFFFFFFFFFFFFFFFFFF,FFF,FFFFFF  
FFFFFFFFFFFFFFFFFFFFFFFFFFFF:FFFF,FFFFFFFFFFFF,FFFFFFFFFFFFFFFFFFFF:FFFF



```
@A00155:342:HHGFNDSXY:1:1455:28592:7858 2:N:0:GAACCTAG+TCCGCATA  
TAGCCTACTAGACTACGACTTACACGGTAGGTTCGTGAACAAGCCCCGAGTACATCTCCTTTGGAACCA  
GGAGACCCCCTCCGGTCTTGCCAACCTCTGTTTCGGCAGAGGATACCGTGCTCCACAGCTGTAAGGC  
+  
FFFFFFFFFFFFFFFFFFFFFFFFFFFFFFFFFFFFFFFFFFFFFFFFFFFFFFFFFFFFFFFFFFFFF  
FFFFFFFFFFFFFFFFFFFFFFFFFFFFFFFFFFFFFFFFFFFFFFFFFFFFFFFFFFFFFFFFFFFFF:FFFFFFFFFFFFF  
@A00155:342:HHGFNDSXY:1:1455:14705:25144 2:N:0:GAACCTAG+TCCGCATA  
CACGGTAGGTTCGTGAACAAGCCCCGAGTACATCTCCTTTGGAAGTACCAGACCCCCTCCGGTCTTGTC  
AACCTCTGTTTCGGCAGAGGATACCGTGCTCCACAGCTGTAAGGCTGTGGGCCCGAGAGAAGTCGCTC  
+  
FFFFFFFFFFFFFFFFFFFFFFFFFFFFFFFFFFFFFFFFFFFFFFFFFFFFFFFFFFFFFFFFFFFFF:FFFFFFFFFFFFFFFFFF,  
FFFFFFFFFFFFFFFFFFFFFFFFFFFFFFFFFFFFFFFFFFFFFFFFFFFFFFFFFFFFFFFFFFFFF:FFFFFFFFFFFFFFFFFF  
@A00155:342:HHGFNDSXY:1:1455:10339:26819 2:N:0:GAACCTAG+TCCGCATA  
TAGGAGACCCCCTCCGGTCTTGCCAACCTCTGTTTCGGCAGAGGATACCGTGCTCCACAGCTGTAAGG  
CTGTGGGCCCGAGAGAAGTCGCTCTCTCGCCCTCCACATCCCTCTCGGCATTGAGATGACCATAGG  
+  
FFFFFFFFFFFFFFFFFFFFFFFFFFFFFFFFFFFFFFFFFFFFFFFFFFFFFFFFFFFFFFFFFFFFF  
FFFFFFFFFFFFFFFFFFFFFFFFFFFFFFFFFFFFFFFFFFFFFFFFFFFFFFFFFFFFFFFFFFFFF:FFFFFFFFFFFFFFFFFF  
@A00155:342:HHGFNDSXY:1:1455:23267:33927 2:N:0:GAACCTAG+TCCGCATA  
GGACTCGTCAGGTAGCCTACTAGACTACGACTTACACGGTAGGTTCGTGAACAAGCCCCGAGTACATCT  
CCTTTGGAAGTACCAGACCCCCTCCGGTCTTGCCAACCTCTGTTTCGGCAGAGGATACCGTGCTCCAC  
+  
FFFFFFFFFFFFFFFFFFFFFFFFFFFFFFFFFFFFFFFFFFFFFFFFFFFFFFFFFFFFFFFFFFFFF  
FFFFFFFFFFFFFFFFFFFFFFFFFFFFFFFFFFFFFFFFFFFFFFFFFFFFFFFFFFFFFFFFFFFFF:FFFFFFFFFFFFFFFFFF  
@A00155:342:HHGFNDSXY:1:1456:10601:14465 2:N:0:GAACCTAG+TCCGCATA  
ACGACTTACACGGTAGGTTCGTGAACAAGCCCCGAGTACATCTCCTTTGGAAGTACCAGACCCCCTCCGG  
TCTTGCCAACCTCTGTTTCGGCAGAGGATACCGTGCTCCACAGCAGTAAGGCTGTGGGCCCGAGAGA  
+  
FFFFFFFFFFFFFFFFFFFFFFFFFFFFFFFFFFFFFFFFFFFFFFFFFFFFFFFFFFFFFFFFFFFFF  
FFFFFFFFFFFFFFFFFFFFFFFFFFFFFFFFFFFFFFFFFFFFFFFFFFFFFFFFFFFFFFFFFFFFF:FFFFFFFFFFFFFFFFFF  
@A00155:342:HHGFNDSXY:1:1457:19922:8155 2:N:0:GAACCTAG+TCCGCATA  
GAACTAGGAGACCCCCTCCGGTCTTGCCAACCTCTGTTTCGGCAGAGGATACCGTGCTCCACAGCTGT  
AAGGCTGTGGGCCCGAGAGAAGTCGCTCTCTCGCCCTCTACATCCCTCTCGGCATTGAGATGACCA  
+  
FFFFFFFFFFFFFFFFFFFFFFFFFFFFFFFFFFFFFFFFFFFFFFFFFFFFFFFFFFFFFFFFFFFFF  
FFFFFFFFFFFFFFFFFFFFFFFFFFFFFFFFFFFFFFFFFFFFFFFFFFFFFFFFFFFFFFFFFFFFF:FFFFFFFFFFFFFFFFFF  
@A00155:342:HHGFNDSXY:1:1457:27796:25927 2:N:0:GAACCTAG+TCCGCATA  
ACCTCTGTTTCGGCAGAGGATACCGTGCTCCACAGCTGTAAGGCTGTGGGCCCGAGAGAAGTCGCTCT  
CTCTCGCCCTTACATCCCTCTCGGCATTGAGATGACCATAGGCCAGAGGTGAGTCCTTAAGTGGAC  
+  
FFFFFFFFFFFFFFFFFFFFFFFFFFFFFFFFFFFFFFFFFFFFFFFFFFFFFFFFFFFFFFFFFFFFF:  
FFFFFFFFFFFFFFFFFFFFFFFFFFFFFFFFFFFFFFFFFFFFFFFFFFFFFFFFFFFFFFFFFFFFF:FFFFFFFFFFFFFFFFFF  
@A00155:342:HHGFNDSXY:1:1458:1289:14215 2:N:0:GAACCTAG+TCCGCATA  
ACTTACACGGTAGGTTCGTGAACAAGCCCCGAGTACATCTCCTTTGGAAGTACCAGACCCCCTCCGGTCT  
TGCCAACCTCTGTTTCGGCAGAGGATACCGTGCTCCACAGCTGTAAGGCTGTGGGCCCGAGAGAAGT  
+  
FFFFFFFFFFF:FFFFFFFFFFFFFFFFFFFFFFFFFFFFFFFFFFFFFFFFFFFFF:FFFFFFF:FFFFFFFFFFFFFFFFFFFFF  
FFFFFFFFFFFFFFFFFFFFF:FFFFFFFFFFFFFFFFFFFFFFFFFFFFFFFFFFFFFFFFFFFFF:FFFFFFFFFFFFFFFFFF::FF  
@A00155:342:HHGFNDSXY:1:1458:10637:28087 2:N:0:GAACCTAG+TCCGCATA  
ACACGGTAGGTTCGTGAACAAGCCCCGAGTACATCTCCTTTGGAAGTACCAGACCCCCTCCGGTCTTGTC  
CAACCTCTGTTTCGGCAGAGGATACCGTGCTCCACAGCTGTAAGGCTGTGGGCCCGAGAGAAGTCGCT  
+
```



@A00155:342:HHGFNDSXY:1:1461:21070:20760 2:N:0:GAACCTAG+TCCGCATA  
GGACTCGTCAGGTAGCCTACTAGACTACGACTTACACGGTAGGTCGTGAACAAGCCCCGGAGTACATCT  
CCTTTGGAACCAGGAGACCCCTCCGGTCTTGCCAACCTCTGTTTCGGCAGAGGATACCGTGCTCCAC  
+  
FFFFFFFFFFFFFFFFFFFFFFFFFFFFF:FFFFFFFFFFFFFFFFFFFFFFFFFFFFFFFFFFFFFFFFFFFFFF:  
FFFFFFFFF:FFFFFFFFFFFFFFFFFFFFFFFFFFFFFFFFFFFFFFFFFFFFFFFFFFFFFFFFFFFFFFFFF  
@A00155:342:HHGFNDSXY:1:1461:28330:31673 2:N:0:GAACCTAG+TCCGCATA  
GAGTTGTGTAAGTTTCGTCTAAAAAGGACTCGTCAGGTAGCCTACTAGACTACGACTTACACGGTAG  
GTCGTGAACAAGCCCCGGAGTACATCTCCTTTGGAAGTACAGACCCCTCCGGTCTTGCCAACCTCTG  
+  
FFFFFFFFFFFFFFFFFFFFFFFFFFFFF:FFFFFFFFFFFFFFFFFFFFFFFFFFFFFFFFFFFFFFFFFFFFFF:FFFFFFFFFFFFF:F  
FFFF:FFFFFF,F:FFFFFFFFFFFFF:FFFFFFFFFFFFFFFFFFFFF:FFFFFFFFFFFFFFFFFFFFF:FFF:FFFFF  
@A00155:342:HHGFNDSXY:1:1461:31060:31767 2:N:0:GAACCTAG+TCCGCATA  
CACGGTAGGTCGTGAACAAGCCCCGGAGTACATCTCCTTTGGAAGTACAGACCCCTCCGGTCTTGTC  
AACCTCTGTTTCGGCAGAGGATACCGTGCTCCACAGCTGTAAGGCTGTGGGCCCGAGAGAAGTCGCTC  
+  
FFFFFFFFFFFFFFFFFFFFFFFFFFFFF:FFFFFFFFFFFFF:FFF,F:FFFFFF:FFFFFFFFFFFFFFFFFFFFF  
FFFFFFFFFFFFFFFFFFFFFFFFFFFFFFFFFFFFFFFFFFFFFFFFFFFFFFFFFFFFFFFFFFFFF:FFFFFFFFFFFFFFFFFFFFF:F  
@A00155:342:HHGFNDSXY:1:1462:5593:3067 2:N:0:GAACCTAG+TCCGCATA  
CTAGGAGACCCCTCCGGTCTTGCCAACCTCTGTTTCGGCAGAGGATACCGTGCTCCACAGCTGTAAG  
GCTGTGGGCCCGAGAGAAGTCGCTCTCTCTCGCCCTCCACATCCCTCTCGGCATTGAGATGACCATAG  
+  
FFFFFFFFFFFFFFFFFFFFFFFFFFFFF:FFFFFFFFFFFFFFFFFFFFFFFFFFFFFFFFFFFFFFFFFFFFFF:FFFFFFF  
FFFFFFFFFFFFFFFFFFFFFFFFFFFFFFFFFFFFFFFFFFFFFFFFFFFFFFFFFFFFFFFFFFFFF:FFFFFFFFFFFFFFFFFFFFF:F  
@A00155:342:HHGFNDSXY:1:1462:9986:24079 2:N:0:GAACCTAG+TCCGCATA  
CGGTCTTGCCAACCTCTGTTTCGGCAGAGGATACCGTGCTCCACAGCTGTAAGGCTGTGGGCCCGAG  
AGAAGTCGCTCTCTCTCGCCCTCCACATCCCTCTCGGCATTGAGATGACCATAGGCCAGAGGAGAGTC  
+  
F:FFF::FF:FFFFFFFF,F:FFF:FFFFFF,F,:FFF:FFFF:FF:FFFF,:F,F,FF  
FFF:FFF,FF:FFFFFFFF:FFFFFFF:FFF:FFFF,:FFFFFF,FFFFFFFF:FF:,FFFFFFF  
@A00155:342:HHGFNDSXY:1:1463:5593:1877 2:N:0:GAACCTAG+TCCGCATA  
ACTCTTCGAGTTGTGTAAGTTTCGTCTAAAAAGGACTCGTCAGGTAGCCTACTAGACTACGACTTAC  
ACGGTAGGTCGTGAACAAGCCCCGGAGTACATCTCCTTTGGAAGTACAGACCCCTCCGGCCTTGTC  
+  
FFFFFFFFFFFFFFFFFFFFFFFFFFFFF:FFFFFFFFFFFFF:FFFFFFFFFFFFF:FFFFFFFFFFFFFFFFFFFFFFFFFFFFF  
FFFFFFFFFFFFFFFFFFFFFFFFFFFFFFFFFFFFF,FFFF,F:FFFFFFFFFFFFFFFFFFFFFFFFFFFFF,FFFFFFF  
@A00155:342:HHGFNDSXY:1:1464:15637:17613 2:N:0:GAACCTAG+TCCGCATA  
AAGGACTCACCTCTGGCCTATGGTCATCTCAATGCCGAGAGGGATGTAGAGGGCGAGAGAGAGCGACT  
TCTCTCGGGCCCACAGCCTTACAGCTGTGGAGCACGGTATCCTCTGCCGAAACAGAGGTTGGAC  
+  
FFFFFFFFFFFFFFFFFFFFFFFFFFFFFFFFFFFFFFFFFFFFFFFFFFFFF:FFFFFFFFFFFFFFFFFFFFFFFFFFFFF  
FFFFFFFFFFFFFFFFFFFFFFFFFFFFFFFFFFFFFFFFFFFFFFFFFFFFFFFFFFFFFFFFFFFFF  
@A00155:342:HHGFNDSXY:1:1464:25012:22514 2:N:0:GAACCTAG+TCCGCATA  
GTTTCGTCTAAAAAGGACTCGTCAGGTAGCCTACTAGACTACGACTTACACGGTAGGTCGTGAACAA  
GCCCGGAGTACATCTCCTTTGGAAGTACAGACCCCTCCGGTCTTGCCAACCTCTGTTTCGGCAGAG  
+  
FFFFFFFFFFFFFFFFFFFFFFFFFFFFFFFFFFFFFFFFFFFFFFFFFFFFFFFFFFFFFFFFFFFFF  
FFFFFFFFF,:FFFFFFFFFFFFF,FF:FFFFFFFFFFFFFFFF,F,FFFF:FFFF,FFFFFFFFFFFFF  
@A00155:342:HHGFNDSXY:1:1464:7346:33943 2:N:0:GAACCTAG+TCCGCATA  
CAAGGACGAAACCGTCGTTACTCTACGAGTTGTGTAAGTTTCGTCTAAAAAGGACTCGTCAGGTAGC  
CTACTAGACTACGACTTACACGGTAGGTCGTGAACAAGCCCCGGAGTACATCTCCTTTGGAAGTACAG

@A00155:342:HHGFNDSXY:1:1464:28103:36198 2:N:0:GAACCTAG+TCCGCATA  
GTACATCTCCTTTGGAAGTAGGAGACCCCTCCGGTCTTGTC AACCTCTGTTTCGGCAGAGGATACCG  
TGCTCCACAGCTGTAAGGCTGTGGGCCCGAGAGAAGTCGCTCTCTCTCGCCCTCCACATCCCTCTCGG  
+  
FFFFFFFFFFFFFFFFFFFFFFFFFFFFFFFFFFFFFFFFFFFFFFFFFFFFF:FFFFFFFFFFFFFFFFFFFFFFFFFFFFFFFFFFFFF:FFFF  
FFFFFFFFFFFFFFFFFFFFFFFFFFFFFFFFFFFFFFFFFFFFFFFFFFFFFFF:FFFFFFFFFFFFFFFFFFFFFFFFFFFFFFFFFFFFF  
@A00155:342:HHGFNDSXY:1:1465:25825:11334 2:N:0:GAACCTAG+TCCGCATA  
ACGGTAGGTCGTGAACAAGCCCGAGTACATCTCCTTTGGAAGTAGGAGACCCCTCCGGTCTTGTC CA  
ACCTCTGTTTCGGCAGAGGATACCGTGCTCCACAGCTGTAAGGCTGTGGGCCCGAGAGAAGTCGCTCT  
+  
FFFFFFFFFFFFFFFFFFFFFFFFFFFFFFFFFFFFFFFFFFFFFFFFFFFFFFF:FFFFFFFFFFFF::FFFFF  
FFFFFFFFFFFFFFFFFFFFF:FFFFFFFFFFFFFFFFFFFFF:FFFFFFFFFFFFFFFFFFFFFFFFFFFFF: :FFFFFFFFFFFF  
@A00155:342:HHGFNDSXY:1:1465:14904:12900 2:N:0:GAACCTAG+TCCGCATA  
GACTTACACGGTAGGTCGTGAACAAGCCCGAGTACATCTCCTTTGGAAGTAGGAGACCCCTCCGGTC  
TTGTCCAACCTCTGTTTCGGCAGAGGATACCGTGCTCCACAGCTGTAAGGCTGTGGGCCCGAGAGAAG  
+  
FFFFFFFFFFFFFFFFFFFFFFFFFFFFFFFFFFFFFFFFFFFFFFFFFFFFFFF:FFFFFFFFFFFFFFFFFFFFFFFFFFFFF:FFFFFFFFFFFFF  
, FFFFFFFFFFFFFFFFFF:FFFFFFF:FFFFFFFFFFFFFFFFFFFFFFFFFFFFF:FFF:F:FFFFFFFFFFFFFFFFFFFF  
@A00155:342:HHGFNDSXY:1:1465:29713:15906 2:N:0:GAACCTAG+TCCGCATA  
ACGGTAGGTCGTGAACAAGCCCGAGTACATCTCCTTTGGAAGTAGGAGACCCCTCCGGTCTTGTC CA  
ACCTCTGTTTCGGCAGAGGATACCGTGCTCCACAGCTGTAAGGCTGTGGGCCCGAGAGAAGTCGCTC  
+  
FFFFFFFFFFFFFFFFFFFFF:, FFFFFFFFFFFFFFFFFFFFFFFFFFFFFFFFFFFFFFFFFFFFFFFFFFFFFF:FFFFFFFFFFFF  
FFFF:FF:FFFFF: :FFFFFFFFFFFFFFFFFFFFFFFFFFFFF, FF:F:FFFFFFFFF:FFFFFFFFFFFFFFFFFFFF  
@A00155:342:HHGFNDSXY:1:1465:7473:21136 2:N:0:GAACCTAG+TCCGCATA  
GTTGTGTAAGTTTCGTCTAAAAAGGACTCGTCAGGTAGCCTACTAGACTACGACTTACACGGTAGGT  
CGTGAACAAGCCCGAGTACATCTCCTTTGGAACCAGGAGACCCCTCCGGTCTTGTC CAACCTCTGTT  
+  
FFFFFFF, FFFFFFFFFFFFF:FFFFFFFFFFFF, FFFFFFFFFF:FFFFFFFFFFFFFFFFFFFFFFFFFFFFF: F  
FFFFFFFFFFFFFFFFFFFFFFFFFFFFFFFFFFFFF: :FFFFFFFFFFFFFFFFFFFFF, FFFFF:FFFFF:FFFFF:FF  
@A00155:342:HHGFNDSXY:1:1465:30364:21731 2:N:0:GAACCTAG+TCCGCATA  
TAGGAGACCCCTCCGGTCTTGTC AACCTCTGTTTCGGCAGAGGATACCGTGCTCCACAGCTGTAAGG  
CTGTGGGCCCGAGAGAAGTCGCTCTCTCTCGCCCTCCACATCCCTCTCGGCATTGAGATGACCATAGG  
+  
FFFFFFFFFFFFFFFFFFFFFFFFFFFFFFFFFFFFFFFFFFFFFFFFFFFFF:FFFFFFFFFFFFFFFFFFFFFFFFFFFFF:FFFFFFFFFFFFF  
FFFFFFFFFFFFFFFFFFFFF:FFFFFFFFFFFFFFFFFFFFF:FFFFFFFFF:F:FFFFFFFFFFFFFFFFFFFFFFFFFFFFF  
@A00155:342:HHGFNDSXY:1:1465:3721:32769 2:N:0:GAACCTAG+TCCGCATA  
TACTCTTCGAGTTGTGTAAGTTTCGTCTAAAAAGGACTCGTCAGGTAGCCTACTAGACTACGACTTA  
CACGGTAGGTCGTGAACAAGCCCGAGTACATCTCCTTTGGAAGTAGGAGACCCCTCCGGTCTTGTC C  
+  
FFFFFFFFFFFFFFFFFFFFFFFFFFFFF:FFFFFFFFFFFFFFFFFFFFFFFFFFFFF:FFFFFFFFFFFFFFFFFFFFFFFFFFFFF  
FFFFFFFFFFFFFFFFFFFFF:FFFFFFFFFFFFFFFFFFFFF:FFFFFFFFF:F:FFFFFFFFFFFFFFFFFFFFFFFFFFFFF  
@A00155:342:HHGFNDSXY:1:1466:3043:3286 2:N:0:GAACCTAG+TCCGCATA  
ACGGTAGGTCGTGAACAAGCCCGAGTACATCTCTTTTGGAAGTAGGAGACCCCTCCGGTCTTGTC CA  
ACCTCTGTTTCGGCAGAGGATACCGTGCTCCACAGCTGTAAGGCTGTGGGCCCGAGAGAAGTCGCTCT  
+  
FFFFFFFFFFFFFFFFFFFFFFFFFFFFFFFFFFFFFFFFFFFFFFFFFFFFF:FFFFFFFFFFFFF  
FFFFFFFFFFFFFFFFFFFFF:FFFFFFFFFFFFFFFFFFFFF:FFFFFFFFF:F:FFFFFFFFFFFFFFFFFFFFFFFFFFFFF  
@A00155:342:HHGFNDSXY:1:1466:28565:6151 2:N:0:GAACCTAG+TCCGCATA  
TTCGTCTTGGAACGACTCATCAGGGAGCCTACTAGACTCCGACCGTCATGGGGGTTCAAACCCATG  
CCCCACCACACCGCCTTAGATCAGCTGTGTCCACTTAAGGACTCACCTCTGGCCTATGGTCATCTCA  
+  
:FFFFFFFFFFFFF:FFFFFFFFF:FFFFFFFFF:FFF:FFFFFFF:FFFFFFF:FFF:FFFFFFFFFFFFFFFFF:  
FFFFFFFFFFFFFFFFFFFFF, FFFFFFFFFFFFFFFFFFFFFF, FFFFFFFFFFFFFFFFFFFFFFFFFFFFFF

[illegible]



[illegible]

[illegible]



@A00155:342:HHGFNDSXY:1:1475:23366:11522 2:N:0:GAACCTAG+TCCGCATA  
ACGACTTACACGGTAGGTCGTGAACAAGCCCGAGTACATCTCCTTTGGAACCAGGAGACCCCTCCGG  
TCTTGTCCAACCTCTGTTTCGGCAGAGGATACCGTGCTCCACAGCTGTAAGGCTGTGGGCCCGAGAGA  
+  
FFFFFFFFFFFFFFFFFFFFFFFFFFFFFFFFFFFFFFFFFFFFFFFFFFFFFFFFFFFFFFFFFFFFFFFF  
FFFFFFFFFFFFFFFFFFFFFFFFFFFFFFFFFFFFFFFFFFFFFFFFFFFFFFFFFFFFFFFFFFFFFFFF  
@A00155:342:HHGFNDSXY:1:1475:4110:16282 2:N:0:GAACCTAG+TCCGCATA  
TGGAACGGACTCATCAGGGAGCCTACTAGACTCCGACCGTCATGGGGGTTCAAACCCATGCCCCACCA  
CACCGCCTTAGATCAGCTGTGTCCACTTAAGGACTCACCTCTGGCCTATGGTCATCTCAATGCCGAGA  
+  
FFFFFFFFFFFFFFFFFFFFFFFFFFFFFFFFFFFFFFFFFFFFFFFFFFFFFFFFFFFFFFFFFFFFFFFF  
FFFFFFFFFFFFFFFFFFFFFFFFFFFFFFFFFFFFFFFFFFFFFFFFFFFFFFFFFFFFFFFFFFFFFFFF  
@A00155:342:HHGFNDSXY:1:1476:22092:28823 2:N:0:GAACCTAG+TCCGCATA  
TCCTAAAAAGGACTCGTCAGGTAGCCTACTAGACTACGACTTACACGGTAGGTCGTGAACAAGCCCGG  
AGTACATCTCCTTTGGAAGTGGAGACCCCTCCGGTCTTGTCCAACCTCTGTTTCGGCAGAGGATACC  
+  
FFFFFFFFFFFFFFFFFFFFFFFFFFFFFFFFFFFFFFFFFFFFFFFFFFFFFFFFFFFFFFFFFFFFFFFF  
FFFFFFFFFFFFFFFFFFFFFFFFFFFFFFFFFFFFFFFFFFFFFFFFFFFFFFFFFFFFFFFFFFFFFFFF  
@A00155:342:HHGFNDSXY:1:1476:4218:29465 2:N:0:GAACCTAG+TCCGCATA  
AGCCCGGAGTACATCTCCTTTGGAAGTGGAGACCCCTCCGGTCTTGTCCAACCTCTGTTTCGGCAGA  
GGATACCGTGCTCCACAGCTGTAAGGCTGTGGGCCCGAGAGAAGTCGCTCTCTCTCGCCCTCCA  
+  
FFFFFFFFFFFFFFFFFFFFFFFFFFFFFFFFFFFFFFFFFFFFFFFFFFFFFFFFFFFFFFFFFFFFFFFF  
FFFFFFFFFFFFFFFFFFFFFFFFFFFFFFFFFFFFFFFFFFFFFFFFFFFFFFFFFFFFFFFFFFFFFFFF  
@A00155:342:HHGFNDSXY:1:1477:13006:1063 2:N:0:GAACCTAG+TCCGCATA  
CGGACTCATCAGGGAGCCTACTAGACTCCGACCGTCATGGGGGTTCAAACCCATGCCCCGCTACACCG  
CCTTAGATCAGCTGTGTCCACTTAAGGACTCACCTCTGGCCTATGGTCATCTCAATGCCGAGAGGGAT  
+  
FFFFFFFFFFFFFFFFFFFFFFFFFFFFFFFFFFFFFFFFFFFFFFFFFFFFFFFFFFFFFFFFFFFFFFFF  
FFFFFFFFFFFFFFFFFFFFFFFFFFFFFFFFFFFFFFFFFFFFFFFFFFFFFFFFFFFFFFFFFFFFFFFF  
@A00155:342:HHGFNDSXY:1:1477:24451:5196 2:N:0:GAACCTAG+TCCGCATA  
GGACTCGTCAGGTAGCCTACTAGACTACGACTTACACGGTAGGTCGTGAACAAGCCCGGAGTACATCT  
CCTTTGGAAGTGGAGACCCCTCCGGTCTTGTCCAACCTCTGTTTCGGCAGAGGATACCGTGCTCCAC  
+  
FFFFFFFFFFFF:FFFFFFFFFFFFFFFFFFFFFFFFFFFFFFFFFFFFFFFFFFFFFFFFFFFFFFFFFFFF  
FFFFFFFFFFFFFFFFFFFFFFFFFFFFFFFFFFFFFFFFFFFFFFFFFFFFFFFFFFFFFFFFFFFFFFFF  
@A00155:342:HHGFNDSXY:1:1477:4417:11240 2:N:0:GAACCTAG+TCCGCATA  
TACGACTTACACGGTAGGTCGTGAACAAGCCCGGAGTACATCTCCTTTGGAAGTGGAGACCCCTCCG  
GTCTTGTCCAACCTCTGTTTCGGCAGAGGATACCGTGCTCCACAGCTGTAAGGCTGTGGGCCCG  
+  
FFFFFFFF:FFFFFFFFFFFFFFFFFFFFFFFFFFFFFFFFFFFFFFFFFFFFFFFFFFFFFFFFFFFFFFFF  
FFFFFFFFFFFFFFFFFFFFFFFFFFFFFFFFFFFFFFFFFFFFFFFFFFFFFFFFFFFFFFFFFFFFFFFF  
@A00155:342:HHGFNDSXY:1:1477:32967:14027 2:N:0:GAACCTAG+TCCGCATA  
CTACGACTTACACGGTAGGTCGTGAACAAGCCCGGAGTACATCTCCTTTGGAAGTGGAGACCCCTCC  
GGTCTTGTCCAACCTCTGTTTCGGCAGAGGATACCGTGCTCCACAGCTGTAAGGCTGTGGGCCCGAGA  
+  
FFFFFFFFFFFFFFFFFFFFFFFFFFFFFFFFFFFFFFFFFFFFFFFFFFFFFFFFFFFFFFFFFFFFFFFF  
FFFF:FFFFFFFFFFFFFFFFFFFFFFFFFFFFFFFFFFFFFFFFFFFFFFFFFFFFFFFFFFFFFFFF  
@A00155:342:HHGFNDSXY:1:1477:28302:23109 2:N:0:GAACCTAG+TCCGCATA  
GACCCCTCCGGTCTTGTCCAACCTCTGTTTCGGCAGAGGATACCGTGCTCCACAGCTGTAAGGCTGTG  
GGCCCGAGAGAAGTCGCTCTCTCTCGCCCTCCACATCCCTCTCGGCATAGAGATGACCATAGGC  
+  
FFFFFFFFFFFFFFFFFFFFFFFFFFFFFFFFFFFFFFFFFFFFFFFFFFFFFFFFFFFFFFFFFFFFFFFF  
FFFFFFFFFFFFFFFFFFFFFFFFFFFFFFFFFFFFFFFFFFFFFFFFFFFFFFFFFFFFFFFFFFFFFFFF  
@A00155:342:HHGFNDSXY:1:1477:28302:23109 2:N:0:GAACCTAG+TCCGCATA  
GACCCCTCCGGTCTTGTCCAACCTCTGTTTCGGCAGAGGATACCGTGCTCCACAGCTGTAAGGCTGTG  
GGCCCGAGAGAAGTCGCTCTCTCTCGCCCTCCACATCCCTCTCGGCATAGAGATGACCATAGGC

@A00155:342:HHGFNDSXY:1:1477:27046:23249 2:N:0:GAACCTAG+TCCGCATA  
GACCCCTCCGGTCTTGTCCAACCTCTGTTTCGGCAGAGGATACCGTGCTCCACAGCTGTAAGGCTGTG  
GGCCCCGAGAGAAGTCGCTCTCTCTCGCCCTCCACATCCCTCTCGGCATAGAGATGACCATAGGC

[illegible]

@A00155:342:HHGFNDSXY:1:1477:16251:32831 2:N:0:GAACCTAG+TCCGCATA  
GAAACCGTCATTACTCTTCGAGTTGTGTAAGTTTCGTCTATAAAAGGACTCGTCAGGTAGCCTACTAG  
ACTACGACTTACACGGTAGGTCGTGAACAAGCCCGGAGTACATCTCCTTTGGAAGTGGAGACCCCTC

[illegible]

@A00155:342:HHGFNDSXY:1:1478:27190:13103 2:N:0:GAACCTAG+TCCGCATA  
CGGTAGGTCGTGAACAAGCCCGGAGTACATCTCCTTTGGAAGTACGAGACCCCTCCGGTCTTGTCCAA  
CCTCTGTTTCGGCAGAGGATACCGTGCTCCACAGCTGTAAGGCTGTGGGCCCCGAGAGAAGTCGCTCTC

[illegible]

@A00155:342:HHGFNDSXY:1:1501:32389:5447 2:N:0:GAACCTAG+TCCGCATA  
AAAAGGACTCGTCAGGTAGCCTACTAGACTACGACTTACACGGTAGGTCGTGAACAAGCCCGGAGTAC  
ATCTCCTTTGGAAGTAGGAGACCCCTCCGGTCTTGTCACCTCTGTTTCGGCAGAGGATACCGTGCT

[illegible]

```
FFFFFFFFFFFFFFFFFFFFFFFFFFFFFFFFFFFFFFFFFFFFFFFFFFFFFFFFFFF:FFFFFFFFFFFFFFFFFFFFFFF,FFFFFFF  
@A00155:342:HHGFNDSXY:1:1501:10682:16673 2:N:0:GAACCTAG+TCCGCATA
```

AAGGACTCGTCAGGTAGCCTACTAGACTACGACTTACACGGTAGGTCGTGAACAAGCCCGGAGTACAT  
CTCCTTTGGAAGTAGGAGACCCCTCCGGTCTTGTCCAACCTCTGTTTCGGCAGAGGATACCGTGCTCC  
+

[illegible]

@A00155:342:HHGFNDSXY:1:1501:15546:17519 2:N:0:GAACCTAG+TCCGCATA  
TAGGAGACCCCTCCGGTCTTGTCCAACCTCTGTTTCGGCAGAGGATACCGTGCTCCACAGCTGTAAGG  
CTGTGGGCCCGAGAGAAGTCGCTCTCTCTCGCCCTCCACATCCCTCTCGGCATTGAGATGACCATAGG

```

+
FFFFFFFFFFFFFFFFFFFF,FF:FFFFFFFFFFFFFFFFFFFFFFFFFFFFFFFFFFFFFFFFFFFFFFFF

```

```

#####:#####
@A00155:342:HHGFNDSXY:1:1501:20030:34428 2:N:0:GAACCTAG+TCCGCATA
+

```

GCCCGGAGTACATCTCCTTTGGAACTAGGAGACCCCCCGGTCTGTGCCAACCTCTGTTTCGGCAGAG  
GATACCGTGCTCCACAGCTGTAAGGCTGTGGGCCCCGAGAGAAGTCGCTCTCTCTCGCCCTCCACATCC  
+

[illegible]

@A00155:342:HHGFNDSXY:1:1502:27796:2910 2:N:0:GAACCTAG+TCCGCATA  
GTTGTGTAAGTTTCGTCCTAAAAAGGACTCGTCAGGTAGCCTACTAGACTACGACTTACACGGTAGGT

CGTGAACAAGCCCGGAGTACATCTCCTTTGGAAGTAGGAGACCCCTCCGGTCTTGTCCAACCTCTGTT  
+

```

FFFF:FFF:FFFFFFFFFFFFFFFF:FFFFFFFFFF:FFFFFFFFFFFFFFFFFFFFFFFFFFFFFFFF:FFFFFFFFFFFFFFF
FFFFFFFFFFFFFFFFFFFFFFFFFFFFFFFFFFFFFFFF:FFFFFFFFFF:FFFFFFFFFFFFFFFFFFFFFFFFFFFFFFFF

```

@A00155:342:HHGFNSXY:1:1503:26558:4492 2:N:0:GAACCTAG+TCCGCATA  
GGACTCGTCAGGTAGCCTACTAGACTACGACTTACACGGTAGGTCGTGAACAAGCCCGGAGTACATCT

CCTTTGGAAGTAGGAGACCCCTCCGGTCTTGTCCAACCTCTGTTTCGGCAGAGGATACCGTGCTCCAC  
+  
-----

```

FFFFFFFF:FFFFFFFFFFFFFFFFFFFFFFFF,FF:FFFFFFFFFFFFFFFFFFFFFFFFFFFFFFFFFFFFFFFFFFFFFFFF
FFFFFFFFFFFFFFFF:F:FFF,FFFFFFFFFF,:FFFFFFFFFF,FFFFFFF:FFFFF,FFFFFFFFFFFFFFFF

```

@A00155:342:HHGFNDSXY:1:1503:11080:7467 2:N:0:GAACCTAG+TCCGCATA  
 GGACTCGTCAGGTAGCCTACTAGACTACGACTTACACGGTAGGTCGTGAACAAGCCTGGAGTACATCT  
 CCTTTGGAAGTAGGAGACCCCTCCGGTCTTGTCCAACCTCTGTTTCGGCAGAGGATACCGTGCTCCAC  
 +  
 FFFFFFFFFFFFFFFFFFFFFFFFFFFFFFFFFFFFFFFFFFFFFFFFFFFFFFFFFFFFFFFFFFFFFFFFFF  
 FF:FFFFFFFFFFFFFFFF:FFFFFFFFFFFFFFFF:FFFF:FFFFFFFFFFFFFFFFFFFFFFFFFFFFFFF  
 @A00155:342:HHGFNDSXY:1:1503:14082:20713 2:N:0:GAACCTAG+TCCGCATA  
 AGTTTCGTCCTAAAAAGGACTCGTCAGGTAGCCTACTAGACTACGACTTACACGGTAGGTCGTGAACA  
 AGCCCGGAGTACATCTCCTTTGGAAGTAGGAGACCCCTCCGGTCTTGTCCAACCTCTGTTTCGGCAGA  
 +  
 FFFFFFFFFF:FFFF,FFFFFFFF:FFFFFFFFFFFFFFFFFFFFFFFFFFFFFFFFFFFFFFFFFFFFFFF  
 FFFFFFFFFFFFFFFFFFFFFFFFFFFFFFFFFFFFFFFFFFFFFFFFFFFFFFFFFFFFFFFFFFFFFFFFFF:FFFFFFFF  
 @A00155:342:HHGFNDSXY:1:1503:13476:29183 2:N:0:GAACCTAG+TCCGCATA  
 GGAGTACATCTCCTTTGGAAGTAGGAGACCCCTCCGGTCTTGTCCAACCTCTGTTTCGGCAGAGGATA  
 CCGTGCTCCACAGCTGTAAGGCTGTGGGCCCGAGAGAAGTCGCTCTCTCTCGCCCTCTACATCCCTCT  
 +  
 FFFFFFFFFFFFFFFFFFFFFFFFFFFFFFFFFFFFFFFFFFFFFFFFFFFFFFFFFFFFFFFFFFFFFFFFFF  
 :FFFFFFFFFFFFFFFFFFFFFFFFFFFFFFFFFFFFFFFFFFFFFFFFFFFFFFFFFFFFFFFFFFFFFFFFF  
 @A00155:342:HHGFNDSXY:1:1503:5529:32142 2:N:0:GAACCTAG+TCCGCATA  
 ACGACTTACACGGTAGGTCGTGAACAAGCCCGGAGTACATCTCCTTTGGAAGTAGGAGACCCCTCCGG  
 TCTTGTCCAACCTCTGTTTCGGCAGAGGATACCGTGCTCCACAGCTGTAAGGCTGTGGGCCCGAGAGA  
 +  
 FFFFFFFFFFFFFFFFFFFFFFFFFFFFFFFFFFFFFFFFFFFFFFFFFFFFFFFFFFFFFFFFFFFFFFFFFF  
 FFF:FFFFFFFFFFFFFFFFFFFFFFFFFFFFFFFFFFFFFFFFFFFFFFFFFFFFFFFFFFFFFFFFFFFFF  
 @A00155:342:HHGFNDSXY:1:1503:22137:35258 2:N:0:GAACCTAG+TCCGCATA  
 CTACTAGACTACGACTTACACGGTAGGTCGTGAACAAGCCCGGAGTACATCTCCTTTGGAAGTAGGAG  
 ACCCCTCCGGTCTTGTCCAACCTCTGTTTCGGCAGAGGATACCGTGCTCCACAGCTGTAAGGCTGTGG  
 +  
 FFFFFFFF:FFFFFFFFFFFFFFFFFFFFFFFFFFFFFFFFFFFFFFFFFFFFFFFFFFFFFFFFFFFFF:F  
 FFF:FFFFFFFFF:FFFFFFFFFFFFFFFFFFFFFFFFFFFFFFFFFFFFFFFFFFFFFFFFFFFFFFFFFFFFF  
 @A00155:342:HHGFNDSXY:1:1503:22318:35258 2:N:0:GAACCTAG+TCCGCATA  
 CTACTAGACTACGACTTACACGGTAGGTCGTGAACAAGCCCGGAGTACATCTCCTTTGGAAGTAGGAG  
 ACCCCTCCGGTCTTGTCCAACCTCTGTTTCGGCAGAGGATACCGTGCTCCACAGCTGTAAGGCTGTGG  
 +  
 FFFFFFFFFFFFFFFFFFFFFFFFFFFFFFFFFFFFFFFFFFFFFFFFFFFFFFFFFFFFFFFFFFFFFFFFFF  
 FFFFFFFFFFFFFF:FFFFFFFFFFFFFFFFFFFF:FFFFF:FFFFFFFFFFFFFFFFFFFFFFFFFFFFFFF  
 @A00155:342:HHGFNDSXY:1:1504:6786:3035 2:N:0:GAACCTAG+TCCGCATA  
 ACATCTCCTTTGGAAGTAGGAGACCCCTCCGGTCTTGTCCAACCTCTGTTTCGGCAGAGGATACCGTG  
 CTCCACAGCTGTAAGGCTGTGGGCCCGAGAGAAGTCGCTCTCTCTCGCCCTCCACATCCCTCTCGGCA  
 +  
 F:FFFFFFFFFFFFFFFFFFFFFFFFFFFFFFFFFFFFFFFFFFFFFFFFFFFFFFFFFFFFFFFFFFFFF  
 FFFFFFFFFFFFFF:F:FFFFF:FFFFFFFFFFFF,FFFFFFFFFFFFFFFFFFFFFFFFFFFFFFFFFFFFF  
 @A00155:342:HHGFNDSXY:1:1504:24722:8703 2:N:0:GAACCTAG+TCCGCATA  
 GGAGTACATCTCCTTTGGAAGTAGGAGACCCCTCCGGTCTTGTCCAACCTCTGTTTCGGCAGAGGATA  
 CCGTGCTCCACAGCTGTAAGGCTGTAGGCCCGAGAGAAGTCGCTCTCTCTCGCCCTCCACATCCCTCT  
 +  
 FFFFFFFFFFFFFFFFFFFFFFFFFFFFFFFFFFFFFFFFFFFFFFFFFFFFFFFFFFFFFFFFFFFFFFFFFF  
 FFF:FFFFFFFFFFFFFFFFFFFFFFFFFFFFFFFFFFFFFFFFFFFFFFFFFFFFFFFFFFFFFFFFFFFFF:FFFFFFFFFFFFF:FFFFFFF  
 @A00155:342:HHGFNDSXY:1:1504:13910:9612 2:N:0:GAACCTAG+TCCGCATA  
 GAAACCGTCGTTACTCTTTGAGTTGTGTAAGTTTCGTCCTAAAAAGGACTCGTCAGGTAGCCTACTAG  
 ACTACGACTTACACGGTAGGTCGTGAACAAGCCCGGAGTACATCTCCTTTGGAAGTAGGAGACCCCTC  
 +  
 FFFFFFFFFFFFFFFFFF,F,FFFFFFFFFFFF:FFFFFFFFF:FFFFF:FFFFFFFFFFFFFFFFFFFFFFFFF  
 FFFFFFFFFFFFFFFFFFFFFFFFFFFFFFFFFFFFFFFFFFFFFFFFFFFFFFFFFFFFFFFFFFFFFFFFFF:FFFFFFFFFFFFF:F  
 @A00155:342:HHGFNDSXY:1:1504:13910:9612 2:N:0:GAACCTAG+TCCGCATA  
 GAAACCGTCGTTACTCTTTGAGTTGTGTAAGTTTCGTCCTAAAAAGGACTCGTCAGGTAGCCTACTAG  
 ACTACGACTTACACGGTAGGTCGTGAACAAGCCCGGAGTACATCTCCTTTGGAAGTAGGAGACCCCTC

@A00155:342:HHGFNDSXY:1:1505:17852:11177 2:N:0:GAACCTAG+TCCGCATA  
GAGACCCCCTCCGGTCTTGTC AACCTCTGTTC GGCAGAGGATACCGTGCTCCACAGCTGTAAGGCTG  
TGGGCCCGAGAGAAGTCGCTCTCTCTCGCCCTCCACATCCCTCTCGGCATTGAGATGACCATAGGCCA  
+  
FFFFFFFFFFFFFFFFFFFFFFFFFFFFFFFFFFFFFFFFFFFFFFFFFFFFFFFFFFFFFFFFFFFFF  
FFFFFFFFFFFFFFFFFFFFFFFFFFFFFFFFFFFFFFFFFFFFFFFFFFFFFFFFFFFFFFFFFFFFF  
@A00155:342:HHGFNDSXY:1:1505:16857:24236 2:N:0:GAACCTAG+TCCGCATA  
GGTAGCCTACTAGACTACGACTTACACGGTAGGTCGTGAACAAGCCCCGAGTACATCTCCTTTGGAAC  
TAGGAGACCCCTCCGGTCTTGTC AACCTCTGTTC GGCAGAGGATACCGTGCTCCACAGCTGTAAG  
+  
F:FFF:FFFFFF,FFFFFF,FFFFFFFF::FF::FFFFFF:,FF:,F:FF,FFFF:F:FF::FF,  
FF:,FFFF::FF:FFFFFFFF,FF::,:FF:FFF,FFF:F,FF,F:F,:,F,F:FFFF::F,FFFF  
@A00155:342:HHGFNDSXY:1:1506:32018:35399 2:N:0:GAACCTAG+TCCGCATA  
TAGGTCGTGAACAAGCCCCGAGTACATCTCCTTTGGAACCAGGAGACCCCTCCGGTCTTGTC AACCT  
CTGTTTCGGCAGAGGATACCGTGCTCCACAGCTGTAAGGCTGTGGGCCCGAGAGAAGTCGCTCTCTCT  
+  
F:FFFFFFFFFFFFFFFFFFFFFFFFFFFFFFFFFFFFFFFFFFFFFFFFFFFFFFFFFFFF:F,FF,FFFFFF  
FFFFFFFFFFFFFFFFFFFFFFFFFFFFFFFF,FFFFFFFFFFFFFF:FFFF,FFFF:FFFFFFFFFFFF:  
@A00155:342:HHGFNDSXY:1:1507:22733:12242 2:N:0:GAACCTAG+TCCGCATA  
GTGTAAGTTTCGTCCTAAAAAGGACTCGTCAGGTAGCCTACTAGACTACGACTTACACGGTAGGTCGT  
GAACAAGCCCCGAGTACATCTCCTTTGGAAGT AGGAGACCCCTCCGGTCTTGTC AACCTCTGTTTCG  
+  
FFFFFFFFFFFFFFFFFFFFFFFFFFFFFFFFFFFFFFFFFFFFFFFFFFFF:FFFFFFFFFFFFFFFFFFFF:F  
FF:FFF:FFFFFFFF:FFFFFFFFFFFFFFFFFFFFFFFFFFFFFFFF,FFFFFFFF:FFFFFFFF  
@A00155:342:HHGFNDSXY:1:1507:18593:30718 2:N:0:GAACCTAG+TCCGCATA  
GGA CTCGTCAGGTAGCCTACTAGACTACGACTTACACGGTAGGTCGTGAACAAGCCCCGAGTACATCT  
CCTTTGGAAGT AGGAGACCCCTCCGGTCTTGTC AACCTCTGTTTCGGCAGAGGATACCGTGCTCCAC  
+  
FFFFFFFFFFFFFFFFFFFFFFFFFFFFFFFFFFFFFFFFFFFFFFFFFFFFFFFFFFFFFFFFFFFFFFFFF  
FFF:FFFFF:FFFFFFFFFFFFFFFFFFFFFFFFFFFFFFFFFFFFFFFFFFFFFFFFFFFFFFFFFFFFF  
@A00155:342:HHGFNDSXY:1:1508:3360:3959 2:N:0:GAACCTAG+TCCGCATA  
GAACTAGGAGACCCCTCCGGTCTTGTC AACCTCTGTTTCGGCAGAGGATACCGTGCTCCACAGCTGT  
AAGGCTGTGGGCCCGAGAGAAGTCGCTCTCTCTCGCCCTCCACATCCCTCTCGGCATTGAGATGAC  
+  
FFFFFFFFFFFFFFFFFFFFFFFFFFFFFFFFFFFFFFFFFFFFFFFFFFFFFFFFFFFFFFFFFFFFFFFFF  
FFFFFFFFFFFFFFFFFFFFFFFF:FFFFFFFFFFFFFFFFFFFFFFFFFFFFFFFFFFFFFFFFFFFFF  
@A00155:342:HHGFNDSXY:1:1508:31530:23312 2:N:0:GAACCTAG+TCCGCATA  
AGTTGTGTAAGTTTCGTCCTAAAAAGGACTCGTCAGGTAGCCTACTAGACTACGACTTACACGGTAGG  
TCGTGAACAAGCCCCGAGTACATCTCCTTTGGAAGT AGGAGACCCCTCCGGTCTTGTC AACCTCTGT  
+  
FFFFFFFFFFFFFFFFFFFFFFFFFFFFFFFFFFFFFFFFFFFFFFFFFFFFFFFFFFFFFFFFFFFFFFFFF  
FFFFFFFFFFFFFFFFFFFFFFFF:FFFFFFFFFFFF:FFFFF:FFFFFFFFFFFFFFFFFFFFFFFFFFFFF  
F:FFFFFFFF,:FFFFFF,F:FFFFFFFFFFF,FFFFFFFF::FFF:FFFFFFFFFFFF::FF:FFFF  
@A00155:342:HHGFNDSXY:1:1508:5005:35900 2:N:0:GAACCTAG+TCCGCATA  
GAACAAGTCCGGAGTACATCTCCTTTGGAAGT AGGAGACCCCTCCGGTCTTGTC AACCTCTGTTTCG  
GCAGAGGATACCGTGCTCCACAGCTGTAAGGCTGTGGGCCCGAGAGAAGTCGCTCTCTCTCGCC  
+  
FFFFFFFFFFFFFFFFFFFFFFFFFFFFFFFFFFFFFFFFFFFFFFFFFFFFFFFFFFFFFFFFFFFFFFFFF  
FFFFFFFFFFFFFFFF:FFFFFFFFFFFFFFFFFFFF:F,FFFFFFFFFFFFFFFFFFFFFFFFFFFF,FF  
@A00155:342:HHGFNDSXY:1:1510:9570:12242 2:N:0:GAACCTAG+TCCGCATA  
GTGAACAAGCCCCGAGTACATTTCTTTGGAAGT AGGAGACCCCTCCGGTCTTGTC AACCTCTGTTTC  
CGGCAGAGGATACCGTGCTCCACAGCTGTAAGGCTGTGGGCCCGAGAGAAGTCGCTCTCTCTCGCCCT  
+  
FFFFFFFFFFFFFFFFFFFFFFFFFFFFFFFFFFFFFFFFFFFFFFFFFFFFFFFFFFFFFFFFFFFFFFFFF  
FFFFFFFFFFFFFFFFFFFFFFFFFFFFFFFFFFFFFFFFFFFFFFFFFFFFFFFFFFFFFFFFFFFFFFFFF  
@A00155:342:HHGFNDSXY:1:1510:9570:12242 2:N:0:GAACCTAG+TCCGCATA

@A00155:342:HHGFNDSXY:1:1510:2248:31657 2:N:0:GAACCTAG+TCCGCATA  
GAAACCGTCGTTACTCTTCGAGTTGTGTAAGTTTCGTCCTAAAAAGGACTCGTCAGGTAGCCTACTAG  
ACTACGACTTACACGGTAGGTCGTGAACAAGCCCCGGAGTACATCTCCTTTGGAAGTGGAGACCCCTC  
+  
FFFFFFFFFFFFFFFFFFFFF:F:FFF:FFFFFFFFFFFFFFFFFFFFFFFFFFFFFFFFFFFFFFFFFFFFF  
FFFFFFFFFFFFFFFFFFFFFFFFFFFFFFFFFFFFFFFFFFFFFFFFFFFFFFFFFFFFFFFFFFFFFFFFFFFF:  
@A00155:342:HHGFNDSXY:1:1510:2926:31861 2:N:0:GAACCTAG+TCCGCATA  
GAAACCGTCGTTACTCTTCGAGTTGTGTAAGTTTCGTCCTAAAAAGGACTCGTCAGGTAGCCTACTAG  
ACTACGACTTACTCGGTAGGTCGTGAACAAGCCCCGGAGTACATCTCCTTTGGAAGTGGAGACCCCTC  
+  
FFFFFFFFFFFFFFFFFF:FFFFFF:FFFFFFFFF:FFFFFFF,FFFFF:FFF:F:FFFFFFFFFFFFFFFFF  
:FFF:FFFFFF:,FFFFFFFFFFFFFFFFF:FFFFFFFFFFFFFFFFFFFF,FFFF:F:,FFFFFFFFFFFFFFFFF  
@A00155:342:HHGFNDSXY:1:1511:3477:11960 2:N:0:GAACCTAG+TCCGCATA  
TAGGAGACCCCTCCGGTCTTGCCAACCTCTGTTTCGGCAGAGGATACCGTGCTCCACAGCTGTAAGG  
CTGTGGGCCCGAGAGAAGTCGCTCTCTCTCGCCCTCCACATCCCTCTCGGCATTGAGATGACCATAGG  
+  
FFFFFFFFFFFFFFFFFFFFFFFFFFFFFFFFFFFFFFFFFFFFFFFFFFFFFFFFFFFFFFFFFFFFFFFFFFFF:  
FFFFFFFFFFFFFFFFFFFFF:FFFF:FF,FFFFFFFFFFFFF:FFFFFFFFFFFFFFFFFFFFFFFFFFFFF  
@A00155:342:HHGFNDSXY:1:1511:32768:14810 2:N:0:GAACCTAG+TCCGCATA  
CCCGGAGTACATCTCCTTTGGAAGTGGAGACCCCTCCGGTCTTGCCAACCTCTGTTTCGGCAGAGG  
ATACCGTGCTCCACAGCTGTAAGGCTGTGGGCCCGAGAGACGTCGCTCTCTCTCGCCCTCCACATCCC  
+  
FFFFFFFFFFFFFFFFFFFFFFFFFFFFFFFFFFFFFFFFFFFFFFFFFFFFFFFFFFFFFFFFFFFFFFFFFFFF,  
:FFFFFFFFFFFFFFFFFFFFF:FFF:FFFF:FFFFFFFFFFFFFFFFF,FFFFFF:FFFFFFFFFFFFFFFFFFFFF  
@A00155:342:HHGFNDSXY:1:1511:27218:32910 2:N:0:GAACCTAG+TCCGCATA  
AGGTAGCCTATTAGACTACGACTTACACGGTAGGTCGTGAACAAGCCCCGGAGTACATCTCCTTTGGAA  
CTAGGAGACCCCTCCGGTCTTGCCAACCTCTGTTTCGGCAGAGGATACCGTGCTCCACAGCTGTAAG  
+  
FFFFFFFFFFFFF:FFFFFFFFFFFFFFFFFFFFF:FFFFFFFFFFFFFFFFF:FFFFFFFFFFFFFFFFFFFFF:FFFFF  
FFFFF:FFFFFFFFFFFFFFFFFFFFFFFFFFFFFFFFFFFFF:FFFFFF:FFFFFFFFF:FFFFFFFFF:FFFFFFFFF  
@A00155:342:HHGFNDSXY:1:1512:22001:5807 2:N:0:GAACCTAG+TCCGCATA  
CGAAACTTACACAACCTCGAAGAGTAACGACGGTTTCGTCCTTGGAACGGACTCATCAGGGAGCCTACT  
AGACTCCGACCGTCATGGGGGTTCAAACCCATGCCCCGCCACACCGCCTTAGATCAGCTGTGTCTACT  
+  
FFFFFFFFFFFFFFFFFFFFFFFFFFFFFFFFFFFFFFFFFFFFFFFFFFFFFFFFFFFFFFFFFFFFFFFFFFFFF  
FFFFFFFFFFFFF:FFFFFFFFFFFFFFFFFFFFFFFFFFFFFFFFFFFFFFFFFFFFFFFFFFFFFFFFFFFFF:  
@A00155:342:HHGFNDSXY:1:1513:8630:19257 2:N:0:GAACCTAG+TCCGCATA  
GGACTCGTCAGGTAGCCTACTAGACTACGACTTACACGGTAGGTCGTGAACAAGCCCCGGAGTACATCT  
CCTTTGGAACCAGGAGACCCCTCCGGTCTTGCCAACCTCTGTTTCGGCAGAGGATACCGTGCTCCAC  
+  
F:FFFF::FFFFFFFFFFFFFFFFFFFFFFFFFFFFFFFFFFFFFFFFFFFFFFFFFFFFFFFFFFFFFFFFFFFFF  
FFFFFFFFFFFFFFFFFFFFF:FFFFFFFFFFFFFFFFFFFFFFFFFFFFFFFFFFFFFFFFFFFFFFFFFFFFF:FFFF:FFFFF  
@A00155:342:HHGFNDSXY:1:1513:17472:22983 2:N:0:GAACCTAG+TCCGCATA  
AAAAGGACTCGTCAGGTAGCCTACTAGACTACGACTTACACGGTAGGTCGTGAACAAGCCCCGGAGTAC  
ATCTCCTTTGGAAGTGGAGACCCCTCCGGTCTTGCCAACCTCTGTTTCGGCAGAGGATACCGTGCA  
+  
FFF,FFFFFFFFFFFFFFFFFFFFFFFFFFFFFFFFFFFFFFFFFFFFFFFFFFFFFFFFFFFFFFFFFFFFFFFFF  
FFFFFFFFFFFFFFFFFFFFFFFFFFFFFFFFFFFFFFFFFFFFFFFFFFFFFFFFFFFFFFFFFFFFFFFFFFFF:FF:  
@A00155:342:HHGFNDSXY:1:1513:11397:31469 2:N:0:GAACCTAG+TCCGCATA  
ACCTCTGTTTCGGCAGAGGATACCGTGCTCCACAGCTGTAAGGCTGTGGGCCCGAGAGAAGTCGCTCT  
CTCTCGCCCTCACATCCCTCTCGGCATTGAGATGACCATAGGCCAGAGGTGAGTCCTTAAGTGGAC  
+  
FFFFFFFFFFFFF:FFFFFFFFFFFFFFFFFFFFFFFFFFFFFFFFFFFFFFFFFFFFFFFFFFFFFFFFFFFFF  
FFFFFFFFFFFFF:FFFFFFFFFFFFFFFFFFFFF,:FFFFFFFFFFFFFFFFFFFFF:FFFF:FF,FFFFFFFFF

@A00155:342:HHGFNDSXY:1:1514:28863:20134 2:N:0:GAACCTAG+TCCGCATA  
AGCCTACTAGACTCCGACCGTCATGGGGGTTCAAACCCATGCCCCACCACACCGCCTTAGATCAGCTG  
TGTCCACTTAAGGACTCACCTCTGGCCTATGGTCATCTCAATGCCGAGAGGGATGTGGAGGGCGAGAG  
+  
,FFFFFFFFFFFFFFFFFFFFFFFFFFFFFFFFFFFFFFFFFFFFFFFFFFFFFFFFFFFFFFFFFFFFFFFF  
FFFFFFFF,FFFFFFFFFFFFFFFFFFFFFFFFFFFFFFFFFFFFFFFFFFFFFFFFFFFFFFFFFFFFFFFF  
@A00155:342:HHGFNDSXY:1:1514:7102:23124 2:N:0:GAACCTAG+TCCGCATA  
GTGTAAGTTTCGTCCTAAAAAGGACTCGTCAGGTAGCCTACTAGACTACGACTTACACGGTAGGTCGT  
GAACAAGCCCGGAGTACATCTCCTTTGGAAGTACGAGACCCCTCCGGTCTTGTCCAACCTCTGTTTC  
+  
FFFFFFFFFFFFFFFFFFFFFFFFFFFFFFFFFFFFFFFFFFFFFFFFFFFFFFFFFFFFFFFFFFFFFFFF  
FFFFFFFFFFFFFFFFFFFFFFFFFFFFFFFFFFFFFFFFFFFFFFFFFFFFFFFFFFFFFFFFFFFFFFFF,FFFFFFFF  
@A00155:342:HHGFNDSXY:1:1515:18747:14951 2:N:0:GAACCTAG+TCCGCATA  
ACGACTTACACGGTAGGTCGTGAACAAGCCCGGAGTACATCTCCTTTGGAAGTACGAGACCCCTCCGG  
TCTTGTCCAACCTCTGTTTCGGCAGAGGATACCGTGCTCCACAGCTGTAAGGCTGTGGGCCCGAGAGA  
+  
FFFFFFFFF:FFFFFFFFFFFFFFFFFFFFFFFFFFFFFFFFFFFFFFFFFFFFFFFFFFFFFFFFFFFFFFFF  
:FF:FFFFFFFFFFFFFFFFFFFFFFFFFFFFFFFFFFFFFFFFFFFFFFFFFFFFFFFFFFFFFFFFFFFF  
@A00155:342:HHGFNDSXY:1:1515:11659:18709 2:N:0:GAACCTAG+TCCGCATA  
TAGGTCGTGAACAAGCCCGGAGTACATCTCCTTTGGAACGAGAGACCCCTCCGGTCTTGTCCAACCT  
CTGTTTCGGCAGAGGATACCGTGCTCCACAGCTGTAAGGCTGTGGGCCCGAGAGAAGTCGCTCTCTCT  
+  
FFFFFFFFFFFFFFFFFFFFFFFFFFFFFFFFFFFFFFFFFFFFFFFFFFFFFFFFFFFFFFFFFFFFFFFF  
FFFFFFFFFFFFFFFFFFFFFFFFFFFFFFFFFFFFFFFFFFFFFFFFFFFFFFFFFFFFFFFFFFFFFFFF,FFFFFFFF  
@A00155:342:HHGFNDSXY:1:1515:19759:20588 2:N:0:GAACCTAG+TCCGCATA  
ACGAAACCGTCGTTACTCTTTGAGTTGTGTAAGTTTCGTCCTAAAAAGGACTCGTCAGGTAGCCTACT  
AGACTACGACTTACACGGTAGGTCGTGAACAAGCCCGGAGTACATCTCCTTTGGAAGTACGAGACCC  
+  
FFFFFFFFFFFFFFFFFFFFFFFF,FFFFFFFFFFFFFFFFFFFFFFFFFFFFFFFFFFFFFFFFFFFFFFFF,FFFF  
FFFFFFFFFFFFFFFFFFFFFFFF:F:F:FFFFFFFFFFFFFFFFFFFFFFFFFFFFFFFFFFFFFFFFFFFFF:FFFFFFFF:FFFFFFFF  
@A00155:342:HHGFNDSXY:1:1517:12029:4413 2:N:0:GAACCTAG+TCCGCATA  
GTCTTGTCCAACCTCTGTTTCGGCAGAGGATACCGTGCTCCACAGCTGTAAGGCTGTGGGCCCGAGAG  
AAGTCGCTCTCTCTCGCCCTCTACATCCCTCTCGGCATTGAGATGACCATAGGCCAGAG  
+  
FFFFFFFFFFFFFFFFFFFFFFFFFFFFFFFFFFFFFFFFFFFFFFFFFFFFFFFFFFFFFFFFFFFFFFFF  
FFFFFFFFFFFFFFFFFFFFFFFFFFFFFFFFFFFFFFFFFFFFFFFFFFFFFFFFFFFFFFFFFFFFFFFF,FFF  
@A00155:342:HHGFNDSXY:1:1517:26937:13542 2:N:0:GAACCTAG+TCCGCATA  
GACTCGTCAGGTAGCCTACTAGACTACGACTTACACGGTAGGTCGTGAACAAGCCCGGAGTACATCTC  
CTTTGGAAGTACGAGACCCCTCCGGTCTTGTCCAACCTCTGTTTCGGCAGAGGATACCGTGCTCCACA  
+  
FFFFFFFFFFFFFFFFFFFFFFFFFFFFFFFFFFFFFFFFFFFFFFFFFFFFFFFFFFFFFFFFFFFFFFFF  
FFFFFFFFFFFFFFFFFFFFFFFFFFFFFFFFFFFFFFFFFFFFFFFFFFFFFFFFFFFFFFFFFFFFFFFF,FFF  
@A00155:342:HHGFNDSXY:1:1517:12554:13745 2:N:0:GAACCTAG+TCCGCATA  
GTTTCGTCCTAAAAAGGACTCGTCAGGTAGCCTACTAGACTACGACTTACACGGTAGGTCGTGAACAA  
GCCCGGAGTACATCTCCTTTGGAAGTACGAGACCCCTCCGGTCTTGTCCAACCTCTGTTTCGGCAGAG  
+  
FFFFFFFFFFFFFFFFFFFFFFFFFFFFFFFFFFFFFFFFFFFFFFFFFFFFFFFFFFFFFFFFFFFFFFFF  
FFFFFFFFFFFFFFF:FFFFFFFFFFFFFFF,FFFFFFF:FFFFFFFFFFFFFFFFFFFFFFFFFFFFFFFFFFFFF  
@A00155:342:HHGFNDSXY:1:1517:24867:18537 2:N:0:GAACCTAG+TCCGCATA  
GTGTAAGTTTCGTCCTAAAAAGGACTCGTCAGGTAGCCTACTAGACTACGACTTACACGGTAGGTCGT  
GAACAAGCCCGGAGTACATCTCCTTTGGAAGTACGAGACCCCTCCGGTCTTGTCCAACCTCTGTTTCG  
+  
FFFFFFFFFFFFFFFFFFFFFFFFFFFFFFFFFFFFFFFFFFFFFFFFFFFFFFFFFFFFFFFFFFFFFFFF  
FFFFFFFFFFFFFFFFFFFFFFFFFFFFFFFFFFFFFFFFFFFFFFFFFFFFFFFFFFFFFFFFFFFFFFFF,FFFFFFFF  
@A00155:342:HHGFNDSXY:1:1517:24867:18537 2:N:0:GAACCTAG+TCCGCATA  
GTGTAAGTTTCGTCCTAAAAAGGACTCGTCAGGTAGCCTACTAGACTACGACTTACACGGTAGGTCGT  
GAACAAGCCCGGAGTACATCTCCTTTGGAAGTACGAGACCCCTCCGGTCTTGTCCAACCTCTGTTTCG

@A00155:342:HHGFNDSXY:1:1518:6686:7435 2:N:0:GAACCTAG+TCCGCATA  
CAGGTAGCCTACTAGACTACGACTTACACGGTAGGTCGTGAACAAGCTCGGAGTACATCTCCTTTGGA  
ACTAGGAGACCCCTCCGGTCTTGTCCAACCTCTGTTTCGGCAGAGGATACCGTGCTCCACAGCTGTAA  
+  
FFFFFFFFFFFFFFFF:FFFFFFFFFFFFFFFFFFFFFFFFFFFFFFFFFFFFFFFFFFFFFFFFFFFFFFFF  
FFFFFFFFFFFFFFFFFFFFFFFFFFFFFFFFFFFFFFFFFFFFFFFFFFFFFFFFFFFFFFFFFFFFFFFF,F  
@A00155:342:HHGFNDSXY:1:1518:23330:9142 2:N:0:GAACCTAG+TCCGCATA  
TACGACTTACACGGTAGGTCGTGAACAAGCCCGAGTACATCTCCTTTGGAAGTACGAGACCCCTCCG  
GTCTTGTCCAACCTCTGTTTCGGCAGAGGATACCGTGCTCCACAGCTGTAAGGCTGTGGGCCCG  
+  
FFFFFFFFFFFFFFFFFFFFFFFFFFFFFFFFFFFFFFFFFFFFFFFFFFFFFFFFFFFFFFFFFFFFFFFF  
FFFFFFFFFFFFFFFFFFFFFFFFFFFFFFFFFFFFFFFFFFFFFFFFFFFFFFFFFFFFFFFFFFFFFFFF,F  
@A00155:342:HHGFNDSXY:1:1519:30400:2253 2:N:0:GAACCTAG+TCCGCATA  
GGAACGGACTCATCAGGGAGCCTACTAGACTCCGACCGTCATGGGGGTTCAAACCCATGCCCCGCCAC  
ACCGCCTTAGATCAGCTGTGTCCACTTAAGGACTCACCTCTGGCCTATGGTCATCTCAATGCCGAGAG  
+  
FFFF:FFFF:FFFFFFFFFFFFFFFF:FFFFFFFF:FFFFFFFF:FFFFFFFF:F:FFFF,FFFFFFFF  
FFFFFF,:FFFFFFFF:FFFFFF:F:FFFF:FFFFFFFF:FFFFFF,FFFFFFFF,FFFF  
@A00155:342:HHGFNDSXY:1:1519:3305:27258 2:N:0:GAACCTAG+TCCGCATA  
AAACTTACAACTCGAAGAGTAACGACGGTTTCGTCTTGAACGGACTCATCAGGGAGCCTACTAG  
ACTCCGACCGTCATGGGGGTTCAAACCCATGCCCCGCCACACCGCCTTAGATCAGCTGTGTCCACTTA  
+  
FFFFFFFFFFFFFFFFFFFFFFFFFFFFFFFFFFFFFFFFFFFFFFFFFFFFFFFFFFFFFFFFFFFFFFFF  
FFFFFFFFFFFF::FFFFFF:FFFFFFFFFFFFFFFFFFFFFFFFFFFFFFFFFFFFFFFFFFFFFFFF  
@A00155:342:HHGFNDSXY:1:1519:15103:29872 2:N:0:GAACCTAG+TCCGCATA  
CTTGTCCAACCTCTGTTTCGGCAGAGGATACCGTGCTCCACAGCTGTAAGGCTGTGGGCCCGAGAGAA  
GTGCTCTCTCTCGCCCTCCACATCCCTCTCGGCATTGAGATGACCATAGGCCAGAGGAGAGTCCTTA  
+  
FF,FFF,FFFF,FFFF:FFFFFFFF:FFFFFFFFFFFFFFFF:,:FFFFFFFF:FFF:FFF:FFFF:FF  
FFFFFFFF:FFFF:F:F:FFFF,FFFFFFFF,FFF:FFF,FFF,FF,F:FF,F,FF::F,:F,:  
@A00155:342:HHGFNDSXY:1:1520:25120:2190 2:N:0:GAACCTAG+TCCGCATA  
GCCTACTAGACTCCGACCGTCATGGGGGTTCAAACCCATGCCCCGCCACACCGCCTTAGATCAGCTGT  
GTCCACTTAAGGACTCACCTCTGGCCTATGGTCATCTCAATGCCGAGAGGGATGTGGAGGGCGAGAGA  
+  
FFFFFFFFFFFFFFFFFFFFFFFFFFFFFFFFFFFFFFFFFFFFFFFFFFFFFFFFFFFFFFFFFFFFFFFF  
FFFFFFFFFFFFFFFFFFFFFFFFFFFFFFFFFFFFFFFFFFFFFFFFFFFFFFFFFFFFFFFFFFFFFFFF  
@A00155:342:HHGFNDSXY:1:1520:17879:6089 2:N:0:GAACCTAG+TCCGCATA  
TCTGTTTCGGCAGAGGATACCGTGCTCCACAGCTGTAAGGCTGTGGGCCCGAGAGAAGTCGCTCTCTC  
TCGCCCTTACATCCCTCTCGGCATTGAGATGACCATAGGCCAGAGGTGAGTCCTTAAGTGGACACAG  
+  
FFFFFFFFFFFFFFFFFFFFFFFFFFFFFFFFFFFFFFFFFFFFFFFFFFFFFFFFFFFFFFFFFFFFFFFF  
FFFFFFFFFFFFFFFFFFFFFFFFFFFFFFFFFFFFFFFFFFFFFFFFFFFFFFFFFFFFFFFFFFFFFFFF  
@A00155:342:HHGFNDSXY:1:1520:15456:8187 2:N:0:GAACCTAG+TCCGCATA  
TCTGTTTCGGCAGAGGATACCGTGCTCCACAGCTGTAAGGCTGTGGGCCCGAGAGAAGTCGCTCTCTC  
TCGCCCTTACATCCCTCTCGGCATTGAGATGACCATAGGCCAGAGGTGAGTCCTTAAGTGGACACAG  
+  
FFFFF,FF:FF:FFFFFFFFFFFFFFFFFFFFFFFFFFFFFFFF:FFFFFFFFFFFFFFFF:FFFF:FFFFFFFF  
FFFFFFFFFFFFFFFFFFFFFFFFFFFFFFFF:FFFFFF:FFFFFFFFFFFFFFFFFFFFFFFF,FFFFFFFF  
@A00155:342:HHGFNDSXY:1:1520:7563:34507 2:N:0:GAACCTAG+TCCGCATA  
AGCCTACTAGACTACGACTTACACGGTAGGTCGTGAACAAGCCCGAGTACATCTCCTTTGGAAGTAC  
GAGACCCCTCCGGTCTTGTCCAACCTCTGTTTCGGCAGAGGATACCGTGCTCCACAGCC  
+  
FFF:FFFFFFFFFFFFFFFFFFFFFFFFFFFFFFFF:FFFFFFFFFFFFFFFFFFFFFFFFFFFFFFFF:FF  
FFFFFFFFFFFFFFFFFFFFFFFFFFFFFFFF:FFFFFF:FFFF:FF,FFFFFFFF

@A00155:342:HHGFNDSXY:1:1521:28863:11616 2:N:0:GAACCTAG+TCCGCATA  
CTGGCCTATGGTCATCTCAATGCCGAGAGGGATGTGAAGGGCGAGAGAGAGCGACTTCTCTCGGGCCC  
ACAGCCTTACAGCTGTGGAGCACGGTATCCTCTGCCGAAACAGAGGTTGGACAAGACCGGAG

```
FFFFFFFFFFFFFFFFFFFFFFFFFFFFFFFFFFFFFFFFFFFFFFFFFFFFFFFFFFFFF:FFFFFFFFFFFFFFFFFFFFFFFFFFFFFFFFFFFFF
FFFFFFFFFFFFFFFFFFFFFFFFFFFFFFFFFFFFFFFFFFFFFFFFFFFFFFFFFFFFFFF:FFFFFFFFFFFFFFFFFFFFFFFFF:FFFF:FFFFFFFFFFFFF:FFFF
```

+

```

FFFFFFFFFFFFFFFFFFFFFFFFFFFFFFFFFFFFFFFFFFFFFFFFFFFFFFFFFFFFFFFFFFFFFFFFFFFFFFFFFFFFFFFF
FFFFFFFF:FFFFFFFFFFFFFFFFFFFFFFFF:FFFFFFF:FFFFF:,FFFFFFFFFFFFFFFFFFFFFFFF:FFFFFFFFFFFF

```

+

```

FFFFFFFF,FFFFFFFFFFFFFFFFFFFFFFFF:FFFFFF:FFFFFFFFFFFFFFFFFFFFFFFF,FFFFFFFFFFFF,FFFF
FFFFFFFFFFFFFFFFFFFFFFFFFFFFFFFF:F:F:FFFFFFFFFFFFFFFFFFFFFFFF:FFFFFFFFF:FFFFFFFFFFFF

```

+

[illegible]

+

[illegible]

+

[illegible] $+$ [illegible] $+$ 

```

: : FFFFFFFFFFFFFFFFFF, FFFFFFFFFF: FFFFF: F: FFFFFFFFFFFFFFFFFF: FFFFF: FFFFFFFFFF
EEEE E E FFFFFFFFFFEE.FFFFFFFE.FFFFFFFE.FFFFFFFFFFFFFFFFFFFFFFFFFFFFFFFFFF.FFFFFE.EE

```

+

[illegible]



@A00155:342:HHGFNDSXY:1:1524:1597:26647 2:N:0:GAACCTAG+TCCGCATA  
GAAACCGTCGTTACTCTTTGAGTTGTGTAAGTTTCGTCCTAAAAAGGACTCGTCAGGTAGCCTACTAG  
ACTACGACTTACACGGTAGGTCGTGAACAAGCCCGGAGTACATCTCCTTTGGAAGTGGGAGACCCCTC  
+  
F,F:FFFFFFFFF::FFFF,FFFFFFFFFFFFFFFFFFFFF:F::F::FF::FFFF:FFFFFFFF:FFFFFF  
:FF:FFFFFFFF:FFFFFFFFFFFFFFFF:FFFF,FFFFFFFF,FFFFFFFFFFFFFFFF,FFF:FFFFFFFF  
@A00155:342:HHGFNDSXY:1:1525:23059:6668 2:N:0:GAACCTAG+TCCGCATA  
AGGACGAAACCGTCGTTACTCTTCGAGTTGTGTAAGTTTCGTCCTAAAAAGGACTCGTCAGGTAGCCT  
ACTAGACTACGACTTACACGGTAGGTCGTGAACAAGCCCGGAGTACATCTCCTTTGGAAGTGGGAGAC  
+  
FFFFFFFFFFFFFFFFFFFFFFFFFFFFFFFF:FFFFFFFFFFFFFFFF:FFFFFFFF:,FFFFFFFFFFFFFFFF,FFFF  
FFFFFFFFFFFFFFFF:FFFFFFFFFFFFFFFFFFFFFFFFFFFFFFFFFFFFFFFFFFFFFFFF:FFFF,FFFF  
@A00155:342:HHGFNDSXY:1:1525:23068:6872 2:N:0:GAACCTAG+TCCGCATA  
AGGACGAAACCGTCGTTACTCTTCGAGTTGTGTAAGTTTCGTCCTAAAAAGGACTCGTCAGGTAGCCT  
ACTAGACTACGACTTACACGGTAGGTCGTGAACAAGCCCGGAGTACATCTCCTTTGGAAGTGGGAGAC  
+  
FFFFFFFFFFFFFFFFFFFFFFFF:FFFFFFFFFFFFFFFF:FFF:FFFF,F:FFFFFFFFFFFFFFFFFFFFFFFF  
FFFFFFFFFFFFFFFFFFFFFFFFFFFFFFFF:FFFF:FFFFFFFFFFFFFFFF:FFFF:FFFFFFFF:FFFF  
@A00155:342:HHGFNDSXY:1:1525:23077:6887 2:N:0:GAACCTAG+TCCGCATA  
AGGACGAAACCGTCGTTACTCTTCGAGTTGTGTAAGTTTCGTCCTAAAAAGGACTCGTCAGGTAGCCT  
ACTAGACTACGACTTACACGGTAGGTCGTGAACAAGCCCGGAGTACATCTCCTTTGGAAGTGGGAGAC  
+  
FFFFFFFFFFFFFFFFFFFFFFFF,FFFFFFFFFFFFFFFFFFFFFFFFFFFFFFFF:FFFFFFFFFFFFFFFF:FFF,FFFF  
FFFFFFFFFFFFFFFFFFFFFFFFFFFFFFFFFFFFFFFF:FFFF:FFFFFFFF:FFFFFFFF,FFFF:FFFFFFFF  
@A00155:342:HHGFNDSXY:1:1525:29839:13526 2:N:0:GAACCTAG+TCCGCATA  
ACATCTCCTTTGGAAGTGGGAGACCCCTCCGGTCTTGTCCAACCTCTGTTTCGGCAGAGGATACCGTG  
CTCCACAGCTGTAAGGCTGTGGGCCCGAGAGAAGTCGCTCTCTCGCCCTCCACATCCCTCTCGGCA  
+  
FFFFFFFFFFFFFFFFFFFFFFFFFFFFFFFFFFFFFFFFFFFFFFFFFFFFFFFFFFFFFFFFFFFFFFFF  
FFFFFFFFFFFFFFFFFFFFFFFF:FFFFFFFF:FFFFFFFFFFFFFFFFFFFFFFFFFFFFFFFF:FFFFFFFF  
@A00155:342:HHGFNDSXY:1:1525:24569:22185 2:N:0:GAACCTAG+TCCGCATA  
AAAAGGACTCGTCAGGTAGCCTACTAGACTACGACTTACACGGTAGGTCGTGAACAAGCCCGGAGTAC  
ATCTCCTTTGGAAGTGGGAGACCCCTCCGGTCTTGTCCAACCTCTGTTTCGGCAGAGGATACCGTGCT  
+  
FFFFFFFFFFFFFFFFFFFFFFFFFFFFFFFFFFFFFFFFFFFFFFFFFFFFFFFFFFFFFFFFFFFFFFFF  
FFFFFFFFFFFFFFFF:FFFFFFFF:FFFFFFFF:FFFFFFFFFFFFFFFFFFFFFFFFFFFFFFFF:F:FFFFFF  
@A00155:342:HHGFNDSXY:1:1525:24388:22279 2:N:0:GAACCTAG+TCCGCATA  
AAAAGGACTCGTCAGGTAGCCTACTAGACTACGACTTACACGGTAGGTCGTGAACAAGCCCGGAGTAC  
ATCTCCTTTGGAAGTGGGAGACCCCTCCGGTCTTGTCCAACCTCTGTTTCGGCAGAGGATACCGTGCT  
+  
FF::FFFFFFFFFFFFFFFFFFFFFFFFFFFFFFFFFFFFFFFFFFFFFFFFFFFFFFFFFFFFFFFF  
FFFFFFFFFFFFFFFFFFFFFFFFFFFFFFFFFFFFFFFF,FFFFFFFFFFFFFFFFFFFFFFFFFFFFFFFF  
@A00155:342:HHGFNDSXY:1:1526:26078:30499 2:N:0:GAACCTAG+TCCGCATA  
TTACACGGTAGGTCGTGAACAAGCCCGGAGTACATCTCCTTTGGAAGTGGGAGACCCCTCCGGTCTTG  
TCCAACCTCTGTTTCGGCAGAGGATACCGTGCTCCACAGCTGTAAGGCTGTGGGCCCGAGAGAAGTCG  
+  
FFFFFFFFFFF:F,FFFFFFFFFFFFFFFFFFFFFFFFFFFFFFFFFFFFFFFFFFFFFFFF:FFFFFFFFFFFFFFFF  
FFFFFFFFF:FFFFFFFFFFFFFFFFFFFFFFFFFFFFFFFFFFFFFFFFFFFFFFFFFFFFFFFFFFFFFFFF  
@A00155:342:HHGFNDSXY:1:1527:27760:5259 2:N:0:GAACCTAG+TCCGCATA  
GAGACCCCTCCGGTCTTGTCCAACCTCTGTTTCGGCAGAGGATACCGTGCTCCACAGCTGTAAGGCTG  
TGGGCCCGAGAGAAGTCGCTCTCTCTCGCCCTCCACATCCCTCTCGGCATTGAGATGAC  
+  
FFFFFFFFFFFFFFFF:FFFFFFFFFFFFFFFFFFFFFFFFFFFFFFFFFFFFFFFFFFFFFFFF:FF  
FFFFFFFFFFFFFFFF:FFFFFFFFFFFFFFFFFFFFFFFFFFFFFFFFFFFFFFFFFFFFFFFF

@A00155:342:HHGFNDSXY:1:1527:10881:15734 2:N:0:GAACCTAG+TCCGCATA  
GGACTCGTCAGGTAGCCTACTAGACTACGACTTACACGGTAGGTCGTGAACAAGCCCGGAGTACATCT  
CCTTTGGAAGTAGGAGACCCCTCCGGTCTTGTC AACCTCTGTTTCGGCAGAGGATACCGTGCTCCAC  
+  
FFFFFFFFFFFFFFFFFFFFFFFFFFFFFFFFFFFFFFFFFFFFFFFFFFFFFFFFFFFFFFFFFFFFFFFFFFFFF  
FFFFFFFFFFFFFFFFFFFFFFFFFFFFFFFFFFFFFFFFFFFFFFFFFFFFFFFFFFFFFFFFFFFFFFFFFFFFF  
@A00155:342:HHGFNDSXY:1:1527:3794:36652 2:N:0:GAACCTAG+TCCGCATA  
GACGAAACCGTCGTTACTCTTCGAGTTGTGTAAGTTTCGTCCTAAAAAGGACTCGTCAGGTAGCCTAC  
TAGACTACGACTTACACGGTAGGTCGTGAACAAGCCCGGAGTACATCTCCTTTGGAACCAGGAGACCC  
+  
FFFFFFFFFFFFFFFFFFFFFFFFFFFFFFFFFFFFFFFFFFFFFFFFFFFFFFFFFFFFFFFFFFFFFFFFFFFFF  
FFFFFFFFFFFFFFFFFFFFFFFFFFFFFFFFFFFFFFFFFFFFFFFFFFFFFFFFFFFFFFFFFFFFFFFFFFFFF  
@A00155:342:HHGFNDSXY:1:1527:3812:36714 2:N:0:GAACCTAG+TCCGCATA  
GACGAAACCGTCGTTACTCTTCGAGTTGTGTAAGTTTCGTCCTAAAAAGGACTCGTCAGGTAGCCTAC  
TAGACTACGACTTACACGGTAGGTCGTGAACAAGCCCGGAGTACATCTCCTTTGGAACCAGGAGACCC  
+  
FFFFFFFFFFF:FFFFFF:FF,FFFF,FFFF:FFF,FFFFFFFF,FFFFFFFFFFFFFFFFFFFF,FF,:FF  
F,FF:FFFFFFFFFFFFFFFFFFFFFFFFFFFFFFFFFFFFFFFFFFFFFFFFFFFFFFFFFFFFFFFFFFFFF  
@A00155:342:HHGFNDSXY:1:1527:3269:36746 2:N:0:GAACCTAG+TCCGCATA  
GACGAAACCGTCGTTACTCTTCGAGTTGTGTAAGTTTCGTCCTAAAAAGGACTCGTCAGGTAGCCTAC  
TAGACTACGACTTACACGGTAGGTCGTGAACAAGCCCGGAGTACATCTCCTTTGGAACCAGGAGACCC  
+  
FFFFFFFFFFFFFFFFFFFFFFFFFFFFFFFFFFFFFFFFFFFFFFFFFFFFFFFFFFFFFFFFFFFFFFFFFFFFF  
FFFFFFFFFFFFFFFFFFFFFFFFFFFFFFFFFFFFFFFFFFFFFFFFFFFFFFFFFFFFFFFFFFFFFFFFFFFFF  
@A00155:342:HHGFNDSXY:1:1528:3757:3302 2:N:0:GAACCTAG+TCCGCATA  
GACGAAACCGTCGTTACTCTTCGAGTTGTGTAAGTTTCGTCCTAAAAAGGACTCGTCAGGTAGCCTAC  
TAGACTACGACTTACACGGTAGGTCGTGAACAAGCCCGGAGTACATCTCCTTTGGAACCAGGAGACCC  
+  
FFFFFFF,FFFFFFFFFFF:F:FFFFFFFFFFFFFFFFFFFFFFFFFFFFFFFFFFFFFFFFFFFFFFFFFFFFF  
FF,FFFFFFFFFFFFFFFFFFFFFFFFFFFFFFFFFFFFFFFFFFFFFFFFFFFFFFFFFFFFFFFFFFFFFFFFFFFF  
@A00155:342:HHGFNDSXY:1:1528:5575:13557 2:N:0:GAACCTAG+TCCGCATA  
AAAAGGACTCGTCAGGTAGCCTACTAGACTACGACTTACACGGTAGGTCGTGAACAAGCCCGGAGTAC  
ATCTCCTTTGGAAGTAGGAGACCCCTCCGGTCTTGTC AACCTCTGTTTCGGCAGAGGATACCGTGCT  
+  
FF,F:FFFFFFFFFFFFFFFFFFFFFFFFFFFFFFFFFFFFFFFFFFFFFFFFFFFFFFFFFFFFFFFFFFFFF  
FFF:F,:FFFF:FFFFFFFFFFFFFFFF,FFFFFF:FFFFFFFFFFFFFFFF:FFF:,FFFF,FFFFFF::,FF  
@A00155:342:HHGFNDSXY:1:1529:8006:5995 2:N:0:GAACCTAG+TCCGCATA  
TCAGGTAGCCTACTAGACTACGACTTACACGGTAGGTCGTGAACAAGCCCGGAGTACATCTCCTTTGG  
AACTAGGAGACCCCTCCGGTCTTGTC AACCTCTGTTTCGGCAGAGGATACCGTGCTCCACAGCTG  
+  
FFFFFFFFFFFFFFFFFFFFFFFFFFFFFFFFFFFFFFFFFFFFFFFFFFFFFFFFFFFFFFFFFFFFFFFFFFFFF  
FFFFFFFFFFFFFFFFFFFFFFFFFFFFFFFFFFFFFFFFFFFFFFFFFFFFFFFFFFFFFFFFFFFFFFFFFFFFF  
@A00155:342:HHGFNDSXY:1:1529:29460:10895 2:N:0:GAACCTAG+TCCGCATA  
CAAGGACGAAACCGTCGTTACTCTTCGAGTTGTGTAAGTTTCGTCCTAAAAAGGACTCGTCAGGTAGC  
CTACTAGACTACGACTTACACGGTAGGTCGTGAACAAGCCCGGAGTACATCTCCTTTGGAAGTAGGAG  
+  
FFFFFFFFFFFFFFFFFFFFFFFFFFFFFFFFFFFFFFFFFFFFFFFFFFFFFFFFFFFFFFFFFFFFFFFFFFFFF  
FFFFFFFFFFFFFFFFFFFFFFFFFFFFFFFFFFFFFFFFFFFFFFFFFFFFFFFFFFFFFFFFFFFFFFFFFFFFF  
@A00155:342:HHGFNDSXY:1:1529:31665:15781 2:N:0:GAACCTAG+TCCGCATA  
GGTCGTGAACAAGCCCGGAGTACATCTCCTTTGGAAGTAGGAGACCCCTCCGGTCTTGTC AACCTCT  
GTTTCGGCAGAGGATACCGTGCTCCACAGCTGTAAGGCTGTGGGCCGAGAGAAGTCGCTCTCTCTCG  
+  
FFFFFFFFFFFFFFFFFFFFFFFFFFFFFFFFFFFFFFFFFFFFFFFFFFFFFFFFFFFFFFFFFFFFFFFFFFFFF  
FFFFFFFFFFFFFFFFFFFFFFFFFFFFFFFFFFFFFFFFFFFFFFFFFFFFFFFFFFFFFFFFFFFFFFFFFFFFF  
@A00155:342:HHGFNDSXY:1:1529:31665:15781 2:N:0:GAACCTAG+TCCGCATA  
GGTCGTGAACAAGCCCGGAGTACATCTCCTTTGGAAGTAGGAGACCCCTCCGGTCTTGTC AACCTCT  
GTTTCGGCAGAGGATACCGTGCTCCACAGCTGTAAGGCTGTGGGCCGAGAGAAGTCGCTCTCTCTCG

@A00155:342:HHGFNDSXY:1:1529:9227:35227 2:N:0:GAACCTAG+TCCGCATA  
TACGACTTACACGGTAGGTCGTGAACAAGCCCGGAGTACATCTCCTTTGGAAGTACAGAGACCCCTCCG  
GTCTTGTCCAACCTCTGTTTCGGCAGAGGATACCGTGCTCCACAGCTGTAAGGCTGTGGGCCCG  
+  
FFFFFFFFFFFFFFFFFFFFFFFFFFFFFFFFFFFFFFFFFFFFFFFFFFFFFFFFFFFFFFFFFFFFFFFF  
FFFFFFFFFFFFFFFFFFFFFFFFFFFFFFFFFFFFFFFFFFFFFFFFFFFFFFFFFFFFFFFFFFFFFFFF  
@A00155:342:HHGFNDSXY:1:1530:25464:2221 2:N:0:GAACCTAG+TCCGCATA  
ACCCCTCCGGTCTTGTCCAACCTCTGTTTCGGCAGAGGATACCGTGCTCCACAGCTGTAAGGCTGTGG  
GCCCCGAGAGAAGTCGCTCTCTCGCCCTCCACATCCCTCTCGGCATTGAGATGACCATAGGCCAG  
+  
,FFFFFFFFFFFFFFFFFFFFFFFFFFFFFFFFFFFFFFFFFFFFFFFFFFFFFFFFFFFFFFFFFFFFFFFF  
FFFFFFFFFFFFFFFFFFFFFFFFFFFFFFFFFFFFFFFFFFFFFFFFFFFFFFFFFFFFFFFFFFFFFFFF  
@A00155:342:HHGFNDSXY:1:1530:1841:22811 2:N:0:GAACCTAG+TCCGCATA  
ACGACTTACACGGTAGGTCGTGAACAAGCCCGGAGTACATCTCCTTTGGAAGTACAGAGACCCCTCCG  
TCTTGTCCAACCTCTGTTTCGGCAGAGGATACCGTGCTCCACAGCTGTAAGGCTGTGGGCCCGAGAGA  
+  
FFFFFFFFF:FFFF:FF:FFFFFFFFF::FFFFFFFFFFFFFFFFFFFFFFFFFFFFFFFFFFFFFFFFF:FFFFF,FF  
FFFFFFFFFFFFFFFFFFFFFFFFFFFFFFFFFFFFFFFFFFFFFFFFFFFFFFFFFFFFFFFFFFFFFFFFF:  
@A00155:342:HHGFNDSXY:1:1530:11559:26960 2:N:0:GAACCTAG+TCCGCATA  
GAAACCGTCGTTACTCTTCGAGTTGTGTAAGTTTCGTCCTAAAAAGGACTCGTCAGGTAGCCTACTAG  
ACTACGACTTACACGGTAGGTCGTGAACAAGCCCGGAGTACATCTCCATTGGAAGTACAGAGACCCCTC  
+  
FFFFFFFFFFFFFFFFFFFFFFFFFFFFFFFFFFFFFFFFF,FF:F:FFFFFFFFFFFFFFFFFFFFFFFFF  
FFFFF:FFFFFFFFFFFF:FFFFFFFFF,F,FFFFFFFFFFFFFFFFF:FFFFFFFFFFFFFFFFFFFF  
@A00155:342:HHGFNDSXY:1:1530:10673:27117 2:N:0:GAACCTAG+TCCGCATA  
GCCTACTAGACTACGACTTACACGGTAGGTCGTGAACAAGCCCGGAGTACATCTCCTTTGGAACCAGG  
AGACCCCTCCGGTCTTGTCCAACCTCTGTTTCGGCAGAGGATACCGTGCTCCACAGCTGTAAGGCTGT  
+  
FFFFFFF,FFFFFFFFFFFFFFFFFFFFFFFFF,FFFFFFFFFFFFFFFFF:FFFFFFFFFFFFFFFFF:FFFFF  
FFFFFFFFFFFFFFFFFFFF:FFFFFFFFFFFFFFFFFFFFFFFFFFFFFFFFF:FFFFFFFFFFFFFFFFF:FFFFF  
@A00155:342:HHGFNDSXY:1:1531:27127:21605 2:N:0:GAACCTAG+TCCGCATA  
AAGCCCGGAGTACATCTCCTTTGGAAGTACAGAGACCCCTCCGGTCTTGTCCAACCTCTGTTTCGGCAG  
AGGATACCGTGCTCCACAGCTGAAAGGCTGTGGGCCCGAGAGAAGTCGCTCTCTCTCGCCCTCCACAT  
+  
FF,:FF,FFFFFFFFFFFFFFFFFFFFFFFFFFFFFFFFFFFFFFFFFFFFFFFFFFFFFFFFFFFFFFFFF:F  
FFFFFFFFFFFFFFFFFFFFFFFFFFFFFFFFFFFFFFFFF:FFFFFFFFFFFFFFFFF,FFFFFFFFFFFF:FFFFFFFFF:F  
@A00155:342:HHGFNDSXY:1:1531:29749:34788 2:N:0:GAACCTAG+TCCGCATA  
GGACTCGTCAGGTAGCCTACTAGACTACGACTTACACGGTAGGTCGTGAACAAGCCCGGAGTACATCT  
CCTTTGGAAGTACAGAGACCCCTCCGGTCTTGTCCAACCTCTGTTTCGGCAGAGGATACCGTGCTCCAC  
+  
FFFFFFF,FFFFFFFFFFFFFFFFF:FFFFFFFFFFFFFFFFFFFFFFFFFFFFFFFFFFFFFFFFFFFFF  
FFFFFFFFFFFFFFFFFFFFFFFFFFFFFFFFF,F:FFFFF:FFFFFFFFFFFFFFFFFFFFFFFFFFFFF  
@A00155:342:HHGFNDSXY:1:1532:31186:11318 2:N:0:GAACCTAG+TCCGCATA  
ACCTCTGTTTCGGCAGAGGATACCGTGCTCCACAGCTGTAAGGCTGTGGGCCCGAGAGAAGTCGCTCT  
CTCTCGCCCTTACATCCCTCTCGGCATTGAGATGACCATAGGCCAGAGGTGAGTCCTTAAGTGAC  
+  
FFFFFFFFFFFFFFFFFFFFFFFFFFFFFFFFFFFFFFFFFFFFFFFFFFFFFFFFFFFFFFFFFFFFFFFF  
FFFFFFFFFFFF:FFFFFFFFFFFFFFFFFFFFFFFFF:FFFFF,FFFF,FFFFFFFFFFFFFFFFF:FFFF  
@A00155:342:HHGFNDSXY:1:1532:31774:25614 2:N:0:GAACCTAG+TCCGCATA  
ACATCTCCTTTGGAAGTACAGAGACCCCTCCGGTCTTGTCCAACCTCTGTTTCGGCAGAGGATACCGTG  
CTCCACAGCTGTAAGGCTGTGGGCCCGAGAGAAGTCGCTCTCTCTCGCCCTCCACATCCCTCTCGGC  
+  
FFFFFFFFFFFFFFFFF:FFFFFFFFFFFFFFFFFFFFFFFFF:FFFFFFFFFFFFFFFFFFFFFFFFFFFFF  
FFFFFFF:FFFFF,FFFFF:FFFFFFFFFFFFFFFFF:FFFFF:FFFFFFFFFFFFFFFFFFFFFFFFFFFFF

@A00155:342:HHGFNDSXY:1:1532:26449:30608 2:N:0:GAACCTAG+TCCGCATA  
TTACTCTTCGAGTTGTGTAAGTTTCGTCCTAAAAAGGACTCGTCAGGTAGCCTACTAGACTACGACTT  
ACACGGTAGGTCGTGAACAAGCCCGGAGTACATCTCCTTTGGAAGTACGAGACCCTCCGGTCTTGTC  
+  
FFFFFFFFFFFFFFFFFFFFFFFFFFFF,FFFFFFFFFFFFFF,FFFFFFFFFFFFFFFFFFFFFFFFFFFFFFFFFFFFF  
FFFFFFFFFFFFFFFF:F:FFFFFFFFFFFFFFFFFFFFFFFFFFFFFFFFFFFFFFFFFFFFFFFFFFFFF  
@A00155:342:HHGFNDSXY:1:1532:8712:33113 2:N:0:GAACCTAG+TCCGCATA  
GAAACCGTCGTTACTCTTTGAGTTGTGTAAGTTTCGTCCTAAAAAGGACTCGTCAGGTAGCCTACTAG  
ACTACGACTTACACGGTAGGTCGTGAACAAGCCCGGAGTACATCTCCTTTGGAAGTACGAGACCCTC  
+  
FFFFFFFFFFFFFFFFF:,FF:FFFFFFFF:FFF:FFF:,FFFFFFFFFFFFFFFFFFFFFFFFFFFFF  
FFFFFFFFFFFFFFFF:FFFFFFFFFFFFFFFFFFFFFFFFFFFFFFFFFFFFFFFFFFFFFFFFFFFFF  
@A00155:342:HHGFNDSXY:1:1534:13810:18584 2:N:0:GAACCTAG+TCCGCATA  
GTTGTGTAAGTTTCGTCCTAAAAAGGACTCGTCAGGTAGCCTACTAGACTACGACTTACACGGTAGGT  
CGTGAACAAGCCCGGAGTACATCTCCTTTGGAACAGGAGACCCTCCGGTCTTGTCACACCTCTGTT  
+  
FFFFFFFFFFFFFFFFFFFFFFFFFFFFFFFFFFFFFFFFFFFFFFFFFFFFFFFFFFFFFFFFFFFFF  
FFFFFFFFF:FFFFFFFFFFFFFFFFFFFFFFFFFFFF:FFF:FFFFFFFFFFFFFFFFFFFFFFFFFFFFF  
@A00155:342:HHGFNDSXY:1:1535:8079:9251 2:N:0:GAACCTAG+TCCGCATA  
ACATCTCCTTTGGAAGTACGAGACCCTCCGGTCTTGTCACACCTCTGTTTCGGCAGAGGATACCGTG  
CTCCACAGCTGTAAGGCTGTGGGCCCGAGAGAAGTCGCTCTCTCGCCCTCCACATCCCTCTCGCA  
+  
FFFFFFFF:FFFFFF,FFFFFFFFFFFFFFFF:F:FF:,FFFFFF,FFFFFFFF:F:FFFFFFFFF  
FF:FFF:F:,FFFFFFFFFFFFFFFF:FFF:FFFFFFFF:FFFFF:F:,FFFFFF,FFFFFF  
@A00155:342:HHGFNDSXY:1:1535:25382:16485 2:N:0:GAACCTAG+TCCGCATA  
CGTCAGGTAGCCTACTAGACTACGACTTACACGGTAGGTCGTGAACAAGCCCGGAGTACATCTCCTTT  
GGAAGTACGAGACCCTCCGGTCTTGTCACACCTCTGTTTCGGCAGAGGATACCGTGCTCCACAGCTG  
+  
FFFFFFFF:FFFFFFFFFFFFFFFFFFFFFFFFFFFFFFFFFFFFFFFFFFFFFFFFFFFFFFFFFFFFF  
FFFFFFFFFFFFFFFF:FFFFFFFFFFFFFFFF:FFFFFFFFFFFFFFFFFFFFFFFFFFFFFFFFFFFFF  
@A00155:342:HHGFNDSXY:1:1535:15727:24314 2:N:0:GAACCTAG+TCCGCATA  
CGTGAACAAGCCCGGAGTACATCTCCTTTGGAAGTACGAGACCCTCCGGTCTTGTCACACCTCTGTT  
TCGGCAGAGGATACCGTGCTCCACAGCTGTAAGGCTGTGGGCCCGAGAGAAGTCGCTCTCTCGCCC  
+  
FFFFFFFFFFFFFFFFFFFFFFFFFFFFFFFFFFFFFFFFFFFFFFFFFFFFFFFFFFFFFFFFFFFFF  
FFFFFFFFFFFFFFFF:FFFFFFFFFFFFFFFFFFFFFFFFFFFFFFFFFFFFFFFFFFFFFFFFFFFFF  
@A00155:342:HHGFNDSXY:1:1535:6099:27993 2:N:0:GAACCTAG+TCCGCATA  
AGTACATCTCCTTTGGAAGTACGAGACCCTCCGGTCTTGTCACACCTCTGTTTCGGCAGAGGATACC  
GTGCTCCACAGCTGTAAGGCTGTGGGCCCGAGAGAAGTCGCTCTCTCGCCCTCCACATCCCTCTCG  
+  
FFFFFFFFFFFFFFFFFFFFFFFFFFFFFFFFFFFFFFFFFFFFFFFFFFFFFFFFFFFFFFFFFFFFF:FFF  
FFFFFFFFFFFFFFFFFFFFFFFFFFFFFFFFFFFFFFFF: :FFFF:FFFFFFFFFFFFFFFFFFFFFFFFF  
@A00155:342:HHGFNDSXY:1:1535:23213:28917 2:N:0:GAACCTAG+TCCGCATA  
AGTACATCTCCTTTGGAAGTACGAGACCCTCCGGTCTTGTCACACCTCTGTTTCGGCAGAGGATACC  
GTGCTCCACAGCTGTAAGGCTGTGGGCCCGAGAGAAGTCGCTCTCTCGCCCTCTACATCCCTCTCG  
+  
FFFFFFFFFFFF:FFFFFFFFFFFFFFFFFFFFFFFFFFFF:FFFFFFFFFFFFFFFFFFFFFFFFFFFFF  
FF:FFFFFFFFFFFFFFFFFFFFFFFF:FFFFFFFFFFFFFFFFFFFFFFFFFFFFFFFF:FFFFFFFFF  
@A00155:342:HHGFNDSXY:1:1535:6632:29700 2:N:0:GAACCTAG+TCCGCATA  
AGTACATCTCCTTTGGAAGTACGAGACCCTCCGGTCTTGTCACACCTCTGTTTCGGCAGAGGATACC  
GTGCTCCACAGCTGTAAGGCTGTGGGCCCGAGAGAAGTCGCTCTCTCGCCCTCCACATCCCTCTCG  
+

@A00155:342:HHGFNDSXY:1:1535:17083:33552 2:N:0:GAACCTAG+TCCGCATA  
AGTACATCTCCTTTGGAAGTACGAGACCCCTCCGGTCTTGTCCAACCTCTGTTTCGGCAGAGGATACC  
GTGCTCCACAGCTGTAAGGCTGTGGGCCCGAGAGAAGTCGCTCTCTCGCCCTCCACATCCCTCTCG  
+  
FFFFFFFFFFFF:FFFFFFFFFFFFFFFFFFFFFFFFFFFFFFFFFFFFFFFFFFFFFFFFFFFFFFFFFFFF  
FFFFFFFFFFFFFFFFFFFFFFFFFFFFFFFFFFFFFFFFFFFFFFFFFFFFFFFFFFFFFFFFFFFFFFFFFFFF  
@A00155:342:HHGFNDSXY:1:1536:20564:9392 2:N:0:GAACCTAG+TCCGCATA  
TACGACTTACACGGTAGGTCGTGAACAAGCCCGGAGTACATCTCCTTTGGAAGTACGAGACCCCTCCG  
GTCTTGTCCAACCTCTGTTTCGGCAGAGGATACCGTGCTCCACAGCTGTAAGGCTGTGGGCCCG  
+  
FFFFFFFFFFFFFFFFFFFFFFFFFFFFFFFFFFFFFFFFFFFFFFFFFFFFFFFFFFFFFFFFFFFFFFFFFFFF  
FFF,:F:FFFFFFFFFFFF:FFFFFFFFFFFF,FFFFFFFFFFFFFFFFFFFF:FFF:FFFF:FFFFFFFF  
@A00155:342:HHGFNDSXY:1:1536:14841:29700 2:N:0:GAACCTAG+TCCGCATA  
TTTCGTCCTAAAAAGGACTCGTCAGGTAGCCTACTAGACTACGACTTACACGGTAGGTCGTGAACAAG  
CCCGGAGTACATCTCCTTTGGAACCAGGAGACCCCTCCGGTCTTGTCCAACCTCTGTTTCGGCAGAGG  
+  
FFFFFFFFFFFF:FFFFFFFFFFFFFFFFFFFFFFFFFFFFFFFFFFFFFFFFFFFFFFFFFFFFFFFFFFFFFFFF  
FFFFFFFFFFFF:FFFFFFF:FFFFFFFFFFFFFFFFFFFFFFFFFFFFFFFFFFFFFFFFFFFFFFFFFFFFFFFF  
@A00155:342:HHGFNDSXY:1:1537:6099:3787 2:N:0:GAACCTAG+TCCGCATA  
GAAACCGTCGTTACTCTTTGAGTTGTGTAAGTTTCGTCCTAAAAAGGACTCGTCAGGTAGCCTACTAG  
ACTACGACTTACACGGTAGGTCGTGAACAAGCCCGGAGTACATCTCCTTTGGAAGTACGAGACCCCTC  
+  
FFFFF:FFFFFFFFF:,FFFFFFFFFFFFFFFFFFFFFFFFFFFFFFFFFFFFF,:FFFFFFFFFFFFFFFFFFFF  
FFFF,FFFFFFFFFFFFFFFFFFFFFFFFFFFFFFFFFFFF:FFFFFFFFFFFFFFFFFFFFFFFFFFFFFFFFFFFF  
@A00155:342:HHGFNDSXY:1:1537:15194:5008 2:N:0:GAACCTAG+TCCGCATA  
ACTACGACTTACACGGTAGGTCGTGAACAAGCCCGGAGTACATCTCCTTTGGAACCAGGAGACCCCTC  
CGGTCTTGTCCAACCTCTGTTTCGGCAGAGGATACCGTGCTCCACAGCTGTAAGGCTGTGGGCCCGAG  
+  
FFFFFFFFFFFF:FFFFFFFFFFFF,FFFFFFFFFFFFFFFFFFFFFFFFFFFF:FFFFFFFFFFFFFFFFFFFF,FF,FFFF:FFFF  
FFFFFFFFFFFF:F:FFFFFFF:FFFFFFFFFFFF:FF:FFF:F:FFFFFFFFFFFF:FFFFFFFFFFFFFFFFFFFF  
@A00155:342:HHGFNDSXY:1:1537:7075:7294 2:N:0:GAACCTAG+TCCGCATA  
TCTCCTTTGGAAGTACGAGACCCCTCCGGTCTTGTCCAACCTCTGTTTCGGCAGAGGATACCGTGCTC  
CACAGCTGTAAGGCTGTGGGCCCGAGAGAAGTCGCTCTCTCTCGCCCTCCACATCCCTCTCGGCATTG  
+  
FFFFFFFFFFFFFFFFFFFFFFFFFFFF:FFFFFFFFFFFF:FFFFFFFFFFFFFFFFFFFFFFFFFFFF:FFFFFFFFFFFFFFFFFFFF  
FFFFFFFFFFFFFFFFFFFFFFFFFFFFFFFFFFFFFFFFFFFFFFFFFFFFFFFFFFFFFFFFFFFF:FFFFFFFFFFFFFFFFFFFF  
@A00155:342:HHGFNDSXY:1:1537:7527:13338 2:N:0:GAACCTAG+TCCGCATA  
GGTCGTGAACAAGCCCGGAGTACATCTCCTTTGGAAGTACGAGACCCCTCCGGTCTTGTCCAACCTCT  
GTTTCGGCAGAGGATACCGTGCTCCACAGCTGTAAGGCTGTGGGCCCGAGAGAAGTCGCTCTCTCTCG  
+  
FFFFFFFFFFFFFFFFFFFFFFFFFFFF:FFFFFFFFFFFF:FFFFFFFFFFFFFFFFFFFFFFFFFFFF:FFFFFFFFFFFFFFFFFFFF  
FFFFFFF:FFFFFFFFFFFFFFFFFFFFFFFFFFFFFFFFFFFF:FFFFFFFFFFFFFFFFFFFF:FFFFFFFFFFFFFFFFFFFF  
@A00155:342:HHGFNDSXY:1:1538:22426:3724 2:N:0:GAACCTAG+TCCGCATA  
CTGGCCTATGGTCATCTCAATGCCGAGAGGGATGTGGAGGGCGAGAGAGAGCGACTTCTCTCGGGCCC  
ACAGCCTTACAGCTGTGGAGCACGGTATCCTCTGCCGAAACAGAGGTTGGACAAGACCGGAGGGGTCT  
+  
FFFFFFFFFFFFFFFFFFFFFFFFFFFFFFFFFFFF:FFFF:FFFFFFFFFFFFFFFFFFFFFFFFFFFF:FFFFF  
FFFFFFF,FFFFFFF:FFFFFFFFFFFF:FFF:FFFFFFFFFFFFFFFFFFFFFFFFFFFFFFFFFFFF,FFFFF  
@A00155:342:HHGFNDSXY:1:1538:1570:7404 2:N:0:GAACCTAG+TCCGCATA  
AAAAGGACTCGTCAGGTAGCCTACTAGACTACGACTTACACGGTAGGTCGTGAACAAGCCCGGAGTAC  
ATCTCCTTTGGAACCAGGAGACCCCTCCGGTCTTGTCCAACCTCTGTTTCGGCAGAGGATACCGTGCT  
+  
FFF,FFFFFFFFFFFFFFFFFFFFFFFFFFFFFFFFFFFF:FFFFFFFFFFFFFFFFFFFF  
FFFFFFFFFFFFFFFFFFFFFFFFFFFFFFFFFFFF:FFFFFFFFFFFF,FFFFFFFFFFFFF:FF:FFFFFFFFFFFF

$+$ 

+

+

+

+

+

+

 $+$  $\pm$ 

.....

@A00155:342:HHGFNDSXY:1:1540:16685:12790 2:N:0:GAACCTAG+TCCGCATA  
ACTCTTCGAGTTGTGTAAGTTTTCGTCCTAAAAAGGACTCGTCAGGTAGCCTACTAGACTACGACTTAC  
ACGGTAGGTCGTGAACAAGCCCCGGAGTACATCTCCTTTGAACTAGGAGACCCCTCCGGTCTTGCCA  
+  
FFFFFFFFFFFFFFFFFFFFFFFFFFFFFFFFFFFFFFFFFFFFFFFFFFFFFFFFFFFFFFFFFFFFF:  
FFFFFFFFFFFFFFFFFFFFFFFFFFFFFFFFFFFFFFFFFFFFFFFFFFFFFFFFFFFFFFFFFFFFFFF  
@A00155:342:HHGFNDSXY:1:1540:5963:30201 2:N:0:GAACCTAG+TCCGCATA  
CTACGACTTACACGGTAGGTCGTGAACAAGCCCCGGAGTACATCTCCTTTGAAACCAGGAGACCCCTCC  
GGTCTTGCCAACCTCTGTTTCGGCAGAGGATACCGTGCTCCACAGCTGTAAGGCTGTGGGCCCGAGA  
+  
FFFFFFFFFFFFFFFFFFFFFFFFFFFFFFFFFFFFFFFFFFFFFFFFFFFFFFFFFFFFFFFFFFFFFFF:  
FFFFFFFFFFFFFFFFFFFFFFFFFFFFFFFFFFFFFFFFFFFFFFFFFFFFFFFFFFFFFFFFFFFFFFF  
@A00155:342:HHGFNDSXY:1:1540:6596:33082 2:N:0:GAACCTAG+TCCGCATA  
TAGGTCGTGAACAAGCCCCGGAGTACATCTCCTTTGAACTAGGAGACCCCTCCGGTCTTGCCAACCT  
CTGTTTCGGCAGAGGATACCGTGCTCCACAGCTGTAAGGCTGTGGGCCCGAGAGAAGTCGCTCTCTCT  
+  
FFFFFFFFFFFFFFFFFFFFFFFFFFFFFFFFFFFFFFFFFFFFFFFFFFFFFFFFFFFFFFFFFFFFFFF:  
FFFFFFFFFFFFFFFFFFFFFFFFFFFFFFFFFFFFFFFFFFFFFFFFFFFFFFFFFFFFFFFFFFFFFFF  
@A00155:342:HHGFNDSXY:1:1541:12355:22013 2:N:0:GAACCTAG+TCCGCATA  
AGAGAGAGCGACTTCTCTCGGGCCCACAGCCTTACAGCTGTGGAGCACGGTATCCTCTGCCGAAACAG  
AGGTTGGACAAGACCGGAGGGGTCTCCTAGTTCAAAGGAGATGTACTCCGGGCTTGTTACGACCTA  
+  
FFFFFFFFFFFFFFFFFFFFFFFFFFFFFFFFFFFFFFFFFFFFFFFFFFFFFFFFFFFFFFFFFFFFFFF:F:FFFFF  
FFFFFFFFFFFFFFFFFFFFFFFFFFFFFFFFFFFFFFFFFFFFFFFFFFFFFFFFFFFFFFFFFFFFFFF:FFF:FFFFF  
@A00155:342:HHGFNDSXY:1:1541:27172:28541 2:N:0:GAACCTAG+TCCGCATA  
CAGGGAGCCTACTAGACTCCGACCGTCATGGGGGTTTAAACCATGCCCGCCACACCGCCTTAGATC  
AGCTGTGTCCACTTAAGGACTCACCTCTGGCCTATGGTCATCTCAATGCCGAGAGGGATGTGGAGGGC  
+  
FFFFFFFFFFFFFFFFFFFFFFFFFFFFFFFFFFFFFFFFFFFFFFFFFFFFFFFFFFFFFFFFFFFFFFF:FFF:FFFFF  
@A00155:342:HHGFNDSXY:1:1541:19569:30686 2:N:0:GAACCTAG+TCCGCATA  
GCCTACTAGACTCCGACCGTCATGGGGGTTC AAACCCATGCCCGCCACACCGCCTTAGATCAGCTGT  
GTCCACTTAAGGACTCACCTCTGGCCTATGGTCATCTCAATGCCGAGAGGGATGTGGAGGGCGAGAGA  
+  
FFFFFFFFF,FFFFFFFFFFFFFFFFFFFFFFFFFFFFFFFFFFFFFFFFFFFFFFFFFFFFFFFFFFFFFFF  
FFFFFFF:FF:FFFFFFFFFFFFFFFFFFFFFFFFFFFFFFFFFFFFFFFFFFFFFFFFFFFFFFFFFFFFF:F:FFFFF  
@A00155:342:HHGFNDSXY:1:1542:15121:14184 2:N:0:GAACCTAG+TCCGCATA  
CACGGTAGGTCGTGAACAAGCCCCGGAGTACATCTCCTTTGAAACCAGGAGACCCCTCCGGTCTTGTC  
AACCTCTGTTTCGGCAGAGGATACCGTGCTCCACAGCTGTAAGGCTGTGGGCCCGAGAGAAGTCGCTC  
+  
FFFFFFFFFFFFFFFFFFFFFFFFFFFFFFFFFFFFFFFFFFFFFFFFFFFFFFFFFFFFFFFFFFFFFFF,FF:FF  
FFFFFFFFFFFFFFFFFFFFFFFFFFFFFFFFFFFFFFFFFFFFFFFFFFFFFFFFFFFFFFFFFFFFFFF:F:FFFFFFF  
@A00155:342:HHGFNDSXY:1:1542:12472:24878 2:N:0:GAACCTAG+TCCGCATA  
CAGGTAGCCTACTAGACTACGACTTACACGGTAGGTCGTGAACAAGCCCCGGAGTACATCTCCTTTGGA  
ACTAGGAGACCCCTCCGGTCTTGTTCCAACCTCTGTTTCGGCAGAGGATACCGTGCTCCACAGCTGTAA  
+  
FFFFF:FFFFFFFFFFFFFFFFFFFFFFFFFFFFFFFFFFFFFFFFFFFFFFFFFFFFFFFFFFFFFFFFFFFFF  
FFFFFFFFFFFFFFFFFFFFFFFFFFFFFFFFFFFFFFFFFFFFFFFFFFFFFFFFFFFFFFFFFFFFFFF,F  
@A00155:342:HHGFNDSXY:1:1542:26069:24972 2:N:0:GAACCTAG+TCCGCATA  
GGAGTACATCTCCTTTGAACTAGGAGACCCCTCCGGTCTTGTTCCAACCTCTGTTTCGGCAGAGGATA  
CCGTGCTCCACAGCTGTAAGGCTGTGGGCCCGAGAGAAGTCGCTCTCTCTCGCCCTCCACATCCCTCT

[illegible]



@A00155:342:HHGFNDSXY:1:1545:29496:8891 2:N:0:GAACCTAG+TCCGCATA  
AAAAAGGACTCGTCAGGTAGCCTACTAGACTACGACTTACACGGTAGGTCGTGAACAAGCCCGGAGTA  
CATCTCCTTTGGAAGTACGAGACCCCTCCGGTCTTGCCAACCTCTGTTTCGGCAGAGGATACCGTGC  
+  
FFFFFFFFFFFFFFFFFFFFFFFFFFFFFFFFFFFFFFFFFFFFFFFFFFFFFFFFFFFFFFFFFFFFFFFFFFFFF  
FFFFFFFFFFFFFFFFFFFFFFFFFFFFFFFFFFFFFFFFFFFFFFFFFFFFFFFFFFFFFFFFFFFFFFFFFFFF:  
@A00155:342:HHGFNDSXY:1:1545:5520:10645 2:N:0:GAACCTAG+TCCGCATA  
TACGACTTACACGGTAGGTCGTGAACAAGCCCGGAGTACATCTCCTTTGGAAGTACGAGACCCCTCCG  
GTCTTGCCAACCTCTGTTTCGGCAGAGGATACCGTGCTCCACAGCTGTAAGGCTGTGGGCCCG  
+  
FFFFFFFFFFFFFFFFFFFFFFFFFFFFFFFFFFFFFFFFFFFFFFFFFFFFFFFFFFFFFFFFFFFFFFFFFFFF:  
FFFFFFFFFFFFFFFFFFFFFFFFFFFFFFFFFFFFFFFFFFFFFFFFFFFFFFFFFFFFFFFFFFFFFFFFFFFF:  
@A00155:342:HHGFNDSXY:1:1545:17852:14904 2:N:0:GAACCTAG+TCCGCATA  
ACTAGGAGACCCCTCCGGTCTTGCCAACCTCTGTTTCGGCAGAGGATACCGTGCTCCACAGCTGTAA  
GGCTGTGGGCCCGAGAGAAGTCGCTCTCTCGCCCCACCACATCCCTCTCGGCATTGAGAT  
+  
FFFFFFFFFFF::FFFFFFFF,FFFF:FFF,FF:,F,FFFFFFFFFFFFFFFFFFFFFF:F:F::F:FFFFF:  
:FFF:,FFFFFFFFFFFFFFFFFFF:FFF:FFFFFFFFF,FFFFFFFFFFFFFFFFFFFF:,,:FFFF:  
@A00155:342:HHGFNDSXY:1:1546:32696:10207 2:N:0:GAACCTAG+TCCGCATA  
CAGGTAGCCTACTAGACTACGACTTACACGGTAGGTCGTGAACAAGTCCGGAGTACATCTCCTTTGGA  
ACTAGGAGACCCCTCCGGTCTTGCCAACCTCTGTTTCGGCAGAGGATACCGTGCTCCACAGCTGTAA  
+  
FFFFFFFFFFFFFFFFFFFFFFFFFFFFFFFFFFFFFFFFFFFFFFFFFFFFFFFFFFFFFFFFFFFFFFFFFFFF:  
FFF:FFFFFFFFFFFFFFFFFFFFFFFFFFFFFFFFFFFFFFFFFFFFFFFFFFFFFFFFFFFFFFFFFFFFFFFF:  
@A00155:342:HHGFNDSXY:1:1546:25681:21512 2:N:0:GAACCTAG+TCCGCATA  
AGGACTCGTCAGGTAGCCTACTAGACTACGACTTACACGGTAGGTCGTGAACAAGCCCGGAGTACATC  
TCCTTTGGAACCAGGAGACCCCTCCGGTCTTGCCAACCTCTGTTTCGGCAGAGGATACCGTGCTCCA  
+  
FFFFFFFFFFFF:FFFFFFFFFFFFFFFFFFFFFFFFFFFFFFFFFFFFFFFFFFFFFFFFFFFFFFFFFFFFFFF:  
FFFFFFFFFFFFFFFFFFFFFFFFFFFFFFFFFFFFFFFFFFFFFFFFFFFFFFFFFFFFFFFFFFFFFFFFFFFF:  
@A00155:342:HHGFNDSXY:1:1546:9652:34648 2:N:0:GAACCTAG+TCCGCATA  
CCTACTAGACTACGACTTACACGGTAGGTCGTGAACAAGCCCGGAGTACATCTCCTTTGGAAGTACGAG  
GACCCCTCCGGTCTTGCCAACCTCTGTTTCGGCAGAGGATACCGTGCTCCACAGCTGTAAGGCTGTG  
+  
FFFFFFFFFFFFFFFFFFFFFFFFFFFFFFFFFFFFFFFFFFFFFFFFFFFFFFFFFFFFFFFFFFFFFFFFFFFF:  
FFFFFFFFFFFFFFFFFFFFFFFFFFFFFFFFFFFFFFFFFFFFFFFFFFFFFFFFFFFFFFFFFFFFFFFFFFFF:  
@A00155:342:HHGFNDSXY:1:1547:12789:14935 2:N:0:GAACCTAG+TCCGCATA  
ACTTACACGGTAGGTCGTGAACAAGCCCGGAGTACATCTCCTTTGGAAGTACGAGACCCCTCCGGTCT  
TGCCAACCTCTGTTTCGGCAGAGGATACCGTGCTCCACAGCTGTAAGGCTGTGGGCCCGAGAGAAGT  
+  
FFFFFFFFFFFFFFFFFFFFFFFFFFFFFFFFFFFFFFFFFFFFFFFFFFFFFFFFFFFFFFFFFFFFFFFFFFFF:  
FFFFFFFFFFFFFFFFFFFFFFFFFFFFFFFFFFFFFFFFFFFFFFFFFFFFFFFFFFFFFFFFFFFFFFFFFFFF:  
@A00155:342:HHGFNDSXY:1:1548:20980:30060 2:N:0:GAACCTAG+TCCGCATA  
GGACTCGTCAGGTAGCCTACTAGACTACGACTTACACGGTAGGTCGTGAACAAGCCCGGAGTACATCT  
CCTTTGGAAGTACGAGACCCCTCCGGTCTTGCCAACCTCTGTTTCGGCAGTGGATACCGTGCTCCAC  
+  
FFFFFFFFFFFFFFFFFFFFFFFFFFFFFFFFFFFFFFFFFFFFFFFFFFFFFFFFFFFFFFFFFFFFFFFFFFFF:  
FFFFFFFFFFFFFFFFFFFFFFFFFFFFFFFFFFFFFFFFFFFFFFFFFFFFFFFFFFFFFFFFFFFFFFFFFFFF:  
@A00155:342:HHGFNDSXY:1:1549:25482:8766 2:N:0:GAACCTAG+TCCGCATA  
GGAGTACATCTCCTTTGGAACCAGGAGACCCCTCCGGTCTTGCCAACCTCTGTTTCGGCAGAGGATA  
CCGTGCTCCACAGCTGTAAGGCTGTGGGCCCGAGAGAAGTCGCTCTCTCGCCCTCCAC  
+  
FFFFFFFFFFFFF:FFFFFFFFFFFFFFFFFFFFFFFFFFFFFFFFFFFFFFFFFFFFFFFFFFFFFFFFFFFFFFF:  
FFFFFFFFFFFFFFFFFFFFFFFFFFFFFFFFFFFFFFFFFFFFFFFFFFFFFFFFFFFFFFFFFFFFFFFFFFFF:  
@A00155:342:HHGFNDSXY:1:1549:25482:8766 2:N:0:GAACCTAG+TCCGCATA  
GGAGTACATCTCCTTTGGAACCAGGAGACCCCTCCGGTCTTGCCAACCTCTGTTTCGGCAGAGGATA  
CCGTGCTCCACAGCTGTAAGGCTGTGGGCCCGAGAGAAGTCGCTCTCTCGCCCTCCAC

@A00155:342:HHGFNDSXY:1:1550:13476:12680 2:N:0:GAACCTAG+TCCGCATA  
AACTAGGAGACCCCTCCGGTCTTGTCCAACCTCTGTTTCGGCAGAGGATACCGTGCTCCACAGCTGTA  
AGGCTGTGGGCCCCGAGAGAAGTCGCTCTCTCTCGCCCTCCACATCCCTCTCGGCATTGAGATGAC

[illegible]

@A00155:342:HHGFNDSXY:1:1550:25337:17221 2:N:0:GAACCTAG+TCCGCATA  
GTTTCGTCTAAAAAGGACTCGTCAGGTAGCCTACTAGACTACGACTTACACGGTAGGTCGTGAACAA  
GCCCCGGAGTACATCTCCTTTGGAAGTAGGAGACCCCTCCGGTCTTGTCACCTCTGTTTCGGCAGAG

[illegible]

@A00155:342:HHGFNDSXY:1:1550:11903:25300 2:N:0:GAACCTAG+TCCGCATA  
TACTCTTCGAGTTGTGTAAGTTTCGTCCTAAAAGGACTCGTCAGGTAGCCTACTAGACTACGACTTA  
CACGGTAGGTCGTGAACAAGCCCGGAGTACATCTCCTTTGGAAGTGGAGACCCCTCCGGTCTTGTGTC

[illegible]

@A00155:342:HHGFNDSXY:1:1550:11767:26318 2:N:0:GAACCTAG+TCCGCATA  
TACTCTTCGAGTTGTGTAAGTTTCGTCCTAAAAGGACTCGTCAGGTAGCCTACTAGACTACGACTTA  
CACGGTAGGTCGTGAACAAGCCCGGAGTACATCTCCTTTGGAAGTGGAGACCCCTCCGGTCTTGTCC

```
+
FFFFFFFFFFFFFFFF:FFFFFFFFFFFFFFFFFFFFFFFFFFFFFFFFFFFFFFFF
```

FFFF:FFFFFFFFFFFFFFFFFFFFFFFFFFFFFFFFFFFFFFFFFFFFFFFFFFFFFFFFFFFFFFFFFFFFFFFFFFFFFFFF  
@A00155:342:HHGFNDSXY:1:1551:23122:2707 2:N:0:GAACCTAG+TCCGCATA

GGAGTACATCTCCTTTGGAAGTGGAGACCCCTCCGGTCTTGTCCAACCTCTGTTTCGGCAGAGGATA  
CCGTGCTCCACAGCTGTAAGGCTGTGGGCCCCGAGAGAAGTCGCTCTCTCTCGCCCTCCACATCCCTCT  
+

[illegible]

@A00155:342:HHGFNDSXY:1:1551:31485:20290 2:N:0:GAACCTAG+TCCGCATA  
GTACATCTCCTTTGGAAGTGGAGACCCCTCCGGTCTTGTCCAACCTCTGTTTCGGCAGAGGATACCG  
TGCTCCACAGCTGTAAGGCTGTGGGCCCGAGAGAAGTCGCTCTCTCTCGCCCTCTACATCCCTCTCG

```
+
F:FFFFFFFFFFFFFFFF:FFFFFFFFFFFFFFFF::F:FFFFFFFF:FFF,FFFF:FFFF:FFFF
```

FFFFFFFF:FF,FF,,FFF:FFFFFFFFFFFFFFFF:F:FFFFFFFFFFFFFFFFFFFFFFFF:FFFF:FFFF  
@A00155:342:HHGFNDSXY:1:1551:9381:30545 2:N:0:GAACCTAG+TCCGCATA

CTGGCCTATGGTCATCTCAATGCCGAGAGGGATGTGAAGGGCGAGAGAGAGCGACTTCTCTCGGGCCC  
ACAGCCTTACAGCTGTGGAGCACGGTATCCTCTGCCGAAACAGAGGTTGGACAAGACCGG

```

+
FFFFFFFFFFFFFFFFFFFFFFFFFFFFFFFF:FFFFFFFFFFFF:FFFFFFFFFFFFFFFFFFFFFFFF:FFFFFFFFFFFF

```

FFFFFFFFFFFFFFFFFFFFFFFFFFFFFFFFFFFFFFFFFFFFFFFFFFFFFFFFFFFFFFFFFFFFFFFFFFFFFFFF  
@A00155:342:HHGFNDSXY:1:1552:16260:3881 2:N:0:GAACCTAG+TCCGCATA

TCCTAAAAAGGACTCGTCAGGTAGCCTACTAGACTACGACTTACACGGTAGGTCTGTGAACAAGCCCGG  
AGTACATCTCCTTTGGAAGTAGGAGACCCCTCCGGTCTTGTCCAACCTCTGTTTCGGCAGAGGATACC  
+

[illegible]

@A00155:342:HHGFNDSXY:1:1552:22688:10723 2:N:0:GAACCTAG+TCCGCATA  
CTAGTTCCAAAGGAGATGTACTCCGGGCTTGTTACGACCTACCGTGTAAAGTCGTAGTCTAGTAGGCT  
ACCTGACGAGTCCTTTTTAGGACGAACTTACACAACCTCGAAGAGTAACGACGGTTTCGTCCTTGGA

[illegible]

```

FFFFFFFFFFFFFFFFFFFFFFFFFFFFFFFF:FFFFFFFFFFFFFFFFFFFFFFFFFFFF:FF:FFF:FFFFFFF:

```

@A00155:342:HHGFNDSXY:1:1552:19180:20932 2:N:0:GAACCTAG+TCCGCATA  
CAGGTAGCCTACTAGACTACGACTTACACGGTAGGTCGTGAACAAGCCCCGAGTACATCTCCTTTGGA  
ACTAGGAGACCCCTCCGGTCTTGTCCAACCTCTGTTTCGGCAGAGGATACCGTGCTCCACAGCTGTAA  
+  
FFFFFFFFFFFFFFFFFFFFFFFFFFFFFFFFFFFFFFFFFFFFFFFFFFFFF, FFFFFFFFFFFFFFFF, FF:FF  
:FFFFFFFFFFFFFFFFFFFFFFFFFFFFFFFFFFFFFFFFFFFFFFFFFFFF: FFFFFFFFFF: FFF: FFFFFFFFFF, F:F:  
@A00155:342:HHGFNDSXY:1:1552:32090:23249 2:N:0:GAACCTAG+TCCGCATA  
GTTTCGTCTAAAAAGGACTCGTCAGGTAGCCTACTAGACTACGACTTACACGGTAGGTCGTGAACAA  
GCCCGGAGTACATCTCCTTTGGAAGTACTAGGAGACCCCTCCGGTCTTGTCCAACCTCTGTTTCGGCAGAG  
+  
FFFF: FFFFFFFFFFFFFFFFFFFFFFFFFFFFFFFFFFFFFFFFFFFFFFFFFFFFFFFFFFFFFFFFFFFFFFFFFFFFFF  
FFFFFFFFFFFFFFFFFFFFF: FFFFFFFFFFFFFFFFFFFFFFFFFFFFFFFFFFFFFFFFFFFFFFFFFFFFFF: FFFFFFFFFFFFFFFF  
@A00155:342:HHGFNDSXY:1:1553:13810:9314 2:N:0:GAACCTAG+TCCGCATA  
GCCCGGAGTACATCTCCTTTGGAAGTACTAGGAGACCCCTCCGGTCTTGTCCAACCTCTGTTTCGGCAGAG  
GATACCGTGCTCCACAGCTGTAAGGCTGTGGGCCCGAGAGAAGTCGCTCTCTCGCCC  
+  
FFFFFFFFFFFFFFFFFFFFFFFFFFFFFFFFFFFFFFFFFFFFFFFFFFFFFFFFFFFFFFFFFFFFFFFFFFFFFFFFFFFFF  
FFFFFFFFFFFFFFFFFFFFF: FFFFFFFFFFFFFFFFFFFFFFFFFFFFFFFFFFFFFFFFFFFFFFFFFFFFFF  
@A00155:342:HHGFNDSXY:1:1553:23113:19163 2:N:0:GAACCTAG+TCCGCATA  
GGACTCACCTCTGGCCTATGGTCATCTCAATGCCGAGAGGGATGTAGAGGGCGAGAGAGAGCGACTTC  
TCTCGGGCCACAGCCTTACAGCTGTGGAGCACGGTATCCTCTGCCGAAACAGAGGTTGACAAGACC  
+  
FFFFFFFFFFFFFFFFFFFFFFFFFFFFFFFFFFFFFFFFFFFFFFFFFFFFFFFFFFFFFFFFFFFFFFFFFFFFFFFFFFFFF  
FFFF: FFFFFFFFFFFFFFFFFFFFFFFFFFFFFFFFFFFFFFFFFFFFFFFFFFFFFFFFFFFFFFFFFFFFFFFFFFFFFF: FFFFFFFFFF  
@A00155:342:HHGFNDSXY:1:1553:7554:23563 2:N:0:GAACCTAG+TCCGCATA  
CACGGTAGGTCGTGAACAAGCCCCGAGTACATCTCCTTTGGAAGTACTAGGAGACCCCTCCGGTCTTGTCC  
AACCTCTGTTTCGGCAGAGGATACCGTGCTCCACAGCTGTAAGGCTGTGGGCCCGAGAGAAGTCGCTC  
+  
FFFFFFFFFFFFFFFFFFFFFFFFFFFFFFFFFFFFFFFFFFFFFFFFFFFFFFFFFFFFFFFFFFFFFFFFFFFFFFFFFFFFF  
: FFFFFFFFFFFFFFFFFFFFFFFFFFFFFFFFFFFFFFFFFFFFFFFFFFFFFFFFFFFFFFFFFFFFFFFFFFFFFF  
@A00155:342:HHGFNDSXY:1:1553:24334:28604 2:N:0:GAACCTAG+TCCGCATA  
CTACGACTTACACGGTAGGTCGTGAACAAGCCCCGAGTACATCTCCTTTGGAAGTACTAGGAGACCCCTCC  
GGTCTTGTCCAACCTCTGTTTCGGCAGAGGATACCGTGCTCCACAGCTGTAAGGCTGAGGGCCCGAGA  
+  
FFFFFFFFFFFFFFFFFFFFFFFFFFFFFFFFFFFFFFFFFFFFFFFFFFFFFFFFFFFFFFFFFFFFFFFFFFFFFFFFFFFFF  
FFFFFFFFFFFFFFFFFFFFF, FFFFFFFFFFFFFFFF: FFFFFFFFFFFFFFFFFFFFFFFFFFFFFF: F  
@A00155:342:HHGFNDSXY:1:1553:9073:34585 2:N:0:GAACCTAG+TCCGCATA  
GTTTCGTCTAAAAAGGACTCGTCAGGTAGCCTACTAGACTACGACTTACACGGTAGGTCGTGAACAA  
GCTCGGAGTACATCTCCTTTGGAAGTACTAGGAGACCCCTCCGGTCTTGTCCAACCTCTGTTTCGGCAGAG  
+  
FFFFFFFFFFFFFFFFFFFFFFFFFFFFFFFFFFFFFFFFFFFFFFFFFFFFFFFFFFFFFFFFFFFFFFFFFFFFFFFFFFFFF  
FFFFFFFFFFFFFFFFFFFFF, FFFFFFFFFFFFFFFF: FFFFFFFFFFFFFFFFFFFFFFFFFFFFFF: F  
@A00155:342:HHGFNDSXY:1:1554:29008:7200 2:N:0:GAACCTAG+TCCGCATA  
GGAACGGACTCATCAGGGAGCCTACTAGACTCCGACCGTCATGGGGGTTCAAACCCATGCCCGCCAC  
ACCGCCTTAGATCAGCTGTGTCCACTTAAGGACTCACCTCTGGCCTATGGTCATCTCAATGCCGAGAG  
+  
FFFFFFFFFFFFFFFFFFFFFFFFFFFFFFFFFFFFFFFFFFFFFFFFFFFFFFFFFFFFFFFFFFFFFFFFFFFFFFFFFFFFF  
FFFFFFFFFFFFFFFFFFFFF, FFFFFFFFFFFFFFFF: FFFFFFFFFFFFFFFFFFFFFFFFFFFFFF: F  
@A00155:342:HHGFNDSXY:1:1554:17644:9314 2:N:0:GAACCTAG+TCCGCATA  
CAGGTAGCCTACTAGACTACGACTTACACGGTAGGTCGTGAACAAGCCCCGAGTACATCTCCTTTGGA  
ACTAGGAGACCCCTCCGGTCTTGTCCAACCTCTGTTTCGGCAGAGGATACCGTGCTCCACAGCTGTAA  
+  
FFFFFFFFFFFFFFFFFFFFFFFFFFFFFFFFFFFFFFFFFFFFFFFFFFFFFFFFFFFFFFFFFFFFFFFFFFFFFFFFFFFFF  
: F: FFFFFFFFFFFFFFFFFFFFFF: FFFFFFFFFFFFFFFF: FFFFFFFFFFFFFF: FFFFFFFFFFFFFFFFFFFFFF

@A00155:342:HHGFNDSXY:1:1554:6008:13745 2:N:0:GAACCTAG+TCCGCATA  
ACATCTCCTTTGGAAGTAGGAGACCCCTCCGGTCTTGTCCAACCTCTGTTTCGGCAGAGGATACCGTG  
CTCCACAGCTGTAAGGCTGTGGGCCCCGAGAGAAGTCGCTCTCTCTCGCCCTCTACATCCC

[illegible]

+

[illegible]

+

[illegible]

+

[illegible]

+

[illegible]

+

```
FFFF,FFFFFFFFFFFFFFFFFFFFFFFFFFFFFFFFFFFFFFFF:FFFFFFFFFFFF,FFFFFFFFFFFFFFFFFFFF
FFFFFFFFFFFFFFFFFFFF:FFFFFFFFFFFFFFFFFFFFFFFFFFFFFFFFFFFFFFFFFFFFFFFFFFFFFFFFFFFF
```

 $+$ [illegible] $+$ 

```
FFFFFFFFFFFFFFFFFFFFFFFFFFFFFFFFFFFFFFFFFFFFFFFFFFFFFFFFFFFFFFFFFFFFF:FFF:FF  
EEEEEEEEE EEEEEEEEEEEEEEEEEEEEE.EE.EEEEEEEEEEEEEEEEEEEEEEEEE
```

 $\perp$ [illegible]

```
@A00155:342:HHGFNDSXY:1:1555:2772:34914 2:N:0:GAACCTAG+TCCGCATA
TCGTGAACAAGCCCCGAGTACATCTCCTTTGGAAGTAGGAGACCCCTCCGGTCTTGCCAACCTCTGT
TTCGGCAGAGGATACCGTGCTCCACAGCTGTAAGGCTGTGGGCCCGAGAGAAGTCGCTCTCTCTCGCC
+
FFFFFFFFFFFFFFFFFFFFFFFFFFFFFFFFFFFFFFFFFFFFFFFFFFFFFFFFFFFFFFFFFFFFFFFFFFFFF
FFFFFFFFFFFFFFFFFFFFFFFFFFFFFFFFFFFFFFFFFFFFFFFFFFFFFFFFFFFFFFFFFFFFFFFFFFFF:FFFFFFFFF:FFFFFFFFFFFFFFF
@A00155:342:HHGFNDSXY:1:1556:4020:6981 2:N:0:GAACCTAG+TCCGCATA
CCTCTGGCCTATGGTCATCTCAATGCCGAGAGGGATGTGAAGGGCGAGAGAGAGCGACTTCTCTCGGG
CCCACAGCCTTACAGCTGTGGAGCACGGTATCCTCTGCCGAAACAGAGGTTGGACAAGACCGG
+
FFFFFFFFFFFFFFFFFFFFFFFFFFFFFFFFFFFFFFFFFFFFFFFFFFFFFFFFFFFFFFFFFFFFFFFFFFFFF
FFFFFFFFFFFFFFFFFFFFFFFFFFFFFFFFFFFFFFFFFFFFFFFFFFFFFFFFFFFFFFFFFFFFFFFFFFFF:FFFFFFFFF:FFFFFFFFFFFFFFF
@A00155:342:HHGFNDSXY:1:1556:1823:12070 2:N:0:GAACCTAG+TCCGCATA
CCTTTTTAGGACGAACTTACACAACCTCAAAGAGTAACGACGGTTTCGTCTTGGAACGGACTCATCA
GGGAGCCTACTAGACTCCGACCGTCATGGGGGTTCAAACCCATGCCCCGCCACACCGCCTTAGATCAG
+
FFFFFFFFFFFFFFFFFFFFFFFFFFFFFFFFFFFFFFFFFFFFFFFFFFFFFFFFFFFFFFFFFFFFFFFFFFFFF
FFFFFFFFFFFFFFFFFFFFFFFFFFFFFFFFFFFFFFFFFFFFFFFFFFFFFFFFFFFFFFFFFFFFFFFFFFFF:FFFFFFFFF:FFFFFFFFFFFFFFF
@A00155:342:HHGFNDSXY:1:1556:7563:12336 2:N:0:GAACCTAG+TCCGCATA
GGTCTTGCCAACCTCTGTTCGGCAGAGGATACCGTGCTCCACAGCTGTAAGGCTGTGGGCCCGAGA
GAAGTCGCTCTCTCTCGCCCTCCACATCCCTCTCGGCATTGAGATGACCATAGGCCAGAGGAGAGTCC
+
FFFFFFFFFFFFFFFFFFFFFFFFFFFFFFFFFFFFFFFFFFFFFFFFFFFFFFFFFFFFFFFFFFFFFFFFFFFFF
FFFFFFFFFFFFFFFFFFFFFFFFFFFFFFFFFFFFFFFFFFFFFFFFFFFFFFFFFFFFFFFFFFFFFFFFFFFF:FFFFFFFFF:FFFFFFFFFFFFFFF
@A00155:342:HHGFNDSXY:1:1557:27914:3396 2:N:0:GAACCTAG+TCCGCATA
AGGACGAAACCGTCGTTACTCTTTGAGTTGTGTAAGTTTCGTCTAAAAGGACTCGTCAGGTAGCCT
ACTAGACTACGACTTACACGGTAGGTCGTGAACAAGCCCGAGTACATCTCCTTTGGAACCTAGGAGAC
+
FFFFFFFFFFFFFFFFFFFFFFFFFFFFFFFFFFFFFFFFFFFFFFFFFFFFFFFFFFFFFFFFFFFFFFFFFFFFF
FFFFFFFFFFFFFFFFFFFFFFFFFFFFFFFFFFFFFFFFFFFFFFFFFFFFFFFFFFFFFFFFFFFFFFFFFFFF:FFFFFFFFF:FFFFFFFFFFFFFFF
@A00155:342:HHGFNDSXY:1:1557:8892:18427 2:N:0:GAACCTAG+TCCGCATA
TCCTTTGGAACCTAGGAGACCCCTCCGGTCTTGCCAACCTCTGTTTCGGCAGAGGATACCGTGCTCCA
CAGCTGTAAGGCTGTGGGCCCGAGAGAAGTCGCTCTCTCTCGCCCTCCACATCCCTCTCGG
+
FFFFFFF,F,FF:FF::F,:FFFFFFFFFFFFFFF,FFFF,FFFFFF,FFF:FFFFFFFFF,FFFFFFFFF
FFFFFFFFFFFFFFF,FFFFFFFFFFFFFFF,,FFFFFFFFFFFFFFFFFFFFFFFF:FFFFFFFFF
@A00155:342:HHGFNDSXY:1:1557:15881:32503 2:N:0:GAACCTAG+TCCGCATA
GAACCTAGGAGACCCCTCCGGTCTTGCCAACCTCTGTTTCGGCAGAGGATACCGTGCTCCACAGCTGT
AAGGCTGTGGGCCCGAGAGAAGTCGCTCTCTCTCGCCCTCCACATCCCTCTCGGCATTGAGATGAC
+
FFFFFFFFFFFFFFFFFFFFFFFFFFFFFFFFFFFFFFFFFFFFFFFFFFFFFFFFFFFFFFFFFFFFFFFFFFFFF
FFFFF:FFFFFFFFFFFFFFF:FFFFFFFFFFFFFFFFFFFFFFFFFFFFFFFFFFFFFFFFFFFFFFFFFFFF:FFFFFFFFF
@A00155:342:HHGFNDSXY:1:1557:29243:34319 2:N:0:GAACCTAG+TCCGCATA
CTTTTTAGGACGAACTTACACAACCTCGAAGAGTAACGACGGTTTCGTCTTGGAACGGACTCATCAG
GGAGCCTACTAGACTCCGACCGTCATGGGGGTTCAAACCCATGCCCCGCTACACCGCCTTAGATCAGC
+
FFFFFFFFFFFFFFFFFFFFFFFFFFFFFFFFFFFFFFFFFFFFFFFFFFFFFFFFFFFFFFFFFFFFFFFFFFFFF
FFFFFFFFFFFFFFFFFFFFFFFFFFFFFFFFFFFFFFFFFFFFFFFFFFFFFFFFFFFFFFFFFFFFFFFFFFFF:FFFFFFFFF
@A00155:342:HHGFNDSXY:1:1558:10077:17722 2:N:0:GAACCTAG+TCCGCATA
GAAACCGTCGTTACTCTTTGAGTTGTGTAAGTTTCGTCTAAAAGGACTCGTCAGGTAGCCTACTAG
ACTACGACTTACACGGTAGGTCGTGAACAAGCCCGAGTACATCTCCTTTGGAACCTAGGAGACCCCTC
```

[illegible]

[illegible]

[illegible]



[illegible]

@A00155:342:HHGFNDSXY:1:1569:4444:13855 2:N:0:GAACCTAG+TCCGCATA  
CTGGCCTATGGTCATCTCAATGCCGAGAGGGATGTGAAGGGCGAGAGAGAGCGACTTCTCTCGGGCCC  
ACAGCCTTACAGCTGTGGAGCACGGTATCCTCTGCCGAAACAGAGGTTGGACAAGACCGGAG  
+  
FFFFFFFFF:FFFFFFFFFFFFFFFFFFFFFFFFFFFFFFFFFFFFFFFFFFFFFFFFFFFFFFFFF  
FF,FFFFFFFFFFFFFFFFFFFFFFFFFFFFFFFFFFFFFFFFFFFFFFFFFFFFFFFFFFFFFFFFF  
@A00155:342:HHGFNDSXY:1:1569:1542:17534 2:N:0:GAACCTAG+TCCGCATA  
CTCCACAGCTGTAAGGCTGTGGGCCCCGAGAGAAGTCGCTCTCTCGCCCTCCACATCCCTCTCGGCA  
TTGAGATGACCATTGGCCAGAGGTGAGTCCTTAAGTGGACACAGCTGATCTAAGGCGGTGTGGCG  
+  
FFFFFFFFFFFFFFFFFFFFFFFFFFFFFFFFFFFFFFFFFFFFFFFFFFFFFFFFFFFFFFFFF:FFFFFFF  
FFFFFFFFFFFFFFFFFFFFFFFFFFFFFFFFFFFFFFFFFFFFFFFFFFFFFFFFFFFFFFFFF,:FFFFFFFFF,FFFF:FFFFF  
@A00155:342:HHGFNDSXY:1:1569:21522:21073 2:N:0:GAACCTAG+TCCGCATA  
CACGGTAGTCTGTAACAAGCCCGAGTACATCTCCTTTGGAAGTAGGAGACCCCTCCGGTCTTGTCC  
AACCTCTGTTTCGGCAGAGGATACCGTGCTCCACAGCTGTAAGGCTGTGGGCCCCGAGAGAAGTCGCTC  
+  
FFFFFFFFFFFFFFFFFFFFFFFFFFFFFFFFFFFFFFFFFFFFFFFFFFFFFFFFFFFFFFFFF,FFFFF  
FFFFFFFFFFFFFFFFFFFFFFFFFFFFFFFFFFFFFFFFFFFFFFFFFFFFFFFFFFFFFFFFF:FFFFFFFFFFFFFFFFF  
@A00155:342:HHGFNDSXY:1:1569:29668:26882 2:N:0:GAACCTAG+TCCGCATA  
CTAGGAGACCCCTCCGGTCTTGTCCAACCACTGTTTCGGCAGAGGATACCGTGCTCCACAGCTGTAAG  
GCTGTGGGCCCCGAGAGAAGTCGCTCTCTCTCGCCCTCCACATCCCTCTCGGCATTGAGATGACCATA  
+  
F,FFFFFFFF,FFFF:FF,,FFF:FFF:,F:,F,,FFFFFFFF:,FFFFFFF,,FFFFFFF:FFFFFF  
FFFFFFFFFFFFFFFFF:FFF:,FFFFFFFFF:FFFFFFFFFFFFFFFFFFFFFFFFF,FFFFFFFFF,FFFF:F  
@A00155:342:HHGFNDSXY:1:1569:17183:35790 2:N:0:GAACCTAG+TCCGCATA  
TCCTAAAAAGGACTCGTCAGGTAGCCTACTAGACTACGACTTACACGGTAGGTCTGTAACAAGCCCGG  
AGTACATCTCCTTTGGAACCAGGAGACCCCTCCGGTCTTGTCCAACCTCTGTTTCGGCAGAGGATACC  
+  
FFFFFFFFFFFFFFFFFFFFFFFFFFFFFFFFFFFFFFFFFFFFFFFFFFFFFFFFFFFFFFFFF:FFFFFFFFFFFFFFFFF  
FFFFFFFFFFFF,FFFFFFFFFFFFFFFFFFFFFFFFFFFFFFFFF,FFFFFFFFFFFFFFFFFFFFFFFFF  
@A00155:342:HHGFNDSXY:1:1569:17192:35806 2:N:0:GAACCTAG+TCCGCATA  
TCCTAAAAAGGACTCGTCAGGTAGCCTACTAGACTACGACTTACACGGTAGGTCTGTAACAAGCCCGG  
AGTACATCTCCTTTGGAACCAGGAGACCCCTCCGGTCTTGTCCAACCTCTGTTTCGGCAGAGGATACC  
+  
FFFFFFFFFFFFFFFFFFFFFFFFFFFFFFFFFFFFFFFFFFFFFFFFFFFFFFFFFFFFFFFFF  
FFFFFFFFFFFF:FFFFFFFFF:FFFFFFFFFFFFFFFFFFFFFFFFFFFFFFFFFFFFFFFFF  
@A00155:342:HHGFNDSXY:1:1570:10592:5525 2:N:0:GAACCTAG+TCCGCATA  
GAACCAGGAGACCCCTCCGGTCTTGTCCAACCTCTGTTTCGGCAGAGGATACCGTGCTCCACAGCTGT  
AAGGCTGTGGGCCCCGAGAGAAGTCGCTCTCTCTCGCCCTCCACATCCCTCTCGGCATTGAGATGACCA  
+  
FFFFFFFFFFFFFFFFFFFFFFFFFFFFFFFFFFFFFFFFF:F:FFFFFFFFFFFFFFFFFFFFFFFFF:  
F:FFFFFFFFFFFFFFFFFFFFFFFFFFFFFFFFFFFFFFFFFFFFFFFFFFFFFFFFFFFFFFFFF  
@A00155:342:HHGFNDSXY:1:1570:14253:8672 2:N:0:GAACCTAG+TCCGCATA  
CTTCGAGTTGTGTAAGTTTCGTCCTAAAAAGGACTCGTCAGGTAGCCTACTAGACTACGACTTACACG  
GTAGGTCGTGAACAAGCCCGGAGTACATCTCCTTTGGAAGTAGGAGACCCCTCCGGTCTTGTCCAACC  
+  
FFFFFFFFFFFFFFFFFFFFFFFFFFFFFFFFFFFFFFFFFFFFFFFFFFFFFFFFFFFFFFFFF  
FFFFFFFFFFFFFFFFF,FFFFFFFFF:FFFFFFFFFFFFFFFFFFFFFFFFF:FFFFFFFFFFFFFFFFF  
@A00155:342:HHGFNDSXY:1:1571:14145:2942 2:N:0:GAACCTAG+TCCGCATA  
GTAGCCTACTAGACTACGACTTACACGGTAGGTCTGTAACAAGCCCGGAGTACATCTCCTTTGGAAGT  
AGGAGACCCCTCCGGTCTTGTCCAACCTCTGTTTCGGCAGAGGATACCGTGCTCCACAGCTGTTAGGC  
+  
FFFFFFFFFFFFFFFFFFFFFFFFFFFFFFFFFFFFFFFFFFFFFFFFFFFFFFFFFFFFFFFFF  
FFFFFFFFFFFFFFFFF::FFFFFFFFFFFFFFFFFFFFFFFFF:FFFFFFFFFFFFFFFFFFFFFFFFF:



@A00155:342:HHGFNDSXY:1:1573:21305:28839 2:N:0:GAACCTAG+TCCGCATA  
ACTCTTCGAGTTGTGTAAGTTTTCGTCCTAAAAAGGACTCGTCAGGTAGCCTACTAGACTACGACTTAC  
ACGGTAGGTCGTGAACAAGCCCCGGAGTACATCTCCTTTGGAAGTACCAGACCCCCTCCGGTCTTGTCCTCA  
+  
FFFFFFFFFFFFFFF:FFFFFFFFFFFFFFFFFFFFFFFFFFFFFFFFFFFFFFFFFFFFFFFFFFFFFFFFFFFFF  
FFFFFFFFFFFFFFFFFFFFFFF:FFFFFFFFFFFFFFF:FFFFFFFFFFFFFFFFFFFFFFFFFFFFFFFFFFFFFFFFF  
@A00155:342:HHGFNDSXY:1:1573:8504:33098 2:N:0:GAACCTAG+TCCGCATA  
TAGACTACGACTTACACGGTAGGTCGTGAACAAGCCCCGGAGTACATCTCCTTTGGAAGTACCAGACCCC  
CTCCGGTCTTGTCCTAACCTCTGTTTCGGCAGAGGATACCGTGCTCCACAGCTGTAAGGCTGTGGGCC  
+  
FFFFFFFFFF:FFFFFFFFFFFFFFFFFFFFFFFFFFFFFFFFFFFFFFFFFFFFFFFFFFFFFFFFFFFFF:FFFFFFF  
FFFFFFFFFFFFFFFFFF:FFFFFFFFFFFFFFFFFFFFFFFFFFFFFFFFFFFFFFFFFFFFFFFFFFFF,F  
@A00155:342:HHGFNDSXY:1:1573:8250:33599 2:N:0:GAACCTAG+TCCGCATA  
TAGACTACGACTTACACGGTAGGTCGTGAACAAGCCCCGGAGTACATCTCCTTTGGAAGTACCAGACCCC  
CTCCGGTCTTGTCCTAACCTCTGTTTCGGCAGAGGATACCGTGCTCCACAGCTGTAAGGCTGTGGGCC  
+  
FFFFFFFFFFFFFFFFFFFFFFFFFFFFFFFFFFFFFFFFFFFFFFFFFFFFFFFFFFFFFFFFFFFFFFFFFFFFF  
FFFFFFFFFFFFFFFFFFFFFFFFFFFFFFFFFFFFFFFFFFFFFFFFFFFFFFFFFFFFFFFFFFFFFFFFFFFFF  
@A00155:342:HHGFNDSXY:1:1574:8684:29904 2:N:0:GAACCTAG+TCCGCATA  
AGGACGAAACCGTCGTTACTCTTCGAGTTGTGTAAGTTTCGTCCTAAAAAGGACTCGTCAGGTAGCCT  
ACTAGACTACGACTTACACGGTAGGTCGTGAACAAGCCCCGGAGTACATCTCCTTTGGAAGTACCAGAC  
+  
FFFFFFFFFFF:F,FF:FFFFF,FFFFFFFFFFFFFFFFF,FFFFFFFFFFFFFFFFFFFFF:FFF:FFF:FFFF  
,FFF:FFFFFFFF,:FFFFFFFFF:FFF:FFFFF,F:FFFFFF:FF:FFFF:FFFF,FFFFFFFFF  
@A00155:342:HHGFNDSXY:1:1574:4001:33285 2:N:0:GAACCTAG+TCCGCATA  
GTGAACAAGCCCCGGAGTACATCTCCTTTGGAAGTACCAGACCCCCTCCGGTCTTGTCCTAACCTCTGTTT  
CGGCAGAGGATACCGTGCTCCACAGCTGTAAGGCTGTGGGCCCGAGAGAAGTCGCTCTCTCTCGCCCT  
+  
FFFFFFFFFFFFFFFFFFFFFFFFFFFFFFFFFFFFFFFFFFFFFFFFFFFFFFFFFFFFFFFFFFFFF,FFFFFFFFFFFFFFFFF  
FFFFFFFFFFFFFFFFFFFFFFFFFFFFFFFFFFFFFFFFFFFFFFFFFFFFFFFFFFFFFFFFFFFFF:FFFFF:FFFFFFFFF  
@A00155:342:HHGFNDSXY:1:1575:1551:1485 2:N:0:GAACCTAG+TCCGCATA  
GTTTCGTCCTAAAAAGGACTCGTCAGGTAGCCTACTAGACTACGACTTACACGGTAGGTCGTGAACAA  
GCCCCGAGTACATCTCCTTTGGAAGTACCAGACCCCCTCCGGTCTTGTCCTAACCTCTGTTTCGGCAGAG  
+  
FFFFFFFFFFFFFFFFFFFFFFFFFFFFFFFFFFFFFFFFFFFFFFFFFFFFFFFFFFFFFFFFFFFFF:FFFFFFFFF:FFFFFFFFF:FFFF:F  
FFFFFFFFFFFFFFFFFFFFFFFFFFFFFFFFFFFFFFFFFFFFF:FFFFFFFFFFFFFFFFFFFFFFFFFFFFFFFFFFFFF  
@A00155:342:HHGFNDSXY:1:1575:13928:26083 2:N:0:GAACCTAG+TCCGCATA  
AAGGACGAAACCGTCGTTACTCTTCGAGTTGTGTAAGTTTCGTCCTAAAAAGGACTCGTCAGGTAGCC  
TACTAGACTACGACTTACACGGTAGGTCGTGAACAAGCCCCGGAGTACATCTCCTTTGGAACCAGGAG  
+  
FFFFFFFFFFFFFFFFFFFFFFFFFFFFFFFFFFFFFFFFFFFFF:FFFFFFFFFFFFF:F:FFFFFFFFF:FFFFFFFFF  
FFFFFFFFFFFFFFFFFFFFFFFFFFFFFFFFFFFFFFFFFFFFF,F,FFFFFFFFFFFFFFFFFFFFF,FFFFFFFFFFFFF  
@A00155:342:HHGFNDSXY:1:1576:6180:29951 2:N:0:GAACCTAG+TCCGCATA  
GAACCAGGAGACCCCCTCCGGTCTTGTCCTAACCTCTGTTTCGGCAGAGGATACCGTGCTCCACAGCTGT  
AAGGCTGTGGGCCCGAGAGAAGTCGCTCTCTCTCGCCCTCCACATCCCTCTCGGCATTGAGATGACCA  
+  
FFFFFFFFFFFFFFFFFFFFFFFFFFFFFFFFFFFFF,FFF:FFFFFFFFFFFFFFFFFFFFFFFFFFFFFFFFFFFFF  
F:FFFFFFFFFFFFFFFFFFFFFFFFFFFFFFFFFFFFFFFFFFFFF:FFFFFFFFFFFFF:FFFFFFFFFFFFF  
@A00155:342:HHGFNDSXY:1:1577:16721:11945 2:N:0:GAACCTAG+TCCGCATA  
AACAAGCCCCGAGTACATCTCCTTTGGAAGTACCAGACCCCCTCCGGTCTTGTCCTAACCTCTGTTTCGG  
CAGAGGATACCGTGCTCCACAGCTGTAAGGCTGTGGGCCCGAGAGAAGTCGCTCTCTCTCGCCCT

[illegible]

@A00155:342:HHGFNDSXY:1:1601:11216:23766 2:N:0:GAACCTAG+TCCGCATA  
CACGGTAGGTCGTGAACAAGCCCCGGAGTACATCTCCTTTGGAACCAGGAGACCCCTCCGGTCTTGTC  
AACCTCTGTTTCGGCAGAGGATACCGTGCTCCACAGCTGTAAGGCTGTGGGCCCGAGAGAAGTCGCTC  
+  
FFFFFFFFFFFFFFFFFFFFFFFFFFFFFFFFFFFFFFFFFFFFFFFFFFFFFFFFFFFFFFFFFFFFFFFFFFFFF  
FFFFFFFFFFFFFFFFFFFFFFFFFFFFFFFFFFFFFFFFFFFFFFFFFFFFFFFFFFFFFFFFFFFFFFFFFFFFF  
@A00155:342:HHGFNDSXY:1:1601:12373:25895 2:N:0:GAACCTAG+TCCGCATA  
TAGCCTACTAGACTACGACTTACACGGTAGGTCGTGAACAAGCCCCGGAGTACATCTCCTTTGGAAC  
GGAGACCCCTCCGGTCTTGTC AACCTCTGTTTCGGCAGAGGATACCGTGCTCCACAGCTGTAAGGC  
+  
FFFFFFFFFFFFFFFFFFFFFFFFFFFFFFFFFFFFFFFFFFFFFFFFFFFFFFFFFFFFFFFFFFFFFFFFFFFFF  
FFFFFFFFFFFFFFFFFFFFFFFFFFFFFFFFFFFFFFFFFFFFFFFFFFFFFFFFFFFFFFFFFFFFFFFFFFFFF  
@A00155:342:HHGFNDSXY:1:1601:16080:30655 2:N:0:GAACCTAG+TCCGCATA  
ACTAGACTACGACTTACACGGTAGGTCGTGAACAAGCCCCGGAGTACATCTCCTTTGGAACCAGGAGAC  
CCCTCCGGTCTTGTC AACCTCTGTTTCGGCAGAGGATACCGTGCTCCACAGCTGTAAGGCTGTGGGC  
+  
FFFFFFFFFFFFFFFFFFFFFFFFFFFFFFFFFFFFFFFFFFFFFFFFFFFFFFFFFFFFFFFFFFFFFFFFFFFFF  
FFFFFFFFFFFFFFFFFFFFFFFFFFFFFFFFFFFFFFFFFFFFFFFFFFFFFFFFFFFFFFFFFFFFFFFFFFFFF  
@A00155:342:HHGFNDSXY:1:1601:14570:31704 2:N:0:GAACCTAG+TCCGCATA  
ACTAGACTACGACTTACACGGTAGGTCGTGAACAAGCCCCGGAGTACATCTCCTTTGGAACCAGGAGAC  
CCCTCCGGTCTTGTC AACCTCTGTTTCGGCAGAGGATACCGTGCTCCACAGCTGTAAGGCTGTGGGC  
+  
FFFFFFFFFFFFFFFFFFFFFFFFFFFFFFFFFFFFFFFFFFFFFFFFFFFFFFFFFFFFFFFFFFFFFFFFFFFFF  
FFFFFFFFFFFFFFFFFFFFFFFFFFFFFFFFFFFFFFFFFFFFFFFFFFFFFFFFFFFFFFFFFFFFFFFFFFFFF  
@A00155:342:HHGFNDSXY:1:1602:6153:15060 2:N:0:GAACCTAG+TCCGCATA  
GGACTCGTCAGGTAGCCTACTAGACTACGACTTACACGGTAGGTCGTGAACAAGCCCCGGAGTACATCT  
CCTTTGGAAGTAGGAGACCCCTCCGGTCTTGTC AACCTCTGTTTCGGCAGAGGATACCGTGCTCCAC  
+  
FFFFFFFFFFFFFFFFFFFFFFFFFFFFFFFFFFFFFFFFFFFFFFFFFFFFFFFFFFFFFFFFFFFFFFFFFFFFF  
FFFFFFFFFFFFFFFFFFFFFFFFFFFFFFFFFFFFFFFFFFFFFFFFFFFFFFFFFFFFFFFFFFFFFFFFFFFFF  
@A00155:342:HHGFNDSXY:1:1603:10999:3881 2:N:0:GAACCTAG+TCCGCATA  
AGTACATCTCCTTTGGAAGTAGGAGACCCCTCCGGTCTTGTC AACCTCTGTTTCGGCAGAGGATACCG  
GTGCTCCACAGCTGTAAGGCTGTGGGCCCGAGAGAAGTCGCTCTCTCTCGCCCTCCACATCCCTCTCG  
+  
FFFFFFFFFFFFFFFFFFFFFFFFFFFFFFFFFFFFFFFFFFFFFFFFFFFFFFFFFFFFFFFFFFFFFFFFFFFFF  
FFFFFFFFFFFFFFFFFFFFFFFFFFFFFFFFFFFFFFFFFFFFFFFFFFFFFFFFFFFFFFFFFFFFFFFFFFFFF  
@A00155:342:HHGFNDSXY:1:1603:1253:24987 2:N:0:GAACCTAG+TCCGCATA  
AGTTGTGTAAGTTTCGTCCTAAAAAGGACTCGTCAGGTAGCCTACTAGACTACGACTTACACGGTAGG  
TCGTGAACAAGCCCCGGAGTACATCTCCTTTGGAAGTAGGAGACCCCTCCGGTCTTGTC AACCTCTGT  
+  
FFFFFFFFFFFFFFFFFFFFFFFFFFFFFFFFFFFFFFFFFFFFFFFFFFFFFFFFFFFFFFFFFFFFFFFFFFFFF  
FFFFFFFFFFFFFFFFFFFFFFFFFFFFFFFFFFFFFFFFFFFFFFFFFFFFFFFFFFFFFFFFFFFFFFFFFFFFF  
@A00155:342:HHGFNDSXY:1:1604:26241:18129 2:N:0:GAACCTAG+TCCGCATA  
TAGGTCGTGAACAAGCCCCGGAGTACATCTCCTTTGGAAGTAGGAGACCCCTCCGGTCTTGTC AACCT  
CTGTTTCGGCAGAGGATACCGTGCTCCACAGCTGTAAGGCTGTGGGCCCGAGAGAAGTCGCTCTCTCT  
+  
FFFFFFFFFFFFFFFFFFFFFFFFFFFFFFFFFFFFFFFFFFFFFFFFFFFFFFFFFFFFFFFFFFFFFFFFFFFFF  
FFFFFFFFFFFFFFFFFFFFFFFFFFFFFFFFFFFFFFFFFFFFFFFFFFFFFFFFFFFFFFFFFFFFFFFFFFFFF  
@A00155:342:HHGFNDSXY:1:1604:17137:21214 2:N:0:GAACCTAG+TCCGCATA  
TAGACTACGACTTACACGGTAGGTCGTGAACAAGCCCCGGAGTACATCTCCTTTGGAACCAGGAGACCC  
CTCCGGTCTTGTC AACCTCTGTTTCGGCAGAGGATACCGTGCTCCACAGCTGTAAGGCTGTGGGCC

@A00155:342:HHGFNDSXY:1:1605:15944:18239 2:N:0:GAACCTAG+TCCGCATA  
GGACTCGTCAGGTAGCCTACTAGACTACGACTTACACGGTAGGTCGTGAACAAGCCCGGAGTACATCT  
CCTTTGGAACCAGGAGACCCCTCCGGTCTTGTTCAACCTCTGTTTCGGCAGAGGATACCGTGCTCCAC  
+  
FFFFFFFFFFFFFFFFFFFFFFFFFFFFFFFFFFFFFFFFFFFFFFFFFFFFFFFFFFFFF:FFFFFFFFFFFFFFFFFFFFFFFFFFFFFFFFFFFFF  
FFFFFFFFFFFFFFFFFFFFFFFFFFFFFFFFFFFFFFFFFFFFFFFFFFFFFFFFFFFFFFFFF:FFFFFFFFFFFFFFF  
@A00155:342:HHGFNDSXY:1:1606:30418:11772 2:N:0:GAACCTAG+TCCGCATA  
GTACATCTCCTTTGGAAGTGGAGACCCCTCCGGTCTTGTTCAACCTCTGTTTCGGCAGAGGATACCG  
TGCTCCACAGCTGTAAGGCTGTGGGCCCGAGAGAAGTCGCTCTCTCTCGCCCTCTACATCCCTCTCGG  
+  
FFFFF:FFFFFFFFFFFFF:FFFFFFFFFFFFFFFFFFFFFFFFFFFFFFFFFFFFFFFFFFFFF:FFFFFFFFFFFFF:,FFF  
FFFFFFFFFFFFFFFFFFFFFFFFFFFFFFFFFFFFFFFFFFFFFFFFFFFFFFFFFFFFFFFFF:FFFFFFFFFFFFFFF  
@A00155:342:HHGFNDSXY:1:1606:15591:24486 2:N:0:GAACCTAG+TCCGCATA  
TCTCCTTTGGAAGTGGAGACCCCTCCGGTCTTGTTCAACCTCTGTTTCGGCAGAGGATACCGTGCTC  
CACAGCTGTAAGGCTGTGGGCCCGAGAGAAGTCGCTCTCTCTCGCCCTCCACATCCCTCTCGGCATTG  
+  
FFFFF:FFFFFFFFFFFFFFFFFFFFFFFFFFFFFFFFFFFFFFFFFFFFFFFFFFFFFFFFFFFFF  
FFFFFFFFFFFFFFFFFFFFFFFFFFFFFFFFFFFFFFFFFFFFFFFFFFFFFFFFFFFFFFFFF:FFFFFFFFFFFFF,FF  
@A00155:342:HHGFNDSXY:1:1607:20175:13510 2:N:0:GAACCTAG+TCCGCATA  
AAGGACGAAACCGTCGTTACTTTTTGAGTTGTGTAAGTTTCGTCCTAAAAAGGACTCGTCAGGTAGCC  
TACTAGACTACGACTTACACGGTAGGTCGTGAACAAGCCCGGAGTACATCTCCTTTGGAAGTGGAGAG  
+  
FFFFFFFFFFFFFFFFFFFFFFFFFFFFFFFFFFFFFFFFFFFFFFFFFFFFFFFFFFFFFFFFF:FFFFFFFFFFFFFFFFFFFFF  
:FFFFFFFFFFFFFFFFFFFFFFFFFFFFFFFFFFFFFFFFFFFFFFFFFFFFFFFFFFFFFFFFF:FFFF:FFFFFFFFF  
@A00155:342:HHGFNDSXY:1:1607:27787:22122 2:N:0:GAACCTAG+TCCGCATA  
GAACTAGGAGACCCCTCCGGTCTTGTTCAACCTCTGTTTCGGCAGAGGATACCGTGCTCCACAGCTGT  
AAGGCTGTGGGCCCGAGAGAAGTCGCTCTCTCTCGCCCTCCACATCCCTCTCGGCATTGAG  
+  
FFFF,FFFFFFFFFFFFFFFFFFFFFFFFFFFFFFFFFFFFFFFFFFFFFFFFFFFFFFFFFFFFF  
FFFFFFFFFFFFFFFFFFFFFFFFFFFFFFFFFFFFFFFFFFFFFFFFFFFFFFFFFFFFFFFFF  
@A00155:342:HHGFNDSXY:1:1607:13123:23124 2:N:0:GAACCTAG+TCCGCATA  
GGTAGCCTACTAGACTACGACTTACACGGTAGGTCGTGAACAAGTCCGGAGTACATCTCCTTTGGAAC  
TAGGAGACCCCTCCGGTCTTGTTCAACCTCTGTTTCGGCAGAGGATACCGTGCTCCACAGCTGTAAGG  
+  
FFFFFFFFFFFFFFFFFFFFFFFFFFFFFFFFFFFFFFFFFFFFFFFFFFFFFFFFFFFFFFFFF:FFFFFFFFFFFFFFFFFFFFF  
FFFFFFFFFFFFFFFFFFFFFFFFFFFFFFFFFFFFFFFFFFFFFFFFFFFFFFFFFFFFFFFFF:FFFFFFFFFFFFFFFFFFFFF  
@A00155:342:HHGFNDSXY:1:1607:23411:27508 2:N:0:GAACCTAG+TCCGCATA  
TGGAAGTGGAGACCCCTCCGGTCTTGTTCAACCTCTGTTTCGGCAGAGGATACCGTGCTCCACAGCT  
GTAAGGCTGTGGGCCCGAGAGAAGTCGCTCTCTCTCGCCCTCCACATCCCTCTCGGCAGTGAGATGAC  
+  
FF:FFFFFFFFFFFFF:FFFFFFFFFFFFF:FFFF:FFFF:FFFFFFFFFFFFFFFFFFFFFFFFFFFFF,  
FFFFFFFFF:FFFFFFFFFFFFF:F:FFFFFFFFF:FFFFFFFFFFFFFFFFFFFFFFFFFFFFF:,FFF,FFFF  
@A00155:342:HHGFNDSXY:1:1607:21124:36793 2:N:0:GAACCTAG+TCCGCATA  
GAAACCGTCGTTACTCTACGAGTTGTGTAAGTTTCGTCCTAAAAAGGACTCGTCAGGTAGCCTACTAG  
ACTACGACTTACACGGTAGGTCGTGAACAAGCCCGGAGTACATCTCCTTTGGAAGTGGAGACCCCTC  
+  
FFFFFFFFFFFFF,FFFFF:FFFFFFFFF,FFFF:FFFFF:FFFF,FFFFFFFFFFFFFFFFFFFFF,FFFFF  
FFFFFFFFFFFFFFFFFFFFFFFFFFFFFFFFFFFFFFFFFFFFFFFFFFFFFFFFFFFFFFFFF:FFFFFFFFF  
@A00155:342:HHGFNDSXY:1:1608:17716:5400 2:N:0:GAACCTAG+TCCGCATA  
CCGTGCTTACTCTTCGAGTTGTGTAAGTTTCGTCCTAAAAAGGACTCGTCAGGTAGCCTACTAGACTA  
CGACTTACACGGTAGGTCGTGAACAAGCCCGGAGTACATCTCCTTTGGAAGTGGAGACCCCTCCGGT  
+  
FFFFFFFFF:FFFFFFFFFFFFFFFFFFFFFFFFFFFFFFFFFFFFFFFFFFFFFFFFFFFFFFFFFFFFF  
FFFFFFFFFFFFFFFFFFFFF,FFFFFFFFFFFFFFFFFFFFFFFFFFFFFFFFFFFFFFFFFFFFFFFFFFFFF

@A00155:342:HHGFNDSXY:1:1608:25364:11537 2:N:0:GAACCTAG+TCCGCATA  
AGGACGAAACCGTCGTTACTCTTGGAGTTGTGTAAGTTTCGTCCTAAAAAGGACTCGTCAGGTAGCCT  
ACTAGACTACGACTTACACGGTAGGTCGTGAACAAGCCCGGAGTACATCTCCTTTGGAAGTAGGAGAC  
+  
F:F:FFFFFF:FFFFFFF::F,F,FFFFFFFF:FFFFFFFFFFFF,FF:,F:FFFF:FFF:FFFFFFF  
FFFFFFFFFFFF,FFFFFFFFFFFFFFFFFFFF:FFFFFFFFFFFFFFFF:FFFFFF,FFFFFF:FF,F,FF  
@A00155:342:HHGFNDSXY:1:1608:31078:14544 2:N:0:GAACCTAG+TCCGCATA  
ACTAGACTACGACTTACACGGTAGGTCGTGAACAAGCCCGGAGTACATCTCCTTTGGAACCAGGAGAC  
CCCTCCGGTCTTGTCCAACCTCTGTTTCGGCAGAGGATACCGTGCTCCACAGCTGTAAGGCTGTGGGC  
+  
FFFFFFFFFFFFFF:FFFFFFFFFFFFFFFFFFFFFFFFFFFFFFFFFFFFFFFFFFFFFFFFFFFFFFFFFFFF  
FFFFFFFFFFFF:FFFFFFFFFFFFFFFFFFFF:FFFFFFFFFFFFFFFFFFFFFFFFFFFFFFFFFFFF:FFFFF  
@A00155:342:HHGFNDSXY:1:1608:32217:27383 2:N:0:GAACCTAG+TCCGCATA  
TTCGTCTTGGAACGGACTCATCAGGGAGCCTACTAGACTCCGACCGTCATGGGGGTTCAAACCCATG  
CCCCACCACACCGCCTTAGATCAGCTGTGTCCACTTAAGGACTCACCTCTGCCTATGGTCATCTCAA  
+  
F:FFFFFFFFFFFFFFFFFFFF,FFFFFFFFFFFFFFFFFFFFFFFFFFFFFFFFFFFFFFFFFFFFFFFFFFFF  
FFFFFFFFFFFFFFFFFFFFFFFFFFFFFFFFFFFFFFFFFFFFFFFFFFFFFFFFFFFFFFFFFFFF:FFFFF  
@A00155:342:HHGFNDSXY:1:1608:27154:32518 2:N:0:GAACCTAG+TCCGCATA  
AGCCCGGAGTACATCTCCTTTGGAAGTAGGAGACCCCTCCGGTCTTGTCCAACCTCTGTTTCGGCAGA  
GGATACCGTGCTCCACAGCTGTAAGGCTGTGGGCCCGAGAGAAGTCGCTCTCTCTCGCCCTCCACATC  
+  
FFFFFFFFFFFFFFFFFFFF,FFFFFFFFFFFFFFFFFFFFFFFFFFFFFFFFFFFFFFFFFFFFFFFFFFFF  
FFFFFFFFFFFFFFFFFFFFFFFFFFFF:FFFFFFFFFFFFFFFFFFFF:FFFFFFFFFFFFFFFFFFFFFFFF  
@A00155:342:HHGFNDSXY:1:1609:19443:2973 2:N:0:GAACCTAG+TCCGCATA  
AAGTTTCGTCCTAAAAAGGACTCGTCAGGTAGCCTACTAGACTACGACTTACACGGTAGGTCGTGAAC  
AAGCCCGGAGTACATCTCCTTTGGAAGTAGGAGACCCCTCCGGTCTTGTCCAACCTCTGTTTCGGCAG  
+  
FFFFFFFFFFFFFFFFFFFFFFFFFFFF:FFFFFF:FFFFFFFFFFFFFFFFFFFFFFFFFFFF:FF:FFFFFFFF  
FFFFFFFFFFFFFFFFFFFF:FFFFFFFF:FFFFFFFFFFFF:FFFFFFFFFFFF:FFF:FFFFFFFFFFFFFFFF  
@A00155:342:HHGFNDSXY:1:1609:26992:18302 2:N:0:GAACCTAG+TCCGCATA  
TAGGAGACCCCTCCGGTCTTGTCCAACCTCTGTTTCGGCAGAGGATACCGTGCTCCACAGCTGTAAGG  
CTGTGGGCCCGAGAGAAGTCGCTCTCTCTCGCCCTCCACATCCCTCTCGGCATTGAGATGACCATAGG  
+  
FFFFFFFFFFFFFFFFFFFFFFFFFFFFFFFFFFFFFFFFFFFFFFFFFFFFFFFFFFFFFFFFFFFFFFFFFFFF  
F:FFFFFFFFFFFF:FFFFFFFFFFFFFFFFFFFFFFFFFFFFFFFFFFFFFFFFFFFFFFFFFFFFFFFFFFFF:F  
@A00155:342:HHGFNDSXY:1:1609:13105:23249 2:N:0:GAACCTAG+TCCGCATA  
CTACTAGACTACGACTTACACGGTAGGTCGTGAACAAGCCCGGAGTACATCTCCTTTGGAAGTAGGAG  
ACCCCTCCGGTCTTGTCCAACCTCTGTTTCGGCAGAGGATACCGTGCTCCACAGCTGTAAGGCTGTGG  
+  
FFFFFFFFFFFFFFFFFFFFFFFFFFFFFFFFFFFFFFFFFFFFFFFFFFFFFFFFFFFFFFFFFFFFFFFFFFFF  
FFFFFFFFFFFFFFFFFFFFFFFFFFFFFFFFFFFFFFFFFFFF:FFFFFFFFFFFFFFFFFFFF,FFFFFFFFFFFF  
@A00155:342:HHGFNDSXY:1:1609:26910:29121 2:N:0:GAACCTAG+TCCGCATA  
TAGACTACGACTTACACGGTAGGTCGTGAACAAGCCCGGAGTACATCTCCTTTGGAAGTAGGAGACCC  
CTCCGGTCTTGTCCAACCTCTGTTTCGGCAGAGGATACCGTGCTCCACAGCTGTAAGGCTGTGGGCC  
+  
FFFFFFFFFFFFFFFFFFFFFFFFFFFFFFFFFFFF:FFFFFFFFFFFFFFFFFFFFFFFFFFFFFFFFFFFF:FFFFFFFFFFFF  
FFFFFFFFFFFFFFFFFFFFFFFFFFFFFFFFFFFFFFFFFFFFFFFFFFFF:FFFFFFFFFFFFFFFF:FFFFFFFFFFFF:F  
@A00155:342:HHGFNDSXY:1:1609:26313:33411 2:N:0:GAACCTAG+TCCGCATA  
GGACTCGTCAGGTAGCCTACTAGACTACGACTTACACGGTAGGTCGTGAACAAGCCCGGAGTACATCT  
CCTTTGGAACCAGGAGACCCCTCCGGTCTTGTCCAACCTCTGTTTCGGCAGAGGATACCGTGCTCCAC



@A00155:342:HHGFNDSXY:1:1609:27326:34162 2:N:0:GAACCTAG+TCCGCATA  
 TAGACTACGACTTACACGGTAGGTCTGTGAACAAGCCCGGAGTACATCTCCTTTGGAAGTACAGAGACCC  
 CTCCGGTCTTGTCCAACCTCTGTTTCGGCAGAGGATACCGTGCTCCACAGCTGTAAGGCTGTGGGCC  
 +  
 FFFFFFFFFFFFFFFFFFFFFFFFFF:FFFFFFFFFFFF,FFFFFFFFFFFF:FFFFFFFFFFFF:FFFFFFFF  
 FFFFFFFFF:FFFFFFFFFFFFFFFFFFFF:FFFFFFFFFFFFFFFFFFFFFFFFFFFFFFFFFFFF:FFFFFFFFFFFF  
 @A00155:342:HHGFNDSXY:1:1609:27263:34240 2:N:0:GAACCTAG+TCCGCATA  
 TAGACTACGACTTACACGGTAGGTCTGTGAACAAGCCCGGAGTACATCTCCTTTGGAAGTACAGAGACCC  
 CTCCGGTCTTGTCCAACCTCTGTTTCGGCAGAGGATACCGTGCTCCACAGCTGTAAGGCTGTGGGCC  
 +  
 FFFFFFFFFFFFFFFFFFFFFFFFFF:FFFF:FFFFFFFFFFFF  
 FFFFFFFFFFFFFFFFFFFFFFFFFF,FFFFFFFFFFFFFFFFFFFFFFFFFFFFFFFFFFFF:FFFFFFFFFFFF  
 @A00155:342:HHGFNDSXY:1:1609:12897:36260 2:N:0:GAACCTAG+TCCGCATA  
 GTGAACAAGCCCGGAGTACATCTCCTTTGGAACCAGGAGACCCCTCCGGTCTTGTCCAACCTCTGTTT  
 CGGCAGAGGATACCGTGCTCCACAGCTGTAAGGCTGTGGGCCCGAGAGAAGTCGCTCTCTCTCGCCCT  
 +  
 FFFFFFFFFFFFFFFFFFFFFFFFFF:FFFFFFFFFFFFFFFFFFFFFFFFFFFFFFFFFFFF:FFFF:FFFFFFFFFFFF  
 FFFFFFFFFFFFFFFFFFFFFFFFFF,FFFFFFFFFFFFFFFFFFFFFFFFFFFFFFFFFFFF:FFFFFFFFFFFF  
 @A00155:342:HHGFNDSXY:1:1609:12807:36385 2:N:0:GAACCTAG+TCCGCATA  
 GTGAACAAGCCCGGAGTACATCTCCTTTGGAACCAGGAGACCCCTCCGGTCTTGTCCAACCTCTGTTT  
 CGGCAGAGGATACCGTGCTCCACAGCTGTAAGGCTGTGGGCCCGAGAGAAGTCGCTCTCTCTCGCCCT  
 +  
 FFFFFFFF,FFFFFFFFFFFFFFFFFFFFFFFF:FFFFFFFFFFFFFFFFFFFFFFFFFFFFFFFFFFFF:FFFF  
 FFFFFFFFF:FFFFFFFFFFFFFFFFFFFF:FFFFFFFFFFFFFFFFFFFFFFFFFFFFFFFFFFFF:FFFFFFFF  
 @A00155:342:HHGFNDSXY:1:1610:26657:6261 2:N:0:GAACCTAG+TCCGCATA  
 TCCGTTCCAAGGACGAAACCGTCGTTACTCTTTGAGTTGTGTAAGTTTCGTCCTAAAAGGACTCGTC  
 AGGTAGCCTACTAGACTACGACTTACACGGTAGGTCTGTGAACAAGCCCGGAGTACATCTCCTTTGAA  
 +  
 FFFFFFFFFFFFF:FFFFFFFFFFFFFFFFFFFFFFFFFFFFFFFFFFFFFFFFFFFFFFFFFFFF,FFFFFFFF  
 FFFFF:FFFFFFFFFFFFFFFFFFFFFFFFFFFFFFFFFFFFFFFFFFFFFFFFFFFF:FFFFFFFFFFFFFFFFFFFF:  
 @A00155:342:HHGFNDSXY:1:1610:15049:28776 2:N:0:GAACCTAG+TCCGCATA  
 TCGAAGAGTAACGACGTTTCGTCCTTGAACGGACTCATCAGGGAGCCTACTAGACTCCGACCGTCA  
 TGGGGGTTCAAACCCATGCCCGCCACACCGCCTTAGATCAGCTGTGTCCACTTAAGGACTCACCTCT  
 +  
 FFFFFFFFFFFFFFFFFFFFFFFFFF:FFFFFFFFFFFFFFFFFFFFFFFFFFFFFFFFFFFF:FFFFFFFFFFFF  
 FFFFFFFFFF,FFFFFFFFFFFFFFFFFFFFFFFFFFFFFFFFFFFF:FFFFFFFFFFFFFFFFFFFFFFFFFFFF  
 @A00155:342:HHGFNDSXY:1:1610:14380:35070 2:N:0:GAACCTAG+TCCGCATA  
 GAGACCCCTCCGGTCTTGTCCAACCTCTGTTTCGGCAGAGGATACCGTGCTCCACAGCTGTAAGGCTG  
 TGGGCCCGAGAGAAGTCGCTCTCTCTCGCCCTCTACATCCCTCTCGGCATTGAGATGACCATAGGCCA  
 +  
 FFFFFFFFFFFFFFFFFFFFFFFFFF,FFFFFFFFFFFFFFFFFFFFFFFFFFFFFFFF,FFFF  
 FFFFFFFFFFFFFFFFFFFFFFFFFF,FFFFFFFFFFFFFFFFFFFFFFFFFFFFFFFFFFFFFFFFFFFF  
 @A00155:342:HHGFNDSXY:1:1610:32461:35947 2:N:0:GAACCTAG+TCCGCATA  
 AGCCTACTAGACTACGACTTACACGGTAGGTCTGTGAACAAGCCCGGAGTACATCTCCTTTGGAAGTAC  
 GAGACCCCTCCGGTCTTGTCCAACCTCTGTTTCGGCAGAGGATACCGTGCTCCACAGCTGTAAGGCTG  
 +  
 FFFFFFFFFFFFFFFFFFFFF:FFFFFFFFFFFFFFFFFFFFFFFFFFFFFFFFFFFFFFFFFFFFFFFFFFFF  
 FFFFF:FFFFFFFFFFFFFFFFFFFFFFFFFFFFFFFFFFFFFFFFFFFF:FFFFFFFFFFFFFFFFFFFF:FF:FFF  
 @A00155:342:HHGFNDSXY:1:1611:15727:10504 2:N:0:GAACCTAG+TCCGCATA  
 TAGACTACGACTTACACGGTAGGTCTGTGAACAAGCCCGGAGTACATCTCCTTTGGAAGTACAGACCC  
 CTCCGGTCTTGTCCAACCTCTGTTTCGGCAGAGGATACCGTGCTCCACAGCTGTAAGGCTGTGGGCC  
 +  
 FFFFFFFFFFFFFFFFFFFFFFFFFF:FFFFFFFFFFFFFFFFFFFFFFFFFFFFFFFFFFFF:FFFFFFFFFFFF  
 FFFFFFFFFFFFFFFFFFFFFFFFFF,FFFFFFFFFFFFFFFFFFFFFFFFFFFFFFFFFFFF:FFFFFFFFFFFF

@A00155:342:HHGFNDSXY:1:1611:12418:12383 2:N:0:GAACCTAG+TCCGCATA  
CAGGTAGCCTACTAGACTACGACTTACACGGTAGGTCGTGAACAAGCCCCGAGTACATCTCCTTTGGA  
ACCAGGAGACCCCTCCGGTCTTGTTCCAACCTCTGTTTCGGCAGAGGATACCGTGCTCCACAGCTGTAA  
+  
FFFFFFFFFFFFFFFFFFFFFFFFFFFFFFFFFFFFFFFFFFFFFFFFFFFFFFFFFFFFFFFFFFFFFFFFFFFFF  
FFFF:F:FFFFFFFFFFFFFFFFFFFFFFFFFFFFFFFFFFFFFFFFFFFFFFFFFFFFFFFFFFFFFFFFFFFFF  
@A00155:342:HHGFNDSXY:1:1611:7401:31125 2:N:0:GAACCTAG+TCCGCATA  
TACGACTTACACGGTAGGTCGTGAACAAGCCCCGAGTACATCTCCTTTGGAAGTACGAGACCCCTCCG  
GTCTTGTTCCAACCTCTGTTTCGGCAGAGGATACCGTGCTCCACAGCTGTAAGGCTGTGGGCCCGAGAG  
+  
FFFFFFFFFFFFFFFFFFFF,FF:FFFFFFFFFFFFFFFFFFFFFFFFFFFFFFFFFFFFFFFFFFFFFFFFFFFFF  
FFFF:F:FFFFFFFFFFFFFFFFFFFFFFFFFFFFFFFFFFFFFFFFFFFFFFFFFFFFFFFFFFFFFFFFFFFFF  
@A00155:342:HHGFNDSXY:1:1611:14742:34225 2:N:0:GAACCTAG+TCCGCATA  
GTGAACAAGCCCCGAGTACATCTCCTTTGGAAGTACGAGACCCCTCCGGTCTTGTTCCAACCTCTGTTT  
CGGCAGAGGATACCGTGCTCCACAGCTGTAAGGCTGTGGGCCCGAGAGAAGTCGCTCTCTCTCGCCCT  
+  
FFFFFFFFFFFFFFFFFFFFFFFFFFFFFFFFFFFFFFFFFFFFFFFFFFFFFFFFFFFFFFFFFFFFFFFFFFFFF  
FFFF:FFFFFFFFFFFFFFFFFFFFFFFFFFFFFFFFFFFFFFFFFFFFFFFFFFFFFFFFFFFFFFFFFFFFF  
@A00155:342:HHGFNDSXY:1:1612:29387:34663 2:N:0:GAACCTAG+TCCGCATA  
CAGGTAGCCTACTAGACTACGACTTACACGGTAGGTCGTGAACAAGCCCCGAGTACATCTCCTTTGGA  
ACTAGGAGACCCCTCCGGTCTTGTTCCAACCTCTGTTTCGGCAGAGGATACCGTGCTCCACAGCTGTAA  
+  
FFFFFFFFFFFFFFFFFFFFFFFFFFFFFFFFFFFFFFFFFFFFFFFFFFFFFFFFFFFFFFFFFFFFFFFFFFFFF  
FFFFFFFFFFFFFFFFFFFFFFFFFFFFFFFFFFFFFFFFFFFFFFFFFFFFFFFFFFFFFFFFFFFFFFFFFFFFF  
@A00155:342:HHGFNDSXY:1:1612:22064:35227 2:N:0:GAACCTAG+TCCGCATA  
GTGAACAAGCCCCGAGTACATCTCCTTTGGAAGTACGAGACCCCTCCGGTCTTGTTCCAACCTCTGTTT  
CGGCAGAGGATACCGTGCTCCACAGCGGTAAGGCTGTGGGCCCGAGAGAAGTCGCTCTCTCTCGCCC  
+  
FFFFFFF,:FFFFFFFFFFFFFFFFFFFF,FFFFFFFFFFFFFFFFFFFFFFFFFFFFFFFF:F:FFFFFFFFFFFFF:FF  
FFFFFFFFFFFFFFFFFFFFFFFFFFFF,FF,FFFFFFFFFFFFFFFFFFFFFFFFFFFF,:FFFFFFFFFFFFF  
@A00155:342:HHGFNDSXY:1:1612:15022:36652 2:N:0:GAACCTAG+TCCGCATA  
CAGGTAGCCTACTAGACTACGACTTACACGGTAGGTCGTGAACAAGCCCCGAGTACATCTCCTTTGGA  
ACTAGGAGACCCCTCCGGTCTTGTTCCAACCTCTGTTTCGGCAGAGGATACCGTGCTCCACAGCTGTAA  
+  
FFFFFFFFFFFFFFFFFFFFFFFFFFFFFFFFFFFFFFFFFFFFFFFFFFFFFFFFFFFFFFFFFFFFFFFFFFFFF  
FFFFFFFFFFFFFFFFFFFFFFFFFFFFFFFFFFFFFFFFFFFFFFFFFFFFFFFFFFFFFFFFFFFFFFFFFFFFF  
@A00155:342:HHGFNDSXY:1:1612:17888:36918 2:N:0:GAACCTAG+TCCGCATA  
GTGAACAAGCCCCGAGTACATCTCCTTTGGAAGTACGAGACCCCTCCGGTCTTGTTCCAACCTCTGTTT  
CGGCAGAGGATACCGTGCTCCACAGCTGTAAGGCTGTGGGCCCGAGAGAAGTCGCTCTCTCTCGCCC  
+  
FFFFFFFFFFFFFFFFFFFFFFFFFFFFFFFFFFFF,FFFFFFFFFFFFFFFFFFFFFFFFFFFFFFFFFFFF,FFFFFFFFFFFFF  
FFFF:FFFFFFFFFFFFFFFFFFFFFFFFFFFFFFFFFFFFFFFFFFFFFFFFFFFFFFFFFFFFFFFFFFFFF  
@A00155:342:HHGFNDSXY:1:1613:11767:5149 2:N:0:GAACCTAG+TCCGCATA  
GAGACCCCTCCGGTCTTGTTCCAACCTCTGTTTCGGCAGAGGATACCGTGCTCCACAGCTGTAAGGCTG  
TGGGCCCGAGAGAAGTCGCTCTCTCTCGCCCTCCACATCCCTCTCGGCATTGAGATGACCATAGGCCA  
+  
FFFFFFFFFFFFFFFFFFFFFFFFFFFFFFFFFFFFFFFFFFFFFFFFFFFFFFFFFFFFFFFFFFFFFFFFFFFFF  
FFFFFFFFF:FFFF:FFFFFFFFFFFFFFFFFFFFFFFFFFFFFFFFFFFFFFFFFFFFFFFFFFFFFFFFFFFFF:  
@A00155:342:HHGFNDSXY:1:1613:24334:21277 2:N:0:GAACCTAG+TCCGCATA  
TACTCTTCGAGTTGTGTAAGTTTCGTCCTAAAAAGGACTCGTCAGGTAGCCTACTAGACTACGACTTA  
CACGGTAGGTCGTGAACAAGCCCCGAGTACATCTCCTTTGGAAGTACGAGACCCCTCCGGTCTTGTTCC  
+  
FFFFFFFFFFFFFFFFFFFFFFFFFFFFFFFFFFFFFFFFFFFFFFFFFFFFFFFFFFFFFFFFFFFFFFFFFFFFF  
FFFFFFFFFFFFFFFFFFFFFFFFFFFFFFFFFFFFFFFFFFFFFFFFFFFFFFFFFFFFFFFFFFFFFFFFFFFFF:  
@A00155:342:HHGFNDSXY:1:1613:24334:21277 2:N:0:GAACCTAG+TCCGCATA  
TACTCTTCGAGTTGTGTAAGTTTCGTCCTAAAAAGGACTCGTCAGGTAGCCTACTAGACTACGACTTA  
CACGGTAGGTCGTGAACAAGCCCCGAGTACATCTCCTTTGGAAGTACGAGACCCCTCCGGTCTTGTTCC

@A00155:342:HHGFNDSXY:1:1613:10013:24251 2:N:0:GAACCTAG+TCCGCATA  
AACTAGGAGACCCCTCCGGTCTTGTC AACCTCTGTTTCGGCAGAGGATACCGTGCTCCACAGCTGT  
AGGCTGTGGGCCCGAGAGAAGTCGCTCTCTCTCGCCCTCTACATCCCTCTCGGCATTGAGATGACCA  
+  
FFFFF:FFFFFFFFFFFFFFFFFFFFFFFFFFFFFFFFFFFFFFFFFFFFFFFFFFFFFFFFFFFFFFFFFFFFFFF  
FFFFFFFFFFFFFFFFFFFFFFFFFFFFFFFFFFFFFFFFFFFFFFFFFFFFFFFFFFFFFFFFFFFFFFFFFFFF:  
@A00155:342:HHGFNDSXY:1:1613:12988:29246 2:N:0:GAACCTAG+TCCGCATA  
GGACTCGTCAGGTAGCCTACTAGACTACGACTTACACGGTAGGTCTGTGAACAAGCCCCGGAGTACATCT  
CCTTTGGA ACTAGGAGACCCCTCCGGTCTTGTC AACCTCTGTTTCGGCAGAGGATACCGTGCTCCAC  
+  
FFFFFFFFFFFFFFFFFFFFFFFFFFFFFFFFFFFFFFFFFFFFFFFFFFFFFFFFFFFFFFFFFFFFFFFFFFFF  
FFFFFFFFFFFFFFFFFFFFFFFFFFFFFFFFFFFFFFFFFFFFFFFFFFFFFFFFFFFFFFFFFFFFFFFFFFFF:  
@A00155:342:HHGFNDSXY:1:1614:4788:14418 2:N:0:GAACCTAG+TCCGCATA  
CACGACCTACCGTGTAAG  
+  
FFFFFFFFFFFFFFFFFFFF  
@A00155:342:HHGFNDSXY:1:1614:14796:30968 2:N:0:GAACCTAG+TCCGCATA  
TACACGGTAGGTCTGTGAACAAGCCCCGGAGTACATCTCCTTTGGA ACTAGGAGACCCCTCCGGTCTTG  
CCAACCTCTGTTTCGGCAGAGGATACCGTGCTCCACAGCTGTAAGGCTGTGGGCCCGAGAGAAGTCG  
+  
FFFFFFFFFFFFFFFFFFFFFFFFFFFFFFFFFFFFFFFFFFFFFFFFFFFFFFFFFFFFFFFFFFFFFFFFFFFF  
FFFFFFFFFFFFFFFFFFFFFFFFFFFFFFFFFFFFFFFFFFFFFFFFFFFFFFFFFFFFFFFFFFFFFFFFFFFF:  
@A00155:342:HHGFNDSXY:1:1614:21043:32174 2:N:0:GAACCTAG+TCCGCATA  
AAAAGGACTCGTCAGGTAGCCTACTAGACTACGACTTACACGGTAGGTCTGTGAACAAGCCCCGGAGTAC  
ATCTCCTTTGGA ACTAGGAGACCCCTCCGGTCTTGTC AACCTCTGTTTCGGCAGAGGATACCGTGCT  
+  
FFFFFFFFFFFFFFFFFFFFFFFFFFFFFFFFFFFFFFFFFFFFFFFFFFFFFFFFFFFFFFFFFFFFFFFFFFFF:  
FFFFFFFFFFFFFFFFFFFFFFFFFFFFFFFFFFFFFFFFFFFFFFFFFFFFFFFFFFFFFFFFFFFFFFFFFFFF:  
@A00155:342:HHGFNDSXY:1:1615:22923:14105 2:N:0:GAACCTAG+TCCGCATA  
GGACTCGTCAGGTAGCCTACTAGACTACGACTTACACGGTAGGTCTGTGAACAAGCCCCGGAGTACATCT  
CCTTTGGA ACTAGGAGACCCCTCCGGTCTTGTC AACCTCTGTTTCGGCAGAGGATACCGTGCTCCAC  
+  
FFFFFFFFFFFFFFF:FFFFFFFFFFFFFFFFFFFFFFFFFFFFFFFFFFFFFFFFFFFFFFFFFFFFFFFFFFFF  
FFFFFFFFFFFFFFFFFFFFFFFFFFFFFFFFFFFFFFFFFFFFFFFFFFFFFFFFFFFFFFFFFFFFFFFFFFFF:  
@A00155:342:HHGFNDSXY:1:1615:18918:30060 2:N:0:GAACCTAG+TCCGCATA  
GGACTCGTCAGGTAGCCTACTAGACTACGACTTACACGGTAGGTCTGTGAACAAGCCCCGGAGTACATCT  
CCTTTGGA ACCAGGAGACCCCTCCGGTCTTGTC AACCTCTGTTTCGGCAGAGGATACCGTGCTCCAC  
+  
:FFF:FFF,FFF:FFFFFFFFFFFFFF:F:FFFFFFFF:,FFFFFFFFFFFFFFFFFFFFFFFF:FFFFFFFF  
FFFFFFFF:F::FFFFFFFF:FF:FFFFFFFF:FFF::FFF,FFF,FFFFFFFFFFFFFFFF:>::FFFF:  
@A00155:342:HHGFNDSXY:1:1616:9299:25488 2:N:0:GAACCTAG+TCCGCATA  
AGCCCCGGAGTACATCTCCTTTGGA ACTAGGAGACCCCTCCGGTCTTGTC AACCTCTGTTTCGGCAGA  
GGATACCGTGCTCCACAGCTGTAAGGCTGTGGGCCCGAGAGAAGTCGCTCTCTCTCGCCCTCTACATC  
+  
FFFFFFFFFFFFFFF,FFFFFFFFFFFFFFFFFFFFFFFFFFFFFFFFFFFFFFFFFFFFFFFFFFFFFFFFFFFF:  
FFFFFFFFFFFFFFFFFFFFFFFFFFFFFFFFFFFFFFFFFFFFFFFFFFFFFFFFFFFFFFFFFFFFFFFFFFFF:  
@A00155:342:HHGFNDSXY:1:1616:20039:27586 2:N:0:GAACCTAG+TCCGCATA  
TAGGACGAACTTACACA AACTCGAAGAGTAACGACGGTTTTCTGCTCTTGGAACGGACTCATCAGGGAGC  
CTACTAGACTCCGACCGTCATGGGGGTTCAAACCCATGCCCGCTACACCGCCTTAGATCAGCTGTGT  
+  
FFFFFFFFFFFFFFFFFFFFFFFFFFFFFFFFFFFFFFFFFFFFFFFFFFFFFFFFFFFFFFFFFFFFFFFFFFFF  
FFFFF,FFFFFFFFFFFFFFFFFFFFFFFFFFFFFFFFFFFFFFFFFFFFFFFFFFFFFFFFFFFFFFFFFFFF  
@A00155:342:HHGFNDSXY:1:1616:28339:30217 2:N:0:GAACCTAG+TCCGCATA  
TCTTGTC AACCTCTGTTTCGGCAGAGGATACCGTGCTCCACAGCTGTAAGGCTGTGGGCCCGAGAGA

AGTCGCTCTCTCGCCCTCCACATCCCTCTCGGCATTGAGATGACCATAGGCCAGAGGAGAGTCTCT  
+  
F:FFFFFFFFFFFFFFFFFFFF, :FFFFFFFFFFFFFFFFFFFFFFFFFFFFFFFFFFFFFFFFFFFFFFF:FFFFFFFFFFFFFFFFFFFF  
FFFFFFFFFFFFFFFFFFFFFFFF:FFFFFFFFFFFFFFFFFFFFFFFFFFFFFFFFFFFFFFFFFFFFFFFF:FFFFFFFFFFFFFFFFFFFF  
@A00155:342:HHGFNDSXY:1:1617:30156:12164 2:N:0:GAACCTAG+TCCGCATA  
ACATCTCCTTTGGAAGTAGGAGACCCCTCCGGTCTTGTTCCAACCTCTGTTTCGGCAGAGGATAACCGTG  
CTCCACAGCTGTAAGGCTGTGGGCCCGAGAGAAGTCGCTCTCTCTCGCCCTCTACATCCCTCTCGGC  
+  
FFFFFFFFFFFFFFFFFFFFFFFFFFFFFFFFFFFFFFFFFFFFFFFFFFFFFFFFFFFFFFFFFFFFFFFFFFFF  
FFFFFFF:FFFF:FFFFFFFFFFFFFFFFFFFFFFFF,F:FFFFFFFFFFFFFFFFFFFFFFFFFFFFFFFFFFFF  
@A00155:342:HHGFNDSXY:1:1619:10366:7232 2:N:0:GAACCTAG+TCCGCATA  
GACCCCTCCGGTCTTGTTCCAACCTCTGTTTCGGCAGAGGATAACCGTGCTCCACAGCTGTAAGGCTGTG  
GGCCCCGAGAGAAGTCGCTCTCTCTCGCCCTCCACATCCCTCTCGGCATTGAGATGACCATAG  
+  
FFFFFFFFFFFFFFFFFFFFFFFFFFFFFFFFFFFFFFFFFFFFFFFFFFFFFFFFFFFFFFFFFFFFFFFFFFFF  
FFFFFFFFFFFFFFF:FFFFFFFFFFFFFFFFFFFFFFFFFFFFFFFFFFFFFFFFFFFFFFFFFFFFFFFFFF:FF,FF  
@A00155:342:HHGFNDSXY:1:1619:10239:7326 2:N:0:GAACCTAG+TCCGCATA  
GACCCCTCCGGTCTTGTTCCAACCTCTGTTTCGGCAGAGGATAACCGTGCTCCACAGCTGTAAGGCTGTG  
GGCCCCGAGAGAAGTCGCTCTCTCTCGCCCTCCACATCCCTCTCGGCATTGAGATGACCATAG  
+  
FFFFFFFFFFFFFFF:FFFFFFFFFFFFFFFFFFFFFFFFFFFFFFFFFFFFFFFFFFFFFFFFFFFFFFFFFFFF  
FFFFFFFFFFFFFFFFFFFFFFFFFFFFFFFFFFFFFFFFFFFFFFFFFFFFFFFFFFFFFFFFFFFF, FFFFFF  
@A00155:342:HHGFNDSXY:1:1619:12735:12680 2:N:0:GAACCTAG+TCCGCATA  
AGCCCGGAGTACATCTCCTTTGGAAGTAGGAGACCCCTCCGGTCTTGTTCCAACCTCTGTTTCGGCAGA  
GGATAACCGTGCTCCACAGCTGTAAGGCTGTGGGCCCGAGAGAAGTCGCTCTCTCTCGCCCTCC  
+  
FFFFFFFFFFFFFFFFFFFFFFF:FFFFFFFFF:FFFFFFFFFFFFFFFFFFFFFFFFF:FFFFFFFFFFFFFFFFFFFFFFF  
FFFF:FFFFFFFFFFFFFFFFFFFFFFF, FFFFFFFFFFFFFFFFFFFFFFFF, FFFFFFFFFFFFFFFFFFFFFFFF  
@A00155:342:HHGFNDSXY:1:1620:8929:3458 2:N:0:GAACCTAG+TCCGCATA  
GGAGTACATCTCCTTTGGAAGTAGGAGACCCCTCCGGTCTTGTTCCAACCTCTGTTTCGGCAGAGGATA  
CCGTGCTCCACAGCTGTAAGGCTGTGGGCCCGAGAGAAGTCGCTCTCTCTCGCCCTCCACATCCCTCT  
+  
FFFFFFFFFFFFFFFFFFFFFFFFFFFFFFFFFFFFFFFFFFFFFFFFFFFFFFFFFFFFFFFFFFFFFFFFFFFF  
FFFFFFFFFFFFFFFFFFFFFFFFFFFFFFFFFFFFFFFFFFFFFFFFFFFFFFFFFFFFFFFFFFFFFFFFFFFF  
@A00155:342:HHGFNDSXY:1:1620:31177:21574 2:N:0:GAACCTAG+TCCGCATA  
TACATCTCCTTTGGAAGTAGGAGACCCCTCCGGTCTTGTTCCAACCTCTGTTTCGGCAGAGGATAACCGT  
GCTCCACAGCTGTAAGGCTGTGGGCCCGAGAGAAGTCGCTCTCTCTCGCCCTCCACATCCCTCTCGGC  
+  
FFFFFFFFFFFFFFFFFFFFF:FFFFFFFFFFFFFFFFFFFFFFFFFFFFFFFFFFFFFFFFFFFFFFFFFFFFFF:  
FFFFFFFFFFFFFFFFFFFFFFFFFFFFFFFFFFFFFFFFFFFFFFFFFFFFFFFFFFFFFFFFFFFF:FFFFFFF:FFFFF:F  
@A00155:342:HHGFNDSXY:1:1620:15157:22451 2:N:0:GAACCTAG+TCCGCATA  
GACGAAACCGTCTTACTCTTCGAGTTGTGTAAGTTTCGTCTAAAAAGGACTCGTCAGGTAGCCTAC  
TAGACTACGACTTACACGGTAGGTCTGAACAAGCCCGGAGTACATCTCCTTTGGAAGTAGGAGACCC  
+  
FFFFFFFFF:FFFFFFFFFFFFFFFFFFFFF:FFFFFFFFF:FFFFFFFFF:F:FFFFFFFFFFFFFFFFFFFF:FFFFF  
FFFFFFFFFFFFFFFFFFFFFFFFFFFFFFFFFFFFFFFFFFFFFFFFFFFFFFFFFFFFFFFFFFFFFFFFFFFF  
@A00155:342:HHGFNDSXY:1:1621:27769:3208 2:N:0:GAACCTAG+TCCGCATA  
GCCCCGAGTACATCTCCTTTGGAAGTAGGAGACCCCTCCGGTCTTGTTCCAACCTCTGTTTCGGCAGAG  
GATAACCGTGCTCCACAGCTGTAAGGCTGTGGGCCCGAGAGAAGTCGCTCTCTCTCGCCCTCCACATCC  
+  
FFFFFFFFFFFFFFF:FFFFFFFFFFFFFFFFFFFFF:FFFFFFFFFFFFFFFFFFFFFFFFFFFF:FF:FFFF:FFFFFFFFF  
FFFFFFFFFFFFFFFFFFFFFFFFFFFFFFFFFFFFFFFFFFFFFFFFFFFFFFFFFFFFFFFFFFFFFFFFFFFF  
@A00155:342:HHGFNDSXY:1:1622:25156:7670 2:N:0:GAACCTAG+TCCGCATA  
ACCTCTGTTTCGGCAGAGGATAACCGTGCTCCACAGCTGTAAGGCTGTGGGCCCGAGAGAAGTCGCTCT

CTCTCGCCCTCCACATCCCTCTCGGCATTGAGATGACCATAGGCCAGAGGAGAGTCTTAAGTGGA  
+  
FFFFFFFFFFFFFFFFFFFFFFFFFFFFFFFFFFFFF:FFFFFFFFFFFF:FFFFFFFFFFFFFFFFFFFFFFFFFFFF,FFFFFFFF  
FFFFFFFFFFFFFFFFFFFFFFFFFFFFFFFFFFFFFFFFFFFFFFFFFFFFFFFFFFFFFFFFFFFFFFFFFFFFFFFFFFFFFFFFFFFFFFFF:  
@A00155:342:HHGFNDSXY:1:1622:18783:30577 2:N:0:GAACCTAG+TCCGCATA  
AAGCCCGGAGTACATCTCCTTTGGAAGTAGGAGACCCCTCCGGTCTTGTCCAACCTCTGTTTCGGCAG  
AGGATACCGTGCTCCACAGCTGTAAGGCTGTGGGCCCGAGAGAAGTCGCTCTCTCTCGCCCTCCACAT  
+  
FFF:F:FFFFFFFFFFFFFFFFFFFFFFFFFFFFFFFFFFFFFFFFFFFFFFFFFFFFFFFFFFFFFFFFFFFFFFFFFFFFFFFFFFFFFFFF:  
FFF:FFFFFFFFFFFF:FFFF:FFF:FFFFFFFFFF:FFFFFFFFFF:FFFFFFFFFFFFFFFFFFFFFFFFFFFFFFFFFFFFFFFF:FFF  
@A00155:342:HHGFNDSXY:1:1622:18747:30859 2:N:0:GAACCTAG+TCCGCATA  
AAGCCCGGAGTACATCTCCTTTGGAAGTAGGAGACCCCTCCGGTCTTGTCCAACCTCTGTTTCGGCAG  
AGGATACCGTGCTCCACAGCTGTAAGGCGGTGGGCCCGAGAGAAGTCGCTCTCTCTCGCCCTCCACAT  
+  
FFFFFFFFFFFFFFFFFFFFFFFFFFFFFFFFFFFFFFFFFFFFFFFFFFFFFFFFFFFFFFFFFFFFFFFFFFFFFFFFFFFFFFFFFFFFF:FFFFFFFFFF,  
FFFFFFFFFFFFFFFFFFFFFFFFFFFFFFFFFFFFFFFFFFFFFFFFFFFFFFFFFFFFFFFFFFFFFFFFFFFFFFFFFFFFFFFFFFFFFFFF:  
@A00155:342:HHGFNDSXY:1:1623:4915:2957 2:N:0:GAACCTAG+TCCGCATA  
AGTACATCTCCTTTGGAAGTAGGAGACCCCTCCGGTCTTGTCCAACCTCTGTTTCGGCAGAGGATACC  
GTGCTCCACAGCTGTAAGGCTGTGGGCCCGAGAGAAGTCGCTCTCTCTCGCCCTCCACATCCCTCTCG  
+  
FFFFFFFFFFFFFFFFFFFFFFFFFFFFFFFFFFFFFFFFFFFFFFFFFFFFFFFFFFFFFFFFFFFFFFFFFFFFFFFFFFFFFFFFFFFFFFFF:FFF  
FFFFFFFFFFFFFFFFFFFFFFFFFFFFFFFFFFFFFFFFFFFFFFFFFFFFFFFFFFFFFFFFFFFFFFFFFFFFFFFFFFFFFFFFFFFFFFFF:FFFFFFFF  
@A00155:342:HHGFNDSXY:1:1623:21504:5290 2:N:0:GAACCTAG+TCCGCATA  
CCGTCGTTACTCTTGAGTTGTGTAAGTTTCGTCCTAAAAAGGACTCGTCAGGTAGCCTACTAGACTA  
CGACTTACACGGTAGGTCGTGAACAAGCCCGGAGTACATCTCCTTTGGAAGTAGGAGACCCCTCCGGT  
+  
FFFFFFF:FFFFFFFFFFFFFFFFFFFF:FFFFFFFFFFFFFFFFFFFFFFFFFFFFFFFFFFFFFFFFFFFFFFFFFFFFFFFFFFFFFFFFFFFFF  
FFFFFFFFFFFFFFFFFFFFFFFFFFFFFFFFFFFFFFFFFFFFFFFFFFFFFFFFFFFFFFFFFFFFFFFFFFFFFFFFFFFFFFFFFFFFFFFF:F,FFFFFFFFF:FFFFFFFF  
@A00155:342:HHGFNDSXY:1:1623:27281:14888 2:N:0:GAACCTAG+TCCGCATA  
CGGCAGAGGATACCGTGCTCCACAGCTGTAAGGCTGTGGGCCCGAGAGAAGTCGCTCTCTCTCGCCCT  
CCACATCCCTCTCGGCATTGAGATGACCATAGGCCAGAGGTGAGTCCTTAAGTGACACAGCTGATCT  
+  
FFFFFFFFFFFFFFFFFFFFFFFFFFFFFFFFFFFFFFFFFFFFFFFFFFFFFFFFFFFFFFFFFFFFFFFFFFFFFFFFFFFFFFFFFFFFF:FFFFFFFFFFFFFFFFFFFF  
FFFFFFFFFFFFFFFFFFFFFFFFFFFFFFFFFFFFFFFFFFFFFFFFFFFFFFFFFFFFFFFFFFFFFFFFFFFFFFFFFFFFFFFFFFFFFFFF:FFFFFFFFFFFFFFFFFFFFF,  
@A00155:342:HHGFNDSXY:1:1623:5159:33974 2:N:0:GAACCTAG+TCCGCATA  
CACGGTAGGTCGTGAACAAGCCCGGAGTACATCTCCTTTGGAAGTAGGAGACCCCTCCGGTCTTGTCC  
AACCTCTGTTTCGGCAGAGGATACCGTGCTCCACAGCTGTAAGGCTGTGGGCCCGAGAGAAGTCGCTC  
+  
FFFFFFFFFFFFFFFFFFFFFFFFFFFFFFFFFFFFFFFFFFFFFFFFFFFFFFFFFFFFFFFFFFFFFFFFFFFFFFFFFFFFFFFFFFFFF,FFFFFFFFFFFFFFFFFFFFF  
FFFFFFFFF:FFFFFFFFFFFFFFFFFFFFFFFFFFFFFFFFFFFFFFFFFFFFFFFFFFFFFFFFFFFFFFFFFFFFFFFFFFFFFFFFFFFFFFFFFFFFFFFF:FFFFFFFFFFFFF  
@A00155:342:HHGFNDSXY:1:1623:2555:35383 2:N:0:GAACCTAG+TCCGCATA  
GGAGTACATCTCCTTTGGAAGTAGGAGACCCCTCCGGTCTTGTCCAACCTCTGTTTCGGCAGAGGATA  
CCGTGCTCCACAGCTGTAAGGCTGTGGGCCCGAGAGAAGTCGCTCTCTCTCGCCCTCCACATCCCTCT  
+  
FFFFFFFFFFFFFFFFFFFFFFFFFFFFFFFFFFFFFFFFFFFFFFFFFFFFFFFFFFFFFFFFFFFFFFFFFFFFFFFFFFFFFFFFFFFFF:FFFFFFFFFFFFF  
FFFFFFFFFFFFFFFFFFFFFFFFFFFFFFFFFFFFFFFFFFFFFFFFFFFFFFFFFFFFFFFFFFFFFFFFFFFFFFFFFFFFFFFFFFFFFFFF:FFFFFFFFFFFFFFFFFFFFF,  
@A00155:342:HHGFNDSXY:1:1624:12472:27633 2:N:0:GAACCTAG+TCCGCATA  
ACATCTCCTTTGGAAGTAGGAGACCCCTCCGGTCTTGTCCAACCTCTGTTTCGGCAGAGGATACCGTG  
CTCCACAGCTGTAAGGCTGTGGGCCCGAGAGAAGTCGCTCTCTCTCGCCCTCCACATCCCTCTCGGCA  
+  
FFFFFFFFFFFFFFFFFFFFFFFFFFFFFFFFFFFFFFFFFFFFFFFFFFFFFFFFFFFFFFFFFFFFFFFFFFFFFFFFFFFFFFFFFFFFF:FFFFFFF  
FFFFFFFFFFFFFFFFFFFFFFFFFFFFFFFFFFFFFFFFFFFFFFFFFFFFFFFFFFFFFFFFFFFFFFFFFFFFFFFFFFFFFFFFFFFFFFFF:FFFFFFFFFFFFFFFFFFFFF,  
@A00155:342:HHGFNDSXY:1:1624:20573:34240 2:N:0:GAACCTAG+TCCGCATA  
CAGCTGTAAGGCTGTGGGCCCGAGAGAAGTCGCTCTCTCTCGCCCTCCACATCCCTCTCGGCATTGAG

ATGACCATAGGCCAGAGGTGAGTTCTTAAGTGGACACAGCTGATCTAAGGCGGTGTGGCGGGGCATGG  
+  
FFFFFFFFFFFFFFFFFFFFFFFFFFFFFFFFFFFFFFFFFFFFFFFFFFFFFFFFFFFFFFFFFFFFFFFF  
FFFFFF:FFFFFF:FFFFFFFFFFFFFFFFFFFFFFFF:FFFFFFFFFFFF,FFFFFFFFFFFFFFFFFFFF  
@A00155:342:HHGFNDSXY:1:1624:21269:37043 2:N:0:GAACCTAG+TCCGCATA  
CAGCTGTAAGGCTGTGGGCCCCGAGAGAAGTCGCTCTCTCTCGCCCTCCACATCCCTCTCGGCATTGAG  
ATGACCATAGGCCAGAGGTGAGTTCTTAAGTGGACACAGCTGATCTAAGGCGGTGTGGCGGGGCATGG  
+  
FFFFFFFFFFFFFFFFFFFFFFFFFFFFFFFFFFFFFFFFFFFFFFFF:FFFFFFFFFFFFFFFFFFFFFFFF  
FFFFFF:FFFFFFFFFFFFFFFFFFFFFFFFFFFFFFFF:FFFFFFFFFFFFFFFFFFFFFFFFFFFFFFFF  
@A00155:342:HHGFNDSXY:1:1625:22110:1454 2:N:0:GAACCTAG+TCCGCATA  
GGAACGGAATCATCAGGGAGCCTACTAGACTCCGACCGTCATGGGGGTTCAAACCCATGCCCCGCCAC  
ACCGCCTTAGATCAGCTGTGTCCACTTAAGGACTCACCTCTGGCCTATGGTCATCTCAATGCCGAGAG  
+  
FFFFFFFFFFFFFFFFFFFF:F:FFFF,FFFF:FFFFFFFFFFFFFFFFFFFFFFFF,FFFFFFFFFFFF:FFFF:FFF  
FFFFFFFF:FFFFFFFFFFFFFFFFFFFFFFFFFFFFFFFFFFFFFFFF:FF:FFFF,FFFFFFFF:::FF  
@A00155:342:HHGFNDSXY:1:1625:30752:4022 2:N:0:GAACCTAG+TCCGCATA  
AAGGACTCTCCTCTGGCCTATGGTCATCTCAATGCCGAGAGGGATGTGGAGGGCGAGAGAGAGCGACT  
TCTCTCGGGCCCCACAGCCTTACAGCTGTGGAGCACGGTATCCTCTGCCGAAACAGAGGTTGGACAAGA  
+  
FFFFFFFFFFFFFFFFFFFFFFFFFFFFFFFFFFFFFFFFFFFFFFFFFFFFFFFFFFFFFFFFFFFFFFFF  
FFFFFFFFFFFFFFFFFFFFFFFF:FFFFFFFFFFFFFFFFFFFFFFFFFFFFFFFFFFFFFFFFFFFFFFFF  
@A00155:342:HHGFNDSXY:1:1625:11134:5181 2:N:0:GAACCTAG+TCCGCATA  
GAGTTGTGTAAGTTTCGTCCTAAAAAGGACTCGTCAGGTAGCCTACTAGACTACGACTTACACGGTAG  
GTCGTGAACAAGCCCGAGTACATCTCCTTTGGAAGTAGGAGACCCCTCCGGTCTTGTCCAACCTCTG  
+  
FFFFFFFFFFFFFFFFFFFFFFFFFFFFFFFFFFFF:F:FFFFFFFFFFFFFFFFFFFFFFFFFFFFFFFF,FFFF  
FFFFFFFFFFFF,FFFFFFFFFFFFFFFFFFFFFFFFFFFFFFFFFFFFFFFF:FFFFFFFFFFFFFFFFFFFF  
@A00155:342:HHGFNDSXY:1:1625:8684:5885 2:N:0:GAACCTAG+TCCGCATA  
GTTTCGTCCTAAAAAGGACTCGTCAGGTAGCCTACTAGACTACGACTTACACGGTAGGTGTCGTGAACAA  
GCCCGGAGTACATCTCCTTTGGAAGTAGGAGACCCCTCCGGTCTTGTCCAACCTCTGTTTCGGCAGAG  
+  
FFFFFFFFFFFFFFFFFFFFFFFFFFFFFFFFFFFFFFFFFFFFFFFFFFFFFFFFFFFFFFFFFFFFFFFF  
FFFFFFFFFFFFFFFFFFFFFFFFFFFFFFFFFFFFFFFFFFFFFFFFFFFFFFFFFFFFFFFFFFFFFFFF  
@A00155:342:HHGFNDSXY:1:1625:16911:24643 2:N:0:GAACCTAG+TCCGCATA  
CTACGACTTACACGGTAGGTGTCGTGAACAAGCCCGAGTACATCTCCTTTGGATCTAGGAGACCCCTCC  
GGTCTTGTCCAACCTCTGTTTCGGCAGAGGATACCGTGCTCCACAGCTGTAAGGCTGTGGGCCCGAGA  
+  
FFFFFFFFFFFFFFFFFFFFFFFFFFFFFFFFFFFFFFFFFFFFFFFFFFFFFFFFFFFFFFFFFFFFFFFF  
FFFFFFFFFFFFFFFFFFFFFFFFFFFF:F:FFFFFFFFFFFFFFFFFFFFFFFFFFFFFFFFFFFFFFFF  
@A00155:342:HHGFNDSXY:1:1625:15239:26976 2:N:0:GAACCTAG+TCCGCATA  
GTGAACAAGCCCGAGTACATCTCCTTTGGAAGTAGGAGACCCCTCCGGTCTTGTCCAACCTCTGTTT  
CGGCAGAGGATACCGTGCTCCACAGCTGTAAGGCTGTGGGCCCGAGAGAAGTCGCTCTCTCTCGCCCT  
+  
FFFFFFFFFFFFFFFFFFFFFFFFFFFFFFFFFFFFFFFFFFFFFFFFFFFFFFFFFFFFFFFFFFFFFFFF  
FFFFFFFFFFFFFFFFFFFFFFFFFFFFFFFFFFFFFFFFFFFFFFFFFFFFFFFFFFFFFFFFFFFFFFFF  
@A00155:342:HHGFNDSXY:1:1626:14389:16391 2:N:0:GAACCTAG+TCCGCATA  
TCCTAAAAAGGACTCGTCAGGTAGCCTACTAGACTACGACTTACACGGTAGGTGTCGTGAACAAGCCCG  
AGTACATCTCCTTTGGAAGTAGGAGACCCCTCCGGTCTTGTCCAACCTCTGTTTCGGCAGAGGATACC  
+  
FFFFFFFFFFFFFFFFFFFFFFFFFFFFFFFFFFFF,FFFFFFFFFFFFFFFFFFFFFFFFFFFFFFFFFFFF  
FFFFFF:FFFFFFFFFFFFFFFFFFFFFFFFFFFFFFFFFFFFFFFFFFFFFFFFFFFFFFFFFFFFFFFF  
@A00155:342:HHGFNDSXY:1:1626:15799:24189 2:N:0:GAACCTAG+TCCGCATA  
AGGACTCGTCAGGTAGCCTACTAGACTACGACTTACACGGTAGGTGTCGTGAACAAGCCCGAGTACATC

TCCTTTGGAACCAGGAGACCCCTCCGGTCTTGTCCAACCTCTGTTTCGGCAGAGGATACCGTGCTCCA  
+  
FFFFFFFFF:FFFFFFFFFFFFFFFFFFFFFFFFFFFFFFFFFFFFFFFFFFFFFFFFFFFFFFFFFFFFFFFF  
FFFFFFFFFFFFFFFFFFFFFFFFFFFFFFFFFFFFFFFFFFFFFFFFFFFFFFFFFFFFFFFFFFFFFFFF  
@A00155:342:HHGFNDSXY:1:1626:3983:26428 2:N:0:GAACCTAG+TCCGCATA  
GTGTAAGTTTCGTCCTAAAAAGGACTCGTCAGGTAGCCTACTAGACTACGACTTACACGGTAGGTCGT  
GAACAAGCCCGGAGTACATCTCCTTTGGAAGTACGAGACCCCTCCGGTCTTGTCCAACCTCTGTTTCG  
+  
FFFFFFF:FFFFFFFFFFFFFFFFFFFFFFFFFFFFFFFFFFFFFFFFFFFFFFFFFFFFFFFFFFFFFFFF  
FFFFFFF,FFFFFFFFF,:F:FFFFFFFFFFFFFFFFF:F:FFF:FFFFFFFFFFFFFF,FFFFFF:F  
@A00155:342:HHGFNDSXY:1:1626:5547:29105 2:N:0:GAACCTAG+TCCGCATA  
GGACTCGTCAGGTAGCCTACTAGACTACGACTTACACGGTAGGTCGTGAACAAGCCCGGAGTACATCT  
CCTTTGGAACCAGGAGACCCCTCCGGTCTTGTCCAACCTCTGTTTCGGCAGAGGATACCGTGCTCCAC  
+  
FFFFFFFFFFFFFFFFFFFFFFFFFFFFFFFFFFFFFFFFFFFFFFFFFFFFFFFFFFFFFFFFFFFFFFFF  
FFFFFFFFFFFFFFFFFFFFFFFFFFFFFFFFFFFFFFFFFFFFFFFFFFFFFFFFFFFFFFFFFFFFFFFF  
@A00155:342:HHGFNDSXY:1:1628:24343:5822 2:N:0:GAACCTAG+TCCGCATA  
TAGGTCGTGAACAAGCCCGGAGTACATCTCCTTTGGAAGTACGAGACCCCTCCGGTCTTGTCCAACCT  
CTGTTTCGGCAGAGGATACCGTGCTCCACAGCTGTAAGGCTGTGGGCCCGAGAGAAGTCGCTCTCTCT  
+  
FFFFFFFFFFFFFFFFFFFFFFFFFFFFFFFFFFFFFFFFFFFFFFFFFFFFFFFFFFFFFFFFFFFFFFFF  
FFFFFFFFFFFFFFFFFFFFFFFFFFFFFFFFFFFFFFFFFFFFFFFFFFFFFFFFFFFFFFFFFFFFFFFF  
@A00155:342:HHGFNDSXY:1:1629:25880:4288 2:N:0:GAACCTAG+TCCGCATA  
CAGGTAGCCTACTAGACTACGACTTACACGGTAGGTCGTGAACAAGCCCGGAGTACATCTCCTTTGGA  
ACCAGGAGACCCCTCCGGTCTTGTCCAACCTCTGTTTCGGCAGAGGATACCGTGCTCCACAGCTGTAA  
+  
FFFFFFFFFFFFFFFFFFFFFFFFFFFFFFFFFFFFFFFFFFFFFFFFFFFFFFFFFFFFFFFFFFFFFFFF  
FFFFFFFFFFFFFFFFFFFFFFFFFFFFFFFFFFFFFFFFFFFFFFFFFFFFFFFFFFFFFFFFFFFFFFFF  
@A00155:342:HHGFNDSXY:1:1629:13711:12962 2:N:0:GAACCTAG+TCCGCATA  
ACGACTTACACGGTAGGTCGTGAACAAGCCCGGAGTACATCTCCTTTGGAAGTACGAGACCCCTCCGG  
TCTTGTCCAACCTCTGTTTCGGCAGAGGATACCGTGCTCCACAGCTGTAAGGCTGTGGGCCCGAGAGA  
+  
FFFFFFFFFFFFFFFFF:FFFFFFFFFFFFFFFFFFFFFFFFFFFFFFFFFFFFFFFFFFFFFFFFFFFFFFFF  
FFFFFFFFFFFFFFFFFFFFFFFFFFFFFFFFFFFFFFFFFFFFFFFFFFFFFFFFFFFFFFFFFFFFFFFF  
@A00155:342:HHGFNDSXY:1:1629:23773:13385 2:N:0:GAACCTAG+TCCGCATA  
AAGGACTCGTCAGGTAGCCTACTAGACTACGACTTACACGGTAGGTCGTGAACAAGCCCGGAGTACAT  
CTCCTTTGGAAGTACGAGACCCCTCCGGTCTGTCCTTGTCCAACCTCTGTTTCGGCAGAGGATACCGTG  
+  
FFFFFFFFFFFFFF:FFFFFFF:FFFFFFFFFFFFFFFFFFFFFFFFFFFFFFFFFFFFFFFFFFFFFFFF  
FFFFFFFFFFFFFFFFFFFFFFFFFFFFFFFFFFFFFFFFFFFFFFFFFFFFFFFFFFFFFFFFFFFFFFFF  
@A00155:342:HHGFNDSXY:1:1629:25789:14465 2:N:0:GAACCTAG+TCCGCATA  
ACTACGACTTACACGGTAGGTCGTGAACAAGCCCGGAGTACATCTCCTTTGGAAGTACGAGACCCCTC  
CGGTCTTGTCCAACCTCTGTTTCGGCAGAGGATACCGTGCTCCACAGCTGTAAGGCTGTGGGCCCGAG  
+  
FFF:FFFFFFFFFFFFFFFFFFFFFFFFFFFFFFFFFFFFFFFFFFFFFFFFFFFFFFFFFFFFFFFFFFFF  
FFFFFFFFFFFFFFFFFFFFFFFFFFFFFFFFFFFFFFFFFFFFFFFFFFFFFFFFFFFFFFFFFFFFFFFF  
@A00155:342:HHGFNDSXY:1:1629:26106:32111 2:N:0:GAACCTAG+TCCGCATA  
GGACTCGTCAGGTAGCCTACTAGACTACGACTTACACGGTAGGTCGTGAACAAGCCCGGAGTACATCT  
CCTTTGGAAGTACGAGACCCCTCCGGTCTTGTCCAACCTCTGTTTCGGCAGAGGATACCGTGCTCCAC  
+  
FFFFFFFFFFFFFFFFFFFFFFFFFFFFFFFFFFFFFFFFFFFFFFFFFFFFFFFFFFFFFFFFFFFFFFFF  
FFFFFFFFFFFFFFFFFFFFFFFFFFFFFFFFFFFFFFFFFFFFFFFFFFFFFFFFFFFFFFFFFFFFFFFF  
@A00155:342:HHGFNDSXY:1:1629:11107:36949 2:N:0:GAACCTAG+TCCGCATA  
AGCCTACTAGACTACGACTTACACGGTAGGTCGTGAACAAGCCCGGAGTACATCTCCTTTGGAAGTAC

GAGACCCACCGGTCTTGTCCAACCTCTGTTTCGGCAGAGGATACCGTGCTCCACAGCTGTAAGGCTG  
+  
FFFFFFFFFFFFFFFFFFFFFFFFFFFFFFFFFFFFFFFFFFFFFFFFFFFFFFFFFFFFFFFFFFFFFFFF  
FFFFFFFFFFFFFFFFFFFFFFFFFFFFFFFFFFFFFFFFFFFFFFFFFFFFFFFFFFFFFFFFFFFFFFFF  
@A00155:342:HHGFNDSXY:1:1630:8666:17910 2:N:0:GAACCTAG+TCCGCATA  
AGTACATCTCCTTTGGAAGTACAGACCCCTCCGGTCTTGTCCAACCTCTGTTTCGGCAGAGGATACC  
GTGCTCCACAGCTGTAAGGCTGTGGGCCCCGAGAGAAGTCGCTCTCTCTCGCCCTCCACATCCCTCTCG  
+  
FFFFFFFFFFFFFFFFFFFFFFFFFFFFFFFFFFFFFFFFFFFFFFFFFFFFFFFFFFFFFFFFFFFFFFFF  
FFFFFFFFFFFFFFFFFFFFFFFFFFFFFFFFFFFFFFFFFFFFFFFFFFFFFFFFFFFFFFFFFFFFFFFF  
@A00155:342:HHGFNDSXY:1:1630:18927:35274 2:N:0:GAACCTAG+TCCGCATA  
TACACGGTAGGTCGTGAACAAGCCCGGAGTACATCTCCTTTGGAAGTACAGACCCCTCCGGTCTTGT  
CCAACCTCTGTTTCGGCAGAGGATACCGTGCTCCACAGCTGTAAGGCTGTGGGCCCCGAGAGAAGTCGC  
+  
FFFFFFFFFFFFFFFFFFFFFFFFFFFFFFFFFFFFFFFFFFFFFFFFFFFFFFFFFFFFFFFFFFFFFFFF  
FFFFFFFFFFFFFFFFFFFFFFFFFFFFFFFFFFFFFFFFFFFFFFFFFFFFFFFFFFFFFFFFFFFFFFFF  
@A00155:342:HHGFNDSXY:1:1631:16975:5588 2:N:0:GAACCTAG+TCCGCATA  
TTACACGGTAGGTCGTGAACAAGCCCGGAGTACATCTCCTTTGGAAGTACAGACCCCTCCGGTCTTG  
TCCAACCTCTGTTTCGGCAGAGGATACCGTGCTCCACAGCTGTAAGGCTGTGGGCCCCGAGAGAAGTCG  
+  
FFFFF::FF,FFFFFFFF:FF:FFFFFFFFFFFFFFFF:FF,FF,FF:FF:FFF:FFFF:,FFF  
FFFFF,:FFFF:FFFF,FF:FFFFF::FF,FF,F:FFFFFFFFFFFF:F,FF:FFFFFFFFFFFFF  
@A00155:342:HHGFNDSXY:1:1631:15845:16094 2:N:0:GAACCTAG+TCCGCATA  
ACCGCCTTAGATCAGCTGTGTCCACTTAAGGACTCACCTCTGGCCTATGGTCATCTCAATGCCGAGAG  
GGATGTAGAGGGCGAGAGAGAGCGACTTCTCTCGGGCCACAGCCTTACAGCTGTGGAGCACGGTATC  
+  
FFFFFFFFFFFFFFFFFFFFFFFFFFFFFFFFFFFFFFFFFFFFFFFFFFFFFFFFFFFFFFFFFFFFFFFF  
FFFFFFFFFFFFFFFFFFFFFFFFFFFFFFFFFFFFFFFFFFFFFFFFFFFFFFFFFFFFFFFFFFFFFFFF  
@A00155:342:HHGFNDSXY:1:1631:2908:16799 2:N:0:GAACCTAG+TCCGCATA  
TAGGTCGTGAACAAGCCCGGAGTACATCTCCTTTGGAACCAGGAGACCCCTCCGGTCTTGTCCAACCT  
CTGTTTCGGCAGAGGATACCGTGCTCCACAGCTGTAAGGCTGTGGGCCCCGAGAGAAGTCGCTCTCTCT  
+  
FFFFFFFFFFFFFFFFFFFFFFFFFFFFFFFFFFFFFFFFFFFFFFFFFFFFFFFFFFFFFFFFFFFFFFFF  
FFFFFFFFFFFFFFFFFFFFFFFFFFFFFFFFFFFFFFFFFFFFFFFFFFFFFFFFFFFFFFFFFFFFFFFF  
@A00155:342:HHGFNDSXY:1:1631:23484:19711 2:N:0:GAACCTAG+TCCGCATA  
GTACATCTCCTTTGGAAGTACAGACCCCTCCGGTCTTGTCCAACCTCTGTTTCGGCAGAGGATACCG  
TGCTCCACAGCTGTAAGGCTGTGGGCCCCGAGAGAAGTCGCTCTCTCTCGCCCTCCACATCCCTCTCGG  
+  
FFFFFFFFFFFFFFFFFFFFFFFFFFFFFFFFFFFFFFFFFFFFFFFFFFFFFFFFFFFFFFFFFFFFFFFF  
FFFFFFFFFFFFFFFFFFFFFFFFFFFFFFFFFFFFFFFFFFFFFFFFFFFFFFFFFFFFFFFFFFFFFFFF  
@A00155:342:HHGFNDSXY:1:1631:29053:28447 2:N:0:GAACCTAG+TCCGCATA  
GAGACCCCTCCGGTCTTGTCCAACCTCTGTTTCGGCAGAGGATACCGTGCTCCACAGCTGTAAGGCTG  
TGGGCCCCGAGAGAAGTCGCTCTCTCTCGCCCTCCACATCCCTCTCGGCATTGAGATGACCATAGGCC  
+  
FFFFFFFFFFFFFFFFFFFFFFFFFFFFFFFFFFFFFFFFFFFFFFFFFFFFFFFFFFFFFFFFFFFFFFFF  
FFFFFFFFFFFFFFFFFFFFFFFFFFFFFFFFFFFFFFFFFFFFFFFFFFFFFFFFFFFFFFFFFFFFFFFF  
@A00155:342:HHGFNDSXY:1:1631:1452:33035 2:N:0:GAACCTAG+TCCGCATA  
AGGTCGTGAACAAGCCCGGAGTACATCTCCTTTGGAACCAGGAGACCCCTCCGGTCTTGTCCAACCTC  
TGTTTCGGCAGAGGATACCGTGCTCCACAGCTGTAAGGCTGTGGGCCCCGAGAGAAGTCGCTCTCTCTC  
+  
FFFFFFFFFFFF:FFFFFFFFFFFFFFFF:FFFF:FFFFFFFFFFFFFFFFFFFFFFFF,FFFFFFFFFFFF  
FFFFFFFFFFFF:FFFFFFFFFFFFFFFFFFFFFFFFFFFFFFFFFFFFFFFFFFFFFFFFFFFFFFFFFFFF  
@A00155:342:HHGFNDSXY:1:1632:27317:9471 2:N:0:GAACCTAG+TCCGCATA  
AGTTGTGTAAGTTTCGTCCTAAAAAGGACTCGTCAGGTAGCCTACTAGACTACGACTTACACGGTAGG



TCGTGAACAAGCCCGGAGTACATCTCCTTTGGAAGTAGGAGACCCCTCCGGTCTTGTCCAACCTCTGT  
+  
FFFFFFFFFFFFFFFFFFFFFFFFFFFFFFFFFFFFFFFFFFFFFFFFFFFFFFFFFFFFFFFFFFFFFFFF  
FFFFFFFFFFFFFFFFFFFFFFFFFFFFFFFFFFFFFFFFFFFFFFFFFFFFFFFFFFFFFFFFFFFFFFFF  
@A00155:342:HHGFNDSXY:1:1632:21721:19351 2:N:0:GAACCTAG+TCCGCATA  
CCCTCCGGTCTTGTCCAACCTCTGTTTCGGCAGAGGATACCGTGCTCCACAGCTGTAAGGCTGTGGG  
CCCGAGAGAAGTCGCTCTCTCTCGCCCTTCACATCCCTCTCGGCATTGAGATGACCATAGGCCAGAGG  
+  
FFFFFFFFFFFFFFFFFFFFFFFFFFFFFFFFFFFFFFFFFFFFFFFFFFFFFFFFFFFFFFFFFFFFFFFF  
FFFF:F:FFFFFFFFFFFFFFFFFFFFFFFFFFFFFFFFFFFFFFFFFFFFFFFFFFFFFFFFFFFFFFFF  
@A00155:342:HHGFNDSXY:1:1633:22842:22169 2:N:0:GAACCTAG+TCCGCATA  
CCGGAGTACATCTCCTTTGGAAGTAGGAGACCCCTCCGGTCTTGTCCAACCTCTGTTTCGGCAGAGGA  
TACCGTGCTCCACAGCTGTAAGGCTGTGGGCCCGAGAGAAGTCGCTCTCTCTCGCCCTCTACATCCCT  
+  
FFFFFFFFFFFFFFFFFFFFFFFFFFFFFFFFFFFFFFFFFFFFFFFFFFFFFFFFFFFFFFFFFFFFFFFF  
F:FFFFFFFFFFFFFFFFFFFFFFFFFFFFFFFFFFFFFFFFFFFFFFFFFFFFFFFFFFFFFFFFFFFFFFFF  
@A00155:342:HHGFNDSXY:1:1633:30942:24925 2:N:0:GAACCTAG+TCCGCATA  
GAACCAGGAGACCCCTCCGGTCTTGTCCAACCTCTGTTTCGGCAGAGGATACCGTGCTCCACAGCTGT  
AAGGCTGTGGGCCCGAGAGAAGTCGCTCTCTCTCGCCCTCCACATCCCTCTCGGCATTGAGATGACCA  
+  
FFFFFFFFFFFFFFFFFFFFFFFFFFFFFFFFFFFFFFFFFFFFFFFFFFFFFFFFFFFFFFFFFFFFFFFF  
FFFFFFFFFFFFFFFFFFFFFFFFFFFFFFFFFFFFFFFFFFFFFFFFFFFFFFFFFFFFFFFFFFFFFFFF  
@A00155:342:HHGFNDSXY:1:1634:29451:10786 2:N:0:GAACCTAG+TCCGCATA  
ACTTACACGGTAGGTCGTGAACAAGCCCGGAGTACATCTCCTTTGGAAGTAGGAGACCCCTCCGGTCT  
TGTCCAACCTCTGTTTCGGCAGAGGATACCGTGCTCCACAGCTGTAAGGCTGTGGGCCCGAGAGAAGT  
+  
FFFFFFFFFFFFFFFFFFFFFFFFFFFFFFFFFFFFFFFFFFFFFFFFFFFFFFFFFFFFFFFFFFFFFFFF  
FFFFFFFFFFFFFFFFFFFFFFFFFFFFFFFFFFFFFFFFFFFFFFFFFFFFFFFFFFFFFFFFFFFFFFFF  
@A00155:342:HHGFNDSXY:1:1634:19623:33974 2:N:0:GAACCTAG+TCCGCATA  
GAGACCCCTCCGGTCTTGTCCAACCTCTGTTTCGGCAGAGGATACCGTGCAACACAGCTGTAAGGCTG  
TGGGCCCGAGAGAAGTCGCTCTCTCTCGCCCTCCACATCCCTCTCGGCATTGAGATGACCATAGGCCA  
+  
FFFFFFFFFFFFFFFFFFFFFFFFFFFFFFFFFFFFFFFFFFFFFFFFFFFFFFFFFFFFFFFFFFFFFFFF  
FFFFFFFFFFFFFFFFFFFFFFFFFFFFFFFFFFFFFFFFFFFFFFFFFFFFFFFFFFFFFFFFFFFFFFFF  
@A00155:342:HHGFNDSXY:1:1634:19669:34021 2:N:0:GAACCTAG+TCCGCATA  
GAGACCCCTCCGGTCTTGTCCAACCTCTGTTTCGGCAGAGGATACCGTGCAACACAGCTGTAAGGCTG  
TGGGCCCGAGAGAAGTCGCTCTCTCTCGCCCTCCACATCCCTCTCGGCATTGAGATGACCATAGGCCA  
+  
FFFFFFFFFFFFFFFFFFFFFFFFFFFFFFFFFFFFFFFFFFFFFFFFFFFFFFFFFFFFFFFFFFFFFFFF  
FFFFFFFFFFFFFFFFFFFFFFFFFFFFFFFFFFFFFFFFFFFFFFFFFFFFFFFFFFFFFFFFFFFFFFFF  
@A00155:342:HHGFNDSXY:1:1635:17788:13009 2:N:0:GAACCTAG+TCCGCATA  
GTTTCGTCCTAAAAAGGACTCGTCAGGTAGCCTACTAGACTACGACTTACACGGTAGGTCGTGAACAA  
GCCCGGAGTACATCTTCTTTGGAAGTAGGAGACCCCTCCGGTCTTGTCCAACCTCTGTTTCGGCAGAG  
+  
FFFFFFFFFFFFFFFFFFFFFFFFFFFFFFFFFFFFFFFFFFFFFFFFFFFFFFFFFFFFFFFFFFFFFFFF  
:FFFFFFFFFFFFFFFFFFFFFFFFFFFFFFFFFFFFFFFFFFFFFFFFFFFFFFFFFFFFFFFFFFFFFFFF  
@A00155:342:HHGFNDSXY:1:1635:27389:22153 2:N:0:GAACCTAG+TCCGCATA  
TAGGTCGTGAACAAGCCCGGAGTACATCTCCTTTGGAACAAGGAGACCCCTCCGGTCTTGTCCAACCT  
CTGTTTCGGCAGAGGATACCGTGCTCCACAGCTGTAAGGCTGTGGGCCCGAGAGAAGTCGCTCTCTCT  
+  
FFFFFFFFFFFFFFFFFFFFFFFFFFFFFFFFFFFFFFFFFFFFFFFFFFFFFFFFFFFFFFFFFFFFFFFF  
FFFFFFFFFFFFFFFFFFFFFFFFFFFFFFFFFFFFFFFFFFFFFFFFFFFFFFFFFFFFFFFFFFFFFFFF  
@A00155:342:HHGFNDSXY:1:1636:20980:16031 2:N:0:GAACCTAG+TCCGCATA  
AGGACGAAACCGTCGTAACCTCTTCGAGTTGTGTAAGTTTCGTCCTAAAAAGGACTCGTCAGGTAGCCT

ACTAGACTACGACTTACACGGTAGGTCTGTGAACAAGCCCGGAGTACATCTCCTTTGGAAGTACAGGAGAC  
+  
FFFFFFFFFFFFFFFFFFFFFFFFFFFFFFFFFFFFF:FFFFFFFFFF:FFFFFFFFFFFFFFFFFFFFFFFFFFFFFFFFFFFF  
FFFFFFFFFFFFFFFFFFFFFFFFFFFFFFFFFFFFF:FFFFFFFFFFFFFFFFFFFFFFFFFFFFFFFFFFFFF:FFFFFFFFFFFFFFFFFFFF  
@A00155:342:HHGFNDSXY:1:1636:24532:22748 2:N:0:GAACCTAG+TCCGCATA  
GTTGTGTAAGTTTCGTCTAAAAAGGACTCGTCAGGTAGCCTACTAGACTACGACTTACACGGTAGGT  
CGTGAACAAGCCCCGAGTACATCTCCTTTGGAAGTACAGGAGACCCCTCCGGTCTTGTCACCACTCTGTT  
+  
F:FFFFFFFFFFFFFFFFFFFF:FFFF::FFFFFFFFFFFFFFFFFFFFFFFFFFFFFFFFFFFFFFFFFFFFFFFFFFFFFFF  
FFFFFFFFFFFFFFFFFFFFFFFFFFFFFFFFFFFFF:FFFFFFFFFFFFFFFFFFFFFFFFFFFFFFFFFFFFFFFFFFFFFFFFFFFFFFF  
@A00155:342:HHGFNDSXY:1:1636:17824:24565 2:N:0:GAACCTAG+TCCGCATA  
GAACTAGGAGACCCCTCCGGTCTTGTCACCACTCTGTTTCGGCAGAGGATACCGTGCTCCACAGCTGT  
AAGGCTGTGGGCCCGAGAGAAGTCGCTCTCTCTCGCCCTCCACATCCCTCTCGGCAGTGAGATGACCA  
+  
FFFFFFFFFFFFFFFFFFFFFFFFFFFFF:FFFFFFFFFFFFFFFFFFFFFFFFFFFFF:FFFFFFFFFFFFFFFFFFFFFFFFFFFFFFF  
FFFFFFFFFFFFFFFFFFFFFFFFFFFFFFFFFFFFF:FFFFFFFFFFFFFFFFFFFFFFFFFFFFFFFFFFFFFFFFFFFFFFFFFFFFFFF, FFFFFFFFFFFFF  
@A00155:342:HHGFNDSXY:1:1636:22797:28260 2:N:0:GAACCTAG+TCCGCATA  
TCCTTGGAACGACTCATCAGGGAGCCTACTAGACTCCGACCGTCATGGGGGTTCAAACCATGCCCC  
GCCACACCGCCTTAGATCAGCTGTGTCCAATTAAAGACTCACCTCTGGCCTATGGTCATCTCAATACC  
+  
FFFF:FFFFFFFFFFFFFFFFFFFFFFFFFFFFFFFFFFFFF:FFFFFFFFFFFFFFFFFFFFFFFFFFFFFFFFFFFFF:F:  
FFFFFFFFFFFFFFFFFFFFFFFFFFFFFFFFFFFFF, FFFFFFFFFFFFFF, FFFFFFFFFFFFFFFFFF:FFFFFFF  
@A00155:342:HHGFNDSXY:1:1637:29731:13244 2:N:0:GAACCTAG+TCCGCATA  
ACTAGACTACGACTTACACGGTAGGTCTGTGAACAAGCCCGGAGTACATCTCCTTTGGAAGTACAGGAGAC  
CCCTCCGGTCTTGTCACCACTCTGTTTCGGCAGAGGATACCGTGCTCCACAGCTGTAAGGCTGTGGGC  
+  
FFFFFFFFFFFFFFFFFFFFFFFFFFFFF:FFFFFFFFFFFFFFFFFFFFFFFFFFFFF:FFFFFFFFFFFFFFFFFFFFFFFFFFFFFFF  
FFFFFFFFFFFFFFFFFFFFFFFFFFFFF:FFFFFFFFFFFFFFFFFFFFFFFFFFFFFFFFFFFFF:F:FFFFFF, FFFFFFFFFFFFFFFFFF  
@A00155:342:HHGFNDSXY:1:1637:24641:14199 2:N:0:GAACCTAG+TCCGCATA  
GTTGTGTAAGTTTCGTCTAAAAAGGACTCGTCAGGTAGCCTACTAGACTACGACTTACACGGTAGGT  
CGTGAACAAGCCCCGAGTACATCTCCTTTGGAACAGGAGACCCCTCCGGTCTTGTCACCACTCTGTT  
+  
FFFFFFFFFFFFF:FFFFFFFFFFFFF:FFF:FFFFFF:FFFFFFFFFFFFFFFFFFFFFFFFFFFFFFFFFFFFF, FF  
FF:FFFFFFFFF:FFFFFFFFFFFFFFFFF:FFFFFF, FFFFFFFF:, F:FFFFF:F:FFFF::F:FF:FFFF  
@A00155:342:HHGFNDSXY:1:1637:8160:16877 2:N:0:GAACCTAG+TCCGCATA  
GAAACCGTCGTTACTCTTCGAGTTGTGTAAGTTTCGTCTAAAAAGGACTCGTCAGGTAGCCTACTAG  
ACTACGACTTACACGGTAGGTCGTGAACAAGCCCGGAGTACATCTCCTTTGGAAGTACAGGAGACCCCTC  
+  
FFFFFFFFFFFFFFFFFFFFFFFFFFFFF, FFFFFFFFFFFFFFFFFFFFFFFFFFFFFF:FFFFFFFFFFFFFFFFFFFFF:FFFFFFFFFFFFFFFFF  
FFFFFFFFFFFFFFFFFFFFFFFFFFFFFFFFFFFFF:FFFFFFFFFFFFFFFFFFFFFFFFFFFFFFFFFFFFF:F:FFFFFFFFF:FFFF  
@A00155:342:HHGFNDSXY:1:1637:8467:17033 2:N:0:GAACCTAG+TCCGCATA  
GAAACCGTCGTTACTCTTCGAGTTGTGTAAGTTTCGTCTAAAAAGGACTCGTCAGGTAGCCTACTAG  
ACTACGACTTACACGGTAGGTCGTGAACAAGCCCGGAGTACATCTCCTTTGGAAGTACAGGAGACCCCTC  
+  
FFFFFFFFFFFFFFFFFFFFFFFFFFFFFFFFFFFFF:FFFFFFFFFFFFFFFFFFFFFFFFFFFFFFFFFFFFFFFFFFFFFFFFFFFFFFF  
FFFFFFFFF:FFFFFFFFF:FFFFFFFFFFFFFFFFFFFFFFFFFFFFFFFFFFFFFFFFFFFFFFFFFFFFFFFFFFFFF:FFF  
@A00155:342:HHGFNDSXY:1:1637:32750:18380 2:N:0:GAACCTAG+TCCGCATA  
ACGACTTACACGGTAGGTCGTGAACAAGCCCGGAGTACATCTCCTTTGGAAGTACAGGAGACCCCTCCGG  
TCTTGTCACCACTCTGTTTCGGCAGAGGATACCGTGCTCCACAGCTGTAAGGCTGTGGGCCCGAGAGA  
+  
FFFFFFFFFFFFFFFFFFFFFFFFFFFFFFFFFFFFF:FFFFFF, FFFFFFFFFFFFFFFFFFFFFFFFFFFFFFFF  
FFFFFFFFFFFFFFFFF:FFFFFFFFFFFF:FFFFFFFFFFFFFFFFFFFFFFFFFFFFFFFFFFFFFFFFFFFFFFFFFFFFF  
@A00155:342:HHGFNDSXY:1:1637:13259:18944 2:N:0:GAACCTAG+TCCGCATA  
TCTTGTCACCACTCTGTTTCGGCAGAGGATACCGTGCTCCACAGCTGTAAGGCTGTGGGCCCGAGAGA

AGTCGCTCTCTCTCGCCCTCCACATCCCTCTCGGCATTGAGATGACCATAGGCCAGAGGTGAGTCTTT  
+  
FFFFFFFFFFFFFFFFFFFFFFFFFFFFFFFFFFFFFFFFFFFFFFFFFFFFFFFFFFFFFFFFFFFFFFFF:FFFFFFFFFFFFFFF  
FFFFFFFFFFFFFFFFFFFFFFFFFFFFFFFFFFFFFFFFFFFFFFFFFFFFFFFFFFFFFFFFFFFFFFFF:FFFFFFFFFFFFFFF  
@A00155:342:HHGFNDSXY:1:1638:18656:18270 2:N:0:GAACCTAG+TCCGCATA  
GAAACCGTCGTTACTCTTCGAGTTGTGTAAGTTTCGTCCTAAAAAGGACTCGTCAGGTAGCCTACTAG  
ACTACGACTTACACGGTAGGTCGTGAACAAGCCCGGAGTACATCTCCTTTGGAAGTACTAGGAGACCCCTC  
+  
FFFFFFFFFFFFFFFFFFFFFFFFFFFFFFFFFFFFFFFFFFFFFFFFFFFFFFFFFFFFFFFFFFFFFFFF:FFFFFFFFFFFFFFF  
FFFFFFFFFFFFFFFFFFFFFFFFFFFFFFFFFFFFFFFFFFFFFFFFFFFFFFFFFFFFFFFFFFFFFFFF:FFFFFFFFFFFFFFF  
@A00155:342:HHGFNDSXY:1:1638:17662:18584 2:N:0:GAACCTAG+TCCGCATA  
GAAACCGTCGTTACTCTTCGAGTTGTGTAAGTTTCGTCCTAAAAAGGACTCGTCAGGTAGCCTACTAG  
ACTACGACTTACACGGTAGGTCGTGAACAAGCCCGGAGTACATCTCCTTTGGAAGTACTAGGAGACCCCTC  
+  
FFF:FFFFFFFFF,FFFFFFF,FFFFFF:FFFFFFFFF:FFFF:FFFFFFFFFFFFFFFFFFFFFFFFF  
FFFFFFFFFFFFFFFFFFFFFFFFF:FFFFFFF:FFFFFFFFFFFFFFF:FFFFFFFFFFFFFFFFFFFFFFFFF  
@A00155:342:HHGFNDSXY:1:1638:12020:19335 2:N:0:GAACCTAG+TCCGCATA  
TAGCCTACTAGACTACGACTTACACGGTAGGTCGTGAACAAGCCCGGAGTACATCTCCTTTGGAGCTA  
GGAGACCCCTCCGGTCTTGTCCAACCTCTGTTTCGGCAGAGGATACCGTGCTCCACAGCTGTAAGGCT  
+  
FFFFFFFFFFFFFFFFFFFFFFFFFFFFFFFFFFFFFFFFFFFFFFFFFFFFFFFFFFFFFFFFFFFFFFFF:FFF:FFFFFFFFFFFFFFFFFFFFFFFFF  
FFF:FFFFFFFFF,FFFFFFFFFFFFFFFFFFFFFFFFFFFFFFFFFFFFFFFFFFFFFFFFFFFFFFFFF  
@A00155:342:HHGFNDSXY:1:1639:4616:16282 2:N:0:GAACCTAG+TCCGCATA  
AGGATACCGTGCTCCACAGCTGTAAGGCTGTGGGCCCGAGAGAAGTCGCTCTCTCTCGCCCTCCACAT  
CCCTCTCGGCATTGAGATGACCATAGGCCAGAGGTGAGTCCTTAAGTGGACACAGCTGAT  
+  
:FFFFFFFFFFFFFFFFFFFFFFFFFFFFFFFFFFFFFFFFFFFFFFFFFFFFFFFFFFFFFFFFFFFFFFFFF  
FFFFFFFFFFFFFFFFFFFFFFFFF:FFFFFFF:FFFF:FFFFFFFFF:FFFFFFFFFFF:F,FFF:FFFF  
@A00155:342:HHGFNDSXY:1:1639:4851:16407 2:N:0:GAACCTAG+TCCGCATA  
AGGATACCGTGCTCCACAGCTGTAAGGCTGTGGGCCCGAGAGAAGTCGCTCTCTCTCGCCCCCACAT  
CCCTCTCGGCATTGAGATGACCATAGGCCAGAGGTGAGTCCTTAAGTGGACACAGCTGAT  
+  
FFFFF:FFFFFFFFFFFFFFFFFFFFFFFFFFFFFFFFFFFFFFFFFFFFFFFFFFFFFFFFFFFFFFFFF:FFFFFFFFFFFFFFF:FFFF  
FFFFFFFFFFFFFFFFFFFFFFFFFFFFFFFFFFFFFFFFFFFFFFFFFFFFFFFFFFFFFFFFFFFFFFFF:FFFFFFFFF  
@A00155:342:HHGFNDSXY:1:1639:8350:25692 2:N:0:GAACCTAG+TCCGCATA  
AGCCCGGAGTACATCTCCTTTGGAAGTACTAGGAGACCCCTCCGGTCTTGTCCAACCTCTGTTTCGGCAGA  
GGATACCGTGCTCCACAGCTGTAAGGCTGTGGGCCCGAGAGAAGTCGCTCTCTCTCGCCCTCTACATC  
+  
FFFFFFFFFFFFFFFFFFFFFFFFFFFFFFFFFFFFFFFFFFFFFFFFFFFFFFFFFFFFFFFFFFFFFFFF:FFFFFFFFFFFFFFF  
FFFFF:FFFFFFFFFFFFFFFFF:FFF:FFFFFFFFFFFFFFFFFFFFFFFFFFFFFFFFFFFFFFFFF  
@A00155:342:HHGFNDSXY:1:1639:29523:28635 2:N:0:GAACCTAG+TCCGCATA  
TCCTAAAAAGGACTCGTCAGGTAGCCTTCTAGACTACGACTTACACGGTAGGTCGTGAACAAGCCCGG  
AGTACATCTCCTTTGGAAGTACTAGGAGACCCCTCCGGTCTTGTCCAACCTCTGTTTCGGCAGAGGATACC  
+  
FFFF,FFFFFFFFFFFFFFFFFFFFFFFFFFFFFFFFFFFFFFFFFFFFFFFFFFFFFFFFFFFFFFFFF:FFFFFFF:  
FFF:FFFFFFFFFFF:FFFFFFFFFFF:FFFFFFFFFFFFFFFFF:FFFFF:FFFFFFFFFFFFFFFFF  
@A00155:342:HHGFNDSXY:1:1639:6135:29778 2:N:0:GAACCTAG+TCCGCATA  
AGGATACCGTGCTCCACAGCTGTAAGGCTGTGGGCCCGAGAGAAGTCGCTCTCTCTCGCCCTCCACAT  
CCCTCTCGGCATTGAGATGACCATAGGCCAGAGGTGAGTCCTTAAGTGGACACAGCTGAT  
+  
FFFFFFFFFFFFFFFFFFFFFFFFFFFFFFFFFFFFFFFFFFFFFFFFFFFFFFFFFFFFFFFFFFFFFFFFF  
FFFFFFFFFFFFFFFFFFFFFFFFFFFFFFFFFFFFFFFFFFFFFFFFFFFFFFFFFFFFFFFFFFFFFFFF:FFFFFFF,  
@A00155:342:HHGFNDSXY:1:1640:30761:6042 2:N:0:GAACCTAG+TCCGCATA  
ACGACTTACACGGTAGGTCGTGAACAAGCCCGGAGTACATCTCCTTTGGAAGTACTAGGAGACCCCTCCGG

TCTTGTCCAACCTCTGTTTCGGCAGAGGATACCGTGCTCCACAGCTGTAAGGCTGTGGGCCCCGAGAGA  
+  
FFFFFFFFFFFFFFFFFFFFFFFFFFFFFFFFFFFFFFFFFFFFFFFFFFFFFFFFFFFFFFFFFFFFFFFF  
FF,FFFFFFFFFFFFFFFFFFFFFFFFFFFFFFFFFFFFFFFFFFFFFFFFFFFFFFFFFFFFFFFFFFFFFFFF  
@A00155:342:HHGFNDSXY:1:1640:19623:10426 2:N:0:GAACCTAG+TCCGCATA  
TCTTCGAGTTGTGTAAGTTTCGTCCTAAAAAGGACTCGTCAGGTAGCCTACTAGACTACGACTTACAC  
GGTAGGTCGTGAACAAGCCCGGAGTACATCTCCTTTGGAAGTGGAGACCCCTCCGGTCTTGTCCAAC  
+  
FFFFFFFFFFFFFFFFFFFFFFFFFFFFFFFFFFFFFFFFFFFFFFFFFFFFFFFFFFFFFFFFFFFFFFFF  
FFFFFFFFFFFFFFFFFFFFFFFFFFFFFFFFFFFFFFFFFFFFFFFFFFFFFFFFFFFFFFFFFFFFFFFF  
@A00155:342:HHGFNDSXY:1:1640:25889:15107 2:N:0:GAACCTAG+TCCGCATA  
ACCTCTGTTTCGGCAGAGGATACCGTGCTCCACAGCTGTAAGGCTGTGGGCCCCGAGAGAAGTCGCTCT  
CTCTCGCCCTCTACATCCCTCTCGGCATTGAGATGACCATAGGCCAGAGGTGAGTCCTTAAGTGGACA  
+  
FFFFFFFFFFFFFF:FFFFFFFFFFFFFFFFFFFFFFFFFFFFFFFFFFFFFFFFFFFFFFFFFFFFFFFF  
FFFFFFFFFFFFFFFFFFFFFFFFFFFFFFFFFFFFFFFFFFFFFFFFFFFFFFFFFFFFFFFFFFFFFFFF  
@A00155:342:HHGFNDSXY:1:1640:3721:28510 2:N:0:GAACCTAG+TCCGCATA  
GTCCAACCTCTGTTTCGGCAGAGGATACCGTGCTCCACAGCTGTAAGGCTGTGGGCCCCGAGAGAAGTC  
GCTCTCTCTCGCCCTCCACATCCCTCTCGGCATTGAGATGACCATAGGCCAGAGGTGAG  
+  
FFFFFFFFFFFFFFFFFFFFFFFFFFFFFFFFFFFFFFFFFFFFFFFFFFFFFFFFFFFFFFFFFFFFFFFF  
FFFFFFFFFFFFFFFFFFFFFFFFFFFFFFFFFFFFFFFFFFFFFFFFFFFFFFFFFFFFFFFFFFFFFFFF  
@A00155:342:HHGFNDSXY:1:1641:7392:4335 2:N:0:GAACCTAG+TCCGCATA  
GGACTCGTCAGGTAGCCTACTAGACTACGACTTACACGGTAGGTCGTGAACAAGCCCGGAGTACATCT  
CCTTTGGAAGTGGAGACCCCTCCGGTCTTGTCCAACCTCTGTTTCGGCAGAGGATACCGTGCTCCAC  
+  
FFFFFFFFFFFFFFFFFFFFFFFFFFFFFFFFFFFFFFFFFFFFFFFFFFFFFFFFFFFFFFFFFFFFFFFF  
FFFFFFFFFFFFFFFFFFFFFFFFFFFFFFFFFFFFFFFFFFFFFFFFFFFFFFFFFFFFFFFFFFFFFFFF  
@A00155:342:HHGFNDSXY:1:1642:7292:9956 2:N:0:GAACCTAG+TCCGCATA  
GTAGCCTACTAGACTACGACTTACACGGTAGGTCGTGAACAAGCCCGGAGTACATCTCCTTTGGAAGT  
AGGAGACCCCTCCGGTCTTGTCCAACCTCTGTTTCGGCAGAGGATACCGTGCTCCACAGCTGTAAGGC  
+  
FFFFFFFFFFFFFFFFFFFFFFFFFFFFFFFFFFFFFFFFFFFFFFFFFFFFFFFFFFFFFFFFFFFFFFFF  
FFFFFFFFFFFFFFFFFFFFFFFFFFFFFFFFFFFFFFFFFFFFFFFFFFFFFFFFFFFFFFFFFFFFFFFF  
@A00155:342:HHGFNDSXY:1:1642:10393:11663 2:N:0:GAACCTAG+TCCGCATA  
CTCTTTGAGTTGTGTAAGTTTCGTCCTAAAAAGGACTCGTCAGGTAGCCTACTAGACTACGACTTACA  
CGGTAGGTCGTGAACAAGCCCGGAGTACATCTCCTTTGGAAGTGGAGACCCCTCCGGTCTTGTCCAA  
+  
FFFFFFFFFFFF:FFFFFFFFFFFFFFFFFFFFFFFFFFFFFFFFFFFFFFFFFFFFFFFFFFFFFFFF  
FFFFFFFFFFFFFFFFFFFFFFFFFFFFFFFFFFFFFFFFFFFFFFFFFFFFFFFFFFFFFFFFFFFFFFFF  
@A00155:342:HHGFNDSXY:1:1642:13105:14043 2:N:0:GAACCTAG+TCCGCATA  
TACTCTTGAGTTGTGTAAGTTTCGTCCTAAAAAGGACTCGTCAGGTAGCCTACTAGACTACGACTTA  
CACGGTAGGTCGTGAACAAGCCCGGAGTACATCTCCTTTGGAAGTGGAGACCCCTCCGGTCTTGTCC  
+  
FFFFFFFFFFFFFFFFFFFF:FFFFFFF:FFFFFFFFFFFFFFFFFFFF:FFFFFFFFFFFFFFFFFFFF:FFFFFFF  
FFFFFFFFFFFFFFFFFFFFFFFFFFFFFFFFFFFFFFFFFFFFFFFFFFFFFFFFFFFFFFFFFFFFFFFF  
@A00155:342:HHGFNDSXY:1:1642:4426:23062 2:N:0:GAACCTAG+TCCGCATA  
CGACGGTTTCGTCCTTGAACGGACTCATCAGGGAGCCTACTAGACTCCGACCGTCATGGGGGTTCAA  
ACCCATGCCCCGCCACACCGCCTTAGATCAGCTGTGTCCACTTAAGGACTCACCTCTGGCCTATGGTC  
+  
FFFFFFFFFFFFFFFFFFFFFFFFFFFFFFFFFFFFFFFFFFFFFFFFFFFFFFFFFFFFFFFFFFFFFFFF  
FFFFFFFFFFFFFFFFFFFFFFFFFFFFFFFFFFFFFFFFFFFFFFFFFFFFFFFFFFFFFFFFFFFFFFFF  
@A00155:342:HHGFNDSXY:1:1642:22923:34178 2:N:0:GAACCTAG+TCCGCATA  
TAGCCTACTAGACTACGACTTACACGGTAGGTCGTGAACAAGCCCGGAGTACATCTCCTTTGGAAGT

+  
GGAGACCCCTCCGGTCTTGTC AACCTCTGTTTC GGCAGAGGATACCGTGCTCCACAGCTGTAAGCC  
FFFFFFFFFFFFFFFFFFFFFFFFFFFFFFFFFFF, FFFFFFFFFFFFFFFFFFFFFFFF: FFFFFFFFFFFFFFFFFFFF  
FFFFFFFFFFFFFFFFFFFFFFFFFFFFFFFFFFFFFFFFFFFFFFFFFFFFFFFFFFFFF: : FFFFFFFFFFFFFFFFFFF: FFFFFF  
@A00155:342:HHGFNDSXY:1:1643:5801:3834 2:N:0:GAACCTAG+TCCGCATA  
TCCAAGGACGAAACCGTCGTTACTCTTCGAGTTGTGTAAGTTTCGTCCTAAAAAGGACTCGTCAGGTA  
GCCTACTAGACTACGACTTACACGGTAGGTCGTGAACAAGCCC GGAGTACATCTCCTTTGGA ACTAGG  
+  
FFFFFFFFFFFFFFFFFFFFFFFFFFFFFFFFFFFFF, FFFFFFFFFFFFFFFFFFFFFFFF: FFFFFFFFFFFFFFFFFFFF  
FFFFFFFFFFFFFFF: FFFFFFFFFFFFFFFFFF: FFFFFFFFFFFFFFFF, FFFFFFFFFFFFFFFFFFFF, FFFFF, FFFFF  
@A00155:342:HHGFNDSXY:1:1643:32570:6605 2:N:0:GAACCTAG+TCCGCATA  
CCCCCTCCGGTCTTGTC AACCTCTGTTTC GGCAGAGGATACCGTGCTCCACAGCTGTAAGGCTGTGGG  
CCCGAGAGAAGTCGCTCTCTCTCGCCCTTCACATCCCTCTCGGCATTGAGATGACCATAGGCCAGAGG  
+  
FFFFFFFFFFFFFFFFFFFFFFFFFFFFFFFFFFFFF: FFFFFFFFFFFFFFFFFFFFFFFF: FFFFF: FFF  
FFFFFFFFFFF, FFFFFFFFFFFFFFFFFFFFFFFFFFFFFFFFFFFFFFFFFFFFFFFF: FFFFFFFFFFFFF: :, FFFF: FFFF  
@A00155:342:HHGFNDSXY:1:1643:32154:12680 2:N:0:GAACCTAG+TCCGCATA  
ACGACTTACACGGTAGGTCGTGAACAAGCCC GGAGTACATCTCCTTTGGA ACCAGGAGACCCCTCCGG  
TCTTGTC AACCTCTGTTTC GGCAGAGGATACCGTGCTCCACAGCTGTAAGGCTGTGGGCCCGAGAGA  
+  
: FFFF: FFFFFFFFF: FFFFFFFFFFFFFFFFFFFFFFFFFFFFFFFFFFFFFFFFFFFFFFFFFFFFFF  
FF: FFFFFFFFFFFFFFFFFFFFFFFFFFFFFFFFFFFFFFFF, FFFFFFFFFFFFFFFFFFFFFFFF, FFFFFFFFFFFFFFFFFF: FF  
@A00155:342:HHGFNDSXY:1:1643:14669:32002 2:N:0:GAACCTAG+TCCGCATA  
GGACTCGTCAGGTAGCCTACTAGACTACGACTTACACGGTAGGTCGTGAACAAGCCC GGAGTACATCT  
CCTTTGGA ACTAGGAGACCCCTCCGGTCTTGTC AACCTCTGTTTC GGCAGAGGATACCGTGCTCCAC  
+  
FFFFFFFFFFFFFFFFFFFFFFFFFFFFFFFFFFFFF: FFFFFFFFFFFFFFFFFFFFFFFF: FFFFFFFFFFFFFFFFFFFFFFFF  
FFFFFFFFFFFFFFFFFFFFFFF: FFFFFFFFFFFFFFFFFFFFF: FFFFFF: FFFFFFFFFFFFFFFFFFFFFFFFFFFFFF  
@A00155:342:HHGFNDSXY:1:1644:8278:7623 2:N:0:GAACCTAG+TCCGCATA  
ACTTACACGGTAGGTCGTGAACAAGCCC GGAGTACATCTCCTTTGGA ACTAGGAGACCCCTCCGGTCT  
TGTC AACCTCTGTTTC GGCAGAGGATACCGTGCTCCACAGCTGTAAGGCTGTGGGCCCGAGAGAAG  
+  
FFFFFFFFFFFFFFFFFFFFFFFFFFFFFFFFFFFFF: FFFFFFFFFFFFFFFFFFFFFFFF: FFFFFFFFFFFFFFFFFFFFFFFF  
FFFFFFFFFFF: FFFFFFFFFFFFFFFFFFFFFFFFFFFFFFFFFFFFFFFFFFFFFFFF: : FFFF: FFFFFFFFFFFFFFF:  
@A00155:342:HHGFNDSXY:1:1644:27832:20509 2:N:0:GAACCTAG+TCCGCATA  
GAAACCGTCGTTACTCTTCGAGTTGTGTAAGTTTCGTCCTAAAAAGGACTCGTCAGGTAGCCTACTAG  
ACTACGACTTACACGGTAGGTCGTGAACAAGCCC GGAGTACATCTCCTTTGGA ACTAGGAGACCCCTC  
+  
FFFFFFFFF: FFFFFFFFFFFFFFFFFFFFFFFFFFFFFF, : FFFFF: F: FF: FFFFFFFFFFFFFFFFFFFFFFFFFFFFFF  
FFFFFFFFFFFFFFFFFFFFFFFFFFFFFFFFFFFFF: FFFFFFFFFFFFFFFFFFFFFFFFFFFFFFFFFFFFFFFFFFFFFF  
@A00155:342:HHGFNDSXY:1:1644:3712:33379 2:N:0:GAACCTAG+TCCGCATA  
GTTGTGTAAGTTTCGTCCTAAAAGGACTCGTCAGGTAGCCTACTAGACTACGACTTACACGGTAGGT  
CGTGAACAAGCCC GGAGTACATCTCCTTTGGA ACTAGGAGACCCCTCCGGTCTTGTC AACCTCTGTT  
+  
FFFFFFFFFFFFFFFFFFFFFFFFFFFFFFFFFFFFF: FFFFFFFFFFFFFFFFFFFFFFFF: FFFFFFFFFFFFFFFFFFFFFFFF  
FFFFFFFFFFFFFFFFFFFFFFF: FFFFFFFFFFFFFFFFFFFFFFFFFFFFFFFFFFFFFFFFFFFFFF: FFFFFFFFFFFFFFFFFFFFFF  
@A00155:342:HHGFNDSXY:1:1644:10854:36417 2:N:0:GAACCTAG+TCCGCATA  
GTCCTAAAAGGACTCGTCAGGTAGCCTACTAGACTACGACTTACACGGTAGGTCGTGAACAAGCCC G  
GAGTACATCTCCTTTGGA ACTAGGAGACCCCTCCGGTCTTGTC AACCTCTGTTTC GGCAGAGGATAC  
+  
FFFFFFFFFFFFFFFFFFFFFFFFFFFFFFFFFFFFF: FFFFFFFFFFFFFFFFFFFFFFFF: FFFFFFFFFFFFFFFFFFFFFFFF  
FFFFFFFFFFFFFFFFFFFFFFF: FFFFFFFFFFFFFFFFFFFFFFFFFFFFFFFFFFFFFFFFFFFFFF: FFFFFFFFFFFFFFFFFFFFFF  
@A00155:342:HHGFNDSXY:1:1645:6271:5619 2:N:0:GAACCTAG+TCCGCATA  
ACTCAAAGAGTAACGACGGTTTTCGTCCTTGGAACG GACTCATCAGGGAGCCTACTAGACTCCGACCGT

CATGGGGGTTCAAACCCATGCCCCGCCACACCGCCTTAGATCAGCTGTGTCCACTTAAGGACTCACCT  
+  
FFFFFFFFFFFFFFFFFFFFFFFFFFFFFFFFFFFFFFFFFFFFFFFFFFFFFFFFFFFFFFFFFFFFFFFFFFFFFFFF, FFFFFFFFFF  
FFFFFFFFFFFFFFFFFFFFFFFFFFFFFFFFFFFFFFFFFFFFFFFFFFFFFFFFFFFFFFFFFFFFFFFFFFFFFFFF: FFFFFFFFFF: FFFF:  
@A00155:342:HHGFNDSXY:1:1645:12048:16971 2:N:0:GAACCTAG+TCCGCATA  
GGAGTACATCTCCTTTGGAAGTACGAGACCCCTCCGGTCTTGTCCAACCTCTGTTTCGGCAGAGGATA  
CCGTGCTCCACAGCTGTAAGGCTGTGGGCCCGAGAGAAGTCGCTCTCTCTCGCCCTCCACATCCCTCT  
+  
FFFFFFFFFFFFFFFFFFFFFFFFFFFFFFFFFFFFFFFFFFFFFFFFFFFFFFFFFFFFFFFFFFFFFFFFFFFFFFFF: FFFFFFFFFF: FFFF: FFFFF: FFFFF  
, FFFFFFFFFF, FFFFFFFFFF: F: FFFFFFFFFF, FFFFFFFFFFFFFFFFFF: FFFFFFFFFF: FF, FF  
@A00155:342:HHGFNDSXY:1:1645:18078:24471 2:N:0:GAACCTAG+TCCGCATA  
CGTCAGGTAGCCTACTAGACTACGACTTACACGGTAGGTCGTGAACAAGCCCGGAGTACATCTCCTTT  
GGAACCAGGAGACCCCTCCGGTCTTGTCCAACCTCTGTTTCGGCAGAGGATACCGTGCTCCACAGCTG  
+  
FFFFFFFFFFFFFFFFFFFFFFFFFFFFFFFFFFFFFFFFFFFFFFFFFFFFFFFFFFFFFFFFFFFFFFFFFFFFFFFF: FFFFFFFFFF  
FFF: FFFFFFFFFFFFFFFFFFFFFFFFFFFFFFFFFFFFFFFFFFFFFFFFFFFFFFFFFFFFFFFFFFFFFFFFFF: FFFFFFFFFF: FFFFFF  
@A00155:342:HHGFNDSXY:1:1646:11605:2895 2:N:0:GAACCTAG+TCCGCATA  
AGTACATCTCCTTTGGAAGTACGAGACCCCTCCGGTCTTGTCCAACCTCTGTTTCGGCAGAGGATACC  
GTGCTCCACAGCTGTAAGGCTGTGGGCCCGAGAGAAGTCGCTCTCTCTCGCCCTCTACATCCCTCTCG  
+  
FFFFFFFFFFFFFFFFFFFFFFFFFFFFFFFFFFFFFFFFFFFFFFFFFFFFFFFFFFFFFFFFFFFFFFFFFFFFFFFF: FFFFFFFFFF  
FFFFFFFFFFFFFFFFFFFFFFFFFFFFFFFFFFFFFFFFFFFFFFFFFFFFFFFFFFFFFFFFFFFFFFFFFFFFFFFF: FFFFFFFFFF  
@A00155:342:HHGFNDSXY:1:1646:24957:9142 2:N:0:GAACCTAG+TCCGCATA  
CTTCGAGTTGTGTAAGTTTCGTCCTAAAAAGGACTCGTCAGGTAGCCTACTAGACTACGACTTACAG  
GTAGGTCGTGAACAAGCCCGGAGTACATCTCCTTTGGAAGTACGAGACCCCTCCGGTCTTGTCCAACC  
+  
FFFFFFFFFFFFFFFFFFFFFFFFFFFFFFFFFFFFFFFFFFFFFFFFFFFFFFFFFFFFFFFFFFFFFFFFFFFFFFFF: FFFFFFFFFF  
FFFFFFFFFFFFFFFFFFFFFFFFFFFFFFFFFFFFFFFFFFFFFFFFFFFFFFFFFFFFFFFFFFFFFFFFFFFFFFFF: FFFFFFFFFF  
@A00155:342:HHGFNDSXY:1:1646:12635:23625 2:N:0:GAACCTAG+TCCGCATA  
TCCTAAAAAGGACTCGTCAGGTAGCCTACTAGACTACGACTTACACGGTAGGTCGTGAACAAGCCCGG  
AGTACATCTCCTTTGGAAGTACGAGACCCCTCCGGTCTTGTCCAACCTCTGTTTCGGCAGAGGATACC  
+  
FFF: FFFFFFFFFFFFFFFFFF: FFFFFFFFFFFFFFFFFFFFFFFFFFFFFFFFFFFFFFFFFFFFFFFFFFFFFFFFFF, FFFF  
FFFFFFFFFFFFFFFFFFFFFFFFFFFFFFFFFFFFFFFFFFFFFFFFFFFFFFFFFFFFFFFFFFFFFFFFFFFFFFFF  
@A00155:342:HHGFNDSXY:1:1647:32886:1924 2:N:0:GAACCTAG+TCCGCATA  
ACATCTCCTTTGGAAGTACGAGACCCCTCCGGTCTTGTCCAACCTCTGTTTCGGCAGAGGATGCCGTG  
CTCCACAGCTGTAAGGCTGTGGGCCCGAGAGAAGTCGCTCTCTCTCGCCCTCCACATCCCTCTCGGCA  
+  
FFFFFFFFF: : FFFFF: FFFFFFFFFFFFFFFFFFFFFFFFFFFFFFFFFFFFFFFFFFFFFFFFFFFFFFFFFF, FFFFFFFFFF  
FFFFFF: FFFF, FFFF, FFFFFFFFFFFFFFFFFFFFFFFFFFFFFFFFFF, FFFFFFFFF: FFFF, FFFFFFFFFF  
@A00155:342:HHGFNDSXY:1:1647:9462:35133 2:N:0:GAACCTAG+TCCGCATA  
TGTGTAAGTTTCGTCCTAAAAAGGACTCGTCAGGTAGCCTACTAGACTACGACTTACACGGTAGGTGCG  
TGAACAAGCCCGGAGTACATCTCCTTTGGAAGTACGAGACCCCTCCGGTCTTGTCCAACCTCTGTTTC  
+  
FFFFFFFFFFFFFFFFFFFFFFFFFFFFFFFFFFFFFFFFFFFFFFFFFFFFFFFFFFFFFFFFFFFFFFFFFFFFFFFF: F: FFFFFFFFFFFFFFFFFF  
FFFFFF: , FFF: FFFFFFFFFFFFFFFFFF: FFFFF: FFFFF: FFFFFFFFFFFFFFFFFF  
@A00155:342:HHGFNDSXY:1:1648:29206:31563 2:N:0:GAACCTAG+TCCGCATA  
ACGACTTACACGGTAGGTCGTGAACAAGCCCGGAGTACATCTCCTTTGGAAGTACGAGACCCCTCCGG  
TCTTGTCCAACCTCTGTTTCGGCAGAGGATACCGTGCTCCACAGCTGTAAGGCTGTGGGCCCGAGAGA  
+  
FFFFFFFFFFFFFFFFFFFFFFFFFFFFFFFFFFFFFFFFFFFFFFFFFFFFFFFFFFFFFFFFFFFFFFFFFFFFFFFF: FFFFFFFFFF  
FFFFFFFFFFFFFFFFFFFFFFFFFFFFFFFFFFFFFFFFFFFFFFFFFFFFFFFFFFFFFFFFFFFFFFFFFFFFFFFF: FFFFFFFFFF  
@A00155:342:HHGFNDSXY:1:1648:24695:32299 2:N:0:GAACCTAG+TCCGCATA  
CATCTCCTTTGGAAGTACGAGACCCCTCCGGTCTTGTCCAACCTCTGTTTCGGCAGAGGATACCGTGC

TCCACAGCTGTAAGGCTGTGGGCCCCGAGAGAAGTCGCTCTCTCTCGCCCTCCACATCCCTCTCGG  
+  
FFFFFFFFFFFFFFFFFFFFFFFFFFFFFFFFFFFFFFFFFFFFFFFFFFFFFFFFFFFFFFFFFFFFFFFF  
FFFFFFFFFFFFFFFFFFFFFFFFFFFFFFFFFFFFFFFFFFFFFFFFFFFFFFFFFFFFFFFFFFFFFFFF  
@A00155:342:HHGFNDSXY:1:1648:7627:34366 2:N:0:GAACCTAG+TCCGCATA  
ACACGGTAGGTCGTGAACAAGCCCGGAGTACATCTCCTTTGGAAGTACGAGACCCCTCCGGTCTTGTC  
CAACCTCTGTTTCGGCAGAGGATACCGTGCTCCACAGCTGTAAGGCTGTGGGCCCCGAGAGAAGTCGCT  
+  
FFFFFFFFFFFFFFFFFFFFFFFFFFFFFFFFFFFFFFFFFFFFFFFFFFFFFFFFFFFFFFFFFFFFFFFF  
FFFFFFFFFFFFFFFFFFFFFFFFFFFFFFFFFFFFFFFFFFFFFFFFFFFFFFFFFFFFFFFFFFFFFFFF  
@A00155:342:HHGFNDSXY:1:1648:17653:34632 2:N:0:GAACCTAG+TCCGCATA  
GTTTCGTCTCTAAAAGGACTCGTCAGGTAGCCTACTAGACTACGACTTACACGGTAGGTCGTGAACAA  
GCCCCGAGTACATCTCCTTTGGAAGTACGAGACCCCTCCGGTCTTGTCACACCTCTGTTTCGGCAGAG  
+  
FFFFFFFFFFFF:FFFFFFFFFFFFFFFFFFFFFFFFFFFFFFFFFFFFFFFFFFFFFFFFFFFFFFFFFFFF  
FFFFFFFFFFFFFFFFFFFFFFFFFFFFFFFFFFFFFFFFFFFFFFFFFFFFFFFFFFFFFFFFFFFFFFFF  
@A00155:342:HHGFNDSXY:1:1649:8703:21261 2:N:0:GAACCTAG+TCCGCATA  
AAAAGGACTCGTCAGGTAGCCTACTAGACTACGACTTACACGGTAGGTCGTGAACAAGCCCGGAGTAC  
ATCTCCTTTGGAAGTACGAGACCCCTCCGGTCTTGTCACACCTCTGTTTCGGCAGAGGATACCGTGCT  
+  
FFFFFFFFFFFFFFFFFFFFFFFFFFFFFFFFFFFFFFFFFFFFFFFFFFFFFFFFFFFFFFFFFFFFFFFF  
FFFFFFFFFFFFFFFFFFFFFFFFFFFFFFFFFFFFFFFFFFFFFFFFFFFFFFFFFFFFFFFFFFFFFFFF  
@A00155:342:HHGFNDSXY:1:1649:29939:24471 2:N:0:GAACCTAG+TCCGCATA  
AAGGACGAAACCGTCGTTACTCTTCGAGTTGTGTAAGTTTCGTCTCTAAAAGGACTCGTCAGGTAGCC  
TACTAGACTACGACTTACACGGTAGGTCGTGAACAAGCCCGGAGTACATCTCCTTTGGAAGTACGAGAG  
+  
F,FFFFFFFFFFFFFFFFFFFFFFFFFFFFFFFFFFFFFFFFFFFFFFFFFFFFFFFFFFFFFFFFFFFF  
FFFFFFFFFFFFFFFFFFFFFFFFFFFFFFFFFFFFFFFFFFFFFFFFFFFFFFFFFFFFFFFFFFFFFFFF  
@A00155:342:HHGFNDSXY:1:1650:18078:2581 2:N:0:GAACCTAG+TCCGCATA  
GTTGTGTAAGTTTCGTCTCTAAAAGGACTCGTCAGGTAGCCTACTAGACTACGACTTACACGGTAGGT  
CGTGAACAAGCCCGGAGTACATCTCCTTTGGAAGTACGAGACCCCTCCGGTCTTGTCACACCTCTGTT  
+  
FFFFFFFFFFFFFF:FFFFFFFFFFFFFFFFFFFFFFFFFFFFFFFFFFFFFFFFFFFFFFFFFFFFFFFF  
FFFFFFFFFFFFFFFFFFFFFFFFFFFFFFFFFFFFFFFFFFFFFFFFFFFFFFFFFFFFFFFFFFFFFFFF  
@A00155:342:HHGFNDSXY:1:1650:31702:26616 2:N:0:GAACCTAG+TCCGCATA  
GAACAAGCCCGGAGTACATCTCCTTTGGAAGTACGAGACCCCTCCGGTCTTGTCACACCTCTGTTTCG  
GCAGAGGATACCGTGCTCCACAGCTGTAAGGCTGTGGGCCCCGAGAGAAGTCGCTCTCTCTCGCC  
+  
FFFFFFFFFFFFFFFFFFFFFFFFFFFFFFFFFFFFFFFFFFFFFFFFFFFFFFFFFFFFFFFFFFFFFFFF  
FFFFFFFFFFFF:FFFFFFFFFFFFFFFFFFFFFFFFFFFFFFFFFFFFFFFFFFFFFFFFFFFFFFFFFFFF  
@A00155:342:HHGFNDSXY:1:1651:21468:26804 2:N:0:GAACCTAG+TCCGCATA  
GTGTAAGTTTCGTCTCTAAAAGGACTCGTCAGGTAGCCTACTAGACTACGACTTACACGGTAGGTCGT  
GAACAAGCCCGGAGTACATCTCCTTTGGAAGTACGAGACCCCTCCGGTCTTGTCACACCTCTGTTTCG  
+  
FFFFFFFFFFFFFFFFFFFFFFFFFFFFFFFFFFFFFFFFFFFFFFFFFFFFFFFFFFFFFFFFFFFFFFFF  
FFFFFFFFFFFFFFFFFFFFFFFFFFFFFFFFFFFFFFFFFFFFFFFFFFFFFFFFFFFFFFFFFFFFFFFF  
@A00155:342:HHGFNDSXY:1:1651:2329:30013 2:N:0:GAACCTAG+TCCGCATA  
CGGCAGAGGATACCGTGCTCCACAGCTGTAAGGCTGTGGGCCCCGAGAGAAGTCGCTCTCTCTCGCCCT  
TCACATCCCTCTCGGCATTGAGATGACCATAGGCCAGAGGTGAGTCCTTAAGTGGACACAGCTGATCT  
+  
FFFFFFFFFFFFFFFFFFFFFFFFFFFFFFFFFFFFFFFFFFFFFFFFFFFFFFFFFFFFFFFFFFFFFFFF  
FFFFFFFFFFFFFFFFFFFFFFFFFFFFFFFFFFFFFFFFFFFFFFFFFFFFFFFFFFFFFFFFFFFFFFFF  
@A00155:342:HHGFNDSXY:1:1651:32027:34914 2:N:0:GAACCTAG+TCCGCATA  
TCCTAAAAGGACTCGTCAGGTAGCCTACTAGACTACGACTTACACGGTAGGTCGTGAACAAGCCCGG

AGTACATCTCCTTTGGAAGTAGGAGACCCCTCCGGTCTTGTC AACCTCTGTTCG GCAGAGGATAACC  
+  
FFFFFFFFF:FFFFFFFFFFFFFFFFFFFFFFFFFFFFFFFFFFFFFFFFFFF:FFFFFFFFFFFFFFFFFFFFF  
FFFFFFFFFFFFFFFFFFFFFFFFFFFFFFFFFFFFFFFFFFFFFFFFFFFFFFFFF:FFFFFFFFFFFFFFFFFF:  
@A00155:342:HHGFNDSXY:1:1652:25735:5259 2:N:0:GAACCTAG+TCCGCATA  
AAAAGGACTCGTCAGGTAGCCTACTAGACTACGACTTACACGGTAGGTCGTGAACAAGCCCCGGAGTAC  
ATCTCCTTTGGAAGTAGGAGACCCCTCCGGTCTTGTC AACCTCTGTTCG GCAGAGGATAACCGTGCT  
+  
FFFFFFFFFFFFFFFFF:FFFFFFFFFFFFFFFFFFFFFFFFFFFFFFFFFFFFFFFFFFF:FFFFFFFFFFFFFFFFF  
FFFFFFFFFFFFFFFFFFFFFFFFFFFFFFFFFFFFFFFFFFFFFFFFFFFFFFFFF:FFFFFFFFFFFFFFFFF  
@A00155:342:HHGFNDSXY:1:1652:16080:9674 2:N:0:GAACCTAG+TCCGCATA  
TTTCGT CCTAAAAAGGACTCGTCAGGTAGCCTACTAGACTACGACTTACACGGTAGGTCGTGAACAAG  
CCCCGGAGTACATCTCCTTTGGAAGTAGGAGACCCCTCCGGTCTTGTC AACCTCTGTTCG GCAGAGG  
+  
F:FFFFFFFFFFF:FFFFFFFFFFFFFFFFFFFFFFFFFFFFFFFFFFFFFFFFFFF:FFFFFFFFFFFFFFFFF:FFFFFFFFFFF  
FFFFFFFFFFFFFFFFFFFFFFFFFFFFFFFFFFFFFFFFFFFFFFFFFFFFFFFFF:FFFF:FFFFFFFFFFFFFFFFFFFFFFFFFFFFFFFFF  
@A00155:342:HHGFNDSXY:1:1652:8748:16297 2:N:0:GAACCTAG+TCCGCATA  
GAACTAGGAGACCCCTCCGGTCTTGTC AACCTCTGTTCG GCAGAGGATAACCGTGCTCCACAGCTGT  
AAGGCTGTGGGCCCGAGAGAAGTCGCTCTCTCGCCCTCCACATCCCTCTCGGCATTGAGATGACCA  
+  
FFFFFFFFFFFFFFFFFFFFFFFFFFFFFFFFFFFFFFFFFFFFFFFFFFFFFFFFF:FFFFFFFFFFFFFFFFF:FFFFFFFFFFF:FFFFF  
FFFFFFFFFFFFFFFFFFFFFFFFFFFFFFFFFFFFFFFFFFFFFFFFFFFFFFFFF:FFFF:FFFFFFFFFFFFFFFFFFFFFFFFFFFFFFFFF  
@A00155:342:HHGFNDSXY:1:1652:19569:19601 2:N:0:GAACCTAG+TCCGCATA  
GCCTACTAGACTACGACTTACACGGTAGGTCGTGAACAAGCCCCGGAGTACATCTCCTTTGGAAGTAGG  
AGACCCCTCCGGTCTTGTC AACCTCTGTTCG GCAGAGGATAACCGTGCTCCACAGCTGTAAGGCTGT  
+  
FFFFFFFFFFFFFFFFFFFFFFFFFFFFFFFFFFFFFFFFFFFFFFFFFFFFFFFFF:FFFFFFFFFFF:FFFFFFFFF:FFFFF  
FFFF:FFFFFFFFFFFFFFFFFFFFFFFFFFFFFFFFFFFFFFFFFFFFFFFFF, FFFFF:FFFFFFFFFFFFFFFFF:FFFFF  
@A00155:342:HHGFNDSXY:1:1652:18539:32722 2:N:0:GAACCTAG+TCCGCATA  
GTGAACAAGCCCCGGAGTACATCTCCTTTGGAAGTAGGAGACCCCTCCGGTCTTGTC AACCTCTGTTC  
CGGCAGAGGATAACCGTGCTCCACAGCTGTAAGGCTGTGGGCCCGAGAGAAGTCGCTCTCTCTCGCCCT  
+  
FFFFFFFFFFFFFFFFFFFFFFFFFFFFFFFFFFFFFFFFFFFFFFFFFFFFFFFFF:FFFFFFFFFFFFFFFFF  
FFFFFFFFFFF, FFFFFFFFFFFFFFFFFFFFFFFFFFFFFFFFFFFFFFFFFFFFFF, FFFFFFFFFFFFFFFFFFFFFFFFFF  
@A00155:342:HHGFNDSXY:1:1653:15139:7451 2:N:0:GAACCTAG+TCCGCATA  
GAACAAGCCCCGGAGTACATCTCCTTTGGAAGTAGGAGACCCCTCCGGTCTTGTC AACCTCTGTTCG  
GCAGAGGATAACCGTGCTCCACAGCTGTAAGGCTGTGGGCCCGAGAGAAGTCGCTCTCTCTCGCC  
+  
FFFFFFFFFFFFFFFFFFFFFFFFFFFFFFFFFFFFFFFFFFFFFFFFFFFFFFFFF:F:FFFFFFFFFFFFFFFFFFFFF  
FFFFFFFFFFFFFFFFFFFFFFFFFFFFFFFFFFFFFFFFFFFFFFFFFFFFFFFFF:FFFFFFFFFFFFFFFFFFFFFFFFFFFFFFFFF  
@A00155:342:HHGFNDSXY:1:1653:31060:24189 2:N:0:GAACCTAG+TCCGCATA  
AGCCCCGGAGTACATCTCCTTTGGAAGTAGGAGACCCCTCCGGTCTTGTC AACCTCTGTTCG GCAG  
GATAACCGTGCTCCACAGCTGTAAGGCTGTGGGCCCGAGAGAAGTCGCTCTCTCTCGCCCTCCACATC  
+  
FFFFFFFFFFFFFFFFFFFFFFFFFFFFFFFFFFFFFFFFFFFFFFFFFFFFFFFFF.:FFFFFFFFFFFFFFFFF:FFFFFFFFFFF  
FFFFFFFFF:FFFFF, FFFFFFFFFFFFFFFFFF:FFFFFFFFFFFFFFFFF:FFFFFFFFFFFFFFFFFFFFFFFFFFFFFFFFF  
@A00155:342:HHGFNDSXY:1:1653:20645:27821 2:N:0:GAACCTAG+TCCGCATA  
GTACATCTCCTTTGGAAGTAGGAGACCCCTCCGGTCTTGTC AACCTCTGTTCG GCAGAGGATAACCG  
TGCTCCACAGCTGTAAGGCTGTGGGCCCGAGAGAAGTTGCTCTCTCTCGCCCTCCACATCCCTCTCGG  
+  
FFFFFFFFFFFFFFFFFFFFFFFFFFFFFFFFFFFFFFFFFFFFFFFFFFFFFFFFF:FFFFFFFFFFFFFFFFF, FFF  
FFFFFFFFFFFFFFFFF:FFFFFFFFFFFFFFFFFFFFFFFFFFFFFFFFFFFFFFFFFFFFFFFFF  
@A00155:342:HHGFNDSXY:1:1653:21377:32377 2:N:0:GAACCTAG+TCCGCATA  
GTACATCTCCTTTGGAAGTAGGAGACCCCTCCGGTCTTGTC AACCTCTGTTCG GCAGAGGATAACCG



TGCTCCACAGCTGTAAGGCTGTGGGCCCCGAGAGAAGTCGCTCTCTCTCGCCCTCCACATCCCTCTCGG  
+  
FFFFFFFFFFFF,FFFFFFFFFFFFFFFFFFFFFFFF:F:,FFFFFFFFFFFF:FFFFFFFFFFFFFFFFFFFF  
FFFFFFFFFFFFFFFFFFFFFFFFFFFFFFFF:FFFFFFFFFFFFFFFF:FFFFFFFFFFFFFFFFFFFFF:  
@A00155:342:HHGFNDSXY:1:1654:4065:2769 2:N:0:GAACCTAG+TCCGCATA  
ACCCCTCCGGTCTTGTCCAACCTCTGTTTCGGCAGAGGATACCGTGCTCCACAGCTGTAAGGCTGTGG  
GCCCGAGAGAAGTCGCTCTCTCTCGCCCTCCACATCCCTCTCGGCATTGAGATGACCATAGGCCAGAG  
+  
FFFFFFFFFFFFFFFFFFFFFFFF,FFFFFFF:FFFFFFFFFFFFFFFFFFFFFFFFFFFFFFFFFFFFF  
FFFFFFF:FF:,FFFFFFFFFFFFFFFFFFFFFFFF:FF:FFFFFFFFFFFFFFFFFFFFFFFF:FF:FFFFF  
@A00155:342:HHGFNDSXY:1:1654:14733:6527 2:N:0:GAACCTAG+TCCGCATA  
TAGGAGACCCCTCCGGTCTTGTCCAACCTCTGTTTCGGCAGAGGATACCGTGCTCCACAGCTGTAAGG  
CTGTGGGCCCCGAGAGAAGTCGCTCTCTCTCGCCCTCCACATCCCTCTCGGCATTGAGATGACCATAGG  
+  
FFFFFFFFFFFFFFFFFFFFFFFFFFFFFFFF:FFFFFFFFFFFFFFFFFFFFFFFFFFFFFFFFFFFFF  
FFFFFFFFFFFFFFFFFFFFFFFFFFFFFFFFFFFFFFFFFFFFFFFFFFFFFFFFFFFFFFFF:FF:FFFFFFFF:FF  
@A00155:342:HHGFNDSXY:1:1654:21721:11209 2:N:0:GAACCTAG+TCCGCATA  
GTAGGTCGTGAACAAGCCCGGAGTACATCTCCTTTGGAAGTAGGAGACCCCTCCGGTCTTGTCCAACC  
TCTGTTTCGGCAGAGGATACCGTGCTCCACAGCTGTAAGGCTGTGGGCCCCGAGAGAAGTCGCTCTCTC  
+  
FFFFF:FFFFFFFFFFFFFFFFFFFFFFFFFFFFFFFFFFFFFFFF:FFFFFFFFFFFF:FFFFFFFFF  
FFFFFFFFFFFFFFFF:FFFFFFFFFFFFFFFFFFFFFFFFFFFFFFFFFFFFFFFFFFFFFFFFFFFFFFFFF  
@A00155:342:HHGFNDSXY:1:1654:21685:12430 2:N:0:GAACCTAG+TCCGCATA  
GTAGGTCGTGAACAAGCCCGGAGTACATCTCCTTTGGAAGTAGGAGACCCCTCCGGTCTTGTCCAACC  
TCTGTTTCGGCAGAGGATACCGTGCTCCACAGCTGTAAGGCTGTGGGCCCCGAGAGAAGTCGCTCTCTC  
+  
FFFFFFFFFFFFFFFFFFFFFFFFFFFFFFFFFFFFFFFFFFFFFFFFFFFFFFFF:FFFFFFFFFFFFFFFFFFFF  
FFFFFFFFF:FFFFFFFFFFFFFFFFFFFFFFFFFFFFFFFFFFFFFFFFFFFFFFFFFFFFFFFFFFFFFFFFF  
@A00155:342:HHGFNDSXY:1:1654:5737:21324 2:N:0:GAACCTAG+TCCGCATA  
TCTTCGAGTTGTGTAAGTTTCGTCTCTAAAAAGGACTCGTCAGGTAGCCTACTAGACTACGACTTACAC  
GGTAGGTCGTGAACAAGCCCGGAGTACATCTCCTTTGGAAGTAGGAGACCCCTCCGGTCTTGTCCAAC  
+  
FF,FFFFF,FFFFFFFFFFFF:FFFFFFFFFFFFFFFFFFFFFFFFFFFFFFFF:FFFFFFFFFFFFFFFFFFFF  
FFFFFFFFFFFFFFFF:FFFFFFFFFFFFFFFFFFFFFFFFFFFFFFFF:FFFFFFFFFFFFFFFFFFFF: :FFFFFFFFF  
@A00155:342:HHGFNDSXY:1:1654:4580:22388 2:N:0:GAACCTAG+TCCGCATA  
AAAAAGGACTCGTCAGGTAGCCTACTAGACTACGACTTACACGGTAGGTCGTGAACAAGCCCGGAGTA  
CATCTCCTTTGGAAGTAGGAGACCCCTCCGGTCTTGTCCAACCTCTGTTTCGGCAGAGGATACCGTGC  
+  
FFFFF:FFFFFFFFFFFFFFFF:FFFFFFFFF:FFFFFFFFFFFFFFFFFFFFFFFFFFFFFFFFFFFFF:FFF:FFFF  
:FFFFFFFFFFFF:FFFFFFFFFFFF:FFFFFFFFFFFFFFFFFFFFFFFFFFFFFFFFFFFFFFFFFFFFF:FFFFFFFFF  
@A00155:342:HHGFNDSXY:1:1655:14570:6872 2:N:0:GAACCTAG+TCCGCATA  
TTACACGGTAGGTCGTGAACAAGCCCGGAGTACATCTCCTTTGGAAGTAGGAGACCCCTCCGGTCTTG  
TCCAACCTCTGTTTCGGCAGAGGATACCGTGCTCCACAGCTGTAAGGCTGTGGGCCCCGAGAGAAGTCG  
+  
FFFFFFFFFFFFFFFFFFFFFFFFFFFFFFFFFFFFFFFFFFFFFFFFFFFFFFFF,FFFFFFFFF:FFFFFFFFFFFF  
:FFFFFFFFFFFFFFFFFFFFFFFFFFFFFFFFFFFFFFFFFFFFFFFFFFFFFFFFFFFFFFFFFFFFFFFFF  
@A00155:342:HHGFNDSXY:1:1655:8495:19116 2:N:0:GAACCTAG+TCCGCATA  
AAGGACGAAACCGTCGTTACTCTTTGAGTTGTGTAAGTTTCGTCTCTAAAAAGGACTCGTCAGGTAGCC  
TACTAGACTACGACTTACACGGTAGGTCGTGAACAAGCCCGGAGTACATCTCCTTTGGAAGTAGGAGA  
+  
FFFFFFFFFFFFFFFFFFFFFFFFFFFFFFFFFFFFFFFFFFFFFFFFFFFFFFFF,FFFFFFFFFFFF:FFFFFFFFF  
FFFFFFFFFFFFFFFFFFFFFFFFFFFFFFFFFFFFFFFF:FFFFFFFFFFFFFFFFFFFFFFFFFFFFF:FFFFFFFFF  
@A00155:342:HHGFNDSXY:1:1656:6759:11224 2:N:0:GAACCTAG+TCCGCATA  
TTTCGTCCTAAAAAGGACTCGTCAGGTAGCCTACTAGACTACGACTTACACGGTAGGTCGTGAACAAG

CCCGGAGTACATCTCCTTTGGAACCAGGAGACCCCTCCGGTCTTGTCCAACCTCTGTTTCGGCAGAGG  
+  
F:FFFF:FFFFFFFF:FFFFFFFFFFFFFFFF,FFFFFFFFFFFFFFFF::,FFF:FFFFFFFFFFFFFFFF  
FFF::FFFFFFFF:FFFFFFFF:FF,,FFFFFFFF:F:,FFFF,F::FFF,FFF:FFFF,F:FFFF  
@A00155:342:HHGFNDSXY:1:1656:15980:22091 2:N:0:GAACCTAG+TCCGCATA  
GTCCTAAAAAGGACTCGTCAGGTAGCCTACTAGACTACGACTTACACGGTAGGTCGTGAACAAGCCCG  
GAGTACATCTCCTTTGGAAGTACTAGGAGACCCCTCCGGTCTTGTCCAACCTCTGTTTCGGCAGAGGATAC  
+  
FFFFFFFFF:FFFFFFFFFFFFFFFF:FFF:FFFFFFFFFFFFFFFF:FFFFF:FFFFFFFFFFFFFFFF  
:FFFFF,FF:FFFFFFFF:F:FF:FFFFFFFF:FFFFFFFFFFFFFFFF:FF,FFFFFFFFFFFFF  
@A00155:342:HHGFNDSXY:1:1656:21178:24142 2:N:0:GAACCTAG+TCCGCATA  
ACGGTAGGTCGTGAACAAGCCCGGAGTACATCTCCTTTGGAACCAGGAGACCCCTCCGGTCTTGTCCA  
ACCTCTGTTTCGGCAGAGGATACCGTGCTCCACAGCTGTAAGGCTGTGGGCCCCGAGAGAAGTCGCTCT  
+  
FFFFFFFFF:FFFFFFFFFFFFFFFFFFFFFFFFFFFFFFFFFFFFFFFFFFFFFFFFFFFFFFFFFFFFF  
FFFFFFFFF:FFFFFFFFFFFFFFFFFFFFFFFFFFFFFFFFFFFFFFFFFFFFFFFFFFFFFFFFFFFFF  
@A00155:342:HHGFNDSXY:1:1656:19913:28369 2:N:0:GAACCTAG+TCCGCATA  
GTTTCGTCCTAAAAAGGACTCGTCAGGTAGCCTACTAGACTACGACTTACACGGTAGGTCGTGAACAA  
GCCCGGAGTACATCTCCTTTGGAAGTACTAGGAGACCCCTCCGGTCTTGTCCAACCTCTGTTTCGGCAGAG  
+  
FFFFFFFFFFFFFFFFFFFFFFFFFFFFFFFFFFFFFFFFFFFFFFFFFFFFFFFFFFFFFFFFFFFFF:FFFFFFFF:FFFFFFFF:FFFFF:FF  
:FFFFFFFFFFFFFFFFFFFF:FFFFFFFFF::FFFFFFFFFFFFFFFFFFFFFFFFFFFFFFFFFFFFF:FFFFFFFF  
@A00155:342:HHGFNDSXY:1:1656:27299:30326 2:N:0:GAACCTAG+TCCGCATA  
ACTTACACGGTAGGTCGTGAACAAGCCCGGAGTACATCTCCTTTGGAAGTACTAGGAGACCCCTCCGGTCT  
TGTCCAACCTCTGTTTCGGCAGAGGATACCGTGCTCCACAGCTGTAAGGCTGTGGGCCCCGAGAGAAG  
+  
::FFFFF:F::FFF:FFFFFFFFF:FF:FFFFFFFFF:FFF:F:FFFFF,FFFFFFFFFFFF::FFFF  
FFFFF,FF,F,F::FFF:FFFFF,FFFFFFFFF,FFFFFFFFF,F,F:FFFFFFFFF:FFFFF  
@A00155:342:HHGFNDSXY:1:1657:10782:7607 2:N:0:GAACCTAG+TCCGCATA  
GTGAACAAGCCCGGAGTACATCTCCTTTGGAAGTACTAGGAGACCCCTCCGGTCTTGTCCAACCTCTGTTT  
CGGCAGAGGATACCGTGCTCCACAGCTGTAAGGCTGTGGGCCCCGAGAGAAGTCGCTCTCTCTCGCCCT  
+  
F::FFFFF:FFFF:F:FFFF:FFFFFFFF:FFFFFFFFFFFFFFFF:FFFF:,F,FFFFFFFF:FFFF::F  
FFFFFFFF:FFFFF:FFFFFFFFFFFFF,FFFFFFFF:FFFFFFFFFFFFFFFFFFFFFFFFFFFFF  
@A00155:342:HHGFNDSXY:1:1657:20464:12853 2:N:0:GAACCTAG+TCCGCATA  
GAGAGAGCGACTTCTCTC  
+  
FFFFFFFFFFFFFFFFFFFFF  
@A00155:342:HHGFNDSXY:1:1657:3387:19977 2:N:0:GAACCTAG+TCCGCATA  
GACCCCTCCGGTCTTGTCCAACCTCTGTTTCGGCAGAGGATACCGTGCTCCACAGCTGTAAGGCTGTG  
GGCCCCGAGAGAAGTCGCTCTCTCTCGCCCTCCACATCCCTCTCGGCATTGAGATGACCATAGGC  
+  
FFFFFFFFFFFFFFFFFFFFFFFFFFFFFFFF:FFFFFFFFFFFFFFFF,FFFFFFFFFFFFFFFF:FFFFF  
FFFFFFFFFFFFFFFFFFFFFFFFFFFFFFFFFFFFFFFFFFFFFFFF,FFF:FFF,,FFFFFFFFF:FFFF  
@A00155:342:HHGFNDSXY:1:1658:29731:17848 2:N:0:GAACCTAG+TCCGCATA  
ACCGTGCTCCACAGCTGTAAGGCTGTGGGCCCCGAGAGAAGTCGCTCTCTCTCGCCCTTCACATCCCTC  
TCGGCATTGAGATGACCATAGGCCAGAGGTGAGTCCTTAAGTGGACACAGCTGATCTAAGGCGGTGTG  
+  
FFFFFFFFFFFFFFFFFFFFFFFFFFFFFFFFFFFFFFFFFFFFFFFFFFFFFFFFFFFFFFFFFFFFF  
FFFFF::FFFFFFFFF:FFFFFFFFFFFFFFFFFFFFFFFFFFFFFFFF:FFFFFFFFFFFFFFFFFFFFF  
@A00155:342:HHGFNDSXY:1:1659:7383:7232 2:N:0:GAACCTAG+TCCGCATA  
ACTTACACGGTAGGTCGTGAACAAGCCCGGAGTACATCTCCTTTGGAAGTACTAGGAGACCCCTCCGGTCT  
TGTCCAACCTCTGTTTCGGCAGAGGATACCGTGCTCCACAGCTGTAAGGCTGTGGGCCCCGAGAGAAGT  
+

FFFFFFFFFFFF:FF:FFFFFFFFFFFFFFFFFFFFFFFFFFFFFFFFFFFFFFFFFFFFFFFFFFFFFFF:FFFFFFFFFFFF:FF:FF  
 FFFFFFFFFFFFFFFFFFFFFFFFFFFFFFFFFFFFFFFFFFFFFFFFFFFFFFFFFFFFFFFFFFFFFF:FFFFFFFFFFFF:FF:FF  
 @A00155:342:HHGFNDSXY:1:1659:13458:18537 2:N:0:GAACCTAG+TCCGCATA  
 TTACACGGTAGGTCGTGAACAAGCCCCGAGTACATCTCCTTTGGAAGTACTAGAGACCCCCTCCGGTCTTG  
 TCCAACCTCTGTTTTCGGCAGAGGATACCGTGCTCCACAGCTGTAAGGCTGTGGGCCCGAGAGAAGTCTG  
 +  
 FFFFFFFFFFFFFFFFFFFFFFFFFFFFFFFFFFFFFFFFFFFFFFFFFFFFFFFFFFFFFFFFFFFFFF:FFFFFFFF:FFF  
 FFFFFFFFFFFFFFFFFFFFFFFFFFFFFFFFFFFFFFFFFFFFFFFFFFFFFFFFFFFFFFFFFFFFFF,FFFFFFFFFFFFFFFFFFFFFFFF  
 @A00155:342:HHGFNDSXY:1:1660:10574:19429 2:N:0:GAACCTAG+TCCGCATA  
 GAGACCCCCTCCGGTCTTGTTCAACCTCTGTTTCGGCAGAGGATACCGTGCTCCACAGCTGTAAGGCTGT  
 TGGGCCCGAGAGAAGTCGCTCTCTCTCGCCCTCTACATCCCTCTCGGCATTGAGATGACCATAGGCCA  
 +  
 FFFFFFFFFFFFFFFFFFFFFFFFFFFFFF:FFFFFFFFFFFFFFFFFFFF:FFFFFFFFFFFFFFFFFFFFFFFFFFFFFFFFFFFF  
 FFFFFFFFFFFFFFFFFFFFFFFFFFFFFFFFFFFFFFFFFFFFFFFFFFFFFFFFFFFFFFFFFFFFFF:FFFFFFFF:F::FFFFF:  
 @A00155:342:HHGFNDSXY:1:1660:10999:20102 2:N:0:GAACCTAG+TCCGCATA  
 GAGACCCCCTCCGGTCTTGTTCAACCTCTGTTTCGGCAGAGGATACCGTGCTCCACAGCTGTAAGGCTGT  
 TGGGCCCGAGAGAAGTCGCTCTCTCTCGCCCTCTACATCCCTCTCGGCATTGAGATGACCATAGGCCA  
 +  
 FFFFF:FFFFFFFF:FFFFFFFFFFFFFFFFFFFF:FFFFFFFFFFFF:FFFFFFFFFFFFFFFFFFFFFFFF,FFFF:FFFF  
 FFFFFFFFFFFFFFFFFFFFFFFFFFFFFFFFFFFFFFFFFFFFFFFFFFFFFFFFFFFFFFFFFFFFFF:FFFFFFFFFFFFFFFFFFFF,FFFF  
 @A00155:342:HHGFNDSXY:1:1661:24849:8296 2:N:0:GAACCTAG+TCCGCATA  
 TAGACTACGACTTACACGGTAGGTCGTGAACAAGCCCCGAGTACATCTCCTTTGGAAGTACTAGAGACCC  
 CTCCGGTCTTGTTCAACCTCTGTTTCGGCAGAGGATACCGTGCTCCACAGCTGTAAGGCTGTGGGCC  
 +  
 FFFFFFFFFFFFFFFFFFFFFFFFFFFFFFFFFFFFFFFFFFFFFFFFFFFFFFFFFFFFFFFFFFFFFF  
 FFFFFFFFFFFFFFFFFFFFFFFFFFFFFFFFFFFFFFFFFFFFFFFFFFFFFFFFFFFFFFFFFFFFFF  
 @A00155:342:HHGFNDSXY:1:1661:18376:17065 2:N:0:GAACCTAG+TCCGCATA  
 AACTAGGAGACCCCCTCCGGTCTTGTTCAACCTCTGTTTCGGCAGAGGATACCGTGCTCCACAGCTGTA  
 AGGCTGTGGGCCCGAGAGAAGTCGCTCTCTCTCGCCCTCCACATCCCTCTCGGCATTGAGATGACCAT  
 +  
 FFFF:FFFFFFFFFFFFFFFFFFFFFFFFFFFFFFFFFFFFFFFFFFFFFFFFFFFFFFFFFFFFFFFFFFFFF  
 FFFFFFFFFFFFFFFFFFFFFFFFFFFFFFFFFFFFFF:FFFFFFFFFFFFFFFFFFFFFFFFFFFFFFFFFFFFFFFFFFFFF  
 @A00155:342:HHGFNDSXY:1:1661:22453:20807 2:N:0:GAACCTAG+TCCGCATA  
 GTTGTGTAAGTTTCGTCTAAAGGACTCGTCAGGTAGCCTACTAGACTACGACTTACACGGTAGGT  
 CGTGAACAAGCCCCGAGTACATCTCCTTTGGAAGTACTAGAGACCCCCTCCGGTCTTGTTCAACCTCTGTT  
 +  
 FFFFFFFFFFFFF::FFF:FFFFFFFFFFFFFFFFFFFFFFFFFFFFFFFFFFFFFFFFFFFFFFFFFFFFF  
 FFFFFFFFFF:FFFFFFFFF:FFFFFFFFFFFFFFFFFFFFFFFFFFFF:FFFFFFFFFFFFFFFF,FFFFFFFFFFFFFF:  
 @A00155:342:HHGFNDSXY:1:1661:13304:28322 2:N:0:GAACCTAG+TCCGCATA  
 TACGACTTACACGGTAGGTCGTGAACAAGCCCCGAGTACATCTCCTTTGGAACCAGGAGACCCCCTCCG  
 GTCTTGTTCAACCTCTGTTTCGGCAGAGGATACCGTGCTCCACAGCTGTAAGGCTGTGGGCCCG  
 +  
 FFFF:FFFFFFFFFFFFFFFFFFFFFFFFFFFFFFFFFFFFFFFFFFFFFFFFFFFFFFFFFFFFFFFFFFFFF:FFFFF:FFFFF  
 FFFFFFFFFFFFFFFFFFFFFFFFFFFFFFFFFFFFFFFFFFFFFFFFFFFFFFFFFFFFFFFFFFFFFF  
 @A00155:342:HHGFNDSXY:1:1663:6180:4867 2:N:0:GAACCTAG+TCCGCATA  
 TAACGACGGTTTCGTCTTGGAACGGACTIONCATCAGGGAGCCTACTAGACTCCGACCGTCATGGGGGTT  
 CAAACCCATGCCCGCCACACCGCCTTAGATCAGCTGTGTCCACTIONAAGGACTCACCTCTGGCCGATG  
 +  
 FFFFFFFFFF:FFFFFFFFFFFFF,FFFFFFFF:FFFFFFFFFFFFFFFFFFFF,FFFFFFFFFFFFFFFFFFFFFFFFFFFFF  
 FFF:FFFFF:FFFFF:FFFFFFFFFFFFFFFFFFFFFFFFFFFFFFFFFFFFFFFFFFFFFFFFFFFFF,FFF  
 @A00155:342:HHGFNDSXY:1:1663:11831:13150 2:N:0:GAACCTAG+TCCGCATA  
 ACTACGACTTACACGGTAGGTCGTGAACAAGCCCCGAGTACATCTCCTTTGGAAGTACTAGAGACCCCCTC  
 CGGTCTTGTTCAACCTCTGTTTCGGCAGAGGATACCGTGCTCCACAGCTGTAAGGCTGTGGGCCCGAG  
 +

```
FFFFFFFFFFF:FFFFFFFFFFFFFFFFFFFFFFFFFFFFFFFFFFFFFFFFFFFFFFFFFFFFFFFFFFFF:F  

FFFFF:FFFFFFFFFFFFFFFFFFFFFFFFFFFFFFFFFFFFFFFFFFFFFFFFFFFFFFFFFFFFFFFFFFFFF  

@A00155:342:HHGFNDSXY:1:1664:30364:34194 2:N:0:GAACCTAG+TCCGCATA  

CCCCTCCGGTCTTGCCAACCTCTGTTTCGGCAGAGGATACCGTGCTCCACAGCTGTAAGGCTGTGGG  

CCCCGAGAGAAGTCGCTCTCTCTCGCCCTTCACATCCCTCTCGGCATTGAGATGACCATAGGCCAGAG  

+  

FFFFFFFFFFFFFFFFFFFFFFFFFFFFFFFFFFFFFFFFFFFFFFFFFFFFFFFFFFFFFFFFFFFFF:FFF,FFFFF  

FFFFFFFFF,FFFFF,FFFFFFFFFFFFFFFFFFFFFFFFFFFFFFFFFFFFFFFFFFFFFFFFFFFFFFFFF:  

@A00155:342:HHGFNDSXY:1:1664:26323:36558 2:N:0:GAACCTAG+TCCGCATA  

TAGGACGAAACTTACACAACCTCGAAGAGTAACGACGGTTTTGTCCTTGGAACGGACTCATCAGGGAGC  

CTACTAGACTCCGACCGTCATGGGGGTTCAAACCCATGCCCCGCCACACCGCCTTAGATCAGCG  

+  

FFFFFFFFF:FFFFFFFFFFFFFFFFFFFFFFFFFFFFFFFFFFFFFFFFFFFFFFFFFFFFFFFFFFFFF,  

FFFFF:FFFFFFFFFFFFFFFFFFFF,FF:FFFFFFFFFFFFFFFFFFFFFFFFFFFFFFFFFFFFFFFFFFFFF  

@A00155:342:HHGFNDSXY:1:1665:18521:1313 2:N:0:GAACCTAG+TCCGCATA  

CGGTCTTGCCAACCTCTGTTTCGGCAGAGGATACCGTGCTCCACAGCTGTAAGGCTGTGGGCCCGAG  

AGAAGTCGCTCTCTCTCGCCCTCCACATCCCTCTCGGCATTGAGATGACCATAGGCCAG  

+  

FFFFF:FFFFFFFFFFFFFFFFFFFFFFFFFFFFFFFFFFFFFFFFFFFFFFFFFFFFFFFFFFFFF  

FFFFFFFFFFFFFFFFFFFFFFFFFFFFFFFFFFFFFFFFFFFFFFFFFFFFFFFFFFFFFFFFFFFFF,:FFFFF  

@A00155:342:HHGFNDSXY:1:1665:22607:37043 2:N:0:GAACCTAG+TCCGCATA  

CGGTAGGTCGTGAACAAGCCCGGAGTACATCTCCTTTGGAACCAGGAGACCCCTCCGGTCTTGTC  

CCTCTGTTTCGGCAGAGGATACCGTGCTCCACAGCTGTAAGGCTGTGGGCCCGAGAGAAGTCGCTCTC  

+  

FFF:FFFFFFFFFFFFFFFFFFFFFFFFFFFFFFFFFFFFFFFFFFFFFFFFFFFFFFFFFFFFFFFFFFFFF  

FFFFFFFFFFFFF,FFFFFFFFFFFFFFFFFFFFFFFFFFFFFFFFFFFFFFFFFFFFFFFFFFFFFFFFFFFFF:  

@A00155:342:HHGFNDSXY:1:1666:27914:4022 2:N:0:GAACCTAG+TCCGCATA  

GAACTAGGAGACCCCTCCGGTCTTGCCAACCTCTGTTTCGGCAGAGGATATCGTGCTCCACAGCTGT  

AAGGCTGTGGGCCCGAGAGAAGTCGCTCTCTCTCGCCCTCCACATCCCTCTCGGCATTGAGATGACCA  

+  

FFFFFFFFFFFFFFFFFFFFFFFFFFFFFFFFFFFFFFFFFFFFFFFFFFFFFFFFFFFFFFFFFFFFF  

FFFFFFFFFFFFFFFFFFFFFFFFFFFFFFFFFFFFFFFFFFFFFFFFFFFFFFFFFFFFFFFFFFFFF:FFFFFFFFFFF  

@A00155:342:HHGFNDSXY:1:1666:6253:10441 2:N:0:GAACCTAG+TCCGCATA  

ACTCTTCGAGTTGTTTAAAGTTTCGTCTAAAAAGGACTCGTCAGGTAGCCTACTAGACTACGACTTAC  

ACGGTAGGTCGTGAACAAGCCCGGAGTACATCTCCTTTGGAAGTAGGAGACCCCTCCGGTCTTGTC  

+  

FFF,FFFF,FFFFF:FFF:FFFFFFFFF:FFFFFFFFFFFFFFFFF,FFFFFFFFFFFFFFFFFFFFFFFFFFFFF  

FFFFFFFFFFFFFFFFFFFF,F,FF:,FFF:FFFFFFFFFFFFFFFFFFFFFFFFFFFFFFFFFFFFF:FFFFFFFFFF  

@A00155:342:HHGFNDSXY:1:1666:17363:19038 2:N:0:GAACCTAG+TCCGCATA  

CACGGTAGGTCGTGAACAAGCCCGGAGTACATCTCCTTTGGAAGTAGGAGACCCCTCCGGTCTTGTC  

AACCTCTGTTTCGGCAGAGGATACCGTGCTCCACAGCTGTAAGGCTGTGGGCCCGAGAGAAGTCGCTC  

+  

FFFFFFFFFFFFFFFFFFFFFFFFFFFFFFFFFFFFFFFFFFFFFFFFFFFFFFFFFFFFFFFFFFFFF::FFFFF  

FFFFFFFFFFFFFFFFFFFFFFFFFFFFFFFFFFFFFFFFFFFFFFFFFFFFFFFFFFFFFFFFFFFFF:FFFFFFFFFF  

@A00155:342:HHGFNDSXY:1:1667:6126:1799 2:N:0:GAACCTAG+TCCGCATA  

GGACTCGTCAGGTAGCCTACTAGACTACGACTTACACGGTAGGTCGTGAACAAGCCCGGAGTACATCT  

CCTTTGGAACCAGGAGACCCCTCCGGTCTTGTC AACCTCTGTTTCGGCAGAGGATACCGTGCTCCAC  

+  

FFFFFFFFFFFFFFFFFFFFFFFFFFFFFFFFFFFFF:FFFFFFFFFFFFFFFFFFFFFFFFFFFFFFFFFFFFF  

FFFFFFFFFFFFFFFFFFFFFFFFFFFFFFFFFFFFF:FFFFFFFFFFFFFFFFFFFFFFFFFFFFFFFFFFFFF  

@A00155:342:HHGFNDSXY:1:1667:3477:30467 2:N:0:GAACCTAG+TCCGCATA  

ACTTACACGGTAGGTCGTGAACAAGCCCGGAGTACATCTCCTTTGGAAGTAGGAGACCCCTCCGGTCT  

TGTCCAACCTATGTTTCGGCAGAGGATACCGTGCTCCACAGCTGTAAGGCTGTGGGCCCGAGAGAAGT
```

FFFFFFFFFFFFFFFFFFFFFFFFFFFFFFFFFFFFFFFFFFFFFFFFFFFFFFFFFFFFFFFFFFFFFFFF  
FFFFFFFFFFFFFFFFFFFFFFFFFFFFFFFFFFFFFFFFFFFFFFFFFFFFFFFFFFFFFFFFFFFFFFFF,FFFFFFFFFFFFFFFFFFFFFFFF  
@A00155:342:HHGFNDSXY:1:1668:26530:3004 2:N:0:GAACCTAG+TCCGCATA  
CGT TACTCTTCGAGTTGTGTAAGTTTCGTCCTAAAAAGGACTCGTCAGGTAGCCTACTAGACTACGAC  
TTACACGGTAGGTCGTGAACAAGCCCGGAGTACATCTCCTTTGGAAGTAGGAGACCCCTCCGGTCTTG  
+  
FFFFFFFF:FFFFFFFFFFFFFFFFFFFFFFFFFFFFFFFFFFFFFFFFFFFFFFFFFFFFFFFFFFFFFFFF  
FFFFFFFFFFFFFFFFFFFFFFFFFFFFFFFFFFFFFFFFFFFFFFFFFFFFFFFFFFFFFFFFFFFFFFFF:FFFFFFFF  
@A00155:342:HHGFNDSXY:1:1668:24632:16250 2:N:0:GAACCTAG+TCCGCATA  
TACGACTTACACGGTAGGTCGTGAACAAGCCCGGAGTACATCTCCTTTGGAAGTAGGAGACCCCTCCG  
GTCTTGTCCAACCTCTGTTTCGGCAGAGGATACCGTGCTCCACAGCTGTAAGGCTGTGGGCCCG  
+  
FFFFFFFFFFFFFFFFFFFFFFFFFFFFFFFFFFFFFFFFFFFFFFFFFFFFFFFFFFFFFFFFFFFFFFFF:FFFFFFFFFFFFFFFFFFFFFFFF:FFFFFFFF  
FFFFF:FFFFFFFFFFFFFFFFFFFFFFFFFFFFFFFFFFFFFFFFFFFFFFFFFFFFFFFFFFFFFFFF:FFFFFFFF:FFFFFFFF  
@A00155:342:HHGFNDSXY:1:1668:18466:16752 2:N:0:GAACCTAG+TCCGCATA  
GAACTAGGAGACCCCTCCGGTCTTGTCCAACCTCTGTTTCGGCAGAGGATACCGTGCTCCACAGCTGT  
AAGGCTGTGGGCCCGAGAGAAGTCGCTCTCTCTCGCCCTCCACATCCCTCTCGGCATAGAGATGACCA  
+  
FFFFFFFFFFFFFFFFFFFFFFFFFFFFFFFFFFFFFFFFFFFFFFFFFFFFFFFFFFFFFFFFFFFFFFFF  
FFFFFFFFFFFFFFFFFFFFFFFFFFFFFFFFFFFFFFFFFFFFFFFFFFFFFFFFFFFFFFFFFFFFFFFF  
@A00155:342:HHGFNDSXY:1:1668:13584:18067 2:N:0:GAACCTAG+TCCGCATA  
GAACTAGGAGACCCCTCCGGTCTTGTCCAACCTCTGTTTCGGCAGAGGATACCGTGCTCCACAGCTGT  
AAGGCTGTGGGCCCGAGAGAAGTCGCTCTCTCTCGCCCTCCACATCCCTCTCGGCATTG  
+  
FFFFFFFFFFFFFFFFFFFFFFFFFFFFFFFFFFFFFFFFFFFFFFFFFFFFFFFFFFFFFFFFFFFFFFFF  
FFFFFFFFFFFFFFFFFFFFFFFFFFFFFFFFFFFFFFFFFFFFFFFFFFFFFFFFFFFFFFFFFFFFFFFF  
@A00155:342:HHGFNDSXY:1:1668:13648:18082 2:N:0:GAACCTAG+TCCGCATA  
GAACTAGGAGACCCCTCCGGTCTTGTCCAACCTCTGTTTCGGCAGAGGATACCGTGCTCCACAGCTGT  
AAGGCTGTGGGCCCGAGAGAAGTCGCTCTCTCTCGCCCTCCACATCCCTCTCGGCATTG  
+  
FFFFFFFFFFFFFFFFFFFFFFFFFFFFFFFFFFFFFFFFFFFFFFFFFFFFFFFFFFFFFFFFFFFFFFFF  
FFFFFFFFFFFFFFFFFFFFFFFFFFFFFFFFFFFFFFFFFFFFFFFFFFFFFFFFFFFFFFFFFFFFFFFF  
@A00155:342:HHGFNDSXY:1:1668:11758:19664 2:N:0:GAACCTAG+TCCGCATA  
GAACTAGGAGACCCCTCCGGTCTTGTCCAACCTCTGTTTCGGCAGAGGATACCGTGCTCCACAGCTGT  
AAGGCTGTGGGCCCGAGAGAAGTCGCTCTCTCTCGCCCTCCACATCCCTCTCGGCATTG  
+  
FFFFFFFFFFFFFFFFFFFFFFFFFFFFFFFFFFFFFFFFFFFFFFFFFFFFFFFFFFFFFFFFFFFFFFFF:FFFFF  
FFFFFFFFFFFFFFFFFFFFFFFFFFFFFFFFFFFFFFFFFFFFFFFFFFFFFFFFFFFFFFFFFFFFFFFF  
@A00155:342:HHGFNDSXY:1:1668:3106:28197 2:N:0:GAACCTAG+TCCGCATA  
AAGGACTCGTCAGGTAGCCTACTAGACTACGACTTACACGGTAGGTCGTGAACAAGCCCGGAGTACAT  
CTCCTTTGGAAGTAGGAGACCCCTCCGGTCTTGTCCAACCTCTGTTTCGGCAGAGGATACCGTGCTCC  
+  
FFFFFFFFFFFFFFFFFFFFFFFFFFFFFFFFFFFFFFFFFFFFFFFFFFFFFFFFFFFFFFFFFFFFFFFF:FFFFFFFFFF:F  
FFFFFFFFFF:FFFF:FFFFFFFFFFFFFFFFFFFFFFFFFFFFFFFFFFFFFFFFFFFFFFFFFFFFFFFF:FFFF:FF,FF,FFFFFFFF  
@A00155:342:HHGFNDSXY:1:1669:29776:10723 2:N:0:GAACCTAG+TCCGCATA  
GGACTCGTCAGGTAGCCTACTAGACTACGACTTACACGGTAGGTCGTGAACAAGCCCGGAGTACATCT  
CCTTTGGAACCAGGAGACCCCTCCGGTCTTGTCCAACCTCTGTTTCGGCAGAGGATACCGTGCTCCAC  
+  
FFFFFFFFFFFFFFFFFFFFFFFFFFFFFFFFFFFFFFFFFFFFFFFFFFFFFFFFFFFFFFFFFFFFFFFF,FFFFFFFFFFFFFFFF  
FFFFFFFFFFFFFFFFFFFFFFFFFFFFFFFFFFFFFFFFFFFFFFFFFFFFFFFFFFFFFFFFFFFFFFFF  
@A00155:342:HHGFNDSXY:1:1669:30960:21825 2:N:0:GAACCTAG+TCCGCATA  
GGTAGCCTACTAGACTACGACTTACACGGTAGGTCGTGAACAAGCCCGGAGTACATCTCCTTTGGAAC  
TAGGAGACCCCTCCGGTCTTGTCCAACCTCTGTTTCGGCAGAGGATACCGTGCTCCACAGCTGTAAGG  
+

FFFFFFFFFFFFFFFFFFFFFFFFFFFFFFFFFFFFFFFFFFFFFFFFFFFFFFFFFFFFFFFFFFFFFFFF  
FFFFFFFFFFFFFFFFFFFFFFFFFFFFFFFFFFFFFFFFFFFFFFFFFFFFFFFFFFFFFFFFFFFFFFFF  
@A00155:342:HHGFNDSXY:1:1669:19714:22106 2:N:0:GAACCTAG+TCCGCATA  
TACATCTCCTTTGGAAGTACGAGACCCCTCCGGTCTTGTCCAACCTCTGTTTCGGCAGAGGATACCGT  
GCTCCACAGCTGTAAGGCTGTGGGCCCGAGAGAAGTCGCTCTCTCTCGCCCTCCACATCCCTCTCGGC  
+  
FFFFFFFFFFFFFFFF,FFFFFFFFFFFFFFFF,FFFFFFFFFFFFFF:F,FFFFFFFFFFFFFF:FFFF  
FFFFFFFFFFFFFFFFFFFFFFFFFFFFFFFFFFFFFFFFFFFFFFFFFFFFFFFFFFFFFFFFFFFFFF,FFFF  
@A00155:342:HHGFNDSXY:1:1669:30165:24361 2:N:0:GAACCTAG+TCCGCATA  
GGTAGCCTACTAGACTACGACTTACACGGTAGGTCGTGAACAAGCCCGGAGTACATCTCCTTTGGAAC  
TAGGAGACCCCTCCGGTCTTGTCCAACCTCTGTTTCGGCAGAGGATACCGTGCTCCACAGCTGTAAGG  
+  
FFFFFFFFFFFFFFFF:FFFFFFFFFFFFFFFFFFFFFFFFFFFFFFFFFFFFFFFFFFFFFFFFFFFFFFF  
FFFFFFFFFFFFFFFFFFFFFFFFFFFFFFFFFFFFFFFF:FFFFFF:FFFFFFFF:FFFFFFFFFFFFFFF  
@A00155:342:HHGFNDSXY:1:1669:27733:29888 2:N:0:GAACCTAG+TCCGCATA  
TGAACAAGCCCGGAGTACATCTCCTTTGGAAGTACGAGACCCCTCCGGTCTTGTCCAACCTCTGTTTC  
GGCAGAGGATACCGTGCTCCACAGCTGTAAGGCTGTGGGCCCGAGAGAAGTCGCTCTCTCTCGCCCTC  
+  
FF:FFFF,FFF,FFFFFFFFFFFF:F,FFFF,,F:FF:FF:FFFFFFFF:FFFFFFFFFF:FFFF:FF::  
F,FF:FF:FFFF,FFFF:FFF:FFF:FFFF:FFFFFFFF:FFFFFFFFFFFF:FFFF:FFFFFFFF:FFFF  
@A00155:342:HHGFNDSXY:1:1670:28546:23249 2:N:0:GAACCTAG+TCCGCATA  
GTGTAAGTTTCGTCCTAAAAAGGACTCGTCAGGTAGCCTACTAGACTACGACTTACACGGTAGGTCGT  
GAACAAGCCCGGAGTACATCTCCTTTGGAAGTACGAGACCCCTCCGGTCTTGTCCAACCTCTGTTTCG  
+  
FFFFFFFFFFFF:FFFFFFFFFFFFFFFFFFFFFFFFFFFFFFFFFFFFFFFFFFFFFFFFFFFFFFFFFFFF  
FFFFFFFFFFFFFFFFFFFF:FFFF:FFFFFFFFFFFFFFFFFFFFFFFFFFFFFFFFFFFFFFFFFFFFFFF  
@A00155:342:HHGFNDSXY:1:1670:12373:24893 2:N:0:GAACCTAG+TCCGCATA  
TACGACTTACACGGTAGGTCGTGAACAAGCCCGGAGTACATCTCCTTTGGAAGTACGAGACCCCTCCG  
GTCTTGTCCAACCTCTGTTTCGGCAGAGGATACCGTGCTCCACAGCTGTAAGGCTGTGGGCCCG  
+  
FFFFFFFFFFFFFFFFFFFFFFFFFFFFFFFFFFFFFFFFFFFFFFFFFFFFFFFFFFFFFFFFFFFFFFFF  
FFFFFFFFFFFFFFFFFFFFFFFFFFFFFFFFFFFFFFFFFFFFFFFFFFFFFFFFFFFFFFFFFFFFFFFF  
@A00155:342:HHGFNDSXY:1:1671:9878:2973 2:N:0:GAACCTAG+TCCGCATA  
ACTTACACGGTAGGTCGTGAACAAGCCCGGAGTACATCTCCTTTGGAAGTACGAGACCCCTCCGGTCT  
TGTCCAACCTCTGTTTCGGCAGAGGATACCGTGCTCCACAGCTGTAAGGCTGTGGGCCCGAGAGAAGT  
+  
FFFFFFFFFFFFFFFFFFFFFFFFFFFFFFFFFFFFFFFFFFFFFFFFFFFFFFFFFFFFFFFFFFFFFFFF  
FFFFFF:FFFFFFFFFFFFFFFFFFFFFFFFFFFFFFFFFFFFFFFFFFFFFFFFFFFFFFFFFFFFFFFF  
@A00155:342:HHGFNDSXY:1:1671:3549:5165 2:N:0:GAACCTAG+TCCGCATA  
CGTCCTAAAAAGGACTCGTCAGGTAGCCTACTAGACTACGACTTACACGGTAGGTCGTGAACAAGCCC  
GGAGTACATCTCCTTTGGAAGTACGAGACCCCTCCGGTCTTGTCCAACCTCTGTTTCGGCAGAGGATA  
+  
FFFFFFFFFFFFFF:FFFF:FFF,FFFFFF:FFFFFFFFFFFFFFFFFFFFFFFF:FFFFFFFFFFFFFFF:  
F:FFFFFFFF:F:FFFFFFFF:FFFF:FFFF,FF:FFF:FF,,FFFFFFFF:FFFFFFFFFFFFFFF  
@A00155:342:HHGFNDSXY:1:1671:3712:5916 2:N:0:GAACCTAG+TCCGCATA  
CGTCCTAAAAAGGACTCGTCAGGTAGCCTACTAGACTACGACTTACACGGTAGGTCGTGAACAAGCCC  
GGAGTACATCTCCTTTGGAAGTACGAGACCCCTCCGGTCTTGTCCAACCTCTGTTTCGGCAGAGGAT  
+  
:FFFFFFFFFFFFFFFFFFFFFF,FFFFFF,:FFFFFFFFFFFFFFFFFFFFFFFFFFFFFFFF:F:,FF  
FFFFFFFFFFFFFFFF::FFFFFFFFFFFFFFFFFFFFFF,F:FFFFFFFF:FFFFFFFFFFFF  
@A00155:342:HHGFNDSXY:1:1671:7482:13448 2:N:0:GAACCTAG+TCCGCATA  
GGACTCGTCAGGTAGCCTACTAGACTACGACTTACACGGTAGGTCGTGAACAAGCCCGGAGTACATCT  
CCTTTGGAAGTACGAGACCCCTCCGGTCTTGTCCAACCTCTGTTTCGGCAGAGGATACCGTGCTCCAC  
+

```
FFFFFFFFFFFFFFFFFFFFFFFFFFFFFFFFFFFFFFFFFFFFFFFFFFFFFFFFFFFFFFFFFFFFF:,FFFFFFFFFFFFFFF  
FFFFFFFFFFFFFFFFFFFFFFFFFFFFFFFFFFFFFFFFFFFFFFFFFFFFFFFFFFFFFFFFFFFFF@A00155:342:HHGFNDSXY:1:1671:22489:17707 2:N:0:GAACCTAG+TCCGCATA  
CCGGTCTTGTTCCAACCTCTGTTTTCGGCAGAGGATACCGTGCTCCACAGCTGTAAAGGCTGTGGGCCCGA  
GAGAAGTCGCTCTCTCTCGCCCTCCACATCCCTCTCGGCATTGAGATGACCATAGGCCGGAG  
+  
FFFFFFFFFFFFFFFFFFFFFFFFFFFFFFFFFFFFFFFFFFFFFFFFFFFFFFFFFFFFFFFFFFFF:FFFFFFFFFFFFFFFFFFFFFFFF  
FFFF:FFFFFFFFFFFFFFFFFFFFFFFFFFFFFFFFFFFFFFFFFFFFFFFFFFFFFFFFFFFFF:FFFFFFFF  
@A00155:342:HHGFNDSXY:1:1671:15383:20932 2:N:0:GAACCTAG+TCCGCATA  
TACATCTCCTTTGGAAGTAGGAGACCCCTCCGGTCTTGTTCCAACCTCTGTTTCGGCAGAGGATACCGT  
GCTCCACAGCTGTAAAGGCTGTGGGCCCGAGAGAAGTCGCTCTCTCTCGCCCTCCACATCCCTCTCGGC  
+  
FFFFFFFFFF:FFFFF::FFFFFFFFFFFFFFFFFFFFFFF,FFFFFFFFFFFFFFFFFFFFFFFFFFFFFFFFFFFFFFFF  
FFFFFFFFFFF:F,FFFFFFFFFFFFFFFFFFFFFFFFFFFFFFFFFFFFFFFFFFFFFFFFFFFFFFFFFFFFF:FFFFFFFF  
@A00155:342:HHGFNDSXY:1:1671:14850:30874 2:N:0:GAACCTAG+TCCGCATA  
TACCGTGCTCCACAGCTGTAAAGGCTGTGGGCCCGAGAGAAGTCGCTCTCTCTCGCCCTCCACATCCCT  
CTCGGCATTGAGATGACCATAGGCCAGAGGTGAGTCCTTAAGTGGACACAGCTGATCTAAGGCGGG  
+  
FFFFFFFFFFFFFFFFFFFFFFFFFFFFFFFFFFFFFFFFFFFFFFFFFFFFFFFFFFFFFFFFFFFF:F,FFFFFFFFFFFFFFFFFFFFF:FFFFF  
FFFFFFF,,FFFFFFFFF:FFFFFFFFFFFFFFFFFFFFFFFFFFFFF:FF:FFF:FFF,FF,FF:FFFFFFFFFFFFF  
@A00155:342:HHGFNDSXY:1:1671:17002:33724 2:N:0:GAACCTAG+TCCGCATA  
GGAGTACATCTCCTTTGGAAGTAGGAGACCCCTCCGGTCTTGTTCCAACCTCTGTTACGGCAGAGGATA  
CCGTGCTCCACAGCTGTAAAGGCTGTGGGCCCGAGAGAAGTCGCTCTCTCTCGCCCTCCACATCCCTCT  
+  
FFFFFFFFFFFFFFFFFFFFFFFFFFFFFFFFFFFFFFFFFFFFFFFFFFFFFFFFFFFFFFFFFFFF:FFFFFFFFFFFFFFFFFFFFF:FFFFFFFF  
FFFFFFFFFFFFFFFFFFFFFFFFFFFFFFFFFFFFFFFFFFFFFFFFFFFFFFFFFFFFFFFFFFFFF:FFFFFFFFFFFFFFFFFFFFF  
@A00155:342:HHGFNDSXY:1:1671:3115:35352 2:N:0:GAACCTAG+TCCGCATA  
AGCCCCGAGTACATCTCCTTTGGAAGTAGGAGACCCCTCCGGTCTTGTTCCAACCTCTGTTTCGGCAGA  
GGATACCGTGCTCCACAGCTGTAAAGGCTGTGGGCCCGCGAGAAGTCGCTCTCTCTCGCCC  
+  
FFFFFFFFFFFFFFFFFFFFFFFFFFFFFFFFFFFFF:FF:FFFFFFFFFFFFFFFFFFFFFFFFF,FFFFFFFFFFFFFFFFFFFFFFFFFFFF:  
FFFFFFFFFFFFFFFFFFFFFFFFFFFFFFFFFFFFFFFFFFFFFFFFFFFFFFFFFFFFF,FFFFFF:FFFFFFFFFFFFFFFFF:F  
@A00155:342:HHGFNDSXY:1:1672:14498:13322 2:N:0:GAACCTAG+TCCGCATA  
ACTCTTCGAGTTGTTTAAGTTTCGTCTAAAAAGGACTCGTCAGGTAGCCTACTAGACTACGACTTAC  
ACGGTAGGTCGTGAACAAGCCCGAGTACATCTCCTTTGGAAGTAGGAGACCCCTCCGGTCTTGTTCA  
+  
FFFF:FFFFF:FFFFFFFFF:FFFFFFFFFFFFFFFFFFFFFFFFFFFFFFFFFFFFFFFFFFFFF:FFFFFFFFFFFFF  
FFFFFFFFFFFFFFFFFFFFFFFFFFFFFFFFFFFFF:FFFFFFFFFFFFFFFFFFFFFFFFFFFFFFFFFFFFF,FFFFFF  
@A00155:342:HHGFNDSXY:1:1672:20148:14465 2:N:0:GAACCTAG+TCCGCATA  
CGGCAGAGGATACCGTGCTCCACAGCTGTAAAGGCTGTGGGCCCGAGAGAAGTCGCTCTCTCTCGCCCT  
CTACATCCCTCTCGGCATTGAGATGACCATAGGCCAGAGGTGAGTCCTTAAGTGGACACAGCTGATCT  
+  
FFFFFFFFFFFFFFFFFFFFFFFFFFFFFFFFFFFFF:FFFFFFFFF:FFFFFFFFFFFFFFFFFFFFFFFFFFFFFFFFFFFFF:FFFF  
FFFFFFFFFFFFFFFFFFFFF:FFFFFFFFFFFFFFFFFFFFF:FFFFFFFFFFFFFFFFFFFFFFFFFFFFFFFFFFFFF  
@A00155:342:HHGFNDSXY:1:1672:31204:18302 2:N:0:GAACCTAG+TCCGCATA  
GGACTCGTCAGGTAGCCTACTAGACTACGACTTACACGGTAGGTCGTGAACAAGCCCGGAGTACATCT  
CCTTTGGAACCAGGAGACCCCTCCGGTCTTGTTCCAACCTCTGTTTCGGCAGAGGATACCGTGCTCCAC  
+  
FFFFFFFFFFFFFFFFFFFFFFFFFFFFFFFFFFFFF:FFFFFFFFFFFFFFFFFFFFFFFFFFFFFFFFFFFFF:FFFFFFFFFFFFF  
FFFFFFFFFFFFFFFFFFFFFFFFFFFFFFFFFFFFFFFFFFFFFFFFFFFFFFFFFFFFFFFFFFFFF  
@A00155:342:HHGFNDSXY:1:1672:29704:20275 2:N:0:GAACCTAG+TCCGCATA  
TCCAAGGACGAAACCGTCGTTACTCTTCGAGTTGTGTAAGTTTCGTCTAAAAGGACTCGTCAGGTA  
GCCTACTAGACTACGACTTACACGGTAGGTCGTGAACAAGCCCGGAGTACATCTCCTTTGGAATA
```

```
FFF
FFF,FFFFFFFFFFFFFFFFFFFFFFFFFFFFF:FFF,F:FFFFFFFFF:FFFFFFFFFF
@A00155:342:HHGFNDSXY:1:1672:25229:32878 2:N:0:GAACCTAG+TCCGCATA
GAGTAACGACGGTTTCGTCTTGGAACGGAATCATCAGGAAGCCTACTAGACTCCGACCGTCATGGGG
GTTCAAACCCATGCCCGCCACACCGCCTTAGATCAGCTGTGTCCACTTAAGGACTCACCTCTGGCCT
+
FFFFFFFFFFFFFFFFFFFFFFFFFFFFF:FFFFFFFFFFFFFFFFFFFFFFFFFFFFFFFFF
FFFFFF:FFFFFFFFFFFFFFFFFFFF,FFF,FFFFFFFFFFFFFFFFFFFFFFFFFFFFFFFFF
@A00155:342:HHGFNDSXY:1:1672:2971:33254 2:N:0:GAACCTAG+TCCGCATA
TTTCGTCTTGGAACGGAATCATCAGGAAGCCTACTAGACTCCGACCGTCATGGGGGTTCAAACCCAT
GCCCGCCACACCGCCTTAGATCAGCTGTGTCCACTTAAGGACTCACCTCTGGCCTATGGTCATCT
+
FFFFFFFFFFFFFFFFFFFFFFFFFFFFF:FFFFFFFFFFFFFFFFFFFFFFFFFFFFFFFFF:
FFFFFFFFFFFFFFFFFFFFFFFFFFFF:FFFFFF,:FF,FFFFFFFFFFFFFFFFFFFFFFFFFFFF
@A00155:342:HHGFNDSXY:1:1672:9390:35790 2:N:0:GAACCTAG+TCCGCATA
CTACGACTTACACGGTAGGTCGTGAACAAGCCCGAGTACATCTCCTTTGGAAGTACGAGACCCTCC
GGTCTTGCCAACCTCTGTTTCGGCAGAGGATACCGTGCTCCACAGCTGTAAGGCTGTGGGCCGAGA
+
FFFFFFFFFFFFFFFFFFFFFFFFFFFFF:FFFFFFFFFFFFFFFFFFFFFFFFFFFFFFFFF
FFFFFFFFFFFFFFFFFFFFFFFFFFFFF:FFFFFFFFFFFFFFFFFFFFFFFFFFFFFFFFF
@A00155:342:HHGFNDSXY:1:1673:9326:4460 2:N:0:GAACCTAG+TCCGCATA
AAGCCCGGAGTACATCTCCTTTGGAAGTACGAGACCCTCCGGTCTTGCCAACCTCTGTTTCGGCAG
AGGATACCGTGCTCCACAGCTGTAAGGCTGTGGGCCGAGAGAAGTCGCTCTCTCGCCCTCTACAT
+
FFFFFFF:FF:FFFFFF::FFFF,F:FFFF:FFFFFFFFF:FFFFFFFFFFFFFFFFF:FFFF:F
FFFFFFFFFFFFFFFFF,FFFFFF,,FFFFFFFFF:FFFFFF,,FFFF,FFFFFFFFF:FFFFFFF
@A00155:342:HHGFNDSXY:1:1673:18710:4930 2:N:0:GAACCTAG+TCCGCATA
GAACAAGCCCGGAGTACATCTCCTTTGGAAGTACGAGACCCTCCGGTCTTGCCAACCTCTGTTTCG
GCAGAGGATACCGTGCTCCACAGCTGTAAGGCTGTGGGCCGAGAGAAGTCGCTCTCTCGCCCTCC
+
F:FFFFFFFFFFFFFFFFFFFFFFFFFFFFFFFFFFFFFFFFFFFFFFFFFFFFFFFFF:FFFFFFFFFFFFFFFFF
FFFFFFFFFFFFFFFFFFFFFFFFFFFFFFFFFFFFFFFFFFFFFFFFFFFFFFFFFFFFFFFFF
@A00155:342:HHGFNDSXY:1:1673:32524:4993 2:N:0:GAACCTAG+TCCGCATA
CAAGGACGAAACCGTCGTTACTCTTTGAGTTGTGTAAGTTTCGTCTAAAAAGGACTCGTCAGGTAGC
CTACTAGACTACGACTTACACGGTAGGTCGTGAACAAGCCCGGAGTACATCTCCTTTGGAAGTACGAG
+
FFFFF,FFFFFFFFF::FFFF,FF,FFFFFFFFFFFFF::FFF,:FFF,:FFFFFFFFFFFFF::FF
FFFFF,FFFFFFFFF:FFFFFFFFFFFFFFFFFFFFFFFFFFFFF,FF::FF:FF:FFFFFFFFF,F,FFFFF
@A00155:342:HHGFNDSXY:1:1673:25238:6370 2:N:0:GAACCTAG+TCCGCATA
GAAGTCTGTCAGGTAGCCTACTAGACTACGACTTACACGGTAGGTCGTGAACAAGCCCGGAGTACATCT
CCTTTGGAAGTACGAGACCCTCCGGTCTTGCCAACCTCTGTTTCGGCAGAGGATACCGTGCTCCAC
+
FFFFFFFFFFFFF,FFFFFFFFFFFFF:FFFFFFFFFFFFFFFFFFFFFFFFFFFFFFFFF:FFFFFFFFFFFFFFFFF:
FFFFFFFFF:FFFFFFFFFFFFFFFFFFFFFFFFFFFF:FFFFFFFFFFFFFFFFFFFFFFFFF:FFFFFFFFF
@A00155:342:HHGFNDSXY:1:1673:7048:31391 2:N:0:GAACCTAG+TCCGCATA
GTTGTGTAAGTTTCGTCTAAAAAGGACTCGTCAGGTAGCCTACTAGACTACGACTTACACGGTAGGT
CGTGAACAAGCCCGGAGTACATCTCCTTTGGAAGTACGAGACCCTCCGGTCTTGCCAACCTCTGTT
+
FF:FFFFFFFFFFFFFFFFFFFFFFFFFFFFFFFFFFFFFFFFFFFFFFFFFFFF,FF:FFFF:FFFF:FFFF:FFF
FFFFFFFFFFFFFFFFFFFFFFFFFFFF:FFFF:FF:FFFFFFFFFFFFF,FF:FFF:FF:FF:FFFFFFFFF
@A00155:342:HHGFNDSXY:1:1674:7455:5635 2:N:0:GAACCTAG+TCCGCATA
GACGAAACCGTCGTTACTCTACGAGTTGTGTAAGTTTCGTCTAAAAAGGACTCGTCAGGTAGCCTAC
TAGACTACGACTTACACGGTAGGTCGTGAACAAGCCCGGAGTACATCTCCTTTGGAAGTACGAGACC
```



F:FFFFFFFFFFFFFFFFFFFFFFFFFFFFFFFFFFFFFFFFFFFFFFFFFFFFFFFFFFFFF,FFFFFFFFFFFF,FFFFFFFFFFFFFF:FFFFFFFFFFFF,FFFFFFFFFFFF  
F:FFFFFFFFFFFF:FFFFFFFFFF,FFFFFFFFFFFFFFF:FF:FF:FF:FFFFFFFFF,:FFF:FFFFFFFFFFFFF  
@A00155:342:HHGFNDSXY:1:1674:25545:8375 2:N:0:GAACCTAG+TCCGCATA  
AGGACGAAACCGTCGTACTCTTCGAGTTGTGTAAGTTTTCGTCCTAAAAAGGACTCGTCAGGTAGACT  
ACTAGACTACGACTTACACGGTAGGTCTGAACAAGCCCCGGAGTACATCTCCTTTGGAAGTAggagac  
+  
FFFFFFFFFFFFFFFFFFFFFFFFFFFFFFFFFFFFFFFFFFFFFFFFFFFFFFFFFFFFFFFF:FFFFFFFF  
FFF:FFFFFFFFFFFFFFFFFFFFFFFFFFFFFFFFFFFFFFFFFFFFFFFFFFFFFFFFFFFF:FFFFFFFFFFFFFFFF  
@A00155:342:HHGFNDSXY:1:1674:29098:10488 2:N:0:GAACCTAG+TCCGCATA  
TAGGACGAAACTTACACAACCTCGAAGAGTAACGACGGTTTTCGTCCTTGGAACGGACTCATCAGGGAGC  
CTACTAGACTCCGACCCTCATGGGGTTCAAACCCATGCCCGCTACACCGCCTTAGATCAGCTGTGT  
+  
FFFFFFFFFFFFFFFFFFFFFFFFFFFFFFFFFFFFFFFFFFFFFFFFFFFFFFFFFFFFFFFFFFFFFFFF  
FFFFFFFFFFFFFFFFFFFFFFFFFFFFFFFFFFFFFFFFFFFFFFFFFFFFFFFFFFFFFFFF:FFFFFFFFFFFFFFFF:FFFF  
@A00155:342:HHGFNDSXY:1:1674:23990:26099 2:N:0:GAACCTAG+TCCGCATA  
ACCCCTCCGGTCTTGTCCAACCTCTGTTTCGGCAGAGGATACCGTGCTCCACAGCTGTAAGGCTGTGG  
GCCCGAGAGAAGTCGCTCTCTCTCGCCCTCTACATCCCTCTCGGCATTGAGATGACCAT  
+  
FFFFFFFFFFFFFFF,FFFFFFFFFFFFFFFFFFFFFFFFFFFFFFFFFFFFFFFFFFFFFFFFFFFFFFFF,F  
FFFFFFFFFFFFFFFFFFFFFFFFFFFFFFFFFFFFFFFFFFFFFFFFFFFFFFFFFFFF:FFFFFFFFFFFFFFF,FFFF  
@A00155:342:HHGFNDSXY:1:1674:25084:26490 2:N:0:GAACCTAG+TCCGCATA  
TACGACTTACACGGTAGGTCTGAACAAGCCCCGGAGTACATCTCCTTTGGAAGTAggagaccctccg  
GTCTTGTCCAACCTCTGTTTCGGCAGAGGATACCGTGCTCCACAGCTGTAAGGCTGTGGGCCCG  
+  
FFFFFFFFFFFFFFFFFFFFFFFFFFFFFFFFFFFFFFFFFFFFFFFFFFFFFFFFFFFFFFFF:FFFFFFFFFFFFFFFF  
FFF,FFFFF:FFFFFFFFFFFFFFFFFFFFFFFF:FFFFFFFFFFFFFFFF:FFFFFFFFFFFFFFFFFFFF  
@A00155:342:HHGFNDSXY:1:1674:15691:26663 2:N:0:GAACCTAG+TCCGCATA  
TACGACTTACACGGTAGGTCTGAACAAGCCCCGGAGTACATCTCCTTTGGAAGTAggagaccctccg  
GTCTTGTCCAACCTCTGTTTCGGCAGAGGATACCGTGCTCCACAGCTGTAAGGCTGTGGGCCCG  
+  
FFFFFFFFFFFFFFFFFFFFFFFFFFFFFFFFFFFFFFFFFFFFFFFFFFFFFFFFFFFFFFFFFFFFFFFF  
FFFFFFFFFFFFFFFFFFFFFFFFFFFFFFFFFFFFFFFFFFFFFFFFFFFFFFFFFFFFFFFFFFFFFFFF  
@A00155:342:HHGFNDSXY:1:1674:22652:29763 2:N:0:GAACCTAG+TCCGCATA  
CCCCTCCGGTCTTGTCCAACCTCTGTTTCGGCAGAGGATACCGTGCTCCACAGCTGTAAGGCTGTGG  
CCCGAGAGAAGTCGCTCTCTCTCGCCCTTCACATCCCTCTCGGCATTGAGATGACCATAGGCCAG  
+  
F:FFFFFFFFFFFFFFF:FFFFFFFFFFFFFFF:FFFFFFF::FFFFFFFFFFFFFFF::FFFFFFFFFFFFFFF:  
FFFFFFFFFFFFFFFFFFFFFFFFFFFFFFFFFFFFFFFFFFFFFFFFFFFFFFFFFFFF:FFFFFFFFFFFF,,FFFFFFF  
@A00155:342:HHGFNDSXY:1:1674:7600:31219 2:N:0:GAACCTAG+TCCGCATA  
GGAGTACATCTCCTTTGGAAGTAggagaccctccggTCTTGTCCAACCTCTGTTTCGGCAGAGGATA  
CCGTGCTCCACAGCTGTAAGGCTGTGGGCCCGAGAGAAGTCGCTCTCTCTCGCCCTCCACATCCCTCT  
+  
FFFFFFFFFFFFFFFFFFFFFFFFFFFFFFFFFFFFFFFFFFFFFFFFFFFFFFFFFFFFFFFFFFFFFFFF  
FFFFFFFFFFFFFFFFFFFFFFFFFFFFFFFFFFFFFFFFFFFFFFFFFFFFFFFFFFFFFFFFFFFFFFFF:FFFFF  
@A00155:342:HHGFNDSXY:1:1674:4806:36683 2:N:0:GAACCTAG+TCCGCATA  
ACCCCTCCGGTCTTGTCCAACCTCTGTTTCGGCAGAGGATACCGTGCTCCACAGCTGTAAGGCTGTGG  
GCCCGAGAGAAGTCGCTCTCTCTCGCCCTCCACATCCCTCTCGGCATTGAGATGACCATAGGCCAGAG  
+  
FF:FFFFF:FFFF:FFFFFFFFFFFFFFFFFFFFFFFFFFFFFFFFFFFFFFFF:FFFFFFFFFFFFFFFFFFFFFFFF:FF  
F:FFFFFF:F:FF:FFFFFFF,FFFFFFFFFFFF:FFFFFFFFFFFF,FFFFFFFFFFFFFFFF,FFFFFFF  
@A00155:342:HHGFNDSXY:1:1675:28863:17942 2:N:0:GAACCTAG+TCCGCATA  
ACTTACACGGTAGGTCTGAACAAGCCCCGGAGTACATCTCCTTTGGAAGTAggagaccctccggTCT  
TGTCCAACCTCTGTTTCGGCAGAGGATACCGTGCTCCACAGCTGTAAGGCTGTGGGCCCGAGAGAAGT

FFFFFFFFFFFFFFFFFFFFFFFFFFFFFFFFFFFFFFFFFFFFFFFFFFFFFFFFFFF:FFFFFFFFFFFFFFFFFFFFFFFFFFFFFFFFFFFFFFFF  
FFFFFFFFFFFFFFFFFFFFFFFFFFFFFFFFFFFFFFFFFFFFFFFFFFFFFFFFFFFFFFFFFFFFFFFFFFFFFFFFFFFFFFFFFFFFFFFFFFFFFFFF  
@A00155:342:HHGFNDSXY:1:1675:12608:29716 2:N:0:GAACCTAG+TCCGCATA  
GTAGGTCGTGAACAAGCCCCGGAGTACATCTCCTTTGAACTAGGAGACCCTCCGGTCTTGTCACACC  
TCTGTTTTCGGCAGAGGATACCGTGCTCCACAGCTGTAAGGCTGTGGGCCCGAGAGAAGTCGCTCTCTC  
+  
FFFFFFFFFFFFFFFFFFFFFFFFFFFFFFFFFFFFFFFFFFFFFFFFFFFFFFFFFFF:FFFFFFFFFFFFFFFFFFFFFFFFFFFFFFFFFFFFFFFF  
FFFFFFFFFFFFFFFFFFFFFFFFFFFFFFFFFFFFFFFFFFFFFFFFFFFFFFFFFFFFFFFFFFFFFFFFFFFFFFFFFFFFFFFFFFFFFFFFFFFF,  
,FFFFFFFFFFFFFFFFFFFFFFFFFFFFFFFFFFFFFFFFFFFFFFFFFFFFFFFFFFFFFFFFFFFFFFFFFFFFFFFFFFFFFFFFFFFFFFFFFFFFFFFF  
@A00155:342:HHGFNDSXY:1:1675:3558:35274 2:N:0:GAACCTAG+TCCGCATA  
CTCTTCGAGTTGTGTAAGTTTCGTCCTAAAAAGGACTCGTCAGGTAGCCTACTAGACTACGACTTACA  
CGGTAGGTCGTGAACAAGCCCCGGAGTACATCTCCTTTGAACTAGGAGACCCTCCGGTCTTGTCACACC  
+  
FFFFFFFFFF:FFFFFFFFFFFFFFFFFFFFFFFFFFFFFFFFFFFFFFFFFFFFFFFFFFFFFFFFFFF:FFFFFFFFFFFFFFFFFFFFFFFFFFFFF  
FFFFFFFFFFFFFFFFFFFFFFFFFFFFFFFFFFFFFFFFFFFFFFFFFFFFFFFFFFFFFFFFFFFFFFFFFFFFFFFFFFFFFFFFFFFFFFFFFFFF:F:  
FFFFFFFFFFFFFFFFFFFFFFFFFFFFFFFFFFFFFFFFFFFFFFFFFFFFFFFFFFFFFFFFFFFFFFFFFFFFFFFFFFFFFFFFFFFFFFFFFFFF:F:  
@A00155:342:HHGFNDSXY:1:1675:8865:36605 2:N:0:GAACCTAG+TCCGCATA  
ACATCTCCTTTGAACTAGGAGACCCTCCGGTCTTGTCACACCCTCTGTTTCGGCAGAGGATACCGTG  
CTCCACAGCTGTAAGGCTGTGGGCCCGAGAGAAGTCGCTCTCTCTCGCCCTCCACATCCCTCTCGCA  
+  
FFFFFFFFFF:FFFF:FFFFFFFFFFFFFFFFFFFF:FFF,FFFFFFFFFFFFFFFFFFFFFFFFFFFFFFFFFF:FFFFFFFFFFFFF  
FFFFFFFFFFFF:FFFFF:FFFFFFFFFFFFFFFFFFFFF:F:FFFFFFFFFFFFFFFFFFFFFFFFFFFFFFFFFFFFFFFFFFFFFFFFFFFFF  
@A00155:342:HHGFNDSXY:1:1676:26549:6386 2:N:0:GAACCTAG+TCCGCATA  
ATCTCCTTTGGAACCAGGAGACCCTCCGGTCTTGTCACACCCTCTGTTTCGGCAGAGGATACCGTGCT  
CCACAGCTGTAAGGCTGTGGGCCCGAGAGAAGTCGCTCTCTCTCGCCCTCCACATCCCTCTCGCAT  
+  
FFFFFFFFFFFFFFFFFFFFFFFFFFFFFFFFFFFFFFFFFFFFFFFFFFFFFFFFFFF:FFFFFFFFFFFFFFFFFFFFFFFFFFFFF  
FFFFFFFFFFFFFFFFFFFFFFFFFFFFFFFFFFFFFFFFFFFFFFFFFFFFFFFFFFFFFFFFFFFFFFFFFFFFFFFFFFFFFFFFFFFFFFFFFFFF,:  
@A00155:342:HHGFNDSXY:1:1676:7075:23484 2:N:0:GAACCTAG+TCCGCATA  
AACTAGGAGACCCTCCGGTCTTGTCACACCCTCTGTTTCGGCAGAGGATACCGTGCTCCACAGCTGTA  
AGGCTGTGGGCCCGAGAGAAGTCGCTCTCTCTCGCCCTCCACATCCCTCTCGCAT

+  
FFFFFFFFFFFFFFFFFFFFFFFFFFFFFFFFFFFFFFFFFFFFFFFFFFFFFFFFFFF,FFFFFFFF  
FFFFFFFFFFFFFFFFFFFFFFFFFFFFFFFFFFFFFFFFFFFFFFFFFFFFFFFFFFFFFFFFFFFFFFFFFFFFFFFFFFFFFFFFFFFF,FFFF  
@A00155:342:HHGFNDSXY:1:1677:2781:4899 2:N:0:GAACCTAG+TCCGCATA  
CTACTAGACTACGACTTACACGGTAGGTCGTGAACAAGCCCCGGAGTACATCTCCTTTGAACTAGGAG  
ACCCTCCGGTCTTGTCACACCCTCTGTTTCGGCAGAGGATACCGTGCTCCACAGCTGTAAGGCTGTGG  
+  
:FFFFFFFF:FFFFFFFFFFFFF,:FFFFFFFFFFFFFFFF,FFF:FFFFFFFFFFFFFFFFFFFFF,FF:F:  
FFFFFFFFFFFFF:FFFFFFFFFFFF:FFFFFFFFFFFFFFFFF:FFFFFFFFFFFFF::F:F,FFFFFFFFFFFF  
@A00155:342:HHGFNDSXY:1:1677:16315:23422 2:N:0:GAACCTAG+TCCGCATA  
TTAGGACGAACTTACACAACCTCGAAGAGTAACGACGGTTTCGTCCTTGGAACGGACTCATCAGGGAG  
CTACTAGACTCCGACCGTCATGGGGGTTCAAACCCATGCCCGCCACACCGCCTTAGATCAGCTGTG  
+  
FFFFFFFFFFFFFFFFFFFFFFFFFFFFFFFFFFFFFFFFFFFFFFFFFFFFFFFFFFF:FFFFFFFFFFFFFFFFFFFFFFFFFFFFF:FFFFF:FFFF  
FFFFFFFFFFFFFFFFFFFFFFFFFFFFFFFFFFFFFFFFFFFFFFFFFFFFFFFFFFFFFFFFFFFFFFFFFFFFFFFFFFFFFFFFFFFFFFFFFFF  
@A00155:342:HHGFNDSXY:1:1678:16206:13088 2:N:0:GAACCTAG+TCCGCATA  
AAAAGGACTCGTCAGGTAGCCTACTAGACTACGACTTACACGGTAGGTCGTGAACAAGCCCCGGAGTAC  
ATCTCCTTTGGAACCAGGAGACCCTCCGGTCTTGTCACACCCTCTGTTTCGGCAGAGGATACCGTGCT  
+  
FFFFFFFFFFFFFFFFFFFFFFFFFFFFFFFFFFFFFFFFFFFFFFFFFFF,FFFFFFFFFFFFFFFFFFFFFFFFFFFFFFFFFF:FFFFF:FFFF  
FFFFFFFFFFFFFFFFFFFFFFFFFFFFFFFFFFFFFFFFFFFFFFFFFFFFFFFFFFFFFFFFFFFFFFFFFFFFFFFFFFFFFFFFFFFFFFFFFFF  
@A00155:342:HHGFNDSXY:1:1678:25464:14904 2:N:0:GAACCTAG+TCCGCATA  
AGCCCGGAGTACATCTCCTTTGAACTAGGAGACCCTCCGGTCTTGTCACACCCTCTGTTTCGGCAGAG  
GATACCGTGCTCCACAGCTGTAAGGCTGTGGGCCCGAGAGAAGTCGCTCTCTCTCGCCC

+

```
FFFFFFFFFFF:FFFFFFFFF:  
FFFFFFFFFFFFFFFFFFFFFFFFFFFFFFFFFFFFFFFFFFFFFFFFFFFFFFFFFFFFFFFF  
@A00155:342:HHGFNDSXY:1:1678:27281:24565 2:N:0:GAACCTAG+TCCGCATA  
TGGGTCGTGAACAAGCCC GGAGTACATCTCCTTTGGA ACTTAGGAGACCCTCCGGTCTTGCCAACCT  
CTGTTTCGGCAGAGGATAACCGTGCTCCACAGCTGTAAGGCTGTGGGCCCGAGAGAAGTCGCTCTCTCT  
+  
FFFF:FFFFFFFFFFFFFFFFFFFFFFFFFFFFFFFFFFFFFFFFFFFFFFFFFFFFFFFFFFFFFFFF, FFFFFFFFFF  
FFFFFFFFFFFFFFFFFFFFFFFFFFFFFFFFFFFFFFFFFFFFFFFFFFFFFFFFFFFFFFFFFFFFFFFF: FFFFFFFF  
@A00155:342:HHGFNDSXY:1:2101:28465:29152 2:N:0:GAACCTAG+TCCGCATA  
TAGGTCGTGAACAAGCCC GGAGTACATCTCCTTTGGA ACTTGGAGACCCTCCGGTCTTGCCAACCT  
CTGTTTCGGCAGAGGATAACCGTGCTCCACAGCTGTAAGGCTGTGGGCCCGAGAGAAGTCGCTCTCTCT  
+  
FFFF:FFFFFFFFFFFFFFFFFFFFFFFFFFFFFFFFFFFFFFFFFFFFFFFFFFFFFFFFFFFFFFFFFFFFFFFF  
FFFFFFFFFFFFFFFFFFFFFFFFFFFFFFFFFFFFFFFFFFFFFFFFFFFFFFFFFFFFFFFFFFFFFFFFFFFFFFFF  
@A00155:342:HHGFNDSXY:1:2101:7256:29684 2:N:0:GAACCTAG+TCCGCATA  
CGTTACTCTTCGAGTTGTGTAAGTTTCGTCCTAAA AAGGACTCGTCAGGTAGCCTACTAGACTACGAC  
TTACACGGTAGGTCGTGAACAAGCCC GGAGTACATCTCCTTTGGA ACTAGGAGACCCTCCGGTCTTG  
+  
FFFFFF:, FFFFFF, FF:, FF, FF:FFFF:FF, FFFFFFFFFF: FFFFFF, FF, F:F:, FFFFFFFFFF  
FFF, FFFFFFFFFFFFFFFFFFFFFFFFFFFFFFFFFFFFFF: FF, F::, FFFFFFFFFF: FFFFF: FFFFFFFF:  
@A00155:342:HHGFNDSXY:1:2101:32172:36448 2:N:0:GAACCTAG+TCCGCATA  
ATGCCGAGAGGGATGTAGAGGGCGAGAGAGAGCGACTTCTCTCGGGCCCCACAGCCTTACAGCTGTGGA  
GCACGGTATCCTCTGCC GAAACAGAGGTTGGACAAGACCGGAGGGGTCTCCTAGTTCAAAGGAGATG  
+  
FFFFFFFFFFFFFFFFFFFFFFFFFFFFFFFFFFFFFFFFFFFFFFFFFFFFFFFFFFFFFFFFFFFFFFFFFFFFF  
FFFFFFFFFFFFFFFFFFFFFFFFFFFFFFFFFFFFFFFFFFFFFFFFFFFFFFFFFFFFFFFFFFFFFFFF: FFFFFFFFFF  
@A00155:342:HHGFNDSXY:1:2102:29658:4789 2:N:0:GAACCTAG+TCCGCATA  
TAGGTCGTGAACAAGCCC GGAGTACATCTCCTTTGGA ACTTGGAGACCCTCCGGTCTTGCCAACCT  
CTGTTTCGGCAGAGGATAACCGTGCTCCACAGCTGTAAGGCTGTGGGCCCGAGAGAAGTCGCTCTCTCT  
+  
FFFFFFFFFFFFFFFFFFFFFFFFFFFFFFFFFFFFFFFFFFFFFFFFFFFFFFFFFFFFFFFFFFFFFFFFFFFFFFFF: FFFFFFFFFF  
FFFFFFFFFFFFFFFFFFFFFFFFFFFFFFFFFFFFFFFFFFFFFFFFFFFFFFFFFFFFFFFFFFFFFFFFFFFFFFFF  
@A00155:342:HHGFNDSXY:1:2102:4616:8609 2:N:0:GAACCTAG+TCCGCATA  
GGATACCGTGCTCCACAGCTGTAAGGCTGTGGGCCCGAGAGAAGTCGCTCTCTCTCGCCCTCCACATC  
CCTCTCGGCATTGAGATGACCATAGGCCAGAGGTGAGTCCTTAAGTGGACACAGCTGATCTAAGGCGG  
+  
FFFFFFFFFFFFFFFFFFFFFFFFFFFFFFFFFFFFFFFFFFFFFFFFFFFFFFFFFFFFFFFFFFFFFFFFFFFFFFFF  
FFFFFFFFFFFFFFFFFFFFFFFFFFFFFFFFFFFFFFFFFFFFFFFFFFFFFFFFFFFFFFFFFFFFFFFFFFFFFFFF  
@A00155:342:HHGFNDSXY:1:2102:4300:11005 2:N:0:GAACCTAG+TCCGCATA  
GGATACCGTGCTCCACAGCTGTAAGGCTGTGGGCCCGAGAGAAGTCGCTCTCTCTCGCCCTCCACATC  
CCTCTCGGCATTGAGATGACCATAGGCCAGAGGTGAGTCCTTAAGTGGACACAGCTGATCTAAGGCGG  
+  
FFFFFFFFFFFFFFFFFFFFFFFFFFFFFFFFFFFFFFFFFFFFFFFFFFFFFFFFFFFFFFFFFFFFFFFFFFFFFFFF  
FF: FFFFFFFF:: FF: FFFFFFFFFFFFFFFFFFFFFFFFFFFFFFFFFFFFFF, FFFFFFFFFFFFFFFFFF: FFFF  
@A00155:342:HHGFNDSXY:1:2102:11026:33708 2:N:0:GAACCTAG+TCCGCATA  
TTTCGTCCTAAAA AGGACTCGTCAGGTAGCCTACTAGACTACGACTTACACGGTAGGTCGTGAACAAG  
CCCGGAGTACATCTCCTTTGGA ACTAGGAGACCCTCCGGTCTTGCCAACCTCTGTTTCGGCAGAGG  
+  
FFFFFFFFFFFFFFFFFFFFFFFFFFFFFFFFFFFFFFFFFFFFFFFFFFFFFFFFFFFFFFFFFFFFFFFFFFFFFFFF  
FFFFFFFFFFFFFFFFFFFFFFFFFFFFFFFFFFFFFFFFFFFFFFFFFFFFFFFFFFFFFFFFFFFFFFFFFFFFFFFF  
@A00155:342:HHGFNDSXY:1:2103:9525:14606 2:N:0:GAACCTAG+TCCGCATA  
CTAAAA AGGACTCGTCAGGTAGCCTACTAGACTACGACTTACACGGTAGGTCGTGAACAAGCCC GGAG  
TACATCTCCTTTGGA ACTAGGAGACCCTCCGGTCTTGCCAACCTCTGTTTCGGCAGAGGATAACCGT
```

[illegible]

[illegible]

```

FFFFFFFFFFFFFFFFFFFFFFFFFFFFFFFFFFFFFFFFFFFFFFFFFFFFFFFFFFFFFFFFFFFFFFFFFFFFF:
FFFFFFFFFFFFFFFFFFFFFFFFFFFFFFFFFFFFFFFFFFFFFFFFFFFFFFFFFFFFFFFFFFFFFFFFFFFFFFF
@A00155:342:HHGFNDSXY:1:2109:18882:6699 2:N:0:GAACCTAG+TCCGCATA
GGGTTCAAACCCATGCCACCACACCGCCTTAGATCAGCTGTGTCCACTTAAGGACTCACCTCTGGC
CTATGGTCATCTCAATGCCGAGAGGGATGTGGAGGGCGAGAGAGAGCGACTTCTCTCGGGCCCACAGC
+
FFFFFFFFFFFFFF:FFFFFFFFFFFFFFFFFFFFFFFFFFFFFFFFFFFFFFFFFFFFFFFFFFFFFFFFFFFFFFF:FFFFFFFFFFFFFFFFFFF
FFF,FFFFFFFFFFFFFFFFFFFFFFFFFFFFFFFFFFFFFFFFFFFFFFFFFFFFFFFFFFFFFFFFFFFFFFFFF
@A00155:342:HHGFNDSXY:1:2109:15863:13463 2:N:0:GAACCTAG+TCCGCATA
CACGGTAGGTCGTGAACAAGCCCGGAGTACATCTCCTTTGGAAGTACAGAGACCCCTCCGGTCTTGTC
AACCTCTGTTTCGGCAGAGGATACCGTGCTCCACAGCTGTAAGGCTGTGGGCCCGAGAGAAGTCGCTC
+
FFFFFFFFFFFFFFFFFFFFFFFFFFFFFFFFFFFFFFFFFFFFFFFFFFFFFFFFFFFFFFFFFFFFFFFFF:FFFFFFFFFFFFFFFFFFFFFFFFF
FFFFFFFFFFFFFFFFFFFFFFFFFFFFFFFFFFFFFFFFFFFFFFFFFFFFFFFFFFFFFFFFFFFFFFFFFFFFFFF
@A00155:342:HHGFNDSXY:1:2109:8431:23171 2:N:0:GAACCTAG+TCCGCATA
GGACTCGTCAGGTAGCCTACTAGACTACGACTTACACGGTAGGTCGTGAACAAGCCCGGAGTACATCT
CCTTTGGAAGTACAGAGACCCCTCCGGTCTTGTC AACCTCTGTTTCGGCAGAGGATACCGTGCTCCAC
+
FFFFFFFFFFFFFFFFFFFFFFFFFFFFFFFFFFFFFFFFFFFFFFFFFFFFFFFFFFFFFFFFFFFFFFFFF:FFFFFFFFFFFFFFFFFFFFFFFFF
FFFFFFFFFFFFFFFFFFFFFFFFFFFFFFFFFFFFFFFFFFFFFFFFFFFFFFFFFFFFFFFFFFFFFFFFFFFFFFF:FFFFFFFFFFFFFFFFFFF
@A00155:342:HHGFNDSXY:1:2111:7907:13463 2:N:0:GAACCTAG+TCCGCATA
ACACCGCCTTAGATCAGCTGTGTCCACTTAAGGACTCACCTCTGGCCTATGGTCATCTCAATGCCGAG
AGGGATGTGAAGGGCGAGAGAGAGCGACTTCTCTCGGGCCCACAGCCTTACAGCTGTGGAGCACGGTA
+
FFFFFFFFFFFFFFFFFFFFFFFFFFFFFFFFFFFFFFFFFFFFFFFFFFFFFFFFFFFFFFFFFFFFFFFFF:FFFFFFFFFFFFFFFFFFFFFFFFF
FFFFFFFFFFFFFFFFFFFFFFFFFFFFFFFFFFFFFFFFFFFFFFFFFFFFFFFFFFFFFFFFFFFFFFFFFFFFFFF:FFFFFFFFFFFFFFFFFFF
@A00155:342:HHGFNDSXY:1:2111:27136:31140 2:N:0:GAACCTAG+TCCGCATA
ACTACGACTTACACGGTAGGTCGTGAACAAGCCCGGAGTACATCTCCTTTGGAAGTACAGAGACCCCTC
CGGTCTTGTC AACCTCTGTTTCGGCAGAGGATACCGTGCTCCACAGCTGTAAGGCTGTGGGCCCGAG
+
FFFFFFFFFFFFFFFFFFFFFFFFFFFFFFFFFFFFFFFFFFFFFFFFFFFFFFFFFFFFFFFFFFFFFFFFF:FFFFFFFFFFFFFFFFFFFFFFFFF
FFFFFFFFFFFFFFFFFFFFFFFFFFFFFFFFFFFFFFFFFFFFFFFFFFFFFFFFFFFFFFFFFFFFFFFFFFFFFFF:FFFFFFFFFFFFFFFFFFF
@A00155:342:HHGFNDSXY:1:2112:3188:26146 2:N:0:GAACCTAG+TCCGCATA
TGTGTAAGTTTTCGTCCTAAAAAGGACTCGTCAGGTAGCCTACTAGACTACGACTTACACGGTAGGTCG
TGAACAAGCCCGGAGTACATCTCCTTTGGAAGTACAGAGACCCCTCCGGTCTTGTC AACCTCTGTTTC
+
FFFFFFFFFFFFFFFFFFFFFFFFFFFFFFFFFFFFFFFFFFFFFFFFFFFFFFFFFFFFFFFFFFFFFFFFF,FFFFFFFFFFFFFFFFFF:FFFFF:FFFF:FF:FFF,FFFFFFFFFFFFFFFFF
FFFFFFFFF:FFFFFFFFFFFFFFFFFFFFFFFFFFFFFFFFFFFFFFFFFFFFFFFFFFFFFFFFFFFFFFFFFFFFFFF
@A00155:342:HHGFNDSXY:1:2112:3378:33144 2:N:0:GAACCTAG+TCCGCATA
CCTACTAGACTACGACTTACACGGTAGGTCGTGAACAAGCCCGGAGTACATCTCCTTTGGAACCAGGA
GACCCCTCCGGTCTTGTC AACCTCTGTTTCGGCAGAGGATACCGTGCTCCACAGCTGTAAGGCTGTG
+
FFFFFFFFFFFFFFFFFFFFFFFFFFFFFFFFFFFFFFFFFFFFFFFFFFFFFFFFFFFFFFFFFFFFFFFFF:FFFFFFFFFFFFFFFFFFFFFFFFF
FFFFFFFFFFFFFFFFFFFFFFFFFFFFFFFFFFFFFFFFFFFFFFFFFFFFFFFFFFFFFFFFFFFFFFFFFFFFFFF
@A00155:342:HHGFNDSXY:1:2112:10022:35603 2:N:0:GAACCTAG+TCCGCATA
AGTTTTCGTCCTAAAAAGGACTCGTCAGGTAGCCTACTAGACTACGACTTACACGGTAGGTCGTGAACA
AGCCCGGAGTACATCTCCTTTGGAAGTACAGAGACCCCTCCGGTCTTGTC AACCTCTGTTTCGGCAGA
+
FFFFFFFFFFFFFFFFFFFFFFFFFFFFFFFFFFFFFFFFFFFFFFFFFFFFFFFFFFFFFFFFFFFFFFFFF:FFFFF
FFFFFFFFFFFFFFFFFFFFFFFFFFFFFFFFFFFFFFFFFFFFFFFFFFFFFFFFFFFFFFFFFFFFFFFFFFFFFFF
@A00155:342:HHGFNDSXY:1:2113:29306:6277 2:N:0:GAACCTAG+TCCGCATA
CTACTAGACTACGACTTACACGGTAGGTCGTGAACAAGCCCGGAGTACATCTCCTTTGGAAGTACAGAG
ACCCCTCCGGTCTTGTC AACCTCTGTTTCGGCAGAGGATACCGTGCTCCACAGCTGTAAGGCTGTG
+

```

FFFFFFFFFFFFFFFFFFFFFFFFFFFFFFFFFFFFFFFFFFFFFFFFFFFFFFFFFFFFFFFFFFFFFFFF  
FFFFFFFFFFFFFF:FFFFFFFFFFFFFFFFFFFFFFFFFFFFFFFFFFFFFFFFFFFFFFFFFFFFFFFF:FFFFFFFF  
@A00155:342:HHGFNDSXY:1:2113:13223:7513 2:N:0:GAACCTAG+TCCGCATA  
CGTCTCTAAAAAGGACTCGTCAGGTAGCCTACTAGACTACGACTTACACGGTAGGTCGTGAACAAGCCC  
GGAGTACATCTCCTTTGGAAGTACGAGACCCCTCCGGTCTTGTCCAACCTCTGTTTCGGCAGAGGATA  
+  
FFFFFFFFFFFFFFFFFFFFFFFFFFFFFFFFFFFFFFFFFFFFFFFFFFFFFFFFFFFFFFFFFFFFFFFF  
FFFFFFFFFFFFFF:FFFFFFFFFFFFFFFFFFFFFFFFFFFFFFFFFFFFFFFFFFFFFFFFFFFFFFFF  
@A00155:342:HHGFNDSXY:1:2113:23574:13479 2:N:0:GAACCTAG+TCCGCATA  
CTCTTTGAGTTGTGTAAGTTTCGTCTCTAAAAAGGACTCGTCAGGTAGCCTACTAGACTACGACTTACA  
CGGTAGGTCGTGAACAAGCCCGGAGTACATCTCCTTTGGAAGTACGAGACCCCTCCGGTCTTGTCCA  
+  
FFF:FFFFFFFFFFFFFFFFFFFFFFFFFFFFFFFFFFFFFFFFFFFFFFFFFFFFFFFFFFFFFFFF  
FFFFFFFFFFFFFF:FFFFFFF,FFFFFFFFFFFFFFFFFFFFFFFFFFFFFFFFFFFFFFFFFFFFFFFF  
@A00155:342:HHGFNDSXY:1:2113:30834:16376 2:N:0:GAACCTAG+TCCGCATA  
GGAAGTACGAGACCCCTCCGGTCTTGTCCAACCTCTGTTTCGGCAGAGGATACCGTGCTCCACAGCTG  
TAAGGCTGTGGGCCCGAGAGAAGTCGCTCTCTCTCGCCCTCCACATCCCTCTCGGCAGTGAGATGACC  
+  
FFFFFFFFFFFFFFFFFFFFFFFFFFFFFFFFFFFFFFFFFFFFFFFFFFFFFFFFFFFFFFFFFFFFFFFF  
FF:FFFFFFFFFFFFFFFFFFFFFFFFFFFFFFFFFFFFFFFFFFFFFFFFFFFFFFFFFFFFFFFF,FFFFFFFF  
@A00155:342:HHGFNDSXY:1:2113:20844:23062 2:N:0:GAACCTAG+TCCGCATA  
AGTACATCTCCTTTGGAAGTACGAGACCCCTCCGGTCTTGTCCAACCTCTGTTTCGGCAGAGGATACC  
GTGCACCACAGCTGTAAGGCTGTGGGCCCGAGAGAAGTCGCTCTCTCTCGCCCTCCACATCCCTCTCG  
+  
FFFFFFFFFFFFFFFFFFFFFFFFFFFFFFFFFFFFFFFFFFFFFFFFFFFFFFFFFFFFFFFFFFFFFFFF  
FFFFFFFFFFFFFF:FFFFFFFFFFFFFFFFFFFFFFFFFFFFFFFFFFFFFFFFFFFFFFFFFFFFFFFF  
@A00155:342:HHGFNDSXY:1:2113:16731:27367 2:N:0:GAACCTAG+TCCGCATA  
CTTCTCTCGGGCCACAGCCTTACAGCTGTGGAGCACGGTATCCTCTGCCGAAACAGAGGTTGGACAA  
GACCGGAGGGGTCTCCTGGTTCCAAAGGAGATGTACTCCGGGCTTGTTCACGACCTACCGTGTAAGTC  
+  
FFFFFFFFFFFFFFFFFFFFFFFFFFFFFFFFFFFFFFFFFFFFFFFFFFFFFFFFFFFFFFFFFFFFFFFF  
FFFFFFFFFFFFFF:FFFFFFFFFFFFFFFFFFFFFFFFFFFFFFFFFFFFFFFFFFFFFFFFFFFFFFFF  
@A00155:342:HHGFNDSXY:1:2113:26901:32831 2:N:0:GAACCTAG+TCCGCATA  
GGAGTACATCTCCTTTGGAAGTACGAGACCCCTCCGGTCTTGTCCAACCTCTGTTTCGGCAGAGGATA  
CCGTGCTCCACAGCTGTAAGGCTGTGGGCCCGAGAGAAGTCGCTCTCTCTCGCCCTCTACATCCCTCT  
+  
FFFFFFFFFFFFFFFFFFFFFFFFFFFFFFFFFFFFFFFFFFFFFFFFFFFFFFFFFFFFFFFFFFFFFFFF  
FFFFFFFFFFFFFF:FFFFFFFFFFFFFFFFFFFFFFFFFFFFFFFFFFFFFFFFFFFFFFFFFFFFFFFF  
@A00155:342:HHGFNDSXY:1:2113:27724:35822 2:N:0:GAACCTAG+TCCGCATA  
TCCAAGGACGAAACCGTCGTTACTCTTCGAGTTGTGTAAGTTTCGTCTCTAAAAAGGACTCGTCAGGTA  
GCCTACTAGACTACGACTTACACGGTAGGTCGTGAACAAGCCCGGAGTACATCTCCTTTGGAAGTACG  
+  
FFFFFFFFFFFFFFFFFFFF,FFFFFFFF, :FFFFFFFFFFFFFFFF: :FFFFFFFFFFFFFF:FFFFFFFFFFFF  
FFFFFFFF, F:FFFFF, FFFFFFFFFFFFFFFFFFFFFFFFFFFFFFFFFFFFFFFFFFFFFFFFF: FFF: FFFFFF, F: F  
@A00155:342:HHGFNDSXY:1:2114:26341:8061 2:N:0:GAACCTAG+TCCGCATA  
AAGCCCGGAGTACATCTCCTTTGGAAGTACGAGACCCCTCCGGTCTTGTCCAACCTCTGTTTCGGCAG  
AGGATACCGTGCTCCACAGCTGTAAGGCTGTGGGCCCGAGAGAAGTCGCTCTCTCTCGCC  
+  
FFFFFFFFFFFFFFFFFFFFFFFFFFFFFFFF: F:FFFFFFFFFFFFFFFFFFFFFFFFFFFFFFFF: FFFFFFFFFFFFFFFFFF  
FFFF, F: FFFFFFFFF: FFFFFFFFF, FFF: FFFFFFFFFFFFFFFFFFFFFFFFFFFFFFFFFF  
@A00155:342:HHGFNDSXY:1:2114:2284:20447 2:N:0:GAACCTAG+TCCGCATA  
AAACCGTCGTTACTCTTCGAGTTGTGTAAGTTTCGTCTCTAAAAAGGACTCGTCAGGTAGCCTACTAGA  
ATACGACTTACACGGTAGGTCGTGAACAAGCCCGGAGTACATCTCCTTTGGAAGTACGAGACCCCTC  
+

:FF:FFFFFFFFFFFF:F:F:FFFFFFFFFFFF,F,F:FFFF,:F:,FFFFFFFFFFFFFFFF,FF,F  
,FFF::FFFF:F,F:FFFF:F,F:F,FFF:,FFFFFFFF:FF:F:,F:FFFFFF:FFFFFFFF  
@A00155:342:HHGFNDSXY:1:2114:9372:31845 2:N:0:GAACCTAG+TCCGCATA  
GGCCTATGGTCATCTCAATGCCGAGAGGGATGTGAAGGGCGAGAGAGAGCGACTTCTCTCGGGCCCCAC  
AGCCTTACAGCTGTGGAGCACGGTATCCTCTGCCGAAACAGAGGTTGGACAAGACCGGAG  
+  
FFFF:FFFFFFFFFFFFFFFFFFFFFFFFFFFFFFFFFFFFFFFFFFFFFFFFFFFFFFFFFFFFFFFF  
FFFFFFFFFFFFFFFFFFFFFFFFFFFFFFFFFFFFFFFFFFFFFFFFFFFFFFFFFFFFFFFFFFFF,FFFF:FFFFFFFF:FFFF  
@A00155:342:HHGFNDSXY:1:2114:21441:32017 2:N:0:GAACCTAG+TCCGCATA  
AGACCCCTCCGGTCTTGTCCAACCTCTGTTTCGGCAGAGGATACCGTGCTCCACAGCTGTAAGGCTGT  
GGGCCCAGAGAGAAGTCGCTCTCTCTCGCCCTCCACATCCCTCTCGGCATTGAGATGACCATAGGCCAG  
+  
FFFFFFFFFFFFFFFFFFFFFFFFFFFFFFFFFFFFFFFFFFFFFFFFFFFFFFFFFFFFFFFFFFFF:FFFFFFFF  
FFFFFFFFFFFFFFFFFFFFFFFFFFFFFFFFFFFFFFFFFFFFFFFFFFFFFFFFFFFFFFFFFFFF:FFFFFFFFFFFFFFFF  
@A00155:342:HHGFNDSXY:1:2115:5258:35744 2:N:0:GAACCTAG+TCCGCATA  
GGACTCGTCAGGTAGCCTACTAGACTACGACTTACACGGTAGGTCGTGAACAAGCCCGGAGTACATCT  
CCTTTGGAACCAGGAGACCCCTCCGGTCTTGTCCAACCTCTGTTTCGGCAGAGGATACCGTGCTCCAC  
+  
FFFFFFFFFFFFFFFFFFFFFFFFFFFFFFFFFFFFFFFFFFFFFFFFFFFFFFFFFFFFFFFFFFFF  
FFFFFFFF,FFFFFFFFFFFFFFFFFFFFFFFFFFFFFFFFFFFFFFFFFFFFFFFFFFFFFFFFFFFFF:FFFFFFFFFFFFFFFF  
@A00155:342:HHGFNDSXY:1:2116:15094:19930 2:N:0:GAACCTAG+TCCGCATA  
CTAGGAGACCCCTCCGGTCTTGTCCAACCTCTGTTTCGGCAGAGGATACCGTGCTCCACAGCTGTAAG  
GCTGTGGGCCCGAGAGAAGTCGCTCTCTCTCGCCCTCTACATCCCTCTCGGCATTGAGATGACCATAG  
+  
FFFFFFFFFFFFFFFFFFFFFFFFFFFFFFFFFFFFFFFFFFFFFFFFFFFFFFFFFFFFFFFFFFFF  
FFFFFFFFFFFFFFFFFFFFFFFFFFFFFFFFFFFFFFFFFFFFFFFFFFFFFFFFFFFFFFFFFFFF,FFFFFFFFFFFF  
@A00155:342:HHGFNDSXY:1:2116:15383:22247 2:N:0:GAACCTAG+TCCGCATA  
CCCCTCCGGTCTTGTCCAACCTCTGTTTCGGCAGAGGATACCGTGCTCCACAGCTGTAAGGCTGTGGG  
CCCAGAGAGAAGTCGCTCTCTCTCGCCCTTACATCCCTCTCGGCATTGAGATGACCATAGGCCAGAGG  
+  
FFFFFFFFFFFFFFFFFFFFFFFFFFFFFFFFFFFFFFFFFFFFFFFFFFFFFFFFFFFFFFFFFFFF,FFFFFFFF  
FFFF,FFFFFFFFFFFFFFFFFFFFF:FFFFFFFFFFFFFFFFFFFFFFFFFFFFFFFF,FF:FFFFFFFFFFFFFFFF  
@A00155:342:HHGFNDSXY:1:2116:18150:33019 2:N:0:GAACCTAG+TCCGCATA  
AGCCCGGAGTACATCTCCTTTGGAAGTACGAGACCCCTCCGGTCTTGTCCAACCTCTGTTTCGGCAGA  
GGATACCGTGCTCCACAGCTGTAAGGCTGTGGGCCCGAGAGAAGTCGCTCTCTCTCGCC  
+  
FFFFFFFFFFFFFFFFFFFFFFFFFFFF:F:FFFFFFFFFFFFFFFFFFFFFFFFFFFFFFFFFFFFFFFF  
FFFFFFFFFFFFFFFFFFFFFFFFFFFFFFFF,FFFFFFFFFFFFFFFFFFFFFFFFFFFFFFFFFFFFF  
@A00155:342:HHGFNDSXY:1:2117:9444:8484 2:N:0:GAACCTAG+TCCGCATA  
GGACGAACTTACACAACCTCGAAGAGTAACGACGTTTCGTCTTGAACGGACTCATCAGGAAGCCT  
ACTAGACTCCGACCGTCATGGGGTTCAAACCCATGCCCCGCCACACCGCCTTAGATCAGCTGTGTCC  
+  
FFFFFFFFFFFFFFFFFFFFFFFFFFFFFFFFFFFFFFFFFFFFFFFFFFFFFFFFFFFFFFFFFFFF  
FFFFFFFFFFFFFFFFFFFFFFFFFFFFFFFFFFFFFFFFFFFFFFFFFFFFFFFFFFFFFFFFFFFF  
@A00155:342:HHGFNDSXY:1:2118:27778:6104 2:N:0:GAACCTAG+TCCGCATA  
GGACTCGTCAGGTAGCCTACTAGACTACGACTTACACGGTAGGTCGTGAACAAGCCCGGAGTACATCT  
CCTTTGGAAGTACGAGACCCCTCCGGTCTTGTCCAACCTCTGTTTCGGCAGAGGATACCGTGCTCCAC  
+  
FFFFFFFFFFFFFFFFFFFFFFFFFFFFFFFFFFFFFFFFFFFFFFFFFFFFFFFFFFFFFFFFFFFF  
FFFFFFFFF:FFFFFFFFF::FFFFFFFFFFFFF:FFFFFFFFFFFFFFFFFFFFFFFFFFFF:FFFFFFF  
@A00155:342:HHGFNDSXY:1:2118:1533:6558 2:N:0:GAACCTAG+TCCGCATA  
TCCACTTAAGGACTCACCTCTGGCCTATGGTCATCTCAATGCCGAGAGGGATGTAGAGGGCGAGAGAG  
AGCGACTTCTCTCGGGCCCACAGCCTTACAGCTGTGGAGCACGGTATCCTCTGCCGAAACAGAGGTTG  
+



FFFF:F:FFFFFFFFFFFFFFFFFFFFFFFFFFFFFFFFFFFFFFFFFFFFFFFFFFFFFFFFFFFFFFFFFFFFFFFFFFFFFFFFFFFFFFFFFFFFFFFFFFFFFFF:FFFFFFFF  
FFFFFFFFFFFFFFFFFFFFFFFFFFFFFFFFFFFFFFFFFFFFFFFFFFFFFFFFFFFFFFFFFFFFFFFFFFFFFFFFFFFFFFFFFFFFFFFFFFFFFFFFF:  
@A00155:342:HHGFNDSXY:1:2118:16929:7733 2:N:0:GAACCTAG+TCCGCATA  
AAAAGGACTCGTCAGGTAGCCTACTAGACTACGACTTACACGGTAGGTCGTGAACAAGCCCCGGAGTAC  
ATCTCCTTTGGAACCAGGAGACCCCTCCGGTCTTGTC AACCTCTGTTTTCGGCAGAGGATACCGTGCT  
+  
FFFFFFFFFFFFFFFFFFFFFFFFFFFFFFFFFFFFFFFFFFFFFFFFFFFFFFFFFFFFFFFFFFFFFFFFFFFFFFFFFFFFFFFFFFFFFFFFFFFFFFF  
FFFFFFFFFFFFFFFF, FFFFFFFF:FFFFFFFFFFFFFFFFFFFFFFFFFFFFFFFFFFFFFFFFFFFFFFFFFFFFFFFFFFFFFFFFFFFFFFFFF:F:FFFFFFF  
@A00155:342:HHGFNDSXY:1:2119:2130:5337 2:N:0:GAACCTAG+TCCGCATA  
AGCCCGGAGTACATCTCCTTTGGAAGT TAGGAGACCCCTCCGGTCTTGTC AACCTCTGTTTCGGCAGA  
GGATACCGTGCTCCACAGCTGTAAGGCTGTGGGCCCGAGAGAAGTCGCTCTCTCTCGCC  
+  
FFFFFFFFFFFFFFFFFFFFFFFFFFFFFFFFFFFFFFFFFFFFFFFFFFFFFFFFFFFFFFFFFFFFFFFFFFFFFFFFFFFFFFFFFFFFFFFFFFFFFFF,  
FFFFFFFFFFFF:FF:FF:FFFFFFFFFFFFFFFFFFFFFFFFFFFFFFFFFFFFFFFFFFFFFFFFFFFFFFFFFFFFFFFFFFFFFFFFF, FF  
@A00155:342:HHGFNDSXY:1:2119:23918:12571 2:N:0:GAACCTAG+TCCGCATA  
GCTGTGTCCA CTTAAAGGACTCACCTCTGGCCTATGGTCATCTCAATGCCGAGAGGGATGTGGAGGGCG  
AGAGAGAGCGACTTCTCTCGGGCCCACAGCCTTACAGCTGTGGAGCACGGTATCCTCTGCCGAAACAG  
+  
FFFFFFFFFFF:FFFFFFFFFFFFFFFFFFFFFFFFFFFFFFFFFFFFFFFFFFFFFFFFFFFFFFFFFFFFFFFFFFFFFFFFFFFFFFFFFFFFFFFFF  
FFFFFFFFFFFFFFFFFFFFFFFFFFFFFFFFFFFFFFFFFFFFFFFFFFFFFFFFFFFFFFFFFFFFFFFFFFFFFFFFFFFFFFFFFFFFFFFFFFFFFFF  
@A00155:342:HHGFNDSXY:1:2120:27787:9596 2:N:0:GAACCTAG+TCCGCATA  
AAAAGGACTCGTCAGGTAGCCTACTAGACTACGACTTACACGGTAGGTCGTGAACAAGCCCCGGAGTAC  
ATCTCCTTTGGAAGT TAGGAGACCCCTCCGGTCTTGTC AACCTCTGTTTTCGGCAGAGGATACCGTGCT  
+  
FFFFFFFFFFFFFFFFFFFFFFFFFFFFFFFFFFFFFFFFFFFFFFFFFFFFFFFFFFFFFFFFFFFFFFFFFFFFFFFFFFFFFFFFFFFFFFFFFFFFFFF  
FFFFFFFFFFFFFFFFFFFFFFFFFFFFFFFFFFFFFFFFFFFFFFFFFFFFFFFFFFFFFFFFFFFFFFFFFFFFFFFFFFFFFFFFFFFFFFFFFFFFFFF  
@A00155:342:HHGFNDSXY:1:2120:29279:12680 2:N:0:GAACCTAG+TCCGCATA  
GGTAGGTCGTGAACAAGCCCCGGAGTACATCTCCTTTGGAAGT TAGGAGACCCCTCCGGTCTTGTC AAC  
CTCTGTTTCGGCAGAGGATACCGTGCTCCACAGCTGTAAGGCTGTGGGCCCGAGAGAAGTCGCTCTCT  
+  
FFFFFFFFFFFFFFFFFFFFFFFFFFFFFFFFFFFFFFFFFFFFFFFFFFFFFFFFFFFFFFFFFFFFFFFFFFFFFFFFFFFFFFFFFFFFFFFFFFFFFFF,  
FFFFFFFFFFFFFFFFFFFFFFFFFFFFFFFFFFFFFFFFFFFFFFFFFFFFFFFFFFFFFFFFFFFFFFFFFFFFFFFFFFFFFFFFFFFFFFFFFFFFFFF  
FFFFFFFFFFFFFFFFFFFFFFFFFFFFFFFFFFFFFFFFFFFFFFFFFFFFFFFFFFFFFFFFFFFFFFFFFFFFFFFFFFFFFFFFFFFFFFFFFFFFFFF:  
@A00155:342:HHGFNDSXY:1:2120:6958:20306 2:N:0:GAACCTAG+TCCGCATA  
TTTCGTCCTAAAAAGGACTCGTCAGGTAGCCTACTAGACTACGACTTACACGGTAGGTCGTGAACAAG  
CCCCGGAGTACATCTCCTTTGGAACCAGGAGACCCCTCCGGTCTTGTC AACCTCTGTTTCGGCAGAGG  
+  
FFFFFFFFFFFFFFFFFFFFFFFFFFFFFFFFFFFFFFFFFFFFFFFFFFFFFFFFFFFFFFFFFFFFFFFFFFFFFFFFFFFFFFFFFFFFFFFFFFFFFFF  
FFFFFFFFFFFFFFFFFFFFFFFFFFFFFFFFFFFFFFFFFFFFFFFFFFFFFFFFFFFFFFFFFFFFFFFFFFFFFFFFFFFFFFFFFFFFFFFFFFFFFFF:  
FFFFFFFFFFFFFFFFFFFFFFFFFFFFFFFFFFFFFFFFFFFFFFFFFFFFFFFFFFFFFFFFFFFFFFFFFFFFFFFFFFFFFFFFFFFFFFFFFFFFFFF,  
@A00155:342:HHGFNDSXY:1:2120:25446:21324 2:N:0:GAACCTAG+TCCGCATA  
TCGTGAACAAGCCCCGGAGTACATCTCCTTTGGAAGT TAGGAGACCCCTCCCGTCTTGTC AACCTCTGT  
TTCGGCAGAGGATACCGTGCTCCACAGCTGTAAGGCTGTGGGCCCGAGAGAAGTCGCTCTCTCTCGCC  
+  
FFFFFFFFFFFFFFFFFFFFFFFFFFFFFFFFFFFFFFFFFFFFFFFFFFFFFFFFFFFFFFFFFFFFFFFFFFFFFFFFFFFFFFFFFFFFFFFFFFFFFFF:  
FFFFFFFFFFFFFFFFFFFFFFFFFFFFFFFFFFFFFFFFFFFFFFFFFFFFFFFFFFFFFFFFFFFFFFFFFFFFFFFFFFFFFFFFFFFFFFFFFFFFFFF  
@A00155:342:HHGFNDSXY:1:2120:28212:23422 2:N:0:GAACCTAG+TCCGCATA  
AAAAGGACTCGTCAGGTAGCCTACTAGACTACGACTTACACGGTAGGTCGTGAACAAGCCCCGGAGTAC  
ATCTCCTTTGGAAGT TAGGAGACCCCTCCGGTCTTGTC AACCTCTGTTTCGGCAGAGGATACCGTGCT  
+  
FFFFFFFFFFFFFFFFFFFFFFFFFFFFFFFFFFFFFFFFFFFFFFFFFFFFFFFFFFFFFFFFFFFFFFFFFFFFFFFFFFFFFFFFFFFFFFFFFFFFFFF:  
FFFFFFF:FFFFFFFFFFFFFFFFFFFFFFFFFFFFFFFFFFFFFFFFFFFFFFFFFFFFFFFFFFFFFFFFFFFFFFFFFFFFFFFFFFFFFFFFFFFFFFF  
@A00155:342:HHGFNDSXY:1:2120:31910:34522 2:N:0:GAACCTAG+TCCGCATA  
AAAAGGACTCGTCAGGTAGCCTACTAGACTACGACTTACACGGTAGGTCGTGAACAAGCCCCGGAGTAC  
ATCTCCTTTGGAAGT TAGGAGACCCCTCCGGTCTTGTC AACCTCTGTTTCGGCAGAGGATACCGTGCT

FFFFFFFFFFFFFFFFFFFFFFFFFFFFFFFF:F:FFFFFF:,FFFFFFFF:FFFFFFFF  
FFFFFF:FFFF,FFFF:FFFFFFFF:FFF,FFFFFFFFFFFFFFFF,FFFFFFFFFFFFFFFF,:FF  
@A00155:342:HHGFNDSXY:1:2121:3522:34021 2:N:0:GAACCTAG+TCCGCATA  
AACTAGGAGACCCCTCCGGTCTTGTCCAACCTCTGTTTCGGCAGAGGATACCGTGCTCCACAGCTGTA  
AGGCTGTGGGCCCGAGAGAAGTCGCTCTCTCGCCCTCCACATCCCTCTCGGCATTGAGATGACCAT  
+  
FFFFFFFFFFFFFFFFFFFFFFFFFFFFFFFFFFFFFFFFFFFFFFFFFFFFFFFFFFFFFFFF  
FFFFFFFFFFFFFFFFFFFFFFFFFFFFFFFFFFFFFFFFFFFFFFFFFFFFFFFFFFFFFFFF  
@A00155:342:HHGFNDSXY:1:2122:18069:15562 2:N:0:GAACCTAG+TCCGCATA  
AAGGACGAAACCGTCGTTACTCTTCGAGTTGTGTAAGTTTCGTCCTAAAAAGGACTCGTCAGGTAGCC  
TACTAGACTACGACTTACACGGTAGGTCGTGAACAAGCCCGAGTACATCTCCTTTGGAAGTAGGAGA  
+  
FFFFFFFFFFFFFFFFFFFFFFFFFFFFFFFFFFFFFFFFFFFFFFFFFFFFFFFFFFFFFFFF  
FFFFFFFFFFFFFFFFFFFFFFFFFFFFFFFFFFFFFFFFFFFFFFFFFFFFFFFFFFFFFFFF  
@A00155:342:HHGFNDSXY:1:2122:29342:23782 2:N:0:GAACCTAG+TCCGCATA  
TTACACGGTAGGTCGTGAACAAGCCCGGAGTACATCTCCTTTGGAACCAGGAGACCCCTCCGGTCTTG  
TCCAACCTCTGTTTCGGCAGAGGATACCGTGCTCCACAGCTGTAAGGCTGTGGGCCCGAGAGAAGTCG  
+  
FFFFFFFFFFFFFFFFFFFFFFFFFFFFFFFFFFFFFFFFFFFFFFFFFFFFFFFFFFFFFFFF  
FFFFFFFFFFFFFFFFFFFFFFFFFFFFFFFFFFFFFFFFFFFFFFFFFFFFFFFFFFFFFFFF  
@A00155:342:HHGFNDSXY:1:2122:19199:33238 2:N:0:GAACCTAG+TCCGCATA  
AGTTTCGTCCTAAAAAGAACTCGTCAGGTAGCCTACTAGACTACGACTTACACGGTAGGTCGTGAACA  
AGCCCGGAGTACATCTCCTTTGGAAGTAGGAGACCCCTCCGGTCTTGTCCAACCTCTGTTTCGGCAGA  
+  
FFFFFFFFFFFFFFFFFFFFFFFFFFFFFFFFFFFFFFFFFFFFFFFFFFFFFFFFFFFFFFFF  
FFFFFFFFFFFFFFFFFFFFFFFFFFFFFFFFFFFFFFFFFFFFFFFFFFFFFFFFFFFFFFFF  
@A00155:342:HHGFNDSXY:1:2122:11957:35540 2:N:0:GAACCTAG+TCCGCATA  
ACTCGTCAGGTAGCCTACTAGACTACGACTTACACGGTAGGTCGTGAACAAGCCCGGAGTACATCTCC  
TTTGAACCAGGAGACCCCTCCGGTCTTGTCCAACCTCTGTTTCGGCAGAGGATACCGTGCTCCACAG  
+  
FFFFFFFFFFFFFFFFFFFFFFFFFFFFFFFFFFFFFFFFFFFFFFFFFFFFFFFFFFFFFFFF  
FFFFFFFFFFFFFFFFFFFFFFFFFFFFFFFFFFFFFFFFFFFFFFFF:F:FFFFFF:F:FFFFFF  
@A00155:342:HHGFNDSXY:1:2122:1362:36511 2:N:0:GAACCTAG+TCCGCATA  
GTTTCGTCCTAAAAAGGACTCGTCAGGTAGCCTACTAGACTACGACTTACACGGTAGGTCGTGAACAA  
GCCCGGAGTACATCTCCTTTGGAAGTAGGAGACCCCTCCGGTCTTGTCCAACCTCTGTTTCGGCAGAG  
+  
FFFFFFFFFFFFFFFF:F:FFFFFF:FFFFF,:FFFFFFFF,FFFF:FFFFFFFFFFFFFFFF  
FFFFFFFFFFFFFFFFFFFFFFFFFFFFFFFFFFFFFFFFFFFFFFFF:FFFFFFFFFFFFFFFF:FFFFFFFFFF,F  
@A00155:342:HHGFNDSXY:1:2123:12210:6574 2:N:0:GAACCTAG+TCCGCATA  
TACGACTTACACGGTAGGTCGTGAACAAGCCCGGAGTACATCTCCTTTGGAAGTAGGAGACCCCTCCG  
GTCTTGTCCAACCTCTGTTTCGGCAGAGGATACCGTGCTCCACAGCTGTAAGGCTGTGGGCCCG  
+  
FFFFFFFFFFFFFFFFFFFFFFFFFFFFFFFFFFFFFFFFFFFFFFFFFFFFFFFFFFFFFFFF  
FFFFFFFFFFFFFFFFFFFFFFFFFFFFFFFFFFFFFFFFFFFFFFFFFFFFFFFF:FFFFFFFFFFFFFFFF  
@A00155:342:HHGFNDSXY:1:2123:18954:9111 2:N:0:GAACCTAG+TCCGCATA  
GGTAGCTTACTAGACTACGACTTACACGGTAGGTCGTGAACAAGCCCGGAGTACATCTCCTTTGGAAC  
TAGGAGACCCCTCCGGTCTTGTCCAACCTCTGTTTCGGCAGAGGATACCGTGCTCCACAGCTGTAAGG  
+  
FFF:FFFFFFFFFFFFFFFFFFFFFFFFFFFFFFFFFFFFFFFFFFFFFFFFFFFFFFFF:F:FFFFFF:F  
FFFFFFFFFFFFFFFFFFFFFFFFFFFFFFFFFFFFFFFFFFFFFFFFFFFFFFFFFFFFFFFF:FFFFFFFFFFFFFFFF  
@A00155:342:HHGFNDSXY:1:2123:4544:20415 2:N:0:GAACCTAG+TCCGCATA  
AGCCCGGAGTACATCTCCTTTGGAAGTAGGAGACCCCTCCGGTCTTGTCCAACCTCTGTTTCGGCAGA  
GGATACCGTGCTCCACAGCTGTAAGGCTGTGGGCCCGAGAGAAGTCGCTCTCTCTCGCCC  
+

FFFFFFFFFFFFFFFFFFFFFFFFFFFFFFFFFFFFFFFFFFFFFFFFFFFFFFFFFFFFFFFFFFFFFFFF  
FFFFFFFFFFFFFFFFFFFFFFFFFFFFFFFFFFFFFFFFFFFFFFFFFFFFFFFFFFFFFFFFFFFFFFFF  
@A00155:342:HHGFNDSXY:1:2124:3450:28667 2:N:0:GAACCTAG+TCCGCATA  
CAAGGACGAAACCGTCGTTACTCTTTGAGTTGTGTAAGTTTCGTCCTAAAAAGGACTCGTCAGGTAGC  
CTACTAGACTACGACTTACACGGTAGGTCGTGAACAAGCCCGAGTACATCTCCTTTGGAAGTAGGAG  
+  
FFFFFFFFFFFFFF:FFFFFFFFFFFFFF:F:FFFFFFFFFFFFFFFFFFFF,F:F,FFFFFFFF:FF:FFFF  
FFF,:FFFFFFF,:FFFFFFFFFFFFFFF:,FFF,FFFFFFFFFFFFFFFFFFFFFFF,FFFFF:FFFFFFF,FF  
@A00155:342:HHGFNDSXY:1:2124:28908:28917 2:N:0:GAACCTAG+TCCGCATA  
GAGACCCCTCCGGTCTTGTCCAACCTCTGTTTCGGCAGAGGATACCGTGCTCCACAGCTGTAAGGCTG  
TGGGCCCCGAGAGAAGTCGCTCTCTCTCGCCCTCCACATCCCTCTCGGCATTGAGATGACCATAGGCC  
+  
FFFFFFFFFFFFFFFFFFFFFFFFFFFFFFFFFFFFFFFFFFFFFFFFFFFFFFFFFFFFFFFFFFFFFFFF:FFFFFFFF  
FFFFFFF,FFFFFFF:F:FFFFFFFFFFFF,FFFFF,FFFFF:FFFFFFFFFFFF:FFFFFFFFFFFFFFFFFFFF  
@A00155:342:HHGFNDSXY:1:2124:31882:31156 2:N:0:GAACCTAG+TCCGCATA  
TACGACTTACACGGTGGGTCGTGAACAAGCCCGAGTACATCTCCTTTGGAAGTAGGAGACCCCTCCG  
GTCTTGTCCAACCTCTGTTTCGGCAGAGGATACCGTGCTCCACAGCTGTAAGGCTGTGGGCCCG  
+  
FFFFFFF:FFFFFFF,FFFFFFFFFFFFFFFFFFFFFFFFFFFF,:FFFFFFFFFFFFFFFFFFFFFFFFFFFF:FFFF  
FFF,:FFFF:FFFFFFFFFFFF:F:FF,FFFFF:,FFFFFFFFF:FFFFFFF,FFFFFFFFFFFFFFFFFFFF  
@A00155:342:HHGFNDSXY:1:2125:23231:10755 2:N:0:GAACCTAG+TCCGCATA  
GGACTCGTCAGGTAGCCTACTAGACTACGACTTACACGGTAGGTCGTGAACAAGCCCGAGTACATCT  
CCTTTGGAAGTAGGAGACCCCTCCGGTCTTGTCCAACCTCTGTTTCGGCAGAGGATACCGTGCTCCAC  
+  
FFFFFFFFFFFFFFFFFFFFFFFFFFFFFFFFFFFFFFFFFFFFFFFFFFFFFFFFFFFFFFFFFFFFFFFFFFFF  
FFFFFFFFFFFFFFFFFFFFFFFFFFFF:FFFFFFFFFFFFFFFFFFFFFFFFFFFFFFFFFFFFFFFFFFFFF  
@A00155:342:HHGFNDSXY:1:2125:1940:18004 2:N:0:GAACCTAG+TCCGCATA  
TAGGACGAAACTTACACAACCTCGAAGAGTAACGACGGTTTCGTCCTTGGAACGGACTCATCAGGGAGC  
CTACTAGACTCCGACCGTCATGGGGGTTCAAACCCATGCCCGCCACACCGCCTTAGATCAGCTGTGT  
+  
FFFFFFFFFFFFFFFFFFFF:FFFFFFFFFFFFFFFFFFFFFFFFFFFF,FFFFFFFFFFFFFFFFFFFFFFFF,FF:FFFFFF  
FFFFFFFFFFFFFFFFFFFFFFFFFFFFFFFFFFFF:FFFFFFFFFFFFFFFFFFFFFFFFFFFFFFFFFFFF:FFFFFFFF  
@A00155:342:HHGFNDSXY:1:2125:7500:22247 2:N:0:GAACCTAG+TCCGCATA  
GTGAACAAGCCCGGAGTACATCTCCTTTGGAAGTAGGAGACCCCTCCGGTCTTGTCCAACCTCTGTTT  
CGGCAGAGGATACCGTGCTCCACAGCTGTAAGGCTGTGGGCCCGAGAGAAGTCGCTCTCTCTCGCCCT  
+  
FFFFFFFFFFFFFFFFFFFFFFFFFFFFFFFFFFFFFFFFFFFFFFFFFFFFFFFFFFFFFFFFFFFFFFFFFFFF  
FFFFFFFFFFFFFFFFFFFFFFFFFFFFFFFFFFFF:FFFFFFFFFFFFFFFFFFFF,F:FFFFFFFFFFFFFFFFFFFF  
@A00155:342:HHGFNDSXY:1:2126:1994:5541 2:N:0:GAACCTAG+TCCGCATA  
GGACTCGTCAGGTAGCCTACTAGACTACGACTTACACGGTAGGTCGTGAACAAGCCCGGAGTACATCT  
CCTTTGGAACCAGGAGACCCCTCCGGTCTTGTCCAACCTCTGTTTCGGCAGAGGATACCGTGCTCCAC  
+  
F:FFFFFFFFFFFFFFFFFFFFFFFFFFFF,FFFFFFFFFFFFFFF:FFFFFFFFFFFFFFF,FFFFFFFFFFFFFFF  
FFF,FFFFFFFFFFFFFFFFFFFFFFFFFFFFFFFFFFFF:FFFFFFFFF:FFFFF:FFFFFFFFFFFFFFFFFFFF  
@A00155:342:HHGFNDSXY:1:2126:30743:25394 2:N:0:GAACCTAG+TCCGCATA  
GGTTTCGTCCTTGGAACGGACTCATCAGGGAGCCTACTAGACTCCGACCGTCATGGGGGTTCAAACCC  
ATGCCCCGCTACACCGCCTTAGATCAGCTGTGTCCACTTAAGGACTCACCTCTGGCCTATGGTCATCT  
+  
FFFFFFFFFFFFFFFFFFFFFFFFFFFFFFFFFFFFFFFFFFFFFFFFFFFFFFFFFFFFFFFFFFFFFFFFFFFF  
FFFFFFFFFFFFFFFFFFFFFFFFFFFF:FFFFFFFFFFFFFFFFFFFFFFFFFFFFFFFFFFFFFFFFFFFFF  
@A00155:342:HHGFNDSXY:1:2127:22580:3082 2:N:0:GAACCTAG+TCCGCATA  
GAACTAGGAGACCCCTCCGGTCTTGTCCAACCTCTGTTTCGGCAGAGGATACCGTGCTCCACAGCTGT  
AAGGCTGTGGGCCCGAGAGAAGTCGCTCTCTCTCGCCCTCCACATCCCTCTCGGCATTGAGATGAC  
+

FFFFFFFFFFFFFFFFFFFFFFFFFFFFFFFFFFFFFFFFFFFFFFFFFFFFFFFFFFFFFFFFFFFFFFFF  
FFFFFFFFFFFFFFFFFFFFFFFFFFFFFFFFFFFFFFFFFFFFFFFFFFFFFFFFFFFFFFFFFFFFFFFF  
@A00155:342:HHGFNDSXY:1:2127:30798:9549 2:N:0:GAACCTAG+TCCGCATA  
GTGAACAAGCCCGGAGTACATCTCCTTTGGAAGTACAGAGACCCCTCCGGTCTTGTCCAACCTCTGTTT  
CGGCAGAGGATACCGTGCTCCACAGCTGTAAGGCTGTGGGCCCGAGAGAAGTCGCTCTCTCTCGCCCT  
+  
FFFFFFFFFFFFFFFFFFFFFFFFFFFFFFFFFFFFFFFFFFFFFFFFFFFFFFFFFFFFFFFFFFFFFFFF  
FFFFFFFFFFFFFFFFFFFFFFFFFFFFFFFFFFFFFFFFFFFFFFFFFFFFFFFFFFFFFFFFFFFFFFFF  
@A00155:342:HHGFNDSXY:1:2128:24243:15515 2:N:0:GAACCTAG+TCCGCATA  
TAGACTACGACTTACACGGTAGGTCGTGAACAAGCCCGGAGTACATCTCCTTTGGAACCAGGAGACCC  
CTCCGGTCTTGTCCAACCTCTGTTTCGGCAGAGGATACCGTGCTCCACAGCTGTAAGGCTGTGGGCC  
+  
FFFFFFFFFFFFFFFFFFFFFFFFFFFFFFFFFFFFFFFFFFFFFFFFFFFFFFFFFFFFFFFFFFFFFFFF  
FFFFFFFFFFFFFFFFFFFFFFFFFFFFFFFFFFFFFFFFFFFFFFFFFFFFFFFFFFFFFFFFFFFFFFFF  
@A00155:342:HHGFNDSXY:1:2129:6497:2347 2:N:0:GAACCTAG+TCCGCATA  
GTGTAAGTTTCGTCTCTAAAAAGGACTCGTCAGGTAGCCTACTAGACTACGACTTACACGGTAGGTCGT  
GAACAAGCCCGGAGTACATCTCCTTTGGAACCAGGAGACCCCTCCGGTCTTGTCCAACCTCTGTTTCG  
+  
FFFFFFFFFFFF:FFFF:FFFFFFFFFFFFFFFFFFFF: ,FFFFFFFFFFFF: :FFFFFFFFFFFF: ,FFFFFFFFFFFF,FF  
FFFFFFFFFFFFFFFFFFFF,FF:FFFF:FFFFFFFFFFFF,FFFFFFFFFFFFFFFFFFFF,FFFFFFFF:FFFFF  
@A00155:342:HHGFNDSXY:1:2129:9489:18051 2:N:0:GAACCTAG+TCCGCATA  
CCTCTGGCCTATGGTCATCTCAATGCCGAGAGGGATGTGGAGGGCGAGAGAGAGCGACTTCTCTCGGG  
CCCACAGCCTTACAGCTGTGGAGCACGGTATCCTCTGCCGAAACAGAGGTTGGACAAGACCGGAG  
+  
FFFFF:FF,FFFFFFFFFFFF:F:FFF: :F,FFFF: :FFF:FFFFFFFF:F:F:FFFFFFFFFFFF:F:F  
 ,:FFFF,FF,FFFFFFFFFFFFFFFFFFFF,FFFFF,FFFF:FFFF:F:FFFFFFFF,FFFFFFFFFFFF,:F  
@A00155:342:HHGFNDSXY:1:2129:30879:20619 2:N:0:GAACCTAG+TCCGCATA  
GTTGTGTAAGTTTCGTCTCTAAAAAGGACTCGTCAGGTAGCCTACTAGACTACGACTTACACGGTAGGT  
CGTGAACAAGCCCGGAGTACATCTCCTTTGGAACCAGGAGACCCCTCCGGTCTTGTCCAACCTCTGT  
+  
F: ,FF:FFFF:F, ,FF:FFFFFFFF:FFFFF, :F, :FF: ,F:FFFF,F:FFF:FF:FF:F:F,F:F, ,  
FFF,FF:FF,F:FF,FFFF:F,FFFF: ,FFF:FF: ,F,FFF:F,FFFFFFFF:F,FFFF: ,FFFFF  
@A00155:342:HHGFNDSXY:1:2129:20772:24940 2:N:0:GAACCTAG+TCCGCATA  
TCAGGTAGCCTACTAGACTACGACTTACACGGTAGGTCGTGAACAAGCCCGGAGTACATCTCCTTTGG  
AACCAGGAGACCCCTCCGGTCTTGTCCAACCTCTGTTTCGGCAGAGGATACCGTGCTCCACAGCTGTA  
+  
FFFFFFFFFFFFFFFFFFFFFFFFFFFFFFFFFFFFFFFFFFFFFFFFFFFFFFFFFFFFFFFFFFFFFFFF  
FFFFFFFFFFFFFFFFFFFFFFFFFFFFFFFFFFFFFFFFFFFFFFFFFFFFFFFFFFFFFFFFFFFFFFFF  
@A00155:342:HHGFNDSXY:1:2129:12527:26349 2:N:0:GAACCTAG+TCCGCATA  
TCCAAGGACGAAACCGTCGTTACTCTTTGAGTTGTGTAAGTTTCGTCTCTAAAAAGGACTCGTCAGGTA  
GCCTACTAGACTACGACTTACACGGTAGGTCGTGAACAAGCCCGGAGTACATCTCCTTTGGAAGTACG  
+  
FFFFFFFFFFFFFFFFFFFFFFFFFFFFFFFFFFFFFFFFFFFFFFFFFFFFFFFFFFFFFFFFFFFFFFFF  
FFFFFFFFFFFFFFFFFFFFFFFFFFFFFFFFFFFFFFFFFFFFFFFFFFFFFFFFFFFFFFFFFFFFFFFF  
@A00155:342:HHGFNDSXY:1:2130:18819:1767 2:N:0:GAACCTAG+TCCGCATA  
GTGAACAAGCCCGGAGTACATCTCCTTTGGAAGTACAGAGACCCCTCCGGTCTTGTCCAACCTCTGTTT  
CGGCAGAGGATACCGTGCTCCACAGCTGTAAGGCTGTGGGCCCGAGAGAAGTCGCTCTCTCTCGCCCT  
+  
FFFFFFFFFFFFFFFFFFFFFFFFFFFFFFFFFFFFFFFFFFFFFFFFFFFFFFFFFFFFFFFFFFFFFFFF  
FFFFFFFFFFFFFFFFFFFFFFFFFFFFFFFFFFFFFFFFFFFFFFFFFFFFFFFFFFFFFFFFFFFFFFFF  
@A00155:342:HHGFNDSXY:1:2130:6054:12978 2:N:0:GAACCTAG+TCCGCATA  
GAACTAGGAGACCCCTCCGGTCTTGTCCAACCTCTGTTTCGGCAGAGGATACCGTGCTCCACAGCTGT  
AAGGCTGTGGGCCCGAGAGAAGTCGCTCTCTCTCGCCCTCCACATCCCTCTCGGCATTGAGATGAC  
+

[illegible]

```

FFFFFFFFFFFFFFFFFFFFFFFFFFFFFFFFFFFFFFFFFFFFFFFFFFFFFFFFFFFFFFFFFFFFFFFFFFFF:FFFFFFFF
FFFFFFFFFFFFFFFFFFFFFFFFFFFFFFFFFFFFFFFFFFFFFFFFFFFFFFFFFFFFFFFFFFFFFFFFFFFF
@A00155:342:HHGFNDSXY:1:2133:20356:22279 2:N:0:GAACCTAG+TCCGCATA
CTACTAGACTACGACTTACACGGTAGGTCTGTGAACAAGCCCGGAGTACATCTCCTTTGGAACCAGGAG
ACCCCTCCGGTCTTGTCCAACCTCTGTTTCGGCAGAGGATACCGTGCTCCACAGCTGTAAGGCTGTGG
+
FFFFFFFFFFFFFFFFFFFFFFFFFFFFFFFFFFFFFFFFFFFFFFFFFFFFFFFFFFFFFFFFFFFFFFFFFFFF:FFFFFFF
FFFFFFFFFFFFFFFFFFFFFFFFFFFFFFFFFFFFFFFFFFFFFFFFFFFFFFFFFFFFFFFFFFFFFFFFFFFF
@A00155:342:HHGFNDSXY:1:2134:15365:4930 2:N:0:GAACCTAG+TCCGCATA
CTTTGGAAGTAGGAGACCCCTCCGGTCTTGTCCAACCTCTGTTTCGGCAGAGGATACCGTGCTCCACA
GCTGTAAGGCTGTGGGCCCGAGAGAAGTCGCTCTCTCTCGCCCTCTACATCCCTCTCGGCATTGAGAT
+
FFFFFFFFFFFFFFFFFFFFFFFFFFFFFFFFFFFFFFFFFFFFFFFFFFFFFFFFFFFFFFFFFFFFFFFFFFFF
FFFFFFFFFFFFFFFFFFFFFFFFFFFFFFFFFFFFFFFFFFFFFFFFFFFFFFFFFFFFFFFFFFFFFFFFFFFF
@A00155:342:HHGFNDSXY:1:2134:30798:8641 2:N:0:GAACCTAG+TCCGCATA
CTACTAGACTACGACTTACACGGTAGGTCTGTGAACAAGCCCGGAGTACATCTCCTTTGGAAGTAGGA
GACCCCTCCGGTCTTGTCCAACCTCTGTTTCGGCAGAGGATACCGTGCTCCACAGCTGTAAGGCTGTG
+
FFFFFFFFFFFFFFFFFFFFFFFFFFFFFFFFFFFFFFFFFFFFFFFFFFFFFFFFFFFFFFFFFFFFFFFFFFFF
FFFFFFFFFFFFFFFFFFFFFFFFFFFFFFFFFFFFFFFFFFFFFFFFFFFFFFFFFFFFFFFFFFFFFFFFFFFF:FFFFFFF:FFFFFFF
@A00155:342:HHGFNDSXY:1:2134:15781:12258 2:N:0:GAACCTAG+TCCGCATA
AGCCCGGAGTACATCTCCTTTGGAAGTAGGAGACCCCTCCGGTCTTGTCCAACCTCTGTTTCGGCAGA
GGATACCGTGCTCCACAGCTGTAAGGCTGTGGGCCCGAGAGAAGTCGCTCTCTCTCGCCCTCCACATC
+
FFFFFFFFFFFFFFFFFFFFFFFFFFFFFFFFFFFFFFFFFFFFFFFFFFFFFFFFFFFFFFFFFFFFFFFFFFFF
FFFFFFFFFFFFFFFFFFFFFFFFFFFFFFFFFFFFFFFFFFFFFFFFFFFFFFFFFFFFFFFFFFFFFFFFFFFF:FFFFFFF:FFFFFFF:FFFFFFF
@A00155:342:HHGFNDSXY:1:2134:8784:30452 2:N:0:GAACCTAG+TCCGCATA
GTTGTGTAAGTTTTCGTCCTAAAAAGGACTCGTCAGGTAGCCTACTAGACTACGACTTACACGGTAGGT
CGTGAACAAGCCCGGAGTACATCTCCTTTGGAAGTAGGAGACCCCTCCGGTCTTGTCCAACCTCTGTT
+
FFFFFFFFFFFFF:FFFFFFFFFFFFFFFFFFFFFFFFFFFFFFFFFFFFFFFFFFFFFFFFFFFFFFFFFFFFF:FFFFFFFFFFFFF:FFFFFFFFFFFFF
FFFFFFFFFFFFFFFFFFFFFFFFFFFFFFFFFFFFFFFFFFFFFFFFFFFFFFFFFFFFFFFFFFFFFFFFFFFF:FFF,FFF,FFFFFFFFFFFFFFFFFFFF,:FFFFFFFFFFFFFFFFF:
@A00155:342:HHGFNDSXY:1:2135:25599:1141 2:N:0:GAACCTAG+TCCGCATA
TAGCCTACTAGACTACGACTTACACGGTAGGTCTGTGAACAAGCCCGGAGTACATCTCCTTTGGAAGTAGGAGACCCCTCCGGTCTTGTCCAACCTCTGTTTCGGCAGAGGATACCGTGCTCCACAGCTGTAAGGCT
+
FFFFFFFFFFFFFFFFFFFFFFFFFFFFFFFFFFFFFFFFFFFFFFFFFFFFFFFFFFFFFFFFFFFFFFFFFFFF,F:FFFFFFFFFFFFF:FFFFFFFFFFFFF
FFFFFFFFFFFFFFFFFFFFFFFFFFFFFFFFFFFFFFFFFFFFFFFFFFFFFFFFFFFFFFFFFFFFFFFFFFFF:FFFFFFFFFFFFFFFFFFFF:FFFFFFFFF
@A00155:342:HHGFNDSXY:1:2135:26603:12900 2:N:0:GAACCTAG+TCCGCATA
AAAAGGACTCGTCAGGTAGCCTACTAGACTACGACTTACACGGTAGGTCTGTGAACAAGCCCGGAGTAC
ATCTCCTTTGGAACCAGGAGACCCCTCCGGTCTTGTCCAACCTCTGTTTCGGCAGAGGATACCGTGCT
+
FFF:FFFFFFFFFFFFFFFFFFFFFFFFFFFFFFFFFFFFFFFFFFFFFFFFFFFFFFFFFFFFFFFFFFFFFFFFFFFF
FFFFFFFFFFFFFFFFFFFFFFFFFFFFFFFFFFFFFFFFFFFFFFFFFFFFFFFFFFFFFFFFFFFFFFFFFFFF:FFFFFFF
@A00155:342:HHGFNDSXY:1:2135:31521:30718 2:N:0:GAACCTAG+TCCGCATA
GGACGAACTTACACAACCTCGAAGAGTAACGACGGTTTTCGTCCTTGGAACGGACTCATCAGGGAGCCT
ACTAGACTCCGACCGTCATGGGGGTTCAAACCCATGCCCCGCCACACCGCCTTAGATCAGCTGTGTCC
+
FFFFFFFFFFFFFFFFFFFFFFFFFFFFFFFFFFFFFFFFFFFFFFFFFFFFFFFFFFFFFFFFFFFFFFFFFFFF
FFFFFFFFFFFFFFFFFFFFFFFFFFFFFFFFFFFFFFFFFFFFFFFFFFFFFFFFFFFFFFFFFFFFFFFFFFFF:FFFFFFF
@A00155:342:HHGFNDSXY:1:2135:21667:32033 2:N:0:GAACCTAG+TCCGCATA
GGTCGTGAACAAGCCCGGAGTACATCTCCTTTGGAAGTAGGAGACCCCTCCGGTCTTGTCCAACCTCT
GTTTCGGCAGAGGATACCGTGCTCCACAGCTGTAAGGCTGTGGGCCCGAGAGAAGTCGCTCTCTCTCG
+

```

FF:FFFFFFFFFFFFFFFFFFFFFFFFFFFFFFFFFFFFFFFFFFFFFFFFFFFFFFFFFFFFFFFF  
F:FFFFFFFFFFFFFF:FFFFFFFFFFFFFFFFFFFFFFFFFFFFFFFFFFFFFFFFFFFFFFFF  
@A00155:342:HHGFNDSXY:1:2135:21314:33395 2:N:0:GAACCTAG+TCCGCATA  
GGTCGTGAACAAGCCCGGAGTACATCTCCTTTGGAAGTACTAGGAGACCCCTCCGGTCTTGTCCAACCTCT  
GTTTCGGCAGAGGATACCGTGCTCCACAGCTGTAAGGCTGTGGGCCCGAGAGAAGTCGCTCTCTCTCG  
+  
FFFFFFFFFFFFFFFFFFFFFFFFFFFFFFFFFFFFFFFFFFFFFFFFFFFFFFFFFFFFFFFF  
FFFFFFFFFFFFFFFFFFFFFFFFFFFFFFFFFFFFFFFFFFFFFFFFFFFFFFFFFFFFFFFF  
@A00155:342:HHGFNDSXY:1:2136:23737:3239 2:N:0:GAACCTAG+TCCGCATA  
GTTGTGTAAGTTTCGTCTAAAAAGGACTCGTCAGGTAGCCTACTAGACTACGACTTACACGGTAGGT  
CGTGAACAAGCCCGGAGTACATCTCCTTTGGAAGTACTAGGAGACCCCTCCGGTCTTGTCCAACCTCTGTT  
+  
FFFFF,:FF,FFFFFFFFFFFFFFFFFFFFFFFFFFFFFFFFFFFFFFFFFFFFFFFFFFFFFFFF  
FFFFFFFF:FFFFFFFFFFFF:FFFFFFFF:FF:FF:FFFFFFFFFFFFFFFF:FF:FFFFFFFFFFFFFFFF  
@A00155:342:HHGFNDSXY:1:2137:6153:3537 2:N:0:GAACCTAG+TCCGCATA  
CACGGTAGGTCGTGAACAAGCCCGGAGTACATCTCCTTTGGAAGTACTAGGAGACCCCTCCGGTCTTGTCC  
AACCTCTGTTTCGGCAGAGGATACCGTGCTCCACAGCTGTAAGGCTGTGGGCCCGAGAGAAGTCGCTC  
+  
FFFFFFFFFFFFFFFFFFFFFFFFFFFFFFFFFFFFFFFFFFFFFFFFFFFFFFFFFFFFFFFF  
FFFFFFFFFFFFFFFFFFFFFFFFFFFFFFFFFFFFFFFFFFFFFFFFFFFFFFFFFFFFFFFF  
@A00155:342:HHGFNDSXY:1:2137:20238:6136 2:N:0:GAACCTAG+TCCGCATA  
TGAACAATCCCGGAGTACATCTCCTTTGGAAGTACTAGGAGACCCCTCCGGTCTTGTCCAACCTCTGTTTC  
GGCAGAGGATACCGTGCTCCACAGCTGTAAGGCTGTGGGCCCGAGAGAAGTCGCTCTCTCTCGCC  
+  
F,FF,FF,:FF,:FFFFFFFFF:,FFFF:FF,FF,FFFFFF,FFFFFF,:FFF:F,FFFF:F:FF:FF  
,::FFFF:FFF:,FFF,FFFF:,FFFF:,FFFFFF,,FFFFFFFFFFFF,FFFF:F,,FF::F  
@A00155:342:HHGFNDSXY:1:2137:16387:9361 2:N:0:GAACCTAG+TCCGCATA  
ACTCTTTGAGTTGTGTAAGTTTCGTCTAAAAAGGACTCGTCAGGTAGCCTACTAGACTACGACTTAC  
ACGGTAGGTCGTGAACAAGCCCGGAGTACATCTCCTTTGGAAGTACTAGGAGACCCCTCCGGTCTTGTCCA  
+  
FFFFFFFFFFFFFF:FFFF,FFFFFFFFFFFFFFFFFFFFFFFFFFFFFFFFFFFFFFFFFFFFFFFF  
FFFFFF,FFFFFFFFFFFFFFFFFFFFFFFFFFFFFFFFFFFFFFFFFFFFFFFFFFFFFFFFFFFFFFFF  
@A00155:342:HHGFNDSXY:1:2137:10872:13463 2:N:0:GAACCTAG+TCCGCATA  
AAAAGGACTCGTCAGGTAGCCTACTAGACTACGACTTACACGGTAGGTCGTGAACAAGCCCGGAGTAC  
ATCTCCTTTGGAAGTACTAGGAGACCCCTCCGGTCTTGTCCAACCTCTGTTTCGGCAGAGGATACCGTGCT  
+  
FFFFFFFFFFFFFFFFFFFFFFFFFFFFFFFFFFFFFFFFFFFFFFFFFFFFFFFFFFFFFFFF  
FFFFFFFFFFFFFFFFFFFFFFFFFFFFFFFFFFFFFFFFFFFFFFFFFFFFFFFFFFFFFFFF:FFFFFF:  
@A00155:342:HHGFNDSXY:1:2137:28836:22811 2:N:0:GAACCTAG+TCCGCATA  
GAGTACATCTCCTTTGGAAGTACTAGGAGACCCCTCCGGTCTTGTCCAACCTCTGTTTCGGCAGAGGATAC  
CGTGCTCCACAGCTGTAAGGCTGTGGGCCCGAGAGAAGTCGCTCTCTCTCGCCCTCCAC  
+  
FFFF,FFFFFFFFFFFFFFFFFFFFFFFFFFFFFFFFFFFFFFFFFFFFFFFFFFFFFFFFFFFFFFFF  
FFFFFFFFFFFFFFFFFFFF,FFFFFFFFFFFFFFFFFFFF:FFFFFFFFFFFFFFFFFFFFFFFF  
@A00155:342:HHGFNDSXY:1:2138:11559:31250 2:N:0:GAACCTAG+TCCGCATA  
AGTACATCTCCTTTGGAAGTACTAGGAGACCCCTCCGGTCTTGTCCAACCTCTGTTTCGGCAGAGGATACC  
GTGCTCCACAGCTGTAAGGCTGTGGGCCCGAGAGAAGTCGCTCTCTCTCGCCCTCTACATCCCTCTCG  
+  
FFFFFFFFFFFFFFFFFFFFFFFFFFFFFFFFFFFFFFFFFFFFFFFFFFFFFFFFFFFFFFFF  
FFFFFFFFFFFFFFFFFFFFFFFFFFFFFFFFFFFFFFFFFFFFFFFFFFFFFFFFFFFFFFFF  
@A00155:342:HHGFNDSXY:1:2139:7021:12900 2:N:0:GAACCTAG+TCCGCATA  
AAACCGTCGTTACTCTTCGAGTTGTGTAAGTTTCGTCTAAAAAGGACTCGTCAGGTAGCCTACTAGA  
CTACGACTTACACGGTAGGTCGTGAACAAGCCCGGAGTACATCTCCTTTGGAAGTACTAGGAGACCCCTCC  
+

```
FF: :FFFFFFFFFFFFFFFFFFFFFFFFFFFFFFFFFFFFFFFFFFFFFFFFFFFFFFFFFFFFF,FFF,FFFFFFFFF  
FFFFFFFFFFFFFFFFFFFFFFFFFFFFFFFFFFFFFFFFFFFFFFFFFFFFFFFFFFFFFFFF:F:FFF:FF:FFFFFFFFF:FF  
@A00155:342:HHGFNDSXY:1:2139:15004:27070 2:N:0:GAACCTAG+TCCGCATA  
CCTTTTAGGACGAACTTACACAACCTCGAAGAGTAACGACGGTTTCGTCTTGGAACGACTCATCA  
GGGAGCCTACTAGACTCCGACCCTCATGGGGGTTCAAACCATGCCCGCCACACCGCCTTAGATCAG  
+  
FF::FFFFFFFFFFFFFFFFFFFFFFFFFFFFFFFFFFFFFFFFFFFFFFFFFFFFFFFFFFFFFFF  
FFFFFFFFFFFFFFFFFFFFFFFFFFFFFFFFFFFFFFFFFFFFFFFFFFFFFFFFFFFFFFFF:F:FFFFFFFFF  
@A00155:342:HHGFNDSXY:1:2139:20021:31563 2:N:0:GAACCTAG+TCCGCATA  
GAACTAGGAGACCCCTCCGGTCTTGTCCAACCTCTGTTTCGGCAGAGGATAACCGTGCTCCACAGCTGT  
AAGGCTGTTGGCCCAGAGAAGTCGCTCTCTCTCGCCCTCCACATCCCTCTCGGCATTGAGATGACCA  
+  
FFFFFFFFFFFFFFFFFFFFFFFFFFFFFFFFFFFFFFFFFFFFFFFFFFFFFFFFFFFFFFF  
FFFFFFFFFFFFFFFFFFFFFFFFFFFFFFFFFFFFFFFFFFFFFFFFFFFFFFFFFFFFFFFF:F:FFFFFFFFF  
@A00155:342:HHGFNDSXY:1:2139:27471:31563 2:N:0:GAACCTAG+TCCGCATA  
CGTCAGGTAGCCTACTAGACTACGACTTACACGGTAGGTCGTGAACAAGCCCGGAGTACATCTCCTTT  
GGAActAGGAGACCCCTCCGGTCTTGTCCAACCTCTGTTTCGGCAGAGGATAACCGTGCTCCACAG  
+  
FFFFFFFFFFFFFFFFFFFFFFFFFFFFFFFFFFFFFFFFFFFFFFFFFFFFFFFFFFFF,:FFFFFFFF:FFFFFFF  
FFF:FFFFFFFFFFFFFFFFFFFFFFFFFFFFFFFFFFFFFFFFFFFFFFFFFFFFFFFFFFFF:F:FFFFFFFFF  
@A00155:342:HHGFNDSXY:1:2140:17734:16078 2:N:0:GAACCTAG+TCCGCATA  
AGTTTCGTCTAAAAAGGACTCGTCAGGTAGCCTACTAGACTACGACTTACACGGTAGGTCGTGAACA  
AGCCCGGAGTACATCTCCTTTGGAActAGGAGACCCCTCCGGTCTTGTCCAACCTCTGTTTCGGCAGA  
+  
FFFFFFFFFFFFFFFFFFFFFFFFFFFFFFFFFFFFFFFFFFFFFFFFFFFFFFFFFFFFFFF  
FFFFFFFFFFFFFFFFFFFFFFFFFFFFFFFFFFFFFFFFFFFFFFFFFFFFFFFFFFFFFFFF:F:FFFFFFFFF  
@A00155:342:HHGFNDSXY:1:2140:19669:29324 2:N:0:GAACCTAG+TCCGCATA  
GTAAGTTTCGTCTAAAAAGGACTCGTCAGGTAGCCTACTAGACTACGACTTACACGGTAGGTCGTGA  
ACAAGCTCGGAGTACATCTCCTTTGGAActAGGAGACCCCTCCGGTCTTGTCCAACCTCTGTTTCGGC  
+  
FFFFFFF:FFFFFFFF:FFFFFFFFFFFFFFFFFFFFFFFFFFFFFFFFFFFFFFFFFFFFFFFF,F  
FFFFFFFFFFFFFFFFFFFFFFFFFFFFFFFFFFFFFFFFFFFFFFFFFFFFFFFFFFFF:F:FFFFFFF:FFFFFFF:  
@A00155:342:HHGFNDSXY:1:2140:23665:30483 2:N:0:GAACCTAG+TCCGCATA  
AAAAGGACTCGTCAGGTAGCCTACTAGACTACGACTTACACGGTAGGTCGTGAACAAGCCCGGAGTAC  
ATCTCCTTTGGAActAGGAGACCCCTCCGGTCTTGTCCAACCTCTGTTTCGGCAGAGGATAACCGTGCT  
+  
FFFFFFFFFFFFFFFFFFFFFFFFFFFFFFFFFFFFFFFFFFFFFFFFFFFF:F:FFFFFFFFFFFFFFFFFFFFF  
FFFFFFFFFFFFF,FFFFFFFFFFFFFFFFFFFFFFFFFFFFFFFFFFFFFFFFFFFFFFFFFFFF:F:F:F  
@A00155:342:HHGFNDSXY:1:2141:12183:1642 2:N:0:GAACCTAG+TCCGCATA  
TAGACTACGACTTACACGGTAGGTCGTGAACAAGCCCGGAGTACATCTCCTTTGGAActAGGAGACCC  
CTCCGGTCTTGTCCAACCTCTGTTTCGGCAGAGGATAACCGTGCTCCACAGCTGTAAGGCTGTGGGCC  
+  
FFF:FFFFFFFFFFFFFFFFFFFFFFFFFFFFFFFFFFFFFFFFFFFFFFFFFFFFFFFFFFFFF  
FFFFFFFFFFFFFFFFFFFFFFFFFFFFFFFFFFFFFFFFFFFFFFFFFFFFFFFFFFFF:F:FFFFFFFFFFFFF  
@A00155:342:HHGFNDSXY:1:2141:10872:2127 2:N:0:GAACCTAG+TCCGCATA  
GTAAGTTTCGTCTAAAAAGGACTCGTAAGGTAGCCTACTAGACTACGACTTACACGGTAGGTCGTGA  
ACAAGCCCCGAGTACATCTCCTTTGGAActAGGAGACCCCTCCGGTCTTGTCCAACCTCTGTTTCGGC  
+  
FFFFFFFFFFFFFFFFFFFFFFFFFFFFFFFFFFFFFFFFFFFFFFFFFFFFFFFFFFFFF  
FFFFFFFFFFFFFFFFFFFFFFFFFFFFFFFFFFFFFFFFFFFFFFFFFFFFFFFFFFFF:F:FFFFFFFFFFFFF  
@A00155:342:HHGFNDSXY:1:2141:11397:7513 2:N:0:GAACCTAG+TCCGCATA  
CCGAGAGAAGTCGCTCTCTCTCGCCCTCCACATCCCTCTCGGCATTGAGATGACCATAGGCCAGAGGT  
GAGTCCTTAAGTGACACAGCTGATCTAAGGCGGTGTGGTGGGGCATGGGTTTGAACCC
```



```

FFFFFFFFFFF,FFFFFFFFF:FFFFFFFFF:FFFF
FFFFFFFFFFFFFFFFFFFFFFFFFFFFFFFFFFFFFFFF,FFFFFFFFFFFFFFFFFFFFFFFFFFFFFFFF
@A00155:342:HHGFNDSXY:1:2141:32805:9017 2:N:0:GAACCTAG+TCCGCATA
TCGGCAGAGGATACCGTGCTCCACAGCTGTAAGGCTGTGGGCCCGAGAGAAGTCGCTCTCTCTCGCCC
TCCACATCCCTCTCGGCATTGAGATGACCATAGGCCAGAGGTGAGTCCTTAAGTGGACACAGCTGATC
+
FFFFF:FFFFFFFFFFFFFFFFFFFFFFFFFFFFFFFFFFFFFFFF,FFFFFFFFFFFFFFFFFFFFFFFF
FFFFFFFFFFFFFFFFFFFFFFFF,FFFFFFFF:FFFFFFFFFFFFFFFFFFFFFFFFFFFFFFFF:FFFFFFFF:F,FF
@A00155:342:HHGFNDSXY:1:2141:6858:9799 2:N:0:GAACCTAG+TCCGCATA
AGTACATCTCCTTTGGAAGTAGGAGACCCCTCCGGTCTTGTCCAACCTCTGTTTCGGCAGAGGATACCG
GTGCTCCACAGCTGTAAGGCTGTGGGCCCGAGAGAAGTCGCTCTCTCTCGCCCTCCACATCCCTCTCG
+
FFFFF,:FFFFFFFFFFFFFFFFFFFFFFFFFFFFFFFFFFFFFFFFFFFFFFFFFFFFFFFFFFFFFFFF:FF:FFFFFFFF
FFFFFFFFF:F:FFFFFFFFF:FFFFFFFFFFFFFFFFFFFFFFFF,F:FFF:FFFFFFFFF:FFFFFFFF
@A00155:342:HHGFNDSXY:1:2141:19660:10238 2:N:0:GAACCTAG+TCCGCATA
ACTTACACGGTAGGTGCTGAACAAGCCCGGAGTACATCTCCTTTGGAAGTAGGAGACCCCTCCGGTCT
TGTCCAACCTCTGTTTCGGCAGAGGATACCGTGCTCCACAGCTGTAAGGCTGTGGGCCCGAGAGAAGT
+
FFFFFFFFFFFFFFFFFFFFFFFFFFFFFFFF:FFFFFFFFF:FFFFFFFFFFFFFFFFF:FFFFFFFFFFFFFFFF
FFFFFFFFFFFFFFFFFFFFFFFFFFFFFFFFFFFFFFFFFFFFFFFFFFFFFFFFFFFFFFFFFFFFFFFF
@A00155:342:HHGFNDSXY:1:2141:31295:24095 2:N:0:GAACCTAG+TCCGCATA
TACGACTTACACGGTAGGTGCTGAACAAGCCCGGAGTACATCTCCTTTGGAAGTAGGAGACCCCTCCG
GTCTTGTCCAACCTCTGTTTCGGCAGAGGATACCGTGCTCCACAGCTGTAAGGCTGTGGGCCCG
+
FFFFFFFFFFFFFFFFFFFFFFFFFFFFFFFFFFFFFFFF:FFFFFFFF:FFFFF,FFFFFFFFFFFFFFFF
FFFFFFFFFFFFFFFFFFFFFFFFFFFFFFFFFFFFFFFF:FFFFFFFFFFFFFFFFFFFFFFFF:FFFFF:F
@A00155:342:HHGFNDSXY:1:2141:22571:25426 2:N:0:GAACCTAG+TCCGCATA
GCCTACTAGACTCCGACCGTCATGGGGGTTCAAACCCATGCCCCACCACACCGCCTTAGATCAGCTGT
GTCCACTTAAGGACTCACCTCTGGCCTATGGTCATCTCAATGCCGAGAGGGATGTGGAGGGCGAGAGA
+
FFFFFFFFFFFFFFFFFFFFFFFFFFFFFFFFFFFFFFFFFFFFFFFFFFFFFFFFFFFFFFFFFFFFFFFF
FFFFFFFFFFFFFFFFFFFFFFFFFFFFFFFFFFFFFFFFFFFFFFFFFFFFFFFFFFFFFFFFFFFFFFFF
@A00155:342:HHGFNDSXY:1:2142:16966:12524 2:N:0:GAACCTAG+TCCGCATA
TCCTAAAAAGGACTCGTCAGGTAGCCTACTAGACTACGACTTACACGGTAGGTGCTGAACAAGCCCGG
AGTACATCTCCTTTGGAAGTAGGAGACCCCTCCGGTCTTGTCCAACCTCTGTTTCGGCAGAGGATACC
+
FFFFFFFFFFFFFFFFFFFFFFFFFFFFFFFFFFFFFFFFFFFFFFFFFFFFFFFFFFFFFFFFFFFFFFFF
FFFFFFFFFFFFFFFFFFFFFFFFFFFFFFFFFFFFFFFFFFFFFFFFFFFFFFFFFFFFFFFFFFFFFFFF
@A00155:342:HHGFNDSXY:1:2143:29966:1407 2:N:0:GAACCTAG+TCCGCATA
GTGAAAAAGCCCGGAGTACATCTCCTTTGGAAGTAGGAGACCCCTCCGGTCTTGTCCAACCTCTGTTT
CGGCAGAGGATACCGTGCTCCACAGCTGTAAGGCTGTGGGCCCGAGAGAAGTCGCTCTCTCTCGCCC
+
FFF:FFFFFFFFFFFFFFFFFFFFFFFFFFFFFFFFFFFFFFFFFFFFFFFFFFFFFFFFFFFFFFFF,FFFFFFFF
FFFFFFFF:FFFFFFFFFFFFFFFFFF:FF:F:FFFFFFFFFFFFFFFFFFFFFFFF:FFFFFFFFFFFFFFFF:
@A00155:342:HHGFNDSXY:1:2143:11812:9111 2:N:0:GAACCTAG+TCCGCATA
AGGACGAAACCGTCGTTACTCTTCGAGTTGTGTAAGTTTCGTCCTAAAAAGGACTCGTCAGGTAGCCT
ACTAGACTACGACTTACACGGTAGGTGCTGAACAAGCCCGGAGTACATCTCCTTTGGAAGTAGGAGAC
+
FFFFFFFFFFFFFFFFFFFFFFFF,FFFFFFFFFFFFFFFFFFFFFFFF:FFFFFFFF:FFFFFFFFFFFFFFFF:F
:FFFFFFFFF:F:FFFFFFFFF:FFFFFFFFF,FFFFFFFFFFFFFFFF:FFFF,F:FFFF:FFFF:FF
@A00155:342:HHGFNDSXY:1:2143:3992:9659 2:N:0:GAACCTAG+TCCGCATA
GGACTCGTCAGGTAGCCTACTAGACTACGACTTACACGGTAGGTGCTGAACAAGCCCGGAGTACATCT
CCTTTGGAACCAGGAGACCCCTCCGGTCTTGTCCAACCTCTGTTTCGGCAGAGGATACCGTGCTCCAC
+

```

FFFFFFFFFFFFFFFFFFFFFFFFFFFFFFFFFFFFFFFFFFFFFFFFFFFFFFFFFFFFFFFFFFFFFFFF  
FFFFFFFFFFFFFFFFFFFFFFFFFFFFFFFFFFFFFFFFFFFFFFFFFFFFFFFFFFFFFFFFFFFFFFFF,FFFFFFFFFFFF  
@A00155:342:HHGFNDSXY:1:2143:7898:13886 2:N:0:GAACCTAG+TCCGCATA  
TACTCTTCGAGTTGTGTAAGTTTCGTCTCTAAAAAGGACTCGTCAGGTAGCCTACTAGACTACGACTTA  
CACGGTAGGTCGTGAACAAGCCCGGAGTACATCTCTTTGGAAGTAGGAGACCCCTCCGGTCTTGTCC  
+  
FFFFFFFFFFFFFFFFFFFFFFFFFFFFFFFFFFFFFFFFFFFFFFFFFFFFFFFFFFFFFFFFFFFFFFFF:FFFFFFFF:FF  
FFF:FFF,:FFFFFFFFFFFFFFFF:FFFFFFFFFFFFFFFFFFFFFFFFFFFFFFFF:FFFFFFFFFFFFFFFFFFFFFFFF:  
@A00155:342:HHGFNDSXY:1:2143:4553:25786 2:N:0:GAACCTAG+TCCGCATA  
TAGGAGACCCCTCCGGTCTTGTCCAACCTCTGTTTCGGCAGAGGATACCGTGCTCCACAGCTGTAAGG  
CTGTGGGCCCGAGAGAAGTCGCTCTCTCTCGCCCTCCACATCCCTCTCGGCATTGAGATGAC  
+  
FFFFFFFFFFFFFFFFFFFFFFFFFFFFFFFFFFFFFFFFFFFFFFFFFFFFFFFFFFFFFFFFFFFFFFFF  
FFFFFFFFFFFFFFFFFFFFFFFFFFFFFFFFFFFFFFFFFFFFFFFFFFFFFFFFFFFFFFFFFFFFFFFF  
@A00155:342:HHGFNDSXY:1:2144:27579:9799 2:N:0:GAACCTAG+TCCGCATA  
AGGATACCGTGCTCCACAGCTGTAAGGCTGTGGGCCCGAGAGAAGTCGCTCTCTCTCGCCCTCCACAT  
CCCTCTCGGCATTGAGATGACCATAGGCCAGAGGTGAGTCCTTAAGTGGACACAGCTGAT  
+  
FFFFFFFFFFFFFFFFFFFFFFFFFFFFFFFFFFFFFFFFFFFFFFFFFFFFFFFFFFFFFFFFFFFFFFFF:FFFFF:FFFFFFFFF  
FFFFFFFFFFFFFFFFFFFFFFFFFFFFFFFFFFFFFFFFFFFFFFFFFFFFFFFFFFFFFFFFFFFFFFFF:FFFFFFFFF  
@A00155:342:HHGFNDSXY:1:2144:11577:33567 2:N:0:GAACCTAG+TCCGCATA  
GGACTCGTCAGGTAGCCTACTAGACTACGACTTACACGGTAGGTCGTGAACAAGCCCGGAGTACATCT  
CCTTTGGAAGTAGGAGACCCCTCCGGTCTTGTCCAACCTCTGTTTCGGCAGAGGATACCGTGCTCCAC  
+  
FFFFFFFFFFFFFFFFFFFFFFFFFFFFFFFFFFFFFFFFFFFFFFFFFFFFFFFFFFFFFFFFFFFFFFFF  
FFFFFFFFFFFFFFFFFFFFFFFFFFFFFFFFFFFFFFFFFFFFFFFFFFFFFFFFFFFFFFFFFFFFFFFF:FFFFFFFFFFFF  
@A00155:342:HHGFNDSXY:1:2145:12355:4319 2:N:0:GAACCTAG+TCCGCATA  
AGTAACGACGGTTTCGTCTTGAACGGACTCATCAGGGAGCCTACTAGACTCCGACCGTCATGGGGG  
TTCAAACCCATGCCCCACCACACCGCCTTAGATCAGCTGTGTCCACTTAAGGACTCACCTCTGGCCTA  
+  
FFFFFFFFFFFFFFFFFFFFFFFFFFFFFFFFFFFFFFFFFFFFFFFFFFFFFFFFFFFFFFFFFFFFFFFF:FFFFFFFFFFFFFFFF  
FFFFFFFFFFFFFFFFFFFFFFFFFFFFFFFFFFFFFFFFFFFFFFFFFFFFFFFFFFFFFFFFFFFFFFFFFFFFFFFF  
@A00155:342:HHGFNDSXY:1:2145:13458:5102 2:N:0:GAACCTAG+TCCGCATA  
ACCCCTCCGGTCTTGTCCAACCTCTGTTTCGGCAGAGGATACCGTGCTCCACAGCTGTAAGGCTGTGG  
GCCCGAGAGAAGTCGCTCTCTCTCGCCCTCCACATCCCTCTCGGCATTGAGATGACCATAGGCCAGAG  
+  
FFFFFFFFFFF:F:FFFFFFFFFFF:FFFFFFF:F:FFFFFFFFFFFFFFFF:FFFFF:F:FFFFFFF:FF:F:FF  
FFFFFFFFF:FFFFFFFFFFF:FFFFF,FF:FFFF:F:FFF:FFFFF:F:FFFFFFF::F,FFF,FFFF:FF  
@A00155:342:HHGFNDSXY:1:2145:12002:7842 2:N:0:GAACCTAG+TCCGCATA  
GAACTAGGAGACCCCTCCGGTCTTGTCCAACCTCTGTTTCGGCAGAGGATACCGTGCTCCACAGCTGT  
AAGGCTGTGGGCCCGAGAGAAGTCGCTCTCTCTCGCCCTCCACATCCCTCTCGGCATTGAGATGACCA  
+  
FFFFFFFFFFFFFFFFFFFFFFFFFFFFFFFFFFFFFFFFFFFFFFFFFFFFFFFFFFFFFFFFFFFFFFFF  
FFFFFFFFFFFFFFFFFFFFFFFFFFFFFFFFFFFFFFFFFFFFFFFFFFFFFFFFFFFFFFFFFFFFFFFFFFFFFFFF  
@A00155:342:HHGFNDSXY:1:2145:2718:25363 2:N:0:GAACCTAG+TCCGCATA  
GGACTCGTCAGGTAGCCTACTAGACTACGACTTACACGGTAGGTCGTGAACAAGCCCGGAGTACATCT  
CCTTTGGAAGTAGGAGACCCCTCCGGTCTTGTCCAACCTCTGTTTCGGCAGAGGATACCGTGCTCCAC  
+  
FFFFFFFFFFFFFFFFFFFFFFFFFFFFFFFFFFFFFFFFFFFFFFFFFFFFFFFFFFFFFFFFFFFFFFFF:FFFFFFFFFFFFFFFF  
FFFFFFFFFFFFFFFFFFFFFFFFFFFFFFFFFFFFFFFFFFFFFFFFFFFFFFFFFFFFFFFFFFFFFFFFFFFFFFFF  
@A00155:342:HHGFNDSXY:1:2145:20989:32142 2:N:0:GAACCTAG+TCCGCATA  
TAGGAGACCCCTCCGGTCTTGTCCAACCTCTGTTTCGGCAGAGGATACCGTGCTCCACAGCTGTAAGG  
CTGTGGGCCCGAGAGAAGTCGCTCTCTCTCGCCCTCCACATCCCTCTCGGCATTGAGATGAC  
+

[illegible]

```

FFFFFFFFFFFFFFFFFFFFFFFFFFFFFFFFFFFFFFFFFFFFF:FFFFFFFFFFFFFFFFFFFF
FFFFFFFFFFFFFFFFFFFFFFFFFFFFFFFFFFFFFFFFFFFFFFF:FFFFFFFFFFFFFFFFFFFF
@A00155:342:HHGFNDSXY:1:2147:10285:18458 2:N:0:GAACCTAG+TCCGCATA
GGACTCGTCAGGTAGCCTACTAGACTACGACTTACACGGTAGGTCGTGAACAAGCCCCGAGTACATCT
CCTTTGGAAGTAGGAGACCCCTCCGGTCTTGCCAACCTCTGTTTCGGCAGAGGATACCGTGCTCCAC
+
FFFFFFFFFF:FFFFFFFFFFFFFFFFFFFFFFFFFFFFFFFFFFFFFFFFFFFFFFFFFFFFFFFFFFFF
FFFFFFFFFFFFFFFFFFFFFFFFFFFFFFFFFFFFFFFFFFFFFFFFFFFFFFFFFFFFFFFFFFFFFFFF:F
@A00155:342:HHGFNDSXY:1:2148:17933:24251 2:N:0:GAACCTAG+TCCGCATA
CGGCAGAGGATACCGTGCTCCACAGCTGTAAGGCTGTGGGCCCGAGAGAAGTCGCTCTCTCTCGCCCT
CTACATCCCTCTCGGCATTGAGATGACCATAGGCCAGAGGTGAGTCCTTAAGTGACACAGCTGATCT
+
FFFFFFFFFFFFFFFFFFFFFFFFFFFFFFFFFFFFFFFFFFFFFFFFFFFFFFFFFFFFFFFFFFFFFFFFFFFF
FFFF:FFFFFFFFFFFFFF,FFFFFFFFFFFF:FFFFFFFFFFFFFFFFFFFFFFFFFFFFFFFFFFFFFFFF
@A00155:342:HHGFNDSXY:1:2148:23303:32362 2:N:0:GAACCTAG+TCCGCATA
TAGACTACGACTTACACGGTAGGTCGTGAACAAGCCCCGAGTACATCTCCTTTGGAAGTAGGAGACCC
CTCCGGTCTTGCCAACCTCTGTTTCGGCAGAGGATACCGTGCTCCACAGCTGTAAGGCTGTGGGCC
+
FFFFFFFFFFFFFFFFFFFF:FFFFFF:FFFFFFFFFFFFFFFFFFFFFFFFFFFFFFFFFFFFFFFFFFFF:FFFFFFFF
FFFFFFFFFFFFFFFFFFFFFFFFFFFFFFFFFFFFFFFFFFFFFFFFFFFFFFFFFFFFFFFFFFFFFFFFFFFF
@A00155:342:HHGFNDSXY:1:2149:30318:18740 2:N:0:GAACCTAG+TCCGCATA
GTCCACTTAAGGACTCACCTCTGGCCTATGGTCATCTCAATGCCGAGAGGGATGTGGAGGGCGAGAGA
GAGCGACTTCTCTCGGGCCCACAGCCTTACAGCTGTGGAGCACGGTATCCTCTGCCGAACAGAGGTT
+
FFFFFFFFFFFFFFFFFFFFFFFFFFFFFFFFFFFFFFFFFFFFFFFFFFFFFFFFFFFFFFFFFFFFFFFFFFFF,F
FFFFFFFFFFFFFFFFFFFFFFFFFFFFFFFFFFFFFFFFFFFFFFFFFFFFFFFFFFFFFFFFFFFFFFFFFFFFF
@A00155:342:HHGFNDSXY:1:2151:20708:16219 2:N:0:GAACCTAG+TCCGCATA
GTTGTGTAAGTTTTCGTCCTAAAAAGGACTCGTCAGGTAGCCTACTAGACTACGACTTACACGGTAGGT
CGTGAACAAGCCCCGAGTACATCTCCTTTGGAAGTAGGAGACCCCTCCGGTCTTGCCAACCTCTGTT
+
F:FFFFFFFFFFFFFFFFFFFFFFFFFFFFFFFFFFFFFFFFFFFFFFFFFFFFFFFFFFFFFFFFFFFFFFFFFFFF
FFFFFFFFFFFFFFFFFFFFFFFFFFFFFFFFFFFFFFFFFFFFFFFFFFFFFFFFFFFFFFFFFFFFFFFFFFFF:
FF:FFFFFFFFFFFFFFFFFFFFFFFFFFFFFFFFFFFFFFFFFFFFFFFFFFFFFFFFFFFFFFFFFFFF
@A00155:342:HHGFNDSXY:1:2152:6569:15405 2:N:0:GAACCTAG+TCCGCATA
TAGGTCGTGAACAAGCCCCGAGTACATCTCCTTTGGAAGTTGGAGACCCCTCCGGTCTTGCCAACCT
CTGTTTCGGCAGAGGATACCGTGCTCCACAGCTGTAAGGCTGTGGGCCCGAGAGAAGTCGCTCTCTCT
+
FFFFFFFFFFFFFFFFFFFF:FFFFFFFFFFFFFFFFFFFFFFFFFFFFFFFFFFFFFFFFFFFFFFFFFFFF,F
FFFFFFFFFFFFFFFFFFFFFFFFFFFFFFFFFFFFFFFFFFFFFFFFFFFFFFFFFFFFFFFFFFFFFFFFFFFF:
FFFFFFFFFFFFFFFFFFFFFFFFFFFFFFFFFFFFFFFFFFFFFFFFFFFFFFFFFFFFFFFFFFFF:FFFF
@A00155:342:HHGFNDSXY:1:2152:3857:17096 2:N:0:GAACCTAG+TCCGCATA
ATCTCCTTTGGAAGTAGGAGACCCCTCCGGTCTTGCCAACCTCTGTTTCGGCAGAGGATACCGTGCT
CCACAGCTGTAAGGCTGTGGGCCCGAGAGAAGTCGCTCTCTCTCGCCCTCCACATCCCTCTCGGCATT
+
FFFFFFFFFFFFFFFFFFFFFFFFFFFFFFFFFFFFFFFFFFFFFFFFFFFFFFFFFFFFFFFFFFFFFFFFFFFF:
FFFFFFFFFFFFFFFFFFFFFFFFFFFFFFFFFFFFFFFFFFFFFFFFFFFFFFFFFFFFFFFFFFFFFFFFFFFF,FF
@A00155:342:HHGFNDSXY:1:2152:32235:17801 2:N:0:GAACCTAG+TCCGCATA
AGTACATCTCCTTTGGAAGTAGGAGACCCCTCCGGTCTTGCCAACCTCTGTTTCGGCAGAGGATACC
GTGCTCCACAGCTGTAAGGCTGTGGGCCCGAGAGAAGTCGCTCTCTCTCGCCCTCCACATCCCTCTC
+
FFF,FFFFFFFFFFFFFFFFFFFF:FFFFFFFFFFFFFFFFFFFFFFFFFFFFFFFFFFFFFFFFFFFFFFFF:F:FFFF,F:FF
FFFFFFFFFFFFFFFFFFFFFFFFFFFFFFFFFFFFFFFFFFFFFFFFFFFFFFFFFFFFFFFFFFFFFFFFFFFF:
FFFFFFFFFFFFFFFFFFFFFFFFFFFFFFFFFFFFFFFFFFFFFFFFFFFFFFFFFFFFFFFFFFFF
@A00155:342:HHGFNDSXY:1:2152:4463:20369 2:N:0:GAACCTAG+TCCGCATA
AGTACATCTCCTTTGGAAGTAGGAGACCCCTCCGGTCTTGCCAACCTCTGTTTCGGCAGAGGATACC
GTGCTCCACAGCTGTAAGGCTGTGGGCCCGAGAGAAGTCGCTCTCTCTCGCCCTCTACATCCCTCTCG
+

```

[illegible]

[illegible]

FFFFFFFFFFFFFFFFFFFFFFFFFFFFFFFFFFFFFFFF,FF:FFFFFFFFFFFFFFFF:FFFFFFFFFFFF  
FFFFFFFFFFFFFFFFFFFFFFFFFFFFFFFFFFFFFFFF, :FFFFFFFFFFFFFFFFFFFFFFFFFFFFFFFFFFFF  
@A00155:342:HHGFNDSXY:1:2158:11397:14152 2:N:0:GAACCTAG+TCCGCATA  
GTACATCTCCTTTGGAAGTACGAGACCCCTCCGGTCTTGTCCAACCTCTGTTTCGGCAGAGGATACCG  
TGCTCCACAGCTGTAAGGCTGTGGGCCCGAGAGAAGTCGCTCTCTCTCGCCCTCTACATCCCTCTCGG  
+  
FFFFFFFFFFFFFFFFFFFFFFFFFFFFFFFFFFFFFFFFFFFFFFFFFFFFFFFFFFFFFFFFFFFFFFFFFFFF  
FFFFFFFFFFFFFFFFFFFFFFFFFFFFFFFFFFFFFFFFFFFFFFFFFFFFFFFFFFFFFFFFFFFFFFFFFFFF  
@A00155:342:HHGFNDSXY:1:2158:10185:16407 2:N:0:GAACCTAG+TCCGCATA  
GGAGTACATCTCCTTTGGAAGTACGAGACCCCTCCGGTCTTGTCCAACCTCTGTTTCGGCAGAGGATA  
CCGTGCTCCACAGCTGTAAGGCTGTGGGCCCGAGAGAAGTCGCTCTCTCTCGCCCTCCAC  
+  
FFFFFFFFFFFFFFFFFFFFFFFFFFFFFFFFFFFFFFFF:FFFFFFFFFFFFFFFFFFFFFFFFFFFFFFFFFFFF  
FFFFFFFFFFFFFFFFFFFFFFFFFFFFFFFFFFFFFFFFFFFFFFFFFFFFFFFFFFFFFFFFFFFFFFFFFFFF  
@A00155:342:HHGFNDSXY:1:2158:12111:26663 2:N:0:GAACCTAG+TCCGCATA  
CCTACTAGACTACGACTTACACGGTAGGTCGTGAACAAGCCCGAGTACATCTCCTTTGGAAGTACGAG  
GACCCCTCCGGTCTTGTCCAACCTCTGTTTCGGCAGAGGATACCGTGTCTCCACAGCTGTAAGGCTGTG  
+  
FFFFFFFFFFFFFFFFFFFFFFFFFFFFFFFFFFFFFFFF:FFFFFFFFFFFFFFFFFFFFFFFFFFFFFFFFFFFF  
FFFFFFFFFFFFFFFFFFFFFFFFFFFFFFFFFFFFFFFF:FFFFFFFFFFFFFFFFFFFFFFFFFFFFFFFFFFFF  
@A00155:342:HHGFNDSXY:1:2159:27950:29168 2:N:0:GAACCTAG+TCCGCATA  
ACTAGACTACGACTTACACGGTAGGTCGTGAACAAGCCCGAGTACATCTCCTTTGGAAGTACGAGAC  
CCCTCCGGTCTTGTCCAACCTCTGTTTCGGCAGAGGATACCGTGTCTCCACAGCTGTAAGGCTGTGGGC  
+  
FFFFFFFFFFFFFFFFFFFFFFFFFFFFFFFFFFFFFFFF:FFFFFFFFFFFFFFFFFFFFFFFFFFFFFFFFFFFF  
FFFFFFFFFFFF:FFFFFFFFFFFFFFFFFFFFFFFFFFFFFFFFFFFFFFFF:FFFFFFFFFFFFFFFFFFFF  
@A00155:342:HHGFNDSXY:1:2159:26982:30812 2:N:0:GAACCTAG+TCCGCATA  
ACTAGACTACGACTTACACGGTAGGTCGTGAACAAGCCCGAGTACATCTCCTTTGGAAGTACGAGAC  
CCCTCCGGTCTTGTCCAACCTCTGTTTCGGCAGAGGATACCGTGTCTCCACAGCTGTAAGGCTGTGGGC  
+  
FFFFFFFFFFFFFFFFFFFFFFFFFFFFFFFFFFFFFFFF:FFFFF  
FFFFFFFFFFFFFFFFFFFFFFFFFFFFFFFFFFFFFFFF:FFFFFFFFFFFFFFFFFFFF  
@A00155:342:HHGFNDSXY:1:2159:20907:36385 2:N:0:GAACCTAG+TCCGCATA  
GTACATCTCCTTTGGAAGTACGAGACCCCTCCGGTCTTGTCCAACCTCTGTTTCGGCAGAGGATACCG  
TGCTCCACAGCTGTAAGGCTGTGGGCCCGAGAGAAGTCGCTCTCTCTCGCCCTCCACATCCATCTCG  
+  
:,F:FF:FF:FF,F,FFF,F:,,:::FFF:FFFF:,:::FF:F:F:,FF:F::,FFF:,F::F,FF,F  
F,FF,FF:F::FF,FF::F::FF,,FF,:FFF:,FFF,F:,,:FF,,F,FF:F:FF:,,:F,FFF  
@A00155:342:HHGFNDSXY:1:2160:23918:12289 2:N:0:GAACCTAG+TCCGCATA  
GGAGTACATCTCCTTTGGAAGTACGAGACCCCTCCGGTCTTGTCCAACCTCTGTTTCGGCAGAGGATA  
CCGTGCTCCACAGCTGTAAGGCTGTGGGCCCGAGAGAAGTCGCTCTCTCTCGCCCTCCACATCCCTCT  
+  
FFFFFFFFFFFFFFFFFFFFFFFFFFFFFFFF:FFFFFFFFFFFF:FFFFFFFFFFFF:FFFFFFFFFFFFFFFFFFFF  
FFFFFFFFFFFFFFFFFFFFFFFFFFFFFFFFFFFFFFFF:F:FFFFFFFFFFFF:FFFFFFFFFFFFFFFFFFFF  
@A00155:342:HHGFNDSXY:1:2160:23927:12367 2:N:0:GAACCTAG+TCCGCATA  
GGAGTACATCTCCTTTGGAAGTACGAGACCCCTCCGGTCTTGTCCAACCTCTGTTTCGGCAGAGGATA  
CCGTGCTCCACAGCTGTAAGGCTGTGGGCCCGAGAGAAGTCGCTCTCTCTCGCCCTCCACATCCCTCT  
+  
FFFFFFFFFFFFFFFFFFFF,FFFFFFFFFFFFFFFFFFFFFFFFFFFFFFFF:FFFFFFFFFFFFFFFFFFFF:FFFFF  
FFFFFFFFFFFFFFFFFFFFFFFFFFFFFFFFFFFFFFFF:FFFFFFFFFFFFFFFFFFFFFFFFFFFFFFFFFFFF  
@A00155:342:HHGFNDSXY:1:2160:26666:18490 2:N:0:GAACCTAG+TCCGCATA  
GAAGTACGAGACCCCTCCGGTCTTGTCCAACCTCTGTTTCGGCAGAGGATACCGTGTCTCCACAGCTGT  
AAGGCTGTGGGCCCGAGAGAAGTCGCTCTCTCTCGCCCTCCACATCCCTCTCGGCATTGAGATGACCA  
+

```
FF:FFFFFFFFFFFFFFFFFFFFFFFFFFFFFFFFFFFFFFFFFFFFFFFFFFFFFFFFFFFFFFFFFFFFFFFFF:FFFFFFFFFFFFFFFFFFFFFFFFFFFFFFFFFFFFFFFFFFFFFFFFFFFFFFFFFFFFFFFFFFF  

FFFFFFFFFFFFFFFFFFFFFFFFFFFFFFFFFFFFFFFFFFFFFFFFFFFFFFFFFFFFFFFFFFFFFFFFFFFFFFFFFFFFFFFFFFFFFFFFFFFFFFFFFFFFFFFFFFFFFFFFFFFFFFFFFFFFFFFFFFFFFFFFFFFFFFFF  

@A00155:342:HHGFNDSXY:1:2160:23149:20854 2:N:0:GAACCTAG+TCCGCATA  

TAGGAGACCCCTCCGGTCTTGTTCCAACCTCTGTTCGGCAGAGGATACCGTGCTCCACAGCTGTAAGG  

CTGTGGGCCCGAGAGAAGTCGCTCTCTCTCGCCCTCCACATCCCTCTCGGCATTGAGATGACCATAGG  

+  

FFFFFFFFFFFFFFFFFFFFFFFFFFFFFFFFFFFFFFFFFFFFFFFFFFFFFFFFFFFFFFFFFFFFFFFFFFFFFFFFFFFFFFFFFFFFFFFFFFFFFFFFFFFFFFFFFFFFFFFFFFFFFFFFFFFFFFFFFFFFFFFFFFFFFFFF  

F:FFFFFFFFFFFFFFFFFFFFFFFFFFFFFFFFFFFFFFFFFFFFFFFFFFFFFFFFFFFFFFFFFFFFFFFFFFFFFFFFFFFFFFFFFFFFFFFFFFFFFFFFFFFFFFFFFFFFFFFFFFFFFFFFFFFFFFFFFFFFFFFFFFFFFFFF  

@A00155:342:HHGFNDSXY:1:2161:31051:3881 2:N:0:GAACCTAG+TCCGCATA  

GACGAAACCGTCGTTACTCTTCGAGTTGTGTAAGTTTCGTCCTAAAAAGGACTCGTCAGGTAGCCTAC  

TAGACTACGACTTACACGGTAGGTCTGTAACAAGCCCGAGTACATCTCCTTTGGAACCAGGAGACCC  

+  

F:FFFFFFFFFFFFFFFFFFFFFFFFFFFFFFFFFFFFFFFFFFFFFFFFFFFFFFFFFFFFFFFFFFFFFFFFFFFFFFFFFFFFFFFFFFFFFFFFFFFFFFFFFFFFFFFFFFFFFFFFFFFFFFFFFFFFFFFFFFFFFFFFFFFFFFFF  

FFFFFFFFFFFFFFFFFFFFFFFFFFFFFFFFFFFFFFFFFFFFFFFFFFFFFFFFFFFFFFFFFFFFFFFFFFFFFFFFFFFFFFFFFFFFFFFFFFFFFFFFFFFFFFFFFFFFFFFFFFFFFFFFFFFFFFFFFFFFFFFFFFFFFFFF  

@A00155:342:HHGFNDSXY:1:2161:24677:26099 2:N:0:GAACCTAG+TCCGCATA  

AGCCCGGAGTACATCTCCTTTGGAAGTACGAGACCCCTCCGGTCTTGTTCCAACCTCTGTTCGGCAGA  

GGATACCGTGCTCCACAGTTGTAAGGCTGTGGGCCCGAGAGAAGTCGCTCTCTCTCGCCCTCCACATC  

+  

FFFFFFFFFFFFFFFFFFFFFFFFFFFFFFFFFFFFFFFFFFFFFFFFFFFFFFFFFFFFFFFFFFFFFFFFFFFFFFFFFFFFFFFFFFFFFFFFFFFFFFFFFFFFFFFFFFFFFFFFFFFFFFFFFFFFFFFFFFFFFFFFFFFFFFFF  

FFFFFFFFFFFFFFFFFFFFFFFFFFFFFFFFFFFFFFFFFFFFFFFFFFFFFFFFFFFFFFFFFFFFFFFFFFFFFFFFFFFFFFFFFFFFFFFFFFFFFFFFFFFFFFFFFFFFFFFFFFFFFFFFFFFFFFFFFFFFFFFFFFFFFFFF  

@A00155:342:HHGFNDSXY:1:2161:14913:28260 2:N:0:GAACCTAG+TCCGCATA  

GCTGTGTCCACTTAAGGACTCACCTCTGGCCTATGGTCATCTCAATGCCGAGAGGGATGTAGAGGGCG  

AGAGAGAGCGACTTCTCTCGGGCCCACAGCCTTACAGCTGTGGAGCACGGTATCCTCTGCCGAAACAG  

+  

FFFFFFFFFFFFFFFFFFFFFFFFFFFFFFFFFFFFFFFFFFFFFFFFFFFFFFFFFFFFFFFFFFFFFFFFFFFFFFFFFFFFFFFFFFFFFFFFFFFFFFFFFFFFFFFFFFFFFFFFFFFFFFFFFFFFFFFFFFFFFFFFFFFFFFFF  

FFFFFFFFFFFFFFFFFFFFFFFFFFFFFFFFFFFFFFFFFFFFFFFFFFFFFFFFFFFFFFFFFFFFFFFFFFFFFFFFFFFFFFFFFFFFFFFFFFFFFFFFFFFFFFFFFFFFFFFFFFFFFFFFFFFFFFFFFFFFFFFFFFFFFFFF  

@A00155:342:HHGFNDSXY:1:2161:20193:30044 2:N:0:GAACCTAG+TCCGCATA  

GGACTCGTCAGGTAGCCTACTAGACTACGACTTACACGGTAGGTCTGTAACAAGCCCGGAGTACATCT  

CCTTTGGAAGTACGAGACCCCTCCGGTCTTGTTCCAACCTCTGTTCGGCAGAGGATACCGTGCTCCAC  

+  

FFFFFFFFFFFFFFFFFFFFFFFFFFFFFFFFFFFFFFFFFFFFFFFFFFFFFFFFFFFFFFFFFFFFFFFFFFFFFFFFFFFFFFFFFFFFFFFFFFFFFFFFFFFFFFFFFFFFFFFFFFFFFFFFFFFFFFFFFFFFFFFFFFFFFFFF  

FFFFFFFFFFFFFFFFFFFFFFFFFFFFFFFFFFFFFFFFFFFFFFFFFFFFFFFFFFFFFFFFFFFFFFFFFFFFFFFFFFFFFFFFFFFFFFFFFFFFFFFFFFFFFFFFFFFFFFFFFFFFFFFFFFFFFFFFFFFFFFFFFFFFFFFF  

@A00155:342:HHGFNDSXY:1:2162:4924:9893 2:N:0:GAACCTAG+TCCGCATA  

TCCTAAAAAGGACTCGTCAGGTAGCCTACTAGACTACGACTTACACGGTAGGTCTGTAACAAGCCCGG  

AGTACATCTCCTTTGGAAGTACGAGACCCCTCCGGTCTTGTTCCAACCTCTGTTCGGCAGAGGATACC  

+  

FFFFFFFFFFFFFFFFFFFFFFFFFFFFFFFFFFFFFFFFFFFFFFFFFFFFFFFFFFFFFFFFFFFFFFFFFFFFFFFFFFFFFFFFFFFFFFFFFFFFFFFFFFFFFFFFFFFFFFFFFFFFFFFFFFFFFFFFFFFFFFFFFFFFFFFF  

FFFFFFFFFFFFFFFFFFFFFFFFFFFFFFFFFFFFFFFFFFFFFFFFFFFFFFFFFFFFFFFFFFFFFFFFFFFFFFFFFFFFFFFFFFFFFFFFFFFFFFFFFFFFFFFFFFFFFFFFFFFFFFFFFFFFFFFFFFFFFFFFFFFFFFFF  

@A00155:342:HHGFNDSXY:1:2162:2121:17472 2:N:0:GAACCTAG+TCCGCATA  

GGACTCGTCAGGTAGCCTACTAGACTACGACTTACACGGTAGGTCTGTAACAAGCCCGGAGTACATCT  

CCTTTGGAAGTACGAGACCCCTCCGGTCTTGTTCCAACCTCTGTTCGGCAGAGGATACCGTGCTCCAC  

+  

FFFFFFFFFFFFFFFFFFFFFFFFFFFFFFFFFFFFFFFFFFFFFFFFFFFFFFFFFFFFFFFFFFFFFFFFFFFFFFFFFFFFFFFFFFFFFFFFFFFFFFFFFFFFFFFFFFFFFFFFFFFFFFFFFFFFFFFFFFFFFFFFFFFFFFFF  

FFFFFFFFFFFFFFFFFFFFFFFFFFFFFFFFFFFFFFFFFFFFFFFFFFFFFFFFFFFFFFFFFFFFFFFFFFFFFFFFFFFFFFFFFFFFFFFFFFFFFFFFFFFFFFFFFFFFFFFFFFFFFFFFFFFFFFFFFFFFFFFFFFFFFFFF  

@A00155:342:HHGFNDSXY:1:2163:30147:6073 2:N:0:GAACCTAG+TCCGCATA  

CGTCGTTACTCTTTGAGTTGTGTAAGTTTCGTCCTAAAAAGGACTCGTCAGGTAGCCTACTAGACTAC  

GACTTACACGGTAGGTCTGTAACAAGCCCGGAGTACATCTCCTTTGGAAGTACGAGACCCCTCCGGTC  

+  

FFFFFFFFFFFFFFFFFFFFFFFFFFFFFFFFFFFFFFFFFFFFFFFFFFFFFFFFFFFFFFFFFFFFFFFFFFFFFFFFFFFFFFFFFFFFFFFFFFFFFFFFFFFFFFFFFFFFFFFFFFFFFFFFFFFFFFFFFFFFFFFFFFFFFFFF  

FFFFFFFFFFFFFFFFFFFFFFFFFFFFFFFFFFFFFFFFFFFFFFFFFFFFFFFFFFFFFFFFFFFFFFFFFFFFFFFFFFFFFFFFFFFFFFFFFFFFFFFFFFFFFFFFFFFFFFFFFFFFFFFFFFFFFFFFFFFFFFFFFFFFFFFF  

@A00155:342:HHGFNDSXY:1:2163:6126:17613 2:N:0:GAACCTAG+TCCGCATA  

ACACGGTAGGTCTGTAACAAGCCCGGAGTACATCTCCTTTGGAACCAGGAGACCCCTCCGGTCTTGTC  

CAACCTCTGTTCGGCAGAGGATACCGTGCTCCACAGCTGTAAGGCTGTGGGCCCGAGAGAAGTCGCT  

+
```



[illegible]

```

FFFFFFFFFFFFFFFFFFFFFFFFFFFFFFFFFFFFFFFFFFFFFFFFFFFFFFFFFFFFFFFFFFFFF:FFFFFFFFFFFFFFFFFFFFFFFFFFFFFFFFFFFFF
FFFFFFFFFFFFFFFFFFFFFFFFFFFFFFFFFFFFFFFFFFFFFFFFFFFFFFFFFFFFFFFFFFFFFFFFF:FFFFFFFFFFFFFFFFFFFFFFFFFFFFFFFFFFFFF
@A00155:342:HHGFNDSXY:1:2168:19732:35540 2:N:0:GAACCTAG+TCCGCATA
ACATCTCCTTTGGAAGTAGGAGACCCCTCCGGTCTTGTC AACCTCTGTTTCGGCAGAGGATACCGTG
CTCCACAGCTGTAAGGCTGTGGGCCCGAGAGAAGTCGCTCTCTCTCGCCCTCCACATCCC
+
FFFFFFFFFFFFFF:FFFFFFFFFFFFFFFFFFFFFFFFFFFFFFFFFFFFFFFFFFFFFFFFFFFFFFFFFFFFFFFFFFFFF:FFFFFFFFFFFFFFFFFFFFFFFFFFFFFFFFFFFFF
FFFFFFFFFFFFFFFFFFFFFFFF:F:FFFFFFFFFFFFFFFFFFFFFFFFFFFFFFFFFFFFFFFFFFFFFFFFFFFFFFFFFFFFFFFFFFFFF:FFF:F
@A00155:342:HHGFNDSXY:1:2169:21314:11600 2:N:0:GAACCTAG+TCCGCATA
CTCGAAGAGTAACGACGGTTTCGTCCTTGGAACGGA CTACAGGGAGCCTACTAGACTCCGACCCTG
ATGGGGGTTCAAACCCATGCCCGCCACACCGCCTTAGATCAGCTGTGTCCA CTTAAGGACTCACCTC
+
FFFFFFFFFFFFFFFFFFFFFFFFFFFFFFFFFFFFFFFFFFFFFFFFFFFFFFFFFFFFFFFFFFFFFFFFFFFFFFFFFFFFFFFFFFFFFFFFFFFFFFFFFFFFFFFFFFFFF
,F,FFFFFFFFFFFFFFFFFFFFFFFFFFFFFFFFFFFFFFFFFFFFFFFFFFFFFFFFFFFFFFFFFFFFFFFFF,FF:FFFFFFFFFFFFFFFFFFFFFFFFFFFFFFFFFFFFF
@A00155:342:HHGFNDSXY:1:2169:4716:24001 2:N:0:GAACCTAG+TCCGCATA
GTGAACAAGCCCGGAGTACATCTCCTTTGGAAGTAGGAGACCCCTCCGGTCTTGTC AACCTCTGTTT
CGGCAGAGGATACCGTGCTCCACAGCTGTAAGGCTGTGGGCCCGAGAGAAGTCGCTCTCTCTCGCCC
+
FFFFFFFFFFFFFFFFFFFFFFFFFFFFFFFFFFFFFFFFFFFFFFFFFFFFFFFFFFFFFFFFFFFFFFFFFFFFFFFFFFFFFFFFFFFFFFFFFFFFFFFFFFFFFFFFFFFFF
FFFFFFFFFFFFFFFFFFFFFFFFFFFFFFFFFFFFFFFFFFFFFFFFFFFFFFFFFFFFFFFFFFFFFFFFFFFFFFFFFFFFFFFFFFFFFFFFFFFFFFFFFFFFFFFFFFFFF
@A00155:342:HHGFNDSXY:1:2169:1145:28557 2:N:0:GAACCTAG+TCCGCATA
GGA CTCTCAGGTAGCCTACTAGACTACGACTTACACGGTAGGTCGTGAACAAGCCCGGAGTACATCT
CCTTTGGAACCAGGAGACCCCTCCGGTCTTGTC AACCTCTGTTTCGGCAGAGGATACCGTGCTCCAC
+
FFFFF:F,FFFFFFFFF:FF:FFFF,F,FFFFF,FFFFFFFFFFFFFFFFFFFFF,F,,F:FFF:FFF,,F:F
FF:FFFF:FF,FFF,:FF:FFF::FFFFFFFFFFFFF,:F:FFFFFFFFFFFF,F,FFFFF,FFFFFFFFFFFF,F
@A00155:342:HHGFNDSXY:1:2169:3224:31908 2:N:0:GAACCTAG+TCCGCATA
GAGACCCCTCCGGTCTTGTC AACCTCTGTTTCGGCAGAGGATACCGTGCTCCACAGCTGTAAGGCTG
TGGGCCCGAGAGAAGTCGCTCTCTCTCGCCCTCCACATCCCTCTCGGCATTGAGATGACCATAGG
+
FFFFFFFFFFFFFFFFFFFFFFFFFFFFFFFFFFFFFFFFFFFFFFFFFFFFFFFFFFFFFFFFFFFFFFFFFFFFFFFFFFFFFFFFFFFFFFFFFFFFFFFFFFFFFFFFFFFFF
FFFFFFFFFFFFFFFFFFFFFFFFFFFFFFFFFFFFFFFFFFFFFFFFFFFFFFFFFFFFFFFFFFFFFFFFFFFFFFFFFFFFFFFFFFFFFFFFFFFFFFFFFFFFFFFFFFFFF
@A00155:342:HHGFNDSXY:1:2169:26946:34914 2:N:0:GAACCTAG+TCCGCATA
GAAACCGTCGTTACTCTTCGAGTTGTGTAAGTTTCGTCCTAAAAAGGACTCGTCAGGTAGCCTACTAG
ACTACGACTTACACGGTAGGTCGTGAACAAGCCCGGAGTACATCTCCTTTGGAAGTAGGAGACCCCTC
+
FFFFFFFFFFFFFFFFFFFFFFFFFFFFFFFFFFFFFFFFFFFFFFFFFFFFFFFFFFFFFFFFFFFFFFFFFFFFFFFFFFFFFFFFFFFFFFFFFFFFFFFFFFFFFFFFFFFFF
FFFFFFFFFFFFFFFFFFFFFFFFFFFFFFFFFFFFFFFFFFFFFFFFFFFFFFFFFFFFFFFFFFFFFFFFFFFFFFFFFFFFFFFFFFFFFFFFFFFFFFFFFFFFFFFFFFFFF
@A00155:342:HHGFNDSXY:1:2170:28402:6715 2:N:0:GAACCTAG+TCCGCATA
GAGACCCCTCCGGTCTTGTC AACCTCTGTTTCGGCAGAGGATACCGTGCTCCACAGCTGTAAGGCTG
TGGGCCCGAGAGAAGTCGCTCTCTCTCGCCCTCTACATCCCTCTCGGCATTGAGATGACCATAG
+
FFFFFFFFFFFFFFFFFFFFFFFFFFFFFFFFFFFFFFFFFFFFFFFFFFFFFFFFFFFFFFFFFFFFFFFFFFFFFFFFFFFFFFFFFFFFFFFFFFFFFFFFFFFFFFFFFFFFF
FFFFFFFFFFFFFFFFFFFFFFFFFFFFFFFFFFFFFFFFFFFFFFFFFFFFFFFFFFFFFFFFFFFFFFFFFFFFFFFFFFFFFFFFFFFFFFFFFFFFFFFFFFFFFFFFFFFFF
@A00155:342:HHGFNDSXY:1:2170:2998:8750 2:N:0:GAACCTAG+TCCGCATA
CGTCCTAAAAAGGACTCGTCAGGTAGCCTACTAGACTACGACTTACACGGTAGGTCGTGAACAAGCCC
GGAGTACATCTCCTTTGGAACCAGGAGACCCCTCCGGTCTTGTC AACCTCTGTTTCGGCAGAGGATA
+
FFFFFFFFFFFFFFFFFFFFFFFFFFFFFFFFFFFFFFFFFFFFFFFFFFFFFFFFFFFFFFFFFFFFFFFFFFFFFFFFFFFFFFFFFFFFFFFFFFFFFFFFFFFFFFFFFFFFF
FFFFFFFFFFFFFFFFFFFFFFFFFFFFFFFFFFFFFFFFFFFFFFFFFFFFFFFFFFFFFFFFFFFFFFFFFFFFFFFFFFFFFFFFFFFFFFFFFFFFFFFFFFFFFFFFFFFFF
@A00155:342:HHGFNDSXY:1:2170:3242:9361 2:N:0:GAACCTAG+TCCGCATA
CGTCCTAAAAAGGACTCGTCAGGTAGCCTACTAGACTACGACTTACACGGTAGGTCGTGAACAAGCCC
GGAGTACATCTCCTTTGGAACCAGGAGACCCCTCCGGTCTTGTC AACCTCTGTTTCGGCAGAGGATA
+

```

```

FFFFFFFFFFFFFFFFFFFFFFFFFFFFFFFFFFFFFFFFFFFFFFFFFFFFFFFFFFFFFFFFFFFFFFFFFFFFF:FFFFFFFFF
FFFFFFFFFFFFFFFFFFFFFFFFFFFFFFFFFFFFFFFFFFFFFFFFFFFFFFFFFFFFFFFFFFFFFFFFFFFFFFFFF
@A00155:342:HHGFNDSXY:1:2170:28736:9893 2:N:0:GAACCTAG+TCCGCATA
AGGACGAAACTTACACAACCTCGAAGAGTAACGACGGTTTCGTCTTGGAACGGACTCATCAGGGAGCC
TACTAGACTCCGACCGTCATGGGGGTTTAAACCCATGCCCGCCACACCGCCTTAGATCAGCT
+
FFFFFFFFFFFFFFFFFFFFFFFFFFFFFFFFFFFFFFFFFFFFFFFFFFFFFFFFFFFFFFFFFFFFFFFFFFFFFFFFF
FFFFFFFFFFFFFFFFFFFFFFFFFFFFFFFFFFFFFFFFFFFFFFFFFFFFFFFFFFFFFFFFFFFFFFFFFFFFFFFFF
@A00155:342:HHGFNDSXY:1:2170:16378:28134 2:N:0:GAACCTAG+TCCGCATA
GAAACCGTCGTTACTCTTTGAGTTGTGTAAGTTTCGTCTTAAAAAGGACTCGTCAGGTAGCCTACTAG
ACTACGACTTACACGGTAGGTCGTGAACAAGCCCCGAGTACATCTCCTTTGGAAGTACAGACCCTC
+
FFFFFFFFFFFFFFFFFFFFFF,FFFF:FFFFFFFFFF:FFFFFFFFFF::FFFFFFFF,FFFFFFFFFFFFFFFFFF
FFFFFFFFFFFFFFFFFFFFFF,FFFFFFFFFFFFFFFFFFFFFFFFFF,FF:FFFFFFFF:FFFFFFFFFFFFFFF
@A00155:342:HHGFNDSXY:1:2170:14064:29857 2:N:0:GAACCTAG+TCCGCATA
GAACTAGGAGACCCCTCCGGTCTTGTCCAACCTCTGTTTCGGCAGAGGATACCGTGCTCCACAGCTGT
AAGGCTGTGGGCCCGAGAGAAGTCGCTCTCTCTCGCCCTCCACATCCCTCTCGGCATTGAGATGACC
+
FFFFFFFFFFFFFFFFFFFFFFFFFFFF:FFFFFFFFFFFFFFFFFFFFFFFFFFFFFFFFFFFFFFFFFFFFFFFFF
FFFFFFFFFFFFFFFFFFFF:FFFFFFFFFFFFFFFFFFFFFFFFFFFFFFFFFFFFFFFFFFFFFFFFFFFFFFFFF
@A00155:342:HHGFNDSXY:1:2171:10728:7044 2:N:0:GAACCTAG+TCCGCATA
AAGGACGAAACCGTCGTTACTCTTGGAGTTGTGTAAGTTTCGTCTTAAAAAGGACTCGTCAGGTAGCC
TACTAGACTACGACTTACACGGTAGGTCGTGAACAAGCCCCGAGTACATCTCCTTTGGAAGTACGAGA
+
FFFFFFFFFFFFFFFFFFFFFFFFFFFF:FFFFFFFFFFFFFFFFFFFFFFFFFFFFFFFFFFFFFFFFFFFFFFFFF
FFFFFFFFFFFFFFFFFFFFFFFFFFFFFFFFFFFFFFFFFFFF:FFFFFFFFFFFFFFFFFFFFFFFFFFFFFFFFF,F
@A00155:342:HHGFNDSXY:1:2171:15826:18474 2:N:0:GAACCTAG+TCCGCATA
ATCTCCTTTGGAAGTACGAGACCCCTCCGGTCTTGTCCAACCTCTGTTTCGGCAGAGGATACCGTGCT
CCACAGCTGTAAGGCTGTGGGCCCGAGAGAAGTCGCTCTCTCTCGCCCTCTACATCCCTCTCGGCATT
+
:FFFFFFFF:FFFFFFFF:FFFFFFFFFFFFFFFFFFFFFFFFFFFFFFFFFFFFFFFFFFFFFFFFFFFFFFFFF
FFFFFFFFFFFFFFFFFFFFFFFFFFFFFFFFFFFFFFFFFFFFFFFFFFFFFFFFFFFFFFFFFFFFFFFFFFFFF,F
@A00155:342:HHGFNDSXY:1:2171:27190:21684 2:N:0:GAACCTAG+TCCGCATA
ACATCTCCTTTGGAAGTACGAGACCCCTCCGGTCTTGTCCAACCTCTGTTTCGGCAGAGGATACCGTG
CTCCACAGCTGTAAGGCTGTGGGCCCGAGAGAAGTCGCTCTCTCTCGCCCTCCACATCCCTCTCGGCA
+
FFFFFFFFFFFFFFFFFFFFFFFFFFFFFFFFFFFFFFFFFFFF:FFFFFFFFFFFFFFFFFFFFFFFFFFFFFFFFF
FFFFFFFFFFFFFFFFFFFFFFFFFFFFFFFFFFFFFFFFFFFFFFFFFFFFFFFFFFFFFFFFFFFFFFFFFFFFF
@A00155:342:HHGFNDSXY:1:2172:29143:27383 2:N:0:GAACCTAG+TCCGCATA
CCTTTGGAAGTACGAGACCCCTCCGGTCTTGTCCAACCTCTGTTTCGGCAGAGGATACCGTGCTCCAC
AGCTGTAAGGCTGTGGGCCCGAGAGAAGTCGCTCTCTCTCGCCCTCCACATCCCTCTCG
+
FFFFF:FFFFFFFFFFFFFFFFFFFFFFFFFFFFFFFFFFFF:FFFFF:F,FFFFFFFFFF:FF:FFFFFFFFF
:FFF::FFFFFFFFFFFF:FFFFFFFFFFFFF,F:FFFFFFFF:FFFFFFFFFFFF::FFFFFFF
@A00155:342:HHGFNDSXY:1:2172:13910:33223 2:N:0:GAACCTAG+TCCGCATA
AGCCCGGAGTACATCTCCTTTGGAAGTACGAGACCCCTCCGGTCTTGTCCAACCTCTGTTTCGGCAGA
GGATACCGTGCTCCACAGCTGTAAGGCTGTGGGCCCGAGAGAAGTCGCTCTCTCTCGCC
+
FFFFFFFFFFFFFFFFFFFFFFFFFFFFFFFFFFFFFFFFFFFFFFFFFFFFFFFFFFFFFFFFFFFFFFFFFFFFF
FFFFFFFFFFFFFFFFFFFFFFFFFFFFFFFFFFFFFFFFFFFFFFFFFFFFFFFFFFFFFFFFFFFFFFFFFFFFF
@A00155:342:HHGFNDSXY:1:2172:13566:33285 2:N:0:GAACCTAG+TCCGCATA
AGCCCGGAGTACATCTCCTTTGGAAGTACGAGACCCCTCCGGTCTTGTCCAACCTCTGTTTCGGCAGA
GGATACCGTGCTCCACAGCTGTAAGGCTGTGGGCCCGAGAGAAGTCGCTCTCTCTCGCC
+

```

[illegible]

@A00155:342:HHGFNDSXY:1:2175:19090:21214 2:N:0:GAACCTAG+TCCGCATA  
CACGGTAGGTCGTGAACAAGCCCGAGTACATCTCCTTTGGAAGTACGAGACCCCTCCGGTCTTGTCC  
AACCTCTGTTTCGGCAGAGGATACCGTGCTCCACAGCTGTAAGGCTGTGGGCCCGAGAGAAGTCGCTC  
+  
FFFF:FF:FFFFFFFFFFFFFFF,:F:FFFFFFFFFFFFFFFFFFFFFFFFFFFFFFFF:FFFFFFFFFFFF:FFFFFFF  
FFFFFFFFFFFFFFFFFFFF:FFFFFFFFFFFFFFF:F:FFFF:FFFFFFFF,F:FFFF:FFFFFFFFFFFFFFFFFFFF  
@A00155:342:HHGFNDSXY:1:2175:6433:23437 2:N:0:GAACCTAG+TCCGCATA  
TTTCGTCCTTGGAACGGAAGCTCATCAGGAAGCCTACTAGACTCCGACCGTCATGGGGGTTCAAACCCAT  
GCCCCGCCACACCGCCTTAGATCAGCTGTGTCCACTTAAGGACTCACCTCTGGCCTATGGTCATCT  
+  
:FFFFFFFFFFFFFFFFFFFFFFFFFFFFFFFFFFFFFFFFFFFFFFFFFFFFFFFFFFFFFFFFFFFFFFFFFFFFF  
FFFFFFFFFFFFFFFFFFFFFFFFFFFFFFFFFFFFFFFFFFFFFFFFFFFFFFFFFFFFFFFFFFFFFFFFFFFF:FFF  
@A00155:342:HHGFNDSXY:1:2175:22182:25097 2:N:0:GAACCTAG+TCCGCATA  
AGTACATCTCCTTTGGAAGTACGAGACCCCTCCGGTCTTGTCCAACCTCTGTTTCGGCAGAGGATACCG  
GTGCTCCACAGCTGTAAGGCTGTGGGCCCGAGAGAAGTCGCTCTCTCTCGCCCTCCACATCCCTCTCG  
+  
FFFFFFFFFFFFFFFFFFFFFFFFFFFFFFFFFFFFFFFFFFFFFFFFFFFFFFFFFFFFFFFFFFFFFFFFFFFF:FFFFFFFFF  
FFFFFFFFFFFFFFFFFFFFFFFFFFFFFFFFFFFFFFFFFFFFFFFFFFFFFFFFFFFFFFFFFFFFFFFFFFFF:FFF  
@A00155:342:HHGFNDSXY:1:2175:25482:33473 2:N:0:GAACCTAG+TCCGCATA  
GGACTCGTCAGGTAGCCTACTAGACTACGACTTACACGGTAGGTCGTGAACAAGCCCGGAGTACATCT  
CCTTTGGAAGTACGAGACCCCTCCGGTCTTGTCCAACCTCTGTTTCGGCAGAGGATACCGTGCTCCAC  
+  
FFFFFFFFFFFFFFFFFFFFFFFFFFFFFFFFFFFFFFFFFFFFFFFFFFFFFFFFFFFFFFFFFFFFFFFFFFFF:FFFFFFFFF  
FFFFFFFFFFFFFFFFFFFFFFFFFFFFFFFFFFFFFFFFFFFFFFFFFFFFFFFFFFFFFFFFFFFFFFFFFFFF:FFF  
@A00155:342:HHGFNDSXY:1:2176:16803:16501 2:N:0:GAACCTAG+TCCGCATA  
GTTGTGTAAGTTTCGTCTAAAAAGGACTCGTCAGGTAGCCTACTAGACTACGACTTACACGGTAGGT  
CGTGAACAAGCCCGGAGTACATCTCCTTTGGAAGTACGAGACCCCTCCGGTCTTGTCCAACCTCTGTT  
+  
FFFFFFFFFFFFFFFFFFFFFFFFFFFFFFFFFFFFFFFFFFFFFFFFFFFFFFFFFFFFFFFFFFFFFFFFFFFF:FFF  
FFFFFFFFF:FFFFFFFFFFFFFFFFFFFFFFFFFFFFFFFFFFFFFFFFFFFFFFFFFFFFFFFFFFFFFFFFFFFF  
@A00155:342:HHGFNDSXY:1:2176:16957:16517 2:N:0:GAACCTAG+TCCGCATA  
GTTGTGTAAGTTTCGTCTAAAAAGGACTCGTCAGGTAGCCTACTAGACTACGACTTACACGGTAGGT  
CGTGAACAAGCCCGGAGTACATCTCCTTTGGAAGTACGAGACCCCTCCGGTCTTGTCCAACCTCTGTT  
+  
FFFFFFFFFFFFFFFFFFFFFFFFFFFFFFFFFFFFFFFFFFFFFFFFFFFFFFFFFFFFFFFFFFFFFFFFFFFF:FFF  
FFFFFFFFF:FFFFFFFFFFFFFFFFFFFFFFFFFFFFFFFFFFFFFFFFFFFFFFFFFFFFFFFFFFFFFFFFFFFF  
@A00155:342:HHGFNDSXY:1:2176:20193:28761 2:N:0:GAACCTAG+TCCGCATA  
CTGGCCTATGGTCATCTCAATGCCGAGAGGGATGTGGAGGGCGAGAGAGAGCGACTTCTCTCGGGCC  
ACAGCCTTACAGCTGTGGAGCACGGTATCCTCTGCCGAAACAGAGGTTTGACAAGACCGGAGGGGTCT  
+  
FFFFFFFFFFFFFFFFFFFFFFFFFFFFFFFFFFFFFFFFFFFFFFFFFFFFFFFFFFFFFFFFFFFFFFFFFFFF:FFFFFFFFF  
FFFFFFFFFFFFFFFFFFFFFFFFFFFFFFFFFFFFFFFFFFFFFFFFFFFFFFFFFFFFFFFFFFFFFFFFFFFF:FFFFFFFFF  
@A00155:342:HHGFNDSXY:1:2177:5683:8766 2:N:0:GAACCTAG+TCCGCATA  
GAAGTACGAGACCCCTCCGGTCTTGTCCAACCTCTGTTTGGCAGAGGATACCGTGCTCCACAGCTGT  
AAGGCTGTGGGCCCGAGAGAAGTCGCTCTCTCTCGCCCTCCACATCCCTCTCGGCATTGAGATGACCA  
+  
FFFFFFFFFFFFFFFFFFFFFFFFFFFFFFFFFFFFFFFFFFFFFFFFFFFFFFFFFFFFFFFFFFFFFFFFFFFF:FFFFFFFFF  
FFFFFFFFFFFFFFFFFFFFFFFFFFFFFFFFFFFFFFFFFFFFFFFFFFFFFFFFFFFFFFFFFFFFFFFFFFFF:FFFFFFFFF  
@A00155:342:HHGFNDSXY:1:2177:25536:13150 2:N:0:GAACCTAG+TCCGCATA  
AAAGGACTCGTCAGGTAGCCTACTAGACTACGACTTACACGGTAGGTCGTGAACAAGCCCGGAGTACA  
TCTCCTTTGGAACAGGAGACCCCTCCGGTCTTGTCCAACCTCTGTTTGGCAGAGGATACCGTGCTC  
+  
FFFFFFFFFFFFFFFFFFFFFFFFFFFFFFFFFFFFFFFFFFFFFFFFFFFFFFFFFFFFFFFFFFFFFFFFFFFF:FFFFFFFFF  
FFFFFFFFFFFFFFFFFFFFFFFFFFFFFFFFFFFFFFFFFFFFFFFFFFFFFFFFFFFFFFFFFFFFFFFFFFFF:FFFFFFFFF  
@A00155:342:HHGFNDSXY:1:2177:25536:13150 2:N:0:GAACCTAG+TCCGCATA  
AAAGGACTCGTCAGGTAGCCTACTAGACTACGACTTACACGGTAGGTCGTGAACAAGCCCGGAGTACA  
TCTCCTTTGGAACAGGAGACCCCTCCGGTCTTGTCCAACCTCTGTTTGGCAGAGGATACCGTGCTC

```
@A00155:342:HHGFNDSXY:1:2177:5801:25661 2:N:0:GAACCTAG+TCCGCATA
AAGGACGAAACCGTCGTACTCTTTGAGTTGTGTAAGTTTTCTCCTAAAAAGGACTCGTCAGGTAGCC
TACTAGACTACGACTTACACGGTAGGTCGTGAACAAGCCCCGAGTACATCTCCTTTGGAAGTAGGAGA
+
FFFFFFFFFFFF:FFFFFFFFFFFFFFFFFFFFFFFFFFFFFF,F:FFFFFFFF:FFFFFFFFFFFFFFFFFFFF:FFFF
FFFFF:FFFFFFFFFFFFFFFFFFFF:FFFFFFFFFFFFFFFFFFFF:F:FFFFFFFFFFFFFFFFFFFFFFFFFFFF:FFFF
@A00155:342:HHGFNDSXY:1:2177:29704:27383 2:N:0:GAACCTAG+TCCGCATA
GTTTCGTCTCTAAAAAGGACTCGTCAGGTAGCCTACTAGACTACGACTTACACGGTAGGTCGTGAACAA
GCCCGGAGTACATCTCCTTTGGAAGTAGGAGACCCTCCGGTCTTGTC AACCTCTGTTTCGGCAGAG
+
FFFFFFFFFFFFFFFFFFFFFFFFFFFFFFFFFFFFFFFFFFFFFFFFFFFFFFFFFFFFFFFFFFFFFFFFFFFFFFFF
:FFFFFFFFFFFFF:FFFFFFFFFFFFFFFFFFFFFFFFFFFFFFFFFFFFFFFFFFFFFFFFFFFFFFFFFFFFFFFF
@A00155:342:HHGFNDSXY:1:2177:29514:27461 2:N:0:GAACCTAG+TCCGCATA
GTTTCGTCTCTAAAAAGGACTCGTCAGGTAGCCTACTAGACTACGACTTACACGGTAGGTCGTGAACAA
GCCCGGAGTACATCTCCTTTGGAAGTAGGAGACCCTCCGGTCTTGTC AACCTCTGTTTCGGCAGAG
+
FFFF:FFFFFFFFFFFFFFFFFFFFFFFFFFFFFFFFFFFFFFFFFFFFFFFFFFFFFFFFFFFFFFFFFFFFFFFF
:FFFFFFFFFFFFF:FFFFFFFFFFFFFFFFFFFFFFFFFFFFFFFFFFFFFFFFFFFFFFFFFFFFFFFFFFFFFFFF
@A00155:342:HHGFNDSXY:1:2177:29668:27602 2:N:0:GAACCTAG+TCCGCATA
GTTTCGTCTCTAAAAAGGACTCGTCAGGTAGCCTACTAGACTACGACTTACACGGTAGGTCGTGAACAA
GCCCGGAGTACATCTCCTTTGGAAGTAGGAGACCCTCCGGTCTTGTC AACCTCTGTTTCGGCAGAG
+
FFFFFFFFFFFFFFFFFFFF:FFFFFFFFFFFFFFFFFFFFFFFFFFFFFFFFFFFFFFFFFFFFFFFFFFFFFFFF
,FFFFFFFF:FFFFFFFFFFFFFFFFFFFFFFFFFFFFFFFFFFFFFFFFFFFFFFFFFFFFFFFFFFFFFFFF
@A00155:342:HHGFNDSXY:1:2178:7853:4100 2:N:0:GAACCTAG+TCCGCATA
GGTCGTGAACAAGCCCCGAGTACATCTCCTTTGGAACCAGGAGACCCTCCGGTCTTGTC AACCTCT
GTTTCGGCAGAGGATACCGTGCTCCACAGCTGTAAGGCTGTGGGCCCGAGAGAAGTCGCTCTCTCTCG
+
FFFFFFFFFFFFFFFFFFFFFFFFFFFFFFFFFFFFFFFFFFFFFFFFFFFFFFFFFFFFFFFFFFFFFFFFFFFFFFFF
FFFFFFFFFFFFFFFFFFFFFFFFFFFFFFFFFFFFFFFFFFFFFFFFFFFFFFFFFFFFFFFFFFFFFFFFFFFFF
@A00155:342:HHGFNDSXY:1:2178:24532:8750 2:N:0:GAACCTAG+TCCGCATA
GGACTCGTCAGGTAGCCTACTAGACTACGACTTACACGGTAGGTCGTGAACAAGCCCCGAGTACATCT
CCTTTGGAAGTAGGAGACCCTCCGGTCTTGTC AACCTCTGTTTCGGCAGAGGATACCGTGCTCCAC
+
FFFFFFFFFFFFFFFFFFFFFFFFFFFFFFFFFFFFFFFFFFFFFFFFFFFFFFFFFFFFFFFFFFFFFFFFFFFFFFFF
FF:FFFFFFFFFFFFFFFFFFFFFFFFFFFFFFFFFFFFFFFFFFFFFFFFFFFFFFFFFFFFFFFFFFFFFFFFFFFFF
@A00155:342:HHGFNDSXY:1:2201:15212:9862 2:N:0:GAACCTAG+TCCGCATA
TCTTGTC AACCTCTGTTTCGGCAGAGGATACCGTGCTCCACAGCTGTAAGGCTGTGGGCCCGAGAGA
AGTCGCTCTCTCTCGCCCTCCACATCCCTCTCGGCATTGAGATGACCATAGGCCAGAGGTGAGTCCTT
+
FFFFFFFFFFFFFFFFFFFFFFFFFFFFFFFFFFFFFFFFFFFFFFFFFFFFFFFFFFFFFFFFFFFFFFFFFFFFFFFF
F:FFFFFFFF:FFF,F:FFFFFFFF,F:FF
:F:FFFFFFFF:FFFFFFFFFFFFFFFFFFFFFFFFFFFF:F,FFFFFFFFFFFF,FFFFFFFFFFFFFFFF:FFFF
@A00155:342:HHGFNDSXY:1:2201:18674:36088 2:N:0:GAACCTAG+TCCGCATA
ATCTCCTTTGGAACCAGGAGACCCTCCGGTCTTGTC AACCTCTGTTTCGGCAGAGGATACCGTGCT
CCACAGCTGTAAGGCTGTGGGCCCGAGAGAAGTCGCTCTCTCTCGCCCTCCACATCCCTCTCGGCATT
+
FFFFFFFFFFFFFFF:FFFFFFFFFFFFFFFFFFFFF:F,FFFFFFFFFFFF:FFFFFFFFFFFFFFFFFFFFFFFF
FFFFFFFFFFFFFFFFFFFFFFFFFFFFFFFFFFFFFFFFFFFFFFFFFFFFFFFFFFFFFFFFFFFFFFFFFFFFF
@A00155:342:HHGFNDSXY:1:2202:24903:9048 2:N:0:GAACCTAG+TCCGCATA
GGACTCGTCAGGTAGCCTACTAGACTACGACTTACACGGTAGGTCGTGAACAAGCCCCGAGTACATCT
CCTTTGGAAGTAGGAGACCCTCCGGTCTTGTC AACCTCTGTTTCGGCAGAGGATACCGTGCTCCAC
+
FFFFFFFFFFFFFFFFFFFFFFFFFFFFFFFFFFFFFFFFFFFFFFFFFFFFFFFFFFFFFFFFFFFFFFFFFFFFFFFF
FFFFFFFFFFFFFFFFFFFFFFFFFFFFFFFFFFFFFFFFFFFFFFFFFFFFFFFFFFFFFFFFFFFFFFFFFFFFF
@A00155:342:HHGFNDSXY:1:2202:24903:9048 2:N:0:GAACCTAG+TCCGCATA
GGACTCGTCAGGTAGCCTACTAGACTACGACTTACACGGTAGGTCGTGAACAAGCCCCGAGTACATCT
CCTTTGGAAGTAGGAGACCCTCCGGTCTTGTC AACCTCTGTTTCGGCAGAGGATACCGTGCTCCAC
```

@A00155:342:HHGFNDSXY:1:2202:27010:12258 2:N:0:GAACCTAG+TCCGCATA  
ACTACGACTTACACGGTAGGTCTGTGAACAAGCCCGAGTACATCTCCTTTGGAACCAGGAGACCCCTC  
CGGTCTTGTC AACCTCTGTTTCGGCAGAGGATACCGTGCTCCACAGCTGTAAGGCTGTGGGCCCGAG  
+  
FFFFFFFFFFFFFFFFFFFFFFFFF:FFFFFFFFF:FFF,FFFFFFFFFFFFFFFFFFFFFFFFFFFFFFFFFFFF  
:FFFFF,FFFFFFFFFFFFFF:FfF,FFFFFFFF:FFFFF:FFFFFFFFFFFFFFFFFFFFFFFFFFFFFFFF  
@A00155:342:HHGFNDSXY:1:2202:26621:17628 2:N:0:GAACCTAG+TCCGCATA  
AAGGACTCACCTCTGGCCTATGGTCATCTCAATGCCGAGAGGGATGTGGAGGGCGAGAGAGAGCGACT  
TCTCTCGGGCCCACAGCCTTACAGCTGTGGAGCACGGTATCCTCTGCCGAAACAGAGGTTGGACAAGA  
+  
FFFFFFFFFFFFFFFFFFFFFFFFFFFFFFFFFFFFFFFFFFFFFFFFFFFFFFFFFFFFFFFFFFFFFFFFFFFF  
FFFFFFFFFFFFFFFFFFFFFFFFFFFFFFFFFFFFFFFFFFFFFFFFFFFFFFFFFFFFFFFFFFFFFFFFFFFF:  
@A00155:342:HHGFNDSXY:1:2202:25464:20979 2:N:0:GAACCTAG+TCCGCATA  
ACATCTCCTTTGGAAGTACAGAGACCCCTCCGGTCTTGTC AACCTCTGTTTCGGCAGAGGATACCGTG  
CTCCACAGCTGTAAGGCTGTGGGCCCGAGAGAAGTCGCTCTCTCTCGCCCTCTACATCCCTCTCGGCA  
+  
FFFFFFFFFFFFFFFFFFFFFFFFFFFFFFFFFFFFFFFFFFFFFFFFFFFFFFFFFFFFFFFFFFFFFFFFFFFF  
F:FFFF:FFFFFFFFFF:FFFFFFFFFFFFFFFFF,FFFFFFFFFFFFFFFFFFFFF:FFFFFFFFFFFFFFFF  
@A00155:342:HHGFNDSXY:1:2203:10402:3881 2:N:0:GAACCTAG+TCCGCATA  
AGTACATCTCCTTTGGAAGTACAGAGACCCCTCCGGTCTTGTC AACCTCTGTTTCGGCAGAGGATACCG  
GTGCTCCACAGCTGTAAGGCTGTGGGCCCGAGAGAAGTCACTCTCTCTCGCCCTCCACATCCCTCTCG  
+  
FFFFFFFFFFFF,:FFFFFFFFF:FFFFFFFFFFFF,:F:F,,FF:FFFFFFFFF:,F:FFFF:FFFF::FFF  
FFFFFFFFFFFFFFF,FFFFFFFFFFFFFFFFFFFFF::,FFFFFFFFFFFFFFFFFFFFFFFFFFFFF:FFFF  
@A00155:342:HHGFNDSXY:1:2203:23656:16219 2:N:0:GAACCTAG+TCCGCATA  
TTTCGTCCTAAAAAGGACTCGTCAGGTAGCCTACTAGACTACGACTTACACGGTAGGTCGTGAACAAG  
CCCGGAGTACATCTCCTTTGGAAGTACAGAGACCCCTCCGGTCTTGTC AACCTCTGTTTCG  
+  
FFFFFFFFFFFFFFFFFFFFFFFFFFFFFFFFFFFFFFFFFFFFFFFFFFFFFFFFFFFFFFFFFFFFFFFFFFFF  
FFFFFFFFFFFFFFFFFFFFFFFFFFFFFFFFFFFFFFFFFFFFFFFFFFFFFFFFFFFFFFFFFFFFFFFFFFFF  
@A00155:342:HHGFNDSXY:1:2203:32090:23594 2:N:0:GAACCTAG+TCCGCATA  
GAGACCCCTCCGGTCTTGTC AACCTCTGTTTCGGCAGAGGATACCGTGCTCCACAGCTGTAAGGCTG  
TGGGCCCGAGAGAAGTCGCTCTCTCTCGCCCTCCACATCCCTCTCGGCATTGAGATGACCATAGGCCA  
+  
FFFFFFFFFFFFFFFFFFFFFFFFFFFFFFFFFFFFFFFFFFFFFFFFFFFFFFFFFFFFFFFFFFFFFFFFFFFF  
FFFFFFFFFFFFFFFFFFFFFFFFFFFFF:FFFFFFFFFFFFFFFFFFFFF:FFFFF,FFFFFFF:FFF,FFFF:  
@A00155:342:HHGFNDSXY:1:2204:2003:1391 2:N:0:GAACCTAG+TCCGCATA  
GGACTCGTCAGGTAGCCTACTAGACTACGACTTACACGGTAGGTCGTGAACAAGCCCGAGTACATCT  
CCTTTGGAAGTACAGAGACCCCTCCGGTCTTGTC AACCTCTGTTTCGGCAGAGGATACCGTGCTCCAC  
+  
FFFFFFFFFFFFFFFFFFFFFFFFFFFFFFFFFFFFFFFFFFFFFFFFFFFFFFFFFFFFFFFFFFFFFFFFFFFF  
FFFFFFFFFFFFFFFFFFFFFFFFFFFFFFFFFFFFFFFFFFFFFFFFFFFFFFFFFFFFFFFFFFFFFFFFFFFF:FF:FFFF  
@A00155:342:HHGFNDSXY:1:2205:27624:4867 2:N:0:GAACCTAG+TCCGCATA  
GAAACCGTCGTTACTCTTTGAGTTGTGTAAGTTTCGTCCTAAAAAGGACTCGTCAGGTAGCCTACTAG  
ACTACGACTTACACGGTAGGTCTGTGAACAAGCCCGAGTACATCTCCTTTGGAAGTACAGAGACCCCTC  
+  
FFFFFFFFFFFFFFFFFFFFF:FFFFFFFFFFFFFFFFFFFFFFFFFFFFFFFFFFFFFFFFFFFFFFFFFFFF  
FFFFFFFFFFFFFFFFFFFFFFFFFFFFFFFFFFFFFFFFFFFFFFFFFFFFFFFFFFFFFFFFFFFFFFFFFFFF:  
@A00155:342:HHGFNDSXY:1:2205:17770:9157 2:N:0:GAACCTAG+TCCGCATA  
ACTTACACGGTAGGTCTGTGAACAAGCCCGAGAACATCTCCTTTGGAAGTACAGAGACCCCTCCGGTCT  
TGTCCAACCTCTGTTTCGGCAGAGGATACCGTGCTCCACAGCTGTAAGGCTGTGGGCCCGAGAGAAGT  
+  
FFFFFFFFFFFFFFFFFFFFFFFFFFFFFFFFFFFFFFFFFFFFFFFFFFFFFFFFFFFFFFFFFFFFFFFFFFFF  
FFFFFFFFFFFFFFFFFFFFFFFFFFFFFFFFFFFFFFFFFFFFFFFFFFFFFFFFFFFFFFFFFFFFFFFFFFFF:  
@A00155:342:HHGFNDSXY:1:2205:17770:9157 2:N:0:GAACCTAG+TCCGCATA  
ACTTACACGGTAGGTCTGTGAACAAGCCCGAGAACATCTCCTTTGGAAGTACAGAGACCCCTCCGGTCT  
TGTCCAACCTCTGTTTCGGCAGAGGATACCGTGCTCCACAGCTGTAAGGCTGTGGGCCCGAGAGAAGT  
+  
FFFFFFFFFFFFFFFFFFFFFFFFFFFFFFFFFFFFFFFFFFFFFFFFFFFFFFFFFFFFFFFFFFFFFFFFFFFF  
FFFFFFFFFFFFFFFFFFFFFFFFFFFFFFFFFFFFFFFFFFFFFFFFFFFFFFFFFFFFFFFFFFFFFFFFFFFF:  
@A00155:342:HHGFNDSXY:1:2205:17770:9157 2:N:0:GAACCTAG+TCCGCATA  
ACTTACACGGTAGGTCTGTGAACAAGCCCGAGAACATCTCCTTTGGAAGTACAGAGACCCCTCCGGTCT  
TGTCCAACCTCTGTTTCGGCAGAGGATACCGTGCTCCACAGCTGTAAGGCTGTGGGCCCGAGAGAAGT





@A00155:342:HHGFNDSXY:1:2207:30183:17534 2:N:0:GAACCTAG+TCCGCATA  
GGACTCGTCAGGTAGCCTACTAGACTACGACTTACACGGTAGGTCTGTGAACAAGCCCCGGAGTACATCT  
CCTTTGAACTAGGAGACCCCCTCCGGTCTTGTC AACCTCTGTTTCGGCAGAGGATACCGTGCTCCAC  
+  
FFFFFFFFFFFFFFFFFFFFFFFFFFFFFFFFFFFFFFFFFFFFFFFFFFFFFFFFFFFFF:FFFFFFFFFFFFFFFFFFFFFFFFFFFF  
FFFFFFFF,F:FFFFFFFFFFFFFFFFFFFFFFFF:FFFF:FFFFFFFFFFFFFFFFFFFFFFFFFFFFFFFFFFFFFFFFFFFF  
@A00155:342:HHGFNDSXY:1:2207:10122:18082 2:N:0:GAACCTAG+TCCGCATA  
TGTAAGGCTGTGGGCCCGAGAGAAGTCGCTCTCTCTCGCCACCACATCCCTCTCGGCATTGAGATGA  
CCATAGGCCAGAGGTGAGTCCTTAAGTGGACACAGCTGATCTAAGGCGGTGTGGCGGGGCATGGGTTT  
+  
FFFFFFFFFFFFFFFFFFFFFFFFFFFFFFFFFFFFFFFFFFFFFFFFFFFFFFFFFFFFFFF,:FFFFFFFF  
FFFFFFFFFFFFFFFFFFFFFFFFFFFFFFFFFFFFFFFFFFFFFFFFFFFFFFFFFFFFFFFF:FFFFFFFFFFFFFFFFFFFFFFFFFFFF  
@A00155:342:HHGFNDSXY:1:2207:10547:18724 2:N:0:GAACCTAG+TCCGCATA  
TGTAAGGCTGTGGGCCCGAGAGAAGTCGCTCTCTCTCGCCACCACATCCCTCTCGGCATTGAGATGA  
CCATAGGCCAGAGGTGAGTCCTTAAGTGGACACAGCTGATCTAAGGCGGTGTGGCGGGGCATGGGTTT  
+  
FFFFFFFFFFFFFFFFFFFFFFFFFFFFFFFFFFFFFFFFFFFFFFFFFFFFFFFFFFFFFFF:FFFFFFFF  
FFFFFFFFFFFFFFFFFFFFFFFFFFFFFFFFFFFFFFFFFFFFFFFFFFFFFFFFFFFFFFFF::FFFFFF  
@A00155:342:HHGFNDSXY:1:2207:10393:19241 2:N:0:GAACCTAG+TCCGCATA  
TGTAAGGCTGTGGGCCCGAGAGAAGTCGCTCTCTCTCGCCACCACATCCCTCTCGGCATTGAGATGA  
CCATAGGCCAGAGGTGAGTCCTTAAGTGGACACAGCTGATCTAAGGCGGTGTGGCGGGGCATGGGTTT  
+  
FFFFFFFFFFFFFFFFFFFFFFFFFFFFFFFFFFFFFFFFFFFFFFFFFFFFFFFFFFFFFFF:FFFFFFFF  
FFFFFFFFFFFFFFFFFFFFFFFFFFFFFFFFFFFFFFFFFFFFFFFFFFFFFFFFFFFFFFFF:FFFFFF  
@A00155:342:HHGFNDSXY:1:2207:32190:27774 2:N:0:GAACCTAG+TCCGCATA  
CCGAGTACATCTCCTTTGAACTAGGAGACCCCCTCCGGTCTTGTC AACCTCTGTTTCGGCAGAGGA  
TACCGTGCTCCACAGCTGTAAGGCTGTGGGCCCGAGAGAAGTCGCTCTCTCTCGCCCTCCACATCCCT  
+  
FFFFFFFFFFFFFFFFFFFFFFFFFFFFFFFFFFFFFFFFFFFFFFFFFFFFFFFFFFFFFFF:FF:FF  
@A00155:342:HHGFNDSXY:1:2207:2437:36902 2:N:0:GAACCTAG+TCCGCATA  
GGAGTACATCTCCTTTGAACTAGGAGACCCCCTCCGGTCTTGTC AACCTCTGTTTCGGCAGAGGATA  
CCGTGCTCCACAGCTGTAAGGCTGTGGGCCCGAGAGAAGTCGCTCTCTCTCGCCCTCCACATCCCTCT  
+  
FFFFFFFFFFFFFFFFFFFFFFFFFFFFFFFFFFFFFFFFFFFFFFFFFFFFFFFFFFFFFFF:FF:FF  
@A00155:342:HHGFNDSXY:1:2208:2808:3912 2:N:0:GAACCTAG+TCCGCATA  
GGAACGGACTCATCAGGGAGCCTACTAGACTCCGACCGTCATGGGGGTTCAAACCCATGCCCGCCAC  
ACCGCCTTAGATCAGCTGTGTCCA CT TAAGGACTCACCTCTGGCCTATGGTCATCTCAATGCCGAGAG  
+  
FFFFFFFFFFFFFFFFFFFFFFFFFFFFFFFFFFFFFFFFFFFFFFFFFFFFFFFFFFFFFFF:FFFFFFFFFFFFFFFFFFFF  
FFFFFFFFFFFFFFFFFFFFFFFFFFFFFFFFFFFFFFFFFFFFFFFFFFFFFFFFFFFFFFFF:FFFFFFFFFFFFFFFFFFFFFFFF  
@A00155:342:HHGFNDSXY:1:2208:2790:4131 2:N:0:GAACCTAG+TCCGCATA  
GGAACGGACTCATCAGGGAGCCTACTAGACTCCGACCGTCATGGGGGTTCAAACCCATGCCCGCCAC  
ACCGCCTTAGATCAGCTGTGTCCA CT TAAGGACTCACCTCTGGCCTATGGTCATCTCAATGCCGAGAG  
+  
FFFFFFFFFFFFFFFFFFFFFFFFFFFFFFFFFFFFFFFFFFFFFFFFFFFFFFFFFFFFFFF:FFFFFFFFFFFFFFFFFFFF  
FFFFFFFFFFFFFFFFFFFFFFFFFFFFFFFFFFFFFFFFFFFFFFFFFFFFFFFFFFFFFFFF:F:F:F  
@A00155:342:HHGFNDSXY:1:2209:16134:4257 2:N:0:GAACCTAG+TCCGCATA  
GAGACCCCTCCGGTCTTGTC AACCTCTGTTTCGGCAGAGGATACCGTGCTCCACAGCTGTAAGGCTG  
TGGGCCCGAGAGAAGTCGCTCTCTCTCGCCCTCCACATCCCTCTCGGCATTGAGATGACCATAGGCCG  
+

[illegible]

[illegible]

$+$  $+$ 

+

+

+

+

+

+

+

\_\_\_\_\_

@A00155:342:HHGFNDSXY:1:2217:26729:35196 2:N:0:GAACCTAG+TCCGCATA  
CAAGGACGAAACCGTCGTACTCTTCGAGTTGTGTAAGTTTCGTCCTAAAAAGGACTCGTCAGGTAGC  
CTACTAGACTACGACTTACACGGTAGGTCGTGAACAAGCCCCGGAGTACATCTCCTTTGGAACCTAGGAG  
+  
FFFFFFFFFFFFFFFFFFFFFFFFFFFFFFFFFFFFFFFFFFFFF:FFFFFFFFFFFFFFFFFFFFFFFFFFFFFFFFF  
FFFFFFFFFFFFFFFFFFFFFFFFFFFFFFFFFFFFFFFFFFFFFFFFFFFFFFFFFFFFFFFFFFFFFFFFFFFFFFF  
@A00155:342:HHGFNDSXY:1:2217:26729:35196 2:N:0:GAACCTAG+TCCGCATA  
AAGTTTCGTCCTAAAAAGGACTCGTCAGGTAGCCTACTAGACTACGACTTACACGGTAGGTCGTGAAC  
AAGCCC GGAGTACATCTCCTTTGGAACCTAGGAGACCCTCCGGTCTTGCCAACCTCTGTTTCGGCAG  
+  
FFFFFFFFFFFFFFFFFFFFFFFFFFFFFFFFFFFFFFFFFFFF, FFFFFFFF, FFFFFFFFFFFF:FF:FFFFFFFF:,  
F:F:FFF:FFFF:FFFF::FFFF:FFFFFFFF::F:FFFFFFFFFFFF::FFFF:FFFFFFFFFFFF  
@A00155:342:HHGFNDSXY:1:2218:24252:9737 2:N:0:GAACCTAG+TCCGCATA  
TAGGAGACCCTCCGGTCTTGCCAACCTCTGTTTCGGCAGAGGATACCGTGCTCCACAGCTGTAAGG  
CTGTGGGCCCGAGAGAAGTCGCTCTCTCTCGCCCTCTACATCCCTCTCGGCATTGAGATGACCATAGG  
+  
FFFFFFFFFFFFFFFFFFFFF:FFFFFFFFFFFFFFFFFFFFFFFFFFFFFFFFFFFF, FFFFFFFFFFFFFFFFFFFFFF  
FFFFFFFFFFFFFFFFFFFFF:FFFFFFFFFFFFFFFFFFFFFFFFFFFFFFFFFFFFFFFFFFFFFFFFFFFFFFFFF:  
@A00155:342:HHGFNDSXY:1:2218:4209:13291 2:N:0:GAACCTAG+TCCGCATA  
GGAGTACATCTCCTTTGGAACCTAGGAGACCCTCCGGTCTTGCCAACCTCTGTTTCGGCAGAGGATA  
CCGTGCTCCACAGCTGTAAGGCTGTGGGCCCGAGAGAAGTCGCTCTCTCTCGCCCTCCACATCCCTC  
+  
F:FFFFFFFFFFFF:FFFFFFFF:FFFF:FF:FFFFFFFFFF:F:F:F:FFFFF, FFFF:FFF,F:FF:,F  
:FFF:FF, FFFFFFFFFFFFF:, , , FFFF:FFF: , , : FF:F:FFFFFFFFF, F:, FF:FFFFF:F  
@A00155:342:HHGFNDSXY:1:2218:29559:17112 2:N:0:GAACCTAG+TCCGCATA  
ACTAGGAGACCCTCCGGTCTTGCCAACCTCTGTTTCGGCAGAGGATACCGTGCTCCACAGCTGTAA  
GGCTGTGGGCCCGAGAGAAGTCGCTCTCTCTCGTCTCCACATCCCTCTCGGCATTGAGATGAC  
+  
:FFFFFFFFFFFFFFFFFFFFFFFFFFFFFFFFFFFFFFFFFFFFFFFFFFFFFFFFFFFFFFFFFFFFFFFFFFFFF  
FFFFFFFFFFFFFFFFFFFFFFFFFFFFF:FFFFFFFFFFFFFFFFFFFFFFFFFFFFFFFFFFFFFFFFFFFFFFFFF  
@A00155:342:HHGFNDSXY:1:2219:4309:26960 2:N:0:GAACCTAG+TCCGCATA  
TAAGTGGACACAGCTGATCTAAGGCGGTGTGGCGGGGCATGGGTTTGAACCCCATGACGGTCGGAGT  
CTAGTAGGCTCCCTGATGAGTCCGTTCCAAGGACGAAACCGTCGTTACTCTTCGAGTTGTGTAAGTTT  
+  
F:FFFFFFFFFFFFFFFFFFFFFFFFFFFFFFFFFFFFFFFFFFFFFFFFFFFFFFFFFFFFFFFFFFFFFFFFFFFFF  
FFFFFFFFFFFFFFFFFFFFFFFFFFFFFFFFFFFFFFFFFFFFF:FFF:FF:FFFFFFFFFFFFFFFFF:FF:FFFF:F  
@A00155:342:HHGFNDSXY:1:2219:4689:33943 2:N:0:GAACCTAG+TCCGCATA  
GGACTCGTCAGGTAGCCTACTAGACTACGACTTACACGGTAGGTCGTGAACAAGCCCCGGAGTACATCT  
CCTTTGGAACCTAGGAGACCCTCCGGTCTTGCCAACCTCTGTTTCGGCAGAGGATACCGTGCTCCAC  
+  
FFFFFFFFFFFFFFFFFFFFFFFFFFFFFFFFFFFFFFFFFFFFFFFFFFFFFFFFFFFFFFFFFFFFFFFFFFFFF:FFFFFFFFFFFFF  
FFFFFFFFF:F:FFFFFFFFFFFFFFFFFFFFFFFFFFFFFFFFFFFFF:FFFFFFFFF, FFFFFFFFFFFFFFFFFFFFFF  
@A00155:342:HHGFNDSXY:1:2220:1542:26271 2:N:0:GAACCTAG+TCCGCATA  
ACACGGTAGGTCGTGAACAAGCCCCGGAGTACATCTCCTTTGGAACCTAGGAGACCCTCCGGTCTTGTC  
CAACCTCTGTTTCGGCAGAGGATACCGTGCTCCACAGCTGTAAGGCTGTGGGCCCGAGAGAAGTCGCT  
+  
FFFFFFFFFFFFFFFFFFFFFFFFFFFFFFFFFFFFFFFFFFFFFFFFFFFFFFFFFFFFFFFFFFFFFFFFFFFFF, FFFFFFFFFFFFFFFFFFFFFFFFFFFFFF  
FFFFFFFFFFFFFFFFFFFFFFFFFFFFFFFFFFFFF:FFFFFFFFF, FFFFFFFFFFFF:FFFFFFFFFFFFFFFFFFFFF  
@A00155:342:HHGFNDSXY:1:2220:16532:36636 2:N:0:GAACCTAG+TCCGCATA  
GGAGTACATCTCCTTTGGAACCAGGAGACCCTCCGGTCTTGCCAACCTCTGTTTCGGCAGAGGATA  
CCGTGCTCCACAGCTGTAAGGCTGTGGGCCCGAGAGAAGTCGCTCTCTCTCGCCCTCCACATCCCTCT

@A00155:342:HHGFNDSXY:1:2221:12852:3082 2:N:0:GAACCTAG+TCCGCATA  
CAGGTAGCCTACTAGACTACGACTTACACGGTAGGTCGTGAACAAGCCCGGAGTACATCTCCTTTGGA  
ACCAGGAGACCCCTCCGGTCTTGTCCAACCTCTGTTTCGGCAGAGGATACCGTGCTCCACAGCTGTAA  
+  
FFFFFF:F:FFFFFFFFFFFFFF:FFFFFFFFFFFFFF:FFFFFFFF:FFFFFFFF  
FFFFFFFF,FFFFFFFFFFFFFF,FF,FF:FFFFFFFFFFFFFF,FFFFFFFF:FFF  
@A00155:342:HHGFNDSXY:1:2221:30011:15045 2:N:0:GAACCTAG+TCCGCATA  
AGTTTCGTCCTAAAAAGGACTCGTCAGGTAGCCTACTAGACTACGACTTACACGGTAGGTCGTGAACA  
AGCCCGGAGTACATCTCCTTTGGAAGTACGAGACCCCTCCGGTCTTGTCCAACCTCTGTTTCGGCAGA  
+  
FFFFFFFFFFFFFFFF:FFFFFFFFFFFFFFFF:FFF:FFFFFF  
F:FFFFFFFF:FFFF:FFFFFFFFFFFFFFFFFFFFFFFFFFFFFFFF  
@A00155:342:HHGFNDSXY:1:2221:28962:16016 2:N:0:GAACCTAG+TCCGCATA  
AGTTTCGTCCTAAAAAGGACTCGTCAGGTAGCCTACTAGACTACGACTTACACGGTAGGTCGTGAACA  
AGCCCGGAGTACATCTCCTTTGGAAGTACGAGACCCCTCCGGTCTTGTCCAACCTCTGTTTCGGCAGA  
+  
FFFFFFFFFFFFFFFF:FFFFFFFFFFFFFFFF:FFFFFF  
FFFFFFFFFFFFFFFF:FFFF:FFFFFFFFFFFFFFFFFFFFFFFF  
@A00155:342:HHGFNDSXY:1:2222:10791:5838 2:N:0:GAACCTAG+TCCGCATA  
AAAAGGACTCGTCAGGTAGCCTACTAGACTACGACTTACACGGTAGGTCGTGAACAAGCCCGGAGTAC  
ATCTCCTTTGGAAGTACGAGACCCCTCCGGTCTTGTCCAACCTCTGTTTCGGCAGAGGATACCGTGCT  
+  
::FF,FFFFFFFF:FFFFF:FFFFF,FFFFFFFF:FFFF:FF:F:FF:FFFFFFFF  
FFFFFF,FF:FFFFF:FFFFF:FFFFF:,FFFFFF:,F:F:FF,FFFFFFFF  
@A00155:342:HHGFNDSXY:1:2223:31711:11256 2:N:0:GAACCTAG+TCCGCATA  
TAGGTCGTGAACAAGCCCGGAGTACATCTCCTTTGGAAGTACGAGACCCCTCCGGTCTTGTCCAACCT  
CTGTTTCGGCAGAGGATACCGTGCTCCACAGCTGTAAGGCTGTGGGCCCGAGAGAAGTCGCTCTCTCT  
+  
FFFFFFFFFFFFFFFF:FFFFF:FF:FFFFFFFF:FFFFFF  
FFFFFF:FFFFF:FFFFFFFFFFFFFFFFFFFFFFFFFFFFFFFF:FFFF  
@A00155:342:HHGFNDSXY:1:2223:32081:11835 2:N:0:GAACCTAG+TCCGCATA  
TAGGTCGTGAACAAGCCCGGAGTACATCTCCTTTGGAAGTACGAGACCCCTCCGGTCTTGTCCAACCT  
CTGTTTCGGCAGAGGATACCGTGCTCCACAGCTGTAAGGCTGTGGGCCCGAGAGAAGTCGCTCTCTCT  
+  
FFFFFFFFFFFFFFFF:FFFFFFFF:FFFFFFFF,FFFFFFFF  
FFFFFFFFFFFFFFFF:FFFF:FFFFFFFF,FFFFFFFF  
@A00155:342:HHGFNDSXY:1:2224:20772:11099 2:N:0:GAACCTAG+TCCGCATA  
AAAAGGACTCGTCAGGTAGCCTACTAGACTACGACTTACACGGTAGGTCGTGAACAAGCCCGGAGTAC  
ATCTCCTTTGGAAGTACGAGACCCCTCCGGTCTTGTCCAACCTCTGTTTCGGCAGAGGATACCGTGCT  
+  
FFFFFFFFFFFFFFFF:FFFFF:FFFFFFFF  
FFFF:F,FFFFFFFFFFFFFFFF,FFFFFFFF:FFFFF:  
@A00155:342:HHGFNDSXY:1:2224:21775:11428 2:N:0:GAACCTAG+TCCGCATA  
AAAAGGACTCGTCAGGTAGCCTACTAGACTACGACTTACACGGTAGGTCGTGAACAAGCCCGGAGTAC  
ATCTCCTTTGGAAGTACGAGACCCCTCCGGTCTTGTCCAACCTCTGTTTCGGCAGAGGATACCGTGCT  
+  
FFFFFFFFFFFFFFFF:FFFFFFFF:FFFFFFFF:FFFFF:F  
FFFFFFFF,FFFFFF:FFFFFFFF:FFFFFFFF:FFFF:F  
@A00155:342:HHGFNDSXY:1:2224:12301:17848 2:N:0:GAACCTAG+TCCGCATA  
ACATCTCCTTTGGAAGTACGAGACCCCTCCGGTCTTGTCCAACCTCTGTTTCGGCAGAGGATACCGTG  
CTCCACAGCTGTAAGGCTGTGGGCCCGAGAGAAGTCGCTCTCTCTCGCCCTCCACATCCCTCTCGGCA  
+  
FFFFFFFF:FFFFFFFF:FFFFFFFF:FFFFF  
FFFFFFFFFFFFFFFF:FFFFFFFF:FFFFFFFF

+  
@A00155:342:HHGFNDSXY:1:2224:19452:30420 2:N:0:GAACCTAG+TCCGCATA  
GTGAACAAGCCCCGAGTACATCTCCTTTGGAAGTAGGAGACCCTCCGGTCTTGTC AACCTCTGTTT  
CGGCAGAGGATACCGTGCTCCACAGCTGTAAGGCTGTGGGCCCGAGAGAAGTCGCTCTCTCTCGCCCT  
+  
FFFFFFFFFFFFFFFFFFFFFFFFFFFFFFFFFFFFFFFFFFFFFFFFFFFFFFFFFFFFFFFFFFFFF:FFFFFFFFFFFFFFFFFFFF  
FFFFFFFFFFFFFFFFFFFFFFFFFFFFFFFFFFFFFFFFFFFFFFFFFFFFFFFFFFFFFFFFFFFFFFFFF,FFFFFFFFFFFFFFFFFFFFFFFFFFFFFFFFFFFFFFFFFFFFF  
@A00155:342:HHGFNDSXY:1:2225:27588:26506 2:N:0:GAACCTAG+TCCGCATA  
AAAAGGACTCGTCAGGTAGCCTACTAGACTACGACTTACACGGTAGGTCGTGAACAAGCCCCGAGTAC  
ATCTCCTTTGGAAGTAGGAGACCCTCCGGTCTTGTC AACCTCTGTTTCGGCAGAGGATACCGTGCT  
+  
FFFFFFFFFFFFFFFFFFFFFFFFFFFFFFFFFFFFFFFFFFFFFFFFFFFFFFFFFFFFFFFFFFFFF:FFFFFFFFFFFFF  
:FFFFFFFFFFF:F,FFFFFFFFFF:F:FFFFFFFFFFFFFFFFFFFFFFFFFFFFFFFFFFFFFFFFFFFFFFFFFFFFF  
@A00155:342:HHGFNDSXY:1:2226:30689:17033 2:N:0:GAACCTAG+TCCGCATA  
ACTAGACTCCGACCGTCATGGGGGTTCAAACCCATGCCCGCCACACCGCCTTAGATCAGCTGTGTCC  
ACTTAAGGACTCACCTCTGCCTATGGTCATCTCAATGCCGAGAGGGATGTGGAGGGCGAGAGAGAGC  
+  
FFFFFFFFFFFFFFFFFFFFFFFFFFFFFFFFFFFFFFFFFFFFFFFFFFFFFFFFFFFFFFFFFFFFF:FFFFFFFFFFFFF  
FFFFF:FFFFFFFFF:FFFFFFFFFFFFFFFFFFFFFFFFFFFFFFFFFFFFFFFFFFFFFFFFFFFFF:FFFFF:FFFFFFFFFFFFF  
@A00155:342:HHGFNDSXY:1:2226:1181:21324 2:N:0:GAACCTAG+TCCGCATA  
AACTAGGAGACCCTCCGGTCTTGTC AACCTCTGTTTCGGCAGAGGATACCGTGCTCCACAGCTGTA  
AGGCTGTGGGCCCGAGAGAAGTCGCTCTCTCTCGCCCTCCACATCCCTCTCGGCATTGAGATGAC  
+  
:FFF:FFFFFFFFFFFFFFFFF,FFF:FFFFFFFFFFFFFFFFFFFFFFFFF,FFFFFFFFFFFFFFFFFFFFFFFFFFFFF:  
FFF,FFFFFFFFFFFF:FFFFFFFFF:FFF::FFFFFFFFFFFFFFFFF:FFFFFFFFFFFFFFFFFFFF,F:FF::  
@A00155:342:HHGFNDSXY:1:2226:19967:23453 2:N:0:GAACCTAG+TCCGCATA  
ACGACTTACACGGTAGGTCGTGAACAAGCCCCGAGTACATCTCCTTTGGAAGTAGGAGACCCTCCGG  
TCTTGTC AACCTCAGTTTCGGCAGAGGATACCGTGCTCCACAGCTGTAAGGCTGTGGGCCCGAGAGA  
+  
FF:FF:FFFFFFFFFFFFFFFFFFFFFFFFFFFFFFFFFFFFFFFFFFFFFFFFFFFFFFFFFFFFF,FFFFFFFFFFFFFFFFFFFFF  
F:FFFFFF:FFFFFFF:FFF,F,FFFF:FFFFFFFFF:FFFFFFFFFFFFF,FFFFFFFFFFFFFFFFFFFFFFFFFFFFF  
@A00155:342:HHGFNDSXY:1:2226:12255:25160 2:N:0:GAACCTAG+TCCGCATA  
CACGGTAGGTCGTGAACAAGCCCCGAGTACATCTCCTTTGGAAGTAGGAGACCCTCCGGTCTTGTC  
AACCTCTGTTTCGGCAGAGGATACCGTGCTCCACAGCTGTAAGGCTGTGGGCCCGAGAGAAGTCGCTC  
+  
FFFFFFFFFFFFFFFFFFFFFFFFFFFFFFFFFFFFFFFFFFFFFFFFFFFFFFFFFFFFFFFFFFFFF:FFFFFFFFFFFFFFFFFFFFFFFFFFFFF  
FFFFFFFFFFFFFFFFFFFFFFFFFFFFFFFFFFFFFFFFFFFFFFFFFFFFFFFFFFFFFFFFFFFFFFFFF  
@A00155:342:HHGFNDSXY:1:2226:13657:28620 2:N:0:GAACCTAG+TCCGCATA  
GAAACCGTCGTTACTCTTCGAGTTGTGTAAGTTTCGTCCTAAAAAGGACTCGTCAGGTAGCCTACTAG  
ACTACGACTTACACGGTAGGTCGTGAACAAGTCCGAGTACATCTCCTTTGGAAGTAGGAGACCCTC  
+  
FFFFFFFFFFFFFFFFFFFFFFFFFFFFFFFFFFFFFFFFFFFFFFFFFFFFFFFFFFFFFFFFFFFFF:FFFFFFFFFFFFFFFFFFFFFFFFFFFFF  
FFFFFFFFFFFFFFFFFFFFFFFFFFFFFFFFFFFFFFFFFFFFFFFFFFFFFFFFFFFFFFFFFFFFFFFFF  
@A00155:342:HHGFNDSXY:1:2227:9019:13291 2:N:0:GAACCTAG+TCCGCATA  
GGACTCGTCAGGTAGCCTACTAGACTACGACTTACACGGTAGGTCGTGAACAAGCCCCGAGTACATCT  
CCTTTGGAAGTAGGAGACCCTCCGGTCTTGTC AACCTCTGTTTCGGCAGAGGATACCGTGCTCCAC  
+  
,:FFFF:FFFFFFF,FFFF:FFFFFFFFFFFFFFFFFFFFFFFFF:FFFFFFFFFFFFFFFFF,:FFFFFFFFFFFFFFFFF  
FFFFFFFFFFFF:FFF:FF:FFFFFFFFFFFFF:,F,FFFFFFFFFFFFFFFFFFFF,FFFFFFFFFF:FFFFFF:FF  
@A00155:342:HHGFNDSXY:1:2227:22580:15295 2:N:0:GAACCTAG+TCCGCATA  
GAGTCCGTTCCAAGGACGAAACCGTCGTTACTCTTTGAGTTGTGTAAGTTTCGTCCTAAAAAGGACTC  
GTCAGGTAGCCTACTAGACTACGACTTACACGGTAGGTCGTGAACAAGCCCCGAGTACATCTCCTTTG  
+  
FFFFFFFFFFFFFFFFFFFFFFFFFFFFFFFFFFFFFFFFFFFFFFFFFFFFFFFFFFFFFFFFFFFFF,FFFFFFFFFFFFFFFFFFFFF:FFFFFFFFFFFFF:FFFFFFF  
F:FFFFFFFFFFFF:FFFFFFFFFFFFFFFFF:FFFFF:FFFFFFFFFFFFFFFFFFFFFFFFFFFFFFFFFFFFF:FFFF:FF

[illegible]



@A00155:342:HHGFNDSXY:1:2229:25889:8750 2:N:0:GAACCTAG+TCCGCATA  
 TGAACAAGCCCGGAGTACATCTCCTTTGGAACCAGGAGACCCCTCCGGTCTTGTCCAACCTCTGTTTC  
 GGCAGAGGATACCGTGCTCCACAGCTGTAAGGCTGTGGGCCCGAGAGAAGTCGCTCTCTCTCGCCCTC  
 +  
 FFFFFFFFFFFFFFFFFFFFFFFF:FFFFFF:FFFFFFFFFFFFFFFFFFFFFFFFFFFFFFFFFFFFFFFFFFFFFFFF  
 FFFFFFFFFFFFFFFFFFFFFFFFFFFFFFFFFFFFFFFFFFFFFFFFFFFFFFFFFFFFFFFFFFFFFFFFFF:FFFFFF  
 @A00155:342:HHGFNDSXY:1:2229:1515:16110 2:N:0:GAACCTAG+TCCGCATA  
 AAAAGGACTCGTCAGGTAGCCTACTAGACTACGACTTACACGGTAGGTCGTGAACAAGCCCGGAGTAC  
 ATCTCCTTTGGAAGTAGGAGACCCCTACGGTCTTGTCCAACCTCTGTTTCGGCAGAGGATACCGTGCT  
 +  
 :FF,FFFFFFFF::FFFFFFFFFFFFFFFFFFFFFFFF,FFFFF,FFFFFF:FFFF,FFFF,FF,FF:FFFF  
 FFFF:FFFFFF:::FFFF,F::F:FF,:FFF:FFFFFFFF,FFF::FF:F:FF,,FF::FFF,:FFFFF  
 @A00155:342:HHGFNDSXY:1:2229:11198:21355 2:N:0:GAACCTAG+TCCGCATA  
 CTACGACTTACACGGTAGGTCGTGAACAAGCCCGGAGTACATTTCTTTTGAAGTAGGAGACCCCTCC  
 GGTCTTGTCCAACCTCTGTTTCGGCAGAGGATACCGTGCTCCACAGCTGTAAGGCTGTGGGCCCGAGA  
 +  
 FFFFFFFF:FFFFFFFFFFFFFFFFFFFFFF:FFFFFFFFFFFFFFFFFFFFFFFFFFFFFFFFFFFFFFFFFFFF  
 FFFFFFFFFFFFFFFFFFFFFFFFFFFFFFFFFFFFFFFFFFFFFFFFFFFFFFFFFFFFFFFFFFFFFFFFFF  
 @A00155:342:HHGFNDSXY:1:2229:7636:34507 2:N:0:GAACCTAG+TCCGCATA  
 GTGAACAAGCCCGGAGTACATCTCCTTTGGAAGTAGGAGACCCCTCCGGTCTTGTCCAACCTCTGTTT  
 CGGCAGAGGATACCGTGCTCCACAGCTGTAAGGCTGTGGGCCCGAGAGAAGTCGCTCTCTCTCGCC  
 +  
 FFFFFFFFFFFFFFFFFFFFFFFFFFFFFFFFFFFFFFFFFFFFFFFFFFFFFFFFFFFFFFFFFFFFFFFFFF  
 FFFFFFFFFFFFFFFFFFFFFFFFFFFFFFFFFFFFFFFFFFFFFFFFFFFFFFFFFFFFFFFFFFFFFFFFFF  
 @A00155:342:HHGFNDSXY:1:2229:5394:37043 2:N:0:GAACCTAG+TCCGCATA  
 GTGAACAAGCCCGGAGTACATCTCCTTTGGAAGTAGGAGACCCCTCCGGTCTTGTCCAACCTCTGTTT  
 CGGCAGAGGATACCGTGCTCCACAGCTGTAAGGCTGTGGGCCCGAGAGAAGTCGCTCTCTCTCGCC  
 +  
 FFFFFFFFFFFFFFFF:FFFFFFFFFFFF:FFFFFFFFFFFFFFFFFFFFFFFFFFFFFFFFFFFFFFFFFFFF  
 :FFFFFFFFFFFF:FFFFFFFFFFFFFFFFFFFFFFFFFFFFFFFFFFFFFFFFFFFFFFFFFFFFFFFFFFFF  
 @A00155:342:HHGFNDSXY:1:2230:27823:23406 2:N:0:GAACCTAG+TCCGCATA  
 TCTTTGAGTTGTGTAAGTTTCGTCTCTAAAAAGGACTCGTCAGGTAGCCTACTAGACTACGACTTACAC  
 GGTAGGTCGTGAACAAGCCCGGAGTACATCTCCTTTGGAAGTAGGAGACCCCTCCGGTCTTGTCCAAC  
 +  
 :F:,FFFFFFFFFFFFFFFFFFFFFFFF,FFFFFFFFFFFFFFFFFFFF::FFF:FFF:F:FFFFFF,FFFF  
 FFF,FFFF::FFFFFFFFFF:FF::FFFF:FF:FFFFFFFF::FF:FFFFFFFFFFFF::FFFFFFFFFFFF  
 @A00155:342:HHGFNDSXY:1:2230:14733:33959 2:N:0:GAACCTAG+TCCGCATA  
 CTACTAGACTACGACTTACACGGTAGGTCGTGAACAAGTCCGGAGTACATCTCCTTTGGAAGTAGGAG  
 ACCCTCCGGTCTTGTCCAACCTCTGTTTCGGCAGAGGATACCGTGCTCCACAGCTGTAAGGCTGTGG  
 +  
 FFFFFFFFFFFFFFFFFFFFFFFFFFFFFFFFFFFFFFFFFFFFFFFFFFFFFFFFFFFFFFFFFFFFFFFFFF  
 FFFFFFFFFFFFFFFFFFFFFFFFFFFFFFFFFFFFFFFFFFFFFFFFFFFFFFFFFFFFFFFFFFFFFFFFFF,FFFFFFFF  
 @A00155:342:HHGFNDSXY:1:2231:8892:2550 2:N:0:GAACCTAG+TCCGCATA  
 TACGACTTACACGGTAGGTCGTGAACAAGCCCGGAGTACATCTCCTTTGGAAGTAGGAGACCCCTCCG  
 GTCTTGTCCAACCTCTGTTTCGGCAGAGGATACCGTGCTCCACAGCTGTAAGGCTGTGGGCCCG  
 +  
 F:FFFFFFFFFFFFFFFFFFFFFFFFFFFFFFFFFFFFFFFFFFFFFFFFFFFFFFFFFFFFFFFFFFFF:FFFFFFF:FFFFFFFFFFFFF:FFF  
 FFFFFFFFFFFFFFFFFFFFFFFFFFFFFF:FFF:FFFFFFFFFFFFFFFFFFFFFFFFFFFFFFFFFFFFFFFF  
 @A00155:342:HHGFNDSXY:1:2231:9218:7529 2:N:0:GAACCTAG+TCCGCATA  
 TAGACTACGACTTACACGGTAGGTCGTGAACAAGCCCGGAGTACATCTCCTTTGGAAGTAGGAGACCC  
 CTCCGGTCTTGTCCAACCTCTGTTTCGGCAGAGGATACCGTGCTCCACAGCTGTAAGGCTGTGGGCCCG  
 +  
 FFFFFFFFFFFFFFFFFFFFFFFFFFFFFFFFFFFFFFFFFFFFFFFFFFFFFFFFFFFFFFFFFFFFFFFFFF  
 FFFFFFFFFFFFFFFFFFFFFF:FFFFFFFFFFFFFFFFFFFFFFFFFFFFFFFFFFFFFFFFFFFFFFFFFFFF

@A00155:342:HHGFNDSXY:1:2231:20220:16720 2:N:0:GAACCTAG+TCCGCATA  
TTTCGTCCTAAAAAGGACTCGTCAGGTAGCCTACTAGACTACGACTTACACGGTAGGTCGTGAACAAG  
CCCGGAGTACATCTCCTTTGGAACCAGGAGACCCCTCCGGTCTTGTCCAACCTCTGTTTCGGCAGAGG  
+  
FFFFFFFFFFFFFFFFFFFFFFFFFFFFFFFFFFFFFFFFFFFFFFFFFFFFFFFFFFFFFFFFFFFFFFFFFFFFFFFF  
FFFFFFFFFFFFFFFFFFFFFFFFFFFFFFFFFFFFFFFFFFFFFFFFFFFFFFFFFFFFFFFFFFFFFFFFFFFFFFFF  
@A00155:342:HHGFNDSXY:1:2231:16034:24126 2:N:0:GAACCTAG+TCCGCATA  
GTGAACAAGCCCGGAGTACATCTCCTTTGGAAGTGGAGACCCCTCCGGTCTTGTCCAACCTCTGTTT  
CGGCAGAGGATACCGTGCTCCACAGCTGTAAGGCTGTGGGCCCGAGAGAAGTCGCTCTCTCTCGCCCT  
+  
FFFFFFFFFFFFFFFFFFFFFFFFFFFFFFFFFFFFFFFFFFFFFFFFFFFFFFFFFFFFFFFFFFFFFFFFFFFFFFFF  
FFFFFFFFFFFFFFFFFFFFFFFFFFFFFFFFFFFFFFFFFFFFFFFFFFFFFFFFFFFFFFFFFFFFFFFFFFFFFFFF  
@A00155:342:HHGFNDSXY:1:2232:32353:18944 2:N:0:GAACCTAG+TCCGCATA  
GTAGCCTACTAGACTACGACTTACACGGTAGGTCGTGAACAAGCCCGGAGTACATCTCCTTTGGAAGT  
AGGAGACCCCTCCGGTCTTGTCCAACCTCTGTTTCGGCAGAGGATACCGTGCTCCACAGCTGTAAGGC  
+  
FF:FFFFFFFFFFFFFFFFFFFFFFFFFFFFFFFFFFFFFFFFFFFFFFFFFFFFFFFFFFFFFFFFFFFFFFFFFFFF  
FF,FFFFFFFFFFFFFFFFFFFFFFFFFFFFFFFFFFFFFFFFFFFFFFFFFFFFFFFFFFFFFFFFFFFFFFFFFFFF  
FF,FFFFFFFFFFFFFFFFFFFFFFFFFFFFFFFFFFFFFFFFFFFFFFFFFFFFFFFFFFFFFFFFFFFFFFFFFFFF  
@A00155:342:HHGFNDSXY:1:2232:13928:21292 2:N:0:GAACCTAG+TCCGCATA  
CCTACTAGACTACGACTTACACGGTAGGTCGTGAACAAGCCCGGAGTACATCTCCTTTGGAAGTGGT  
GACCCCTCCGGTCTTGTCCAACCTCTGTTTCGGCAGAGGATACCGTGCTCCACAGCTGTAAGGCTGTG  
+  
FFFFFFFFFFFFFFFFFFFFFFFFFFFFFFFFFFFFFFFFFFFFFFFFFFFFFFFFFFFFFFFFFFFFFFFFFFFFFFFF  
FFFFFFFFFFFFFFFFFFFFFFFFFFFFFFFFFFFFFFFFFFFFFFFFFFFFFFFFFFFFFFFFFFFFFFFFFFFFFFFF  
@A00155:342:HHGFNDSXY:1:2232:18511:22654 2:N:0:GAACCTAG+TCCGCATA  
TCGTCCTAAAAAGGACTCGTCAGGTAGCCTACTAGACTACGACTTACACGGTAGGTCGTGAACAAGCC  
CGGAGTACATCTCCTTTGGAAGTGGAGACCCCTCCGGTCTTGTCCAACCTCTGTTTCGGCAGAGGAT  
+  
FFFFFFFF:FFFFFFFFFFFFFFFFFFFFFFFFFFFFFFFFFFFFFFFFFFFFFFFFFFFFFFFFFFFFFFFFFFFF  
FFFFFFFFFFFFFFFFFFFFFFFFFFFFFFFFFFFFFFFFFFFFFFFFFFFFFFFFFFFFFFFFFFFFFFFFFFFF  
@A00155:342:HHGFNDSXY:1:2232:24288:31782 2:N:0:GAACCTAG+TCCGCATA  
GGTCGTGAACAAGCCCGGAGTACATCTCCTTTGGAAGTGGAGACCCCTCCGGTCTTGTCCAACCTCT  
GTTTCGGCAGAGGATACCGTGCTCCACAGCTGTAAGGCTGTGGGCCCGAGAGAAGTCGCTCTCTCTCG  
+  
FFFFFFFFFFFFFFFFFFFFFFFFFFFFFFFFFFFFFFFFFFFFFFFFFFFFFFFFFFFFFFFFFFFFFFFFFFFF  
FFFFFFFFFFFFFFFFFFFFFFFFFFFFFFFFFFFFFFFFFFFFFFFFFFFFFFFFFFFFFFFFFFFFFFFFFFFF  
@A00155:342:HHGFNDSXY:1:2232:19461:33786 2:N:0:GAACCTAG+TCCGCATA  
TCGTGAACAAGCCCGGAGTACATCTCCTTTGGAAGTGGAGACCCCTCCGGTCTTGTCCAACCTCTGT  
TTCGGCAGAGGATACCGTGCTCCACAGCTGTAAGGCTGTGGGCCCGAGAGAAGTCGCTCTCTCTCGCC  
+  
FFFFFFFFFFFFFFFFFFFFFFFFFFFFFFFFFFFFFFFFFFFFFFFFFFFFFFFFFFFFFFFFFFFFFFFFFFFF  
FFFFFFFFFFFFFFFFFFFFFFFFFFFFFFFFFFFFFFFFFFFFFFFFFFFFFFFFFFFFFFFFFFFFFFFFFFFF  
@A00155:342:HHGFNDSXY:1:2232:31313:36808 2:N:0:GAACCTAG+TCCGCATA  
CCTACTAGACTACGACTTACACGGTAGGTCGTGAACAAGCCCGGAGTACATCTCCTTTGGAACCAGGA  
GACCCCTCCGGTCTTGTCCAACCTCTGTTTCGGCAGAGGATACCGTGCTCCACAGCTGTAAGGCTGTG  
+  
FFFFFFFFFFFFFFFFFFFFFFFFFFFFFFFFFFFFFFFFFFFFFFFFFFFFFFFFFFFFFFFFFFFFFFFFFFFF  
FFFFFFFFFFFFFFFFFFFFFFFFFFFFFFFFFFFFFFFFFFFFFFFFFFFFFFFFFFFFFFFFFFFFFFFFFFFF  
@A00155:342:HHGFNDSXY:1:2233:6027:23578 2:N:0:GAACCTAG+TCCGCATA  
GAAACCGTCGTTACTCTTTGAGTTGTGTAAGTTTCGTCCTAAAAAGGACTCGTCAGGTAGCCTACTAG  
ACTACGACTTACACGGTAGGTCGTGAACAAGCCCGGAGTACATCTCCTTTGGAAGTGGAGACCCCTC  
+  
FFFFFFFFFFFFFFFFFFFFFFFFFFFFFFFFFFFFFFFFFFFFFFFFFFFFFFFFFFFFFFFFFFFFFFFFFFFF  
FFFFFFFFFFFFFFFFFFFFFFFFFFFFFFFFFFFFFFFFFFFFFFFFFFFFFFFFFFFFFFFFFFFFFFFFFFFF  
@A00155:342:HHGFNDSXY:1:2233:6027:23578 2:N:0:GAACCTAG+TCCGCATA  
GAAACCGTCGTTACTCTTTGAGTTGTGTAAGTTTCGTCCTAAAAAGGACTCGTCAGGTAGCCTACTAG  
ACTACGACTTACACGGTAGGTCGTGAACAAGCCCGGAGTACATCTCCTTTGGAAGTGGAGACCCCTC  
+  
FFFFFFFFFFFFFFFFFFFFFFFFFFFFFFFFFFFFFFFFFFFFFFFFFFFFFFFFFFFFFFFFFFFFFFFFFFFF  
FFFFFFFFFFFFFFFFFFFFFFFFFFFFFFFFFFFFFFFFFFFFFFFFFFFFFFFFFFFFFFFFFFFFFFFFFFFF  
@A00155:342:HHGFNDSXY:1:2233:6027:23578 2:N:0:GAACCTAG+TCCGCATA  
GAAACCGTCGTTACTCTTTGAGTTGTGTAAGTTTCGTCCTAAAAAGGACTCGTCAGGTAGCCTACTAG  
ACTACGACTTACACGGTAGGTCGTGAACAAGCCCGGAGTACATCTCCTTTGGAAGTGGAGACCCCTC

[illegible]

+

+

+

+

+

+

+

+

+

[illegible]

@A00155:342:HHGFNDSXY:1:2241:24939:16908 2:N:0:GAACCTAG+TCCGCATA  
 GGACTCGTCAGGTAGCCTACTAGACTACGACTTACACGGTAGGTCGTGAACAAGCCCGGAGTACATCT  
 CCTTTGGAAGTAGGAGACCCCTCCGGTCTTGTCCAACCTCTGTTTCGGCAGAGGATACCGTGCTCCAC  
 +  
 FFFFFFFFFFFFFFFFFFFFFF:FFFF:FFFFFFFFFFFFFFFFFFFFFFFFFFFFFFFFFFFFFFFF,FFFFFFFFFFFFFFFF  
 FFFFF,FFFFFFFFFFFFFFFFFFFFF:F:FFFFFFFFFFFFFFFFFFFFFFFFFFFFFFFFFFFFFFFFFFFFFFFF  
 @A00155:342:HHGFNDSXY:1:2241:31738:25269 2:N:0:GAACCTAG+TCCGCATA  
 TAGGAGACCCCTCCGGTCTTGTCCAACCTCTGTTTCGGCAGAGGATACCGTGCTCCACAGCTGTAAGG  
 CTGTGGGCCCGAGAGAAGTCGCTCTCTCTCGCCCTCCACATCCCTCTCGGCATTGAGATGACCATAG  
 +  
 FFFFFFFFFFFFFFFFFFFFFFFFFFFFFFFFFFFFFFFFFFFFFFFFFFFFFFFFFFFFFFFFFFFFFFFFFF:FF  
 FFFFFFFFFFFFFFFFFFFFF,FFFFF:FFFFFFFFFFFFFFFFFFFF:FFFFFFFFFFFFFFFFFFFFFFFFFFFF,FFF  
 @A00155:342:HHGFNDSXY:1:2241:29649:32800 2:N:0:GAACCTAG+TCCGCATA  
 ACTCTTCGAGTTGTGTAAGTTTCGTCTCTAAAAAGGACTCGTCAGGTAGCCTACTAGACTACGACTTAC  
 ACGGTAGGTCGTGAACAAGCCCGGAGTACATCTCCTTTGGAAGTAGGAGACCCCTCCGGTCTTGTCCA  
 +  
 FFFF,FFFFFFFFFFFF,FFFFFFFFFFFF:FFFFFFFFFFFFFFFFFFFFFFFFFFFFFFFF,FFFFFFFFFFFFFFFF  
 FFFFFFFFFFFFFFFFFF:FFFFFFFFFFFF:FFFFFFFFF:F:FFFFFFFFFFFF:FFFFFFFFFFFF:FFFF:F  
 @A00155:342:HHGFNDSXY:1:2242:6470:1078 2:N:0:GAACCTAG+TCCGCATA  
 ACTCTTCGAGTTGTGTAAGTTTCGTCTCTAAAAAGGACTCGTCAGGTAGCCTACTAGACTACGACTTAC  
 ACGGTAGGTCGTGAACAAGCCTGGAGTACATCTCCTTTGGAAGTAGGAGACCCCTCCGGTCTTGTCCA  
 +  
 FFFFFFFFFFFFFFFFFFFFFFFFFFFFFFFFFFFFFFFFFFFFFFFFFFFFFFFFFFFFFFFFFFFFFFFFFF  
 FFFFFFFFFFFFFFFFFF:FFFFFFFFFFFFFFFFFFFFFFFFFFFFFFFFFFFFFFFFFFFFFFFFFFFFFFFFFFFF  
 @A00155:342:HHGFNDSXY:1:2243:15501:4977 2:N:0:GAACCTAG+TCCGCATA  
 GTGTAAGTTTCGTCTCTAAAAAGGACTCGTCAGGTAGCCTACTAGACTACGACTTACACGGTAGGTCGT  
 GAACAAGCCCGGAGTACATCTCCTTTGGAAGTAGGAGACCCCTCCGGTCTTGTCCAACCTCTGTTTCG  
 +  
 FFFFFFFFFFFFFFFFFFFFFFFFFFFFFFFFFFFFFFFFFFFFFF:FFFFFFFFFFFFFFFFFFFFFFFFFFFFFFFF  
 FFFFFFFFFFFFFFFFFFFFFFFFFFFFFFFFFFFFFFFFFFFFFFFFFFFFFFFFFFFFFFFFFFFFFFFFFF:FFFFFFFFFFFFFFFFFFFF  
 @A00155:342:HHGFNDSXY:1:2243:12048:23202 2:N:0:GAACCTAG+TCCGCATA  
 AGCCCGGAGTACATCTCCTTTGGAACCAGGAGACCCCTCCGGTCTTGTCCAACCTCTGTTTCGGCAGA  
 GGATACCGTGCTCCACAGCTGTAAGGCTGTGGGCCCGAGAGAAGTCGCTCTCTCTCGCCCTCCACATC  
 +  
 FFFFFFFFFFFFFFFFFFFFFFFFFFFFFFFFFFFFFFFFFFFFFF,FFFFFFFFFFFFFFFFFFFFFFFFFFFFFFFF  
 FFFFFFFFFFFFFFFFFFFFFFFFFFFFFFFFFFFFFFFFFFFFFFFFFFFFFFFFFFFFFFFFFFFFFFFFFF  
 @A00155:342:HHGFNDSXY:1:2243:4237:23610 2:N:0:GAACCTAG+TCCGCATA  
 TCTCCTTTGGAAGTAGGAGACCCCTCCGGTCTTGTCCAACCTCTGTTTCGGCAGAGGATACCGTGCTC  
 CACAGCTGTAAGGCTGTGGGCCCGAGAGAAGTCGCTCTCTCTCGCCCTCTACATCCCTCTCGGCATTG  
 +  
 FFFFFFFFFF:FFFFFFFFFFFFFFFFFFFFFFFFFFFF:FFFFFFFFFFFFFFFFFFFFFFFFFFFFFFFFFFFF  
 FFFFFFFFFFFFFFFFFFFFFFFFFFFFFFFFFFFFFFFFFFFFFFFFFFFFFFFFFFFFFFFFFFFFFFFFFF:FF  
 @A00155:342:HHGFNDSXY:1:2244:20166:11397 2:N:0:GAACCTAG+TCCGCATA  
 GACCTAGGAGACCCCTCCGGTCTTGTCCAACCTCTGTTTCGGCAGAGGATACCGTGCTCCACAGCTGT  
 AAGGCTGTGGGCCCGAGAGAAGTCGCTCTCTCTCGCCCTCCACATCCCTCTCGGCATTGAGATGACCA  
 +  
 FF,FFFFFFFFFFFFFFFFFFFFF:FFFFFFFFFFFFFFFFFFFFFFFFFFFFFFFFFFFFFFFFFFFFFFFFFFFF  
 FFFFFFFFFFFFFFFFFFFFFFFFFFFFFFFFFFFFFFFFFFFFFFFFFFFFFFFFFFFFFFFFFFFFFFFFFF  
 @A00155:342:HHGFNDSXY:1:2244:18638:29011 2:N:0:GAACCTAG+TCCGCATA  
 GGACTCGTCAGGTAGCCTACTAGACTACGACTTACACGGTAGGTCGTGAACAAGCCCGGAGTACATCT  
 CCTTTGGAACCAGGAGACCCCTCCGGTCTTGTCCAACCTCTGTTTCGGCAGAGGATACCGTGCTCCAC  
 +  
 FFFFFFFFFFFFFFFFFFFFFFFFFFFFFFFFFFFFFFFFFF:FFFFFFFFFFFFFFFFFFFF,FFFFFFFFFFFFFFFF  
 FFFFFFFFFFFFFFFFFFFFFF:FFFF,FFFFFF:FFFFFFFFFFFF,FFFFF:FFFFFFFFFFFFFFFFFFFF

@A00155:342:HHGFNDSXY:1:2244:19108:29450 2:N:0:GAACCTAG+TCCGCATA  
 GGACTCGTCAGGTAGCCTACTAGACTACGACTTACACGGTAGGTCGTGAACAAGCCCGGAGTACATCT  
 CCTTTGGAACCAGGAGACCCCTCCGGTCTTGTCCAACCTCTGTTTCGGCAGAGGATACCGTGCTCCAC  
 +  
 FFFFFFFFFFFFFFFFFFFFFFFFFFFFFFFFFFFFFFFFFFFFFFFFFFFFFFFFFFFFFFFFFFFFFFFFFF:FFFFFFFFFFFFFFFFFFFFFFFFFFFFFFFFFFFF  
 FFFFFFFFFFFFFFFFFFFFFFFFFFFFFFFFFFFFFFFFFFFFFFFFFFFFFFFFFFFFFFFFFFFFFFFFFF,FFFFFFFFFFFFFFFFFFFFFFFFFFFFFFFFFFFF,FFFF:FFFFFFFFFFFFFFFF  
 @A00155:342:HHGFNDSXY:1:2245:19117:23265 2:N:0:GAACCTAG+TCCGCATA  
 GTCTTGACCAACCTCTGTTTCGGCAGAGGATACCGTGCTCCACAGCTGTAAGGCTGTGGGCCCGAGAG  
 AAGTCGCTCTCTCTCGCCCTCCACATCCCTCTCGGCATTGAGATGACCATAGGCCAGAG  
 +  
 FFFFFFFFFFFFFFFFFFFFFFFFFFFFFFFFFFFFFFFFFFFFFFFFFFFFFFFFFFFFFFFFFFFFFFFFFF:FFFFF:F:FFFFFFFFFFFFFFFF  
 FFFFFFFFFFFFFFFFFFFFFFFFFFFFFFFFFFFFFFFFFFFFFFFFFFFFFFFFFFFFFFFFFFFFFFFFFF:,FFFF:FFFFFF,FFFFFFFFFFFF  
 @A00155:342:HHGFNDSXY:1:2245:5276:32894 2:N:0:GAACCTAG+TCCGCATA  
 GTGAACAAGCCCGGAGTACATCTCCTTTGGAAGTACAGAGACCCCTCCGGTCTTGTCCAACCTCTGTTT  
 CGGCAGAGGATACCGTGCTCCACAGCTGTAAGGCTGTGGGCCCGAGAGACGTCGCTCTCTCTCGCCCT  
 +  
 FFFFFFFFFFFFFFFFFFFFFFFFFFFFFFFFFFFFFFFFFFFFFFFFFFFFFFFFFFFFFFFFFFFFFFFFFF:FFFFFFFFFFFFFFFFFFFFFFFFFFFFFFFFFFFF:  
 FFFFFFFFFFFFFFFFFFFFFFFFFFFFFFFFFFFFFFFFFFFFFFFFFFFFFFFFFFFFFFFFFFFFFFFFFF,F,FFFFFFFFFFFFFFFFFFFFFFFFFFFFFFFFFFFF,FFFF,FFFF:FFFFFFFFFFFFFFFF  
 @A00155:342:HHGFNDSXY:1:2245:5828:35665 2:N:0:GAACCTAG+TCCGCATA  
 TCGGCAGAGGATACCGTGCTCCACAGCTGTAAGGCTGTGGGCCCGAGAGAAGTCACTCTCTCTCGCCC  
 TCCACATCCCTCTCGGCATTGAGATGACCATAGGCCAGAGGTGAGTCCTTAAGTGGACACA  
 +  
 FFFFFFFFFFFFFFFFFFFFFFFFFFFFFFFFFFFFFFFFFFFFFFFFFFFFFFFFFFFFFFFFFFFFFFFFFF:FFFFFFFFFFFFFFFFFFFFFFFFFFFFFFFFFFFF:  
 FFFFFFFFFFFFFFFFFFFFFFFFFFFFFFFFFFFFFFFFFFFFFFFFFFFFFFFFFFFFFFFFFFFFFFFFFF,FFFFFFFFFFFFFFFFFFFFFFFFFFFFFFFFFFFF,FFFF,FFFF:FFFFFFFFFFFFFFFF  
 @A00155:342:HHGFNDSXY:1:2245:20509:36542 2:N:0:GAACCTAG+TCCGCATA  
 ACTAGACTACGACTTACACGGTAGGTCGTGAACAAGCCCGGAGTACATCTCCTTTGGAAGTACAGAGAC  
 CCCTCCGGTCTTGTCCAACCTCTGTTTCGGCAGAGGATACCGTGCTCCACAGCTGTAAGGCTGTGGGC  
 +  
 FFFFFFFFFFFFFFFFFFFFFFFFFFFFFFFFFFFFFFFFFFFFFFFFFFFFFFFFFFFFFFFFFFFFFFFFFF:FFFFFFFFFFFFFFFFFFFFFFFFFFFFFFFFFFFF:  
 FFFFFFFFFFFFFFFFFFFFFFFFFFFFFFFFFFFFFFFFFFFFFFFFFFFFFFFFFFFFFFFFFFFFFFFFFF,FFFFFFFFFFFFFFFFFFFFFFFFFFFFFFFFFFFF,FFFFF  
 @A00155:342:HHGFNDSXY:1:2246:6741:12602 2:N:0:GAACCTAG+TCCGCATA  
 GTGAACAAGCCCGGAGTACATCTCCTTTGGAAGTACAGAGACCCCTCCGGTCTTGTCCAACCTCTGTTT  
 CGGCAGAGGATACCGTGCTCCACAGCTGTAAGGCTGTGGGCCCGAGAGAAGTCGCTCTCTCTCGCCCT  
 +  
 FFFFFFFFFFFFFFFFFFFFFFFFFFFFFFFFFFFFFFFFFFFFFFFFFFFFFFFFFFFFFFFFFFFFFFFFFF:FFFFFFFFFFFFFFFFFFFFFFFFFFFFFFFFFFFF:  
 FFFFFFFFFFFFFFFFFFFFFFFFFFFFFFFFFFFFFFFFFFFFFFFFFFFFFFFFFFFFFFFFFFFFFFFFFF,FFFFFFFFFFFFFFFFFFFFFFFFFFFFFFFFFFFF,FFFFF  
 @A00155:342:HHGFNDSXY:1:2246:18521:28714 2:N:0:GAACCTAG+TCCGCATA  
 GTCCTAAAAAGGACTCGTCAGGTAGCCTACTAGACTACGACTTACACGGTAGGTCGTGAACAAGCCCG  
 GAGTACATCTCCTTTGGAAGTACAGAGACCCCTCCGGTCTTGTCCAACCTCTGTTTCGGCAGAGGATAC  
 +  
 FFFFFFFFFFFFFFFFFFFFFFFFFFFFFFFFFFFFFFFFFFFFFFFFFFFFFFFFFFFFFFFFFFFFFFFFFF:FFFFFFFFFFFFFFFFFFFFFFFFFFFFFFFFFFFF:  
 FFFFFFFFFFFFFFFFFFFFFFFFFFFFFFFFFFFFFFFFFFFFFFFFFFFFFFFFFFFFFFFFFFFFFFFFFF,FFFFFFFFFFFFFFFFFFFFFFFFFFFFFFFFFFFF:FFFFFFFFFFFFFFFF  
 @A00155:342:HHGFNDSXY:1:2246:13105:30295 2:N:0:GAACCTAG+TCCGCATA  
 GGGTTCAAACCATGCCCGCCACACCGCCTTAGATCAGCTGTGTCCACTTAAGGACTCACCTCTGGC  
 CTATGGTCATCTCAATGCCGAGAGGGATGTGGAGGGCGAGAGAGAGCGACTTCTCTCGGGCCACAGC  
 +  
 FFFFFFFFFFFFFFFFFFFFFFFFFFFFFFFFFFFFFFFFFFFFFFFFFFFFFFFFFFFFFFFFFFFFFFFFFF:FFFFFFFFFFFFFFFFFFFFFFFFFFFFFFFFFFFF:  
 FFFFFFFFFFFFFFFFFFFFFFFFFFFFFFFFFFFFFFFFFFFFFFFFFFFFFFFFFFFFFFFFFFFFFFFFFF,FFFFFFFFFFFFFFFFFFFFFFFFFFFFFFFFFFFF:FFFFFFFFFFFFFFFF  
 @A00155:342:HHGFNDSXY:1:2247:15257:10504 2:N:0:GAACCTAG+TCCGCATA  
 TGAGTTGTGTAAGTTTCGTCTAAAAAGGACTCGTCAGGTAGCCTACTAGACTACGACTTACACGGTA  
 GGTCTGTAACAAGCCCGGAGTACATCTCCTTTGGAAGTACAGAGACCCCTCCGGTCTTGTCCAACCTCT  
 +  
 FF::FF:F:FFF:FFF,FF:F:FFFF:FF:FF:FFF:FF:FFFFFFFFFFFF:FF:F::FF:FFFFFF  
 F:FFFFFFFFFFFF:FFFFFFFFFFFF,FFF::FFFFFF,FFFF:FFFF,:F:FFF,FFFFFFFF:FF

@A00155:342:HHGFNDSXY:1:2247:10538:23218 2:N:0:GAACCTAG+TCCGCATA  
CCTACTAGACTACGACTTACACGGTAGGTCGTGAACAAGCCCGGAGTACATCTCCTTTGGAACCAGGA  
GACCCCTCCGGTCTTGTCCAACCTCTGTTTCGGCAGAGGATACCGTGCTCCACAGCTGTAAGGCTGTG  
+  
FFFFFFFFFFFFFFFFFFFFFFFFFFFFFFFFFFFFFFFFFFFFFFFFFFFFFFFFFFFFFFFFFFFFFFFF  
FFFFFFFFFFFFFFFFFFFFFFFFFFFFFFFFFFFFFFFFFFFFFFFFFFFFFFFFFFFFFFFFFFFFFFFF:F  
@A00155:342:HHGFNDSXY:1:2248:21287:30311 2:N:0:GAACCTAG+TCCGCATA  
GTTGTGTAAGTTTCGTCTAAAAAGGACTCGTCAGGTAGCCTACTAGACTACGACTTACACGGTAGGT  
CGTGAACAAGCCCGGAGTACATCTCCTTTGGAAGTAGGAGACCCCTCCGGTCTTGTCCAACCTCTGTT  
+  
FFFFFFFFFFFFFFFFFFFFFFFFFFFFFFFFFFFFFFFFFFFFFFFFFFFFFFFFFFFFFFFFFFFFFFFF  
FFFFFFFFFFFFFFFFFFFFFFFFFFFFFFFFFFFFFFFFFFFFFFFFFFFFFFFFFFFFFFFFFFFFFFFF:FFFFFFF  
@A00155:342:HHGFNDSXY:1:2248:27398:30906 2:N:0:GAACCTAG+TCCGCATA  
AAGGACTCGTCAGGTAGCCTACTAGACTACGACTTACACGGTAGGTCTGTAACAAGCCCGGAGTACAT  
CTCCTTTGGAAGTGGGAGACCCCTCCGGTCTTGTCCAACCTCTGTTTCGGCAGAGGATACCGTG  
+  
FFFFFFFFFFFFFFFFFFFFFFFFFFFFFFFFFFFFFFFFFFFFFFFFFFFFFFFFFFFFFFFFFFFFFFFF:FFFFFFF  
FFFFFFFFFFFFFFFFFFFFFFFFFFFFFFFFFFFFFFFFFFFFFFFFFFFFFFFFFFFFFFFFFFFFFFFF:FFF:FFFFFFFFFFFFFFFF  
@A00155:342:HHGFNDSXY:1:2248:23303:36746 2:N:0:GAACCTAG+TCCGCATA  
GAGACCCCTCCGGTCTTGTCCAACCTCTGTTTCGGCAGAGGATACCGTGCTCCACAGCTGTAAGGCTG  
TGGGCCCAGAGAAGTCGCTCTCTCGCCCTCCACATCCCTCTCGGCATTGAGATGACCATAGGCCA  
+  
FFFFFFFFFFFFFFFFFFFFFFFFFFFFFFFFFFFFFFFFFFFFFFFFFFFFFFFFFFFFFFFFFFFFFFFF  
FFFFFFFFFFFFFFFF:FFFFFFFFFFFFFFFFFFFFFFFFFFFFFFFFFFFFFFFFFFFFFFFF: :FFFFFFFFFFFFFFFF  
@A00155:342:HHGFNDSXY:1:2249:11451:17628 2:N:0:GAACCTAG+TCCGCATA  
GTTCAAACCCATGCCCCGCCACACCGCCTTAGATCAGCTGTGTCCACTTAAGGACTCACCTCTGGCCT  
ATGGTCATCTCAATGCCGAGAGGGATGTGGAGGGCGAGAGAGAGCGACTTCTCTCGGGCCCACAGCCT  
+  
FFFFFFF:FFFFFFFFFFFFFFFFFFFFFFFFFFFFFFFFFFFFFFFFFFFFFFFFFFFFFFFFFFFFFFFF  
:FFFFFFFFFFFFFFFFFFFFFFFFFFFFFFFFFFFFFFFFFFFFFFFFFFFFFFFFFFFFFFFFFFFFFFFF  
@A00155:342:HHGFNDSXY:1:2249:11487:18411 2:N:0:GAACCTAG+TCCGCATA  
GTTCAAACCCATGCCCCGCCACACCGCCTTAGATCAGCTGTGTCCACTTAAGGACTCACCTCTGGCCT  
ATGGTCATCTCAATGCCGAGAGGGATGTGGAGGGCGAGAGAGAGCGACTTCTCTCGGGCCCACAGCCT  
+  
FFFFFFFFFFFFFFFFFFFFFFFFFFFFFFFFFFFFFFFFFFFFFFFFFFFFFFFFFFFFFFFFFFFFFFFF:FFFFFFFFFFFFFFFF:FFFFF  
FFFFFFFFFFFFFFFFFFFFFFFFFFFFFFFFFFFFFFFFFFFFFFFFFFFFFFFFFFFFFFFFFFFFFFFF:  
@A00155:342:HHGFNDSXY:1:2249:16893:24612 2:N:0:GAACCTAG+TCCGCATA  
TAGGAGACCCCTCCGGTCTTGTCCAACCTCTGTTTCGGCAGAGGATACCGTGCTCCACAGCTGTAAGG  
CTGTGGGCCCAGAGAAGTCGCTCTCTCTCGCCCTCCACATCCCTCTCGGCATTGAGATGACCATAGG  
+  
FFFFFFFFFFFFFFFFFFFFFFFFFFFFFFFFFFFFFFFFFFFFFFFFFFFFFFFFFFFFFFFFFFFFFFFF:FFFFFFFFFFFFFFFF  
FFFFFFFFFFFFFFFFFFFFFFFFFFFFFFFFFFFFFFFFFFFFFFFFFFFFFFFFFFFFFFFFFFFFFFFF  
@A00155:342:HHGFNDSXY:1:2251:24505:20541 2:N:0:GAACCTAG+TCCGCATA  
TCTCCTTTGGAAGTAGGAGACCCCTCCGGTCTTGTCCAACCTCTGTTTCGGCAGAGGATACCGTGCTC  
CACAGCTGTAAGGCTGTGGGCCCAGAGAAGTCGCTCTCTCTCGCCACCACATCCCTCTCGGCATTG  
+  
FFFFFFFFFFFFFFFFFFFFFFFFFFFFFFFFFFFFFFFFFFFFFFFFFFFFFFFFFFFFFFFFFFFFFFFF  
FFFFFFFFFFFFFFFFFFFFFFFFFFFFFFFFFFFFFFFFFFFFFFFFFFFFFFFFFFFFFFFFFFFFFFFF,F  
@A00155:342:HHGFNDSXY:1:2252:12662:32628 2:N:0:GAACCTAG+TCCGCATA  
TTTCGTCCTAAAAAGGACTCGTCAGGTAGCCTACTAGACTACGACTTACACGGTAGGTCTGTAACAAG  
CCCGGAGTACATCTCCTTTGGAAGTAGGAGACCCCTCCGGTCTTGTCCAACCTCTGTTTCGGCAGAGG  
+  
FFFFFFFFFFFFFFFFFFFFFFFFFFFFFFFFFFFFFFFFFFFFFFFFFFFFFFFFFFFFFFFFFFFFFFFF  
FFFFFFFFFFFFFFFFFFFFFFFFFFFFFFFFFFFFFFFFFFFFFFFFFFFFFFFFFFFFFFFFFFFFFFFF:FFFF:FFFFFFF:F::,FFFFFFFF:FFFFFFFFFFFFF:



@A00155:342:HHGFNDSXY:1:2253:26630:13636 2:N:0:GAACCTAG+TCCGCATA  
TACATCTCCTTTGGAACCAGGAGACCCCTCCGGTCTTGTC AACCTCTGTTCGGCAGAGGATACCGT  
GCTCCACAGCTGTAAGGCTGTGGGCCCGAGAGAAGTCGCTCTCTCTCGCCCTCCACATCCCTCTCGGC  
+  
FFFFFFFFFFFFFFFFFFFFFFFFFFFFFFFFFFFFFFFFFFFFFFFFFFFFFFFFFFFFFFFFFFFFFFFFFFFFF:  
FFFFFFFFFFFFFFFFFFFFFFFFFFFFFFFFFFFFFFFFFFFFFFFFFFFFFFFFFFFFFFFFFFFFFFFFFFFFFFFFF:  
FFFFFFFFFFFFFFFFFFFFFFFFFFFFFFFFFFFFFFFFFFFFFFFFFFFFFFFFFFFFFFFFFFFFFFFFFFFFFFFFF:  
@A00155:342:HHGFNDSXY:1:2253:4689:17879 2:N:0:GAACCTAG+TCCGCATA  
CTTCGAGTTGTGTAAGTTTCGTCCTAAAAAGGACTCGTCAGGTAGCCTACTAGACTACGACTTACACG  
GTAGGTCGTGAACAAGCCCCGGAGTACATCTCCTTTGGA ACTAGGAGACCCCTCCGGTCTTGTC AACCC  
+  
FFFFFFFFFFFFFFFFFFFFFFFFFFFFFFFFFFFFFFFFFFFFFFFFFFFFFFFFFFFFFFFFFFFFFFFFFFFFF:  
FFFFFFFFFFFFFFFFFFFFFFFFFFFFFFFFFFFFFFFFFFFFFFFFFFFFFFFFFFFFFFFFFFFFFFFFFFFFFFFFF:  
FFFFFFFFFFFFFFFFFFFFFFFFFFFFFFFFFFFFFFFFFFFFFFFFFFFFFFFFFFFFFFFFFFFFFFFFFFFFFFFFF:  
@A00155:342:HHGFNDSXY:1:2254:28293:4993 2:N:0:GAACCTAG+TCCGCATA  
ACATCTCCTTTGGA ACTAGGAGACCCCTCCGGTCTTGTC AACCTCTGTTCGGCAGAGGATACCGTG  
CTCCACAGCTGTAAGGCTGTGGGCCCGAGAGAAGTCGCTCTCTCTCGCCCTCTACATCCC  
+  
FFFFF:FFFFFFFFFFFFFFFFFFFFFFFFFFFFFFFFFFFFFFFFFFFFFFFFFFFFFFFFFFFFFFFFFFFFFFF:  
FFFFFFFFFFFFFFFFFFFFFFFFFFFFFFFFFFFFFFFFFFFFFFFFFFFFFFFFFFFFFFFFFFFFFFFFFFFFFFFFF:  
FFFFFFFFFFFFFFFFFFFFFFFFFFFFFFFFFFFFFFFFFFFFFFFFFFFFFFFFFFFFFFFFFFFFFFFFFFFFFFFFF:  
@A00155:342:HHGFNDSXY:1:2254:2691:12884 2:N:0:GAACCTAG+TCCGCATA  
AGGACGAAACCGTCGTTACTCTTCGAGTTGTGTAAGTTTCGTCCTAAAAAGGACTCGTCAGGTAGCCT  
ACTAGACTACGACTTACACGGTAGGTCGTGAACAAGCCCCGGAGTACATCTCCTTTGGA ACTAGGAGAC  
+  
FFFFFFFFFFFFFFFFFFFFFFFFFFFFFFFFFFFFFFFFFFFFFFFFFFFFFFFFFFFFFFFFFFFFFFFFFFFFF:  
FFFFFFFFFFFFFFFFFFFFFFFFFFFFFFFFFFFFFFFFFFFFFFFFFFFFFFFFFFFFFFFFFFFFFFFFFFFFFFFFF:  
FFFFFFFFFFFFFFFFFFFFFFFFFFFFFFFFFFFFFFFFFFFFFFFFFFFFFFFFFFFFFFFFFFFFFFFFFFFFFFFFF:  
@A00155:342:HHGFNDSXY:1:2254:25843:13432 2:N:0:GAACCTAG+TCCGCATA  
TAGGACGAAACTTACACA ACTCGAAGAGTAACGACGGTTTTCGTCCTTGGAACGGACTCATCAGGGAGC  
TACTAGACTCCGACCGTCATGGGGGTTCAAACCCATGCCCGCCACACCGCCTTAGATCAGCTGTGT  
+  
FFFFFFFFFFFFFFFFFFFFFFFFFFFFFFFFFFFFFFFFFFFFFFFFFFFFFFFFFFFFFFFFFFFFFFFFFFFFF:  
FFFFFFFFFFFFFFFFFFFFFFFFFFFFFFFFFFFFFFFFFFFFFFFFFFFFFFFFFFFFFFFFFFFFFFFFFFFFFFFFF:  
FFFFFFFFFFFFFFFFFFFFFFFFFFFFFFFFFFFFFFFFFFFFFFFFFFFFFFFFFFFFFFFFFFFFFFFFFFFFFFFFF:  
@A00155:342:HHGFNDSXY:1:2254:24596:22357 2:N:0:GAACCTAG+TCCGCATA  
GGAACGGACTCATCAGGGAGCCTACTAGACTCCGACCGTCATGGGGGTTCAAACCCATGCCCGGCTAC  
ACCGCCTTAGATCAGCTGTGTCCACTTAAGGACTCACCTCTGGCCTATGGTCATCTCAATGCCGAGAG  
+  
FFFFFFFFFFFFFFFFFFFFFFFFFFFFFFFFFFFFFFFFFFFFFFFFFFFFFFFFFFFFFFFFFFFFFFFFFFFFF:  
FFFFFFFFFFFFFFFFFFFFFFFFFFFFFFFFFFFFFFFFFFFFFFFFFFFFFFFFFFFFFFFFFFFFFFFFFFFFFFFFF:  
FFFFFFFFFFFFFFFFFFFFFFFFFFFFFFFFFFFFFFFFFFFFFFFFFFFFFFFFFFFFFFFFFFFFFFFFFFFFFFFFF:  
@A00155:342:HHGFNDSXY:1:2254:28863:22764 2:N:0:GAACCTAG+TCCGCATA  
CCCGGAGTACATCTCCTTTGGA ACTAGGAGACCCCTCCGGTCTTGTC AACCTCTGTTCGGCAGAGG  
ATACCGTGCTCCACAGCTGTAAGGCTGTGGGCCCGAGAGAAGTCGCTCTCTCTCGCCCTCCACATCCC  
+  
FFFFFFFFFFFFFFFFFFFFFFFFFFFFFFFFFFFFFFFFFFFFFFFFFFFFFFFFFFFFFFFFFFFFFFFFFFFFF:  
FF:FFFFF:FFFFFFFFFFFFFFFFFFFFFFFFFFFFFFFFFFFFFFFFFFFFFFFFFFFFFFFFFFFFFFFFFFFFF:  
@A00155:342:HHGFNDSXY:1:2254:8639:26569 2:N:0:GAACCTAG+TCCGCATA  
GCCTATGGTCATCTCAATGCCGAGAGGGATGTGAAGGGCGAGAGAGAGCGACTTCTCTCGGGCCCACA  
GCCTTACAGCTGTGGAGCACGGTATCCTCTGCCGAAACAGAGGTTGGACAAGACCGGAG  
+  
FFFFFFFFFFFFFFFFFFFFFFFFFFFFFFFFFFFFFFFFFFFFFFFFFFFFFFFFFFFFFFFFFFFFFFFFFFFFF:  
FFFFF:FFFFFFFFFFFFFFFFFFFFFFFFFFFFFFFFFFFFFFFFFFFFFFFFFFFFFFFFFFFFFFFFFFFFFFF:  
@A00155:342:HHGFNDSXY:1:2254:8241:27633 2:N:0:GAACCTAG+TCCGCATA  
TACGACTTACACGGTAGGTCGTGAACAAGCCCCGGAGTACATCTCCTTTGGA ACTAGGAGACCCCTCCG  
GTCTTGTC AACCTCTGTTCGGCAGAGGATACCGTGCTCCACAGCTGTAAGGCTGTGGGCCCG

[illegible]

[illegible]

@A00155:342:HHGFNDSXY:1:2261:30092:9142 2:N:0:GAACCTAG+TCCGCATA  
CGAGTTGTGTAAGTTTCGTCTAAAAAGGACTCGTCAGGTAGCCTACTAGACTACGACTTACACGGTA  
GGTCGTGAACAAGCCCGGAGTACATCTCCATTGGAAGTACGAGACCCCTCCGGTCTTGTCCAACCTCT  
+  
FFFFF:FFFFF:FFFFFFFFFFFFFFFFF:FFFFF::FFFFFFFFFFFFFFFFFFFFFFFFF,FFFFF  
:FFFFF,FF::F,FF:,FF:FF,FF:FFF,FFFF:F,FFFFF:,F:,FF:FFF:F:FF:FFF,,::  
@A00155:342:HHGFNDSXY:1:2261:3341:17926 2:N:0:GAACCTAG+TCCGCATA  
GGTCTTGTCCAACCTCTGTTTCGGCAGAGGATACCGTGCTCCACAGCTGTAAGGCTGTGGGCCCGAGA  
GAAGTCGCTCTCTCTCGCCCTTACATCCCTCTCGGCATTGAGATGACCATAGGCCAGAG  
+  
FFFFFFFFFFFFFFFFF:FFFFFFFFFFFFFFFFFFFFFFFFFFFFFFFFFFFFFFFFF:FFFFF  
FFFFFFFFFFFFFFFFFFFFFFFFFFFFFFFFFFFFFFFFF::FFF:FF:FFFFFFFF,FFF:F  
@A00155:342:HHGFNDSXY:1:2261:9588:27712 2:N:0:GAACCTAG+TCCGCATA  
ACTCTTCGAGTTGTGTAAGTTTCGTCTAAAAAGGACTCGTCAGGTAGCCTACTAGACTACGACTTAC  
ACGGTAGGTCGTGAACAAGCCCGGAGTACATCTCCTTTGGAAGTACGAGACCCCTCCGGTCTTGTCCA  
+  
FFFFFFFFF:FFFFFFFFF:FFFFFFFFF:FFFFFFFFFFFFFFFFF:FFFFFFFFFFFFFFFFFFFFF  
FF:FFFFFFFFFFFFFFFFFFFFFFFFFFFFFFFFFFFFFFFFF:FFFFFFFFFFFFFFFFFFFFF  
@A00155:342:HHGFNDSXY:1:2262:22715:6104 2:N:0:GAACCTAG+TCCGCATA  
TTTCGTCTAAAAAGGACTCGTCAGGTAGCCTACTAGACTACGACTTACACGGTAGGTCGTGAACAAG  
CCCGGAGTACATCTCCTTTGGAAGTACGAGACCCCTCCGGTCTTGTCCAACCTCTGTTTCGGCAGAGG  
+  
FFFFFFFFFFFFFFFFFFFFFFFFFFFFFFFFFFFFFFFFFFFFFFFFF:FFFFFFFFFFFFF:  
FFFFFFFFFFFFFFFFFFFFFFFFFFFFFFFFF:FFFFFFFFFFFFFFFFFFFFFFFFFFFFFFFFF  
@A00155:342:HHGFNDSXY:1:2262:15962:6872 2:N:0:GAACCTAG+TCCGCATA  
TCCTAAAAAGGACTCGTCAGGTAGCCTACTAGACTACGACTTACACGGTAGGTCGTGAACAAGCCCGG  
AGTACATCTCCTTTGGAAGTACGAGACCCCTCCGGTCTTGTCCAACCTCTGTTTCGGCAGAGGATACC  
+  
FFFFFFFFFFFFFFFFFFFFFFFFFFFFFFFFFFFFFFFFFFFFFFFFF:FFFFFFFFFFFFF  
FFFFFFFFFFFFFFFFFFFFFFFFFFFFFFFFFFFFFFFFFFFFFFFFF,FF  
@A00155:342:HHGFNDSXY:1:2262:9372:31000 2:N:0:GAACCTAG+TCCGCATA  
GGACTCGTCAGGTAGCCTACTAGACTACGACTTACACGGTAGGTCGTGAACAAGCCCGGAGTACATCT  
CCTTTGGAACCAGGAGACCCCTCCGGTCTTGTCCAACCTCTGTTTCGGCAGAGGATACCGTGCTCCAC  
+  
FFFFFFFFFFFFFFFFFFFFFFFFF:FFFFFFFFFFFFFFFFFFFFFFFFFFFFFFFFFFFFF  
FFFFFFFFFFFFFFFFFFFFFFFFFFFFFFFFFFFFFFFFFFFFFFFFF:FFFF:FFFFFFFFFFFFF  
@A00155:342:HHGFNDSXY:1:2263:14326:16908 2:N:0:GAACCTAG+TCCGCATA  
TCTTCGAGTTGTGTAAGTTTCGTCTAAAAAGGACTCGTCAGGTAGCCTACTAGACTACGACTTACAC  
GGTAGGTCGTGAACAAGCCCGGAGTACATCTCCTTTGGAAGTACGAGACCCCTCCGGTCTTGTCCAAC  
+  
FFFFFFFFF:FFFFFFFFFFFFFFFFFFFFFFFFFFFFFFFFFFFFFFFFF:FFFFFFFFFFFFF  
FFFFFFFFFFFFFFFFFFFFFFFFF:FFFFFFFFFFFFF,FFFFFFFFFFFFFFFFFFFFF  
@A00155:342:HHGFNDSXY:1:2263:9815:18270 2:N:0:GAACCTAG+TCCGCATA  
CAAGGACGAAACCGTCGTTACTCTTCGAGTTGTGTAAGTTTCGTCTAAAAAGGACTCGTCAGGTAGC  
CTACTAGACTACGACTTACACGGTAGGTCGTGAACAAGCCCGGAGTACATCTCCTTTGGAACCAGGAG  
+  
FFFFFFFFFFFFFFFFFFFFFFFFFFFFFFFFFFFFFFFFFFFFFFFFF:F:FFFFFFFFF:FFFFFFFFF  
FFFFFFFFFFFFFFFFFFFFFFFFFFFFFFFFFFFFFFFFFFFFFFFFF:F:FFFFFFFFFFFFFFFFF  
@A00155:342:HHGFNDSXY:1:2263:30563:31313 2:N:0:GAACCTAG+TCCGCATA  
GGACTCGTCAGGTAGCCTACTAGACTACGACTTACACGGTAGGTCGTGAACAAGCCCGGAGTACATCT  
CCTTTGGAACCAGGAGACCCCTCCGGTCTTGTCCAACCTCTGTTTCGGCAGAGGATACCGTGCTCCAC  
+  
FFFFFFFFFFFFF:FFFFFFFFFFFFFFFFFFFFFFFFFFFFFFFFFFFFF:FFFFFFFFF,FF:FFFFFFFFF  
FFFFFFFFFFFFFFFFF:FFFFFFFFF::FFFFFFFFF:FFFFFFF,F:F:FFFFFFFFFFFFFFFFF

[illegible]

@A00155:342:HHGFNDSXY:1:2266:27480:18333 2:N:0:GAACCTAG+TCCGCATA  
TCCTAAAAAGGACTCGTCAGGTAGCCTACTAGACTACGACTTACACGGTAGGTCTGTAACAATCCCCGG  
AGTACATCTCCTTTGGAAGTAGGAGACCCCTCCGGTCTTGCCAACCTCTGTTTCGGCAGAGGATACC  
+  
F:FFF,FFFFFFFFFFFFFFFFFFFFFFFFFFFF,FF,FFFFFFFFF:FFFFFFFFFFFFFFF:FFFFF,FFFFF  
FFFFFFFFF:FFFF::FFFFFF:F:F:F,FF:FFF:FFFFFFFFF:FFFFFFFFFFFFFFFFFFFFFFF  
@A00155:342:HHGFNDSXY:1:2266:18168:29763 2:N:0:GAACCTAG+TCCGCATA  
TTTGAAGTAGGAGACCCCTCCGGTCTTGCCAACCTCTGTTTCGGCAGAGGATACCGTGCTCCACAG  
CTGTAAGGCTGTGGGCCCGAGAGAAGTCGCTCTCTCGCCCTCCACATCCCTCTCGGCATTGAGATG  
+  
FFFFFFFFFFFFFFFFFFFFFFFFFFFFFFFFFFFFFFFFFFFFFFFFFFFFFFFFFFFFFFFFFFFFFFFFF:  
FFFFFFFFFFFFFFFFFFFFFFFFFFFFFFFFFFFFFFFFFFFFFFFFFFFFFFFFFFFFFFFFFFFFFFF,:FFFFFF  
@A00155:342:HHGFNDSXY:1:2267:25111:3427 2:N:0:GAACCTAG+TCCGCATA  
TACACGGTAGGTCTGTAACAAGCCCGGAGTACATCTCCTTTGGAAGTAGGAGACCCCTCCGGTCTTG  
CCAACCTCTGTTTCGGCAGAGGATACCGTGCTCCACAGCTGTAAGGCTGTGGGCCCGAGAGAAGTCGC  
+  
FFFFFFFFFFFFFFFFFFFFFFFFFFFFFFFFFFFFFFFFFFFFFFFFFFFFFFFFFFFFFFFFFFFFFFFFF:FFF  
FFFFFFFFFFFFFFFFFFFFFFFFFFFFFFFFFFFFFFFFFFFFFFFFFFFFFFFFFFFFFFFFFFFFFFFFF,  
@A00155:342:HHGFNDSXY:1:2267:23909:5666 2:N:0:GAACCTAG+TCCGCATA  
TACACGGTAGGTCTGTAACAAGCCCGGAGTACATCTCCTTTGGAAGTAGGAGACCCCTCCGGTCTTG  
CCAACCTCTGTTTCGGCAGAGGATACCGTGCTCCACAGCTGTAAGGCTGTGGGCCCGAGAGAAGTCGC  
+  
FF:FFFFFF,F,FF:F,FFFFFF:FF::F:F,FF:,F:FFFFFF:,FFFFFF,,F,FFF:F:FF:F:FFFF  
FFFFFFFF:,FF,FFFFFFFFF,F:FFFF:,F:FF:FFFF,FFFF::FFF:,FF:FFFFFFFF,FFFF  
@A00155:342:HHGFNDSXY:1:2267:4065:9502 2:N:0:GAACCTAG+TCCGCATA  
GTGAACAAGCCCGGAGTACATTTCTTTGGAAGTAGGAGACCCCTCCGGTCTTGCCAACCTCTGTTT  
CGGCAGAGGATACCGTGCTCCACAGCTGTAAGGCTGTGGGCCCGAGAGAAGTCGCTCTCTCGCCCT  
+  
FFFFFFFFFFFFFFFFFFFFFFFFFFFFFFFFFFFFFFFFFFFFFFFFFFFFFFFFFFFFFFFFFFFFFFFFF:FFFFFFFFFFFFF,FFFFFFFFFFFFFFFFFFFF  
FFFFFFFFFFFFFFFFFFFFFFFFFFFFFFFFFFFFFFFFFFFFFFFFFFFFFFFFFFFFFFFFFFFFFFFFF:,FFFFFFFFFFFFFFFFFFFFF  
@A00155:342:HHGFNDSXY:1:2267:2419:10567 2:N:0:GAACCTAG+TCCGCATA  
GACCCCTCCGGTCTTGCCAACCTCTGTTTCGGCAGAGGATACCGTGCTCCACAGCTGTAAGGCTGTG  
GGGCCGAGAGAAGTCGCTCTCTCTCGCCCTCTACATCCCTCTCGGCATTGAGATGACCATAGGC  
+  
FFFFFFFFFFFFFFFFFFFFFFFFFFFFFFFFFFFFFFFFFFFFFFFFFFFFFFFFFFFFFFFFFFFFFFFFF:FFFFFF:FFFFFFFFFFFFFFFFFFFFFFFFFFFFF  
FFFFFFFFFFFFFFFFFFFFFFFFFFFFFFFFFFFFFFFFFFFFFFFFFFFFFFFFFFFFFFFFFFFFFFFFF:FFFFFFFFFFFFFFFFFFFFF  
@A00155:342:HHGFNDSXY:1:2268:28275:9345 2:N:0:GAACCTAG+TCCGCATA  
ACTTACACGGTAGGTCTGTAACAAGCCCGGAGTACATCTCCTTTGGAAGTAGGAGACCCCTCCGGTCT  
TGTTCAACCTCTGTTTCGGCAGAGGATACCGTGCTCCACAGCTGTAAGGCTGTGGGCCCGAGAGAAGT  
+  
FFFFFFF:FFFFFFFFFFFFFFFFFFFFFFFFFFFFFFFFFFFFFFFFFFFFFFFFFFFFFFFFFFFFFFFFFFFFF  
FF:FFFFFFFFFFFF:FFFFFF:FFFFFFFFFFFFFFFFFFFFFFFFFFFFFFFFFFFFFFFFFFFFFFFFF:FFF  
@A00155:342:HHGFNDSXY:1:2269:5683:4883 2:N:0:GAACCTAG+TCCGCATA  
CCTACTAGACTACGACTTACACGGTAGGTCTGTAACAAGCCCGGAGTACATCTCCTTTGGAAGTAGGA  
GACCCCTCCGGTCTTGCCAACCTCTGTTTCGGCAGAGGATACCGTGCTCCACAGCTGTAAGGCTGTG  
+  
FFFFFFFFF:FFFFFFFFFFFFFFFFFFFFFFFFFFFFFFFFFFFFFFFFFFFFFFFFFFFFFFFFFFFFFFFFFFFFF  
FFFFFFFFFFFFFFFFFFFFFFFFFFFFFFFFFFFFFFFFFFFFFFFFFFFFFFFFFFFFFFFFFFFFFFFFF:FFFFFFFFFFFFFFFFFFFFF  
@A00155:342:HHGFNDSXY:1:2269:8359:16063 2:N:0:GAACCTAG+TCCGCATA  
GGACTCGTCAGGTAGCCTACTAGACTACGACTTACACGGTAGGTCTGTAACAAGCCCGGAGTACATCT  
CCTTTGGAAGTAGGAGACCCCTCCGGTCTTGCCAACCTCTGTTTCGGCAGAGGATACCGTGCTCCAC

```
@A00155:342:HHGFNDSXY:1:2269:17526:37012 2:N:0:GAACCTAG+TCCGCATA
AGTACATCTCCTTTGGAAGTACGAGACCCCTCCGGTCTTGTCCAACCTCTGTTTCGGCAGAGGATAACC
GTGCTCCACAGCTGTAAGGCTGTGGGCCCCGAGAGAAGTCGCTCTCTCTCGCCCTCCACATCCCTCTCG
+
FFFFFFFFFFFFFFFFFFFFFFFFFFFFFFFFFFFFFFFFFFFFFFFFFFFFFFFFFFFFFFFFFFFFFFFF:FFFFFFFFFFFFFFFFFFFF
FFFFFFFFFFFFFFFFFFFFFFFFFFFFFFFFFFFFFFFFFFFFFFFFFFFFFFFFFFFFFFFFFFFFFFFF:FFFFFFFFFFFFFFFFFFFF,FFFFFFFFFFFFFFFFFFFFFFFFFFFFFFFFFFFFFFFFFFFFFFFF:FF
@A00155:342:HHGFNDSXY:1:2269:17526:37012 2:N:0:GAACCTAG+TCCGCATA
CCTACTAGACTACGACTTACACGGTAGGTCGTGAACAAGCCCGAGTACATCTCCTTTGGAAGTACGAG
GACCCCTCCGGTCTTGTCCAACCTCTGTTTCGGCAGAGGATAACCGTGCTCCACAGCTGTAAGGCTGTG
+
FFFFFFFFFFFFFFFFFFFFFFFFFFFFFFFFFFFFFFFFFFFFFFFFFFFFFFFFFFFFFFFFFFFFFFFF,FFFFFFFFFFFFFFFFFFFFFFFFFFFFFFFFFFFFFFFFFFFFFFFFFFFFFFFFFFFFFFFF
FFFFFFFFFFFFFFFFFFFFFFFFFFFFFFFFFFFFFFFFFFFFFFFFFFFFFFFFFFFFFFFFFFFFFFFF:FFFFFFFFFFFFFFFFFFFFFFFFFFFFFFFFFFFFFFFFFFFFFFFFFFFFFFFFFFFFFFFF
@A00155:342:HHGFNDSXY:1:2270:25418:14669 2:N:0:GAACCTAG+TCCGCATA
CGGAGTACATCTCCTTTGGAAGTACGAGACCCCTCCGGTCTTGTCCAACCTCTGTTTCGGCAGAGGAT
ACCGTGCTCCACAGCTGTAAGGCTGTGGGCCCCGAGAGAAGTCGCTCTCTCTCGCCCTCTACATCCCTC
+
FFFFFFFFFFFFFFFFFFFFFFFFFFFFFFFFFFFFFFFFFFFFFFFFFFFFFFFFFFFFFFFFFFFFFFFF,FFFFFFFFFFFFFFFFFFFFFFFFFFFFFFFFFFFFFFFFFFFFFFFFFFFFFFFFFFFFFFFF
FFFFFFFFFFFFFFFFFFFFFFFFFFFFFFFFFFFFFFFFFFFFFFFFFFFFFFFFFFFFFFFFFFFFFFFF:FFFFFFFFFFFFFFFFFFFFFFFFFFFFFFFFFFFFFFFFFFFFFFFFFFFFFFFFFFFFFFFF
@A00155:342:HHGFNDSXY:1:2270:30400:15154 2:N:0:GAACCTAG+TCCGCATA
ACCTCTGTTTCGGCAGAGGATAACCGTGCTCCACAGCTGTAAGGCTGTGGGCCCCGAGAGAAGTCGCTCT
CTCTCGCCCTTCACATCCCTCTCGGCATTGAGATGACCATAGGCCAGAGGTGAGTCCTTAAGTGGACA
+
FFFFFFFFFFFFFFFFFFFFFFFFFFFFFFFFFFFFFFFFFFFFFFFFFFFFFFFFFFFFFFFFFFFFFFFF,FF
FFFFFFFFFFFFFFFFFFFFFFFFFFFFFFFFFFFFFFFFFFFFFFFFFFFFFFFFFFFFFFFFFFFFFFFF:FFFFFFFFFFFFFFFFFFFFFFFFFFFFFFFFFFFFFFFFFFFFFFFFFFFFFFFF:FF:
@A00155:342:HHGFNDSXY:1:2270:30418:15374 2:N:0:GAACCTAG+TCCGCATA
ACCTCTGTTTCGGCAGAGGATAACCGTGCTCCACAGCTGTAAGGCTGTGGGCCCCGAGAGAAGTCGCTCT
CTCTCGCCCTTCACATCCCTCTCGGCATTGAGATGACCATAGGCCAGAGGTGAGTCCTTAAGTGGACA
+
FFFFFFFFFFFFFFFFFFFFFFFFFFFFFFFFFFFFFFFFFFFFFFFFFFFFFFFFFFFFFFFFFFFFFFFFFFFFFFFFFFFFFFFFFFFFFFFFFFFFFFFFFFFFFFFFFFFFFFFF
FFFFFFFFFFFFFFFFFFFFFFFFFFFFFFFFFFFFFFFFFFFFFFFFFFFFFFFFFFFFFFFFFFFFFFFF:FFFFFFFFFFFFFFFFFFFFFFFFFFFFFFFFFFFFFFFFFFFFFFFFFFFFFFFF:
@A00155:342:HHGFNDSXY:1:2270:10303:15765 2:N:0:GAACCTAG+TCCGCATA
AAACTTACACAACCTCGAAGAGTAACGACGGTTTCGTCTTGGAACGGACTCATCAGGGAGCCTACTAG
ACTCCGACCGTCATGGGGGTTCAAACCCATGCCCGCTACACCGCCTTAGATCAGCTGTGTCCACTTA
+
FFFFFFFFFFFFFFFFFFFFFFFFFFFFFFFFFFFFFFFFFFFFFFFFFFFFFFFFFFFFFFFFFFFFFFFFFFFFFFFFFFFFFFFFFFFFFFFFFFFFFFFFFFFFFFFFFFFFFFFF
FFFFFFFFFFFFFFFFFFFFFFFFFFFFFFFFFFFFFFFFFFFFFFFFFFFFFFFFFFFFFFFFFFFFFFFF:FFFFFFFFFFFFFFFFFFFFFFFFFFFFFFFFFFFFFFFFFFFFFFFFFFFFFFFF:
@A00155:342:HHGFNDSXY:1:2271:10520:9721 2:N:0:GAACCTAG+TCCGCATA
ACGAAACCGTCGTTACTCTTCGAGTTGTGTAAGTTTCGTCTTAAAAAGGACTCGTCAGGTAGCCTACT
AGACTACGACTTACACGGTAGGTCGTGAACAAGCCCGAGTACATCTCCTTTGGAAGTACGAGACCCC
+
F:FFFFFFFFFFFFFFFFFFFF,F:FFFFFFFFFFFFFFFFFFFF:FFFF,FFFF,:FFFFFFFF:FFFFFFFF:FFFFFFFF
:F:FFFFFFFFFFFFFFFFFFFF:FF,FFFFFFFF:FFFF:FFFFFFFFFFFFFFFFFFFFFFFFFFFFFFFFFFFFFFFF
@A00155:342:HHGFNDSXY:1:2271:27109:11898 2:N:0:GAACCTAG+TCCGCATA
ACTCTTCGAGTTGTGTAAGTTTCGTCTTAAAAAGGACTCGTCAGGTAGCCTACTAGACTACGACTTAC
ACGGTAGGTCGTGAACAAGCCCGAGTACATCTCCTTTGGAAGTACGAGACCCCTCCGGTCTTGTCCA
+
FFFFFFFFFFFFFFFFFFFFFFFFFFFFFFFFFFFFFFFFFFFFFFFFFFFFFFFFFFFFFFFFFFFFFFFFFFFFFFFFFFFFFFFFFFFFFFFFFFFFFFFFFFFFFFFFFFFFFFFF
:FFFFFFFFFFFFFFFFFFFFFFFFFFFFFFFFFFFFFFFFFFFFFFFFFFFFFFFFFFFFFFFFFFFFFFFFFFFFFFFFFFFFFFFF
@A00155:342:HHGFNDSXY:1:2271:27163:13338 2:N:0:GAACCTAG+TCCGCATA
ACTCTTCGAGTTGTGTAAGTTTCGTCTTAAAAAGGACTCGTCAGGTAGCCTACTAGACTACGACTTAC
ACGGTAGGTCGTGAACAAGCCCGAGTACATCTCCTTTGGAAGTACGAGACCCCTCCGGTCTTGTCCA
+
FFFFFFFFFFFFFFFFFFFFFFFFFFFFFFFFFFFFFFFFFFFFFFFFFFFFFFFFFFFFFFFFFFFFFFFF:FFFFFFFFFFFFFFFF:FFFFFFFFFFFFFFFF
FFFFFFFFFFFFFFFFFFFFFFFF:F:FFFFFF:FFFFFFFFFFFF:F:FFFFFFFF:FFFF,FFFFFFFFFFFF
```

@A00155:342:HHGFNDSXY:1:2271:31720:15374 2:N:0:GAACCTAG+TCCGCATA  
GGACTCGTCAGGTAGCCTACTAGACTACGACTTACACGGTAGGTCGTGAACAAGCCCGGAGTACATCT  
CCTTTGGAAGTAAAGGAGACCCCTCCGGTCTTGTC AACCTCTGTTTCGGCAGAGGATACCGTGCTCCAC  
+  
FFFFFFFFF:FFFFFFFFFFFFFFFFFFFFFFFFFFFFFFFFFFFFFFFFFFFFFFFFFFFFFFFFFFFFF:FFFFF  
FFFFFFFFFFFFFFFF:F:FFFFFFFF,F:FFFFFF,:FFFFFFFFFFFFFFFFFFFFFFFF:FFFFFFFF  
@A00155:342:HHGFNDSXY:1:2271:5213:32221 2:N:0:GAACCTAG+TCCGCATA  
GTTTCGTCTAAAAAGGACTCGTCAGGTAGCCTACTAGACTACGACTTACACGGTAGGTCGTGAACAA  
GCCCGGAGTACATCTCCTTTGGAAGTAAAGGAGACCCCTCCGGTCTTGTC AACCTCTGTTTCGGCAGAG  
+  
FFFFFFFFFFFFFFFFFFFFFFFFFFFFFFFFFFFFFFFFFFFFFFFFFFFFFFFFFFFFFFFFFFFFFFFFF  
FFFFFFFFFFFFFFFFFFFFFFFFFFFFFFFFFFFFFFFFFFFFFFFFFFFFFFFFFFFFFFFFFFFFFFFF:F  
@A00155:342:HHGFNDSXY:1:2272:18041:3959 2:N:0:GAACCTAG+TCCGCATA  
ACTAGACTACGACTTACACGGTAGGTCGTGAACAAGCCCGGAGTACATCTCCTTTGGAAGTAAAGGAGAC  
CCCTCCGGTCTTGTC AACCTCTGTTTCGGCAGAGGATACCGTGCTCCACAGCTGTAAGGCTGTGGGC  
+  
FFFFFFFFFFFFFFFFFFFFFFFFFFFFFFFFFFFFFFFFFFFFFFFFFFFFFFFFFFFFFFFFFFFFFFFFF  
FFFFFFFFFFFFFFFFFFFFFFFFFFFFFFFFFFFFFFFFFFFFFFFFFFFFFFFFFFFFFFFFFFFFFFFF:F  
@A00155:342:HHGFNDSXY:1:2272:29767:15499 2:N:0:GAACCTAG+TCCGCATA  
ACTTACACGGTAGGTCGTGAACAAGCCCGGAGTACATCTCCTTTGGAAGTAAAGGAGACCCCTCCGGTCT  
TGTC AACCTCTGTTTCGGCAGAGGATACCGTGCTCCACAGCTGTAAGGCTGTGGGCCCGAGAGAAGT  
+  
FFFFFFFFFFF:FFFFFFFFFFFFFFFFFFFFFFFFFFFFFFFFFFFFFFFFFFFFFFFFFFFFFFFFFFFFF:  
FFFFFFFFFFFFFFFF:F:FFFFFFFF,F:,FF:FFFFFFFF:FFFFFF:FFFFFFFFFFFFFFFF:  
@A00155:342:HHGFNDSXY:1:2272:14145:28745 2:N:0:GAACCTAG+TCCGCATA  
GAGACCCCTCCGGTCTTGTC AACCTCTGTTTCGGCAGAGGATACCGTGCTCCACAGCTGTAAGGCTG  
TGGGCCCGAGAGAAGTCGCTCTCTCGCCCTCCACATCCCTCTCGGCATTGAGATGAC  
+  
FFFFFFFFFFFFFFFFFFFFFFFFFFFFFFFFFFFFFFFFFFFFFFFFFFFFFFFFFFFFFFFFFFFFFFFFF  
FFFFFFFFFFFFFFFFFFFFFFFFFFFFFFFFFFFFFFFFFFFFFFFFFFFFFFFFFFFFFFFFFFFFFFFF:  
@A00155:342:HHGFNDSXY:1:2272:11831:31532 2:N:0:GAACCTAG+TCCGCATA  
TCTTCGAGTTGTGTAAGTTTCGTCTAAAAAGGACTCGTCAGGTAGCCTACTAGACTACGACTTACAC  
GGTAGGTCGTGAACAAGCCCGGAGTACATCTCCTTTGGAAGTAAAGGAGACCCCTCCGGTCTTGTC AAC  
+  
FFFFFFFFFFFFFFFFFFFFFFFFFFFFFFFFFFFFFFFFFFFFFFFFFFFFFFFFFFFFFFFFFFFFFFFFF  
FFFFFFFF:F:FFFFFFFFFFFFFFFFFFFFFFFFFFFFFFFFFFFFFFFFFFFFFFFFFFFFFFFFFFFFF,  
@A00155:342:HHGFNDSXY:1:2272:4942:35133 2:N:0:GAACCTAG+TCCGCATA  
GAACGGACTCATCAGGGAGCCTACTAGACTCCGACCGTCATGGGGTTCAAACCCATGCCACCACAC  
CCGCCTTAGATCAGCTGTGTCCAATTAAGGACTCACCTCTGGCCTATGGTCATCTCAATGCCGAGAGG  
+  
FFFFFFFFFFFFFFFFFFFFFFFFFFFFFFFFFFFFFFFFFFFFFFFFFFFFFFFFFFFFFFFFFFFFFFFFF  
FFFFFFFF:FFFFFFFFFFFFFFFFFFFFFFFFFFFFFFFFFFFFFFFFFFFFFFFFFFFFFFFFFFFFF,FFF:FF  
@A00155:342:HHGFNDSXY:1:2272:18484:36824 2:N:0:GAACCTAG+TCCGCATA  
GGAGTACATCTCCTTTGGAACCGAGAGACCCCTCCGGTCTTGTC AACCTCTGTTTCGGCAGAGGATA  
CCGTGCTCCACAGCTGTAAGGCTGTGGGCCCGAGAGAAGTCGCTCTCTCGCCCTCCACATCCCTCT  
+  
FFFFFFF:FFFFFFFFFFFFFFFFFFFFFFFFFFFFFFFFFFFFFFFFFFFFFFFFFFFFFFFFFFFFFFFFF  
FFFFFFFFFFFFFFFFFFFFFFFFFFFFFFFFFFFFFFFFFFFFFFFFFFFFFFFFFFFFFFFFFFFFFFFF:  
@A00155:342:HHGFNDSXY:1:2273:5222:4899 2:N:0:GAACCTAG+TCCGCATA  
GTGAACAAGCCCGGAGTACATCTCCTTTGGAAGTAAAGGAGACCCCTCCGGTCTTGTC AACCTCTGTTT  
CGGCAGAGGATACCGTGCTCCACAGCTGTAAGGCTGTGGGCCCGAGAGAAGTCGCTCTCTCTCGCCCT





@A00155:342:HHGFNDSXY:1:2276:20148:33724 2:N:0:GAACCTAG+TCCGCATA  
 GGTCTGTAACAAGCCCGGAGTACATCTCCTTTGGAAGTACGAGACCCCTCCGGTCTTGTCCAACCTCT  
 GTTTCGGCAGAGGATACCGTGCTCCACAGCTGTAAGGCTGTGGGCCCGAGAGAAGTCGCTCTCTCTCG  
 +  
 FFFFFFFFFFFFFFFFFFFFFFFFFFFFFFFFFFFFFFFFFFFFFFFFFFFFFFFFFFFFFFFFFFFFFFFFFF  
 FFFFFFFFFFFFFFFFFFFFFFFFFFFFFFFFFFFFFFFFFFFFFFFFFFFFFFFFFFFFFFFFFFFFFFFFFF  
 @A00155:342:HHGFNDSXY:1:2277:25590:4038 2:N:0:GAACCTAG+TCCGCATA  
 AAAAGGACTCGTCAGGTAGCCTACTAGACTACGACTTACACGGTAGGTCGTGAACAAGCCCGGAGTAC  
 ATCTCCTTTGGAAGTACGAGACCCCTCCGGTCTTGTCCAACCTCTGTTTCGGCAGAGGATACCGTGCT  
 +  
 FFFFFFFFFFFFFFFFFFFFFFFFFFFFFFFFFFFFFFFFFFFFFFFFFFFFFFFFFFFFFFFFFFFFFFFFFF  
 FFFFFFFFFFFFFFFFFFFFFFFFFFFFFFFFFFFFFFFFFFFFFFFFFFFFFFFFFFFFFFFFFFFFFFFFFF  
 @A00155:342:HHGFNDSXY:1:2277:3468:10441 2:N:0:GAACCTAG+TCCGCATA  
 GTGAACAAGCCCGGAGTACATCTCCTTTGGAACAGGAGACCCCTCCGGTCTTGTCCAACCTCTGTTT  
 CGGCAGAGGATACCGTGCTCCACAGCTGTAAGGCTGTGGGCCCGAGAGAAGTCGCTCTCTCTCGCCCT  
 +  
 F:FFFFFF:FFFFFFFFFFFFFFFFFFFFFFFFFFFFFFFFFFFFFFFFFFFFFFFFFFFFFFFFFFFFFFF:FFFFFFFFF:FFFFFFF  
 FFFFFFFFFFFFFFFFFFFFFFFFFFFFFFFFFFFFFFFFFFFFFFFFFFFFFFFFFFFFFFFFFFFFFFFFFF  
 @A00155:342:HHGFNDSXY:1:2277:2889:14450 2:N:0:GAACCTAG+TCCGCATA  
 AGTACATCTCCTTTGGAAGTACGAGACCCCTCCGGTCTTGTCCAACCTCTGTTTCGGCAGAGGATAC  
 GTGCTCCACAGCTGTAAGGCTGTGGGCCCGAGAGAAGTCGCTCTCTCTCGCCCTCTACATCCCTCTCG  
 +  
 FFFFFFFFFFFFFFFFFFFFFFFFFFFFFFFFFFFFFFFFFFFFFFFFFFFFFFFFFFFFFFFFFFFFFFFFFF  
 FFFFFFFFFFFFFFFFFFFFFFFFFFFFFFFFFFFFFFFFFFFFFFFFFFFFFFFFFFFFFFFFFFFFFFFFFF  
 @A00155:342:HHGFNDSXY:1:2278:5556:4539 2:N:0:GAACCTAG+TCCGCATA  
 ACTAGGAGACCCCTCCGGTCTTGTCCAACCTCTGTTTCGGCAGAGGATACCGTGCTCCACAGCTGTAA  
 GGCTGTGGGCCCGAGAGAAGTCGCTCTCTCTCGCCCTCCACATCCCTCTCGGCATTGAGATGACCAT  
 +  
 FFFFFFFFFFFFFFFF,FFFFFF,FFFFFFFFFFFFFFFFFFFFFFFFFFFFFFFFFFFFFFFFFFFFFFFFF:  
 FFFFFFFFFF,F:FFFFFFFFFFFFFFFFFFFFFFFFFFFFFFFFFFFFFFFFFFFFFFFFFFFFFFFFFFFFF  
 @A00155:342:HHGFNDSXY:1:2278:27199:15718 2:N:0:GAACCTAG+TCCGCATA  
 TACTCTTCGAGTTGTGTAAGTTTCGTCCTAAAAAGGACTCGTCAGGTAGCCTACTAGACTACGACTTA  
 CACGGTAGGTCGTGAACAAGCCCGGAGTACATCTCCTTTGGAACAGGAGACCCCTCCGGTCTTGTCC  
 +  
 ,FFFF,FFFFFFFFFFFFFFFFFFFFFFFFFFFFFFFFFFFFFFFFFFFFFFFFFFFFFFFFFFFFFFFFF  
 FFFFFFFF:FFF:FFFFFF,FFFFFFFFFFFFFFFFFFFFFFFFFFFFFFFFFFFFFFFFFFFFFFFFFFFFF  
 @A00155:342:HHGFNDSXY:1:2278:15673:17613 2:N:0:GAACCTAG+TCCGCATA  
 GTTTCGTCCTAAAAAGGACTCGTCAGGTAGCCTACTAGACTACGACTTACACGGTAGGTCGTAAACAA  
 GCCCGGAGTACATCTCCTTTGGAAGTACGAGACCCCTCCGGTCTTGTCCAACCTCTGTTTCGGCAGAG  
 +  
 FFFFFFFFFFFFFFFFFFFFFFFFFFFFFFFFFFFFFFFFFFFFFFFFFFFFFFFFFFFFFFFFFFFFFFFFFF  
 :FFFFFFFFFFFFFFFFFFFFFFFFFFFFFFFFFFFFFFFFFFFFFFFFFFFFFFFFFFFFFFFFFFFFFFFFF  
 @A00155:342:HHGFNDSXY:1:2278:20500:22404 2:N:0:GAACCTAG+TCCGCATA  
 CGAGTTGTGTAAGTTTCGTCCTAAAAAGGACTCGTCAGGTAGCCTACTAGACTACGACTTACACGGTA  
 GGTCGTGAACAAGCCCGGAGTACATCTCCTTTGGAAGTACGAGACCCCTCCGGTCTTGTCCAACCTCT  
 +  
 FFFFFFFFFFFFFFFFFFFFFFFF:FFFF,FFFFFFFFFFFFFFFFFFFFFFFFFFFFFFFFFFFFFFFFF:  
 :F,FF,FFFF,FFFFFFFFF  
 FFFF:FFFFFF,FFFFFF:FFF::FFF,FFFFFFFFFFFF:FF:FF,FFFFFFFFFFFFFF:F,FF  
 @A00155:342:HHGFNDSXY:1:2301:28085:1689 2:N:0:GAACCTAG+TCCGCATA  
 TGTCCACTTAAGGACTCACCTCTGGCCTATGGTCATCTCAATGCCGAGAGGGATGTAGAGGGCGAGAG  
 AGAGCGACTTCTCTCGGGCCACAGCCTTACAGCTGTGGAGCACGGTATCCTCTGCCGAAACAGAGGT  
 +  
 FF:FFFFFFFF:FFFFFFFFFFFFFFFFFFFFFFFFFFFFFFFFFFFFFFFFFFFFFFFFFFFFFFFFF:FFFFFFF,FFFFFF:FFFFFFF  
 FFFFFFFFFF:FFFFFFFFFFFFFFFFFFFFFFFFFFFFFFFFFFFFFFFFFFFFFFFFFFFFFFFFFFFFF  
 @A00155:342:HHGFNDSXY:1:2278:20500:22404 2:N:0:GAACCTAG+TCCGCATA  
 CGAGTTGTGTAAGTTTCGTCCTAAAAAGGACTCGTCAGGTAGCCTACTAGACTACGACTTACACGGTA  
 GGTCGTGAACAAGCCCGGAGTACATCTCCTTTGGAAGTACGAGACCCCTCCGGTCTTGTCCAACCTCT

@A00155:342:HHGFNDSXY:1:2301:26910:15749 2:N:0:GAACCTAG+TCCGCATA  
ACTTACACGGTAGGTCTGTAACAAGCCCGGAGTACATCTCCTTTGGAACCAGGAGACCCCTCCGGTCT  
TGTCCAACCTCTGTTTCGGCAGAGGATACCGTGCTCCACAGCTGTAAGGCTGTGGGCCCGAGAGAAGT  
+  
FFFFFF:FFFFFF:FFFFFFFFFFFFFFFFFFFFFFFFFFFFFFFFFFFFFFFFFFFFFFFFFFFFFFFF  
FFFFFFFFFFFFFFFFFFFFFFFFFFFFFFFFFFFFFFFFFFFFFFFFFFFFFFFFFFFFFFFF:FFFFFFFFFFFFFFFF  
@A00155:342:HHGFNDSXY:1:2301:20374:25285 2:N:0:GAACCTAG+TCCGCATA  
GGGGGTTCAAACCCATGCCCCACCACACCGCCTTAGATCAGCTGTGTCCACTTAAGGACTCACCTCTG  
GCCTATGGTCATCTCAATGCCGAGAGGGATGTGGAGGGCGAGAGAGAGCGACTTCTCTCG  
+  
FFFFF,FFFF:FF,FFFFFFFFFFFFFFFFFFFFFFFF,FFFFFFFF:FFFFFFFF,FFFFFFFFFFFFFFFF  
F,FFF:FFFFFFFF,F,F:FFF:FFF,FFFF:FFF,FFFFFFFF:FFFFFF:FF  
@A00155:342:HHGFNDSXY:1:2301:32172:29684 2:N:0:GAACCTAG+TCCGCATA  
AGTTGTGTAAGTTTCGTCCTAAAAAGGACTCGTCAGGTAGCCTACTAGACTACGACTTACACGGTAGG  
TCGTGAACAAGCCCGGAGTACATCTCCTTTGGAAGTACGAGACCCCTCCGGTCTTGTCCAACCTCTGT  
+  
FFFFFFFFFFFFFFFFFFFFFFFF:FFFFFFFFFFFFFFFFFFFFFFFFFFFFFFFF:FFFFFFFFFFFFFFFF  
FFFFFFFF,FFFFFFFF:FFFFFFFF:FFFFFFFF:FFF:FFFFFFFF:FF:FF:FFFF  
@A00155:342:HHGFNDSXY:1:2302:16396:11099 2:N:0:GAACCTAG+TCCGCATA  
AGGACTCGTCAGGTAGCCTACTAGACTACGACTTACACGGTAGGTCGTGAACAAGCCCGGAGTACATC  
TCCTTTGGAACCAGGAGACCCCTCCGGTCTTGTCCAACCTCTGTTTCGGCAGAGGATACCGTGCTCCA  
+  
FFFFFFFFFFFFFFFFFFFFFFFFFFFFFFFFFFFFFFFFFFFFFFFFFFFFFFFFFFFFFFFF:FF  
FFFF:FFFF:FFFFFFFFFFFFFFFFFFFFFFFFFFFFFFFFFFFFFFFF:FFFFF:FFFFFFFFFFFF  
@A00155:342:HHGFNDSXY:1:2302:3115:13745 2:N:0:GAACCTAG+TCCGCATA  
GCCCACAGCCTTACAGCTGTGGAGCACGGTATCCTCTGCCGAAACAGAGGTTGGACAAGACCGGAGGG  
GTCTCCTAGTTCCAAAGGAGATGTACTCCGGGCTTGTTACGACCTACCGTGTAAGTCGTAGTCTAGT  
+  
FFFFFFFFFFFFFFFFFFFFFFFFFFFFFFFFFFFFFFFFFFFFFFFFFFFFFFFFFFFFFFFFFFFF  
FFFFFFFF,FFFFFFFFFFFFFFFFFFFFFFFFFFFFFFFFFFFFFFFFFFFFFFFFFFFFFFFFFFFF  
@A00155:342:HHGFNDSXY:1:2302:31159:29121 2:N:0:GAACCTAG+TCCGCATA  
AGTACATCTCCTTTGGAAGTACGAGACCCCTCCGGTCTTGTCCAACCTCTGTTTCGGCAGAGGATACC  
GTGCTCCACAGCTGTAAGGCTGTGGGCCCGAGAGAAGTCGCTCTCTCTCGCCCTCTACATCCC  
+  
FFFFFFFFFFFF,FFFF:FFFFFFFFFFFFFFFF:FFFFFFFFFFFFFFFFFFFFFFFF:FFF  
FFFFFFFFFFFFFFFFFFFFFFFFFFFFFFFFFFFFFFFFFFFFFFFFFFFFFFFFFFFFFFFFFFFF  
@A00155:342:HHGFNDSXY:1:2303:23719:1235 2:N:0:GAACCTAG+TCCGCATA  
GGACGAACTTACACAACCTCGAAGAGTAACGACGGTTTCGTCCTTGGAACGGACTCATCAGGGAGCCT  
ACTAGACTCCGACCGTCATGGGGGTTCAAACCCATGCCCCGCCACACCGCCTTAGATCAGCTGTGTCC  
+  
FFFFFFFFFFFFFFFFFFFFFFFFFFFFFFFFFFFFFFFFFFFFFFFFFFFFFFFFFFFFFFFFFFFF  
FFFFFFFFFFFFFFFFFFFFFFFFFFFFFFFFFFFFFFFFFFFFFFFFFFFFFFFFFFFFFFFFFFFF  
@A00155:342:HHGFNDSXY:1:2303:23502:1423 2:N:0:GAACCTAG+TCCGCATA  
GGACGAACTTACACAACCTCGAAGAGTAACGACGGTTTCGTCCTTGGAACGGACTCATCAGGGAGCCT  
ACTAGACTCCGACCGTCATGGGGGTTCAAACCCATGCCCCGCCACACCGCCTTAGATCAGCTGTGTCC  
+  
FFFFFFFFFFFFFFFFFFFFFFFFFFFFFFFFFFFFFFFFFFFFFFFFFFFFFFFFFFFFFFFFFFFF  
FFFFFFFFFFFFFFFFFFFFFFFFFFFFFFFFFFFFFFFFFFFFFFFFFFFFFFFFFFFFFFFFFFFF  
@A00155:342:HHGFNDSXY:1:2303:18448:6010 2:N:0:GAACCTAG+TCCGCATA  
CTCTTAGAGTTGTGTAAGTTTCGTCCTAAAAAGGACTCGTCAGGTAGCCTACTAGACTACGACTTACA  
CGGTAGGTCGTGAACAAGCCCGGAGTACATCTCCTTTGGAAGTACGAGACCCCTCCGGTCTTGTCCAA  
+  
FFFFFFFFFFFF,FFFFFFFF,F:FFFFFFFFFFFFFFFF,FFFFFFFFFFFFFFFF:FFFFFFFFFFFF  
F:FFFFFFFFFFFF:FFFFFFFFFFFFFFFF,,:FFFF,FFF,FFFF:F::F:::FFFF::FF::FF



[illegible]

@A00155:342:HHGFNDSXY:1:2308:9308:6214 2:N:0:GAACCTAG+TCCGCATA  
ACTAGACTACGACTTACACGGTAGGTTCGTGAACAAGCCCGGAGTACATCTCCTTTGGAAGTAGGAGAC  
CCCTCCGGTCTTGTC AACCTCTGTTTTCGGCAGAGGATACCGTGCTCCACAGCTGTAAGGCTGTGGGC  
+  
FFFF:FFFFFFFFFFFFFFFFFFFFFFFFFFFFFFFFFFFFFFFFFFFFFFFFFFFFFFFFFFFFFFF  
FFFFFFFFFFFFFFFFFFFFFFFFFFFFFFFFFFFFFFFFFFFFFFFFFFFFFFFFFFFFFFFF:F:  
@A00155:342:HHGFNDSXY:1:2308:28872:6527 2:N:0:GAACCTAG+TCCGCATA  
GAAGTAGGAGACCCCTCCGGTCTTGTC AACCTCTGTTTTCGGCAGAGGATACCGTGCTCCACAGCTGT  
AAGGCTGTGGGCCCGAGAGAAGTCGCTCTCTCTCGCCCTCCACATCCCTCTCGGCAGTGAGATGACCA  
+  
FFFFFFFFFFFFFFFFFFFFFFFFFFFFFFFFFFFFFFFFFFFFFFFFFFFFFFFFFFFFFFFF:F:  
FFFF:F:  
@A00155:342:HHGFNDSXY:1:2308:3839:7795 2:N:0:GAACCTAG+TCCGCATA  
GAAACCGTCGTTACTCTTCGAGTTGTGTAAGTTTCGTCCTAAAAGGACTCGTCAGGTAGCCTACTAG  
ACTACGACTTACACGGTAGGTCTGTGAACAAGCCCGGAGTACATCTCCTTTGGAAGTAGGAGACCCCTC  
+  
FFFFFF,F:,FFF,FF,FFFFF:F:,F:FFFFF:FFFFF  
FF,FFFFFFFFFFFFFFFFFFFFFFFF:F:,FFFF,:FFFF:FFFFF  
@A00155:342:HHGFNDSXY:1:2308:17065:34428 2:N:0:GAACCTAG+TCCGCATA  
GGACTCGTCAGGTAGCCTACTAGACTACGACTTACACGGTAGGTTCGTGAACAAGCCCGGAGTACATCT  
CCTTTGGAAGTAGGAGACCCCTCCGGTCTTGTC AACCTCTGTTTTCGGCAGAGGATACCGTGCTCCAC  
+  
FFFFFFFFFFFFFFFFFFFFFFFFFFFFFFFFFFFFFFFFFFFFFFFFFFFFFFFF:F:  
FF:FFFFF:FFFFFFFFFFFFFFFFFFFFFFFFFFFFFFFFFFFFFFFFFFFFFFFF:FFFFF  
@A00155:342:HHGFNDSXY:1:2308:30201:35258 2:N:0:GAACCTAG+TCCGCATA  
TAGGAGACCCCTCCGGTCTTGTC AACCTCTGTTTTCGGCAGAGGATACCGTGCTCCACAGCTGTAAGG  
CTGTGGGCCCGAGAGAAGTCGCTCTCTCTCGCCCTCCACATCCCTCTCGGCATTGAGATGAC  
+  
FFFFFFFFFFFFFFFFFFFFFFFFFFFFFFFFFFFFFFFFFFFFFFFFFFFFFFFF:FF  
F:FFFFFFFFFFFFFFFFFFFFFFFF:F:FFFFFFFFFFFFFFFFFFFFFFFF  
@A00155:342:HHGFNDSXY:1:2309:3115:4319 2:N:0:GAACCTAG+TCCGCATA  
CCTACTAGACTACGACTTACACGGTAGGTTCGTGAACAAGCCCGGAGTACATCTCCTTTGGAAGTAGGA  
GACCCCTCCGGTCTTGTC AACCTCTGTTTTCGGCAGAGGATACCGTGCTCCACAGCTGTAAGGCTGTG  
+  
FFFFFFFFFFFFFFFFFFFFFFFFFFFFFFFFFFFFFFFFFFFFFFFF:F:  
FFFFF:FFFFFFFFFFFFFFFFFFFFFFFFFFFFFFFFFFFFFFFFFFFFFFFFFFFFFFFF:FF  
@A00155:342:HHGFNDSXY:1:2309:11216:8891 2:N:0:GAACCTAG+TCCGCATA  
ACTTACACGGTAGGTTCGTGAACAAGCCCGGAGTACATCTCCTTTGGAAGTAGGAGACCCCTCCGGTCT  
TGTCCAACCTCTGTTTTCGGCAGAGGATACCGTGCTCCACAGCTGTAAGGCTGTGGGCCCGAGAGAAGT  
+  
FFFFFFFFFFFFFFFFFFFFFFFFFFFFFFFFFFFFFFFFFFFFFFFF:F:  
FFFFFFFFFFFFFFFFFFFFFFFFFFFFFFFFFFFFFFFFFFFFFFFFFFFFFFFF:FF  
@A00155:342:HHGFNDSXY:1:2309:11243:24533 2:N:0:GAACCTAG+TCCGCATA  
GGAGCCTACTAGACTCCGACCGTCATGGGGGTTCAAACCATGCCCGCCACACCGCCTTAGATCAGC  
TGTGTCCACTTAAGGACTCACCTCTGGCCTATGGTCATCTCAATGCCGAGAGGGATGTGGAGGG  
+  
FFFFFFFFFFF:F:FFFFFFFFFFFFFFFFFFFFFFFFFFFFFFFFFFFFFFFFFFFFFFFF,FFFF  
FFFFFFFFFFFFFFFFFFFFFFFFFFFFFFFFFFFFFFFFFFFFFFFFFFFFFFFFFFFFFFFF  
@A00155:342:HHGFNDSXY:1:2309:10827:33708 2:N:0:GAACCTAG+TCCGCATA  
GGACTCGTCAGGTAGCCTACTAGACTACGACTTACACGGTAGGTTCGTGAACAAGCCCGGAGTACATCT  
CCTTTGGAAGTAGGAGACCCCTCCGGTCTTGTC AACCTCTGTTTTCGGCAGAGGATACCGTGCTCCAC  
+  
FFFFFFF:F:FFFFFFFFFFFFFFFFFFFFFFFFFFFFFFFFFFFFFFFF:F:  
FFFFFFFFFFFFFFFFFFFFFFFFFFFFFFFFFFFFFFFFFFFFFFFFFFFFFFFF

@A00155:342:HHGFNDSXY:1:2310:29478:3630 2:N:0:GAACCTAG+TCCGCATA  
GGACTCGTCAGGTAGCCTACTAGACTACGACTTACACGGTAGGTCGTGAACAAGCCCCGGAGTACATCT  
CCTTTGGAAGTAGGAGACCCCCTCCGGTCTTGCCAACCTCTGTTTCGGCAGAGGATACCGTGCTCCAC  
+  
FFFFFFFFFFFFFFFFFFFFFFFFFFFFFFFFFFFFFFFFFFFFFFFFFFFFFFFFFFFFFFFFFFFFFFFFFFFFF  
FFFFFFFFFFFFFFFFFFFFFFFFFFFFFFFFFFFFFFFFFFFFFFFFFFFFFFFFFFFFFFFFFFFFFFFFFFFFF  
@A00155:342:HHGFNDSXY:1:2310:12364:11162 2:N:0:GAACCTAG+TCCGCATA  
ACCCCTCCGGTCTTGCCAACCTCTGTTTCGGCAGAGGATACCGTGCTCCACAGCTGTAAGGCTGTGG  
GCCCGAGAGAAGTCGCTCTCTCTCGCCCTCACATCCCTCTCGGCATTGAGATGACCATAGGCCAGAG  
+  
FFFFFFFFFFFFFFFFFFFFFFFFFFFFFFFFFFFFFFFFFFFFFFFFFFFFFFFFFFFFFFFFFFFFFFFFFFFFF  
FFFFFFFFFFFFFF:F:FFFFFFFFFFFFFFFFFFFFFFFFFFFFFFFFFFFFFFFFFFFFFFFFFFFFFFFFFFFFF  
@A00155:342:HHGFNDSXY:1:2310:20039:15092 2:N:0:GAACCTAG+TCCGCATA  
TGTC AACCTCTGTTTCGGCAGAGGATACCGTGCTCCACAGCTGTAAGGCTGTGGGCCCCGAGAGAAGT  
CGCTCTCTCTCGCCCTCCACATCCCTCTCGGCATTGAGAAGACCATAGGCCAGAGGTGAGTCCTTAAG  
+  
FFFFFFFFFFFFFFFFFFFFFFFFFFFFFFFFFFFFFFFFFFFFFFFFFFFFFFFFFFFFFFFFFFFFFFFFFFFFF  
FFFFFFFFFFFFFFFFFFFFFFFFFFFFFFFFFFFFFFFFFFFFFFFFFFFFFFFFFFFFFFFFFFFFFFFFFFFFF  
@A00155:342:HHGFNDSXY:1:2310:21630:27305 2:N:0:GAACCTAG+TCCGCATA  
CTTTTTAGGACGAACTTACACA ACTCGAAGAGTAACGACGGTTTCGTCCTTGGAACGGACTCATCAG  
GGAGCCTACTAGACTCCGACCGTCATGGGGGTTCAAACCCATGCCCCACCACACCGCCTTAGATCAGC  
+  
FFF:FFFFFFFFFFFFFFFFFFFFFFFFFFFFFFFFFFFFFFFFFFFFFFFFFFFFFFFFFFFFFFFFFFFFF  
FFFFFFFFFFFFFFFFFFFFFFFFFFFFFFFFFFFFFFFFFFFFFFFFFFFFFFFFFFFFFFFFFFFFFFFFFFFFF  
@A00155:342:HHGFNDSXY:1:2311:15709:15984 2:N:0:GAACCTAG+TCCGCATA  
AAGGACGAAACCGTCGTTACTCTTCGAGTTGTGTAAGTTTCGTCCTAAAAAGGACTCGTCAGGTAGCC  
TACTAGACTACGACTTACACGGTAGGTCGTGAACAAGCCCGAGTACATCTCCTTTGGAAGTAGGAGA  
+  
FFFFFFFFFFFFFFFFFFFFFFFFFFFFFFFFFFFFFFFFFFFFFFFFFFFFFFFFFFFFFFFFFFFFFFFFFFFFF  
FFFFFFFFFFFFFFFFFFFFFFFFFFFFFFFFFFFFFFFFFFFFFFFFFFFFFFFFFFFFFFFFFFFFFFFFFFFFF  
@A00155:342:HHGFNDSXY:1:2311:22742:21652 2:N:0:GAACCTAG+TCCGCATA  
TAGACTACGACTTACACGGTAGGTCGTGAACAAGCCCGGAGTACATCTCCTTTGGAACCAGGAGACCC  
CTCCGGTCTTGTC AACCTCTGTTTCGGCAGAGGATACCGTGCTCCACAGCTGTAAGGCTGTGGGCC  
+  
FFFFFFFFFFFFFFFFFFFFFFFFFFFFFFFFFFFFFFFFFFFFFFFFFFFFFFFFFFFFFFFFFFFFFFFFFFFFF  
FFFFFFFFFFFFFFFFFFFFFFFFFFFFFFFFFFFFFFFFFFFFFFFFFFFFFFFFFFFFFFFFFFFFFFFFFFFFF  
@A00155:342:HHGFNDSXY:1:2311:25771:25770 2:N:0:GAACCTAG+TCCGCATA  
TCCTAAAAAGGACTCGTCAGGTAGCCTACTAGACTACGACTTACACGGTAGGTCGTGAACAAGCCCGG  
AGTACATCTCCTTTGGAAGTAGGAGACCCCCTCCGGTCTTGTC AACCTCTGTTTCGGCAGAGGATACC  
+  
FFFFFFFFFFFFFFFFFFFFFFFFFFFFFFFFFFFFFFFFFFFFFFFFFFFFFFFFFFFFFFFFFFFFFFFFFFFFF  
FFFFFFFFFFFFFFFFFFFFFFFFFFFFFFFFFFFFFFFFFFFFFFFFFFFFFFFFFFFFFFFFFFFFFFFFFFFFF  
@A00155:342:HHGFNDSXY:1:2311:12093:31986 2:N:0:GAACCTAG+TCCGCATA  
TACATCTCCTTTGGAAGTAGGAGACCCCCTCCGGTCTTGTC AACCTCTGTTTCGGCAGAGGATACCGT  
GCTCCACAGCTGTAAGGCTGTGGGCCCGAGAGAAGTCGCTCTCTCTCGCCCTCCACATCCCTCTCGGC  
+  
FFFFFFFFFFFFFFFFFFFFFFFFFFFFFFFFFFFFFFFFFFFFFFFFFFFFFFFFFFFFFFFFFFFFFFFFFFFFF  
FFFFFFFFFFFFFFFFFFFFFFFFFFFFFFFFFFFFFFFFFFFFFFFFFFFFFFFFFFFFFFFFFFFFFFFFFFFFF  
@A00155:342:HHGFNDSXY:1:2311:8938:32753 2:N:0:GAACCTAG+TCCGCATA  
CTTTTTAGGACGAACTTACACA ACTCAAAGAGTAACGACGGTTTCGTCCTTGGAACGGACTCATCAG  
GGAGCCTACTAGACTCCGACCGTCATGGGGGTTCAAACCCATGCCCCGCCACACCGCCTTAGATCAGC  
+

@A00155:342:HHGFNDSXY:1:2312:26313:12179 2:N:0:GAACCTAG+TCCGCATA  
GAGACCCCTCCGGTCTTGTCCAACCTCTGTTTCGGCAGAGGATACCGTGCTCCACAGCTGTAAGGCTG  
TGGGCCCCGAGAGAAGTCGCTCTCTCTCGCCCTCCACATCCCTCTCGGCATTGAGATGAC

+

FFFFFFFFFFFFFFFF:FFFFFFFFFFFFFFFF:FFFFFFFFFFFFFFFFFFFFFFFFFFFFFFFFFFFFFFFF  
FFFFFFFFFF,FF,FFFF:FFFFFFFFFFFFFFFFFFFFFFFFFFFFFFFFFFFFFFFF:FFFFFFFFFF

@A00155:342:HHGFNDSXY:1:2314:5141:17096 2:N:0:GAACCTAG+TCCGCATA  
GGTAGCCTACTAGACTACGACTTACACGGTAGGTCGTGAACAAGCCCGAGTACATCTCCTTTGGAAC  
TAGGAGACCCCTCCGGTCTTGTCCAACCTCTGTTTCGGCAGAGGATACCGTGCTCCACAGCTGTAAGG

+

FFFFFFFFFFFFFFFFFFFFFFFFFFFFFFFFFFFFFFFF:FFFFFFF,FFFFFF:FFFFFFFFFFFFFFFF  
FF,FFFFFFFFFFFFFFFF:FFFFFFFFFFFFFFFFFFFFFFFF:FFFFFFF:FFFFFF:FFFFFFFFFFFFFFFF:FFFFF

@A00155:342:HHGFNDSXY:1:2314:4182:22263 2:N:0:GAACCTAG+TCCGCATA  
GGACTCACCTCTGGCCTATGGTCATCTCAATGCCGAGAGGGATGTGAAGGGCGAGAGAGAGCGACTTC  
TCTCGGGCCCACAGCCTTACAGCTGTGGAGCACGGTATCCTCTGCCGAAACAGAGGTTGGACAAGACC

+

FFFFFFFFFFFFFFFFFFFFFFFFFFFFFFFFFFFFFFFF:FFFFFFFFFFFFFFFFFFFFFFFFFFFFFFFF,FFFFFFFF  
FFFFFFFFFFFFFFFFFFFFFFFFFFFFFFFFFFFFFFFFFFFFFFFFFFFFFFFFFFFFFFFFFFFFFFFFFFFFFFFF

@A00155:342:HHGFNDSXY:1:2314:6117:30217 2:N:0:GAACCTAG+TCCGCATA  
CTACTAGACTACGACTTACACGGTAGGTCGTGAACAAGCCCGAGTACATCTCCTTTGGAAGTACTAGGAG  
ACCCCTCCGGTCTTGTCCAACCTCTGTTTCGGCAGAGGATACCGTGCTCCACAGCTGTAAGGCTGTGG

+

FFFFFFFFFFFFFFFFFFFFFFFFFFFFFFFFFFFFFFFFFFFFFFFFFFFFFFFFFFFFFFFFFFFFFFFF:FFFFFFFFFFFF  
FFFFF:FFFFFFFFFFFFFFFFFFFFFFFFFFFFFFFFFFFFFFFF:FFFFFFFFFFFFFFFFFFFFFFFFFFFFFFFF

@A00155:342:HHGFNDSXY:1:2314:15772:32315 2:N:0:GAACCTAG+TCCGCATA  
ACGAAACCGTCGTTACTCTTCGAGTTGTGTAAGTTTCGTCCTAAAAAGGACTCGTCAGGTAGCCTACT  
AGACTACGACTTACACGGTAGGTCGTGAACAAGCCCGAGTACATCTCCTTTGGAAGTACTAGGAGACCCC

+

FFFFFFFFFFFFFFFFFFFFFFFFFFFFFFFFFFFFFFFFFFFFFFFFFFFFFFFFFFFFFFFFFFFFFFFF  
FFFFFFFFFFFFFFFFFFFFFFFFFFFFFFFFFFFFFFFFFFFFFFFFFFFFFFFFFFFFFFFFFFFFFFFF

@A00155:342:HHGFNDSXY:1:2315:28999:21465 2:N:0:GAACCTAG+TCCGCATA  
CGAGTTGTGTAAGTTTCGTCCTAAAAAGGACTCGTCAGGTAGCCTACTAGACTACGACTTACACGGTA  
GGTCGTGAACAAGCCCGAGTACATCTCCTTTGGAAGTACTAGGAGACCCCTCCGGTCTTGTCCAACCTCT

+

:FFFFFFFFFFFF:FFF:FF,FFFFFF,FFF:FFFFFFFFFFFFFFFF:,F,F::F:FFF,FFFF:FFF  
:FFFFFFFF,FF,FFF,FFFFFF:,::,F,:FFFF:,F,FF:F:FFF,FF:FFFFFFFFFFFF:F,::

@A00155:342:HHGFNDSXY:1:2315:10700:24752 2:N:0:GAACCTAG+TCCGCATA  
TGGAAGTACTAGGAGACCCCTCCGGTCTTGTCCAACCTCTGTTTCGGCAGAGGATACCGTGCTCCACAGCT  
GTAAGGCTGTGGGCCCCGAGAGAAGTCGCTCTCTCTCGCCCTCCACATCCCTCTCGGCATTGAGATGAC

+

FFFFFFFFFFFF:FFFFFFFFFFFFFFFFFFFFFFFFFFFFFFFF:FFFFFFFFFFFFFFFFFFFFFFFFFFFF  
FFFFFFFFFFFFFFFFFFFF:FFFFFFFFFFFFFFFFFFFFFFFFFFFFFFFFFFFFFFFFFFFFFFFFFFFF:F

@A00155:342:HHGFNDSXY:1:2315:16685:28761 2:N:0:GAACCTAG+TCCGCATA  
GTACATCTCCTTTGGAAGTACTAGGAGACCCCTCCGGTCTTGTCCAACCTCTGTTTCGGCAGAGGATACCG  
TGCTCCACAGCTGTAAGGCTGTGGGCCCCGAGAGAAGTCGCTCTCTCTCGCCCTCCACATCCCTCTCGG

+

FFFFFFFFFFFFFFFFFFFFFFFFFFFFFFFFFFFFFFFF,FFFFFFFFFFFFFFFFFFFFFFFF:FF:FFFF  
FFFFFFFFFFFFFFFFFFFFFFFFFFFFFFFFFFFFFFFF,F:FFFFFFFFFFFFFFFF:FFFFFFFFFF

@A00155:342:HHGFNDSXY:1:2315:25753:31532 2:N:0:GAACCTAG+TCCGCATA  
CTTGTCCAACCTCTGTTTCGGCAGAGGATACCGTGCTCCACAGCTGTAAGGCTGTGGGCCCCGAGAGAA  
GTCGCTCTCTCTCGCCCTCTACATCCCTCTCGGCATTGAGATGACCATAGGCCAGAGGTGAGTCCTTA

+

FFFFFF:FFFF:::FFFF:FFFF:FFF::FFFFFFFFFFFFFFFF,FFF:FFFFFFFFFFFF:FFFFF  
F,FFFFFFFFFFFFFFFF:F:FFFF,FFFFFF:F:FF:, ,FFF:F:FF,F:FFF,F:FFFFFFFFFFFF,F



@A00155:342:HHGFNDSXY:1:2316:2293:4648 2:N:0:GAACCTAG+TCCGCATA  
ACTTACACGGTAGGTCGTGAACAAGCCCGGAGTACATCTCCTTTGGAAGTACGAGACCCCCTCCGGTCT  
TGTCCAACCTATGTTTTCGGCAGAGGATACCGTGCTCCACAGCTGTAAGGCTGTGGGCCCGAGAGAAGT  
+  
:FFFFFFFFFFFFFFFFFFFFFFFFFFFFFFFFFFFFFFFFFFFFFFFFFFFFFFFFFFFFFFFFFFFFF:FFFFFF:FFFFF  
FFFF,FFFFFFFFFFFFFFFF:FFFFFFFFFFFFFFFFFFFFFFFFFFFFFFFFFFFFFFFFFFFFFFFF:FFFFFFFFFFFFFFFF  
@A00155:342:HHGFNDSXY:1:2316:9263:22576 2:N:0:GAACCTAG+TCCGCATA  
ACGGTAGGTCGTGAACAAGCCCGGAGTACATCTCCTTTGGAAGTACGAGACCCCCTCCGGTCTTGTCCA  
ACCTCTGTTTTCGGCAGAGGATACCGTGCTCCACAGCTGTAAGGCTGTGGGCCCGAGAGAAGTCTGCTCT  
+  
FFFFFFFFFFFFFFFFFFFFFFFFFFFFFFFFFFFFFFFFFFFFFFFFFFFFFFFFFFFFFFFFFFFFF,FFFFFFFFFFFFFFFFFFFFFFFF  
FFFFFFFFFFFFFFFFFFFFFFFF:FFFFFFFFFFFFFFFFFFFFFFFFFFFFFFFFFFFFFFFFFFFFFFFFFFFFFFFFFFFFFFFF  
@A00155:342:HHGFNDSXY:1:2317:14931:4429 2:N:0:GAACCTAG+TCCGCATA  
TTTCGTCCTAAAAAGGACTCGTCAGGTAGCCTACTAGACTACGACTTACACGGTAGGTCGTGAACAAG  
CCCGGAGTACATCTCCTTTGGAAGTACGAGACCCCCTCCGGTCTTGTCCAACCTCTGTTTCGGCAGAGG  
+  
F:F:FFFFFFFFFFFFFFFFFFFFFFFFFFFFFFFFFFFFFFFFFFFFFFFFFFFFFFFFFFFFFFFFFFFFF  
FFFFFFFFFFFFFFFFFFFFFFFFFFFFFFFFFFFFFFFFFFFFFFFFFFFFFFFFFFFFFFFFFFFFF:FFFFFFFFFFFFFFFF  
@A00155:342:HHGFNDSXY:1:2317:30906:33160 2:N:0:GAACCTAG+TCCGCATA  
ACTCTTGAGTTGTGTAAGTTTCGTCCTAAAAAGGACTCGTCAGGTAGCCTACTAGACTACGACTTAC  
ACGGTAGGTCGTGAACAAGCCCGGAGTACATCTCCTTTGGAAGTACGAGACCCCCTCCGGTCTTGTCCA  
+  
FFFF,FFFFFFFFFFFF,FF::FFFFFFFFFFFFFFFFFFFFFFFFFFFFFFFFFFFFFFFFFFFFFFFFFFFFFFFFFFFFF  
FFFFFFFFFFFFFFFFFFFFFFFFFFFFFFFFFFFFFFFFFFFFFFFFFFFFFFFFFFFFFFFFFFFFF:FFFFFF:FFFFFF:FFF:FFFFFFFF  
@A00155:342:HHGFNDSXY:1:2318:6027:7357 2:N:0:GAACCTAG+TCCGCATA  
GGTCTTGTCCAACCTCTGTTTCGGCAGAGGATACCGTGCTCCACAGCTGTAAGGCTGTGGGCCCGAGA  
GAAGTCGCTCTCTCTCGCCCTTACATCCCTCTCGGCATTGAGATGACCATAGGCCAGAG  
+  
FFFFFFFFFFFFFFFFFFFFFFFFFFFFFFFFFFFFFFFFFFFFFFFFFFFFFFFFFFFFFFFFFFFFF  
FFFFFFFFFFFFFFFFFFFFFFFFFFFFFFFFFFFFFFFFFFFFFFFFFFFFFFFFFFFFFFFFFFFFF  
@A00155:342:HHGFNDSXY:1:2318:6470:7654 2:N:0:GAACCTAG+TCCGCATA  
GGTCTTGTCCAACCTCTGTTTCGGCAGAGGATACCGTGCTCCACAGCTGTAAGGCTGTGGGCCCGAGA  
GAAGTCGCTCTCTCTCGCCCTTACATCCCTCTCGGCATTGAGATGACCATAGGCCAGAG  
+  
FFF:FFFFFFFFFFFFFFFFFFFFFFFFFFFFFFFFFFFFFFFFFFFFFFFFFFFFFFFFFFFFFFFFFFFFF  
FF:FFFFFF:FFFFFFFFFFFFFFFFFFFFFFFFFFFFFFFFFFFFFFFFFFFFFFFFFFFFFFFFFFFFF,FFFFFFFFFFFF,F:FFFF:FFF  
@A00155:342:HHGFNDSXY:1:2319:12274:4679 2:N:0:GAACCTAG+TCCGCATA  
GGACTCGTCAGGTAGCCTACTAGACTACGACTTACACGGTAGGTCGTGAACAAGCCCGGAGTACATCT  
CCTTTGGAAGTACGAGACCCCCTCCGGTCTTGTCCAACCTCTGTTTCGGCAGAGGATACCGTGCTCCAC  
+  
FFFFFFFFFFFFFFFFFFFFFFFFFFFFFFFFFFFFFFFFFFFFFFFFFFFFFFFFFFFFFFFFFFFFF  
FFFFFFFF:FFFFFFFFFFFFFFFFFFFFFFFFFFFFFFFFFFFFFFFFFFFFFFFFFFFFFFFFFFFFFFFFFFFFF  
@A00155:342:HHGFNDSXY:1:2319:9616:19179 2:N:0:GAACCTAG+TCCGCATA  
GGACTCGTCAGGTAGCCTACTAGACTACGACTTACACGGTAGGTCGTGAACAAGCCCGGAGTACATCT  
CCTTTGGAAGTACGAGACCCCCTCCGGTCTTGTCCAACCTCTGTTTCGGCAGAGGATACCGTGCTCCAT  
+  
FFFFFFFFFFFFFFFFFFFFFFFFFFFFFFFFFFFFFFFFFFFFFFFFFFFFFFFFFFFFFFFFFFFFF:FFFFFFFFFFFFFFFF  
FFFFFFFFFFFFFFFFFFFFFFFFFFFFFFFFFFFFFFFFFFFFFFFFFFFFFFFFFFFFFFFFFFFFF:FFFFFFFFFFFFFFFF  
@A00155:342:HHGFNDSXY:1:2319:31647:36010 2:N:0:GAACCTAG+TCCGCATA  
TCCAAGGACGAAACCGTCGTTACTCTACGAGTTGTGTAAGTTTCGTCCTAAAAAGGACTCGTCAGGTA  
GCCTACTAGACTACGACTTACACGGTAGGTCGTGAACAAGCCCGGAGTACATCTCCTTTGGAAGTACG  
+  
FFFFFFFFFFFFFFFFFFFF:FFFFF:F:FF:FFFFFFFF:FFFFFFFFFFFFF::FF,:FFFFFFFF:FFFF:FFFF,  
FFFFFFFF:F::F:FFFF:FFFFFFFFFFFFFFFFFFFF:FFFFFFFFFFFFFFFFFFFFFFFFFFFFFFFF:FFFFFFFF

@A00155:342:HHGFNDSXY:1:2320:20591:18646 2:N:0:GAACCTAG+TCCGCATA  
TTTGTGTAAGTTTCGTCTCTAAAAAGGACTCGTCAGGTAGCCTACTAGACTACGACTTACACGGTAGGT  
CGTGAACAAGCCCCGGAGTACATCTCCTTTGGAAGTAGGAGACCCCTCCGGTCTTGTCACACCTCTGTT  
+  
FF:FFFFFFFFFFFFFFFFFFFFFFFFFFFFFFFFFFFFFFFFFFFFFFFFFFFFFFFFFFFFFFFFFFFFFFFFF  
FFFFFFFFFFFFFFFFFFFFFFFFFFFFFFFFFFFFFFFFFFFFFFFFFFFFFFFFFFFFFFFFFFFFFFFFF:FFFFFFF  
@A00155:342:HHGFNDSXY:1:2320:32750:26334 2:N:0:GAACCTAG+TCCGCATA  
ACCCCTCCGGTCTTGTCACACCTCTGTTTCGGCAGAGGATACCGTGCTCCACAGCTGTAAAGCTGTGG  
GCCCGAGAGAAGTCGCTCTCTCTCGCCCTCCACATCCCTCTCGGCATTGAGATGACCATAGG  
+  
FFFFFFFFFFFFFFFFFFFFFFFFFFFFFFFFFFFFFFFFFFFFFFFFFFFFFFFFFFFFFFFFFFFFFFFFF  
FFFFFFFFFFFFFFFFFFFFFFFFFFFFFFFFFFFFFFFFFFFFFFFFFFFFFFFFFFFFFFFFFFFFF:FFFFFFFFF  
@A00155:342:HHGFNDSXY:1:2320:31828:27806 2:N:0:GAACCTAG+TCCGCATA  
ACCCCTCCGGTCTTGTCACACCTCTGTTTCGGCAGAGGATACCGTGCTCCACAGCTGTAAAGCTGTGG  
GCCCGAGAGAAGTCGCTCTCTCTCGCCCTCCACATCCCTCTCGGCATTGAGATGACCATAGG  
+  
FFFFFFFFFFFFFFFFFFFFFFFFFFFFFFFFFFFFFFFFFFFFFFFFFFFFFFFFFFFFFFFFFFFFFFFFF,  
FFFFFFFFFFFFFFFFFFFFFFFFFFFFFFFFFFFFFFFFFFFFFFFFFFFFFFFFFFFFFFFFFFFFF,FF  
@A00155:342:HHGFNDSXY:1:2321:15121:5541 2:N:0:GAACCTAG+TCCGCATA  
ACTTACACGGTAGGTCTGTAACAAGCCCCGGAGTACATCTCCTTTGGAAGTAGGAGACCCCTCCGGTCT  
TGTCACACCTCTGTTTCGGCAGAGGATACCGTGCTCCACAGCTGTAAGGCTGTGGGCCCGAGAGAAGT  
+  
FFFFFFFFFFFFFFFFFFFFFFFFFFFFFFFFFFFFFFFFFFFFFFFFFFFFFFFFFFFFFFFFFFFFFFFFF:  
FFFFFFFFFFFFFFFFFFFFFFFFFFFFFFFFFFFFFFFFFFFFFFFFFFFFFFFFFFFFFFFFFFFFF:  
@A00155:342:HHGFNDSXY:1:2321:25717:14152 2:N:0:GAACCTAG+TCCGCATA  
GGTCTTGTCACACCTCTGTTTCGGCAGAGGATACCGTGCTCCACAGCTGTAAGGCTGTGGGCCCGAGA  
GAAGTCGCTCTCTCTCGCCCTCCACATCCCTCTCGGCATTGAGATGACCATAGGCCAGAGGAGAGTCC  
+  
FFFFFFFFFFFFFFFFFFFFFFFFFFFFFFFFFFFFFFFFFFFFFFFFFFFFFFFFFFFFFFFFFFFFFFFFF:  
FFFFFFFFFFFFFFFFFFFFFFFFFFFFFFFFFFFFFFFFFFFFFFFFFFFFFFFFFFFFFFFFFFFFF:  
@A00155:342:HHGFNDSXY:1:2321:4933:25723 2:N:0:GAACCTAG+TCCGCATA  
GGACTCGTCAGGTAGCCTACTAGACTACGACTTACACGGTAGGTCTGTAACAAGCCCCGGAGTACATCT  
CCTTTGGAAGTAGGAGACCCCTCCGGTCTTGTCACACCTCTGTTTCGGCAGAGGCTACCGTGCTCCAC  
+  
FFFFFFFFFFFFFFFFFFFFFFFFFFFFFFFFFFFFFFFFFFFFFFFFFFFFFFFFFFFFFFFFFFFFFFFFF:  
FF:FFFFFFFFFFFFFFFFFFFFFFFFFFFFFFFFFFFFFFFFFFFFFFFFFFFFFFFFFFFFFFFFFFFFF,  
@A00155:342:HHGFNDSXY:1:2322:11595:13463 2:N:0:GAACCTAG+TCCGCATA  
CGCCCTCCACATCCCTCTCGGCATTGAGATGACCATAGGCCAGAGGTGAGTCCTTAAGTGGACACAGC  
TGATCTAAGGCGGTGTGGTGGGGCATGGGTTTGAACCCCATGACGGTCGAGTCTAGTAGGCTCCCT  
+  
FFFFFFFFFFFFFFFFFFFFFFFFFFFFFFFFFFFFFFFFFFFFFFFFFFFFFFFFFFFFFFFFFFFFFFFFF  
FFFFFFFFFFFFFFFFFFFFFFFFFFFFFFFFFFFFFFFFFFFFFFFFFFFFFFFFFFFFFFFFFFFFF:  
@A00155:342:HHGFNDSXY:1:2322:21106:18787 2:N:0:GAACCTAG+TCCGCATA  
GTTTCGTCTCTAAAAAGGACTCGTCAGGTAGCCTACTAGACTACGACTTACACGGTAGGTCTGTAACAA  
GCCCGAGTACATCTCCTTTGGAAGTAGGAGACCCCTCCGGTCTTGTCACACCTCTGTTTCGGCAGAG  
+  
FFFFFFFFFFFFFFFFFFFFFFFFFFFFFFFFFFFFFFFFFFFFFFFFFFFFFFFFFFFFFFFFFFFFFFFFF:  
FFFFFFFFFFFFFFFFFFFFFFFFFFFFFFFFFFFFFFFFFFFFFFFFFFFFFFFFFFFFFFFFFFFFF:  
@A00155:342:HHGFNDSXY:1:2322:25608:24643 2:N:0:GAACCTAG+TCCGCATA  
TAGACTACGACTTACACGGTAGGTCTGTAACAAGCCCCGGAGTACATCTCCTTTGGAACCAGGAGACCC  
CTCCGGTCTTGTCACACCTCTGTTTCGGCAGAGGATACCGTGCTCCACAGCTGTAAGGCTGTGGGCC  
+  
FFFFFFFFFFFFFFFFFFFFFFFFFFFFFFFFFFFFFFFFFFFFFFFFFFFFFFFFFFFFFFFFFFFFFFFFF:  
FFFFFFFFFFFFFFFFFFFFFFFFFFFFFFFFFFFFFFFFFFFFFFFFFFFFFFFFFFFFFFFFFFFFF:  
@A00155:342:HHGFNDSXY:1:2322:25608:24643 2:N:0:GAACCTAG+TCCGCATA  
TAGACTACGACTTACACGGTAGGTCTGTAACAAGCCCCGGAGTACATCTCCTTTGGAACCAGGAGACCC  
CTCCGGTCTTGTCACACCTCTGTTTCGGCAGAGGATACCGTGCTCCACAGCTGTAAGGCTGTGGGCC

[illegible]

@A00155:342:HHGFNDSXY:1:2325:20130:5290 2:N:0:GAACCTAG+TCCGCATA  
GGACTCGTCAGGTAGCCTACTAGACTACGACTTACACGGTAGGTCGTGAACAAGCCCGGAGTACATCT  
CCTTTGGAAGTACAGGAGACCCCTCCGGTCTTGTCCAACCTCTGTTTCGGCAGAGGATACCGTGCTCCAC  
+  
FFFFFFFFFFFFFFFFFFFFFFFFFFFFFFFFFFFFFFFFFFFFFFFFFFFFFFFFFFFFFFFFFFFFFFFFFFFF  
FFFFFFFF:FFFFFFFF:F:FFFFFFFF:FFFFFFFFFFFFFFFFFFFFFFFFFFFFFFFFFFFFFFFFFFFF  
@A00155:342:HHGFNDSXY:1:2325:19388:7733 2:N:0:GAACCTAG+TCCGCATA  
AGCCCGGAGTACATCTCCTTTGGAAGTACAGGAGACCCCTCCGGTCTTGTCCAACCTCTGTTTCGGCAGA  
GGATACCGTGCTCCACAGCTGTAAGGCTGTGGGCCCGAGAGAAGTCGCTCTCTCTCGCCCTC  
+  
FFFFFFFFFFFFFFFFFFFFFFFFFFFFFFFFFFFFFFFFFFFFFFFFFFFFFFFFFFFFFFFFFFFFFFFFFFFF  
FFFFFFFFFFFFFFFFFFFFFFFFFFFFFFFFFFFFFFFFFFFFFFFFFFFFFFFFFFFFFFFFFFFFFFFFFFFF  
@A00155:342:HHGFNDSXY:1:2325:11514:11068 2:N:0:GAACCTAG+TCCGCATA  
TAGACTACGACTTACACGGTAGGTCGTGAACAAGCCCGGAGTACATCTCCTTTGGAAGTACAGGAGACCC  
CTCCGGTCTTGTCCAACCTCTGTTTCGGCAGAGGATACCGTGCTCCACAGCTGTAAGGCTGTGGGCC  
+  
FFFFFFFFFFFFFFFFFFFFFFFFFFFFFFFFFFFFFFFFFFFFFFFFFFFFFFFFFFFFFFFFFFFFFFFFFFFF  
FFFFFFFFFFFFFFFFFFFFFFFFFFFFFFFFFFFFFFFFFFFFFFFFFFFFFFFFFFFFFFFFFFFFFFFFFFFF  
@A00155:342:HHGFNDSXY:1:2325:23285:11256 2:N:0:GAACCTAG+TCCGCATA  
TACGACTTACACGGTAGGTCGTGAACAAGCCCGGAGTACATCTCCTTTGGAAGTACAGGAGACCCCTCCG  
GTCTTGTCCAACCTCTGTTTCGGCAGAGGATACCGTGCTCCACAGCTGTAAGGCTGTGGGCCG  
+  
FFFFFFFFFFFFFFFFFFFFFFFFFFFFFFFFFFFFFFFFFFFFFFFFFFFFFFFFFFFFFFFFFFFFFFFFFFFF  
FFFFFFFFFFFFFFFFFFFFFFFFFFFFFFFFFFFFFFFFFFFFFFFFFFFFFFFFFFFFFFFFFFFFFFFFFFFF  
@A00155:342:HHGFNDSXY:1:2325:24053:15374 2:N:0:GAACCTAG+TCCGCATA  
TGGGTTTGAACCCCATGACGGTCGGAGTCTAGTAGGCTCCCTGATGAGTCCGTTCCAAGGACGAAAC  
CGTCGTTACTCTTCGAGTTGTGTAAGTTTCGTCCTAAAAAGGACTCGTCAGGTAGCCTACTAGACTAC  
+  
FFFFFFFFFFFFFFFFFFFFFFFFFFFFFFFFFFFFFFFFFFFFFFFFFFFFFFFFFFFFFFFFFFFFFFFFFFFF  
FFFFFFFFFFFFFFFFFFFFFFFFFFFFFFFFFFFFFFFFFFFFFFFFFFFFFFFFFFFFFFFFFFFFFFFFFFFF  
@A00155:342:HHGFNDSXY:1:2325:29062:19132 2:N:0:GAACCTAG+TCCGCATA  
GAAACCGTCGTTACTCTTCGAGTTGTGTAAGTTTCGTCCTAAAAAGGACTCGTCAGGTAGCCTACTAG  
ACTACGACTTACACGGTAGGTCGTGAACAAGCCCGGAGTACATCTCCTTTGGAAGTACAGGAGACCCCTC  
+  
FFFFFFFFFFFFFFFFFFFFFFFFFFFFFFFFFFFFFFFFFFFFFFFFFFFFFFFFFFFFFFFFFFFFFFFFFFFF  
FFFFFFFFFFFFFFFFFFFFFFFFFFFFFFFFFFFFFFFFFFFFFFFFFFFFFFFFFFFFFFFFFFFFFFFFFFFF  
@A00155:342:HHGFNDSXY:1:2326:22182:10285 2:N:0:GAACCTAG+TCCGCATA  
GGAGTACATCTCCTTTGGAAGTACAGGAGACCCCTCCGGTCTTGTCCAACCTCTGTTTCGGCAGAGGATA  
CCGTGCTCCACAGCTGTAAGGCTGTGGGCCCGAGAGAAGTCGCTCTCTCTCGCCCTCCACATCCC  
+  
FFFFFFFFFFFFFFFFFFFFFFFFFFFFFFFFFFFFFFFFFFFFFFFFFFFFFFFFFFFFFFFFFFFFFFFFFFFF  
FFFFFFFFFFFFFFFF:FF:FFFFFFFFFFFFFFFFFFFFFFFFFFFFFFFFFFFFFFFFFFFFFFFFFFFF  
@A00155:342:HHGFNDSXY:1:2326:21025:16203 2:N:0:GAACCTAG+TCCGCATA  
GGACTCGTCAGGTAGCCTACTAGACTACGACTTACACGGTAGGTCGTGAACAAGCCCGGAGTACATCT  
CCTTTGGAAGTACAGGAGACCCCTCCGGTCTTGTCCAACCTCTGTTTCGGCAGAGGATACCGTGCTCCAT  
+  
FFFFFFFFFFFFFFFFFFFFFFFFFFFFFFFFFFFFFFFFFFFFFFFFFFFFFFFFFFFFFFFFFFFFFFFFFFFF  
FFFFFFFFFFFFFFFFFFFFFFFFFFFFFFFFFFFFFFFFFFFFFFFFFFFFFFFFFFFFFFFFFFFFFFFFFFFF  
@A00155:342:HHGFNDSXY:1:2326:32018:18490 2:N:0:GAACCTAG+TCCGCATA  
AAAAGGACTCGTCAGGTAGCCTACTAGACTACGACTTACACGGTAGGTCGTGAACAAGCCCGGAGTAC  
ATCTCCTTTGGAAGTACAGGAGACCCCTCCGGTCTTGTCCAACCTCTGTTTCGGCAGAGGATACCGTGCT  
+  
FFFFFFFFFFFFFFFFFFFFFFFFFFFFFFFFFFFFFFFFFFFFFFFFFFFFFFFFFFFFFFFFFFFFFFFFFFFF  
FFFFFFF,FFFF:FFFFFFFF: :FFFFFFFFFFFFFFFF:FFFFFFFFFFFFFFFFFFFFFFFFFFFFFFFF

```
@A00155:342:HHGFNDSXY:1:2326:6189:31876 2:N:0:GAACCTAG+TCCGCATA
TAGGAGACCCCTCCGGTCTTGTTCCAACCTCTGTTTCGGCAGAGGATACCGTGCTCCACAGCTGTAAGG
CTGTGGGCCCGAGAGAAGTCGCTCTCTCTCGCCCTCCACATCCCTCTCGGTATTGAGATGACCATAGG
+
FFFFFFFFFFFFFFFFFFFFF:FFFFFFFFFFFFFFFFFFFFF:FFFFFF,FFFFFFFFFFFFFFFFFFFFFF
F:FFFFFFFFFFFFFFFFF,FFFFFFFFFFFFFFFFFFFFFFFFFFFFFFFFFFFFFFFFFFFFFFFFF:, , FFFFFFFFFFFFFFFF
@A00155:342:HHGFNDSXY:1:2326:32832:32049 2:N:0:GAACCTAG+TCCGCATA
CTTTGGAAGTACTAGGAGACCCCTCCGGTCTTGTTCCAACCTCTGTTTCGGCAGAGGATACCGTGCTCCACA
GCTGTAAGGCTGTGGGCCCGAGAGAAGTCGCTCTCTCTCGCCCTCTACATCCCTCTCGGCATTGAGAT
+
FFFFFFFFFFFFFFFFFFFFFFFFFFFFFFFFFFFFFFFFFFFFFFFFFFFFFFFFFFFFFFFFF,FFFFFF,FFFFFFFFF
FFFFFFFFFFFFFFFFFFFFFFFFFFFFFFFFFFFFFFFFFFFFFFFFFFFFFFFFFFFFFFFFF:FFFFFFFFFFFFFFFFFFFFFFFFFFFFFFFFF:
@A00155:342:HHGFNDSXY:1:2327:9561:2362 2:N:0:GAACCTAG+TCCGCATA
ACACCGCCTTAGATCAGCTGTGTCCACTTAAGGACTCACCTCTGGCCTATGGTCATCTCAATGCCGAG
AGGGATGTAGAGGGCGAGAGAGAGCGACTTCTCTCGGGCCCACAGCCTTACAGCTGTGGAGCACGGTA
+
FFFFFFFFFFFFFFFFFFFFFFFFFFFFFFFFFFFFFFFFFFFFFFFFFFFFFFFFFFFFFFFFF,FFFFFF:FFFFFFFFFFFFFFFFFFFFFFFFFFFFFFFFF
FFFFFFFF:FFFFFFFFFFFFFFFFFFFFFFFFFFFFFFFFFFFFFFFFFFFFFFFFFFFFFFFFFFFFFFFFF
@A00155:342:HHGFNDSXY:1:2327:12255:23093 2:N:0:GAACCTAG+TCCGCATA
GTAAGTTTCGTCCTAAAAAGGACTCGTCAGGTAGCCTACTAGACTACGACTTACACGGTAGGTCGTGA
ACAAGCCCCGGAGTACATCTCCTTTGGAAGTACTAGGAGACCCCTCCGGTCTTGTTCCAACCTCTGTTTCGGC
+
FFFFFFFFFFFFFFFFFFF:FFFFFFFFFFFFFFFFFFFFFFFFFFFFF:FF:FFFFFFFFFFFFFFFFFFFFFFFFFFFFFFFFF
FFFFFFFFFFFFFFFFFFFFFFFFFFFFFFFFFFFFFFFFFFFFFFFFFFFFFFFFFFFFFFFFF:FFFFFFFF:FFFFF
@A00155:342:HHGFNDSXY:1:2327:24017:23891 2:N:0:GAACCTAG+TCCGCATA
TACATCTCCTTTGGAAGTACTAGGAGACCCCTCCGGTCTTGTTCCAACCTCTGTTTCGGCAGAGGATACCGT
GCTCCACAGCTGTAAGGCTGTGGGCCCGAGAGAAGTCGCTCTCTCTCGCCCTCCACATCCCTCTCGGC
+
FFFFFFFFFFFFFFFFFFFFFFFFFFFFFFFFFFFFFFFFFFFFFFFFFFFFFFFFFFFFFFFFF
FFFFFFFFFFFFFFFFFFFFFFFFFFFFFFFFFFFFFFFFFFFFFFFFFFFFFFFFFFFFFFFFF
@A00155:342:HHGFNDSXY:1:2327:31195:24580 2:N:0:GAACCTAG+TCCGCATA
AGAGTTGTGTAAGTTTTGTCCTAAAAAGGACTCGTCAGGTAGCCTACTAGACTACGACTTACACGGTA
GGTCGTGAACAAGCCCGGAGTACATCTCCTTTGGAAGTACTAGGAGACCCCTCCGGTCTTGTTCCAACCTCT
+
FFFFFFFFFFFFFFF:FFFFFFFFF,FFFFFFFFFFFFFFFFFFFFFFFFFFFFFFFFFFFFF:FFFF,FFFFFFFFF:FFF
FFFFFFFFFFFFFFFFFFFFFFFFFFFFFFFFFFFFFFFFFFFFFFFFFFFFFFFFFFFFFFFFF,FFFFFFFFFFFFFFFFFFFFFFFF:F,FFFFFFFFF
@A00155:342:HHGFNDSXY:1:2327:6922:30577 2:N:0:GAACCTAG+TCCGCATA
TCTTGTTCCAACCTCTGTTTCGGCAGAGGATACCGTGCTCCACAGCTGTAAGGCTGTGGGCCCGAGAGA
AGTCGCTCTCTCTCGCCCTCCACATCCCTCTCGGCATTGAGATGACCATAGGCCAGAGGTGAGTCCTT
+
FFFFFFFFFFFFFFFFFFFFFFFFFFFFFFFFFFFFFFFFFFFFFFFFFFFFFFFFFFFFFFFFF
FFFFFFFFFFFFFFFFFFFFFFFFFFFFFFFFFFFFFFFFFFFFFFFFFFFFFFFFFFFFFFFFF:FF:FFFFFFFFFFFFFFFFFFFFFFFFFFFFFFFFF
@A00155:342:HHGFNDSXY:1:2327:30563:32252 2:N:0:GAACCTAG+TCCGCATA
GCCTATGGTCATCTCAATGCCGAGAGGGATGTGGAGGGCGAGAGAGAGCGACTTCTCTCGGGCCCACA
GCCTTACAGCTGTGGAGCACGGTATCCTCTGCCGAAACAGAGGTTGGACAAGACCGGAG
+
FFFFFFFFFFFFFFFFFFFFFFFFFFFFFFFFFFFFFFFFFFFFFFFFFFFFFFFFFFFFFFFFF,FFFFFFFFFFFFFFFFFFFFFFFFFFFFFFFFF
FFFFFFFFFFFFFFFFFFFFFFFFFFFFFFFFFFFFFFFFFFFFFFFFFFFFFFFFFFFFFFFFF,FFFFFFFFFFFFFFFFFFFFFFFFFFFFFFFFF
@A00155:342:HHGFNDSXY:1:2327:31033:32690 2:N:0:GAACCTAG+TCCGCATA
TCCAAGGACGAAACCGTCGTTACTCTTTGAGTTGTGTAAGTTTCGTCCTAAAAAGGACTCGTCAGGTA
GCCTACTAGACTACGACTTACACGGTAGGTCGTGAACAAGCCCGGAGTACATCTCCTTTGGAAGTACTAGG
+
FFFFFFFFFFFFFFFFFFFFFFFFFFFFFFFFFFFFFFFFFFFFFFFFFFFFFFFFFFFFFFFFF,FFFFFFFFFFFFFFFFFFFFFFFFFFFFFFFFF
FFFFFFFFFFFFFFFFFFFFFFFFFFFFFFFFFFFFFFFFFFFFFFFFFFFFFFFFFFFFFFFFF,FFFFFFFFFFFFFFFFFFFFFFFFFFFFFFFFF
@A00155:342:HHGFNDSXY:1:2327:31033:32690 2:N:0:GAACCTAG+TCCGCATA
TCCAAGGACGAAACCGTCGTTACTCTTTGAGTTGTGTAAGTTTCGTCCTAAAAAGGACTCGTCAGGTA
GCCTACTAGACTACGACTTACACGGTAGGTCGTGAACAAGCCCGGAGTACATCTCCTTTGGAAGTACTAGG
```

[illegible]

```
@A00155:342:HHGFNDSXY:1:2330:4426:24690 2:N:0:GAACCTAG+TCCGCATA  
CCCCCTCCGGTCTTGTTCCAACCTCTGTTTCGGCAGAGGATACCGTGCTCCACAGCTGTAAAGGCTGTGGG  
CCCAGAGAAGTCGCTCTCTCTCGCCCTTCACATCCCTCTCGGCATTGAGATGACCATAGGCCAGAGG  
+  
FFFFFFFFFFFFFFFFFFFFFFFFFFFFFFFFFFFFFFFFFFFFFFFFFFFFFFFFFFFFFFFFFFFFF  
FFFFFFFFFFFFFFFFFFFFFFFFFFFFFFFFFFFFFFFFFFFFFFFFFFFFFFFFFFFFFFFFFFFFFF,  
@A00155:342:HHGFNDSXY:1:2330:27434:25520 2:N:0:GAACCTAG+TCCGCATA  
GGAGTACATCTCCTTTGGAAGTAGGAGACCCCTCCGGTCTTGTTCCAACCTCTGTTTCGGCAGAGGATA  
CCGTGCTCCACAGCTGTAAAGGCTGTGGGCCCGAGAGAAGTCGCTCTCTCTCGCCCTCTACAT  
+  
FFFFFFFFFFFFFFF,FFFFFFFFFFFFFFFFFFFFFFFFFFFFFFFFFFFFFFFFFFFFFFFFFFFFFFFF  
FFFFFFFFFFFFFFFFFFFFFF:FFFFFFFFFFFFFFFFFFFFFFFFFFFFFFFFFFFFFFFFFFFFFFF  
@A00155:342:HHGFNDSXY:1:2330:7148:26647 2:N:0:GAACCTAG+TCCGCATA  
TTTCGTCCTAAAAAGGACTCGTCAGGTAGCCTACTAGACTACGACTTACACGGTAGGTCTGAACAAG  
CCCGAGTACATCTCCTTTGGAAGTAGGAGACCCCTCCGGTCTTGTTCCAACCTCTGTTTCGGC  
+  
FFF:FFFFFFFFFFFFFFFFFFFFFFFFFFFFFFFFFFFFFFFFFFFFFFFFFFFFFFFFFFFFFFFFF  
FFFFFFFFFFFFFFFFFFFFFFFFFFFFFFFFFFFFFFFFFFFFFFFFFFFFFFFFFFFFFFFFFFFFFF,  
@A00155:342:HHGFNDSXY:1:2330:11171:26882 2:N:0:GAACCTAG+TCCGCATA  
GAAGTACATCTCCTTTGGAAGTAGGAGACCCCTCCGGTCTTGTTCCAACCTCTGTTTCGGCAGAGGATA  
AACGCTGTGGGCCCGAGAGAAGTCGCTCTCTCTCGCCCTCCACATCCCTCTCGGCATTGAGATG  
+  
FFFFFFFFFFFFFFFFFFFFFFFFFFFFFFFFFFFFFFFFFFFFFFFFFFFFFFFFFFFFFFFFFFFFF  
FFFFFFFFFFFFFFFFFFFFFFFFFFFFFFFFFFFFFFFFFFFFFFFFFFFFFFFFFFFFFFFFFFFFFF:  
@A00155:342:HHGFNDSXY:1:2330:20121:27101 2:N:0:GAACCTAG+TCCGCATA  
CCTACTAGACTACGACTTACACGGTAGGTCTGTGAACAAGCCCGAGTACATCTCCTTTGGAAGTAGGA  
GACCCCTCCGGTCTTGTTCCAACCTCTGTTTCGGCAGAGGATAACCGTGCTCCACAGCTGTAAAGGCTGTG  
+  
FFFFFFFFFFFFFFFFFFFFFFFFFFFFFFFFFFFFFFFFFFFFFFFFFFFFFFFFFFFFFFFFFFFFF  
FFFFFFFFFFFFFFFFFFFFFFFFFFFFFFFFFFFFFFFFFFFFFFFFFFFFFFFFFFFFFFFFFFFFFF,  
@A00155:342:HHGFNDSXY:1:2330:20374:27195 2:N:0:GAACCTAG+TCCGCATA  
CCTACTAGACTACGACTTACACGGTAGGTCTGTGAACAAGCCCGAGTACATCTCCTTTGGAAGTAGGA  
GACCCCTCCGGTCTTGTTCCAACCTCTGTTTCGGCAGAGGATAACCGTGCTCCACAGCTGTAAAGGCTGTG  
+  
FFFFFFFFFFFF:F:FFFFFFFF,F:FFFFFFFF,F:FFF:F:FFF:F,F:FFFFF:FFFF  
FFFFFFFFFFFFFFFFFFFFFFFFFFFFFFFFFFFFFFFFFFFFFFFFFFFFFFFFFFFFFFFFFFFFFF:  
@A00155:342:HHGFNDSXY:1:2330:23647:27665 2:N:0:GAACCTAG+TCCGCATA  
CAGGTAGCCTACTAGACTACGACTTACACGGTAGGTCTGTGAACAAGCCCGAGTACATCTCCTTTGGA  
ACTAGGAGACCCCTCCGGTCTTGTTCCAACCTCTGTTTCGGCAGAGGATAACCGTGCTCCACAGCTGTAA  
+  
FFFFFFFFFFFFFFFFFFFFFF:F,FFFFFFFFFFFFFFFFFFFFFFFFFFFFFFFFFFFFFFFFFFFFFFFF  
FFFFFFFFFFFFFFFFFFFFFFFFFFFFFFFFFFFFFFFFFFFFFFFFFFFFFFFFFFFFFFFFFFFFFF:  
@A00155:342:HHGFNDSXY:1:2330:26268:30921 2:N:0:GAACCTAG+TCCGCATA  
GAGACCCCTCCGGTCTTGTTCCAACCTCTGTTTCGGCAGAGGATAACCGTGCTCCACAGCTGTAAAGGCTG  
TGGGCCCGAGAGAAGTCGCTCTCTCTCGCCCTCCACATCCCTCTCGGCATTGAGATGACC  
+  
FFFFFFFFFFFFFFFFFFFFFFFFFFFFFFFFFFFFFFFFFFFFFFFFFFFFFFFFFFFFFFFFFFFFF  
FFFFFFFFFFFFFFFFFFFFFFFFFFFFFFFFFFFFFFFFFFFFFFFFFFFFFFFFFFFFFFFFFFFFFF  
@A00155:342:HHGFNDSXY:1:2330:23574:31454 2:N:0:GAACCTAG+TCCGCATA  
GAGACCCCTCCGGTCTTGTTCCAACCTCTGTTTCGGCAGAGGATAACCGTGCTCCACAGCTGTAAAGGCTG  
TGGGCCCGAGAGAAGTCGCTCTCTCTCGCCCTCCACATCCCTCTCGGCATTGAGATGACC
```

[illegible]



@A00155:342:HHGFNDSXY:1:2333:21097:35712 2:N:0:GAACCTAG+TCCGCATA  
CTCTTCGAGTTGTGTAAGTTTCGTCCTAAAAAGGACTCGTAAGGTAGCCTACTAGACTACGACTTACA  
CGGTAGGTCGTGAACAAGCCCGGAGTACATCTCCTTTGGAAGTACGAGACCCCTCCGGTCTTGTCCAA  
+  
FFFFFFFFFFFFFFFFFFFFFFFFFFFFFFFFFFFFFFFFFFFFFFFFFFFFFFFFFFFFFFFFFFFFFFFF  
:FFFFFFFFFFFFFFFFFFFFFFFFFFFFFFFFFFFFFFFFFFFFFFFFFFFFFFFFFFFFFFFFFFFFFFFF  
@A00155:342:HHGFNDSXY:1:2334:25129:13072 2:N:0:GAACCTAG+TCCGCATA  
CCAACCTCTGTTTCGGCAGAGGATACCGTGCTCCACAGCTGTAAGGCTGTGGGCCCCGAGAGAAGTCGC  
TCTCTCTCGCCCTCCACATCCCTCTCGGCATTGAGATGACCATAGGCCAGAGGTGAGTCCTTAAGTGG  
+  
FFFFFFFFFFFFFFFFFFFFFFFFFFFFFFFFFFFFFFFFFFFFFFFFFFFFFFFFFFFFFFFFFFFFFFFF  
FFFFFFFFFFFFFFFFFFFFFFFFFFFFFFFFFFFFFFFFFFFFFFFFFFFFFFFFFFFFFFFFFFFFFFFF  
@A00155:342:HHGFNDSXY:1:2334:24406:18677 2:N:0:GAACCTAG+TCCGCATA  
ACGAAACCGTCGTTACTCTTCGAGTTGTGTAAGTTTCGTCCTAAAAAGGACTCGTCAGGTAGCCTACT  
AGACTACGACTTACACGGTAGGTCGTGAACAAGCCCGGAGTACATCTCCTTTGGAAGTACGAGACCC  
+  
FFFFFFFFF:FFFFFFFFFFFFFFFFF:FFFFFFF:FF:FFFFFFFFFFFFFFFFFFFFFFFFF:FFF:FFFFFF  
FFFFFFFFFFFFFFFFFFFFFFFFFFFFFFFFFFFFFFFFFFFFFFFFFFFFFFFFFFFFFFFFFFFFFFFF  
@A00155:342:HHGFNDSXY:1:2334:21269:28369 2:N:0:GAACCTAG+TCCGCATA  
CAGGTAGCCTACTAGACTACGACTTACACGGTAGGTCGTGAACAAGCCCGGAGTACATCTCCTTTGGA  
ACCAGGAGACCCCTCCGGTCTTGTCCAACCTCTGTTTCGGCAGAGGATACCGTGCTCCACAGCTGTAA  
+  
FFFFFFFFFFFFFFFFFFFFFFFFFFFFFFFFFFFFFFFFFFFFFFFFFFFFFFFFFFFFFFFFFFFFFFFF  
:FFFFFFFFFFFFFFFFFFFFFFFFFFFFFFFFFFFFFFFFFFFFFFFFFFFFFFFFFFFFFFFFFFFFFFFF  
@A00155:342:HHGFNDSXY:1:2334:8630:29778 2:N:0:GAACCTAG+TCCGCATA  
TCTTGTCCAACCTCTGTTTCGGCAGAGGATACCGTGCTCCACAGCTGTAAGGCTGTGGGCCCCGAGAGA  
AGTCGCTCTCTCTCGCCCTCCACATCCCTCTCGGCATTGAGATGACCATAGGCCAGAGGTGAGTCCTT  
+  
FFFFFFFFFFFFFFFFF:FFFFFFFFFFFFFFFFFFFFFFFFFFFFFFFFFFFFFFFFFFFFFFFFF,FFFFFFFFFFFFFFFF  
FFFFFFFFFFFFFFFFFFFFFFFFFFFFFFFFFFFFFFFFFFFFFFFFFFFFFFFFFFFFFFFFFFFFFFFF  
@A00155:342:HHGFNDSXY:1:2334:20907:36448 2:N:0:GAACCTAG+TCCGCATA  
TAGGAGACCCCTCCGGTCTTGTCCAACCTCTGTTTCGGCAGAGGATACCGTGCTCCACAGCTGTAAGG  
CTGTGGGCCCCGAGAGAAGTCGCTCTCTCTCGCCCTCCACATCCCTCTCGGCATTGAGATGAC  
+  
FFFFFFFFFFFFFFFFFFFFFFFFF:FFFFFFF:FFFFFFFFFFFFFFFFFFFFFFFFFFFFFFFFFFFFFFFFF:FFFF  
FFFFFFFFFFFFFFFFFFFFFFFFFFFFFFFFFFFFFFFFFFFFFFFFFFFFFFFFFFFFFFFFFFFFFFFFF:F  
@A00155:342:HHGFNDSXY:1:2335:9498:19695 2:N:0:GAACCTAG+TCCGCATA  
GTGAACAAGCCCGGAGTACATCTCCTTTGGAAGTACGAGACCCCTCCGGTCTTGTCCAACCTCTGTTT  
CGGCAGAGGATACCGTGCTCCACAGCTGTAAGGCTGTGGGCCCCGAGAGAAGTCGCTCTCTCTCGCCCT  
+  
FFFFFFFFFFFFFFFFFFFFFFFFFFFFFFFFFFFFFFFFFFFFFFFFFFFFFFFFFFFFFFFFFFFFFFFF  
FFFFFFFFFFFFFFFFFFFFFFFFFFFFFFFFFFFFFFFFFFFFFFFFFFFFFFFFFFFFFFFFFFFFFFFF:FFF:FFFFFFFFFFFFFFFFFFFFFFFFFFFFFFFFF:FFFF  
@A00155:342:HHGFNDSXY:1:2335:23764:24392 2:N:0:GAACCTAG+TCCGCATA  
CCGGAGTACATCTCCTTTGGAAGTACGAGACCCCTCCGGTCTTGTCCAACCTCTGTTTCGGCAGAGGA  
TACCGTGCTCCACAGCTGTAAGGCTGTGGGCCCCGAGAGAAGTCGCTCTCTCTCGCCCTCTACATCCCT  
+  
FFFFFFFFFFFFFFFFFFFFFFFFFFFFFFFFFFFFFFFFFFFFFFFFFFFFFFFFFFFFFFFFFFFFFFFF,FFFFFFFFFFFFFFFFFFFFFFFFFFFFFFFFF  
FFFFFFFFFFFFFFFFFFFFFFFFFFFFFFFFFFFFFFFFFFFFFFFFFFFFFFFFFFFFFFFFFFFFFFFF:FFFFFFFFFFFFFFFF  
@A00155:342:HHGFNDSXY:1:2335:6343:35900 2:N:0:GAACCTAG+TCCGCATA  
AGTACATCTCCTTTGGAAGTACGAGACCCCTCCGGTCTTGTCCAACCTCTGTTTCGGCAGAGGATACC  
GTGCTCCACAGCTGTAAGGCTGTGGGCCCCGAGAGAAGTCGCTCTCTCTCTCCCTCCACAT  
+  
FFFFFFFFFFFFFFF,FFFFF,FFFFFFFF:FFFFF:,FF::FFF::FFFFFFFFF,FF:FFFF::FFFFFFFF  
::F,FFF:F:FFFF,,:FFFFFFFF,FFF:FFFFFFFF:FFFFFFFFF,,FF,FFFF::

[illegible]

@A00155:342:HHGFNDSXY:1:2338:27236:5478 2:N:0:GAACCTAG+TCCGCATA  
 GGACTCGTCAGGTAGCCTACTAGACTACGACTTACACGGTAGGTCGTGAACAAGCCCGGAGTACATCT  
 CCTTTGGAAGTAGGAGACCCCTCCGGTCTTGTCCAACCTCTGTTTCGGCAGAGGATACCGTGCTCCAC  
 +  
 FFFFFFFFFFFFFFFFFFFFFFFFFFFFFFFFFFFFFFFFFFFFFFFFFFFFFFFFFFFFFFFFFFFFFFFFFF  
 FFFFFFFFFFFFFFFFFFFFFFFFFFFFFFFFFFFFFFFFFFFFFFFFFFFFFFFFFFFFFFFFFFFFFFFFFF  
 @A00155:342:HHGFNDSXY:1:2338:15438:6715 2:N:0:GAACCTAG+TCCGCATA  
 TACGACTTACACGGTAGGTCGTGAACAAGCCCGGAGTACATCTCCTTTGGAACCAGGAGACCCCTCCG  
 GTCTTGTCCAACCTCTGTTTCGGCAGAGGATACCGTGCTCCACAGCTGTAAGGCTGTGGGCCCG  
 +  
 FFFFFFFFFFFFFFFFFFFFFFFFFFFFFFFFFFFFFFFFFFFFFFFFFFFFFFFFFFFFFFFFFFFFFFFFFF  
 FFFFFFFFFFFFFFFFFFFFFFFFFFFFFFFFFFFFFFFFFFFFFFFFFFFFFFFFFFFFFFFFFFFFFFFFFF  
 @A00155:342:HHGFNDSXY:1:2338:30553:11882 2:N:0:GAACCTAG+TCCGCATA  
 CGGTAGGTCGTGAACAAGCCCGGAGTACATCTCCTTTGGAAGTAGGAGACCCCTCCGGTCTTGTCCAA  
 CCTCTGTTTCGGCAGAGGATACCGTGCTCCACAGCTGTAAGGCTGTGGGCCCGAGAGAAGTCGCTCTC  
 +  
 FFFFFFFFFFFFFFFFFFFFFFFFFFFFFFFFFFFFFFFFFFFFFFFFFFFFFFFFFFFFFFFFFFFFFFFFFF  
 FFFFFFFFFFFFFFFFFFFFFFFFFFFFFFFFFFFFFFFFFFFFFFFFFFFFFFFFFFFFFFFFFFFFFFFFFF  
 @A00155:342:HHGFNDSXY:1:2338:22896:12587 2:N:0:GAACCTAG+TCCGCATA  
 ACTTACACGGTAGGTCGTGAACAAGCCCGGAGTACATCTCCTTTGGAAGTAGGAGACCCCTCCGGTCT  
 TGTCCAACCTCTGTTTCGGCAGAGGATACCGTGCTCCACAGCTGTAAGGCTGTGGGCCCGAGAGAAGT  
 +  
 FFFFFFFFFFFFFFFFFFFFFFFFFFFFFFFFFFFFFFFFFFFFFFFFFFFFFFFFFFFFFFFFFFFFFFFFFF  
 FFFFFFFFFFFFFFFFFFFFFFFFFFFFFFFFFFFFFFFFFFFFFFFFFFFFFFFFFFFFFFFFFFFFFFFFFF  
 @A00155:342:HHGFNDSXY:1:2338:4038:18067 2:N:0:GAACCTAG+TCCGCATA  
 ACGACTTACACGGTAGGTCGTGAACAAGCCCGGAGTACATCTCCTTTGGAACCAGGAGACCCCTCCGG  
 TCTTGTCCAACCTCTGTTTCGGCAGAGGATACCGTGCTCCACAGCTGTAAGGCTGTGGGCCCGAGAGA  
 +  
 F:FFFF:FFFF::FFFF::FF:FFFFFFFFFFFFFFFFFFFFFFFF:FFFFFF,FFFFFFFF:FFFF:FFFF:  
 FFFFFFFFFFFFFFFFFFFFFFFFFF,FFFFFFFFF:F:F,F:FFFFFF:FFF,FFF:FF:FFFF,FFFF:F  
 @A00155:342:HHGFNDSXY:1:2338:30798:23171 2:N:0:GAACCTAG+TCCGCATA  
 GGTCTGTGAACAAGCCCGGAGTACATCTCCTTTGGAAGTAGGAGACCCCTCCGGTCTTGTCCAACCTCT  
 GTTTCGGCAGAGGATACCGTGCTCCACAGCTGTAAGGCTGTGGGCCCGAGAGAAGTCGCTCTCTCTCG  
 +  
 FFFFFFFFFFFFFFFFFFFFFFFFFFFFFFFFFFFFFFFFFFFFFFFFFFFFFFFFFFFFFFFFFFFFFFFFFF  
 FFFFFFFFFFFFFFFFFFFFFFFFFFFFFFFFFFFFFFFFFFFFFFFFFFFFFFFFFFFFFFFFFFFFFFFFFF  
 @A00155:342:HHGFNDSXY:1:2338:2392:34225 2:N:0:GAACCTAG+TCCGCATA  
 ATTGAGATGACCATAGGCCAGAGGTGAGTCCTTAAGTGGACACAGCTGATCTAAGGCGGTGTGGCGGG  
 GCATGGGTTTGAACCCCATGACGGTCGAGTCTAGTAGGCTCCCTGATGAGTCCGTTCCAAGGACGA  
 +  
 FFFF:FFFFFFFFFFFFFFFFFFFFFFFFFFFFFFFFFFFFFFFF:FFFFFFFFF:FFFFFF,FFFF:FFFF  
 FFFFFFFFFF:FFF:FFFFFFFF:FFFFFFFFFFFF:F,FFF:FFFFFFFFF:F,FFFFFFFFF  
 @A00155:342:HHGFNDSXY:1:2339:23321:4961 2:N:0:GAACCTAG+TCCGCATA  
 GTGTAAGTTTCGTCTATAAAAGGACTCGTCAGGTAGCCTACTAGACTACGACTTACACGGTAGGTCGT  
 GAACTAGCCCGGAGTACATCTCCTTTGGAAGTAGGAGACCCCTCCGGTCTTGTCCAACCTCTGTTTCG  
 +  
 FFFFFFFF,FFFFFFFFFFFFFFFFFFFFFFFFFFFFFFFFFFFFFFFF:FFFFFFFFFFFFFFFFFFFFFFFF  
 FFFFFFFFFFFFFFFFFFFFFFFFFF:FFFFFFFFFFFFFFFF:FFFFFFFFFFFFFFFFFFFFFFFF  
 @A00155:342:HHGFNDSXY:1:2339:22869:19648 2:N:0:GAACCTAG+TCCGCATA  
 GGACTCGTCAGGTAGCCTACTAGACTACGACTTACACGGTAGGTCGTGAACAAGCCCGGAGTACATCT  
 CCTTTGGAAGTAGGAGACCCCTCCGGTCTTGTCCAACCTCTGTTTCGGCAGAGGATACCGTGCTCCAC  
 +  
 FFFFFFFFFFFFFFFFFFFFFFFFFFFFFFFFFFFFFFFFFFFFFFFFFFFFFFFFFFFFFFFFFFFFFFFFFF  
 FFFFFFFFFFFFFFFFFFFFFFFFFF:FFFFFFFFFFFFFFFFFFFFFFFFFFFFFFFFFFFFFFFFFFFFF  
 @A00155:342:HHGFNDSXY:1:2339:22869:19648 2:N:0:GAACCTAG+TCCGCATA  
 GGACTCGTCAGGTAGCCTACTAGACTACGACTTACACGGTAGGTCGTGAACAAGCCCGGAGTACATCT  
 CCTTTGGAAGTAGGAGACCCCTCCGGTCTTGTCCAACCTCTGTTTCGGCAGAGGATACCGTGCTCCAC  
 +  
 FFFFFFFFFFFFFFFFFFFFFFFFFFFFFFFFFFFFFFFFFFFFFFFFFFFFFFFFFFFFFFFFFFFFFFFFFF  
 FFFFFFFFFFFFFFFFFFFFFFFFFF:FFFFFFFFFFFFFFFFFFFFFFFFFFFFFFFFFFFFFFFFFFFFF

@A00155:342:HHGFNDSXY:1:2339:9986:22733 2:N:0:GAACCTAG+TCCGCATA  
GTTGTGTAAGTTTCGTCTAAAAAGGACTCGTCAGGTAGCCTACTAGACTACGACTTACACGGTAGGT  
CGTGAACAAGCCCGGAGTACATCTCCTTTGGAAGTACAGAGACCCCTCCGGTCTTGTCCAACCTCTGTT  
+  
FFFFFFFFFFFFFFFFFFFFFFFFFFFFFFFFFFFFFFFFFFFFFFFFFFFFFFFFFFFFFFFFFFFFFFFF  
FFFFFFFFFFFFFFFFFFFFFFFFFFFFFFFFFFFFFFFFFFFFFFFFFFFFFFFFFFFFFFFFFFFFFFFF  
@A00155:342:HHGFNDSXY:1:2339:18249:30342 2:N:0:GAACCTAG+TCCGCATA  
CACGGTAGGTCGTGAACAAGCCCGGAGTACATCTCCTTTGGAACCAGGAGACCCCTCCGGTCTTGTCC  
AACCTCTGTTTCGGCAGAGGATACCGTGCTCCACAGCTGTAAGGCTGTGGGCCCGAGAGAAGTCGCTC  
+  
FFFFFFFFFFFFFFFFFFFFFFFFFFFFFFFFFFFFFFFFFFFFFFFFFFFFFFFFFFFFFFFFFFFFFFFF  
FFFFFFFFFFFFFFFFFFFFFFFFFFFFFFFFFFFFFFFFFFFFFFFFFFFFFFFFFFFFFFFFFFFFFFFF  
@A00155:342:HHGFNDSXY:1:2339:16007:33880 2:N:0:GAACCTAG+TCCGCATA  
AGGACGAAACCGTCGTTACTCTTTGAGTTGTGTAAGTTTCGTCTAAAAAGGACTCGTCAGGTAGCCT  
ACTAGACTACGACTTACACGGTAGGTCTGTAACAAGCCCGGAGTACATCTCCTTTGGAAGTACAGAGAC  
+  
FFFFFFFFFFFFFF:FFFFFFFF,F:FFFFFFFFFFFFFF,FFFFFFFF:FFFFFFFFFFFFFFFFFFFF  
FFFF:FFFFFFFFFFFFFFFFFFFFFFFFFFFFFFFFFFFFFFFFFFFFFFFFFFFFFFFFFFFFFFFFFFFF:F  
@A00155:342:HHGFNDSXY:1:2339:7292:35884 2:N:0:GAACCTAG+TCCGCATA  
GTGTAAGTTTCGACCTAAAAAGGACTCGTCAGGTAGCCTACTAGACTACGACTTACACGGTAGGTCTG  
GAACAAGCCCGGAGTACATCTCCTTTGGAAGTACAGAGACCCCTCCGGTCTTGTCCAACCTCTGTTTCG  
+  
FFF:FFF:F:F,FFFFFFFFFFFFFFFFFFFFFFFFFFFFFFFFFFFFFFFFFFFFFFFFFFFFFFFFFFFF  
FFF:FF:FFF:FFFFFFFF:FFF,,:FFFF:FFFFFFFFFFFF,F:FFFFF:FFFFFFFFFFFF  
@A00155:342:HHGFNDSXY:1:2340:32895:9862 2:N:0:GAACCTAG+TCCGCATA  
TAGACTACGACTTACACGGTAGGTCTGTAACAAGCCCGGAGTACATCTCCTTTGGAACCAGGAGACCC  
CTCCGGTCTTGTCCAACCTCTGTTTCGGCAGAGGATACCGTGCTCCACAGCTGTAAGGCTGTGGGCC  
+  
FFF:FFFF:FFFFFFFFFFFFFFFFFFFFFFFFFFFFFFFFFFFFFFFFFFFFFFFFFFFFFFFFFFFF  
FFFFFFFFFFFFFFFFFFFF,FFFFFFFFFFFFFFFF:FFFFFFFFFFFFFFFFFFFFFFFFFFFFFFFFFFFF  
@A00155:342:HHGFNDSXY:1:2340:26711:12493 2:N:0:GAACCTAG+TCCGCATA  
GACCCCTCCGGTCTTGTCCAACCTCTATTTCGGCAGAGGATACCGTGCTCCACAGCTGTAAGGCTGTG  
GGCCCGAGAGAAGTCGCTCTCTCTCGCCCTCCACATCCCTCTCGGCATTGAGATGACCATAGGC  
+  
FFFFFFFFFFFFFFFFFFFFFFFFFFFFFFFFFFFFFFFFFFFFFFFFFFFFFFFFFFFFFFFFFFFFFFFF  
FFFFFFFFFFFFFFFFFFFFFFFFFFFFFFFFFFFFFFFFFFFFFFFFFFFFFFFFFFFFFFFFFFFFFFFF  
@A00155:342:HHGFNDSXY:1:2340:12147:19366 2:N:0:GAACCTAG+TCCGCATA  
AGTTTCGTCTCTAAAAAGGACTCGTCAGGTAGCCTACTAGACTACGACTTACACGGTAGGTCTGTAACA  
AGCCCGGAGTACATCTCCTTTGGAAGTACAGAGACCCCTCCGGTCTTGTCCAACCTCTGTTTCGGCAGA  
+  
FFFFFFFFFFFFFFFFFFFFFFFFFFFFFFFFFFFFFFFFFFFFFFFFFFFFFFFFFFFFFFFFFFFFFFFF  
F,FFFFFFFFF:FFFFFFFFF:FFFFFFFFFFFFFFFFFFFFFFFFFFFFFFFFFFFFFFFFFFFFFFFF  
@A00155:342:HHGFNDSXY:1:2340:26259:32315 2:N:0:GAACCTAG+TCCGCATA  
GAACTAGGAGACCCCTCCGGTCTTGTCCAACCTCTGTTTCGGCAGAGGATACCGTGCTCCACAGCTGT  
AAGGCTGTTGGCCCGAGAGAAGTCGCTCTCTCTCGCCCTCCACATCCCTCTCGGCATTGAGATGACCA  
+  
FFFFFFFFFFFFFFFFFFFFFFFFFFFFFFFFFFFFFFFFFFFFFFFFFFFFFFFFFFFFFFFFFFFFFFFF  
FFFFFFFFFFFFFFFFFFFFFFFFFFFFFFFFFFFFFFFFFFFFFFFFFFFFFFFFFFFFFFFFFFFFFFFF  
@A00155:342:HHGFNDSXY:1:2341:32416:1172 2:N:0:GAACCTAG+TCCGCATA  
ACGAAACCGTCGTTACTCTTCGAGTTGTGTAAGTTTCGTCTGAAAAGGACTCGTCAGGTAGCCTACT  
AGACTACGACTTACACGGTAGGTCTGTAACAAGCCCGGAGTACATCTCCTTTGGAAGTACAGAGACCC  
+  
FFFFFFF:F,FFFFFFFF,FFF,F:FFFF:FFFF:FFFFFFFFF:,FFFFFFFFFFFFFFFF,FFFF:F,  
:FFFFFFFFF:FFFFFFFF:FFFFFFFFFFFF,FFFFFFFFFFFF,FFFFFF,FFFF:FFFFFFFFFFFF





```
@A00155:342:HHGFNDSXY:1:2348:24388:21527 2:N:0:GAACCTAG+TCCGCATA  
TTTCGTCCTAAAAAGGACTCGTCAGGTAGCCTACTAGACTACGACTTACACGGTAGGTCGTGAACAAG  
CCCCGAGTACATCTCCTTTGAACTAGGAGACCCCTCCGGTCTTGCCAACCTCTGTTTTCGGCAGAGG  
+  
FFFFFFFFFFFFFFFFFFFFFFFFFFFFFFFFFFFFFFFFFFFFFFFFFFFFFFFFFFFFFFFFFFFFF:  
FFFFFFFF:F:FFF:FFFFFFFFFFFFFF::F:FFFFFFFFFFFFFFFFFFFFFFFF,F:FFFFFF:  
@A00155:342:HHGFNDSXY:1:2348:2691:21621 2:N:0:GAACCTAG+TCCGCATA  
TACTCTTTGAGTTGTGTAAGTTTCGTCCTAAAAAGGACTCGTCAGGTAGCCTACTAGACTACGACTTA  
CACGGTAGGTCGTGAACAAGCCCAGTACATCTCCTTTGAACTAGGAGACCCCTCCGGTCTTGTC  
+  
FFFFFFFFFFFFFFFFFFFFFFFFFFFFFFFFFFFFFFFFFFFFFFFFFFFFFFFFFFFFFFFFFFFFF:  
FFFFFFFF,F:FFF:FFFFFFFFFFFFFFFFFFFFFFFF,F:FFF:FFFFFFFFFFFFFFFFFFFFFFFF,  
@A00155:342:HHGFNDSXY:1:2348:15338:22357 2:N:0:GAACCTAG+TCCGCATA  
GGACTCGTCAGGTAGCCTACTAGACTACGACTTACACGGTAGGTCGTGAACAAGCCCAGTACATCT  
CCTTTGAACTAGGAGACCCCTCCGGTCTTGCCAACCTCTGTTTCGGCAGAGGATACCGTGCTCCAC  
+  
FFFFFFFFFFFFFFFFFFFFFFFFFFFFFFFFFFFFFFFFFFFFFFFFFFFFFFFFFFFFFFFFFFFFF:  
FFFFFFFFFFFFFFFF:FFFFFFFFFFFFFF:FFFFFFFFFFFFFFFF,F:FFF:FFFFFFFFFFFFFFFF,  
@A00155:342:HHGFNDSXY:1:2348:2284:22545 2:N:0:GAACCTAG+TCCGCATA  
GTTCCAAGGACGAAACCGTCGTTACTCTTCGAGTTGTGTAAGTTTCGTCCTAAAAAGGACTCGTCAGG  
TAGCCTACTAGACTACGACTTACACGGTAGGTCGTGAACAAGCCCAGTACATCTCCTTTGAACTA  
+  
FFFFFF:FFFF:F:FFF:FFFFFFFFFFFFFFFFFFFFFFFF,:FFFFFF:F:,::, :FFFFFFFFFF  
FFF:FFFFF,FFFFFFFFFFFFFF: :FFFFFFFFFFFFFF:FFFFFF: :FFFFFFFFFFFFFF:FFFF:FF:FF  
@A00155:342:HHGFNDSXY:1:2348:7066:29074 2:N:0:GAACCTAG+TCCGCATA  
AAAAGGACTCGTCAGGTAGCCTACTAGACTACGACTTACACGGTAGGTCGTGAACAAGCCCAGTAC  
ATCTCCTTTGAACTAGGAGACCCCTCCGGTCTTGCCAACCTCTGTTTCGGCAGAGGATACCGTGCT  
+  
FFFFF:FFFFFFFFFFFFFFFFFFFFFFFFFFFFFFFFFFFFFFFFFFFFFFFFFFFFFFFFFFFFFFFF:  
FFFFFFFFFFFFFFFFFFFFFFFFFFFFFFFFFFFFFFFFFFFFFFFFFFFFFFFFFFFFFFFFFFFFFFFF  
@A00155:342:HHGFNDSXY:1:2349:27407:20369 2:N:0:GAACCTAG+TCCGCATA  
CTTACACGGTAGGTCGTGAACAAGCCCAGTACATCTCCTTTGAACTAGGAGACCCCTCCGGTCTT  
GTCCAACCTCTGTTTCGGCAGAGGATACCGTGCTCCACAGCTGTAAGGCTGTGGGCCCGAGAGAAGTC  
+  
FFFFFFFFFFFFFFFFFFFFFFFFFFFFFFFFFFFFFFFFFFFFFFFFFFFFFFFFFFFFFFFFFFFFF:  
FFFFFFFFFFFFFFFFFFFFFFFFFFFFFFFFFFFFFFFFFFFFFFFFFFFFFFFFFFFFFFFFFFFFFFFF:  
@A00155:342:HHGFNDSXY:1:2350:19542:3865 2:N:0:GAACCTAG+TCCGCATA  
GTCCAACCTCTGTTTCGGCAGAGGATACCGTGCTCCACAGCTGTAAGGCTGTGGGCCCGAGAGAAGTC  
GCTCTCTCTCGCCCTTCACATCCCTCTCGGCATTGAGATGACCATAGGCCAGAGGTGAGTCCTTAAGT  
+  
FFFFFFFFFFFFFFFFFFFFF,FFFFFFFFFFFFFFFFFFFFFFFFFFFFFFFFFFFFFFFFFFFFFFFF  
FFFFFFFFFFFFFFFFFFFFFFFF:FFFFFFFFFFFFFF,FFFFFFFFFFFFFF:FFFFFFFFFFFFFFFF,FFF:  
@A00155:342:HHGFNDSXY:1:2350:13304:11663 2:N:0:GAACCTAG+TCCGCATA  
AACCAAGCCCAGTACATCTCCTTTGAACTAGGAGACCCCTCCGGTCTTGCCAACCTCTGTTTCGG  
CAGAGGATACCGTGCTCCACAGCTGTAAGGCTGTGGGCCCGAGAGAAGTCGCTCTCTCTCGCCCTCA  
+  
FFFFFFFFFFFFFFFFFFFFFFFFFFFFFFFFFFFFFFFFFFFFFFFFFFFFFFFFFFFFFFFFFFFFF:  
FFFFFFFFFFFFFFFFFFFFFFFFFFFFFFFFFFFFFFFFFFFFFFFFFFFFFFFFFFFFFFFFFFFFFFFF  
@A00155:342:HHGFNDSXY:1:2350:4716:17895 2:N:0:GAACCTAG+TCCGCATA  
ACTTACACGGTAGGTCGTGAACAAGCCCAGTACATCTCCTTTGAACTAGGAGACCCCTCCGGTCT  
TGTTCAACCTCTGTTTCGGCAGAGGATACCGTGCTCCACAGCTGTAAGGCTGTGGGCCCGAGAGAAGT
```

[illegible]



@A00155:342:HHGFNDSXY:1:2353:14018:14434 2:N:0:GAACCTAG+TCCGCATA  
TCGTGAACAAGCCCCGAGTACATCTCCTTTGGAACCAGGAGACCCCTCCGGTCTTGCCAACCTCTGT  
TTCGGCAGAGGATACCGTGCTCCACAGCTGTAAGGCTGTGGGCCCGAGAGAAGTCGCTCTCTCTCGCC  
+  
FFFFFFFFFFFFFFFFFFFFFFFFFFFFFFFFFFFFFFFFFFFFFFFFFFFFFFFFFFFFFFFFFFFFFFFFFFFFF  
FFFFFFFFFFFFFF:FF:FFFFFFFFFFFFFFFFFFFFFFFFFFFFFFFFFFFFFFFFFFFFFFFFFFFFFFFFFFFFF,  
@A00155:342:HHGFNDSXY:1:2353:20699:21308 2:N:0:GAACCTAG+TCCGCATA  
GTTGTGTAAGTTTCGTCTCTAAAAAGGACTCGTCAGGTAGCCTACTAGACTACGACTTACACGGTAGGT  
CGTGAACAAGCCCCGAGTACATCTCCTTTGGAAGTACTAGGAGACCCCTCCGGTCTTGCCAACCTCTGTT  
+  
FFFFFFFFFFFFFFFFFFFFFFFFFFFFFFFFFFFFFFFFFFFFFFFFFFFFFFFFFFFFFFFFFFFFFFFFFFFFF  
FFFFFFFFFFFFFF:FFFF:FFFFFFFFFFFFFFFFFFFFFFFFFFFFFFFFFFFFFFFFFFFFFFFFFFFFFFFFFFFFF  
@A00155:342:HHGFNDSXY:1:2353:5837:34585 2:N:0:GAACCTAG+TCCGCATA  
CCTACTAGACTACGACTTACACGGTAGGTCGTGAACAAGCCCCGAGTACATCTCCTTTGGAACCAGGA  
GACCCCTCCGGTCTTGCCAACCTCTGTTTCGGCAGAGGATACCGTGCTCCACAGCTGTAAGGCTGTG  
+  
FFFFFFFFFFFFFFFFFFFFFFFFFFFFFFFFFFFFFFFFFFFFFFFFFFFFFFFFFFFFFFFFFFFFFFFFFFFFF  
FFFFFFFFFFFFFF:FFFF:FFFFFFFFFFFFFFFFFFFF,FF:FFF:FFFFFFFF  
FFFFFFFFFFFFFF:FFFFFFFFFFFFFFFFFFFF,FFFFFFFFFFFFFFFFFFFFFFFFFFFFFFFFFFFFFFFFFFFFF:  
@A00155:342:HHGFNDSXY:1:2354:12066:2065 2:N:0:GAACCTAG+TCCGCATA  
GGAGTACATCTCCTTTGGAAGTACTAGGAGACCCCTCCGGTCTTGCCAACCTCTGTTTCGGCAGAGGATA  
CCGTGCTCCACAGCTGTAAGGCTGTGGGCCCGAGAGAAGTCGCTCTCTCTCGCCCTCTACATCCCTCT  
+  
FFFFFFFFFFFFFFFFFFFFFFFFFFFFFFFFFFFFFFFFFFFFFFFFFFFFFFFFFFFFFFFFFFFFFFFFFFFFF  
:FFFFFFFFFFFFFFFFFFFFFFFFFFFFFFFFFFFFFFFFFFFF:F,FFFFFFFFFFFFFFFFFFFFFFFFFFFFFFFFFFFFF  
@A00155:342:HHGFNDSXY:1:2354:32099:17754 2:N:0:GAACCTAG+TCCGCATA  
AAGGACGAAACCGTCGTTACTCTTGAGTTGTGTAAGTTTCGTCTCTAAAAAGGACTCGTCAGGTAGCC  
TACTAGACTACGACTTACACGGTAGGTCGTGAACAAGCCCCGAGTACATCTCCTTTGGAAGTACTAGGAGA  
+  
FFFFFFFFFFFFFFFFFFFF:FFF:FFF:FFFFF:FFFFFFFFFFFFFFFFFFFFFFFFFFFF:FF,FFFFFFFFFFFFFFFFFFFFF:  
:FF::FF:FF:FFFFFFFFFFFFFFFFFFFF:FFFFFFFFFFFFFFFFFFFF:FF:F:F:FFF,F:F,F,FFFFFFFFFFFF:  
@A00155:342:HHGFNDSXY:1:2354:6234:19617 2:N:0:GAACCTAG+TCCGCATA  
TTACACGGTAGGTCGTGAACAAGCCCCGAGTACATCTCCTTTGGAAGTACTAGGAGACCCCTCCGGTCTTG  
TCCAACCTCTGTTTCGGCAGAGGATACCGTGCTCCACAGCTGTAAGGCTGTGGGCCCGAGAGAAGTCG  
+  
FFFF:FFFFFFFFFFFFFFFFFFFFFFFFFFFFFFFFFFFFFFFFFFFFFFFFFFFFFFFFFFFFFFFFFFFFFFFFFFFFF  
FFFFFFFFFFFFFFFFFFFFFFFFFFFFFFFFFFFFFFFFFFFFFFFFFFFFFFFFFFFFFFFFFFFFFFFFFFFFF:FF:FFFFFFFFFFFFFFFFFFFFF:FFFF  
@A00155:342:HHGFNDSXY:1:2354:23827:26788 2:N:0:GAACCTAG+TCCGCATA  
GCCTACTAGACTACGACTTACACGGTAGGTCGTGAACAAGCCCCGAGTACATCTCCTTTGGAAGTACTAGG  
AGACCCCTCCGGTCTTGCCAACCTCTGTTTCGGCAGAGGATACCGTGCTCCACAGCTGTAAGGCTGT  
+  
FFFFFFFFFFFFFFFFFFFFFFFFFFFFFFFFFFFFFFFFFFFFFFFFFFFFFFFFFFFFFFFFFFFFFFFFFFFFF,FFFFF  
F,FFFFFFFFFFFFFFFFFFFFFFFFFFFFFFFFFFFFFFFFFFFFFFFFFFFFFFFFFFFFFFFFFFFFFFFFFFFFF  
@A00155:342:HHGFNDSXY:1:2355:16260:17033 2:N:0:GAACCTAG+TCCGCATA  
GTACATCTCCTTTGGAACCAGGAGACCCCTCCGGTCTTGCCAACCTCTGTTTCGGCAGAGGATACCG  
TGCTCCACAGCTGTAAGGCTGTGGGCCCGAGAGAAGTCGCTCTCTCTCGCCCTCCACATCCCTCTCGG  
+  
FFFFFFFFFFFFFFFFFFFF:FFFFFFFFFFFFFFFFFFFFFFFFFFFFFFFFFFFFFFFFFFFFFFFFFFFFFFFFFFFFF  
FFFFFFFFFFFFFFFFFFFFFFFFFFFFFFFFFFFFFFFFFFFFFFFFFFFFFFFFFFFFFFFFFFFFFFFFFFFFF:FFFF:FFFFFFFFFFFFFFFFFFFFF:FFFFF  
@A00155:342:HHGFNDSXY:1:2356:27760:20290 2:N:0:GAACCTAG+TCCGCATA  
ACGAAACCGTCGTTACTCTTCGAGTTGTGTAAGTTTCGTCTCTAAAAAGGACTCGTCAGGTAGCCTACT  
AGACTACGACTTACACGGTAGGTCGTGAACAAGCCCCGAGTACATCTCCTTTGGAAGTACTAGGAGACCCC  
+  
FFFFFFFFFFFFFFFFFFFFFFFFFFFFFFFFFFFFFFFFFFFFFFFFFFFFFFFFFFFFFFFFFFFFFFFFFFFFF  
FFFFFFFFFFFFFFFFFFFFFFFFFFFFFFFFFFFFFFFFFFFFFFFFFFFFFFFFFFFFFFFFFFFFFFFFFFFFF:FFFF:FFFFFFFFFFFFFFFFFFFFF:FFFFF  
@A00155:342:HHGFNDSXY:1:2356:27760:20290 2:N:0:GAACCTAG+TCCGCATA  
ACGAAACCGTCGTTACTCTTCGAGTTGTGTAAGTTTCGTCTCTAAAAAGGACTCGTCAGGTAGCCTACT  
AGACTACGACTTACACGGTAGGTCGTGAACAAGCCCCGAGTACATCTCCTTTGGAAGTACTAGGAGACCCC  
+

@A00155:342:HHGFNDSXY:1:2356:20555:35744 2:N:0:GAACCTAG+TCCGCATA  
GTTGTGTAAGTTTCGTCTAAAAAGGACTCGTCAGGTAGCCTACTAGACTACGACTTACACGGTAGGT  
CGTGAACAAGCCCGAGTACATCTCCTTTGGAACCAGGAGACCCCTCCGGTCTTGTCCAACCTCTGTT  
+  
FFFFFFFF:FFFF:FFFFFF::FFFFFFFFFFFFFFFFFFFFFFFFFFFFFFFFFFFFFFFFFFFFFFFF:  
FFFFFF:FFFF:FFFFFFFFFFFFFFFFFFFFFFFFFFFFFFFFFFFFFFFFFFFFFFFFFFFFFFFF:FFFFFF  
@A00155:342:HHGFNDSXY:1:2357:12156:1031 2:N:0:GAACCTAG+TCCGCATA  
GCCCCGAGTACATCTCCTTTGGAAGTACGAGACCCCTCCGGTCTTGTCCAACCTCTGTTTCGGCAGAG  
GATACCGTGCTCCACAGCTGTAAGGCTGTGGGCCCGAGAGAAGTCGCTCTCTCTCGCCCTCCACATC  
+  
FFFFFFFFFFFFFFFFFFFFFFFFFFFFFFFFFFFFFFFFFFFFFFFFFFFFFFFFFFFFFFFFFFFFFFFF:F,FFF  
FFFFFFFFFFFFFFFF,FFFFFFFF:FFFFFFFFFFFFFFFFFFFFFFFFFFFFFFFFFFFFFFFFFFFFFFFF  
@A00155:342:HHGFNDSXY:1:2357:6822:2691 2:N:0:GAACCTAG+TCCGCATA  
AGCCCCGAGTACATCTCCTTTGGAAGTACGAGACCCCTCCGGTCTTGTCCAACCTCTGTTTCGGCAGA  
GGATACCGTGCTCCACAGCTGTAAGGCTGTGGGCCCGAGAGAAGTCGCTCTCTCTCGCCCTCCACATC  
+  
FFFFFFFFFFFFFFFFFFFFFFFFFFFFFFFFFFFFFFFFFFFFFFFFFFFFFFFFFFFFFFFFFFFFFFFF:FF  
FFFFFFFFFFFFFFFFFFFFFFFFFFFFFFFFFFFFFFFFFFFFFFFFFFFFFFFFFFFFFFFFFFFFFFFFFFFF  
@A00155:342:HHGFNDSXY:1:2357:15221:13698 2:N:0:GAACCTAG+TCCGCATA  
GAAACCGTCGTTACTCTTCGAGTTGTGTAAGTTTCGTCTAAAAAGGACTCGTCAGGTAGCCTACTAG  
ACTACGACTTACACGGTAGGTCGTGAACAAGCCCGAGTACATCTCCTTTGGAAGTACGAGACCCCTC  
+  
FFFFFFFFFFFFFFFFFFFFFFFFFFFFFFFFFFFFFFFFFFFFFFFFFFFFFFFFFFFFFFFFFFFFFFFFFFFF  
FFFFFFFFFFFFFFFFFFFFFFFF:FFFFFFFFFFFFFFFFFFFFFFFFFFFFFFFFFFFFFFFFFFFF,FFFFFFFF  
@A00155:342:HHGFNDSXY:1:2357:2284:15217 2:N:0:GAACCTAG+TCCGCATA  
AGCCTACTAGACTACGACTTACACGGTAGGTCGTGAACAAGCCCGAGTACATCTCCTTTGGAAGTACG  
GAGACCCCTCCGGTCTTGTCCAACCTCTGTTTCGGCAGAGGATACCGTGCTCCACAGCTGTAAGGCTG  
+  
FFFFF:FF,FFFFFFFFFFFF:FFFFFFFFFFFFFFFF:FFFFFFFFFFFFFFFFFFFFFFFF:FFFFF:F  
FFFFFFFF,FFFF,FFFFFFFFFFFFFFFF:FFFFFF:,FFFFFFFFFFFFFFFFFFFFFFFF:FFFFF  
@A00155:342:HHGFNDSXY:1:2357:9652:27821 2:N:0:GAACCTAG+TCCGCATA  
TACATCTCCTTTGGAAGTACGAGACCCCTCCGGTCTTGTCCAACCTCTGTTTCGGCAGAGGATACCGT  
GCTCCACAGCTGTAAGGCTGTGGGCCCGAGAGAAGTCGCTCTCTCTCGCCCTCTACATCCCTCTCGGC  
+  
FFFFFFFFF:FFFFFFFFFFFFFFFFFFFFFFFFFFFFFFFFFFFFFFFFFFFFFFFFFFFFFFFFFFFFFFFF  
FFFFFFFFFFFFFFFFFFFFFFFFFFFFFFFFFFFFFFFFFFFFFFFFFFFFFFFFFFFFFFFFFFFFFFFFFFFF  
@A00155:342:HHGFNDSXY:1:2358:31168:6277 2:N:0:GAACCTAG+TCCGCATA  
CTTTTGTAGGACGAACTTACACAACCTCAAAGAGTAACGACGGTTTCGTCTTGGAAACGGACTCATCAG  
GGAGCCTACTAGACTCCGACCGTCATGGGGTTCAAACCCATGCCCGCCACACCGCCTTAGATCAGC  
+  
FF:FFFFFFFFFFFFFFFFFFFFFFFFFFFFFFFFFFFFFFFF:FFFFFF:FFFF:FFFFFF:F:FFFFFFFF  
FFFF:FFFFFFFFFFFFFFFFFFFF,FFFFFFFFFFFFFFFFFFFFFFFF:FFFFFFFFFFFFFFFFFFFFF  
@A00155:342:HHGFNDSXY:1:2358:24786:7560 2:N:0:GAACCTAG+TCCGCATA  
GTTGTGTAAGTTTCGTCTAAAAAGGACTCGTCAGGTAGCCTACTAGACTACGACTTACACGGTAGGT  
CGTGAACAAGCCCGAGTACATCTCCTTTGGAAGTACGAGACCCCTCCGGTCTTGTCCAACCTCTGTT  
+  
FFFFFFFFFFFFFFFFFFFFFFFFFFFFFFFFFFFFFFFFFFFFFFFFFFFFFFFFFFFFFFFFFFFFFFFFFFFF  
FFFFFFFFFFFFFFFFFFFFFFFFFFFFFFFFFFFFFFFFFFFFFFFF:FFFFFFFFFFFFFFFFF:,FFFFFFF:FFFF  
@A00155:342:HHGFNDSXY:1:2358:16486:26287 2:N:0:GAACCTAG+TCCGCATA  
AAGCCCCGAGTACATCTCCTTTGGAAGTACGAGACCCCTCCGGTCTTGTCCAACCTCTGTTTCGGCAG  
AGGATACCGTGCTCCACAGCTGTAAGGCTGTGGGCCCGAGAGAAGTCGCTCTCTCTCGCCCTCCACAT  
+  
FF:FFFFFFFFFFFFFFFFFFFFFFFFFFFFFFFFFFFFFFFF:FFFFFFFFFFFFFFFFFFFFFFFFFFFF  
,FFFFFFFFFFFFFFFFFFFF,FF,FFFFFFFFFFFFFFFFFFFFFFFF:FFFFFFFFFFFFFFFF:FFFFFFFF



@A00155:342:HHGFNDSXY:1:2361:19361:30170 2:N:0:GAACCTAG+TCCGCATA  
AAGCCCCGGAGTACATCTCCTTTGGAAGTAGGAGACCCCTCCGGTCTTGTC AACCTCTGTTTTCGGCAG  
AGGATACCGTGCTCCACAGCTGTAAGGCTGTGGGCCCGAGAGAAGTCGCTCTCTCTCGCCCTCCACAT  
+  
FFFFFFFF:FFFFFFFFFFFFFFFFFFFF,FFFFFFFFFFFFFFFFFFFFFFFFFFFFFFFFFFFFFFFFFFFFFFFFF:FFFFFFF  
FFFF,FFFFFFFFFFFFFFFFFFFF:FFFFFFFFFFFFFFFFFFFF:F::FFFFFFFFFFFFFFFFFFFFFFFFFFFF  
@A00155:342:HHGFNDSXY:1:2361:13621:31469 2:N:0:GAACCTAG+TCCGCATA  
GTGTAAGTTTCGTCTCTAAAAGGACTCGTCAGGTAGCCTACTAGACTACGACTTACACGGTAGGTCGT  
GAACAAGCCCCGGAGTACATCTCCTTTGGAAGTAGGAGACCCCTCCGGTCTTGTC AACCTCTGTTTCG  
+  
FFFFFFFFFFFFFFFFFFFFFFFFFFFFFFFFFFFFFFFFFFFFFFFFFFFFFFFFFFFFFFFFFFFFFFFFFFFFF:  
F:FFFFFFFFFFFFFFFFFFFF:FFFFFFFFFFFFFFFFFFFF:FFFFFFFFFFFFFFFFFFFFFFFFFFFFFFFFF  
@A00155:342:HHGFNDSXY:1:2361:31801:37027 2:N:0:GAACCTAG+TCCGCATA  
CTCCGACCGTCATGGGGGTTCAAACCCATGCCCGCCACACCGCCTTAGATCAGCTGTGTCCA CTAA  
GGACTCACCTCTGGCCTATGGTCATCTCAATGCCGAGAGGGATGTGGAGGGCGAGAGAGAGCGACTTC  
+  
FFFFFFF::FFFFFFF:FFFFF:FFFFF:FF:FFFFFFFFFFFFFFFFFFFF:FFFFFFF::FF:FFF:  
:FFF:FFFFFFFFFFFFFFFFFFFFFFFFFFFF:FF:,FFFF:F:F:F:FFFFF:FFFFFFFFFFFFFFFFF  
@A00155:342:HHGFNDSXY:1:2362:29342:31986 2:N:0:GAACCTAG+TCCGCATA  
GAAGTAGGAGACCCCTCCGGTCTTGTC AACCTCTGTTTCGGCAGAGGATACCGTGCTCCACAGCTGT  
AAGGCTGTGGGCCCGAGAGAAGTCGCTCTCTCTCGCCCTCCACATCCCTCTCGGCATTGAGATGACCA  
+  
FFFFFFFFFFFFFFFFFFFFFFFFFFFFFFFFFFFFFFFFFFFFFFFFFFFFFFFFFFFFFFFFFFFFFFFFFFFFF  
FFFFFFFFFFFFFFFFFFFF,FFFFFFFFFFFFFFFFFFFFFFFFFFFFFFFFFFFFFFFFFFFFFFFFF:FFFFFFF  
@A00155:342:HHGFNDSXY:1:2362:6515:34162 2:N:0:GAACCTAG+TCCGCATA  
CCTACTAGACTACGACTTACACGGTAGGTCGTGAACAAGCCCCGGAGTACATCTCCTTTGGAAGTAGGA  
GACCCCTCCGGTCTTGTC AACCTCTGTTTCGGCAGAGGATACCGTGCTCCACAGCTGTAAGGCTGTG  
+  
FFFFFFF:FFFFFFFFFFFFFFFFFFFFFFFFFFFFFFFFFFFFFFFFFFFFFFFFFFFFFFFFFFFFFFFFFFFFF:  
F:FFFFFFFFF:FFFFFFFFFFFFFFFFFFFF:FFFFFFF:FFFFFFFFFFFF,FFFFFFFFFFFFFFFFFFFFF  
@A00155:342:HHGFNDSXY:1:2362:6506:34178 2:N:0:GAACCTAG+TCCGCATA  
CCTACTAGACTACGACTTACACGGTAGGTCGTGAACAAGCCCCGGAGTACATCTCCTTTGGAAGTAGGA  
GACCCCTCCGGTCTTGTC AACCTCTGTTTCGGCAGAGGATACCGTGCTCCACAGCTGTAAGGCTGTG  
+  
FFFFFFFFFFFFFFFFFFFFFFFFFFFFFFFFFFFFFFFFFFFFFFFFFFFFFFFFFFFFFFFFFFFFFFFFFFFFF  
FFFFFFFFFFFFFFFFFFFF:FFFFFFFFFFFFFFFFFFFF:FFFFFFFFF:FFFFFFF:FFFFFFF  
@A00155:342:HHGFNDSXY:1:2362:31946:36871 2:N:0:GAACCTAG+TCCGCATA  
CACGGTAGGTCGTGAACAAGCCCCGGAGTACATCTCCTTTGGAAGTAGGAGACCCCTCCGGTCTTGTC  
AACCTCTGTTTCGGCAGAGGATACCGTGCTCCACAGCTGTAAGGCTGGGGGCCCGAGAGAAGTCGCTC  
+  
FFFFF,F,F,F:FFFFFFFFFFFFFFFFFFFF:FFFFFFFFFFFF:FFFFF,,FFFFF:FFFFFFFFFFFF,FF,FF  
:FFFFF:F:FFFFF,F,:FF,FFFF,FFFFFFFFFFFF,F,FFFF:FF,FFFFFFFFFFFF,F,FFFFF  
@A00155:342:HHGFNDSXY:1:2363:13223:4852 2:N:0:GAACCTAG+TCCGCATA  
CCGGTCTTGTC AACCTCTGTTTCGGCAGAGGATACCGTGCTCCACAGCTGTAAGGCTGTGGGCCCGA  
GAGAAGTCGCTCTCTCTCGCCCTACACATCCCTCTCGGCATTGAGATGACCATAGGCCAGAG  
+  
FFFFFFFFFFFFFFFFFFFFFFFFFFFFFFFFFFFFFFFFFFFFFFFFFFFFFFFFFFFFFFFFFFFFFFFFFFFFF  
F:FFFFFFFFFFFFFFFFFFFF:FFFFFFFFFFFFFFFFFFFF:FFFFFFFFFFFFFFFFFFFFFFFFFFFFF  
@A00155:342:HHGFNDSXY:1:2363:6515:23797 2:N:0:GAACCTAG+TCCGCATA  
AGGGGTCTCCTAGTTCAAAGGAGATGTACTCCGGGCTTGTTACACGACCTACCGTGTAAGTCGTAGTC  
TAGTAGGCTACCTGACGAGTCCTTTTTAGGACGAACTTACACA ACTCGAAGAGTAACGACGGTTTCG  
+  
FFFFFFFFFFFFFFFFFFFFFFFFFFFFFFFFFFFFFFFFFFFFFFFFFFFFFFFFFFFFFFFFFFFFFFFFFFFFF  
FFFFFFFFFFFFFFFFFFFF:FF:FFFFFFFFFFFF:FF:FF:F

[illegible]

[illegible]

[illegible]

```
@A00155:342:HHGFNDSXY:1:2371:12518:20791 2:N:0:GAACCTAG+TCCGCATA  
ACGACTTACACGGTAGGTTCGTGAACAAGCCCCGGAGTACATCTCCTTTGAACTAGGAGACCCCTCCGG  
TCTTGTTCCAACCTCTGTTTCGGCAGAGGATACCGTGCTCCACAGCTGTAAGGCTGTGGGCCCGAGAGA  
+  
FFFFFFFFFFFFFFFFFFFFFFFFFFFFFFFFFFFFFFFFFFFFFFFFFFFFFFFFFFFFFFFFFFFFF  
FFFFFFFFFFFFFFFFFFFFFFFFFFFFFFFFFFFFFFFFFFFFFFFFFFFFFFFFFFFFFFFFFFFFF  
@A00155:342:HHGFNDSXY:1:2371:4173:26349 2:N:0:GAACCTAG+TCCGCATA  
GACCCCTCCGGTCTTGTCCAACCTCTGTTTCGGCAGAGGATACCGTGCTCCACAGCTGTAAGGCTGTG  
GGCCCAGAGAGAAGTCGCTCTCTCTCGCCCTCCACATCCCTCTCGGCATTGAGATGACCATAGGC  
+  
FFFFFFFFFFFFFFFFFFFFFFFFFFFFFFFFFFFFFFFFFFFFFFFFFFFFFFFFFFFFFFFFFFFFF:  
FF, FFFFFFFF, FFFFFFFF, FFFFFFFF: FF:FFF, FF, F, FFFFFFF, , F, FFFF  
@A00155:342:HHGFNDSXY:1:2371:28736:28964 2:N:0:GAACCTAG+TCCGCATA  
TACGACTTACACGGTAGGTTCGTGAACAAGCCCCGGAGTACATCTCCTTTGAACTAGGAGACCCCTCCG  
GTCTTGTCCAACCTCTGTTTCGGCAGAGGATACCGTGCTCCACAGCTGTAAGGCTGTGGGCCCG  
+  
FFFFFFFFFFFFFFFFFFFFFFFFFFFFFFFFFFFFFFFFFFFFFFFFFFFFFFFFFFFFFFFFFFFFF:  
FFFFFFFFFFFFFFFFFFFFFFFFFFFFFFFFFFFFFFFFFFFFFFFFFFFFFFFFFFFFFFFFFFFFF  
@A00155:342:HHGFNDSXY:1:2371:13440:34945 2:N:0:GAACCTAG+TCCGCATA  
GAACTAGGAGACCCCTCCGGTCTTGTCCAACCTCTGTTTCGGCAGAGGATACCGTGCTCCACAGCTGT  
AAGGCTGTGGGCCCGAGAGAAGTCGCTCTCTCTCGCCCTCCACATCCCTCTTGGCATTGAGATGACCA  
+  
FFFFFFFFFFFFFFFFFFFFFFFFFFFFFFFFFFFFFFFFFFFFFFFFFFFFFFFFFFFFFFFFFFFFF  
FFFFFFFFFFFFFFFFFFFFFFFFFFFFFFFFFFFFFFFFFFFFFFFFFFFFFFFFFFFFFFFFFFFFF  
@A00155:342:HHGFNDSXY:1:2372:5683:5979 2:N:0:GAACCTAG+TCCGCATA  
GGACTCGTCAGGTAGCCTACTAGACTACGACTTACACGGTAGGTTCGTGAACAAGCCCCGGAGTACATCT  
CCTTTGAACTAGGAGACCCCTCCGGTCTTGTCCAACCTCTGTTTCGGCAGAGGATACCGTGCTCCAC  
+  
FFFFFFF: FFFFFFFF, FFFFFFFF: FFFF: FFFFFFFF: FFFFFFFF, FFFFFFFF  
: FFFFFFFF, FFF: FFFFFFFF: F, , FFFFFFFF, FFFFFFFF  
@A00155:342:HHGFNDSXY:1:2372:3911:7169 2:N:0:GAACCTAG+TCCGCATA  
GGACTCGTCAGGTAGCCTACTAGACTACGACTTACACGGTAGGTTCGTGAACAAGCCCCGGAGTACATCT  
CCTTTGAACTAGGAGACCCCTCCGGTCTTGTCCAACCTCTGTTTCGGCAGAGGATACCGTGCTCCAC  
+  
FFFFFFFFFFFFFF: FFFFFFFFFFFFFFFFFFFFFFFFFFFFFFFFFFFFFFFFFFFFFFFFFFFFFF  
FFF: FFFFFFFFFFFFFFFFFFFFFFFFFFFFFFFFFFFFFFFFFFFFFFFFFFFFFF: FFFFFFFF,  
@A00155:342:HHGFNDSXY:1:2372:15148:8469 2:N:0:GAACCTAG+TCCGCATA  
ACCTCTGTTTCGGCAGAGGATACCGTGCTCCACAGCTGTAAGGCTGTGGGCCCGAGAGAAGTCGCTCT  
CTCTCGCCCTCCACATCCCTCTCGGCATTGAGATGACCATAGGCCAGAGGTGAGTCCTTAAGTGGACA  
+  
FFF: FFFFFFFFFFFFFFFFFFFFFFFFFFFFFFFFFFFFFFFFFFFFFFFFFFFFFF: FFFFFFFF  
FFFFFFFFFFFFFFFFFFFFFFFFFFFFFFFFFFFFFFFFFFFFFFFFFFFFFFFFFFFFF: : FFFFFFFF  
@A00155:342:HHGFNDSXY:1:2372:6542:16235 2:N:0:GAACCTAG+TCCGCATA  
ACTTACACGGTAGGTTCGTGAACAAGCCCCGGAGTACATCTCCTTTGAACTAGGAGACCCCTCCGGTCT  
TGTTCCAACCTCTGTTTCGGCAGAGGATACCGTGCTCCACAGCTGTAAGGCTGTGGGCCCGAGAGAAGT  
+  
FFFFFFFFFFFFFFFFFFFFFFFFFFFFFFFFFFFFFFFFFFFFFFFFFFFFFFFFFFFFFFFFFFFFF  
FFFFFFFFFFFFFFFFFFFFFFFFFFFFFFFFFFFFFFFFFFFFFFFFFFFFFFFFFFFFFFFFFFFFF  
@A00155:342:HHGFNDSXY:1:2372:8621:21089 2:N:0:GAACCTAG+TCCGCATA  
CGTTACTCTTCGAGTTGTGTAAGTTTCGTCTAAAAAGGACTCGTCAGGTAGCCTACTAGACTACGAC  
TTACACGGTAGGTTCGTGAACAAGCCCCGGAGTACATCTCCTTTGAACTAGGAGACCCCTCCGGTCTTG
```



@A00155:342:HHGFNDSXY:1:2372:5773:26428 2:N:0:GAACCTAG+TCCGCATA  
CAGAGGATACCGTGCTCCACAGCTGTAAGGCTGTGGGCCCAGAGAAGTCGCTCTCTCTCGCCCTCCA  
CATCCCTCTCGGCATTGAGATGACCATAGGCCAGAGGTGAGTCCTTAAGTGGACACAGC

[illegible]

@A00155:342:HHGFNDSXY:1:2377:28131:17018 2:N:0:GAACCTAG+TCCGCATA  
AGTACATCTCCTTTGGAAGTACGAGACCCCTCCGGTCTTGTCCAACCTCTGTTTCGGCAGAGGATAACC  
GTGCACCACAGCTGTAAGGCTGTGGGCCCGAGAGAAGTCGCTCTCTCTCGCCCTCCACATCCCTCTCG  
+  
FFFFFFFFFFFFFF:FFFFFFFFFFFFFFF:FFFFFFFFFFFFFF:FFF  
FFFFFFFFFFFFFF:FFFFFFFFFFFFFFF:FFFFFFFFFFFFFFF:FFF  
@A00155:342:HHGFNDSXY:1:2377:24623:18865 2:N:0:GAACCTAG+TCCGCATA  
AAGGACTCTCCTCTGGCCTATGGTCATCTCAATGCCGAGAGGGATGTGGAGGGCGAGAGAGAGCGACT  
TCTCTCGGGCCACAGCCTTACAGCTGTGGAGCACGGTATCCTCTGCCGAAACAGAGGTTGGACAAGA  
+  
FFF:FFF,FFFF:FF:FFF:FFF:FFFFFF:FFFFFFFFFFFFFF,FFFFFFFFFFFFFF  
FFFFFFFFFFFFFF:FFF:FFFFFFFFFFFFFF:FFFFFFFF:F,F:FFFF  
@A00155:342:HHGFNDSXY:1:2377:9236:21527 2:N:0:GAACCTAG+TCCGCATA  
TCGGCAGAGGATAACCGTGCTCCACAGCTGTAAGGCTGTGGGCCCGAGAGAAGTCGCTCTCTCTCGCCC  
TCCACATCCCTCTCGGCATTGAGATGACCATAGGCCAGAGGTGAGTCCTTAAGTGGACACAGCTGATC  
+  
FFFFFFFFFFFFFFFFFFFFFFFFFFFFFFFFFFFFFFFFFFFFFFFFFFFFFFFFFFFFFFFF  
FFFFFFFFFFFFFFFFFFFFFFFFFFFFFFFFFFFFFFFFFFFFFFFFFFFFFFFFFFFFFFFF  
@A00155:342:HHGFNDSXY:1:2378:29622:4225 2:N:0:GAACCTAG+TCCGCATA  
GCCTACTAGACTACGACTTACACGGTAGGTCGTGAACAAGCCCGAGTACATCTCCTTTGGAAGTACG  
AGACCCCTCCGGTCTTGTCCAACCTCTGTTTCGGCAGAGGATACCGTGCTCCACAGCTGTAAGGCTGT  
+  
F:FFFFFFFFFFFFFFFFFFFFFFFFFFFFFFFF:FFFFFFFFFFFFFFFF:F,FFF  
FFFFFFFFFFFFFF:FFFFFFFFFFFFFFFFFFFFFFFFFFFFFFFF,FFFFFF  
@A00155:342:HHGFNDSXY:1:2378:7401:6699 2:N:0:GAACCTAG+TCCGCATA  
GTCATGGGGTTCAAACCCATGCCCGCCACACCGCCTTAGATCAGCTGTGTCCACTTAAGGACTCAC  
CTCTGGCCTATGGTCATCTCAATGCCGAGAGGGATGTGGAGGGCGAGAGAGAGCGACTTCTCTCGGGC  
+  
FFFFFF:FFF,FFFFFFFF:FFFFFFFFFFFFFFFFFFFFFFFF:FFFFFFFFFFFFFF  
FFFFFFFFFFFFFF,:FF:FFFF,FFFFFFFF,FFF,,FFFFFFFFFFFFFF,FFFF  
@A00155:342:HHGFNDSXY:1:2378:2989:10770 2:N:0:GAACCTAG+TCCGCATA  
AGCCTACTAGACTACGACTTACACGGTAGGTCGTGAACAAGCCCGAGTACATCTCCTTTGGAAGTACG  
GAGACCCCTCCGGTCTTGTCCAACCTCTGTTTCGGCAGAGGATACCGTGCTCCACAGCTGTAAGGCTG  
+  
FFFFFFFFFFFFFFFFFFFFFFFFFFFFFFFF:FFFFFFFFFFFFFFFFFFFFFFFFFFFFFFFF  
FFFFFFFFFFFFFFFFFFFFFFFFFFFFFFFFFFFFFFFFFFFFFFFFFFFFFFFF:FFFFFFFF  
@A00155:342:HHGFNDSXY:1:2378:5981:24158 2:N:0:GAACCTAG+TCCGCATA  
TACATCTCCTTTGGAAGTACGAGACCCCTCCGGTCTTGTCCAACCTCTGTTTCGGCAGAGGATACCGT  
GCTCCACAGCTGTAAGGCTGTGGGCCCGAGAGAAGTCGCTCTCTCTCGCCCTCCACATCCCTCTCGGC  
+  
,FFFFFFFFFFFFFFFFFFFFFFFFFFFFFFFF,FFFFFFFFFFFFFFFF  
FFFFFFFFFFFFFFFF:FFFFFFFFFFFFFFFFFFFFFFFFFFFFFFFFFFFFFFFF  
@A00155:342:HHGFNDSXY:1:2378:12961:32769 2:N:0:GAACCTAG+TCCGCATA  
AGGACGAAACCGTCGTTACTCTTGGAGTTGTGTAAGTTTCGTCCTAAAAAGGACTCGTCAGGTAGCCT  
ACTAGACTACGACTTACACGGTAGGTCGTGAACAAGCCCGAGTACATCTCCTTTGGAAGTACGAGAC  
+  
FFFFFFFFFFFFFFFFFFFFFFFFFFFFFFFF:FFFFFFFFFFFFFFFFFFFFFFFF  
FFFFFFFFFFFFFFFFFFFFFFFFFFFFFFFFFFFFFFFFFFFFFFFFFFFFFFFF  
@A00155:342:HHGFNDSXY:1:2401:16215:5744 2:N:0:GAACCTAG+TCCGCATA  
TCTTCGAGTTGTGTAAGTTTCGTCCTAAAAAGGACTCGTCAGGTAGCCTACTAGACTACGACTTACAC  
GGTAGGTCGTGAACAAGCCCGAGTACATCTCCTTTGGAAGTACGAGACCCCTCCGGTCTTGTCCAAC  
+  
FFFFFFFFFFFFFFFFFFFFFFFFFFFFFFFF,,F::,F:FFFF,FF:FFFFFFFFFFFFFF  
:FFFFFFFF:FFFF::F:FFFFFFFFFFFFFFFF,FFFFFFFF,FFFF:FFFF

[illegible]

[illegible]

[illegible]

@A00155:342:HHGFNDSXY:1:2408:1570:11068 2:N:0:GAACCTAG+TCCGCATA  
 AAAAGGACTCATCAGGTAGCCTACTAGACTACGACTTACACGGTAGGTCGTGAACAAGCCCGGAGTAC  
 ATCTCCTTTTGGAACTAGGAGACCCCTCCGGTCTTGTCCAACCTCTGTTTCGGCAGAGGATACCGTGCT  
 +  
 FFF::F:FFFFFFFFFFFFFFFFFFFFFFFFFFFFFFFFFFFFFFFFFFFFFFFFFFFFFFFFFFFFFFFFF:FF:FFFF:FFFFFFF  
 FF::FFFFFF:FFFFFFF,FFFF,FFFFFFFFFFFFFFFFFFFFFFFFF,F:FFF,FFFFFFFFF,FFFFFFF  
 @A00155:342:HHGFNDSXY:1:2408:30969:27289 2:N:0:GAACCTAG+TCCGCATA  
 AGCCCGGAGTACATCTCCTTTGGAAGTACGAGACCCCTCCGGTCTTGTCCAACCTCTGTTTCGGCAGA  
 GGATACCGTGCTCCACAGCTGTAAGGCTGTGGGCCCGAGAGAAGTCGCTCTCTCTCGCC  
 +  
 FFFFFFFFFFFFFFFFFFFFFF:FFFFFFFF,FFFFFFFFFFFFFFFFFFFFFFFFFFFFFFFFFFFFFFFFF:FFFFFFFFFFFFFFFFFFFFFFFFF  
 FFF,FFFFFFFFFFFFFFFFFFFFF::FF,FFFFFFFFFFFFFFFFF:FFF:FFFFFFFFFFFFFFFFF  
 @A00155:342:HHGFNDSXY:1:2408:3622:30780 2:N:0:GAACCTAG+TCCGCATA  
 ACGGTAGGTCGTGAACAAGCCCGGAGTACATCTCCTTTGGAAGTACGAGACCCCTCCGGTCTTGTCCA  
 ACCTCTGTTTCGGCAGAGGATACCGTGCTCCACAGCTGTAAGGCTGTGGGCCCGAGAGAAGTCGCTCT  
 +  
 FFF:FFFFFFFFFFFFFFFFFFFFF:FFFFFFFFFFFFFFFFFFFFFFFFFFFFFFFFFFFFFFFFFFFFFFFFF  
 FFFFFFFFFFFFFF:FFFFFFFFFFFFFFFFFFFFFFFFF:FFFFFFFFFFFFF::FFF:FFFFFFFFFFFFFFFFF  
 @A00155:342:HHGFNDSXY:1:2408:17454:35321 2:N:0:GAACCTAG+TCCGCATA  
 AAAAGGACTCGTCAGGTAGCCTACTAGACTACGACTTACACGGTAGGTCGTGAACAAGCCCGGAGTAC  
 ATCTCCTTTTGGAACTAGGAGACCCCTCCGGTCTTGTCCAACCTCTGTTTCGGCAGAGGATACCGTGCT  
 +  
 FFFFFFFFFFFFFFFFFFFFFF:FFFFFFFFFFFFFFFFFFFFFFFFFFFFFFFFFFFFFFFFFFFFFFFFF:FF:F:FFFFFFF  
 :FFFFFFF:F,FF,F:FFFFFFF:FFFFFFFFFFFFFFFFF:FFFF:FFFFFFFFFFFFFFFFF:FFFFFFFFF  
 @A00155:342:HHGFNDSXY:1:2408:21667:35822 2:N:0:GAACCTAG+TCCGCATA  
 ACGACTTACACGGTAGGTCGTGAACAAGCCCGGAGTACATCTCCTTTGGAAGTACGAGACCCCTCCGG  
 TCTTGTCCAACCTCTGTTTCGGCAGAGGATACCGTGCTCCACAGCTGTAAGGCTGTGGGCCCGAGAGA  
 +  
 FFFFFF:FFFFFFFFFFFFF:FFFFFFFFF:FFFFFFFFFFFFFFFFFFFFFFFFFFFFFFFFFFFFFFFFF  
 FFFFFFFFFFFFFFFFFF:FFF,FFFFFFFFFFFFFFFFF:FFFFF:FFFF:FFF,FFFFFFFFFFFFFFFFF  
 @A00155:342:HHGFNDSXY:1:2408:17924:35947 2:N:0:GAACCTAG+TCCGCATA  
 GTGAACAAGCCCGGAGTACATCTCCTTTGGAAGTACGAGACCCCTCCGGTCTTGTCCAACCTCTGTTT  
 CGGCAGAGGATACCGTGCTCCACAGCTGTAAGGCTGTGGGCCCGAGAGAAGTCGCTCTCTCTCGCCC  
 +  
 FFFFFFFFFFFFFFFFFFFFFF:FFFFFFFFFFFFFFFFFFFFFFFFFFFFFFFFFFFFFFFFFFFFFFFFF  
 FFFFFFFFFFFFFF,FFFFFFFFFFFFFFFFFFFFFFFFFFFFFFFFFFFFFFFFF:FFFFFFFFFFFFFFFFFFFFFFFFF  
 @A00155:342:HHGFNDSXY:1:2409:28447:15843 2:N:0:GAACCTAG+TCCGCATA  
 TCTTCGAGTTGTGTAAGTTTCGTCTAAAAAGGACTCGTCAGGTAGCCTACTAGACTACGACTTACAC  
 GGTAGGTCGTGAACAAGCCCGGAGTACATCTCCTTTGGAAGTACGAGACCCCTCCGGTCTTGTCCAAC  
 +  
 FFFFFFFFFFFFFFFFFFFFFF:FFFFFFFFFFFFFFFFFFFFFFFFFFFFFFFFFFFFFFFFFFFFFFFFF  
 FFFFFFFFFFFFFFFFFF:FFFFFFFFFFFFF,FFFFFFFFFFFFFFFFFFFFFFFFFFFFFFFFF  
 @A00155:342:HHGFNDSXY:1:2410:21630:16720 2:N:0:GAACCTAG+TCCGCATA  
 GAACTAGGAGACCCCTCCGGTCTTGTCCAACCTCTGTTTCGGCAGAGGATACCGTGCTCCACAGCTGT  
 AAGGCTGTGGGCCCGAGAGAAGTCGCTCTCTCTCGCCCTCCACATCCCTCTCGGCATTGAGATGAC  
 +  
 FFFFFFFFFFFFFFFFFFFFFF:FFFFFFFFFFFFFFFFFFFFFFFFFFFFFFFFFFFFFFFFF  
 FFFFFFFFFFFFFFFFFF:FFFFFFFFFFFFF  
 @A00155:342:HHGFNDSXY:1:2410:12264:19820 2:N:0:GAACCTAG+TCCGCATA  
 CTACTAGACTACGACTTACACGGTAGGTCGTGAACAAGCCCGGAGTACATCTCCTTTGGAAGTACGAG  
 ACCCTCCGGTCTTGTCCAACCTCTGTTTCGGCAGAGGATACCGTGCTCCACAGCTGTAAGGCTGTGG  
 +  
 FFFFFFFFFFFFFFFFFFFFFF:FFF  
 FFFFFFFFFFFFFFFFFF:FFFFFFFFFFFFFFFFFFFFFFFFF

[illegible]



@A00155:342:HHGFNDSXY:1:2412:24668:29590 2:N:0:GAACCTAG+TCCGCATA  
GTGTAAGTTTCGTCTCTAAAAAGGACTCGTCAGGTAGCCTACTAGACTACGACTTACACGGTAGGTCGT  
GAACAAGCCCGGAGTACATCTCCTTTGGAAGTAGGAGACCCCTCCGGTCTTGTCCAACCTCTGTTTCG  
+  
FFFFFFFFF:FFFFFFFFFFFFFFFFFFFFFFFFFFFFFFFFFFFFFFFFFFFFFFFFFFFFFFFFFFFFFFFFF:FFF  
FFFFFF:FFFFFFFFFFFFFFFF:FFFFFFFF:FFFFFFFFFFFFFFFFFFFFFFFFFFFFFFFFFFFFFFFFF  
@A00155:342:HHGFNDSXY:1:2413:28293:3145 2:N:0:GAACCTAG+TCCGCATA  
CCCCTCCGGTCTTGTCCAACCTCTGTTTCGGCAGAGGATACCGTGCTCCACAGCTGTAAGGCTGTGGG  
CCCGAGAGAAGTCGCTCTCTCTCGCCCTTCACATCCCTCTCGGCATTGAGATGACCATAGGCCAGAGG  
+  
FFFFFFFFFFFFFFFFFFFFFFFFF:F:FFF:FFFFFFFF:FF:FFF:FFFFF:FFF  
FFFFFFFFF:FFFFFFFFFFFFFFFF:FFFF:FFFF:FF:FFF:FFF:FFFFFFFFF,F:FFFF:F:  
@A00155:342:HHGFNDSXY:1:2413:10474:13463 2:N:0:GAACCTAG+TCCGCATA  
GTTTCGTCTCTAAAAAGGACTCGTCAGGTAGCCTACTAGACTACGACTTACACGGTAGGTCGTGAACAA  
GCCCCGAGTACATCTCCTTTGGAAGTAGGAGACCCCTCCGGTCTTGTCCAACCTCTGTTTCGGCAGAG  
+  
FFFFFFFFFFFF:FFFFFFFFFFFFFFFFFFFFFFFFFFFFFFFFFFFFFFFFFFFFFFFFFFFFFFFFFFFFF  
FFFFFFFFFFFFFFFFFFFFFFFFFFFFFFFFFFFFFFFFFFFFFFFFFFFFFFFFFFFFFFFFFFFFFFFFFFFF  
@A00155:342:HHGFNDSXY:1:2413:19199:19742 2:N:0:GAACCTAG+TCCGCATA  
CCTACTAGACTACGACTTACACGGTAGGTCGTGAACAAGCCCGGAGTACATCTCCTTTGGAAGTAGGA  
GACCCCTCCGGTCTTGTCCAACCTCTGTTTCGGCAGAGGATACCGTGCTCCACAGCTGTAAGGCTGTG  
+  
FFFFFFFFFFFFFFFFFFFFFFFFFFFFFFFFFFFFFFFFFFFFFFFFFFFFFFFFFFFFFFFFFFFFFFFFFFFF  
FFFFFFFFFFFFFFFFFFFFFFFFFFFFFFFFFFFFFFFFFFFFFFFFFFFFFFFFFFFFFFFFFFFFFFFFFFFF:FFFFFFFFFFFF  
@A00155:342:HHGFNDSXY:1:2413:28239:21371 2:N:0:GAACCTAG+TCCGCATA  
AAGGACGAAACCGTCGTTACTCTTTGAGTTGTGTAAGTTTCGTCTCTAAAAAGGACTCGTCAGGTAGCC  
TACTAGACTACGACTTACACGGTAGGTCGTGAACAAGCCCGGAGTACATCTCCTTTGGAAGTAGGAGA  
+  
FFFFFFFFFFFFFFFFFFFFFFFFFFFF:,FFFFFFFFFFFFFFFFFFFFFFFFFFFF:FFFFFFFFFFFF:FFFF,FFF  
FFFFFFFFFFFFFFFFFFFFFFFFFFFFFFFFFFFFFFFFFFFFFFFFFFFFFFFFFFFFFFFFFFFFFFFFFFFF,FFFFF  
@A00155:342:HHGFNDSXY:1:2413:3441:26209 2:N:0:GAACCTAG+TCCGCATA  
CTACTAGACTACGACTTACACGGTAGGTCGTGAACAAGCCCGGAGTACATCTCCTTTGGAACAGGAG  
ACCCCTCCGGTCTTGTCCAACCTCTGTTTCGGCAGAGGATACCGTGCTCCACAGCTGTAAGGCTGTGG  
+  
FFFFFFFFFFFFFFFFFFFFFFFFFFFFFFFFFFFFFFFFFFFFFFFFFFFFFFFFFFFFFFFFFFFFFFFFFFFF  
FFF,FF,:FFFFFFFFFFFFFFFF:FFFF,FFFFFFFFFFFFFFFF:FF:FFFFFFFFFFFFFFFFFFFF:F,F:  
@A00155:342:HHGFNDSXY:1:2413:4517:27884 2:N:0:GAACCTAG+TCCGCATA  
GCCTACTAGACTACGACTTACACGGTAGGTCGTGAACAAGCCCGGAGTACATCTCCTTTGGAACAGG  
AGACCCCTCCGGTCTTGTCCAACCTCTGTTTCGGCAGAGGATACCGTGCTCCACAGCTGTAAGGCTGT  
+  
FFFFFFFFFFFF:FFFFFFFFFFFFFFFFFFFFFFFFFFFFFFFFFFFFFFFFFFFFFFFFFFFF,FFFFFFFFFFFF  
FFFFFFFFFFFFFFFFFFFF:FFFFFFFFFFFF:FFFFFFFFFFFFFFFFFFFF:FFFFF:FFFFFFFFFFFF:FFFFF  
@A00155:342:HHGFNDSXY:1:2414:23059:16752 2:N:0:GAACCTAG+TCCGCATA  
AGAGAGAGCGACTTCTCTCGGGCCACAGCCTTACAGCTGTGGAGCACGGTATCCTCTGCCGAAACAG  
AGGTTGGACAAGACCGGAGGGGTCTCCTAGTTCCAAAGGAGATGTACTCCGGGCTTGTTCACGACCTA  
+  
FFFFFFFFFFFFFFFFFFFFFFFFFFFFFFFFFFFFFFFFFFFFFFFFFFFF:FFFF:, :FFFFFFF:FF:FFFF  
FFFFFFFFFF,FFFF:FFFF:FFF,FFF,FF:F:FFFFFFFF:F:FFF:FF:FFFFFFFFFFFFFFFFFFFF:  
@A00155:342:HHGFNDSXY:1:2414:32045:20290 2:N:0:GAACCTAG+TCCGCATA  
AAAAGGACTCGTCAGGTAGCCTACTAGACTACGACTTACACGGTAGGTCGTGAACAAGTCCGGAGTAC  
ATCTCCTTTGGAAGTAGGAGACCCCTCCGGTCTTGTCCAACCTCTGTTTCGGCAGAGGATACCGTGCT  
+  
FFFFFFFFFFFFFFFFF:FFFFFFFFFFFFFFFFFFFFFFFFFFFFFFFFFFFFFFFFFFFFFFFFFFFFFFFFFFFF  
FFFFFFFFFFFFFFFFFFFFFFFFFFFF:FFFFFFFFFFFF,FFFFFFFFF:FFFFFFFFF:FFFFFFFFF

[illegible]

[illegible]

@A00155:342:HHGFNDSXY:1:2422:28275:10692 2:N:0:GAACCTAG+TCCGCATA  
GTTCCAAGGACGAAACCGTCGTACTCTTCGAGTTGTGTAAGTTTTCGTCCTAAAAAGGACTCGTCAGG  
TAGCCTACTAGACTACGACTTACACGGTAGGTCTGTAACAAGCCCGGAGTACATCTCCTTTGGA ACTA  
+  
FFFF:FFFFFFFFFFFFFF:FFFFFFFFFFFFFF:FFFF,FFFFFFFFFFFFFFFFFFFF,F:FFFFFFFFFFFFFFFFFFFF  
FFFFFFFF:FFFFFFF,:FFFF:FFF:F:FFFFFFFFFFFFFFFFFFFF,FF:FFFFFFFFFFFF,FF::FFFFFFFF  
@A00155:342:HHGFNDSXY:1:2422:27082:15076 2:N:0:GAACCTAG+TCCGCATA  
TAGACTACGACTTACACGGTAGGTCTGTAACAAGCCCGGAGTACATCTCCTTTGGAACCAGGAGACCC  
CTCCGGTCTTGTTCAACCTCTGTTTCGGCAGAGGATACCGTGCTCCACAGCTGTAAGGCTGTGGGCC  
+  
FFFFFFFFFFFFFFFFFFFFFFFFFFFFFFFFFFFFFFFFFFFFFFFFFFFFFFFFFFFFFFFFFFFFFFFFFFFF  
FFFFFFFFFFFFFF:FFFFFFFFFFFFFFFFFFFFFF:FFFFFFFFFFFFFFFFFFFFFFFFFFFFFFFFFFFFFF:FFFFFFFF  
@A00155:342:HHGFNDSXY:1:2422:26304:29857 2:N:0:GAACCTAG+TCCGCATA  
AGCCTACTAGACTACGACTTACACGGTAGGTCTGTAACAAGCCCGGAGTACATCTCCTTTGGA ACTAG  
GAGACCCCTCCGGTCTTGTTCAACCTCTGTTTCGGCAGAGGATACCGTGCTCCACAGCTGTAAGGCTGT  
+  
FFFFFFFFFFFFFFFFFFFFFF:FFF:FFFFFFFFFFFFFFFFFFFFFFFFFFFFFFFFFFFFFFFFFFFFFFFFFFFF  
FFFFFFFFFFFFFFFFFFFFFFFFFFFFFFFFFFFF,FFFFFFFFFFFFFFFFFFFFFFFFFFFFFFFFFFFFFFFFFFFF  
@A00155:342:HHGFNDSXY:1:2423:9471:2550 2:N:0:GAACCTAG+TCCGCATA  
GACCCCTCCGGTCTTGTTCAACCTCTGTTTCGGCAGAGGATACCGTGCTCCACAGCTGTAAGGCTGTG  
GGCCCCGAGAGAAGTCGCTCTCTCTCGCCCTCCACATCCCTCTCGGCATTGAGATGACCATAGGC  
+  
FFFFFFFFFFFFFFF:FFFFFFFFFFFFFFFFFFFFFFFFFFFFFFFFFFFFFFFFFFFFFFFFFFFFFFFFFFFF  
FFFFFFFFFFFFFFFFFFFFFFFFFFFFFFFFFFFFFFFFFFFFFFFFFFFFFFFFFFFFFFFFFFFFFFFFFFFF  
@A00155:342:HHGFNDSXY:1:2424:12373:12931 2:N:0:GAACCTAG+TCCGCATA  
TACTCTTAGAGTTGTGTAAGTTTCGTCCTAAAAAGGACTCGTCAGGTAGCCTACTAGACTACGACTTA  
CACGGTAGGTCTGTAACAAGCCCGGAGTACATCTCCTTTGGA ACTAGGAGACCCCTCCGGTCTTGTC  
+  
FFFFFFFFFFFFFFFFFFFFFFF:FFFFFFFFFFFFFFFFFFFFFFFFFFFFFFFFFFFFFFFFFFFFFFFFFFFF  
FFFFF:FFFFFFFFFFFFFFFFFFFFFFFFFFFFFFFFFFFFFFFFFFFFFFFFFFFFFFFFFFFFFFFFFFFFF,:FFF  
@A00155:342:HHGFNDSXY:1:2424:12445:14434 2:N:0:GAACCTAG+TCCGCATA  
TACTCTTAGAGTTGTGTAAGTTTCGTCCTAAAAAGGACTCGTCAGGTAGCCTACTAGACTACGACTTA  
CACGGTAGGTCTGTAACAAGCCCGGAGTACATCTCCTTTGGA ACTAGGAGACCCCTCCGGTCTTGTC  
+  
FFFFFFFFFFFFFFFFFFFFFFFFFFFFFFFFFFFFFFFFFFFFFFFFFFFFFFFFFFFFFFFFFFFFFFFFFFFF  
FFFFF:FFFFFFFFFFFFFFFFFFFFFFFFFFFFFFFFFFFFFFFFFFFFFFFFFFFFF,FFFFFFFFFFFFFFF:FFFF  
@A00155:342:HHGFNDSXY:1:2424:10086:18709 2:N:0:GAACCTAG+TCCGCATA  
GACCCCTCCGGTCTTGTTCAACCTCTGTTTCGGCAGAGGATACCGTGCTCCACAGCTGTAAGGCTGTG  
GGCCCCGAGAGAAGTCGCTCTCTCTCGCCCTCCACATCCCTCTCGGCATTGAGATGACCATAGGC  
+  
FFFFFFFFFFFFFFFFFFFFFFFFFFFFFFFFFFFFFFFFFFFFFFFFFFFFFFFFFFFFFFFFFFFFFFFFFFFF  
FFFFFFFFFFFFF:FFFFFFFFFFFFFFFFFFFFFFFFFFFFFFFFFFFFFFFFFFFFFFFFFFFFF:FFFFFFF,FFFFFFF  
@A00155:342:HHGFNDSXY:1:2425:27389:21245 2:N:0:GAACCTAG+TCCGCATA  
GGATACCGTGCTCCACAGCTGTAAGGCTGTGGGCCCGAGAGAAGTCGCTCTCTCTCGCCCTTCACATC  
CTCTCTCGGCATTGAGATGACCATAGGCCAGAGGTGAGTCCTTAAGTGACACAGCTGATCTAAGGCGG  
+  
FFFFFFFFFFFFFFFFFFFFFFFFFFFFFFFFFFFFFFFFFFFFFFFFFFFFFFFFFFFFFFFFFFFFFFFFFFFF  
FFFFF:FFFFFFFFFFFFFFFFFFFFFFFFFFFFFFFFFFFFFFFFFFFFFFFFFFFFFFFFFFFFFFFFFFFFF:  
@A00155:342:HHGFNDSXY:1:2425:5475:29230 2:N:0:GAACCTAG+TCCGCATA  
GTGAACAAGTCCGGAGTACATCTCCTTTGGA ACTAGGAGACCCCTCCGGTCTTGTTCAACCTCTGTTT  
CGGCAGAGGATACCGTGCTCCACAGCTGTAAGGCTGTGGGCCCGAGAGAAGTCGCTCTCTCTCGCCCT  
+  
FFFFFFFFFFFFFFFFFFFFFFFFFFFFFFFFFFFFF:FFFFF:FFFFFFFFFFFFFFFFFFFFFFFFF,FFFFFFFFFFFFF:FFF  
FFFFFFFFFFFFFFFFFFFFFFFFFFFFFFFFFFFFFFFFFFFFFFFFFFFFFFFFFFFFFFFFFFFFFFFFFFFFF,  
:FFFFFFFFFFFF,FFFFFFFFFFFFFFFFFFFFFFFFFFFFFFFF

@A00155:342:HHGFNDSXY:1:2426:20491:19163 2:N:0:GAACCTAG+TCCGCATA  
TTAGCCTACTAGACTACGACTTACACGGTAGGTCGTGAACAAGCCCGGAGTACATCTCCTTTGGAAC  
AGGAGACCCCTCCGGTCTTGTCCAACCTCTGTTTCGGCAGAGGATACCGTGCTCCACAGCTGTAAGGC  
+  
FFFFFFFF:FFFFFFFFFFFFFFFFFFFFFFFFFFFFFFFFFFFFFFFFFFFFFFFFFFFFFFFFFFFFFFFF  
FFFFFFFFFFFFFFFFFFFFFFFF:FFFFFFFFFFFFFFFFFFFFFFFF:FFFFFFFFFFFFFFFF:FFFFFFF  
@A00155:342:HHGFNDSXY:1:2426:14208:26537 2:N:0:GAACCTAG+TCCGCATA  
AGGACGAAACCGTCGTTACTCTTCGAGTTGTGTAAGTTTCGTCCTAAAAAGGACTCGTCAGGTAGCCT  
ACTAGACTACGACTTACACGGTAGGTCGTGAACAAGCCCGGAGTACATCTCCTTTGGAACCTAGGAGAC  
+  
FFFFFFFFFFFFFFFFFFFFFFFFFFFFFFFFFFFFFFFFFFFFFFFFFFFFFFFFFFFFFFFFFFFFFFFF  
FFFFFFFFFFFFFFFFFFFFFFFFFFFFFFFFFFFFFFFFFFFFFFFFFFFFFFFFFFFFFFFF:FFFFFFFF  
@A00155:342:HHGFNDSXY:1:2426:14163:26522 2:N:0:GAACCTAG+TCCGCATA  
AGGACGAAACCGTCGTTACTCTTCGAGTTGTGTAAGTTTCGTCCTAAAAAGGACTCGTCAGGTAGCCT  
ACTAGACTACGACTTACACGGTAGGTCGTGAACAAGCCCGGAGTACATCTCCTTTGGAACCTAGGAGAC  
+  
FFFFFFFFFFFFFFFFFFFFFFFFFFFFFFFFFFFFFFFFFFFFFFFFFFFFFFFFFFFFFFFFFFFFFFFF  
FFFFFFFFFFFFFFFFFFFFFFFFFFFFFFFFFFFFFFFFFFFFFFFFFFFFFFFFFFFFFFFF:FFFFFFFF:FFF:FF  
@A00155:342:HHGFNDSXY:1:2426:19623:30248 2:N:0:GAACCTAG+TCCGCATA  
GACGAAACCGTCGTTACTCTTTGAGTTGTGTAAGTTTCGTCCTAAAAAGGACTCGTCAGGTAGCCTAC  
TAGACTACGACTTACACGGTAGGTCGTGAACAAGCCCGGAGTACATCTCCTTTGGAACCTAGGAGACCC  
+  
FFFFFFFFFFFFFFFFFFFFFFFF,FFFFFFFFFFFFFFFFFFFFFFFFFFFFFFFFFFFFFFFFFFFFFFFF  
FFFFFFFFFFFFFFFFFFFFFFFFFFFFFFFF:FFFF:,FFFFFFFFFFFFFFFFFFFFFFFFFFFFFFFF  
@A00155:342:HHGFNDSXY:1:2427:9308:1548 2:N:0:GAACCTAG+TCCGCATA  
TCCTAAAAAGGACTCGTCAGGTAGCCTACTAGACTACGACTTACACGGTAGGTCGTGAACAAGCCCGG  
AGTACATCTCCTTTGGAACCTAGGAGACCCCTCCGGTCTTGTCCAACCTCTGTTTCGGCAGAGGATAACC  
+  
FFFFFFFFFFFFFFFFFFFFFFFFFFFFFFFFFFFFFFFFFFFFFFFFFFFFFFFFFFFFFFFFFFFFFFFF  
FFFFFFFFFFFFFFFFFFFFFFFFFFFFFFFFFFFFFFFFFFFFFFFFFFFFFFFFFFFFFFFF:FFFFFFFF:FFF  
@A00155:342:HHGFNDSXY:1:2427:27190:2926 2:N:0:GAACCTAG+TCCGCATA  
TCCTTTGGAACCTAGGAGACCCCTCCGGTCTTGTCCAACCTCTGTTTCGGCAGAGGATACCGTGCTCCA  
CAGCTGTAAGGCTGTGGGCCCGAGAGAAGTCGCTCTCTCTCGCCCTCCACATCCCTCTCGG  
+  
:FF,F:FFF,FFFFFFFFFFFFFFFFFFFFFFFF:FFF,FF,FFFFFFFF:FFFFFFFFFFFFFFFF,FFFFFFFF  
FFFFFFFFFFFFFFFF:FFFFFF:FFFFFFFF:FFFFFFFF,FFFFFFFFFFFFFFFF:FFFFFFFF  
@A00155:342:HHGFNDSXY:1:2427:5168:9565 2:N:0:GAACCTAG+TCCGCATA  
TAGGAGACCCCTCCGGTCTTGTCCAACCTCTGTTTCGGCAGAGGATACCGTGCTCCACAGCTGTAAGG  
CTGTGGGCCCGAGAGAAGTCGCTCTCTCTCGCCCTCCACATCCCTCTCGGCATTGAGATGACCATAGG  
+  
FFFFFFFFFFFFFFFFFFFFFFFFFFFFFFFFFFFFFFFFFFFFFFFFFFFFFFFFFFFFFFFFFFFFFFFF  
FFFFFFFFFFFF:FFFFFFFFFFFFFFFFFFFFFFFFFFFFFFFFFFFFFFFFFFFFFFFF:FFFFFFFFF:,FF  
@A00155:342:HHGFNDSXY:1:2427:5077:11725 2:N:0:GAACCTAG+TCCGCATA  
TAGGAGACCCCTCCGGTCTTGTCCAACCTCTGTTTCGGCAGAGGATACCGTGCTCCACAGCTGTAAGG  
CTGTGGGCCCGAGAGAAGTCGCTCTCTCTCGCCCTCCACATCCCTCTCGGCATTGAGATGACCATAGG  
+  
FFFFFFFFFFFFFFFFFFFFFFFFFFFFFFFFFFFFFFFFFFFFFFFFFFFFFFFFFFFFFFFFFFFFFFFF,FFFFF:FFFFFFF  
FFFFFF,FFFFFFF:FFFFFFFFFFFFFFFFFFFFFFFFFFFFFFFFFFFFFFFFFFFFFFFF:FFFFF:FFFFF:  
@A00155:342:HHGFNDSXY:1:2427:6813:23625 2:N:0:GAACCTAG+TCCGCATA  
AGGACGAAACCGTCGTTACTCCTCGAGTTGTGTAAGTTTCGTCCTAAAAAGGACTCGTCAGGTAGCCT  
ACTAGACTACGACTTACACGGTAGGTCGTGAACAAGCCCGGAGTACATCTCCTTTGGAACCTAGGAGAC  
+  
FFF:FFFF:FFFFFFFFFFFF,FFFFFFFFF:FFF,:FF:FFFF:FFFFFFFFFFFFFFFFFFFF,FFFFFFFF  
FFF,:FF,FFFFFFFFF:F,FFFFFFFFFFFFFFFFFFFFFFFF:FFFFF:FF:FFF,FFF:FFF,:F,FFFF

@A00155:342:HHGFNDSXY:1:2427:26494:23672 2:N:0:GAACCTAG+TCCGCATA  
GACCCCTCCGGTCTTGTCCAACCTCTGTTTCGGCAGAGGATACCGTGCTCCACAGCTGTAAGGCTGTG  
GGCCCGAGAGAAGTCGCTCTCTCTCGCCCTCCACATCCCTCTCGGCATTGAGATGACCATAGGC

+

FFF,FFFF:FF:FFFFFFFFFFFF,FFF,FFFFFFFF:FFF:,FFF:FF:FFFF::FFF,FFFF:FFF  
FFFF::FFFFFFFF:FF:FF:::FFFFFFFF:FFFFFFFF:FFF:,F:FF:FFF:FFFFFFFF:FF

@A00155:342:HHGFNDSXY:1:2427:3387:35383 2:N:0:GAACCTAG+TCCGCATA  
GTCTTGTCCAACCTCTGTTTCGGCAGAGGATACCGTGCTCCACAGCTGTAAGGCTGTGGGCCCGAGAG  
AAGTCGCTCTCTCTCGCCCTCCACATCCCTCTCGGCATTGAGATGACCATAGGCCAGAG

+

FFFFFFFFFFFFFFFFFFFFFFFFFFFFFFFFFFFFFFFFFFFFFFFFFFFFFFFFFFFFFFFFFFFFFFFF  
F:FFFFFFFFFFFFFFFFFFFFFFFFFFFFFFFFFFFFFFFFFFFFFFFFFFFFFFFFFFFFFFFF:FFFFFFF

@A00155:342:HHGFNDSXY:1:2428:11487:15092 2:N:0:GAACCTAG+TCCGCATA  
TGTGTAAGTTTCGTCTAAAAAGGACTCGTCAGGTAGCCTACTAGACTACGACTTACACGGTAGGTGCG  
TGAACAAGCCCGGAGTACATCTCCTTTGGAAGTAGGAGACCCCTCCGGTCTTGTCCAACCTCTGTTTC

+

:FFFFFFFFFFFFFFFFFFFFFFFFFFFFFFFFFFFFFFFFFFFFFFFFFFFFFFFFFFFFFFFFFFFFFFFF  
FFFFFFFFFFFFFFFFFFFFFFFFFFFFFFFFFFFFFFFFFFFFFFFFFFFFFFFFFFFFFFFF:FFFFFFFF

@A00155:342:HHGFNDSXY:1:2429:14281:7748 2:N:0:GAACCTAG+TCCGCATA  
GGACTCGTCAGGTAGCCTACTAGACTACGACTTACACGGTAGGTGCTGAACAAGCCCGGAGTACATCT  
CCTTTGGAAGTAGGAGACCCCTCCGGTCTTGTCCAACCTCTTTTCGGCAGAGGATACCGTGCTCCAC

+

FFFFFF:FFF,FF,FFFFFFFF,F:FFF,FFF:F:FFFF:FFF,FFFFFF,:FFF:FFFFFFFF  
FFFFFF:FFFFFF,FFF,,FFFFFFFF,,F:FFFF:FFF:F:FF:FFF:FFF,FF,FFFFFF

@A00155:342:HHGFNDSXY:1:2429:22851:10441 2:N:0:GAACCTAG+TCCGCATA  
GTGAACAAGCCCGGAGTACATCTCCTTTGGAAGTAGGAGACCCCTCCGGTCTTGTCCAACCTCTGTTT  
CGGCAGAGGATACCGTGCTCCACAGCTGTAAGGCTGTGGGCCCGAGAGAAGTCGCTCTCTCTCGCCCT

+

FFFFFFFFFFFFFFFFFFFFFFFFFFFFFFFFFFFFFFFFFFFFFFFFFFFFFFFFFFFFFFFFFFFFFFFF  
FFFFFFFFFFFFFFFFFFFFFFFFFFFFFFFFFFFFFFFFFFFFFFFFFFFFFFFFFFFFFFFFFFFFFFFF

@A00155:342:HHGFNDSXY:1:2429:24957:13432 2:N:0:GAACCTAG+TCCGCATA  
GTGAACAAGCCCGGAGTACATCTCCTTTGGAAGTAGGAGACCCCTCCGGTCTTGTCCAACCTCTGTTT  
CGGCAGAGGATACCGTGCTCCACAGCTGTAAGGCTGTGGGCCCGAGAGAAGTCGCTCTCTCTCGCCCT

+

FFFFFFFFFFFFFFFFFFFFFFFFFFFFFFFFFFFFFFFFFFFFFFFFFFFFFFFFFFFFFFFFFFFFFFFF  
FFFFFFFFFFFFFFFFFFFFFFFFFFFFFFFFFFFFFFFFFFFFFFFFFFFFFFFFFFFFFFFFFFFFFFFF

@A00155:342:HHGFNDSXY:1:2429:19849:23156 2:N:0:GAACCTAG+TCCGCATA  
TACACGGTAGGTGCTGAACAAGCCCGGAGTACATCTCCTTTGGAAGTAGGAGACCCCTCCGGTCTTGT  
CCAACCTCTGTTTCGGCAGAGGATACCGTGCTCCACAGCTGTAAGGCTGTGGGCCCGAGAGAAGTCGC

+

FFFFFFFF:FFFFFFFFFFFFFFFFFFFFFFFFFFFFFFFFFFFFFFFFFFFFFFFFFFFFFFFFFFFFFFFF  
F,FFFFFFFF:FFFFFFFFFFFFFFFFFFFFFFFFFFFFFFFFFFFFFFFFFFFFFFFFFFFFFFFFFFFF

@A00155:342:HHGFNDSXY:1:2430:24017:12900 2:N:0:GAACCTAG+TCCGCATA  
AAAAGGACTCGTCAGGTAGCCTACTAGACTACGACTTACACGGTAGGTGCTGAACAAGCCCGGAGTAC  
ATCTCCTTTGGAAGTAGGAGACCCCTCCGGTCTTGTCCAACCTCTGTTTCGGCAGAGGATACCGTGCT

+

FFFFFFFFFFFFFFFFFFFFFFFFFFFFFFFFFFFFFFFFFFFFFFFFFFFFFFFFFFFFFFFFFFFFFFFF  
FFFFFFFFFFFFFFFFFFFFFFFFFFFFFFFFFFFFFFFFFFFFFFFFFFFFFFFFFFFFFFFFFFFFFFFF

@A00155:342:HHGFNDSXY:1:2430:4164:21292 2:N:0:GAACCTAG+TCCGCATA  
GTGTAAGTTTCGTCTAAAAAGGACTCGTCAGGTAGCCTACTAGACTACGACTTACACGGTAGGTGCTG  
GAACAAGCCCGGAGTACATCTCCTTTGGAAGTAGGAGACCCCTCCGGTCTTGTCCAACCTCTGTTTC

+

FFFFFFFFFFFFFFFFFFFFFFFFFFFFFFFFFFFFFFFFFFFFFFFFFFFFFFFFFFFFFFFF:FFFFF:FFFF:FFF:FFFF:FFFFFFFF:FFF:  
FF:FFFFFFFFFFFFFFFF:FFFFFFFFF:FFFFF:FFFFFFFFFFFF:FFFF:FFFFFFFF:FFFF

@A00155:342:HHGFNDSXY:1:2431:30065:15984 2:N:0:GAACCTAG+TCCGCATA  
AAAAGGACTCGTCAGGTAGCCTACTAGACTACGACTTACACGGTAGGTCGTGAACAAGCCCGGAGTAC  
ATCTCCTTTTGGAACTAGGAGACCCCTCCGGTCTTGTCCAACCTCTGTTTCGGCAGAGGATACCGTGCT  
+  
FFFFFFFFFFFFFFFFFFFFFFFFFFFFFFFFFFFFFFFFFFFFFFFFFFFFFFFFFFFFFFFFFFFFFFFFFFFF  
FFFFFFFFFFFFFFFFFFFFFFFF:FFFF:FFFFFFFFFFFFFFFFFFFFFFFFFFFFFFFFFFFFFFFFFFFFFFFF  
@A00155:342:HHGFNDSXY:1:2431:6352:17816 2:N:0:GAACCTAG+TCCGCATA  
TAGGTCGTGAACAAGCCCGGAGTACATCTCCTTTGGAAGTACAGACCCCTCCGGTCTTGTCCAACCT  
CTGTTTCGGCAGAGGATACCGTGCTCCACAGTTGTAAGGCTGTGGGCCCGAGAGAAGTCGCTCTCTCT  
+  
FFFFFFFFFFFFFFFFFFFFFFFFFFFFFFFFFFFFFFFFFFFFFFFFFFFFFFFFFFFFFFFFFFFFFFFFFFFF  
FFFFFFFFFFFFFFFFFFFFFFFFFFFFFFFFFFFFFFFFFFFFFFFFFFFFFFFFFFFFFFFFFFFFFFFFFFFF:FFFFFFFF  
@A00155:342:HHGFNDSXY:1:2431:26684:20087 2:N:0:GAACCTAG+TCCGCATA  
TAGACTACGACTTACACGGTAGGTCGTGAACAAGCCCGGAGTACATCTCCTTTGGAAGTACAGACCC  
CTCCGGTCTTGTCCAACCTCTGTTTCGGCAGAGGATACCGTGCTCCACAGCTGTAAGGCTGTGGGCC  
+  
FFFFFFFFFFFFFFFFFFFFFFFFFFFFFFFFFFFFFFFFFFFFFFFFFFFFFFFFFFFFFFFFFFFFFFFFFFFF  
FFFFFFFFFFFFFFFFFFFFFFFFFFFFFFFFFFFFFFFFFFFFFFFFFFFFFFFFFFFFFFFFFFFFFFFFFFFF:FFFFFFFF  
@A00155:342:HHGFNDSXY:1:2431:13232:25535 2:N:0:GAACCTAG+TCCGCATA  
TGTTCGGCAGAGGATACCGTGCTCCACAGCTGTAAGGCTGTGGGCCCGAGAGAAGTCGCTCTCTCTC  
GCCCTCCACATCCCTCTCGGCATTGAGATGACCATAGGCCAGAGGTGAGTCCTTAAGTGGACACAGCT  
+  
FFFFFFFFFFFFFFFFFFFFFFFFFFFFFFFFFFFFFFFFFFFFFFFFFFFFFFFFFFFFFFFFFFFFFFFFFFFF  
FFFFFFFFFFFFFFFFFFFFFFFFFFFFFFFFFFFFFFFFFFFFFFFFFFFFFFFFFFFFFFFFFFFFFFFFFFFF:FFFFFFFF  
@A00155:342:HHGFNDSXY:1:2431:20292:30373 2:N:0:GAACCTAG+TCCGCATA  
ACCCCTCCGGTCTTGTCCAACCTCTGTTTCGGCAGAGGATACCGTGCTCCACAGCTGTAAGGCTGTGG  
GCCCGAGAGAAGTCGCTCTCTCTCGCCCTCCACATCCCTCTCGGCATTGAGATGACCATAGGCCAGAG  
+  
FFFFFFFFFFFFFFFFFFFFFFFFFFFFFFFFFFFFFFFFFFFFFFFFFFFFFFFFFFFFFFFFFFFFFFFFFFFF  
FFFFFFFFFFFFFFFFFFFFFFFFFFFFFFFFFFFFFFFFFFFFFFFFFFFFFFFFFFFFFFFFFFFFFFFFFFFF:FFFFFFFF  
@A00155:342:HHGFNDSXY:1:2431:26124:35931 2:N:0:GAACCTAG+TCCGCATA  
ACTAGACTACGACTTACACGGTAGGTCGTGAACAAGCCCGGAGTACATCTCCTTTGGAACCAGGAGAC  
CCCTCCGGTCTTGTCCAACCTCTGTTTCGGCAGAGGATACCGTGCTCCACAGCTGTAAGGCTGTGGGC  
+  
FFFFFFFFFFFFFFFFFFFFFFFFFFFFFFFFFFFFFFFFFFFFFFFFFFFFFFFFFFFFFFFFFFFFFFFFFFFF  
FFFFFFFFFFFFFFFFFFFFFFFFFFFFFFFFFFFFFFFFFFFFFFFFFFFFFFFFFFFFFFFFFFFFFFFFFFFF,F:FFFFFFFF  
FFFFFFFF:FF:FFFFFFFFFFFFFFFFFFFFFFFFFFFFFFFFFFFFFFFFFFFFFFFFFFFFFFFFFFFF,,FFFF:FFFFFFFF  
@A00155:342:HHGFNDSXY:1:2431:26124:35931 2:N:0:GAACCTAG+TCCGCATA  
ACTAGACTACGACTTACACGGTAGGTCGTGAACAAGCCCGGAGTACATCTCCTTTGGAACCAGGAGAC  
CCCTCCGGTCTTGTCCAACCTCTGTTTCGGCAGAGGATACCGTGCTCCACAGCTGTAAGGCTGTGGGC  
+  
FFFFFFFFFFFFFFFFFFFFFFFFFFFFFFFFFFFFFFFFFFFFFFFFFFFFFFFFFFFFFFFFFFFFFFFFFFFF  
FFFFFFFFFFFFFFFFFFFFFFFFFFFFFFFFFFFFFFFFFFFFFFFFFFFFFFFFFFFFFFFFFFFFFFFFFFFF,F:FFFFFFFF  
@A00155:342:HHGFNDSXY:1:2432:16369:4163 2:N:0:GAACCTAG+TCCGCATA  
ACCCCTCCGGTCTTGTCCAACCTCTGTTTCGGCAGAGGATACCGTGCTCCACAGCTGTAAGGCTGTGG  
GCCCGAGAGAAGTCGCTCTCTCTCGCCCTCCACATCCCTCTCGGCATTGAGATGACCATAGGCCAGAG  
+  
FFFFFFFFFFFFFFFFFFFFFFFFFFFFFFFFFFFFFFFFFFFFFFFFFFFFFFFFFFFFFFFFFFFFFFFFFFFF  
FFFFFFFFFFFFFFFFFFFFFFFFFFFFFFFFFFFFFFFFFFFFFFFFFFFFFFFFFFFFFFFFFFFFFFFFFFFF:,FFFFFFFF  
@A00155:342:HHGFNDSXY:1:2432:11749:20807 2:N:0:GAACCTAG+TCCGCATA  
GAGAGCGACTTCTCTCGGGCCACAGCCTTACAGCTGTGGAGCACGGTATCCTCTGCCGAACAGAGG  
TTGGACAAGACCGGAGGGGTCTCCTAGTTCAAAGGAGATGTACTCCGGGCTTGTTCACGACCTACCG  
+  
FFFFFFFFFFFFFFFFFFFFFFFFFFFFFFFFFFFFFFFFFFFFFFFFFFFFFFFFFFFFFFFFFFFFFFFFFFFF  
FFFFFFFFFFFFFFFFFFFFFFFFFFFFFFFFFFFFFFFFFFFFFFFFFFFFFFFFFFFFFFFFFFFFFFFFFFFF:FFFF:FFFF  
@A00155:342:HHGFNDSXY:1:2432:26802:29496 2:N:0:GAACCTAG+TCCGCATA  
AGTACATCTCCTTTGGAAGTACAGACCCCTCCGGTCTTGTCCAACCTCTGTTTCGGCAGAGGATACC  
GTGCTCCACAGCTGTAAGGCTGTGGGCCCGAGAGAAGTCGCTCTCTCTCGCCCTCCACATCCCTCTCG  
+  
FFFFFFFFFFFFFFFFFFFFFFFFFFFFFFFFFFFFFFFFFFFFFFFFFFFFFFFFFFFFFFFFFFFFFFFFFFFF  
FFFFFFFFFFFFFFFFFFFFFFFFFFFFFFFFFFFFFFFFFFFFFFFFFFFFFFFFFFFFFFFFFFFFFFFFFFFF:FFFFFFFF  
@A00155:342:HHGFNDSXY:1:2432:26802:29496 2:N:0:GAACCTAG+TCCGCATA  
AGTACATCTCCTTTGGAAGTACAGACCCCTCCGGTCTTGTCCAACCTCTGTTTCGGCAGAGGATACC  
GTGCTCCACAGCTGTAAGGCTGTGGGCCCGAGAGAAGTCGCTCTCTCTCGCCCTCCACATCCCTCTCG

@A00155:342:HHGFNDSXY:1:2432:3866:33677 2:N:0:GAACCTAG+TCCGCATA  
ACACGGTAGGTCGCGAACAAAGCCCGAGGTACATCTCCTTTGGAAGTACAGAGACCCCTCCGGTCTTGCT  
CAACCTCTGTTTTCGGCAGAGGATACCGTGCTCCACAGCTGTAAGGCTGTGGGCCCGAGAGAAGTCGCT  
+  
FFFFFFFFFFFFFFF,FFFFFFFFFFFFFFFFFFFFFFFFFFFFFFFFFFFFFFFFFFFFFFFFFFFFFFFFFFFFF  
FF:FFFFFFFFFFFFFFF:FFFFFFFFFFFFFFFFFFFFFFFFFFFFFFFFFFFFFFFFFFFFFFFFFFFFFFFFFFFFF,FFFFFFFF:FFF  
@A00155:342:HHGFNDSXY:1:2432:15266:33943 2:N:0:GAACCTAG+TCCGCATA  
GCCTACTAGACTACGACTTACACGGTAGGTCGTGAACAAGCCCGAGTACATCTCCTTTGGAACCAGG  
AGACCCCTCCGGTCTTGTTCCAACCTCTGTTTCGGCAGAGGATACCGTGCTCCACAGCTGTAAGGCTGT  
+  
FFFFFFFFFFFFFFFFFFFFFFFFFFFFFFFFFFFFFFFFFFFFFFFFFFFFFFFFFFFFFFFFFFFFFFFFFFFFF  
FFFFFFFFFFFFFFFFFFFFFFFFFFFFFFFFFFFFFFFFFFFFFFFFFFFFFFFFFFFFFFFFFFFFFFFFFFFFF  
@A00155:342:HHGFNDSXY:1:2433:13819:7764 2:N:0:GAACCTAG+TCCGCATA  
CACGGTAGGTCGTGAACAAGCCCGAGTACATCTCCTTTGGAAGTACAGAGACCCCTCCGGTCTTGTTCC  
AACCTCTGTTTCGGCAGAGGATACCGTGCTCCACAGCTGTAAGGCTGTGGGCCCGAGAGAAGTCGCTC  
+  
FFFFFFFFFFFFFFFFFFFFFFFFFFFFFFFFFFFFFFFFFFFFFFFFFFFFFFFFFFFFFFFFFFFFFFFFFFFFF  
FFFFFFFFFFFFFFFFFFFFFFFFFFFFFFFFFFFFFFFFFFFFFFFFFFFFFFFFFFFFFFFFFFFFFFFFFFFFF  
@A00155:342:HHGFNDSXY:1:2433:17300:13823 2:N:0:GAACCTAG+TCCGCATA  
AAGGACGAAACCGTCGTTACTCTTCGAGTTGTGTAAGTTTCGTCTAAAAAGGACTCGTCAGGTAGCC  
TACTAGACTACGACTTACACGGTAGGTCGTGAACAAGCCCGAGTACATCTCCTTTGGAAGTACAGAG  
+  
FFFFFFFFF,:FFFFFFFFFFFFFFFF:F,FFFF,F,FFFFF:FFFF,FFFFFFFFFFFFFFFF:FFF  
FFF,FFFFFFFFFFFFFFFFFFFFFFFFF,FFFFFFFF:FFFFFFFFFFFFFFFFFFFFFFFFFFFFFFFFFFFFF  
@A00155:342:HHGFNDSXY:1:2434:9914:4820 2:N:0:GAACCTAG+TCCGCATA  
AAAAGGACTCGTCAGGTAGCCTACTAGACTACGACTTACACTGTAGGTCGTGAACAAGCCCGAGTAC  
ATCTCCTTTGGAAGTACAGAGACCCCTCCGGTCTTGTTCCAACCTCTGTTTCGGCAGAGGATACCGTGCT  
+  
FFFFFFFFFFFFFFFFFFFFFFFFFFFFFFFFFFFFFFFFFFFFFFFFFFFFFFFFFFFFFFFFFFFFFFFFFFFFF  
FFFFFFFFFFFFFFFFFFFFFFFFFFFFFFFFFFFFFFFFFFFFFFFFFFFFFFFFFFFFFFFFFFFFFFFFFFFFF  
@A00155:342:HHGFNDSXY:1:2434:8232:10614 2:N:0:GAACCTAG+TCCGCATA  
TCCGTTCCAAGGACGAAACCGTCGTTACTCTTCGAGTTGTGTAAGTTTCGTCTAAAAAGGACTCGTC  
AGGTAGCCTACTAGACTACGACTTACACGGTAGGTCGTGAACAAGCCCGAGTACATCTCCTTTGGAA  
+  
FFFFFFFFFFFFFFFFFFFFFFFFFFFFFFFFFFFFFFFFFFFFFFFFFFFFFFFFFFFFFFFFFFFFFFFFFFFFF  
FFFFFFFFFFFFFFFFFFFFFFFFFFFFFFFFFFFFFFFFFFFFFFFFFFFFFFFFFFFFFFFFFFFFFFFFFFFFF  
@A00155:342:HHGFNDSXY:1:2434:16251:17143 2:N:0:GAACCTAG+TCCGCATA  
CCTACTAGACTACGACTTACACGGTAGGTCGTGAACAAGCCCGAGTACATCTCCTTTGGAAGTACAG  
GACCCCTCCGGTCTTGTTCCAACCTCTGTTTCGGCAGAGGATACCGTGCTCCACAGCTGTAAGGCTGTG  
+  
FFFFFFFFFFFFFFFFFFFFFFFFFFFFFFFFFFFFFFFFFFFFFFFFFFFFFFFFFFFFFFFFFFFFFFFFFFFFF  
FFFFFFFFFFFFFFFFFFFFFFFFFFFFFFFFFFFFFFFFFFFFFFFFFFFFFFFFFFFFFFFFFFFFFFFFFFFFF  
@A00155:342:HHGFNDSXY:1:2434:18638:25128 2:N:0:GAACCTAG+TCCGCATA  
GGACTCGTCAGGTAGCCTACTAGACTACGACTTACACGGTAGGTCGTGAACAAGCCCGAGTACATCT  
CCTTTGGAAGTACAGAGACCCCTCCGGTCTTGTTCCAACCTCTGTTTCGGCAGAGGATACCGTGCTCCAC  
+  
FFFFFFFFFFFFFFFFFFFFFFFFFFFFFFFFFFFFFFFFFFFFFFFFFFFFFFFFFFFFFFFFFFFFFFFFFFFFF  
FFFFFFFFFFFFFFFFFFFFFFFFFFFFFFFFFFFFFFFFFFFFFFFFFFFFFFFFFFFFFFFFFFFFFFFFFFFFF  
@A00155:342:HHGFNDSXY:1:2434:30355:25128 2:N:0:GAACCTAG+TCCGCATA  
ACTCTTTGAGTTGTGTAAGTTTCGTCTAAAAAGGACTCGTCAGGTAGCCTACTAGACTACGACTTAC  
ACGGTAGGTCGTGAACAAGCCCGAGTACATCTCCTTTGGAAGTACAGAGACCCCTCCGGTCTTGTTCCA  
+  
FFFFF:FFFF:FFFFFFFFFFFF:FF:FFFFFFFFFFFF:FFFFFFFFFFFFFFFF:FFFFFFFFFFFF:FF  
FFFFFFFFFFFFFFFFFFFFFFFFFFFFFFFFFFFFFFFFFFFFFFFFFFFFFFFFFFFFFFFFFFFFFFFFFFFFF  
@A00155:342:HHGFNDSXY:1:2434:30355:25128 2:N:0:GAACCTAG+TCCGCATA  
ACTCTTTGAGTTGTGTAAGTTTCGTCTAAAAAGGACTCGTCAGGTAGCCTACTAGACTACGACTTAC  
ACGGTAGGTCGTGAACAAGCCCGAGTACATCTCCTTTGGAAGTACAGAGACCCCTCCGGTCTTGTTCCA





[illegible]

[illegible]

+  
@A00155:342:HHGFNDSXY:1:2442:29640:21762 2:N:0:GAACCTAG+TCCGCATA  
CCCCCTCCGGTCTTGTTCCAACCTCTGTTTCGGCAGAGGATACCGTGCTCCACAGCTGTAAGGCTGTGGG  
CCCAGAGAAGTCGCTCTCTCTCGCCCTCCACATCCCTCTCGGCATTGAGATGACCATAGGCCAGAGG  
+  
FFFFFFFFFFFFFFFF:FF:FFFFFFFFFFFFFFFF:FFFFF:FFFFFFFFFFFFFFFFFFFFFFFFFFFFFFF:FFF  
FFFFFFFFFFFFFFFFFFFFFFFF:FFFFFFFFFFFFFFFFFFFFFFFF,FFFFFFFFFFFF:FFFFFFFFFFFF  
@A00155:342:HHGFNDSXY:1:2442:32850:33489 2:N:0:GAACCTAG+TCCGCATA  
TACGACTTACACGGTAGGTCGTGAACAAGCCCGAGTACATCTCCTTTGGAACGAGGAGACCCCTCCG  
GTCTTGTTCCAACCTCTGTTTCGGCAGAGGATACCGTGCTCCACAGCTGTAAGGCTGTGGGCCCG  
+  
:FFFFFFFFFFFFFFFFFFFFFFFF:FFFFFFFFFFFFFFFFFFFFFFFFFFFFFFFFFFFFFFFF:FFFFFFFFFFFFFFF  
F:FFFFFFFFFFFFFFFFFFFFFFFFFFFFFFFFFFFFFFFF:FFFFFFFFFFFFFFFFFFFFFFFF:F  
@A00155:342:HHGFNDSXY:1:2443:8350:16391 2:N:0:GAACCTAG+TCCGCATA  
CCGTTCCAAGGACGAAACCGTCGTTACTCTACGAGTTGTGTAAGTTTTCGTCCTAAAAAGGACTCGTCA  
GGTAGCCTACTAGACTACGACTTACACGGTAGGTCGTGAACAAGCCCGAGTACATCTCCTTTGGAA  
+  
FFFFFFFFFFFFFFFFFFFFFFFF:FFFFFFFFFFFFFFFFFFFFFFFFFFFFFFFFFFFFFFFFFFFFFFFFFFFFFFF  
FFFFFF,FFFFFFFFFFFFFFFFFFFFFFFFFFFFFFFFFFFFFFFFF:FFFFFFFFFFFFFFF:FFFFFFF  
@A00155:342:HHGFNDSXY:1:2443:11876:27226 2:N:0:GAACCTAG+TCCGCATA  
AACTAGGAGACCCCTCCGGTCTTGTTCCAACCTCTGTTTCGGCAGAGGATACCGTGCTCCACAGCTGTA  
AGGCTGTGGGCCCGAGAGAAGTCGCTCTCTCTCGCCCTCCACATCCCTCTCGGCATTGAGATGACCAT  
+  
FFFFFFFFFFFFFFFFFFFFFFFF:FFFFFFFFFFFFFFF:FFFFFFFFFFFFFFF:FFFFFFFFFFFFFFFFFFFFFFF  
FFFFFFFFFFFFFFFFFFFFFFFFFFFFFFFFFFFFFFFFFFFFFFFFFFFFFFFFFFFFFFFF,FFFFFFFFFFFFFFF  
@A00155:342:HHGFNDSXY:1:2444:13494:27962 2:N:0:GAACCTAG+TCCGCATA  
TAGGTCGTGAACAAGCCCGAGTACATCTCCTTTGGAAGTAGGAGACCCCTCCGGTCTTGTTCCAACCT  
CTGTTTCGGCAGAGGATACCGTGCTCCACAGCTGTAAGGCTGTGGGCCCGAGAGAAGTCGCTCTCTCT  
+  
FFFF:F,:FFFFFFFFFFFFFFF,F:FFFF:FFFF:FFF,:FFFFFFFF:FFFFFFFF:FFFF:FFFF:F  
FFF:FFFF:F,,FFFF,FFF:F:FFF:FFFF::FFFFFFFFFFFFFFFFFFFFFFFF:FFFFFFFFFFFFFFF  
@A00155:342:HHGFNDSXY:1:2444:28664:28244 2:N:0:GAACCTAG+TCCGCATA  
AAAAGGACTCGTCAGGTAGCCTACTAGACTACGACTTACACGGTAGGTCGTGAACAAGCCCGAGTAC  
ATCTCCTTTGGAAGTAGGAGACCCCTCCGGTCTTGTTCCAACCTCTGTTTCGGCAGAGGATACCGTGCT  
+  
:FFFFFFFFFFFFFFFFFFFFFFFFFFFFFFFFFFFFFFFFFFFFFFFFFFFFFFFFFFFFFFFFFFFFFFFFFFFFF  
FFFFFFFFFFFFFFFFFFFFFFFFFFFFFFFFFFFFFFFFFFFFFFFFFFFFFFFFFFFFFFFFFFFFFFFFFFFFFFF  
@A00155:342:HHGFNDSXY:1:2444:32117:30217 2:N:0:GAACCTAG+TCCGCATA  
GAAACCGTCGTTACTCTTTGAGTTGTGTAAGTTTTCGTCCTAAAAAGGACTCGTCAGGTAGCCTACTAG  
ACTACGACTTACACGGTAGGTCGTGAACAAGCCCGAGTACATCTCCTTTGGAAGTAGGAGACCCCTC  
+  
FFFFFFFFFFFFFFFFFFFFFFFF:FFFFFFFFFFFFFFF,FFFFFFFF:FFFFFFFFFFFFFFFFFFFFFFFFFFFFF  
FFFFFFFFFFFFFFFFFFFFFFFFFFFFFFFFFFFFFFFFFFFFFFFFFFFFFFFFFFFFFFFF:FFFF:FFFFFFFFFFFFFFF  
@A00155:342:HHGFNDSXY:1:2444:29008:37043 2:N:0:GAACCTAG+TCCGCATA  
CTTGTTCCAACCTCTGTTTCGGCAGAGGATACCGTGCTCCACAGCTGTAAGGCTGTGGGCCCGAGAGAA  
GTCGCTCTCTCTCGCCCTCCACATCCCTCTCGGCATTGAGATGACCATAGGCCAGAGGAGAGTCCTTA  
+  
FFFFFFFFFFFFFFFFFFFFFFFFFFFFFFFFFFFFFFFFFFFFFFFFFFFFFFFFFFFFFFFFFFFFFFFFFFFFF:FFFFF  
FFFFFFFFFFFFFFFFFFFFFFFF:FFFFFFFFFFFFFFFFFFFFFFFFFFFFFFFFFFFFFFFFFFFFFFFFFFFFF  
@A00155:342:HHGFNDSXY:1:2445:26567:3255 2:N:0:GAACCTAG+TCCGCATA  
ATCAGGGAGCCTACTAGACTCCGACCGTCATGGGGGTTCAAACCATGCCCGCCACACCGCCTTAGA  
TCAGCTGTGTCCACTTAAGGACTCACCTCTGGCCTATGGTCATCTCAATGCCGAGAGGGATGTGGAGG  
+  
FFFFFFFFFFFFFFFFFFFFFFFFFFFFFFFFFFFFFFFFFFFFFFFFFFFFFFFFFFFFFFFFFFFFFFFFFFFFF  
FFFFFFFFFFFFFFFFFFFFFFFF:FFFFFFFFFFFFFFFFFFFFFFFFFFFFFFFFFFFFFFFFFFFFFFFFFFFFF  
@A00155:342:HHGFNDSXY:1:2445:26567:3255 2:N:0:GAACCTAG+TCCGCATA  
ATCAGGGAGCCTACTAGACTCCGACCGTCATGGGGGTTCAAACCATGCCCGCCACACCGCCTTAGA  
TCAGCTGTGTCCACTTAAGGACTCACCTCTGGCCTATGGTCATCTCAATGCCGAGAGGGATGTGGAGG  
+

[illegible]

@A00155:342:HHGFNDSXY:1:2450:2645:23328 2:N:0:GAACCTAG+TCCGCATA  
TCGGCAGAGGATACCGTGCTCCACAGCTGTAAGGCTGTGGGCCCGAGAGAAGTCGCTCTCTCTCGCCC  
TCCACATCCCTCTCGGCATTGAGATGACCATAGGCCAGAGGTGAGTCCTTAAGTGGACACA

+

FFFFFFFFFFFFFFFFFFFFFFFFFFFFFFFFFFFFFFFFFFFFFFFFFFFFFFFFFFFFFFFFFFFFFFFF  
FFFFFFFFFFFFFFFFFFFFFFFFFFFFFFFFFFFFFFFFFFFFFFFFFFFFFFFFFFFFFFFFFFFFFFFF:FFFFFFFF

@A00155:342:HHGFNDSXY:1:2450:7563:29496 2:N:0:GAACCTAG+TCCGCATA  
AGTACATCTCCTTTGGAAGTACAGAGACCCCTCCGGTCTTGTCCAACCTCTGTTTCGGCAGAGGATACC  
GTGCTCCACAGCTGTAAGGCTGTGGGCCCGAGAGAAGTCGCTCTCTCTCGCCCTCCACATCCCTCTCG

+

FFFFFFFFFFFFFFFFFFFFFFFFFFFFFFFFFFFFFFFFFFFFFFFFFFFFFFFFFFFFFFFFFFFFFFFF  
FFFFFFFFFFFFFFFFFFFFFFFFFFFFFFFFFFFFFFFFFFFFFFFFFFFFFFFFFFFFFFFFFFFFFFFF

@A00155:342:HHGFNDSXY:1:2450:6867:29763 2:N:0:GAACCTAG+TCCGCATA  
GTGAACAAGCCCGAGTACATCTCCTTTGGAAGTACAGAGACCCCTCCGGTCTTGTCCAACCTCTGTTT  
CGGCAGAGGATACCGTGCTCCACAGCTGTAAGGCTGTGGGCCCGAGAGAAGTCGCTCTCTCTCGCCCT

+

FFFFFFFFFFFFFFFFFFFFFFFFFFFFFFFFFFFFFFFFFFFFFFFFFFFFFFFFFFFFFFFFFFFFFFFF  
FFFFFFFFFFFFFFFFFFFFFFFFFFFFFFFFFFFFFFFFFFFFFFFFFFFFFFFFFFFFFFFFFFFFFFFF,FFFFFFFFFFFFFFFFFFFFFFFFFFFFFFFFFFFFFFFFFFFFFFFFFFFFFFFFFFFFFFFFFFFFFFFF

@A00155:342:HHGFNDSXY:1:2450:31738:30686 2:N:0:GAACCTAG+TCCGCATA  
CGTCCTAAAAAGGACTCGTCAGGTAGCCTACTAGACTACGACTTACACGGTAGGTCGTGAACAAGCCC  
GGAGTACATCTCCTTTGGAAGTACAGAGACCCCTCCGGTCTTGTCCAACCTCTGTTTCGGCAGAG

+

FFFFFFFFFFFFFFFFFFFFFFFFFFFFFFFFFFFFFFFFFFFFFFFFFFFFFFFFFFFFFFFFFFFFFFFF:FFFFFFF  
FFFFFFF:FFFFFFFFFFFFFFFFFFFFFFFFFFFFFFFFFFFFFFFFFFFFFFFFFFFFFFFFFFFFFFFFFFFFFFFF

@A00155:342:HHGFNDSXY:1:2450:32298:34194 2:N:0:GAACCTAG+TCCGCATA  
ACACGGTAGGTCGTGAACAAGCCCGAGTACATCTCCTTTGGAAGTACAGAGACCCCTCCGGTCTTGTCTC  
CAACCTCTGTTTCGGCAGAGGATACCGTGCTCCACAGCTGTAAGGCTGTGGGCCCGAGAGAAGTCGCT

+

FFFFFFFFFFFFFFFFFFFFFFFFFFFFFFFFFFFFFFFFFFFFFFFFFFFFFFFFFFFFFFFFFFFFFFFF:FFFFFF  
FFFFFFFFF,:FFFFFFFFF,FFFFFFFFFFFFFFFFFFFFFFFFFFFFFFFFFFFFFFFFFFFFFFFFFFFFFFFFFFFFFFFF

@A00155:342:HHGFNDSXY:1:2452:26729:4726 2:N:0:GAACCTAG+TCCGCATA  
GCCTACTAGACTCCGACCGTCATGGGGTTCAAACCCATGCCCCACCACACCGCCTTAGATCAGCTGT  
GTCCACTTAAGGACTCACCTCTGGCCTATGGTCATCTCAATGCCGAGAGGGATGTGGAGGGCGAGAGA

+

FFFFFFFFFFFFFFFFFFFFFFFFFFFFFFFFFFFFFFFFFFFFFFFFFFFFFFFFFFFFFFFFFFFFFFFF  
FFFFFFFFFFFFFFFFFFFFFFFFFFFFFFFFFFFFFFFFFFFFFFFFFFFFFFFFFFFFFFFFFFFFFFFF,FFF:FFFFFFFFFFFFFFFFFFFFFFFFFFFFFFFFFFFFFFFFFFFFFFFFFFFFFFFFFFFFFFFF

@A00155:342:HHGFNDSXY:1:2452:11053:7232 2:N:0:GAACCTAG+TCCGCATA  
CACGGTAGGTCGTGAACAAGCCCGAGTACATCTCCTTTGGAAGTACAGAGACCCCTCCGGTCTTGTCC  
AACCTCTGTTTCGGCAGAGGATACCGTGCTCCACAGCTGTAAGGCTGTGGGCCCGAGAGAAGTCGCTC

+

FFFFFFFFFFFFFFFFFFFFFFFFFFFFFFFFFFFFFFFFFFFFFFFFFFFFFFFFFFFFFFFFFFFFFFFF  
FFFFFFFFFFFFFFFFFFFFFFFF:FF:FFFFFFFFFFFFFFFFFFFFFFFFFFFFFFFFFFFFFFFFFFFFFFFFFFFFFFFFFFFFFFFF

@A00155:342:HHGFNDSXY:1:2452:22779:14638 2:N:0:GAACCTAG+TCCGCATA  
AGAGCGACTTCTCTCGGGCCACAGCCTTACAGCTGTGGAGCACGGTATCCTCTGCCGAAACAGAGGT  
TGGACAAGACCGGAGGGGTCTCCTAGTTCCAAAGGAAATGTACTCCGGGCTTGTTACAGACCTA

+

FFFFFFFFFFFFFFFFFFFFFFFFFFFFFFFFFFFFFFFFFFFFFFFFFFFFFFFFFFFFFFFFFFFFFFFF:FFFFFFF  
FFFFFFFFFFFFFFFFFFFFFFFFFFFFFFFFFFFFFFFFFFFFFFFFFFFFFFFFFFFFFFFFFFFFFFFF

@A00155:342:HHGFNDSXY:1:2452:30327:21418 2:N:0:GAACCTAG+TCCGCATA  
ACTAGACTACGACTTACACGGTAGGTCGTGAACAAGCCCGAGTACATCTCCTTTGGAAGTACAGAGAC  
CCCTCCGGTCTTGTCCAACCTCTGTTTCGGCAGAGGATACCGTGCTCCACAGCTGTAAGGCTGTGGGC

+

F:,F:FFFFFFFFF,F,FFFF,FFF:FFFF,FF,,:FF,F,FFFFFFFFF,,,FFFFFF::FFF  
,:FF,F:F,,FFFFFF:FF,FFFF::FFFFFFFFF:FFF,F,F:F:FFFF:,,,FFFFFF:FFFF:FF

@A00155:342:HHGFNDSXY:1:2452:3079:23578 2:N:0:GAACCTAG+TCCGCATA  
GAACTAGGAGACCCCTCCGGTCTTGTCCAACCTCTGTTTCGGCAGAGGATACCGTGCTCCACAGCTGT  
AAGGCTGTGGGCCCCGAGAGAAGTCGCTCTCTCTCGCCCTCCACATCCCTCTCGGCATTGAGATGACCA  
+  
FFFFFFFFFFFFFFFFFFFFFFFFFFFFFFFFFFFFFFFFFFFFFFFFFFFFFFFFFFFFFFFFFFFFFFFFFFFF  
FFFFFFFFFFFFFFFFFFFFFFFFFFFFFFFFFFFFFFFFFFFFFFFFFFFFFFFFFFFFFFFFFFFFFFFFFFFF  
@A00155:342:HHGFNDSXY:1:2452:11388:26788 2:N:0:GAACCTAG+TCCGCATA  
GGAGTACATCTCCTTTGGAACCTAGGAGACCCCTCCGGTCTTGTCCAACCTCTGTTTCGGCAGAGGATA  
CCGTGCTCCACAGCTGTAAGGCTGTGGGCCCCGAGAGAAGTCGCTCTCTCTCGCCCTCCACATCCCTCT  
+  
FFFFFFFFFFFFFFFFFFFFFFFFFFFFFFFFFFFFFFFFFFFFFFFFFFFFFFFFFFFFFFFFFFFFFFFFFFFF  
FFFFFFFFFFFFFFFFFFFFFFFFFFFFFFFFFFFFFFFFFFFFFFFFFFFFFFFFFFFFFFFFFFFFFFFFFFFF  
@A00155:342:HHGFNDSXY:1:2452:26594:34554 2:N:0:GAACCTAG+TCCGCATA  
TACACGGTAGGTCGTGAACAAGCCCGAGTACATCTCCTTTGGAACCAGGAGACCCCTCCGGTCTTGT  
CCAACCTCTGTTTCGGCAGAGGATACCGTGCTCCACAGCTGTAAGGCTGTGGGCCCCGAGAGAAGTCGC  
+  
FFFFFFFFFFFFFFFFFFFFFFFFFFFFFFFFFFFFFFFFFFFFFFFFFFFFFFFFFFFFFFFFFFFFFFFFFFFF  
FFFFFFFFFFFFFFFFFFFFFFFFFFFFFFFFFFFFFFFFFFFFFFFFFFFFFFFFFFFFFFFFFFFFFFFFFFFF  
@A00155:342:HHGFNDSXY:1:2452:17544:34601 2:N:0:GAACCTAG+TCCGCATA  
GTCCACTTAAGGACTCACCTCTGGCCTATGGTCATCTCAATGCCGAGAGGGATGTGAAGGGCGAGAGA  
GAGCGACTTCTCTCGGGCCCCACAGCCTTACAGCTGTGGAGCACGGTATCCTCTGCCGAAACAGAGGTT  
+  
FFFFFFFFFFFFFFFFFFFFFFFFFFFFFFFFFFFFFFFFFFFFFFFFFFFFFFFFFFFFFFFFFFFFFFFFFFFF  
FFFFFFFFFFFFFFFFFFFFFFFFFFFFFFFFFFFFFFFFFFFFFFFFFFFFFFFFFFFFFFFFFFFFFFFFFFFF  
@A00155:342:HHGFNDSXY:1:2453:29830:3208 2:N:0:GAACCTAG+TCCGCATA  
ACATCTCCTTTGGAACCAGGAGACCCCTCCGGTCTTGTCCAACCTCTGTTTCGGCAGAGGATACCGTG  
CTCCACAGCTGTAAGGCTGTGGGCCCCGAGAGAAGTCGCTCTCTCTCGCCCTCCACATCCCTCTCGGCA  
+  
FFFFFFFFFFFFFFFFFFFFFFFFFFFFFFFFFFFFFFFFFFFFFFFFFFFFFFFFFFFFFFFFFFFFFFFFFFFF  
FFFFFFFFFFFFFFFFFFFFFFFFFFFFFFFFFFFFFFFFFFFFFFFFFFFFFFFFFFFFFFFFFFFFFFFFFFFF  
@A00155:342:HHGFNDSXY:1:2453:21404:21308 2:N:0:GAACCTAG+TCCGCATA  
ACTAGACTACGACTTACACGGTAGGTCGTGAACAAGCCCGAGTACATCTCCTTTGGAACCTAGGAGAC  
CCCTCCGGTCTTGTCCAACCTCTGTTTCGGCAGAGGATACCGTGCTCCACAGCTGTAAGGCTGTGGGC  
+  
FFFFFFFFFFFFFFFFFFFFFFFFFFFFFFFFFFFFFFFFFFFFFFFFFFFFFFFFFFFFFFFFFFFFFFFFFFFF  
FFFFFFFFFFFFFFFFFFFFFFFFFFFFFFFFFFFFFFFFFFFFFFFFFFFFFFFFFFFFFFFFFFFFFFFFFFFF  
@A00155:342:HHGFNDSXY:1:2453:3097:24737 2:N:0:GAACCTAG+TCCGCATA  
AGTACATCTCCTTTGGAACCTAGGAGACCCCTCCGGTCTTGTCCAACCTCTGTTTCGGCAGAGGATACC  
GTGCTCCACAGCTGTAAGGCTGTGGGCCCCGAGAGAAGTCGCTCTCTCTCGCCCCCACATCCCTCTCG  
+  
FFFFFFFFFFFFFFFFFFFFFFFFFFFFFFFFFFFFFFFFFFFFFFFFFFFFFFFFFFFFFFFFFFFFFFFFFFFF  
FFFFFFFFFFFFFFFFFFFFFFFFFFFFFFFFFFFFFFFFFFFFFFFFFFFFFFFFFFFFFFFFFFFFFFFFFFFF  
@A00155:342:HHGFNDSXY:1:2455:32895:11584 2:N:0:GAACCTAG+TCCGCATA  
TCATCAGGTAGCCTACTAGACTACGACTTACACGGTAGGTCGTGAACAAGCCCGAGTACATCTCCTT  
TGGAACCTAGGAGACCCCTCCGGTCTTGTCCAACCTCTGTTTCGGCAGAGGATACCGTGCTCCACAGCT  
+  
FFFFFFFFFFFFFFFFFFFFFFFFFFFFFFFFFFFFFFFFFFFFFFFFFFFFFFFFFFFFFFFFFFFFFFFFFFFF  
FFF:FFFFFFFFFFFFFFFFFFFFFFFFFFFFFFFFFFFFFFFFFFFFFFFFFFFFFFFFFFFFFFFFFFFF  
@A00155:342:HHGFNDSXY:1:2455:8205:12414 2:N:0:GAACCTAG+TCCGCATA  
GGATGTGGAGGGCGAGAGAGAGCGACTTCTCTCGGGCCACAGCCTTACAGCTGTGGAGCACGGTATC  
CTCTGCCGAAACAGAGGTTGGACAAGACCGAGGGGTCTCCTAGTTCCAAAGGAGATGTACTCC  
+  
FFFFFFFFFFFF:FFFFFFFFFFFFFFFFFFFFFFFFFFFFFFFFFFFFFFFFFFFFFFFFFFFFFFFFFFFFF  
FFFFFFFFFFFF,F:FFFFFFFF:FFFF:FFFFFFFFFFFF:FFFFFFFFF:FFFFFFFFF:  
FFFFFFFFFFFF,F:FFFF: :FFFFFFFFFFFFFFFFFFFF:FFFFFFFFFFFFFFFFFFFFFFFFFFFFF

@A00155:342:HHGFNDSXY:1:2456:3947:30906 2:N:0:GAACCTAG+TCCGCATA  
GGACTCGTCAGGTAGCCTACTAGACTACGACTTACACGGTAGGTCGTGAACAAGCCCGGAGTACATCT  
CCTTTGGAAGTAGGAGACCCCTCCGGTCTTGCCAACCTCTGTTTCGGCAGAGGATACCGTGCTCCAC  
+  
FF:FFFFFFFFFFFFFFFFFFFFFFFFFFFFFFFFFFFFFFFFFFFFFFFFFFFFFFFFFFFFFFFFFFFFF  
FFFFFFFFFFFFFF:FFFFFFFFFFFFFFFFFFFFFF,FFFFFFFFFFFFFFFFFFFFFFFFFFFFFF,FFFFFFFFFFFFFFFFFFFF  
@A00155:342:HHGFNDSXY:1:2457:32660:12148 2:N:0:GAACCTAG+TCCGCATA  
CTGGCCTATGGTCATCTCAATGCCGAGAGGGATGTGGAGGGCGAGAGAGAGCGACTTCTCTCGGGCCC  
ACAGCCTTACAGCTGTGGTGCACGGTATCCTCTGCCGAAACAGAGGTTGGACAAGACCGGAGGGGTCT  
+  
FFFFFFFFFFFFFFFFFFFFFFFFFFFFFFFFFFFFFFFFFFFFFFFFFFFFFFFFFFFFFFFFFFFFFFFFF  
FFFFFFFFFFFFFFFFFFFFFFFFFFFFFFFFFFFFFFFFFFFFFFFFFFFFFFFFFFFFFFFFFFFFFFFFF:FFFFFFFFFFFFFFF  
@A00155:342:HHGFNDSXY:1:2457:14904:26490 2:N:0:GAACCTAG+TCCGCATA  
GGACTCGTCAGGTAGCCTACTAGACTACGACTTACACGGTAGGTCGTGAACAAGCCCGGAGTACATCT  
CCTTTGGAAGTAGGAGACCCCTCCGGTCTTGCCAACCTCTGTTTCGGCAGAGGATACCGTGCTCCAC  
+  
FFFFFFFFFFFFFFFFFFFFFFFFFFFFFFFFFFFFFFFFFFFFFFFFFFFFFFFFFFFFFFFFFFFFFFFFF  
FFFFFFFFFFFFFFFFFFFFFFFFFFFFFFFFFFFFFFFFFFFFFFFFFFFFFFFFFFFFFFFFFFFFFFFFF:FFFFFFFFFFFFFFF  
@A00155:342:HHGFNDSXY:1:2458:4309:3662 2:N:0:GAACCTAG+TCCGCATA  
GACGAAACCGTCGTTACTCTACGAGTTGTGTAAGTTTCGTCCTAAAAAGGACTCGTCAGGTAGCCTAC  
TAGACTACGACTTACACGGTAGGTCGTGAACAAGCCCGGAGTACATCTCCTTTGGAAGTAGGAGACCC  
+  
FFFFFFFFFFFFFFFFFFFFFFFFFFFFFFFFFFFFFFFFFFFFFFFFFFFFFFFFFFFFFFFFFFFFFFFFF  
FFFFFFFFFFFFFFFFFFFFFFFFFFFFFFFFFFFFFFFFFFFFFFFFFFFFFFFFFFFFFFFFFFFFFFFFF:FFFFFFFFFFFFFFF  
@A00155:342:HHGFNDSXY:1:2458:11153:14857 2:N:0:GAACCTAG+TCCGCATA  
CCTCTGGCCTATGGTCATCTCAATGCCGAGAGGGATGTGAAGGGCGAGAGAGAGCGACTTCTCTCGGG  
CCCACAGCCTTACAGCTGTGGAGCACGGTATCCTCTGCCGAAACAGAGGTTGGACAAGACCGG  
+  
FFFFFFFFFFFFFFFFFFFFFFFFFFFFFFFFFFFFFFFFFFFFFFFFFFFFFFFFFFFFFFFFFFFFFFFFF  
FFFFFFFFFFFFFFFFFFFFFFFFFFFFFFFFFFFFFFFFFFFFFFFFFFFFFFFFFFFFFFFFFFFFFFFFF:FFFFFFFFFFFFFFF  
@A00155:342:HHGFNDSXY:1:2459:2682:26365 2:N:0:GAACCTAG+TCCGCATA  
ACGGTAGGTCGTGAACAAGCCCGGAGTACATCTCCTTTGGAAGTAGGAGACCCCTCCGGTCTTGCCA  
ACCTCTGTTTCGGCAGAGGATACCGTGCTCCACAGCTGTAAGGCTGTGGGCCCGAGAGAAGTCGCTCT  
+  
FFFFFFFFFFFFFFFFFFFFFFFFFFFFFFFFFFFFFFFFFFFFFFFFFFFFFFFFFFFFFFFFFFFFFFFFF  
FFFFFFFFFFFFFFFFFFFFFFFFFFFFFFFFFFFFFFFFFFFFFFFFFFFFFFFFFFFFFFFFFFFFFFFFF:FFFFFFFFFFFFFFF  
@A00155:342:HHGFNDSXY:1:2459:15302:26428 2:N:0:GAACCTAG+TCCGCATA  
GACGAAACCGTCGTTACTCTTCGAGTTGTGTAAGTTTCGTCCTAAAAAGGACTCGTCAGGTAGCCTAC  
TAGACTACGACTTACACGGTAGGTCGTGAACAAGCCCGGAGTACATCTCCTTTGGAAGTAGGAGACCC  
+  
FFFFFFFFFFFFFFFFFFFFFFFFFFFFFFFFFFFFFFFFFFFFFFFFFFFFFFFFFFFFFFFFFFFFFFFFF  
FFFFFFFFFFFFFFFFFFFFFFFFFFFFFFFFFFFFFFFFFFFFFFFFFFFFFFFFFFFFFFFFFFFFFFFFF:FFFFFFFFFFFFFFF  
@A00155:342:HHGFNDSXY:1:2460:30698:3677 2:N:0:GAACCTAG+TCCGCATA  
CAAGGACGAAACCGTCGTTACTCTTCGAGTTGTGTAAGTTTCGTCCTAAAAAGGACTCGTCAGGTAGC  
CTACTAGACTACGACTTACACGGTAGGTCGTGAACAAGCCCGGAGTACATCTCCTTTGGAAGTAGGAG  
+  
FFFFFFFFFFFFFFFFFFFFFFFFFFFFFFFFFFFFFFFFFFFFFFFFFFFFFFFFFFFFFFFFFFFFFFFFF  
FFFFFFFFFFFFFFFFFFFFFFFFFFFFFFFFFFFFFFFFFFFFFFFFFFFFFFFFFFFFFFFFFFFFFFFFF:FFFFFFFFFFFFFFF  
@A00155:342:HHGFNDSXY:1:2460:18620:4429 2:N:0:GAACCTAG+TCCGCATA  
GGACTCGTCAGGTAGCCTACTAGACTACGACTTACACGGTAGGTCGTGAACAAGCCCGGAGTACATCT  
CCTTTGGAAGTAGGAGACCCCTCCGGTCTTGCCAACCTCTGTTTCGGCAGAGGATACCGTGCTCCAC  
+  
FFFFFFFFFFFFFFFFFFFFFFFFFFFFFFFFFFFFFFFFFFFFFFFFFFFFFFFFFFFFFFFFFFFFFFFFF  
FFFFFFFFFFFFFF:FFFFFFFFFFFFFFFFFFFFFF,FFFFFFFFFFFFFFFFFFFFFFFFFFFFFFFFF:FFFFFFFFFFFFFFF



@A00155:342:HHGFNDSXY:1:2460:30364:13463 2:N:0:GAACCTAG+TCCGCATA  
TGCCCCGCCACACCGCCTTAGATCAGCTGTGTCCACTTAAGGACTCACCTCTGGCCTATGGTCATCTC  
AATGCCGAGAGGGATGTGGAGGGCGAGAGAGAGCGACTTCTCTCGGGCCCACAGCCTTACAGCTGTGG  
+  
FFFFFFFFFFFFFFFFFFFFFFFFF:FFFFFFFFFFFFFFFFFFFFFFFFFFFFFFFFFFFFFFFFFFFF  
FFFFFFFFF,FFFF,F:FFFFFFFFFFFFFFFFFFFFFFFFFFFFFFFFFFFFFFFFFFFFFFFFFFFF  
@A00155:342:HHGFNDSXY:1:2460:6605:23390 2:N:0:GAACCTAG+TCCGCATA  
AAACTTACAACCTCGAAGAGTAACGACGGTTTCGTCTTGGAACGGACTCATCAGGGAGCCTACTAG  
ACTCCGACCGTCATGGGGGTTCAAACCCATGCCCGCCACACCGCCTTAGATCAGCTGTGTCCACTTA  
+  
FFFFFFFFF:FFFFFFFFF:F:FFFF:FFFFFFFFFFFFFFF:FFFFFFF:FFFFFFFF:FFFFFFF  
FFFFFF:FF:FFF:FF:F:FFFFFFFFF:FFFFFFFFFFFFFFFFFFFFFFFFF:FFFFFFFFFFFFFFFF  
@A00155:342:HHGFNDSXY:1:2461:5764:18082 2:N:0:GAACCTAG+TCCGCATA  
GGAGTACATCTCCTTTGGAAGTACCCTCCGGTCTTGCCAACCTCTGTTTCGGCAGAGGATA  
CCGTGCTCCACAGCTGTAAGGCTGTGGGCCCGAGAGAAGTCGCTCTCTCTCGCCCTCCACATCCCTCT  
+  
FFFFFFFFF:FFFFFFFFFFFFFFF:FFFFFFFFFFFFFFFFFFFFFFF:FFFFFFFFFFFFFFFFFFFF  
FFFFFFFFFFFFFFFFFFFFFFFFFFFFFFFFFFFFFFFFFFFFFFFFFFFFFFFFFFFFFFFFFFFFFFFF  
@A00155:342:HHGFNDSXY:1:2461:24270:21230 2:N:0:GAACCTAG+TCCGCATA  
AGTTACGTCCTAAAAAGGACTCGTCAGGTAGCCTACTAGACTACGACTTACACGGTAGGTCTGAACA  
AGCCCGGAGTACATCTCCTTTGGAAGTACCCTCCGGTCTTGCCAACCTCTGTTTCGGCAGA  
+  
FFFF::FFFFFFFFFFFFFFFFFFFFFFFFFFFFFFFFFFFFFFFFFFFFFFFFFFFFFFFFFFFFFFFF  
FFFFFFFFFFFFFFFFFFFFFFFFFFFFFFFFFFFFFFFFFFFFFFFFFFFFFFFFFFFFFFFFFFFFFFFF  
@A00155:342:HHGFNDSXY:1:2461:32533:36354 2:N:0:GAACCTAG+TCCGCATA  
CCCCTCCGGTCTTGTCACCTCTGTTTCGGCAGAGGATACCGTGCTCCACAGCTGTAAGGCTGTGG  
CCCGAGAGAAGTCGCTCTCTCTCGCCCTTCACATCCCTCTCGGCATTGAGATGACCATAGGCCAGAGG  
+  
FFFFFFFFFFF,:FFFFFFFFFFFFFFFFFFFFFFFFFFFFFFFFFFFFFFFFFFFFFFFFFFFFFFFF  
FFFF:FFF:FFFFFFFFF,F:FFFFFFFFFFFFFFFFFFFFFFFFF:FFFFFFFFF,,FFFFFFFFF  
@A00155:342:HHGFNDSXY:1:2462:30996:26115 2:N:0:GAACCTAG+TCCGCATA  
CACGGTAGGTCGTGAACAAGCCCGGAGTACATCTCCTTTGGAAGTACCCTCCGGTCTTGTC  
AACCTCTGTTTCGGCAGAGGATACCGTGCTCCACAGCTGTAAGGCTGTGGGCCCGAGAGAAGTCGCTC  
+  
FFFFFFFFFFFFFFFFFFFFFFFFFFFFFFFFFFFFFFFFFFFFFFFFFFFFFFFFFFFFFFFFFFFFFFFF  
FFFFFFFFFFFFFFFFFFFFFFFFFFFFFFFFFFFFFFFFFFFFFFFFFFFFFFFFFFFFFFFFFFFFFFFF  
@A00155:342:HHGFNDSXY:1:2463:21305:17409 2:N:0:GAACCTAG+TCCGCATA  
ACTCGTCAGGTAGCCTACTAGACTACGACTTACACGGTAGGTCTGAACAAGCCCGGAGTACATCTC  
TTTGAACCAGGAGACCCCTCCGGTCTTGTCACCTCTGTTTCGGCAGAGGATACCGTGCTCCACAG  
+  
FFFFFFFFFFFFFFFFFFFFFFFFFFFFFFFFFFFFFFFFFFFFFFFFF:FFFF,FFFFFFFFFFFFFFFF  
FFFFFFFFFFFFFFFFFFFFFFFFFFFFFFFFFFFFFFFFFFFFFFFFFFFFFFFFFFFFFFFFFFFFFFFF  
@A00155:342:HHGFNDSXY:1:2464:22453:2018 2:N:0:GAACCTAG+TCCGCATA  
CGGTAGGTCGTGAACAAGCCCGGAGTACATCTCCTTTGGAAGTACCCTCCGGTCTTGTC  
CCTCTGTTTCGGCAGAGGATACCGTGCTCCACAGCTGTAAGGCTGTGGGCCCGAGAGAAGTCGCTCTC  
+  
FFFFFFFFFFFFFFFFFFFFFFFFFFFFFFFFFFFFFFFFFFFFFFFFFFFFFFFFFFFFFFFFFFFFF:FFFFFF  
FFFFFFFFFFFFFFFFFFFFFFFFF:FFFFFFFFFFFFFFFFFFFFFFFFFFFFFFFFFFFFFFFFFFFF  
@A00155:342:HHGFNDSXY:1:2464:22634:2926 2:N:0:GAACCTAG+TCCGCATA  
CGGTAGGTCGTGAACAAGCCCGGAGTACATCTCCTTTGGAAGTACCCTCCGGTCTTGTC  
CCTCTGTTTCGGCAGAGGATACCGTGCTCCACAGCTGTAAGGCTGTGGGCCCGAGAGAAGTCGCTCTC  
+  
FFFFFFFFFFFFFFFFFFFFFFFFFFFFFFFFFFFFFFFFFFFFFFFFFFFFFFFFFFFFFFFFFFFFF:FFFFFF  
FFFFFF:FFFFFFFFFFFFFFFFFFFFFFFFFFFFFFFFFFFFFFFFFFFFFFFFFFFFFFFFFFFFFFFF  
@A00155:342:HHGFNDSXY:1:2464:22634:2926 2:N:0:GAACCTAG+TCCGCATA  
CGGTAGGTCGTGAACAAGCCCGGAGTACATCTCCTTTGGAAGTACCCTCCGGTCTTGTC  
CCTCTGTTTCGGCAGAGGATACCGTGCTCCACAGCTGTAAGGCTGTGGGCCCGAGAGAAGTCGCTCTC

+

 $+$ 

+

+

+

+

+

 $+$  $\pm$ [illegible]

@A00155:342:HHGFNDSXY:1:2465:5086:30749 2:N:0:GAACCTAG+TCCGCATA  
CCGTTCCAAGGACGAAACCGTCGTACTCTTTGAGTTGTGTAAGTTTCGTCCTAAAAAGGACTCGTCA  
GGTAGCCTACTAGACTACGACTTACACGGTAGGTCGTGAACAAGCCCGAGTACATCTCCTTTGGAAC  
+  
FFFFFFFFFFFFFFFFFFFFFFFFFFFFFFFFFFFFFFFFFFFFF,FFFFFFFFFFFFFFF:FF:FFFF,FFFFFFFFFFFFFFFFF,F:  
FFFFFFFFFFFFFFFFFFFFFFFFFFFFFFFFFFFFFFFFFFFFFFFFFFFFFFFFFFFFFFFFFFFFFFFFFFFFFFFF:F  
@A00155:342:HHGFNDSXY:1:2466:13105:24408 2:N:0:GAACCTAG+TCCGCATA  
AGGACGAAACTTACACAACCTCGAAGAGTAACGACGGTTTCGTCCTTGGAACGGACTCATCAGGGAGCC  
TACTAGACTCCGACCGTCATGGGGGTTCAAACCCATGCCCGCCACACCGCCTTAGATCAGCTGTGTC  
+  
FFFFFFFFFFFFFFFFFFFFFFFFFFFFFFFFFFFFFFFFFFFFFFFFFFFFFFFFFFFFFFFFFFFFFFFFFFFFFFFFF  
FFFFFFFFFFFFFFFFFFFFFFFFFFFFFFFFFFFFFFFFFFFFFFFFFFFFFFFFFFFFFFFFFFFFFFFFFFFFFFFFF  
@A00155:342:HHGFNDSXY:1:2466:30960:35415 2:N:0:GAACCTAG+TCCGCATA  
ATCTAAGGCGGTGTGGCGGGGCATGGGTTTGAACCCCCATGACGGTCGGAGTCTAGTAGGCTCCCTGA  
TGAGTCCGTTCCAAGGACGAAACCGTCGTTACTCTTCGAGTTGTGTAAGTTTCGTCCTAAAAAGGACT  
+  
FFFFFFFFFFFFFFFFFFFFFFFFFFFFFFFFFFFFFFFFFFFFFFFFFFFFFFFFFFFFFFFFFFFFFFFFFFFFFFFFF  
FFFFFFFFFFFFFFFFFFFFFFFFFFFFFFFFFFFFFFFFFFFFFFFFFFFFFFFFFFFFFFFFFFFFFFFFFFFFFFFFF  
@A00155:342:HHGFNDSXY:1:2467:28040:12414 2:N:0:GAACCTAG+TCCGCATA  
GAGACCCCTCCGCTCTTGTTCCAACCTCTGTTTCGGCAGAGGATACCGTGCTCCACAGCTGTAAGGCTG  
TGGGCCCAGAGAAGTCGCTCTCTCTCGCCCTCCACATCCCTCTCGGCATAGAGATGACCATAGGCCA  
+  
FF,F,:FFFFFFFF,FFF:FFFF:FF:F,F,FF,:FF,FFFFFFFFFFFFFFFFFFFF,FF,FFF:FF:F  
FFFF:FFFF,:F,:FF,F,:FFF:,F:FFFF,F:FFFF,FFFFFFFF:FFF:FFFFFFFF,FF,FFF  
@A00155:342:HHGFNDSXY:1:2467:6587:23735 2:N:0:GAACCTAG+TCCGCATA  
CCGTCGTTACTCTTTGAGTTGTGTAAGTTTCGTCCTAAAAAGGACTCGTCAGGTAGCCTACTAGACTA  
CGACTTACACGGTAGGTCGTGAACAAGCCCGGAGTACATCTCCTTTGGAAGTGGAGACCCCTCCGGT  
+  
F:FFFFFFFFF,FFFFFF:FFFFFFFFFFFFFFFFFFFFFFFFFFFFF:,F:F,FFFFFFFFFFFF:FF  
FFFFFFFFFFFFFFFFFFFF,FFF,FFFFFF,F,FFFFFFFFFFFFFFFFFFFF:FFFFFFFFFFFFFFFFFFFFF  
@A00155:342:HHGFNDSXY:1:2467:6542:23750 2:N:0:GAACCTAG+TCCGCATA  
CCGTCGTTACTCTTTGAGTTGTGTAAGTTTCGTCCTAAAAAGGACTCGTCAGGTAGCCTACTAGACTA  
CGACTTACACGGTAGGTCGTGAACAAGCCCGGAGTACATCTCCTTTGGAAGTGGAGACCCCTCCGGT  
+  
FFFFFFFFFFFFFFFFFFFFFFFFFFFFFFFFFFFFFFFFFFFFF:FFFFFFFFFFFFFFFFFFFFFFFFFFFFF:FFFF:FFFFFFFFF  
FFFFF:FFFFFFFFFFFFFFFFFFFFFFFFFFFFFFFFFFFFFFFFFFFFFFFFFFFFFFFFFFFFFFFFFFFFF:FFFFF:F  
@A00155:342:HHGFNDSXY:1:2467:7337:25003 2:N:0:GAACCTAG+TCCGCATA  
CCGTCGTTACTCTTTGAGTTGTGTAAGTTTCGTCCTAAAAAGGACTCGTCAGGTAGCCTACTAGACTA  
CGACTTACACGGTAGGTCGTGAACAAGCCCGGAGTACATCTCCTTTGGAAGTGGAGACCCCTCCGGT  
+  
FFFFFFFFFFFFFFF,FFFFF,FF,FFFFFF:FFFFFFFFF:FFFFFFFFFFFFFFFFFFFFFFFFFFFFF:FFFFFFFFF:  
FFFFFFFFFFFFFFF:F:FF:FF::FFFFFF:FFF,FFFFFF:FFF:FFFFFFFFFFFFFFFFFFFFF:FFFFF  
@A00155:342:HHGFNDSXY:1:2468:17074:6668 2:N:0:GAACCTAG+TCCGCATA  
AAGGACGAAACCGTCGTACTCTTCGAGTTGTGTAAGTTTCGTCCTAAAAGGGACTCGTCAGGTAGCC  
TACTAGACTACGACTTACACGGTAGGTCGTGAACAAGCCCGGAGTACATCTCCTTTGGAAGTGGAGAG  
+  
FFFFFFFFFFFFFFFFFFFFFFFFFFFFFFFFFFFFFFFFFFFFF:FFFFFFFFFFFFFFFFFFFFFFFFFFFFFFFFF  
FFFFFFFFFFFFFFFFFFFFFFFFFFFF,FFFFFFF:FFFF:FFFFFFFFFFFFFFFFFFFFFFFFFFFFFFFFF  
@A00155:342:HHGFNDSXY:1:2468:1678:13228 2:N:0:GAACCTAG+TCCGCATA  
TGGAAGTGGAGACCCCTCCGCTCTTGTTCCAACCTCTGTTTCGGCAGAGGATACCGTGCTCCACAGCT  
GTAAGGCTGTGGGCCCGAGAGAAGTCGCTCTCTCTCGCCCTCCACATCCCTCTCGGCATTGAGATGAC  
+  
FFFF:FFFF:FFFFFFFFFFFFF,F,:FFFFFFFFFFFFFFFFFFFFFFFFFFFFF:FFFFFFFFFFFF:FF:FF  
FFFFFFFFFFFFFFFFFFFFF:F:FF,FFFFFFFFFFFFFFFFFFFFFFFFFFFFF:FF:FFFF:FF:FFFF:FFFFFFFF

Q@A00155:342:HHGFNDSXY:1:2468:16043:19883 2:N:0:GAACCTAG+TCCGCATA  
GTGGAGCACGGTATCCTCTGCCGAAACAGAGGTTGGACAAGACCGGAGGGGTCTCCTAGTTCCAAAGG  
AGATGTACTCCGGGCTTGTTACGACCTACCGTGTAAGTCGTAGTCTAGTAGGCTACCTGAC  
+  
FFFFFFFFFFFFFFFFFFFFFFFFFFFFFFFFFFFFFFFFFFFFFFFFFFFFFFFFFFFFFFFFFFFFFFFF  
FF:FFFFFFFFFFFFFFFFFFFFFFFFFFFFFFFFFFFFFFFFFFFFFFFFFFFFFFFFFFFFFFFFFFFF  
@A00155:342:HHGFNDSXY:1:2469:1253:6261 2:N:0:GAACCTAG+TCCGCATA  
ACTTACACGGTAGGTGCTGAACAAGCCCGGAGTACATCTCCTTTGGAAGTACAGAGACCCCTCCGGTCT  
TGTCACACCTCTGTTTCGGCAGAGGATACCGTGCTCCACAGCTGTAAGGCTGTGGGCCCGAGAGAAG  
+  
::FFFF:FFFF:FFFFFFFF:FF::FFFFFFFF:FFFF:F:F:FFFF:FFF:FFFFFFFF:FFFFFFFF:FF  
FFFF,, :FF:FFFFFFFF:,FFFFFFFF,FFF:FFF:F:FFFFFFFF:FF:FFFFFFFF:FFFFFFFF  
@A00155:342:HHGFNDSXY:1:2469:20428:8719 2:N:0:GAACCTAG+TCCGCATA  
GGACTCGTCAGGTAGCCTACTAGACTACGACTTACACGGTAGGTGCTGAACAAGCCCGGAGTACATCT  
CCTTTGGAAGTACAGAGACCCCTCCGGTCTTGTCACACCTCTGTTTCGGCAGAGGATACCGTGCTCCAC  
+  
FFFFFFFFFFFFFFF,FFFFFFFFFFFFFFFFFFFFFFFFFFFFFFFFFFFFFFFFFFFFFFFFFFFFFFFF  
FFFFFFFF:FFFFFFFFFFFFFFFFFFFFFFFFFFFFFFFFFFFFFFFFFFFFFFFFFFFFFFFFFFFFFFFF  
@A00155:342:HHGFNDSXY:1:2469:31114:14544 2:N:0:GAACCTAG+TCCGCATA  
GGAGTACATCTCCTTTGGAAGTACAGAGACCCCTCCGGTCTTGTCACACCTCTGTTTCGGCAGAGGATA  
CCGTGCTCCACAGCTGTAAGGCTGTGGGCCCGAGAGAAGTCGCTCTCTCTCGCCCTCTACATCCCTCT  
+  
FFFF:FFFFFFFF:FFFFFFFFFFFFFFFFFFFFFFFFFFFFFFFFFFFFFFFFFFFFFFFFFFFFFFFF  
FFFFFFFFFFFFFFFFFFFFFFFFFFFFFFFFFFFFFFFFFFFFFFFFFFFFFFFFFFFFFFFFFFFFFFFF,FFFF:FF  
@A00155:342:HHGFNDSXY:1:2469:14760:26303 2:N:0:GAACCTAG+TCCGCATA  
GAGACCCCTCCGGTCTTGTCACACCTCTGTTTCGGCAGAGGATACCGTGCTCCACAGCTGTAAGGCTG  
TGGGCCCGAGAGAAGTCGCTCTCTCTCGCCCTCCACATCCCTCTCGGCATTGAGATGACCATAGGCCA  
+  
FF:FFF:FFFFFFFF:FF::FFFFFFFFFFFFFFFF,FFFFFFFFFFFFFFFF:FFFFFFFF:FFF:FFF  
FF:FFFFFFFF:FFFFFFFFFFFFFFFFFFFFFFFFFFFFFFFFFFFFFFFFFFFFFFFFFFFFFFFFFFFF  
@A00155:342:HHGFNDSXY:1:2470:23204:1689 2:N:0:GAACCTAG+TCCGCATA  
AGTTGTGTAAGTTTCGTCCTAAAAAGGACTCGTCAGGTAGCCTACTAGACTACGACTTACACGGTAGG  
TCGTGAACAAGCCCGGAGTACATCTCCTTTGGAAGTACAGAGACCCCTCCGGTCTTGTCACACCTCTGT  
+  
FFFFFFFFFFFFFFFFFFFFFFFFFFFFFFFFFFFFFFFFFFFFFFFFFFFFFFFFFFFFFFFFFFFFFFFF  
FFFFFFFFFFFFFFFFFFFFFFFFFFFFFFFFFFFFFFFFFFFFFFFFFFFFFFFFFFFFFFFFFFFFFFFF  
@A00155:342:HHGFNDSXY:1:2470:2799:2206 2:N:0:GAACCTAG+TCCGCATA  
GTTGTGTAAGTTTCGTCCTAAAAAGGACTCGTCAGGTAGCCTACTAGACTACGACTTACACGGTAGGT  
CGTGAACAAGCCCGGAGTACATCTCCTTTGGAAGTACAGAGACCCCTCCGGTCTTGTCACACCTCTGT  
+  
FFFFFFFFFFFFFFFFFFFFFFFFFFFFFFFFFFFFFFFFFFFFFFFFFFFFFFFFFFFFFFFFFFFFFFFF  
FFFFFFFFFFFFFFFFFFFFFFFFFFFFFFFFFFFFFFFFFFFFFFFFFFFFFFFFFFFFFFFFFFFFFFFF  
@A00155:342:HHGFNDSXY:1:2471:24415:8703 2:N:0:GAACCTAG+TCCGCATA  
ACTTACACGGTAGGTGCTAAACAAGCCCGGAGTACATCTCCTTTGGAAGTACAGAGACCCCTCCGGTCT  
TGTCACACCTCTGTTTCGGCAGAGGATACCGTGCTCCACAGCTGTAAGGCTGTGGGCCCGAGAGAAGT  
+  
FFFFFFFFFFFFFFFFFFFFFFFFFFFFFFFFFFFFFFFFFFFFFFFFFFFFFFFFFFFFFFFFFFFFFFFF  
FFFFFFFFFFFFFFFFFFFFFFFFFFFFFFFFFFFFFFFFFFFFFFFFFFFFFFFFFFFFFFFFFFFFFFFF  
@A00155:342:HHGFNDSXY:1:2471:7265:20431 2:N:0:GAACCTAG+TCCGCATA  
ACTACGACTTACACGGTAGGTGCTGAACAAGCCCGGAGTACATCTCCTTTGGAAGTACAGAGACCCCTC  
CGGTCTTGTCACACCTCTGTTTCGGCAGAGGATACCGTGCTCCACAGCTGTAAGGCTGTGGGCCCGAG  
+  
FFFFFFFFFFFFFFFFFFFFFFFFFFFFFFFFFFFFFFFFFFFFFFFFFFFFFFFFFFFFFFFFFFFFFFFF  
FFFFFFFFFFFFFFFFFFFFFFFFFFFFFFFFFFFFFFFFFFFFFFFFFFFFFFFFFFFFFFFFFFFFFFFF  
@A00155:342:HHGFNDSXY:1:2471:7265:20431 2:N:0:GAACCTAG+TCCGCATA  
ACTACGACTTACACGGTAGGTGCTGAACAAGCCCGGAGTACATCTCCTTTGGAAGTACAGAGACCCCTC  
CGGTCTTGTCACACCTCTGTTTCGGCAGAGGATACCGTGCTCCACAGCTGTAAGGCTGTGGGCCCGAG

@A00155:342:HHGFNDSXY:1:2471:18566:28447 2:N:0:GAACCTAG+TCCGCATA  
CCTACTAGACTACGACTTACACGGTAGGTCGTGAACAAGCCCGGAGTACATCTCCTTTGGAAGTAGGA  
GACCCCTCCGGTCTTGTCCAACCTCTGTTTCGGCAGAGGATACCGTGCTCCACAGCTGTAAGGCTGTG  
+  
FFFFFFFFFFFFFFFFFFFFFFFFFFFFFFFFFFFFFFFFFFFFFFFFFFFFFFFFFFFFFFFFFFFFFFFFFFFF  
FFFFFFFFFFFFFFFFFFFFFFFFFFFFFFFFFFFFFFFFFFFFFFFFFFFFFFFFFFFFFFFFFFFFFFFFFFFF  
@A00155:342:HHGFNDSXY:1:2471:2682:29653 2:N:0:GAACCTAG+TCCGCATA  
GGACTCGTCAGGTAGCCTACTAGACTACGACTTACACGGTAGGTCGTGAACAAGCCCGGAGTACATCT  
CCTTTGGAAGTAGGAGACCCCTCCGGTCTTGTCCAACCTCTGTTTCGGCAGAGGATACCGTGCTCCAC  
+  
FFFFFFFFFFFFFFFFFFFFFFFFFFFFFFFFFFFFFFFFFFFFFFFFFFFFFFFFFFFFFFFFFFFFFFFFFFFF  
FFFFFFFFFFFFFFFFFFFFFFFFFFFFFFFFFFFFFFFFFFFFFFFFFFFFFFFFFFFFFFFFFFFFFFFFFFFF  
@A00155:342:HHGFNDSXY:1:2471:1832:30749 2:N:0:GAACCTAG+TCCGCATA  
GGACTCGTCAGGTAGCCTACTAGACTACGACTTACACGGTAGGTCGTGAACAAGCCCGGAGTACATCT  
CCTTTGGAAGTAGGAGACCCCTCCGGTCTTGTCCAACCTCTGTTTCGGCAGAGGATACCGTGCTCCAC  
+  
FFFFFFFFFF:FF:FFFFFFFF:FF:F:FF:FFFFFFFFFFFFFFFFFFFFFFFFFFFFFFFFFFFFFFFFFFFF:FFF  
FF:FFFF,,F,FFFF,FFFFFFFFFFFFFFFFFFFFFFFFFFFFFFFFFFFFFFFFFFFFFFFFFFFFFFFF  
@A00155:342:HHGFNDSXY:1:2471:19859:32033 2:N:0:GAACCTAG+TCCGCATA  
GACCCCTCCGGTCTTGTCCAACCTCTGTTTCGGCAGAGGATACCGTGCTCCACAGCTGTAAGGCTGTG  
GGCCCGAGAGAAGTCGCTCTCTCGCCCTCCACATCCCTCTCGGCATTGAGATGACCATAGGC  
+  
FFFFFFFFFFFFFFFFFFFFFFFFFFFFFFFFFFFFFFFFFFFFFFFFFFFFFFFFFFFFFFFFFFFFFFFFFFFF  
FFFFFFFFFFFFFFFFFFFFFFFFFFFFFFFFFFFFFFFFFFFFFFFFFFFFFFFFFFFFFFFFFFFFFFFFFFFF  
@A00155:342:HHGFNDSXY:1:2471:25925:32299 2:N:0:GAACCTAG+TCCGCATA  
GAAACCGTCGTTACTCTTCGAGTTGTGTAATTTTCGTCCTAAAAAGGACTCGTCAGGTAGCCTACTAG  
ACTACGACTTACACGGTAGGTCGTGAACAAGCCCGGAGTACATCTCCTTTGGAAGTAGGAGACCCCTC  
+  
FFFFFFFFFFFFFFFFFFFFFFFFFFFFFFFFFFFFFFFFFFFFFFFFFFFFFFFFFFFFFFFFFFFFFFFFFFFF  
FFFFFFFFFFFFFFFFFFFFFFFFFFFFFFFFFFFFFFFFFFFFFFFFFFFFFFFFFFFFFFFFFFFFFFFFFFFF  
@A00155:342:HHGFNDSXY:1:2472:1841:13228 2:N:0:GAACCTAG+TCCGCATA  
GAGACCCCTCCGGTCTTGTCCAACCTCTGTTTCGGCAGAGGATACCGTGCTCCACAGCTGTAAGGCTG  
TGGGCCCCGAGAGAAGTCGCTCTCTCGCCCTCCACATCCCTCTCGGCATTGAGATGACC  
+  
FFFF::FFFFFFFF:FFFF,FFFF:FFFF:FFFFFFFFFFFF::FFFFFFFF:FFFFFFFFFFFF:FFF:F  
FFFFFFFF,FFFFFFFF:F:FFFFFFFF:FFFFFFFF:FFFF:FFFF,,FFFFFFFF:  
@A00155:342:HHGFNDSXY:1:2472:15338:14904 2:N:0:GAACCTAG+TCCGCATA  
TGTGTAAGTTTCGTCCTAAAAAGGACTCGTCAGGTAGCCTACTAGACTACGACTTACACGGTAGGTCG  
TGAACAAGCCCGGAGTACATCTTCTTTGGAAGTAGGAGACCCCTCCGGTCTTGTCCAACCTCTGTTTC  
+  
FFFFFFFFFFFFFFFFFFFFFFFFFFFFFFFFFFFFFFFFFFFFFFFFFFFFFFFFFFFFFFFFFFFFFFFFFFFF  
FFFFFFFFFFFFFFFFFFFFFFFFFFFFFFFFFFFFFFFFFFFFFFFFFFFFFFFFFFFFFFFFFFFFFFFFFFFF  
@A00155:342:HHGFNDSXY:1:2472:15492:15358 2:N:0:GAACCTAG+TCCGCATA  
AGGACGAAACCGTCGTTACTCTTCGAGTTGTGTAAGTTTCGTCCTAAAAAGGACTCGTCAGGTAGCCT  
ACTAGACTACGACTTACACGGTAGGTCGTGAACAAGCCCGGAGTACATCTCCTTTGGAAGTAGGAGAC  
+  
FF:FFF,FFFFFFFFFFFFFFFFFFFFFFFFFFFFFFFFFFFFFFFFFFFFFFFFFFFFFFFFFFFFFFFFFFFF  
FFFFFFFFFFFFFFFFFFFFFFFFFFFFFFFFFFFFFFFFFFFFFFFFFFFFFFFFFFFFFFFFFFFFFFFFFFFF  
@A00155:342:HHGFNDSXY:1:2473:28574:35164 2:N:0:GAACCTAG+TCCGCATA  
GCTGTGGGCCCGAGAGAA  
+  
FFFFFFFFFFFFFFFFFFFF  
@A00155:342:HHGFNDSXY:1:2474:31620:10692 2:N:0:GAACCTAG+TCCGCATA  
GTCCTAAAAAGGACTCGTCAGGTAGCCTACTAGACTACGACTTACACGGTAGGTCGTGAACAAGCCCG

GAGTACATCTCCTTTGGAAGTACGAGACCCCTCCGGTCTTGTCCAACCTCTGTTTCGGCAGAGGATAC  
+  
FFFFFFFFFFFFFFFFFFFFFFFFFFFFFFFFFFFFFFFFFFFFFFFFFFFFFFFFFFFFFFFFFFFFFFFF  
FFFFFFFFFFFFFFFFFFFFFFFFFFFFFFFFFFFFFFFFFFFFFFFFFFFFFFFFFFFFFFFFFFFFFFFF  
@A00155:342:HHGFNDSXY:1:2474:8296:16203 2:N:0:GAACCTAG+TCCGCATA  
TACGACTTACACGGTAGGTCGTGAACAAGCCCGAGTACAACCTCTTTGGAAGTACGAGACCCCTCCG  
GTCTTGTCCAACCTCTGTTTCGGCAGAGGATACCGTGCTCCACAGCTGTAAGGCTGTGGGCCCG  
+  
FFFFFFFFFFFFFFFFFFFFFFFFFFFFFFFFFFFFFFFFFFFFFFFFFFFFFFFFFFFFFFFFFFFFFFFF  
FFFFFFFFFFFFFFFFFFFFFFFFFFFFFFFFFFFFFFFFFFFFFFFFFFFFFFFFFFFFFFFFFFFFFFFF  
@A00155:342:HHGFNDSXY:1:2474:27832:33912 2:N:0:GAACCTAG+TCCGCATA  
GTGAACAAGCCCGAGTACATCTCCTTTGGAAGTATGAGACCCCTCCGGTCTTGTCCAACCTCTGTT  
CGGCAGAGGATACCGTGCTCCACAGCTGTAAGGCTGTGGGCCCGAGAGAAGTCGCTCTCTCTCGCCCT  
+  
FFFFFFFF:FFFFFFFFFFFFFFFFFFFFFFFFFFFFFFFFFFFFFFFFFFFFFFFFFFFFFFFFFFFFFFFF  
FFFFFFFFFFFFFFFFFFFFFFFFFFFFFFFFFFFFFFFFFFFFFFFFFFFFFFFFFFFFFFFFFFFFFFFF  
@A00155:342:HHGFNDSXY:1:2475:14118:7028 2:N:0:GAACCTAG+TCCGCATA  
AGCCCGGAGTACATCTCCTTTGGAACCAGGAGACCCCTCCGGTCTTGTCCAACCTCTGTTTCGGCAGA  
GGATACCGTGCTCCACAGCTGTAAGGCTGTGGGCCCGAGAGAAGTCGCTCTCTCTCGCCCTCCACATC  
+  
FFFFFFF:FFFFFFFFFFFFFFFFFFFFFFFFFFFFFFFFFFFFFFFFFFFFFFFFFFFFFFFFFFFFFFFF  
FFF:FFFFFFFFFFFFFFFFFFFFFFFFFFFFFFFFFFFFFFFFFFFFFFFFFFFFFFFFFFFFFFFFFFFF  
@A00155:342:HHGFNDSXY:1:2475:23149:11083 2:N:0:GAACCTAG+TCCGCATA  
AAAAGGACTCGTCAGGTAGCCTACTAGACTACGACTTACACGGTAGGTCGTGAACAAGCCCGAGTAC  
ATCTCCTTTGGAATTAGGAGACCCCTCCGGTCTTGTCCAACCTCTGTTTCGGCAGAGGATACCGTGCT  
+  
FFFFFFFFFFFFFFFFFFFFFFFFFFFFFFFFFFFFFFFFFFFFFFFFFFFFFFFFFFFFFFFFFFFFFFFF  
FFFFFFFFFFFFFFFFFFFFFFFFFFFFFFFFFFFFFFFFFFFFFFFFFFFFFFFFFFFFFFFFFFFFFFFF  
@A00155:342:HHGFNDSXY:1:2475:5873:15013 2:N:0:GAACCTAG+TCCGCATA  
GGACTCGTCAGGTAGCCTACTAGACTACGACTTACACGGTAGGTCGTGAACAAGCCCGAGTACATCT  
CCTTTGGAAGTACGAGACCCCTCCGGTCTTGTCCAACCTCTGTTTCGGCAGAGGATACCGTGCTCCAC  
+  
FFFFFFFFFFFFFFFFFFFFFFFFFFFFFFFFFFFFFFFFFFFFFFFFFFFFFFFFFFFFFFFFFFFFFFFF  
FFFFFFFFFFFFFFFFFFFFFFFFFFFFFFFFFFFFFFFFFFFFFFFFFFFFFFFFFFFFFFFFFFFFFFFF  
@A00155:342:HHGFNDSXY:1:2475:23213:15922 2:N:0:GAACCTAG+TCCGCATA  
AAGGACGAAACCGTCGTTACTCTTCGAGTTGTGTAAGTTTCGTCCTAAAAAGGACTCGTCAGGTAGCC  
TACTAGACTACGACTTACACGGTAGGTCGTGAACAAGCCCGAGTACATCTCCTTTGGAAGTACGAGAG  
+  
FFFFFFFFFFFFFFFFFFFFFFFFFFFFFFFFFFFFFFFFFFFFFFFFFFFFFFFFFFFFFFFFFFFFFFFF  
FFFFFFFFFFFFFFFFFFFFFFFFFFFFFFFFFFFFFFFFFFFFFFFFFFFFFFFFFFFFFFFFFFFFFFFF  
@A00155:342:HHGFNDSXY:1:2475:12500:24518 2:N:0:GAACCTAG+TCCGCATA  
AGCCCGGAGTACATCTCCTTTGGAAGTACGAGACCCCTCCGGTCTTGTCCAACCTCTGTTTCGGCAGA  
GGATACCGTGCTCCACAGCTGTAAGGCTGTGGGCCCGAGAGAAGTCGCTCTCTCTCGCCCT  
+  
FFFFFFFFFFFFFFFFFFFFFFFFFFFFFFFFFFFFFFFFFFFFFFFFFFFFFFFFFFFFFFFFFFFFFFFF  
FFFFFFFFFFFFFFFFFFFFFFFFFFFFFFFFFFFFFFFFFFFFFFFFFFFFFFFFFFFFFFFFFFFFFFFF  
@A00155:342:HHGFNDSXY:1:2475:7789:26349 2:N:0:GAACCTAG+TCCGCATA  
CACGGTAGGTCGTGAACAAGCCCGAGTACATCTCCTTTGGAAGTACGAGACCCCTCCGGTCTTGTCC  
AACCTCTGTTTCGGCAGAGGATACCGTGCTCCACAGCTGTAAGGCTGTGGGCCCGAGAGAAGTCGCTC  
+  
FFFFFFFFFFFFFFFFFFFFFFFFFFFFFFFFFFFFFFFFFFFFFFFFFFFFFFFFFFFFFFFFFFFFFFFF  
FFFFFFFFFFFFFFFFFFFFFFFFFFFFFFFFFFFFFFFFFFFFFFFFFFFFFFFFFFFFFFFFFFFFFFFF  
@A00155:342:HHGFNDSXY:1:2475:12717:30436 2:N:0:GAACCTAG+TCCGCATA  
CTTCGAGTTGTGTAAGTTTCGTCCTAAAAAGGACTCGTCAGGTAGCCTACTAGACTACGACTTACACG

GTAGGTCGTGAACAAGCCCGGAGTACATCTCCTTTGAACTAGGAGACCCCTCCGGTCTTGTCACACC  
+  
FFFFFFFFFFFFFFFFFFFFFFFFFFFFFFFFFFFFFFFFFFFFFFFFFFFFFFFFFFFFFFFFFFFFFFFFF:FFFFFFFFFFFFFFFFFFFFFFFFFFFFFFFFF  
FFFFFFFFFFFFFFFFFFFFFFFFFFFFFFFFFFFFFFFFFFFFFFFFFFFFFFFFFFFFFFFFFFFFFFFFFFFFFFFFFFFFFFFFFFFFFFFFFFFFFFFFFFFFF  
@A00155:342:HHGFNDSXY:1:2476:9082:3505 2:N:0:GAACCTAG+TCCGCATA  
AAGGACTCGTCAGGTAGCCTACTAGACTACGACTTACACGGTAGGTCTGTGAACAAGCCCGGAGTACAT  
CTCCTTTGGAACCAGGAGACCCCTCCGGTCTTGTCACACCTCTGTTTCGGCAGAGGATACCGTG  
+  
FFFFFFFFFFFFFFFFFFFFFFFFFFFFFFFFFFFFFFFFFFFFFFFFFFFFFFFFFFFFFFFFFFFFFFFFF:FFFFFFFFFFFFFFFFFFFFFFFFFFFFFFFFF  
FFFFFFFFFFFFFF:FFFFFFFFFFFFFFFFFFFFFFFFFFFFFFFFFFFFFFFFFFFFFFFFFFFFFFFFF:FFFFFF:FFFFFFFFFFFF  
@A00155:342:HHGFNDSXY:1:2476:23484:7373 2:N:0:GAACCTAG+TCCGCATA  
GTTTCGTCTTGGAACGGACTCATCAGGGAGCCTACTAGACTCCGACCGTCATGGGGGTTCAAACCCA  
TGCCCCGCCACACCGCCTTAGATCAGCTGTGTCCACTTAAGGACTCACCTCTGGCCTATGGTCATCTC  
+  
FFFFFFFFFFFFFFFFFFFFFFFFFFFFFFFFFFFFFFFFFFFFFFFFFFFFFFFFFFFFFFFFFFFFFFFFF:FFFFFFFFFFFFFFFFFFFFFFFFFFFFFFFFF  
,FFFFFFFFFFFFFFFFFFFFFFFFFFFFFFFFFFFFFFFFFFFFFFFFFFFFFFFFFFFFFFFFFFFFFFFFF:FFFFFFFFFFFFFFFFFFFFFFFFF  
@A00155:342:HHGFNDSXY:1:2476:26196:7373 2:N:0:GAACCTAG+TCCGCATA  
TCAGGTAGCCTACTAGACTACGACTTACACGGTAGGTCTGTGAACAAGCCCGGAGTACATCTCCTTTGG  
AACTAGGAGACCCCTCCGGTCTTGTCACACCTCTGTTTCGGCAGAGGATACCGTGCTCCACAGCTGTA  
+  
FFFFFFFFFFFFFFFFFFFFFFFFFFFFFFFFFFFFFFFFFFFFFFFFFFFFFFFFFFFFFFFFFFFFFFFFF:FFFFFFFFFFFFFFFFFFFFFFFFFFFFFFFFF  
F:FFF:FFFFFFFFFFFFFFFFFFFF:FFFFFFFFFFFFFFFFFFFFFFFFFFFFFFFFFFFFFFFFFFFFFFFFFFFFFFFFFFFFFFFFFFFFFFFFF  
@A00155:342:HHGFNDSXY:1:2476:26096:7670 2:N:0:GAACCTAG+TCCGCATA  
TCAGGTAGCCTACTAGACTACGACTTACACGGTAGGTCTGTGAACAAGCCCGGAGTACATCTCCTTTGG  
AACTAGGAGACCCCTCCGGTCTTGTCACACCTCTGTTTCGGCAGAGGATACCGTGCTCCACAGCTGTA  
+  
FFFFFFFFFFFFFFFFFFFFFFFFFFFFFFFFFFFFFFFFFFFFFFFFFFFFFFFFFFFFFFFFFFFFFFFFF:FFFFFFFFFFFFFFFFFFFFFFFFFFFFFFFFF  
FFFFFFFFFFFFFFFFFFFFFFFFFFFFFFFFFFFFFFFFFFFFFFFFFFFFFFFFFFFFFFFFFFFFFFFFF:FFFFFFF  
@A00155:342:HHGFNDSXY:1:2476:22978:7811 2:N:0:GAACCTAG+TCCGCATA  
GTTTCGTCTTGGAACGGACTCATCAGGGAGCCTACTAGACTCCGACCGTCATGGGGGTTCAAACCCA  
TGCCCCGCCACACCGCCTTAGATCAGCTGTGTCCACTTAAGGACTCACCTCTGGCCTATGGTCATCTC  
+  
FFFFFFFFFFFFFFFFFFFFFFFFFFFFFFFFFFFFFFFFFFFFFFFFFFFFFFFFFFFFFFFFFFFFFFFFF:FFFFFFFFFFFFFFFFFFFFFFFFFFFFFFFFF  
FFFFFFFFFFFFFFFFFFFFFFFFFFFFFFFFFFFFFFFFFFFFFFFFFFFFFFFFFFFFFFFFFFFFFFFFF:FFFFFFF  
@A00155:342:HHGFNDSXY:1:2476:21414:11428 2:N:0:GAACCTAG+TCCGCATA  
GTTTCGTCTTGGAACGGACTCATCAGGGAGCCTACTAGACTCCGACCGTCATGGGGGTTCAAACCCA  
TGCCCCGCCACACCGCCTTAGATCAGCTGTGTCCACTTAAGGACTCACCTCTGGCCTATGGTCATCTC  
+  
FF,FFFFFFFFFFFFFF:FFFFFFFFFFFFFFFFFFFFFFFFFFFFFFFFFFFFFFFFFFFFFFFFFFFFFFFFF  
FFFFFFFFFFFFFFFFFFFFFFFFFFFFFFFFFFFFFFFFFFFFFFFFFFFFFFFFFFFFFFFFFFFFFFFFF:FFFFFFFFFFFFFFFFFFFFFFFFFFFFFFFFF  
@A00155:342:HHGFNDSXY:1:2476:14696:16454 2:N:0:GAACCTAG+TCCGCATA  
CACGGTAGGTCTGTGAACAAGCCCGGAGTACATCTCCTTTGGAAGTACAGAGACCCCTCCGGTCTTGTC  
AACCTCTGTTTCGGCAGAGGATACCGTGCTCCACAGCTGTAAGGCTGTGGGCCCGAGAGAAGTCGCTC  
+  
FFFFFFFFFFFFFFFFFFFFFFFFFFFFFFFFFFFFFFFFFFFFFFFFFFFFFFFFFFFFFFFFFFFFFFFFF:FFFFFFFFFFFFFFFFFFFFFFFFFFFFFFFFF  
FFFFFFFFFFFFFFFFFFFFFFFFFFFFFFFFFFFFFFFFFFFFFFFFFFFFFFFFFFFFFFFFFFFFFFFFF:FFFFFFFFFFFFFFFFFFFFFFFFFFFFFFFFF  
@A00155:342:HHGFNDSXY:1:2476:1045:31923 2:N:0:GAACCTAG+TCCGCATA  
GGACTCGTCAGGTAGCCTACTAGACTACGACTTACACGGTAGGTCTGTGAACAAGCCCGGAGTACATCT  
CCTTTGGAAGTACAGAGACCCCTCCGGTCTTGTCACACCTCTGTTTCGGCAGAGGATACCGTGCTCCAC  
+  
FFFFFFFFFFFFFFFFFFFFFFFFFFFFFFFFFFFFFFFFFFFFFFFFFFFFFFFFFFFFFFFFFFFFFFFFF:FFFFFFFFFFFFFFFFFFFFFFFFFFFFFFFFF  
FFFFFFFFFFFFFFFFFFFFFFFFFFFFFFFFFFFFFFFFFFFFFFFFFFFFFFFFFFFFFFFFFFFFFFFFF:FFFFFFFFFFFFFFFFFFFFFFFFFFFFFFFFF  
@A00155:342:HHGFNDSXY:1:2477:10438:6449 2:N:0:GAACCTAG+TCCGCATA  
GGAACGGACTCATCAGGGAGCCTACTAGACTCCGACCGTCATGGGGGTTCAAACCCATGCCCCACCAC

ACCGCCTTAGATCAGCTGTGTCCACTTAAGGACTCACCTCTGGCCTATGGTCATCTCAATGCCGAGAG  
+  
FFFFFFFFFFFFFFFFFFFFFFFFFFFFFFFFFFFFFFFFFFFFFFFFFFFFFFFFFFFFFFFFFFFFFFFF  
FFFFFFFFFFFFFFFFFFFFFFFFFFFFFFFFFFFFFFFFFFFFFFFFFFFFFFFFFFFFFFFFFFFFFFFF  
@A00155:342:HHGFNDSXY:1:2477:29306:35493 2:N:0:GAACCTAG+TCCGCATA  
ACACGGTAGGTCGTGAACAAGCCCGAGTACATCTCCTTTGGAAGTAGGAGACCCCTCCGGTCTTGTC  
CAACCTCTGTTTCGGCAGAGGATACCGTGCTCCACAGCTGTAAGGCTGTGGGCCCGAGAGAAGTCGCT  
+  
FFFFFFFFFFFFFFFFFFFFFFFFFFFFFFFFFFFFFFFFFFFFFFFFFFFFFFFFFFFFFFFFFFFFFFFF  
FFFFFFFFFFFFFFFFFFFFFFFFFFFFFFFFFFFFFFFFFFFFFFFFFFFFFFFFFFFFFFFFFFFFFFFF  
@A00155:342:HHGFNDSXY:1:2478:29740:9815 2:N:0:GAACCTAG+TCCGCATA  
GCCCCGAGTACATCTCCTTTGGAAGTAGGAGACCCCTCCGGTCTTGTCACACCTCTGTTTCGGCAGAG  
GATACCGTGCTCCACAGCTGTAAGGCTGTGGGCCCGAGAGAAGTCGCTCTCTCTCGCCCTCCACATCC  
+  
FFFFFFFFFFFFFFFFFFFFFFFFFFFFFFFFFFFFFFFFFFFFFFFFFFFFFFFFFFFFFFFFFFFFFFFF  
FFFFFFFFFFFFFFFFFFFFFFFFFFFFFFFFFFFFFFFFFFFFFFFFFFFFFFFFFFFFFFFFFFFFFFFF  
@A00155:342:HHGFNDSXY:1:2478:13114:10394 2:N:0:GAACCTAG+TCCGCATA  
CTCTTCGAGTTGTGTAAGTTTCGTCTCTAAAAAGGACTCGTCAGGTAGCCTACTAGACTACGACTTACA  
CGGTAGGTCGTGAACAAGCCCGAGTACATCTCCTTTGGAACCAGGAGACCCCTCCGGTCTTGTCACAA  
+  
FFFFFFFFFFFFFFFFFFFFFFFFFFFFFFFFFFFFFFFFFFFFFFFFFFFFFFFFFFFFFFFFFFFFFFFF  
FFFFFFFFFFFFFFFFFFFFFFFFFFFFFFFFFFFFFFFFFFFFFFFFFFFFFFFFFFFFFFFFFFFFFFFF  
@A00155:342:HHGFNDSXY:1:2478:28637:19899 2:N:0:GAACCTAG+TCCGCATA  
GCCCCGAGTACATCTCCTTTGGAAGTAGGAGACCCCTCCGGTCTTGTCACACCTCTGTTTCGGCAGAG  
GATACCGTGCTCCACAGCTGTAAGGCTGTGGGCCCGAGAGAAGTCGCTCTCTCTCTCGCCCTCCACATCC  
+  
:FFFFFFFFFFFFFFFFFFFFFFFFFFFFFFFFFFFFFFFFFFFFFFFFFFFFFFFFFFFFFFFFFFFFFFFF  
FFFFFFFFFFFFFFFFFFFFFFFFFFFFFFFFFFFFFFFFFFFFFFFFFFFFFFFFFFFFFFFFFFFFFFFF  
@A00155:342:HHGFNDSXY:1:2502:17752:5525 2:N:0:GAACCTAG+TCCGCATA  
GGTCTTGTCACACCTCTGTTTCGGCAGAGGATACCGTGCTCCACAGCTGTAAGGCTGTGGGCCCGAGA  
GAAGTCGCTCTCTCTCGCCCTCCACATCCCTCTCGGCATAGAGATGACCATAGGCCAGAG  
+  
FFFFFFFFFFFFFFFFFFFFFFFFFFFFFFFFFFFFFFFFFFFFFFFFFFFFFFFFFFFFFFFFFFFFFFFF  
FF:FFFFFFFFFFFFFFFFFFFFFFFFFFFFFFFFFFFFFFFFFFFFFFFFFFFFFFFFFFFFFFFFFFFF  
@A00155:342:HHGFNDSXY:1:2502:10890:9111 2:N:0:GAACCTAG+TCCGCATA  
GCCTACTAGACTACGACTTACACGGTAGGTCGTGAACAAGCCCGAGTACATCTCCTTTGGAAGTAGG  
AGACCCCTCCGGTCTTGTCACACCTCTGTTTCGGCAGAGGATACCGTGCTCCACAGCTGTAAGGCTGT  
+  
FFFF:FFFFFFFFFFFFFFFFFFFFFFFFFFFFFFFFFFFFFFFFFFFFFFFFFFFFFFFFFFFFFFFF:F  
:FFFFFF:FF:FFF:FFFFFFFFFFFFFFFFFFFFFFFFFFFFFFFFFFFFFFFFFFFFFFFFFFFFFFF  
@A00155:342:HHGFNDSXY:1:2502:8241:10285 2:N:0:GAACCTAG+TCCGCATA  
GTGAACAAGCCCGAGTACATCTCCTTTGGAAGTAGGAGACCCCTCCGGTCTTGTCACACCTCTGTTT  
CGGCAGAGGATACCGTGCTCCACAGCTGTAAGGCTGTGGGCCCGAGAGAAGTCGCTCTCTCTCGCCCT  
+  
FFFFFFFFFFFFFFFFFFFFFFFFFFFFFFFFFFFFFFFFFFFFFFFFFFFFFFFFFFFFFFFFFFFFFFFF  
FFFFFFFFFFFFFFFFFFFFFFFFFFFFFFFFFFFFFFFFFFFFFFFFFFFFFFFFFFFFFFFFFFFFFFFF  
@A00155:342:HHGFNDSXY:1:2503:28836:12289 2:N:0:GAACCTAG+TCCGCATA  
TAGGTCGTGAACAAGCCCGAGTACATCTCCTTTGGAAGTAGGAGACCCCTCCGGTCTTGTCACACCT  
CTGTTTCGGCAGAGGATACCGTGCTCCACAGCTGTAAGGCTGTGGGCCCGAGAGAAGTCGCTCTCTCT  
+  
FFFFFFFFFFFFFFFFFFFFFFFFFFFFFFFFFFFFFFFFFFFFFFFFFFFFFFFFFFFFFFFFFFFFFFFF  
FFFFFFFFFFFFFFFFFFFFFFFFFFFFFFFFFFFFFFFFFFFFFFFFFFFFFFFFFFFFFFFFFFFFFFFF  
@A00155:342:HHGFNDSXY:1:2503:17110:21950 2:N:0:GAACCTAG+TCCGCATA  
GAGACCCCTCCGGTCTTGTCACACCTCTGTTTCGGCAGAGGATACCGTGCTCCACAGCTGTAAGGCTG



TGGGCCCCGAGAGAAGTCGCTCTCTCTCGCCCTCCACATCCCTCTCGGCATTGAGATGACCATAG  
+  
FFFFFFFFFFFFFFF:FFFFFFFFFFFFFFFFFFFFFFFFFFFF:FFFFFFFF,FFFF:FFFF:FFFFFFFFFF  
FFFFFFFFFFFFFFF::FFFF:FFFFFFFFFFFFFFFFFFFFFFFFFFFFFFFFFFFFF:FFF,F:F:FF  
@A00155:342:HHGFNDSXY:1:2503:23565:32377 2:N:0:GAACCTAG+TCCGCATA  
GGAGTACATCTCCTTTGGAAGTAGGAGACCCCTCCGGTCTTGCCAACCTCTGTTTCGGCAGAGGATA  
CCGTGCTCCACAGCTGTAAGGCTGTAGGCCCGAGAGAAGTCGCTCTCTCTCGCCCTCCACATCCCTCT  
+  
FFFFFFFFFFFFFFFFFFFFFFFFFFFFFFFFFFFFFFFFFFFFFFFFFFFFFFFFFFFFFFFF:FFFFFFFF  
FFFFFFFFFFFFFFF,F:,FFFFFFFFFFFFFFFFFFFFFFFFFFFFFFFFFFFFFFFFFFFFFFFFFFFFF  
@A00155:342:HHGFNDSXY:1:2504:21757:1407 2:N:0:GAACCTAG+TCCGCATA  
CCTCCGGTCGTGTCCAACCTCTGTTTCGGCAGAGGATAACCGTGCTCCACAGCTGTAAGGCTGTGGCC  
CGAGAGAAGTCGCTCTCTCTCGCCCTCCACATCCCTCTCGGCATTGAGATGACCATAGGCCAG  
+  
FF:FFFF:F,FFFFFFFFFFFFFFF:FFFFFFFFFFFFFFFFFFFFFFFFFFFFFFFFFFFF,FFFFFF:FFFFFFFF  
FFFFFFFFFFFFFFFFFFFFFFFFFFFFFFFFFFFFFFFFFFFFFFFFFFFFFFFFFFFFFFFFFFFFFFFFFFFFF  
@A00155:342:HHGFNDSXY:1:2504:20030:13166 2:N:0:GAACCTAG+TCCGCATA  
GGAGTACATCTCCTTTGGAAGTAGGAGACCCCTCCGGTCTTGCCAACCTCTGTTTCGGCAGAGGATA  
CCGTGCTCCACAGCTGTAAGGCTGTGGGCCCGAGAGAAGTCGCTCTCTCTCGCCCTCTACATCCCTCT  
+  
FFFFFFFFFFFFFFFFFFFFFFFFFFFFFFFFFFFFFFFFFFFFFFFFFFFFFFFFFFFFFFFFFFFFFFFFFFFFF  
FFFFFFFFFFFFFFFFFFFFFFFFFFFFFFFFFFFFFFFFFFFFFFFFFFFFFFFFFFFFFFFFFFFFFFFFFFFFF  
@A00155:342:HHGFNDSXY:1:2504:24370:14700 2:N:0:GAACCTAG+TCCGCATA  
ACCCCTCCGGTCTTGCCAACCTCTGTTTCGGCAGAGGATAACCGTGCTCCACAGCTGTAAGGCTGTGG  
GCCCAGAGAGAAGTCGCTCTCTCTCGCCCTCCACATCCCTCTCGGCATTGAGATGACCATAGGCCAG  
+  
FFFFFFFFFFFFFFF,FFFFFFFFFFFFFFFFFFFFFFFFFFFFFFFFFFFFFFFFFFFFFFFFFFFFFFFFFFFFF  
FFFFFFFFFFFFFFFFFFFFFFFFFFFFFFFFFFFFFFFFFFFFFFFFFFFFFFFFFFFFFFFFFFFFFFFFFFFFF  
@A00155:342:HHGFNDSXY:1:2504:18059:16517 2:N:0:GAACCTAG+TCCGCATA  
GTGTGGCGGGGCATGGGTTTGAACCCCATGACGGTCGGAGTCTAGTAGGCTCCCTGATGAGTCCGTT  
CCAAGGACGAAACCGTCGTTACTCTTCGAGTTGTGTAAGTTTCGTCTAAAAAGGACTCGTCAGGTAG  
+  
FFFFFFFF:FFFFFFFF,F,FFFFFFFFF:F,FFFFFFFFFFFFFFFFFFFFFFFFFFFFFFFFFFFF:FFFFF  
FF:FFFFFFFFFFFFFFFFFFFFFFFFFFFFFFFF,F:FFFF:FFF:,FFFF:FFFFFFFFFFFFFFFF:FFF,F  
@A00155:342:HHGFNDSXY:1:2504:23439:19758 2:N:0:GAACCTAG+TCCGCATA  
TCGTCAGGTAGCCTACTAGACTACGACTTACACGGTAGGTCGTGAACAAGCCCGAGTACATCTCCTT  
TGGAAGTAGGAGACCCCTCCGGTCTTGCCAACCTCTGTTTCGGCAGAGGATAACCGTGCTCCAC  
+  
FF:FFFFFFFFFFFFFFFF:F:FF:FFFFFFFFFFFFFFFF,FFFF:FFFF:F,:FFF:FFFFFFFF:  
F,FF:FF,F:FFFF,FFF:F:FFFF,:,FFFFFFFFF:FFF::F,FFFF:FFF,:FFFFFFF  
@A00155:342:HHGFNDSXY:1:2504:4698:25661 2:N:0:GAACCTAG+TCCGCATA  
TTACACGGTAGGTCGTGAACAAGCCCGAGTACATCTCCTTTGGAACCAGGAGACCCCTCCGGTCTTG  
TCCAACCTCTGTTTCGGCAGAGGATAACCGTGCTCCACAGCTGTAAGGCTGTGGGCCCGAGAGAAGTCG  
+  
FFFFFFFF,FFFFFFFFFFFFFFFFFFFFFFFFFFFFFFFF:FFFFFFFFFFFF,FFFFFFFFFFFFFFFFFFFF,FF  
FFF,FFFFFFFFFFFFFFFFFFFFFFFFFFFFFFFFFFFFFFFFFFFFFFFFFFFFF,FFFF:FFFFFFFFFFFFFFFF  
@A00155:342:HHGFNDSXY:1:2505:21676:6590 2:N:0:GAACCTAG+TCCGCATA  
TAGATCAGCTGTGTCACTTAAGGACTCACCTCTGGCCTATGGTCATCTCAATGCCGAGAGGGATGTG  
GAGGGCGAGAGAGAGCGACTTCTCTCGGGCCACAGCCTTACAGCTGTGGAGCACGGTATCCTCTGCC  
+  
FFFFFFFFFFFFFFFFFFFFFFFFFFFFFFFF,FFFFFFFFFFFFFFFFFFFFFFFFFFFFFFFFFFFFFFFFFFFFF  
FFFFFFFFFFFFFFFFFFFFFFFFFFFFFFFFFFFFFFFFFFFFFFFFFFFFFFFFFFFFFFFFFFFFF,FFFFFFFF  
@A00155:342:HHGFNDSXY:1:2505:5113:16642 2:N:0:GAACCTAG+TCCGCATA  
AGGACGAAACCGTCGTTACTCTTCGAGTTGTGTAAGTTTCGTCCTAAAAAGGACTCGTCAGGTAGCCT

ACTAGACTACGACTTACACGGTAGGTCTGTGAACAAGCCCGGAGTACATCTCCTTTGGAAGT

AGGAGAC  
+  
FFFFFFFFF:FFFFFFFFFFFFFFFFFFFFFFFFFFFFFFFFFFFFFFFFFFFFFFFFFFFFFFFFFFFFF:FF,FFFFFFFFF,FFFFFFFFF  
FFFFFFFFFFFFFFFFFFFFFFFFFFFFFFFFFFFFFFFFFFFFFFFFFFFFFFFFFFFFFFFF:F::FFFFFFFFFFFFFFFFFFFFFFFFFFFFF  
@A00155:342:HHGFNDSXY:1:2505:31096:35556 2:N:0:GAACCTAG+TCCGCATA  
GAAACCGTCGTTACTCTTAGAGTTGTGTAAGTTTCGTCCTAAAAAGGACTCGTCAGGTAGCCTACTAG  
ACTACGACTTACACGGTAGGTCTGTGAACAAGCCCGGAGTACATCTCCTTTGGAAGTAGGAGACCCCTC  
+  
FFFFFFFFFFFFFFFFF:FFFFFFFFFFFFFFFFF:FFFFFFFFFFFFFFFFFFFFFFFFFFFFFFFFFFFFFFFFFFFFFFFFFFFFFFFFFFFFF  
FFFFFFFFFFFFFFFFFFFFFFFFFFFFFFFFFFFFFFFFFFFFFFFFFFFFFFFFFFFFFFFFFFFFFFFFFFFFFFFFFFFFFFFFFFFFFFFFFFFFF  
@A00155:342:HHGFNDSXY:1:2506:24198:13056 2:N:0:GAACCTAG+TCCGCATA  
AACGGACTCATCAGGGAGCCTACTAGACTCCGACCGTCATGGGGGTTCAAACCCATGCCCGGCCACAC  
CGCCTTAGATCAGCTGTGTCCAATTAAAGACTCACCTCTGGCCTATGGTCATCTCAATGCCGAGAGGG  
+  
F:F:FFFFFFFFFFFFFFFFFFFFFFFFF:FFFFFFFFFFFFFFFFFFFFFFFFFFFFFFFFFFFFFFFFFFFFFFFFFFFFFFFFFFFFF:FFF:FFFFFFFFF:FF  
::FFFFFFFFFFFFFFFFF:FFFFFF:FFFFFFFFFFFFFFFFFFFFFFFFF:FFFFF:F,FFFFFFFFF:FFFFFFFFF,F  
@A00155:342:HHGFNDSXY:1:2506:6940:14074 2:N:0:GAACCTAG+TCCGCATA  
ACTTACACGGTAGGTCTGTGAACAAGCCCGGAGTACATCTCCTTTGGAACCAGGAGACCCCTCCGGTCT  
TGTC AACCTCTGTTTCGGCAGAGGATACCGTGCTCCACAGCTGTAAGGCTGTGGGCCCGAGAGAAGT  
+  
FFFFFFFFFFFFFFFFFFFFFFFFFFFFFFFFFFFFFFFFFFFFFFFFFFFFFFFFFFFFFFFFFFFFFFFFFFFFFFFFFFFFFFFFFFFFFFFFFFFFF  
FFFFFFFFFFFFFFFFFFFFFFFFFFFFFFFFFFFFFFFFFFFFFFFFFFFFFFFFFFFFFFFFFFFFFFFFFFFFFFFFFFFFFFFFFFFFFFFFFFFFF  
@A00155:342:HHGFNDSXY:1:2506:13458:15436 2:N:0:GAACCTAG+TCCGCATA  
CTTTGGAACCAGGAGACCCCTCCGGTCTTGTC AACCTCTGTTTCGGCAGAGGATACCGTGCTCCACA  
GCTGTAAGGCTGTGGGCCCGAGAGAAGTCGCTCTCTCTCGCCCTCCACATCCCTCTCGGCATTGAGAT  
+  
FFFFFFFFFFFFFFFFFFFFFFFFFFFFFFFFFFFFFFFFFFFFFFFFFFFFFFFFFFFFFFFFFFFFFFFFFFFFFFFFFFFFFFFFFFFFFFFFFFFFF  
FFFFFFFFFFFFFFFFFFFFFFFFFFFFFFFFFFFFFFFFFFFFFFFFFFFFFFFFFFFFFFFFFFFFFFFFFFFFFFFFFFFFFFFFFFFFFFFFFFFFF  
@A00155:342:HHGFNDSXY:1:2506:17372:16391 2:N:0:GAACCTAG+TCCGCATA  
GTGAACAAGCCCGGAGTACATCTCCTTTGGAAGTAGGAGACCCCTCCGGTCTTGTC AACCTCTGTTTC  
CGGCAGAGGATACCGTGCTCCACAGTTGTAAGGCTGTGGGCCCGAGAGAAGTCGCTCTCTCTCGCC  
+  
FFFFFFFFFFFFFFFFFFFFFFFFFFFFFFFFFFFFFFFFFFFFFFFFFFFFFFFFFFFFFFFFFFFFFFFFFFFFFFFFFFFFFFFFFFFFFFFFFFFFF  
FFFFFFFFFFFFFFFFFFFFFFFFFFFFFFFFFFFFFFFFFFFFFFFFFFFFFFFFFFFFFFFFFFFFFFFFFFFFFFFFFFFFFFFFFFFFFFFFFFFFF  
@A00155:342:HHGFNDSXY:1:2506:10348:25739 2:N:0:GAACCTAG+TCCGCATA  
GTGTAAGTTTCGTCCTAAAAAGGACTCGTCAGGTAGCCTACTAGACTACGACTTACACGGTAGGTCTGT  
GAACAAGCCCGGAATACATCTCCTTTGGAAGTAGGAGACCCCTCCGGTCTTGTC AACCTCTGTTTCG  
+  
FFFFFFFFFFFFFFFFFFFFFFFFFFFFFFFFFFFFFFFFFFFFFFFFFFFFFFFFFFFFFFFFFFFFFFFFFFFFFFFFFFFFFFFFFFFFFFFFFFFFF  
FFFFFFF:F:FFFFFFFFFFFFFFF::FFFFFFF:FFFFFFFFFFFF:FFF:FFFFFFFFFFFFFFFFFFFFFFFFF:FFFFFFF  
@A00155:342:HHGFNDSXY:1:2506:11749:27602 2:N:0:GAACCTAG+TCCGCATA  
AGCCCGGAGTACATCTCCTTTGGAAGTAGGAGACCCCTCCGGTCTTGTC AACCTCTGTTTCGGCAGA  
GGATACCGTGCTCCACAGCTGTAAGGCTGTGGGCCCGAGAGAAGTCGCTCTCTCTCGCCCTCCACATC  
+  
FFFFFFFFFFFFFFFFFFFFFFFFFFFFFFFFFFFFFFFFFFFFFFFFFFFFFFFFFFFFFFFFFFFFFFFFFFFFFFFFFFFFFFFFFFFFFFFFFFFFF  
FFFFFFFFFFFFFFFFFFFFFFFFFFFFFFFFFFFFFFFFFFFFFFFFFFFFFFFFFFFFFFFFFFFFFFFFFFFFFFFFFFFFFFFFFFFFFFFFFFFFF  
@A00155:342:HHGFNDSXY:1:2507:4435:2440 2:N:0:GAACCTAG+TCCGCATA  
GTAGCCTACTAGACTACGACTTACACGGTAGGTCTGTGAACAAGCCCGGAGTACATCTCCTTTGGAAGT  
AGGAGACCCCTCCGGTCTTGTC AACCTCTGTTTCGGCAGAGGATACCGTGCTCCACAGCTGTAAGGC  
+  
FFFFFFF,FFFFFFFFFFFFFFFFFFFFFFFFF:FFFFFFFFFFFFFFFFF:FFFFFFFFF:FFFFFFFFFFFFFFFFF  
FFFFFFFFF:FF:FFFFFFF,FFFFFFFFFFFFFFFFF:FFFFFFFFFFFFFFFFF:FFFFFFFFFFFFFFFFF:FFF:  
@A00155:342:HHGFNDSXY:1:2507:16812:14888 2:N:0:GAACCTAG+TCCGCATA  
GGTAGCCTACTAGACTACGACTTACACGGTAGGTCTGTGAACAAGCCCGGAGTACATCTCCTTTGGAAC

[illegible]

GTAGGTCGTGAACAAGCCCGAGTACATCTCCTTTGGAAGTAGGAGACCCTCCGGTCTTGCCAAC  
+  
FFFFFFFFFFFFFFFFFFFFFFFFFFFFF:FFFFFFFFFFFFFFFFF:FFFFFFFFFFFFFFFFFFFFFFF  
FFFFFFFFFFFFFFFFFFFFFFFFFFFFFFFFF:FFFFFFFFFFFFFFFFF:FFFFFFFFFFFFFFFFFFFFFFF  
@A00155:342:HHGFNDSXY:1:2510:29017:35994 2:N:0:GAACCTAG+TCCGCATA  
TACGACTTACACGGTAGGTCGTGAACAAGCCCGAGTACATCTCCTTTGGAAGTAGGAGACCCTCCG  
GTCTTGTCCAACCTCTGTTTCGGCAGAGGATACCGTGCTCCACAGCTGTAAGGCTGTGGGCCCGAGAG  
+  
FFFFFFFFFFFFFFFFFFFFFFFFFFFFF:FFFFFFFFFFFFFFFFF:FFFFFFFFFFFFFFFFFFFFFFF  
FFFFF:FFFFFFFFFFFFFFFFF:FFFFFFFFFFFFFFFFF:FFFFFFFFFFFFFFFFF:FFFFFFFFFFFFFFF  
@A00155:342:HHGFNDSXY:1:2511:29071:5243 2:N:0:GAACCTAG+TCCGCATA  
TACGACTTACACGGTAGGTCGTGAACAAGCCCGAGTACATCTCCTTTGGAAGTAGGAGACCCTCCG  
GTCTTGTCCAACCTCTGTTTCGGCAGAGGATACCGTGCTCCACAGCTGTAAGGCTGTGGGCCCG  
+  
F,FFFFFFFFFFFFFFFFFFFFFFFFFFFFF:FFFFFFF::FFFFFFFFFFFFFFF  
FFF,FFFFFFFFFFFFFFFFFFFFFFFFFFFFF:FFFFFFFFFFFFFFFFF:FFFFFFFFFFFFFFF  
@A00155:342:HHGFNDSXY:1:2511:2962:7654 2:N:0:GAACCTAG+TCCGCATA  
CCTACTAGACTACGACTTACACGGTAGGTCGTGAACAAGCCCGAGTACATCTCCTTTGGAAGTAGGA  
GACCCCTCCGGTCTTGCCAACCTCTGTTTCGGCAGAGGATACCGTGCTCCACAGCTGTAAGGCTGTG  
+  
FFFFFFFFFFFFFFFFFFFFFFFFFFFFF:FFFFFFFFFFFFFFFFF:FFFFFFFFFFFFFFF  
FFFFFFFFFFFFFFFFFFFFFFFFFFFFF,FFFFFFFFFFFFFFFFF:FFFFFFFFFFFFFFF  
@A00155:342:HHGFNDSXY:1:2511:29062:24424 2:N:0:GAACCTAG+TCCGCATA  
CAAGGACGAAACCGTCGTTACTCTACGAGTTGTGTAAGTTTCGTCCTAAAAGGACTCGTCAGGTAGC  
CTACTAGACTACGACTTACACGGTAGGTCGTGAACAAGCCCGAGTACATCTCCTTTGGAAGTAGGAG  
+  
FFFFF:FFFFFFFFFFFFFFFFFFFFFFFFFFFFF:FFFFFFFFFFFFFFF:FFFFF  
FFFFFFFFFFFFFFFFFFFFFFFFFFFFF:FFFFFFFFFFFFFFFFF:FFFFFFFFFFFFFFF  
@A00155:342:HHGFNDSXY:1:2511:31186:30859 2:N:0:GAACCTAG+TCCGCATA  
AAAAAGGACTCGTCAGGTAGCCTACTAGACTACGACTTACACGGTAGGTCGTGAACAAGCCCGAGTA  
CATCTCCTTTGGAAGTAGGAGACCCTCCGGTCTTGCCAACCTCTGTTTCGGCAGAGGATACCGTGC  
+  
FFFFFFFFFFFFFFFFFFFFFFFFFFFFF:FFF:FFFFFFFFFFFFFFFFF:FFFFFFFFFFFFFFF  
FFF:FFFFFFFFF:FFFFFFFFFFFFFFFFF,FFFFFFFFFFFFFFFFF:FFFFFFFFFFFFFFF:  
@A00155:342:HHGFNDSXY:1:2511:19840:33411 2:N:0:GAACCTAG+TCCGCATA  
AAAAGGACTCGTCAGGTAGCCTACTAGACTACGACTTACACGGTAGGTCGTGAACAAGCCCGAGTAC  
ATCTCCTTTGGAAGTAGGAGACCCTCCGGTCTTGCCAACCTCTGTTTCGGCAGAGGATACCGTGCT  
+  
FFFFFFFFFFFFFFFFFFFFF:FFFFFFFFFFFFFFFFF:FFFFFFFFFFFFFFF:FFFFFFFFF  
FFFFF:FFFFFFFFF:FFFFFFFFFFFFFFF:FFFFFFFFFFFFFFF:FFFFFFFFFFFFFFF:FFFFF  
@A00155:342:HHGFNDSXY:1:2511:7229:35618 2:N:0:GAACCTAG+TCCGCATA  
GGTCTTGTCCAACCTCTGTTTCGGCAGAGGATACCGTGCTCCACAGCTGTAAGGCTGTGGGCCCGAGA  
GAAGTCGCTCTCTCGCCCTCACATCCCTCTCGGCATTGAGATGACCATAGGCCAGAG  
+  
FFFFFFFFFFFFFFFFFFFFFFFFFFFFF:FFFFFFFFFFFFFFF:FFFFFFFFFFFFFFF  
FFFFFFFFFFFFFFFFFFFFFFFFFFFFF,FFFFFFFFF:FFFFFFFFF  
@A00155:342:HHGFNDSXY:1:2514:19407:6762 2:N:0:GAACCTAG+TCCGCATA  
TGAACAAGCCCGAGTACATCTCCTTTGGAACCAGGAGACCCTCCGGTCTTGCCAACCTCTGTTTC  
GGCAGAGGATACCGTGCTCCACAGCTGTAAGGCTGTGGGCCCGAGAGAAGTCGCTCTCTCGCCCTC  
+  
FFFFFFFFFFFFFFFFFFFFFFFFFFFFF:FFFFFFFFFFFFFFFFF:FFFFFFFFFFFFFFF  
FFFFFFFFFF,F,FFFFFFFFFFFFFFFFF:FFFFFFFFF:FFFFFFFFFFFFFFF  
@A00155:342:HHGFNDSXY:1:2514:19931:26647 2:N:0:GAACCTAG+TCCGCATA  
ACGACTTACACGGTAGGTCGTGAACAAGCCCGAGTACATCTCCTTTGGAAGTAGGAGACCCTCCGG

TCTTGTCCAACCTCTGTTTCGGCAGAGGATACCGTGCTCCACAGCTGTAAGGCTGTGGGCCCCGAGAGA  
+  
FFFFFFFFFFFFFFFFFFFFFFFFFFFFFFFFFFFFFFFFFFFFFFFFFFFFFFFFFFFFFFFFFFFFFFFF  
FFFFFFFFFFFFFFFFFFFFFFFFFFFFFFFFFFFFFFFFFFFFFFFFFFFFFFFFFFFFFFFFFFFFFFFF  
@A00155:342:HHGFNDSXY:1:2514:16043:34538 2:N:0:GAACCTAG+TCCGCATA  
CTTCTCTCGGGCCCACAGCCTTACAGCTGTGGAGCACGGTATCCTCTGCCGAAACAGAGGTTGGACAA  
GACCGGAGGGGTCTCCTGGTTCCAAAGGAGATGTACTCCGGGCTTGTTACAGACCTACCGTGTAAGTC  
+  
FFFFFFFFFFFFFFFFFFFFFFFFFFFFFFFFFFFFFFFFFFFFFFFFFFFFFFFFFFFFFFFFFFFFFFFF  
FFFFFFFFFFFFFFFFFFFFFFFFFFFFFFFFFFFFFFFFFFFFFFFFFFFFFFFFFFFFFFFFFFFFFFFF  
@A00155:342:HHGFNDSXY:1:2515:17390:22905 2:N:0:GAACCTAG+TCCGCATA  
AGTACATCTCCTTTGGAACCAGGAGACCCCTCCGGTCTTGTTCCAACCTCTGTTTCGGCAGAGGATAACC  
GTGCTCCACAGCTGTAAGGCTGTGGGCCCCGAGAGAAGTCGCTCTCTCTCGCCCTCCACATCCCTCTCG  
+  
:FFFFFFFFFFFFFFFFFFFFFFFFFFFFFFFFFFFFFFFFFFFFFFFFFFFFFFFFFFFFFFFFFFFFFFFF  
FFFFFFFFFFFFFFFFFFFFFFFFFFFFFFFFFFFFFFFFFFFFFFFFFFFFFFFFFFFFFFFFFFFFFFFF  
@A00155:342:HHGFNDSXY:1:2515:17436:24518 2:N:0:GAACCTAG+TCCGCATA  
ACCGTGCTCCACAGCTGTAAGGCTGTGGGCCCCGAGAGAAGTCGCTCTCTCTCGCCCTCCACATCCCTC  
TCGGCATTGAGATGACCATAGGCCAGAGGTGAGTCCTTAAGTGGACACAGCTGATATAAGG  
+  
FFFFF:FFFF:FFFFFFFFFFFFFFFFFFFFFFFFFFFFFFFFFFFFFFFFFFFFFFFFFFFFFFFFFFFF  
FFFFFFFFFFFFFFFFFFFFFFFFFFFFFFFFFFFFFFFFFFFFFFFFFFFFFFFFFFFFFFFFFFFFFFFF  
@A00155:342:HHGFNDSXY:1:2515:3531:25488 2:N:0:GAACCTAG+TCCGCATA  
GAGAGGGATGTGGAGGGCGAGAGAGAGCGACTTCTCTCGGGCCCACAGCCTTACAGCTGTGGAGCAGC  
GTATCCTCTGCCGAAACAGAGGTTGGACAAGACCGGAGGGGTCTCCTAGTTCCAAAGGAGATGTACTC  
+  
FFFFFFFFFFF:FFFFFFFFFFFFFFFFFFFFFFFFFFFFFFFFFFFFFFFFFFFFFFFFFFFFFFFFFFFF  
FFFFFFFFFFFFFFFFFFFFFFFFFFFFFFFFFFFFFFFFFFFFFFFFFFFFFFFFFFFFFFFFFFFFFFFF  
@A00155:342:HHGFNDSXY:1:2515:30029:31360 2:N:0:GAACCTAG+TCCGCATA  
CTCCACAGCTGTAAGGCTGTGGGCCCCGAGAGAAGTCGCTCTCTCTCGCCCTCCACATCCCTCTCGGCA  
TTGAGATGACCATAGGCCAGAGGTGAGTCCTTAAGTGGACACAGCTGATCTAAGGCGGTGTGGCG  
+  
FFFFFFFFFFFFFFFFFFFFF:FFFFFFFFFFFFFFFFFFFFFFFFFFFFFFFFFFFFFFFFFFFFFFFFFFFF  
:FFFFFFFFFFFFF,FFFFFFFFFFFFFFFFFFFFFFFFFFFFFFFFFFFFFFFFFFFFFFFFFFFFFFFF  
@A00155:342:HHGFNDSXY:1:2515:22218:36871 2:N:0:GAACCTAG+TCCGCATA  
AGGACGAAACCGTCGTTACTCTTCGAGTTGTGTAAGTTTCGTCCTAAAAAGGACTCGTCAGGTAGCCT  
ACTAGACTACGACTTACACGGTAGGTCGTGAACAAGCCCGAGTACATCTCCTTTGGAAGTACAGGAGAC  
+  
FFFFFFFFFFFFFFFFFFFFFFFFFFFFFFFFFFFFFFFFFFFFFFFFFFFFFFFFFFFFFFFFFFFFFFFF  
FFFFFFFFFFFFFFFFFFFFFFFFFFFFFFFFFFFFFFFFFFFFFFFFFFFFFFFFFFFFFFFFFFFFFFFF  
@A00155:342:HHGFNDSXY:1:2516:16025:6950 2:N:0:GAACCTAG+TCCGCATA  
GTGAACAAGCCCGGAGTACATCTCCTTTGGAAGTACAGAGACCCCTCCGGTCTTGTTCCAACCTCTGTTT  
CGGCAGAGGATACCGTGCTCCACAGCTGTAAGGCTGTGGGCCCCGAGAGAAGTCGCTCTCTCTCGCCCT  
+  
FFFFFFFFFFFFFFFFFFFFFFFFFFFFFFFFFFFFFFFFFFFFFFFFFFFFFFFFFFFFFFFFFFFFFFFF  
FFFF:FFFFFFFFFFFFFFFFFFFFFFFFFFFFFFFFFFFFFFFFFFFFFFFFFFFFFFFFFFFFFFFFFFFF  
@A00155:342:HHGFNDSXY:1:2516:21206:14450 2:N:0:GAACCTAG+TCCGCATA  
GTTTCGTCCTAAAAAGGACTCGTCAGGTAGCCTACTAGACTACGACTTACACGGTAGGTGCTGAACAA  
GCCCGGAGTACATCTCCTTTGGAAGTACAGAGACCCCTCCGGTCTTGTTCCAACCTCTGTTTCGGCAGAG  
+  
FFFFFFFFFFFFFFFFFFFFFFFFFFFFFFFFFFFFFFFFFFFFFFFFFFFFFFFFFFFFFFFFFFFFFFFF  
FFFFFFFFFFFFFFFFFFFFFFFFFFFFFFFFFFFFFFFFFFFFFFFFFFFFFFFFFFFFFFFFFFFFFFFF  
@A00155:342:HHGFNDSXY:1:2516:3405:20509 2:N:0:GAACCTAG+TCCGCATA  
GAAACCGTCGTTACTCTACGAGTTGTGTAAGTTTCGTCCTAAAAAGGACTCGTCAGGTAGCCTACTAG

ACTACGACTTACACGGTAGGTCGTGAACAAGCCCGGAGTACATCTCCTTTGGAAGTACAGAGACCCCTC  
+  
FF:FFFFFFFF:FFFFFFFF:FFFFF:FF:FFFFFFFFFFFFFFFFFFFFFFFFFFFFFFFFFFFFFFFF  
FFFFF,FFFFF:FFFF:F:FFFFFFFFFFFFFFFF:FFFFFFFFFFFFFFFFFFFFFFFFFFFFFFFF  
@A00155:342:HHGFNDSXY:1:2517:23529:1407 2:N:0:GAACCTAG+TCCGCATA  
TACGACTTACACGGTAGGTCGTGAACAAGCCCGGAGTACATCTCCTTTGGAAGTACAGAGACCCCTCCG  
GTCTTGTCCAACCTCTGTTTCGGCAGAGGATACCGTGCTCCACAGCTGTAAGGCTGTGGGCCCG  
+  
FFFFFFFFFFFFFFFFFFFFFFFFFFFFFFFFFFFFFFFFFFFFFFFFFFFFFFFFFFFFFFFFFFFFFFFF  
FFF:,F:FFFFFFFF:FFF,FFFF,F:FF:F:FFFFFFFF:FFFFFFF:FFF:FFFFFFFF  
@A00155:342:HHGFNDSXY:1:2517:3007:17440 2:N:0:GAACCTAG+TCCGCATA  
TAGGAGACCCCTCCGGTCTTGTCCAACCTCTGTTTCGGCAGAGGATACCGTGCTCCACAGCTGTAAGG  
CTGTGGGCCCGAGAGAAGTCGCTCTCTCTCGCCCTCCACATCCCTCTCGGCATTGAGATGAC  
+  
:FFFFFFFFFFFFFFFFFFFFFFFF,FFFFFFFF:FFFF:FFFFFF:FFFFFF:FFFFFF:FFFFFF  
FFFFFF:FFFFFFFF:FFFFFFFFFFFFFFFFFFFFFFFF, :FFFFFFFF:FFFFFFFF  
@A00155:342:HHGFNDSXY:1:2517:7726:18662 2:N:0:GAACCTAG+TCCGCATA  
AAAAGGACTCGTCAGGTAGCCTACTAGACTACGACTTACACGGTAGGTCGTGAACAAGCCCGGAGTAC  
ATCTCCTTTGGAAGTACAGAGACCCCTCCGGTCTTGTCCAACCTCTGTTTCGGCAGAGGATACCGTGCT  
+  
FFFFFFFFFFFFFFFFFFFFFFFFFFFFFFFFFFFFFFFFFFFFFFFFFFFFFFFFFFFFFFFFFFFFFFFF  
FFFFFFFFFFFFFFFFFFFFFFFFFFFFFFFFFFFFFFFFFFFFFFFFFFFFFFFFFFFFFFFFFFFFFFFF:FFF  
@A00155:342:HHGFNDSXY:1:2518:14696:3176 2:N:0:GAACCTAG+TCCGCATA  
AAGGACTCGTCAGGTAGCCTACTAGACTACGACTTACACGGTAGGTCGTGAACAAGCCCGGAGTACAT  
CTCCTTTGGAAGTACAGAGACCCCTCCGGTCTTGTCCAACCTCTGTTTCGGCAGAGGATACCGTGCTCC  
+  
FFFFFFFFFFFFFFFFFFFFFFFFFFFFFFFFFFFFFFFFFFFFFFFFFFFFFFFFFFFFFFFFFFFFFFFF  
FFFFFFFFFFFFFFFFFFFFFFFFFFFFFFFFFFFFFFFFFFFFFFFFFFFFFFFFFFFFFFFFFFFFFFFF:  
@A00155:342:HHGFNDSXY:1:2519:13015:8249 2:N:0:GAACCTAG+TCCGCATA  
TAGACTACGACTTACACGGTAGGTCGTGAACAAGCCCGGAGTACATCTCCTTTGGAAGTACAGAGACCC  
CTCCGGTCTTGTCCAACCTCTGTTTCGGCAGAGGATACCGTGCTCCACAGCTGTAAGGCTGTGGGCC  
+  
FFFFFFFFFFFFFFFFFFFFFFFFFFFFFFFFFFFFFFFFFFFFFFFFFFFFFFFFFFFFFFFFFFFFFFFF  
FFFFFFFFFFFFFFFFFFFFFFFFFFFFFFFFFFFFFFFF: :FFFFFFFFFFFFFFFFFFFFFFFFFFFFF  
@A00155:342:HHGFNDSXY:1:2519:2013:16595 2:N:0:GAACCTAG+TCCGCATA  
TAGACTACGACTTACACGGTAGGTCGTGAACAAGCCCGGAGTACATCTCCTTTGGAAGTACAGAGACCC  
CTCCGGTCTTGTCCAACCTCTGTTTCGGCAGAGGATACCGTGCTCCACAGCTGTAAGGCTGTGGGCC  
+  
FFFFFFFFFFFFFFFFFFFFFFFFFFFFFFFFFFFFFFFFFFFFFFFFFFFFFFFFFFFFFFFFFFFFFFFF: F  
FFFFFFFFFFFFF:FF:FFFFFFFFFFFF:FFFFFFFFFFFFFFFFFFFFFFFFFFFFF:FFFF:FFFFFFF  
@A00155:342:HHGFNDSXY:1:2519:26928:18881 2:N:0:GAACCTAG+TCCGCATA  
AAGGACGAAACCGTCGTTACTCTTCGAGTTGTGTAAGTTTCGTCCTAAAAAGGACTCGTCAGGTAGCC  
TACTAGACTACGACTTACACGGTAGGTCGTGAACAAGCCCGGAGTACATCTCCTTTGGAAGTACAGAGA  
+  
FFFFFFFFFFFFFFFFFFFFFFFFFFFFFFFFFFFFFFFFFFFFFFFF, :FFFFFFFFFFFF,FFFF:FF  
:FFFFFFFFFFFF:FFFFFFFFFFFFFFFFFFFFFFFFFFFFFFFFFFFFFFFF,FFFFFFFFFFFF  
@A00155:342:HHGFNDSXY:1:2519:9679:22701 2:N:0:GAACCTAG+TCCGCATA  
CCAAGGACGAAACCGTCGTTACTCTACGAGTTGTGTAAGTTTCGTCCTAAAAAGGACTCGTCAGGTAG  
CCTACTAGACTACGACTTACACGGTAGGTCGTGAACAAGCCCGGAGTACATCTCCTTTGGAAGTACAGGA  
+  
FFFFFFFFFFFFFFFFFFFFFFFFFFFFFFFFFFFFFFFFFFFFFFFFFFFFFFFFFFFFFFFFFFFFFFFF: F  
FFFFFFFFFFFFFFFFFFFFFFFFFFFFFFFFFFFFFFFFFFFFFFFFFFFFFFFFFFFFFFFF: FFFFFFFF  
@A00155:342:HHGFNDSXY:1:2519:12228:22983 2:N:0:GAACCTAG+TCCGCATA  
TTGGAAGTACAGAGACCCCTCCGGTCTTGTCCAACCTCTGTTTCGGCAGAGGATACCGTGCTCCACAGC

TGTAAAGGCTGTGGGCCCCGAGAGAAGTCGCTCTCTCGCCCTCCACATCCCTCTCGGCATTGAGATGA  
 +  
 FFFFFFFFFFFFFFFFFFFFFFFFFFFFFFFFFFFFFFFFFFFFFFFFFFFFFFFFFFFFFFFFFFFFFFFFFF:FFFFFFFFFFFFFFFF:FF  
 FFFFFFFFFFFFFFFFFFFFFFFFFFFFFFFFFFFFFFFFFFFFFFFFFFFFFFFFFFFFFFFFFFFFFFFFFF:FFFFFFFFFFFFFFFF:FFFFFFFF  
 @A00155:342:HHGFNDSXY:1:2520:7536:33520 2:N:0:GAACCTAG+TCCGCATA  
 AGGGAGCCTACTAGACTCCGACCGTCATGGGGGTTCAAACCCATGCCCCGCCACACCGCCTTAGATCA  
 GCTGTGTCCACTTAAGGACTCACCTCTGGCCTATGGTCATCTCAATGCCGAGAGGGATGTGGAGGGCG  
 +  
 FFFFFFFFFFFFFFFFFFFFFFFFFFFFFFFFFFFFFFFFFFFFFFFFFFFFFFFFFFFFFFFFFFFFFFFFFF  
 FFFFFFFFFFFFFFFFFFFFFFFFFFFFFFFFFFFFFFFFFFFFFFFFFFFFFFFFFFFFFFFFFFFFFFFFFF:FFFFFFFFFFFFFFFF  
 @A00155:342:HHGFNDSXY:1:2521:30454:4131 2:N:0:GAACCTAG+TCCGCATA  
 CTGGCCTATGGTCATCTCAATGCCGAGAGGGATGTGAAGGGCGAGAGAGAGCGACTTCTCTCGGGCCC  
 ACAGCCTTACAGCTGTGGAGCACGGTATCCTCTGCCGAAACAGAGTTGGACAAGACCGGAG  
 +  
 FFFFFFFFFFFFFFFFFFFFFFFFFFFFFFFFFFFFFFFFFFFFFFFFFFFFFFFFFFFFFFFFFFFFFFFFFF  
 FFFFFFFFFFFFFFFFFFFFFFFFFFFFFFFFFFFFFFFFFFFFFFFFFFFFFFFFFFFFFFFFFFFFFFFFFF  
 @A00155:342:HHGFNDSXY:1:2522:9408:14904 2:N:0:GAACCTAG+TCCGCATA  
 ACATCTCCTTTGGAAGTACTAGGAGACCCCTCCGGTCTTGTCCAACCTCTGTTTCGGCAGAGGATACCGTG  
 CTCCACAGCTGTAAGGCTGTGGGCCCCGAGAGAAGTCGCTCTCTCTCGCCCTCCACATCCCTCTCGG  
 +  
 FFFFFFFFFFFFFFFFFFFFFFFFFFFFFFFFFFFFFFFFFFFFFFFFFFFFFFFFFFFFFFFFFFFFFFFFFF  
 FFFFFFFFFFFFFFFFFFFFFFFFFFFFFFFFFFFFFFFFFFFFFFFFFFFFFFFFFFFFFFFFFFFFFFFFFF  
 @A00155:342:HHGFNDSXY:1:2522:7636:23171 2:N:0:GAACCTAG+TCCGCATA  
 GTACATCTCCTTTGGAAGTACTAGGAGACCCCTCCGGTCTTGTCCAACCTCTGTTTCGGCAGAGGATACCG  
 TGCTCCACAGCTGTAAGGCTGTGGGCCCCGAGAGAAGTCGCTCTCTCTCGCCCTCCACATCCCTCTCGG  
 +  
 FFFFFFFFFFFFFFFFFFFFFFFFFFFFFFFFFFFFFFFFFFFFFFFFFFFFFFFFFFFFFFFFFFFFFFFFFF  
 FFFFFFFFFFFFFFFFFFFFFFFFFFFFFFFFFFFFFFFFFFFFFFFFFFFFFFFFFFFFFFFFFFFFFFFFFF:FFFFFFFFFFFFFFFF  
 @A00155:342:HHGFNDSXY:1:2522:23710:24142 2:N:0:GAACCTAG+TCCGCATA  
 AGGACTCGTCAGGTAGCCTACTAGACTACGACTTACACGGTAGGTCGTGAACAAGCCCGAGTACATC  
 TCCTTTGGAAGTACTAGGAGACCCCTCCGGTCTTGTCCAACCTCTGTTTCGGCAGAGGATACCGTGCTCCA  
 +  
 FFFFFFFFFFFFFFFFFFFFFFFFFFFFFFFFFFFFFFFFFFFFFFFFFFFFFFFFFFFFFFFFFFFFFFFFFF  
 FFFFFFFFFF,FFFFFFFFFFFFFFFFFFFFFFFFFFFFFFFFFFFFFFFFFFFFFFFFFFFFFFFFFFFFFFFF  
 @A00155:342:HHGFNDSXY:1:2522:32741:24314 2:N:0:GAACCTAG+TCCGCATA  
 GTGAACAAGCCCGGAGTACATCTCCTTTGGAAGTACTAGGAGACCCCTCCGGTCTTGTCCAACCTCTGTTT  
 CGGCAGAGGATACCGTGCTCCACAGCTGTAAGGCTGTGGGCCCCGAGAGAAGTCGCTCTCTCTCGCCCT  
 +  
 FFFFFFFFFFFFFFFFFFFFFFFFFFFFFFFFFFFFFFFFFFFFFFFFFFFFFFFFFFFFFFFFFFFFFFFFFF  
 FFF:FF:FFFFFFFFFFFFFFFFFFFFFFFFFFFFFFFFFFFFFFFFFFFFFFFFFFFFFFFFFFFFFFFF  
 @A00155:342:HHGFNDSXY:1:2522:16613:33771 2:N:0:GAACCTAG+TCCGCATA  
 CACGGTAGGTCGTGAACAAGCCCGGAGTACATCTCCTTTGGAAGTACTAGGAGACCCCTCCGGTCTTGTCC  
 AACCTCTGTTTCGGCAGAGGATACCGTGCTCCACAGCTGTAAGGCTGTGGGCCCCGAGAGAAGTCGCTC  
 +  
 FFFFFFFFFF:FFFFFFFFFFFFFFFFFFFFFFFFFFFFFFFFFFFFFFFFFFFFFFFFFFFFFFFFFFFFFFFF  
 FFFFFFFFFFFFFFFFFFFFFFFFFFFFFFFFFFFFFFFFFFFFFFFFFFFFFFFFFFFFFFFFFFFFFFFFFF  
 @A00155:342:HHGFNDSXY:1:2522:18973:35321 2:N:0:GAACCTAG+TCCGCATA  
 CAGCTGTAAGGCTGTGGGCCCCGAGAGAAGTCGCTCTCTCTCGCCCTCCACATCCCTCTCGGCATTGAG  
 ATGACCATAGGCCAGAGGTGAGTTCTTAAGTGGACACAGCTGATCTAAGGCGGTGTGGCGGGGCATGG  
 +  
 FFFFFFFFFFFFFFFFFFFFFFFFFFFFFFFFFFFFFFFFFFFFFFFFFFFFFFFFFFFFFFFFFFFFFFFFFF  
 FFFFFFFFFF,FFFFFFFFFFFFFFFFFFFFFFFFFFFFFFFFFFFFFFFFFFFFFFFFFFFFFFFFFFFFFFFF  
 @A00155:342:HHGFNDSXY:1:2522:10628:36276 2:N:0:GAACCTAG+TCCGCATA  
 AGAGAGAGCGACTTCTCTCGGGCCCCACAGCCTTACAGCTGTGGAGCACGGTATCCTCTGCCGAAACAG

AGGTTGGACAAGACCGGAGGGGTCTCCTGGTTCCTCAAGGAGATGTACTCCGGGCTTGTTACGACCTA  
+  
FFFFFFFFFFFFFFFFFFFFFFFFFFFFFFFFFFFFFFFFFFFFFFFFFFFFFFFFFFFFFFFFFFFFF:FFFFFFFFFFFFFFFFFFFF  
FFFFFFFFFFFFF::FFFFFFFFFFFFFFFFFFFFFFFFFFFFFFFFFFFFFFFFFFFFFFFFFFFFFFFFFFFFF  
@A00155:342:HHGFNDSXY:1:2523:19117:4726 2:N:0:GAACCTAG+TCCGCATA  
CGTCCTAAAAAGGACTCGTCAGGTAGCCTACTAGACTACGACTTACACGGTAGGTCTGTAACAAGCCC  
GGAGTACATCTCCTTTGGAACCAGGAGACCCCTCCGGTCTTGTCCAACCTCTGTTTCGGCAGAGGAT  
+  
FFFFFFFFFFFFFFFFFFFFFFFFFFFFFFFFFFFFFFFFFFFFFFFFFFFFFFFFFFFFFFFFFFFFF  
FFFFFFFFFFFFFFFFFFFFFFFFFFFFFFFFFFFFFFFFFFFFFFFFFFFFFFFFFFFFFFFFFFFFF  
@A00155:342:HHGFNDSXY:1:2523:30553:19304 2:N:0:GAACCTAG+TCCGCATA  
TCCTTTGGAAGTACTAGGAGACCCCTCCGGTCTTGTCCAACCTCTGTTTCGGCAGAGGATACCGTGCTCCA  
CAGCTGTAAGGCTGTGGGCCCGAGAGAAGTCGCTCTCTCTCGCCCTCTACATCCCTCTCGGCATTGAG  
+  
FFFF:FFFF:FFFFFFFFFFFFFFFFFFFFFFFFFFFFFFFFFFFFFFFFFFFFFFFFFFFFFFFFFFFFF  
FFFFFFFFFFFFFFFFFFFFFFFFFFFFFFFFFFFFFFFFFFFFFFFFFFFFFFFFFFFFFFFFFFFFF  
@A00155:342:HHGFNDSXY:1:2523:31186:19648 2:N:0:GAACCTAG+TCCGCATA  
TCCTTTGGAAGTACTAGGAGACCCCTCCGGTCTTGTCCAACCTCTGTTTCGGCAGAGGATACCGTGCTCCA  
CAGCTGTAAGGCTGTGGGCCCGAGAGAAGTCGCTCTCTCTCGCCCTCTACATCCCTCTCGGCATTGAG  
+  
FFFFFFFFFFF:FFFFFFFFFFFFFFFFFFFFFFFFFFFFFFFFFFFFFFFFFFFFFFFFFFFFFFFFFFFFF  
FFFF:FFFFFFFFFFFFFFFFFFFFFFFFFFFFFFFFFFFFFFFFFFFFFFFFFFFFFFFFFFFFFFFFFFFFF  
@A00155:342:HHGFNDSXY:1:2523:28031:31093 2:N:0:GAACCTAG+TCCGCATA  
TCCTTTGGAAGTACTAGGAGACCCCTCCGGTCTTGTCCAACCTCTGTTTCGGCAGAGGATACCGTGCTCCA  
CAGCTGTAAGGCTGTGGGCCCGAGAGAAGTCGCTCTCTCTCGCCCTCTACATCCCTCTCGGCATTGAG  
+  
FFFFFFFFFFFFFFF:FFFFFFFFFFFFFFFFFFFFFFFFFFFFFFFFFFFFFFFFFFFFFFFFFFFFFFFFFFFFF  
FFFFFFFFFFFFFFF:F:FFFFFFFFFFFFFFFFFFFFFFFFFFFFFFFFFFFFFFFFFFFFFFFFFFFFFFFFFFFFF  
@A00155:342:HHGFNDSXY:1:2523:23493:36417 2:N:0:GAACCTAG+TCCGCATA  
TCTTCGAGTTGTGTAAGTTTCGTCTAAAAAGGACTCGTCAGGTAGCCTACTAGACTACGACTTACAC  
GGTAGGTCGTGAACAAGCCCGGAGTACATCTCCTTTGGAAGTACTAGGAGACCCCTCCGGTCTTGTCCAAC  
+  
FFFFFFFFFFFF:FFFFFFFFFFFFFFFFFFFFFFFFFFFFFFFFFFFFFFFFFFFFFFFFFFFFFFFFFFFFF  
FFFFFFFFFFFFFFFFFFFFFFFFFFFFFFFFFFFFFFFFFFFFFFFFFFFFFFFFFFFFFFFFFFFFF  
@A00155:342:HHGFNDSXY:1:2524:1344:32784 2:N:0:GAACCTAG+TCCGCATA  
AACTAGGAGACCCCTCCGGTCTTGTCCAACCTCTGTTTCGGCAGAGGATACCGTGCTCCACAGCTGTA  
AGGCTGTGGGCCCGAGAGAAGTCGCTCTCTCTCGCCCTCCACATCCATCTCGGCATT  
+  
,FFF:FF:F,FFF::,,FFF,FFFF:FFFFFFFF:FFFFFFF:,,:F,F:FFF,FFFF,F,:F,FFFFFFFF  
,FFFFFFFFFFFF,FFF,F:F,,FFFF,FFF,F,F,F,FFFF,,FFFFF,:,F:FFF,FF  
@A00155:342:HHGFNDSXY:1:2525:5339:1344 2:N:0:GAACCTAG+TCCGCATA  
CCGCCTTAGATCAGCTGTGTCCACTTAAGGACTCACCTCTGGCCTATGGTCATCTCAATGCCGAGAGG  
GATGTAGAGGGCGAGAGAGAGCGACTTCTCTCGGGCCCCACAGCCTTACAGCTGTGGAGCACGGTATCC  
+  
:F:FFFFFFF:FFFFFFFFFFFFFFF:F:FFFFF,FFFFFFFFFFFFF:FFFFFFF,FFFFFFFFFFFFFFF:::F,FFF:  
FF:FF:F,FFF:FFFFFFFFFFFFFFFFFFFFFFFFFFFFF,F,FF:F:F:FFFFFFFFF:FF:FFFFFFFFF:FFF  
@A00155:342:HHGFNDSXY:1:2525:18719:11303 2:N:0:GAACCTAG+TCCGCATA  
TAGACTACGACTTACACGGTAGGTCTGTAACAAGCCCGGAGTACATCTCCTTTGGAAGTACTAGGAGACCC  
CTCCGGTCTTGTCCAACCTCTGTTTCGGCAGAGGATACCGTGCTCCACAGCTGTAAGGCTGTGGGCC  
+  
FFFFFFFFFFFFFFFFFFFFFFFFFFFFFFFFFFFFFFFFFFFFFFFFFFFFFFFFFFFFFFFFFFFFF  
FFFFFFFFFFFF,FFFFFFFFFFFFFFFFFFFFFFFFFFFFFFFFFFFFFFFFFFFFFFFFFFFFFFFFFFFFF:FFFF  
@A00155:342:HHGFNDSXY:1:2526:25030:10582 2:N:0:GAACCTAG+TCCGCATA  
TAGGAGACCCCTCCGGTCTTGTCCAACCTCTGTTTCGGCAGAGGATACCGTGCTCCACAGCTGTAAGG



CTGTGGGCCCCGAGAGAAGTCGCTCTCTCTCGCCCTCCACATCCCTCTCGGCATTGAGATGACCATAGG  
+  
FFFFFFFF:FFFFFFFFFFFFFFFFFFFFFFFFFFFFFFFFFFFFFFFF:FF:FFFFFF:FFF:FFFFFFFFFFFFFFFF  
F:FFFFFFFFFFFFFFFF:FFFFFFFFFFFFFF::FFFFFFFFFFFF,FFFFFFFFFFFFFFFFFFFFFFFFFFFF  
@A00155:342:HHGFNDSXY:1:2526:32344:10911 2:N:0:GAACCTAG+TCCGCATA  
TAGCCTACTAGACTACGACTTACACGGTAGGTCGTGAACAAGCCCGGAGTACATCTCCTTTGGAAC  
GGAGACCCCTCCGGTCTTGTCCAACCTCTGTTTCAGCAGAGGATACCGTGCTCCACAGCTGTAAGGCT  
+  
FFFFFFFFFFFFFFFFFFFFFFFFFFFFFFFFFFFFFFFFFFFFFFFFFFFFFFFFFFFFFFFF:FFFFFFFF  
FFFFFF:FFFFFFFFFFFFFFFFFFFFFFFFFFFFFFFFFFFFFFFF:FFFFFFFFFFFFFFFF:FF,:FFF:  
@A00155:342:HHGFNDSXY:1:2526:3459:28087 2:N:0:GAACCTAG+TCCGCATA  
AGTACATCTCCTTTGGAACCAGGAGACCCCTCCGGTCTTGTCCAACCTCTGTTTCGGCAGAGGATACC  
GTGCTCCACAGCTGTAAGGCTGTGGGCCCCGAGAGAAGTCGCTCTCTCTCGCCCTCCACATCCCTCTCG  
+  
FFFFFFFFFFFFFFFFFFFFFFFFFFFFFFFFFFFFFFFFFFFFFFFFFFFFFFFFFFFFFFFF:FFFFFFFF  
FFFFFFFFFFFFFFFFFFFFFFFFFFFFFFFFFFFFFFFFFFFFFFFFFFFFFFFFFFFFFFFF:FFFFFFFF  
@A00155:342:HHGFNDSXY:1:2527:9281:15718 2:N:0:GAACCTAG+TCCGCATA  
GGACTCGTCAGGTAGCCTACTAGACTACGACTTACACGGTAGGTCGTGAACAAGCCCGGAGTACATCT  
CCTTTGGAACCAGGAGACCCCTCCGGTCTTGTCCAACCTCTGTTTCGGCAGAGGATACCGTGCTCCAC  
+  
FFFFFFFFFFFFFFFFFFFFFFFFFFFFFFFFFFFFFFFFFFFFFFFFFFFFFFFFFFFFFFFF:FFFFFFFF  
FFFFFFFFFFFFFFFFFFFFFFFFFFFFFFFFFFFFFFFFFFFFFFFFFFFFFFFFFFFFFFFF:FFFFFFFF  
@A00155:342:HHGFNDSXY:1:2527:10755:17331 2:N:0:GAACCTAG+TCCGCATA  
GGACTCGTCAGGTAGCCTACTAGACTACGACTTACACGGTAGGTCGTGAACAAGCCCGGAGTACATCT  
CCTTTGGAAGTAGGAGACCCCTCCGGTCTTGTCCAACCTCTGTTTCGGCAGAGGATACCGTGCTCCAC  
+  
FFFFFFFFFFFFFFFFFFFFFFFFFFFFFFFFFFFFFFFFFFFFFFFFFFFFFFFFFFFFFFFF:FFFFFFFF  
FFFFFFFFFFFFFFFFFFFFFFFFFFFFFFFFFFFFFFFFFFFFFFFFFFFFFFFFFFFFFFFF:FFFFFFFF  
@A00155:342:HHGFNDSXY:1:2527:15248:18818 2:N:0:GAACCTAG+TCCGCATA  
TCTTGTCCAACCTCTGTTTCGGCAGAGGATACCGTGCTCCACAGCTGTAAGGCTGTGGGCCCCGAGAGA  
AGTCGCTCTCTCTCGCCCTCTACATCCCTCTCGGCATTGAGATGACCATAGGCCAGAGGTGAGTCCTT  
+  
FF,FFFFFFFFFFFFFFFFFFFFFFFFFFFFFFFFFFFFFFFFFFFFFFFFFFFFFFFFFFFFFFFF:FFFFFFFF  
FFFFFFFFFFFFFFFFFFFFFFFFFFFFFFFFFFFFFFFFFFFFFFFFFFFFFFFFFFFFFFFF:FFFFFFFF  
@A00155:342:HHGFNDSXY:1:2527:8043:27571 2:N:0:GAACCTAG+TCCGCATA  
TAGACTACGACTTACACGGTAGGTCGTGAACAAGCCCGGAGTACATCTCCTTTGGAAGTAGGAGACCC  
CTCCGGTCTTGTCCAACCTCTGTTTCGGCAGAGGATACCGTGCTCCACAGCTGTAAGGCTGTGGGCCC  
+  
FFFFFFFFFFFFFFFFFFFFFFFFFFFFFFFFFFFFFFFFFFFFFFFFFFFFFFFFFFFFFFFF:FFFFFFFF:FFFFFFFF  
FFFFFF:FFFFFFFFFFFFFFFFFFFFFFFFFFFFFFFFFFFFFFFF:FFFFFFFFFFFFFFFFFFFFFFFF:FF  
@A00155:342:HHGFNDSXY:1:2527:3441:30530 2:N:0:GAACCTAG+TCCGCATA  
AGTACATCTCCTTTGGAAGTAGGAGACCCCTCCGGTCTTGTCCAACCTCTGTTTCGGCAGAGGATACC  
GTGCTCCACAGCTGTAAGGCTGTGGGCCCCGAGAGAAGTCGCTCTCTCTAGCCCTCCACATCCCTCTCG  
+  
FFFFFFFFFFFFFFFFFFFFFFFFFFFFFFFFFFFFFFFFFFFFFFFFFFFFFFFFFFFFFFFF:FFFFFFFF  
FFFFFFFFFFFFFFFFFFFFFFFFFFFFFFFFFFFFFFFFFFFFFFFFFFFFFFFFFFFFFFFF:FFFFFFFF  
@A00155:342:HHGFNDSXY:1:2527:2211:30655 2:N:0:GAACCTAG+TCCGCATA  
AGTACATCTCCTTTGGAAGTAGGAGACCCCTCCGGTCTTGTCCAACCTCTGTTTCGGCAGAGGATACC  
GTGCTCCACAGCTGTAAGGCTGTGGGCCCCGAGAGAAGTCGCTCTCTCTAGCCCTCCACATCCCTCTCG  
+  
FFFF:FFFFFFFFFFFFFFFFFFFFFFFF:FFFFFFFFFFFF,FFFFFFFFFFFFFFFFFFFFFFFF:F,FFFFFF  
F:FFFFF:FFFFFFFFFFFF:FFFFFFFF:FFFFFFFFFFFFFFFFFFFFFFFFFFFFFFFF:FFFFFFFF  
@A00155:342:HHGFNDSXY:1:2529:18349:20243 2:N:0:GAACCTAG+TCCGCATA  
AAGCCCGGAGTACATCTCCTTTGGAACCAGGAGACCCCTCCGGTCTTGTCCAACCTCTGTTTCGGCAG

AGGATACCGTGCTCCACAGCTGTAAGGCTGTGGGCCCGAGAGAAGTCGCTCTCTCTCGCCCTCCACAT  
+  
FFFFFFFFFFFFFFFF,FFFFF,:FFFFFFFF,FFFFFFFFFFFF:FFFF::FFFFFFFFFFFFFFFF,FFFFF,F  
FFFF:FFFFFFFF:FFF:FFFFFFFFFFFF,FFFFFFFF:FFFFFFFFFFFFFFFFFFFFFFFFFFFFF  
@A00155:342:HHGFNDSXY:1:2530:14434:3724 2:N:0:GAACCTAG+TCCGCATA  
CGGACTCATCAGGGAGCCTACTAGACTCCGACCGTCATGGGGTTCAAACCCATGCCCCGCTACACCG  
CCTTAGATCAGCTGTGTCCACTTAAGGACTCACCTCTGGCCTATGGTCATCTCAATGCCGAGAGGGAT  
+  
FFFFFFFFFFFFFFFFFFFFFFFF:FFFFFFFFFFFFFFFFFFFFFFFFFFFFFFFFFFFFFFFFFFFFF  
FFFFFFFFFFFFFFFFFFFFFFFFFFFFFFFFFFFFFFFFFFFFFFFFFFFFFFFFFFFFFFFFFFFFF:FFFFFFFFF  
@A00155:342:HHGFNDSXY:1:2530:26476:10019 2:N:0:GAACCTAG+TCCGCATA  
GTGAACAAGCCCGAGTACATCTCCTTTGGAAGTACGAGACCCCTCCGGTCTTGTCCAACCTCTGTTT  
CGGCAGAGGATACCGTGCTCCACAGCTGTAAGGCTGTGGGCCCGAGAGAAGTCGCTCTCTCTCGCCCT  
+  
FFFFFFFFFFFFFFFFFFFFFFFFFFFFFFFF:FFFFFFFFFFFFFFFFFFFFFFFFFFFFFFFFFFFFFFFFF  
FFFFFFFFF:FFFFFFFFF:FFFFFFFFFFFFFFFFFFFFFFFFFFFFFFFFFFFFFFFFFFFFFFFFFFFFF  
@A00155:342:HHGFNDSXY:1:2530:22896:14873 2:N:0:GAACCTAG+TCCGCATA  
AAAGGACTCGTCAGGTAGCCTACTAGACTACGACTTACACGGTAGGTCGTGAACAAGCCCGAGTACA  
TCTCCTTTGGAAGTACGAGACCCCTCCGGTCTTGTCCAACCTCTGTTTCGGCAGAGAATACCGTGCTC  
+  
FFFFFFFFFFFFFFFFFFFFFFFFFFFFFFFFFFFFFFFFFFFFFFFFFFFFFFFFFFFFFFFFFFFFFFFFF  
FFFFFFFFF:FFFFFFFFF:FFFFFFFFFFFFFFFFFFFFFFFFFFFFFFFFFFFFFFFFFFFFFFFFFFFFF,FFFFFFFFF  
@A00155:342:HHGFNDSXY:1:2530:14769:26600 2:N:0:GAACCTAG+TCCGCATA  
AACTAGGAGACCCCTCCGGTCTTGTCCAACCTCTGTTTCGGCAGAGGATACCGTGCTCCACAGCTGTA  
AGGCTGTGGGCCCGAGAGAAGTCGCTCTCTCTCGCCCTCTACATCCCTCTCGGCATTGAGATGACCAT  
+  
FFFFFFFFFFFFFFFFFFFFFFFFFFFFFFFFFFFFFFFFFFFFFFFFFFFFFFFFFFFFFFFFFFFFFFFFF  
FFFFFFFFFFFFFFFFFFFFFFFFFFFFFFFFFFFFFFFFFFFFFFFFFFFFFFFFFFFFFFFFFFFFF,FFFFFFFFF  
@A00155:342:HHGFNDSXY:1:2530:2410:32033 2:N:0:GAACCTAG+TCCGCATA  
AGTTTCGTCCTAAAAAGGACTCGTCAGGTAGCCTACTAGACTACGACTTACACGGTAGGTCGTGAACA  
AGCCCGGAGTACATCTCCTTTGGAAGTACGAGACCCCTCCGGTCTTGTCCAACCTCTGTTTCGGCAG  
+  
FFFFFFF:FFFFFFFFFFFFFFFFFFFFFFFFFFFFFFFFFFFFFFFF:FFF,FFFFFFFFFFFFFFFFFFFFF:FFF  
FFFFFFFFF:FFFFFFFFFFFFFFFFFFFFFFFFFFFFFFFFFFFFFFFF:FFFFFFFFFFFFFFFFFFFFFFFFF  
@A00155:342:HHGFNDSXY:1:2531:27010:4711 2:N:0:GAACCTAG+TCCGCATA  
GACCCCTCCGGTCTTGTCCAACCTCTGTTTCGGCAGAGGATACCGTGCTCCACAGCTGTAAGGCTGTG  
GGCCCGAGAGAAGTCGCTCTCTCTCGCCCTCCACATCCCTCTCGGCATTGAGATGACC  
+  
,FFFFFFFF,FFFFFF:FFFFFF,FFFFFFFFFFFF,FFFFFFFFFFFF,FFFF:FFFFFFFFFFFF  
FF::FFFFFFFFFFFFFFFFFFFF:FF:FFFFFFFFFFFF:FFFFFF:FFF::FFFFFF,F  
@A00155:342:HHGFNDSXY:1:2531:17815:15843 2:N:0:GAACCTAG+TCCGCATA  
GAGACCCCTCCGGTCTTGTCCAACCTCTGTTTCGGCAGAGGATACCGTGCTCCACAGCTGTAAGGCTG  
TGGGCCCGAGAGAAGTCGCTCTCTCTCGCCCTCCACATCCCTCTCGGCAGTGAGATGACCATAGGCCA  
+  
FFFFFFFFFFFFFFFFFFFFFFFFFFFFFFFFFFFFFFFF:FFFFFFFFFFFFFFFFFFFFFFFFFFFFFFFFF  
FFFFFFFFFFFFFFFFFFFFFFFFFFFFFFFFFFFFFFFFFFFFFFFFFFFFFFFFFFFFFFFFFFFFF,FFFFFFFFF,FFFFFFF  
@A00155:342:HHGFNDSXY:1:2532:8657:1297 2:N:0:GAACCTAG+TCCGCATA  
GCCCCGAGTACATCTCCTTTGGAAGTACGAGACCCCTCCGGTCTTGTCCAACCTCTGTTTCGGCAGAG  
GATACCGTGCTCCACAGCTGTAAGGCTGTGGGCCCGAGAGAAGTCGCTCTCTCTCGCCCTCCACATCC  
+  
FFFFFFFFFFFFFFFFFFFFFFFFFFFFFFFFFFFFFFFFFFFFFFFFFFFFFFFFFFFFFFFFFFFFFFFFF  
FFFFFFFFFFFFFFFFFFFFFFFFFFFFFFFFFFFFFFFFFFFFFFFFFFFFFFFFFFFFFFFFFFFFFFFFF  
@A00155:342:HHGFNDSXY:1:2532:3079:15468 2:N:0:GAACCTAG+TCCGCATA  
ACACGGTAGGTCGTGAACAAGCCCGAGTACATCTCCTTTGGAAGTACGAGACCCCTCCGGTCTTGTG

CAACCTCTGTTTCGGCAGAGGATACCGTGCTCCACAGCTGTAAGGCTGTGGGCCCGAGAGAAGTCGCT  
+  
FFFFFFFFFFFFFFFFFFFFFFFFFFFFFFFFFFFFFFFFFFFFFFFFFFFFFFFFFFFFFFFFFFFFFFFF  
FFFFFFFFFFFFFFFF:FFFFFFFFFFFFFFFFFFFFFFFFFFFFFFFFFFFFFFFFFFFFFFFFFFFFFFFF  
@A00155:342:HHGFNDSXY:1:2532:30508:19664 2:N:0:GAACCTAG+TCCGCATA  
GTAGCCTACTAGACTACGACTTACACGGTAGGTCGTGAACAAGCCCGAGTACATCTCCTTTGGA  
AGGAGACCCCTCCGGTCTTGTCCAACCTCTGTTTCGGCAGAGGATACCGTGCTCCACAGCTGTAAGGC  
+  
FFFFFFFFFFFFFFFFFFFFFFFFFFFFFFFFFFFFFFFFFFFFFFFFFFFFFFFFFFFFFFFFFFFFFFFF  
FFFFFFFFFFFFFFFFFFFFFFFFFFFFFFFFFFFFFFFFFFFFFFFFFFFFFFFFFFFFFFFFFFFFFFFF  
@A00155:342:HHGFNDSXY:1:2532:7591:22748 2:N:0:GAACCTAG+TCCGCATA  
ATCTAAGGCGGTGTGGCAGGGCATGGGTTTGAACCCCATGACGGTCGGAGTCTAGTAGGCTCCCTGA  
TGAGTCCGTTCCAAGGACGAAACCGTCGTTACTCTTCGAGTTGTGTAAGTTTCGTCCTAAAAAGGACT  
+  
:FFFFFFFFFFFFFFFFFFFFFFFFFFFFFFFFFFFFFFFFFFFFFFFFFFFFFFFFFFFFFFFFFFFFFFFF  
FFFFFFFFFFFFFFFFFFFFFFFF:FF:FFFFFFFFFFFFFFFFFFFFFFFFFFFFFFFFFFFFFFFF,FFFFFFFF:F:,FFFF  
@A00155:342:HHGFNDSXY:1:2532:6696:23422 2:N:0:GAACCTAG+TCCGCATA  
ATCTAAGGCGGTGTGGCGGGGCATGGGTTTGAACCCCATGACGGTCGGAGTCTAGTAGGCTCCCTGA  
TGAGTCCGTTCCAAGGACGAAACCGTCGTTACTCTTCGAGTTGTGTAAGTTTCGTCCTAAAAAGGACT  
+  
FFFFFFFFFFFFFFFFFFFFFFFFFFFFFFFFFFFFFFFFFFFFFFFFFFFFFFFFFFFFFFFFFFFFFFFF:FFFFFFF  
FFFFFFFFFFFFFFFFFFFFFFFFFFFFFFFFFFFFFFFFFFFFFFFFFFFFFFFFFFFFFFFFFFFFFFFF:FFFF:FFFF  
@A00155:342:HHGFNDSXY:1:2532:10285:24439 2:N:0:GAACCTAG+TCCGCATA  
TACGACTTACACGGTAGGTCGTGAACAAGCCCGAGTACATCTCCTTTGGAAGTACGAGACCCCTCCG  
GTCTTGTCCAACCTCTGTTTCGGCAGAGGATACCGTGCTCCACAGCTGTAAGGCTGTGGGCCCG  
+  
FFFFFFFFFFFFFFFFFFFFFFFFFFFFFFFFFFFFFFFFFFFFFFFFFFFFFFFFFFFFFFFFFFFFFFFF  
FFFFFFFFFFFFFFFFFFFFFFFFFFFFFFFFFFFFFFFFFFFFFFFFFFFFFFFFFFFFFFFFFFFFFFFF  
@A00155:342:HHGFNDSXY:1:2533:24840:8563 2:N:0:GAACCTAG+TCCGCATA  
GGATGTGGAGGGCGAGAGAGAGAGACTTCTCTCGGGCCACAGCCTTACAGCTGTGGAGCACGGTATC  
CTCTGCCGAAACAGAGGTTGGACAAGACCGGAGGGGTCTCCTAGTTCCAAAGGAG  
+  
FFF:FFFFFFFFFFFFFFFFFFFFFFFFFFFFFFFFFFFFFFFFFFFFFFFFFFFFFFFFFFFFFFFFFFFF  
FFFFFFFFFFFFFFFFFFFFFFFFFFFFFFFFFFFFFFFFFFFFFFFFFFFFFFFFFFFFFFFFFFFFFFFF  
@A00155:342:HHGFNDSXY:1:2533:14579:21042 2:N:0:GAACCTAG+TCCGCATA  
GACGAACTTACACAACCTCAAAGAGTAACGACGGTTTCGTCCTTGAACGGACTCATCAGGGAGCCTA  
CTAGACTCCGACCGTCATGGGGGTTCAAACCCATGCCCCGCCACACCGCCTTAGATCAGCTGTGTCCA  
+  
FFFFFFFFFFFFFFFFFFFFFFFFFFFFFFFFFFFFFFFFFFFFFFFFFFFFFFFFFFFFFFFFFFFFFFFF  
FFFFFFFFFFFFFFFFFFFFFFFFFFFFFFFFFFFFFFFFFFFFFFFFFFFFFFFFFFFFFFFFFFFFFFFF:  
@A00155:342:HHGFNDSXY:1:2534:22173:1846 2:N:0:GAACCTAG+TCCGCATA  
GACGAACTTACACAACCTCGAAGAGTAACGACGGTTTCGTCCTTGAACGGACTCATCAGGGAGCCTA  
CTAGACTCCGACCGTCATGGGGGTTCAAACCCATGCCCCGCTACACCGCCTTAGATCAGCTGTGTCCA  
+  
FFFFFFFFFFFFFFFFFFFFFFFFFFFFFFFFFFFFFFFFFFFFFFFFFFFFFFFFFFFFFFFFFFFFFFFF  
FFFFFFFFFFFFFFFFFFFFFFFFFFFFFFFFFFFFFFFFFFFFFFFFFFFFFFFFFFFFFFFFFFFFFFFF  
@A00155:342:HHGFNDSXY:1:2534:19126:9846 2:N:0:GAACCTAG+TCCGCATA  
GACGAACTTACACAACCTCGAAGAGTAACGACGGTTTCGTCCTTGAACGGACTCATCAGGGAGCCTA  
CTAGACTCCGACCGTCATGGGGGTTCAAACCCATGCCCCGCTACACCGCCTTAGATCAGCTGTGTCCA  
+  
FFFFFFFFFFFFFFFFFFFFFFFFFFFFFFFFFFFFFFFFFFFFFFFFFFFFFFFFFFFFFFFFFFFFFFFF  
FFFFFFFFFFFFFFFFFFFFFFFFFFFFFFFFFFFFFFFFFFFFFFFFFFFFFFFFFFFFFFFFFFFFFFFF  
@A00155:342:HHGFNDSXY:1:2534:15917:10113 2:N:0:GAACCTAG+TCCGCATA  
CATGGGGGTTCAAACCCATGCCCCGCCACACCGCCTTAGATCAGCTGTGTCCACTTAAGGACTCACCT

CTGGCCTATGGTCATCTCAATGCCGAGAGGGAGGTGGAGGGCGAGAGAGAGCGACTTCTCTCGGG  
+  
F::FFFFFFFFFFFFFFFFFFFFFFFFFFFFFFFFFFFFFFFFFFFFFFFFFFFFFFFFFFFFFFFFFFFFF  
FFF:FFFFFFFFFFFFFFFFFFFFFFFF:FFFF,F,FFFFFFFFFFFFFFFFFFFFFFFFFFFFFFFFFFFF  
@A00155:342:HHGFNDSXY:1:2534:6153:12054 2:N:0:GAACCTAG+TCCGCATA  
CTTGTCCAACCTCTGTTTCGGCAGAGGATACCGTGCTCCACAGCTGTAAGGCTGTGGGCCCGAGAGAA  
GTCGCTCTCTTCGCCCTCCACATCCCTCTCGGCATTGAGATGACCATAGGCCAGAGGTGAG  
+  
FFFFFFFFFFFFFFFFFFFFFFFFFFFFFFFFFFFFFFFFFFFFFFFFFFFFFFFFFFFFFFFFFFFFFFFFF  
FFFFFFFFFFFFFFFFFFFFFFFFFFFFFFFFFFFFFFFF:FFFFFFFFFFFFFFFF:FFFFFFFFF  
@A00155:342:HHGFNDSXY:1:2534:5746:12446 2:N:0:GAACCTAG+TCCGCATA  
CTTGTCCAACCTCTGTTTCGGCAGAGGATACCGTGCTCCACAGCTGTAAGGCTGTGGGCCCGAGAGAA  
GTCGCTCTCTTCGCCCTCCACATCCCTCTCGGCATTGAGATGACCATAGGCCAGAGGTGAG  
+  
FFFFFFFFFFFFFFFFFFFFFFFFFFFFFFFFFFFFFFFFFFFFFFFFFFFFFFFFFFFFFFFFFFFFFFFFF  
FFFFFFFFFFFFFFFFFFFFFFFFFFFFFFFFFFFFFFFF:FFFFFFFFFFFFFFFF:FFFFFFFFFFFFF  
@A00155:342:HHGFNDSXY:1:2535:20003:7795 2:N:0:GAACCTAG+TCCGCATA  
TCGTGAACAAGCCCGAGTACATCTCCTTTGGAAGTACGAGACCCCTCCGGTCTTGTCCAACCTCTGT  
TTCGGCAGAGGATACCGTGCTCCACAGCTGTAAGGCTGTGGGCCCGAGAGAAGTCGCTCTCTCTCGCC  
+  
FFFFFFFFFFFFFFFFFFFFFFFFFFFFFFFFFFFFFFFFFFFFFFFFFFFFFFFFFFFFFFFFFFFFFFFFF  
FFFFFFFFFFFFFFFFFFFFFFFFFFFFFFFFFFFFFFFFFFFFFFFFFFFFFFFFFFFFFFFFFFFFFFFFF:FFFFFFFFFFFFFFFFF  
@A00155:342:HHGFNDSXY:1:2535:12915:17910 2:N:0:GAACCTAG+TCCGCATA  
CGGCAGAGGATACCGTGCTCCACAGCTGTAAGGCTGTGGGCCCGAGAGAAGTCGCTCTCTCTCGCCCT  
CCACATCCCTCTCGGCATTGAGATGACCATAGGCCAGAGGTGAGTCCTTAAGTGGACACAGCTGATCT  
+  
FFFFFFFFFFFF:FFFFFFFFFFFFFFFFFFFFFFFFFFFFFFFFFFFFFFFFFFFFFFFFFFFFFFFFFFFFF  
FFFFFFFFFFFFFFFFFFFFFFFFFFFFFFFFFFFFFFFF,FF:FFFFFFFFFFFFFFFFFFFFFFFF,FFFFFFFFFFFFFFFFFFFFF  
@A00155:342:HHGFNDSXY:1:2535:29785:18098 2:N:0:GAACCTAG+TCCGCATA  
GAGACCCCTCCGGTCTTGTCCAACCTCTGTTTCGGCAGAGGATACCGTGCTCCACAGCTGTAAGGCTG  
TGGGCCCGAGAGAAGTCGCTCTCTCTCGCCCTCCACATCCCTCTCGGCATTGAGATGACCATAGGCC  
+  
FFFFFFFFFFFFFFFFFFFFFFFFFFFFFFFFFFFFFFFFFFFFFFFFFFFFFFFFFFFFFFFFFFFFFFFFF  
FFFFFFFFFFFFFFFF:FFFFFFFFFFFF:FF:F:FFFFFFFFFFFFFFFFFFFFFFFFFFFFFFFFFFFFF  
@A00155:342:HHGFNDSXY:1:2535:31051:18411 2:N:0:GAACCTAG+TCCGCATA  
GTGAACAAGCCCGAGTACATCTCCTTTGGAACCAGGAGACCCCTCCGGTCTTGTCCAACCTCTGTTT  
CGGCAGAGGATACCGTGCTCCACAGCTGTAAGGCTGTGGGCCCGAGAGAAGTCGCTCTCTCTCGCCCT  
+  
FFFFFFFFFFFFFFFFFFFFFFFFFFFFFFFFFFFFFFFFFFFFFFFFFFFFFFFFFFFFFFFFFFFFFFFFF  
FFFFFFFFFFFFF:FFFFFFFFFFFFFFFFFFFFFFFFFFFFFFFFFFFFFFFFFFFFFFFFFFFFFFFFFFFFF  
@A00155:342:HHGFNDSXY:1:2535:30327:18599 2:N:0:GAACCTAG+TCCGCATA  
GTGAACAAGCCCGAGTACATCTCCTTTGGAACCAGGAGACCCCTCCGGTCTTGTCCAACCTCTGTTT  
CGGCAGAGGATACCGTGCTCCACAGCTGTAAGGCTGTGGGCCCGAGAGAAGTCGCTCTCTCTCGCCCT  
+  
FFFFFFFFFFFFFFFFFFFFFFFFFFFFFFFFFFFFFFFFFFFFFFFFFFFFFFFFFFFFFFFFFFFFFFFFF:  
FFFFFFFFFFFFFFFFFFFFFFFFFFFFFFFFFFFFFFFF:FFFFFFFFFFFFFFFFFFFFFFFFFFFFFFFF:FFFFFFF  
@A00155:342:HHGFNDSXY:1:2535:18484:19445 2:N:0:GAACCTAG+TCCGCATA  
AAAAGGACTCGTCAGGTAGCCTACTAGACTACGACTTACACGGTAGGTCGTGAACAAGCCCGAGTAC  
ATCTCCTTTGGAAGTACGAGACCCCTCCGGTCTTGTCCAACCTCTGTTTCGGCAGAGGATACCGTGCT  
+  
FFFFFFFFFFFFFFFFFFFFFFFFFFFFFFFFFFFFFFFFFFFFFFFFFFFFFFFFFFFFFFFFFFFFFFFFF  
FFFFFFFFFFFFFFFFFFFFFFFFFFFFFFFFFFFFFFFFFFFFFFFFFFFFFFFFFFFFFFFFFFFFFFFFF:FFFFFFF  
@A00155:342:HHGFNDSXY:1:2535:11080:20087 2:N:0:GAACCTAG+TCCGCATA  
CGGCAGAGGATACCGTGCTCCACAGCTGTAAGGCTGTGGGCCCGAGAGAAGTCGCTCTCTCTCGCCCT

CCACATCCCTCTCGGCATTGAGATGACCATAGGCCAGAGGTGAGTCCTTAAGTGGACACAGCTGATCT  
+  
FFFFFFFFFFFFFFFFFFFFFFFFFFFFFFFFFFFFFFFFFFFFFFFFFFFFFFFFFFFFFFFFFFFFFFFF  
FFFFFFFFFFFFFFFFFFFFFFFFFFFFFFFFFFFFFFFFFFFFFFFFFFFFFFFFFFFFFFFFFFFFFFFF  
@A00155:342:HHGFNDSXY:1:2535:14805:23813 2:N:0:GAACCTAG+TCCGCATA  
ACCTCTGTTTCGGCAGAGGATACCGTGCTCCACAGCTGTAAGGCTGTGGGCCCGAGAGAAGTCGCTCT  
CTCTCGCCCTTCACATCCCTCTCGGCATTGAGATGACCATAGGCCAGAGGTGAGTCCTTAAGTGGAC  
+  
FFFFFFFFFFFFFFFFFFFFFFFFFFFFFFFFFFFFFFFFFFFFFFFFFFFFFFFFFFFFFFFFFFFFFFFF  
FFFFFFFFFFFFFFFFFFFFFFFFFFFFFFFFFFFFFFFFFFFFFFFFFFFFFFFFFFFFFFFFFFFFFFFF  
@A00155:342:HHGFNDSXY:1:2535:22209:28213 2:N:0:GAACCTAG+TCCGCATA  
AGTAACGACGGTTTCGTCCTTGGAACGGACTCATCAGGGAGCCTACTAGACTCCGACCGTCATGGGGG  
TTCAAACCCATGCCCCGCCACACCGCCTTAGATCAGCTGTGTCCACTTAAGGACTCACCTCTGGCCTA  
+  
FFFFFFFFFFFFFFFFFFFFFFFFFFFFFFFFFFFFFFFFFFFFFFFFFFFFFFFFFFFFFFFFFFFFFFFF  
FFFFFFFFFFFFFFFFFFFFFFFFFFFFFFFFFFFFFFFFFFFFFFFFFFFFFFFFFFFFFFFFFFFFFFFF  
@A00155:342:HHGFNDSXY:1:2535:6560:32362 2:N:0:GAACCTAG+TCCGCATA  
CCCGGAGTACATCTCCTTTGGAAGTACAGGAGACCCCTCCGGTCTTGTCCAACCTCTGTTTCGGCAGAGG  
ATACCGTGCTCCACAGCTGTAAGGCTGTGGGCCCGAGAGAAGTCGCTCTCTCTCGCCCTCCACATCCC  
+  
FFFFFFFFFFFFFFFFFFFFFFFFFFFFFFFFFFFFFFFFFFFFFFFFFFFFFFFFFFFFFFFFFFFFFFFF:FFFF  
FFFFFFFFFFFFFFFF,FFFFFFFFFFFFFFFFFFFFFFFFFFFFFFFFFFFFFFFFFFFFFFFF:FFFFFFF,FFF  
@A00155:342:HHGFNDSXY:1:2536:1271:14497 2:N:0:GAACCTAG+TCCGCATA  
CGGTAGGTCGTGAACAAGCCCGGAGTACATCTCCTTTGGAAGTACAGGAGACCCCTCCGGTCTTGTCCAA  
CCTCTGTTTCGGCAGAGGATACCGTGCTCCACAGCTGTAAGGCTGTGGGCCCGAGAGAAGTCGCTCTC  
+  
:FFF:FFFF:F,:F:FFF:FFF:F:FF:FF:FFF::FF,FFF:FF:F,FF:F:F:FFF:FFFFFF::  
FFFFFFFF:FFF::,FF:F::FF:FF:FFF::FFFF:,FFFFFFFFF:,FF:FFF::FFF:FFFF:  
@A00155:342:HHGFNDSXY:1:2536:22932:25113 2:N:0:GAACCTAG+TCCGCATA  
AGGACGAAACCGTCGTTACTCTTCGAGTTGTGTAAGTTTCGTCCTAAAAAGGACTCGTCAGGTAGCCT  
ACTAGACTACGACTTACACGGTAGGTCGTGAACAAGCCCGGAGTACATCTCCTTTGGAAGTACGAGAC  
+  
FFFFFFFFFFFF:FFFFFFFFFFFFFFFFFFFFFFFFFFFFFFFFFFFFFFFFFFFFFFFF:FFFFFFFFFFFFFFFF  
FFFFFFFFFFFFFFFFFFFFFFFFFFFFFFFFFFFFFFFFFFFFFFFF:FFFFFFFFFFFFFFFF:FFFFFFFFFFFFFFFF  
@A00155:342:HHGFNDSXY:1:2537:20528:4507 2:N:0:GAACCTAG+TCCGCATA  
CGTCCTAAAAAGGACTCGTCAGGTAGCCTACTAGACTACGACTTACACGGTAGGTCGTGAACAAGCCC  
GGAGTACATCTCCTTTGGAAGTACGAGACCCCTCCGGTCTTGTCCAACCTCTGTTTCGGCAGAGGAT  
+  
FFFFFFFFF,FFFFFFFFFFFFFFFFFFFFFFFFFFFFFFFFFFFFFFFFFFFFFFFFFFFFFFFFFFFFFFFF  
FFFFFFF::FFFFFFFFF:FFFFFFFFFFFFFFFFFFFFFFFFFFFFFFFFFFFFFFFFFFFFFFFF:FFFF  
@A00155:342:HHGFNDSXY:1:2537:28610:7670 2:N:0:GAACCTAG+TCCGCATA  
GACGAAACCGTCGTTACTCTTTGAGTTGTGTAAGTTTCGTCCTAAAAAGGACTCGTCAGGTAGCCTAC  
TAGACTACGACTTACACGGTAGGTCGTGAACAAGCCCGGAGTACATCTCCTTTGGAAGTACGAGACCC  
+  
FFFFFFFFF:FFFFFFFFF::FFFFFFFFF:FFFFFFFFFFFFFFFF:FFFFFFFFFFFFFFFF:FFFF:F  
FFFFFF:FFFFFFFFFFFFFFFFFFFFFFFFFFFFFFFFFFFFFFFFFFFFFFFF:FFFFFFFFFFFFFFFF  
@A00155:342:HHGFNDSXY:1:2537:16514:35634 2:N:0:GAACCTAG+TCCGCATA  
CACGGTAGGTCGTGAACAAGCCCGGAGTACATCTCCTTTGGAAGTACGAGACCCCTCCGGTCTTGTCC  
AACCTCTGTTTCGGCAGAGGATACCGTGCTCCACAGCTGTAAGGCTGTGGGCCCGAGAGAAGTCGCTC  
+  
FFFFFFFFF:FFFFFFFFFFFFFFFFFFFFFFFFFFFFFFFFFFFFFFFFFFFFFFFF:FFFFFF:FFFFFFFF:FFFFF  
FFFFFFFFFFFFFFFFFFFFFFFFFFFFFFFFFFFFFFFFFFFFFFFFFFFFFFFFFFFFFFFFFFFFFFFF:F  
@A00155:342:HHGFNDSXY:1:2538:23701:11036 2:N:0:GAACCTAG+TCCGCATA  
GGACTCGTCAGGTAGCCTACTAGACTACGACTTACACGGTAGGTCGTGAACAAGCCCGGAGTACATCT

CCTTTGGAAGTAGGAGACCCCTCCGGTCTTGTCCAACCTCTGTTTCGGCAGAGGATACCGTGCTCCAC  
+  
FFF:FFFFFFFFFFFFFFFFFFFFFFFFFFFFFFFFFFFFFFFFFFFFFFFFFFFFFFFFFFFFFFFFFFFFFFFF  
FFFFFFFFFFFFFFFFFFFFFFFFFFFFFFFFFFFFFFFFFFFFFFFFFFFFFFFFFFFFFFFFFFFFFFFF:FFFF  
@A00155:342:HHGFNDSXY:1:2539:2211:16752 2:N:0:GAACCTAG+TCCGCATA  
CCTACTAGACTACGACTTACACGGTAGGTCGTGAACAAGCCCGGAGTACATCTCCTTTGGAAGTAGGA  
GACCCCTCCGGTCTTGTCCAACCTCTGTTTCGGCAGAGGATACCGTGCTCCACAGCTGTAAGGCTGTG  
+  
FFFFFFFFFFFFFFFF:FFFFFFFFFFFFFFFFFFFFFFFFFFFFFFFF:FFFFFFFFFFFF:FFF:FFFFFFFF:FFF  
FFFFFFFFFFFFFFFFFFFFFFFFFFFFFFFF:FFFFFF:FF,F:FFFFFFFFFFFFFFFFFFFFFFFF:FFFFFF  
@A00155:342:HHGFNDSXY:1:2539:11586:35243 2:N:0:GAACCTAG+TCCGCATA  
AGGACGAAACCGTCGTTACTCTTCGAGTTGTGTAAGTTTCGTCCTAAAAAGGACTCGTCAGGTAGCCT  
ACTAGACTACGACTTACACGGTAGGTCGTGAACAAGCCCGGAGTACATCTCCTTTGGAAGTAGGAGAC  
+  
FFFFFFFFFFFFFFFFFFFFFFFFFFFFFFFFFFFFFFFFFFFFFFFFFFFFFFFFFFFFFFFFFFFFFFFFFFFF  
FFFFFFFFFFFFFFFFFFFFFFFFFFFFFFFFFFFFFFFFFFFFFFFFFFFFFFFFFFFFFFFFFFFFFFFF:FFFFFFFFFFFF  
@A00155:342:HHGFNDSXY:1:2540:25572:16814 2:N:0:GAACCTAG+TCCGCATA  
AAAAGGACTCGTCAGGTAGCCTACTGGACTACGACTTACACGGTAGGTCGTGAACAAGCCCGGAGTAC  
ATCTCCTTTGGAAGTAGGAGACCCCTCCGGTCTTGTCCAACCTCTGTTTCGGCAGAGGATACCGTGCT  
+  
FFFFFFFFFFFFFFFFFFFFFFFFFFFFFFFFFFFFFFFFFFFFFFFFFFFFFFFFFFFFFFFFFFFFFFFFFFFF  
FFFFFFFFFFFFFFFFFFFFFFFFFFFFFFFFFFFFFFFFFFFFFFFFFFFFFFFFFFFFFFFFFFFFFFFFFFFF  
@A00155:342:HHGFNDSXY:1:2540:20880:18427 2:N:0:GAACCTAG+TCCGCATA  
ACTAGACTACGACTTACACGGTAGGTCGTGAACAAGCCCGGAGTACATCTCCTTTGGAAGTAGGAGAC  
CCCTCCGGTCTTGTCCAACCTCTGTTTCGGCAGAGGATACCGTGCTCCACAGCTGTAAGGCTGTGGGC  
+  
FFFFFFFFFFFFFFFFFFFFFFFFFFFFFFFFFFFFFFFFFFFFFFFFFFFFFFFFFFFFFFFFFFFFFFFFFFFF  
:FFFFFFFFFFFFFFFFFFFFFFFFFFFFFFFFFFFFFFFFFFFFFFFFFFFFFFFFFFFFFFFFFFFFFFFFFFFF  
@A00155:342:HHGFNDSXY:1:2540:20835:18630 2:N:0:GAACCTAG+TCCGCATA  
ACTAGACTACGACTTACACGGTAGGTCGTGAACAAGCCCGGAGTACATCTCCTTTGGAAGTAGGAGAC  
CCCTCCGGTCTTGTCCAACCTCTGTTTCGGCAGAGGATACCGTGCTCCACAGCTGTAAGGCTGTGGGC  
+  
FFFFFFFFFFFFFFFFFFFFFFFFFFFFFFFFFFFFFFFFFFFFFFFFFFFFFFFFFFFFFFFFFFFFFFFFFFFF  
F:FFFFFFFFFFFFFFFFFFFFFFFFFFFFFFFFFFFFFFFFFFFFFFFFFFFFFFFFFFFFFFFFFFFFFFFFFFFF  
@A00155:342:HHGFNDSXY:1:2541:23791:3020 2:N:0:GAACCTAG+TCCGCATA  
AAAAGGACTCGTCAGGTAGCCTACTAGACTACGACTTACACGGTAGGTCGTGAACAAGCCCGGAGTAC  
ATCTCCTTTGGAAGTAGGAGACCCCTCCGGTCTTGTCCAACCTCTGTTTCGGCAGAGGATACCGTGCT  
+  
FFFFFFFFFFFFFFFFFFFFFFFFFFFFFFFFFFFFFFFFFFFFFFFFFFFFFFFFFFFFFFFFFFFFFFFFFFFF  
FFFFFFFFFFFFFFFFFFFFFFFFFFFFFFFFFFFFFFFFFFFFFFFFFFFFFFFFFFFFFFFFFFFFFFFFFFFF  
@A00155:342:HHGFNDSXY:1:2541:16785:5165 2:N:0:GAACCTAG+TCCGCATA  
TCCAAGGACGAAACCGTCGTTACTCTTCGAGTTGTGTAAGTTTCGTCCTAAAAAGGACTCGTCAGGTA  
GCCTACTAGACTACGACTTACACGGTAGGTCGTGAACAAGCCCGGAGTACATCTCCTTTGGAAGTAGG  
+  
FFFFFFFFFFFFFFFFFFFFFFFFFFFFFFFFFFFFFFFFFFFFFFFF:F:FFFF:FFFFFFFFFFFF:FFFFFFFFFFFFFFFFFFFF  
FFFFFFFFFFFFFFFFFFFFFFFFFFFFFFFFFFFFFFFFFFFFFFFFFFFFFFFFFFFFFFFFFFFFFFFFFFFF:FFFFFFFFFFFFFFFFFFFF  
@A00155:342:HHGFNDSXY:1:2541:20573:17738 2:N:0:GAACCTAG+TCCGCATA  
CACGGTAGGTCGTGAACAAGCCCGGAGTACATCTCCTTTGGAAGTAGGAGACCCCTCCGGTCTTGTCC  
AACCTCTGTTTCGGCAGAGGATACCGTGCTCCACAGCTGTAAGGCTGTGGGCCCGAGAGAAGTCGCTC  
+  
FF:FF:FF,FFFFFFFFFFFFFFFFFFFFFFFFFFFFFFFF:FFFFFF:FFFFFFFFFFFF:FFFFFFFFFFFF:FFF:FFF  
:FFFFFFFFFFFF:FF,FFFFFFFFFFFFFFFFFFFFFFFFFFFFFFFF:FFF:FFFF:FFFFFFFF:FFF:FFFFFFFF  
@A00155:342:HHGFNDSXY:1:2541:28140:20948 2:N:0:GAACCTAG+TCCGCATA  
CGAGTTGTGTAAGTTTCGTCCTAAAAAGGACTCGTCAGGTAGCCTACTAGACTACGACTTACACGGTA

GGTCGTGAACAAGCCCGGAGTACATCTCCTTTGGAAGTAGGAGACCCCTCCGGTCTTGTCCAACCTCT  
+  
FFFFFFFFF:F:FFFFFFFFFFFFFFFFFFFFFFFFFFFFFFFFFFFFFFFFFFFFFFFFFFFFFFFFFFFFFFFFF:FFF:FFFF  
FFFFFFFFFFFFFFFFFFFFFFFFFFFFFFFFFFFFFFFFFFFFFFFFFFFFFFFFFFFFFFFFFFFFFFFFF:FFFFFFFFFFFFFFFFFFFFFFFFF  
@A00155:342:HHGFNDSXY:1:2541:4209:22623 2:N:0:GAACCTAG+TCCGCATA  
GTGTAAGTTTCGTCCTAAAAAGGACTCGTCAGGTAGCCTACTAGACTACGACTTACACGGTAGGTCGT  
GAACAAGCCCGGAGTACATCTCCTTTGGAACCAGGAGACCCCTCCGGTCTTGTCCAACCTCTGTTTCG  
+  
FFFFFFFFFFF:FFFFFFFFFFFFFFFFFFFFFFFFFFFFFFFFFFFFFFFFFFFFFFFFFFFFFFFFFFFFFFFFF  
F:FFFFFFFFFFFFFFFFFFFFFFFFF:FFFFFFFFFFFFFFFFFFFFFFFFFFFFFFFFFFFFFFFFFFFFFFFFF  
@A00155:342:HHGFNDSXY:1:2542:7301:6684 2:N:0:GAACCTAG+TCCGCATA  
AGTACATCTCCTTTGGAAGTAGGAGACCCCTCCGGTCTTGTCCAACCTCTGTTTCGGCAGAGGATACC  
GTGCTCCACAGCTGTAAGGCTGTGGGCCCCGAGAGAAGTCGCTCTCTCTCGCCCTCTACATCCCTCTCG  
+  
FFFFFFFFFFFFFFFFFFFFFFFFFFFFFFFFFFFFFFFFFFFFFFFFFFFFFFFFFFFFFFFFFFFFFFFFF  
FFFFFFFFFFFFFFFFFFFFFFFFFFFFFFFFFFFFFFFFFFFFFFFFFFFFFFFFFFFFFFFFFFFFFFFFF  
@A00155:342:HHGFNDSXY:1:2542:32832:16078 2:N:0:GAACCTAG+TCCGCATA  
GACCCCTCCGGTCTTGTCCAACCTCTGTTTCGGCAGAGGATACCGTGCTCCACAGCTGTAAGGCTGTG  
GGCCCCGAGAGAAGTCGCTCTCTCTCGCCCTCCACATCCCTCTCGGCATTGAGATGACCATAG  
+  
FFFFFFFFFFFFFFFFFFFFFFFFFFFFFFFFFFFFFFFFFFFFFFFFFFFFFFFFFFFFFFFFFFFFFFFFF  
FFFFFFF:FFF:FFFFFFFFFFFFFFFFFFFFFFFFFFFFFFFFFFFFFFFFFFFFFFFFFFFFFFFFFFFFF  
@A00155:342:HHGFNDSXY:1:2542:11360:22889 2:N:0:GAACCTAG+TCCGCATA  
GAGACCCCTCCGGTCTTGTCCAACCTCTGTTTCGGCAGAGGATACCGTGCTCCACAGCTGTAAGGCTG  
TGGCCCCGAGAGAAGTCGCTCTCTCTCGCCTTCCACATCCCTCTCGGCATTGAGATGACCATAGGCCA  
+  
FFFFFFFFFFFFFFFFFFFFFFFFFFFFFFFFFFFFFFFFFFFFFFFFFFFFFFFFFFFFFFFFFFFFFFFFF  
FFFFFFFFFFFFFFFFFFFFFFFFFFFFFFFFFFFFFFFFFFFFFFFFFFFFFFFFFFFFFFFFFFFFFFFFF:FFF,FFFFFFFFFFFFFFFFF  
@A00155:342:HHGFNDSXY:1:2542:2220:28635 2:N:0:GAACCTAG+TCCGCATA  
GGAACGGACTCATCAGGGAGCCTACTAGACTCCGACCGTCATGGGGGTTCAAACCCATGCCCCGCCAC  
ACCGCCTTAGATCAGCTGTGTCCACTTAAGGACTCACCTCTGGCCTATGGTCATCTCAATGCCGAGAG  
+  
FFFFFFFFF:FFFF::FFFFFFFFFFF:F:FFFFFFFFFFFFFFFFFFFFFFFFFFFFFFFFF,FFFFFFFF,FFFFFFFF  
FFF:FFFF:F:FF,FFFFFFFF:FFFFFFFFFFFFFFFFFFFFFFFFF,FF,FFFFFFFF,FFFF:FF,F,FFF,F  
@A00155:342:HHGFNDSXY:1:2542:31096:29951 2:N:0:GAACCTAG+TCCGCATA  
AAGGACGAAACCGTCGTTACTCTTCGAGTTGTGTAAGTTTCGTCCTAAAAAGGACTCGTCAGGTAGCC  
TACTAGACTACGACTTACACGGTAGGTCGTGAACAAGCCCGGAGTACATCTCCTTTGGAAGTAGGAGA  
+  
FFFFFFFFFFFFFFFFFFFFFFFFFFFFFFFFFFFFFFFFF:F:FFFFFFFFFFFFFFFFFFFFFFFFF:FFFFFFFFF  
FFFFFFFFFFFFFFFFFFFFFFFFFFFFFFFFFFFFFFFFFFFFFFFFFFFFFFFFFFFFFFFFFFFFFFFFF:FFFF,FFFFFFFF  
@A00155:342:HHGFNDSXY:1:2542:13584:32878 2:N:0:GAACCTAG+TCCGCATA  
AAAAGGACTCGTCAGGTAGCCTACTAGACTACGACTTACACGGTAGGTCGTGAACAAGCCCGGAGTAC  
ATCTCCTTTGGAAGTAGGAGACCCCTCCGGTCTTGTCCAACCTCTGTTTCGGCAGAGGATACCGTGCT  
+  
FFFF:FF,FF,:FF:FFFFFFFFF:FFFF:FFFF:FFFF:FFF::F,,FFFFFFFF,,FF:FFFFFF  
FFFF,FFFFFFFFFFFFFFFFFFFFFFFFFFFFFFFFF:FFFF:FFFFFFFFFFFFF:,FFFFFFFFF,:,:F  
@A00155:342:HHGFNDSXY:1:2542:22236:33238 2:N:0:GAACCTAG+TCCGCATA  
GAACGTCAGGTAGCCTACTAGACTACGACTTACACGGTAGGTCGTGAACAAGCCCGGAGTACATCT  
CCTTTGGAAGTAGGAGACCCCTCCGGTCTTGTCCAACCTCTGTTTCGGCAGAGGATACCGTGCTCCAC  
+  
FFFFFFFFFFFFFFFFFFFFFFFFFFFFFFFFFFFFFFFFFFFFFFFFFFFFFFFFFFFFFFFFFFFFFFFFF  
FFFFFFFFFFFFFFFFFFFFFFFFFFFFFFFFFFFFFFFFFFFFFFFFFFFFFFFFFFFFFFFFFFFFFFFFF:FFFFFFFFF  
@A00155:342:HHGFNDSXY:1:2542:25663:36699 2:N:0:GAACCTAG+TCCGCATA  
CCCCTCCGGTCTTGTCCAACCTCTGTTTCGGCAGAGGATACCGTGCTCCACAGCTGTAAGGCTGTGGG

CCCGAGAGAAGTCGCTCTCTCTCGCCCTTCACATCCCTCTCGGCATTGAGATGACCATAGGCCAG  
+  
FFFFFFFFFFFFFFFFFFFFFFFFFFFFFFFFFFFFFFFFFFFFFFFFFFFFFFFFFFFFFFFFFFFFFFFFF  
FFFFFFFFF:FFFFFFFFFFFFFFFFFFFFFFFFFFFFFFFFFFFFFFFFFFFFFFFFFFFFFFFFFFFFFFF  
@A00155:342:HHGFNDSXY:1:2543:27959:4726 2:N:0:GAACCTAG+TCCGCATA  
AAAAGGACTCGTCAGGTAGCCTACTAGACTACGACTTACACGGTAGGTCGTGAACAAGCCCGGAGTAC  
ATCTCCTTTGGAAGTAGGAGACCCCTCCGGTCTTGTCCAACCTCTGTTTCGGCAGAGGATACCGTGCT  
+  
FFFFFFFFFFFFFFFFFFFFFFFFFFFFFFFFFFFFFFFFFFFFFFFFFFFFFFFFFFFFFFFFFFFFFFFFF:  
FFFFFFFFFFFFFFF:FFFFFFFFF:FFFFFFFFFFFFFFFFFFFFFFFFFFFFFFFFFFFFFFFFFFFFFFF,FFF  
@A00155:342:HHGFNDSXY:1:2543:18376:18756 2:N:0:GAACCTAG+TCCGCATA  
GAACTAGGAGACCCCTCCGGTCTTGTCCAACCTCTGTTTCGGCAGAGGATACCGTGCTCCACAGCTGT  
AAGGCTGTGGGCCCGAGAGAAGTCGCTCTCTCTCGCCCTCCACATCCCTCTCGGCATTGAGATGACCA  
+  
FFFFFFFFFFFFFFFFFFFFFFFFFFFFFFFFFFFFFFFFFFFFFFFFFFFFFFFFFFFFFFFFFFFFFFFFF  
F:FFFFFFFFFFFFFFFFFFFFFFFFFFFFFFFFFFFFFFFFFFFFFFFFFFFFFFFFFFFFFFFFFFFFFFFFF  
@A00155:342:HHGFNDSXY:1:2543:25482:27336 2:N:0:GAACCTAG+TCCGCATA  
GGACTCGTCAGGTAGCCTACTAGACTACGACTTACACGGTAGGTCGTGAACAAGCCCGGAGTACATCT  
CCTTTGGAAGTAGGAGACCCCTCCGGTCTTGTCCAACCTCTGTTTCGGCAGAGGATACCGTGCTCCAC  
+  
FFFFFFFFFFFFFFFFFFFFFFFFFFFFFFFFFFFFFFFFFFFFFFFFFFFFFFFFFFFFFFFFFFFFFFF,FFFFFFFFFFFFFFFFF  
FFFFFFFFF,:FFFFFFFFF:FFFFFFFFFFFFFFFFFFFFFFFFFFFFFFFFFFFFFFFFFFFFFFFFFFFFFFF  
@A00155:342:HHGFNDSXY:1:2544:17219:3035 2:N:0:GAACCTAG+TCCGCATA  
GGAGTACATCTCCTTTGGAAGTAGGAGACCCCTCCGGTCTTGTCCAACCTCTGTTTCGGCAGAGGATA  
CCGTGCTCCACAGCTGTAAGGCTGTGGGCCCGAGAGAAGTCGCTCTCTCTCGCCCTCCACATCCCTCT  
+  
FFFFFFFFFFFFFFFFFFFFFFFFFFFFFFFFFFFFFFFFFFFFFFFFFFFFFFFFFFFFFFFFFFFFFFFFF  
FFFFFFFFFFFFFFFFFFFFFFFFFFFFFFFFFFFFFFFFFFFFFFFFFFFFFFFFFFFFFFFFFFFFFFFFF  
@A00155:342:HHGFNDSXY:1:2544:13928:35759 2:N:0:GAACCTAG+TCCGCATA  
CCCCTCCGGTCTTGTCCAACCTCTGTTTCGGCAGAGGATACCGTGCTCCACAGCTGTAAGGCTGTGGG  
CCCGAGAGAAGTCGCTCTCTCTCGCCCTTCACATCCCTCTCGGCATTGAGATGACCATAGGCCAGAGG  
+  
FFFFFFFFFFFFF,FFFFFF:FFFFFFFFFFFFFFFFFFFFFFFFFFFFFFFFFFFFFFFFFFFFFFFFFFFFFFF  
FFFF,FFFF:FFFFFFFFFFFFF:FFFFFFFFFFFFFFFFFFFFFFFFFFFFFFFFFFFFFFFFFFFFFFFFF  
@A00155:342:HHGFNDSXY:1:2545:25174:14967 2:N:0:GAACCTAG+TCCGCATA  
AGAGTTGTGTAAGTTTCGTCCTAAAAAGGACTCGTCAGGTAGCCTACTAGACTACGACTTACACGGTA  
GGTCGTGAACAAGCCCGGAGTACATCTCCTTTGGAAGTAGGAGACCCCTCCGGTCTTGTCCAACCTCT  
+  
FFFFFFFFFFFFFFFFFFFFFFFFFFFFFFFFFFFFFFFFFFFFFFFFFFFFFFFFFFFFFFFFFFFFFFFFF:FFFFFFFFF:FFFFFFFFFFFFF  
FFFFFFFFF:F:FFFFFFFFFFFFFFFFFFFFFFFFFFFFFFFFF:FFFFFFFFFFFFFFFFFFFFFFFFF:FFFFFFFFFFFFF  
@A00155:342:HHGFNDSXY:1:2545:5936:30467 2:N:0:GAACCTAG+TCCGCATA  
CTACTAGACTACGACTTACACGGTAGGTCGTGAACAAGCCCGGAGTACATCTCCTTTGGAACCAGGAG  
ACCCCTCCGGTCTTGTCCAACCTCTGTTTCGGCAGAGGATACCGTGCTCCACAGCTGTAAGGCTGTGG  
+  
FFFFFFF:FFFFFFFFFFFFFFFFFFFFFFFFF:FFF,FFFFFFFFF,FF,FFFFFFFFFFFFF,FFFFFFFFF,FFF  
FFFFFFFFF,FFFFFFFFF,FF::FFFF,FFFF,FFFFFFFF,FFFFFFFFF:FF:FFFF:, :FFFF:::FF  
@A00155:342:HHGFNDSXY:1:2545:27859:35994 2:N:0:GAACCTAG+TCCGCATA  
GGACTCGTCAGGTAGCCTACTAGACTACGACTTACACGGTAGGTCGTGAACAAGCCCGGAGTACATCT  
CCTTTGGAAGTAGGAGACCTCTCCGGTCTTGTCCAACCTCTGTTTCGGCAGAGGATACCGTGCTCCAC  
+  
FFFFFFFFFFFFFFFFFFFFFFFFF:FFFFFFFFFFFFFFFFFFFFFFFFFFFFFFFFF,FFFFFFFFFFFFFFFFF  
FFFFFFFFF,F:FFF:FFFFFFFFFFFFFFFFFFFFFFFFFFFFFFFFFFFFFFFFFFFFFFFFFFFFF,FFFFFFFFFFFFF  
@A00155:342:HHGFNDSXY:1:2546:32859:26396 2:N:0:GAACCTAG+TCCGCATA  
GTACTCCGGGCTTGTTCA



```

+
FFFFFFFFFFFFFFFFFFFF
@A00155:342:HHGFNDSXY:1:2547:20600:14497 2:N:0:GAACCTAG+TCCGCATA
AGTACATCTCCTTTGGAAGTACGAGACCCCTCCGGTCTTGTCCAACCTCTGTTTCGGCAGAGGATACC
GTGCTCCACAGCTGTAAGGCTGTGGGCCCCGAGAGAAGTCGCTCTCTCTCGCCCTCTACATCCCTCTCG
+
FFFFFFFFFFFFFF:FFFFFFFFFFFFFFFFFFFFFFFFFFFFFFFFFFFFFFFFFFFFFFFFFFFFFFFFFFFFFFFF
FFFFFFFFFFFFFFFFFFFFFFFFFFFFFFFFFFFFFFFFFFFFFFFFFFFFFFFFFFFFFFFFFFFFFFFFFFFFFFFF
@A00155:342:HHGFNDSXY:1:2547:26015:19680 2:N:0:GAACCTAG+TCCGCATA
CACGGTAGGTCGTGAACAAGCCCGAGTACATCTCCTTTGGAAGTACGAGACCCCTCCGGTCTTGTCC
AACCTCTGTTTCGGCAGAGGATACCGTGCTCCACAGCTGTAAGGCTGTGGGCCCCGAGAGAAGTCGCTC
+
FFFFFFFFFFFF:FFFFFFFFFFFFFFFFFFFFFFFFFFFFFFFFFFFFFFFFFFFFFFFFFFFFFFFFFFFFFFFF
FFFFFFFFFFFFFFFFFFFFFFFFFFFFFFFFFFFFFFFFFFFFFFFFFFFFFFFFFFFFFFFFFFFFFFFFFFFFFFFF
@A00155:342:HHGFNDSXY:1:2548:3784:9111 2:N:0:GAACCTAG+TCCGCATA
GACCCCTCCGGTCTTGTCCAACCTCTGTTTCGGCAGAGGATACCGTGCTCCACAGCTGTAAGGCTGTG
GGCCCCGAGAGAAGTCGCTCTCTCTCGCCCTCCACATCCCTCTCGGCATTGAGATGACCATAGGC
+
FFFFFFFFFFFFFFFFFFFFFFFFFFFFFFFFFFFFFFFFFFFFFFFFFFFFFFFFFFFFFFFFFFFFFFFFFFFFFFFF
FFFFFFFFFFFFFFFFFFFFFFFFFFFFFFFFFFFFFFFFFFFFFFFFFFFFFFFFFFFFFFFFFFFFFFFFFFFFFFFF
@A00155:342:HHGFNDSXY:1:2548:28700:12931 2:N:0:GAACCTAG+TCCGCATA
AGTACATCTCCTTTGGAAGTACGAGACCCCTCCGGTCTTGTCCAACCTCTGTTTCGGCAGAGGATACC
GTGCTCCACAGCTGTAAGGCTGTGGGCCCCGAGAGAAGTCGCTCTCTCTCGCCCTCCACATCCCTCTCG
+
FFFFFFFFFFFFFF:FFFFFFFFFFFFFFFFFFFFFFFFFFFFFFFFFFFFFFFFFFFFFFFFFFFFFFFFFFFFFFFF
FFFFFFFFFFFFFFFFFFFFFFFFFFFFFFFFFFFFFFFFFFFFFFFFFFFFFFFFFFFFFFFFFFFFFFFFFFFFFFFF
@A00155:342:HHGFNDSXY:1:2548:26323:22247 2:N:0:GAACCTAG+TCCGCATA
CCTTTGGAAGTACGAGACCCCTCCGGTCTTGTCCAACCTCTGTTTCGGCAGAGGATACCGTGCTCCAC
AGCTGTAAGGCTGTGGGCCCCGAGAGAAGTCGCTCTCTCTCGCCCTCCACATCCCTCTCG
+
FFFFFFFFFFFFFFFFFFFFFFFFFFFFFFFFFFFFFFFFFFFFFFFFFFFFFFFFFFFFFFFFFFFFFFFFFFFFFFFF
FFFFFFFFFFFFFFFFFFFFFFFFFFFFFFFFFFFFFFFFFFFFFFFFFFFFFFFFFFFFFFFFFFFFFFFFFFFFFFFF
@A00155:342:HHGFNDSXY:1:2549:16025:11209 2:N:0:GAACCTAG+TCCGCATA
TAGGTCGTGAACAAGCCCGAGTACATCTCCTTTGGAAGTACGAGACCCCTCCGGTCTTGTCCAACCT
CTGTTTCGGCAGAGGATACCGTGCTCCACAGCTGTAAGGCTGTGGGCCCCGAGAGAAGTCGCTCTCTCT
+
FFFFFFFFFFFFFFFFFFFFFFFFFFFFFFFFFFFFFFFFFFFFFFFFFFFFFFFFFFFFFFFFFFFFFFFFFFFFFFFF
FFFFFFFFFFFFFFFFFFFFFFFFFFFFFFFFFFFFFFFFFFFFFFFFFFFFFFFFFFFFFFFFFFFFFFFFFFFFFFFF
@A00155:342:HHGFNDSXY:1:2549:7690:15029 2:N:0:GAACCTAG+TCCGCATA
GTCCTAAAAAGGACTCGTCAGGTAGCCTACTAGACTACGACTTACACGGTAGGTCGTGAACAAGCCCG
GAGTACATCTCCTTTGGAAGTACGAGACCCCTCCGGTCTTGTCCAACCTCTGTTTCGGCAGAGGATAC
+
FFFFFFFFFFFF,FFFFFFFFFFFFFFFFFFFFFFFFFFFFFFFFFFFFFFFFFFFFFFFFFFFFFFFFFFFFFFFF
FFFFFFFFFFFFFFFFFFFFFFFFFFFFFFFFFFFFFFFFFFFFFFFFFFFFFFFFFFFFFFFFFFFFFFFFFFFFFFFF
@A00155:342:HHGFNDSXY:1:2550:8431:3004 2:N:0:GAACCTAG+TCCGCATA
CAAGCCCGGAGTACATCTCCTTTGGAAGTACGAGACCCCTCCGGTCTTGTCCAACCTCTGTTTCGGCA
GAGGATACCGTGCTCCACAGCTGTAAGGCTGTGGGCCCCGAGAGAAGTCGCTCTCTCTCGCC
+
FFFFFFFFFFFFFFFFFFFFFFFFFFFFFFFFFFFFFFFFFFFFFFFFFFFFFFFFFFFFFFFFFFFFFFFFFFFFFFFF
FFFFFFFFFFFFFFFFFFFFFFFFFFFFFFFFFFFFFFFFFFFFFFFFFFFFFFFFFFFFFFFFFFFFFFFFFFFFFFFF
@A00155:342:HHGFNDSXY:1:2550:6885:19179 2:N:0:GAACCTAG+TCCGCATA
TAGACTACGACTTACACGGTAGGTCGTGAACAAGCCCGAGTACATCTCCTTTGGAACCAGGAGACCC
CTCCGGTCTTGTCCAACCTCTGTTTCGGCAGAGGATACCGTGCTCCACAGCTGTAAGGCTGTGGGCCC
+

```

[illegible]

FFFFFFFFFFFFFFFF:FFFFFFFFFFFFFFFFFFFFFFFFFFFFFFFFFFFFFFFF:FFFFFFFFFFFFFFFFFFFFFFFF:FFF  
FFFFFFFFFFFFFFFF:F,FFFF:FFFFFFFFFFFFFFFFFFFFFFFFFFFFFFFF:FF,FFF:FFFFFFFF  
@A00155:342:HHGFNDSXY:1:2552:18738:19977 2:N:0:GAACCTAG+TCCGCATA  
GTTTCGTCCTAAAAAGGACTCGTCAGGTAGCCTACTAGACTACGACTTACACGGTAGGTCGTGAACAA  
GCCCGGAGTACATCTCCTTTGGAAGTAGGAGACCCCTCCGGTCTTGTCCAACCTCTGTTTCGGCAGAG  
+  
FFFFFFFFFFFFFFFFFFFFFFFF:FFFFFFFFFFFFFFFFFFFFFFFFFFFFFFFF:FFFFFFFFFFFFFFFF:FFFFF  
FFFFFFFFFFFFFFFFFFFFFFFFFFFFFFFF,FFFFFFFFFFFFFFFFFFFFFFFF:FFF:FFFFFFFFFFFFFFFF:FFFFFFFF  
@A00155:342:HHGFNDSXY:1:2553:30553:4773 2:N:0:GAACCTAG+TCCGCATA  
TCCTAAAAAGGACTCGTCAGGTAGCCTACTAGACTACGACTTACACGGTAGGTCGTGAACAAGCCCGG  
AGTACATCTCCTTTGGAAGTAGGAGACCCCTCCGGTCTTGTCCAACCTCTGTTTCGGCAGAGGATACC  
+  
FFFFFFFFFFFFFFFFFFFFFFFF:FFFFFFFFFFFFFFFFFFFFFFFFFFFFFFFFFFFFFFFF:FFFFFFFFFFFFFFFF  
FFFFFFFFFFFFFFFFFFFFFFFF:FFFFFFFFFFFFFFFFFFFFFFFFFFFFFFFF,FFFFFFFFFFFFFFFFFFFFFFFFFFFFFFFF  
@A00155:342:HHGFNDSXY:1:2553:27380:9111 2:N:0:GAACCTAG+TCCGCATA  
AAAAGGACTCGTCAGGTAGCCTACTAGACTACGACTTACACGGTAGGTCGTGAACAAGCCCGGAGTAC  
ATCTCCTTTGGAAGTAGGAGACCCCTCCGGTCTTGTCCAACCTCTGTTTCGGCAGAGGATACCGTGCT  
+  
FFFFFFFFFFFFFFFFFFFFFFFFFFFFFFFF,FFFFFFFFFFFFFFFFFFFFFFFFFFFFFFFF:FFFFFFFFFFFFFFFF  
FFFFFFFFFFFFFFFFFFFFFFFFFFFFFFFFFFFFFFFFFFFFFFFFFFFFFFFFFFFFFFFFFFFFFFFFFFFFFFFF:FFFFF  
@A00155:342:HHGFNDSXY:1:2553:27796:21104 2:N:0:GAACCTAG+TCCGCATA  
ATCAGCTGTGTCCACTTAAGGACTCACCTCTGGCCTATGGTCATCTCAATGCCGAGAGGGATGTGGAG  
GGCGAGAGAGAGCGACTTCTCTCGGGCCACAGCCTTACAGCTGTGGAGCACGGTATCCTCTGCCGAA  
+  
FFFFFFFFFFFFFFFFFFFFFFFFFFFFFFFFFFFFFFFFFFFFFFFFFFFFFFFFFFFFFFFFFFFFFFFFFFFFFFFF  
FFFFFFFFFFFFFFFFFFFFFFFFFFFFFFFFFFFFFFFFFFFFFFFFFFFFFFFFFFFFFFFFFFFFFFFFFFFFFFFF  
@A00155:342:HHGFNDSXY:1:2553:1181:23234 2:N:0:GAACCTAG+TCCGCATA  
CGGACTCATCAGGGAGCCTAATAGACTCCGACCGTCATGGGGTTCAAACCCATGCCCGCCACACCG  
CCTTAGATCAGCTGTGTCCACTTAAGGACTCACCTCTGGCCTATGGTCATCTCAATGCCGAGAGGGAT  
+  
FFFFF:FFFF:FFFFFFFFFFFF,F:F:FFFFFFFFFFFF:FFFFF:F,FFFFF:F::FFF:F:FFF  
:FFFF:FFFFFFFFF:F::FF,:FFF:FF,:FFFFFF,FF,FFFF:FF:FF,FF::,,:FFFF,F  
@A00155:342:HHGFNDSXY:1:2553:14100:35775 2:N:0:GAACCTAG+TCCGCATA  
ACACGGTAGGTCGTGAACAAGCCCGGAGTACATCTCCTTTGGAAGTAGGAGACCCCTCCGGTCTTGT  
CAACCTCTGTTTCGGCAGAGGATACCGTGCTCCACAGCTGTAAGGCTGTGGGCCCGAGAGAAGTCGCT  
+  
FFFFFFFFFFFFFFFFFFFFFFFF:FFFFFFFFFFFFFFFFFFFFFFFFFFFFFFFFFFFFFFFFFFFFFFFFFFFFFFFF  
FFFFFFFFFFFFFFFFFFFFFFFFFFFFFFFFFFFFFFFFFFFFFFFFFFFFFFFFFFFFFFFFFFFFFFFFFFFFFFFF  
@A00155:342:HHGFNDSXY:1:2554:13801:2660 2:N:0:GAACCTAG+TCCGCATA  
ACTTACACGGTAGGTCGTGAACAAGCCCGGAGTACATCTCCTTTGGAAGTAGGAGACCCCTCCGGTCT  
TGTCCAACCTCTGTTTCGGCAGAGGATACCGTGCTCCACAGCTGTAAGGCTGTGGGCCCGAGAGAAG  
+  
FFFFFFFFFFFFFFFFFFFFFFFFFFFFFFFFFFFFFFFFFFFFFFFFFFFFFFFFFFFFFFFFFFFFFFFFFFFFFFFF  
FFFFFFFFFFFFFFFFFFFFFFFFFFFFFFFFFFFFFFFFFFFFFFFFFFFFFFFFFFFFFFFFFFFFFFFFFFFFFFFF  
@A00155:342:HHGFNDSXY:1:2554:9724:3333 2:N:0:GAACCTAG+TCCGCATA  
GCCCGGAGTACATCTCCTTTGGAAGTAGGAGACCCCTCCGGTCTTGTCCAACCTCTGTTTCGGCAGAG  
GATACCGTGCTCCACAGCTGTAAGGCTGTGGGCCCGAGAGAAGTCGCTCTCTCGCCC  
+  
FFFFFFFFFFFFFFFFFFFFFFFFFFFFFFFFFFFFFFFFFFFFFFFFFFFFFFFFFFFFFFFFFFFFFFFFFFFFFFFF:FFFF:F  
FFFFFFFFFFFFFFFFFFFFFFFFFFFFFFFFFFFFFFFFFFFFFFFFFFFFFFFFFFFFFFFFFFFFFFFFFFFFFFFF:F  
@A00155:342:HHGFNDSXY:1:2554:3595:22592 2:N:0:GAACCTAG+TCCGCATA  
GTTGTGTAAGTTTCGTCCTAAAAAGGACTCGTCAGGTAGCCTACTAGACTACGACTTACACGGTAGGT  
CGTGAACAAGCCCGGAGTACATCTCCTTTGGAACAGGAGACCCCTCCGGTCTTGTCCAACCTCTGTT  
+

[illegible]

FFFF:FFFFFFFFFFFFFFFF,F:,FFFFFFFF,FFFF,FF::FFFFFFFF:F::FFFFFFFFFFFFFFF  
FFFFFFFF,FFFFFFFFFFFFFFFF,FF:FFFF,FFFFFF::FFFFFF,:FFFF:FFFF:FFF  
@A00155:342:HHGFNDSXY:1:2556:14045:27821 2:N:0:GAACCTAG+TCCGCATA  
AGATCAGCTGTGTCCACTTAAGGACTCACCTCTGGCCTATGGTCATCTCAATGCCGAGAGGGATGTGA  
AGGGCGAGAGAGAGCGACTTCTCTCGGGCCACAGCCTTACAGCTGTGGAGCACGGTATCCTCTGCCG  
+  
FFFFFFFFFFFFFFFFFFFFFFFFFFFFFFFFFFFFFFFFFFFFFFFFFFFFFFFFFFFFFFFF:FFFF  
FFFFFFFFFFFFFFFFFFFFFFFFFFFFFFFFFFFFFFFFFFFFFFFFFFFFFFFFFFFFFFFFFFFFFFF  
@A00155:342:HHGFNDSXY:1:2556:29107:35117 2:N:0:GAACCTAG+TCCGCATA  
AAACTTACACAACCTCGAAGAGTAACGACGGTTTCGTCTTGGAACGGACTCATCAGGGAGCCTACTAG  
ACTCCGACCGTCATGGGGGTTCAAACCCATGCCCCGCTACACCGCCTTAGATCAGCTGTGTCCACTTA  
+  
FFFFFFFFFFFFFFFFFFFFFFFFFFFFFFFFFFFFFFFFFFFFFFFFFFFFFFFFFFFFFFFFFFFFFFF  
FFFFFFFFFFFFFFFFFFFFFFFFFFFFFFFFFFFFFFFFFFFFFFFFFFFFFFFFFFFFFFFFFFFFFFF  
@A00155:342:HHGFNDSXY:1:2556:32786:35509 2:N:0:GAACCTAG+TCCGCATA  
GGAGTTGTGTAAGTTTCGTCTAAAAAGGACTCGTCAGGTAGCCTACTAGACTACGACTTACACGGTA  
GGTCGTGAACAAGCCCGAGTACATCTCCTTTGGAAGTACGAGACCCCTCCGGTCTTGTCCAACCTCT  
+  
FFFFFFFFFFFFFFFFFFFFFF:FFFF:FFFFFFFFFFFFFFFFFFFFFFFFFFFFFFFFFFFFFF:FFFFFFFFFFFF  
FFFF:FFFFFFFFFFFFFFFFFFFFFFFFFFFFFFFFFFFFFFFFFFFFFFFFFFFFFFFFFFFFFFFF:FFF:FF  
@A00155:342:HHGFNDSXY:1:2557:16062:1063 2:N:0:GAACCTAG+TCCGCATA  
GAGACCCCTCCGGTCTTGTCCAACCTCTGTTTCGGCAGAGGATACCGTGCTCCACAGCTGTAAGGATG  
TGGCCCCGAGAGAAGTCGCTCTCTCGCCCTCCACATCCCTCTCGGCATTGAGATGACCATAGGC  
+  
FFFFFFFFFFFFFFF:FFF:FFFFFFFFFFFFFF:FF:FFFF,F::FFFFFFFFFFFFFFF:FFF:FFFF,FF  
:F,F:FFFFFFFFFFFF:FF:FF,FFFFFFFFFFFF,FFFFFFFFFFFFFFFF::FFFFFFFFFFFF,,FFF  
@A00155:342:HHGFNDSXY:1:2557:17065:11506 2:N:0:GAACCTAG+TCCGCATA  
CTTACACGGTAGGTCTGTGAACAAGCCCGAGTACATCTCCTTTGGAAGTACGAGACCCCTCCGGTCTT  
GTCCAACCTCTGTTTCGGCAGAGGATACCGTGCTCCACAGCTGTAAGGCTGTGGGCCCGAGAGAAGTC  
+  
FFFFFFFFFFFFFFFFFFFFFFFFFFFFFFFFFFFFFFFFFFFFFFFFFFFFFFFFFFFFFFFFFFFFFFF  
FFFFFFFFFFFFFFFFFFFFFFFFFFFFFFFFFFFFFFFFFFFFFFFFFFFFFFFFFFFFFFFFFFFFFFF  
@A00155:342:HHGFNDSXY:1:2557:16423:17033 2:N:0:GAACCTAG+TCCGCATA  
GTACATCTCCTTTGGAAGTACGAGACCCCTCCGGTCTTGTCCAACCTCTGTTTCGGCAGAGGATACCG  
TGCTCCACAGCTGTAAGGCTGTGGGCCCGAGAGAAGTCGCTCTCTCTCGCCCTCCACATCCCTCTCGG  
+  
FFFFF::FF::F:FFFFFFFF,FF:FFFFFF:,,:FFFFFFFFFFFF::,F,FFFFFF:F:FFF  
F:F,FFFF:FFFFFFFF:F,FF:FF:F:FFF,FFFF:FFFF:FFFFF:FFFFF,FFFF:FFF:F  
@A00155:342:HHGFNDSXY:1:2558:15203:22936 2:N:0:GAACCTAG+TCCGCATA  
GTGAACAAGCCCGAGTACATCTCCTTTGGAAGTACGAGACCCCTCCGGTCTTGTCCAACCTCTGTTT  
CGGCAGAGGATACCGTGCTCCACAGTTGTAAGGCTGTGGGCCCGAGAGAAGTCGCTCTCTCTCGCCCT  
+  
FFFFFFFFFFFFFFFFFFFFFFFFFFFFFFFFFFFFFFFFFFFFFFFFFFFFFFFFFFFFFFFFFFFFFFF  
FFFFFFFFF:FFFFFFFFFFFFFFFFFFFFFFFFFFFFFFFFFFFFFFFFFFFFFFFFFFFFFFFFFFFFFFF  
@A00155:342:HHGFNDSXY:1:2558:23176:26506 2:N:0:GAACCTAG+TCCGCATA  
CCTACTAGACTACGACTTACACGGTAGGTCTGAACAAGCCCGAGTACATCTCCTTTGGAAGTACGAG  
GACCCCTCCGGTCTTGTCCAACCTCTGTTTCGGCAGAGGATACCGTGCTCCACAGCTGTAAGGCTGTG  
+  
FFFFFFFFFFFFFFFFFFFFFFFFFFFFFFFFFFFFFFFFFFFFFFFFFFFFFFFFFFFFFFFFFFFFFFF  
FFFFFFFFFFFFFFFFFFFFFFFFFFFFFFFFFFFFFFFFFFFFFFFFFFFFFFFFFFFFFFFFFFFFFFF  
@A00155:342:HHGFNDSXY:1:2558:10050:30358 2:N:0:GAACCTAG+TCCGCATA  
GAGTACATCTCCTTTGGAAGTACGAGACCCCTCCGGTCTTGTCCAACCTCTGTTTCGGCAGAGGATAC  
CGTGCTCCACAGCTGTAAGGCTGTGGGCCCGAGAGAAGTCGCTCTCTCTCGCCCTCCACATCCCTCTC  
+

```

FFFFFFFFFFFFFFFFFFFFFFFFFFFFFFFFFFFFFFFFFFFFFFFFFFFFFFFFFFFFFFFFFFFFFFFFF:FFFFFFFFFFFFFFFFFFFFF
FFFFFFFFFFFFFFFFFFFFFFFFFFFFFFFFFFFFFFFFFFFFFFFFFFFFFFFFFFFFFFFFFFFFFFFFF
@A00155:342:HHGFNDSXY:1:2559:22670:2018 2:N:0:GAACCTAG+TCCGCATA
TGGTCATCTCAATGCCGAGAGGGATGTGGAGGGCGAGAGAGAGCGACTTCTCTCGGGCCCACAGCCTT
ACAGCTGTGGAGCACGGTATCCTCTGCCGAAACAGAGGTTGGACAAGACCGGAGGGGTCTCCTAGTTC
+
FFFFFFFFFFFFFFFFFFFFFFFFFFFFFFFFFFFFFFFFFFFFFFFFFFFFFFFFFFFFFFFFFFFFFFFFF
FFFFFFFFFFFFFFFFFFFFFFFFFFFFFFFFFFFFFFFFFFFFFFFFFFFFFFFFFFFFFFFFFFFFFFFFF
@A00155:342:HHGFNDSXY:1:2559:11171:6965 2:N:0:GAACCTAG+TCCGCATA
GTTACTCTTCGAGTTGTGTAAGTTTCGTCCTAAAAAGGACTCGTCAGGTAGCCTACTAGACTACGACT
TACACGGTAGGTCGTGAACAAGCCCCGAGTACATCTCCTTTGGAAGTACTAGGAGACCCCTCCGGTCTTG
+
FFFFFFFFFFFFFFFFFFFFFFFFFFFFFFFFFFFFFFFFFFFFFFFFFFFFFFFFFFFFFFFFFFFFFFFFF
FFFFFFFFFFFFFFFFFFFFFFFFFFFFFFFFFFFFFFFFFFFFFFFFFFFFFFFFFFFFFFFFFFFFFFFFF
@A00155:342:HHGFNDSXY:1:2560:13584:23015 2:N:0:GAACCTAG+TCCGCATA
GGAGTACATCTCCTTTGGAAGTACTAGGAGACCCCTCCGGTCTTGTC AACCTCTGTTTCGGCAGAGGATA
CCGTGCTCCACAGCTGTAAGGCTGTGGGCCCGAGAGAAGTCGCTCTCTCTCGCCCTCTACATCCCTCT
+
FFFFFFFFFFFFFFFFFFFFFFFFFFFFFFFFFFFFFFFFFFFFFFFFFFFFFFFFFFFFFFFFFFFFFFFFF
FFFFFFFFFFFFFFFFFFFFFFFFFFFFFFFFFFFFFFFFFFFFFFFFFFFFFFFFFFFFFFFFFFFFFFFFF
@A00155:342:HHGFNDSXY:1:2560:30445:26349 2:N:0:GAACCTAG+TCCGCATA
AGCCCGGAGTACATCTCCTTTGGAAGTACTAGGAGACCCCTCCGGTCTTGTC AACCTCTGTTTCGGCAGA
GGATACCGTGCTCCACAGCTGTAAGGCTGTGGGCCCGAGAGAAGTCGCTCTCTCTCGCCCTCCACATC
+
FFFFFFFFFFFFFFFFFFFFFFFFFFFFFFFFFFFFFFFFFFFFFFFFFFFFFFFFFFFFFFFFFFFFFFFFF
FFFFFFFFFFFFFFFFFFFFFFFFFFFFFFFFFFFFFFFFFFFFFFFFFFFFFFFFFFFFFFFFFFFFFFFFF
@A00155:342:HHGFNDSXY:1:2560:8811:31062 2:N:0:GAACCTAG+TCCGCATA
AACAGCCCGGAGTACATCTCCTTTGGAACCAGGAGACCCCTCCGGTCTTGTC AACCTCTGTTTCGG
CAGAGGATACCGTGCTCCACAGCTGTAAGGCTGTGGGCCCGAGAGAAGTCGCTCTCTCTCGCC
+
FFFFFFFFFFFFFFFFFFFFFFFFFFFFFFFFFFFFFFFFFFFFFFFFFFFFFFFFFFFFFFFFFFFFFFFFF
FFFFFFFFFFFFFFFFFFFFFFFFFFFFFFFFFFFFFFFFFFFFFFFFFFFFFFFFFFFFFFFFFFFFFFFFF
@A00155:342:HHGFNDSXY:1:2560:19741:32487 2:N:0:GAACCTAG+TCCGCATA
ACATCTCCTTTGGAAGTACTAGGAGACCCCTCCGGTCTTGTC AACCTCTGTTTCGGCAGAGGATACCGTG
CTCCACAGCTGTAAGGCTGTGGGCCCGAGAGAAGTCGCTCTCTCTCGCCCTCCACATCCCTCTCGGCA
+
FFFFFFFFFFFFFFFFFFFFFFFFFFFFFFFFFFFFFFFFFFFFFFFFFFFFFFFFFFFFFFFFFFFFFFFFF
FFFFFFFFFFFFFFFFFFFFFFFFFFFFFFFFFFFFFFFFFFFFFFFFFFFFFFFFFFFFFFFFFFFFFFFFF
@A00155:342:HHGFNDSXY:1:2560:20654:33599 2:N:0:GAACCTAG+TCCGCATA
ACATCTCCTTTGGAAGTACTAGGAGACCCCTCCGGTCTTGTC AACCTCTGTTTCGGCAGAGGATACCGTG
CTCCACAGCTGTAAGGCTGTGGGCCCGAGAGAAGTCGCTCTCTCTCGCCCTCCACATCCCTCTCGGCA
+
FFFFFFFFFFFFFFFFFFFFFFFFFFFFFFFFFFFFFFFFFFFFFFFFFFFFFFFFFFFFFFFFFFFFFFFFF
FFFFFFFFFFFFFFFFFFFFFFFFFFFFFFFFFFFFFFFFFFFFFFFFFFFFFFFFFFFFFFFFFFFFFFFFF
@A00155:342:HHGFNDSXY:1:2561:4182:7983 2:N:0:GAACCTAG+TCCGCATA
ACTCTTCGAGTTGTGTAAGTTTCGTCCTAAAAAGGACTCGTCAGGTAGCCTACTAGACTACGACTTAC
ACGGTAGGTCGTGAACAAGCCCCGAGTACATCTCCTTTGGAAGTACTAGGAGACCCCTCCGGTCTTGTC
+
FFFFFFFFFFFFFFFFFFFFFFFFFFFFFFFFFFFFFFFFFFFFFFFFFFFFFFFFFFFFFFFFFFFFFFFFF
FFFFFFFFFFFFFFFFFFFFFFFFFFFFFFFFFFFFFFFFFFFFFFFFFFFFFFFFFFFFFFFFFFFFFFFFF
@A00155:342:HHGFNDSXY:1:2562:27570:9972 2:N:0:GAACCTAG+TCCGCATA
AGGACGAAACCGTCGTTACTCTTCGAGTTGTGTAAGTTTCGTCCTAAAAAGGACTCGTCAGGTAGCCT
ACTAGACTACGACTTACACGGTAGGTCGTGAACAAGCCCCGAGTACATCTCCTTTGGAAGTACTAGGAGAC
+

```

FFFFFFFFFFFFFFFFFFFFFFFFFFFFFFFFFFFFFFFFFFFFFFFFFFFFFFFFFFFFFFFFFFFFFFFF  
FFFFFFFFFFFFFFFFFFFFFFFFFFFFFFFFFFFFFFFFFFFFFFFFFFFFFFFFFFFFFFFFFFFFFFFF  
@A00155:342:HHGFNDSXY:1:2562:27805:16297 2:N:0:GAACCTAG+TCCGCATA  
AGGACGAAACCGTCGTTACTCTTCGAGTTGTGTAAGTTTCGTCCTAAAAAGGACTCGTCAGGTAGCCT  
ACTAGACTACGACTTACACGGTAGGTCGTGAACAAGCCCGGAGTACATCTCCTTTGGAAGTAGGAGAC  
+  
FFFFFFFFFFFFFFFFFFFFFFFFFFFFFFFFFFFFFFFFFFFFFFFFFFFFFFFFFFFFFFFFFFFFFFFF  
FFFFFFFFFFFFFFFFFFFFFFFFFFFFFFFFFFFFFFFFFFFFFFFFFFFFFFFFFFFFFFFFFFFFFFFF  
@A00155:342:HHGFNDSXY:1:2562:23176:21997 2:N:0:GAACCTAG+TCCGCATA  
GGACTCGTCAGGTAGCCTACTAGACTACGACTTACACGGTAGGTCGTGAACAAGCCCGGAGTACATCT  
CCATTGGAAGTAGGAGACCCCTCCGGTCTTGTCCAACCTCTGTTTCGGCAGAGGATACCGTGCTCCAC  
+  
FFFFFFFFFFFFFFFFFFFFFFFFFFFFFFFFFFFFFFFFFFFFFFFFFFFFFFFFFFFFFFFFFFFFFFFF  
FFFFFFFFFFFFFFFFFFFFFFFFFFFFFFFFFFFFFFFFFFFFFFFFFFFFFFFFFFFFFFFFFFFFFFFF  
@A00155:342:HHGFNDSXY:1:2562:28736:31313 2:N:0:GAACCTAG+TCCGCATA  
TCTTCGAGTTGTGTAAGTTTCGTCCTAAAAAGGACTCGTCAGGTAGCCTACTAGACTACGACTTACAC  
GGTAGGTCGTGAACAAGCCCGGAGTACATCTCCTTTGGAAGTAGGAGACCCCTCCGGTCTTGTCCAAC  
+  
FFFFFFFFFFFFFFFFFFFFFFFFFFFFFFFFFFFFFFFFFFFFFFFFFFFFFFFFFFFFFFFFFFFFFFFF  
FFFFFFFFFFFFFFFFFFFFFFFFFFFFFFFFFFFFFFFFFFFFFFFFFFFFFFFFFFFFFFFFFFFFFFFF  
@A00155:342:HHGFNDSXY:1:2562:17363:31876 2:N:0:GAACCTAG+TCCGCATA  
AGGACGAAACCGTCGTTACTCTTGGAGTTGTGTAAGTTTCGTCCTAAAAAGGACTCGTCAGGTAGCCT  
ACTAGACTACGACTTACACGGTAGGTCGTGAACAAGCCCGGAGTACATCTCCTTTGGAAGTAGGAGAC  
+  
FFFFFFFFFFFFFFFFFFFFFFFFFFFFFFFFFFFFFFFFFFFFFFFFFFFFFFFFFFFFFFFFFFFFFFFF  
FFFFFFFFFFFFFFFFFFFFFFFFFFFFFFFFFFFFFFFFFFFFFFFFFFFFFFFFFFFFFFFFFFFFFFFF  
@A00155:342:HHGFNDSXY:1:2563:8956:10770 2:N:0:GAACCTAG+TCCGCATA  
ACTTACACGGTAGGTCGTGAACAAGCCCGGAGTACATCTCCTTTGGAACCAGGAGACCCCTCCGGTCT  
TGTCCAACCTCTGTTTCGGCAGAGGATACCGTGCTCCACAGCTGTAAGGCTGTGGGCCCGAGAGAAGT  
+  
FFFFFFFFFFFFFFFFFFFFFFFFFFFFFFFFFFFFFFFFFFFFFFFFFFFFFFFFFFFFFFFFFFFFFFFF  
FFFFFFFFFFFFFFFFFFFFFFFFFFFFFFFFFFFFFFFFFFFFFFFFFFFFFFFFFFFFFFFFFFFFFFFF  
@A00155:342:HHGFNDSXY:1:2563:26033:14418 2:N:0:GAACCTAG+TCCGCATA  
CGAGTTGTGTAAGTTTCGTCCTAAAAAGGACTCGTCAGGTAGCCTACTAGACTACGACTTACACGGTA  
GGTCGTGAACAAGCCCGGAGTACATCTCCTTTGGAACCAGGAGACCCCTCCGGTCTTGTCCAACCTCT  
+  
FFFFFFFFFFFFFFFFFFFFFFFFFFFFFFFFFFFFFFFFFFFFFFFFFFFFFFFFFFFFFFFFFFFFFFFF  
FFFFFFFFFFFFFFFFFFFFFFFFFFFFFFFFFFFFFFFFFFFFFFFFFFFFFFFFFFFFFFFFFFFFFFFF  
@A00155:342:HHGFNDSXY:1:2563:7627:26193 2:N:0:GAACCTAG+TCCGCATA  
AAGGACGAAACCGTCGTTACTCTTCGAGTTGTGTAAGTTTCGTCCTAAAAAGGACTCGTCAGGTAGCC  
TACTAGACTACGACTTACACGGTAGGTCGTGAACAAGCCCGGAGTACATCTCCTTTGGAAGTAGGAGA  
+  
FFFFFFFFFFFFFFFFFFFFFFFFFFFFFFFFFFFFFFFFFFFFFFFFFFFFFFFFFFFFFFFFFFFFFFFF  
FFFFFFFFFFFFFFFFFFFFFFFFFFFFFFFFFFFFFFFFFFFFFFFFFFFFFFFFFFFFFFFFFFFFFFFF  
@A00155:342:HHGFNDSXY:1:2563:5620:30608 2:N:0:GAACCTAG+TCCGCATA  
GGAGTACATCTCCTTTGGAACAAGGAGACCCCTCCGGTCTTGTCCAACCTCTGTTTCGGCAGAGGATA  
CCGTGCTCCACAGCTGTAAGGCTGTGGGCCCGAGAGAAGTCGCTCTCTCGCCCTCCACATCCC  
+  
FFFFFFFFFFFFFFFFFFFFFFFFFFFFFFFFFFFFFFFFFFFFFFFFFFFFFFFFFFFFFFFFFFFFFFFF  
FFFFFFFFFFFFFFFFFFFFFFFFFFFFFFFFFFFFFFFFFFFFFFFFFFFFFFFFFFFFFFFFFFFFFFFF  
@A00155:342:HHGFNDSXY:1:2564:10438:12336 2:N:0:GAACCTAG+TCCGCATA  
CTCCGGTCTTGTCCAACCTCTGTTTCGGCAGAGGATACCGTGCTCCACAGCTGTAAGGCTGTGGGCC  
GAGAGAAGTCGCTCTCTCTCGCCCTACACATCCCTCTCGGCATTGAGATGAC  
+

[illegible]



[illegible]

@A00155:342:HHGFNDSXY:1:2570:18954:9580 2:N:0:GAACCTAG+TCCGCATA  
ACACGGTAGGTCGTGAACAAGCCCGAGTACATCTCCTTTGGAAGTACTAGGAGACCCCTCCGGTCTTGCT  
CAACCTCTGTTTTCGGCAGAGGATACCGTGCTCCACAGCTGTAAGGCTGTGGGCCCGAGAGAAGTCGCT  
+  
FFFFFFFFFFFFFFFFFFFFFFFFFFFFFFFFFFFFFFFFFFFFFFFFFFFFFFFFFFFFFFFFFFFFFFFFFFFFFFFFFFFFF  
FFFFFFFFFFFFFFFFFFFFFFFFFFFFFFFFFFFFFFFFFFFFFFFFFFFFFFFFFFFFFFFFFFFFFFFFFFFFFFFFFFFFF  
@A00155:342:HHGFNDSXY:1:2570:22779:17675 2:N:0:GAACCTAG+TCCGCATA  
GGTCGTGAACAAGCCCGAGTACATCTCCTTTGGAAGTACTAGGAGACCCCTCCGGTCTTGCCAACCTCT  
GTTTCGGCAGAGGATACCGTGCTCCACAGCTGTAAGGCTGTGGGCCCGAGAGAAGTCGCTCTCTCTCG  
+  
FFFFFFFFFFFFFFFFFFFFFFFFFFFFFFFFFFFFFFFFFFFFFFFFFFFFFFFFFFFFFFFFFFFFFFFFFFFFFFFFFFFFF  
FFFFFFFFFFFFFFFFFFFFFFFFFFFFFFFFFFFFFFFFFFFFFFFFFFFFFFFFFFFFFFFFFFFFFFFFFFFFFFFFFFFFF  
@A00155:342:HHGFNDSXY:1:2570:24297:30389 2:N:0:GAACCTAG+TCCGCATA  
GAAACCGTCGTTACTCTTCGAGTTGTGTAAGTTTCGTCCTAAAAAGGACTCGTCAGGTAGCCTACTAG  
ACTACGACTTACACGGTAGGTCGTGAACAAGCCCGAGTACATCTCCTTTGGAAGTACTAGGAGACCCCTC  
+  
FFFFFFF:FFFFFFFFFFFFFFFFFFFFFFFFFFFFFFFFFFFFFFFFFFFFFFFFFFFFFFFFFFFFFFFFFFFFFFFFF:F  
FFFFFFFFFFFFFFFFFFFFFFFFFFFFFFFFFFFFFFFFFFFFFFFFFFFFFFFFFFFFFFFFFFFFFFFFFFFFFFFFFFFFF  
@A00155:342:HHGFNDSXY:1:2570:32362:34741 2:N:0:GAACCTAG+TCCGCATA  
CACGGTAGGTCGTGAACAAGCCCGAGTACATCTCCTTTGGAAGTACTAGGAGACCCCTCCGGTCTTGTC  
AACCTCTGTTTCGGCAGAGGATACCGTGCTCCACAGCTGTAAGGCTGTGGGCCCGAGAGAAGTCGCTC  
+  
FFFFFFF:FFFFFFFFFFFFFFFFFFFFFFFFFFFFFFFFFFFFFFFFFFFFFFFFFFFFFFFFFFFFFFFFFFFFFFFFF:  
FFFFFFFFFFFFFFFFFFFFFFFFFFFFFFFFFFFFFFFFFFFFFFFFFFFFFFFFFFFFFFFFFFFFFFFFFFFFFFFFFFFFF  
@A00155:342:HHGFNDSXY:1:2571:26377:1955 2:N:0:GAACCTAG+TCCGCATA  
CATGGGGGTTCAAACCCATGCCCGCCACACCGCCTTAGATCAGCTGTGTCCACTTAAGGACTCACCT  
CTGGCCTATGGTCATCTCAATGCCGAGAGGGAGGTGGAGGGCGAGAGAGAGCGACTTCTCTCGG  
+  
FFFFFFFFFFFFFFF:FFFFFFFFFFFFFFFFFFFFFFFFFFFFFFFFFFFFFFFFFFFFFFFFFFFFFFFFFFFFFFFFFFFFF  
FFFFFFFFFFFFFFFFFFFFFFFFFFFFFFFFFFFFFFFFFFFFFFFFFFFFFFFFFFFFFFFFFFFFFFFFFFFFFFFFFFFFF  
@A00155:342:HHGFNDSXY:1:2571:8802:10535 2:N:0:GAACCTAG+TCCGCATA  
CGGTAGGTCGTGAACAAGCCCGAGTACATCTCCTTTGGAAGTACTAGGAGACCCCTCCGGTCTTGTC  
CCTCTGTTTCGGCAGAGGATACCGTGCTCCACAGCTGTAAGGCTGTGGGCCCGAGAGAAGTCGCTCTC  
+  
FFFFFFFFFFFFFFFFFFFFFFFFFFFFFFFFFFFFFFFFFFFFFFFFFFFFFFFFFFFFFFFFFFFFFFFFFFFFFFFFFFFFF  
FFFFFFFFFFFFFFFFFFFFFFFFFFFFFFFFFFFFFFFFFFFFFFFFFFFFFFFFFFFFFFFFFFFFFFFFFFFFFFFFFFFFF  
@A00155:342:HHGFNDSXY:1:2571:21088:17691 2:N:0:GAACCTAG+TCCGCATA  
GACCCCTCCGGTCTTGTCACCTCTGTTTCGGCAGAGGATACCGTGCTCCACAGCTGTAAGGCTGTG  
GGCCCCGAGAGAAGTCGCTCTCTCTCGCCCTCTACATCCCTCTCGGCATTGAGATGACCATAGGC  
+  
FFFFFFFFFFFFFFFFFFFFFFFFFFFFFFFFFFFFFFFFFFFFFFFFFFFFFFFFFFFFFFFFFFFFFFFFFFFFFFFFFFFFF  
FFFFFFFFFFFFFFFFFFFFFFFFFFFFFFFFFFFFFFFFFFFFFFFFFFFFFFFFFFFFFFFFFFFFFFFFFFFFFFFFFFFFF  
@A00155:342:HHGFNDSXY:1:2571:29324:27633 2:N:0:GAACCTAG+TCCGCATA  
ATCAGCTGTGTCCACTTAAGGACTCACCTCTGGCCTATGGTCATCTCAATGCCGAGAGGGATGTAGAG  
GGCAGAGAGAGCGACTTCTCTCGGGCCCACAGCCTTACAGCTGTGGAGCACGGTATCCTCTGCCGAA  
+  
FFFFFFFFFFFFFFFFFFFFFFFFFFFFFFFFFFFFFFFFFFFFFFFFFFFFFFFFFFFFFFFFFFFFFFFFFFFFFFFFFFFFF  
FFFFFFFFFFFFFFFFFFFFFFFFFFFFFFFFFFFFFFFFFFFFFFFFFFFFFFFFFFFFFFFFFFFFFFFFFFFFFFFFFFFFF  
@A00155:342:HHGFNDSXY:1:2571:22806:32816 2:N:0:GAACCTAG+TCCGCATA  
GCCTACTAGACTACGACTTACACGGTAGGTCGTGAACAAGCCCGAGTACATCTCCTTTGGAAGTACTAG  
AGACCCCTCCGGTCTTGTCACCTCTGTTTCGGCAGAGGATACCGTGCTCCACAGCTGTAAGGCTGT

[illegible]

@A00155:342:HHGFNDSXY:1:2575:31539:21418 2:N:0:GAACCTAG+TCCGCATA  
ACTTACACGGTAGGTTCGTGAACAAGCCCGGAGTACATCTCCTTTGGAACCAGGAGACCCCTCCGGTCT  
TGTTCCAACCTCTGTTTTCGGCAGAGGATACCGTGCTCCACAGCTGTAAGGCTGTGGGCCCGAGAGAAGT  
+  
FFFFFFFFFFFFFFFFFFFFFFFFFFFFFFFFFFFFFFFFFFFFFFFFFFFFFFFFFFFFFFFFFFFFFFFFFFFFF:  
FF:FFFFFFFFFFFFFF:FFFFFFFFFFFFFF:FFFFFFFFFFFFFFFFFFFFFFFF:FFFF:FFFFFFFFFFFFFF,F:  
@A00155:342:HHGFNDSXY:1:2575:15176:31407 2:N:0:GAACCTAG+TCCGCATA  
ACGGTAGGTTCGTGAACAAGCCCGGAGTACATCTCCTTTGGAACCAGGAGACCCCTCCGGTCTTGTTCCA  
ACCTCTGTTTCGGCAGAGGATACCGTGCTCCACAGCTGTAAGGCTGTGGGCCCGAGAGAAGTTCGCTCT  
+  
FFFFFFFFFFFFFFFFFFFFFFFFFFFFFFFFFFFFFFFFFFFFFFFFFFFFFFFFFFFFFFFFFFFFFFFFFFFFF  
FFFFFFFFFFFFFFFFFFFFFFFFFFFFFFFFFFFFFFFFFFFFFFFFFFFFFFFFFFFFFFFFFFFFFFFFFFFFF  
@A00155:342:HHGFNDSXY:1:2575:28085:35916 2:N:0:GAACCTAG+TCCGCATA  
CGGCAGAGGATACCGTGCTCCACAGCTGTAAGGCTGTGGGCCCGAGAGAAGTCGCTCTCTCTCGCCCT  
CCACATCCCTCTCGGCATTGAGATGACCATAGGCCAGAGGTGAGTCCTTAAGTGACACAGCTGATCT  
+  
FFFFFFFFFFFFFFFFFFFFFFFFFFFFFFFFFFFFFFFFFFFFFFFFFFFFFFFFFFFFFFFFFFFFFFFFFFFFF  
FFFFFFFFFFFFFFFFFFFFFFFFFFFFFFFFFFFFFFFFFFFFFFFFFFFFFFFFFFFFFFFFFFFFFFFFFFFFF,  
@A00155:342:HHGFNDSXY:1:2576:23176:27790 2:N:0:GAACCTAG+TCCGCATA  
TCTCCTTTGGAAGTACGAGACCCCTCCGGTCTTGTTCCAACCTCTGTTTCGGCAGAGGATACCGTGCTC  
CACAGCTGTAAGGCTGTGGGCCCGAGAGAAGTCGCTCTCTCTCGCCCTCCACATCCCTCTCGGCATTG  
+  
FFFFFFFFFFFFFFFFFFFFFFFFFFFFFFFFFFFFFFFFFFFFFFFFFFFFFFFFFFFFFFFFFFFFFFFFFFFFF  
FFFFFFFFFFFFFFFFFFFFFFFFFFFFFFFFFFFFFFFFFFFFFFFFFFFFFFFFFFFFFFFFFFFFFFFFFFFFF  
@A00155:342:HHGFNDSXY:1:2577:15031:6981 2:N:0:GAACCTAG+TCCGCATA  
GGACTCGTCAGGTAGCCTACTAGACTACGACTTACACGGTAGGTTCGTGAACAAGCCCGGAGTACATCT  
CCTTTGGAAGTACGAGACCCCTCCGGTCTTGTTCCAACCTCTGTTTCGGCAGAGGATACCGTGCTCCAC  
+  
FFFFFFFFFFFFFFFFFFFFFFFFFFFFFFFFFFFFFFFFFFFFFFFFFFFFFFFFFFFFFFFFFFFFFFFFFFFFF  
FFFFFFFFFFFFFFFFFFFFFFFFFFFFFFFFFFFFFFFFFFFFFFFFFFFFFFFFFFFFFFFFFFFFFFFFFFFFF  
@A00155:342:HHGFNDSXY:1:2578:16188:7326 2:N:0:GAACCTAG+TCCGCATA  
TCTCCTTTGGAAGTACGAGACCCCTCCGGTCTTGTTCCAACCTCTGTTTCGGCAGAGGATACCGTGCTC  
CACAGCTGTAAGGCTGTGGGCCCGAGAGAAGTCGCTCTCTCTCGCCCTCCACATCCCTCTCGGCATTG  
+  
FFFFFFFFFFFFFFFFFFFFFFFFFFFFFFFFFFFFFFFFFFFFFFFFFFFFFFFFFFFFFFFFFFFFFFFFFFFFF  
FFFFFFFFFFFFFFFFFFFFFFFFFFFFFFFFFFFFFFFFFFFFFFFFFFFFFFFFFFFFFFFFFFFFFFFFFFFFF  
@A00155:342:HHGFNDSXY:1:2578:32127:14074 2:N:0:GAACCTAG+TCCGCATA  
TACTCTTCGAGTTGTGTAAGTTTCGTCCTAAAAGGACTCGTCAGGTAGCCTACTAGACTACGACTTA  
CACGGTAGGTTCGTGAACAAGCCCGGAGTACATCTCCTTTGGAAGTACGAGACCCCTCCGGTCTTGTTCC  
+  
FFFFFFFFFFFFFFFFFFFFFFFFFFFFFFFFFFFFFFFFFFFFFFFFFFFFFFFFFFFFFFFFFFFFFFFFFFFFF  
FFFFF.:FFFFFFFFFFFFFF,FFFFFFFFFFFFFFFFFFFFFFFFFFFFFFFFFFFFFFFFFFFFFFFFFFFFF:FFFFF  
@A00155:342:HHGFNDSXY:1:2578:2139:25394 2:N:0:GAACCTAG+TCCGCATA  
TTACTCTTCGAGTTGTGTAAGTTTCGTCCTAAAAGGACTCGTCAGGTAGCCTACTAGACTACGACTT  
ACACGGTAGGTTCGTGAACAAGCCCGGAGTACATCTCCTTTGGAAGTACGAGACCCCTCCGGTCTTGTC  
+  
FFFFFFFFFFFFFFFFFFFFFFFFFFFFFFFFFFFFFFFFFFFFFFFFFFFFFFFFFFFFFFFFFFFFFFFFFFFFF  
F,FF:FFF:FFFF:FFFF:F,FFFFFFFFFFFFFFFFFFFF,FFFFFFFFFFFFFFFFFFFFFFFFFFFFFFFFF  
@A00155:342:HHGFNDSXY:1:2578:4092:35415 2:N:0:GAACCTAG+TCCGCATA  
ACTTACACGGTAGGTTCGTGAACAAGCCCGGAGTACATCTCCTTTGGAAGTACGAGACCCCTCCGGTCT  
TGTTCCAACCTCTGTTTCGGCAGAGGATACCGTGCTCCACAGCTGTAAGGCTGTGGGCCCGAGAGAAGT  
+  
FFFFFFFFF,FFFFF,FFFFFFFFFFFFFFFFFFFFFFFFFFFFFFFFFFFFFFFFFFFFFFFFFFFFFFFFFFFFF  
FFFFFFFFFFFFFFFFFFFFFFFFFFFFFFFFFFFFFFFFFFFFFFFFFFFFFFFFFFFFFFFFFFFFFFFFFFFFF  
@A00155:342:HHGFNDSXY:1:2578:4092:35415 2:N:0:GAACCTAG+TCCGCATA  
ACTTACACGGTAGGTTCGTGAACAAGCCCGGAGTACATCTCCTTTGGAAGTACGAGACCCCTCCGGTCT  
TGTTCCAACCTCTGTTTCGGCAGAGGATACCGTGCTCCACAGCTGTAAGGCTGTGGGCCCGAGAGAAGT  
+

@A00155:342:HHGFNDSXY:1:2578:14299:36338 2:N:0:GAACCTAG+TCCGCATA  
GAAACCGTCGTACTCTTGAGATTGTGTAAGTTTCGTCCTAAAAAGGACTCGTCAGGTAGCCTACTAG  
ACTACGACTTACACGGTAGGTCGTGAACAAGCCCCGGAGTACATCTCCTTTGGAAGTACTAGGAGACCCCTC  
+  
FFFFFFFFFFFFFFF:FFFFFFFFFFFFFFF,FFFFFFFF:FFFFFFFF:FFFFFFFF:FFF:FF:FF  
FFFFFFFFFFFFFFF:FFFFFFFFFFFFFFF:F,FFFFFFFFFFFFFFF:FFFFFFFFFFFFFFF:F  
@A00155:342:HHGFNDSXY:1:2601:16776:21903 2:N:0:GAACCTAG+TCCGCATA  
CTCTTTGAGTTGTGTAAGTTTCGTCCTAAAAAGGACTCGTCAGGTAGCCTACTAGACTACGACTTACA  
CGGTAGGTCGTGAACAAGCCCCGGAGTACATCTCCTTTGGAAGTACTAGGAGACCCCTCCGGTCTTGTC  
+  
F,FFF:FFFFFFFFFFFFFFF:FFFFFFFFFFFFFFF:FFFFFFFFFFFFFFF:FFFF  
FFFFFFFFFFFFFFF:FFFFFFFFFFFFFFF:FFFFFFFFFFFFFFF:FFFFFFFFFFFFFFF:  
@A00155:342:HHGFNDSXY:1:2601:14064:31046 2:N:0:GAACCTAG+TCCGCATA  
GGAGTACATCTCCTTTGGAAGTACTAGGAGACCCCTCCGGTCTTGTC AACCTCTGTTTCGGCAGAGGATA  
CCGTGCTCCACAGCTGTAAGGCTGTGGGCCCGAGAGAAGTCGCTCTCTCTCGCCCTCCACATCCCTCT  
+  
FFFFFFFFFFFFFFFFFFFFFFFFFFFFFFFFFFFFFFFFFFFFFFFFFFFFFFFFFFFFFFFF  
FFFFFFFFFFFFFFFFFFFFFFFFFFFFFFFFFFFFFFFFFFFFFFFFFFFFFFFFFFFFFFFF  
@A00155:342:HHGFNDSXY:1:2602:10655:10144 2:N:0:GAACCTAG+TCCGCATA  
AAGCCCGGAGTACATCTCCTTTGGAACCAGGAGACCCCTCCGGTCTTGTC AACCTCTGTTTCGGCAG  
AGGATACCGTGCTCCACAGCTGTAAGGCTGTGGGCCCGAGAGAAGTCGCTCTCTCTCGCCCTCCACAT  
+  
FFFFFFFFFFFFFFFFFFFFFFF,FFFFFF:FFFFFFFFFFFFFFFFFFFFFFFFFFFFFFFFFFFFFFFF:FFFF,F  
FF,F::FFFF,FFFFFF:FF,FF:FF,FFFF:FFFF:FFFFFFFFFFFFFFFFFFFFFFFF:FFFFFFFF  
@A00155:342:HHGFNDSXY:1:2602:29884:15264 2:N:0:GAACCTAG+TCCGCATA  
GGAAGTACATCTCCTTTGGAAGTACTAGGAGACCCCTCCGGTCTTGTC AACCTCTGTTTCGGCAGAGGATA  
CCGTGCTCCACAGCTGTAAGGCTGTGGGCCCGAGAGAAGTCGCTCTCTCTCGCCCTCCACAT  
+  
FFFFFFFFFFFFFFFFFFFFFFF:FFFFFFFFFFFFFFFFFFFFFFFFFFFFFFFFFFFFFFFF,FFFFFF:FFF:FFF  
FFFFFFFFFFFFFFFFFFFFFFF,:FFFFFFFFF:F:FFFFFFFFFFFFFFFFFFFFFFFF:FFFFFFFFFFFFFFFF  
@A00155:342:HHGFNDSXY:1:2602:2862:16157 2:N:0:GAACCTAG+TCCGCATA  
GAAACCGTCGTACTCTTCGAGTTGTGTAAGTTTCGTCCTAAAAAGGACTCGTCAGGTAGCCTACTAG  
ACTACGACTTACACGGTAGGTCGTGAACAAGCCCCGGAGTACATCTACTTTGGAAGTACTAGGAGACCCCTC  
+  
FFFFFFFFFFFFFFFFFFFFFFF,F::FFFFFFFFFFFFFFF::FF:F:F::FFFFFFFF,FFFFFF:FFF,FF  
FFFFFFFFFFFFFFF:FF:FFF,FFFF::FFFFFF,F,F:FFF:F:FFFF,FFFF,FFF::F,FFFF,:FFF  
@A00155:342:HHGFNDSXY:1:2603:15700:2127 2:N:0:GAACCTAG+TCCGCATA  
GTTTCGTCCTAAAAAGGACTCGTCAGGTAGCCTACTAGACTACGACTTACACGGTAGGTCGTGAACA  
GCCCCGGAGTACATCTCCTTTGGAAGTACTAGGAGACCCCTCCGGTCTTGTC AACCTCTGTTTCGGCAGAG  
+  
FFFFFFFFFFFFFFFFF:FFFFFF:FFFFFFFFFFFFFFFFFFFFFFFFFFFFFFFFFFFFFFFFFFFFFFFF  
FFFFFFFFFFFFFFFFFFFFFFFFFFFFFFFFFFFFFFFFFFFFFFFFFFFFFFFFFFFFFFFF,:FFFFFFFFFFFFFFFF  
@A00155:342:HHGFNDSXY:1:2603:8169:8844 2:N:0:GAACCTAG+TCCGCATA  
AGGACGAAATCGTCGTTACTCTTCGAGTTGTGTAAGTTTCGTCCTAAAAAGGACTCGTCAGGTAGCCT  
ACTAGACTACGACTTACACGGTAGGTCGTGAACAAGCCCCGGAGTACATCTCCTTTGGAAGTACTAGGAGAC  
+  
FFFFFFFFFFFFFFFFFFFFFFFFFFFFFFFFFFFFFFFFFFFFFFFFFFFFFFFFFFFFFFFFFFFFFFFF  
FFFF::FFFFFFFFFFFFFFFFFFFFFFFFFFFFFFFF,FFFFFFFF:FFFFFFFFFFFFFFFF,FFFFFFFF  
@A00155:342:HHGFNDSXY:1:2603:15465:14967 2:N:0:GAACCTAG+TCCGCATA  
GACTTACACGGTAGGTCGTGAACAAGCCCCGGAGTACATCTCCTTTGGAAGTACTAGGAGACCCCTCCGGTC  
TTGTCCAACCTCTGTTTCGGCAGAGGATAACCGTGCTCCACAGCTGTAAGGCTGTGGGCCCGAGAGAAG  
+  
FFFFFFFFFFFFFFF:FF:FFFFFFFFFFFFFFFFFFFFFFFFFFFFFFFFFFFFFFFFFFFFFFFF  
F,FFFFFFFFFFFFFFFFFFFFFFFFFFFFFFFFFFFFFFFFFFFFFFFFFFFFFFFFFFFFFFFF,F,FFFFFFFF  
@A00155:342:HHGFNDSXY:1:2603:15465:14967 2:N:0:GAACCTAG+TCCGCATA

@A00155:342:HHGFNDSXY:1:2603:26033:27132 2:N:0:GAACCTAG+TCCGCATA  
TTAGGACGAACTTACACAACCTCGAAGAGTAACGACGGTTTCGTCTTGAACGGACTCATCAGGGAG  
CCTACTAGACTCCGACCGTCATGGGGGTTCAAACCCATGCCCGCTACACCGCCTTAGAT

[illegible]

GGACTCGTCAGGTAGCCTACTAGACTACGACTTACACGGTAGGTCGTGAACAAGCCCGGAGTACATCT  
CCTTTGGAAGTAGGAGACCCCTCCGGTCTTGTCCAACCTCTGTTTCGGCAGAGGATACCGTGCTCCAC

```

FFFFF,FFFFFF:FFFFFFFFFFFFFFFF:FFFFFFFF:FFFFFFFFFFFFFFFF:FFFF:FFFFFFFF
FFFFFFFFFFFFFFFF,FFFFFF:F,FFFF,F::FFFFFFFFFFFF,F,F:FFFF::F,FFFF:FFFFFF

```

CTCTGGCCTATGGTCATCTCAATGCCGAGAGGGATGTGGAGGGCGAGAGAGAGCGACTTCTCTCGGGC  
CCACAGCCTTACAGCTGTGGAGCACGGTATCCTCTGCCGAAACAGAGGTTGGACAAGACCG

```
F:FFFFFFFF,FFFFFFFFFFFFFFFFF::FFFFFFFF:FFFFFFFF:FFFFFFFFFFFFFFFFFFFF:FF
F:FFFFFF:F:FFFFFFFFFFFFFFFFFFFFFFFFFFFFFFFFFFFFFFFFFFFFFFFFFFFFFFFFFFFF
```

CACGGTAGGTCGTGAACAAGCCCGGAGTACATCTCCTTTGGAAGTAGGAGACCCCTCCGGTCTTGTCC  
 AACCTCTGTTTCGGCAGAGGATACCGTGCTCCACAGCTGTAAGGCTGTGGGCCCCGAGAGAAGTCGCTC

[illegible]

AACAAGCCCGGAGTACATCTCCTTTGGAACCAGGAGACCCCTCCGGTCTTGTCCAACCTCTGTTTCGG  
CAGAGGATACCGTGCTCCACAGCTGTAAGGCTGTGGGCCCGAGAGAAGTCGCTCTCTCTCGCCCTCCA

[illegible]

AACAAAGCCCGGAGTACATCTCCTTTGGAACCAGGAGACCCCTCCGGTCTTGTCCAACCTCTGTTTCGG  
 CAGAGGATACCGTGCTCCACAGCTGTAAGGCTGTGGGCCCAGAGAAGTCGCTCTCTCTCGCCCTCCA

```
FFFFF:FFFFFFFFFFFFFFFFFFFFFFFFFFFFFFFFFFFFFFFF:FFFFFFFFFFFFFFFF
FFFFFFFFFFFFFFFF:FFFFFFFFFFFFFFFFFFFFFFFFFFFFFFFFFFFFFFFF:FFFFFFF
```

GACTCGTCAGGTAGCCTACTAGACTACGACTTACACGGTAGGTCGTGAACAAGCCCGGAGTACATCTC  
CTTTGGAAGTAGGAGACCCCTCCGGTCTTGTCCAACCTCTGTTTCGGCAGAGGATACCGTGCTCCAC

```
:FFF::FFFFFFFF:FFFF,FF:FF:FF,FFF,FFFFFF:FF::FFFFFFFFFFFF:F:FFF:FF:FFFFF
:FF:FFF:FFFFFFFFFFFFFF:F,F,:FFFF:FF,FFFF,FFFFFFFF,,FFFFFFFFFF:FF,FF:FFFF
```

GGACTCGTCAGGTAGCCTACTAGACTACGACTTACACGGTAGGTCGTGAACAAGCCCGGAGTACATCT  
CCTTTGGAAGTAGGAGACCCCTCCGGTCTTGTCCAACCTCTGTTTCGGCAGAGGATACCGTGCTCCAC

[illegible]

GGACTCGTCAGGTAGCCTACTAGACTACGACTTACACGGTAGGTCGTGAACAAGCCCGGAGTACATCT  
CCTTTGGAAGTAGGAGACCCCTCCGGTCTTGTCCAACCTCTGTTTCGGCAGAGGATACCGTGCTCCAC

```
FFFFFFFFFFFFFFFFFFFFFFFFFFFFF:FFFFFFFFFFFFFFFFFFFFFFFFFFFFFFF
FFFFFFFFFFFFFFFFFFFFFFFFFFFFF,FFFFFFFFFFFFFFFFFFFFFFFFFFFFFFF:FFFFFFFFFFFF
```

@A00155:342:HHGFNDSXY:1:2604:29405:33912 2:N:0:GAACCTAG+TCCGCATA  
TTGTCCAACCTCTGTTTCGGCAGAGGATACCGTGCTCCACAGCTGTAAGGCTGTGGGCCCGAGAGAAG  
TCGCTCTCTCTCGCCCTTCACATCCCTCTCGGCATTGAGATGACCATAGGCCAGAGGTGAGTCCTTAA  
+  
:FFFFFFFFFFFFFFFFFFFFFFFFFFFFFFFFFFFFFFFFFFFFFFFFFFFFFFFFFFFFFFFFFFFFF:FFFFFFFFFFFFFFFFFFFF  
:F:FFFFFFFFFFFFFFFFFFFFFFFFFFFFFFFFFFFFFFFFFFFFFFFFFFFFFFFFFFFFFFFFFFFF,FFFF:F  
@A00155:342:HHGFNDSXY:1:2604:26729:35603 2:N:0:GAACCTAG+TCCGCATA  
ACTCTTCGAGTTGTGTAAGTTTCGTCTCTAAAAAGGACTCGTCAGGTAGCCTACTAGACTACGACTTAC  
ACGGTAGGTCGTGAACAAGCCCCGAGTACATCTCCTTTGGAAGTACTAGGAGACCCCTCCGGTCTTGTCCA  
+  
FFFFFFFFFFFFFFFFFFFFFFFFFFFFFFFFFFFFFFFFFFFFFFFFFFFFFFFFFFFFFFFFFFFFFFFFF  
FFFFFFFFFFFFFFFFFFFFFFFFFFFFFFFFFFFFFFFFFFFFFFFFFFFFFFFFFFFFFFFFFFFFFFFFF  
@A00155:342:HHGFNDSXY:1:2605:21739:15906 2:N:0:GAACCTAG+TCCGCATA  
CGTTACTCTTAGAGTTGTGTAAGTTTCGTCTCTAAAAAGGACTCGTCAGGTAGCCTACTAGACTACGAC  
TTACACGGTAGGTCGTGAACAAGCCCCGAGTACATCTCCTTTGGAAGTACTAGGAGACCCCTCCGGTCTTG  
+  
FFFFFFFF:FFFFFFFFFFFFFFFFFFFFFFFFFFFFFFFFFFFFFFFFFFFFFFFFFFFFFFFFFFFFFFFFF  
FFFFFFFFFFFFFFFFFFFFFFFFFFFFFFFFFFFFFFFFFFFFFFFFFFFFFFFFFFFFFFFFFFFFFFFFF  
@A00155:342:HHGFNDSXY:1:2605:18954:24298 2:N:0:GAACCTAG+TCCGCATA  
GGAGTACATCTCCTTTGGAAGTACTAGGAGACCCCTCCGGTCTTGTCCAACCTCTGTTTCGGCAGAGGATA  
CCGTGCTCCACAGCTGTAAGGCTGTGGGCCCGAGAGAAGTCGCTCTCTCTCGCCCTCCAC  
+  
FFFFFFFFFFFFFFFFFFFFFFFFFFFFFFFFFFFFFFFFFFFFFFFFFFFFFFFFFFFFFFFFFFFFFFFFF  
FFFFFFFFFFFFFFFFFFFFFFFFFFFFFFFFFFFFFFFFFFFFFFFFFFFFFFFFFFFFFFFFFFFFFFFFF  
@A00155:342:HHGFNDSXY:1:2606:27281:2237 2:N:0:GAACCTAG+TCCGCATA  
GGAGTACATCTCCTTTGGAAGTACTAGGAGACCCCTCCGATCTTGTCCAACCTCTGTTTCGGCAGAGGATA  
CCGTGCTCCACAGCTGTAAGGCTGTGGGCCCGAGAGAAGTCGCTCTCTCTCGCCCTCCACATCCCTCT  
+  
FFFFFFFFFFFFFFFFFFFFFFFFFFFFFFFFFFFFFFFFFFFFFFFFFFFFFFFFFFFFFFFFFFFFFFFFF  
FFFFFFFFFFFFFFFFFFFFFFFFFFFFFFFFFFFFFFFFFFFFFFFFFFFFFFFFFFFFFFFFFFFFFFFFF  
@A00155:342:HHGFNDSXY:1:2606:31412:11678 2:N:0:GAACCTAG+TCCGCATA  
TACGACTTACACGGTAGGTCGTGAACAAGCCCCGAGTACATCTCCTTTGGAAGTACTAGGAGACCCCTCCG  
GTCTTGTCCAACCTCTGTTTCGGCAGAGGATACCGTGCTCCACAGCTGTAAGGCTGTGGGCCCG  
+  
FFFFFFFFFFFFFFFFFFFFFFFFFFFFFFFFFFFFFFFFFFFFFFFFFFFFFFFFFFFFFFFFFFFFFFFFF  
FFFFFFFFFFFFFFFFFFFFFFFFFFFFFFFFFFFFFFFFFFFFFFFFFFFFFFFFFFFFFFFFFFFFFFFFF  
@A00155:342:HHGFNDSXY:1:2606:2492:18552 2:N:0:GAACCTAG+TCCGCATA  
GACCCCTCCGGTCTTGTCCAACCTCTGTTTCGGCAGAGGATACCGTGCTCCACAGCTGTAAGGCTGTG  
GGCCCCGAGAGAAGTCGCTCTCTCTCGCCCTCCACATCCCTCTCGGCATTGAGATGACCATAGGC  
+  
FFFFFFFFFFFFFFFFFFFFFFFFFFFFFFFFFFFFFFFFFFFFFFFFFFFFFFFFFFFFFFFFFFFFFFFFF  
FFF:FFFFFFFF:FFF:FFFFFFFF:FFFF:FFFFFFFFFFFFFFFFFFFFFFFFFFFFFFFFFFFFFFF  
@A00155:342:HHGFNDSXY:1:2606:30924:27524 2:N:0:GAACCTAG+TCCGCATA  
ACATCTCCTTTGGAAGTACTAGGAGACCCCTCCGGTCTTGTCCAACCTCTGTTTCGGCAGAGGATACCGTG  
CTCCACAGCTGTAAGGCTGTGGGCCCGAGAGAAGTCGCTCTCTCTCGCCCTCTACATCCCTCTCGGCA  
+  
FFF:FFFFFFFF,FFFFFFFFFFFFFFFFFFFFFFFFFFFFFFFFFFFFFFFFFFFFFFFFFFFFFFFFF  
FFFFFFFFFF:FF,:FFFFFFFFFFFFFFFFFFFFFFFFFFFFFFFFFFFFFFFFFFFFFFFFFFFFFFFFF  
@A00155:342:HHGFNDSXY:1:2607:27715:8813 2:N:0:GAACCTAG+TCCGCATA  
GGACTCGTCAGGTAGCCTACTAGACTACGACTTACACGGTAGGTCGTGAACAAGCCCCGAGTACATCT  
CCTTTGGAACCAGGAGACCCCTCCGGTCTTGTCCAACCTCTGTTTCGGCAGAGGATACCGTGCTCCAC  
+  
FFFFFFFFFFFFFFFFFFFFFFFFFFFFFFFFFFFFFFFFFFFFFFFFFFFFFFFFFFFFFFFFFFFFFFFFF  
FFFFFFFFFFFFFFFFFFFFFFFFFFFFFFFFFFFFFFFFFFFFFFFFFFFFFFFFFFFFFFFFFFFFFFFFF  
@A00155:342:HHGFNDSXY:1:2607:27715:8813 2:N:0:GAACCTAG+TCCGCATA  
GGACTCGTCAGGTAGCCTACTAGACTACGACTTACACGGTAGGTCGTGAACAAGCCCCGAGTACATCT  
CCTTTGGAACCAGGAGACCCCTCCGGTCTTGTCCAACCTCTGTTTCGGCAGAGGATACCGTGCTCCAC  
+  
FFFFFFFFFFFFFFFFFFFFFFFFFFFFFFFFFFFFFFFFFFFFFFFFFFFFFFFFFFFFFFFFFFFFFFFFF  
FFFFFFFFFFFFFFFFFFFFFFFFFFFFFFFFFFFFFFFFFFFFFFFFFFFFFFFFFFFFFFFFFFFFFFFFF  
@A00155:342:HHGFNDSXY:1:2607:27715:8813 2:N:0:GAACCTAG+TCCGCATA  
GGACTCGTCAGGTAGCCTACTAGACTACGACTTACACGGTAGGTCGTGAACAAGCCCCGAGTACATCT  
CCTTTGGAACCAGGAGACCCCTCCGGTCTTGTCCAACCTCTGTTTCGGCAGAGGATACCGTGCTCCAC

@A00155:342:HHGFNDSXY:1:2607:11035:29403 2:N:0:GAACCTAG+TCCGCATA  
GAAGTGGAGACCCCTCCGGTCTTGTCCAACCTCTGTTTCGGCAGAGGATACCGTGCTCCACAGCTGT  
AAGGCTGTGGGCCCCGAGAGAAGTCGCTCTCTCTTGCCCTCCACATCCCTCTCGGCATTGAGAT

+

[illegible]

@A00155:342:HHGFNDSDXY:1:2608:9995:6809 2:N:0:GAACCTAG+TCCGCATA  
GGACTCGTCAGGTAGCCTACTAGACTACGACTTACACGGTAGGTCTGTGAACAAGCCCGGAGTACATCT

+

[illegible]

@A00155:342:HHGFNDSXY:1:2608:18050:22482 2:N:0:GAACCTAG+TCCGCATA  
CGGTAGGTCGTGAACAAGCCCGGAGTACATCTCCTTTGGAAGTGGAGACCCCTCCGGTCTTGTCCTAA

+

[illegible]

@A00155:342:HHGFNDSXY:1:2608:25328:31767 2:N:0:GAACCTAG+TCCGCATA  
ACCCCTCCGGTCTTGTCCAACCTCTGTTTCGGCAGAGGATACCGTGCTCCACAGCTGTAAGGCTGTGG

+

[illegible]

@A00155:342:HHGFNDSXY:1:2610:32786:1720 2:N:0:GAACCTAG+TCCGCATA  
TGTTTCGGCAGAGGATACCGTGCTCCACAGCTGTAAGGCTGTGGGCCCCGAGAGAAGTCGCTCTCTCTC

+

```

FFFFFFFF:FFFFFFFF:FFFFFFFFFFFFFFFFFFFFFFFF:FFFFFFFFFFFFFFFFFFFFFFFFFFFFFFFFFFFFFFFF
FFFFFFFF:FFFFFFFFFFFFFFFF:FFFFFFFFFFFFFFFFFFFFFFFFFFFFFFFF:FFFFFFF:FFF:FF,FFFFFFFF

```

@A00155:342:HHGFNDSXY:1:2610:22019:3333 2:N:0:GAACCTAG+TCCGCATA  
TCCTAAAAAGGACTCGTCAGGTAGCCTACTAGACTACGACTTACACGGTAGGTCGTGAACAAGCCCGG

+

[illegible]

@A00155:342:HHGFNDSXY:1:2610:22770:11710 2:N:0:GAACCTAG+TCCGCATA  
TCCTAAAAAGGACTCGTCAGGTAGCCTACTAGACTACGACTTACACGGTAGGTCTGTGAACAAGCCCGG

+

[illegible]

@A00155:342:HHGFNDSXY:1:2610:23873:24455 2:N:0:GAACCTAG+TCCGCATA  
CGCCTTAGATCAGCTGTGTCCACTTAAGGACTCACCTCTGGCCTATGGTCATCTCAATGCCGAGAGGG

+

[illegible]

@A00155:342:HHGFNDXXY:1:2611:7817:19445 2:N:0:GAACCTAG+TCCGCATA  
GAAACCGTCGTTACTCTTCGAGTTGTGTAAGTTTCGTCCTAAAAAGGACTCGTCAGGTAGCCTACTAG

+

[illegible]



[illegible]





```
@A00155:342:HHGFNDSXY:1:2618:3965:27492 2:N:0:GAACCTAG+TCCGCATA  
ACGGTAGGTCGTGAACAAGCCCCGAGTACATCTCCTTTGGAAGTACTAGGAGACCCTCCGGTCTTGCCA  
ACCTCTGTTTCGGCAGAGGATACCGTGCTCCACAGCTGTAAGGCTGTGGGCCCGAGAGAAGTCGCTCT  
+  
FFFFFFFFF:FFFFFFFFFFFFFFFFFFFFFFFFFFFFFFFFFFFFFFFFFFFFFFFFFFFFFFFFFFFFFFF  
FFFFFFFFFFFFFFFFFFFFF:FFFFFFFF:F:FF:F,F,FFFFFFFFF:FF:FFFFFF:  
@A00155:342:HHGFNDSXY:1:2619:18123:10739 2:N:0:GAACCTAG+TCCGCATA  
GGACTCGTCAGGTAGCCTACTAGACTACGACTTACACGGTAGGTCGTGAACAAGCCCCGAGTACATCT  
CCTTTGGAACAAGGAGACCCTCCGGTCTTGCCAACCTCTGTTTCGGCAGAGGATACCGTGCTCCAC  
+  
FFFFFFFFFFFFFFFFF:FFFFFFFFFFFFFFFFFFFFFFFFFFFFFFFFFFFFFFFFFFFFFFFFFFFFFFF  
FFFFFFFFF,F,FFFFFFFFF:FFFFFFFFFFFFFFFFFFFFFFFFFFFFFFFFFFFFFFFFF:FF:FFFFFF:F:FFF:F:FF  
@A00155:342:HHGFNDSXY:1:2619:22761:18865 2:N:0:GAACCTAG+TCCGCATA  
TAGGAGACCCTCCGGTCTTGCCAACCTCTGTTTCGGCAGAGGATACCGTGCTCCACAGCTGTAAGG  
CTGTGGGCCCGAGAGAAGTCGCTCTCTCTCGCCCTCCACATCCCTCTCGGCATTGAGATGACCATAGG  
+  
FFFFFFFFF:FFFFFFFFFFFFFFFFFFFFFFFFFFFFFFFFFFFFFFFFFFFFFFFFFFFFFFFFFFFFFFF,FF  
FFFFFFFFFFFFFFFFFFFFFFFFFFFFFFFFFFFFFFFFFFFFFFFFFFFFFFFFFFFFFFFFFFFFFFFFF  
@A00155:342:HHGFNDSXY:1:2619:27362:29997 2:N:0:GAACCTAG+TCCGCATA  
AGTACATCTCCTTTGGAACCAGGAGACCCTCCGGTCTTGCCAACCTCTGTTTCGGCAGAGGATACCA  
GTGCTCCACAGCTGTAAGGCTGTGGGCCCGAGAGAAGTCGCTCTCTCTCGCCCTCCACATCCC  
+  
FFFFFFFFFFFFFFFFFFFFFFFFFFFFFFFFFFFFFFFFFFFFFFFFFFFFFFFFFFFFFFFFFFFFFFFFF,FF  
FFFFFFFFFFFFFFFFFFFFFFFFFFFFFFFFFFFFFFFFFFFFFFFFFFFFFFFFFFFFFFFFFFFFFFFFF  
@A00155:342:HHGFNDSXY:1:2619:29053:34366 2:N:0:GAACCTAG+TCCGCATA  
TACTCTTCGAGTTGTGTAAGTTTCGTCTAAAAGGACTCGTCAGGTAGCCTACTAGACTACGACTTA  
CACGGTAGGTCGTGAACAAGCCCCGAGTACATCTCCTTTGGAAGTACTAGGAGACCCTCCGGTCTTGTC  
+  
FFFFF:FFFFFFFFFFFFFF::FFFFFFFFFFFFFFFFFFFFFFFFFFFFFFFFFFFFFFFFFFFFFFFFF  
FFFFFFFFFFFFFFFFFFFFFFFFFFFFFFFFFFFFFFFFFFFFFFFFFFFFFFFFFFFFFFFFFFFFFFFFF  
@A00155:342:HHGFNDSXY:1:2621:10131:28870 2:N:0:GAACCTAG+TCCGCATA  
TAGGAGACCCTCCGGTCTTGCCAACCTCTGTTTCGGCAGAGGATACCGTGCTCCACAGCTGTAAGG  
CTGTGGGCCCGAGAGAAGTCGCTCTCTCTCGCCCTCCACATCCCTCTCGGCATTGAGATGACCATAGG  
+  
FFFFFFFFFFFFFFFFFFFFFFFFFFFFFFFFFFFFFFFFFFFFFFFFFFFFFFFFFFFFFFFFFFFFFFFFF  
FFFFFFFFFFFFFFFFFFFFFFFFFFFFFFFFFFFFFFFFFFFFFFFFFFFFFFFFFFFFFFFFFFFFFFFFF  
@A00155:342:HHGFNDSXY:1:2621:21314:35493 2:N:0:GAACCTAG+TCCGCATA  
CCTCCGGTCTTGCCAACCTCTGTTTCGGCAGAGGATACCGTGCTCCACAGCTGTAAGGCTGTGGGC  
CGAGAGAAGTCGCTCTCTCTCGCCCTTACATCCCTCTCGGCATTGAGATGACCATAGGCCAGAG  
+  
FFFFFFFFFFFFFFFFFFFFFFFFFFFFFFFFFFFFFFFFFFFFFFFFFFFFFFFFFFFFFFFFFFFFFFFFF  
FF,FFF:FFFFFFFFFFFFFFFFFFFFFFFFFFFFFFFFFFFFFFFFF:F,FFFFFFFFFFFFFFFFF  
@A00155:342:HHGFNDSXY:1:2621:26259:36229 2:N:0:GAACCTAG+TCCGCATA  
GTACATCTCCTTTGGAAGTACTAGGAGACCCTCCGGTCTTGCCAACCTCTGTTTCGGCAGAGGATACCG  
TGCTCCACAGCTGTAAGGCTGTGGGCCCGAGAGAAGTCGCTCTCTCTCGCCCTCCACATCCCTCTCGG  
+  
FFFFFFFFFFF,:FFFFFFFFFFFFFFFFFFFFFFFFFFFFFFFFFFFFFFFFFFFFFFFFFFFFFFFFF  
FFFFFFFFFFFFFFFFFFFFFFFFFFFFFFFFFFFFFFFFF:FFFFFFFF,F:FFFFFF:FFFFFFFFF  
@A00155:342:HHGFNDSXY:1:2622:29839:6355 2:N:0:GAACCTAG+TCCGCATA  
GTGTAAGTTTCGTCTAAAGGACTCGTCAGGTAGCCTACTAGACTACGACTTACACGGTAGGTCGT  
GAACTAGCCCGAGTACATCTCCTTTGGAAGTACTAGGAGACCCTCCGGTCTTGCCAACCTCTGTTTCG
```

@A00155:342:HHGFNDSXY:1:2622:9091:6872 2:N:0:GAACCTAG+TCCGCATA  
ACTAGACTACGACTTACACGGTAGGTCGTGAACAAGCCCGGAGTACATCTCCTTTGGAACCAGGAGAC  
CCCTCCGGTCTTGTCCAACCTCTGTTTCGGCAGAGGATACCGTGCTCCACAGCTGTAAGGCTGTGGGC  
+  
FFFFFFFFFFFFFF:FFFFFFFFFFFFFF:FFFFFFFFFFFFFF:FFFFFFFFFFFFFF:FFFFFFFFFFFFFF  
FFFFFFFFFFFFFF:FFFFFFFFFFFFFF:FFFFFFFFFFFFFF:FFFFFFFFFFFFFF:FFFFFFFFFFFFFF  
@A00155:342:HHGFNDSXY:1:2622:23357:8155 2:N:0:GAACCTAG+TCCGCATA  
GCTCCACAGCTGTAAGGCTGTGGGCCCCGAGAGAAGTCGCTCTCTCTCGCCCTCCACATCCCTCTCGGC  
ATTGAGATGACCATAGGCCAGAGGTGAGTCCTTAAGTGACACAGCTGATCTAAGGCGGTGTGGTGGG  
+  
FFFFFFFFFFFFFF:FFFFFFFFFFFFFF:FFFFFFFFFFFFFF:FFFFFFFFFFFFFF:FFFFFFFFFFFFFF  
F:FFFFFFFFFFFFFF:FFFFFFFFFFFFFF:FFFFFFFFFFFFFF:FFFFFFFFFFFFFF:FFFFFFFFFFFFFF  
@A00155:342:HHGFNDSXY:1:2622:11080:12226 2:N:0:GAACCTAG+TCCGCATA  
AAAAGGACTCGTCAGGTAGCCTACTAGACTACGACTTACACGGTAGGTCGTGAACAAGCCCGGAGTAC  
ATCTCCTTTGGAACCTTGAGACCCCTCCGGTCTTGTCCAACCTCTGTTTCGGCAGAGGATACCGTGCT  
+  
FFFFFFFFFFFFFF:FFFFFFFFFFFFFF:FFFFFFFFFFFFFF:FFFFFFFFFFFFFF:FFFFFFFFFFFFFF  
FFFFFFFFFFFFFF:FFFFFFFFFFFFFF:FFFFFFFFFFFFFF:FFFFFFFFFFFFFF:FFFFFFFFFFFFFF  
@A00155:342:HHGFNDSXY:1:2622:19244:20729 2:N:0:GAACCTAG+TCCGCATA  
AAAAGGACTCGTCAGGTAGCCTACTAGACTACGACTTACACGGTAGGTCGTGAACAAGCCCGGAGTAC  
ATCTCCTTTGGAACCTAGGAGACCCCTCCGGTCTTGTCCAACCTCTGTTTCGGCAGAGGATACCGTGCT  
+  
FFFFFFFFFFFFFF:FFFFFFFFFFFFFF:FFFFFFFFFFFFFF:FFFFFFFFFFFFFF:FFFFFFFFFFFFFF  
FFFFFFFFFFFFFF:FFFFFFFFFFFFFF:FFFFFFFFFFFFFF:FFFFFFFFFFFFFF:FFFFFFFFFFFFFF  
@A00155:342:HHGFNDSXY:1:2622:30192:26725 2:N:0:GAACCTAG+TCCGCATA  
ACTTACACGGTAGGTCGTGAACAAGCCCGGAGTACATCTCCTTTGGAACCTAGGAGACCCCTCCGGTCT  
TGTCCAACCTCTGTTTCGGCAGAGGATACCGTGCTCCACAGCTGTAAGGCTGTGGGCCCCGAGAGAAGT  
+  
FFFFFFFFFFFFFF:FFFFFFFFFFFFFF:FFFFFFFFFFFFFF:FFFFFFFFFFFFFF:FFFFFFFFFFFFFF  
FFFFFFFFFFFFFF:FFFFFFFFFFFFFF:FFFFFFFFFFFFFF:FFFFFFFFFFFFFF:FFFFFFFFFFFFFF  
@A00155:342:HHGFNDSXY:1:2622:19660:37043 2:N:0:GAACCTAG+TCCGCATA  
TCCAAGGACGAAACCGTCGTTACTCTTGAGTTGTGTAAGTTTCGTCCTAAAAAGGACTCGTCAGGTA  
GCCTACTAGACTACGACTTACACGGTAGGTCGTGAACAAGCCCGGAGTACATCTCCTTTGGAACCTAGG  
+  
FFFFFFFFFFFFFF:FFFF:F  
FFFFFFFFFFFFFF:FFFFFFFFFFFFFF:FFFFFFFFFFFFFF:FFFFFFFFFFFFFF:FFFFFFFFFFFFFF  
@A00155:342:HHGFNDSXY:1:2623:31015:19163 2:N:0:GAACCTAG+TCCGCATA  
CCTTTGGAACCTAGGAGACCCCTCCGGTCTTGTCCAACCTCTGTTTCGGCAGAGGATACCGTGCTCCAC  
AGCTGTAAGGCTGTGGGCCCCGAGAGAAGTCGCTCTCTCTCGCCCTCTACATCCCTCTCGGCATT  
+  
FFFFFFFFFFFFFF:FFFFFFFFFFFFFF:FFFFFFFFFFFFFF:FFFFFFFFFFFFFF:FFFFFFFFFFFFFF  
FFFFFFFFFFFFFF:FFFFFFFFFFFFFF:FFFFFFFFFFFFFF:FFFFFFFFFFFFFF:FFFFFFFFFFFFFF  
@A00155:342:HHGFNDSXY:1:2623:10484:22686 2:N:0:GAACCTAG+TCCGCATA  
GGACTCGTCAGGTAGCCTACTAGACTACGACTTACACGGTAGGTCGTGAACAAGCCCGGAGTACATCT  
CCTTTGGAACCTAGGAGACCCCTCCGGTCTTGTCCAACCTCTGTTTCGGCAGAGGATACCGTGCTCCAC  
+  
FFFFFFFFFFFFFF:FFFFFFFFFFFFFF:FFFFFFFFFFFFFF:FFFFFFFFFFFFFF:FFFFFFFFFFFFFF  
FFFFFFFFFFFFFF:FFFFFFFFFFFFFF:FFFFFFFFFFFFFF:FFFFFFFFFFFFFF:FFFFFFFFFFFFFF  
@A00155:342:HHGFNDSXY:1:2623:31584:23500 2:N:0:GAACCTAG+TCCGCATA  
GAACAAGCCCGGAGTACATCTCCTTTGGAACCTAGGAGACCCCTCCGGTCTTGTCCAACCTCTGTTTCG  
GCAGAGGATACCGTGCTCCACAGCTGTAAGGCTGTGGGCCCCGAGAGAAGTCGCTCTCTCTCGCCCTCT  
+  
FFFFFFFFFFFFFF:FFFFFFFFFFFFFF:FFFFFFFFFFFFFF:FFFFFFFFFFFFFF:FFFFFFFFFFFFFF  
FFFFFFFFFFFFFF:FFFFFFFFFFFFFF:FFFFFFFFFFFFFF,FFFFFFFFFFFFFF:FFFFFFFFFFFFFF

@A00155:342:HHGFNDSXY:1:2623:11424:24251 2:N:0:GAACCTAG+TCCGCATA  
TACTCTTCGAGTTGTGTAAGTTTCGTCCTAAAAAGGACTCGTCAGGTAGCCTACTAGACTACGACTTA  
CACGGTAGGTCGTGAACAAGCCCGGAGTACATCTCCTTTGGAACCAGGAGACCCCTCCGGTCTTGTC  
+  
FFFFF,FFFFFFFFFFFFFFFF:FFFFFFFFFFFF:FFFFFFFFFFFFFFFFFFFFFFFFFFFFFFFFFFFF  
FFFFFFFF:FFFFFFFFFFFFFFFFFFFFFFFFFFFFFFFFFFFFFFFFFFFFFFFFFFFFFFFFFFFFFFFF  
@A00155:342:HHGFNDSXY:1:2624:26883:34460 2:N:0:GAACCTAG+TCCGCATA  
TGAACAGGCCCGGAGTACATCTCCTTTGGAAGTGGAGACCCCTCCGGTCTTGTCACCTCTGTTTC  
GGCAGAGGATACCGTGCTCCACAGCTGTAAGGCTGTGGGCCGAGAGAAGTCGCTCTCTCTCGCCCTC  
+  
FFFFF,,FFFFFFFFFFFFFFFFFFFFFFFFFFFFFFFFFFFF,FFFFFFFF,FFFFFFFFFFFFFFFFFFFF:FFFF  
FF:FF:FFFF,F::FFFFFFFFF,FFFFFFFFFFFF:FFFFFFFFFFFFFFFFFFFFFFFF:FFFFFFFF,:FFF  
@A00155:342:HHGFNDSXY:1:2625:17508:4038 2:N:0:GAACCTAG+TCCGCATA  
AAGGACGAAACCGTCGTTACTCTTCGAGTAGTGTAAGTTTCGTCCTAAAAAGGACTCGTCAGGTAGCC  
TACTAGACTACGACTTACACGGTAGGTCGTGAACAAGCCCGGAGTACATCTCCTTTGGAAGTGGAGAG  
+  
F:FFFFFFFFFFFFFFFFFFFFFFFFFFFF:FFFFFF,FFF:FFFFFF,:FFFFFFFFFFFFFFFFFFFFF:  
FFFFFFFFFFFFFFFFFFFFFFFFFFFF,FFF,FF:FFFFFF:FFFFFFFFFFFFFFFFFFFFFFFF:FFFFFFF  
@A00155:342:HHGFNDSXY:1:2625:27624:30044 2:N:0:GAACCTAG+TCCGCATA  
TCGGCAGAGGATACCGTGCTCCACAGCTGTAAGGCTGTGGGCCGAGAGAAGTCGCTCTCTCTCGCCC  
TCCACATCCCTCTCGGCATTGAGATGACCATAGGCCAGAGGTGAGTCCTTAAGTGGACACA  
+  
FFFFFFFFFFFFFFFFFFFFFFFFFFFFFFFFFFFF:FFFFFFFFFFFF:FFFFFFFFFFFFF  
FFFFFFFFFFFFFFFFFFFFFFFFFFFF,FFF:FFFFFFFFFFFFFFFFFFFFFFFFFFFFFFFFFFFF  
@A00155:342:HHGFNDSXY:1:2625:1344:35164 2:N:0:GAACCTAG+TCCGCATA  
TTACTCTTCGAGTTGTGTAAGTTTCGTCCTAAAAAGGACTCGTCAGGTAGCCTACTAGACTACGACTT  
ACACGGTAGGTCGTGAACAAGCCCGGAGTACATCTCCTTTGGAAGTGGAGACCCCTCCGGTCTTGTC  
+  
:FFFFFFF:F:FFFFFFF,FFFFFFFFF,FFF::F,FF,FFFFF::FFF,F::::FF:FFFFFF::FF  
F::FF:FFFFFFF:FF:FF:FFFF:FF,F:FFFF,FFF,F,.,FF:F,::F,:F::FFF:FFFF:  
@A00155:342:HHGFNDSXY:1:2626:1036:4977 2:N:0:GAACCTAG+TCCGCATA  
TACTCTTCGAGTTGTGTAAGTTTCGTCCTAAAAAGGACTCGTCAGGTAGCCTACTAGACTACGACTTA  
CACGGTAGGTCGTGAACAAGCCCGGAGTACATCTCCTTTGGAAGTGGAGACCCCTCCGGTCTTGTC  
+  
FFFF:FFFFFFFFFFFFFFFFFFFFFFFFFFFF:FFF,F:,.,FFFFFFFF,FFFFFFFF:FFFF:FFFF:FFF:FF:  
,:FFFFFFFF:FFFF::F:FF:FF:FFFF:F,FFFF:FFFF,F:FF,:FF::FF:FFFF,F:FFF  
@A00155:342:HHGFNDSXY:1:2626:20166:11397 2:N:0:GAACCTAG+TCCGCATA  
GTTTCGTCCTAAAAAGGACTCGTCAGGTAGCCTACTAGACTACGACTTACACGGTAGGTCGTGAACA  
GCCCGGAGTACATCTCCTTTGGAAGTGGAGACCCCTCCGGTCTTGTCACCTCTGTTTCGGCAGAG  
+  
FF,FFFFFFFFFFFFFFFFFFFFFFFFFFFFFFFFFFFFFFFFFFFFFFFFFFFFFFFFFFFF:FFFF:FFFFFFFFFFFF  
:FFFFFFFFF:FFFFFFFFFFFFFFFFFFFF:FFFFFFFFFFFFFFFFFFFFFFFF:FFFFFFFFF:FFFFFFFFF:  
@A00155:342:HHGFNDSXY:1:2626:3360:16579 2:N:0:GAACCTAG+TCCGCATA  
GACGAAACCGTCGTTACTCTTGGAGTTGTGTAAGTTTCGTCCTAAAAAGGACTCGTCAGGTAGCCTAC  
TAGACTACGACTTACACGGTAGGTCGTGAACAAGCCCGGAGTACATCTCCTTTGGAAGTGGAGACCC  
+  
FFFFFFFFFFFFFFFFFFFFFFFF:FFFFFFFFFFFF:FFFFFFFF:FF::FFFFFFFFFFFFFFFFFFFFF  
:FFFFFFFFFFFFFFFFFFFF,FFFFFFFFFFFFFFFFFFFFFFFFFFFFFFFFFFFFFFFF,FFFFFFFF  
@A00155:342:HHGFNDSXY:1:2626:14036:18756 2:N:0:GAACCTAG+TCCGCATA  
CAGGTAGCCTACTAGACTACGACTTACACGGTAGGTCGTGAACAAGCCCGGAGTACATCTCCTTTGGA  
ACTAGGAGACCCCTCCGGTCTTGTCACCTCTGTTTCGGCAGAGGATACCGTGCTCCACAGCTGTAA  
+  
FFFFFFFFFFFFFFFFFFFFFFFFFFFFFFFFFFFFFFFFFFFFFFFFFFFFFFFFFFFFFFFFFFFFF  
FFFFFFFFFFFFFFFFFFFF:FFFFFFFFFFFFFFFFFFFFFFFFFFFFFFFFFFFFFFFFFFFFFFFFFFFFF



[illegible]



@A00155:342:HHGFNDSXY:1:2630:11541:30718 2:N:0:GAACCTAG+TCCGCATA  
ACGGTAGGTCGTGAACAAGCCCGAGTACATCTCCTTTGAACTAGGAGACCCCTCCGGTCTTGCCA  
ACCTCTGTTTCGGCAGAGGATACCGTGCTCCACAGCTGTAAGGCTGTGGGCCCGAGAGAAGTCGCTCT  
+  
FFFFFFFFFFFFFFFFFFFFFFFFFFFFFFFFFFFFFFFFFFFFFFFFFFFFFFFFFFFFFFFFFFFFFFFFFFFFF  
FFFFFFFFFFFFFFFFFFFFFFFFFFFFFFFFFFFFFFFFFFFFFFFFFFFFFFFFFFFFFFFFFFFFFFFFFFFFFFFFF  
@A00155:342:HHGFNDSXY:1:2630:11641:31641 2:N:0:GAACCTAG+TCCGCATA  
ACGGTAGGTCGTGAACAAGCCCGAGTACATCTCCTTTGAACTAGGAGACCCCTCCGGTCTTGCCA  
ACCTCTGTTTCGGCAGAGGATACCGTGCTCCACAGCTGTAAGGCTGTGGGCCCGAGAGAAGTCGCTCT  
+  
FFFFFFFFFFFFFFFFFFFFFFFFFFFFFFFFFFFFFFFFFFFFFFFFFFFFFFFFFFFFFFFFFFFFFFFFFFFFFFFFF  
FFFFFFFFFFFFFFFFFFFFFFFFFFFFFFFFFFFFFFFFFFFFFFFFFFFFFFFFFFFFFFFFFFFFFFFFFFFFFFFFF  
@A00155:342:HHGFNDSXY:1:2630:8196:35634 2:N:0:GAACCTAG+TCCGCATA  
GAGACCCCTCCGGTCTTGCCAACCTCTGTTTCGGCAGAGGATACCGTGCTCCACAGCTGTAAGGCTG  
TGGGCCCGAGAGAAGTCGCTCTCTCTCGCCCTCCACATCCCTCTCGGCATTGAGATGACCATAGGCCA  
+  
FFFFFFFFFFFFFFFFFFFFFFFFFFFFFFFFFFFFFFFFFFFFFFFFFFFFFFFFFFFFFFFFFFFFFFFFFFFFFFFFF  
FFFFFFFFFFFFFFFFFFFFFFFFFFFFFFFFFFFFFFFFFFFFFFFFFFFFFFFFFFFFFFFFFFFFFFFFFFFFFFFFF  
@A00155:342:HHGFNDSXY:1:2631:24623:1861 2:N:0:GAACCTAG+TCCGCATA  
GAGACCCCTCCGGTCTTGCCAACCTCTGTTTCGGCAGAGGATACCGTGCTCCACAGCTGTAAGGCTG  
TGGGCCCGAGAGAAGTCGCTCTCTCTCGCCCTCCACATCCCTCTCGGCATTGAGATGAC  
+  
FFFFFFFFFFFFFFFFFFFFFFFFFFFFFFFFFFFFFFFFFFFFFFFFFFFFFFFFFFFFFFFFFFFFFFFFFFFFFFFFF  
FFFFFFFFFFFFFFFFFFFFFFFFFFFFFFFFFFFFFFFFFFFFFFFFFFFFFFFFFFFFFFFFFFFFFFFFFFFFFFFFF  
@A00155:342:HHGFNDSXY:1:2631:27914:15201 2:N:0:GAACCTAG+TCCGCATA  
AGTTTCGTCCTAAAAAGGACTCGTCAGGTAGCCTACTAGACTACGACTTACACGGTAGGTCGTGAACA  
AGCCCGGAGTACATCTCCTTTGGAAGTACTAGGAGACCCCTCCGGTCTTGCCAACCTCTGTTTCGGCAGA  
+  
F:FFFFFFFFFFFFFFF:FFFFFFFFFFFFFFFFFFFFFFFFFFFFFFFFFFFFFFFFFFFFFFFFFFFFFFFFFFFFF  
F:FF,FFFF,:FFFFFFFFFFF,F,FFFFFFFF:FF:FFFFFFFFFFFF,FFFFFFFFFFFFFFFF:FFF  
@A00155:342:HHGFNDSXY:1:2631:7084:21872 2:N:0:GAACCTAG+TCCGCATA  
AATCCCGGAGTACATCTCCTTTGAACTAGGAGACCCCTCCGGTCTTGCCAACCTCTGTTTCGGCAG  
AGGATACCGTGCTCCACAGCTGTAAGGCTGTGGGCCCGAGAGAAGTCGCTCTCTCTCGCC  
+  
FF,FF:FFF:FFFFFFFFFFFFFFFFFFFFFFFFFFFFFFFFFFFFFFFFFFFFFFFFFFFFFFFFFFFFFFFFFFFFF  
FFFFF:FFF:FFFFFFFF:FF:F:,FFFFFF:FFF:FFFFFF,,FFFFFFFFFFFFFFFFFFFFF  
@A00155:342:HHGFNDSXY:1:2631:13946:24236 2:N:0:GAACCTAG+TCCGCATA  
GAACTAGGAGACCCCTCCGGTCTTGCCAACCTCTGTTTCGGCAGAGGATACCGTGCTCCACAGCTGT  
AAGGCTGTGGGCCCGAGAGAAGTCGCTCTCTCTCGCCCTCTACATCCCTCTCGGCATTGAGAT  
+  
FFFFFFFFFFFFFFFFFFFFFFFFFFFFFFFFFFFFFFFFFFFFFFFFFFFFFFFFFFFFFFFFFFFFFFFFFFFFF  
FFFFFFFFFFFFFFFFFFFFFFFFFFFFFFFFFFFFFFFFFFFFFFFFFFFFFFFFFFFFFFFFFFFFFFFFFFFFF  
@A00155:342:HHGFNDSXY:1:2631:32913:30686 2:N:0:GAACCTAG+TCCGCATA  
AAGGACTCGTCAGGTAGCCTACTAGACTACGACTTACACGGTAGGTCGTGAACAAGCCCGGAGTACAT  
CTCCTTTGAACTAGGAGACCCCTCCGGTCTTGCCAACCTCTGTTTCGGCAGAGGATACCGTGCTCC  
+  
FFFFFFFFFFFFFFFFFFFFFFFFFFFFFFFFFFFFFFFFFFFFFFFFFFFFFFFFFFFFFFFFFFFFFFFFFFFFF  
FFFFFFFFFFFFFFFFFFFFFFFFFFFFFFFFFFFFFFFFFFFFFFFFFFFFFFFFFFFFFFFFFFFFFFFFFFFFF  
@A00155:342:HHGFNDSXY:1:2632:31919:18286 2:N:0:GAACCTAG+TCCGCATA  
GTTTCGTCCTAAAAAGGACTCGTCAGGTAGCCTACTAGACTACGACTTATACGGTAGGTCGTGAACAA  
GCCCGGAGTACATCTCCTTTGGAAGTACTAGGAGACCCCTCCGGTCTTGCCAACCTCTGTTTCGGCAGAG  
+  
FFFF:F:FFFFFFFFFFFFFFFFFFFFFFFFFFFFFFFFFFFFFFFFFFFFFFFFFFFFFFFFFFFFFFFFFFFFF  
FFFFFFFFFFFFFFFFFFFFFFFFFFFFFFFFFFFFFFFFFFFFFFFFFFFFFFFFFFFFFFFFFFFFFFFFFFFFF  
@A00155:342:HHGFNDSXY:1:2632:31919:18286 2:N:0:GAACCTAG+TCCGCATA  
GTTTCGTCCTAAAAAGGACTCGTCAGGTAGCCTACTAGACTACGACTTATACGGTAGGTCGTGAACAA  
GCCCGGAGTACATCTCCTTTGGAAGTACTAGGAGACCCCTCCGGTCTTGCCAACCTCTGTTTCGGCAGAG

[illegible]

$+$ 

@A00155:342:HHGFNDSXY:1:2635:21079:19523 2:N:0:GAACCTAG+TCCGCATA  
GTACATCTCCTTTGGAACCAGGAGACCCCTCCGGTCTTGTCCAACCTCTGTTTCGGCAGAGGATACCG  
TGCTCCACAGCTGTAAGGCTGTGGGCCCGAGAGAAGTCGCTCTCTCTCGCCCTCCACATCCCTCTCGG

+

@A00155:342:HHGFNDSXY:1:2635:11867:33285 2:N:0:GAACCTAG+TCCGCATA  
TCGTGAACAAGCCCGGAGTACATCTCCTTTGGAAGTACGAGACCCCTCCGGTCTTGTCCAACCTCTGT  
TTCGGCAGAGGATACCGTGCTCCACAGCTGTAAGGCTGTGGGCCCCGAGAGAAGTCACTCTCTCTCGCC

+

@A00155:342:HHGFNDSXY:1:2636:30083:10222 2:N:0:GAACCTAG+TCCGCATA  
CGGTAGGTCGTGAACAAGCCCGGAGTACATCTCCTTTGGAACAAGGAGACCCCTCCGGTCTTGTCCAA  
CCTCTGTTTCGGCAGAGGATACCGTGCTCCACAGCTGTAAGGCTGTGGGCCCCGAGAGAAGTCGCTCTC

+

@A00155:342:HHGFNDSXY:1:2636:30020:14716 2:N:0:GAACCTAG+TCCGCATA  
AACGACGGTTTCGTCTTGGAACGGACTCATCAGGGAGCCTACTAGACTCCGACCGTCATGGGGGTTCT  
AAACCCATGCCCCGCCACACCGCCTTAGATCAGCTGTGTCCACTTAAGGACTCACCTCTGGCCTATGG

+

@A00155:342:HHGFNDSXY:1:2637:21856:24032 2:N:0:GAACCTAG+TCCGCATA  
AGCCCGGAGTACATCTCCTTTGGAAGTACGAGACCCCTCCGGTCTTGTCCAACCTCTGTTTCGGCAGA  
GGATACCGTGCTCCACAGCTGTAAGGCTGTGGGCCCCGAGAGAAGTCGCTCTCTCTCGCCCTCCACATC

+

@A00155:342:HHGFNDSXY:1:2637:26711:24486 2:N:0:GAACCTAG+TCCGCATA  
GAAACCGTCGTTACTCTTCGAGTTGTGTAAGTTTCGTCCTAAAAAGGACTCGTCAGGTAGCCTACTAG  
ACTACGACTTACACGGTAGGTCGTGAACAAGCCCGGAGTACATCTCCTTTGGAAGTGGAGAGCCCTC

 $+$ 

@A00155:342:HHGFNDSXY:1:2637:27389:24565 2:N:0:GAACCTAG+TCCGCATA  
GAGTAACGACGGTTTCGTCTTGGAACGGACTCATCAGGGAGCCTACTAGACTCCGACCGTCATGGGG  
GTTCAAACCCATGCCCCACCAACCGCCTTAGATCAGCTGTGTCCACTTAAGGACTCACCTCTGGCCT

+

@A00155:342:HHGFNDSXY:1:2637:5692:29450 2:N:0:GAACCTAG+TCCGCATA  
GTACATCTCCTTTGGAAGTAGGAGACCCCTCCGGTCTTGTCCAACCTCTGTTTCGGCAGAGGATACCG  
TGCTCCACAGCTGTAAGGCTGTGGGCCCCGAGAGAAGTCGCTCTCTCTCGCCCTCTACATCCCTCTCGG

+

\_\_\_\_\_

[illegible]

@A00155:342:HHGFNDSXY:1:2641:18615 2:N:0:GAACCTAG+TCCGCATA  
ACTACGACTTACACGGTAGGTCGTGAACAAGCCCGAGTACATCTCCTTTGGAAGTCTAGGAGACCCCTC  
CGGTCTTGTTCCAACCTCTGTTTCGGCAGAGGATACCGTGCTCCACAGCTGTAAGGCTGTGGGCCCGAG  
+  
FFFFFFFFFFFFFFFFFFFFFFFFFFFFFFFFFFFFFFFFFFFFFFFFFFFFFFFFFFFFFFFFFFFFFFFFFFFFF  
FFFFF:FFFFFFFFFFFFFFFFFFFFFFFFFFFFFFFFFFFFFFFFFFFFFFFFFFFFFFFFFFFFFFFFFFFFFFF  
@A00155:342:HHGFNDSXY:1:2641:8151:29262 2:N:0:GAACCTAG+TCCGCATA  
GAAACCGTCGTTACTCTTTGAGTTGTGTAAGTTTCGTCCTAAAAAGGACTCGTCAGGTAGCCTACTAG  
ACTACGACTTACACGGTAGGTCGTGAACAAGCCCGAGTACATCTCCTTTGGAAGTCTAGGAGACCCCTC  
+  
FFFFFFFFFFFFFFFFFFFFFFFFFFFFFFFFFFFFFFFFFFFFFFFFFFFFFFFFFFFFFFFFFFFFFFFFFFFFF:  
FFFFFFFFFFFFFFFFFFFFFFFFFFFFFFFFFFFFFFFFFFFFFFFFFFFFFFFFFFFFFFFFFFFFFFFFFFFFF:  
@A00155:342:HHGFNDSXY:1:2642:18783:8594 2:N:0:GAACCTAG+TCCGCATA  
GACCCCTCCGGTCTTGTTCCAACCTCTGTTTCGGCAGAGGATACCGTGCTCCACAGCTGTAAGGCTGTG  
GGCCCCGAGAGAAGTCGCTCTCTCTCGCCCTCCACATCCCTCTCGGCATTGAGATGACCATAGGC  
+  
FFFFFFFFFFFFFFFFFFFFFFFFFFFFFFFFFFFFFFFFFFFFFFFFFFFFFFFFFFFFFFFFFFFFFFFFFFFFF:  
FFFFFFFFFFFFFFFFFFFFFFFFFFFFFFFFFFFFFFFFFFFFFFFFFFFFFFFFFFFFFFFFFFFFFFFFFFFFF:  
@A00155:342:HHGFNDSXY:1:2642:32560:27602 2:N:0:GAACCTAG+TCCGCATA  
TAGGTCGTGAACAAGCCCGAGTACATCTCCTTTGGAAGTCTAGGAGACCCCTCCGGTCTTGTTCCAACCT  
CTGTTTCGGCAGAGGATACCGTGCTCCACAGCTGTAAGGCTGTGGGCCCGAGAGAAGTCGCTCTCTCT  
+  
FFFFFFFFFFFFFFFFFFFFFFFFFFFFFFFFFFFFFFFFFFFFFFFFFFFFFFFFFFFFFFFFFFFFFFFFFFFFF:  
FFFFFFFFFFFFFFFFFFFFFFFFFFFFFFFFFFFFFFFFFFFFFFFFFFFFFFFFFFFFFFFFFFFFFFFFFFFFF:  
@A00155:342:HHGFNDSXY:1:2642:32099:33223 2:N:0:GAACCTAG+TCCGCATA  
ACTCTTTGAGTTGTGTAAGTTTCGTCCTAAAAAGGACTCGTCAGGTAGCCTACTAGACTACGACTTAC  
ACGGTAGGTCGTGAACAAGCCCGAGTACATCTCCTTTGGAAGTCTAGGAGACCCCTCCGGTCTTGTTCCA  
+  
FFFFFFFFFFFFFFFFFFFFFFFFFFFFFFFFFFFFFFFFFFFFFFFFFFFFFFFFFFFFFFFFFFFFFFFFFFFFF:  
FFFFFFFFFFFFFFFFFFFFFFFFFFFFFFFFFFFFFFFFFFFFFFFFFFFFFFFFFFFFFFFFFFFFFFFFFFFFF:  
@A00155:342:HHGFNDSXY:1:2643:12879:27774 2:N:0:GAACCTAG+TCCGCATA  
GAACAAGCCCGAGTACATCTCCTTTGGAAGTCTAGGAGACCCCTCCGGTCTTGTTCCAACCTCTGTTTCG  
GCAGAGGATACCGTGCTCCACAGCTGTAAGGCTGTGGGCCCGAGAGAAGTCGCTCTCTCTCGCC  
+  
FFFFFFFFFFFFFFFFFFFFFFFFFFFFFFFFFFFFFFFFFFFFFFFFFFFFFFFFFFFFFFFFFFFFFFFFFFFFF:  
FFFFFFFFFFFFFFFFFFFFFFFFFFFFFFFFFFFFFFFFFFFFFFFFFFFFFFFFFFFFFFFFFFFFFFFFFFFFF:  
@A00155:342:HHGFNDSXY:1:2644:14353:2644 2:N:0:GAACCTAG+TCCGCATA  
CAGGTAGCCTACTAGACTACGACTTACACGGTAGGTCGTGAACAAGCCCGAGTACATCTCCTTTGGA  
ACTAGGAGACCCCTCCGGTCTTGTTCCAACCTCTGTTTCGGCAGAGGATACCGTGCTCCACAG  
+  
FFFFFFFFFFFFFFFFFFFFFFFFFFFFFFFFFFFFFFFFFFFFFFFFFFFFFFFFFFFFFFFFFFFFFFFFFFFFF:  
FFFFFFFFFFFFFFFFFFFFFFFFFFFFFFFFFFFFFFFFFFFFFFFFFFFFFFFFFFFFFFFFFFFFFFFFFFFFF:  
@A00155:342:HHGFNDSXY:1:2644:13548:3317 2:N:0:GAACCTAG+TCCGCATA  
CAGGTAGCCTACTAGACTACGACTTACACGGTAGGTCGTGAACAAGCCCGAGTACATCTCCTTTGGA  
ACTAGGAGACCCCTCCGGTCTTGTTCCAACCTCTGTTTCGGCAGAGGATACCGTGCTCCACAG  
+  
FFFFFFFFFFFFFFFFFFFFFFFFFFFFFFFFFFFFFFFFFFFFFFFFFFFFFFFFFFFFFFFFFFFFFFFFFFFFF:  
FFFFFFFFFFFFFFFFFFFFFFFFFFFFFFFFFFFFFFFFFFFFFFFFFFFFFFFFFFFFFFFFFFFFFFFFFFFFF:  
@A00155:342:HHGFNDSXY:1:2644:27832:16407 2:N:0:GAACCTAG+TCCGCATA  
GAACTAGGAGACCCCTCCGGTCTTGTTCCAACCTCTGTTTCGGCAGAGGATACCGTGCTCCACAGCTGT  
AAGGCTGTGGGCCCGAGAGAAGTCGCTCTCTCTCGCCCTCCACATCCCTCTCGGCATTGAGATGACCA  
+  
FF:FFFFFFFFFFFFFFFFFFFFFFFFFFFFFFFFFFFFFFFFFFFFFFFFFFFFFFFFFFFFFFFFFFFFFFFFFFFFF:  
F:FFFFFFFFFFFFFFFFFFFFFFFFFFFFFFFFFFFFFFFFFFFFFFFFFFFFFFFFFFFFFFFFFFFFFFFFFFFFF:  
@A00155:342:HHGFNDSXY:1:2644:27832:16407 2:N:0:GAACCTAG+TCCGCATA  
GAACTAGGAGACCCCTCCGGTCTTGTTCCAACCTCTGTTTCGGCAGAGGATACCGTGCTCCACAGCTGT  
AAGGCTGTGGGCCCGAGAGAAGTCGCTCTCTCTCGCCCTCCACATCCCTCTCGGCATTGAGATGACCA  
+

@A00155:342:HHGFNDSXY:1:2645:24089:1501 2:N:0:GAACCTAG+TCCGCATA  
TACTAGACTACGACTTACACGGTAGGTCGTGAACAAGCCCGGAGTACATCTCCTTTGGAAGTACGAGAG  
CCCCTCCGGTCTTGTCCAACCTCTGTTTCGGCAGAGGATACCGTGCTCCACAGCTGTAAGGCTGTGGG  
+  
FFF,F:FFFFF:FFFFFFFFF,FFFFFFFF:FFFFFFFFFFFFFFFFFFFFFFFFFFFFFFFF:FFFFF,FFFFF,F  
FFFFFFFFFFFFFFFF:FFFFFFFFF::F,:F:FFFFFFFFFFFFFFFF:FFFFF,FF:FFFF,FFFFFFFF  
@A00155:342:HHGFNDSXY:1:2645:4625:5024 2:N:0:GAACCTAG+TCCGCATA  
GGTCGTGAACAAGCCCGGAGTACATCTCCTTTGGAACCAGGAGACCCCTCCGGTCTTGTCCAACCTCT  
GTTTCGGCAGAGGATACCGTGCTCCACAGCTGTAAGGCTGTGGGCCCGAGAGAAGTCGCTCTCTCTCG  
+  
FFFFFFFFFFFFFFFFFFFFFFFFFFFFFFFFFFFFFFFFFFFFFFFFFFFFFFFFFFFFFFFFFFFFFFFFF,  
FFFFFFFFF::FFFFF:FFFFFFFFFFFFFFFFFFFFFFFFFFFFFFFFFFFFFFFFFFFFFFFFFFFFFFFFF  
@A00155:342:HHGFNDSXY:1:2645:16116:8015 2:N:0:GAACCTAG+TCCGCATA  
GGACTCGTCAGGTAGCCTACTAGACTACGACTTACACGGTAGGTCGTGAACAAGCCCGGAGTACATCT  
CCTTTGGAAGTACGAGACCCCTCCGGTCTTGTCCAACCTCTGTTTCGGCAGAGGATACCGTGCTCCAC  
+  
FFFFFFFFFFFFFFFFFFFFFFFFFFFFFFFFFFFFFFFFFFFFFFFFFFFFFFFFFFFFFFFFFFFFFFFFF  
FFFFFFFFFFFFFFFFFFFFFFFFF:FFFFFFFFFFFFFFFFFFFFFFFFFFFFFFFFFFFFFFFFFFFFFFFFF  
@A00155:342:HHGFNDSXY:1:2645:26069:18020 2:N:0:GAACCTAG+TCCGCATA  
GGACTCGTCAGGTAGCCTACTAGACTACGACTTACACGGTAGGTCGTGAACAAGCCCGGAGTACATCT  
CCTTTGGAAGTACGAGACCCCTCCGGTCTTGTCCAACCTCTGTTTCGGCAGAGGATACCGTGCTCCAC  
+  
FFFFFFFFFFFFFFFFFFFFFFFFFFFFFFFFFFFFFFFFFFFFFFFFFFFFFFFFFFFFFFFFFFFFFFFFF  
FFFFFFFFF,FFFFFFFFFFFFFFFFFFFFFFFFF:FFFFFFFFFFFFFFFFFFFFFFFFFFFFFFFFFFFFFFFF  
@A00155:342:HHGFNDSXY:1:2645:23610:24283 2:N:0:GAACCTAG+TCCGCATA  
TACACGGTAGGTCGTGAACAAGCCCGGAGTACATCTCCTTTGGAAGTACGAGACCCCTCCGGTCTTGT  
CCAACCTCTGTTTCGGCAGAGGATACCGTGCTCCACAGCTGTAAGGCTGTGGGCCCGAGAGAAGTCGC  
+  
FFFFFFFFFFFFFFFFFFFFFFFFFFFFFFFFFFFFFFFFFFFFFFFFFFFFFFFFFFFFFFFFFFFFFFFFF  
FFFFFFFFFFFFFFFFFFFFFFFFFFFFFFFFFFFFFFFFFFFFFFFFFFFFFFFFFFFFFFFFFFFFFFFFF  
@A00155:342:HHGFNDSXY:1:2645:25825:25676 2:N:0:GAACCTAG+TCCGCATA  
GGATGTGGAGGGCGAGAGAGAGAGACTTCTCTCGGGCCACAGCCTTACAGCTGTGGAGCACGGTATC  
CTCTGCCGAAACAGAGGTTGGACAAGACCGGAGGGGTCTCCTAGTTCCAAAGGAG  
+  
FFFFFFFFFFFFFFFFFFFFFFFFFFFFFFFFFFFFFFFFFFFFFFFFFFFFFFFFFFFFFFFFFFFFFFFFF  
FFFFFFFFFFFFFFFFFFFFFFFFFFFFFFFFF,FFFFFFFFFFFFFFFFFFFFFFFFF:FFFFFFFFF  
@A00155:342:HHGFNDSXY:1:2646:18430:15843 2:N:0:GAACCTAG+TCCGCATA  
GTTTCGTCCTTGAACGGACTCATCAGGGAGCCTACTAGACTCCGACCGTCATGGGGGTTCAAACCCA  
TGCCCCGCTACACCGCCTTAGATCAGCTGTGTCCACTTAAGGACTCACCTCTGGCCTATGGTCATCTC  
+  
FFFFF:FFFFFFFFFFFFFFFFFFFFFFFFFFFFFFFFFFFFFFFFFFFFFFFFFFFFFFFFFFFFFFFFF,FF:FFFFFFFFFFFFF  
FFFFFFFFF:FFFFFFFFFFFFF:FFFFFFFFFFFFFFFFFFFFFFFFFFFFFFFFF::FFFFFFFFFFFFFFFFF::  
@A00155:342:HHGFNDSXY:1:2646:29948:24173 2:N:0:GAACCTAG+TCCGCATA  
TTAAGGACTCACCTCTGGCCTATGGTCATCTCAATGCCGAGAGGGATGTAGAGGGCGAGAGAGAGCGA  
CTTCTCTCGGGCCACAGCCTTACAGCTGTGGAGCACGGTATCCTCTGCCGAAACAGAGGTTGGACAA  
+  
FFFFFFFFFFFFFFFFFFFFFFFFFFFFFFFFFFFFFFFFFFFFFFFFFFFFFFFFFFFFFFFFFFFFFFFFF  
FFFFFFFFFFFFFFFFFFFFFFFFF:FFFFFFFFFFFFFFFFF:FFFFFFFFFFFFFFFFFFFFFFFFF  
@A00155:342:HHGFNDSXY:1:2646:6804:32753 2:N:0:GAACCTAG+TCCGCATA  
GGTCGTGAACAAGCCCGGAGTACATCTCCTTTGGAAGTACGAGACCCCTCCGGTCTTGTCCAACCTCT  
GTTTCGGCAGAGGATACCGTGCTCCACAGCTGTAAGGCTGTGGGCCCGAGAGAAGTCGCTCTCTCTCG  
+  
FFFFFFFFFFFFFFFFFFFFFFFFF:FFFFFFF:FFFFF:FFFFFFFFFFFFFFFFFFFFFFFFFFFFFFFFF  
FFFFFFFFFFFFFFFFFFFFFFFFF:FFFFFFFFFFFFFFFFF:FFFFFFFFFFFFFFFFFFFFFFFFF

@A00155:342:HHGFNDSXY:1:2647:17228:11099 2:N:0:GAACCTAG+TCCGCATA  
CTTGTC AACCTCTGTTTCGGCAGAGGATACCGTGCTCCACAGCTGTAAGGCTGTGGGCCCGAGAGAA  
GTCGCTCTCTCTCGCCCTCCACATCCCTCTCGGCATTGAGATGACCATAGGCCAGAGGAGAGTCCTTA  
+  
FFFFFFFFFFFFFFFFFFFFFFFFFFFFFFFFFFFFFFFFFFFFFFFFFFFFFFFFFFFFFFFFFFFFFFFFFFFFF  
FFFFFFFFFFFFFFFFFFFFFFFFFFFFFFFFFFFFFFFFFFFFFFFFFFFFFFFFFFFFFFFFFFFFFFFFFFFF:F  
@A00155:342:HHGFNDSXY:1:2647:18701:13620 2:N:0:GAACCTAG+TCCGCATA  
TAGGAGACCCCTCCGGTCTTGTCCAACCTCTGTTTCGGCAGAGGATACCGTGCTCCACAGCTGTAAGG  
CTGTGGGCCCGAGAGAAGTCGCTCTCTCTCGCCCTCCACATCCCTCTCGGCATTGAGATGACCATAGG  
+  
FFFFFFFFFFFFFFFFFFFFFFFFFFFFFFFFFFFFFFFFFFFFFFFFFFFFFFFFFFFFFFFFFFFFFFFFFFFFF  
F:FFFFFFFFFFFFFFFFFFFFFFFFFFFFFFFFFFFFFFFFFFFFFFFFFFFFFFFFFFFFFFFFFFFFFFFFFFFF  
@A00155:342:HHGFNDSXY:1:2647:20193:20650 2:N:0:GAACCTAG+TCCGCATA  
GAACTAGGAGACCCCTCCGGTCTTGTCCAACCTCTGTTTCGGCAGAGGATACCGTGCTCCACAGCTGT  
AAGGCTGTGGGCCCGAGAGAAGTCGCTCTCTCTCGCCCTCCACATCCCTCTCGGCATTGAGATGACCA  
+  
FF:FFFF:FFFFFFFFFFFFFFFFFFFFFFFFFFFFFFFFFFFFFFFFFFFFFFFFFFFFFFFFFFFFFFFFFFFF,F  
FFFF:FFFFFFFFFFFFFFFFFFFFFFFFFFFFFFFFFFFFFFFFFFFFFFFFFFFFFFFFFFFFFFFFFFFFFFFF:  
@A00155:342:HHGFNDSXY:1:2648:31973:11459 2:N:0:GAACCTAG+TCCGCATA  
CACGGTAGGTCGTGAACAAGCCCGGAGTACATCTCCTTTGGAAGTACTAGGAGACCCCTCCGGTCTTGTCC  
AACCTCTGTTTCGGCAGAGGATACCGTGCTCCACAGCTGTAAGGCTGTGGGCCCGAGAGAAGTCGCTC  
+  
FFFFFFFFF:FFFFFFFFFFFFFFFFFFFFFFFFFFFFFFFFFFFFFFFFFFFFFFFFFFFFFFFFFFFFFFFFFFFF  
FFFFFFFFF:FFFFFFFFFFFFFFFFFFFFFFFFFFFFFFFFFFFFFFFFFFFFFFFFFFFFFFFFFFFFFFFFFFFF:  
@A00155:342:HHGFNDSXY:1:2648:30038:13182 2:N:0:GAACCTAG+TCCGCATA  
GGAAGTACTAGGAGACCCCTCCGGTCTTGTCCAACCTCTGTTTCGGCAGAGGATACCGTGCTCCACAGCTG  
TAAGGCTGTGGGCCCGAGAGAAGTCGCTCTCTCTCGCCCTCCACATCCCTCTCGGCATTGAGATGACC  
+  
FFF:FFFFFFFFFFFFFFFFFFFF:FFFF,FFFFFFFFFFFFFFFFFFFFFFFFFFFFFFFFFFFFFFFFFFFFFFF  
FFFFFFFFFFFFFFFFFFFFFFFFFFFF:FF,FFFFFFFFFFFFFFFFFFFFFFFFFFFF:FFFFFFFFFFFFFFF:  
@A00155:342:HHGFNDSXY:1:2648:12409:27899 2:N:0:GAACCTAG+TCCGCATA  
CACGGTAGGTCGTGAACAAGCCCGGAGTACATCTCCTTTGGAAGTACTAGGAGACCCCTCCGGTCTTGTCC  
AACCTCTGTTTCGGCAGAGGATACCGTGCTCCACAGCTGTAAGGCTGTGGGCCCGAGAGAAGTCGCTC  
+  
FFFFFFFFFFFFFFFFFFFFFFFFFFFF:FFFFFFFFFFFFFFFFFFFFFFFFFFFFFFFFFFFFFFFFFFFFFFF:  
FFFFFFFFFFFFFFFFFFFFFFFFFFFFFFFFFFFFFFFFFFFFFFFFFFFFFFFFFFFFFFFFFFFFFFFFFFFF:  
@A00155:342:HHGFNDSXY:1:2649:21296:1548 2:N:0:GAACCTAG+TCCGCATA  
CGTTACTCTTCGAGTTGTGTAAGTTTCGTCCTAAAAAGGACTCGTCAGGTAGCCTACTAGACTACGAC  
TTACACGGTAGGTCGTGAACAAGCCCGGAGTACATCTCCTTTGGAAGTACTAGGAGACCCCTCCGGTCTTG  
+  
FFFFFFFFFFFFFFFFFFFFFFFFFFFF,FFFFFFFFFFFFFFFFFFFFFFFFFFFFFFFFFFFFFFFFFFFFFFF:  
FFFFFFFFFFFF:FFFFFFFFFFFFFFFFFFFFFFFFFFFFFFFFFFFFFFFFFFFFFFFFFFFFFFFFFFFFFFF:  
@A00155:342:HHGFNDSXY:1:2649:8956:21762 2:N:0:GAACCTAG+TCCGCATA  
GTTTCGTCCTAAAAAGGACTCGTCAGGTAGCCTACTAGACTACGACTTACACGGTAGGTCGTAAACAA  
GCCCGGAGTACATCTCCTTTGGAAGTACTAGGAGACCCCTCCGGTCTTGTCCAACCTCTGTTTCGGCAGAG  
+  
FFFFFFFFFFFF:FFFFFFFFFFFFFFFFFFFFFFFFFFFFFFFFFFFFFFFFFFFFFFFFFFFFFFFFFFFFFFF,  
FFFFFFFFFFFFF:FFFFFFFFFFFF:F:FFFFFFFFF:FFFFFFFFFFFFFFFFFFFFFFFFFFFF,FFFFF:  
@A00155:342:HHGFNDSXY:1:2649:32922:35399 2:N:0:GAACCTAG+TCCGCATA  
TAGGTCGTGAACAAGCCCGGAGTACATCTCCTTTGGAAGTACTAGGAGACCCCTCCGGTCTTGTCCAACCT  
CTGTTTCGGCAGAGGATACCGTGCTCCACAGCTGTAAGGCTGTGGGCCCGAGAGAAGTCGCTCTCTCT

@A00155:342:HHGFNDSXY:1:2650:32606:21198 2:N:0:GAACCTAG+TCCGCATA  
AGTACATCTCCTTTGGAAGTCTGTTGTCCAACCTCTGTTTCGGCAGAGGATAACC  
GTGCTCCACAGCTGTAAGGCTGTGGGCCCCGAGAGAAGTCGCTCTCTCTCGCCCTCCACATCCCTCTCG  
+  
FFFFFFFFFFFFFFFFFFFFFFFFFFFFFFFFFFFFFFFFFFFFFFFFFFFFFFFFFFFFFFFF:FFFFFFFFFFFFFFF:FFF  
FFFFFFFFFFFFFFFFFFFFFFFFFFFFFFFFFFFFFFFFFFFFFFFFFFFFFFFFFFFFFFFF:FFFFFFFFFFFFFFF,FF  
@A00155:342:HHGFNDSXY:1:2650:12454:35963 2:N:0:GAACCTAG+TCCGCATA  
AAAAGGACTCGTCAGGTAGCCTACTAGACTACGACTTACACGGTAGGTCGTGAACAAGCCCGGAGTAC  
ATCTCCTTTGGAAGTCTGTTGTCCAACCTCTGTTTCGGCAGAGGATAACCGTGCT  
+  
FFFFFFFFFFFFFFFFFFFFFFFFFFFFFFFFFFFFFFFFFFFFFFFFFFFFFFFFFFFFFFFF:FFFFFFFFF,FFFFFFFFF  
FFFFFFF:FFFFFFFFFFFFFFFFFFFFFFFFFFFFFFFFFFFFFFFFFFFFFFFFFFFFFFFFFFFFFFFF:FFFFF  
@A00155:342:HHGFNDSXY:1:2651:10366:2534 2:N:0:GAACCTAG+TCCGCATA  
AGCCCGGAGTACATCTCCTTTGGAAGTCTGTTGTCCAACCTCTGTTTCGGCAGAGGATAACCGTGCTCCACAGCTGTAAGGCTGTGGGCCCCGAGAGAAGTCGCTCTCTCTCGCCCTCTACATC  
+  
FFFFFFFFFFFFFFFFFFFFFFFFFFFFFFFFFFFFFFFFFFFFFFFFFFFFFFFFFFFFFFFF:FFFFFFFFF,FFFFFFFFF  
FFFFFFF:FFFFFFFFFFFFFFFFFFFFFFFFFFFFFFFFFFFFFFFFFFFFFFFFFFFFFFFFFFFFFFFF:FFFFF  
@A00155:342:HHGFNDSXY:1:2651:21920:34726 2:N:0:GAACCTAG+TCCGCATA  
AAAAGGACTCGTCAGGTAGCCTACTAGACTACGACTTACACGGTAGGTCGTGAACAAGCCCGGAGTAC  
ATCTCCTTTGGAAGTCTGTTGTCCAACCTCTGTTTCGGCAGAGGATAACCGTGCT  
+  
FFFFFFFFFFFFFFFFFFFFFFFFFFFFFFFFFFFFFFFFFFFFFFFFFFFFFFFFFFFFFFFF,FFFFFFFFF  
FFFFF:FFFFFFFFF:FFFFFFFFFFFFFFFFF,FFFF:FFFFFFFFF,FFFFFFFFFFFF:,FFFFFFF  
@A00155:342:HHGFNDSXY:1:2652:8404:2832 2:N:0:GAACCTAG+TCCGCATA  
GTTACTCTTCGAGTTGTGTAAGTTTCGTCCTAAAAAGGACTCGTCAGGTAGCCTACTAGACTACGACT  
TACACGGTAGGTCGTGAACAAGCCCGGAGTACATCTCCTTTGGAAGTCTGTTGTCCAACCTCTGTTTCGGCAGAGGATAACCGTGCT  
+  
FFFFFFFFFFFFFFFFFFFFFFFFFFFFFFFFFFFFFFFFFFFFFFFFFFFFFFFFFFFFFFFF,FFFFFFFFF  
FFFFFFFFFFFFF:F:FFFFFFFFFFFFFFFFFFFFFFFFFFFFFFFFFFFFFFFFFFFFFFFFFFFFFFFFFFFFFFFF  
@A00155:342:HHGFNDSXY:1:2652:7039:14716 2:N:0:GAACCTAG+TCCGCATA  
TAGGAGACCCCTCCGGTCTTGTCCAACCTCTGTTTCGGCAGAGGATAACCGTGCTCCACAGCTGTAAGG  
CTGTGGGCCCCGAGAGAAGTCGCTCTCTCTCGCCCTCCACATCCCTCTCGGCATTGAGATGAC  
+  
F:FFFFFFFFFFFFFFFFFFFFFFFFFFFFFFFFFFFFFFFFFFFFFFFFFFFFFFFFFFFFFFFFFFFFFFFFFFFFFFFF  
FFFFFFFFF,FFFF:FFFFFFFFFFFFFFFFF:F:FFFFFFFFFFFFFFFFFFFFFFFFFFFFFFFFFFFFFFFF  
@A00155:342:HHGFNDSXY:1:2652:18267:16470 2:N:0:GAACCTAG+TCCGCATA  
AAAAGGACTCTTCAGGTAGCCTACTAGACTACGACTTACACGGTAGGTCGTGAACAAGCCCGGAGTAC  
ATCTCCTTTGGAAGTCTGTTGTCCAACCTCTGTTTCGGCAGAGGATAACCGTGCT  
+  
FFFFFFFFFFFFFFFFFFFFFFFFFFFFFFFFFFFFFFFFFFFFFFFFFFFFFFFFFFFFFFFF:FFFFFFFFF  
FFFFFFF:FFFFFFFFFFFFFFFFFFFFFFFFFFFFFFFFFFFFFFFFFFFFFFFFFFFFFFFFFFFFFFFF  
@A00155:342:HHGFNDSXY:1:2652:8648:27085 2:N:0:GAACCTAG+TCCGCATA  
CGGACTCATCAGGGAGCCTACTAGACTCCGACCGTCATGGGGGTTCAAACCATGCCCGCCACACCG  
CCTTAGATCAGCTGTGTCCACTTAAGGACTCACCTCTGGCCTATGGTCATCTCAATGCCG  
+  
FFFFFFFFFFFFFFFFFFFFFFFFFFFFFFFFFFFFFFFFFFFFFFFFFFFFFFFFFFFFFFFF:FFFFFFFFF  
FFFFFFFFFFFFFFFFFFFFFFFFFFFFFFFFFFFFFFFFFFFFFFFFFFFFFFFFFFFFFFFF  
@A00155:342:HHGFNDSXY:1:2653:4119:5368 2:N:0:GAACCTAG+TCCGCATA  
GAGACCCCTCCGGTCTTATCCAACCTCTGTTTCGGCAGAGGATAACCGTGCTCCACAGCTGTAAGGCTG  
TGGGCCCCGAGAGAAGTCGCTCTCTCTCGCCCTCCACATCCCTCTCGGCATTGAGATGAC  
+  
FFFFFFFFFFFFFFFFFFFFFFFFFFFFFFFFFFFFFFFFFFFFFFFFFFFFFFFFFFFFFFFF:FFFFFFFFF  
FFFFFFFFF:FFF:,:FFFFFFFFFFFFFFFFFFFFFFFFFFFFFFFFFFFFFFFFFFFFFFFFFFFFFFFF  
FFFFFFFFF:FFF:,:FFFFFFFFFFFFFFFFFFFFFFFFFFFFFFFFFFFFFFFFFFFFFFFFFFFFFFFF



@A00155:342:HHGFNDSXY:1:2653:24867:6355 2:N:0:GAACCTAG+TCCGCATA  
ACTAGGAGACCCCTCCGGTCTTGTCCAACCTCTGTTTCGGCAGAGGATACCGTGCTCCACAGCTGTAA  
GGCTGTGGGCCCAGAGAAGTCGCTCTCTCTCGCCCTCCACATCCCTCTCGGCATTGAGATGAC

[illegible]

@A00155:342:HHGFNDSXY:1:2653:31295:17487 2:N:0:GAACCTAG+TCCGCATA  
TAGGAGACCCCTCCGGTCTTGTCCAACCTCTGTTTCGGCAGAGGATACCGTGCTCCACAGCTGTAAGG  
CTGTGGGCCCAGAGAAGTCGCTCTCTCTCGCCCTCCACATCCCTCTCGGCATTGAGATGACCATAGG

```
FFFFFFFFFFFFFFFFFFFFF,:FFFFFFFFFFFFFFFFFFFFFFFFFFFFFFFFFFFFFFFFFFFFFFFFFFFFFFF  
F:FFFFFFFFFFFFFFFFF:FFFFFFFFFFFFFFFFFFFFFFFFFFFF:F:FFF:FFFFF,FFFFFFFFFFFF:F:
```

@A00155:342:HHGFNDSXY:1:2653:23176:20995 2:N:0:GAACCTAG+TCCGCATA  
GACCCCTCCGGTCTTGTCCAACCTCTGTTTCGGCAGAGGATACCGTGCTCCACAGCTGTAAGGCTGTG  
GGCCCCGAGAGAAGTCGCTCTCTCTCGCCCTCCACATCCCTCTCGGCATTGAGATGACCATAG

[illegible]

@A00155:342:HHGFNDSXY:1:2654:7789:2801 2:N:0:GAACCTAG+TCCGCATA  
GAGACCCCTCCGGTCTTGTCCAACCTCTGTTTCGGCAGAGGATACCGTGCTCCACAGCTGTAAGGCTG  
TGGGCCCCGAGAGAAGTCGCTCTCTCTCGCCCTCTACATCCCTCTCGGCATTGAGATGACCATAGGCC

[illegible]

FFFFFFFFFFFFFFFF:FFFFFFFFFFFFFFFFFFFFFFFFFFFFFFFF:FFFFFFFFFFFFFFFFFFFFFFFFFFFFFFFFFFFFF  
@A00155:342:HHGFNDSXY:1:2654:21965:20807 2:N:0:GAACCTAG+TCCGCATA

AGGACGAAACCGTCGTTACTCTTCGAGTTGTGTAAGTTTCGTCCTAAAAAGGACTCGTCAGGTAGCCT  
ACTAGACTACGACTTACACGGTAGGTCGTGAACAAGCCCGGAGTACATCTCCTTTGGAAGTAGGAGAC  
+

[illegible]

@A00155:342:HHGFNDSXY:1:2654:12057:30107 2:N:0:GAACCTAG+TCCGCATA  
TCTCCTTTGGAAGTACGAGACCCCTCCGGTCTTGTCCAACCTCTGTTTCGGCAGAGGATACCGTGCTC  
CACAGCTGTAAGGCTGTGGGCCCCGAGAGAAGTCGCTCTCTCTCGCCCTCCACATCCCTCTCGGCATTG

[illegible]

```

FFFFFFFFFFFFFFFFFFFFFFFFFFFFFFFFFFFFFFFFFFFFFFFFFFFFFFFFFFFFFFFFFFFFFFFFFFFFFFFF:FF
@A00155:342:HHGFNDSXY:1:2654:10719:30232 2:N:0:GAACCTAG+TCCGCATA

```

TCTCCTTTGGAAGTCTAGGAGACCCCTCCGGTCTTGTCCAACCTCTGTTTCGGCAGAGGATACCGTGCTC  
CACAGCTGTAAGGCTGTGGGCCCGAGAGAAGTCGCTCTCTCTCGCCCTCCACATCCCTCTCGGCATTG

```
+
FFFFFFFF:FFFFFFFFFFFFFFFFFFFFFFFFFFFFFFFFFFFFFFFFFFFFFFFFFFFFFFFF::
```

```
FFFF:F:FFFFFFFF::FFFFFFFF:FFFF:FFFFFFFFFFFF,FFFFFFFFFFFFFFFFFFFFFFFFFFFF:FFF
@A00155:342:HHGFNDSXY:1:2655:11885:2910 2:N:0:GAACCTAG+TCCGCATA
```

TCTCCTTTGGAAGTCTGAGAGACCCCTCCGGTCTTGTCCAACCTCTGTTTCGGCAGAGGATACCGTGCTC  
CACAGCTGTAAGGCTGTGGGCCCCGAGAGAAAGTCGCTCTCTCTCGCCCTCCACATCCCTCTCGGCA

[illegible]

@A00155:342:HHGFND\$XY:1:2655:7627:6339 2:N:0:GAACCTAG+TCCGCATA

GGAGTACATCTCCCTTGGAACTAGGAGACCCCTCCGGCTCTGTCCAACCTCTGTTTCGGCAGAGGATA  
CCGTGCTCCACAGCTGTAAGGCTGTGGGCCCCGAGAGAAGTCGCTCTCTCTCGCCCTCCACATCCCTCT

[illegible]

[illegible]

@A00155:342:HHGFNDSXY:1:2657:12364:29324 2:N:0:GAACCTAG+TCCGCATA  
 GGAGTACATCTCCTTTGGAAGTACGAGACCCCTCCGGTCTTGTCCAACCTCTGTTTCGGCAGAGGATA  
 CCGTGCTCCACAGCTGTAAGGCTGTGGGCCCGAGAGAAGTCGCTCTCTCTCGCCCTCTACATCCCTCT  
 +  
 FFFFFFFFFFFFFFFFFFFFFFFFFFFFFFFFFF:FFFFFFFFFFFFFFFFFFFFFFFFFFFFFFFFFFFFFFFF:FFFFF  
 FFFFFFFFFFFFFFFFFFFFFFFFFFFFFFFFFF:FFFFFFFFFFFFFFFFFFFFFFFFFFFFFFFFFFFFFFFF:FFFFF  
 @A00155:342:HHGFNDSXY:1:2658:30906:13839 2:N:0:GAACCTAG+TCCGCATA  
 ACCGTGCTCCACAGCTGTAAGGCTGTGGGCCCGAGAGAAGTCGCTCTCTCTCGCCCTTCACATCCCTC  
 TCGGCATTGAGATGACCATAGGCCAGAGGTGAGTCCTTAAGTGGACACAGCTGATCTAAGGCGGTGTG  
 +  
 :FFFFFFFFFFFFFFFFFFFFFFFFFFFF,FFFFFFFFFFFFFFFF:FFFFFFFFFFFF,FFFFFFFFFFFFFFFFFFFFF  
 FFFFFF,FFFFFFFFFFFFFFFFFFFFFFFFFFFFFFFFFFFF,F,FFFFFFFF:FFFFFFFFFFFFFFFFFFFF,F  
 @A00155:342:HHGFNDSXY:1:2658:19199:31297 2:N:0:GAACCTAG+TCCGCATA  
 GGACTCGTCAGGTAGCCTACTAGACTACGACTTACACGCTAGGTCTGTAACAAGCCCGGAGTACATCT  
 CCTTTGGAAGTACGAGACCCCTCCGGTCTTGTCCAACCTCTGTTTCGGCAGAGGATAACCGTGCTCCAC  
 +  
 FFFFFFFFFFFFFFFFFFFFFFFFFFFFFFFFFF:FFFFFFFFFFFFFFFFFFFFFFFFFFFFFFFFFFFFFFFF:FFFFF  
 FFFFFFFFF:FFFFFFFFFFFF:FFFFFFFFFFFFFFFF:FFFFFFFFFFFFFFFFFFFFFFFFFFFFFFFFFFFFF  
 @A00155:342:HHGFNDSXY:1:2658:18665:36448 2:N:0:GAACCTAG+TCCGCATA  
 CGCCTTAGATCAGCTGTGTCCACTTAAGGACTCACCTCTGGCCTATGGTCATCTCAATGCCGAGAGGG  
 ATGTGAAGGGCGAGAGAGAGCGACTTCTCTCGGGCCACAGCCTTACAGCTGTGGAGCACGGTATCCT  
 +  
 FFFFFFFFFFFFFFFFFFFFFFFFFFFFFFFFFF:FFFFFFFFFFFFFFFFFFFFFFFFFFFFFFFFFFFFFFFF:FFFFF  
 :FFFFFFFFFFFFFFFFFFFFFFFFFFFFFFFFFFFFFFFFFFFF,FFFFFFFFFFFFFFFFFFFFFFFFFFFFF  
 @A00155:342:HHGFNDSXY:1:2659:21522:7921 2:N:0:GAACCTAG+TCCGCATA  
 ACCGCCTTAGATCAGCTGTGTCCACTTAAGGACTCACCTCTGGCCTATGGTCATCTCAATGCCGAGAG  
 GGATGTAGAGGGCGAGAGAGAGCGACTTCTCTCGGGCCACAGCCTTACAGCTGTGGAGCACGGTATC  
 +  
 FFFFFFFFFFFF:FFFFFFFFFFFFFFFFFFFFFFFFFFFFFFFFFFFFFFFFFFFF,FFFFFFFFFFFFFFFFFFFFF,F  
 FF,FF:FFFF:FFFFFFFFFFFFFFFFFFFFFFFFFFFFFFFFFFFFFFFFFFFF:FFFFFFFFFFFFFFFFFFFF:FF  
 @A00155:342:HHGFNDSXY:1:2659:1976:18505 2:N:0:GAACCTAG+TCCGCATA  
 GGAGTACATCTCCTTTGGAAGTACGAGACCCCTCCGGTCTTGTCCAACCTCTGTTTCGGCAGAGGATA  
 CCGTGCTCCACAGCTGTAAGGCTGTGGGCCCGAGAGAAGTCGCTCTCTCTCGCCCTCCACATCCCTCT  
 +  
 FFFFF:FFFFFFFFFFFFFFFFFFFFFFFFFFFFFFFFFFFF:FFFFFFFFFFFFFFFFFFFFFFFFFFFFFFFFFFFFF  
 FFFFFFFFFFFFFFFFFFFFFFFFFFFFFFFFFF:FFFFFFFFFFFFFFFFFFFFFFFFFFFFFFFFFFFFF  
 @A00155:342:HHGFNDSXY:1:2659:22742:28855 2:N:0:GAACCTAG+TCCGCATA  
 AGCCCGGAGTACATCTCCTTTGGAAGTACGAGACCCCTCCGGTCTTGTCCAACCTCTGTTTCGGCAGA  
 GGATACCGTGCTCCACAGCTGTAAGGCTGTGGGCCCGAGAGAAGTCGCTCTCTCTCGCCCTCTACATC  
 +  
 FFFFFFFFFFFFFFFFFFFFFFFFFFFFFFFFFF:FFFFFFFFFFFFFFFFFFFFFFFFFFFFFFFFFFFFFFFF:FFFFF  
 FFFFFFFFFFFFFFFFFFFFFFFFFFFFFFFFFF:FFFFFFFFFFFFFFFFFFFFFFFFFFFFFFFFFFFFF,FFFFF  
 @A00155:342:HHGFNDSXY:1:2659:4869:31469 2:N:0:GAACCTAG+TCCGCATA  
 CGTTACTCTTCGAGTTGTGTAAGTTTCGTCTAAAGGACTCGTCAGGTAGCCTACTAGACTACGAC  
 TTACACGGTAGGTCTGTAACAAGCCCGGAGTACATCTCCTTTGGAAGTACGAGACCCCTCCGGTCTTG  
 +  
 FFFFFFFFFFFFFFFFFFFFFFFFFFFFFF:FFFFF:FF:FFFFFFFFFFFFFFFF:FFFFFFFFFFFFFFFFFFFFF  
 FFFFFFFFFFFFFF:FFFFFFFFFFFFFFFFFFFFFFFFFFFFFFFFFFFFF:FFFFFFFFFFFFFFFFFFFFF:FF  
 @A00155:342:HHGFNDSXY:1:2659:31403:35712 2:N:0:GAACCTAG+TCCGCATA  
 AAAAGGACTCGTCAGGTAGCCTACTAGACTACGACTTACACGGTAGGTCTGTAACAAGCCCGGAGTAC  
 ATCTCCTTTGGAACCAGGAGACCCCTCCGGTCTTGTCCAACCTCTGTTTCGGCAGAGGATAACCGTGCT  
 +  
 FFFFFFFFFFFFFFFFFFFFFFFFFFFFFFFFFF:FFFFFFFFFFFFFFFFFFFFFFFFFFFFFFFFFFFFFFFF:FFFFF  
 FFFFFFFFFFFFFFFFFFFFFFFFFFFFFFFFFF:FFFFFFFFFFFFFFFFFFFFFFFFFFFFFFFFFFFFF:FFFFF  
 @A00155:342:HHGFNDSXY:1:2659:31403:35712 2:N:0:GAACCTAG+TCCGCATA  
 AAAAGGACTCGTCAGGTAGCCTACTAGACTACGACTTACACGGTAGGTCTGTAACAAGCCCGGAGTAC  
 ATCTCCTTTGGAACCAGGAGACCCCTCCGGTCTTGTCCAACCTCTGTTTCGGCAGAGGATAACCGTGCT  
 +  
 FFFFFFFFFFFFFFFFFFFFFFFFFFFFFFFFFF:FFFFFFFFFFFFFFFFFFFFFFFFFFFFFFFFFFFFFFFF:FFFFF  
 FFFFFFFFFFFFFFFFFFFFFFFFFFFFFFFFFF:FFFFFFFFFFFFFFFFFFFFFFFFFFFFFFFFFFFFF:FFFFF

[illegible]

@A00155:342:HHGFNDSXY:1:2662:10773:21590 2:N:0:GAACCTAG+TCCGCATA  
ACGAAACCGTCGTACTCTTCGAGTTGTGTAAGTTTTCGTCCTAAAAAGGACTCGTCAGGTAGCCTACT  
AGACTACGACTTACACGGTAGGTCGTGAACAAGCCCCGAGTACATCTCCTTTGGAAGTACGAGACCCC  
+  
FFFFFFFFFFFFFFFFFFFFFFFFFFFFFFFFFFFFF:FFFFFFFFFFFFFF:F:FFFFFFFFFFFFFFFFFFFFFFFFF  
FFFFFFFFFFFFFFFFFFFFFFFFFFFFFFFFFFFFFFFFFFFFFFFFFFFFFFFFFFFFFFFFFFFFFFFFFFFFF  
@A00155:342:HHGFNDSXY:1:2662:9796:24283 2:N:0:GAACCTAG+TCCGCATA  
GCTACCTGACGAGTCCTTTTAGGACGAACTTACACAACCTCAAAGAGTAACGACGGTTTTCGTCCTTG  
GAACGGACTIONCATCAGGGAGCCTACTAGACTCCGACCCTCATGGGGGTTCAAACCCATGC  
+  
FFFFFFFFFFFFFFFFFFFFFFFFFFFFFFFFFFFFF:FFFFFFFFF:FFFFFFFFFFFFFFFFFFFFFFFFFFFFFFFFF  
FFFFFFFFFFFFFFFFFFFFFFFFFFFFFFFFFFFFFFFFFFFFFFFFFFFFFFFFFFFFFFFFFFFFFFFFFFFFF  
@A00155:342:HHGFNDSXY:1:2663:12608:21887 2:N:0:GAACCTAG+TCCGCATA  
CCTACTAGACTACGACTTACACGGTAGGTCGTGAACAAGCCCCGAGTACATCTCCTTTGGAACAGGA  
GACCCCTCCGGTCTTGTCCAACCTCTGTTTCGGCAGAGGATACCGTGCTCCACAGCTGTAAGGCTGTG  
+  
FFFFFFFFFFFFFFFFFFFFFFFFFFFFFFFFFFFFF,FFFFFFFFFFFFFFFFFFFFFFFFFFFFFFFFFFFFF:  
FF:FFFFFFFFFFF,FFFFFFFFF:FFFFFFFFFFF:,FFFFFFFFFFFFFFFFFFFFFFFFFFFFFFFFFFFFF  
@A00155:342:HHGFNDSXY:1:2663:13232:26537 2:N:0:GAACCTAG+TCCGCATA  
AGGACGAAACCGTCGTACTCTTGGAGTTGTGTAAGTTTCGTCTCTAAAAGGACTCGTCAGGTAGCCT  
ACTAGACTACGACTTACACGGTAGGTCGTGAACAAGCCCCGAGTACATCTCCTTTGGAAGTACGAGAC  
+  
FFFFFFFFFFFFFFFFFFFFFFFFFFFFFFFFFFFFFFFFFFFFFFFFFFFFFFFFFFFFFFFFFFFFFFFFFFFFF:  
FFFFFFFFFFFFFFFFFFFFFFFFFFFFFFFFFFFFFFFFFFFFFFFFFFFFFFFFFFFFFFFFFFFFFFFFFFFFF  
@A00155:342:HHGFNDSXY:1:2663:5656:32487 2:N:0:GAACCTAG+TCCGCATA  
GCAGAGGATACCGTGCTCCACAGCTGTAAGGCTGTGGGCCCGAGAGAAGTCGCTCTCTCTCGCCCTTC  
ACATCCCTCTCGGCATTGAGATGACCATAGGCCAGAGGTGAGTCCTTAAGTGACACAGCTG  
+  
FFFFFFFFFFFFFFFFFFFFFFFFFFFFFFFFFFFFFFFFFFFFFFFFFFFFFFFFFFFFFFFFFFFFFFFFFFFFF:  
FFFFFFFFFFFFFFFFF:FFFFFFFFFFFFFFFFFFFFFFFFFFFFFFFFFFFFFFFFFFFFFFFFFFFFFFFFFFFF  
@A00155:342:HHGFNDSXY:1:2664:11143:18975 2:N:0:GAACCTAG+TCCGCATA  
CTCCTTTGGAAGTACGAGACCCCTCCGGTCTTGTCCAACCTCTGTTTCGGCAGAGGATACCGTGCTCC  
ACAGCTGTAAGGCTGTGGGCCCGAGAGAAGTCGCTCTCTCTCGCCCTCCACATCCCTCTCGGCATTGA  
+  
FFFFFFFFFFFFFFFFFFFFFFFFFFFFFFFFFFFFFFFFFFFFFFFFFFFFFFFFFFFFFFFFFFFFFFFFFFFFF:  
FFFFFFFFFFFFFFFFFFFFFFFFFFFFFFFFFFFFFFFFFFFFFFFFFFFFFFFFFFFFFFFFFFFFFFFFFFFFF  
@A00155:342:HHGFNDSXY:1:2665:4535:17863 2:N:0:GAACCTAG+TCCGCATA  
TGTAAGTTTTCGTCCTAAAAGGACTCGTCAGGTAGCCTACTAGACTACGACTTACACGGTAGGTCGTG  
AACCAAGCCCCGAGTACATCTCCTTTGGAAGTACGAGACCCCTCCGGTCTTGTCCAACCTCTGTTTCGG  
+  
FFFFFFFFFFFFFFF:FFFFFFFFF:FFFFFFFFFFFFFFFFFFFFFFFFFFFFFFFFFFFFFFFFFFFFFFFFFFFFF  
FFFFFFFFFFF,FFFFFFFFFFFFFFFFFFFFFFFFFFFFFFFFFFFFFFFFFFFFFFFFFFFFFFFFFFFFFFFFFFFFF:  
FFFFF:FFFFFFFFFFFFFF:FFFFFFFFF  
@A00155:342:HHGFNDSXY:1:2665:2537:18693 2:N:0:GAACCTAG+TCCGCATA  
ACGAAACCGTCGTACTCTTCGAGTTGTGTAAGTTTCGTCTCTAAAAGGACTCGTCAGGTAGCCTACT  
AGACTACGACTTACACGGTAGGTCGTGAACAAGTCCGGAGTACATCTCCTTTGGAAGTACGAGACCCC  
+  
FFFFFFFFFFFFFFFFFFFFFFFFFFFFFFFFFFFFF,FFFFFFFFFFFFFFFFFFFFFFFFFFFFFFFFFFFFF:  
FFFFF:FFFFFFFFFFFFFFFFFFFFFFFFFFFFFFFFFFFFF  
@A00155:342:HHGFNDSXY:1:2666:15004:4993 2:N:0:GAACCTAG+TCCGCATA  
CCTTTGGAAGTACGAGACCCCTCCGGTCTTGTCCAACCTCTGTTTCGGCAGAGGATACCGTGCTCCAC  
AGCTGTAAGGCTGTGGGCCCGAGAGAAGTCGCTCTCTCTCGCCCTCTACATCCCTCTCGGCATTGAGA  
+

XXXXXXXXXXXXXXXXXXXXXXXXXXXXX

@A00155:342:HHGFNDSXY:1:2666:10203:18161 2:N:0:GAACCTAG+TCCGCATA  
GTACTCCGGGCTTGTTCA  
+  
FFFFFFFFFFFFFFFFFFFF  
@A00155:342:HHGFNDSXY:1:2666:1579:23547 2:N:0:GAACCTAG+TCCGCATA  
GGAGTACATCTCCTTTGGAAGTACAGACCCCTCCGGTCTTGTCCAACCTCTGTTTCGGCAGAGGATA  
CCGTGCTCCACAGCTGTAAGGCTGTGGGCCCCGAGAGAAGTCGCTCTCTCTCGCCCTCCACATCCCTCT  
+  
FFFFFFFFFFFFFFFF:FFFFFFFFFFFFFFFFFFFFFFFFFFFFFFFFFFFFFFFFFFFFFFFFFFFFFFFFFFFFFFFF  
FFFFFFFFFFFFFFFFFFFFFFFFFFFFFFFFFFFFFFFFFFFFFFFFFFFFFFFFFFFFFFFFFFFFFFFFFFFFFFFF  
@A00155:342:HHGFNDSXY:1:2667:21323:14340 2:N:0:GAACCTAG+TCCGCATA  
CTCCGACCGTCATGGGGGTTCAAACCCATGCCCCACCACACCGCCTTAGATCAGCTGTGTCCACTTAA  
GGACTCACCTCTGGCCTATGGTCATCTCAATGCCGAGAGGGATGTGGAGGGCGAGAGAGAGCGAC  
+  
FFFFFFFFFFFFFFFFFFFFFFFFFFFFFFFFFFFFFFFFFFFFFFFFFFFFFFFFFFFFFFFFFFFFFFFFFFFFFFFF  
FFFFFFFFFFFFFFFFFFFFFFFFFFFFFFFFFFFFFFFFFFFFFFFFFFFFFFFFFFFFFFFFFFFFFFFFFFFFFFFF  
@A00155:342:HHGFNDSXY:1:2667:3848:32174 2:N:0:GAACCTAG+TCCGCATA  
AGGACGAAACCGTCGTTACTCTTCGAGTTGTGTAAGTTTCGTCCTAAAAAGGACTCGTCAGGTAGCCT  
ACTAGACTACGACTTACACGGTAGGTCGTGAACAAGCCCGAGTACATCTCCTTTGGAAGTACAGGAGAC  
+  
FFFFFFFFFFFFFFFFFFFFFFFFFFFFFFFFFFFFFFFFFFFFFFFFFFFFFFFFFFFFFFFFFFFFFFFFFFFFFFFF  
FFFFFFFFFFFFFFFFFFFFFFFFFFFFFFFFFFFFFFFFFFFFFFFFFFFFFFFFFFFFFFFFFFFFFFFFFFFFFFFF  
@A00155:342:HHGFNDSXY:1:2668:6117:4131 2:N:0:GAACCTAG+TCCGCATA  
CCTACTAGACTACGACTTACACGGTAGGTCGTGAACAAGCCCGAGTACATCTCCTTTGGAACCAGGA  
GACCCCTCCGGTCTTGTCCAACCTCTGTTTCGGCAGAGGATACCGTGCTCCACAGCTGTAAGGCTGTG  
+  
FFFFFFFFFFFFFFFFFFFFFFFFFFFFFFFFFFFFFFFFFFFFFFFFFFFFFFFFFFFFFFFFFFFFFFFFFFFFFFFF  
FFFFFFFFFFFFFFFFFFFFFFFFFFFFFFFFFFFFFFFFFFFFFFFFFFFFFFFFFFFFFFFFFFFFFFFFFFFFFFFF  
@A00155:342:HHGFNDSXY:1:2668:2953:7326 2:N:0:GAACCTAG+TCCGCATA  
GTTGTGTAAGTTTCGTCCTAAAAAGGACTCGTCAGGTAGCCTACTAGACTACGACTTACACGGTAGGT  
CGTGAACAAGCCCGAGTACATCTCCTTTGGAAGTACAGGAGACCCCTCCGGTCTTGTCCAACCTCTGTT  
+  
FFFFFFFFFFFFFFFFFFFFFFFFFFFFFFFFFFFFFFFFFFFFFFFFFFFFFFFFFFFFFFFFFFFFFFFFFFFFFFFF  
FFFFFFFFFFFFFFFFFFFFFFFFFFFFFFFFFFFFFFFFFFFFFFFFFFFFFFFFFFFFFFFFFFFFFFFFFFFFFFFF  
@A00155:342:HHGFNDSXY:1:2668:21251:14716 2:N:0:GAACCTAG+TCCGCATA  
GGACTCGTCAGGTAGCCTACTAGACTACGACTTACACGGTAGGTCGTGAACAAGCCCGAGTATATCT  
CCTTTGGAAGTACAGGAGACCCCTCCGGTCTTGTCCAACCTCTGTTTCGGCAGAGGATACCGTGCTCCAC  
+  
FFFFFFFFFFFFFFFFFFFFFFFFFFFFFFFFFFFFFFFFFFFFFFFFFFFFFFFFFFFFFFFFFFFFFFFFFFFFFFFF  
FFFFFFFFFFFFFFFFFFFFFFFFFFFFFFFFFFFFFFFFFFFFFFFFFFFFFFFFFFFFFFFFFFFFFFFFFFFFFFFF  
@A00155:342:HHGFNDSXY:1:2668:19931:27680 2:N:0:GAACCTAG+TCCGCATA  
TGTGTAAGTTTCGTCCGAAAAAGGACTCGTCAGGTAGCCTACTAGACTACGACTTACACGGTAGGTG  
TGAACAAGCCCGAGTACATCTCCTTTGGAAGTACAGGAGACCCCTCCGGTCTTGTCCAACCTCTGTTTC  
+  
:,F:FFFF,FFFFFFFF,FFFFFFFFFFFFFFFF:FFFF:FFFFFFFF:FFFFFFFF:FFFFFFFF:FFFFF  
FF,FFFFFFFFFFFFFFFF:FF:FFFFFFFFFFFFFFFF:FFFF:FFFF,FFFFFFFF  
@A00155:342:HHGFNDSXY:1:2668:11071:32972 2:N:0:GAACCTAG+TCCGCATA  
GACCCCTCCGGTCTTGTCCAACCTCTGTTTCGGCAGAGGATACCGTGCTCCACAGCTGTAAGGCTGTG  
GGCCCCGAGAGAAGTCGCTCTCTCTCGCCCTCCACATCCCTCTCGGCATTGAGATGACCATAGGC  
+  
FFFFFFFFFFFFFFFFFFFFFFFFFFFFFFFFFFFFFFFFFFFFFFFFFFFFFFFFFFFFFFFFFFFFFFFFFFFFFFFF  
FFFFFFFFFFFFFFFFFFFFFFFFFFFFFFFFFFFFFFFFFFFFFFFFFFFFFFFFFFFFFFFFFFFFFFFFFFFFFFFF  
@A00155:342:HHGFNDSXY:1:2669:3115:8641 2:N:0:GAACCTAG+TCCGCATA  
TTTCGTCCTAAAAAGGACTCGTCAGGTAGCCTACTAGACTACGACTTACACGGTAGGTCGTGAACAAG

CCGGAGTACATCTCCTTTGGAAGTACAGGAGACCCCTCCGGTCTTGTCCAACCTCTGTTTCGGCAGAGG  
+  
FFFF:FFFFFFFFFFFFFFFFFFFFFFFF:FFFFFFFFFFFF:FFFFFFFFFFFF:F,FFFFFFFFFFFF:FFF  
FFFFFFFFFFFFFFFFFFFFFFFFFFFFFFFFFFFFFFFFFFFFFFFFFFFFFFFFFFFFFFFFFFFFFFFF  
@A00155:342:HHGFNDSXY:1:2669:23701:12132 2:N:0:GAACCTAG+TCCGCATA  
TACGACTTACACGGTAGGTCGTGAACAAGCCCGGAGTACATCTCCTTTGGAAGTACAGGAGACCCCTCCG  
GTCTTGTCCAACCTCTGTTTCGGCAGAGGATACCGTGCTCCACAGTTGTAAGGCTGTGGGCCCG  
+  
FFFFFFFFFFFFFFFFFFFFFFFFFFFFFFFFFFFFFFFFFFFFFFFFFFFFFFFFFFFFFFFFFFFFFFFF:FFFF,FFFFFFFFFFFFFFFF  
FFFFFFFFFFFFFFFFFFFFFFFFFFFFFFFFFFFFFFFFFFFFFFFFFFFFFFFFFFFFFFFFFFFFFFFF  
@A00155:342:HHGFNDSXY:1:2669:3595:15890 2:N:0:GAACCTAG+TCCGCATA  
AAAAGGACTCGTCAGGTAGCCTACTAGACTACGACTTACACGGTAGGTCGTGAACAAGCCCGGAGTAC  
ATCTCCTTTGGAACCAGGAGACCCCTCCGGTCTTGTCCAACCTCTGTTTCGGCAGAGGATACCGTGCT  
+  
FFFFFFFFFFFFFFFFFFFFFFFFFFFFFFFFFFFFFFFFFFFFFFFFFFFFFFFFFFFFFFFFFFFFFFFF:FFFF,FFFFFFFFFFFFFFFF  
FFFFFFFFFFFFFFFFFFFFFFFFFFFFFFFFFFFFFFFFFFFFFFFFFFFFFFFFFFFFFFFFFFFFFFFF  
@A00155:342:HHGFNDSXY:1:2669:28004:21903 2:N:0:GAACCTAG+TCCGCATA  
AACTAGGAGACCCCTCCGGTCTTGTCCAACCTCTGTTTCGGCAGAGGATACCGTGCTCCACAGCTGTA  
AGGCTGTGGGCCCGAGAGAAGTCGCTCTCTCGCCCTCCACATCCCTCTCGGCATTGAGATGACCAT  
+  
FFFFFFFFFFFFFFFFFFFFFFFFFFFFFFFFFFFFFFFFFFFFFFFFFFFFFFFFFFFFFFFFFFFFFFFF:FFFF,FFFFFFFFFFFFFFFF  
FFFFFFFFFFFFFFFFFFFFFFFFFFFFFFFFFFFFFFFFFFFFFFFFFFFFFFFFFFFFFFFFFFFFFFFF  
@A00155:342:HHGFNDSXY:1:2669:20826:22623 2:N:0:GAACCTAG+TCCGCATA  
GCCTACTAGACTACGACTTACACGGTAGGTCGTGAACAAGCCCGGAGTACATCTCCTTTGGAAGTACAGG  
AGACCCCTCCGGTCTTGTCCAACCTCTGTTTCGGCAGAGGATACCGTGCTCCACAGCTGTAAGGCTGT  
+  
FFFFFFFFFFFFFFFFFFFFFFFFFFFFFFFFFFFFFFFFFFFFFFFFFFFFFFFFFFFFFFFFFFFFFFFF:FFFF,FFFFFFFFFFFFFFFF  
FFFFFFFFFFFFFFFFFFFFFFFFFFFFFFFFFFFFFFFFFFFFFFFFFFFFFFFFFFFFFFFFFFFFFFFF  
@A00155:342:HHGFNDSXY:1:2669:31439:25379 2:N:0:GAACCTAG+TCCGCATA  
GAAACCGTCGTTACTCTTTGAGTTGTGTAAGTTTCGTCCTAAAAAGGACTCGTCAGGTAGCCTACTAG  
ACTACGACTTACACGGTAGGTCGTGAACAAGCCCGGAGTACATCTCCTTTGGAAGTACAGGAGACCCCTC  
+  
FFFFFFFF,FFFFFF:F,,FFFFFFFF:FFF:F,FFFF,,FFFFFFFFFFFFFFFF:FFFFFFFF,FFFF  
FFF:FFFFFFFFFFFFFFFF,FFFFFFFFFFFFFFFF:FFFFFFFFFFFFFF:FFFFFFFFFFFFFFFF  
@A00155:342:HHGFNDSXY:1:2670:9173:1313 2:N:0:GAACCTAG+TCCGCATA  
CACGGTAGGTCGTGAACAAGCCCGGAGTACATCTCCTTTGGAAGTACAGGAGACCCCTCCGGTCTTGTCC  
AACCTCTGTTTCGGCAGAGGATACCGTGCTCCACAGCTGTAAGGCTGTGGGCCCGAGAGAAGTCGCTC  
+  
FFFFFFFFFFFFFFFFFFFFFFFFFFFFFFFFFFFFFFFFFFFFFFFFFFFFFFFFFFFFFFFFFFFFFFFF:FFFF,FFFFFFFF  
FFFFFFFFFFFFFFFFFFFFFFFFFFFFFFFFFFFFFFFFFFFFFFFFFFFFFFFFFFFFFFFFFFFFFFFF  
@A00155:342:HHGFNDSXY:1:2670:29658:5603 2:N:0:GAACCTAG+TCCGCATA  
TACACGGTAGGTCGTGAACAAGCCCGGAGTACATCTCCTTTGGAAGTACAGGAGACCCCTCCGGTCTTGT  
CCAACCTCTGTTTCGGCAGAGGATACCGTGCTCCACAGCTGTAAGGCTGTGGGCCCGAGAGAAGTCGC  
+  
FFFFFFFFFFFFFFFFFFFFFFFFFFFFFFFFFFFFFFFFFFFFFFFFFFFFFFFFFFFFFFFFFFFFFFFF:FFFF,FFFFFFFF  
FFFFFFFFFFFFFFFFFFFFFFFFFFFFFFFFFFFFFFFFFFFFFFFFFFFFFFFFFFFFFFFFFFFFFFFF  
@A00155:342:HHGFNDSXY:1:2670:9019:8469 2:N:0:GAACCTAG+TCCGCATA  
ACCTCTGTTTCGGCAGAGGATACCGTGCTCCACAGCTGTAAGGCTGTGGGCCCGAGAGAAGTCGCTCT  
CTCTCGCCCTCCACATCCCTCTCGGCATTGAGATGACCATAGGCCAGAGGTGAGTCCTTAAGTGGACA  
+  
FFFFFFFFFFFFFFFFFFFFFFFFFFFFFFFFFFFFFFFFFFFFFFFFFFFFFFFFFFFFFFFFFFFFFFFF:FFFF,FFFFFFFF  
FFFFFFFFFFFFFFFFFFFFFFFFFFFFFFFFFFFFFFFFFFFFFFFFFFFFFFFFFFFFFFFFFFFFFFFF  
@A00155:342:HHGFNDSXY:1:2670:17463:9126 2:N:0:GAACCTAG+TCCGCATA  
AAAAGGACTCGTCAGGTAGCCTACTAGACTACGACTTACACGGTAGGTCGTGAACAAGCCCGGAGTAC

ATCTCCTTTGGAACGAGAGACCCCTCCGGTCTTGTC AACCTCTGTTTCGGCAGAGGATAACCGTGCT  
+  
FFFFFFFFFFFFFFFFFFFFFFFFFFFFFFFFFFFFF, FFFFFFFF: FFFFFFFFFFFFFFFFFFFFFFFFFFFFFF: FFFF  
FFFFFFFFFFFFFFFFFFFFFFFFFFFFFFFFFFFFF: FFFFFFFF: FFFFFFFFFFFFFFFFFFFFFFFFFFFFFF: FFFFFFFF  
@A00155:342:HHGFNDSXY:1:2670:5005:31767 2:N:0:GAACCTAG+TCCGCATA  
CTTACACGGTAGGTCTGTGAACAAGCCCGGAGTACATCTCCTTTGGA ACTAGGAGACCCCTCCGGTCTT  
GTCCAACCTCTGTTTCGGCAGAGGATAACCGTGCTCCACAGCTGTAAGGCTGTGGGCCCGAGAGAAGTC  
+  
FFFFFFFFFFFFFFF: FFFFFFFFFFFFFFFFFFFFFFFFFFFFFFFFFFFFFF: FFF, FFFFFFFFFFFFFFFFFFFFF  
FFFFFFFFFFFFFFFFFFFFFFFFFFFFFFFFFFFFF, FFFFFFFFFFFFFFFFFFFFFFFFFFFFFFFFFFFFFF  
@A00155:342:HHGFNDSXY:1:2670:27679:36558 2:N:0:GAACCTAG+TCCGCATA  
CAAGGACGAAACCGTCGTTACTCTTCGAGTTGTGTAAGTTTCGTCCTAAAAAGGACTCGTCAGGTAGC  
CTACTAGACTACGACTTACACGGTAGGTCTGTGAACAAGCCCGGAGTACATCTCCTTTGGA ACTAGGAG  
+  
FFFFFFFFFFFFFFFFFFFFFFFFFFFFFFFFFFFFFFFFFFFFFFFFFFFFFFFFFFFFFFFFFFFFFFFFFFFFFFFFFFFF  
FFFFFFFFFFFFFFFFFFFFFFFFFFFFFFFFFFFFFFFFFFFFFFFFFFFFFFFFFFFFFFFFFFFFFFFFFFFFFFFFFFFF  
@A00155:342:HHGFNDSXY:1:2671:26124:9972 2:N:0:GAACCTAG+TCCGCATA  
CTAAAAAGGACTCGTAAGGTAGCCTACTAGACTACGACTTACACGGTAGGTCTGTGAACAAGCCCGGAG  
TACATCTCCTTTGGA ACTAGGAGACCCCTCCGGTCTTGTCCAACCTCTGTTTCGGCAGAGGATAACCGT  
+  
FFFFFFFFFFFFFFFFFFFFFFFFFFFFFFFFFFFFFFFFFFFFFFFFFFFFFFFFFFFFFFFFFFFFFFFFFFFFFFFFFFFF  
FFFFFFFFFFFFF: FFFFFFFFFFFFFFFFFFFFFFFFFFFFFFFFFFFFFFFFFFFFFFFFFFFFFFFFFFFFFFFFFFFFF  
@A00155:342:HHGFNDSXY:1:2671:18575:34381 2:N:0:GAACCTAG+TCCGCATA  
CAAGGACGAAACCGTCGTTACTCTTCGAGTTGTGTAAGTTTCGTCCTAAAAAGGACTCGTCAGGTAGC  
CTACTAGACTACGACTTACACGGTAGGTCTGTGAACAAGCCCGGAGTACATCTCCTTTGGA ACTAGGAG  
+  
FFFFFFFFFFFFFFFFFFFFFFFFFFFFFFFFFFFFFFFFFFFFFFFFFFFFFFFFFFFFFFFFFFFFFFFFFFFFFFFFFFFF  
FFFFFFFFFFFFFFFFFFFFFFFFFFFFFFFFFFFFFFFFFFFFFFFFFFFFFFFFFFFFFFFFFFFFFFFFFFFFFFFFFFFF  
@A00155:342:HHGFNDSXY:1:2672:14199:19789 2:N:0:GAACCTAG+TCCGCATA  
GGAGTACATCTCCTTTGGA ACTAGGAGACCCCTCCGGTCTTGTCCAACCTCTGTTTCGGCAGAGGATA  
CCGTGCTCCACAGCTGTAAGGCTGTGGGCCCGAGAGAAGTCGCTCTCTCTCGCCCTCCACATCCCTCG  
+  
FFFFFFFFFFFFFFFFFFFFFFFFFFFFFFFFFFFFFFFFFFFFFFFFFFFFFFFFFFFFFFFFFFFFFFFFFFFFFFFFFFFF  
FFFFFFFFFFFFFFFFFFFFFFFFFFFFFFFFFFFFFFFFFFFFFFFFFFFFFFFFFFFFFFFFFFFFFFFFFFFFFFFFFFFF  
@A00155:342:HHGFNDSXY:1:2672:20121:23907 2:N:0:GAACCTAG+TCCGCATA  
GTGAACAAGCCCGGAGTACATCTCCTTTGGA ACTAGGAGACCCCTCCGGTCTTGTCCAACCTCTGTTT  
CGGCAGAGGATAACCGTGCCCCACAGCTGTAAGGCTGTGGGCCCGAGAGAAGTCGCTCTCTCTCGCCCT  
+  
FFFFFFFFFFFFFFFFFFFFFFFFFFFFFFFFFFFFFFFFFFFFFFFFFFFFFFFFFFFFFFFFFFFFFFFFFFFFFFFFFFFF  
FFFFFFFFFFFFFFFFFFFFFFFFFFFFFFFFFFFFFFFFFFFFFFFFFFFFFFFFFFFFFFFFFFFFFFFFFFFFFFFFFFFF  
@A00155:342:HHGFNDSXY:1:2672:14290:28463 2:N:0:GAACCTAG+TCCGCATA  
AGGGAGCCTACTAGACTCCGACC GTCATGGGGGTTCAAACCCATGCCCGCCACACCGCCTTAGATCA  
GCTGTGTCCACTTAAGGACTCACCTCTGGCCTATGGTCATCTCAATGCCGAGAGGGATGTGGAGGGCG  
+  
FFFFFFFFFFFFFFFFFFFFFFFFFFFFFFFFFFFFFFFFFFFFFFFFFFFFFFFFFFFFFFFFFFFFFFFFFFFFFFFFFFFF  
FFFFFFFFFFFFFFFFFFFFFFFFFFFFFFFFFFFFFFFFFFFFFFFFFFFFFFFFFFFFFFFFFFFFFFFFFFFFFFFFFFFF  
@A00155:342:HHGFNDSXY:1:2672:25771:31626 2:N:0:GAACCTAG+TCCGCATA  
AAGGACGAAACCGTCGTTACTCTTCGAGTAGTGTAAGTTTCGTCCTAAAAAGGACTCGTCAGGTAGCC  
TACTAGACTACGACTTACACGGTAGGTCTGTGAACAAGCCCGGAGTACATCTCCTTTGGA ACTAGGAGA  
+  
FFFFFFFFFFFFFFFFFFFFFFFFFFFFFFFFFFFFFFFFFFFFFFFFFFFFFFFFFFFFFFFFFFFFFFFFFFFFFFFFFFFF  
FFFFFFFFFFFFFFFFFFFFFFFFFFFFFFFFFFFFFFFFFFFFFFFFFFFFFFFFFFFFFFFFFFFFFFFFFFFFFFFFFFFF  
@A00155:342:HHGFNDSXY:1:2672:8079:33520 2:N:0:GAACCTAG+TCCGCATA  
GGACTCGTCAGGTAGCCTACTAGACTACGACTTACACGGTAGGTCTGTGAACAAGCCCGGAGTACATCT



CCTTTGGAACCAGGAGACCCCTCCGGTCTTGTC AACCTCTGTTTCGGCAGAGGATACCGTGCTCCAC  
+  
FFFFFFFFFFFFFFF,FFFFFFFFFFFFFFFFFFFFFFFFFFFFFFFFFFFFF:FFFFFFFFFFFFFFFFFFFFFFFFF  
FFFFFFFFFFFFFFFFFFFFFFFFFFFFFFFFFFFFFFFFF:FFF::FFFFFFFFFFFFFFFFFFFFFFFFF  
@A00155:342:HHGFNDSXY:1:2672:27787:35336 2:N:0:GAACCTAG+TCCGCATA  
GGACTCGTCAGGTAGCCTACTAGACTACGACTTACACGGTAGGTCGTGAACAAGCCCGGAGTACATCT  
CCTTTGGA ACTAGGAGACCCCTCCGGTCTTGTC AACCTCTGTTTCGGCAGAGGATACCGTGCTCCAC  
+  
FFFFFFFFFFFFFFFFFFFFFFFFFFFFFFFFFFFFF:FFFFFFFFFFFFFFFFFFFFFFFFFFFFF:F:FFFFFFF,FFFF  
FFFFFFFFFFFFFFFFFFFFF:FFFFFFFFFFFFFFFFFFFFFFFFFFFFFFFFFFFFFFFFFFFFFFFFFFFFFFFFF  
@A00155:342:HHGFNDSXY:1:2673:32642:14058 2:N:0:GAACCTAG+TCCGCATA  
CTACTAGACTACGACTTACACGGTAGGTCGTGAACAAGCCCGGAGTACATCTCCTTTGGA ACTAGGAG  
ACCCCTCCGGTCTTGTC AACCTCTGTTTCGGCAGAGGATACCGTGCTCCACAGCTGTAAGGCTGTGG  
+  
FFFFFFFFFFFFFFFFFFFFFFFFFFFFFFFFFFFFF:FFFFFFFFFFFFFFFFFFFFFFFFFFFFF:F:FFFFFFF,FFFF  
FFFFFFFFFFFFFFFFFFFFF:FFFFFFFFFFFFFFFFFFFFFFFFFFFFFFFFFFFFFFFFFFFFFFFFFFFFFFFFF  
@A00155:342:HHGFNDSXY:1:2673:16685:14512 2:N:0:GAACCTAG+TCCGCATA  
TAGGTCGTGAACAAGCCCGGAGTACATCTCCTTTGGA ACTAGGAGACCCCTCCGGTCTTGTC AACCT  
CTGTTTCGGCAGAGGATACCGTGCTCCACAGCTGTAAGGCTGTGGGCCCGAGAGAAGTCGCTCTCTCT  
+  
FFFFFFFFFFFFFFFFFFFFFFFFFFFFFFFFFFFFF,FFFFF::FFFFFFFFFFFFFFFFFFFFFFFFF:F:FFFFFFF  
FFFFFFF:FFFFFFF:FFFFFFFFFFFFFFFFFFFFF:F:FFFFFFFFFFFFFFFFFFFFFFFFFFFFFFFFFFFFF  
@A00155:342:HHGFNDSXY:1:2673:27715:16767 2:N:0:GAACCTAG+TCCGCATA  
GGACTCGTCAGGTAGCCTACTAGACTACGACTTACACGGTAGGTCGTGAACAAGCCCGGAGTACATCT  
CCTTTGGA ACCAGGAGACCCCTCCGGTCTTGTC AACCTCTGTTTCGGCAGAGGATACCGTGCTCCAC  
+  
FFFFFFFFFFFFFFFFFFFFFFFFFFFFFFFFFFFFF:FFFFFFFFFFFFFFFFFFFFFFFFFFFFF:F:FFFFFFF  
FFFFFFF:FFFFFFF:FFFFFFFFFFFFFFFFFFFFF:F:FFFFFFFFFFFFFFFFFFFFFFFFFFFFFFFFFFFFF  
@A00155:342:HHGFNDSXY:1:2673:28754:31782 2:N:0:GAACCTAG+TCCGCATA  
ACGGTAGGTCGTGAACAAGCCCGGAGTACATCTCCTTTGGA ACTAGGAGACCCCTCCGGTCTTGTC AAC  
ACCTCTGTTTCGGCAGAGGATACCGTGCTCCACAGCTGTAAGGCTGTGGGCCCGAGAGAAGTCGCTCT  
+  
FFFFFFFFFFFFFFFFFFFFFFFFFFFFFFFFFFFFF:FFFFFFFFFFFFFFFFFFFFFFFFFFFFF:F:FFFFFFF  
FFFFFFFFFFFFFFFFFFFFF:FFFFFFFFFFFFFFFFFFFFFFFFFFFFFFFFFFFFFFFFFFFFFFFFFFFFFFFFF  
@A00155:342:HHGFNDSXY:1:2674:5032:1595 2:N:0:GAACCTAG+TCCGCATA  
GTTGTGTAAGTTTCGTCTAAAAGGACTCGTCAGGTAGCCTACTAGACTACGACTTACACGGTAGGT  
CGTGAACAAGCCCGGAGTACATCTCCTTTGGA ACTAGGAGACCCCTCCGGTCTTGTC AACCTCTGTT  
+  
::FFFFFFFFFFFFFFFFFFFFF:FFFFFFFFFFFFFFFFFFFFFFFFFFFFF:FFF:FFFF,FFFFFFFFF:FFFF,:F  
FFFFFFFFF:FFFF,,FFFFFFFFF,FFF::FFFFFFFFF:FFFFFFFFF:FF:FFFF,FFFFFFFFFFFFFFFFF  
@A00155:342:HHGFNDSXY:1:2674:12409:2628 2:N:0:GAACCTAG+TCCGCATA  
CCTACTAGACTACGACTTACACGGTAAGTCGTGAACAAGCCCGGAGTACATCTCCTTTGGA ACTAGGA  
GACCCCTCCGGTCTTGTC AACCTCTGTTTCGGCAGAGGATACCGTGCTCCACAGCTGTAAGGCTGTG  
+  
FFFF:FF:FFFFFFF,FFFF:FF,FFFFFFFFFFFFF,FF,F:FFFFFFFFFFFFF:FFFFFFF:FFF:F  
FFFFFFF:FFFFFFFFFFFFFFFFF:FFFF,FFFFFFFFF,FFFFFFF:FFFFFFFFFFFFFFFFFFFFFFFFF  
@A00155:342:HHGFNDSXY:1:2674:18466:8359 2:N:0:GAACCTAG+TCCGCATA  
GGAACGGACTCATCAGGGAGCCTACTAGACTCCGACCGTCATGGGGGTTCAAACCCATGCCCAACAC  
ACCGCCTTAGATCAGCTGTGTCCA CTTAAGGACTCACCTCTGGCCTATGGTCATCTCAATGCCGAGAG  
+  
FFFFFFFFFFFFFFFFFFFFFFFFFFFFFFFFFFFFF:FFFFFFFFFFFFFFFFFFFFFFFFFFFFF:F:FFFFFFF  
FFFFFFFFFFFFFFFFFFFFF:FFFFFFFFFFFFFFFFFFFFFFFFFFFFFFFFFFFFFFFFFFFFFFFFFFFFFFFFF  
@A00155:342:HHGFNDSXY:1:2674:22173:18161 2:N:0:GAACCTAG+TCCGCATA  
AGGACGAACTTACACA AACTCGAAGAGTAACGACGGTTTCGTCCTTGGAACGGACTCATCAGGGAGCC

TACTAGACTCCGACCGTCATGGGGGTTCAAACCCATGCCCCGCCACACCGCCTTAGATCAGCTGTGTC  
 +  
 FFFFFFFF:FFFFFFFFFFFFFFFFFFFFFFFFFFFFFFFFFFFFFFFFFFFFFFFFFFFFFFFFFFFFFFFF,FFFFFFFFFFFFFFFFFFFFFFFF  
 FFFFFFFFFFFFFFFFFFFFFFFFFFFFFFFFFFFFFFFFFFFFFFFFFFFFFFFFFFFFFFFFFFFFFFFFFFFFFFFFFFFFFFFFFFFFFFFFFFFFFF  
 @A00155:342:HHGFNDSXY:1:2674:16288:19085 2:N:0:GAACCTAG+TCCGCATA  
 ACTTACACGGTAGGTCGTGAACAAGCCCGAGTACATCTCCTTTGGAACCAGGAGACCCCTCCGGTCT  
 TGTCCAACCTCTGTTTCGGCAGAGGATACCGTGCTCCACAGCTGTAAGGCTGTGGGCCCGAGAGAAGT  
 +  
 FFFFFFFFFFFFFFFFFFFFFFFFFFFFFFFFFFFFFFFFFFFFFFFFFFFFFFFFFFFFFFFFFFFFFFFFFFFFFFFFFFFFFFFFFFFFFFFFFFFFFF  
 FF:FFFFFFFFFFFFFFFFFFFFFFFFFFFFFFFFFFFFFFFFFFFFFFFFFFFFFFFFFFFFFFFFFFFFFFFFFFFFFFFFFFFFFFFFFFFFFFFFFFFF  
 @A00155:342:HHGFNDSXY:1:2674:15519:22232 2:N:0:GAACCTAG+TCCGCATA  
 TTTAGGACGAACTTACACAACCTCGAAGAGTAACGACGGTTTCGTCTTGAACGGACTCATCAGGGA  
 GCCTACTAGACTCCGACCGTCATGGGGGTTCAAACCCATGCCCCGCCACACCGCCTTAG  
 +  
 FFFFFF:FFFFFFFFFFFFFFFFFFFFFFFFFFFFFFFFFFFFFFFFFFFFFFFFFFFFFFFFFFFFFFFFFFFFFFFFFFFFFFFFFFFFFFFFFFFFFFFFFFFF  
 FFFFFFFFFFFFFFFFFFFFFFFFFFFFFFFFFFFFFFFFFFFFFFFFFFFFFFFFFFFFFFFFFFFFFFFFFFFFFFFFFFFFFFFFFFFFFFFFFFFFFF  
 @A00155:342:HHGFNDSXY:1:2674:11207:27853 2:N:0:GAACCTAG+TCCGCATA  
 AGCCCGGAGTACATCTCCTTTGGAAGTACGAGACCCCTCCGGTCTTGTCCAACCTCTGTTTCGGCAGAG  
 GATACCGTGCTCCACAGCTGTAAGGCTGTGGGCCCGAGAGAAGTCGCTCTCTCTCGCCCTCCACATC  
 +  
 FFFFFFFFFF:FFFFFFFFFFFFFFFFFFFFFFFFFFFFFFFFFFFFFFFFFFFFFFFFFFFFFFFFFFFFFFFFFFFFFFFFFFFFFFFFFFFFFFFFFFFFFFFFFFFF  
 FFFFFFFFFFFFFFFFFFFFFFFFFFFFFFFFFFFFFFFFFFFFFFFFFFFFFFFFFFFFFFFFFFFFFFFFFFFFFFFFFFFFFFFFFFFFFFFFFFFFFF  
 @A00155:342:HHGFNDSXY:1:2674:11207:27853 2:N:0:GAACCTAG+TCCGCATA  
 AGCCCGGAGTACATCTCCTTTGGAAGTACGAGACCCCTCCGGTCTTGTCCAACCTCTGTTTCGGCAGAG  
 GATACCGTGCTCCACAGCTGTAAGGCTGTGGGCCCGAGAGAAGTCGCTCTCTCTCGCCCTCCACATC  
 +  
 FFFFFFFFFF:FFFFFFFFFFFFFFFFFFFFFFFFFFFFFFFFFFFFFFFFFFFFFFFFFFFFFFFFFFFFFFFFFFFFFFFFFFFFFFFFFFFFFFFFFFFFFFFFFFFF  
 FFFFFFFFFFFFFFFFFFFFFFFFFFFFFFFFFFFFFFFFFFFFFFFFFFFFFFFFFFFFFFFFFFFFFFFFFFFFFFFFFFFFFFFFFFFFFFFFFFFFFF  
 @A00155:342:HHGFNDSXY:1:2675:29197:2613 2:N:0:GAACCTAG+TCCGCATA  
 AAAAGGACTCGTCAGGTAGCCTACTAGACTACGACTTACACGGTAGGTCGTGAACAAGCCCGGAGTAC  
 ATCTCCTTTGGAACCAGGAGACCCCTCCGGTCTTGTCCAACCTCTGTTTCGGCAGAGGATACCGTGCT  
 +  
 FF:FFFFFFFFFFFFFFFFFFFFFFFFFFFFFFFFFFFFFFFFFFFFFFFFFFFFFFFFFFFFFFFFFFFFFFFFFFFFFFFFFFFFFFFFFFFFFFFFFFFF  
 FFFFFFFFFFFFFFFFFFFFFFFFFFFFFFFFFFFFFFFFFFFFFFFFFFFFFFFFFFFFFFFFFFFFFFFFFFFFFFFFFFFFFFFFFFFFFFFFFFFFFF  
 @A00155:342:HHGFNDSXY:1:2675:5249:10019 2:N:0:GAACCTAG+TCCGCATA  
 GAGACCCCTCCGGTCTTGTCCAACCTCTGTTTCGGCAGAGGATACCGTGCTCCACAGCTGTAAGGCTG  
 TGGGCCCGAGAGAAGTCGCTCTCTCTCGCCCTCCACATCCCTCTCGGCATTGAGATGACCATAGGCCA  
 +  
 FF:FFFFFFFFFFFFFFFFFFFFFFFFFFFFFFFFFFFFFFFFFFFFFFFFFFFFFFFFFFFFFFFFFFFFFFFFFFFFFFFFFFFFFFFFFFFFFFFFFFFF  
 FFFFFFFFFFFFFFFFFFFFFFFFFFFFFFFFFFFFFFFFFFFFFFFFFFFFFFFFFFFFFFFFFFFFFFFFFFFFFFFFFFFFFFFFFFFFFFFFFFFFFF  
 @A00155:342:HHGFNDSXY:1:2675:12346:14888 2:N:0:GAACCTAG+TCCGCATA  
 CCTACTAGACTACGACTTACACGGTAGGTCGTGAACAAGCCCGGAGTACATCTCCTTTGGAAGTACGAG  
 GACCCCTCCGGTCTTGTCCAACCTCTGTTTCGGCAGAGGATACCGTGCTCCACAGCTGTAAGGCTGTG  
 +  
 FFFFFFFFFF:FFFFFFFFFFFFFFFFFFFFFFFFFFFFFFFFFFFFFFFFFFFFFFFFFFFFFFFFFFFFFFFFFFFFFFFFFFFFFFFFFFFFFFFFFFFFFFFFFFFF  
 FFFFFFFFFFFFFFFFFFFFFFFFFFFFFFFFFFFFFFFFFFFFFFFFFFFFFFFFFFFFFFFFFFFFFFFFFFFFFFFFFFFFFFFFFFFFFFFFFFFFFF  
 @A00155:342:HHGFNDSXY:1:2675:28067:24799 2:N:0:GAACCTAG+TCCGCATA  
 ACCGCCTTAGATCAGCTGTGTCCACTTAAGGACTCACCTCTGGCCTATGGTCATCTCAATGCCGAGAG  
 GGATGTAGAGGGCGAGAGAGAGCGACTTCTCTCGGGCCACAGCCTTACAGCTGTGGAGCACGGTATC  
 +  
 FFFFFFFFFFFFFFFFFFFFFFFFFFFFFFFFFFFFFFFFFFFFFFFFFFFFFFFFFFFFFFFFFFFFFFFFFFFFFFFFFFFFFFFFFFFFFFFFFFFFFF  
 FFF,FFFFFFFFFFFFFFFFFFFFFFFFFFFFFFFFFFFFFFFFFFFFFFFFFFFFFFFFFFFFFFFFFFFFFFFFFFFFFFFFFFFFFFFFFFFFFFFFFFFF  
 @A00155:342:HHGFNDSXY:1:2676:32841:5196 2:N:0:GAACCTAG+TCCGCATA  
 CTTGTCCAACCTCTGTTTCGGCAGAGGATACCGTGCTCCACAGCTGTAAGGCTGTGGGCCCGAGAGAA  
 GTCGCTCTCTCTCGCCCTCCACATCCCTCTCGGCATTGAGATGACCATAGGCCAGAGGAGAGTCCTTA  
 +  
 FFFFFFFFFFFFFFFFFFFFFFFFFFFFFFFFFFFFFFFFFFFFFFFFFFFFFFFFFFFFFFFFFFFFFFFFFFFFFFFFFFFFFFFFFFFFFFFFFFFFFF  
 FFFFFFFFFFFFFFFFFFFFFFFFFFFFFFFFFFFFFFFFFFFFFFFFFFFFFFFFFFFFFFFFFFFFFFFFFFFFFFFFFFFFFFFFFFFFFFFFFFFFFF  
 @A00155:342:HHGFNDSXY:1:2676:32199:21840 2:N:0:GAACCTAG+TCCGCATA  
 GGACTCACCTCTGGCCTATGGTCATCTCAATGCCGAGAGGGATGTGGAGGGCGAGAGAGAGCGACTTC

TCTCGGGCCACAGCCTTACAGCTGTGGAGACGGTATCCTCTGCCGAAACAGAGGTTGGACAAGACC  
 +  
 FFFFFFFFFFFFFFFFFFFFFFFFFFFFFFFFFFFFFFFFFFFFFFFFFFFFFFFFFFFFFFFFFFFFFFFFFF, FFFFFFFFFFFFFFFFFFFFFFFFFFFFFFFFFF  
 FFFFFFFFFFFFFFFFFFFFFFFFFFFFFFFFFFFFFFFFFFFFFFFFFFFFFFFFFFFFFFFFFFFFFFFFFF: FFFFFFFFFFFFFFFFFFFFFFFFFF: FFFFFFFFFFFFFFFFFF: FFFFFFFFFF  
 @A00155:342:HHGFNDSXY:1:2676:10963:27555 2:N:0:GAACCTAG+TCCGCATA  
 GGACTCGTCAGGTAGCCTACTAGACTACGACTTACACGGTAGGTCGTGAACAAGCCCGGAGTACATCT  
 CCTTTGGAAGTAGGAGACCCATCCGGTCTTGTCCAACCTCTGTTTCGGCAGAGGATACCGTGCTCCAC  
 +  
 FFFFFFFFFFFFFFFFFFFFFFFFFFFFFFFFFFFFFFFFFFFFFFFFFFFFFFFFFFFFFFFFFFFFFFFFFF  
 FFFFFFFFFFFFFFFFFFFFFFFFFFFFFFFFFFFFFFFFFFFFFFFFFFFFFFFFFFFFFFFFFFFFFFFFFF: FFFFFFFFFF, FFFFFFFF: FFFFFFFFFFFFFFFFFFFFFFFFFFFFFFFFFF  
 @A00155:342:HHGFNDSXY:1:2677:4779:5854 2:N:0:GAACCTAG+TCCGCATA  
 GGTCTTGTCCAACCTCTGTTTCGGCAGAGGATACCGTGCTCCACAGCTGTAAGGCTGTGGGCCCGAGA  
 GAAGTCGCTCTCTCTCGCCCTCCACATCCCTCTCGGCATTGAGATGACCATAGGCCAGAGGTGAGTCC  
 +  
 FFFFF: FFFFFFFFFF: FFFFFFFFFFFFFFFFFFFFFFFFFFFFFFFFFF: FF: FFFFFFFFFFFFFFFFFF, FF  
 F: FFFFFFFFFFFFFFFFFFFFFFFFFFFFFFFFFF: FF: FFFFFFFFFFFFFFFFFF: FFFFFFFFFF  
 @A00155:342:HHGFNDSXY:1:2677:5810:7733 2:N:0:GAACCTAG+TCCGCATA  
 GGTCTTGTCCAACCTCTGTTTCGGCAGAGGATACCGTGCTCCACAGCTGTAAGGCTGTGGGCCCGAGA  
 GAAGTCGCTCTCTCTCGCCCTCCACATCCCTCTCGGCATTGAGATGACCATAGGCCAGAGGTGAGTCC  
 +  
 FFFFFFFFFFFFFFFFFFFFFFFFFFFFFFFFFFFFFFFFFFFFFFFFFFFFFFFFFFFFFFFFFFFFFFFFFF  
 FFFFFFFFFFFFFFFFFFFFFFFFFFFFFFFFFFFFFFFFFFFFFFFFFFFFFFFFFFFFFFFFFFFFFFFFFF: FFFFFFFFFF  
 @A00155:342:HHGFNDSXY:1:2677:23827:17143 2:N:0:GAACCTAG+TCCGCATA  
 ACTACGACTTACACGGTAGGTCGTGAACAAGCCCGGAGTACATCTCCTTTGGAAGTAGGAGACCCCTC  
 CGGTCTTGTCCAACCTCTGTTTCGGCAGAGGATACCGTGCTCCACAGCTGTAAGGCTGTGGGCCCGAG  
 +  
 FFFFFFFFFFFFFFFFFFFFFFFFFFFFFFFFFFFFFFFFFFFFFFFFFFFFFFFFFFFFFFFFFFFFFFFFFF  
 FFFFFFFFFFFFFFFFFFFFFFFFFFFFFFFFFFFFFFFFFFFFFFFFFFFFFFFFFFFFFFFFFFFFFFFFFF: FFFFFFFFFF  
 @A00155:342:HHGFNDSXY:1:2677:25988:18724 2:N:0:GAACCTAG+TCCGCATA  
 ACTACGACTTACACGGTAGGTCGTGAACAAGCCCGGAGTACATCTCCTTTGGAAGTAGGAGACCCCTC  
 CGGTCTTGTCCAACCTCTGTTTCGGCAGAGGATACCGTGCTCCACAGCTGTAAGGCTGTGGGCCCGAG  
 +  
 FFFFFFFFFFFFFFFFFFFFFFFFFFFFFFFFFFFFFFFFFFFFFFFFFFFFFFFFFFFFFFFFFFFFFFFFFF  
 FFFFFFFFFFFFFFFFFFFFFFFFFFFFFFFFFFFFFFFFFFFFFFFFFFFFFFFFFFFFFFFFFFFFFFFFFF: FFFFFFFFFF  
 @A00155:342:HHGFNDSXY:1:2677:3848:31641 2:N:0:GAACCTAG+TCCGCATA  
 GAGACCCCTCCGGTCTTGTCCAACCTCTGTTTCGGCAGAGGATACCGTGCTCCACAGCTGTAAGGCTG  
 TGGGCCCGAGAGAAGTCTCTCTCTCTCGCCCTCCACATCCCTCTCGGCATTGAGATGACCATAGGCCA  
 +  
 FFFFFFFFFFFFFFFFFFFFFFFFFFFFFFFFFFFFFFFFFFFFFFFFFFFFFFFFFFFFFFFFFFFFFFFFFF: FFFFFFFF  
 FFFFFFFFFFFFFFFFFFFFFFFFFFFFFFFFFFFFFFFFFFFFFFFFFFFFFFFFFFFFFFFFFFFFFFFFFF: FFFFFFFF  
 @A00155:342:HHGFNDSXY:1:1105:30933:8030 1:N:0:GAACCTAG+TCCGCATA  
 GTCATCTCAATGCCGAGAGGGATGTGGAGGGCGAGAGAGAGCGACTTCTCTCGGGCCACAGCCTTAC  
 AGCTGTGGAGCACGGTATCCTCTGCCGAAACAGAGGTTGACAAGACCGGAGGGGTCTCTAGTACCA  
 +  
 FFFFFFFFFFFFFFFFFF: FFFFF: FFFFFFFFFFFFFFFFFFFFFFFFFFFFFFFFFF: FF  
 FFFFFFFFFFFFFFFFFFFFFFFFFFFFFFFFFFFFFFFFFFFFFFFFFFFFFFFFFFFFFFFFFFFFFFFFFF: FFFFFF  
 @A00155:342:HHGFNDSXY:1:1118:31033:19977 1:N:0:GAACCTAG+TCCGCATA  
 GAGCGACTTCTCTCGGGCCACAGCCTTACAGCTGTGGAGCACGGTATCCTCTGCCGAAACAGAGGTT  
 GGACAAGACCGGAGGGGTCTCCTGGTTCAAAGGAGATGTACTCCGGGCTTGTTACGACCTACCGTG  
 +  
 FFFFFFFFFFFFFFFFFFFFFFFFFFFFFFFFFFFFFFFFFF, FFFFFFFFFFFFFFFFFF: FFFFFFFFFFFFFFFFFF  
 FFFFFFFFFFFFFFFFFF: FFFFFFFFFFFFFFFFFFFFFFFFFFFFFFFFFF: FFFFFFFFFF  
 @A00155:342:HHGFNDSXY:1:1128:12491:8813 2:N:0:GAACCTAG+TCCGCATA  
 TCGTGAACAAGCCCGGAGTACATCTCCTTTGGAACCAGGAGACCCCTCCGGTCTTGTCCAACCTCTGT

TTCGGCAGAGGATACCGTGCTCCACAGCTGTAAGGCTGTGGGCCCCGAGAGAAGTCGCTCTCTCTCGCC  
+  
FFFFFFFFFFFFFFFFFFFFFFFFFFFFFFFFFFFFFFFFFFFFFFFFFFFFFFFFFFFFFFFFFFFFFFFF  
FFFFFFFFFFFFFFFFFFFFFFFFFFFFFFFFFFFFFFFFFFFFFFFFFFFFFFFFFFFFFFFFFFFFFFFF  
@A00155:342:HHGFNDSXY:1:1156:20591:25942 1:N:0:GAACCTAG+TCCGCATA  
AGCGACTTCTCTCGGGCCCACAGCCTTACAGCTGTGGAGCACGGTATCCTCTGCCGAAACAGAGGTTG  
GACAAGACCGGAGGGGTCTCCTGGTTCCAAAGGAGATGTACTCCGGGCTTGTTACGACCTACCGTGT  
+  
FFFFFFFFFFFFFFFFFFFFFFFFFFFFFFFFFFFFFFFFFFFFFFFFFFFFFFFFFFFFFFFFFFFFFFFF  
FFFFFFFFFFFFFFFFFFFFFFFFFFFFFFFFFFFFFFFFFFFFFFFFFFFFFFFFFFFFFFFFFFFFFFFF  
@A00155:342:HHGFNDSXY:1:1161:31006:30013 1:N:0:GAACCTAG+TCCGCATA  
GGCCTATGGTCATCTCAATGCCGAGAGGGATGTGGAGGGCGAGAGAGAGCG  
+  
FFFFFFFFFFFFFFFFFFFFFFFFFFFFFFFFFFFFFFFFFFFFFFFFFFFFFFFFFFFFFFFFFFFFFFFF  
@A00155:342:HHGFNDSXY:1:1214:30038:5165 2:N:0:GAACCTAG+TCCGCATA  
GGACTCGTCAGGTAGCCTACTAGACTACGACTTACACGGTAGGTCGTGAACAAGCCCGGAGTACATCT  
CCTTTGGAACCAGGAGACCCCTCCGGTCTTGTCCAACCTCTGTTTCGGCAGAGGATACCGTGCTCCAC  
+  
FFFFFFFFFFFFFFFFFFFFFFFFFFFFFFFFFFFFFFFFFFFFFFFFFFFFFFFFFFFFFFFFFFFFFFFF  
FFFFFFFFFFFFFFFFFFFFFFFFFFFFFFFFFFFFFFFFFFFFFFFFFFFFFFFFFFFFFFFFFFFFFFFF  
@A00155:342:HHGFNDSXY:1:1224:32841:15718 1:N:0:GAACCTAG+TCCGCATA  
GGTAGGTCGTGAACAAGCCCGGAGTACATCTCCTTTGGAAGTAGGAGA  
+  
FFFFFFFFFFFFFFFFFFFFFFFFFFFFFFFFFFFFFFFFFFFFFFFFFFFFFFFFFFFFFFFFFFFFFFFF  
@A00155:342:HHGFNDSXY:1:1234:7717:10066 1:N:0:GAACCTAG+TCCGCATA  
GAGCGACTTCTCTCGGGCCCACAGCCTTACAGCTGTGGAGCACGGTATCCTCTGCCGAAACAGAGGTT  
GGACAAGACCGGAGGGGTCTCCTAGTTCCAAAGGAGATGTACTCCGGGCTTGTTACGACCTACCGTG  
+  
FFFFFFFFFFFFFFFFFFFFFFFFFFFFFFFFFFFFFFFFFFFFFFFFFFFFFFFFFFFFFFFFFFFFFFFF  
FFFFFFFFFFFFFFFFFFFFFFFFFFFFFFFFFFFFFFFFFFFFFFFFFFFFFFFFFFFFFFFFFFFFFFFF  
@A00155:342:HHGFNDSXY:1:1239:3278:15280 1:N:0:GAACCTAG+TCCGCATA  
CTCAATGCCGAGAGGGATGTGGAGGGCGAGAGAGAGCGACTTCTCTCGGGCCCACAGCCTTACAGCTG  
TGGAGCACGGTATCCTCTGCCGAAACAGAGGTTGGACAAGACCGGAGGGGTCTCCTGGTTCCAAAGGA  
+  
FFFFFFFFFFFFFFFFFFFFFFFFFFFFFFFFFFFFFFFFFFFFFFFFFFFFFFFFFFFFFFFFFFFFFFFF  
FFFFFFFFFFFFFFFFFFFFFFFFFFFFFFFFFFFFFFFFFFFFFFFFFFFFFFFFFFFFFFFFFFFFFFFF  
@A00155:342:HHGFNDSXY:1:1241:19235:1548 1:N:0:GAACCTAG+TCCGCATA  
TATCCTCTGCCGAAACAGAGGTTGGACAAGACCGGAGGGGTCTCCTGGTTCCAAAGGAGATGTACTCC  
GGGCTTGTTACGACCTACCGTGTAAGTCGTAGTCTAGTAGGCTACCTGACGAGTCCTTTTAGGACG  
+  
FF:FFFFFFFFFFFFFFFFFFFFFFFFFFFFFFFFFFFFFFFFFFFFFFFFFFFFFFFFFFFFFFFFFFFF  
FFFFFFFFFFFFFFFFFFFFFFFFFFFFFFFFFFFFFFFFFFFFFFFFFFFFFFFFFFFFFFFFFFFFFFFF  
@A00155:342:HHGFNDSXY:1:1268:1452:3255 1:N:0:GAACCTAG+TCCGCATA  
GCTCCACAGCTGTAAGGCTGTGGGCCCCGAGAGAAGTCGCTCTCTCTCGCCC  
+  
FFFFFFFFFFFFFFFFFFFFFFFFFFFFFFFFFFFFFFFFFFFFFFFFFFFFFFFFFFFFFFFFFFFFFFFF  
@A00155:342:HHGFNDSXY:1:1277:9064:13683 2:N:0:GAACCTAG+TCCGCATA  
CGACTTCTCTCGGGCCCACAGCCTTACAGCTGTGGAGCACGGTATCCTCTGCCGAAACAGAGGTTGGA  
CAAGACCGGAGGGGTCTCCTAGTTCCAAAGGAGATGTACTCCGGGCTTGTTACGACCTACCGTGTA  
+  
FFFFFFFFFFFFFFFFFFFFFFFFFFFFFFFFFFFFFFFFFFFFFFFFFFFFFFFFFFFFFFFFFFFFFFFF  
FFFFFFFFFFFFFFFFFFFFFFFFFFFFFFFFFFFFFFFFFFFFFFFFFFFFFFFFFFFFFFFFFFFFFFFF  
@A00155:342:HHGFNDSXY:1:1303:27353:35994 2:N:0:GAACCTAG+TCCGCATA  
GAGACCCCTCCGGTCTTGTCCAACCTCTGTTTCGGCAGAGGATACCGTGCTCCACAGCTGTAAGGCTG

```
TGGGCCCCGAGAGAAGTCGCTCTCTCTCGCCCTCCACATCCCTCTCGGCATTGAGATGACCATAGGCCA
+
FFFFFFFFFFFFFFFFFFFFFFFFFFFFFFFFFFFFFFFFFFFFFFFFFFFFFFFFFFFFFFFFFFFFFFFFFFFF
FFFFFFFFFFFFFFFFFFFFFFFFFFFFFFFFFFFFFFFFFFFFFFFFFFFFFFFFFFFFFFFFFFFFFFFFFFFF
@A00155:342:HHGFNDSXY:1:1336:28339:26804 1:N:0:GAACCTAG+TCCGCATA
TAAGTTTCGTCCTAAAAAGGACTCGTCAGGTAGCCTACTAGACTACGACTT
+
FFF:FFFFFFFFFFFFFFFFFFFFFFFFFFFFFFFFFFFFFFFFFFFFFFFFFFFFFFFFFFFFFFFFFFFF
@A00155:342:HHGFNDSXY:1:1346:18005:4210 1:N:0:GAACCTAG+TCCGCATA
CTCAATGCCGAGAGGGATGTGGAGGGCGAGAGAGAGCGACTTCTCTCGGGCCCCACAGCCTTACAGCTG
TGGAGCACGGTATCCTCTGCCGAAACAGAGGTTGGACAAGACCGGAGGGGTCTCTGGTTCCAAAGGA
+
FFFFFFFFFFFFFFFFFFFFFFFFFFFFFFFFFFFFFFFFFFFFFFFFFFFFFFFFFFFFFFFFFFFFFFFFFFFF
FFFFFFFF:FFFFFFFF:FFFFFFFFFFFFFFFFFFFFFFFFFFFFFFFFFFFFFFFFFFFFFFFFFFFFFFFF
@A00155:342:HHGFNDSXY:1:1347:21414:33630 2:N:0:GAACCTAG+TCCGCATA
ACTTACACGGTAGGTCTGTGAACAAGCCCGGAGTACATCTCCTTTGGAAGTACTAGGAGACCCCTCCGGTCT
TGTCCAACCTCTGTTTCGGCAGAGGATACCGTGCTCCACAGCTGTAAGGCTGTGGGCCCGAGAGAAGT
+
FFFFFFFFFFFFFFFFFFFFFFFFFFFFFFFFFFFFFFFFFFFFFFFFFFFFFFFFFFFFFFFFFFFFFFFFFFFF
FFFFFFFFFFFFFFFFFFFFFFFFFFFFFFFF:FFFFFFFFFFFFFFFFFFFFFFFFFFFFFFFFFFFFFFFFFFFF
@A00155:342:HHGFNDSXY:1:1369:6596:17989 2:N:0:GAACCTAG+TCCGCATA
ACCGTGCTCCACAGCTGTAAGGCTGTGGGCCCGAGAGAAGTCGCTCTCTCTCGCCCTCCACATCCCTC
TCGGCATTGAGATGACCATAGGCCAGAGGTGAGTCCTTAAGTGGACACAGCTGATCTAAGGCGGTCT
+
FFFFFFFFFFFFFFFFFFFFFFFFFFFFFFFFFFFFFFFFFFFFFFFFFFFFFFFFFFFFFFFFFFFFFFFFFFFF
FFFFFFFFFFFFFFFFFFFFFFFFFFFFFFFF:FFFFFFFFFFFFFFFFFFFFFFFFFFFFFFFFFFFFFFFFFFFF
@A00155:342:HHGFNDSXY:1:1428:14262:8719 2:N:0:GAACCTAG+TCCGCATA
GAAACCGTCGTTACTCTTCGAGTTGTGTAAGTTTCGTCCTAAAAAGGACTCGTCAGGTAGCCTACTAG
ACTACGACTTACACGGTAGGTCTGTGAACAAGCCCGGAGTACATCTCCTTTGGAAGTACTAGGAGACCCCTC
+
FFFFFFFFFFFFFFFFFFFFFFFFFFFFFFFFFFFFFFFFFFFFFFFFFFFFFFFFFFFFFFFFFFFFFFFFFFFF
FFFFFFFFFFFFFFFFFFFFFFFFFFFFFFFF:FFFFFFFFFFFFFFFFFFFFFFFFFFFFFFFFFFFFFFFFFFFF
@A00155:342:HHGFNDSXY:1:1433:29152:33818 1:N:0:GAACCTAG+TCCGCATA
CTCATCAGGGAGCCTACTAGACTCCGACCGTCATGGGGGTTCAAACCCATG
+
FFFFFFFFFFFFFFFFFFFFFFFFFFFFFFFFFFFFFFFFFFFFFFFFFFFFFFFFFFFFFFFFFFFFFFFFFFFF
@A00155:342:HHGFNDSXY:1:1435:5746:11068 1:N:0:GAACCTAG+TCCGCATA
GAGGGCGAGAGAGAGCGACTTCTCTCGGGCCCCACAGCCTTACAGCTGTGGAGCACGGTATCCTCTGCC
GAAACAGAGGTTGGACAAGACCGGAGGGGTCTCCTAGTTCCAAAGGAGATGTAAGTCCGGGCTTGTTCA
+
FFFFFFFFFFFFFFFFFFFFFFFFFFFFFFFFFFFFFFFFFFFFFFFFFFFFFFFFFFFFFFFFFFFFFFFFFFFF
FFFF,FFFFFFFFFFFFFFFFFFFFFFFFFFFFFFFFFFFFFFFFFFFFFFFFFFFFFFFFFFFFFFFFFFFF
@A00155:342:HHGFNDSXY:1:1445:18114:26882 1:N:0:GAACCTAG+TCCGCATA
TGTTTCGGCAGAGGATACCGTGCTCCACAGCTGTAAGGCTGTGGGCCCGAGAGAAGTCGCTCTCTCTC
GCCCTTACATCCCTCTCGGCATTGAGATGACCATAGGCCAGAGGTGAGTCCTTAAGTGGACACAGCT
+
FFFFFFFFFFFFFFFFFFFFFFFFFFFFFFFFFFFFFFFFFFFFFFFFFFFFFFFFFFFFFFFFFFFFFFFFFFFF
FFFFFFFFFFFFFFFFFFFFFFFFFFFFFFFF:FFFFFFFFFFFFFFFFFFFFFFFFFFFFFFFFFFFFFFFFFFFF
@A00155:342:HHGFNDSXY:1:1454:17047:21809 1:N:0:GAACCTAG+TCCGCATA
GAGGGCGAGAGAGAGCGACTTCTCTCGGGCCCCACAGCCTTACAGCTGTGGAGCACGGTATCCTCTGCC
GAAACAGAGGTTGGACAAGACCGGAGGGGTCTCCTAGTTCCAAAGGAGATGTAAGTCCGGGCTTGTTCA
+
FFFFFFFFFFFFFFFFFFFFFFFFFFFFFFFFFFFFFFFFFFFFFFFFFFFFFFFFFFFFFFFFFFFFFFFFFFFF
FFFFFFFFFFFFFFFFFFFFFFFFFFFFFFFF:FFFFFFFFFFFFFFFFFFFFFFFFFFFFFFFFFFFFFFFFFFFF
```

+  
FF:FF,FFF,FFFFFFFFFFFFFFFFFFFF,FF,FFFFFFFFFFFFFFFFFFFFFFFFFFFFFFFF:FFF:,FFFFFF  
FFFFFFFF:FFFFFFFFFFFF,,:FFFFFFFF::FF,,FFFFFF:FFFFFFFFFFFFFFFFFFFFFFFFFFFFF  
@A00155:342:HHGFNDSXY:1:1462:26051:32017 1:N:0:GAACCTAG+TCCGCATA  
CTTAGATCAGCTGTGTCCAACCTTAAGGACTCACCTCTGGCCTATGGTCATCTCAATGCCGAGAGGGATG  
TGGAGGGCGAGAGAGAGCGACTTCTCTCGGGCCCACAGCCTTACAGCTGTGGAGCACGGTATCCTCTG  
+  
FFFFFFFFFFFFFFFFFFFFFFFFFFFFFFFFFFFFFFFFFFFFFFFFFFFFFFFFFFFFFFFF:FFFF:F  
FFFFFFFFFFFFFFFFFFFFFFFFFFFFFFFFFFFFFFFFFFFFFFFFFFFFFFFFFFFFFFFFFFFFFFFF  
@A00155:342:HHGFNDSXY:1:1473:32542:23124 2:N:0:GAACCTAG+TCCGCATA  
TCTCCTTTGAACTAGGAGACCCCTCCGGTCTTGTTCCAACCTCTGTTTCGGCAGAGGATACCCTGCTC  
CACAGCTGTAAGGCTGTGGGCCCCGAGAGAAGTCGCTCTCTCTCGCCCTCCACATCCCTCTCGGCATTG  
+  
FFFFFF:FFFF:F:FFFFFFFFFFFFFFFFFFFFFFFFFFFFFFFFFFFFFFFFFFFFFFFFFFFFFFFF  
FFFFFFFFFFFFFFFFFFFFFFFFFFFFFFFFFFFFFFFFFFFFFFFFFFFFFFFFFFFFFFFFFFFFFFFF:  
@A00155:342:HHGFNDSXY:1:1534:12409:8390 1:N:0:GAACCTAG+TCCGCATA  
ACCTCTGTTTCGGCAGAGGATACCCTGCTCCACAGCTGTAAGGCTGTGGGCCCCGAGAGAAGTCGCTCT  
CTCTCGCCCTCCACATCCCTCTCGGCATTGAGATGACCATAGGCCAGAGGAGAGTCCTTAAGTGGACA  
+  
FFFFFFFFFFFFFFFFFFFFFFFFFFFFFFFFFFFFFFFFFFFFFFFFFFFFFFFFFFFFFFFFFFFFFFFF  
FFFFFFFFFFFFFFFFFFFFFFFFFFFFFFFFFFFFFFFFFFFFFFFFFFFFFFFFFFFFFFFFFFFFFFFF:  
@A00155:342:HHGFNDSXY:1:1535:11252:9831 1:N:0:GAACCTAG+TCCGCATA  
GGATGTGGAGGGCGAGAGAGAGCGACTTCTCTCGGGCCCACAGCCTTACAGCTGTGGAGCACGGTATC  
CTCTGCCGAAACAGAGGTTGGACAAGACCGGAGGGGTCTCCTAGTTCAAAGGAGATGTACTCC  
+  
F:FFFFFFFFFFFFFFFFFFFFFFFFFFFFFFFFFFFFFFFFFFFFFFFFFFFFFFFFFFFFFFFFFFFF  
FFFFFFFFFFFFFFFFFFFFFFFFFFFFFFFFFFFFFFFFFFFFFFFFFFFFFFFFFFFFFFFFFFFFFFFF:  
@A00155:342:HHGFNDSXY:1:1538:3631:26600 1:N:0:GAACCTAG+TCCGCATA  
ACTTCTCTCGGGCCCACAGCCTTACAGCTGTGGAGCACGGTATCCTCTGCCGAAACAGAGGTTGGACA  
AGACCGGAGGGGTCTCCTAGTTCAAAGGAGATGTACTCCGGGCTTGTTCACGACCTACCGTGTAAAGT  
+  
FFFFFFFFFFFFFFFFFFFFFFFFFFFFFFFFFFFFFFFFFFFFFFFFFFFFFFFFFFFFFFFFFFFF,FFFFFFF  
FFFFFFFFFFFFFFFFFFFFFFFFFFFFFFFFFFFFFFFFFFFFFFFFFFFFFFFFFFFFFFFFFFFFFFFF:  
@A00155:342:HHGFNDSXY:1:1548:4770:26569 1:N:0:GAACCTAG+TCCGCATA  
ATCTCAATGCCGAGAGGGATGTAGAGGGCGAGAGAGAGCGACTTCTCTCGGGCCCACAGCCTTACAGC  
TGTGGAGCACGGTATCCTCTGCCGAAACAGAGGTTGGACAAGACCGGAGGGGTCTCCTAGTTCAAAG  
+  
FFFFFFFFFFFFFFFFFFFFFFFFFFFFFFFFFFFFFFFFFFFFFFFFFFFFFFFFFFFFFFFFFFFF:FFF  
FFFFFFFFFFFFFFFFFFFFFFFFFFFFFFFFFFFFFFFFFFFFFFFFFFFFFFFFFFFFFFFFFFFFFFFF:  
@A00155:342:HHGFNDSXY:1:1578:24370:32675 1:N:0:GAACCTAG+TCCGCATA  
TCCACTTAAGGACTCACCTCTGGCCTATGGTCATCTCAATGCCGAGAGGGATGTGAAGGGCGAGAGAG  
AGCGACTTCTCTCGGGCCCACAGCCTTACAGCTGTGGAGCACGGTATCCTCTGCCGAAACAGAGGTTG  
+  
FFFFFFFFFFFFFFFFFFFFFFFFFFFFFFFFFFFFFFFFFFFFFFFFFFFFFFFFFFFFFFFFFFFF:FFFF  
FFFFFFFFFFFFFFFFFFFFFFFFFFFFFFFFFFFFFFFFFFFFFFFFFFFFFFFFFFFFFFFFFFFFFFFF:  
@A00155:342:HHGFNDSXY:1:1627:30590:11036 1:N:0:GAACCTAG+TCCGCATA  
GTCATCTCAATGCCGAGAGGGATGTGGAGGGCGAGAGAGAGCGACTTCTCTCGGGCCCACAGCCTTAC  
AGCTGTGGAGCACGGTATCCTCTGCCGAAACAGAGGTTGGACAAGACCGGAGGGGTCTCCTGGTTCCA  
+  
FFFFFFFFFFFFFFFFFFFFFFFFFFFFFFFFFFFFFFFFFFFFFFFFFFFFFFFFFFFFFFFFFFFF:FFFF  
FFFFFFFFFFFFFFFFFFFFFFFFFFFFFFFFFFFFFFFFFFFFFFFFFFFFFFFFFFFFFFFFFFFFFFFF:  
@A00155:342:HHGFNDSXY:1:1627:30590:11036 1:N:0:GAACCTAG+TCCGCATA  
GTCATCTCAATGCCGAGAGGGATGTGGAGGGCGAGAGAGAGCGACTTCTCTCGGGCCCACAGCCTTAC  
AGCTGTGGAGCACGGTATCCTCTGCCGAAACAGAGGTTGGACAAGACCGGAGGGGTCTCCTGGTTCCA

@A00155:342:HHGFNDSXY:1:1636:20763:35509 1:N:0:GAACCTAG+TCCGCATA  
GGATGTGGAGGGCGAGAGAGAGCGACTTCTCTCGGGCCCACAGCCTTACAGCTGTGGAGCACGGTATC  
CTCTGCCGAAACAGAGGTTGGACAAGACCGGAGGGGTCTCCTAGTTCCAAAGGAGATGTACTCC  
+  
FFFFFFFFFFFFFFFFFFFFFFFFFFFFFFFFFFFFFFFFFFFFFFFFFFFFFFFFFFFFFFFFFFFFFFFF  
FFFFFFFFFFFFFFFFFFFFFFFFFFFFFFFFFFFFFFFFFFFFFFFFFFFFFFFFFFFFFFFFFFFFFFFF  
@A00155:342:HHGFNDSXY:1:1636:20880:35681 1:N:0:GAACCTAG+TCCGCATA  
GGATGTGGAGGGCGAGAGAGAGCGACTTCTCTCGGGCCCACAGCCTTACAGCTGTGGAGCACGGTATC  
CTCTGCCGAAACAGAGGTTGGACAAGACCGGAGGGGTCTCCTAGTTCCAAAGGAGATGTACTCC  
+  
FFFFFFFFFFFFFFFFFFFFFFFFFFFFFFFFFFFFFFFFFFFFFFFFFFFFFFFFFFFFFFFFFFFFFFFF  
FFFFFFFFFFFF:FFFFFFFFF:FFFFFFFFFFFFFFFFFFFFFFFFFFFFFFFFFFFFFFFFFFFFFFFF  
@A00155:342:HHGFNDSXY:1:1665:14895:11788 1:N:0:GAACCTAG+TCCGCATA  
ACCGTGCTCCACAGCTGTAAGGCTGTGGGCCCCGAGAGAAGTCGCTCTCTCT  
+  
FFFFFFFFFFFFFF:FFFFFFFFFFFFFFFFFFFFFFFFFFFFFFFFFFFFFFFFFFFFFFFFFFFFFFFF  
@A00155:342:HHGFNDSXY:1:2114:14624:26099 2:N:0:GAACCTAG+TCCGCATA  
GGAGTACATCTCCTTTGGAAGTACAGAGACCCCTCCGGTCTTGTCCAACCTCTGTTTCGGCAGAGGATA  
CCGTGCTCCACAGCTGTAAGGCTGTGGGCCCCGAGAGAAGTCGCTCTCTCTCGCCCTCCACATCCCTCT  
+  
FFFFFFFFFFFFFFFFFFFFFFFFFFFFFFFFFFFFFFFFFFFFFFFFFFFFFFFFFFFFFFFFFFFFFFFF  
FF:FFFFFFFFFFFFFFFFFFFFFFFFFFFFFFFFFFFFFFFFFFFFFFFFFFFFFFFFFFFFFFFFFFFF  
@A00155:342:HHGFNDSXY:1:2136:20573:5869 1:N:0:GAACCTAG+TCCGCATA  
TTCTCTCGGGCCCACAGCCTTACAGCTGTGGAGCACGGTATCCTCTGCCGAAACAGAGGTTGGACAAG  
ACCGGAGGGGTCTCCTAGTTCCAAAGGAGATGTACTCCGGGCTTGTTACGACCTACCGTGTAAGTCG  
+  
FFFFFFFFFFFFFFFFFFFFFFFFFFFFFFFFFFFFFFFFFFFFFFFFFFFFFFFFFFFFFFFFFFFFFFFF  
FFFFFFFFFFFFFFFFFFFFFFFFFFFFFFFFFFFFFFFFFFFFFFFFFFFFFFFFFFFFFFFFFFFF,FFFFFFFFFFFFFF:FFF  
@A00155:342:HHGFNDSXY:1:2149:16197:20494 2:N:0:GAACCTAG+TCCGCATA  
AAAAGGACTCGTCAGGTAGCCTACTAGACTACGACTTACACGGTAGGTCGTGAACAAGCCCGGAGTAC  
ATCTCCTTTGGAACCAGGAGACCCCTCCGGTCTTGTCCAACCTCTGTTTCGGCAGAGGATACCGTGCT  
+  
FFFFFFFFFFFFFFF:FFFFFFF:FFFFFFFFFFFFFFFFFFFFFFFFFFFFFFFFFFFFFFFFFFFFFFF:FFFFFFFFFFFF  
FFFFFFFFFFFFFFFFFFFFFFFFFFFFFFFFFFFFFFFFFFFFFFFFFFFFFFFFFFFFFFFFFFFF,FFFFFFFFFFFF,FF:FFFFFFFFFF,FFFFFFF  
@A00155:342:HHGFNDSXY:1:2172:1443:28447 2:N:0:GAACCTAG+TCCGCATA  
AAGGACTCACCTCTGGCCTATGGTCATCTCAATGCCGAGAGGGATGTGGAGGGCGAGAGAGAGCGACT  
TCTCTCGGGCCCACAGCCTTACAGCTGTGGAGCACGGTATCCTCTGCCGAAACAGAGGTTGGACAAGA  
+  
FFFFFFFFFFFFFFFFFFFFFFFFFFFFFFFFFFFFFFFFFFFFFFFFFFFFFFFFFFFFFFFFFFFFFFFF  
FFFFFFFFFFFFFFFFFFFFFFFFFFFFFFFFFFFFFFFFFFFFFFFFFFFFFFFFFFFFFFFFFFFF,FFFFFFFFFFFF,FFF,FFFFFFF  
FFFFFFFFFFFFFFFFFFFF,FFFFFFFFFFFFFF:FFFFFFFFFF,,,:FFF:FFFFFFFFF,FFFFF:F:FF:  
@A00155:342:HHGFNDSXY:1:2229:24053:6324 1:N:0:GAACCTAG+TCCGCATA  
GGATGTAGAGGGCGAGAGAGAGCGACTTCTCTCGGGCCCACAGCCTTACAGCTGTGGAGCACGGTATC  
CTCTGCCGAAACAGAGGTTGGACAAGACCGGAGGGGTCTCCTAGTTCCAAAGGAGATGTACTCC  
+  
FFFFFFFFFFFFFFFFFFFFFFFFFFFFFFFFFFFFFFFFFFFFFFFFFFFFFFFFFFFFFFFFFFFFFFFF  
FFFFFFFFFFFFFFFFFFFFFFFFFFFFFFFFFFFFFFFFFFFFFFFFFFFFFFFFFFFFFFFFFFFF:FFFFFFFFFFFFFFFFFFFFFFFF  
@A00155:342:HHGFNDSXY:1:2230:18331:12571 1:N:0:GAACCTAG+TCCGCATA  
GGCGAGAGAGAGCGACTTCTCTCGGGCCCACAGCCTTACAGCTGTGGAGCACGGTATCCTCTGCCGAA  
ACAGAGGTTGGACAAGACCGGAGGGGTCTCCTAGTTCCAAAGGAGATGTACTCCGGGCTTGTTACGA  
+  
FFFFFFFFFFFFFFFFFFFFFFFFFFFFFFFFFFFFFFFFFFFFFFFFFFFFFFFFFFFFFFFFFFFFFFFF  
FFFFFFFFFFFFFFFFFFFFFFFFFFFFFFFFFFFFFFFFFFFFFFFFFFFFFFFFFFFFFFFFFFFFF  
@A00155:342:HHGFNDSXY:1:2244:16269:27727 1:N:0:GAACCTAG+TCCGCATA  
ATCCTCTGCCGAAACAGAGGTTGGACAAGACCGGAGGGGTCTCCTAGTTCCAAAGGAGATGTACTCCG

GGCTTGTTACGACCTACCGTGTAAGTCGTAGTCTAGTAGGCTACCTGACGAGTCCTTTTTAGGACGA  
+  
FFFFFFFFFFFFFFFFFFFFFFFFFFFFFFFFFFFFFFFFFFFFFFFFFFFFFFFFFFFFFFFFFFFFFFFF  
FFFFFFFFFFFFFFFFFFFFFFFFFFFFFFFFFFFFFFFFFFFFFFFFFFFFFFFFFFFFFFFFFFFFFFFF  
@A00155:342:HHGFNDSXY:1:2246:15619:17112 1:N:0:GAACCTAG+TCCGCATA  
GTCATCTCAATGCCGAGAGGGATGTGGAGGGCGAGAGAGAGCGACTTCTCTCGGGCCCACAGCCTTAC  
AGCTGTGGAGCACGGTATCCTCTGCCGAAACAGAGGTTGGACAAGACCGGAGGGGTCTCCTGGTTCCA  
+  
FFFFFFFFFFFFFFFFFFFFFFFFFFFFFFFFFFFFFFFFFFFFFFFFFFFFFFFFFFFFFFFFFFFFFFFF  
FFF:FFFFFFFFFFFFFFFFFFFFFFFFFFFFFFFFFFFFFFFFFFFFFFFFFFFFFFFFFFFFFFFFFFFF  
@A00155:342:HHGFNDSXY:1:2257:14669:6230 1:N:0:GAACCTAG+TCCGCATA  
GAGCGACTTCTCTCGGGCCCACAGCCTTACAGCTGTGGAGCACGGTATCCTCTGCCGAAACAGAGGTT  
GGACAAGACCGGAGGGGTCTCCTAGTTCCAAAGGAGATGTACTCCGGGCTTGTTACGACCTACCGTG  
+  
FFFFFFFFFFFFFFFFFFFFFFFFFFFFFFFFFFFFFFFFFFFFFFFFFFFFFFFFFFFFFFFFFFFFFFFF  
FFFFFFFFFFFFFFFFFFFFFFFFFFFFFFFFFFFFFFFFFFFFFFFFFFFFFFFFFFFFFFFFFFFFFFFF  
@A00155:342:HHGFNDSXY:1:2275:20627:13730 1:N:0:GAACCTAG+TCCGCATA  
GGATGTGGAGGGCGAGAGAGAGCGACTTCTCTCGGGCCCACAGCCTTACAGCTGTGGAGCACGGTATC  
CTCTGCCGAAACAGAGGTTGGACAAGACCGGAGGGGTCTCCTAGTTCCAAAGGAGATGTACTCC  
+  
F:FFFFFFFFFFFFFFFFFFFFFFFFFFFFFFFFFFFFFFFFFFFFFFFFFFFFFFFFFFFFFFFFFFFF  
FFFFFFFFFFFFFFFFFFFFFFFFFFFFFFFFFFFFFFFFFFFFFFFFFFFFFFFFFFFFFFFFFFFFFFFF  
@A00155:342:HHGFNDSXY:1:2303:9344:25723 2:N:0:GAACCTAG+TCCGCATA  
TTTCGTCCTAAAAAGGACTCGTCAGGTAGCCTACTAGACTACGACTTACACGGTAGGTCGTGAACAAG  
CCCGGAGTACATCTCCTTTGGAACCAGGAGACCCCTCCGGTCTTGTCCAACCTCTGTTTCGGCAGAGG  
+  
FFFFFFFFFFFFFFFFFFFFFFFFFFFFFFFFFFFFFFFFFFFFFFFFFFFFFFFFFFFFFFFFFFFFFFFF  
FFFFFFFFFFFFFFFFFFFFFFFFFFFFFFFFFFFFFFFFFFFFFFFFFFFFFFFFFFFFFFFFFFFFFFFF  
@A00155:342:HHGFNDSXY:1:2303:31901:36573 1:N:0:GAACCTAG+TCCGCATA  
TGTGGAGGGCGAGAGAGAGCGACTTCTCTCGGGCCCACAGCCTTACAGCTGTGGAGCACGGTATCCTC  
TGCCGAAACAGAGGTTGGACAAGACCGGAGGGGTCTCCTAGTTCCAAAGGAGATGTACTCCGGG  
+  
FFFFFFF,FFFFFFFFFFFFFFFFFFFFFFFFFFFFFFFFFFFFFFFFFFFFFFFFFFFFFFFFFFFFFFF  
FFFFFFFFFFFFFFFFFFFFFFFFFFFFFFFFFFFFFFFFFFFFFFFFFFFFFFFFFFFFFFFFFFFFFFFF  
@A00155:342:HHGFNDSXY:1:2303:31837:36589 1:N:0:GAACCTAG+TCCGCATA  
TGTGGAGGGCGAGAGAGAGCGACTTCTCTCGGGCCCACAGCCTTACAGCTGTGGAGCACGGTATCCTC  
TGCCGAAACAGAGGTTGGACAAGACCGGAGGGGTCTCCTAGTTCCAAAGGAGATGTACTCCGGG  
+  
FFFFFFFFFFFFFFFFFFFFFFFFFFFFFFFFFFFFFFFFFFFFFFFFFFFFFFFFFFFFFFFFFFFFFFFF  
FFFFFFFFFFFFFFFFFFFFFFFFFFFFFFFFFFFFFFFFFFFFFFFFFFFFFFFFFFFFFFFFFFFFFFFF  
@A00155:342:HHGFNDSXY:1:2307:7536:5807 1:N:0:GAACCTAG+TCCGCATA  
ATCCTCTGCCGAAACAGAGGTTGGACAAGACCGGAGGGGTCTCCTAGTTCCAAAAGAGATGTACTCCG  
GGCTTGTTACGACCTACCGTGTAAGTCGTAGTCTAGTAGGCTACCTGACGAGTCCTTTTTAGGACGA  
+  
FFFFFFFFF:FFFFF,F:FF,,FFFFFFFF,FFFF,FFF,FFFFFFFFFFFFFFFFFFFFFFFFFFFFF  
FFF:,FFFFFFFF:FFFFFF:FF:FFFF,FF:::FF:FFFFFFFFF,,:FFF::FFFF,FFF:  
@A00155:342:HHGFNDSXY:1:2345:24451:3912 1:N:0:GAACCTAG+TCCGCATA  
AGAGAGAGCGACTTCTCTCGGGCCCACAGCCTTACAGCTGTGGAGCACGGTATCCTCTGCCGAAACAG  
AGGTTGGACAAGACCGGAGGGGTCTCCTGGTTCCAAAGGAGATGTACTCCGGGCTTGTTACGACCT  
+  
FFFFFFFFFFFFFFFFFFFFFFFFFFFFFFFFFFFFFFFFFFFFFFFFFFFFFFFFFFFFFFFFFFFFFFFF  
FFFFFFFFFFFFFFFFFFFFFFFFFFFFFFFFFFFFFFFFFFFFFFFFFFFFFFFFFFFFFFFFFFFFFFFF  
@A00155:342:HHGFNDSXY:1:2345:24813:4507 1:N:0:GAACCTAG+TCCGCATA  
AGAGAGAGCGACTTCTCTCGGGCCCACAGCCTTACAGCTGTGGAGCACGGTATCCTCTGCCGAAACAG



AGGTTGGACAAGACCGGAGGGGTCTCCTGGTTCCAAAGGAGATGTACTCCGGGCTTGTTACACGACCTA  
+  
FFFFFFFFFFFFFFFFFFFFFFFFFFFFFFFFFFFFFFFFFFFFFFFFFFFFFFFFFFFFFFFFFFFFFFFF  
FFFFFFFFFFFFFFFFFFFFFFFFFFFFFFFFFFFFFFFFFFFFFFFFFFFFFFFFFFFFFFFFFFFFFFFF:FFFFFFFFFFFF  
@A00155:342:HHGFNDSXY:1:2353:12255:15107 1:N:0:GAACCTAG+TCCGCATA  
AGCGACTTCTCTCGGGCCACAGCCTTACAGCTGTGGAGCACGGTATCCTCTGCCGAAACAGAGGTTG  
GACAAGACCGGAGGGGTCTCCTAGTTCCAAAGGAGATGTACTCCGGGCTTGTTACACGACCTACCGTGT  
+  
FFFFFFFFFFFFFFFFFFFFFFFFFFFFFFFFFFFFFFFFFFFFFFFFFFFFFFFFFFFFFFFFFFFFFFFF  
FFFFFFFFFFFFFFFFFFFFFFFFFFFFFFFFFFFFFFFFFFFFFFFFFFFFFFFFFFFFFFFFFFFFFFFF:FFFFFFFFFFFF  
@A00155:342:HHGFNDSXY:1:2353:12246:18255 1:N:0:GAACCTAG+TCCGCATA  
AGCGACTTCTCTCGGGCCACAGCCTTACAGCTGTGGAGCACGGTATCCTCTGCCGAAACAGAGGTTG  
GACAAGACCGGAGGGGTCTCCTAGTTCCAAAGGAGATGTACTCCGGGCTTGTTACACGACCTACCGTGT  
+  
FFFFFFFFFFFFFFFFFFFFFFFFFFFFFFFFFFFFFFFFFFFFFFFFFFFFFFFFFFFFFFFFFFFFFFFF  
FFFFFFFFFFFFFFFFFFFFFFFFFFFFFFFFFFFFFFFFFFFFFFFFFFFFFFFFFFFFFFFFFFFFFFFF  
@A00155:342:HHGFNDSXY:1:2361:12481:4726 2:N:0:GAACCTAG+TCCGCATA  
CCTACTAGACTACGACTTACACGGTAGGTCGTGAACAAGCCCGAGTACATCTCCTTTGGAAGTAGGA  
GACCCCTCCGGTCTTGTCCAACCTCTGTTTCGGCAGAGGATACCGTGCTCCACAGCTGTAAGGCTGTG  
+  
FFFFFFFFFFFFFFFFFFFFFFFFFFFFFFFFFFFFFFFFFFFFFFFFFFFFFFFFFFFFFFFFFFFFFFFF  
FFFFFFFFFFFFFFFFFFFFFFFFFFFFFFFFFFFFFFFFFFFFFFFFFFFFFFFFFFFFFFFFFFFFFFFF  
@A00155:342:HHGFNDSXY:1:2403:32859:29778 1:N:0:GAACCTAG+TCCGCATA  
AGAGGATACCGTGCTCCACAGCTGTAAGGCTGTGGGCCCGAGAGAAGTCGC  
+  
FFFFFFFFFFFFF::FFFFFFFF:FFFFFFFFFFFFFFFFFFFFFFFFFFFFFFFFFFFFFFFFFFFFF  
@A00155:342:HHGFNDSXY:1:2443:26775:14794 2:N:0:GAACCTAG+TCCGCATA  
TCGTCCTAAAAAGGACTCGTCAGGTAGCCTACTAGACTACGACTTACACGGTAGGTCGTGAACAAGCC  
CGGAGTACATCTCCTTTGGAAGTAGGAGACCCCTCCGGTCTTGTCCAACCTCTGTTTCGGCAGAGGAT  
+  
FFFF,FFFFFFFFFFFFFFFFFFFFFFFFFFFFFFFFFFFFFFFFFFFFFFFFFFFFFFFFFFFFFFFF  
FFFF:FFFFFFFFFFFFF:FFFFFFFFFFFF,FFFFFFFFFFFF:FF:FFFFFFFFFFFF:FF::FFFFF,FF  
@A00155:342:HHGFNDSXY:1:2472:31204:23657 1:N:0:GAACCTAG+TCCGCATA  
CTTCTCTCGGGCCACAGCCTTACAGCTGTGGAGCACGGTATCCTCTGCCGAAACAGAGGTTGGACAA  
GACCGGAGGGGTCTCCTAGTTCCAAAGGAGATGTACTCCGGGCTTGTTACACGACCTACCGTGTAAGTC  
+  
F:FF,FFFFFFFFFFFF:FFFFF:F:FFFFFFFFFFFFFFFFFFFFFFFFFFFFFFFFFFFFFFFFFFFF:FFFFF  
F:FFFFFFFFFFFFFFFFFFFFF:FFFFFFFFFFFF:FFFFFFFFFFFFF,,FFFFFFFFFFFFFFFFFFFFF  
@A00155:342:HHGFNDSXY:1:2503:30563:23484 1:N:0:GAACCTAG+TCCGCATA  
GCGAGAGAGAGCGACTTCTCTCGGGCCACAGCCTTACAGCTGTGGAGCACGGTATCCTCTGCCGAAA  
CAGAGGTTGGACAAGACCGGAGGGGTCTCCTAGTTCCAAAGGAGATGTACTCCGGGCTTGTTACGA  
+  
FF:FFFFFFFFFFFFFFFFFFFF:FFFFF:F:,FFFFFFF,FFFFFFFF:F,F,FF:FFFFFFFFFFFF,FF:FF,:FF  
FFFFF:FFFFFFFFFFFF:FF,FFFFF::,FFFFFFF:,FF:FFFFFFFFFFFF:,FFFFF,,::FF:F:FF:FF  
@A00155:342:HHGFNDSXY:1:2506:21567:27853 1:N:0:GAACCTAG+TCCGCATA  
GAGCGACTTCTCTCGGGCCACAGCCTTACAGCTGTGGAGCACGGTATCCTCTGCCGAAACAGAGGTT  
GGACAAGACCGGAGGGGTCTCCTAGTTCCAAAGGAGATGTACTCCGGGCTTGTTACACGACCTACCGTG  
+  
FFFFFFFFFFFFFFFFFFFFFFFFFFFFFFFFFFFFFFFFFFFFFFFFFFFFFFFFFFFFFFFFFFFFFFFF  
FFFFFFFFFFFFFFFFFFFFFFFFFFFFFFFFFFFFFFFFFFFFFFFFFFFFFFFFFFFFFFFFFFFFFFFF:FFFFF  
@A00155:342:HHGFNDSXY:1:2520:19397:32643 1:N:0:GAACCTAG+TCCGCATA  
GGCGAGAGAGAGCGACTTCTCTCGGGCCACAGCCTTACAGCTGTGGAGCACGGTATCCTCTGCCGAA  
ACAGAGGTTGGACAAGACCGGAGGGGTCTCCTAGTTCCAAAGGAGATGTACTCCGGGCTTGTTACGA  
+

FFFFFFFFFFFFFFFFFFFFFFFFFFFFFFFFFFFFFFFFFFFFFFFFFFFFFFFFFFFFFFFFFFFFFFFF  
FFFFFFFFFFFFFFFFFFFFFFFFFFFFFFFFFFFFFFFFFFFFFFFFFFFFFFFFFFFFFFFFFFFFFFFF:FFFFFFFF  
@A00155:342:HHGFNDSXY:1:2553:13810:11851 2:N:0:GAACCTAG+TCCGCATA  
AAGGACGAAACCGTCGTTACTCTTTGAGTTGTGTAAGTTTCGTCCTAAAAAGGACTCGTCAGGTAGCC  
TACTAGACTACGACTTACACGGTAGGTCGTGAACAAGCCCGGAGTACATCTCCTTTGGAAGTAGGAG  
+  
FFFFFFFF:F:FFFFFFFF:F:,F:F:, :FFFFFFFFFFFFFFFF:F:,F:F:FFFF:,FF:FFFFFFFF  
FFFFFFFFFFFFFFFFFFFFFFFFFFFFFFFFFFFFFFFF,,F,, :FFFF:FFFF:FFFF:,FFF:FFFFFF  
@A00155:342:HHGFNDSXY:1:2557:9127:8531 2:N:0:GAACCTAG+TCCGCATA  
AAGGACTCGTCAGGTAGCCTACTAGACTACGACTTACACGGTAGGTCGTGAACAAGCCCGGAGTACAT  
CTCCTTTGGAAGTAGGAGACCCCTCCGGTCTTGTCCAACCTCTGTTTCGGCAGAGGATACCGTG  
+  
FFFFFFFFF,FFFF,FFFFFFFFFFFFFFFFFFFFFFFFFFFFFFFFFFFFFFFFFFFFFFFFFFFFF  
FFFF,F,FFFFFFFFFFFFFFFFF,:FF,FF:FFFFFFFFFFFFFFFF:FFF:FFFFFFFF:FFFF  
@A00155:342:HHGFNDSXY:1:2563:32009:23484 2:N:0:GAACCTAG+TCCGCATA  
CGAAACTTACACAACCTCGAAGAGTAACGACGGTTTCGTCTTGGAACGGACTCATCAGGGAGCCTACT  
AGACTCCGACCGTCATGGGGGTTCAAACCCATGCCCCACCACACCGCCTTAGATCAGCTGTGTCCACT  
+  
FFFFFF:FFFF,FFFFFFFFFFFFFFFFFFFFFFFFFFFFFFFFFFFFFFFFFFFFFFFFFFFFFFFFF  
FFFFFFFFFFFFFFFFF:FFFFFFFFFFFFFFFF:FFFF:FFFFFF:FFFFFFFFFFFFFFFFFFFFF  
@A00155:342:HHGFNDSXY:1:2567:23610:3082 2:N:0:GAACCTAG+TCCGCATA  
GTAAGTTTCGTCCTAAAAAGGACTCGTCAGGTAGCCTACTAGACTACGACTTACACGGTAGGTCGTGA  
ACAAGCCCGGAGTACATCTCCTTTGGAAGTAGGAGACCCCTCCGGTCTTGTCCAACCTCTGTTTCGGC  
+  
FFFFFFFFFFFFFFFFFFFFFFFFFFFFFFFFFFFFFFFFFFFFFFFFFFFFFFFFFFFFFFFFFFFFF  
FFFF:FFFFFFFFFFFFFFFFFFFFFFFFFFFFFFFFF:,F,FFFFFFFFFFFFFFFFFFFFFFFFFFFFF  
@A00155:342:HHGFNDSXY:1:2569:18502:35352 1:N:0:GAACCTAG+TCCGCATA  
GAGAGGGATGTGGAGGGCGAGAGAGAGCGACTTCTCTCGGGCCACAGCCTTACAGCTGTGGAGCACG  
GTATCCTCTGCCGAAACAGAGGTTGGACAAGACCGGAGGGGTCTCCTGGTTCCAAAGGAGATGTACTC  
+  
:::F,::FF:,FFFF:FF:FFFFFFFFF:,F,, :FF,:FF:F:,F,FFF:FF:, ,FFFFFF:FF:F  
,FFFFFFFF:F:FFFFFFFF:F,F:FFFFFFFFF:FFFF,,: ,FFF:FF,FFF:FF,FFF:, ,:FF  
@A00155:342:HHGFNDSXY:1:2613:22290:2926 1:N:0:GAACCTAG+TCCGCATA  
GAGCGACTTCTCTCGGGCCACAGCCTTACAGCTGTGGAGCACGGTATCCTCTGCCGAAACAGAGGTT  
GGACAAGACCGGAGGGGTCTCCTGGTTCCAAAGGAGATGTACTCCGGGCTTGTTACAGACCTACCGTG  
+  
FFFFFFFFF:FFFFFFFFFFFFFFFFFFFFFFFFF,FFFFFFFFF:FFFFF:FFFFFFFFFFFFFFFFF  
FFFFFFFFFFFFFFFFFFFFFFFFFFFFFFFFFFFFFFFFFFFFFFFFFFFFFFFFF:F:FF,FFFFFFFFFFFFFFFFF:  
@A00155:342:HHGFNDSXY:1:2619:28917:18818 2:N:0:GAACCTAG+TCCGCATA  
AACTAGGAGACCCCTCCGGTCTTGTCCAACCTCTGTTTCGGCAGAGGATACCGTGCTCCACAGCTGTA  
AGGCTGTGGGCCCCGAGAGAAGTCGCTCTCTCTCGCCCTCCACATCCCTCTCGGCATTGAGATGACCAT  
+  
FFFFFFFFFFFFFFFFFFFFFFFFF,FFFFFFFFF:FFFFFFFFFFFFFFFFFFFFFFFFFFFFFFFFF  
FFFFFFFFFFFFFFFFFFFFFFFFFFFFFFFFF:FFFFFFFFFFFFFFFFFFFFFFFFF:FFFFFFFFFFFFF  
@A00155:342:HHGFNDSXY:1:2619:29297:18912 2:N:0:GAACCTAG+TCCGCATA  
AACTAGGAGACCCCTCCGGTCTTGTCCAACCTCTGTTTCGGCAGAGGATACCGTGCTCCACAGCTGTA  
AGGCTGTGGGCCCCGAGAGAAGTCGCTCTCTCTCGCCCTCCACATCCCTCTCGGCATTGAGATGACCAT  
+  
FFFFFFFFFFFFFFFFFFFFFFFFF,FFFFFFFFFFFFFFFFFFFFFFFFFFFFFFFFFFFFFFFFF  
FFFFFFFFFFFFFFFFFFFFFFFFF:FFFFFFFFFFFFFFFFFFFFFFFFF:FFFFFFFFFFFFFFFFF,FFFF  
@A00155:342:HHGFNDSXY:1:2619:11297:25598 1:N:0:GAACCTAG+TCCGCATA  
AGAGAGAGCGACTTCTCTCGGGCCACAGCCTTACAGCTGTGGAGCACGGTATCCTCTGCCGAAACAG  
AGGTTGACAAGACCGGAGGGGTCTCCTGGTTCCAAAGGAGATGTACTCCGGGCTTGTTACAGACCTA  
+

[illegible]
